# Supplementary material
Source: ML conference proceedings conference paper supplement (https://proceedings.neurips.cc/paper_files/paper/2021/hash/0fd600c953cde8121262e322ef09f70e-Abstract.html)
Supplement: Supplementary file 1 [file 0fd600c953cde8121262e322ef09f70e-Supplemental.zip]

Archive with 56,152 entries (9,864 files):
- Supplementary_Material_Paper_8745/
- Supplementary_Material_Paper_8745/generate_rules.py
- Supplementary_Material_Paper_8745/negative_sampling.py
- Supplementary_Material_Paper_8745/.DS_Store
- __MACOSX/
- __MACOSX/Supplementary_Material_Paper_8745/
- __MACOSX/Supplementary_Material_Paper_8745/._.DS_Store
- Supplementary_Material_Paper_8745/test_pattern.py
- Supplementary_Material_Paper_8745/utils/
- Supplementary_Material_Paper_8745/utils/.DS_Store
- __MACOSX/Supplementary_Material_Paper_8745/utils/
- __MACOSX/Supplementary_Material_Paper_8745/utils/._.DS_Store
- Supplementary_Material_Paper_8745/utils/utils_train.py
- __MACOSX/Supplementary_Material_Paper_8745/utils/._utils_train.py
- Supplementary_Material_Paper_8745/utils/utils_test.py
- __MACOSX/Supplementary_Material_Paper_8745/utils/._utils_test.py
- Supplementary_Material_Paper_8745/utils/utils_test_pattern.py
- Supplementary_Material_Paper_8745/utils/utils_test_e_hits.py
- Supplementary_Material_Paper_8745/utils/accuracy.py
- __MACOSX/Supplementary_Material_Paper_8745/utils/._accuracy.py
- Supplementary_Material_Paper_8745/utils/tool.py
- __MACOSX/Supplementary_Material_Paper_8745/utils/._tool.py
- Supplementary_Material_Paper_8745/models/
- Supplementary_Material_Paper_8745/models/.ipynb_checkpoints/
- Supplementary_Material_Paper_8745/test.py
- __MACOSX/Supplementary_Material_Paper_8745/._test.py
- Supplementary_Material_Paper_8745/README.md
- __MACOSX/Supplementary_Material_Paper_8745/._README.md
- Supplementary_Material_Paper_8745/Appendix.pdf
- __MACOSX/Supplementary_Material_Paper_8745/._Appendix.pdf
- Supplementary_Material_Paper_8745/test_e_hits.py
- Supplementary_Material_Paper_8745/GNN/
- Supplementary_Material_Paper_8745/GNN/.DS_Store
- __MACOSX/Supplementary_Material_Paper_8745/GNN/
- __MACOSX/Supplementary_Material_Paper_8745/GNN/._.DS_Store
- Supplementary_Material_Paper_8745/GNN/model.py
- __MACOSX/Supplementary_Material_Paper_8745/GNN/._model.py
- Supplementary_Material_Paper_8745/GNN/layer.py
- __MACOSX/Supplementary_Material_Paper_8745/GNN/._layer.py
- Supplementary_Material_Paper_8745/generate_assignments.py
- Supplementary_Material_Paper_8745/train.py
- __MACOSX/Supplementary_Material_Paper_8745/._train.py
- Supplementary_Material_Paper_8745/.ipynb_checkpoints/
- Supplementary_Material_Paper_8745/data/
- Supplementary_Material_Paper_8745/data/GraIL-BM_fb237_v3/
- Supplementary_Material_Paper_8745/data/GraIL-BM_fb237_v3/.DS_Store
- __MACOSX/Supplementary_Material_Paper_8745/data/
- __MACOSX/Supplementary_Material_Paper_8745/data/GraIL-BM_fb237_v3/
- __MACOSX/Supplementary_Material_Paper_8745/data/GraIL-BM_fb237_v3/._.DS_Store
- Supplementary_Material_Paper_8745/data/GraIL-BM_fb237_v3/test/
- Supplementary_Material_Paper_8745/data/GraIL-BM_fb237_v3/test/test-fact.txt
- __MACOSX/Supplementary_Material_Paper_8745/data/GraIL-BM_fb237_v3/test/
- __MACOSX/Supplementary_Material_Paper_8745/data/GraIL-BM_fb237_v3/test/._test-fact.txt
- Supplementary_Material_Paper_8745/data/GraIL-BM_fb237_v3/test/.DS_Store
- __MACOSX/Supplementary_Material_Paper_8745/data/GraIL-BM_fb237_v3/test/._.DS_Store
- Supplementary_Material_Paper_8745/data/GraIL-BM_fb237_v3/test/test-graph.txt
- __MACOSX/Supplementary_Material_Paper_8745/data/GraIL-BM_fb237_v3/test/._test-graph.txt
- Supplementary_Material_Paper_8745/data/GraIL-BM_fb237_v3/test/test-random-sample/
- Supplementary_Material_Paper_8745/data/GraIL-BM_fb237_v3/test/test-random-sample/test7.txt
- Supplementary_Material_Paper_8745/data/GraIL-BM_fb237_v3/test/test-random-sample/test6.txt
- Supplementary_Material_Paper_8745/data/GraIL-BM_fb237_v3/test/test-random-sample/test4.txt
- Supplementary_Material_Paper_8745/data/GraIL-BM_fb237_v3/test/test-random-sample/test5.txt
- Supplementary_Material_Paper_8745/data/GraIL-BM_fb237_v3/test/test-random-sample/test1.txt
- Supplementary_Material_Paper_8745/data/GraIL-BM_fb237_v3/test/test-random-sample/test0.txt
- Supplementary_Material_Paper_8745/data/GraIL-BM_fb237_v3/test/test-random-sample/test2.txt
- Supplementary_Material_Paper_8745/data/GraIL-BM_fb237_v3/test/test-random-sample/test3.txt
- Supplementary_Material_Paper_8745/data/GraIL-BM_fb237_v3/test/test-random-sample/test8.txt
- Supplementary_Material_Paper_8745/data/GraIL-BM_fb237_v3/test/test-random-sample/test9.txt
- Supplementary_Material_Paper_8745/data/GraIL-BM_fb237_v3/test/.ipynb_checkpoints/
- Supplementary_Material_Paper_8745/data/GraIL-BM_fb237_v3/train/
- Supplementary_Material_Paper_8745/data/GraIL-BM_fb237_v3/train/train.txt
- __MACOSX/Supplementary_Material_Paper_8745/data/GraIL-BM_fb237_v3/train/
- __MACOSX/Supplementary_Material_Paper_8745/data/GraIL-BM_fb237_v3/train/._train.txt
- Supplementary_Material_Paper_8745/data/GraIL-BM_fb237_v3/train/valid.txt
- __MACOSX/Supplementary_Material_Paper_8745/data/GraIL-BM_fb237_v3/train/._valid.txt
- Supplementary_Material_Paper_8745/data/GraIL-BM_fb237_v4/
- Supplementary_Material_Paper_8745/data/GraIL-BM_fb237_v4/.DS_Store
- __MACOSX/Supplementary_Material_Paper_8745/data/GraIL-BM_fb237_v4/
- __MACOSX/Supplementary_Material_Paper_8745/data/GraIL-BM_fb237_v4/._.DS_Store
- Supplementary_Material_Paper_8745/data/GraIL-BM_fb237_v4/test/
- Supplementary_Material_Paper_8745/data/GraIL-BM_fb237_v4/test/test-fact.txt
- __MACOSX/Supplementary_Material_Paper_8745/data/GraIL-BM_fb237_v4/test/
- __MACOSX/Supplementary_Material_Paper_8745/data/GraIL-BM_fb237_v4/test/._test-fact.txt
- Supplementary_Material_Paper_8745/data/GraIL-BM_fb237_v4/test/.DS_Store
- __MACOSX/Supplementary_Material_Paper_8745/data/GraIL-BM_fb237_v4/test/._.DS_Store
- Supplementary_Material_Paper_8745/data/GraIL-BM_fb237_v4/test/test-graph.txt
- __MACOSX/Supplementary_Material_Paper_8745/data/GraIL-BM_fb237_v4/test/._test-graph.txt
- Supplementary_Material_Paper_8745/data/GraIL-BM_fb237_v4/test/test-random-sample/
- Supplementary_Material_Paper_8745/data/GraIL-BM_fb237_v4/test/test-random-sample/test7.txt
- Supplementary_Material_Paper_8745/data/GraIL-BM_fb237_v4/test/test-random-sample/test6.txt
- Supplementary_Material_Paper_8745/data/GraIL-BM_fb237_v4/test/test-random-sample/test4.txt
- Supplementary_Material_Paper_8745/data/GraIL-BM_fb237_v4/test/test-random-sample/test5.txt
- Supplementary_Material_Paper_8745/data/GraIL-BM_fb237_v4/test/test-random-sample/test1.txt
- Supplementary_Material_Paper_8745/data/GraIL-BM_fb237_v4/test/test-random-sample/test0.txt
- Supplementary_Material_Paper_8745/data/GraIL-BM_fb237_v4/test/test-random-sample/test2.txt
- Supplementary_Material_Paper_8745/data/GraIL-BM_fb237_v4/test/test-random-sample/test3.txt
- Supplementary_Material_Paper_8745/data/GraIL-BM_fb237_v4/test/test-random-sample/test8.txt
- Supplementary_Material_Paper_8745/data/GraIL-BM_fb237_v4/test/test-random-sample/test9.txt
- Supplementary_Material_Paper_8745/data/GraIL-BM_fb237_v4/test/.ipynb_checkpoints/
- Supplementary_Material_Paper_8745/data/GraIL-BM_fb237_v4/train/
- Supplementary_Material_Paper_8745/data/GraIL-BM_fb237_v4/train/train.txt
- __MACOSX/Supplementary_Material_Paper_8745/data/GraIL-BM_fb237_v4/train/
- __MACOSX/Supplementary_Material_Paper_8745/data/GraIL-BM_fb237_v4/train/._train.txt
- Supplementary_Material_Paper_8745/data/GraIL-BM_fb237_v4/train/valid.txt
- __MACOSX/Supplementary_Material_Paper_8745/data/GraIL-BM_fb237_v4/train/._valid.txt
- Supplementary_Material_Paper_8745/data/GraIL-BM_nell_v1/
- Supplementary_Material_Paper_8745/data/GraIL-BM_nell_v1/.DS_Store
- __MACOSX/Supplementary_Material_Paper_8745/data/GraIL-BM_nell_v1/
- __MACOSX/Supplementary_Material_Paper_8745/data/GraIL-BM_nell_v1/._.DS_Store
- Supplementary_Material_Paper_8745/data/GraIL-BM_nell_v1/test/
- Supplementary_Material_Paper_8745/data/GraIL-BM_nell_v1/test/test-fact.txt
- __MACOSX/Supplementary_Material_Paper_8745/data/GraIL-BM_nell_v1/test/
- __MACOSX/Supplementary_Material_Paper_8745/data/GraIL-BM_nell_v1/test/._test-fact.txt
- Supplementary_Material_Paper_8745/data/GraIL-BM_nell_v1/test/.DS_Store
- __MACOSX/Supplementary_Material_Paper_8745/data/GraIL-BM_nell_v1/test/._.DS_Store
- Supplementary_Material_Paper_8745/data/GraIL-BM_nell_v1/test/test-graph.txt
- __MACOSX/Supplementary_Material_Paper_8745/data/GraIL-BM_nell_v1/test/._test-graph.txt
- Supplementary_Material_Paper_8745/data/GraIL-BM_nell_v1/test/test-random-sample/
- Supplementary_Material_Paper_8745/data/GraIL-BM_nell_v1/test/test-random-sample/test7.txt
- Supplementary_Material_Paper_8745/data/GraIL-BM_nell_v1/test/test-random-sample/test6.txt
- Supplementary_Material_Paper_8745/data/GraIL-BM_nell_v1/test/test-random-sample/test4.txt
- Supplementary_Material_Paper_8745/data/GraIL-BM_nell_v1/test/test-random-sample/test5.txt
- Supplementary_Material_Paper_8745/data/GraIL-BM_nell_v1/test/test-random-sample/test1.txt
- Supplementary_Material_Paper_8745/data/GraIL-BM_nell_v1/test/test-random-sample/test0.txt
- Supplementary_Material_Paper_8745/data/GraIL-BM_nell_v1/test/test-random-sample/test2.txt
- Supplementary_Material_Paper_8745/data/GraIL-BM_nell_v1/test/test-random-sample/test3.txt
- Supplementary_Material_Paper_8745/data/GraIL-BM_nell_v1/test/test-random-sample/test8.txt
- Supplementary_Material_Paper_8745/data/GraIL-BM_nell_v1/test/test-random-sample/test9.txt
- Supplementary_Material_Paper_8745/data/GraIL-BM_nell_v1/test/.ipynb_checkpoints/
- Supplementary_Material_Paper_8745/data/GraIL-BM_nell_v1/train/
- Supplementary_Material_Paper_8745/data/GraIL-BM_nell_v1/train/train.txt
- __MACOSX/Supplementary_Material_Paper_8745/data/GraIL-BM_nell_v1/train/
- __MACOSX/Supplementary_Material_Paper_8745/data/GraIL-BM_nell_v1/train/._train.txt
- Supplementary_Material_Paper_8745/data/GraIL-BM_nell_v1/train/valid.txt
- __MACOSX/Supplementary_Material_Paper_8745/data/GraIL-BM_nell_v1/train/._valid.txt
- Supplementary_Material_Paper_8745/data/GraIL-BM_fb237_v2/
- Supplementary_Material_Paper_8745/data/GraIL-BM_fb237_v2/.DS_Store
- __MACOSX/Supplementary_Material_Paper_8745/data/GraIL-BM_fb237_v2/
- __MACOSX/Supplementary_Material_Paper_8745/data/GraIL-BM_fb237_v2/._.DS_Store
- Supplementary_Material_Paper_8745/data/GraIL-BM_fb237_v2/test/
- Supplementary_Material_Paper_8745/data/GraIL-BM_fb237_v2/test/test-fact.txt
- __MACOSX/Supplementary_Material_Paper_8745/data/GraIL-BM_fb237_v2/test/
- __MACOSX/Supplementary_Material_Paper_8745/data/GraIL-BM_fb237_v2/test/._test-fact.txt
- Supplementary_Material_Paper_8745/data/GraIL-BM_fb237_v2/test/.DS_Store
- __MACOSX/Supplementary_Material_Paper_8745/data/GraIL-BM_fb237_v2/test/._.DS_Store
- Supplementary_Material_Paper_8745/data/GraIL-BM_fb237_v2/test/test-graph.txt
- __MACOSX/Supplementary_Material_Paper_8745/data/GraIL-BM_fb237_v2/test/._test-graph.txt
- Supplementary_Material_Paper_8745/data/GraIL-BM_fb237_v2/test/test-random-sample/
- Supplementary_Material_Paper_8745/data/GraIL-BM_fb237_v2/test/test-random-sample/test7.txt
- Supplementary_Material_Paper_8745/data/GraIL-BM_fb237_v2/test/test-random-sample/test6.txt
- Supplementary_Material_Paper_8745/data/GraIL-BM_fb237_v2/test/test-random-sample/test4.txt
- Supplementary_Material_Paper_8745/data/GraIL-BM_fb237_v2/test/test-random-sample/test5.txt
- Supplementary_Material_Paper_8745/data/GraIL-BM_fb237_v2/test/test-random-sample/test1.txt
- Supplementary_Material_Paper_8745/data/GraIL-BM_fb237_v2/test/test-random-sample/test0.txt
- Supplementary_Material_Paper_8745/data/GraIL-BM_fb237_v2/test/test-random-sample/test2.txt
- Supplementary_Material_Paper_8745/data/GraIL-BM_fb237_v2/test/test-random-sample/test3.txt
- Supplementary_Material_Paper_8745/data/GraIL-BM_fb237_v2/test/test-random-sample/test8.txt
- Supplementary_Material_Paper_8745/data/GraIL-BM_fb237_v2/test/test-random-sample/test9.txt
- Supplementary_Material_Paper_8745/data/GraIL-BM_fb237_v2/test/.ipynb_checkpoints/
- Supplementary_Material_Paper_8745/data/GraIL-BM_fb237_v2/train/
- Supplementary_Material_Paper_8745/data/GraIL-BM_fb237_v2/train/train.txt
- __MACOSX/Supplementary_Material_Paper_8745/data/GraIL-BM_fb237_v2/train/
- __MACOSX/Supplementary_Material_Paper_8745/data/GraIL-BM_fb237_v2/train/._train.txt
- Supplementary_Material_Paper_8745/data/GraIL-BM_fb237_v2/train/valid.txt
- __MACOSX/Supplementary_Material_Paper_8745/data/GraIL-BM_fb237_v2/train/._valid.txt
- Supplementary_Material_Paper_8745/data/GraIL-BM_fb237_v2/train/.ipynb_checkpoints/
- Supplementary_Material_Paper_8745/data/.DS_Store
- __MACOSX/Supplementary_Material_Paper_8745/data/._.DS_Store
- Supplementary_Material_Paper_8745/data/Hamaguchi-BM_tail-5000/
- Supplementary_Material_Paper_8745/data/Hamaguchi-BM_tail-5000/.DS_Store
- __MACOSX/Supplementary_Material_Paper_8745/data/Hamaguchi-BM_tail-5000/
- __MACOSX/Supplementary_Material_Paper_8745/data/Hamaguchi-BM_tail-5000/._.DS_Store
- Supplementary_Material_Paper_8745/data/Hamaguchi-BM_tail-5000/test/
- Supplementary_Material_Paper_8745/data/Hamaguchi-BM_tail-5000/test/test-fact.txt
- Supplementary_Material_Paper_8745/data/Hamaguchi-BM_tail-5000/test/.DS_Store
- __MACOSX/Supplementary_Material_Paper_8745/data/Hamaguchi-BM_tail-5000/test/
- __MACOSX/Supplementary_Material_Paper_8745/data/Hamaguchi-BM_tail-5000/test/._.DS_Store
- Supplementary_Material_Paper_8745/data/Hamaguchi-BM_tail-5000/test/test-graph.txt
- Supplementary_Material_Paper_8745/data/Hamaguchi-BM_tail-5000/test/test-random-sample/
- Supplementary_Material_Paper_8745/data/Hamaguchi-BM_tail-5000/test/test-random-sample/test7.txt
- Supplementary_Material_Paper_8745/data/Hamaguchi-BM_tail-5000/test/test-random-sample/test6.txt
- Supplementary_Material_Paper_8745/data/Hamaguchi-BM_tail-5000/test/test-random-sample/test4.txt
- Supplementary_Material_Paper_8745/data/Hamaguchi-BM_tail-5000/test/test-random-sample/test5.txt
- Supplementary_Material_Paper_8745/data/Hamaguchi-BM_tail-5000/test/test-random-sample/test1.txt
- Supplementary_Material_Paper_8745/data/Hamaguchi-BM_tail-5000/test/test-random-sample/test0.txt
- Supplementary_Material_Paper_8745/data/Hamaguchi-BM_tail-5000/test/test-random-sample/test2.txt
- Supplementary_Material_Paper_8745/data/Hamaguchi-BM_tail-5000/test/test-random-sample/test3.txt
- Supplementary_Material_Paper_8745/data/Hamaguchi-BM_tail-5000/test/test-random-sample/test8.txt
- Supplementary_Material_Paper_8745/data/Hamaguchi-BM_tail-5000/test/test-random-sample/test9.txt
- Supplementary_Material_Paper_8745/data/Hamaguchi-BM_tail-5000/train/
- Supplementary_Material_Paper_8745/data/Hamaguchi-BM_tail-5000/train/train.txt
- Supplementary_Material_Paper_8745/data/Hamaguchi-BM_tail-5000/train/valid.txt
- Supplementary_Material_Paper_8745/data/Hamaguchi-BM_tail-1000/
- Supplementary_Material_Paper_8745/data/Hamaguchi-BM_tail-1000/.DS_Store
- __MACOSX/Supplementary_Material_Paper_8745/data/Hamaguchi-BM_tail-1000/
- __MACOSX/Supplementary_Material_Paper_8745/data/Hamaguchi-BM_tail-1000/._.DS_Store
- Supplementary_Material_Paper_8745/data/Hamaguchi-BM_tail-1000/test/
- Supplementary_Material_Paper_8745/data/Hamaguchi-BM_tail-1000/test/test-fact.txt
- Supplementary_Material_Paper_8745/data/Hamaguchi-BM_tail-1000/test/.DS_Store
- __MACOSX/Supplementary_Material_Paper_8745/data/Hamaguchi-BM_tail-1000/test/
- __MACOSX/Supplementary_Material_Paper_8745/data/Hamaguchi-BM_tail-1000/test/._.DS_Store
- Supplementary_Material_Paper_8745/data/Hamaguchi-BM_tail-1000/test/test-graph.txt
- Supplementary_Material_Paper_8745/data/Hamaguchi-BM_tail-1000/test/test-random-sample/
- Supplementary_Material_Paper_8745/data/Hamaguchi-BM_tail-1000/test/test-random-sample/test7.txt
- Supplementary_Material_Paper_8745/data/Hamaguchi-BM_tail-1000/test/test-random-sample/test6.txt
- Supplementary_Material_Paper_8745/data/Hamaguchi-BM_tail-1000/test/test-random-sample/test4.txt
- Supplementary_Material_Paper_8745/data/Hamaguchi-BM_tail-1000/test/test-random-sample/test5.txt
- Supplementary_Material_Paper_8745/data/Hamaguchi-BM_tail-1000/test/test-random-sample/test1.txt
- Supplementary_Material_Paper_8745/data/Hamaguchi-BM_tail-1000/test/test-random-sample/test0.txt
- Supplementary_Material_Paper_8745/data/Hamaguchi-BM_tail-1000/test/test-random-sample/test2.txt
- Supplementary_Material_Paper_8745/data/Hamaguchi-BM_tail-1000/test/test-random-sample/test3.txt
- Supplementary_Material_Paper_8745/data/Hamaguchi-BM_tail-1000/test/test-random-sample/test8.txt
- Supplementary_Material_Paper_8745/data/Hamaguchi-BM_tail-1000/test/test-random-sample/test9.txt
- Supplementary_Material_Paper_8745/data/Hamaguchi-BM_tail-1000/train/
- Supplementary_Material_Paper_8745/data/Hamaguchi-BM_tail-1000/train/train.txt
- Supplementary_Material_Paper_8745/data/Hamaguchi-BM_tail-1000/train/valid.txt
- Supplementary_Material_Paper_8745/data/Hamaguchi-BM_both-3000/
- Supplementary_Material_Paper_8745/data/Hamaguchi-BM_both-3000/.DS_Store
- __MACOSX/Supplementary_Material_Paper_8745/data/Hamaguchi-BM_both-3000/
- __MACOSX/Supplementary_Material_Paper_8745/data/Hamaguchi-BM_both-3000/._.DS_Store
- Supplementary_Material_Paper_8745/data/Hamaguchi-BM_both-3000/test/
- Supplementary_Material_Paper_8745/data/Hamaguchi-BM_both-3000/test/test-fact.txt
- Supplementary_Material_Paper_8745/data/Hamaguchi-BM_both-3000/test/.DS_Store
- __MACOSX/Supplementary_Material_Paper_8745/data/Hamaguchi-BM_both-3000/test/
- __MACOSX/Supplementary_Material_Paper_8745/data/Hamaguchi-BM_both-3000/test/._.DS_Store
- Supplementary_Material_Paper_8745/data/Hamaguchi-BM_both-3000/test/test-graph.txt
- Supplementary_Material_Paper_8745/data/Hamaguchi-BM_both-3000/test/test-random-sample/
- Supplementary_Material_Paper_8745/data/Hamaguchi-BM_both-3000/test/test-random-sample/test7.txt
- Supplementary_Material_Paper_8745/data/Hamaguchi-BM_both-3000/test/test-random-sample/test6.txt
- Supplementary_Material_Paper_8745/data/Hamaguchi-BM_both-3000/test/test-random-sample/test4.txt
- Supplementary_Material_Paper_8745/data/Hamaguchi-BM_both-3000/test/test-random-sample/test5.txt
- Supplementary_Material_Paper_8745/data/Hamaguchi-BM_both-3000/test/test-random-sample/test1.txt
- Supplementary_Material_Paper_8745/data/Hamaguchi-BM_both-3000/test/test-random-sample/test0.txt
- Supplementary_Material_Paper_8745/data/Hamaguchi-BM_both-3000/test/test-random-sample/test2.txt
- Supplementary_Material_Paper_8745/data/Hamaguchi-BM_both-3000/test/test-random-sample/test3.txt
- Supplementary_Material_Paper_8745/data/Hamaguchi-BM_both-3000/test/test-random-sample/test8.txt
- Supplementary_Material_Paper_8745/data/Hamaguchi-BM_both-3000/test/test-random-sample/test9.txt
- Supplementary_Material_Paper_8745/data/Hamaguchi-BM_both-3000/train/
- Supplementary_Material_Paper_8745/data/Hamaguchi-BM_both-3000/train/train.txt
- Supplementary_Material_Paper_8745/data/Hamaguchi-BM_both-3000/train/valid.txt
- Supplementary_Material_Paper_8745/data/Hamaguchi-BM_head-1000/
- Supplementary_Material_Paper_8745/data/Hamaguchi-BM_head-1000/.DS_Store
- __MACOSX/Supplementary_Material_Paper_8745/data/Hamaguchi-BM_head-1000/
- __MACOSX/Supplementary_Material_Paper_8745/data/Hamaguchi-BM_head-1000/._.DS_Store
- Supplementary_Material_Paper_8745/data/Hamaguchi-BM_head-1000/test/
- Supplementary_Material_Paper_8745/data/Hamaguchi-BM_head-1000/test/test-fact.txt
- Supplementary_Material_Paper_8745/data/Hamaguchi-BM_head-1000/test/.DS_Store
- __MACOSX/Supplementary_Material_Paper_8745/data/Hamaguchi-BM_head-1000/test/
- __MACOSX/Supplementary_Material_Paper_8745/data/Hamaguchi-BM_head-1000/test/._.DS_Store
- Supplementary_Material_Paper_8745/data/Hamaguchi-BM_head-1000/test/test-graph.txt
- Supplementary_Material_Paper_8745/data/Hamaguchi-BM_head-1000/test/test-random-sample/
- Supplementary_Material_Paper_8745/data/Hamaguchi-BM_head-1000/test/test-random-sample/test7.txt
- Supplementary_Material_Paper_8745/data/Hamaguchi-BM_head-1000/test/test-random-sample/test6.txt
- Supplementary_Material_Paper_8745/data/Hamaguchi-BM_head-1000/test/test-random-sample/test4.txt
- Supplementary_Material_Paper_8745/data/Hamaguchi-BM_head-1000/test/test-random-sample/test5.txt
- Supplementary_Material_Paper_8745/data/Hamaguchi-BM_head-1000/test/test-random-sample/.DS_Store
- __MACOSX/Supplementary_Material_Paper_8745/data/Hamaguchi-BM_head-1000/test/test-random-sample/
- __MACOSX/Supplementary_Material_Paper_8745/data/Hamaguchi-BM_head-1000/test/test-random-sample/._.DS_Store
- Supplementary_Material_Paper_8745/data/Hamaguchi-BM_head-1000/test/test-random-sample/test1.txt
- Supplementary_Material_Paper_8745/data/Hamaguchi-BM_head-1000/test/test-random-sample/test0.txt
- Supplementary_Material_Paper_8745/data/Hamaguchi-BM_head-1000/test/test-random-sample/test2.txt
- Supplementary_Material_Paper_8745/data/Hamaguchi-BM_head-1000/test/test-random-sample/test3.txt
- Supplementary_Material_Paper_8745/data/Hamaguchi-BM_head-1000/test/test-random-sample/test8.txt
- Supplementary_Material_Paper_8745/data/Hamaguchi-BM_head-1000/test/test-random-sample/test9.txt
- Supplementary_Material_Paper_8745/data/Hamaguchi-BM_head-1000/train/
- Supplementary_Material_Paper_8745/data/Hamaguchi-BM_head-1000/train/train.txt
- Supplementary_Material_Paper_8745/data/Hamaguchi-BM_head-1000/train/valid.txt
- Supplementary_Material_Paper_8745/data/Hamaguchi-BM_head-1000/.ipynb_checkpoints/
- Supplementary_Material_Paper_8745/data/GraIL-BM_WN18RR_v4/
- Supplementary_Material_Paper_8745/data/GraIL-BM_WN18RR_v4/.DS_Store
- __MACOSX/Supplementary_Material_Paper_8745/data/GraIL-BM_WN18RR_v4/
- __MACOSX/Supplementary_Material_Paper_8745/data/GraIL-BM_WN18RR_v4/._.DS_Store
- Supplementary_Material_Paper_8745/data/GraIL-BM_WN18RR_v4/test/
- Supplementary_Material_Paper_8745/data/GraIL-BM_WN18RR_v4/test/test-fact.txt
- __MACOSX/Supplementary_Material_Paper_8745/data/GraIL-BM_WN18RR_v4/test/
- __MACOSX/Supplementary_Material_Paper_8745/data/GraIL-BM_WN18RR_v4/test/._test-fact.txt
- Supplementary_Material_Paper_8745/data/GraIL-BM_WN18RR_v4/test/.DS_Store
- __MACOSX/Supplementary_Material_Paper_8745/data/GraIL-BM_WN18RR_v4/test/._.DS_Store
- Supplementary_Material_Paper_8745/data/GraIL-BM_WN18RR_v4/test/test-graph.txt
- __MACOSX/Supplementary_Material_Paper_8745/data/GraIL-BM_WN18RR_v4/test/._test-graph.txt
- Supplementary_Material_Paper_8745/data/GraIL-BM_WN18RR_v4/test/test-random-sample/
- Supplementary_Material_Paper_8745/data/GraIL-BM_WN18RR_v4/test/test-random-sample/test7.txt
- Supplementary_Material_Paper_8745/data/GraIL-BM_WN18RR_v4/test/test-random-sample/test6.txt
- Supplementary_Material_Paper_8745/data/GraIL-BM_WN18RR_v4/test/test-random-sample/test4.txt
- Supplementary_Material_Paper_8745/data/GraIL-BM_WN18RR_v4/test/test-random-sample/test5.txt
- Supplementary_Material_Paper_8745/data/GraIL-BM_WN18RR_v4/test/test-random-sample/test1.txt
- Supplementary_Material_Paper_8745/data/GraIL-BM_WN18RR_v4/test/test-random-sample/test0.txt
- Supplementary_Material_Paper_8745/data/GraIL-BM_WN18RR_v4/test/test-random-sample/test2.txt
- Supplementary_Material_Paper_8745/data/GraIL-BM_WN18RR_v4/test/test-random-sample/test3.txt
- Supplementary_Material_Paper_8745/data/GraIL-BM_WN18RR_v4/test/test-random-sample/test8.txt
- Supplementary_Material_Paper_8745/data/GraIL-BM_WN18RR_v4/test/test-random-sample/test9.txt
- Supplementary_Material_Paper_8745/data/GraIL-BM_WN18RR_v4/test/.ipynb_checkpoints/
- Supplementary_Material_Paper_8745/data/GraIL-BM_WN18RR_v4/train/
- Supplementary_Material_Paper_8745/data/GraIL-BM_WN18RR_v4/train/train.txt
- __MACOSX/Supplementary_Material_Paper_8745/data/GraIL-BM_WN18RR_v4/train/
- __MACOSX/Supplementary_Material_Paper_8745/data/GraIL-BM_WN18RR_v4/train/._train.txt
- Supplementary_Material_Paper_8745/data/GraIL-BM_WN18RR_v4/train/valid.txt
- __MACOSX/Supplementary_Material_Paper_8745/data/GraIL-BM_WN18RR_v4/train/._valid.txt
- Supplementary_Material_Paper_8745/data/GraIL-BM_WN18RR_v4/.ipynb_checkpoints/
- Supplementary_Material_Paper_8745/data/GraIL-BM_WN18RR_v3/
[truncated: 9,700 more entries]
