# Supplementary material
Source: ML conference proceedings conference paper supplement (https://proceedings.neurips.cc/paper_files/paper/2021/hash/0fd600c953cde8121262e322ef09f70e-Abstract.html)
Supplement: Supplementary file 1 [file 0fd600c953cde8121262e322ef09f70e-Supplemental.zip › Supplementary_Material_Paper_8745/data/GraIL-BM_fb237_v2/test/test-fact.txt]

/m/021_rm	/award/award_winner/awards_won./award/award_honor/award_winner	/m/02p_ycc
/m/02rb84n	/film/film/production_companies	/m/030_1_
/m/02lnbg	/music/genre/artists	/m/0bqsy
/m/01n3bm	/people/cause_of_death/people	/m/031y07
/m/0gr0m	/award/award_category/nominees./award/award_nomination/nominated_for	/m/0bcp9b
/m/01zwy	/people/person/places_lived./people/place_lived/location	/m/03v_5
/m/02cq61	/education/educational_degree/people_with_this_degree./education/education/institution	/m/07szy
/m/01sb5r	/people/person/profession	/m/09jwl
/m/0272vm	/soccer/football_team/current_roster./soccer/football_roster_position/position	/m/02_j1w
/m/016xh5	/people/person/spouse_s./people/marriage/spouse	/m/01pnn3
/m/0jtg0	/music/performance_role/regular_performances./music/group_membership/role	/m/01vj9c
/m/0c921	/award/award_winner/awards_won./award/award_honor/award_winner	/m/06l6nj
/m/02cx90	/people/person/profession	/m/09jwl
/m/035yn8	/film/film/release_date_s./film/film_regional_release_date/film_release_region	/m/03h64
/m/0c11mj	/soccer/football_player/current_team./sports/sports_team_roster/team	/m/05511w
/m/056878	/award/award_ceremony/awards_presented./award/award_honor/award_winner	/m/02l840
/m/02822	/education/field_of_study/students_majoring./education/education/student	/m/0c3p7
/m/02vz6dn	/film/film/release_date_s./film/film_regional_release_date/film_release_region	/m/03rjj
/m/0lkr7	/film/actor/film./film/performance/film	/m/024mpp
/m/03qbnj	/award/award_category/winners./award/award_honor/award_winner	/m/01wdqrx
/m/01gqfm	/olympics/olympic_sport/athletes./olympics/olympic_athlete_affiliation/country	/m/05r4w
/m/0170s4	/base/popstra/celebrity/dated./base/popstra/dated/participant	/m/0c3p7
/m/02j3d4	/award/award_winner/awards_won./award/award_honor/award_winner	/m/011zf2
/m/0f4m2z	/film/film/release_date_s./film/film_regional_release_date/film_release_region	/m/06mkj
/m/0k4f3	/film/film/produced_by	/m/0c921
/m/02v0ff	/people/person/profession	/m/0cbd2
/m/02_j1w	/sports/sports_position/players./sports/sports_team_roster/team	/m/03h0k1
/m/02lfp4	/award/award_nominee/award_nominations./award/award_nomination/award_nominee	/m/01pbwwl
/m/0gbfn9	/film/film/release_date_s./film/film_regional_release_date/film_release_region	/m/05r4w
/m/048cl	/people/person/nationality	/m/0345h
/m/02vjp3	/film/film/country	/m/03rjj
/m/02pt6k_	/people/person/place_of_birth	/m/06wxw
/m/033tf_	/people/ethnicity/people	/m/04xhwn
/m/03_wvl	/award/award_winner/awards_won./award/award_honor/award_winner	/m/03_wtr
/m/03c7ln	/music/group_member/membership./music/group_membership/group	/m/0khth
/m/013q07	/film/film/language	/m/03_9r
/m/0fdys	/education/field_of_study/students_majoring./education/education/student	/m/0n6f8
/m/02lnbg	/music/genre/artists	/m/01vtj38
/m/0208wk	/award/award_category/disciplines_or_subjects	/m/02xlf
/m/0qpjt	/location/hud_county_place/county	/m/0m27n
/m/03qmx_f	/people/person/nationality	/m/06q1r
/m/01vj9c	/music/performance_role/regular_performances./music/group_membership/group	/m/079kr
/m/015l4k	/olympics/olympic_games/sports	/m/09_94
/m/046m59	/award/award_nominee/award_nominations./award/award_nomination/award_nominee	/m/016kft
/m/0nk72	/influence/influence_node/influenced_by	/m/03sbs
/m/0gq_v	/award/award_category/nominees./award/award_nomination/nominated_for	/m/017gm7
/m/0582cf	/film/actor/film./film/performance/film	/m/02qhqz4
/m/02vxn	/education/field_of_study/students_majoring./education/education/major_field_of_study	/m/05qdh
/m/02py8_w	/sports/sports_team/colors	/m/0jc_p
/m/02x1dht	/award/award_category/nominees./award/award_nomination/nominated_for	/m/02rn00y
/m/07r_dg	/film/actor/film./film/performance/film	/m/091rc5
/m/03c602	/music/artist/origin	/m/056_y
/m/03_wvl	/award/award_winner/awards_won./award/award_honor/award_winner	/m/01sl1q
/m/043vc	/sports/professional_sports_team/draft_picks./sports/sports_league_draft_pick/draft	/m/092j54
/m/02_j1w	/sports/sports_position/players./sports/sports_team_roster/team	/m/04knvh
/m/0ws7	/sports/sports_team/roster./american_football/football_historical_roster_position/position_s	/m/01_9c1
/m/01kws3	/tv/tv_producer/programs_produced./tv/tv_producer_term/program	/m/0kfpm
/m/0237fw	/base/popstra/celebrity/breakup./base/popstra/breakup/participant	/m/01z0rcq
/m/02py8_w	/sports/sports_team/colors	/m/01g5v
/m/0gq_v	/award/award_category/nominees./award/award_nomination/nominated_for	/m/09gq0x5
/m/07l50vn	/film/film/release_date_s./film/film_regional_release_date/film_release_region	/m/03gj2
/m/09rx7tx	/film/film/personal_appearances./film/personal_film_appearance/person	/m/02m3sd
/m/026t6	/music/performance_role/track_performances./music/track_contribution/role	/m/07y_7
/m/01bns_	/music/performance_role/track_performances./music/track_contribution/role	/m/026t6
/m/0bjrnt	/education/educational_degree/people_with_this_degree./education/education/major_field_of_study	/m/05qjt
/m/03_wvl	/award/award_nominee/award_nominations./award/award_nomination/award_nominee	/m/01sl1q
/m/0345h	/media_common/netflix_genre/titles	/m/085ccd
/m/015g28	/film/film/language	/m/04306rv
/m/03bwzr4	/education/educational_degree/people_with_this_degree./education/education/major_field_of_study	/m/02_7t
/m/011k_j	/music/instrument/family	/m/026t6
/m/060bp	/government/government_office_category/officeholders./government/government_position_held/jurisdiction_of_office	/m/01n8qg
/m/01k70_	/award/award_winner/awards_won./award/award_honor/award_winner	/m/02qssrm
/m/0yfvf	/location/location/time_zones	/m/02hcv8
/m/021y7yw	/award/award_winning_work/awards_won./award/award_honor/award	/m/0fq9zdn
/m/06q07	/base/schemastaging/organization_extra/phone_number./base/schemastaging/phone_sandbox/service_language	/m/03_9r
/m/019f4v	/award/award_category/nominees./award/award_nomination/nominated_for	/m/011ycb
/m/0f4m2z	/film/film/release_date_s./film/film_regional_release_date/film_release_region	/m/03rjj
/m/0gq_d	/award/award_category/winners./award/award_honor/ceremony	/m/02jp5r
/m/0cc56	/location/location/adjoin_s./location/adjoining_relationship/adjoins	/m/02m4d
/m/0525b	/award/award_nominee/award_nominations./award/award_nomination/award_nominee	/m/05dbf
/m/0d500h	/people/person/places_lived./people/place_lived/location	/m/0cc56
/m/046m59	/film/actor/film./film/performance/film	/m/07gp9
/m/019f4v	/award/award_category/nominees./award/award_nomination/nominated_for	/m/035yn8
/m/0htww	/film/film/release_date_s./film/film_regional_release_date/film_release_region	/m/03rjj
/m/0ddkf	/people/person/places_lived./people/place_lived/location	/m/0ccvx
/m/0bjrnt	/education/educational_degree/people_with_this_degree./education/education/institution	/m/0177sq
/m/0fbw6	/food/food/nutrients./food/nutrition_fact/nutrient	/m/05wvs
/m/01mk6	/organization/organization_member/member_of./organization/organization_membership/organization	/m/04k4l
/m/0by1wkq	/film/film/release_date_s./film/film_regional_release_date/film_release_region	/m/03gj2
/m/0c6g1l	/film/actor/film./film/performance/film	/m/08phg9
/m/0bjkpt	/award/award_nominee/award_nominations./award/award_nomination/nominated_for	/m/03mh94
/m/08b0cj	/sports/pro_athlete/teams./sports/sports_team_roster/team	/m/03h0k1
/m/01f_mw	/film/film_distributor/films_distributed./film/film_film_distributor_relationship/film	/m/0y_9q
/m/011k_j	/music/performance_role/guest_performances./music/recording_contribution/performance_role	/m/026t6
/m/0gq9h	/award/award_category/winners./award/award_honor/award_winner	/m/04wvhz
/m/057lbk	/film/film/other_crew./film/film_crew_gig/film_crew_role	/m/033smt
/m/02qssrm	/award/award_nominee/award_nominations./award/award_nomination/award_nominee	/m/01k70_
/m/07xl34	/organization/role/leaders./organization/leadership/organization	/m/031hxk
/m/0gq9h	/award/award_category/nominees./award/award_nomination/nominated_for	/m/02rn00y
/m/05kkh	/location/statistical_region/religions./location/religion_percentage/religion	/m/051kv
/m/011k_j	/music/performance_role/regular_performances./music/group_membership/role	/m/03bx0bm
/m/058z1hb	/award/award_nominee/award_nominations./award/award_nomination/award	/m/0gq_v
/m/0bvzp	/award/award_nominee/award_nominations./award/award_nomination/award	/m/02581c
/m/0187y5	/base/popstra/celebrity/dated./base/popstra/dated/participant	/m/0cbkc
/m/017s11	/award/award_nominee/award_nominations./award/award_nomination/award	/m/0gq_d
/m/05zvj3m	/award/award_category/nominees./award/award_nomination/nominated_for	/m/01k0vq
/m/03q5t	/music/performance_role/track_performances./music/track_contribution/role	/m/07y_7
/m/03_gz8	/film/film/genre	/m/02p0szs
/m/0bh8tgs	/film/film/release_date_s./film/film_regional_release_date/film_release_region	/m/06mkj
/m/0h0jz	/film/actor/film./film/performance/film	/m/03x7hd
/m/033tf_	/people/ethnicity/people	/m/0h1mt
/m/07gp9	/film/film/featured_film_locations	/m/0q_xk
/m/03dj48	/base/x2010fifaworldcupsouthafrica/world_cup_squad/current_world_cup_squad./base/x2010fifaworldcupsouthafrica/current_world_cup_squad/current_club	/m/0hvgt
/m/01vsps	/people/person/place_of_birth	/m/096gm
/m/07vyf	/education/educational_institution/students_graduates./education/education/major_field_of_study	/m/02_7t
/m/099c8n	/award/award_category/nominees./award/award_nomination/nominated_for	/m/05jzt3
/m/01p1z_	/award/award_nominee/award_nominations./award/award_nomination/award	/m/0gqy2
/m/017m2y	/base/popstra/celebrity/friendship./base/popstra/friendship/participant	/m/0zjpz
/m/078lk	/location/administrative_division/first_level_division_of	/m/03rjj
/m/03ym1	/award/award_nominee/award_nominations./award/award_nomination/award	/m/099ck7
/m/026bt_h	/sports/sports_team/roster./american_football/football_historical_roster_position/position_s	/m/05fyy5
/m/0fp_xp	/sports/pro_athlete/teams./sports/sports_team_roster/team	/m/02b10w
/m/0459q4	/language/human_language/countries_spoken_in	/m/03h64
/m/042xh	/people/person/profession	/m/0cbd2
/m/011j5x	/music/genre/artists	/m/01wgjj5
/m/0418154	/award/award_ceremony/awards_presented./award/award_honor/honored_for	/m/02pjc1h
/m/02tk74	/people/person/place_of_birth	/m/04jpl
/m/033gn8	/education/educational_institution/students_graduates./education/education/student	/m/02661h
/m/024fz9	/award/award_category/winners./award/award_honor/award_winner	/m/0p7h7
/m/02_j1w	/sports/sports_position/players./sports/sports_team_roster/team	/m/045346
/m/02v0ff	/award/award_winner/awards_won./award/award_honor/award_winner	/m/02qssrm
/m/076psv	/award/award_nominee/award_nominations./award/award_nomination/nominated_for	/m/0kvb6p
/m/03rbzn	/olympics/olympic_sport/athletes./olympics/olympic_athlete_affiliation/country	/m/0345h
/m/02mxw0	/award/award_nominee/award_nominations./award/award_nomination/award	/m/0bdwqv
/m/02jxkw	/people/person/places_lived./people/place_lived/location	/m/0xl08
/m/033tf_	/people/ethnicity/people	/m/03x16f
/m/057lbk	/film/film/genre	/m/01hmnh
/m/016_mj	/film/actor/film./film/performance/film	/m/0p9lw
/m/05_6_y	/soccer/football_player/current_team./sports/sports_team_roster/team	/m/0272vm
/m/0k7tq	/film/film/release_date_s./film/film_regional_release_date/film_release_region	/m/05r4w
/m/0dlhg	/location/location/time_zones	/m/02hcv8
/m/0ft18	/film/film/genre	/m/082gq
/m/015g28	/award/award_winning_work/awards_won./award/award_honor/award_winner	/m/025y9fn
/m/02g_6j	/sports/sports_position/players./sports/sports_team_roster/team	/m/025v1sx
/m/0gq_d	/award/award_category/winners./award/award_honor/ceremony	/m/0fzrhn
/m/01vt5c_	/people/person/places_lived./people/place_lived/location	/m/04jpl
/m/0gq9h	/award/award_category/nominees./award/award_nomination/nominated_for	/m/0hv81
/m/03__77	/soccer/football_team/current_roster./sports/sports_team_roster/position	/m/02_j1w
/m/025y9fn	/award/award_nominee/award_nominations./award/award_nomination/award_nominee	/m/07lwsz
/m/0h1n9	/medicine/disease/risk_factors	/m/02ctzb
/m/04rsd2	/award/award_nominee/award_nominations./award/award_nomination/award_nominee	/m/016xh5
/m/01hmnh	/media_common/netflix_genre/titles	/m/0d4htf
/m/09b0xs	/tv/tv_writer/tv_programs./tv/tv_program_writer_relationship/tv_program	/m/0vhm
/m/04hk0w	/film/film/language	/m/01jb8r
/m/0bh8tgs	/film/film/other_crew./film/film_crew_gig/film_crew_role	/m/01xy5l_
/m/02dlh2	/music/performance_role/track_performances./music/track_contribution/role	/m/026t6
/m/0n5jm	/location/location/adjoin_s./location/adjoining_relationship/adjoins	/m/0mwxz
/m/06bng	/award/award_nominee/award_nominations./award/award_nomination/award	/m/0265vt
/m/05zvj3m	/award/award_category/winners./award/award_honor/award_winner	/m/0n6f8
/m/04wvhz	/award/award_winner/awards_won./award/award_honor/award_winner	/m/07lwsz
/m/08wq0g	/award/award_nominee/award_nominations./award/award_nomination/award_nominee	/m/0bt7ws
/m/0m_v0	/award/award_winner/awards_won./award/award_honor/award_winner	/m/02cx90
/m/0gqy2	/award/award_category/nominees./award/award_nomination/nominated_for	/m/0jz71
/m/01wdqrx	/award/award_winner/awards_won./award/award_honor/award_winner	/m/01s21dg
/m/07y_7	/music/instrument/instrumentalists	/m/01tp5bj
/m/02vy5j	/award/award_nominee/award_nominations./award/award_nomination/nominated_for	/m/09cr8
/m/0t_hx	/location/location/time_zones	/m/02hcv8
/m/099c8n	/award/award_category/nominees./award/award_nomination/nominated_for	/m/09k56b7
/m/0ljbg	/sports/sports_team/colors	/m/01g5v
/m/0gh65c5	/film/film/release_date_s./film/film_regional_release_date/film_release_region	/m/03rt9
/m/0l14j_	/music/performance_role/regular_performances./music/group_membership/role	/m/02fsn
/m/0gq_v	/award/award_category/nominees./award/award_nomination/nominated_for	/m/083skw
/m/02dlh2	/music/performance_role/guest_performances./music/recording_contribution/performance_role	/m/0l14j_
/m/01vv6xv	/people/person/profession	/m/0dz3r
/m/02b1gz	/soccer/football_team/current_roster./soccer/football_roster_position/position	/m/02_j1w
/m/0cq7kw	/film/film/written_by	/m/012wg
/m/02cx90	/award/award_nominee/award_nominations./award/award_nomination/award_nominee	/m/011zf2
/m/0vhm	/award/award_winning_work/awards_won./award/award_honor/award_winner	/m/09b0xs
/m/024n3z	/award/award_nominee/award_nominations./award/award_nomination/award_nominee	/m/03ym1
/m/01l03w2	/award/award_nominee/award_nominations./award/award_nomination/award_nominee	/m/01k5t_3
/m/0hskw	/award/award_nominee/award_nominations./award/award_nomination/award	/m/0gq9h
/m/03n3gl	/film/film/genre	/m/05mrx8
/m/050ks	/location/location/contains	/m/0172jm
/m/035l_9	/sports/sports_team/colors	/m/01g5v
/m/02lf1j	/people/person/places_lived./people/place_lived/location	/m/0d6lp
/m/0gqy2	/award/award_category/winners./award/award_honor/ceremony	/m/0bzmt8
/m/05qdh	/education/field_of_study/students_majoring./education/education/major_field_of_study	/m/02822
/m/04btyz	/media_common/netflix_genre/titles	/m/0bxsk
/m/0bbf1f	/film/actor/film./film/performance/film	/m/0ch3qr1
/m/02vp1f_	/film/film/genre	/m/01hmnh
/m/01s21dg	/people/person/profession	/m/01xy5l_
/m/02tk74	/people/person/places_lived./people/place_lived/location	/m/04jpl
/m/0gq9h	/award/award_category/nominees./award/award_nomination/nominated_for	/m/08xvpn
/m/06r_by	/people/person/profession	/m/0dgd_
/m/0gr0m	/award/award_category/winners./award/award_honor/award_winner	/m/06hzsx
/m/026t6	/music/performance_role/track_performances./music/track_contribution/role	/m/02fsn
/m/0h95927	/film/film/release_date_s./film/film_regional_release_date/film_release_region	/m/06mkj
/m/0fzrhn	/award/award_ceremony/awards_presented./award/award_honor/award_winner	/m/0c6g29
/m/0372kf	/people/person/religion	/m/051kv
/m/053yx	/award/award_nominee/award_nominations./award/award_nomination/award	/m/02tj96
/m/0gj50	/award/award_winning_work/awards_won./award/award_honor/award	/m/02pz3j5
/m/018d6l	/people/person/profession	/m/09jwl
/m/02p_ycc	/award/award_winner/awards_won./award/award_honor/award_winner	/m/021_rm
/m/0gj8nq2	/film/film/release_date_s./film/film_regional_release_date/film_release_region	/m/03h2c
/m/017s11	/film/film_distributor/films_distributed./film/film_film_distributor_relationship/film	/m/021pqy
/m/04lqvlr	/film/film/country	/m/03rjj
/m/02fsn	/music/performance_role/track_performances./music/track_contribution/role	/m/0dwt5
/m/03rbzn	/olympics/olympic_sport/athletes./olympics/olympic_athlete_affiliation/country	/m/05r4w
/m/01k8q5	/education/university/international_tuition./measurement_unit/dated_money_value/currency	/m/01nv4h
/m/0dwt5	/music/performance_role/regular_performances./music/group_membership/role	/m/03q5t
/m/026mj	/location/location/time_zones	/m/02hcv8
/m/02dlh2	/music/performance_role/regular_performances./music/group_membership/role	/m/0l14j_
/m/0486tv	/olympics/olympic_sport/athletes./olympics/olympic_athlete_affiliation/country	/m/0j1z8
/m/0d68qy	/tv/tv_program/genre	/m/06nbt
/m/028d4v	/award/award_nominee/award_nominations./award/award_nomination/award_nominee	/m/073749
/m/07mz77	/people/person/nationality	/m/0345h
/m/0kzy0	/award/award_nominee/award_nominations./award/award_nomination/award	/m/03qbnj
/m/04x1_w	/film/actor/film./film/performance/film	/m/03bx2lk
/m/015pxr	/award/award_nominee/award_nominations./award/award_nomination/award	/m/0bdwqv
/m/03qnvdl	/film/film/release_date_s./film/film_regional_release_date/film_release_region	/m/05sb1
/m/05dss7	/film/film/other_crew./film/film_crew_gig/crewmember	/m/02xc1w4
/m/02_hj4	/award/award_winner/awards_won./award/award_honor/award_winner	/m/06lvlf
/m/0gtvrv3	/film/film/release_date_s./film/film_regional_release_date/film_release_region	/m/03h64
/m/08phg9	/award/award_winning_work/awards_won./award/award_honor/award_winner	/m/024n3z
/m/01g4yw	/education/university/international_tuition./measurement_unit/dated_money_value/currency	/m/01nv4h
/m/018yj6	/people/person/profession	/m/0cbd2
/m/01s1zk	/people/person/profession	/m/0dz3r
/m/0gjc4d3	/film/film/release_date_s./film/film_regional_release_date/film_release_region	/m/03h64
/m/02v0ff	/award/award_winner/awards_won./award/award_honor/award_winner	/m/06jvj7
/m/092c5f	/award/award_ceremony/awards_presented./award/award_honor/award_winner	/m/02661h
/m/02w9sd7	/award/award_category/nominees./award/award_nomination/nominated_for	/m/04q01mn
/m/06jnvs	/tv/tv_producer/programs_produced./tv/tv_producer_term/program	/m/0557yqh
/m/0gr0m	/award/award_category/nominees./award/award_nomination/nominated_for	/m/02rb607
/m/03078l	/soccer/football_team/current_roster./soccer/football_roster_position/position	/m/02_j1w
/m/070w7s	/award/award_nominee/award_nominations./award/award_nomination/nominated_for	/m/0gj50
/m/09fb5	/film/actor/film./film/performance/film	/m/04jpk2
/m/0f40w	/award/award_nominated_work/award_nominations./award/award_nomination/nominated_for	/m/02725hs
/m/0mx6c	/location/location/time_zones	/m/02lcqs
/m/02j8nx	/people/person/profession	/m/0cbd2
/m/0c_dx	/award/award_category/winners./award/award_honor/award_winner	/m/073v6
/m/06jnvs	/people/person/profession	/m/0cbd2
/m/07lwsz	/award/award_winner/awards_won./award/award_honor/award_winner	/m/04wvhz
/m/02_p8v	/award/award_nominee/award_nominations./award/award_nomination/nominated_for	/m/026zlh9
/m/0c921	/award/award_nominee/award_nominations./award/award_nomination/nominated_for	/m/0k4f3
/m/07s6fsf	/education/educational_degree/people_with_this_degree./education/education/institution	/m/03ksy
/m/01hmnh	/media_common/netflix_genre/titles	/m/0bl3nn
/m/02cx90	/award/award_nominee/award_nominations./award/award_nomination/award_nominee	/m/01m15br
/m/037w7r	/film/actor/film./film/performance/film	/m/02vr3gz
/m/04svwx	/tv/tv_program/languages	/m/03_9r
/m/02jp5r	/award/award_ceremony/awards_presented./award/award_honor/award_winner	/m/0c4f4
/m/03rjj	/media_common/netflix_genre/titles	/m/02psgq
/m/02w9sd7	/award/award_category/winners./award/award_honor/award_winner	/m/016yvw
/m/0gs1_	/award/award_nominee/award_nominations./award/award_nomination/award	/m/019f4v
/m/017gm7	/film/film/release_date_s./film/film_regional_release_date/film_release_region	/m/03rt9
/m/02q52q	/award/ranked_item/appears_in_ranked_lists./award/ranking/list	/m/05glt
/m/0d6lp	/sports/sports_team_location/teams	/m/06rny
/m/01w92	/organization/organization/headquarters./location/mailing_address/citytown	/m/04jpl
/m/0jtg0	/music/performance_role/regular_performances./music/group_membership/role	/m/03bx0bm
/m/06jnvs	/award/award_nominee/award_nominations./award/award_nomination/award	/m/0cjyzs
/m/01q7cb_	/base/popstra/celebrity/canoodled./base/popstra/canoodled/participant	/m/0c3jz
/m/024n3z	/award/award_nominee/award_nominations./award/award_nomination/award_nominee	/m/0c6g1l
/m/01nd2c	/soccer/football_team/current_roster./soccer/football_roster_position/position	/m/02_j1w
/m/02yxh9	/award/award_ceremony/awards_presented./award/award_honor/honored_for	/m/011yl_
/m/02661h	/people/person/places_lived./people/place_lived/location	/m/01fscv
/m/0fb1q	/people/person/places_lived./people/place_lived/location	/m/0cc56
/m/011k_j	/music/performance_role/guest_performances./music/recording_contribution/performance_role	/m/02dlh2
/m/03q5t	/music/performance_role/track_performances./music/track_contribution/role	/m/02fsn
/m/0gh65c5	/film/film/release_date_s./film/film_regional_release_date/film_release_region	/m/03rjj
/m/03k0yw	/music/artist/track_contributions./music/track_contribution/role	/m/0979zs
/m/0639bg	/award/award_winning_work/awards_won./award/award_honor/award	/m/02x1z2s
/m/026n998	/award/award_nominee/award_nominations./award/award_nomination/award_nominee	/m/08w6v_
/m/0584r4	/tv/tv_program/genre	/m/06nbt
/m/0ptxj	/award/award_winning_work/awards_won./award/award_honor/award	/m/0gr0m
/m/02lnbg	/music/genre/artists	/m/03y82t6
/m/02_j1w	/sports/sports_position/players./sports/sports_team_roster/team	/m/03lygq
/m/05kkh	/location/location/contains	/m/0n1v8
/m/028d4v	/award/award_nominee/award_nominations./award/award_nomination/nominated_for	/m/02ht1k
/m/01fh0q	/music/artist/track_contributions./music/track_contribution/role	/m/01vj9c
/m/02g0rb	/people/person/spouse_s./people/marriage/location_of_ceremony	/m/04jpl
/m/062zm5h	/film/film/release_date_s./film/film_regional_release_date/film_release_region	/m/0345_
/m/0hfzr	/film/film/language	/m/04306rv
/m/0hz_1	/award/award_nominee/award_nominations./award/award_nomination/nominated_for	/m/030k94
/m/04kny3	/soccer/football_team/current_roster./soccer/football_roster_position/position	/m/02_j1w
/m/0bm70b	/award/award_category/winners./award/award_honor/award_winner	/m/0hskw
/m/04jpk2	/film/film/production_companies	/m/017s11
/m/0gtvrv3	/film/film/release_date_s./film/film_regional_release_date/film_release_region	/m/0345h
/m/0979zs	/music/performance_role/track_performances./music/track_contribution/role	/m/0dwt5
/m/03pp73	/award/award_nominee/award_nominations./award/award_nomination/award	/m/0bdwqv
/m/01vsps	/award/award_nominee/award_nominations./award/award_nomination/award	/m/0gq9h
/m/0fvr1	/film/film/genre	/m/01hmnh
/m/0gh65c5	/film/film/release_date_s./film/film_regional_release_date/film_release_region	/m/05r4w
/m/04l19_	/award/award_nominee/award_nominations./award/award_nomination/award	/m/02x73k6
/m/018d6l	/music/artist/contribution./music/recording_contribution/performance_role	/m/03bx0bm
/m/08b0cj	/sports/pro_athlete/teams./sports/sports_team_roster/team	/m/01gjlw
/m/011yqc	/film/film/release_date_s./film/film_regional_release_date/film_release_region	/m/03h64
/m/01vmv_	/education/university/international_tuition./measurement_unit/dated_money_value/currency	/m/01nv4h
/m/01m15br	/award/award_winner/awards_won./award/award_honor/award_winner	/m/02j3d4
/m/02w9sd7	/award/award_category/nominees./award/award_nomination/nominated_for	/m/011yl_
/m/024n3z	/award/award_nominee/award_nominations./award/award_nomination/award_nominee	/m/01846t
/m/01c6l	/award/award_nominee/award_nominations./award/award_nomination/nominated_for	/m/0b2v79
/m/03j43	/influence/influence_node/influenced_by	/m/0mj0c
/m/0kzy0	/people/person/profession	/m/0dz3r
/m/0zm1	/people/person/profession	/m/0cbd2
/m/01_9c1	/sports/sports_position/players./sports/sports_team_roster/team	/m/06rpd
/m/012x4t	/celebrities/celebrity/celebrity_friends./celebrities/friendship/friend	/m/0grwj
/m/0h0jz	/award/award_nominee/award_nominations./award/award_nomination/award	/m/02w9sd7
/m/0htww	/film/film/release_date_s./film/film_regional_release_date/film_release_region	/m/06mkj
/m/07y_7	/music/performance_role/regular_performances./music/group_membership/role	/m/03bx0bm
/m/083p7	/people/person/profession	/m/04gc2
/m/02w9sd7	/award/award_category/nominees./award/award_nomination/nominated_for	/m/0f4vx
/m/0192hw	/film/film/release_date_s./film/film_regional_release_date/film_release_region	/m/05r4w
/m/06jw0s	/award/award_winner/awards_won./award/award_honor/award_winner	/m/01k70_
/m/01wdqrx	/people/person/profession	/m/04f2zj
/m/06q1r	/location/statistical_region/places_exported_to./location/imports_and_exports/exported_to	/m/03rt9
/m/0g1rw	/film/film_distributor/films_distributed./film/film_film_distributor_relationship/film	/m/026zlh9
/m/02mxw0	/film/actor/film./film/performance/film	/m/0b4lkx
/m/06l6nj	/people/person/profession	/m/0cbd2
/m/02tr7d	/award/award_nominee/award_nominations./award/award_nomination/award_nominee	/m/0170s4
/m/014gjp	/tv/tv_program/genre	/m/0c4xc
/m/0kzy0	/influence/influence_node/influenced_by	/m/0gt_k
/m/02tr7d	/award/award_winner/awards_won./award/award_honor/award_winner	/m/0cjsxp
/m/0hvgt	/soccer/football_team/current_roster./soccer/football_roster_position/position	/m/02_j1w
/m/07s6fsf	/education/educational_degree/people_with_this_degree./education/education/institution	/m/015cz0
/m/02tk74	/award/award_nominee/award_nominations./award/award_nomination/award	/m/0fq9zdn
/m/03bx0bm	/music/performance_role/regular_performances./music/group_membership/role	/m/0j862
/m/01hqk	/film/film/music	/m/07j8kh
/m/015qsq	/film/film/featured_film_locations	/m/02nd_
/m/014kkm	/award/award_winning_work/awards_won./award/award_honor/award	/m/0gr0m
/m/02vy5j	/people/person/spouse_s./people/marriage/spouse	/m/02g0rb
/m/04l19_	/film/actor/film./film/performance/film	/m/043tz0c
/m/01z_g6	/award/award_nominee/award_nominations./award/award_nomination/award_nominee	/m/03kcyd
/m/06jnvs	/award/award_nominee/award_nominations./award/award_nomination/award_nominee	/m/0bczgm
/m/0bg539	/award/award_nominee/award_nominations./award/award_nomination/award	/m/0cjyzs
/m/01lj_c	/award/award_category/winners./award/award_honor/ceremony	/m/0ds460j
/m/07c0j	/award/award_nominee/award_nominations./award/award_nomination/award	/m/03qbnj
/m/02_j1w	/sports/sports_position/players./sports/sports_team_roster/team	/m/09xb4h
/m/01v9l67	/award/award_nominee/award_nominations./award/award_nomination/nominated_for	/m/017gm7
/m/03sbs	/user/alexander/philosophy/philosopher/interests	/m/04s0m
/m/017vkx	/people/person/profession	/m/09jwl
/m/03n69x	/sports/pro_athlete/teams./sports/sports_team_roster/team	/m/0cqt41
/m/043vc	/sports/sports_team/roster./american_football/football_historical_roster_position/position_s	/m/02g_6j
/m/02x4w6g	/award/award_category/winners./award/award_honor/award_winner	/m/026r8q
/m/0275_pj	/award/award_nominee/award_nominations./award/award_nomination/award_nominee	/m/070w7s
/m/017s11	/film/film_distributor/films_distributed./film/film_film_distributor_relationship/film	/m/04cv9m
/m/031y07	/award/award_nominee/award_nominations./award/award_nomination/nominated_for	/m/02bg8v
/m/0c6g1l	/award/award_nominee/award_nominations./award/award_nomination/award_nominee	/m/024n3z
/m/026t6	/music/performance_role/track_performances./music/track_contribution/role	/m/01bns_
/m/0bl3nn	/film/film/genre	/m/01hmnh
/m/05yjhm	/people/person/places_lived./people/place_lived/location	/m/013h9
/m/04lhc4	/award/award_nominated_work/award_nominations./award/award_nomination/nominated_for	/m/09cr8
/m/03ym1	/film/actor/film./film/performance/film	/m/01qb5d
/m/075mb	/base/aareas/schema/administrative_area/administrative_parent	/m/05sb1
/m/0vhm	/tv/tv_program/program_creator	/m/09b0xs
/m/035zr0	/film/film/music	/m/0l12d
/m/0jpn8	/education/university/fraternities_and_sororities	/m/035tlh
/m/011j5x	/music/genre/artists	/m/014pg1
/m/0bjrnt	/education/educational_degree/people_with_this_degree./education/education/institution	/m/08815
/m/07s95_l	/award/award_winner/awards_won./award/award_honor/award_winner	/m/04kr63w
/m/01xllf	/film/actor/film./film/performance/film	/m/0ds5_72
/m/03yk8z	/award/award_nominee/award_nominations./award/award_nomination/nominated_for	/m/09gq0x5
/m/026t6	/music/instrument/instrumentalists	/m/01wp8w7
/m/015l4k	/user/jg/default_domain/olympic_games/sports	/m/06zgc
/m/0ds1glg	/film/film/release_date_s./film/film_regional_release_date/film_release_region	/m/03rt9
/m/02fv3t	/award/award_category/winners./award/award_honor/ceremony	/m/056878
/m/03mkk4	/education/educational_degree/people_with_this_degree./education/education/major_field_of_study	/m/05qdh
/m/0fq27fp	/film/film/release_date_s./film/film_regional_release_date/film_release_region	/m/0345h
/m/04jwly	/award/award_winning_work/awards_won./award/award_honor/award_winner	/m/02d4ct
/m/0glt670	/music/genre/artists	/m/0bqsy
/m/04rsd2	/award/award_nominee/award_nominations./award/award_nomination/award_nominee	/m/0159h6
/m/0lkr7	/award/award_nominee/award_nominations./award/award_nomination/award	/m/0gqy2
/m/03bx0bm	/music/performance_role/regular_performances./music/group_membership/role	/m/02fsn
/m/02j3d4	/award/award_winner/awards_won./award/award_honor/award_winner	/m/02cx90
/m/0dwt5	/music/performance_role/track_performances./music/track_contribution/role	/m/01vj9c
/m/02g_6j	/sports/sports_position/players./sports/sports_team_roster/team	/m/0ws7
/m/06vsbt	/people/person/places_lived./people/place_lived/location	/m/0fpzwf
/m/01dy7j	/award/award_nominee/award_nominations./award/award_nomination/nominated_for	/m/0d68qy
/m/0cjsxp	/award/award_nominee/award_nominations./award/award_nomination/award	/m/02x4w6g
/m/03sbs	/user/alexander/philosophy/philosopher/interests	/m/0x0w
/m/06hzsx	/people/person/profession	/m/0dgd_
/m/032j_n	/film/film_distributor/films_distributed./film/film_film_distributor_relationship/film	/m/0bwhdbl
/m/02pt6k_	/award/award_winner/awards_won./award/award_honor/award_winner	/m/02qssrm
/m/05kjc6	/soccer/football_team/current_roster./soccer/football_roster_position/position	/m/02_j1w
/m/05ns4g	/soccer/football_team/current_roster./soccer/football_roster_position/position	/m/02_j1w
/m/03bwzr4	/education/educational_degree/people_with_this_degree./education/education/institution	/m/015cz0
/m/029h7y	/music/genre/artists	/m/01vt5c_
/m/02x73k6	/award/award_category/nominees./award/award_nomination/nominated_for	/m/01chpn
/m/011zf2	/award/award_winner/awards_won./award/award_honor/award_winner	/m/01m15br
/m/02_j1w	/sports/sports_position/players./sports/sports_team_roster/team	/m/0gfw56
/m/02g3gw	/award/award_category/nominees./award/award_nomination/nominated_for	/m/01hv3t
/m/026t6	/music/instrument/instrumentalists	/m/06cc_1
/m/026t6	/music/performance_role/guest_performances./music/recording_contribution/performance_role	/m/02dlh2
/m/0h95927	/film/film/release_date_s./film/film_regional_release_date/film_release_region	/m/03gj2
/m/0gq9h	/award/award_category/nominees./award/award_nomination/nominated_for	/m/0cq7kw
/m/04969y	/award/award_winning_work/awards_won./award/award_honor/award	/m/03y8cbv
/m/05nwr	/location/administrative_division/first_level_division_of	/m/06q1r
/m/0jgwf	/award/award_nominee/award_nominations./award/award_nomination/nominated_for	/m/0glbqt
/m/09fb5	/people/person/places_lived./people/place_lived/location	/m/0cc56
/m/024fz9	/award/award_category/winners./award/award_honor/award_winner	/m/03h_fk5
/m/0164qt	/film/film/music	/m/02g1jh
/m/02_j1w	/sports/sports_position/players./sports/sports_team_roster/team	/m/01352_
/m/0gtvrv3	/film/film/release_date_s./film/film_regional_release_date/film_release_region	/m/03rjj
/m/02dlh2	/music/instrument/family	/m/026t6
/m/06cgf	/award/ranked_item/appears_in_ranked_lists./award/ranking/list	/m/05glt
/m/0557yqh	/tv/tv_program/genre	/m/0c4xc
/m/02vxn	/education/field_of_study/students_majoring./education/education/major_field_of_study	/m/02822
/m/0cmc2	/base/culturalevent/event/entity_involved	/m/01fmy9
/m/03z9585	/film/film/release_date_s./film/film_regional_release_date/film_release_region	/m/06mkj
/m/0k7tq	/film/film/release_date_s./film/film_regional_release_date/film_release_region	/m/056_y
/m/057bc6m	/award/award_winner/awards_won./award/award_honor/award_winner	/m/076psv
/m/02cx90	/award/award_winner/awards_won./award/award_honor/award_winner	/m/02j3d4
/m/02_j1w	/sports/sports_position/players./sports/sports_team_roster/team	/m/051qvn
/m/023wyl	/sports/sports_position/players./sports/sports_team_roster/team	/m/07kbp5
/m/03bwzr4	/education/educational_degree/people_with_this_degree./education/education/institution	/m/0gjv_
/m/03bwzr4	/education/educational_degree/people_with_this_degree./education/education/institution	/m/03ksy
/m/0192hw	/film/film/featured_film_locations	/m/0qpn9
/m/0275_pj	/award/award_winner/awards_won./award/award_honor/award_winner	/m/070w7s
/m/01r216	/award/award_nominee/award_nominations./award/award_nomination/award_nominee	/m/02j8nx
/m/09byk	/people/person/languages	/m/04306rv
/m/0mwxz	/location/location/adjoin_s./location/adjoining_relationship/adjoins	/m/0mwh1
/m/018x3	/award/award_nominee/award_nominations./award/award_nomination/award_nominee	/m/01wyq0w
/m/0gr0m	/award/award_category/nominees./award/award_nomination/nominated_for	/m/07z6xs
/m/017s11	/award/award_nominee/award_nominations./award/award_nomination/nominated_for	/m/0dc7hc
/m/05pxnmb	/award/award_winning_work/awards_won./award/award_honor/honored_for	/m/0bxxzb
/m/01vrt_c	/base/popstra/celebrity/dated./base/popstra/dated/participant	/m/0127s7
/m/0ptxj	/film/film/produced_by	/m/03s2y9
/m/0gj8nq2	/film/film/release_date_s./film/film_regional_release_date/film_release_region	/m/03rjj
/m/0dd6bf	/film/film/language	/m/03_9r
/m/026t6	/music/performance_role/track_performances./music/track_contribution/role	/m/0979zs
/m/016yvw	/people/person/nationality	/m/03rt9
/m/03mszl	/music/artist/contribution./music/recording_contribution/performance_role	/m/026t6
/m/01_f_5	/award/award_nominee/award_nominations./award/award_nomination/award	/m/02x1dht
/m/034np8	/film/actor/film./film/performance/film	/m/0f40w
/m/01vw_dv	/people/person/profession	/m/0dz3r
/m/08vq2y	/soccer/football_team/current_roster./soccer/football_roster_position/position	/m/02_j1w
/m/05dbf	/base/popstra/celebrity/dated./base/popstra/dated/participant	/m/0lx2l
/m/04mhl	/people/person/profession	/m/0cbd2
/m/03mkk4	/education/educational_degree/people_with_this_degree./education/education/major_field_of_study	/m/040p_q
/m/011yl_	/film/film/featured_film_locations	/m/04jpl
/m/01gtcq	/government/legislative_session/members./government/government_position_held/district_represented	/m/026mj
/m/03fmfs	/education/educational_institution/colors	/m/01g5v
/m/0345h	/location/location/contains	/m/07gdw
/m/07s95_l	/award/award_nominee/award_nominations./award/award_nomination/award_nominee	/m/04kr63w
/m/0j_sncb	/education/educational_institution/students_graduates./education/education/major_field_of_study	/m/0fdys
/m/014gjp	/award/award_winning_work/awards_won./award/award_honor/award_winner	/m/09d5h
/m/050ks	/location/statistical_region/religions./location/religion_percentage/religion	/m/072w0
/m/0bcp9b	/film/film/music	/m/01l3mk3
/m/056rgc	/award/award_nominee/award_nominations./award/award_nomination/award	/m/02x4w6g
/m/0c1d0	/location/capital_of_administrative_division/capital_of./location/administrative_division_capital_relationship/administrative_division	/m/0mw5x
/m/02xb2bt	/people/person/nationality	/m/03rt9
/m/04j_h4	/music/genre/parent_genre	/m/0glt670
/m/0159h6	/award/award_nominee/award_nominations./award/award_nomination/nominated_for	/m/02py4c8
/m/0glt670	/music/genre/artists	/m/01vw_dv
/m/017s11	/award/award_nominee/award_nominations./award/award_nomination/nominated_for	/m/0bxxzb
/m/0fq9zdn	/award/award_category/winners./award/award_honor/award_winner	/m/02d42t
/m/01vksx	/film/film/release_date_s./film/film_regional_release_date/film_release_region	/m/06mkj
/m/019f4v	/award/award_category/nominees./award/award_nomination/nominated_for	/m/09p3_s
/m/017s11	/award/award_nominee/award_nominations./award/award_nomination/nominated_for	/m/02hxhz
/m/07c0j	/award/award_nominee/award_nominations./award/award_nomination/award	/m/01c9jp
/m/06q1r	/location/statistical_region/places_exported_to./location/imports_and_exports/exported_to	/m/03rjj
/m/07h1q	/influence/influence_node/influenced_by	/m/04xm_
/m/0grwj	/people/person/profession	/m/0cbd2
/m/02vkvcz	/people/deceased_person/place_of_death	/m/04jpl
/m/0gq_v	/award/award_category/winners./award/award_honor/ceremony	/m/0bzmt8
/m/0d500h	/award/award_nominee/award_nominations./award/award_nomination/nominated_for	/m/04jwly
/m/03_wtr	/award/award_winner/awards_won./award/award_honor/award_winner	/m/03_wvl
/m/07nf6	/location/location/adjoin_s./location/adjoining_relationship/adjoins	/m/09krp
/m/0ct2tf5	/film/film/other_crew./film/film_crew_gig/film_crew_role	/m/02_n3z
/m/05hyn5	/soccer/football_team/current_roster./soccer/football_roster_position/position	/m/02_j1w
/m/0nk72	/user/alexander/philosophy/philosopher/interests	/m/04s0m
/m/08815	/education/educational_institution/students_graduates./education/education/major_field_of_study	/m/01zc2w
/m/015pxr	/award/award_winner/awards_won./award/award_honor/award_winner	/m/0bczgm
/m/04wvhz	/award/award_nominee/award_nominations./award/award_nomination/award_nominee	/m/07lwsz
/m/0dx8gj	/film/film/genre	/m/082gq
/m/0cjyzs	/award/award_category/nominees./award/award_nomination/nominated_for	/m/014gjp
/m/034487	/music/genre/artists	/m/01k_yf
/m/02rb607	/film/film/country	/m/0345h
/m/0cjsxp	/award/award_winner/awards_won./award/award_honor/award_winner	/m/02tr7d
/m/06mkj	/olympics/olympic_participating_country/athletes./olympics/olympic_athlete_affiliation/olympics	/m/0kbvv
