# Supplementary material
Source: ML conference proceedings conference paper supplement (https://proceedings.neurips.cc/paper_files/paper/2021/hash/0fd600c953cde8121262e322ef09f70e-Abstract.html)
Supplement: Supplementary file 1 [file 0fd600c953cde8121262e322ef09f70e-Supplemental.zip › Supplementary_Material_Paper_8745/data/GraIL-BM_fb237_v2/test/test-graph.txt]

/m/02hsq3m	/award/award_category/nominees./award/award_nomination/nominated_for	/m/02rb84n
/m/05kj_	/location/location/contains	/m/0zgfm
/m/0h3vhfb	/award/award_category/winners./award/award_honor/award_winner	/m/0gz5hs
/m/0j_sncb	/education/educational_institution/students_graduates./education/education/student	/m/017f4y
/m/0m_v0	/award/award_nominee/award_nominations./award/award_nomination/award	/m/02ddq4
/m/0gq_v	/award/award_category/nominees./award/award_nomination/nominated_for	/m/0168ls
/m/026m3y	/education/university/international_tuition./measurement_unit/dated_money_value/currency	/m/01nv4h
/m/01vksx	/film/film/release_date_s./film/film_regional_release_date/film_release_region	/m/05r4w
/m/018x3	/award/award_nominee/award_nominations./award/award_nomination/award_nominee	/m/0l12d
/m/019v9k	/education/educational_degree/people_with_this_degree./education/education/institution	/m/08815
/m/0dc7hc	/film/film/production_companies	/m/0g1rw
/m/09cr8	/award/award_nominated_work/award_nominations./award/award_nomination/nominated_for	/m/04lhc4
/m/01x4r3	/people/person/profession	/m/0cbd2
/m/017s11	/film/film_distributor/films_distributed./film/film_film_distributor_relationship/film	/m/065dc4
/m/031hxk	/education/educational_institution/students_graduates./education/education/major_field_of_study	/m/02_7t
/m/0bt7ws	/award/award_winner/awards_won./award/award_honor/award_winner	/m/08wq0g
/m/061fhg	/music/genre/artists	/m/06nv27
/m/03q5t	/music/performance_role/regular_performances./music/group_membership/role	/m/0l14j_
/m/0flw6	/award/award_nominee/award_nominations./award/award_nomination/award	/m/0bdwqv
/m/057lbk	/film/film/other_crew./film/film_crew_gig/film_crew_role	/m/02_n3z
/m/01z9_x	/people/person/profession	/m/09jwl
/m/0fp_xp	/soccer/football_player/current_team./sports/sports_team_roster/team	/m/0284h6
/m/0154d7	/people/person/profession	/m/0cbd2
/m/06bwtj	/award/award_category/winners./award/award_honor/ceremony	/m/0ds460j
/m/0j_sncb	/education/educational_institution/students_graduates./education/education/major_field_of_study	/m/02jfc
/m/02xj3rw	/award/award_category/nominees./award/award_nomination/nominated_for	/m/02nczh
/m/023s8	/award/award_winner/awards_won./award/award_honor/award_winner	/m/01qr1_
/m/01chpn	/film/film/genre	/m/06nbt
/m/0n5jm	/location/location/time_zones	/m/02hcv8
/m/016zgj	/music/genre/artists	/m/03mszl
/m/01w20rx	/people/person/place_of_birth	/m/0mnzd
/m/08815	/education/educational_institution/students_graduates./education/education/major_field_of_study	/m/05qdh
/m/0drrw	/location/location/time_zones	/m/02hcv8
/m/0glt670	/music/genre/artists	/m/01k5t_3
/m/0htww	/film/film/release_date_s./film/film_regional_release_date/film_release_region	/m/0345h
/m/0n6f8	/film/actor/film./film/performance/film	/m/0c1sgd3
/m/076psv	/award/award_nominee/award_nominations./award/award_nomination/award_nominee	/m/058z1hb
/m/02jxbw	/award/award_winning_work/awards_won./award/award_honor/award	/m/0gqy2
/m/02k9k9	/soccer/football_team/current_roster./sports/sports_team_roster/position	/m/02_j1w
/m/079kr	/music/artist/origin	/m/04jpl
/m/03ksy	/education/educational_institution/students_graduates./education/education/major_field_of_study	/m/05qjt
/m/0glbqt	/award/award_winning_work/awards_won./award/award_honor/award_winner	/m/0jgwf
/m/02x1z2s	/award/award_category/nominees./award/award_nomination/nominated_for	/m/03n3gl
/m/0k4kk	/award/award_winning_work/awards_won./award/award_honor/award_winner	/m/0gqrb
/m/03ksy	/education/educational_institution/students_graduates./education/education/student	/m/06l6nj
/m/0d90m	/film/film/genre	/m/01hmnh
/m/047q2wc	/award/award_winner/awards_won./award/award_honor/award_winner	/m/06jvj7
/m/04d_mtq	/people/person/profession	/m/09jwl
/m/05yjhm	/award/award_winner/awards_won./award/award_honor/award_winner	/m/047q2wc
/m/019f4v	/award/award_category/nominees./award/award_nomination/nominated_for	/m/0fpv_3_
/m/01lct6	/people/person/profession	/m/0fj9f
/m/03558l	/sports/sports_position/players./sports/sports_team_roster/team	/m/0jmgb
/m/02p_ycc	/award/award_nominee/award_nominations./award/award_nomination/award_nominee	/m/021_rm
/m/026t6	/music/instrument/instrumentalists	/m/03mszl
/m/037d35	/people/person/place_of_birth	/m/0v9qg
/m/076psv	/award/award_nominee/award_nominations./award/award_nomination/award_nominee	/m/0cb77r
/m/018x3	/music/artist/track_contributions./music/track_contribution/role	/m/01vj9c
/m/09d5h	/film/film_distributor/films_distributed./film/film_film_distributor_relationship/film	/m/0cq7kw
/m/0kvgtf	/film/film/language	/m/04306rv
/m/0bjkpt	/people/person/profession	/m/0cbd2
/m/01wyz92	/award/award_nominee/award_nominations./award/award_nomination/award_nominee	/m/01vrt_c
/m/02_j1w	/sports/sports_position/players./sports/sports_team_roster/team	/m/0ckf6
/m/011zf2	/award/award_nominee/award_nominations./award/award_nomination/award_nominee	/m/02cx90
/m/02cq61	/education/educational_degree/people_with_this_degree./education/education/institution	/m/0gjv_
/m/01cgz	/olympics/olympic_sport/athletes./olympics/olympic_athlete_affiliation/country	/m/05bmq
/m/0gq9h	/award/award_category/nominees./award/award_nomination/nominated_for	/m/011yr9
/m/01v9l67	/award/award_nominee/award_nominations./award/award_nomination/award_nominee	/m/01846t
/m/0kzy0	/music/group_member/membership./music/group_membership/role	/m/01vj9c
/m/011k1h	/music/record_label/artist	/m/018d6l
/m/02qsjt	/award/award_winner/awards_won./award/award_honor/award_winner	/m/01z9_x
/m/070zc	/location/administrative_division/first_level_division_of	/m/0345h
/m/01t0dy	/education/educational_institution/students_graduates./education/education/student	/m/013423
/m/02y0dd	/soccer/football_player/current_team./sports/sports_team_roster/team	/m/0ckf6
/m/03ym1	/award/award_nominee/award_nominations./award/award_nomination/nominated_for	/m/017gm7
/m/0gwgn1k	/film/film/release_date_s./film/film_regional_release_date/film_release_region	/m/05r4w
/m/067ghz	/film/film/release_date_s./film/film_regional_release_date/film_release_region	/m/01mk6
/m/03g9xj	/tv/tv_program/genre	/m/01hmnh
/m/0cjsxp	/film/actor/film./film/performance/film	/m/05q7874
/m/03y82t6	/film/actor/film./film/performance/film	/m/0ds5_72
/m/03cp4cn	/film/film/other_crew./film/film_crew_gig/film_crew_role	/m/01xy5l_
/m/03lh3v	/people/person/places_lived./people/place_lived/location	/m/0b_cr
/m/03np_7	/education/educational_institution/colors	/m/0jc_p
/m/0134wr	/award/award_nominee/award_nominations./award/award_nomination/award	/m/01c9jp
/m/01vtj38	/award/award_nominee/award_nominations./award/award_nomination/award	/m/03qbnj
/m/0dq16	/location/location/time_zones	/m/02hcv8
/m/0ccvx	/location/location/adjoin_s./location/adjoining_relationship/adjoins	/m/02m4d
/m/0bczgm	/award/award_nominee/award_nominations./award/award_nomination/award_nominee	/m/06jnvs
/m/0gr0m	/award/award_category/nominees./award/award_nomination/nominated_for	/m/011yqc
/m/0bwgc_	/award/award_nominee/award_nominations./award/award_nomination/award_nominee	/m/0159h6
/m/01hmnh	/media_common/netflix_genre/titles	/m/05pxnmb
/m/076lxv	/award/award_nominee/award_nominations./award/award_nomination/award	/m/0gq_v
/m/02x73k6	/award/award_category/nominees./award/award_nomination/nominated_for	/m/09cr8
/m/07y_7	/music/performance_role/regular_performances./music/group_membership/group	/m/0jltp
/m/016khd	/award/award_nominee/award_nominations./award/award_nomination/award	/m/0bdwqv
/m/02yy9r	/film/film/featured_film_locations	/m/04jpl
/m/01qr1_	/award/award_nominee/award_nominations./award/award_nomination/award_nominee	/m/0863x_
/m/01ky7c	/education/university/fraternities_and_sororities	/m/035tlh
/m/01v9l67	/film/actor/film./film/performance/film	/m/017gm7
/m/018d6l	/music/group_member/membership./music/group_membership/role	/m/01vj9c
/m/0gq_v	/award/award_category/nominees./award/award_nomination/nominated_for	/m/0kvb6p
/m/0gmgwnv	/film/film/production_companies	/m/030_1_
/m/01s1zk	/award/award_nominee/award_nominations./award/award_nomination/award	/m/02f764
/m/01grpq	/government/legislative_session/members./government/government_position_held/district_represented	/m/026mj
/m/02_j1w	/sports/sports_position/players./sports/sports_team_roster/team	/m/07sqbl
/m/0894_x	/people/person/nationality	/m/05sb1
/m/01w40h	/music/record_label/artist	/m/03h_fk5
/m/02qssrm	/award/award_winner/awards_won./award/award_honor/award_winner	/m/05yjhm
/m/016h9b	/music/group_member/membership./music/group_membership/role	/m/03q5t
/m/017gm7	/award/award_winning_work/awards_won./award/award_honor/award_winner	/m/02bfxb
/m/03s2y9	/people/person/profession	/m/0cbd2
/m/04mhl	/award/award_nominee/award_nominations./award/award_nomination/award	/m/0265vt
/m/03bwzr4	/education/educational_degree/people_with_this_degree./education/education/institution	/m/01ky7c
/m/01vksx	/film/film/release_date_s./film/film_regional_release_date/film_release_region	/m/0345h
/m/0584r4	/award/award_winning_work/awards_won./award/award_honor/award_winner	/m/0gz5hs
/m/035yn8	/film/film/release_date_s./film/film_regional_release_date/film_release_region	/m/03gj2
/m/0gqy2	/award/award_category/winners./award/award_honor/ceremony	/m/02jp5r
/m/0gq9h	/award/award_category/winners./award/award_honor/award_winner	/m/0c921
/m/04jhhng	/award/award_category/disciplines_or_subjects	/m/02xlf
/m/060bp	/government/government_office_category/officeholders./government/government_position_held/jurisdiction_of_office	/m/03rjj
/m/0mbql	/film/film/featured_film_locations	/m/05kj_
/m/0h95927	/film/film/release_date_s./film/film_regional_release_date/film_release_region	/m/0345h
/m/07j8kh	/people/person/profession	/m/0dz3r
/m/01c6l	/film/director/film	/m/0b2v79
/m/02q52q	/film/film/music	/m/01_k71
/m/0345h	/olympics/olympic_participating_country/athletes./olympics/olympic_athlete_affiliation/olympics	/m/0kbvv
/m/02fsn	/music/performance_role/track_performances./music/track_contribution/role	/m/01bns_
/m/0d9v9q	/sports/pro_athlete/teams./sports/sports_team_roster/team	/m/02_cq0
/m/039g82	/award/award_nominee/award_nominations./award/award_nomination/award_nominee	/m/031296
/m/05p1tzf	/film/film/release_date_s./film/film_regional_release_date/film_release_region	/m/03rjj
/m/01vksx	/film/film/release_date_s./film/film_regional_release_date/film_release_region	/m/03rjj
/m/09k56b7	/film/film/release_date_s./film/film_regional_release_date/film_release_region	/m/03gj2
/m/01csrl	/people/person/places_lived./people/place_lived/location	/m/06wxw
/m/0gthm	/award/award_nominee/award_nominations./award/award_nomination/award	/m/0265vt
/m/07qy0b	/award/award_nominee/award_nominations./award/award_nomination/nominated_for	/m/03fts
/m/03z9585	/film/film/release_date_s./film/film_regional_release_date/film_release_region	/m/0345h
/m/024mpp	/film/film/featured_film_locations	/m/035p3
/m/0pk41	/award/award_nominee/award_nominations./award/award_nomination/award	/m/03qbnj
/m/01v9l67	/award/award_winner/awards_won./award/award_honor/award_winner	/m/024n3z
/m/0432cd	/award/award_nominee/award_nominations./award/award_nomination/award	/m/0bdwqv
/m/03ksy	/education/educational_institution/students_graduates./education/education/major_field_of_study	/m/02vxn
/m/0gq_v	/award/award_category/winners./award/award_honor/award_winner	/m/076lxv
/m/0pk41	/people/person/profession	/m/09jwl
/m/01pcq3	/award/award_winner/awards_won./award/award_honor/award_winner	/m/0372kf
/m/0fkzq	/government/government_office_category/officeholders./government/government_position_held/jurisdiction_of_office	/m/05kkh
/m/05dtsb	/film/actor/film./film/performance/film	/m/07gp9
/m/05sb1	/location/location/contains	/m/0dhd5
/m/0ljbg	/soccer/football_team/current_roster./soccer/football_roster_position/position	/m/02_j1w
/m/014gjp	/tv/tv_program/genre	/m/06nbt
/m/019f4v	/award/award_category/nominees./award/award_nomination/nominated_for	/m/0b4lkx
/m/05mrf_p	/film/film/other_crew./film/film_crew_gig/film_crew_role	/m/01xy5l_
/m/06nz46	/people/person/profession	/m/0dgd_
/m/03bggl	/award/award_nominee/award_nominations./award/award_nomination/award	/m/0bdwqv
/m/04btyz	/media_common/netflix_genre/titles	/m/06z8s_
/m/02_l96	/award/award_nominee/award_nominations./award/award_nomination/award_nominee	/m/017s11
/m/02hsq3m	/award/award_category/nominees./award/award_nomination/nominated_for	/m/062zm5h
/m/02bg8v	/tv/tv_program/regular_cast./tv/regular_tv_appearance/actor	/m/0h0jz
/m/0gmgwnv	/film/film/release_date_s./film/film_regional_release_date/film_release_region	/m/0345h
/m/09sh8k	/film/film/other_crew./film/film_crew_gig/film_crew_role	/m/02_n3z
/m/0qf43	/award/award_nominee/award_nominations./award/award_nomination/nominated_for	/m/012kyx
/m/0bynt	/olympics/olympic_sport/athletes./olympics/olympic_athlete_affiliation/country	/m/0345h
/m/02g_6j	/sports/sports_position/players./sports/sports_team_roster/team	/m/043vc
/m/02tr7d	/award/award_nominee/award_nominations./award/award_nomination/award_nominee	/m/05cj4r
/m/033hn8	/music/record_label/artist	/m/01323p
/m/07s6tbm	/award/award_nominee/award_nominations./award/award_nomination/nominated_for	/m/02_1rq
/m/01t0dy	/education/educational_institution/students_graduates./education/education/major_field_of_study	/m/02jfc
/m/01t_z	/people/person/places_lived./people/place_lived/location	/m/0345h
/m/0g1rw	/award/award_nominee/award_nominations./award/award_nomination/nominated_for	/m/083skw
/m/033tf_	/people/ethnicity/people	/m/04x1_w
/m/02vrgnr	/film/film/produced_by	/m/06dkzt
/m/04d_mtq	/people/person/place_of_birth	/m/0xl08
/m/05yjhm	/award/award_nominee/award_nominations./award/award_nomination/award_nominee	/m/047q2wc
/m/02_j1w	/sports/sports_position/players./sports/sports_team_roster/team	/m/02pp1
/m/0gqy2	/award/award_category/nominees./award/award_nomination/nominated_for	/m/011ycb
/m/03_wtr	/award/award_nominee/award_nominations./award/award_nomination/award_nominee	/m/01sl1q
/m/01hw6wq	/people/person/profession	/m/09jwl
/m/0r8c8	/location/location/time_zones	/m/02lcqs
/m/08j7lh	/award/award_winning_work/awards_won./award/award_honor/award_winner	/m/0342vg
/m/02725hs	/film/film/genre	/m/082gq
/m/03ksy	/education/educational_institution/students_graduates./education/education/student	/m/06jkm
/m/02l3_5	/people/person/place_of_birth	/m/02j3w
/m/03bx0bm	/music/performance_role/regular_performances./music/group_membership/group	/m/014pg1
/m/0125xq	/award/award_winning_work/awards_won./award/award_honor/award	/m/02hsq3m
/m/04yg13l	/film/film/release_date_s./film/film_regional_release_date/film_release_region	/m/06mkj
/m/0mj0c	/influence/influence_node/influenced_by	/m/06jkm
/m/01vw87c	/people/person/profession	/m/0dz3r
/m/05fkf	/location/location/time_zones	/m/02hcv8
/m/02_hj4	/award/award_winner/awards_won./award/award_honor/award_winner	/m/02t_v1
/m/08jcfy	/organization/role/leaders./organization/leadership/organization	/m/026m3y
/m/0gq9h	/award/award_category/winners./award/award_honor/ceremony	/m/02jp5r
/m/0m_v0	/people/person/places_lived./people/place_lived/location	/m/06wxw
/m/02bp37	/government/legislative_session/members./government/government_position_held/district_represented	/m/0gj4fx
/m/01k5t_3	/award/award_nominee/award_nominations./award/award_nomination/award_nominee	/m/0m_v0
/m/02lfp4	/award/award_winner/awards_won./award/award_honor/award_winner	/m/01pbwwl
/m/033gn8	/education/educational_institution/students_graduates./education/education/student	/m/0h0wc
/m/0gs1_	/film/director/film	/m/011ycb
/m/03h_fk5	/award/award_winner/awards_won./award/award_honor/award_winner	/m/0p7h7
/m/017s11	/film/film_distributor/films_distributed./film/film_film_distributor_relationship/film	/m/034hwx
/m/04kjrv	/music/group_member/membership./music/group_membership/role	/m/03bx0bm
/m/012q4n	/people/person/profession	/m/09jwl
/m/0j2pg	/sports/sports_team/colors	/m/01g5v
/m/0h21v2	/film/film/release_date_s./film/film_regional_release_date/film_release_region	/m/06mkj
/m/07nf6	/location/administrative_division/country	/m/0345h
/m/01hmnh	/media_common/netflix_genre/titles	/m/02q52q
/m/099c8n	/award/award_category/nominees./award/award_nomination/nominated_for	/m/021y7yw
/m/01y06y	/organization/organization/headquarters./location/mailing_address/state_province_region	/m/070zc
/m/05qdh	/media_common/netflix_genre/titles	/m/02jxrw
/m/0fb1q	/award/award_nominee/award_nominations./award/award_nomination/nominated_for	/m/08xvpn
/m/01qb5d	/film/film/prequel	/m/0d90m
/m/06jrhz	/award/award_nominee/award_nominations./award/award_nomination/award_nominee	/m/09b0xs
/m/0gq_v	/award/award_category/nominees./award/award_nomination/nominated_for	/m/0gy4k
/m/04k4l	/organization/organization/headquarters./location/mailing_address/citytown	/m/03902
/m/0d9v9q	/people/person/places_lived./people/place_lived/location	/m/0m75g
/m/01hkhq	/award/award_winner/awards_won./award/award_honor/award_winner	/m/02tr7d
/m/02py4c8	/film/film/genre	/m/01hmnh
/m/02_j1w	/sports/sports_position/players./sports/sports_team_roster/team	/m/01j48s
/m/0bjkpt	/award/award_nominee/award_nominations./award/award_nomination/award	/m/0gq_d
/m/0zjpz	/base/popstra/celebrity/dated./base/popstra/dated/participant	/m/02f8lw
/m/05cj4r	/people/person/places_lived./people/place_lived/location	/m/04jpl
/m/03lmx1	/people/ethnicity/people	/m/02tr7d
/m/03hpkp	/education/educational_institution/colors	/m/01g5v
/m/04shbh	/film/actor/film./film/performance/film	/m/011yr9
/m/03f4w4	/people/person/place_of_birth	/m/04jpl
/m/0hx4y	/award/award_winning_work/awards_won./award/award_honor/award	/m/02hsq3m
/m/01vv6xv	/people/person/profession	/m/09jwl
/m/0gq_v	/award/award_category/nominees./award/award_nomination/nominated_for	/m/04h4c9
/m/01w1sx	/film/film_subject/films	/m/03cp4cn
/m/09gq0x5	/film/film/genre	/m/02p0szs
/m/01gst_	/government/legislative_session/members./government/government_position_held/district_represented	/m/026mj
/m/019f4v	/award/award_category/nominees./award/award_nomination/nominated_for	/m/09cr8
/m/0zjpz	/people/person/profession	/m/0dz3r
/m/04cv9m	/film/film/country	/m/0345h
/m/034hwx	/film/film/featured_film_locations	/m/04jpl
/m/05dbf	/people/person/profession	/m/09jwl
/m/02_j1w	/sports/sports_position/players./sports/sports_team_roster/team	/m/02b185
/m/0gq_d	/award/award_category/winners./award/award_honor/ceremony	/m/0bzmt8
/m/06jvj7	/award/award_winner/awards_won./award/award_honor/award_winner	/m/02pt6k_
/m/05kj_	/location/location/adjoin_s./location/adjoining_relationship/adjoins	/m/081yw
/m/09v0p2c	/award/award_ceremony/awards_presented./award/award_honor/award_winner	/m/0284gcb
/m/01vrt_c	/award/award_nominee/award_nominations./award/award_nomination/award_nominee	/m/01wyz92
/m/02j3d4	/award/award_nominee/award_nominations./award/award_nomination/award_nominee	/m/02cx90
/m/01s5q	/film/film_subject/films	/m/0gjk1d
/m/017f3m	/tv/tv_program/regular_cast./tv/regular_tv_appearance/actor	/m/046m59
/m/01ry0f	/film/actor/film./film/performance/film	/m/01q2nx
/m/04969y	/film/film/release_date_s./film/film_regional_release_date/film_release_region	/m/03gj2
/m/0m_31	/people/person/profession	/m/09jwl
/m/01hmnh	/media_common/netflix_genre/titles	/m/02py4c8
/m/0glbqt	/film/film/genre	/m/082gq
/m/01gtcq	/government/legislative_session/members./government/government_position_held/district_represented	/m/05kkh
/m/03qnvdl	/film/film/release_date_s./film/film_regional_release_date/film_release_region	/m/0345h
/m/04ls53	/award/award_nominee/award_nominations./award/award_nomination/nominated_for	/m/08phg9
/m/03d_zl4	/base/americancomedy/celebrity_impressionist/celebrities_impersonated	/m/01nr63
/m/015qqg	/film/film/language	/m/04306rv
/m/0134w7	/award/award_nominee/award_nominations./award/award_nomination/nominated_for	/m/0g57wgv
/m/06mkj	/media_common/netflix_genre/titles	/m/02vr3gz
/m/02ctzb	/people/ethnicity/people	/m/032t2z
/m/0l14j_	/music/performance_role/regular_performances./music/group_membership/role	/m/03q5t
/m/0j862	/music/performance_role/regular_performances./music/group_membership/role	/m/01vj9c
/m/0345h	/location/location/contains	/m/05bkf
/m/02r0st6	/people/person/place_of_birth	/m/0xn7q
/m/05_6_y	/soccer/football_player/current_team./sports/sports_team_roster/team	/m/02b15h
/m/0262yt	/award/award_category/winners./award/award_honor/award_winner	/m/018fq
/m/04411	/influence/influence_node/peers./influence/peer_relationship/peers	/m/0mj0c
/m/0grmhb	/award/award_winner/awards_won./award/award_honor/award_winner	/m/07d370
/m/03yk8z	/film/actor/film./film/performance/film	/m/09gq0x5
/m/024mxd	/film/film/prequel	/m/042g97
/m/0cd25	/people/cause_of_death/people	/m/02hfp_
/m/054nbl	/music/genre/artists	/m/02cx90
/m/08pth9	/film/actor/film./film/performance/film	/m/098s2w
/m/0gmgwnv	/award/award_winning_work/awards_won./award/award_honor/award	/m/099ck7
/m/04411	/influence/influence_node/influenced_by	/m/03sbs
/m/019v9k	/education/educational_degree/people_with_this_degree./education/education/major_field_of_study	/m/02jfc
/m/067ghz	/film/film/release_date_s./film/film_regional_release_date/film_release_region	/m/0345h
/m/073749	/film/actor/film./film/performance/film	/m/02ht1k
/m/099c8n	/award/award_category/nominees./award/award_nomination/nominated_for	/m/0h95927
/m/0ljbg	/soccer/football_team/current_roster./sports/sports_team_roster/position	/m/02_j1w
/m/07y_7	/music/instrument/instrumentalists	/m/02j3d4
/m/0hx4y	/film/film/production_companies	/m/030_1_
/m/0y_9q	/award/award_winning_work/awards_won./award/award_honor/award_winner	/m/047q2wc
/m/01ky7c	/education/educational_institution/school_type	/m/01_9fk
/m/013sg6	/film/actor/film./film/performance/film	/m/0k4kk
/m/07gp9	/film/film/release_date_s./film/film_regional_release_date/film_release_region	/m/0345h
/m/07xl34	/organization/role/leaders./organization/leadership/organization	/m/02hwww
/m/0134w7	/film/actor/film./film/performance/film	/m/0g57wgv
/m/0cmc26r	/film/film/release_date_s./film/film_regional_release_date/film_release_region	/m/03gj2
/m/02_j1w	/sports/sports_position/players./sports/sports_team_roster/team	/m/04r7f2
/m/0639bg	/film/film/featured_film_locations	/m/04jpl
/m/02vrgnr	/film/film/language	/m/03_9r
/m/019v9k	/education/educational_degree/people_with_this_degree./education/education/major_field_of_study	/m/05qjt
/m/0d6b7	/film/film/release_date_s./film/film_regional_release_date/film_release_region	/m/05r4w
/m/02j8nx	/award/award_nominee/award_nominations./award/award_nomination/award_nominee	/m/01r216
/m/03qbnj	/award/award_category/winners./award/award_honor/award_winner	/m/0pk41
/m/0gq_v	/award/award_category/nominees./award/award_nomination/nominated_for	/m/0gt14
/m/01vrt_c	/people/person/profession	/m/09jwl
/m/0jhjl	/organization/organization/headquarters./location/mailing_address/citytown	/m/01914
/m/02_l96	/film/actor/film./film/performance/film	/m/07k2mq
/m/02_j1w	/sports/sports_position/players./sports/sports_team_roster/team	/m/01_lhg
/m/011j5x	/music/genre/artists	/m/0l12d
/m/0142rn	/business/job_title/people_with_this_title./business/employment_tenure/company	/m/0jbk9
/m/0bdwqv	/award/award_category/nominees./award/award_nomination/nominated_for	/m/02bg8v
/m/0bynt	/olympics/olympic_sport/athletes./olympics/olympic_athlete_affiliation/country	/m/04sj3
/m/0k8y7	/people/person/place_of_birth	/m/0d6lp
/m/0h0wc	/base/popstra/celebrity/friendship./base/popstra/friendship/participant	/m/0c3p7
/m/07vyf	/education/educational_institution/students_graduates./education/education/major_field_of_study	/m/09s1f
/m/0486tv	/olympics/olympic_sport/athletes./olympics/olympic_athlete_affiliation/country	/m/036b_
/m/021_rm	/award/award_winner/awards_won./award/award_honor/award_winner	/m/01dy7j
/m/0gqng	/award/award_category/winners./award/award_honor/ceremony	/m/0dthsy
/m/0gqy2	/award/award_category/nominees./award/award_nomination/nominated_for	/m/0y_9q
/m/0gq_v	/award/award_category/nominees./award/award_nomination/nominated_for	/m/0glbqt
/m/012vf6	/film/actor/film./film/performance/film	/m/0bl5c
/m/03y82t6	/award/award_nominee/award_nominations./award/award_nomination/award_nominee	/m/02l840
/m/0265vt	/award/award_category/winners./award/award_honor/award_winner	/m/04mhl
/m/073bb	/influence/influence_node/influenced_by	/m/041_y
/m/02rn00y	/award/award_winning_work/awards_won./award/award_honor/award_winner	/m/04ls53
/m/07nf6	/base/aareas/schema/administrative_area/administrative_parent	/m/0345h
/m/02d42t	/film/actor/film./film/performance/film	/m/03_gz8
/m/01sbv9	/film/film/language	/m/04306rv
/m/0gqy2	/award/award_category/nominees./award/award_nomination/nominated_for	/m/0gt14
/m/03q5t	/music/performance_role/regular_performances./music/group_membership/role	/m/03bx0bm
/m/017s11	/film/film_distributor/films_distributed./film/film_film_distributor_relationship/film	/m/0gwgn1k
/m/01w56k	/music/record_label/artist	/m/0c7ct
/m/02flq1	/award/award_category/winners./award/award_honor/ceremony	/m/056878
/m/02fsn	/music/performance_role/regular_performances./music/group_membership/role	/m/07y_7
/m/0d68qy	/award/award_winning_work/awards_won./award/award_honor/award_winner	/m/0284gcb
/m/07vfqj	/soccer/football_player/current_team./sports/sports_team_roster/team	/m/01gjlw
/m/03lmx1	/people/ethnicity/people	/m/04xhwn
/m/0gq_v	/award/award_category/nominees./award/award_nomination/nominated_for	/m/0cq7kw
/m/02gr81	/education/educational_institution/students_graduates./education/education/major_field_of_study	/m/0fdys
/m/0fb1q	/film/actor/film./film/performance/film	/m/098s2w
/m/0gh8zks	/film/film/release_date_s./film/film_regional_release_date/film_release_region	/m/05r4w
/m/03rbzn	/olympics/olympic_sport/athletes./olympics/olympic_athlete_affiliation/country	/m/0345_
/m/07t21	/location/location/contains	/m/03x45p
/m/04wvhz	/award/award_nominee/award_nominations./award/award_nomination/award	/m/0gq9h
/m/02x4w6g	/award/award_category/nominees./award/award_nomination/nominated_for	/m/05ft32
/m/07szy	/education/educational_institution/students_graduates./education/education/major_field_of_study	/m/02jfc
/m/03h64	/location/statistical_region/places_exported_to./location/imports_and_exports/exported_to	/m/04sj3
/m/05sb1	/location/location/contains	/m/075mb
/m/02pp1	/base/x2010fifaworldcupsouthafrica/world_cup_squad/current_world_cup_squad./base/x2010fifaworldcupsouthafrica/current_world_cup_squad/current_club	/m/023fb
/m/0gqy2	/award/award_category/nominees./award/award_nomination/nominated_for	/m/0h95927
/m/02x1dht	/award/award_category/nominees./award/award_nomination/nominated_for	/m/026qnh6
/m/015qsq	/film/film/runtime./film/film_cut/film_release_region	/m/06mkj
/m/02qfhb	/people/person/profession	/m/09jwl
/m/05sb1	/location/location/adjoin_s./location/adjoining_relationship/adjoins	/m/06k5_
/m/08bytj	/tv/tv_program/regular_cast./tv/regular_tv_appearance/actor	/m/0h1nt
/m/04255q	/soccer/football_team/current_roster./soccer/football_roster_position/position	/m/02_j1w
/m/03q5t	/music/performance_role/regular_performances./music/group_membership/role	/m/07y_7
/m/05dss7	/film/film/film_festivals	/m/0kfhjq0
/m/04ls53	/award/award_nominee/award_nominations./award/award_nomination/nominated_for	/m/02rn00y
/m/04gtdnh	/award/award_nominee/award_nominations./award/award_nomination/award_nominee	/m/070w7s
/m/017gm7	/film/film/release_date_s./film/film_regional_release_date/film_release_region	/m/0345h
/m/03c7ln	/people/person/profession	/m/02tx6q
/m/01kws3	/people/person/profession	/m/0cbd2
/m/073749	/award/award_nominee/award_nominations./award/award_nomination/award_nominee	/m/028d4v
/m/0dzs0	/location/location/time_zones	/m/02hcv8
/m/0g57wgv	/film/film/release_date_s./film/film_regional_release_date/film_release_region	/m/03rt9
/m/04l19_	/people/person/places_lived./people/place_lived/location	/m/05kkh
/m/0p7h7	/award/award_winner/awards_won./award/award_honor/award_winner	/m/03h_fk5
/m/05hmp6	/award/award_ceremony/awards_presented./award/award_honor/honored_for	/m/0bl06
/m/0h0wc	/award/award_winner/awards_won./award/award_honor/award_winner	/m/05dbf
/m/03n5v	/soccer/football_team/current_roster./soccer/football_roster_position/position	/m/02_j1w
/m/01cgz	/olympics/olympic_sport/athletes./olympics/olympic_athlete_affiliation/country	/m/07dvs
/m/0487c3	/soccer/football_player/current_team./sports/sports_team_roster/team	/m/01bdxz
/m/0d500h	/award/award_nominee/award_nominations./award/award_nomination/nominated_for	/m/0286vp
/m/034np8	/film/actor/film./film/performance/film	/m/0p9lw
/m/03h4fq7	/film/film/genre	/m/03p5xs
/m/080dwhx	/award/award_winning_work/awards_won./award/award_honor/award_winner	/m/0cjsxp
/m/01cm8w	/film/film/release_date_s./film/film_regional_release_date/film_release_region	/m/03h64
/m/04_cdd	/soccer/football_team/current_roster./soccer/football_roster_position/position	/m/02_j1w
/m/014l7h	/business/job_title/people_with_this_title./business/employment_tenure/company	/m/01w92
/m/02vxn	/education/field_of_study/students_majoring./education/education/student	/m/0bg539
/m/06z8s_	/film/film/genre	/m/04btyz
/m/02py4c8	/tv/tv_program/regular_cast./tv/regular_tv_appearance/actor	/m/0h0wc
/m/01bjbk	/award/ranked_item/appears_in_ranked_lists./award/ranking/list	/m/05glt
/m/01f2w0	/tv/tv_network/programs./tv/tv_network_duration/program	/m/05397h
/m/0n6f8	/award/award_nominee/award_nominations./award/award_nomination/award	/m/05zvj3m
/m/01qzyz	/music/performance_role/track_performances./music/track_contribution/role	/m/01vj9c
/m/0yfvf	/base/biblioness/bibs_location/state	/m/05fkf
/m/053yx	/influence/influence_node/influenced_by	/m/0f6lx
/m/0cmc26r	/film/film/release_date_s./film/film_regional_release_date/film_release_region	/m/0345h
/m/01f7d	/award/award_category/winners./award/award_honor/award_winner	/m/01w8sf
/m/02ps55	/education/university/local_tuition./measurement_unit/dated_money_value/currency	/m/01nv4h
/m/01xn6jr	/soccer/football_team/current_roster./soccer/football_roster_position/position	/m/02_j1w
/m/0c6g29	/award/award_nominee/award_nominations./award/award_nomination/nominated_for	/m/0k4kk
/m/017s11	/film/film_distributor/films_distributed./film/film_film_distributor_relationship/film	/m/02ph9tm
/m/050ks	/location/location/contains	/m/01vc5m
/m/0cks1m	/film/film/genre	/m/01hmnh
/m/07k2mq	/film/film/release_date_s./film/film_regional_release_date/film_release_region	/m/03rjj
/m/0flw6	/award/award_nominee/award_nominations./award/award_nomination/award_nominee	/m/0716t2
/m/03bx0bm	/music/performance_role/regular_performances./music/group_membership/role	/m/02dlh2
/m/0pk41	/award/award_nominee/award_nominations./award/award_nomination/award_nominee	/m/01z9_x
/m/04jpl	/location/location/contains	/m/026m3y
/m/033hn8	/music/record_label/artist	/m/01wgjj5
/m/01w20rx	/music/artist/track_contributions./music/track_contribution/role	/m/01vj9c
/m/06jvj7	/award/award_winner/awards_won./award/award_honor/award_winner	/m/02qssrm
/m/0m123	/award/award_winning_work/awards_won./award/award_honor/award_winner	/m/09d5h
/m/02mxw0	/film/actor/film./film/performance/film	/m/0d_wms
/m/0j0k	/location/location/contains	/m/03shp
/m/01hvjx	/film/film/genre	/m/06nbt
/m/01r7t9	/people/person/place_of_birth	/m/0cc56
/m/0m4yg	/education/university/local_tuition./measurement_unit/dated_money_value/currency	/m/01nv4h
/m/09v51c2	/award/award_category/nominees./award/award_nomination/nominated_for	/m/0dkv90
/m/0jtg0	/music/performance_role/track_performances./music/track_contribution/role	/m/026t6
/m/0bl3nn	/film/film/language	/m/09y2k2
/m/01g6bk	/award/award_nominee/award_nominations./award/award_nomination/award	/m/0265vt
/m/01vsps	/people/person/places_lived./people/place_lived/location	/m/04jpl
/m/02pzxlw	/award/award_category/nominees./award/award_nomination/nominated_for	/m/02_1rq
/m/01pcq3	/award/award_nominee/award_nominations./award/award_nomination/award_nominee	/m/018yj6
/m/0d6lp	/dataworld/gardening_hint/split_to	/m/06rny
/m/08xvpn	/award/award_winning_work/awards_won./award/award_honor/award_winner	/m/0fb1q
/m/03q5t	/music/performance_role/track_performances./music/track_contribution/role	/m/0dwt5
/m/02r6nbc	/award/award_category/disciplines_or_subjects	/m/02xlf
/m/0bynt	/olympics/olympic_sport/athletes./olympics/olympic_athlete_affiliation/country	/m/06mkj
/m/019f4v	/award/award_category/nominees./award/award_nomination/nominated_for	/m/0glbqt
/m/0bvzp	/people/person/profession	/m/0cbd2
/m/03mkk4	/education/educational_degree/people_with_this_degree./education/education/institution	/m/08htt0
/m/0ds5_72	/film/film/release_date_s./film/film_regional_release_date/film_release_region	/m/07t21
/m/0gr0m	/award/award_category/winners./award/award_honor/ceremony	/m/02jp5r
/m/0bh8tgs	/film/film/release_date_s./film/film_regional_release_date/film_release_region	/m/03h64
/m/09krp	/location/location/adjoin_s./location/adjoining_relationship/adjoins	/m/07nf6
/m/015qqg	/award/award_winning_work/awards_won./award/award_honor/award_winner	/m/0h1mt
/m/02_j1w	/sports/sports_position/players./sports/sports_team_roster/team	/m/02ltg3
/m/073v6	/people/person/profession	/m/0cbd2
/m/01f_mw	/film/film_distributor/films_distributed./film/film_film_distributor_relationship/film	/m/0286vp
/m/06dkzt	/film/actor/film./film/performance/film	/m/02vrgnr
/m/060bp	/government/government_office_category/officeholders./government/government_position_held/jurisdiction_of_office	/m/04hhv
/m/0dwt5	/music/performance_role/track_performances./music/track_contribution/role	/m/026t6
/m/02dlh2	/music/performance_role/track_performances./music/track_contribution/role	/m/0dwt5
/m/03mkk4	/education/educational_degree/people_with_this_degree./education/education/institution	/m/023p18
/m/03fts	/film/film/music	/m/07qy0b
/m/028k2x	/tv/tv_program/regular_cast./tv/regular_tv_appearance/actor	/m/0gz5hs
/m/033hn8	/music/record_label/artist	/m/01fh0q
/m/03mszl	/award/award_winner/awards_won./award/award_honor/award_winner	/m/0m_v0
/m/017f4y	/base/popstra/celebrity/friendship./base/popstra/friendship/participant	/m/0jsg0m
/m/092j54	/sports/sports_league_draft/picks./sports/sports_league_draft_pick/school	/m/0j_sncb
/m/05dbf	/base/popstra/celebrity/friendship./base/popstra/friendship/participant	/m/0lx2l
/m/0gqy2	/award/award_category/nominees./award/award_nomination/nominated_for	/m/0hfzr
/m/0l38x	/location/location/adjoin_s./location/adjoining_relationship/adjoins	/m/0kpys
/m/0170s4	/film/actor/film./film/performance/film	/m/0n1s0
/m/015g28	/tv/tv_program/languages	/m/04306rv
/m/01gssz	/government/legislative_session/members./government/government_position_held/district_represented	/m/026mj
/m/01z_g6	/award/award_winner/awards_won./award/award_honor/award_winner	/m/01t6xz
/m/02rb607	/film/film/language	/m/04306rv
/m/02_7t	/education/field_of_study/students_majoring./education/education/major_field_of_study	/m/0g4gr
/m/0j2pg	/soccer/football_team/current_roster./soccer/football_roster_position/position	/m/02_j1w
/m/0265vcb	/award/award_nominee/award_nominations./award/award_nomination/award_nominee	/m/04gtdnh
/m/01w40h	/music/record_label/artist	/m/016890
/m/02pt6k_	/award/award_nominee/award_nominations./award/award_nomination/award_nominee	/m/05yjhm
/m/01zwy	/people/person/employment_history./business/employment_tenure/company	/m/03ksy
/m/051qvn	/soccer/football_team/current_roster./soccer/football_roster_position/position	/m/02_j1w
/m/06cc_1	/award/award_nominee/award_nominations./award/award_nomination/award	/m/01c9jp
/m/03rt9	/location/location/contains	/m/011xy1
/m/026t6	/music/instrument/instrumentalists	/m/032t2z
/m/0cmc26r	/film/film/release_date_s./film/film_regional_release_date/film_release_region	/m/03rjj
/m/02pt6k_	/award/award_winner/awards_won./award/award_honor/award_winner	/m/06jvj7
/m/0bynt	/olympics/olympic_sport/athletes./olympics/olympic_athlete_affiliation/country	/m/06dfg
/m/0vm5t	/location/location/time_zones	/m/02hcv8
/m/046f3p	/film/film/executive_produced_by	/m/02vyw
/m/0vhm	/tv/tv_program/regular_cast./tv/regular_tv_appearance/actor	/m/031c2r
/m/0gqng	/award/award_category/winners./award/award_honor/ceremony	/m/02jp5r
/m/03v36	/people/person/profession	/m/0cbd2
/m/0glt670	/music/genre/artists	/m/02l840
/m/04sv4	/organization/organization/headquarters./location/mailing_address/state_province_region	/m/081yw
/m/07xl34	/organization/role/leaders./organization/leadership/organization	/m/07vfz
/m/0g1rw	/award/award_nominee/award_nominations./award/award_nomination/award_nominee	/m/032j_n
/m/03q5t	/music/performance_role/track_performances./music/track_contribution/role	/m/0979zs
/m/08lg0g	/soccer/football_team/current_roster./sports/sports_team_roster/position	/m/02_j1w
/m/0gt_k	/people/person/profession	/m/0dz3r
/m/026t6	/music/performance_role/track_performances./music/track_contribution/role	/m/01vj9c
/m/02qvzf	/sports/sports_position/players./sports/sports_team_roster/team	/m/0c1gj5
/m/0by1wkq	/film/film/release_date_s./film/film_regional_release_date/film_release_region	/m/05sb1
/m/032v0v	/film/director/film	/m/0ds2n
/m/024mpp	/film/film/release_date_s./film/film_regional_release_date/film_release_region	/m/03h64
/m/012x4t	/base/popstra/celebrity/friendship./base/popstra/friendship/participant	/m/095b70
/m/05qdh	/education/field_of_study/students_majoring./education/education/student	/m/0gs1_
/m/01fjw0	/location/administrative_division/country	/m/03rt9
/m/0c_dx	/award/award_category/winners./award/award_honor/award_winner	/m/040_t
/m/016ywr	/film/actor/film./film/performance/film	/m/01_1hw
/m/05_z42	/tv/tv_program/genre	/m/06nbt
/m/073749	/film/actor/film./film/performance/film	/m/01k1k4
/m/04hk0w	/film/film/country	/m/0345h
/m/04j_h4	/music/genre/parent_genre	/m/0hh2s
/m/0dtw1x	/film/film/personal_appearances./film/personal_film_appearance/person	/m/0fb1q
/m/01hv3t	/film/film/genre	/m/01hmnh
/m/098s2w	/film/film/production_companies	/m/017s11
/m/0c58k	/people/cause_of_death/people	/m/016dp0
/m/0l14j_	/music/performance_role/regular_performances./music/group_membership/role	/m/07y_7
/m/0d1mp3	/tv/tv_producer/programs_produced./tv/tv_producer_term/program	/m/03_8kz
/m/05hmp6	/award/award_ceremony/awards_presented./award/award_honor/award_winner	/m/03s2y9
/m/0d90m	/film/film/executive_produced_by	/m/02xnjd
/m/03y8cbv	/award/award_category/nominees./award/award_nomination/nominated_for	/m/04969y
/m/01yjl	/sports/sports_team/colors	/m/01g5v
/m/01k5t_3	/people/person/profession	/m/09jwl
/m/07y_7	/music/performance_role/regular_performances./music/group_membership/role	/m/02fsn
/m/01vc5m	/education/educational_institution/students_graduates./education/education/major_field_of_study	/m/05qjt
/m/02x1dht	/award/award_category/nominees./award/award_nomination/nominated_for	/m/046f3p
/m/011k_j	/music/performance_role/track_performances./music/track_contribution/role	/m/026t6
/m/0ktx_	/award/ranked_item/appears_in_ranked_lists./award/ranking/list	/m/05glt
/m/0gq_d	/award/award_category/winners./award/award_honor/ceremony	/m/0dthsy
/m/019v9k	/education/educational_degree/people_with_this_degree./education/education/institution	/m/0j_sncb
/m/04255q	/soccer/football_team/current_roster./sports/sports_team_roster/position	/m/02_j1w
/m/06jvj7	/award/award_winner/awards_won./award/award_honor/award_winner	/m/05yjhm
/m/03bx0bm	/music/performance_role/regular_performances./music/group_membership/group	/m/017lb_
/m/0p9lw	/film/film/genre	/m/06nbt
/m/03bx0bm	/music/performance_role/regular_performances./music/group_membership/role	/m/0jtg0
/m/0g1rw	/film/film_distributor/films_distributed./film/film_film_distributor_relationship/film	/m/03hfmm
/m/07xl34	/organization/role/leaders./organization/leadership/organization	/m/0m7yh
/m/01kws3	/award/award_nominee/award_nominations./award/award_nomination/award	/m/0cjyzs
/m/01_gv	/soccer/football_team/current_roster./sports/sports_team_roster/position	/m/02_j1w
/m/01t6xz	/award/award_winner/awards_won./award/award_honor/award_winner	/m/03kcyd
/m/01qzyz	/music/performance_role/regular_performances./music/group_membership/role	/m/07y_7
/m/020l9r	/award/award_nominee/award_nominations./award/award_nomination/award_nominee	/m/02m3sd
/m/02_j1w	/sports/sports_position/players./sports/sports_team_roster/team	/m/0b0nq2
/m/07vyf	/education/educational_institution/school_type	/m/01_9fk
/m/02sch9	/people/ethnicity/people	/m/03f02ct
/m/05yjhm	/award/award_nominee/award_nominations./award/award_nomination/award_nominee	/m/06jvj7
/m/03k0yw	/people/person/profession	/m/0dz3r
/m/06zn2v2	/film/film/release_date_s./film/film_regional_release_date/film_release_region	/m/0345h
/m/057bc6m	/film/film_set_designer/film_sets_designed	/m/0k4kk
/m/0584r4	/tv/tv_program/genre	/m/0c4xc
/m/09v51c2	/award/award_category/disciplines_or_subjects	/m/02vxn
/m/01846t	/award/award_nominee/award_nominations./award/award_nomination/award_nominee	/m/01v9l67
/m/09_94	/olympics/olympic_sport/athletes./olympics/olympic_athlete_affiliation/country	/m/07t21
/m/05zl0	/education/educational_institution/students_graduates./education/education/student	/m/07lwsz
/m/026kmvf	/sports/pro_athlete/teams./sports/sports_team_roster/team	/m/01352_
/m/0gq9h	/award/award_category/nominees./award/award_nomination/nominated_for	/m/0gy4k
/m/034487	/music/genre/artists	/m/0l8g0
/m/0418154	/award/award_ceremony/awards_presented./award/award_honor/award_winner	/m/0237fw
/m/0d68qy	/award/award_winning_work/awards_won./award/award_honor/award	/m/0cjyzs
/m/02822	/education/field_of_study/students_majoring./education/education/student	/m/069nzr
/m/03s2y9	/award/award_nominee/award_nominations./award/award_nomination/award	/m/0gq9h
/m/0fvr1	/film/film/genre	/m/06nbt
/m/02lnbg	/music/genre/artists	/m/0127s7
/m/01hpnh	/location/location/adjoin_s./location/adjoining_relationship/adjoins	/m/06k5_
/m/0n6f8	/award/award_nominee/award_nominations./award/award_nomination/nominated_for	/m/05jzt3
/m/019f4v	/award/award_category/nominees./award/award_nomination/nominated_for	/m/011yr9
/m/02_j1w	/sports/sports_position/players./sports/sports_team_roster/team	/m/035l_9
/m/07y_7	/music/performance_role/regular_performances./music/group_membership/role	/m/01vj9c
/m/0bcp9b	/award/award_winning_work/awards_won./award/award_honor/award	/m/02z1nbg
/m/01yznp	/people/person/profession	/m/0cbd2
/m/03z9585	/film/film/release_date_s./film/film_regional_release_date/film_release_region	/m/03rjj
/m/06jnvs	/award/award_nominee/award_nominations./award/award_nomination/nominated_for	/m/0557yqh
/m/0229rs	/music/record_label/artist	/m/0134wr
/m/0229rs	/music/record_label/artist	/m/02qsjt
/m/0gq9h	/award/award_category/nominees./award/award_nomination/nominated_for	/m/0bl06
/m/0d68qy	/tv/tv_program/regular_cast./tv/regular_tv_appearance/actor	/m/0gkydb
/m/07xl34	/organization/role/leaders./organization/leadership/organization	/m/01314k
/m/020hyj	/people/person/profession	/m/0dz3r
/m/0hv81	/film/film/release_date_s./film/film_regional_release_date/film_release_region	/m/06mkj
/m/076lxv	/film/film_set_designer/film_sets_designed	/m/014kkm
/m/01z3bz	/education/educational_institution/students_graduates./education/education/student	/m/07dnx
/m/02q56mk	/film/film/genre	/m/03p5xs
/m/07gp9	/award/award_winning_work/awards_won./award/award_honor/award	/m/02hsq3m
/m/08phg9	/film/film/other_crew./film/film_crew_gig/film_crew_role	/m/01xy5l_
/m/067ghz	/film/film/release_date_s./film/film_regional_release_date/film_release_region	/m/06mkj
/m/0lx2l	/film/actor/film./film/performance/film	/m/01hv3t
/m/0gj8nq2	/film/film/release_date_s./film/film_regional_release_date/film_release_region	/m/03rt9
/m/015d3h	/people/person/places_lived./people/place_lived/location	/m/03rjj
/m/02mjf2	/award/award_nominee/award_nominations./award/award_nomination/award	/m/02x73k6
/m/0fpv_3_	/film/film/release_date_s./film/film_regional_release_date/film_release_region	/m/03gj2
/m/05zvj3m	/award/award_category/nominees./award/award_nomination/nominated_for	/m/05p1tzf
/m/0grmhb	/award/award_nominee/award_nominations./award/award_nomination/award_nominee	/m/07d370
/m/01kgxf	/film/actor/film./film/performance/film	/m/0ct2tf5
/m/0g56t9t	/film/film/personal_appearances./film/personal_film_appearance/person	/m/028d4v
/m/099c8n	/award/award_category/nominees./award/award_nomination/nominated_for	/m/011yl_
/m/0f2zc	/people/person/places_lived./people/place_lived/location	/m/0kpys
/m/01hmnh	/media_common/netflix_genre/titles	/m/0p9lw
/m/03bx2lk	/film/film/release_date_s./film/film_regional_release_date/film_release_region	/m/03h64
/m/03rjj	/olympics/olympic_participating_country/medals_won./olympics/olympic_medal_honor/olympics	/m/0124ld
/m/01914	/location/location/contains	/m/0jhjl
/m/07l50vn	/film/film/release_date_s./film/film_regional_release_date/film_release_region	/m/03rt9
/m/011k1h	/music/record_label/artist	/m/02lbrd
/m/03_fk9	/people/person/nationality	/m/03rjj
/m/0bczgm	/people/person/profession	/m/0cbd2
/m/019v9k	/education/educational_degree/people_with_this_degree./education/education/major_field_of_study	/m/04306rv
/m/017yfz	/people/person/profession	/m/0cbd2
/m/0378zn	/film/actor/film./film/performance/film	/m/0bxxzb
/m/019f4v	/award/award_category/nominees./award/award_nomination/nominated_for	/m/01chpn
/m/06rkfs	/education/educational_institution/students_graduates./education/education/student	/m/04hpck
/m/02yxh9	/award/award_ceremony/awards_presented./award/award_honor/honored_for	/m/011ykb
/m/01vtj38	/people/person/profession	/m/0dz3r
/m/07vfqj	/sports/pro_athlete/teams./sports/sports_team_roster/team	/m/01gjlw
/m/03bxp5	/film/film/language	/m/04306rv
/m/05gjfk	/soccer/football_team/current_roster./soccer/football_roster_position/position	/m/02_j1w
/m/01tp5bj	/music/artist/track_contributions./music/track_contribution/role	/m/07y_7
/m/0b4lkx	/film/film/cinematography	/m/0854hr
/m/04btyz	/media_common/netflix_genre/titles	/m/02jkkv
/m/02g3gw	/award/award_category/nominees./award/award_nomination/nominated_for	/m/012kyx
/m/02jfc	/education/field_of_study/students_majoring./education/education/major_field_of_study	/m/06mq7
/m/034np8	/people/person/religion	/m/06nzl
/m/06rgq	/film/actor/film./film/performance/film	/m/03hfmm
/m/08wq0g	/people/person/profession	/m/09jwl
/m/02_j1w	/sports/sports_position/players./sports/sports_team_roster/team	/m/03fd8x
/m/0n2sh	/location/location/time_zones	/m/02hcv8
/m/01mr2g6	/people/person/profession	/m/0dz3r
/m/0gbfn9	/film/film/release_date_s./film/film_regional_release_date/film_release_region	/m/03gj2
/m/01wyz92	/base/popstra/celebrity/canoodled./base/popstra/canoodled/participant	/m/016pns
/m/017yfz	/influence/influence_node/influenced_by	/m/053yx
/m/0bw6y	/people/person/profession	/m/09jwl
/m/03mszl	/award/award_nominee/award_nominations./award/award_nomination/award_nominee	/m/02cx90
/m/0bjrnt	/education/educational_degree/people_with_this_degree./education/education/major_field_of_study	/m/0pf2
/m/01wgjj5	/music/artist/track_contributions./music/track_contribution/role	/m/07y_7
/m/075mb	/location/location/adjoin_s./location/adjoining_relationship/adjoins	/m/01hf6
/m/019f4v	/award/award_category/winners./award/award_honor/award_winner	/m/01f7j9
/m/0f6zs	/location/location/time_zones	/m/02hcv8
/m/02b15h	/soccer/football_team/current_roster./sports/sports_team_roster/position	/m/02_j1w
/m/0_565	/location/location/time_zones	/m/02hcv8
/m/07vn_9	/film/film/music	/m/07hgkd
/m/01g4yw	/organization/endowed_organization/endowment./measurement_unit/dated_money_value/currency	/m/01nv4h
/m/01mqh5	/base/popstra/celebrity/friendship./base/popstra/friendship/participant	/m/0n6f8
/m/018fq	/people/person/profession	/m/0cbd2
/m/0781g	/music/genre/artists	/m/0473q
/m/033cnk	/food/food/nutrients./food/nutrition_fact/nutrient	/m/0f4k5
/m/07_q87	/soccer/football_team/current_roster./sports/sports_team_roster/position	/m/02_j1w
/m/07szy	/education/educational_institution/colors	/m/01g5v
/m/02822	/education/field_of_study/students_majoring./education/education/major_field_of_study	/m/01zc2w
/m/05yjhm	/award/award_winner/awards_won./award/award_honor/award_winner	/m/06jvj7
/m/01v9l67	/award/award_nominee/award_nominations./award/award_nomination/award_nominee	/m/03ym1
/m/09k56b7	/film/film/release_date_s./film/film_regional_release_date/film_release_region	/m/03rt9
/m/03mkk4	/education/educational_degree/people_with_this_degree./education/education/student	/m/03xx9l
/m/0473q	/people/person/profession	/m/09jwl
/m/0yldt	/education/university/domestic_tuition./measurement_unit/dated_money_value/currency	/m/01nv4h
/m/01pg1d	/film/actor/film./film/performance/film	/m/011ycb
/m/02x73k6	/award/award_category/nominees./award/award_nomination/nominated_for	/m/011ycb
/m/01dljr	/location/location/time_zones	/m/02hcv8
/m/0m27n	/location/location/contains	/m/0qpqn
/m/0gj8nq2	/film/film/release_date_s./film/film_regional_release_date/film_release_region	/m/07t21
/m/016pns	/award/award_nominee/award_nominations./award/award_nomination/award	/m/02f764
/m/0g1rw	/award/award_nominee/award_nominations./award/award_nomination/nominated_for	/m/0n83s
/m/02661h	/people/person/place_of_birth	/m/01fscv
/m/033cnk	/food/food/nutrients./food/nutrition_fact/nutrient	/m/0838f
/m/011k1h	/organization/organization/headquarters./location/mailing_address/citytown	/m/04jpl
/m/03gj2	/location/location/adjoin_s./location/adjoining_relationship/adjoins	/m/07t21
/m/0k4f3	/film/film/other_crew./film/film_crew_gig/crewmember	/m/05x2t7
/m/02b10w	/soccer/football_team/current_roster./sports/sports_team_roster/position	/m/02_j1w
/m/02gf_l	/film/actor/film./film/performance/film	/m/0ds2n
/m/0h0wc	/award/award_nominee/award_nominations./award/award_nomination/award_nominee	/m/05dbf
/m/02x1dht	/award/award_category/nominees./award/award_nomination/nominated_for	/m/0gh8zks
/m/068cn	/base/aareas/schema/administrative_area/administrative_parent	/m/03rjj
/m/018yj6	/award/award_nominee/award_nominations./award/award_nomination/award_nominee	/m/0372kf
/m/04hk0w	/film/film/produced_by	/m/06dkzt
/m/04mwxk3	/business/business_operation/industry	/m/02vxn
/m/07s6fsf	/education/educational_degree/people_with_this_degree./education/education/institution	/m/011xy1
/m/0ft18	/film/film/language	/m/04306rv
/m/0gy4k	/film/film/release_date_s./film/film_regional_release_date/film_release_region	/m/06mkj
/m/0n5c9	/location/location/adjoin_s./location/adjoining_relationship/adjoins	/m/0n59t
/m/0g1rw	/film/film_distributor/films_distributed./film/film_film_distributor_relationship/film	/m/0639bg
/m/02hsq3m	/award/award_category/nominees./award/award_nomination/nominated_for	/m/09k56b7
/m/05zl0	/education/educational_institution/students_graduates./education/education/student	/m/0n00
/m/03mszl	/award/award_nominee/award_nominations./award/award_nomination/award_nominee	/m/01l03w2
/m/04shbh	/people/person/place_of_birth	/m/01423b
/m/051x52f	/award/award_nominee/award_nominations./award/award_nomination/award_nominee	/m/076lxv
/m/03f2_rc	/award/award_nominee/award_nominations./award/award_nomination/award_nominee	/m/01l3mk3
/m/02qhqz4	/film/film/story_by	/m/01vl17
/m/09p3_s	/film/film/edited_by	/m/0jgwf
/m/07s6fsf	/education/educational_degree/people_with_this_degree./education/education/institution	/m/02gr81
/m/02tr7d	/award/award_winner/awards_won./award/award_honor/award_winner	/m/02lfns
/m/0j0k	/location/location/contains	/m/02hwww
/m/07v64s	/music/genre/artists	/m/0kzy0
/m/02_7t	/education/field_of_study/students_majoring./education/education/major_field_of_study	/m/02822
/m/026t6	/music/instrument/instrumentalists	/m/05cljf
/m/02ctzb	/people/ethnicity/people	/m/02l3_5
/m/03_fk9	/people/person/profession	/m/0dgd_
/m/03558l	/sports/sports_position/players./sports/sports_team_roster/team	/m/0jm74
/m/07l50vn	/award/award_winning_work/awards_won./award/award_honor/award	/m/0gqng
/m/0f5xn	/award/award_nominee/award_nominations./award/award_nomination/award	/m/0gqy2
/m/02681_5	/award/award_category/winners./award/award_honor/ceremony	/m/08pc1x
/m/06cgf	/film/film/dubbing_performances./film/dubbing_performance/actor	/m/017vkx
/m/0y_9q	/award/award_winning_work/awards_won./award/award_honor/award_winner	/m/01cbt3
/m/0fwc0	/location/location/time_zones	/m/02hcv8
/m/067ghz	/film/film/release_date_s./film/film_regional_release_date/film_release_region	/m/05r4w
/m/01yjl	/sports/professional_sports_team/draft_picks./sports/sports_league_draft_pick/school	/m/07vyf
/m/0d6lp	/location/location/time_zones	/m/02lcqs
/m/029sk	/medicine/disease/notable_people_with_this_condition	/m/034x61
/m/0266bd5	/soccer/football_team/current_roster./sports/sports_team_roster/position	/m/02_j1w
/m/02py4c8	/tv/tv_program/regular_cast./tv/regular_tv_appearance/actor	/m/0159h6
/m/02mc79	/award/award_nominee/award_nominations./award/award_nomination/award_nominee	/m/017s11
/m/04yg13l	/film/film/country	/m/0345h
/m/034x61	/film/actor/film./film/performance/film	/m/0d4htf
/m/0f5xn	/film/actor/film./film/performance/film	/m/02qhqz4
/m/07vfz	/organization/organization/headquarters./location/mailing_address/citytown	/m/0d6lp
/m/033tf_	/people/ethnicity/people	/m/03pp73
/m/0gz5hs	/award/award_nominee/award_nominations./award/award_nomination/award	/m/0h3vhfb
/m/03_fk9	/award/award_nominee/award_nominations./award/award_nomination/award	/m/0gr0m
/m/048cl	/people/deceased_person/place_of_death	/m/04jpl
/m/05dss7	/film/film/release_date_s./film/film_regional_release_date/film_regional_debut_venue	/m/0kfhjq0
/m/0fb1q	/people/person/place_of_birth	/m/0cc56
/m/04j_h4	/music/genre/artists	/m/01vt5c_
/m/0n59t	/location/location/time_zones	/m/02hcv8
/m/0c0tzp	/award/award_nominee/award_nominations./award/award_nomination/award	/m/0gq_v
/m/01rlzn	/soccer/football_team/current_roster./soccer/football_roster_position/position	/m/02_j1w
/m/02j3d4	/award/award_nominee/award_nominations./award/award_nomination/award_nominee	/m/011zf2
/m/01cgz	/olympics/olympic_sport/athletes./olympics/olympic_athlete_affiliation/country	/m/03gj2
/m/01tzm9	/film/actor/film./film/performance/film	/m/0639bg
/m/02d42t	/people/person/places_lived./people/place_lived/location	/m/04jpl
/m/03c602	/award/award_winner/awards_won./award/award_honor/award_winner	/m/01wyq0w
/m/070w7s	/award/award_nominee/award_nominations./award/award_nomination/award_nominee	/m/04gtdnh
/m/0kv5t	/location/location/time_zones	/m/02lcqs
/m/02hxhz	/award/award_winning_work/awards_won./award/award_honor/award	/m/05zvj3m
/m/0pk41	/music/artist/contribution./music/recording_contribution/performance_role	/m/03bx0bm
/m/0fkzq	/government/government_office_category/officeholders./government/government_position_held/jurisdiction_of_office	/m/026mj
/m/02mjf2	/film/actor/film./film/performance/film	/m/09p4w8
/m/04wvhz	/award/award_nominee/award_nominations./award/award_nomination/award	/m/0cjyzs
/m/0g1rw	/business/business_operation/industry	/m/02vxn
/m/02lnbg	/music/genre/artists	/m/01wyz92
/m/01s73z	/award/ranked_item/appears_in_ranked_lists./award/ranking/list	/m/04k4rt
/m/02pxst	/film/film/release_date_s./film/film_regional_release_date/film_release_region	/m/05r4w
/m/0l12d	/base/popstra/celebrity/friendship./base/popstra/friendship/participant	/m/018x3
/m/0g1rw	/film/film_distributor/films_distributed./film/film_film_distributor_relationship/film	/m/0glbqt
/m/0rql_	/location/location/time_zones	/m/02hcv8
/m/01k70_	/award/award_nominee/award_nominations./award/award_nomination/award_nominee	/m/02pt6k_
/m/01pcq3	/award/award_nominee/award_nominations./award/award_nomination/award_nominee	/m/0372kf
/m/026n998	/award/award_nominee/award_nominations./award/award_nomination/award_nominee	/m/0265vcb
/m/06wvj	/people/person/places_lived./people/place_lived/location	/m/0d6lp
/m/01vw_dv	/base/popstra/celebrity/friendship./base/popstra/friendship/participant	/m/095b70
/m/0m_v0	/award/award_nominee/award_nominations./award/award_nomination/award_nominee	/m/02cx90
/m/02j9lm	/award/award_nominee/award_nominations./award/award_nomination/nominated_for	/m/02chhq
/m/048cl	/influence/influence_node/influenced_by	/m/03sbs
/m/09byk	/people/person/places_lived./people/place_lived/location	/m/0k3p
/m/0lpk3	/location/location/time_zones	/m/02hcv8
/m/03bwzr4	/education/educational_degree/people_with_this_degree./education/education/student	/m/084w8
/m/0gq9h	/award/award_category/nominees./award/award_nomination/nominated_for	/m/0kvb6p
/m/0gjv_	/education/educational_institution/students_graduates./education/education/student	/m/0hpz8
/m/034x61	/award/award_nominee/award_nominations./award/award_nomination/nominated_for	/m/0d4htf
/m/01vhb0	/base/popstra/celebrity/canoodled./base/popstra/canoodled/participant	/m/06rgq
/m/0345h	/location/location/contains	/m/01c0cc
/m/0fpzwf	/sports/sports_team_location/teams	/m/0jmgb
/m/0fpv_3_	/award/award_winning_work/awards_won./award/award_honor/award	/m/02hsq3m
/m/035zr0	/film/film/release_date_s./film/film_regional_release_date/film_release_region	/m/0gqfy
/m/01m5m5b	/award/award_nominee/award_nominations./award/award_nomination/nominated_for	/m/0fpv_3_
/m/0l14j_	/music/instrument/instrumentalists	/m/01tp5bj
/m/01k5t_3	/award/award_nominee/award_nominations./award/award_nomination/award_nominee	/m/03mszl
/m/049n2l	/soccer/football_team/current_roster./soccer/football_roster_position/position	/m/02_j1w
/m/01q7q2	/education/educational_institution/students_graduates./education/education/major_field_of_study	/m/0fdys
/m/0425_d	/soccer/football_team/current_roster./soccer/football_roster_position/position	/m/02_j1w
/m/01cm8w	/film/film/release_date_s./film/film_regional_release_date/film_release_region	/m/03rjj
/m/0863x_	/award/award_nominee/award_nominations./award/award_nomination/award_nominee	/m/0gkydb
/m/01z0rcq	/base/popstra/celebrity/dated./base/popstra/dated/participant	/m/0237fw
/m/04jpk2	/film/film/costume_design_by	/m/02vkvcz
/m/06y611	/film/film/music	/m/02jxkw
/m/026t6	/music/performance_role/track_performances./music/track_contribution/role	/m/0jtg0
/m/01wyz92	/award/award_nominee/award_nominations./award/award_nomination/award_nominee	/m/0127s7
/m/098r1q	/soccer/football_team/current_roster./soccer/football_roster_position/position	/m/02_j1w
/m/0d6b7	/film/film/release_date_s./film/film_regional_release_date/film_regional_debut_venue	/m/09rwjly
/m/017s11	/film/film_distributor/films_distributed./film/film_film_distributor_relationship/film	/m/026zlh9
/m/0dt_q_	/soccer/football_team/current_roster./soccer/football_roster_position/position	/m/02_j1w
/m/02dlh2	/music/performance_role/regular_performances./music/group_membership/group	/m/0163m1
/m/03pmzt	/people/person/place_of_birth	/m/0f94t
/m/01vsps	/people/person/places_lived./people/place_lived/location	/m/096gm
/m/019v9k	/education/educational_degree/people_with_this_degree./education/education/institution	/m/02pbzv
/m/030_1_	/business/business_operation/industry	/m/02vxn
/m/0zjpz	/people/person/spouse_s./people/marriage/spouse	/m/017m2y
/m/01v40wd	/award/award_nominee/award_nominations./award/award_nomination/award_nominee	/m/02l840
/m/017f4y	/people/person/profession	/m/09jwl
/m/0345h	/location/location/contains	/m/07nf6
/m/031q3w	/education/educational_institution/students_graduates./education/education/student	/m/041mt
/m/01qzyz	/music/performance_role/regular_performances./music/group_membership/role	/m/03bx0bm
/m/01vg13	/education/educational_institution/students_graduates./education/education/student	/m/02lfns
/m/0by1wkq	/film/film/release_date_s./film/film_regional_release_date/film_release_region	/m/06mkj
/m/0f4vx	/award/award_winning_work/awards_won./award/award_honor/award	/m/02w9sd7
/m/06jw0s	/award/award_nominee/award_nominations./award/award_nomination/award_nominee	/m/047q2wc
/m/033hn8	/music/record_label/artist	/m/017lb_
/m/04shbh	/film/actor/film./film/performance/film	/m/026hh0m
/m/05yjhm	/award/award_nominee/award_nominations./award/award_nomination/award_nominee	/m/02qssrm
/m/099c8n	/award/award_category/nominees./award/award_nomination/nominated_for	/m/09cr8
/m/0154fs	/location/location/time_zones	/m/02hcv8
/m/017s11	/film/film_distributor/films_distributed./film/film_film_distributor_relationship/film	/m/03cfkrw
/m/024mxd	/award/award_nominated_work/award_nominations./award/award_nomination/nominated_for	/m/0d_wms
/m/01q8wk7	/people/person/place_of_birth	/m/0cvw9
/m/04sv4	/business/business_operation/industry	/m/019z7b
/m/05c5xx9	/sports/sports_team/roster./american_football/football_historical_roster_position/position_s	/m/02g_6j
/m/0gh65c5	/film/film/country	/m/0345h
/m/01xllf	/film/actor/film./film/performance/film	/m/0cwfgz
/m/01q7cb_	/base/popstra/celebrity/canoodled./base/popstra/canoodled/participant	/m/0127s7
/m/01cgz	/olympics/olympic_sport/athletes./olympics/olympic_athlete_affiliation/country	/m/03shp
/m/02tk74	/people/person/sibling_s./people/sibling_relationship/sibling	/m/03f4w4
/m/0278x6s	/award/award_nominee/award_nominations./award/award_nomination/award_nominee	/m/06151l
/m/02rn00y	/film/film/genre	/m/01hmnh
/m/07d370	/award/award_nominee/award_nominations./award/award_nomination/award_nominee	/m/0grmhb
/m/05dbf	/award/award_winner/awards_won./award/award_honor/award_winner	/m/0h0wc
/m/06rpd	/sports/sports_team/roster./american_football/football_historical_roster_position/position_s	/m/02g_6j
/m/011k_j	/music/performance_role/track_performances./music/track_contribution/role	/m/0dwt5
/m/09sh8k	/film/film/featured_film_locations	/m/04jpl
/m/07tj4c	/film/film/music	/m/01l79yc
/m/015zyd	/education/educational_institution/students_graduates./education/education/student	/m/01_f_5
/m/01pcq3	/film/actor/film./film/performance/film	/m/0d90m
/m/07f8wg	/award/award_nominee/award_nominations./award/award_nomination/award_nominee	/m/017s11
/m/017gm7	/film/film/produced_by	/m/02bfxb
/m/033hn8	/music/record_label/artist	/m/01wg25j
/m/0gr0m	/award/award_category/nominees./award/award_nomination/nominated_for	/m/07nt8p
/m/011j5x	/music/genre/artists	/m/02cpp
/m/019f4v	/award/award_category/nominees./award/award_nomination/nominated_for	/m/0168ls
/m/033cnk	/food/food/nutrients./food/nutrition_fact/nutrient	/m/0f4l5
/m/08pth9	/award/award_nominee/award_nominations./award/award_nomination/award_nominee	/m/04kr63w
/m/0f5xn	/award/award_nominee/award_nominations./award/award_nomination/award	/m/02x73k6
/m/0465_	/people/person/places_lived./people/place_lived/location	/m/06q1r
/m/0486tv	/olympics/olympic_sport/athletes./olympics/olympic_athlete_affiliation/country	/m/03rjj
/m/04v68c	/soccer/football_player/current_team./sports/sports_team_roster/team	/m/0ckf6
/m/04x1_w	/people/person/nationality	/m/03rt9
/m/0cmc26r	/film/film/release_date_s./film/film_regional_release_date/film_release_region	/m/03h64
/m/09_94	/olympics/olympic_sport/athletes./olympics/olympic_athlete_affiliation/country	/m/03rjj
/m/0fkzq	/government/government_office_category/officeholders./government/government_position_held/jurisdiction_of_office	/m/05fkf
/m/023fb	/soccer/football_team/current_roster./sports/sports_team_roster/position	/m/02_j1w
/m/0khth	/award/award_nominee/award_nominations./award/award_nomination/award	/m/02ddq4
/m/04gtdnh	/award/award_nominee/award_nominations./award/award_nomination/award_nominee	/m/026n998
/m/05dbf	/award/award_nominee/award_nominations./award/award_nomination/nominated_for	/m/026qnh6
/m/02d4ct	/film/actor/film./film/performance/film	/m/0b2v79
/m/018yj6	/award/award_winner/awards_won./award/award_honor/award_winner	/m/01pcq3
/m/0473q	/people/person/profession	/m/0dz3r
/m/05cljf	/people/person/profession	/m/09jwl
/m/01wp8w7	/people/person/profession	/m/09jwl
/m/02ps55	/education/educational_institution/students_graduates./education/education/student	/m/02hfp_
/m/03bx0bm	/music/performance_role/regular_performances./music/group_membership/role	/m/07y_7
/m/0hx4y	/film/film/release_date_s./film/film_regional_release_date/film_release_region	/m/03h64
/m/0854hr	/award/award_nominee/award_nominations./award/award_nomination/nominated_for	/m/0b4lkx
/m/033tf_	/people/ethnicity/people	/m/034x61
/m/0bwhdbl	/film/film/production_companies	/m/032j_n
/m/02tr7d	/film/actor/film./film/performance/film	/m/011yr9
/m/01cbt3	/award/award_nominee/award_nominations./award/award_nomination/award_nominee	/m/06rrzn
/m/01l03w2	/award/award_nominee/award_nominations./award/award_nomination/award_nominee	/m/03mszl
/m/03ksy	/education/educational_institution/students_graduates./education/education/student	/m/0fpj4lx
/m/0b005	/tv/tv_program/regular_cast./tv/regular_tv_appearance/actor	/m/01w1ywm
/m/01vg13	/education/educational_institution/students_graduates./education/education/major_field_of_study	/m/09s1f
/m/0y_9q	/award/award_winning_work/awards_won./award/award_honor/award	/m/0gq9h
/m/013q07	/award/award_winning_work/awards_won./award/award_honor/award	/m/05zvj3m
/m/09xb4h	/soccer/football_team/current_roster./soccer/football_roster_position/position	/m/02_j1w
/m/046f3p	/film/film/country	/m/0345h
/m/0gq9h	/award/award_category/winners./award/award_honor/ceremony	/m/0fk0xk
/m/0gqy2	/award/award_category/nominees./award/award_nomination/nominated_for	/m/035yn8
/m/01vj9c	/music/performance_role/regular_performances./music/group_membership/group	/m/0163m1
/m/07_q87	/soccer/football_team/current_roster./soccer/football_roster_position/position	/m/02_j1w
/m/01vj9c	/music/performance_role/track_performances./music/track_contribution/role	/m/01qzyz
/m/033tf_	/people/ethnicity/people	/m/02pjvc
/m/0bynt	/olympics/olympic_sport/athletes./olympics/olympic_athlete_affiliation/country	/m/07dvs
/m/02fsn	/music/performance_role/track_performances./music/track_contribution/role	/m/02dlh2
/m/0kvgtf	/film/film/genre	/m/01hmnh
/m/0gj8nq2	/film/film/release_date_s./film/film_regional_release_date/film_release_region	/m/05sb1
/m/025v1sx	/sports/sports_team/roster./american_football/football_historical_roster_position/position_s	/m/02g_6j
/m/01hmnh	/media_common/netflix_genre/titles	/m/0d90m
/m/0gq9h	/award/award_category/nominees./award/award_nomination/nominated_for	/m/0bl5c
/m/0mwxz	/location/location/time_zones	/m/02hcv8
/m/01hkhq	/award/award_nominee/award_nominations./award/award_nomination/award_nominee	/m/05cj4r
/m/02hsq3m	/award/award_category/nominees./award/award_nomination/nominated_for	/m/01vksx
/m/03h_fk5	/award/award_nominee/award_nominations./award/award_nomination/award	/m/02ddq4
/m/016pns	/award/award_nominee/award_nominations./award/award_nomination/award	/m/03t5kl
/m/0m32h	/medicine/disease/risk_factors	/m/0fltx
/m/026t6	/music/performance_role/regular_performances./music/group_membership/group	/m/0l8g0
/m/076lxv	/award/award_nominee/award_nominations./award/award_nomination/award_nominee	/m/051x52f
/m/06rgq	/people/person/profession	/m/09jwl
/m/030_1_	/award/award_nominee/award_nominations./award/award_nomination/award	/m/02x1z2s
/m/01vw87c	/base/popstra/celebrity/friendship./base/popstra/friendship/participant	/m/0zjpz
/m/02jxrw	/award/award_winning_work/awards_won./award/award_honor/award_winner	/m/07j8kh
/m/015mlw	/music/record_label/artist	/m/03h_fk5
/m/01hmnh	/media_common/netflix_genre/titles	/m/0fvr1
/m/04jpl	/location/location/contains	/m/0gjv_
/m/037hgm	/music/artist/track_contributions./music/track_contribution/role	/m/01vj9c
/m/0gq9h	/award/award_category/nominees./award/award_nomination/nominated_for	/m/0ptxj
/m/0g1rw	/film/film_distributor/films_distributed./film/film_film_distributor_relationship/film	/m/08ct6
/m/09gkdln	/award/award_ceremony/awards_presented./award/award_honor/honored_for	/m/02q52q
/m/0dll_t2	/film/film/release_date_s./film/film_regional_release_date/film_release_region	/m/05r4w
/m/06q07	/business/business_operation/industry	/m/019z7b
/m/0b4lkx	/award/award_winning_work/awards_won./award/award_honor/award	/m/02x73k6
/m/01q7cb_	/people/person/places_lived./people/place_lived/location	/m/05fkf
/m/02v0ff	/people/person/places_lived./people/place_lived/location	/m/0ccvx
/m/0j_sncb	/education/educational_institution/students_graduates./education/education/major_field_of_study	/m/029g_vk
/m/01sl1q	/award/award_nominee/award_nominations./award/award_nomination/award_nominee	/m/03_wtr
/m/01vc5m	/education/educational_institution/students_graduates./education/education/major_field_of_study	/m/06mq7
/m/04bdzg	/people/person/place_of_birth	/m/0ftvg
/m/0g1rw	/film/film_distributor/films_distributed./film/film_film_distributor_relationship/film	/m/0dc7hc
/m/0fp_xp	/soccer/football_player/current_team./sports/sports_team_roster/team	/m/0223bl
/m/0hwqz	/base/popstra/celebrity/dated./base/popstra/dated/participant	/m/01wgjj5
/m/01w40h	/music/record_label/artist	/m/011xhx
/m/01t04r	/music/record_label/artist	/m/0163m1
/m/0_vn7	/location/location/time_zones	/m/02hcv8
/m/0c3p7	/base/popstra/celebrity/dated./base/popstra/dated/participant	/m/0170s4
/m/02_j1w	/sports/sports_position/players./sports/sports_team_roster/team	/m/0ljbg
/m/0gr0m	/award/award_category/nominees./award/award_nomination/nominated_for	/m/08xvpn
/m/011j5x	/music/genre/artists	/m/01whg97
/m/0bynt	/olympics/olympic_sport/athletes./olympics/olympic_athlete_affiliation/country	/m/03gj2
/m/07vyf	/education/educational_institution/students_graduates./education/education/major_field_of_study	/m/06mq7
/m/06rrzn	/award/award_nominee/award_nominations./award/award_nomination/award_nominee	/m/01cbt3
/m/0glt670	/music/genre/artists	/m/01q7cb_
/m/0n5by	/location/location/time_zones	/m/02hcv8
/m/01z0rcq	/base/popstra/celebrity/breakup./base/popstra/breakup/participant	/m/0237fw
/m/02mz_6	/award/award_nominee/award_nominations./award/award_nomination/award	/m/09v51c2
/m/0gq9h	/award/award_category/nominees./award/award_nomination/nominated_for	/m/011yqc
/m/01lct6	/people/person/places_lived./people/place_lived/location	/m/0fpzwf
/m/080dwhx	/tv/tv_program/regular_cast./tv/regular_tv_appearance/actor	/m/02tr7d
/m/04h4c9	/film/film/other_crew./film/film_crew_gig/film_crew_role	/m/02_n3z
/m/01w56k	/music/record_label/artist	/m/01wp8w7
/m/0f6zs	/location/location/adjoin_s./location/adjoining_relationship/adjoins	/m/0dlhg
/m/024rwx	/tv/tv_program/regular_cast./tv/regular_tv_appearance/actor	/m/01rcmg
/m/0gd9k	/award/award_nominee/award_nominations./award/award_nomination/nominated_for	/m/0p9lw
/m/03c3jzx	/military/military_conflict/combatants./military/military_combatant_group/combatants	/m/03gj2
/m/0bcp9b	/film/film/release_date_s./film/film_regional_release_date/film_release_region	/m/03rjj
/m/0gr0m	/award/award_category/winners./award/award_honor/ceremony	/m/02yxh9
/m/083p7	/people/person/religion	/m/051kv
/m/07sqbl	/soccer/football_team/current_roster./soccer/football_roster_position/position	/m/02_j1w
/m/02_j1w	/sports/sports_position/players./sports/sports_team_roster/team	/m/049n2l
/m/0l12d	/people/person/profession	/m/0dz3r
/m/02pxst	/film/film/language	/m/03_9r
/m/02x8s9	/people/person/profession	/m/0cbd2
/m/0345h	/location/location/contains	/m/070zc
/m/01wyz92	/celebrities/celebrity/celebrity_friends./celebrities/friendship/friend	/m/0127s7
/m/0gy3w	/education/educational_institution/students_graduates./education/education/major_field_of_study	/m/02_7t
/m/02_j1w	/sports/sports_position/players./sports/sports_team_roster/team	/m/023fb
/m/0lkr7	/award/award_nominee/award_nominations./award/award_nomination/award	/m/02x4w6g
/m/035yn8	/film/film/release_date_s./film/film_regional_release_date/film_release_region	/m/05r4w
/m/0dwt5	/music/performance_role/track_performances./music/track_contribution/role	/m/03q5t
/m/01_gv	/sports/sports_team/colors	/m/01g5v
/m/06vsbt	/award/award_winner/awards_won./award/award_honor/award_winner	/m/08pth9
/m/0275_pj	/award/award_nominee/award_nominations./award/award_nomination/award_nominee	/m/04gtdnh
/m/03h2c	/location/location/adjoin_s./location/adjoining_relationship/adjoins	/m/0345_
/m/01gjlw	/soccer/football_team/current_roster./sports/sports_team_roster/position	/m/02_j1w
/m/024mpp	/film/film/release_date_s./film/film_regional_release_date/film_release_region	/m/03gj2
/m/01sb5r	/people/person/profession	/m/0dz3r
/m/0jsg0m	/people/person/profession	/m/09jwl
/m/016dp0	/people/person/profession	/m/0cbd2
/m/035zr0	/film/film/release_date_s./film/film_regional_release_date/film_release_region	/m/03h64
/m/07s95_l	/award/award_nominee/award_nominations./award/award_nomination/award_nominee	/m/08pth9
/m/08b0cj	/soccer/football_player/current_team./sports/sports_team_roster/team	/m/04kn29
/m/01vj9c	/music/performance_role/regular_performances./music/group_membership/role	/m/0l14j_
/m/0hwqz	/base/popstra/celebrity/dated./base/popstra/dated/participant	/m/02lf1j
/m/09v51c2	/award/award_category/winners./award/award_honor/award_winner	/m/069_0y
/m/02x1z2s	/award/award_category/nominees./award/award_nomination/nominated_for	/m/02rb84n
/m/047q2wc	/award/award_nominee/award_nominations./award/award_nomination/award_nominee	/m/02pt6k_
/m/013t9y	/award/award_nominee/award_nominations./award/award_nomination/award	/m/0gq9h
/m/02_j1w	/sports/sports_position/players./sports/sports_team_roster/team	/m/02_cq0
/m/06lvlf	/award/award_winner/awards_won./award/award_honor/award_winner	/m/02t_v1
/m/0c921	/award/award_nominee/award_nominations./award/award_nomination/award_nominee	/m/06l6nj
/m/01xllf	/film/actor/film./film/performance/film	/m/0bxsk
/m/01w03jv	/music/artist/origin	/m/0d6lp
/m/035yn8	/film/film/release_date_s./film/film_regional_release_date/film_release_region	/m/0345h
/m/0m4yg	/education/educational_institution/students_graduates./education/education/student	/m/04shbh
/m/0flw6	/award/award_nominee/award_nominations./award/award_nomination/award	/m/0gqy2
/m/03xx3m	/award/award_nominee/award_nominations./award/award_nomination/award	/m/0gqy2
/m/015l4k	/user/jg/default_domain/olympic_games/sports	/m/09_94
/m/01hkhq	/award/award_winner/awards_won./award/award_honor/award_winner	/m/05cj4r
/m/03bx2lk	/film/film/release_date_s./film/film_regional_release_date/film_release_region	/m/06mkj
/m/0lcx	/influence/influence_node/influenced_by	/m/048cl
/m/09gkdln	/award/award_ceremony/awards_presented./award/award_honor/award_winner	/m/016yvw
/m/016zgj	/music/genre/artists	/m/0khth
/m/0hcvy	/people/person/profession	/m/0cbd2
/m/06q1r	/location/location/contains	/m/01z9j2
/m/06vsbt	/award/award_nominee/award_nominations./award/award_nomination/award_nominee	/m/07s95_l
/m/0d_wms	/award/award_nominated_work/award_nominations./award/award_nomination/nominated_for	/m/042g97
/m/02bp37	/government/legislative_session/members./government/government_position_held/district_represented	/m/05kj_
/m/0bjrnt	/education/educational_degree/people_with_this_degree./education/education/major_field_of_study	/m/02jfc
/m/0dxyzb	/soccer/football_team/current_roster./soccer/football_roster_position/position	/m/02_j1w
/m/02d42t	/award/award_nominee/award_nominations./award/award_nomination/award	/m/0fq9zdn
/m/0c3xw46	/film/film/release_date_s./film/film_regional_release_date/film_release_region	/m/03gj2
/m/06rny	/sports/sports_team/roster./american_football/football_historical_roster_position/position_s	/m/02g_6j
/m/04lhc4	/award/award_winning_work/awards_won./award/award_honor/award	/m/02z1nbg
/m/03pp73	/people/person/profession	/m/09jwl
/m/01y998	/military/military_conflict/combatants./military/military_combatant_group/combatants	/m/0bxjv
/m/02qsjt	/music/artist/track_contributions./music/track_contribution/role	/m/0jtg0
/m/03_gz8	/film/film/prequel	/m/011yr9
/m/0mw2m	/location/location/time_zones	/m/02hcv8
/m/01rnly	/film/film/music	/m/01cbt3
/m/0b_71r	/base/marchmadness/ncaa_basketball_tournament/seeds./base/marchmadness/ncaa_tournament_seed/team	/m/02pzy52
/m/02lfns	/award/award_nominee/award_nominations./award/award_nomination/award_nominee	/m/01dy7j
/m/0hskw	/award/award_nominee/award_nominations./award/award_nomination/award	/m/019f4v
/m/0pj9t	/award/award_nominee/award_nominations./award/award_nomination/award	/m/0gqy2
/m/02j3d4	/people/person/place_of_birth	/m/013kcv
/m/0glt670	/music/genre/artists	/m/0127s7
/m/02z1nbg	/award/award_category/winners./award/award_honor/award_winner	/m/0159h6
/m/070zc	/location/administrative_division/country	/m/0345h
/m/011ycb	/film/film/release_date_s./film/film_regional_release_date/film_release_region	/m/03rt9
/m/02vr3gz	/film/film/release_date_s./film/film_regional_release_date/film_release_region	/m/0345h
/m/0by1wkq	/film/film/release_date_s./film/film_regional_release_date/film_release_region	/m/03rt9
/m/0127s7	/base/popstra/celebrity/friendship./base/popstra/friendship/participant	/m/01wyz92
/m/03_wvl	/award/award_nominee/award_nominations./award/award_nomination/award_nominee	/m/03_wtr
/m/0373qg	/education/educational_institution/students_graduates./education/education/major_field_of_study	/m/01zc2w
/m/098r1q	/soccer/football_team/current_roster./sports/sports_team_roster/position	/m/02_j1w
/m/0bh8tgs	/film/film/release_date_s./film/film_regional_release_date/film_release_region	/m/03rjj
/m/083skw	/film/film/genre	/m/082gq
/m/047q2wc	/award/award_winner/awards_won./award/award_honor/award_winner	/m/05yjhm
/m/05qjt	/education/field_of_study/students_majoring./education/education/major_field_of_study	/m/0pf2
/m/08j7lh	/film/film/country	/m/03h64
/m/056878	/award/award_ceremony/awards_presented./award/award_honor/award_winner	/m/044gyq
/m/03ksy	/education/educational_institution/students_graduates./education/education/student	/m/02vq8xn
/m/09p3_s	/award/award_winning_work/awards_won./award/award_honor/award	/m/02z1nbg
/m/0glt670	/music/genre/artists	/m/01vt5c_
/m/0mmpz	/location/location/adjoin_s./location/adjoining_relationship/adjoins	/m/0mmpm
/m/0f5xn	/film/actor/film./film/performance/film	/m/02jkkv
/m/032016	/film/film/genre	/m/01hmnh
/m/0gmtm	/base/popstra/celebrity/dated./base/popstra/dated/participant	/m/012gbb
/m/0h0wc	/film/actor/film./film/performance/film	/m/01chpn
/m/0584r4	/tv/tv_program/regular_cast./tv/regular_tv_appearance/actor	/m/0gz5hs
/m/0fb1q	/award/award_nominee/award_nominations./award/award_nomination/award_nominee	/m/0hskw
/m/05kkh	/location/location/contains	/m/02txdf
/m/02rn00y	/film/film/other_crew./film/film_crew_gig/film_crew_role	/m/033smt
/m/028d4v	/film/actor/film./film/performance/film	/m/02ht1k
/m/01vl17	/people/person/profession	/m/01nxfc
/m/0mwk9	/location/location/time_zones	/m/02hcv8
/m/0gr0m	/award/award_category/nominees./award/award_nomination/nominated_for	/m/07gp9
/m/099d4	/people/person/places_lived./people/place_lived/location	/m/03h64
/m/0_nh2	/location/location/time_zones	/m/02hcv8
/m/02mjf2	/award/award_nominee/award_nominations./award/award_nomination/nominated_for	/m/09p4w8
/m/0d8_wz	/soccer/football_team/current_roster./sports/sports_team_roster/position	/m/02_j1w
/m/07szy	/education/educational_institution/students_graduates./education/education/student	/m/03xx9l
/m/03q5t	/music/instrument/instrumentalists	/m/032t2z
/m/0g1rw	/award/award_nominee/award_nominations./award/award_nomination/award	/m/0gq_d
/m/03bx2lk	/film/film/release_date_s./film/film_regional_release_date/film_release_region	/m/0345h
/m/02zk08	/film/film/production_companies	/m/0g1rw
/m/0xjl2	/music/genre/artists	/m/01wxdn3
/m/0gh8zks	/film/film/release_date_s./film/film_regional_release_date/film_release_region	/m/03rt9
/m/0l14j_	/music/performance_role/regular_performances./music/group_membership/group	/m/03k3b
/m/05mrf_p	/film/film/country	/m/0345h
/m/09lwrt	/award/award_nominee/award_nominations./award/award_nomination/award	/m/01c9jp
/m/05cwl_	/education/educational_institution/students_graduates./education/education/student	/m/0c6g29
/m/0qpqn	/location/hud_county_place/county	/m/0m27n
/m/01p1z_	/award/award_nominee/award_nominations./award/award_nomination/award	/m/019f4v
/m/02cm2m	/award/award_nominee/award_nominations./award/award_nomination/award_nominee	/m/0gz5hs
/m/04_cdd	/soccer/football_team/current_roster./sports/sports_team_roster/position	/m/02_j1w
/m/0h1fktn	/film/film/personal_appearances./film/personal_film_appearance/person	/m/03h3vtz
/m/0dqzkv	/award/award_nominee/award_nominations./award/award_nomination/award	/m/0gr0m
/m/01t6xz	/award/award_winner/awards_won./award/award_honor/award_winner	/m/01z_g6
/m/016zgj	/music/genre/artists	/m/017f4y
/m/019v9k	/education/educational_degree/people_with_this_degree./education/education/institution	/m/01t0dy
/m/04bdzg	/film/actor/film./film/performance/film	/m/024mpp
/m/0cjyzs	/award/award_category/nominees./award/award_nomination/nominated_for	/m/0557yqh
/m/0584r4	/award/award_winning_work/awards_won./award/award_honor/award	/m/0h3vhfb
/m/0237fw	/people/person/place_of_birth	/m/062qg
/m/033cnk	/food/food/nutrients./food/nutrition_fact/nutrient	/m/025sf8g
/m/0fbw6	/food/food/nutrients./food/nutrition_fact/nutrient	/m/0g5gq
/m/0grwj	/celebrities/celebrity/celebrity_friends./celebrities/friendship/friend	/m/012x4t
/m/0v9qg	/location/location/time_zones	/m/02hcv8
/m/0486tv	/olympics/olympic_sport/athletes./olympics/olympic_athlete_affiliation/country	/m/04sj3
/m/09jwl	/tv/non_character_role/tv_regular_personal_appearances./tv/tv_regular_personal_appearance/person	/m/01wdqrx
/m/03gdf1	/organization/organization/headquarters./location/mailing_address/citytown	/m/0cvw9
/m/01f7j9	/award/award_nominee/award_nominations./award/award_nomination/award_nominee	/m/01zwy
/m/0125xq	/film/film/release_date_s./film/film_regional_release_date/film_release_region	/m/03rt9
/m/06q07	/award/ranked_item/appears_in_ranked_lists./award/ranking/list	/m/04k4rt
/m/0125xq	/film/film/release_date_s./film/film_regional_release_date/film_release_region	/m/03h64
/m/03mkk4	/education/educational_degree/people_with_this_degree./education/education/institution	/m/07szy
/m/08h79x	/award/award_nominee/award_nominations./award/award_nomination/nominated_for	/m/016y_f
/m/033tf_	/people/ethnicity/people	/m/01vrt_c
/m/06vsbt	/award/award_winner/awards_won./award/award_honor/award_winner	/m/04kr63w
/m/0418154	/award/award_ceremony/awards_presented./award/award_honor/award_winner	/m/0qf43
/m/0_jq4	/location/location/time_zones	/m/02hcv8
/m/02mc79	/award/award_nominee/award_nominations./award/award_nomination/award_nominee	/m/02_l96
/m/01z3d2	/location/location/contains	/m/019vsw
/m/017vkx	/music/group_member/membership./music/group_membership/role	/m/03bx0bm
/m/03rjj	/olympics/olympic_participating_country/medals_won./olympics/olympic_medal_honor/olympics	/m/015l4k
/m/02qssrm	/award/award_nominee/award_nominations./award/award_nomination/award_nominee	/m/06jw0s
/m/01314k	/education/university/domestic_tuition./measurement_unit/dated_money_value/currency	/m/01nv4h
/m/0372kf	/award/award_nominee/award_nominations./award/award_nomination/nominated_for	/m/05jf85
/m/03rbzn	/olympics/olympic_sport/athletes./olympics/olympic_athlete_affiliation/country	/m/03gj2
/m/0cd25	/people/cause_of_death/people	/m/0m_31
/m/07ykkx5	/film/film/other_crew./film/film_crew_gig/film_crew_role	/m/02_n3z
/m/09d5h	/tv/tv_network/programs./tv/tv_network_duration/program	/m/0kfpm
/m/07y_7	/music/performance_role/regular_performances./music/group_membership/role	/m/0l14j_
/m/03rjj	/olympics/olympic_participating_country/medals_won./olympics/olympic_medal_honor/olympics	/m/0kbvv
/m/03cp4cn	/film/film/cinematography	/m/06r_by
/m/0gjw_	/military/military_conflict/combatants./military/military_combatant_group/combatants	/m/03b79
/m/0gq9h	/award/award_category/nominees./award/award_nomination/nominated_for	/m/09cr8
/m/03bwzr4	/education/educational_degree/people_with_this_degree./education/education/institution	/m/0j_sncb
/m/03f2_rc	/award/award_nominee/award_nominations./award/award_nomination/award	/m/01c9jp
/m/01sl1q	/award/award_nominee/award_nominations./award/award_nomination/award_nominee	/m/03_wvl
/m/028k2x	/award/award_winning_work/awards_won./award/award_honor/award_winner	/m/06jrhz
/m/0sw6g	/film/actor/film./film/performance/film	/m/0bxsk
/m/0m_v0	/award/award_winner/awards_won./award/award_honor/award_winner	/m/01l03w2
/m/0127s7	/base/popstra/celebrity/canoodled./base/popstra/canoodled/participant	/m/01vrt_c
/m/02rb607	/film/film/country	/m/03rjj
/m/05ns4g	/soccer/football_team/current_roster./sports/sports_team_roster/position	/m/02_j1w
/m/0bczgm	/tv/tv_producer/programs_produced./tv/tv_producer_term/program	/m/0557yqh
/m/024n3z	/people/person/places_lived./people/place_lived/location	/m/04lc0h
/m/02rb84n	/award/award_winning_work/awards_won./award/award_honor/award_winner	/m/017s11
/m/0517bc	/film/actor/film./film/performance/film	/m/0bwhdbl
/m/083skw	/award/award_winning_work/awards_won./award/award_honor/award	/m/0gq_v
/m/0kpys	/location/location/contains	/m/0q_xk
/m/0hfzr	/award/award_winning_work/awards_won./award/award_honor/award	/m/0gq_v
/m/084w8	/influence/influence_node/influenced_by	/m/07dnx
/m/0hv81	/award/ranked_item/appears_in_ranked_lists./award/ranking/list	/m/05glt
/m/026m3y	/organization/endowed_organization/endowment./measurement_unit/dated_money_value/currency	/m/01nv4h
/m/0hh2s	/music/genre/artists	/m/07sbk
/m/0gjc4d3	/film/film/release_date_s./film/film_regional_release_date/film_release_region	/m/0345h
/m/0979zs	/music/performance_role/track_performances./music/track_contribution/role	/m/03q5t
/m/04rsd2	/people/person/places_lived./people/place_lived/location	/m/04jpl
/m/033gn8	/education/educational_institution/students_graduates./education/education/student	/m/02vxyl5
/m/094vy	/location/location/contains	/m/0144wg
/m/02j9lm	/film/actor/film./film/performance/film	/m/02chhq
/m/01k70_	/award/award_nominee/award_nominations./award/award_nomination/award_nominee	/m/02qssrm
/m/02hsq3m	/award/award_category/nominees./award/award_nomination/nominated_for	/m/0h21v2
/m/0gr0m	/award/award_category/winners./award/award_honor/award_winner	/m/06nz46
/m/017gm7	/film/film/release_date_s./film/film_regional_release_date/film_release_region	/m/06mkj
/m/01vvybv	/people/person/profession	/m/09jwl
/m/05mdx	/medicine/disease/risk_factors	/m/02ctzb
/m/0fvd03	/education/university/local_tuition./measurement_unit/dated_money_value/currency	/m/01nv4h
/m/07s6fsf	/education/educational_degree/people_with_this_degree./education/education/institution	/m/02kzfw
/m/0gq9h	/award/award_category/nominees./award/award_nomination/nominated_for	/m/04lhc4
/m/06jw0s	/people/person/employment_history./business/employment_tenure/company	/m/0152x_
/m/02w86hz	/film/film/release_date_s./film/film_regional_release_date/film_release_region	/m/06mkj
/m/0f5kw7	/soccer/football_team/current_roster./soccer/football_roster_position/position	/m/02_j1w
/m/028hc2	/award/award_nominee/award_nominations./award/award_nomination/award_nominee	/m/01364q
/m/0bxxzb	/award/award_winning_work/awards_won./award/award_honor/honored_for	/m/05pxnmb
/m/014l7h	/business/job_title/people_with_this_title./business/employment_tenure/company	/m/01y68z
/m/034x61	/award/award_nominee/award_nominations./award/award_nomination/award_nominee	/m/095b70
/m/057bc6m	/award/award_nominee/award_nominations./award/award_nomination/award_nominee	/m/076psv
/m/07y_7	/music/performance_role/track_performances./music/track_contribution/role	/m/026t6
/m/0b57p6	/people/person/profession	/m/0cbd2
/m/026kmvf	/soccer/football_player/current_team./sports/sports_team_roster/team	/m/01352_
/m/01gqfm	/olympics/olympic_sport/athletes./olympics/olympic_athlete_affiliation/country	/m/0345h
/m/02gys2	/soccer/football_team/current_roster./soccer/football_roster_position/position	/m/02_j1w
/m/03h0k1	/soccer/football_team/current_roster./soccer/football_roster_position/position	/m/02_j1w
/m/019v9k	/education/educational_degree/people_with_this_degree./education/education/institution	/m/02gnh0
/m/0974y	/business/business_operation/industry	/m/019mlh
/m/047q2wc	/award/award_nominee/award_nominations./award/award_nomination/award_nominee	/m/02qssrm
/m/0h0wc	/film/actor/film./film/performance/film	/m/0bcp9b
/m/04l19_	/film/actor/film./film/performance/film	/m/03x7hd
/m/0bynt	/olympics/olympic_sport/athletes./olympics/olympic_athlete_affiliation/country	/m/07t21
/m/03fmfs	/education/educational_institution/students_graduates./education/education/student	/m/017yfz
/m/07wm6	/education/educational_institution/colors	/m/09q2t
/m/0bt7ws	/award/award_nominee/award_nominations./award/award_nomination/award_nominee	/m/0cnl1c
/m/07xl34	/organization/role/leaders./organization/leadership/organization	/m/01hl_w
/m/03qbnj	/award/award_category/winners./award/award_honor/award_winner	/m/01s21dg
/m/01vj9c	/music/performance_role/track_performances./music/track_contribution/role	/m/07y_7
/m/0sw6g	/people/person/spouse_s./people/marriage/spouse	/m/0c4f4
/m/03f2_rc	/award/award_nominee/award_nominations./award/award_nomination/award_nominee	/m/07c0j
/m/01k70_	/award/award_nominee/award_nominations./award/award_nomination/award_nominee	/m/06jw0s
/m/0gs1_	/base/popstra/celebrity/dated./base/popstra/dated/participant	/m/0h1mt
/m/0gkydb	/award/award_winner/awards_won./award/award_honor/award_winner	/m/0863x_
/m/094vy	/location/location/contains	/m/01ngxm
/m/01fd26	/location/location/time_zones	/m/02hcv8
/m/01c9jp	/award/award_category/winners./award/award_honor/award_winner	/m/07c0j
/m/03rt9	/location/location/contains	/m/01fjw0
/m/07c5l	/location/location/contains	/m/06nnj
/m/0m2wm	/award/award_nominee/award_nominations./award/award_nomination/award_nominee	/m/0159h6
/m/0crfwmx	/film/film/release_date_s./film/film_regional_release_date/film_release_region	/m/05r4w
/m/078lk	/base/popstra/location/vacationers./base/popstra/vacation_choice/vacationer	/m/0bbf1f
/m/0gwgn1k	/film/film/release_date_s./film/film_regional_release_date/film_release_region	/m/06mkj
/m/09nzn6	/soccer/football_team/current_roster./sports/sports_team_roster/position	/m/02_j1w
/m/0fpv_3_	/film/film/release_date_s./film/film_regional_release_date/film_release_region	/m/03rjj
/m/0l12d	/music/artist/track_contributions./music/track_contribution/role	/m/01qzyz
/m/0l12d	/music/artist/contribution./music/recording_contribution/performance_role	/m/03bx0bm
/m/0gqy2	/award/award_category/nominees./award/award_nomination/nominated_for	/m/0ktx_
/m/0p9lw	/film/film/edited_by	/m/0gd9k
/m/0k9ts	/base/schemastaging/organization_extra/phone_number./base/schemastaging/phone_sandbox/service_location	/m/06mkj
/m/04dsnp	/film/film/other_crew./film/film_crew_gig/film_crew_role	/m/01xy5l_
/m/02qssrm	/award/award_winner/awards_won./award/award_honor/award_winner	/m/06jw0s
/m/0gwdy4	/award/award_ceremony/awards_presented./award/award_honor/award_winner	/m/01g6bk
/m/09gkdln	/award/award_ceremony/awards_presented./award/award_honor/award_winner	/m/01yk13
/m/0372kf	/film/actor/film./film/performance/film	/m/0by1wkq
/m/0gr0m	/award/award_category/winners./award/award_honor/ceremony	/m/0fk0xk
/m/0223bl	/soccer/football_team/current_roster./sports/sports_team_roster/position	/m/02_j1w
/m/033tf_	/people/ethnicity/people	/m/0cf2h
/m/015qqg	/award/award_winning_work/awards_won./award/award_honor/award	/m/0gqy2
/m/0g56t9t	/film/film/release_date_s./film/film_regional_release_date/film_release_region	/m/05r4w
/m/03qnvdl	/film/film/release_date_s./film/film_regional_release_date/film_release_region	/m/07t21
/m/0207wx	/award/award_nominee/award_nominations./award/award_nomination/award_nominee	/m/0g1rw
/m/0d68qy	/award/award_winning_work/awards_won./award/award_honor/award_winner	/m/01qr1_
/m/016ywr	/film/actor/film./film/performance/film	/m/09zf_q
/m/0l14j_	/music/performance_role/regular_performances./music/group_membership/role	/m/01vj9c
/m/0gq_v	/award/award_category/nominees./award/award_nomination/nominated_for	/m/067ghz
/m/0dkv90	/film/film/genre	/m/082gq
/m/07c404	/soccer/football_team/current_roster./sports/sports_team_roster/position	/m/02_j1w
/m/0_jws	/location/location/time_zones	/m/02hcv8
/m/099c8n	/award/award_category/nominees./award/award_nomination/nominated_for	/m/02rn00y
/m/06mkj	/location/country/capital	/m/056_y
/m/0dhdp	/sports/sports_team_location/teams	/m/01rlzn
/m/02x1z2s	/award/award_category/nominees./award/award_nomination/nominated_for	/m/0ds5_72
/m/01vj9c	/music/performance_role/regular_performances./music/group_membership/role	/m/0dwt5
/m/0bh8tgs	/film/film/release_date_s./film/film_regional_release_date/film_release_region	/m/03rt9
/m/0gjc4d3	/film/film/release_date_s./film/film_regional_release_date/film_release_region	/m/05r4w
/m/02l840	/award/award_nominee/award_nominations./award/award_nomination/award_nominee	/m/03y82t6
/m/0bcp9b	/film/film/language	/m/04306rv
/m/06151l	/award/award_winner/awards_won./award/award_honor/award_winner	/m/02j9lm
/m/02_cq0	/soccer/football_team/current_roster./soccer/football_roster_position/position	/m/02_j1w
/m/0gqy2	/award/award_category/winners./award/award_honor/ceremony	/m/02yxh9
/m/08y2fn	/tv/tv_program/regular_cast./tv/regular_tv_appearance/actor	/m/0bwgc_
/m/02z1nbg	/award/award_category/winners./award/award_honor/award_winner	/m/01dbk6
/m/06mkj	/location/location/adjoin_s./location/adjoining_relationship/adjoins	/m/05r4w
/m/01wp8w7	/music/group_member/membership./music/group_membership/role	/m/03bx0bm
/m/023n39	/film/actor/film./film/performance/film	/m/0kvgtf
/m/024mpp	/film/film/release_date_s./film/film_regional_release_date/film_release_region	/m/0345h
/m/02_j1w	/sports/sports_position/players./sports/sports_team_roster/team	/m/03__77
/m/019f4v	/award/award_category/nominees./award/award_nomination/nominated_for	/m/09gq0x5
/m/0cb77r	/award/award_nominee/award_nominations./award/award_nomination/award_nominee	/m/076psv
/m/081yw	/location/location/contains	/m/010rvx
/m/02pt6k_	/award/award_winner/awards_won./award/award_honor/award_winner	/m/047q2wc
/m/0gmblvq	/film/film/music	/m/0gv07g
/m/041mt	/influence/influence_node/influenced_by	/m/085gk
/m/02725hs	/film/film/other_crew./film/film_crew_gig/film_crew_role	/m/01xy5l_
/m/0dl9_4	/film/film/estimated_budget./measurement_unit/dated_money_value/currency	/m/01nv4h
/m/037hgm	/people/person/profession	/m/0dz3r
/m/02l3_5	/people/person/places_lived./people/place_lived/location	/m/02j3w
/m/05jzt3	/film/film/music	/m/0m_v0
/m/02vp1f_	/film/film/release_date_s./film/film_regional_release_date/film_release_region	/m/03gj2
/m/0c3xw46	/film/film/release_date_s./film/film_regional_release_date/film_release_region	/m/03rt9
/m/0gq_v	/award/award_category/winners./award/award_honor/ceremony	/m/0fk0xk
/m/07l50vn	/film/film/release_date_s./film/film_regional_release_date/film_release_region	/m/0345h
/m/0bdwqv	/award/award_category/nominees./award/award_nomination/nominated_for	/m/0gmblvq
/m/02jxbw	/award/award_winning_work/awards_won./award/award_honor/award	/m/0gr0m
/m/0k4f3	/award/award_winning_work/awards_won./award/award_honor/award_winner	/m/05x2t7
/m/01364q	/people/person/profession	/m/09jwl
/m/0mkdm	/location/location/adjoin_s./location/adjoining_relationship/adjoins	/m/0mkqr
/m/0f4m2z	/film/film/release_date_s./film/film_regional_release_date/film_release_region	/m/05r4w
/m/02dlh2	/music/performance_role/regular_performances./music/group_membership/group	/m/02_5x9
/m/073bb	/people/person/nationality	/m/0345h
/m/03ym1	/award/award_nominee/award_nominations./award/award_nomination/award	/m/02w9sd7
/m/0mwxl	/location/location/time_zones	/m/02hcv8
/m/0m_v0	/music/artist/origin	/m/06wxw
/m/070w7s	/award/award_winner/awards_won./award/award_honor/award_winner	/m/0265vcb
/m/09b0xs	/award/award_nominee/award_nominations./award/award_nomination/nominated_for	/m/0vhm
/m/019v9k	/education/educational_degree/people_with_this_degree./education/education/institution	/m/011xy1
/m/02cq61	/education/educational_degree/people_with_this_degree./education/education/institution	/m/01y06y
/m/01w1ywm	/award/award_nominee/award_nominations./award/award_nomination/nominated_for	/m/0b005
/m/01ynzf	/people/person/profession	/m/0cbd2
/m/02_j1w	/sports/sports_position/players./sports/sports_team_roster/team	/m/0223bl
/m/0159h6	/award/award_nominee/award_nominations./award/award_nomination/award_nominee	/m/0m2wm
/m/0qf43	/award/award_nominee/award_nominations./award/award_nomination/award	/m/0gq9h
/m/07y_7	/music/performance_role/track_performances./music/track_contribution/role	/m/0jtg0
/m/09gkdln	/award/award_ceremony/awards_presented./award/award_honor/award_winner	/m/05dbf
/m/02ctzb	/people/ethnicity/people	/m/05f0r8
/m/016_mj	/film/actor/film./film/performance/film	/m/01sbv9
/m/07s6fsf	/education/educational_degree/people_with_this_degree./education/education/institution	/m/02mj7c
/m/0cq7kw	/award/award_winning_work/awards_won./award/award_honor/award	/m/0gq9h
/m/02py9yf	/tv/tv_program/genre	/m/02vnz
/m/019f4v	/award/award_category/nominees./award/award_nomination/nominated_for	/m/0cq7kw
/m/031y07	/people/deceased_person/place_of_death	/m/04jpl
/m/03_qj1	/base/x2010fifaworldcupsouthafrica/world_cup_squad/current_world_cup_squad./base/x2010fifaworldcupsouthafrica/current_world_cup_squad/current_club	/m/02qhlm
/m/03bwzr4	/education/educational_degree/people_with_this_degree./education/education/institution	/m/031hxk
/m/0ktx_	/film/film/genre	/m/01hmnh
/m/02cq61	/education/educational_degree/people_with_this_degree./education/education/institution	/m/03ksy
/m/04svwx	/tv/tv_program/genre	/m/01hmnh
/m/0y_9q	/film/film/genre	/m/082gq
/m/01dy7j	/people/person/places_lived./people/place_lived/location	/m/0cc56
/m/027r7k	/film/film/release_date_s./film/film_regional_release_date/film_release_region	/m/03h64
/m/0125xq	/film/film/release_date_s./film/film_regional_release_date/film_release_region	/m/0345h
/m/0c3p7	/base/popstra/celebrity/friendship./base/popstra/friendship/participant	/m/0h0wc
/m/01tp5bj	/people/person/profession	/m/0dz3r
/m/0c_dx	/award/award_category/winners./award/award_honor/award_winner	/m/01q415
/m/096gm	/location/location/contains	/m/02pbzv
/m/0d2by	/people/ethnicity/people	/m/099d4
/m/07gp9	/film/film/other_crew./film/film_crew_gig/film_crew_role	/m/02_n3z
/m/0232lm	/people/person/profession	/m/0dz3r
/m/02w9sd7	/award/award_category/winners./award/award_honor/award_winner	/m/0lkr7
/m/026t6	/music/instrument/instrumentalists	/m/09lwrt
/m/099c8n	/award/award_category/nominees./award/award_nomination/nominated_for	/m/02qr69m
/m/0fq27fp	/film/film/release_date_s./film/film_regional_release_date/film_release_region	/m/03h64
/m/0bynt	/olympics/olympic_sport/athletes./olympics/olympic_athlete_affiliation/country	/m/01n8qg
/m/0dbb3	/people/person/profession	/m/09jwl
/m/0p3sf	/people/person/profession	/m/0cbd2
/m/011k11	/organization/organization/place_founded	/m/04jpl
/m/0gq_v	/award/award_category/nominees./award/award_nomination/nominated_for	/m/0fpv_3_
/m/02_1rq	/award/award_winning_work/awards_won./award/award_honor/award_winner	/m/07s6tbm
/m/0473q	/music/artist/track_contributions./music/track_contribution/role	/m/026t6
/m/03bwzr4	/education/educational_degree/people_with_this_degree./education/education/institution	/m/03np_7
/m/019v9k	/education/educational_degree/people_with_this_degree./education/education/institution	/m/03hpkp
/m/03lh3v	/people/person/place_of_birth	/m/0b_cr
/m/07s95_l	/award/award_winner/awards_won./award/award_honor/award_winner	/m/08pth9
/m/019v9k	/education/educational_degree/people_with_this_degree./education/education/institution	/m/01hl_w
/m/0bwgc_	/award/award_nominee/award_nominations./award/award_nomination/award	/m/0fq9zdn
/m/026m3y	/education/educational_institution/colors	/m/01g5v
/m/02tk74	/film/actor/film./film/performance/film	/m/06y611
/m/0329t7	/soccer/football_team/current_roster./soccer/football_roster_position/position	/m/02_j1w
/m/01vcnl	/soccer/football_team/current_roster./sports/sports_team_roster/position	/m/02_j1w
/m/0ds2n	/film/film/featured_film_locations	/m/02nd_
/m/0b4lkx	/film/film/music	/m/07hgkd
/m/05d49	/location/location/time_zones	/m/0gsrz4
/m/016890	/award/award_winner/awards_won./award/award_honor/award_winner	/m/07hgkd
/m/01vvzb1	/people/person/places_lived./people/place_lived/location	/m/0xl08
/m/0gwgn1k	/film/film/release_date_s./film/film_regional_release_date/film_release_region	/m/03rjj
/m/0gfw56	/soccer/football_team/current_roster./sports/sports_team_roster/position	/m/02_j1w
/m/04sv4	/base/schemastaging/organization_extra/phone_number./base/schemastaging/phone_sandbox/service_language	/m/04306rv
/m/02_j1w	/sports/sports_position/players./sports/sports_team_roster/team	/m/0f5kw7
/m/05jzt3	/film/film/country	/m/0345h
/m/0345h	/olympics/olympic_participating_country/medals_won./olympics/olympic_medal_honor/olympics	/m/0124ld
/m/07y_7	/music/performance_role/track_performances./music/track_contribution/role	/m/02hrlh
/m/026n998	/tv/tv_writer/tv_programs./tv/tv_program_writer_relationship/tv_program	/m/0gj50
/m/07y_7	/music/performance_role/regular_performances./music/group_membership/role	/m/0jtg0
/m/04czx7	/people/ethnicity/languages_spoken	/m/07qv_
/m/0gq9h	/award/award_category/nominees./award/award_nomination/nominated_for	/m/0j_t1
/m/016kft	/award/award_nominee/award_nominations./award/award_nomination/nominated_for	/m/017f3m
/m/01rlzn	/soccer/football_team/current_roster./sports/sports_team_roster/position	/m/02_j1w
/m/01f7d	/award/award_category/disciplines_or_subjects	/m/02xlf
/m/02ltg3	/soccer/football_team/current_roster./sports/sports_team_roster/position	/m/02_j1w
/m/060bp	/government/government_office_category/officeholders./government/government_position_held/jurisdiction_of_office	/m/03gj2
/m/024n3z	/award/award_winner/awards_won./award/award_honor/award_winner	/m/0c6g1l
/m/06gd4	/people/person/profession	/m/0dz3r
/m/09r94m	/film/film/language	/m/04306rv
/m/01s21dg	/people/person/places_lived./people/place_lived/location	/m/0167q3
/m/07s6fsf	/education/educational_degree/people_with_this_degree./education/education/institution	/m/01z3bz
/m/019f4v	/award/award_category/nominees./award/award_nomination/nominated_for	/m/01rnly
/m/01yjl	/sports/professional_sports_team/draft_picks./sports/sports_league_draft_pick/draft	/m/047dpm0
/m/092c5f	/award/award_ceremony/awards_presented./award/award_honor/award_winner	/m/01v9l67
/m/033hn8	/music/record_label/artist	/m/019f9z
/m/02_j1w	/sports/sports_position/players./sports/sports_team_roster/team	/m/0356gk
/m/02g1jh	/award/award_nominee/award_nominations./award/award_nomination/nominated_for	/m/0164qt
/m/0cvw9	/location/location/contains	/m/03gdf1
/m/02fsn	/music/performance_role/regular_performances./music/group_membership/role	/m/0l14j_
/m/0478__m	/music/group_member/membership./music/group_membership/role	/m/03bx0bm
/m/0gq_v	/award/award_category/nominees./award/award_nomination/nominated_for	/m/02qr69m
/m/0fq27fp	/film/film/release_date_s./film/film_regional_release_date/film_release_region	/m/03rt9
/m/015qsq	/film/film/country	/m/03rjj
/m/011k11	/music/record_label/artist	/m/0dbb3
/m/03ksy	/education/educational_institution/students_graduates./education/education/student	/m/040_t
/m/023wyl	/sports/sports_position/players./sports/sports_team_roster/team	/m/0ws7
/m/01mk6	/olympics/olympic_participating_country/medals_won./olympics/olympic_medal_honor/olympics	/m/015l4k
/m/016h4r	/base/popstra/celebrity/dated./base/popstra/dated/participant	/m/03f2_rc
/m/0jgwf	/film/director/film	/m/0glbqt
/m/03cp4cn	/film/film/film_festivals	/m/09rwjly
/m/016ywr	/film/actor/film./film/performance/film	/m/03bx2lk
/m/034x61	/award/award_winner/awards_won./award/award_honor/award_winner	/m/095b70
/m/0gh8zks	/film/film/release_date_s./film/film_regional_release_date/film_release_region	/m/03h64
/m/03rjj	/media_common/netflix_genre/titles	/m/04lqvlr
/m/02rn00y	/film/film/music	/m/04ls53
/m/08pc1x	/award/award_ceremony/awards_presented./award/award_honor/award_winner	/m/01wyq0w
/m/03kcyd	/award/award_nominee/award_nominations./award/award_nomination/award_nominee	/m/01t6xz
/m/01wp8w7	/people/person/profession	/m/0dz3r
/m/011zf2	/award/award_winner/awards_won./award/award_honor/award_winner	/m/02j3d4
/m/01r_t_	/award/award_nominee/award_nominations./award/award_nomination/award	/m/0776drd
/m/0hv81	/award/award_winning_work/awards_won./award/award_honor/award	/m/019f4v
/m/0gq9h	/award/award_category/nominees./award/award_nomination/nominated_for	/m/0h95927
/m/017f3m	/award/award_winning_work/awards_won./award/award_honor/award_winner	/m/02sjf5
/m/043vc	/sports/sports_team/roster./american_football/football_historical_roster_position/position_s	/m/01_9c1
/m/02vy5j	/film/actor/film./film/performance/film	/m/09cr8
/m/05k2s_	/award/award_nominee/award_nominations./award/award_nomination/award	/m/02xj3rw
/m/01gqfm	/olympics/olympic_sport/athletes./olympics/olympic_athlete_affiliation/country	/m/06mkj
/m/03np_7	/education/educational_institution/students_graduates./education/education/major_field_of_study	/m/02_7t
/m/01g888	/music/genre/artists	/m/03xl77
/m/033cnk	/food/food/nutrients./food/nutrition_fact/nutrient	/m/04k8n
/m/0k9wp	/education/educational_institution/colors	/m/01g5v
/m/08wq0g	/award/award_nominee/award_nominations./award/award_nomination/award_nominee	/m/0cnl1c
/m/0k_s5	/location/location/contains	/m/0l38x
/m/08wq0g	/award/award_nominee/award_nominations./award/award_nomination/award_nominee	/m/05xpms
/m/0465_	/people/person/places_lived./people/place_lived/location	/m/03rjj
/m/03f6fl0	/people/person/profession	/m/09jwl
/m/0gr0m	/award/award_category/nominees./award/award_nomination/nominated_for	/m/0ptxj
/m/02661h	/award/award_nominee/award_nominations./award/award_nomination/award	/m/024fz9
/m/02lfns	/award/award_nominee/award_nominations./award/award_nomination/award_nominee	/m/02tr7d
/m/0c921	/award/award_nominee/award_nominations./award/award_nomination/award	/m/019f4v
/m/02v0ff	/award/award_nominee/award_nominations./award/award_nomination/award_nominee	/m/01k70_
/m/0237fw	/base/popstra/celebrity/friendship./base/popstra/friendship/participant	/m/01z0rcq
/m/019v9k	/education/educational_degree/people_with_this_degree./education/education/institution	/m/07tjf
/m/032016	/film/film/featured_film_locations	/m/02nd_
/m/019v9k	/education/educational_degree/people_with_this_degree./education/education/institution	/m/027kp3
/m/01w92	/organization/organization/headquarters./location/mailing_address/state_province_region	/m/04jpl
/m/04991x	/soccer/football_team/current_roster./sports/sports_team_roster/position	/m/02_j1w
/m/0gq9h	/award/award_category/nominees./award/award_nomination/nominated_for	/m/017gm7
/m/0fq27fp	/film/film/estimated_budget./measurement_unit/dated_money_value/currency	/m/01nv4h
/m/0f4vx	/film/film/written_by	/m/05cgy8
/m/02bfxb	/award/award_nominee/award_nominations./award/award_nomination/award	/m/0gq9h
/m/02hsq3m	/award/award_category/nominees./award/award_nomination/nominated_for	/m/0125xq
/m/0c0tzp	/film/film_set_designer/film_sets_designed	/m/0cqnss
/m/02_j1w	/sports/sports_position/players./sports/sports_team_roster/team	/m/0272vm
/m/01_1hw	/film/film/language	/m/04306rv
/m/07dnx	/people/person/profession	/m/0cbd2
/m/0nk72	/people/person/profession	/m/0cbd2
/m/0k3jc	/location/location/time_zones	/m/02hcv8
/m/0fvzz	/location/location/time_zones	/m/02hcv8
/m/04yg13l	/film/film/release_date_s./film/film_regional_release_date/film_release_region	/m/03rt9
/m/070w7s	/award/award_nominee/award_nominations./award/award_nomination/award_nominee	/m/0265vcb
/m/03ksy	/education/educational_institution/students_graduates./education/education/student	/m/0347xl
/m/07h1q	/influence/influence_node/influenced_by	/m/07dnx
/m/01kf3_9	/film/film/music	/m/01cbt3
/m/09gkdln	/award/award_ceremony/awards_presented./award/award_honor/honored_for	/m/083skw
/m/0b_6mr	/time/event/locations	/m/013kcv
/m/067ghz	/film/film/release_date_s./film/film_regional_release_date/film_release_region	/m/03rt9
/m/0py8j	/base/culturalevent/event/entity_involved	/m/01flgk
/m/02qvzf	/sports/sports_position/players./sports/sports_team_roster/team	/m/0jbqf
/m/0hskw	/film/director/film	/m/02py4c8
/m/0n5gb	/location/location/time_zones	/m/02hcv8
/m/01hmnh	/media_common/netflix_genre/titles	/m/01vksx
/m/07xl34	/business/job_title/people_with_this_title./business/employment_tenure/company	/m/01vmv_
/m/02vyw	/award/award_nominee/award_nominations./award/award_nomination/award	/m/0gq9h
/m/05cj4r	/award/award_winner/awards_won./award/award_honor/award_winner	/m/01hkhq
/m/037w7r	/award/award_nominee/award_nominations./award/award_nomination/nominated_for	/m/0glbqt
/m/03qnvdl	/film/film/release_date_s./film/film_regional_release_date/film_release_region	/m/03rjj
/m/02_j1w	/sports/sports_position/players./sports/sports_team_roster/team	/m/09nzn6
/m/0ds1glg	/film/film/release_date_s./film/film_regional_release_date/film_release_region	/m/0345h
/m/0cq7kw	/award/award_winning_work/awards_won./award/award_honor/award	/m/019f4v
/m/03fwln	/people/person/places_lived./people/place_lived/location	/m/01hpnh
/m/02vjp3	/film/film/language	/m/04306rv
/m/01hqk	/film/film/genre	/m/01hmnh
/m/0b1y_2	/film/film/other_crew./film/film_crew_gig/film_crew_role	/m/02_n3z
/m/019v9k	/education/educational_degree/people_with_this_degree./education/education/major_field_of_study	/m/02822
/m/03bx0bm	/music/performance_role/regular_performances./music/group_membership/group	/m/01j59b0
/m/02qssrm	/award/award_winner/awards_won./award/award_honor/award_winner	/m/02v0ff
/m/0gmgwnv	/film/film/genre	/m/02p0szs
/m/03z1c5	/soccer/football_team/current_roster./soccer/football_roster_position/position	/m/02_j1w
/m/0c_dx	/award/award_category/winners./award/award_honor/award_winner	/m/084w8
/m/017gm7	/film/film/release_date_s./film/film_regional_release_date/film_release_region	/m/0j1z8
/m/019f4v	/award/award_category/nominees./award/award_nomination/nominated_for	/m/02jxbw
/m/0bcp9b	/film/film/release_date_s./film/film_regional_release_date/film_release_region	/m/06mkj
/m/0gq_v	/award/award_category/nominees./award/award_nomination/nominated_for	/m/08ct6
/m/03mkk4	/education/educational_degree/people_with_this_degree./education/education/institution	/m/01vg13
/m/0m27n	/location/location/contains	/m/0qpsn
/m/016h9b	/people/person/profession	/m/09jwl
/m/01t6xz	/award/award_nominee/award_nominations./award/award_nomination/award_nominee	/m/01z_g6
/m/0bbm7r	/tv/tv_program/regular_cast./tv/regular_tv_appearance/actor	/m/016ywr
/m/03078l	/soccer/football_team/current_roster./sports/sports_team_roster/position	/m/02_j1w
/m/04jpk2	/film/film/release_date_s./film/film_regional_release_date/film_release_region	/m/03gj2
/m/03qnvdl	/film/film/release_date_s./film/film_regional_release_date/film_release_region	/m/05r4w
/m/065r8g	/education/educational_institution/students_graduates./education/education/student	/m/0gkydb
/m/0146mv	/award/award_nominee/award_nominations./award/award_nomination/nominated_for	/m/05qbbfb
/m/040_t	/influence/influence_node/influenced_by	/m/041_y
/m/03qnvdl	/film/film/release_date_s./film/film_regional_release_date/film_release_region	/m/03h64
/m/0xjl2	/music/genre/artists	/m/014pg1
/m/035yn8	/award/award_winning_work/awards_won./award/award_honor/award	/m/019f4v
/m/098s2w	/film/film/music	/m/01m5m5b
/m/0fpv_3_	/film/film/release_date_s./film/film_regional_release_date/film_release_region	/m/0345_
/m/0c6g1l	/award/award_nominee/award_nominations./award/award_nomination/nominated_for	/m/08phg9
/m/048cl	/people/person/profession	/m/0fj9f
/m/0c7ct	/tv/tv_personality/tv_regular_appearances./tv/tv_regular_personal_appearance/program	/m/03gvm3t
/m/09sh8k	/film/film/other_crew./film/film_crew_gig/film_crew_role	/m/033smt
/m/07f8wg	/award/award_winner/awards_won./award/award_honor/award_winner	/m/017s11
/m/0c11mj	/people/person/nationality	/m/03rjj
/m/04gtdnh	/award/award_winner/awards_won./award/award_honor/award_winner	/m/070w7s
/m/0fb1q	/award/award_nominee/award_nominations./award/award_nomination/award	/m/05zvj3m
/m/016ywr	/film/actor/film./film/performance/film	/m/0bbm7r
/m/0j862	/music/performance_role/regular_performances./music/group_membership/role	/m/0l14j_
/m/099c8n	/award/award_category/nominees./award/award_nomination/nominated_for	/m/011yr9
/m/02qssrm	/award/award_nominee/award_nominations./award/award_nomination/award_nominee	/m/06jvj7
/m/0432cd	/people/person/place_of_birth	/m/0167q3
/m/0k4f3	/film/film/written_by	/m/0c921
/m/0t_hx	/location/hud_county_place/county	/m/0k3kv
/m/01fh0q	/award/award_nominee/award_nominations./award/award_nomination/award	/m/02tj96
/m/0c3jz	/base/popstra/celebrity/canoodled./base/popstra/canoodled/participant	/m/01q7cb_
/m/019kyn	/film/film/genre	/m/01hmnh
/m/033tf_	/people/ethnicity/people	/m/026r8q
/m/011k1h	/music/record_label/artist	/m/01323p
/m/099c8n	/award/award_category/nominees./award/award_nomination/nominated_for	/m/09gq0x5
/m/04v68c	/sports/pro_athlete/teams./sports/sports_team_roster/team	/m/0ckf6
/m/0bczgm	/award/award_winner/awards_won./award/award_honor/award_winner	/m/015pxr
/m/04gtdnh	/award/award_nominee/award_nominations./award/award_nomination/award_nominee	/m/0265vcb
/m/02_j1w	/sports/sports_position/players./sports/sports_team_roster/team	/m/04_cdd
/m/0h95927	/film/film/release_date_s./film/film_regional_release_date/film_release_region	/m/03rt9
/m/06rpd	/sports/sports_team/roster./american_football/football_historical_roster_position/position_s	/m/01r3hr
/m/02d42t	/award/award_nominee/award_nominations./award/award_nomination/award_nominee	/m/05k2s_
/m/07szy	/education/educational_institution/students_graduates./education/education/major_field_of_study	/m/01zc2w
/m/01ck6v	/award/award_category/winners./award/award_honor/award_winner	/m/01s21dg
/m/03_8kz	/award/award_winning_work/awards_won./award/award_honor/award_winner	/m/0d1mp3
/m/0fbw6	/food/food/nutrients./food/nutrition_fact/nutrient	/m/025sf8g
/m/06b19	/education/educational_institution/colors	/m/01g5v
/m/01c9jp	/award/award_category/winners./award/award_honor/award_winner	/m/012x4t
/m/037w7r	/film/actor/film./film/performance/film	/m/0j_t1
/m/0342vg	/people/person/place_of_birth	/m/03h64
/m/0fm3h2	/award/award_category/disciplines_or_subjects	/m/02vxn
/m/02yr1q	/education/educational_institution/students_graduates./education/education/student	/m/05bpg3
/m/039g82	/people/person/profession	/m/01d30f
/m/01hmnh	/media_common/netflix_genre/titles	/m/01qb5d
/m/05ft32	/film/film/release_date_s./film/film_regional_release_date/film_release_region	/m/03h64
/m/02_j1w	/sports/sports_position/players./sports/sports_team_roster/team	/m/07_q87
/m/0272vm	/soccer/football_team/current_roster./sports/sports_team_roster/position	/m/02_j1w
/m/04yg13l	/film/film/genre	/m/02p0szs
/m/062zm5h	/film/film/release_date_s./film/film_regional_release_date/film_release_region	/m/05r4w
/m/05zvj3m	/award/award_category/nominees./award/award_nomination/nominated_for	/m/01vksx
/m/01sl1q	/award/award_winner/awards_won./award/award_honor/award_winner	/m/03_wvl
/m/02_j1w	/sports/sports_position/players./sports/sports_team_roster/team	/m/04gj8r
/m/02vr3gz	/film/film/release_date_s./film/film_regional_release_date/film_release_region	/m/03h64
/m/07gp9	/film/film/release_date_s./film/film_regional_release_date/film_release_region	/m/03h64
/m/04rsd2	/people/person/place_of_birth	/m/04jpl
/m/01pny5	/people/person/profession	/m/09jwl
/m/01zwy	/award/award_winner/awards_won./award/award_honor/award_winner	/m/01f7j9
/m/019f4v	/award/award_category/nominees./award/award_nomination/nominated_for	/m/01hv3t
/m/032t2z	/music/group_member/membership./music/group_membership/role	/m/03bx0bm
/m/012x4t	/music/artist/contribution./music/recording_contribution/performance_role	/m/026t6
/m/0k3p	/base/popstra/location/vacationers./base/popstra/vacation_choice/vacationer	/m/01s21dg
/m/01gst_	/government/legislative_session/members./government/government_position_held/district_represented	/m/050ks
/m/03bwzr4	/education/educational_degree/people_with_this_degree./education/education/institution	/m/011xy1
/m/02tr7d	/award/award_winner/awards_won./award/award_honor/award_winner	/m/01hkhq
/m/02x4w6g	/award/award_category/nominees./award/award_nomination/nominated_for	/m/0fvr1
/m/07xl34	/organization/role/leaders./organization/leadership/organization	/m/06b19
/m/026t6	/music/instrument/instrumentalists	/m/01sb5r
/m/0dtw1x	/film/film/executive_produced_by	/m/01yznp
/m/07s6fsf	/education/educational_degree/people_with_this_degree./education/education/institution	/m/0gy3w
/m/0glbqt	/film/film/cinematography	/m/06nz46
/m/01j53q	/award/award_winner/awards_won./award/award_honor/award_winner	/m/01w92
/m/02b9g4	/tv/tv_personality/tv_regular_appearances./tv/tv_regular_personal_appearance/program	/m/0584r4
/m/03m6t5	/base/americancomedy/celebrity_impressionist/celebrities_impersonated	/m/03bggl
/m/050ks	/location/statistical_region/religions./location/religion_percentage/religion	/m/051kv
/m/0gh6j94	/film/film/country	/m/03rjj
/m/047q2wc	/award/award_nominee/award_nominations./award/award_nomination/award_nominee	/m/05yjhm
/m/0237fw	/award/award_nominee/award_nominations./award/award_nomination/award	/m/02w9sd7
/m/0yc7f	/location/location/time_zones	/m/02hcv8
/m/0170s4	/base/popstra/celebrity/friendship./base/popstra/friendship/participant	/m/02mjf2
/m/01m15br	/award/award_nominee/award_nominations./award/award_nomination/award_nominee	/m/02j3d4
/m/0cnl1c	/award/award_nominee/award_nominations./award/award_nomination/award_nominee	/m/08wq0g
/m/03ym1	/award/award_winner/awards_won./award/award_honor/award_winner	/m/01v9l67
/m/0mwh1	/location/location/adjoin_s./location/adjoining_relationship/adjoins	/m/0mwxz
/m/0dtw1x	/film/film/personal_appearances./film/personal_film_appearance/person	/m/01yznp
/m/01l03w2	/award/award_winner/awards_won./award/award_honor/award_winner	/m/03mszl
/m/0bdwqv	/award/award_category/nominees./award/award_nomination/nominated_for	/m/02py4c8
/m/01wz01	/award/award_winner/awards_won./award/award_honor/award_winner	/m/0h0jz
/m/04wvhz	/award/award_nominee/award_nominations./award/award_nomination/award_nominee	/m/0284gcb
/m/02gl58	/tv/tv_program/genre	/m/01hmnh
/m/0342vg	/award/award_nominee/award_nominations./award/award_nomination/award	/m/09v51c2
/m/01cgz	/olympics/olympic_sport/athletes./olympics/olympic_athlete_affiliation/country	/m/03h2c
/m/01cgz	/olympics/olympic_sport/athletes./olympics/olympic_athlete_affiliation/country	/m/07t21
/m/017s11	/film/film_distributor/films_distributed./film/film_film_distributor_relationship/film	/m/0gt14
/m/024mxd	/award/award_winning_work/awards_won./award/award_honor/honored_for	/m/0d_wms
/m/02bfxb	/people/person/profession	/m/09jwl
/m/04ls53	/award/award_nominee/award_nominations./award/award_nomination/nominated_for	/m/03x7hd
/m/02pt6k_	/award/award_winner/awards_won./award/award_honor/award_winner	/m/05yjhm
/m/0bynt	/olympics/olympic_sport/athletes./olympics/olympic_athlete_affiliation/country	/m/05bmq
/m/02_j1w	/sports/sports_position/players./sports/sports_team_roster/team	/m/01_gv
/m/02x4w6g	/award/award_category/winners./award/award_honor/award_winner	/m/045931
/m/01cgz	/olympics/olympic_sport/athletes./olympics/olympic_athlete_affiliation/country	/m/03__y
/m/01wz01	/people/person/places_lived./people/place_lived/location	/m/0cc56
/m/02x4w6g	/award/award_category/winners./award/award_honor/award_winner	/m/0f5xn
/m/0bbm7r	/award/award_winning_work/awards_won./award/award_honor/award_winner	/m/01hkhq
/m/0124ld	/olympics/olympic_games/sports	/m/06zgc
/m/011k1h	/music/record_label/artist	/m/01vvzb1
/m/01s5q	/film/film_subject/films	/m/01jzyf
/m/0k9ts	/base/schemastaging/organization_extra/phone_number./base/schemastaging/phone_sandbox/service_location	/m/03rjj
/m/01yznp	/people/person/profession	/m/09jwl
/m/02l840	/award/award_winner/awards_won./award/award_honor/award_winner	/m/03y82t6
/m/09gkdln	/award/award_ceremony/awards_presented./award/award_honor/award_winner	/m/0m_v0
/m/01sbv9	/film/film/genre	/m/01hmnh
/m/01f8hf	/award/award_winning_work/awards_won./award/award_honor/award	/m/02hsq3m
/m/06zn2v2	/film/film/release_date_s./film/film_regional_release_date/film_release_region	/m/03gj2
/m/03h4fq7	/film/film/music	/m/0gv07g
/m/02661h	/film/actor/film./film/performance/film	/m/03fts
/m/02q52q	/film/film/genre	/m/01hmnh
/m/020y73	/film/film/country	/m/03rt9
/m/0ttxp	/location/location/time_zones	/m/02hcv8
/m/017d77	/education/educational_institution/students_graduates./education/education/major_field_of_study	/m/02jfc
/m/05dbf	/base/popstra/celebrity/dated./base/popstra/dated/participant	/m/04shbh
/m/01zc2w	/education/field_of_study/students_majoring./education/education/student	/m/04l19_
/m/0c4f4	/award/award_nominee/award_nominations./award/award_nomination/award_nominee	/m/06151l
/m/0n5jm	/location/location/adjoin_s./location/adjoining_relationship/adjoins	/m/0n5by
/m/02p_ycc	/award/award_nominee/award_nominations./award/award_nomination/award_nominee	/m/01dy7j
/m/068cn	/location/administrative_division/first_level_division_of	/m/03rjj
/m/0bxsk	/film/film/music	/m/07j8kh
/m/0gthm	/influence/influence_node/influenced_by	/m/07dnx
/m/0gqy2	/award/award_category/nominees./award/award_nomination/nominated_for	/m/0gy4k
/m/06zgc	/olympics/olympic_sport/athletes./olympics/olympic_athlete_affiliation/country	/m/03rjj
/m/0cjsxp	/award/award_nominee/award_nominations./award/award_nomination/award_nominee	/m/02lfns
/m/01dy7j	/award/award_nominee/award_nominations./award/award_nomination/award_nominee	/m/021_rm
/m/0284h6	/soccer/football_team/current_roster./sports/sports_team_roster/position	/m/02_j1w
/m/05fkf	/location/statistical_region/religions./location/religion_percentage/religion	/m/051kv
/m/05k2s_	/film/actor/film./film/performance/film	/m/032016
/m/03bwzr4	/education/educational_degree/people_with_this_degree./education/education/institution	/m/07vfz
/m/0jsg0m	/music/group_member/membership./music/group_membership/role	/m/01vj9c
/m/0mgrh	/base/aareas/schema/administrative_area/administrative_parent	/m/01c6yz
/m/01ksz9	/music/record_label/artist	/m/01k_yf
/m/02j3d4	/music/artist/track_contributions./music/track_contribution/role	/m/02fsn
/m/01_bkd	/music/genre/artists	/m/0fpj4lx
/m/06nv27	/music/artist/origin	/m/04jpl
/m/03rt9	/location/country/second_level_divisions	/m/08314
/m/0dhdp	/base/biblioness/bibs_location/state	/m/0glh3
/m/04ls53	/award/award_nominee/award_nominations./award/award_nomination/award	/m/04ldyx1
/m/016h4r	/award/award_nominee/award_nominations./award/award_nomination/award_nominee	/m/03h_fk5
/m/0gq_v	/award/award_category/nominees./award/award_nomination/nominated_for	/m/0k4f3
/m/0d6b7	/film/film/release_date_s./film/film_regional_release_date/film_release_region	/m/03rjj
/m/018fmr	/film/actor/film./film/performance/film	/m/014kkm
/m/0cqnss	/film/film/costume_design_by	/m/0c6g29
/m/040p_q	/education/field_of_study/students_majoring./education/education/student	/m/017yfz
/m/09sh8k	/film/film/prequel	/m/057lbk
/m/04shbh	/people/person/places_lived./people/place_lived/location	/m/04jpl
/m/0jtg0	/music/performance_role/regular_performances./music/group_membership/group	/m/0163m1
/m/03_qj1	/soccer/football_team/current_roster./sports/sports_team_roster/position	/m/02_j1w
/m/026t6	/music/performance_role/regular_performances./music/group_membership/role	/m/0dwt5
/m/05dss7	/film/film/release_date_s./film/film_regional_release_date/film_release_region	/m/06mkj
/m/099ck7	/award/award_category/nominees./award/award_nomination/nominated_for	/m/05jzt3
/m/012gbb	/base/popstra/celebrity/dated./base/popstra/dated/participant	/m/0gmtm
/m/0jtg0	/music/performance_role/regular_performances./music/group_membership/role	/m/07y_7
/m/0bt7ws	/award/award_winner/awards_won./award/award_honor/award_winner	/m/0cnl1c
/m/017f4y	/music/artist/track_contributions./music/track_contribution/role	/m/02dlh2
/m/01pcq3	/award/award_nominee/award_nominations./award/award_nomination/nominated_for	/m/01qb5d
/m/0c4f4	/people/person/places_lived./people/place_lived/location	/m/0kpys
/m/05jf85	/film/film/genre	/m/03rzvv
/m/01bdxz	/soccer/football_team/current_roster./sports/sports_team_roster/position	/m/02_j1w
/m/0bxsk	/film/film/genre	/m/04btyz
/m/04045y	/award/hall_of_fame/inductees./award/hall_of_fame_induction/inductee	/m/0grwj
/m/0gq_v	/award/award_category/nominees./award/award_nomination/nominated_for	/m/035yn8
/m/01vksx	/film/film/genre	/m/01hmnh
/m/04svwx	/tv/tv_program/regular_cast./tv/regular_tv_appearance/actor	/m/01qvtwm
/m/0372kf	/film/actor/film./film/performance/film	/m/02x2jl_
/m/03pmzt	/film/actor/film./film/performance/film	/m/016017
/m/019v9k	/education/educational_degree/people_with_this_degree./education/education/institution	/m/026m3y
/m/0h21v2	/film/film/production_companies	/m/0g1rw
/m/03bx2lk	/film/film/release_date_s./film/film_regional_release_date/film_release_region	/m/0j1z8
/m/03y9ccy	/award/award_nominee/award_nominations./award/award_nomination/award_nominee	/m/07lwsz
/m/062zm5h	/film/film/release_date_s./film/film_regional_release_date/film_release_region	/m/03h64
/m/095b70	/award/award_nominee/award_nominations./award/award_nomination/award_nominee	/m/034x61
/m/0cqt41	/sports/professional_sports_team/draft_picks./sports/sports_league_draft_pick/draft	/m/047dpm0
/m/0125xq	/film/film/production_companies	/m/017s11
/m/02w9sd7	/award/award_category/nominees./award/award_nomination/nominated_for	/m/09gq0x5
/m/06929s	/film/film/produced_by	/m/024t0y
/m/0dtw1x	/film/film/personal_appearances./film/personal_film_appearance/person	/m/013tjc
/m/02x1dht	/award/award_category/nominees./award/award_nomination/nominated_for	/m/04jwly
/m/06dkzt	/award/award_nominee/award_nominations./award/award_nomination/nominated_for	/m/09p4w8
/m/017s11	/award/award_nominee/award_nominations./award/award_nomination/nominated_for	/m/0gt14
/m/019f4v	/award/award_category/winners./award/award_honor/award_winner	/m/0c921
/m/0gh8zks	/film/film/release_date_s./film/film_regional_release_date/film_release_region	/m/0345h
/m/01k_0fp	/film/actor/film./film/performance/film	/m/04jpk2
/m/01ck6v	/award/award_category/winners./award/award_honor/award_winner	/m/0pk41
/m/039fgy	/award/award_winning_work/awards_won./award/award_honor/award_winner	/m/06j8q_
/m/05dbf	/film/actor/film./film/performance/film	/m/026hh0m
/m/02cx90	/award/award_winner/awards_won./award/award_honor/award_winner	/m/01m15br
/m/02rn00y	/film/film/other_crew./film/film_crew_gig/film_crew_role	/m/02_n3z
/m/03bx2lk	/film/film/release_date_s./film/film_regional_release_date/film_release_region	/m/03rjj
/m/02f8lw	/people/person/profession	/m/0cbd2
/m/03f2_rc	/music/artist/contribution./music/recording_contribution/performance_role	/m/03bx0bm
/m/05p1tzf	/film/film/film_festivals	/m/0kfhjq0
/m/088xp	/location/location/adjoin_s./location/adjoining_relationship/adjoins	/m/06dfg
/m/02fsn	/music/performance_role/track_performances./music/track_contribution/role	/m/01vj9c
/m/057lbk	/film/film/produced_by	/m/02xnjd
/m/056878	/award/award_ceremony/awards_presented./award/award_honor/award_winner	/m/0kzy0
/m/03bwzr4	/education/educational_degree/people_with_this_degree./education/education/institution	/m/0m7yh
/m/03n5v	/soccer/football_team/current_roster./sports/sports_team_roster/position	/m/02_j1w
/m/011j5x	/music/genre/artists	/m/01wxdn3
/m/0124ld	/olympics/olympic_games/sports	/m/09_94
/m/015g28	/tv/tv_program/regular_cast./tv/regular_tv_appearance/actor	/m/06mnps
/m/03__77	/soccer/football_team/current_roster./soccer/football_roster_position/position	/m/02_j1w
/m/03z9585	/film/film/release_date_s./film/film_regional_release_date/film_release_region	/m/03gj2
/m/011k1h	/music/record_label/artist	/m/0kzy0
/m/01lct6	/people/person/profession	/m/0cbd2
/m/033hn8	/music/record_label/artist	/m/03f6fl0
/m/029jpy	/location/location/time_zones	/m/02hcv8
/m/06gd4	/people/person/profession	/m/09jwl
/m/03rt9	/location/location/contains	/m/0121h7
/m/019f4v	/award/award_category/nominees./award/award_nomination/nominated_for	/m/04lhc4
/m/03q5t	/music/performance_role/track_performances./music/track_contribution/role	/m/01vj9c
/m/02_j1w	/sports/sports_position/players./sports/sports_team_roster/team	/m/05511w
/m/0m2wm	/award/award_nominee/award_nominations./award/award_nomination/award_nominee	/m/04rsd2
/m/0863x_	/award/award_nominee/award_nominations./award/award_nomination/award_nominee	/m/01qr1_
/m/0bynt	/olympics/olympic_sport/athletes./olympics/olympic_athlete_affiliation/country	/m/03rt9
/m/041xyk	/soccer/football_team/current_roster./soccer/football_roster_position/position	/m/02_j1w
/m/050ks	/location/location/contains	/m/0tr3p
/m/026mj	/location/statistical_region/religions./location/religion_percentage/religion	/m/051kv
/m/0jgwf	/people/person/places_lived./people/place_lived/location	/m/04jpl
/m/02z1nbg	/award/award_category/winners./award/award_honor/award_winner	/m/01dvms
/m/01vj9c	/music/performance_role/track_performances./music/track_contribution/role	/m/0dwt5
/m/01hvjx	/film/film/genre	/m/082gq
/m/01364q	/award/award_nominee/award_nominations./award/award_nomination/award_nominee	/m/028hc2
/m/075mb	/location/administrative_division/country	/m/05sb1
/m/0mw5x	/location/location/contains	/m/0_jws
/m/02x1dht	/award/award_category/nominees./award/award_nomination/nominated_for	/m/011yl_
/m/0hx4y	/film/film/release_date_s./film/film_regional_release_date/film_release_region	/m/03gj2
/m/07y_7	/music/performance_role/regular_performances./music/group_membership/group	/m/03k3b
/m/060bp	/government/government_office_category/officeholders./government/government_position_held/jurisdiction_of_office	/m/07dvs
/m/07s6fsf	/education/educational_degree/people_with_this_degree./education/education/institution	/m/01y8zd
/m/0gt14	/award/ranked_item/appears_in_ranked_lists./award/ranking/list	/m/05glt
/m/02x73k6	/award/award_category/nominees./award/award_nomination/nominated_for	/m/011yqc
/m/0hfzr	/award/ranked_item/appears_in_ranked_lists./award/ranking/list	/m/05glt
/m/03x7hd	/film/film/genre	/m/01hmnh
/m/031y07	/award/award_nominee/award_nominations./award/award_nomination/award	/m/0gqy2
/m/06zn2v2	/film/film/release_date_s./film/film_regional_release_date/film_release_region	/m/03rjj
/m/01_lhg	/soccer/football_team/current_roster./soccer/football_roster_position/position	/m/02_j1w
/m/0gjw_	/base/culturalevent/event/entity_involved	/m/03b79
/m/03y82t6	/award/award_nominee/award_nominations./award/award_nomination/award_nominee	/m/0478__m
/m/02vz6dn	/film/film/release_date_s./film/film_regional_release_date/film_release_region	/m/0345h
/m/01cz_1	/base/biblioness/bibs_location/country	/m/0345h
/m/01q8wk7	/people/person/places_lived./people/place_lived/location	/m/0cvw9
/m/02_j1w	/sports/sports_position/players./sports/sports_team_roster/team	/m/05ns4g
/m/04jwly	/film/film/produced_by	/m/0d500h
/m/016_mj	/award/award_nominee/award_nominations./award/award_nomination/award	/m/05zvj3m
/m/0bt7ws	/award/award_nominee/award_nominations./award/award_nomination/award_nominee	/m/08wq0g
/m/0fp_xp	/sports/pro_athlete/teams./sports/sports_team_roster/team	/m/0223bl
/m/03xl77	/music/artist/track_contributions./music/track_contribution/role	/m/026t6
/m/01gst_	/government/legislative_session/members./government/government_position_held/district_represented	/m/05kkh
/m/017s11	/award/award_nominee/award_nominations./award/award_nomination/award_nominee	/m/02_l96
/m/03ym1	/film/actor/film./film/performance/film	/m/065dc4
/m/0l14j_	/music/performance_role/track_performances./music/track_contribution/role	/m/02dlh2
/m/063k3h	/people/ethnicity/people	/m/083p7
/m/0c3xw46	/film/film/release_date_s./film/film_regional_release_date/film_release_region	/m/03h64
/m/03_qj1	/base/x2010fifaworldcupsouthafrica/world_cup_squad/current_world_cup_squad./base/x2010fifaworldcupsouthafrica/current_world_cup_squad/current_club	/m/02k9k9
/m/07xl34	/organization/role/leaders./organization/leadership/organization	/m/0fvd03
/m/03bwzr4	/education/educational_degree/people_with_this_degree./education/education/institution	/m/08815
/m/05gjfk	/soccer/football_team/current_roster./sports/sports_team_roster/position	/m/02_j1w
/m/019v9k	/education/educational_degree/people_with_this_degree./education/education/institution	/m/03y5ky
/m/016khd	/award/award_winner/awards_won./award/award_honor/award_winner	/m/01wz01
/m/0170s4	/base/popstra/celebrity/dated./base/popstra/dated/participant	/m/02f8lw
/m/0gq9h	/award/award_category/nominees./award/award_nomination/nominated_for	/m/035yn8
/m/07s6fsf	/education/educational_degree/people_with_this_degree./education/education/institution	/m/027kp3
/m/0ptxj	/award/award_winning_work/awards_won./award/award_honor/award_winner	/m/03s2y9
/m/029sk	/medicine/disease/notable_people_with_this_condition	/m/0fb1q
/m/03mqj_	/soccer/football_team/current_roster./soccer/football_roster_position/position	/m/02_j1w
/m/0125xq	/film/film/release_date_s./film/film_regional_release_date/film_release_region	/m/03rjj
/m/01_gv	/soccer/football_team/current_roster./soccer/football_roster_position/position	/m/02_j1w
/m/0cmc26r	/film/film/release_date_s./film/film_regional_release_date/film_release_region	/m/05r4w
/m/08815	/education/educational_institution/students_graduates./education/education/major_field_of_study	/m/0fdys
/m/03bx0bm	/music/performance_role/guest_performances./music/recording_contribution/performance_role	/m/0l14j_
/m/012ky3	/award/award_winner/awards_won./award/award_honor/award_winner	/m/053yx
/m/085ccd	/film/film/release_date_s./film/film_regional_release_date/film_release_region	/m/03h64
/m/0284h6	/soccer/football_team/current_roster./soccer/football_roster_position/position	/m/02_j1w
/m/02m4d	/location/location/adjoin_s./location/adjoining_relationship/adjoins	/m/0cc56
/m/0xynl	/location/location/time_zones	/m/02hcv8
/m/02hfp_	/award/award_nominee/award_nominations./award/award_nomination/award	/m/019f4v
/m/0j0k	/location/location/contains	/m/07dvs
/m/0gtvrv3	/film/film/country	/m/03rjj
/m/03mh94	/film/film/produced_by	/m/0bjkpt
/m/0345h	/location/location/contains	/m/01z3bz
/m/0gqy2	/award/award_category/winners./award/award_honor/ceremony	/m/05hmp6
/m/07c0j	/award/award_nominee/award_nominations./award/award_nomination/award_nominee	/m/03f2_rc
/m/017s11	/film/film_distributor/films_distributed./film/film_film_distributor_relationship/film	/m/02vrgnr
/m/09cdxn	/award/award_nominee/award_nominations./award/award_nomination/nominated_for	/m/0k4f3
/m/01c6yz	/location/location/contains	/m/0gxmj
/m/01k70_	/award/award_winner/awards_won./award/award_honor/award_winner	/m/02pt6k_
/m/09sh8k	/film/film/language	/m/03_9r
/m/04kn29	/soccer/football_team/current_roster./sports/sports_team_roster/position	/m/02_j1w
/m/06jrhz	/tv/tv_writer/tv_programs./tv/tv_program_writer_relationship/tv_program	/m/028k2x
/m/07z6xs	/film/film/other_crew./film/film_crew_gig/film_crew_role	/m/01xy5l_
/m/04jpl	/location/location/contains	/m/019vsw
/m/01k_0fp	/people/person/profession	/m/09jwl
/m/02tr7d	/award/award_nominee/award_nominations./award/award_nomination/award_nominee	/m/01hkhq
/m/07r_dg	/people/person/profession	/m/09jwl
/m/02w9sd7	/award/award_category/nominees./award/award_nomination/nominated_for	/m/0gmgwnv
/m/0gqy2	/award/award_category/nominees./award/award_nomination/nominated_for	/m/01hv3t
/m/03bwzr4	/education/educational_degree/people_with_this_degree./education/education/institution	/m/07vyf
/m/02zdwq	/business/job_title/people_with_this_title./business/employment_tenure/company	/m/01s73z
/m/033hn8	/music/record_label/artist	/m/0fpj4lx
/m/02qssrm	/award/award_nominee/award_nominations./award/award_nomination/award_nominee	/m/02pt6k_
/m/08phg9	/award/award_winning_work/awards_won./award/award_honor/award_winner	/m/04ls53
/m/0dll_t2	/film/film/produced_by	/m/0n6f8
/m/051gjr	/soccer/football_team/current_roster./soccer/football_roster_position/position	/m/02_j1w
/m/047q2wc	/award/award_winner/awards_won./award/award_honor/award_winner	/m/02v0ff
/m/0l14j_	/music/performance_role/regular_performances./music/group_membership/group	/m/0163m1
/m/02gr81	/education/educational_institution/students_graduates./education/education/major_field_of_study	/m/0g4gr
/m/03yk8z	/people/person/places_lived./people/place_lived/location	/m/05fkf
/m/0gtvrv3	/film/film/release_date_s./film/film_regional_release_date/film_release_region	/m/06mkj
/m/011k1h	/music/record_label/artist	/m/032t2z
/m/01t04r	/music/record_label/artist	/m/017lb_
/m/0n1s0	/film/film/genre	/m/05mrx8
/m/047q2wc	/award/award_nominee/award_nominations./award/award_nomination/award_nominee	/m/01k70_
/m/01qr1_	/award/award_winner/awards_won./award/award_honor/award_winner	/m/0gkydb
/m/099c8n	/award/award_category/nominees./award/award_nomination/nominated_for	/m/017gm7
/m/0716t2	/award/award_nominee/award_nominations./award/award_nomination/award_nominee	/m/0170s4
/m/02661h	/award/award_nominee/award_nominations./award/award_nomination/award	/m/02x73k6
/m/015np0	/award/award_nominee/award_nominations./award/award_nomination/award	/m/02x73k6
/m/0ft18	/award/award_winning_work/awards_won./award/award_honor/award	/m/0gq9h
/m/078lk	/base/aareas/schema/administrative_area/administrative_parent	/m/03rjj
/m/01qr1_	/film/actor/film./film/performance/film	/m/0yx7h
/m/07xl34	/organization/role/leaders./organization/leadership/organization	/m/026m3y
/m/01ry0f	/film/actor/film./film/performance/film	/m/09p4w8
/m/02g3gw	/award/award_category/nominees./award/award_nomination/nominated_for	/m/02qr69m
/m/0gd9k	/award/award_nominee/award_nominations./award/award_nomination/award	/m/02xj3rw
/m/06jvj7	/award/award_winner/awards_won./award/award_honor/award_winner	/m/02v0ff
/m/02x4w6g	/award/award_category/winners./award/award_honor/award_winner	/m/0flw6
/m/099c8n	/award/award_category/nominees./award/award_nomination/nominated_for	/m/011ykb
/m/02822	/education/field_of_study/students_majoring./education/education/major_field_of_study	/m/05qdh
/m/02tr7d	/award/award_winner/awards_won./award/award_honor/award_winner	/m/0170s4
/m/02qssrm	/award/award_winner/awards_won./award/award_honor/award_winner	/m/01k70_
/m/05xvj	/sports/sports_team/colors	/m/01g5v
/m/092c5f	/award/award_ceremony/awards_presented./award/award_honor/award_winner	/m/01846t
/m/043vc	/sports/sports_team/roster./american_football/football_historical_roster_position/position_s	/m/023wyl
/m/0cjyzs	/award/award_category/winners./award/award_honor/award_winner	/m/0bczgm
/m/0bl5c	/film/film/genre	/m/082gq
/m/01z0rcq	/base/popstra/celebrity/friendship./base/popstra/friendship/participant	/m/0237fw
/m/0hx4y	/film/film/release_date_s./film/film_regional_release_date/film_release_region	/m/0345h
/m/01k5t_3	/award/award_nominee/award_nominations./award/award_nomination/award_nominee	/m/01l03w2
/m/03ksy	/education/educational_institution/students_graduates./education/education/major_field_of_study	/m/02cm61
/m/0h0jz	/award/award_nominee/award_nominations./award/award_nomination/nominated_for	/m/02bg8v
/m/01tt43d	/people/person/nationality	/m/03rjj
/m/067ghz	/film/film/release_date_s./film/film_regional_release_date/film_release_region	/m/03h64
/m/05d1y	/people/deceased_person/place_of_death	/m/0cc56
/m/03ksy	/education/university/fraternities_and_sororities	/m/035tlh
/m/0hv81	/film/film/release_date_s./film/film_regional_release_date/film_regional_debut_venue	/m/056_y
/m/04jpl	/base/popstra/location/vacationers./base/popstra/vacation_choice/vacationer	/m/0bbf1f
/m/02jp5r	/award/award_ceremony/awards_presented./award/award_honor/honored_for	/m/011yqc
/m/09gkdln	/award/award_ceremony/awards_presented./award/award_honor/award_winner	/m/0h0wc
/m/02b1hb	/sports/sports_team/colors	/m/01g5v
/m/060bp	/government/government_office_category/officeholders./government/government_position_held/jurisdiction_of_office	/m/01mk6
/m/013sg6	/people/person/place_of_birth	/m/06wxw
/m/07y_7	/music/performance_role/track_performances./music/track_contribution/role	/m/02fsn
/m/015g28	/film/film/genre	/m/082gq
/m/01y06y	/education/educational_institution/students_graduates./education/education/major_field_of_study	/m/05qjt
/m/08b0cj	/soccer/football_player/current_team./sports/sports_team_roster/team	/m/03h0k1
/m/01t_z	/people/person/profession	/m/0h9c
/m/0639bg	/film/film/other_crew./film/film_crew_gig/crewmember	/m/02xc1w4
/m/07l50vn	/film/film/release_date_s./film/film_regional_release_date/film_release_region	/m/03h64
/m/02x1dht	/award/award_category/nominees./award/award_nomination/nominated_for	/m/0dl9_4
/m/0gq_v	/award/award_category/nominees./award/award_nomination/nominated_for	/m/0b4lkx
/m/06zn2v2	/film/film/release_date_s./film/film_regional_release_date/film_release_region	/m/06mkj
/m/01m8dg	/location/location/time_zones	/m/02hcv8
/m/02hsq3m	/award/award_category/nominees./award/award_nomination/nominated_for	/m/0fpv_3_
/m/03bx0bm	/music/performance_role/regular_performances./music/group_membership/group	/m/016890
/m/0j2pg	/soccer/football_team/current_roster./sports/sports_team_roster/position	/m/02_j1w
/m/053yx	/influence/influence_node/peers./influence/peer_relationship/peers	/m/024zq
/m/0gt14	/film/film/production_companies	/m/017s11
/m/03z9585	/film/film/release_date_s./film/film_regional_release_date/film_release_region	/m/03h64
/m/07kc_	/music/performance_role/regular_performances./music/group_membership/group	/m/0l8g0
/m/01q2nx	/film/film/production_companies	/m/030_1_
/m/01cr28	/sports/sports_team_location/teams	/m/03mqj_
/m/0k9ts	/base/schemastaging/organization_extra/phone_number./base/schemastaging/phone_sandbox/service_location	/m/03rt9
/m/03ym1	/award/award_nominee/award_nominations./award/award_nomination/award_nominee	/m/01v9l67
/m/09k56b7	/film/film/release_date_s./film/film_regional_release_date/film_release_region	/m/0345h
/m/05hmp6	/award/award_ceremony/awards_presented./award/award_honor/award_winner	/m/0g1rw
/m/0zgfm	/location/location/time_zones	/m/02lcqs
/m/033hn8	/music/record_label/artist	/m/01sb5r
/m/07hgkd	/award/award_nominee/award_nominations./award/award_nomination/award_nominee	/m/0134wr
/m/032t2z	/people/person/profession	/m/09jwl
/m/02bg8v	/tv/tv_program/genre	/m/02p0szs
/m/0b1y_2	/award/award_winning_work/awards_won./award/award_honor/award_winner	/m/021yc7p
/m/033cnk	/food/food/nutrients./food/nutrition_fact/nutrient	/m/0h1tz
/m/0fq27fp	/film/film/release_date_s./film/film_regional_release_date/film_release_region	/m/03rjj
/m/04411	/people/person/employment_history./business/employment_tenure/company	/m/03p7gb
/m/03t5kl	/award/award_category/winners./award/award_honor/ceremony	/m/056878
/m/0gj8nq2	/film/film/release_date_s./film/film_regional_release_date/film_release_region	/m/06mkj
/m/0hfzr	/film/film/genre	/m/082gq
/m/07lwsz	/award/award_nominee/award_nominations./award/award_nomination/award_nominee	/m/025y9fn
/m/081yw	/location/location/contains	/m/0ml_m
/m/01t6xz	/film/actor/film./film/performance/film	/m/0fvr1
/m/03ksy	/education/educational_institution/students_graduates./education/education/student	/m/06jnvs
/m/06rgq	/base/popstra/celebrity/canoodled./base/popstra/canoodled/participant	/m/02b9g4
/m/02psgq	/film/film/genre	/m/06nbt
/m/083skw	/award/ranked_item/appears_in_ranked_lists./award/ranking/list	/m/05glt
/m/01l79yc	/award/award_nominee/award_nominations./award/award_nomination/nominated_for	/m/07tj4c
/m/05cgy8	/award/award_nominee/award_nominations./award/award_nomination/nominated_for	/m/0f4vx
/m/0gh6j94	/film/film/release_date_s./film/film_regional_release_date/film_release_region	/m/03rjj
/m/0dwt5	/music/performance_role/regular_performances./music/group_membership/role	/m/01vj9c
/m/062zm5h	/film/film/release_date_s./film/film_regional_release_date/film_release_region	/m/03rjj
/m/0gq9h	/award/award_category/nominees./award/award_nomination/nominated_for	/m/0yx7h
/m/02y0dd	/people/person/nationality	/m/03rt9
/m/0kv9d3	/film/film/produced_by	/m/026gb3v
/m/01_bkd	/music/genre/artists	/m/01q7cb_
/m/02pxst	/film/film/genre	/m/082gq
/m/0jtg0	/music/performance_role/track_performances./music/track_contribution/role	/m/07y_7
/m/03rt9	/organization/organization_member/member_of./organization/organization_membership/organization	/m/04k4l
/m/0j_t1	/award/ranked_item/appears_in_ranked_lists./award/ranking/list	/m/05glt
/m/0473q	/music/group_member/membership./music/group_membership/role	/m/03bx0bm
/m/03f2_rc	/award/award_nominee/award_nominations./award/award_nomination/award	/m/0gq9h
/m/02sjf5	/award/award_nominee/award_nominations./award/award_nomination/nominated_for	/m/017f3m
/m/02d4ct	/film/actor/film./film/performance/film	/m/03cp4cn
/m/06bng	/people/person/profession	/m/0fj9f
/m/027fwmt	/film/film/genre	/m/01hmnh
/m/08jcfy	/organization/role/leaders./organization/leadership/organization	/m/03gdf1
/m/080dwhx	/award/award_winning_work/awards_won./award/award_honor/award_winner	/m/02lfns
/m/06jvj7	/award/award_winner/awards_won./award/award_honor/award_winner	/m/047q2wc
/m/01g888	/music/genre/artists	/m/014pg1
/m/01wdqrx	/music/artist/contribution./music/recording_contribution/performance_role	/m/026t6
/m/0fk0xk	/award/award_ceremony/awards_presented./award/award_honor/award_winner	/m/016dp0
/m/02pjc1h	/film/film/language	/m/04306rv
/m/0lx2l	/base/popstra/celebrity/dated./base/popstra/dated/participant	/m/05dbf
/m/01w1ywm	/people/person/profession	/m/014kbl
/m/04jwly	/award/award_winning_work/awards_won./award/award_honor/award_winner	/m/0d500h
/m/033tf_	/people/ethnicity/people	/m/0cm89v
/m/028kj0	/film/film/other_crew./film/film_crew_gig/film_crew_role	/m/02_n3z
/m/06jkm	/people/person/profession	/m/0cbd2
/m/017s11	/film/film_distributor/films_distributed./film/film_film_distributor_relationship/film	/m/0dd6bf
/m/02sjf5	/award/award_nominee/award_nominations./award/award_nomination/award_nominee	/m/046m59
/m/01hmnh	/media_common/netflix_genre/titles	/m/0639bg
/m/02x4w6g	/award/award_category/nominees./award/award_nomination/nominated_for	/m/0kv9d3
/m/0bbf1f	/base/popstra/celebrity/friendship./base/popstra/friendship/participant	/m/0237fw
/m/02fj8n	/film/film/music	/m/0b6yp2
/m/0pz6q	/education/educational_institution/colors	/m/01g5v
/m/047q2wc	/award/award_nominee/award_nominations./award/award_nomination/award	/m/0gq9h
/m/03s2y9	/award/award_nominee/award_nominations./award/award_nomination/nominated_for	/m/0ptxj
/m/0fpj4lx	/people/person/profession	/m/09jwl
/m/0979zs	/music/performance_role/track_performances./music/track_contribution/role	/m/026t6
/m/079kdz	/people/person/places_lived./people/place_lived/location	/m/081yw
/m/03m6t5	/base/americancomedy/celebrity_impressionist/celebrities_impersonated	/m/0h326
/m/0356gk	/soccer/football_team/current_roster./soccer/football_roster_position/position	/m/02_j1w
/m/05p1tzf	/film/film/release_date_s./film/film_regional_release_date/film_release_region	/m/05r4w
/m/02qsjt	/award/award_nominee/award_nominations./award/award_nomination/award_nominee	/m/0pk41
/m/04969y	/film/film/release_date_s./film/film_regional_release_date/film_release_region	/m/06mkj
/m/0gtvrv3	/film/film/release_date_s./film/film_regional_release_date/film_release_region	/m/07t21
/m/016890	/award/award_nominee/award_nominations./award/award_nomination/award_nominee	/m/0134wr
/m/02_j1w	/sports/sports_position/players./sports/sports_team_roster/team	/m/04kn29
/m/060v34	/film/film/produced_by	/m/01f7j9
/m/0c6g1l	/award/award_winner/awards_won./award/award_honor/award_winner	/m/024n3z
/m/01k70_	/award/award_nominee/award_nominations./award/award_nomination/award_nominee	/m/047q2wc
/m/0b_72t	/base/marchmadness/ncaa_basketball_tournament/seeds./base/marchmadness/ncaa_tournament_seed/team	/m/02py8_w
/m/0bl06	/film/film/costume_design_by	/m/0c6g29
/m/01wdqrx	/music/artist/track_contributions./music/track_contribution/role	/m/026t6
/m/03n69x	/sports/pro_athlete/teams./sports/sports_team_roster/team	/m/06rny
/m/04knvh	/soccer/football_team/current_roster./sports/sports_team_roster/position	/m/02_j1w
/m/099c8n	/award/award_category/nominees./award/award_nomination/nominated_for	/m/0gmgwnv
/m/0m2cb	/location/location/adjoin_s./location/adjoining_relationship/adjoins	/m/0m27n
/m/03hfmm	/film/film/music	/m/01jrvr6
/m/07gp9	/film/film/release_date_s./film/film_regional_release_date/film_release_region	/m/06mkj
/m/05qdh	/education/field_of_study/students_majoring./education/education/major_field_of_study	/m/02vxn
/m/0gjv_	/organization/organization/headquarters./location/mailing_address/citytown	/m/04jpl
/m/0gr0m	/award/award_category/nominees./award/award_nomination/nominated_for	/m/0fpv_3_
/m/0487c3	/people/person/places_lived./people/place_lived/location	/m/04jpl
/m/04jpl	/location/location/contains	/m/0m4yg
/m/0y3k9	/location/location/time_zones	/m/02hcv8
/m/016890	/music/artist/origin	/m/0xn7q
/m/0f4m2z	/film/film/country	/m/0345h
/m/0f0p0	/film/actor/film./film/performance/film	/m/0k7tq
/m/01v42g	/film/actor/film./film/performance/film	/m/034hwx
/m/060bp	/government/government_office_category/officeholders./government/government_position_held/jurisdiction_of_office	/m/05bmq
/m/09d5h	/tv/tv_network/programs./tv/tv_network_duration/program	/m/0b005
/m/01_f_5	/film/actor/film./film/performance/film	/m/01rnly
/m/01bns_	/music/performance_role/track_performances./music/track_contribution/role	/m/02fsn
/m/02rb84n	/film/film/other_crew./film/film_crew_gig/film_crew_role	/m/033smt
/m/0bynt	/olympics/olympic_sport/athletes./olympics/olympic_athlete_affiliation/country	/m/05sb1
/m/0htww	/film/film/production_companies	/m/017s11
/m/026t6	/music/instrument/instrumentalists	/m/012x4t
/m/0j862	/music/performance_role/regular_performances./music/group_membership/role	/m/03bx0bm
/m/098s2w	/film/film/country	/m/0345h
/m/0k3hn	/location/location/time_zones	/m/02hcv8
/m/01_lhg	/soccer/football_team/current_roster./sports/sports_team_roster/position	/m/02_j1w
/m/0d6b7	/film/film/release_date_s./film/film_regional_release_date/film_release_region	/m/0345h
/m/06zgc	/olympics/olympic_sport/athletes./olympics/olympic_athlete_affiliation/olympics	/m/0124ld
/m/0dwt5	/music/performance_role/regular_performances./music/group_membership/role	/m/026t6
/m/0bbm7r	/award/award_winning_work/awards_won./award/award_honor/award_winner	/m/016ywr
/m/0gh6j94	/film/film/language	/m/04306rv
/m/02z9hqn	/film/film/dubbing_performances./film/dubbing_performance/actor	/m/084x96
/m/03m6t5	/base/americancomedy/celebrity_impressionist/celebrities_impersonated	/m/015d3h
/m/07vyf	/education/educational_institution/colors	/m/02rnmb
/m/065r8g	/education/educational_institution/students_graduates./education/education/major_field_of_study	/m/041y2
/m/0bzlrh	/award/award_ceremony/awards_presented./award/award_honor/award_winner	/m/0h1mt
/m/06rkfs	/education/university/fraternities_and_sororities	/m/035tlh
/m/0glt670	/music/genre/artists	/m/01wyz92
/m/017vkx	/music/artist/track_contributions./music/track_contribution/role	/m/01vj9c
/m/09m465	/soccer/football_player/current_team./sports/sports_team_roster/team	/m/01rlzn
/m/01lxd4	/music/genre/artists	/m/053yx
/m/024n3z	/award/award_winner/awards_won./award/award_honor/award_winner	/m/01v9l67
/m/04gtdnh	/award/award_nominee/award_nominations./award/award_nomination/award_nominee	/m/0275_pj
/m/03jht	/people/person/nationality	/m/0345h
/m/0127s7	/award/award_nominee/award_nominations./award/award_nomination/award	/m/03qbnj
/m/03ksy	/education/educational_institution/students_graduates./education/education/student	/m/06jrhz
/m/01w40h	/music/record_label/artist	/m/01vvybv
/m/05xpms	/award/award_nominee/award_nominations./award/award_nomination/award_nominee	/m/0cnl1c
/m/0372kf	/award/award_winner/awards_won./award/award_honor/award_winner	/m/01pcq3
/m/01f7j9	/people/person/spouse_s./people/marriage/location_of_ceremony	/m/03rjj
/m/0ct9_	/people/person/profession	/m/0cbd2
/m/01314k	/education/educational_institution/colors	/m/01g5v
/m/011ykb	/award/award_winning_work/awards_won./award/award_honor/award	/m/0gqy2
/m/07wlt	/organization/organization/headquarters./location/mailing_address/citytown	/m/07ypt
/m/016pns	/people/person/places_lived./people/place_lived/location	/m/06wxw
/m/0g4gr	/education/field_of_study/students_majoring./education/education/major_field_of_study	/m/02_7t
/m/02s9vc	/soccer/football_team/current_roster./soccer/football_roster_position/position	/m/02_j1w
/m/0m0hw	/people/person/place_of_birth	/m/0167q3
/m/0d2by	/people/ethnicity/languages_spoken	/m/0459q4
/m/047q2wc	/award/award_nominee/award_nominations./award/award_nomination/award_nominee	/m/06jw0s
/m/0c0tzp	/award/award_nominee/award_nominations./award/award_nomination/award_nominee	/m/076psv
/m/019v9k	/education/educational_degree/people_with_this_degree./education/education/major_field_of_study	/m/09s1f
/m/01hkhq	/film/actor/film./film/performance/film	/m/02x2jl_
/m/01zc2w	/education/field_of_study/students_majoring./education/education/major_field_of_study	/m/02822
/m/02xj3rw	/award/award_category/disciplines_or_subjects	/m/02vxn
/m/0265vcb	/award/award_nominee/award_nominations./award/award_nomination/award_nominee	/m/070w7s
/m/05fkf	/location/location/contains	/m/02ldmw
/m/0cfywh	/people/person/place_of_birth	/m/05sb1
/m/0l14j_	/music/performance_role/track_performances./music/track_contribution/role	/m/01vj9c
/m/0d68qy	/tv/tv_program/regular_cast./tv/regular_tv_appearance/actor	/m/01qr1_
/m/0gj50	/award/award_winning_work/awards_won./award/award_honor/award_winner	/m/070w7s
/m/0g1rw	/award/award_nominee/award_nominations./award/award_nomination/award	/m/0gq9h
/m/02vz6dn	/film/film/release_date_s./film/film_regional_release_date/film_release_region	/m/06mkj
/m/027kp3	/education/educational_institution/students_graduates./education/education/major_field_of_study	/m/02_7t
/m/0cnl1c	/award/award_winner/awards_won./award/award_honor/award_winner	/m/05xpms
/m/02_j1w	/sports/sports_position/players./sports/sports_team_roster/team	/m/02056s
/m/07g7h2	/people/person/profession	/m/0cbd2
/m/01ry0f	/film/actor/film./film/performance/film	/m/098s2w
/m/019v9k	/education/educational_degree/people_with_this_degree./education/education/institution	/m/0177sq
/m/02py4c8	/award/award_winning_work/awards_won./award/award_honor/award_winner	/m/0hskw
/m/0fkzq	/government/government_office_category/officeholders./government/government_position_held/jurisdiction_of_office	/m/081yw
/m/03pmzt	/film/actor/film./film/performance/film	/m/0gh65c5
/m/0gq9h	/award/award_category/winners./award/award_honor/award_winner	/m/017s11
/m/043vc	/sports/professional_sports_team/draft_picks./sports/sports_league_draft_pick/school	/m/0j_sncb
/m/09gq0x5	/award/award_winning_work/awards_won./award/award_honor/award_winner	/m/03yk8z
/m/02f8lw	/base/popstra/celebrity/dated./base/popstra/dated/participant	/m/0170s4
/m/0gqy2	/award/award_category/nominees./award/award_nomination/nominated_for	/m/0b1y_2
/m/0crfwmx	/film/film/release_date_s./film/film_regional_release_date/film_release_region	/m/0345h
/m/04306rv	/language/human_language/countries_spoken_in	/m/07ytt
/m/0dwt5	/music/performance_role/regular_performances./music/group_membership/role	/m/011k_j
/m/01vksx	/film/film/release_date_s./film/film_regional_release_date/film_release_region	/m/07t21
/m/014hdb	/people/person/places_lived./people/place_lived/location	/m/014clr
/m/0c3p7	/people/person/places_lived./people/place_lived/location	/m/0cc56
/m/0h1fktn	/film/film/executive_produced_by	/m/07g7h2
/m/08815	/education/educational_institution/students_graduates./education/education/student	/m/03fnyk
/m/08ct6	/award/ranked_item/appears_in_ranked_lists./award/ranking/list	/m/05glt
/m/0bbf1f	/film/actor/film./film/performance/film	/m/06zn2v2
/m/01hvjx	/film/film/genre	/m/05mrx8
/m/0372kf	/award/award_nominee/award_nominations./award/award_nomination/award_nominee	/m/0h0wc
/m/05pxnmb	/film/film/country	/m/0345h
/m/0glt670	/music/genre/artists	/m/03xl77
/m/01qr1_	/award/award_nominee/award_nominations./award/award_nomination/nominated_for	/m/0d68qy
/m/0gbfn9	/film/film/release_date_s./film/film_regional_release_date/film_release_region	/m/03rt9
/m/01q415	/award/award_nominee/award_nominations./award/award_nomination/award	/m/0c_dx
/m/0fpv_3_	/film/film/music	/m/01m5m5b
/m/01sbv9	/award/award_winning_work/awards_won./award/award_honor/award_winner	/m/016_mj
/m/01nd2c	/soccer/football_team/current_roster./sports/sports_team_roster/position	/m/02_j1w
/m/01vvybv	/people/person/profession	/m/0dz3r
/m/0hqgp	/people/person/nationality	/m/03gj2
/m/01vj9c	/music/performance_role/regular_performances./music/group_membership/group	/m/0khth
/m/07ypt	/location/location/time_zones	/m/02lcqs
/m/01wxdn3	/music/artist/track_contributions./music/track_contribution/role	/m/01vj9c
/m/02w9sd7	/award/award_category/nominees./award/award_nomination/nominated_for	/m/0gjk1d
/m/02fsn	/music/instrument/instrumentalists	/m/01yznp
/m/03ksy	/education/educational_institution/students_graduates./education/education/student	/m/0pk41
/m/02_j1w	/sports/sports_position/players./sports/sports_team_roster/team	/m/01vcnl
/m/03f4w4	/people/person/sibling_s./people/sibling_relationship/sibling	/m/02tk74
/m/023wyl	/sports/sports_position/players./sports/sports_team_roster/team	/m/0fgg8c
/m/0gq9h	/award/award_category/nominees./award/award_nomination/nominated_for	/m/0glnm
/m/02tr7d	/award/award_nominee/award_nominations./award/award_nomination/award_nominee	/m/02lfns
/m/02jxbw	/film/film/genre	/m/082gq
/m/0kvb6p	/award/award_winning_work/awards_won./award/award_honor/award	/m/02z1nbg
/m/01b39j	/organization/organization/headquarters./location/mailing_address/citytown	/m/0fpzwf
/m/0g56t9t	/film/film/release_date_s./film/film_regional_release_date/film_release_region	/m/05sb1
/m/07gp9	/film/film/executive_produced_by	/m/07f8wg
/m/02ph9tm	/film/film/production_companies	/m/017s11
/m/07szy	/education/educational_institution/students_graduates./education/education/student	/m/01whg97
/m/02g_6j	/sports/sports_position/players./sports/sports_team_roster/team	/m/06rny
/m/09b69	/location/location/partially_contains	/m/07t21
/m/0xc9x	/location/location/time_zones	/m/02lcqs
/m/01qb5d	/film/film/genre	/m/01hmnh
/m/05zl0	/education/educational_institution/colors	/m/0jc_p
/m/07y_7	/music/performance_role/regular_performances./music/group_membership/group	/m/06nv27
/m/0d9v9q	/people/person/place_of_birth	/m/0m75g
/m/011ycb	/award/award_winning_work/awards_won./award/award_honor/award_winner	/m/0gs1_
/m/01s7zw	/film/actor/film./film/performance/film	/m/0fr63l
/m/0m_v0	/award/award_nominee/award_nominations./award/award_nomination/nominated_for	/m/05jzt3
/m/0d500h	/award/award_nominee/award_nominations./award/award_nomination/nominated_for	/m/02nczh
/m/0n00	/people/person/places_lived./people/place_lived/location	/m/01dzq6
/m/04gtdnh	/award/award_winner/awards_won./award/award_honor/award_winner	/m/0275_pj
/m/02f8lw	/base/popstra/celebrity/dated./base/popstra/dated/participant	/m/0zjpz
[truncated: 2,145 more rows]
