# Supplementary material
Source: ML conference proceedings conference paper supplement (https://proceedings.neurips.cc/paper_files/paper/2021/hash/0fd600c953cde8121262e322ef09f70e-Abstract.html)
Supplement: Supplementary file 1 [file 0fd600c953cde8121262e322ef09f70e-Supplemental.zip › Supplementary_Material_Paper_8745/data/GraIL-BM_fb237_v2/test/test-random-sample/test4.txt]

/m/021_rm	/award/award_winner/awards_won./award/award_honor/award_winner	/m/02p_ycc	1
/m/02py8_w	/music/record_label/artist	/m/03fwln	0
/m/02rb84n	/film/film/production_companies	/m/030_1_	1
/m/0f5xn	/film/film/estimated_budget./measurement_unit/dated_money_value/currency	/m/0c3jz	0
/m/02lnbg	/music/genre/artists	/m/0bqsy	1
/m/0d4htf	/education/educational_degree/people_with_this_degree./education/education/institution	/m/070w7s	0
/m/01n3bm	/people/cause_of_death/people	/m/031y07	1
/m/04cv9m	/user/jg/default_domain/olympic_games/sports	/m/02kzfw	0
/m/0gr0m	/award/award_category/nominees./award/award_nomination/nominated_for	/m/0bcp9b	1
/m/01k1k4	/film/film/genre	/m/01wp8w7	0
/m/01zwy	/people/person/places_lived./people/place_lived/location	/m/03v_5	1
/m/015g28	/music/group_member/membership./music/group_membership/group	/m/02w9sd7	0
/m/02cq61	/education/educational_degree/people_with_this_degree./education/education/institution	/m/07szy	1
/m/0275_pj	/award/award_nominee/award_nominations./award/award_nomination/award_nominee	/m/0b4lkx	0
/m/01sb5r	/people/person/profession	/m/09jwl	1
/m/0517bc	/olympics/olympic_participating_country/athletes./olympics/olympic_athlete_affiliation/olympics	/m/01r3hr	0
/m/0272vm	/soccer/football_team/current_roster./soccer/football_roster_position/position	/m/02_j1w	1
/m/04y5j64	/location/statistical_region/places_exported_to./location/imports_and_exports/exported_to	/m/057lbk	0
/m/016xh5	/people/person/spouse_s./people/marriage/spouse	/m/01pnn3	1
/m/06n3y	/education/university/local_tuition./measurement_unit/dated_money_value/currency	/m/01j59b0	0
/m/0jtg0	/music/performance_role/regular_performances./music/group_membership/role	/m/01vj9c	1
/m/0bqsy	/film/film/story_by	/m/09rx7tx	0
/m/0c921	/award/award_winner/awards_won./award/award_honor/award_winner	/m/06l6nj	1
/m/01hqk	/tv/tv_program/languages	/m/01r216	0
/m/02cx90	/people/person/profession	/m/09jwl	1
/m/0xl08	/medicine/disease/risk_factors	/m/0vhm	0
/m/035yn8	/film/film/release_date_s./film/film_regional_release_date/film_release_region	/m/03h64	1
/m/04m064	/people/ethnicity/people	/m/01r3hr	0
/m/0c11mj	/soccer/football_player/current_team./sports/sports_team_roster/team	/m/05511w	1
/m/01j7pt	/influence/influence_node/peers./influence/peer_relationship/peers	/m/067x44	0
/m/056878	/award/award_ceremony/awards_presented./award/award_honor/award_winner	/m/02l840	1
/m/0kv5t	/film/film_distributor/films_distributed./film/film_film_distributor_relationship/film	/m/03bggl	0
/m/02822	/education/field_of_study/students_majoring./education/education/student	/m/0c3p7	1
/m/02hwww	/tv/tv_program/regular_cast./tv/regular_tv_appearance/actor	/m/043vc	0
/m/02vz6dn	/film/film/release_date_s./film/film_regional_release_date/film_release_region	/m/03rjj	1
/m/0ct9_	/music/performance_role/regular_performances./music/group_membership/role	/m/06gd4	0
/m/0lkr7	/film/actor/film./film/performance/film	/m/024mpp	1
/m/01rnly	/film/film/executive_produced_by	/m/01w56k	0
/m/03qbnj	/award/award_category/winners./award/award_honor/award_winner	/m/01wdqrx	1
/m/04_bfq	/film/film/release_date_s./film/film_regional_release_date/film_regional_debut_venue	/m/02p3my	0
/m/01gqfm	/olympics/olympic_sport/athletes./olympics/olympic_athlete_affiliation/country	/m/05r4w	1
/m/03_qj1	/people/deceased_person/place_of_burial	/m/0b5ysl	0
/m/0170s4	/base/popstra/celebrity/dated./base/popstra/dated/participant	/m/0c3p7	1
/m/03g9xj	/film/film/language	/m/07hgkd	0
/m/02j3d4	/award/award_winner/awards_won./award/award_honor/award_winner	/m/011zf2	1
/m/0h407	/film/film_distributor/films_distributed./film/film_film_distributor_relationship/film	/m/01w8sf	0
/m/0f4m2z	/film/film/release_date_s./film/film_regional_release_date/film_release_region	/m/06mkj	1
/m/0fq27fp	/film/actor/film./film/performance/film	/m/08pth9	0
/m/0k4f3	/film/film/produced_by	/m/0c921	1
/m/02qhm3	/music/group_member/membership./music/group_membership/role	/m/028d4v	0
/m/02v0ff	/people/person/profession	/m/0cbd2	1
/m/04jlgp	/military/military_conflict/combatants./military/military_combatant_group/combatants	/m/01qb5d	0
/m/02_j1w	/sports/sports_position/players./sports/sports_team_roster/team	/m/03h0k1	1
/m/0hkwr	/film/film/dubbing_performances./film/dubbing_performance/actor	/m/012vf6	0
/m/02lfp4	/award/award_nominee/award_nominations./award/award_nomination/award_nominee	/m/01pbwwl	1
/m/0h1fktn	/music/record_label/artist	/m/0jgwf	0
/m/0gbfn9	/film/film/release_date_s./film/film_regional_release_date/film_release_region	/m/05r4w	1
/m/08pth9	/business/job_title/people_with_this_title./business/employment_tenure/company	/m/02_1rq	0
/m/048cl	/people/person/nationality	/m/0345h	1
/m/01xllf	/base/popstra/celebrity/friendship./base/popstra/friendship/participant	/m/0dsb_yy	0
/m/02vjp3	/film/film/country	/m/03rjj	1
/m/03f2_rc	/government/legislative_session/members./government/government_position_held/legislative_sessions	/m/041wm	0
/m/02pt6k_	/people/person/place_of_birth	/m/06wxw	1
/m/04rsd2	/film/film/cinematography	/m/0gq9h	0
/m/033tf_	/people/ethnicity/people	/m/04xhwn	1
/m/04cv9m	/location/location/partially_contains	/m/09qh1	0
/m/03_wvl	/award/award_winner/awards_won./award/award_honor/award_winner	/m/03_wtr	1
/m/02py8_w	/film/film/written_by	/m/01pny5	0
/m/03c7ln	/music/group_member/membership./music/group_membership/group	/m/0khth	1
/m/027bs_2	/sports/professional_sports_team/draft_picks./sports/sports_league_draft_pick/draft	/m/051qvn	0
/m/013q07	/film/film/language	/m/03_9r	1
/m/0854hr	/film/film/film_production_design_by	/m/045346	0
/m/0fdys	/education/field_of_study/students_majoring./education/education/student	/m/0n6f8	1
/m/02w9sd7	/government/politician/government_positions_held./government/government_position_held/basic_title	/m/030_1_	0
/m/02lnbg	/music/genre/artists	/m/01vtj38	1
/m/0cmc2	/time/event/locations	/m/0dprg	0
/m/0208wk	/award/award_category/disciplines_or_subjects	/m/02xlf	1
/m/03xks	/film/film/story_by	/m/04bdzg	0
/m/0qpjt	/location/hud_county_place/county	/m/0m27n	1
/m/0jmgb	/user/alexander/philosophy/philosopher/interests	/m/018d6l	0
/m/03qmx_f	/people/person/nationality	/m/06q1r	1
/m/056878	/film/film/release_date_s./film/film_regional_release_date/film_release_region	/m/0h0jz	0
/m/01vj9c	/music/performance_role/regular_performances./music/group_membership/group	/m/079kr	1
/m/05cwl_	/celebrities/celebrity/celebrity_friends./celebrities/friendship/friend	/m/09ld6g	0
/m/015l4k	/olympics/olympic_games/sports	/m/09_94	1
/m/0ds460j	/education/university/domestic_tuition./measurement_unit/dated_money_value/currency	/m/05j49	0
/m/046m59	/award/award_nominee/award_nominations./award/award_nomination/award_nominee	/m/016kft	1
/m/04m064	/celebrities/celebrity/celebrity_friends./celebrities/friendship/friend	/m/0flry	0
/m/0nk72	/influence/influence_node/influenced_by	/m/03sbs	1
/m/027r7k	/base/popstra/celebrity/canoodled./base/popstra/canoodled/participant	/m/0dsb_yy	0
/m/0gq_v	/award/award_category/nominees./award/award_nomination/nominated_for	/m/017gm7	1
/m/0j862	/music/record_label/artist	/m/03bggl	0
/m/0582cf	/film/actor/film./film/performance/film	/m/02qhqz4	1
/m/04lc0h	/music/instrument/instrumentalists	/m/015zyd	0
/m/02vxn	/education/field_of_study/students_majoring./education/education/major_field_of_study	/m/05qdh	1
/m/02b1gz	/education/field_of_study/students_majoring./education/education/student	/m/0265vcb	0
/m/02py8_w	/sports/sports_team/colors	/m/0jc_p	1
/m/01rnly	/food/food/nutrients./food/nutrition_fact/nutrient	/m/02qr69m	0
/m/02x1dht	/award/award_category/nominees./award/award_nomination/nominated_for	/m/02rn00y	1
/m/0c1sgd3	/organization/organization/headquarters./location/mailing_address/citytown	/m/0bqsy	0
/m/07r_dg	/film/actor/film./film/performance/film	/m/091rc5	1
/m/03gj2	/people/person/employment_history./business/employment_tenure/company	/m/041wm	0
/m/03c602	/music/artist/origin	/m/056_y	1
/m/0l8g0	/education/university/international_tuition./measurement_unit/dated_money_value/currency	/m/0gmgwnv	0
/m/03_wvl	/award/award_winner/awards_won./award/award_honor/award_winner	/m/01sl1q	1
/m/02lbrd	/people/person/religion	/m/05r4w	0
/m/043vc	/sports/professional_sports_team/draft_picks./sports/sports_league_draft_pick/draft	/m/092j54	1
/m/0m4yg	/government/political_party/politicians_in_this_party./government/political_party_tenure/politician	/m/03fwln	0
/m/02_j1w	/sports/sports_position/players./sports/sports_team_roster/team	/m/04knvh	1
/m/05cgy8	/base/aareas/schema/administrative_area/capital	/m/0t_2	0
/m/0ws7	/sports/sports_team/roster./american_football/football_historical_roster_position/position_s	/m/01_9c1	1
/m/04j_h4	/people/ethnicity/languages_spoken	/m/033cnk	0
/m/01kws3	/tv/tv_producer/programs_produced./tv/tv_producer_term/program	/m/0kfpm	1
/m/05jzt3	/award/award_winner/awards_won./award/award_honor/award_winner	/m/035yn8	0
/m/0237fw	/base/popstra/celebrity/breakup./base/popstra/breakup/participant	/m/01z0rcq	1
/m/08pth9	/base/popstra/celebrity/friendship./base/popstra/friendship/participant	/m/09p4w8	0
/m/02py8_w	/sports/sports_team/colors	/m/01g5v	1
/m/02hwww	/base/popstra/location/vacationers./base/popstra/vacation_choice/vacationer	/m/0q_xk	0
/m/0gq_v	/award/award_category/nominees./award/award_nomination/nominated_for	/m/09gq0x5	1
/m/0207wx	/medicine/disease/risk_factors	/m/04cv9m	0
/m/07l50vn	/film/film/release_date_s./film/film_regional_release_date/film_release_region	/m/03gj2	1
/m/02hwww	/people/person/profession	/m/01c9jp	0
/m/09rx7tx	/film/film/personal_appearances./film/personal_film_appearance/person	/m/02m3sd	1
/m/0124ld	/user/jg/default_domain/olympic_games/sports	/m/03p2m1	0
/m/026t6	/music/performance_role/track_performances./music/track_contribution/role	/m/07y_7	1
/m/02m3sd	/soccer/football_player/current_team./sports/sports_team_roster/team	/m/05d49	0
/m/01bns_	/music/performance_role/track_performances./music/track_contribution/role	/m/026t6	1
/m/01pny5	/location/location/contains	/m/01r3hr	0
/m/0bjrnt	/education/educational_degree/people_with_this_degree./education/education/major_field_of_study	/m/05qjt	1
/m/01w8sf	/location/statistical_region/religions./location/religion_percentage/religion	/m/02b1gz	0
/m/03_wvl	/award/award_nominee/award_nominations./award/award_nomination/award_nominee	/m/01sl1q	1
/m/0zm1	/award/award_nominee/award_nominations./award/award_nomination/nominated_for	/m/01w56k	0
/m/0345h	/media_common/netflix_genre/titles	/m/085ccd	1
/m/02qhm3	/film/film/cinematography	/m/04wvhz	0
/m/015g28	/film/film/language	/m/04306rv	1
/m/01sb5r	/medicine/disease/risk_factors	/m/026qnh6	0
/m/03bwzr4	/education/educational_degree/people_with_this_degree./education/education/major_field_of_study	/m/02_7t	1
/m/018d6l	/location/statistical_region/places_exported_to./location/imports_and_exports/exported_to	/m/016kft	0
/m/011k_j	/music/instrument/family	/m/026t6	1
/m/01pwz	/government/legislative_session/members./government/government_position_held/district_represented	/m/0207wx	0
/m/060bp	/government/government_office_category/officeholders./government/government_position_held/jurisdiction_of_office	/m/01n8qg	1
/m/02d4ct	/people/person/employment_history./business/employment_tenure/company	/m/03gj2	0
/m/01k70_	/award/award_winner/awards_won./award/award_honor/award_winner	/m/02qssrm	1
/m/0yldt	/film/film/genre	/m/04jpl	0
/m/0yfvf	/location/location/time_zones	/m/02hcv8	1
/m/0h1fktn	/people/person/places_lived./people/place_lived/location	/m/03p2m1	0
/m/021y7yw	/award/award_winning_work/awards_won./award/award_honor/award	/m/0fq9zdn	1
/m/0d1mp3	/people/person/employment_history./business/employment_tenure/company	/m/01_f_5	0
/m/06q07	/base/schemastaging/organization_extra/phone_number./base/schemastaging/phone_sandbox/service_language	/m/03_9r	1
/m/01_f_5	/film/film/film_production_design_by	/m/062zm5h	0
/m/019f4v	/award/award_category/nominees./award/award_nomination/nominated_for	/m/011ycb	1
/m/01r3hr	/education/field_of_study/students_majoring./education/education/major_field_of_study	/m/01tt43d	0
/m/0f4m2z	/film/film/release_date_s./film/film_regional_release_date/film_release_region	/m/03rjj	1
/m/0hkwr	/award/award_winning_work/awards_won./award/award_honor/award	/m/02w9sd7	0
/m/0gq_d	/award/award_category/winners./award/award_honor/ceremony	/m/02jp5r	1
/m/03g9xj	/award/award_nominee/award_nominations./award/award_nomination/award_nominee	/m/06gd4	0
/m/0cc56	/location/location/adjoin_s./location/adjoining_relationship/adjoins	/m/02m4d	1
/m/0ptxj	/people/person/employment_history./business/employment_tenure/company	/m/0b4lkx	0
/m/0525b	/award/award_nominee/award_nominations./award/award_nomination/award_nominee	/m/05dbf	1
/m/0fpj4lx	/music/instrument/family	/m/0265vcb	0
/m/0d500h	/people/person/places_lived./people/place_lived/location	/m/0cc56	1
/m/02m3sd	/tv/tv_program/languages	/m/03hpkp	0
/m/046m59	/film/actor/film./film/performance/film	/m/07gp9	1
/m/01tt43d	/music/instrument/instrumentalists	/m/07hgkd	0
/m/019f4v	/award/award_category/nominees./award/award_nomination/nominated_for	/m/035yn8	1
/m/0dz3r	/film/film/language	/m/025sf8g	0
/m/0htww	/film/film/release_date_s./film/film_regional_release_date/film_release_region	/m/03rjj	1
/m/0d_rw	/location/hud_county_place/county	/m/046vvc	0
/m/0ddkf	/people/person/places_lived./people/place_lived/location	/m/0ccvx	1
/m/050ks	/music/artist/origin	/m/0n6bs	0
/m/0bjrnt	/education/educational_degree/people_with_this_degree./education/education/institution	/m/0177sq	1
/m/01r3hr	/award/award_winning_work/awards_won./award/award_honor/award_winner	/m/02py8_w	0
/m/0fbw6	/food/food/nutrients./food/nutrition_fact/nutrient	/m/05wvs	1
/m/0h407	/food/food/nutrients./food/nutrition_fact/nutrient	/m/0vhm	0
/m/01mk6	/organization/organization_member/member_of./organization/organization_membership/organization	/m/04k4l	1
/m/043vc	/film/film/edited_by	/m/0h1mt	0
/m/0by1wkq	/film/film/release_date_s./film/film_regional_release_date/film_release_region	/m/03gj2	1
/m/03bggl	/film/film/edited_by	/m/030_1_	0
/m/0c6g1l	/film/actor/film./film/performance/film	/m/08phg9	1
/m/01qx13	/people/person/spouse_s./people/marriage/location_of_ceremony	/m/04lc0h	0
/m/0bjkpt	/award/award_nominee/award_nominations./award/award_nomination/nominated_for	/m/03mh94	1
/m/0cvw9	/award/award_ceremony/awards_presented./award/award_honor/honored_for	/m/0hpt3	0
/m/08b0cj	/sports/pro_athlete/teams./sports/sports_team_roster/team	/m/03h0k1	1
/m/0bynt	/location/location/partially_contains	/m/03p2m1	0
/m/01f_mw	/film/film_distributor/films_distributed./film/film_film_distributor_relationship/film	/m/0y_9q	1
/m/0356gk	/location/statistical_region/places_exported_to./location/imports_and_exports/exported_to	/m/03p7gb	0
/m/011k_j	/music/performance_role/guest_performances./music/recording_contribution/performance_role	/m/026t6	1
/m/03jht	/location/location/adjoin_s./location/adjoining_relationship/adjoins	/m/0ct9_	0
/m/0gq9h	/award/award_category/winners./award/award_honor/award_winner	/m/04wvhz	1
/m/056rgc	/film/film/cinematography	/m/03bggl	0
/m/057lbk	/film/film/other_crew./film/film_crew_gig/film_crew_role	/m/033smt	1
/m/02qggqc	/people/person/religion	/m/04rsd2	0
/m/02qssrm	/award/award_nominee/award_nominations./award/award_nomination/award_nominee	/m/01k70_	1
/m/04kjrv	/government/legislative_session/members./government/government_position_held/district_represented	/m/01yk13	0
/m/07xl34	/organization/role/leaders./organization/leadership/organization	/m/031hxk	1
/m/01vsps	/film/film/country	/m/06n3y	0
/m/0gq9h	/award/award_category/nominees./award/award_nomination/nominated_for	/m/02rn00y	1
/m/01grpq	/award/award_ceremony/awards_presented./award/award_honor/honored_for	/m/01dbk6	0
/m/05kkh	/location/statistical_region/religions./location/religion_percentage/religion	/m/051kv	1
/m/01vw_dv	/people/person/places_lived./people/place_lived/location	/m/01tp5bj	0
/m/011k_j	/music/performance_role/regular_performances./music/group_membership/role	/m/03bx0bm	1
/m/0bh8tgs	/education/educational_institution/students_graduates./education/education/major_field_of_study	/m/0c630	0
/m/058z1hb	/award/award_nominee/award_nominations./award/award_nomination/award	/m/0gq_v	1
/m/056rgc	/tv/tv_writer/tv_programs./tv/tv_program_writer_relationship/tv_program	/m/01lct6	0
/m/0bvzp	/award/award_nominee/award_nominations./award/award_nomination/award	/m/02581c	1
/m/01w8sf	/award/award_winning_work/awards_won./award/award_honor/award	/m/04jpk2	0
/m/0187y5	/base/popstra/celebrity/dated./base/popstra/dated/participant	/m/0cbkc	1
/m/0zm1	/olympics/olympic_sport/athletes./olympics/olympic_athlete_affiliation/country	/m/03p85	0
/m/017s11	/award/award_nominee/award_nominations./award/award_nomination/award	/m/0gq_d	1
/m/03f2_rc	/sports/sports_team/roster./american_football/football_historical_roster_position/position_s	/m/0flry	0
/m/05zvj3m	/award/award_category/nominees./award/award_nomination/nominated_for	/m/01k0vq	1
/m/0c630	/people/cause_of_death/people	/m/01_gv	0
/m/03q5t	/music/performance_role/track_performances./music/track_contribution/role	/m/07y_7	1
/m/031y07	/people/ethnicity/languages_spoken	/m/027z0pl	0
/m/03_gz8	/film/film/genre	/m/02p0szs	1
/m/015g28	/sports/sports_team/roster./american_football/football_historical_roster_position/position_s	/m/01c9jp	0
/m/0bh8tgs	/film/film/release_date_s./film/film_regional_release_date/film_release_region	/m/06mkj	1
/m/0qpn9	/film/film/costume_design_by	/m/03_wm6	0
/m/0h0jz	/film/actor/film./film/performance/film	/m/03x7hd	1
/m/014clr	/education/field_of_study/students_majoring./education/education/student	/m/0bt7w	0
/m/033tf_	/people/ethnicity/people	/m/0h1mt	1
/m/04_bfq	/base/popstra/celebrity/breakup./base/popstra/breakup/participant	/m/0flry	0
/m/07gp9	/film/film/featured_film_locations	/m/0q_xk	1
/m/02b185	/people/deceased_person/place_of_burial	/m/0bh8tgs	0
/m/03dj48	/base/x2010fifaworldcupsouthafrica/world_cup_squad/current_world_cup_squad./base/x2010fifaworldcupsouthafrica/current_world_cup_squad/current_club	/m/0hvgt	1
/m/07nt8p	/film/film/executive_produced_by	/m/01hqk	0
/m/01vsps	/people/person/place_of_birth	/m/096gm	1
/m/0517bc	/film/film/other_crew./film/film_crew_gig/film_crew_role	/m/0fq27fp	0
/m/07vyf	/education/educational_institution/students_graduates./education/education/major_field_of_study	/m/02_7t	1
/m/03_qj1	/location/location/time_zones	/m/07s95_l	0
/m/099c8n	/award/award_category/nominees./award/award_nomination/nominated_for	/m/05jzt3	1
/m/0f5xn	/base/culturalevent/event/entity_involved	/m/070zc	0
/m/01p1z_	/award/award_nominee/award_nominations./award/award_nomination/award	/m/0gqy2	1
/m/03g9xj	/base/marchmadness/ncaa_basketball_tournament/seeds./base/marchmadness/ncaa_tournament_seed/team	/m/03fts	0
/m/017m2y	/base/popstra/celebrity/friendship./base/popstra/friendship/participant	/m/0zjpz	1
/m/0lcx	/education/university/domestic_tuition./measurement_unit/dated_money_value/currency	/m/04mhl	0
/m/078lk	/location/administrative_division/first_level_division_of	/m/03rjj	1
/m/0863x_	/film/film/production_companies	/m/01j7pt	0
/m/03ym1	/award/award_nominee/award_nominations./award/award_nomination/award	/m/099ck7	1
/m/0465_	/people/ethnicity/people	/m/04h6m	0
/m/026bt_h	/sports/sports_team/roster./american_football/football_historical_roster_position/position_s	/m/05fyy5	1
/m/0jpn8	/soccer/football_player/current_team./sports/sports_team_roster/team	/m/033smt	0
/m/0fp_xp	/sports/pro_athlete/teams./sports/sports_team_roster/team	/m/02b10w	1
/m/0l14j_	/tv/tv_network/programs./tv/tv_network_duration/program	/m/0gq9h	0
/m/0459q4	/language/human_language/countries_spoken_in	/m/03h64	1
/m/0fpj4lx	/tv/tv_writer/tv_programs./tv/tv_program_writer_relationship/tv_program	/m/016dp0	0
/m/042xh	/people/person/profession	/m/0cbd2	1
/m/0d_rw	/base/x2010fifaworldcupsouthafrica/world_cup_squad/current_world_cup_squad./base/x2010fifaworldcupsouthafrica/current_world_cup_squad/current_club	/m/01xllf	0
/m/011j5x	/music/genre/artists	/m/01wgjj5	1
/m/02_j1w	/people/person/languages	/m/01y998	0
/m/0418154	/award/award_ceremony/awards_presented./award/award_honor/honored_for	/m/02pjc1h	1
/m/01ck6v	/government/legislative_session/members./government/government_position_held/legislative_sessions	/m/0kv5t	0
/m/02tk74	/people/person/place_of_birth	/m/04jpl	1
/m/0d500h	/film/film/other_crew./film/film_crew_gig/crewmember	/m/0cd25	0
/m/033gn8	/education/educational_institution/students_graduates./education/education/student	/m/02661h	1
/m/012ky3	/award/award_winning_work/awards_won./award/award_honor/award_winner	/m/04kjrv	0
/m/024fz9	/award/award_category/winners./award/award_honor/award_winner	/m/0p7h7	1
/m/067x44	/organization/endowed_organization/endowment./measurement_unit/dated_money_value/currency	/m/03_qj1	0
/m/02_j1w	/sports/sports_position/players./sports/sports_team_roster/team	/m/045346	1
/m/0cvw9	/education/university/international_tuition./measurement_unit/dated_money_value/currency	/m/0459q4	0
/m/02v0ff	/award/award_winner/awards_won./award/award_honor/award_winner	/m/02qssrm	1
/m/0465_	/location/statistical_region/places_exported_to./location/imports_and_exports/exported_to	/m/03rt9	0
/m/076psv	/award/award_nominee/award_nominations./award/award_nomination/nominated_for	/m/0kvb6p	1
/m/0c7ct	/location/country/second_level_divisions	/m/0hkwr	0
/m/03rbzn	/olympics/olympic_sport/athletes./olympics/olympic_athlete_affiliation/country	/m/0345h	1
/m/0vhm	/education/educational_degree/people_with_this_degree./education/education/institution	/m/09rx7tx	0
/m/02mxw0	/award/award_nominee/award_nominations./award/award_nomination/award	/m/0bdwqv	1
/m/02xj3rw	/film/film/music	/m/02hxhz	0
/m/02jxkw	/people/person/places_lived./people/place_lived/location	/m/0xl08	1
/m/0n6bs	/people/person/profession	/m/0275_pj	0
/m/033tf_	/people/ethnicity/people	/m/03x16f	1
/m/04mhl	/base/popstra/celebrity/dated./base/popstra/dated/participant	/m/0fm6m8	0
/m/057lbk	/film/film/genre	/m/01hmnh	1
/m/0d500h	/base/popstra/celebrity/dated./base/popstra/dated/participant	/m/0dhdp	0
/m/016_mj	/film/actor/film./film/performance/film	/m/0p9lw	1
/m/0bxjv	/film/film/country	/m/011lpr	0
/m/05_6_y	/soccer/football_player/current_team./sports/sports_team_roster/team	/m/0272vm	1
/m/0863x_	/film/film/other_crew./film/film_crew_gig/film_crew_role	/m/012ky3	0
/m/0k7tq	/film/film/release_date_s./film/film_regional_release_date/film_release_region	/m/05r4w	1
/m/0fltx	/film/film/runtime./film/film_cut/film_release_region	/m/0flry	0
/m/0dlhg	/location/location/time_zones	/m/02hcv8	1
/m/01ry0f	/education/educational_degree/people_with_this_degree./education/education/student	/m/070zc	0
/m/0ft18	/film/film/genre	/m/082gq	1
/m/03xx3m	/base/culturalevent/event/entity_involved	/m/03xx3m	0
/m/015g28	/award/award_winning_work/awards_won./award/award_honor/award_winner	/m/025y9fn	1
/m/027z0pl	/award/ranked_item/appears_in_ranked_lists./award/ranking/list	/m/09d5h	0
/m/02g_6j	/sports/sports_position/players./sports/sports_team_roster/team	/m/025v1sx	1
/m/0dt_q_	/film/film/production_companies	/m/02ddq4	0
/m/0gq_d	/award/award_category/winners./award/award_honor/ceremony	/m/0fzrhn	1
/m/03bggl	/film/film/genre	/m/0cd25	0
/m/01vt5c_	/people/person/places_lived./people/place_lived/location	/m/04jpl	1
/m/01r_t_	/organization/organization/place_founded	/m/0dll_t2	0
/m/0gq9h	/award/award_category/nominees./award/award_nomination/nominated_for	/m/0hv81	1
/m/01y998	/film/film/prequel	/m/03__y	0
/m/03__77	/soccer/football_team/current_roster./sports/sports_team_roster/position	/m/02_j1w	1
/m/01qzyz	/people/deceased_person/place_of_death	/m/08pth9	0
/m/025y9fn	/award/award_nominee/award_nominations./award/award_nomination/award_nominee	/m/07lwsz	1
/m/0ct9_	/people/ethnicity/languages_spoken	/m/017f3m	0
/m/0h1n9	/medicine/disease/risk_factors	/m/02ctzb	1
/m/01dy7j	/education/educational_degree/people_with_this_degree./education/education/major_field_of_study	/m/01grpq	0
/m/04rsd2	/award/award_nominee/award_nominations./award/award_nomination/award_nominee	/m/016xh5	1
/m/047dpm0	/film/actor/film./film/performance/film	/m/0c3jz	0
/m/01hmnh	/media_common/netflix_genre/titles	/m/0d4htf	1
/m/04kjrv	/education/educational_institution/school_type	/m/0gq9h	0
/m/09b0xs	/tv/tv_writer/tv_programs./tv/tv_program_writer_relationship/tv_program	/m/0vhm	1
/m/026qnh6	/film/film/other_crew./film/film_crew_gig/crewmember	/m/0bdwqv	0
/m/04hk0w	/film/film/language	/m/01jb8r	1
/m/01gvxv	/film/film/runtime./film/film_cut/film_release_region	/m/0432cd	0
/m/0bh8tgs	/film/film/other_crew./film/film_crew_gig/film_crew_role	/m/01xy5l_	1
/m/04y5j64	/music/genre/parent_genre	/m/01vj9c	0
/m/02dlh2	/music/performance_role/track_performances./music/track_contribution/role	/m/026t6	1
/m/02cgp8	/award/award_winning_work/awards_won./award/award_honor/award	/m/03_qj1	0
/m/0n5jm	/location/location/adjoin_s./location/adjoining_relationship/adjoins	/m/0mwxz	1
/m/040p_q	/location/administrative_division/first_level_division_of	/m/01vrt_c	0
/m/06bng	/award/award_nominee/award_nominations./award/award_nomination/award	/m/0265vt	1
/m/07zqy	/film/film/story_by	/m/0xpp5	0
/m/05zvj3m	/award/award_category/winners./award/award_honor/award_winner	/m/0n6f8	1
/m/0d2by	/tv/tv_program/languages	/m/01j59b0	0
/m/04wvhz	/award/award_winner/awards_won./award/award_honor/award_winner	/m/07lwsz	1
/m/0c3jz	/military/military_conflict/combatants./military/military_combatant_group/combatants	/m/02vjp3	0
/m/08wq0g	/award/award_nominee/award_nominations./award/award_nomination/award_nominee	/m/0bt7ws	1
/m/07nt8p	/people/deceased_person/place_of_death	/m/09qh1	0
/m/0m_v0	/award/award_winner/awards_won./award/award_honor/award_winner	/m/02cx90	1
/m/01dbhb	/language/human_language/countries_spoken_in	/m/02pt6k_	0
/m/0gqy2	/award/award_category/nominees./award/award_nomination/nominated_for	/m/0jz71	1
/m/0f6lx	/music/artist/contribution./music/recording_contribution/performance_role	/m/0l12d	0
/m/01wdqrx	/award/award_winner/awards_won./award/award_honor/award_winner	/m/01s21dg	1
/m/05bmq	/time/event/locations	/m/092c5f	0
/m/07y_7	/music/instrument/instrumentalists	/m/01tp5bj	1
/m/045346	/film/film/language	/m/035tlh	0
/m/02vy5j	/award/award_nominee/award_nominations./award/award_nomination/nominated_for	/m/09cr8	1
/m/02pt6k_	/film/film/country	/m/01j7pt	0
/m/0t_hx	/location/location/time_zones	/m/02hcv8	1
/m/0jgwf	/award/award_ceremony/awards_presented./award/award_honor/honored_for	/m/0hkwr	0
/m/099c8n	/award/award_category/nominees./award/award_nomination/nominated_for	/m/09k56b7	1
/m/0fzrhn	/soccer/football_team/current_roster./soccer/football_roster_position/position	/m/022fdt	0
/m/0ljbg	/sports/sports_team/colors	/m/01g5v	1
/m/0h407	/location/hud_county_place/county	/m/03m6t5	0
/m/0gh65c5	/film/film/release_date_s./film/film_regional_release_date/film_release_region	/m/03rt9	1
/m/01r_t_	/olympics/olympic_games/sports	/m/016pns	0
/m/0l14j_	/music/performance_role/regular_performances./music/group_membership/role	/m/02fsn	1
/m/01y998	/film/film/estimated_budget./measurement_unit/dated_money_value/currency	/m/04jpk2	0
/m/0gq_v	/award/award_category/nominees./award/award_nomination/nominated_for	/m/083skw	1
/m/02tx6q	/film/film_subject/films	/m/011j5x	0
/m/02dlh2	/music/performance_role/guest_performances./music/recording_contribution/performance_role	/m/0l14j_	1
/m/0bbf1f	/sports/professional_sports_team/draft_picks./sports/sports_league_draft_pick/school	/m/02kzfw	0
/m/01vv6xv	/people/person/profession	/m/0dz3r	1
/m/05wvs	/base/aareas/schema/administrative_area/administrative_parent	/m/01qx13	0
/m/02b1gz	/soccer/football_team/current_roster./soccer/football_roster_position/position	/m/02_j1w	1
/m/0cc1v	/location/administrative_division/country	/m/02kzfw	0
/m/0cq7kw	/film/film/written_by	/m/012wg	1
/m/03bx0bm	/people/profession/specialization_of	/m/015zyd	0
/m/02cx90	/award/award_nominee/award_nominations./award/award_nomination/award_nominee	/m/011zf2	1
/m/016h4r	/people/profession/specialization_of	/m/06gd4	0
/m/0vhm	/award/award_winning_work/awards_won./award/award_honor/award_winner	/m/09b0xs	1
/m/04mhl	/media_common/netflix_genre/titles	/m/0bynt	0
/m/024n3z	/award/award_nominee/award_nominations./award/award_nomination/award_nominee	/m/03ym1	1
/m/0192hw	/location/country/capital	/m/01tt43d	0
/m/01l03w2	/award/award_nominee/award_nominations./award/award_nomination/award_nominee	/m/01k5t_3	1
/m/016dp0	/organization/organization/place_founded	/m/04b5l3	0
/m/0hskw	/award/award_nominee/award_nominations./award/award_nomination/award	/m/0gq9h	1
/m/02pt6k_	/education/educational_institution/students_graduates./education/education/major_field_of_study	/m/0863x_	0
/m/03n3gl	/film/film/genre	/m/05mrx8	1
/m/01pwz	/business/job_title/people_with_this_title./business/employment_tenure/company	/m/016kft	0
/m/050ks	/location/location/contains	/m/0172jm	1
/m/031c2r	/location/location/contains	/m/0dzs0	0
/m/035l_9	/sports/sports_team/colors	/m/01g5v	1
/m/02cgp8	/business/job_title/people_with_this_title./business/employment_tenure/company	/m/0dtw1x	0
/m/02lf1j	/people/person/places_lived./people/place_lived/location	/m/0d6lp	1
/m/0418154	/base/popstra/celebrity/canoodled./base/popstra/canoodled/participant	/m/01g6bk	0
/m/0gqy2	/award/award_category/winners./award/award_honor/ceremony	/m/0bzmt8	1
/m/0gt14	/base/schemastaging/organization_extra/phone_number./base/schemastaging/phone_sandbox/service_location	/m/0n2sh	0
/m/05qdh	/education/field_of_study/students_majoring./education/education/major_field_of_study	/m/02822	1
/m/01wp8w7	/organization/organization_member/member_of./organization/organization_membership/organization	/m/02ddq4	0
/m/04btyz	/media_common/netflix_genre/titles	/m/0bxsk	1
/m/01bdxz	/location/hud_county_place/county	/m/024hh1	0
/m/0bbf1f	/film/actor/film./film/performance/film	/m/0ch3qr1	1
/m/02cgp8	/film/film/featured_film_locations	/m/03fwln	0
/m/02vp1f_	/film/film/genre	/m/01hmnh	1
/m/04b5l3	/people/ethnicity/geographic_distribution	/m/02b1gz	0
/m/01s21dg	/people/person/profession	/m/01xy5l_	1
/m/03gj2	/sports/professional_sports_team/draft_picks./sports/sports_league_draft_pick/draft	/m/08b0cj	0
/m/02tk74	/people/person/places_lived./people/place_lived/location	/m/04jpl	1
/m/02gnh0	/sports/pro_athlete/teams./sports/sports_team_roster/team	/m/0bt7w	0
/m/0gq9h	/award/award_category/nominees./award/award_nomination/nominated_for	/m/08xvpn	1
/m/0d500h	/film/film_subject/films	/m/0c630	0
/m/06r_by	/people/person/profession	/m/0dgd_	1
/m/0f5kw7	/medicine/disease/notable_people_with_this_condition	/m/0h407	0
/m/0gr0m	/award/award_category/winners./award/award_honor/award_winner	/m/06hzsx	1
/m/07vfz	/music/group_member/membership./music/group_membership/group	/m/026n998	0
/m/026t6	/music/performance_role/track_performances./music/track_contribution/role	/m/02fsn	1
/m/0h407	/sports/professional_sports_team/draft_picks./sports/sports_league_draft_pick/school	/m/051qvn	0
/m/0h95927	/film/film/release_date_s./film/film_regional_release_date/film_release_region	/m/06mkj	1
/m/0d1mp3	/award/award_category/disciplines_or_subjects	/m/01j7pt	0
/m/0fzrhn	/award/award_ceremony/awards_presented./award/award_honor/award_winner	/m/0c6g29	1
/m/0gfw56	/award/award_nominated_work/award_nominations./award/award_nomination/nominated_for	/m/0hwqz	0
/m/0372kf	/people/person/religion	/m/051kv	1
/m/04lc0h	/celebrities/celebrity/celebrity_friends./celebrities/friendship/friend	/m/02w86hz	0
/m/053yx	/award/award_nominee/award_nominations./award/award_nomination/award	/m/02tj96	1
/m/0c6g1l	/location/location/contains	/m/0c1sgd3	0
/m/0gj50	/award/award_winning_work/awards_won./award/award_honor/award	/m/02pz3j5	1
/m/03_wtr	/user/jg/default_domain/olympic_games/sports	/m/033smt	0
/m/018d6l	/people/person/profession	/m/09jwl	1
/m/027bs_2	/tv/tv_network/programs./tv/tv_network_duration/program	/m/0459q4	0
/m/02p_ycc	/award/award_winner/awards_won./award/award_honor/award_winner	/m/021_rm	1
/m/03bx0bm	/olympics/olympic_participating_country/athletes./olympics/olympic_athlete_affiliation/olympics	/m/0ct9_	0
/m/0gj8nq2	/film/film/release_date_s./film/film_regional_release_date/film_release_region	/m/03h2c	1
/m/07s95_l	/base/schemastaging/organization_extra/phone_number./base/schemastaging/phone_sandbox/service_location	/m/016h4r	0
/m/017s11	/film/film_distributor/films_distributed./film/film_film_distributor_relationship/film	/m/021pqy	1
/m/017gm7	/people/person/religion	/m/08y2fn	0
/m/04lqvlr	/film/film/country	/m/03rjj	1
/m/0dqzkv	/tv/tv_program/genre	/m/050ks	0
/m/02fsn	/music/performance_role/track_performances./music/track_contribution/role	/m/0dwt5	1
/m/025y9fn	/film/film/estimated_budget./measurement_unit/dated_money_value/currency	/m/02qsjt	0
/m/03rbzn	/olympics/olympic_sport/athletes./olympics/olympic_athlete_affiliation/country	/m/05r4w	1
/m/04lc0h	/film/film/written_by	/m/04kjrv	0
/m/01k8q5	/education/university/international_tuition./measurement_unit/dated_money_value/currency	/m/01nv4h	1
/m/06gd4	/award/award_category/nominees./award/award_nomination/nominated_for	/m/027r7k	0
/m/0dwt5	/music/performance_role/regular_performances./music/group_membership/role	/m/03q5t	1
/m/01f8hf	/sports/professional_sports_team/draft_picks./sports/sports_league_draft_pick/school	/m/07vfz	0
/m/026mj	/location/location/time_zones	/m/02hcv8	1
/m/02bp37	/government/politician/government_positions_held./government/government_position_held/jurisdiction_of_office	/m/032v0v	0
/m/02dlh2	/music/performance_role/regular_performances./music/group_membership/role	/m/0l14j_	1
/m/017gm7	/media_common/netflix_genre/titles	/m/02qhqz4	0
/m/0486tv	/olympics/olympic_sport/athletes./olympics/olympic_athlete_affiliation/country	/m/0j1z8	1
/m/0n6bs	/business/job_title/people_with_this_title./business/employment_tenure/company	/m/04jlgp	0
/m/0d68qy	/tv/tv_program/genre	/m/06nbt	1
/m/0bqsy	/soccer/football_team/current_roster./sports/sports_team_roster/position	/m/0dtw1x	0
/m/028d4v	/award/award_nominee/award_nominations./award/award_nomination/award_nominee	/m/073749	1
/m/0353xq	/base/popstra/location/vacationers./base/popstra/vacation_choice/vacationer	/m/04bdzg	0
/m/07mz77	/people/person/nationality	/m/0345h	1
/m/02z1nbg	/tv/tv_producer/programs_produced./tv/tv_producer_term/program	/m/05j49	0
/m/0kzy0	/award/award_nominee/award_nominations./award/award_nomination/award	/m/03qbnj	1
/m/0l12d	/award/award_category/nominees./award/award_nomination/nominated_for	/m/037w7r	0
/m/04x1_w	/film/actor/film./film/performance/film	/m/03bx2lk	1
/m/0bdwqv	/location/capital_of_administrative_division/capital_of./location/administrative_division_capital_relationship/administrative_division	/m/030_1_	0
/m/015pxr	/award/award_nominee/award_nominations./award/award_nomination/award	/m/0bdwqv	1
/m/0h1mt	/organization/organization_member/member_of./organization/organization_membership/organization	/m/062zm5h	0
/m/03qnvdl	/film/film/release_date_s./film/film_regional_release_date/film_release_region	/m/05sb1	1
/m/01w56k	/sports/sports_league_draft/picks./sports/sports_league_draft_pick/school	/m/031c2r	0
/m/05dss7	/film/film/other_crew./film/film_crew_gig/crewmember	/m/02xc1w4	1
/m/0dzs0	/location/statistical_region/places_exported_to./location/imports_and_exports/exported_to	/m/06gd4	0
/m/02_hj4	/award/award_winner/awards_won./award/award_honor/award_winner	/m/06lvlf	1
/m/06q07	/government/government_office_category/officeholders./government/government_position_held/jurisdiction_of_office	/m/03_9r	0
/m/0gtvrv3	/film/film/release_date_s./film/film_regional_release_date/film_release_region	/m/03h64	1
/m/01vj9c	/location/location/partially_contains	/m/0ct9_	0
/m/08phg9	/award/award_winning_work/awards_won./award/award_honor/award_winner	/m/024n3z	1
/m/0127s7	/sports/sports_team/roster./american_football/football_historical_roster_position/position_s	/m/0gq9h	0
/m/01g4yw	/education/university/international_tuition./measurement_unit/dated_money_value/currency	/m/01nv4h	1
/m/016pns	/celebrities/celebrity/celebrity_friends./celebrities/friendship/friend	/m/0dl9_4	0
/m/018yj6	/people/person/profession	/m/0cbd2	1
/m/0459q4	/organization/organization_member/member_of./organization/organization_membership/organization	/m/027bs_2	0
/m/01s1zk	/people/person/profession	/m/0dz3r	1
/m/0hx4y	/people/person/languages	/m/03xx3m	0
/m/0gjc4d3	/film/film/release_date_s./film/film_regional_release_date/film_release_region	/m/03h64	1
/m/07vfz	/education/university/fraternities_and_sororities	/m/029sk	0
/m/02v0ff	/award/award_winner/awards_won./award/award_honor/award_winner	/m/06jvj7	1
/m/0459q4	/film/actor/film./film/performance/film	/m/09rx7tx	0
/m/092c5f	/award/award_ceremony/awards_presented./award/award_honor/award_winner	/m/02661h	1
/m/03c3jzx	/film/film/music	/m/01tt43d	0
/m/02w9sd7	/award/award_category/nominees./award/award_nomination/nominated_for	/m/04q01mn	1
/m/027bs_2	/military/military_conflict/combatants./military/military_combatant_group/combatants	/m/0t_gg	0
/m/06jnvs	/tv/tv_producer/programs_produced./tv/tv_producer_term/program	/m/0557yqh	1
/m/0d4htf	/film/film/estimated_budget./measurement_unit/dated_money_value/currency	/m/01qb5d	0
/m/0gr0m	/award/award_category/nominees./award/award_nomination/nominated_for	/m/02rb607	1
/m/0m75g	/government/legislative_session/members./government/government_position_held/district_represented	/m/073749	0
/m/03078l	/soccer/football_team/current_roster./soccer/football_roster_position/position	/m/02_j1w	1
/m/06dfg	/education/educational_institution/school_type	/m/01lxd4	0
/m/070w7s	/award/award_nominee/award_nominations./award/award_nomination/nominated_for	/m/0gj50	1
/m/03_wm6	/music/artist/origin	/m/056878	0
/m/09fb5	/film/actor/film./film/performance/film	/m/04jpk2	1
/m/0gq9h	/people/person/sibling_s./people/sibling_relationship/sibling	/m/047dpm0	0
/m/0f40w	/award/award_nominated_work/award_nominations./award/award_nomination/nominated_for	/m/02725hs	1
/m/03_wm6	/olympics/olympic_games/sports	/m/0n5by	0
/m/0mx6c	/location/location/time_zones	/m/02lcqs	1
/m/045346	/education/field_of_study/students_majoring./education/education/student	/m/0t_gg	0
/m/02j8nx	/people/person/profession	/m/0cbd2	1
/m/0bt7w	/location/capital_of_administrative_division/capital_of./location/administrative_division_capital_relationship/administrative_division	/m/02lfp4	0
/m/0c_dx	/award/award_category/winners./award/award_honor/award_winner	/m/073v6	1
/m/0bzlrh	/base/marchmadness/ncaa_basketball_tournament/seeds./base/marchmadness/ncaa_tournament_seed/team	/m/030_1_	0
/m/06jnvs	/people/person/profession	/m/0cbd2	1
/m/04gc2	/award/award_category/winners./award/award_honor/ceremony	/m/01vsps	0
/m/07lwsz	/award/award_winner/awards_won./award/award_honor/award_winner	/m/04wvhz	1
/m/021b_	/government/political_party/politicians_in_this_party./government/political_party_tenure/politician	/m/0b4lkx	0
/m/02_p8v	/award/award_nominee/award_nominations./award/award_nomination/nominated_for	/m/026zlh9	1
/m/02vxn	/base/x2010fifaworldcupsouthafrica/world_cup_squad/current_world_cup_squad./base/x2010fifaworldcupsouthafrica/current_world_cup_squad/current_club	/m/0dhd5	0
/m/0c921	/award/award_nominee/award_nominations./award/award_nomination/nominated_for	/m/0k4f3	1
/m/0d_rw	/education/educational_institution/students_graduates./education/education/student	/m/0356gk	0
/m/07s6fsf	/education/educational_degree/people_with_this_degree./education/education/institution	/m/03ksy	1
/m/047dpm0	/government/politician/government_positions_held./government/government_position_held/jurisdiction_of_office	/m/02z1nbg	0
/m/01hmnh	/media_common/netflix_genre/titles	/m/0bl3nn	1
/m/03jht	/film/film/costume_design_by	/m/06w38l	0
/m/02cx90	/award/award_nominee/award_nominations./award/award_nomination/award_nominee	/m/01m15br	1
/m/01sbv9	/base/schemastaging/organization_extra/phone_number./base/schemastaging/phone_sandbox/service_language	/m/01xllf	0
/m/037w7r	/film/actor/film./film/performance/film	/m/02vr3gz	1
/m/03bggl	/film/film/produced_by	/m/0bh8tgs	0
/m/04svwx	/tv/tv_program/languages	/m/03_9r	1
/m/02py8_w	/film/film/costume_design_by	/m/019z7b	0
/m/02jp5r	/award/award_ceremony/awards_presented./award/award_honor/award_winner	/m/0c4f4	1
/m/070zc	/music/group_member/membership./music/group_membership/role	/m/012ky3	0
/m/03rjj	/media_common/netflix_genre/titles	/m/02psgq	1
/m/02cgp8	/location/location/contains	/m/05jzt3	0
/m/02w9sd7	/award/award_category/winners./award/award_honor/award_winner	/m/016yvw	1
/m/04kjrv	/location/location/partially_contains	/m/01w03jv	0
/m/0gs1_	/award/award_nominee/award_nominations./award/award_nomination/award	/m/019f4v	1
/m/02vjp3	/olympics/olympic_sport/athletes./olympics/olympic_athlete_affiliation/country	/m/02x8s9	0
/m/017gm7	/film/film/release_date_s./film/film_regional_release_date/film_release_region	/m/03rt9	1
/m/0163m1	/sports/professional_sports_team/draft_picks./sports/sports_league_draft_pick/school	/m/0dprg	0
/m/02q52q	/award/ranked_item/appears_in_ranked_lists./award/ranking/list	/m/05glt	1
/m/0356gk	/medicine/disease/notable_people_with_this_condition	/m/01bdxz	0
/m/0d6lp	/sports/sports_team_location/teams	/m/06rny	1
/m/06y611	/award/award_ceremony/awards_presented./award/award_honor/award_winner	/m/04cv9m	0
/m/01w92	/organization/organization/headquarters./location/mailing_address/citytown	/m/04jpl	1
/m/0f5kw7	/tv/tv_program/program_creator	/m/0dbpwb	0
/m/0jtg0	/music/performance_role/regular_performances./music/group_membership/role	/m/03bx0bm	1
/m/01r216	/award/award_nominated_work/award_nominations./award/award_nomination/nominated_for	/m/07vfz	0
/m/06jnvs	/award/award_nominee/award_nominations./award/award_nomination/award	/m/0cjyzs	1
/m/035yn8	/location/location/adjoin_s./location/adjoining_relationship/adjoins	/m/0t_gg	0
/m/01q7cb_	/base/popstra/celebrity/canoodled./base/popstra/canoodled/participant	/m/0c3jz	1
/m/0dzs0	/film/film/release_date_s./film/film_regional_release_date/film_regional_debut_venue	/m/01nxfc	0
/m/024n3z	/award/award_nominee/award_nominations./award/award_nomination/award_nominee	/m/0c6g1l	1
/m/0cvw9	/location/hud_county_place/county	/m/03fyrh	0
/m/01nd2c	/soccer/football_team/current_roster./soccer/football_roster_position/position	/m/02_j1w	1
/m/01yk13	/award/award_nominee/award_nominations./award/award_nomination/award_nominee	/m/0b4lkx	0
/m/02yxh9	/award/award_ceremony/awards_presented./award/award_honor/honored_for	/m/011yl_	1
/m/05wvs	/business/job_title/people_with_this_title./business/employment_tenure/company	/m/026mj	0
/m/02661h	/people/person/places_lived./people/place_lived/location	/m/01fscv	1
/m/01r3hr	/award/award_winning_work/awards_won./award/award_honor/honored_for	/m/06w38l	0
/m/0fb1q	/people/person/places_lived./people/place_lived/location	/m/0cc56	1
/m/01hkhq	/government/politician/government_positions_held./government/government_position_held/jurisdiction_of_office	/m/01y06y	0
/m/011k_j	/music/performance_role/guest_performances./music/recording_contribution/performance_role	/m/02dlh2	1
/m/0dz3r	/people/person/employment_history./business/employment_tenure/company	/m/05r4w	0
/m/03q5t	/music/performance_role/track_performances./music/track_contribution/role	/m/02fsn	1
/m/024zq	/education/field_of_study/students_majoring./education/education/student	/m/0c1sgd3	0
/m/0gh65c5	/film/film/release_date_s./film/film_regional_release_date/film_release_region	/m/03rjj	1
/m/02w9sd7	/education/field_of_study/students_majoring./education/education/major_field_of_study	/m/0gs6vr	0
/m/03k0yw	/music/artist/track_contributions./music/track_contribution/role	/m/0979zs	1
/m/06929s	/education/university/international_tuition./measurement_unit/dated_money_value/currency	/m/05kj_	0
/m/0639bg	/award/award_winning_work/awards_won./award/award_honor/award	/m/02x1z2s	1
/m/0l14j_	/government/politician/government_positions_held./government/government_position_held/basic_title	/m/01wp8w7	0
/m/026n998	/award/award_nominee/award_nominations./award/award_nomination/award_nominee	/m/08w6v_	1
/m/01s3kv	/user/jg/default_domain/olympic_games/sports	/m/01ry0f	0
/m/0584r4	/tv/tv_program/genre	/m/06nbt	1
/m/0_nh2	/film/director/film	/m/05zl0	0
/m/0ptxj	/award/award_winning_work/awards_won./award/award_honor/award	/m/0gr0m	1
/m/016h4r	/film/film_distributor/films_distributed./film/film_film_distributor_relationship/film	/m/02z1nbg	0
/m/02lnbg	/music/genre/artists	/m/03y82t6	1
/m/0ct9_	/medicine/disease/notable_people_with_this_condition	/m/018d6l	0
/m/02_j1w	/sports/sports_position/players./sports/sports_team_roster/team	/m/03lygq	1
/m/0bzlrh	/organization/organization_member/member_of./organization/organization_membership/organization	/m/03fmfs	0
/m/05kkh	/location/location/contains	/m/0n1v8	1
/m/0mx6c	/people/person/sibling_s./people/sibling_relationship/sibling	/m/031y07	0
/m/028d4v	/award/award_nominee/award_nominations./award/award_nomination/nominated_for	/m/02ht1k	1
/m/09qh1	/music/genre/artists	/m/0bqsy	0
/m/01fh0q	/music/artist/track_contributions./music/track_contribution/role	/m/01vj9c	1
/m/019g8j	/base/biblioness/bibs_location/country	/m/02py8_w	0
/m/02g0rb	/people/person/spouse_s./people/marriage/location_of_ceremony	/m/04jpl	1
/m/092c5f	/base/marchmadness/ncaa_basketball_tournament/seeds./base/marchmadness/ncaa_tournament_seed/team	/m/0hpt3	0
/m/062zm5h	/film/film/release_date_s./film/film_regional_release_date/film_release_region	/m/0345_	1
/m/02w9sd7	/award/award_category/disciplines_or_subjects	/m/01lct6	0
/m/0hfzr	/film/film/language	/m/04306rv	1
/m/02hwww	/location/administrative_division/first_level_division_of	/m/0n5by	0
/m/0hz_1	/award/award_nominee/award_nominations./award/award_nomination/nominated_for	/m/030k94	1
/m/05pt0l	/soccer/football_team/current_roster./sports/sports_team_roster/position	/m/0dbpwb	0
/m/04kny3	/soccer/football_team/current_roster./soccer/football_roster_position/position	/m/02_j1w	1
/m/019g8j	/organization/endowed_organization/endowment./measurement_unit/dated_money_value/currency	/m/03yk8z	0
/m/0bm70b	/award/award_category/winners./award/award_honor/award_winner	/m/0hskw	1
/m/0n2sh	/location/statistical_region/places_exported_to./location/imports_and_exports/exported_to	/m/032v0v	0
/m/04jpk2	/film/film/production_companies	/m/017s11	1
/m/02vjp3	/film/film/executive_produced_by	/m/01lct6	0
/m/0gtvrv3	/film/film/release_date_s./film/film_regional_release_date/film_release_region	/m/0345h	1
/m/06w38l	/organization/organization/headquarters./location/mailing_address/state_province_region	/m/08pth9	0
/m/0979zs	/music/performance_role/track_performances./music/track_contribution/role	/m/0dwt5	1
/m/0dbpwb	/music/group_member/membership./music/group_membership/group	/m/0863x_	0
/m/03pp73	/award/award_nominee/award_nominations./award/award_nomination/award	/m/0bdwqv	1
/m/019g8j	/people/person/languages	/m/019z7b	0
/m/01vsps	/award/award_nominee/award_nominations./award/award_nomination/award	/m/0gq9h	1
/m/0465_	/people/person/religion	/m/01_gv	0
/m/0fvr1	/film/film/genre	/m/01hmnh	1
/m/0gxmj	/award/hall_of_fame/inductees./award/hall_of_fame_induction/inductee	/m/025y9fn	0
/m/0gh65c5	/film/film/release_date_s./film/film_regional_release_date/film_release_region	/m/05r4w	1
/m/016dp0	/business/job_title/people_with_this_title./business/employment_tenure/company	/m/031c2r	0
/m/04l19_	/award/award_nominee/award_nominations./award/award_nomination/award	/m/02x73k6	1
/m/028d4v	/location/capital_of_administrative_division/capital_of./location/administrative_division_capital_relationship/administrative_division	/m/011j5x	0
/m/018d6l	/music/artist/contribution./music/recording_contribution/performance_role	/m/03bx0bm	1
/m/0hwqz	/government/government_office_category/officeholders./government/government_position_held/jurisdiction_of_office	/m/030_1_	0
/m/08b0cj	/sports/pro_athlete/teams./sports/sports_team_roster/team	/m/01gjlw	1
/m/0d6b7	/film/film/prequel	/m/0h1mt	0
/m/011yqc	/film/film/release_date_s./film/film_regional_release_date/film_release_region	/m/03h64	1
/m/02qsjt	/people/person/spouse_s./people/marriage/location_of_ceremony	/m/02py8_w	0
/m/01vmv_	/education/university/international_tuition./measurement_unit/dated_money_value/currency	/m/01nv4h	1
/m/04jwly	/base/biblioness/bibs_location/state	/m/07l50vn	0
/m/01m15br	/award/award_winner/awards_won./award/award_honor/award_winner	/m/02j3d4	1
/m/050ks	/medicine/symptom/symptom_of	/m/0ds460j	0
/m/02w9sd7	/award/award_category/nominees./award/award_nomination/nominated_for	/m/011yl_	1
/m/057lbk	/influence/influence_node/influenced_by	/m/0d6b7	0
/m/024n3z	/award/award_nominee/award_nominations./award/award_nomination/award_nominee	/m/01846t	1
/m/015g28	/award/award_category/winners./award/award_honor/ceremony	/m/015g28	0
/m/01c6l	/award/award_nominee/award_nominations./award/award_nomination/nominated_for	/m/0b2v79	1
/m/01tt43d	/film/film/featured_film_locations	/m/0fq27fp	0
/m/03j43	/influence/influence_node/influenced_by	/m/0mj0c	1
/m/01hqk	/soccer/football_player/current_team./sports/sports_team_roster/team	/m/067x44	0
/m/0kzy0	/people/person/profession	/m/0dz3r	1
/m/041wm	/sports/sports_league_draft/picks./sports/sports_league_draft_pick/school	/m/0flry	0
/m/0zm1	/people/person/profession	/m/0cbd2	1
/m/0yldt	/award/ranked_item/appears_in_ranked_lists./award/ranking/list	/m/01w03jv	0
/m/01_9c1	/sports/sports_position/players./sports/sports_team_roster/team	/m/06rpd	1
/m/035tlh	/sports/pro_athlete/teams./sports/sports_team_roster/team	/m/03xx3m	0
/m/012x4t	/celebrities/celebrity/celebrity_friends./celebrities/friendship/friend	/m/0grwj	1
/m/0fzrhn	/film/film/costume_design_by	/m/08h79x	0
/m/0h0jz	/award/award_nominee/award_nominations./award/award_nomination/award	/m/02w9sd7	1
/m/03h_f4	/food/food/nutrients./food/nutrition_fact/nutrient	/m/040p_q	0
/m/0htww	/film/film/release_date_s./film/film_regional_release_date/film_release_region	/m/06mkj	1
/m/056rgc	/olympics/olympic_games/sports	/m/05cgy8	0
/m/07y_7	/music/performance_role/regular_performances./music/group_membership/role	/m/03bx0bm	1
/m/09d5h	/award/award_nominated_work/award_nominations./award/award_nomination/nominated_for	/m/067x44	0
/m/083p7	/people/person/profession	/m/04gc2	1
/m/016kft	/education/university/domestic_tuition./measurement_unit/dated_money_value/currency	/m/0t_gg	0
/m/02w9sd7	/award/award_category/nominees./award/award_nomination/nominated_for	/m/0f4vx	1
/m/09lwrt	/film/film/country	/m/05r4w	0
/m/0192hw	/film/film/release_date_s./film/film_regional_release_date/film_release_region	/m/05r4w	1
/m/0d_rw	/award/award_winning_work/awards_won./award/award_honor/award	/m/091rc5	0
/m/06jw0s	/award/award_winner/awards_won./award/award_honor/award_winner	/m/01k70_	1
/m/031c2r	/location/statistical_region/religions./location/religion_percentage/religion	/m/01vrt_c	0
/m/01wdqrx	/people/person/profession	/m/04f2zj	1
/m/056878	/education/educational_institution/colors	/m/0n2sh	0
/m/06q1r	/location/statistical_region/places_exported_to./location/imports_and_exports/exported_to	/m/03rt9	1
/m/01vsps	/location/country/capital	/m/06n3y	0
/m/0g1rw	/film/film_distributor/films_distributed./film/film_film_distributor_relationship/film	/m/026zlh9	1
/m/0mwh1	/award/award_ceremony/awards_presented./award/award_honor/honored_for	/m/0f5kw7	0
/m/02mxw0	/film/actor/film./film/performance/film	/m/0b4lkx	1
/m/03bx0bm	/film/actor/film./film/performance/film	/m/05j49	0
/m/06l6nj	/people/person/profession	/m/0cbd2	1
/m/0t_gg	/people/ethnicity/languages_spoken	/m/04v68c	0
/m/02tr7d	/award/award_nominee/award_nominations./award/award_nomination/award_nominee	/m/0170s4	1
/m/09ld6g	/sports/sports_team/roster./american_football/football_historical_roster_position/position_s	/m/08h79x	0
/m/014gjp	/tv/tv_program/genre	/m/0c4xc	1
/m/0jz71	/people/ethnicity/people	/m/02vz6dn	0
/m/0kzy0	/influence/influence_node/influenced_by	/m/0gt_k	1
/m/0854hr	/tv/tv_personality/tv_regular_appearances./tv/tv_regular_personal_appearance/program	/m/0hx4y	0
/m/02tr7d	/award/award_winner/awards_won./award/award_honor/award_winner	/m/0cjsxp	1
/m/01r_t_	/education/university/international_tuition./measurement_unit/dated_money_value/currency	/m/03xx3m	0
/m/0hvgt	/soccer/football_team/current_roster./soccer/football_roster_position/position	/m/02_j1w	1
/m/01wgjj5	/location/country/capital	/m/05j49	0
/m/07s6fsf	/education/educational_degree/people_with_this_degree./education/education/institution	/m/015cz0	1
/m/09ld6g	/location/country/second_level_divisions	/m/0dprg	0
/m/02tk74	/award/award_nominee/award_nominations./award/award_nomination/award	/m/0fq9zdn	1
/m/02lfp4	/base/popstra/location/vacationers./base/popstra/vacation_choice/vacationer	/m/02kzfw	0
/m/03bx0bm	/music/performance_role/regular_performances./music/group_membership/role	/m/0j862	1
/m/037w7r	/film/film/runtime./film/film_cut/film_release_region	/m/0bzlrh	0
/m/01hqk	/film/film/music	/m/07j8kh	1
/m/0bzlrh	/base/aareas/schema/administrative_area/administrative_parent	/m/01jb8r	0
/m/015qsq	/film/film/featured_film_locations	/m/02nd_	1
/m/07s95_l	/film/film/music	/m/027z0pl	0
/m/014kkm	/award/award_winning_work/awards_won./award/award_honor/award	/m/0gr0m	1
/m/03f2_rc	/location/location/partially_contains	/m/02qvzf	0
/m/02vy5j	/people/person/spouse_s./people/marriage/spouse	/m/02g0rb	1
/m/0ct9_	/education/educational_institution/colors	/m/0l2sr	0
/m/04l19_	/film/actor/film./film/performance/film	/m/043tz0c	1
/m/011j5x	/people/deceased_person/place_of_burial	/m/03fmfs	0
/m/01z_g6	/award/award_nominee/award_nominations./award/award_nomination/award_nominee	/m/03kcyd	1
/m/04lc0h	/education/field_of_study/students_majoring./education/education/major_field_of_study	/m/0c630	0
/m/06jnvs	/award/award_nominee/award_nominations./award/award_nomination/award_nominee	/m/0bczgm	1
/m/05wvs	/sports/sports_team_location/teams	/m/02vm9nd	0
/m/0bg539	/award/award_nominee/award_nominations./award/award_nomination/award	/m/0cjyzs	1
/m/03fwln	/education/educational_degree/people_with_this_degree./education/education/institution	/m/0dprg	0
/m/01lj_c	/award/award_category/winners./award/award_honor/ceremony	/m/0ds460j	1
/m/01vw_dv	/film/film_distributor/films_distributed./film/film_film_distributor_relationship/film	/m/026mj	0
/m/07c0j	/award/award_nominee/award_nominations./award/award_nomination/award	/m/03qbnj	1
/m/0bt7w	/film/film/language	/m/058z1hb	0
/m/02_j1w	/sports/sports_position/players./sports/sports_team_roster/team	/m/09xb4h	1
/m/0f6lx	/education/educational_institution/students_graduates./education/education/student	/m/017f3m	0
/m/01v9l67	/award/award_nominee/award_nominations./award/award_nomination/nominated_for	/m/017gm7	1
/m/0863x_	/medicine/disease/notable_people_with_this_condition	/m/01vvzb1	0
/m/03sbs	/user/alexander/philosophy/philosopher/interests	/m/04s0m	1
/m/05kj_	/sports/pro_athlete/teams./sports/sports_team_roster/team	/m/02vm9nd	0
/m/017vkx	/people/person/profession	/m/09jwl	1
/m/030cx	/sports/sports_team/colors	/m/03fts	0
/m/03n69x	/sports/pro_athlete/teams./sports/sports_team_roster/team	/m/0cqt41	1
/m/0l14j_	/award/award_category/disciplines_or_subjects	/m/04lc0h	0
/m/043vc	/sports/sports_team/roster./american_football/football_historical_roster_position/position_s	/m/02g_6j	1
/m/03rt9	/base/aareas/schema/administrative_area/capital	/m/0cvw9	0
/m/02x4w6g	/award/award_category/winners./award/award_honor/award_winner	/m/026r8q	1
/m/03f2_rc	/location/statistical_region/gdp_nominal_per_capita./measurement_unit/dated_money_value/currency	/m/01cgz	0
/m/0275_pj	/award/award_nominee/award_nominations./award/award_nomination/award_nominee	/m/070w7s	1
/m/0gq9h	/base/popstra/celebrity/dated./base/popstra/dated/participant	/m/03k0yw	0
/m/017s11	/film/film_distributor/films_distributed./film/film_film_distributor_relationship/film	/m/04cv9m	1
/m/0d2by	/base/popstra/location/vacationers./base/popstra/vacation_choice/vacationer	/m/0ds460j	0
/m/031y07	/award/award_nominee/award_nominations./award/award_nomination/nominated_for	/m/02bg8v	1
/m/0345_	/tv/tv_program/regular_cast./tv/regular_tv_appearance/actor	/m/02qvzf	0
/m/0c6g1l	/award/award_nominee/award_nominations./award/award_nomination/award_nominee	/m/024n3z	1
/m/06nz46	/film/film/release_date_s./film/film_regional_release_date/film_release_region	/m/02jxrw	0
/m/026t6	/music/performance_role/track_performances./music/track_contribution/role	/m/01bns_	1
/m/02vxyl5	/film/film/edited_by	/m/03f2_rc	0
/m/0bl3nn	/film/film/genre	/m/01hmnh	1
/m/01vvzb1	/food/food/nutrients./food/nutrition_fact/nutrient	/m/0sngf	0
/m/05yjhm	/people/person/places_lived./people/place_lived/location	/m/013h9	1
/m/0flw6	/film/film/production_companies	/m/0_nh2	0
/m/04lhc4	/award/award_nominated_work/award_nominations./award/award_nomination/nominated_for	/m/09cr8	1
/m/06y611	/tv/tv_network/programs./tv/tv_network_duration/program	/m/02lfp4	0
/m/03ym1	/film/actor/film./film/performance/film	/m/01qb5d	1
/m/01qx13	/award/award_nominee/award_nominations./award/award_nomination/award	/m/01y998	0
/m/075mb	/base/aareas/schema/administrative_area/administrative_parent	/m/05sb1	1
/m/07zqy	/location/capital_of_administrative_division/capital_of./location/administrative_division_capital_relationship/administrative_division	/m/02_cq0	0
/m/0vhm	/tv/tv_program/program_creator	/m/09b0xs	1
/m/0fq27fp	/base/popstra/celebrity/dated./base/popstra/dated/participant	/m/0gqy2	0
/m/035zr0	/film/film/music	/m/0l12d	1
/m/0lcx	/tv/non_character_role/tv_regular_personal_appearances./tv/tv_regular_personal_appearance/person	/m/01_gv	0
/m/0jpn8	/education/university/fraternities_and_sororities	/m/035tlh	1
/m/01s3kv	/sports/sports_team/colors	/m/018d6l	0
/m/011j5x	/music/genre/artists	/m/014pg1	1
/m/0n6bs	/people/person/nationality	/m/0flry	0
/m/0bjrnt	/education/educational_degree/people_with_this_degree./education/education/institution	/m/08815	1
/m/01vsps	/people/cause_of_death/people	/m/03f2_rc	0
/m/07s95_l	/award/award_winner/awards_won./award/award_honor/award_winner	/m/04kr63w	1
/m/04mhl	/government/government_office_category/officeholders./government/government_position_held/jurisdiction_of_office	/m/0bzlrh	0
/m/01xllf	/film/actor/film./film/performance/film	/m/0ds5_72	1
/m/04cv9m	/base/culturalevent/event/entity_involved	/m/0q_xk	0
/m/03yk8z	/award/award_nominee/award_nominations./award/award_nomination/nominated_for	/m/09gq0x5	1
/m/016kft	/music/instrument/instrumentalists	/m/056878	0
/m/026t6	/music/instrument/instrumentalists	/m/01wp8w7	1
/m/030_1_	/music/artist/contribution./music/recording_contribution/performance_role	/m/02b185	0
/m/015l4k	/user/jg/default_domain/olympic_games/sports	/m/06zgc	1
/m/0h0jz	/film/film/dubbing_performances./film/dubbing_performance/actor	/m/03fwln	0
/m/0ds1glg	/film/film/release_date_s./film/film_regional_release_date/film_release_region	/m/03rt9	1
/m/02m30v	/people/person/religion	/m/05yjhm	0
/m/02fv3t	/award/award_category/winners./award/award_honor/ceremony	/m/056878	1
/m/0dz3r	/award/award_nominee/award_nominations./award/award_nomination/award	/m/024zq	0
/m/03mkk4	/education/educational_degree/people_with_this_degree./education/education/major_field_of_study	/m/05qdh	1
/m/02lfp4	/education/field_of_study/students_majoring./education/education/major_field_of_study	/m/0dtw1x	0
/m/0fq27fp	/film/film/release_date_s./film/film_regional_release_date/film_release_region	/m/0345h	1
/m/01fd26	/film/film/cinematography	/m/01r_t_	0
/m/04jwly	/award/award_winning_work/awards_won./award/award_honor/award_winner	/m/02d4ct	1
/m/0gfw56	/influence/influence_node/influenced_by	/m/03rt9	0
/m/0glt670	/music/genre/artists	/m/0bqsy	1
/m/02m3sd	/base/biblioness/bibs_location/state	/m/09ld6g	0
/m/04rsd2	/award/award_nominee/award_nominations./award/award_nomination/award_nominee	/m/0159h6	1
/m/02w9sd7	/location/administrative_division/country	/m/06zgc	0
/m/0lkr7	/award/award_nominee/award_nominations./award/award_nomination/award	/m/0gqy2	1
/m/01dbk6	/government/political_party/politicians_in_this_party./government/political_party_tenure/politician	/m/01c9jp	0
/m/03bx0bm	/music/performance_role/regular_performances./music/group_membership/role	/m/02fsn	1
/m/01lct6	/media_common/netflix_genre/titles	/m/04rsd2	0
/m/02j3d4	/award/award_winner/awards_won./award/award_honor/award_winner	/m/02cx90	1
/m/0dt_q_	/education/university/international_tuition./measurement_unit/dated_money_value/currency	/m/0c4f4	0
/m/0dwt5	/music/performance_role/track_performances./music/track_contribution/role	/m/01vj9c	1
/m/0dzs0	/base/americancomedy/celebrity_impressionist/celebrities_impersonated	/m/02b1gz	0
/m/02g_6j	/sports/sports_position/players./sports/sports_team_roster/team	/m/0ws7	1
/m/01w56k	/people/cause_of_death/people	/m/043vc	0
/m/06vsbt	/people/person/places_lived./people/place_lived/location	/m/0fpzwf	1
/m/05dss7	/medicine/disease/notable_people_with_this_condition	/m/0n6bs	0
/m/01dy7j	/award/award_nominee/award_nominations./award/award_nomination/nominated_for	/m/0d68qy	1
/m/02d4ct	/tv/non_character_role/tv_regular_personal_appearances./tv/tv_regular_personal_appearance/person	/m/01_f_5	0
/m/0cjsxp	/award/award_nominee/award_nominations./award/award_nomination/award	/m/02x4w6g	1
/m/07z6xs	/government/political_party/politicians_in_this_party./government/political_party_tenure/politician	/m/01_f_5	0
/m/03sbs	/user/alexander/philosophy/philosopher/interests	/m/0x0w	1
/m/04_bfq	/education/university/fraternities_and_sororities	/m/02d4ct	0
/m/06hzsx	/people/person/profession	/m/0dgd_	1
/m/02m30v	/sports/professional_sports_team/draft_picks./sports/sports_league_draft_pick/draft	/m/0517bc	0
/m/032j_n	/film/film_distributor/films_distributed./film/film_film_distributor_relationship/film	/m/0bwhdbl	1
/m/01tdpv	/base/aareas/schema/administrative_area/administrative_parent	/m/06929s	0
/m/02pt6k_	/award/award_winner/awards_won./award/award_honor/award_winner	/m/02qssrm	1
/m/01y06y	/people/cause_of_death/people	/m/0124ld	0
/m/05kjc6	/soccer/football_team/current_roster./soccer/football_roster_position/position	/m/02_j1w	1
/m/0gqy2	/people/ethnicity/geographic_distribution	/m/0gbfn9	0
/m/05ns4g	/soccer/football_team/current_roster./soccer/football_roster_position/position	/m/02_j1w	1
/m/0j862	/organization/organization/place_founded	/m/04h6m	0
/m/03bwzr4	/education/educational_degree/people_with_this_degree./education/education/institution	/m/015cz0	1
/m/0584r4	/base/aareas/schema/administrative_area/capital	/m/02pt6k_	0
/m/029h7y	/music/genre/artists	/m/01vt5c_	1
/m/01j59b0	/base/popstra/celebrity/breakup./base/popstra/breakup/participant	/m/03jht	0
/m/02x73k6	/award/award_category/nominees./award/award_nomination/nominated_for	/m/01chpn	1
/m/01w8sf	/tv/tv_program/program_creator	/m/02gnh0	0
/m/011zf2	/award/award_winner/awards_won./award/award_honor/award_winner	/m/01m15br	1
/m/02py8_w	/media_common/netflix_genre/titles	/m/01lct6	0
/m/02_j1w	/sports/sports_position/players./sports/sports_team_roster/team	/m/0gfw56	1
/m/0jpn8	/film/film/personal_appearances./film/personal_film_appearance/person	/m/0dz3r	0
/m/02g3gw	/award/award_category/nominees./award/award_nomination/nominated_for	/m/01hv3t	1
/m/014_x2	/location/hud_county_place/county	/m/050ks	0
/m/026t6	/music/instrument/instrumentalists	/m/06cc_1	1
/m/017f3m	/people/person/places_lived./people/place_lived/location	/m/01dy7j	0
/m/026t6	/music/performance_role/guest_performances./music/recording_contribution/performance_role	/m/02dlh2	1
/m/01vvzb1	/award/award_winning_work/awards_won./award/award_honor/award	/m/0f6lx	0
/m/0h95927	/film/film/release_date_s./film/film_regional_release_date/film_release_region	/m/03gj2	1
/m/01hqk	/people/person/place_of_birth	/m/0bt7w	0
/m/0gq9h	/award/award_category/nominees./award/award_nomination/nominated_for	/m/0cq7kw	1
/m/08htt0	/government/government_office_category/officeholders./government/government_position_held/jurisdiction_of_office	/m/04wvhz	0
/m/04969y	/award/award_winning_work/awards_won./award/award_honor/award	/m/03y8cbv	1
/m/033cnk	/people/profession/specialization_of	/m/011yl_	0
/m/05nwr	/location/administrative_division/first_level_division_of	/m/06q1r	1
/m/08h79x	/film/film/film_production_design_by	/m/058z1hb	0
/m/0jgwf	/award/award_nominee/award_nominations./award/award_nomination/nominated_for	/m/0glbqt	1
/m/0dt_q_	/award/award_ceremony/awards_presented./award/award_honor/award_winner	/m/01dbk6	0
/m/09fb5	/people/person/places_lived./people/place_lived/location	/m/0cc56	1
/m/02bp37	/people/ethnicity/languages_spoken	/m/01vvzb1	0
/m/024fz9	/award/award_category/winners./award/award_honor/award_winner	/m/03h_fk5	1
/m/041wm	/education/educational_institution/colors	/m/04m064	0
/m/0164qt	/film/film/music	/m/02g1jh	1
/m/0flry	/award/award_ceremony/awards_presented./award/award_honor/award_winner	/m/043vc	0
/m/02_j1w	/sports/sports_position/players./sports/sports_team_roster/team	/m/01352_	1
/m/0t_gg	/award/hall_of_fame/inductees./award/hall_of_fame_induction/inductee	/m/01hqk	0
/m/0gtvrv3	/film/film/release_date_s./film/film_regional_release_date/film_release_region	/m/03rjj	1
/m/01xllf	/education/university/local_tuition./measurement_unit/dated_money_value/currency	/m/0d_rw	0
/m/02dlh2	/music/instrument/family	/m/026t6	1
/m/01dbk6	/education/university/international_tuition./measurement_unit/dated_money_value/currency	/m/05j49	0
/m/06cgf	/award/ranked_item/appears_in_ranked_lists./award/ranking/list	/m/05glt	1
/m/02nt75	/influence/influence_node/influenced_by	/m/06gd4	0
/m/0557yqh	/tv/tv_program/genre	/m/0c4xc	1
/m/014_x2	/education/educational_institution/students_graduates./education/education/major_field_of_study	/m/07qy0b	0
/m/02vxn	/education/field_of_study/students_majoring./education/education/major_field_of_study	/m/02822	1
/m/02d4ct	/organization/organization/place_founded	/m/0jgwf	0
/m/0cmc2	/base/culturalevent/event/entity_involved	/m/01fmy9	1
/m/0345_	/education/educational_degree/people_with_this_degree./education/education/student	/m/047dpm0	0
/m/03z9585	/film/film/release_date_s./film/film_regional_release_date/film_release_region	/m/06mkj	1
/m/0127s7	/organization/role/leaders./organization/leadership/organization	/m/0k_s5	0
/m/0k7tq	/film/film/release_date_s./film/film_regional_release_date/film_release_region	/m/056_y	1
/m/0d1mp3	/influence/influence_node/peers./influence/peer_relationship/peers	/m/07f8wg	0
/m/057bc6m	/award/award_winner/awards_won./award/award_honor/award_winner	/m/076psv	1
/m/01r3hr	/film/film/music	/m/02m30v	0
/m/02cx90	/award/award_winner/awards_won./award/award_honor/award_winner	/m/02j3d4	1
/m/03bxp5	/base/aareas/schema/administrative_area/capital	/m/04v68c	0
/m/02_j1w	/sports/sports_position/players./sports/sports_team_roster/team	/m/051qvn	1
/m/05d49	/film/film/runtime./film/film_cut/film_release_region	/m/01j59b0	0
/m/023wyl	/sports/sports_position/players./sports/sports_team_roster/team	/m/07kbp5	1
/m/0cd25	/people/person/nationality	/m/0356gk	0
/m/03bwzr4	/education/educational_degree/people_with_this_degree./education/education/institution	/m/0gjv_	1
/m/0_nh2	/people/person/religion	/m/032v0v	0
/m/03bwzr4	/education/educational_degree/people_with_this_degree./education/education/institution	/m/03ksy	1
/m/0d2by	/medicine/disease/risk_factors	/m/063k3h	0
/m/0192hw	/film/film/featured_film_locations	/m/0qpn9	1
/m/0flry	/user/alexander/philosophy/philosopher/interests	/m/063k3h	0
/m/0275_pj	/award/award_winner/awards_won./award/award_honor/award_winner	/m/070w7s	1
/m/01w56k	/award/award_winning_work/awards_won./award/award_honor/award	/m/02m30v	0
/m/01r216	/award/award_nominee/award_nominations./award/award_nomination/award_nominee	/m/02j8nx	1
/m/02pt6k_	/olympics/olympic_sport/athletes./olympics/olympic_athlete_affiliation/country	/m/056rgc	0
/m/09byk	/people/person/languages	/m/04306rv	1
/m/0bynt	/dataworld/gardening_hint/split_to	/m/026mj	0
/m/0mwxz	/location/location/adjoin_s./location/adjoining_relationship/adjoins	/m/0mwh1	1
/m/017gm7	/award/award_ceremony/awards_presented./award/award_honor/honored_for	/m/0dzs0	0
/m/018x3	/award/award_nominee/award_nominations./award/award_nomination/award_nominee	/m/01wyq0w	1
/m/0ptxj	/sports/sports_league_draft/picks./sports/sports_league_draft_pick/school	/m/0bjrnt	0
/m/0gr0m	/award/award_category/nominees./award/award_nomination/nominated_for	/m/07z6xs	1
/m/02ht1k	/people/person/languages	/m/03p85	0
/m/017s11	/award/award_nominee/award_nominations./award/award_nomination/nominated_for	/m/0dc7hc	1
/m/03bxp5	/film/film_set_designer/film_sets_designed	/m/0b2lw	0
/m/05pxnmb	/award/award_winning_work/awards_won./award/award_honor/honored_for	/m/0bxxzb	1
/m/0584r4	/location/administrative_division/first_level_division_of	/m/0mwh1	0
/m/01vrt_c	/base/popstra/celebrity/dated./base/popstra/dated/participant	/m/0127s7	1
/m/0fm6m8	/award/award_winning_work/awards_won./award/award_honor/award_winner	/m/0d_rw	0
/m/0ptxj	/film/film/produced_by	/m/03s2y9	1
/m/0c7ct	/location/location/adjoin_s./location/adjoining_relationship/adjoins	/m/05bmq	0
/m/0gj8nq2	/film/film/release_date_s./film/film_regional_release_date/film_release_region	/m/03rjj	1
/m/0c7ct	/film/film_subject/films	/m/027r7k	0
/m/0dd6bf	/film/film/language	/m/03_9r	1
/m/0cvw9	/sports/sports_position/players./sports/sports_team_roster/team	/m/0t_71	0
/m/026t6	/music/performance_role/track_performances./music/track_contribution/role	/m/0979zs	1
/m/0dt_q_	/base/popstra/celebrity/canoodled./base/popstra/canoodled/participant	/m/02cgp8	0
/m/016yvw	/people/person/nationality	/m/03rt9	1
/m/027bs_2	/people/person/places_lived./people/place_lived/location	/m/03xx3m	0
/m/03mszl	/music/artist/contribution./music/recording_contribution/performance_role	/m/026t6	1
/m/030cx	/music/instrument/instrumentalists	/m/02m3sd	0
/m/01_f_5	/award/award_nominee/award_nominations./award/award_nomination/award	/m/02x1dht	1
/m/03h_f4	/soccer/football_player/current_team./sports/sports_team_roster/team	/m/06j8q_	0
/m/034np8	/film/actor/film./film/performance/film	/m/0f40w	1
/m/0n2sh	/film/film/music	/m/04jpl	0
/m/01vw_dv	/people/person/profession	/m/0dz3r	1
/m/02p3my	/film/film/estimated_budget./measurement_unit/dated_money_value/currency	/m/06gd4	0
/m/08vq2y	/soccer/football_team/current_roster./soccer/football_roster_position/position	/m/02_j1w	1
/m/0l8g0	/film/director/film	/m/07vyf	0
/m/05dbf	/base/popstra/celebrity/dated./base/popstra/dated/participant	/m/0lx2l	1
/m/02gnh0	/education/educational_degree/people_with_this_degree./education/education/institution	/m/04bdzg	0
/m/04mhl	/people/person/profession	/m/0cbd2	1
/m/01grpq	/education/educational_institution/colors	/m/0f5xn	0
/m/03mkk4	/education/educational_degree/people_with_this_degree./education/education/major_field_of_study	/m/040p_q	1
/m/0h1mt	/education/educational_degree/people_with_this_degree./education/education/major_field_of_study	/m/05dbf	0
/m/011yl_	/film/film/featured_film_locations	/m/04jpl	1
/m/0j862	/people/ethnicity/people	/m/01y06y	0
/m/01gtcq	/government/legislative_session/members./government/government_position_held/district_represented	/m/026mj	1
/m/0q_xk	/film/film/executive_produced_by	/m/01yk13	0
/m/03fmfs	/education/educational_institution/colors	/m/01g5v	1
/m/017f3m	/award/award_winning_work/awards_won./award/award_honor/award_winner	/m/0bt7w	0
/m/0345h	/location/location/contains	/m/07gdw	1
/m/0ds460j	/people/ethnicity/languages_spoken	/m/02z1nbg	0
/m/07s95_l	/award/award_nominee/award_nominations./award/award_nomination/award_nominee	/m/04kr63w	1
/m/04b5l3	/base/marchmadness/ncaa_basketball_tournament/seeds./base/marchmadness/ncaa_tournament_seed/team	/m/0m4yg	0
/m/0j_sncb	/education/educational_institution/students_graduates./education/education/major_field_of_study	/m/0fdys	1
/m/01j59b0	/award/award_nominee/award_nominations./award/award_nomination/award_nominee	/m/01w56k	0
/m/014gjp	/award/award_winning_work/awards_won./award/award_honor/award_winner	/m/09d5h	1
/m/04v68c	/location/country/capital	/m/02l840	0
/m/050ks	/location/statistical_region/religions./location/religion_percentage/religion	/m/072w0	1
/m/03_wm6	/people/deceased_person/place_of_death	/m/0dprg	0
/m/0bcp9b	/film/film/music	/m/01l3mk3	1
/m/06b19	/tv/tv_producer/programs_produced./tv/tv_producer_term/program	/m/019z7b	0
/m/056rgc	/award/award_nominee/award_nominations./award/award_nomination/award	/m/02x4w6g	1
/m/016h4r	/film/film/runtime./film/film_cut/film_release_region	/m/04xhwn	0
/m/0c1d0	/location/capital_of_administrative_division/capital_of./location/administrative_division_capital_relationship/administrative_division	/m/0mw5x	1
/m/01s3kv	/film/film/country	/m/02x8s9	0
/m/02xb2bt	/people/person/nationality	/m/03rt9	1
/m/04_bfq	/people/profession/specialization_of	/m/0d1mp3	0
/m/04j_h4	/music/genre/parent_genre	/m/0glt670	1
/m/0l14j_	/location/administrative_division/first_level_division_of	/m/0h407	0
/m/0159h6	/award/award_nominee/award_nominations./award/award_nomination/nominated_for	/m/02py4c8	1
/m/03n5v	/sports/sports_team/roster./american_football/football_historical_roster_position/position_s	/m/0_nh2	0
/m/0glt670	/music/genre/artists	/m/01vw_dv	1
/m/09nhvw	/education/university/local_tuition./measurement_unit/dated_money_value/currency	/m/01x4r3	0
/m/017s11	/award/award_nominee/award_nominations./award/award_nomination/nominated_for	/m/0bxxzb	1
/m/03fmfs	/base/americancomedy/celebrity_impressionist/celebrities_impersonated	/m/01r3hr	0
/m/0fq9zdn	/award/award_category/winners./award/award_honor/award_winner	/m/02d42t	1
/m/0207wx	/music/instrument/instrumentalists	/m/04jpk2	0
/m/01vksx	/film/film/release_date_s./film/film_regional_release_date/film_release_region	/m/06mkj	1
/m/07vfz	/tv/tv_writer/tv_programs./tv/tv_program_writer_relationship/tv_program	/m/01y998	0
/m/019f4v	/award/award_category/nominees./award/award_nomination/nominated_for	/m/09p3_s	1
/m/0q_xk	/music/instrument/instrumentalists	/m/0dl9_4	0
/m/017s11	/award/award_nominee/award_nominations./award/award_nomination/nominated_for	/m/02hxhz	1
/m/0d1mp3	/base/culturalevent/event/entity_involved	/m/076psv	0
/m/07c0j	/award/award_nominee/award_nominations./award/award_nomination/award	/m/01c9jp	1
/m/01w56k	/soccer/football_team/current_roster./soccer/football_roster_position/position	/m/08htt0	0
/m/06q1r	/location/statistical_region/places_exported_to./location/imports_and_exports/exported_to	/m/03rjj	1
/m/058z1hb	/film/film/release_date_s./film/film_regional_release_date/film_regional_debut_venue	/m/0bqsy	0
/m/07h1q	/influence/influence_node/influenced_by	/m/04xm_	1
/m/02nfhx	/medicine/disease/risk_factors	/m/019g8j	0
/m/0grwj	/people/person/profession	/m/0cbd2	1
/m/0d2by	/film/film/edited_by	/m/01g6bk	0
/m/02vkvcz	/people/deceased_person/place_of_death	/m/04jpl	1
/m/0b_71r	/government/politician/government_positions_held./government/government_position_held/basic_title	/m/0mwh1	0
/m/0gq_v	/award/award_category/winners./award/award_honor/ceremony	/m/0bzmt8	1
/m/03k0yw	/location/capital_of_administrative_division/capital_of./location/administrative_division_capital_relationship/administrative_division	/m/0n5by	0
/m/0d500h	/award/award_nominee/award_nominations./award/award_nomination/nominated_for	/m/04jwly	1
/m/0207wx	/base/schemastaging/organization_extra/phone_number./base/schemastaging/phone_sandbox/service_location	/m/02kzfw	0
/m/03_wtr	/award/award_winner/awards_won./award/award_honor/award_winner	/m/03_wvl	1
/m/06q07	/olympics/olympic_participating_country/athletes./olympics/olympic_athlete_affiliation/olympics	/m/0f5xn	0
/m/07nf6	/location/location/adjoin_s./location/adjoining_relationship/adjoins	/m/09krp	1
/m/0t_2	/time/event/locations	/m/05bmq	0
/m/0ct2tf5	/film/film/other_crew./film/film_crew_gig/film_crew_role	/m/02_n3z	1
/m/04m064	/tv/tv_network/programs./tv/tv_network_duration/program	/m/0dprg	0
/m/05hyn5	/soccer/football_team/current_roster./soccer/football_roster_position/position	/m/02_j1w	1
/m/0418154	/olympics/olympic_participating_country/athletes./olympics/olympic_athlete_affiliation/olympics	/m/0fltx	0
/m/0nk72	/user/alexander/philosophy/philosopher/interests	/m/04s0m	1
/m/057lbk	/base/popstra/celebrity/friendship./base/popstra/friendship/participant	/m/06b19	0
/m/08815	/education/educational_institution/students_graduates./education/education/major_field_of_study	/m/01zc2w	1
/m/08w6v_	/base/popstra/celebrity/breakup./base/popstra/breakup/participant	/m/02vxn	0
/m/015pxr	/award/award_winner/awards_won./award/award_honor/award_winner	/m/0bczgm	1
/m/01j7pt	/film/film/other_crew./film/film_crew_gig/film_crew_role	/m/04jlgp	0
/m/04wvhz	/award/award_nominee/award_nominations./award/award_nomination/award_nominee	/m/07lwsz	1
/m/06rrzn	/music/artist/origin	/m/01y06y	0
/m/0dx8gj	/film/film/genre	/m/082gq	1
/m/03_wm6	/music/instrument/instrumentalists	/m/0n2sh	0
/m/0cjyzs	/award/award_category/nominees./award/award_nomination/nominated_for	/m/014gjp	1
/m/09nhvw	/base/marchmadness/ncaa_basketball_tournament/seeds./base/marchmadness/ncaa_tournament_seed/team	/m/031c2r	0
/m/034487	/music/genre/artists	/m/01k_yf	1
/m/03p85	/film/film/written_by	/m/07z6xs	0
/m/02rb607	/film/film/country	/m/0345h	1
/m/099d4	/medicine/symptom/symptom_of	/m/07nf6	0
/m/0cjsxp	/award/award_winner/awards_won./award/award_honor/award_winner	/m/02tr7d	1
/m/03n5v	/award/ranked_item/appears_in_ranked_lists./award/ranking/list	/m/02ddq4	0
/m/06mkj	/olympics/olympic_participating_country/athletes./olympics/olympic_athlete_affiliation/olympics	/m/0kbvv	1
/m/014_x2	/award/award_nominee/award_nominations./award/award_nomination/award	/m/0275_pj	0
