# Supplementary material
Source: ML conference proceedings conference paper supplement (https://proceedings.neurips.cc/paper_files/paper/2021/hash/0fd600c953cde8121262e322ef09f70e-Abstract.html)
Supplement: Supplementary file 1 [file 0fd600c953cde8121262e322ef09f70e-Supplemental.zip › Supplementary_Material_Paper_8745/data/GraIL-BM_fb237_v2/test/test-random-sample/test9.txt]

/m/021_rm	/award/award_winner/awards_won./award/award_honor/award_winner	/m/02p_ycc	1
/m/05p1tzf	/military/military_conflict/combatants./military/military_combatant_group/combatants	/m/09ld6g	0
/m/02rb84n	/film/film/production_companies	/m/030_1_	1
/m/01wp8w7	/music/performance_role/guest_performances./music/recording_contribution/performance_role	/m/07j9n	0
/m/02lnbg	/music/genre/artists	/m/0bqsy	1
/m/02xlf	/medicine/disease/notable_people_with_this_condition	/m/05c5xx9	0
/m/01n3bm	/people/cause_of_death/people	/m/031y07	1
/m/02hmvc	/language/human_language/countries_spoken_in	/m/0fm6m8	0
/m/0gr0m	/award/award_category/nominees./award/award_nomination/nominated_for	/m/0bcp9b	1
/m/08pc1x	/medicine/symptom/symptom_of	/m/0vm5t	0
/m/01zwy	/people/person/places_lived./people/place_lived/location	/m/03v_5	1
/m/03c3jzx	/film/film/cinematography	/m/057lbk	0
/m/02cq61	/education/educational_degree/people_with_this_degree./education/education/institution	/m/07szy	1
/m/0q_xk	/influence/influence_node/peers./influence/peer_relationship/peers	/m/0hpt3	0
/m/01sb5r	/people/person/profession	/m/09jwl	1
/m/03k3b	/music/artist/track_contributions./music/track_contribution/role	/m/043z0	0
/m/0272vm	/soccer/football_team/current_roster./soccer/football_roster_position/position	/m/02_j1w	1
/m/014kbl	/people/ethnicity/languages_spoken	/m/0584r4	0
/m/016xh5	/people/person/spouse_s./people/marriage/spouse	/m/01pnn3	1
/m/011zf2	/award/hall_of_fame/inductees./award/hall_of_fame_induction/inductee	/m/0mx6c	0
/m/0jtg0	/music/performance_role/regular_performances./music/group_membership/role	/m/01vj9c	1
/m/04rsd2	/base/schemastaging/organization_extra/phone_number./base/schemastaging/phone_sandbox/service_language	/m/0154fs	0
/m/0c921	/award/award_winner/awards_won./award/award_honor/award_winner	/m/06l6nj	1
/m/012ky3	/government/legislative_session/members./government/government_position_held/legislative_sessions	/m/0ds1glg	0
/m/02cx90	/people/person/profession	/m/09jwl	1
/m/01v40wd	/dataworld/gardening_hint/split_to	/m/024fz9	0
/m/035yn8	/film/film/release_date_s./film/film_regional_release_date/film_release_region	/m/03h64	1
/m/015mlw	/base/aareas/schema/administrative_area/administrative_parent	/m/02qsqmq	0
/m/0c11mj	/soccer/football_player/current_team./sports/sports_team_roster/team	/m/05511w	1
/m/02jkkv	/award/award_category/winners./award/award_honor/award_winner	/m/0gqfy	0
/m/056878	/award/award_ceremony/awards_presented./award/award_honor/award_winner	/m/02l840	1
/m/0164qt	/tv/tv_personality/tv_regular_appearances./tv/tv_regular_personal_appearance/program	/m/07sqbl	0
/m/02822	/education/field_of_study/students_majoring./education/education/student	/m/0c3p7	1
/m/06rrzn	/film/film/runtime./film/film_cut/film_release_region	/m/0fr5p	0
/m/02vz6dn	/film/film/release_date_s./film/film_regional_release_date/film_release_region	/m/03rjj	1
/m/0bt7w	/award/hall_of_fame/inductees./award/hall_of_fame_induction/inductee	/m/0584r4	0
/m/0lkr7	/film/actor/film./film/performance/film	/m/024mpp	1
/m/031296	/government/government_office_category/officeholders./government/government_position_held/jurisdiction_of_office	/m/018x3	0
/m/03qbnj	/award/award_category/winners./award/award_honor/award_winner	/m/01wdqrx	1
/m/022fdt	/user/jg/default_domain/olympic_games/sports	/m/03g9xj	0
/m/01gqfm	/olympics/olympic_sport/athletes./olympics/olympic_athlete_affiliation/country	/m/05r4w	1
/m/0172jm	/education/university/local_tuition./measurement_unit/dated_money_value/currency	/m/02f8lw	0
/m/0170s4	/base/popstra/celebrity/dated./base/popstra/dated/participant	/m/0c3p7	1
/m/07s6tbm	/olympics/olympic_sport/athletes./olympics/olympic_athlete_affiliation/country	/m/0pf2	0
/m/02j3d4	/award/award_winner/awards_won./award/award_honor/award_winner	/m/011zf2	1
/m/02qssrm	/music/genre/artists	/m/01mxt_	0
/m/0f4m2z	/film/film/release_date_s./film/film_regional_release_date/film_release_region	/m/06mkj	1
/m/05jf85	/music/artist/contribution./music/recording_contribution/performance_role	/m/0d2by	0
/m/0k4f3	/film/film/produced_by	/m/0c921	1
/m/04cv9m	/user/alexander/philosophy/philosopher/interests	/m/04cv9m	0
/m/02v0ff	/people/person/profession	/m/0cbd2	1
/m/01wdqrx	/people/person/spouse_s./people/marriage/spouse	/m/06929s	0
/m/02_j1w	/sports/sports_position/players./sports/sports_team_roster/team	/m/03h0k1	1
/m/09gkdln	/user/jg/default_domain/olympic_games/sports	/m/026zlh9	0
/m/02lfp4	/award/award_nominee/award_nominations./award/award_nomination/award_nominee	/m/01pbwwl	1
/m/083p7	/education/field_of_study/students_majoring./education/education/student	/m/0gqfy	0
/m/0gbfn9	/film/film/release_date_s./film/film_regional_release_date/film_release_region	/m/05r4w	1
/m/08b0cj	/sports/sports_position/players./sports/sports_team_roster/team	/m/01vsps	0
/m/048cl	/people/person/nationality	/m/0345h	1
/m/06y611	/olympics/olympic_games/sports	/m/02gnh0	0
/m/02vjp3	/film/film/country	/m/03rjj	1
/m/09p4w8	/award/award_nominee/award_nominations./award/award_nomination/award	/m/022fdt	0
/m/02pt6k_	/people/person/place_of_birth	/m/06wxw	1
/m/05bmq	/film/film/release_date_s./film/film_regional_release_date/film_regional_debut_venue	/m/06929s	0
/m/033tf_	/people/ethnicity/people	/m/04xhwn	1
/m/03_wtr	/film/film/dubbing_performances./film/dubbing_performance/actor	/m/0c7ct	0
/m/03_wvl	/award/award_winner/awards_won./award/award_honor/award_winner	/m/03_wtr	1
/m/01f7v_	/people/profession/specialization_of	/m/011xy1	0
/m/03c7ln	/music/group_member/membership./music/group_membership/group	/m/0khth	1
/m/02vm9nd	/base/schemastaging/organization_extra/phone_number./base/schemastaging/phone_sandbox/service_location	/m/06929s	0
/m/013q07	/film/film/language	/m/03_9r	1
/m/0bqsy	/sports/professional_sports_team/draft_picks./sports/sports_league_draft_pick/school	/m/02lbrd	0
/m/0fdys	/education/field_of_study/students_majoring./education/education/student	/m/0n6f8	1
/m/04sv4	/base/schemastaging/organization_extra/phone_number./base/schemastaging/phone_sandbox/service_location	/m/0ds2n	0
/m/02lnbg	/music/genre/artists	/m/01vtj38	1
/m/067zx9	/education/university/international_tuition./measurement_unit/dated_money_value/currency	/m/01c9jp	0
/m/0208wk	/award/award_category/disciplines_or_subjects	/m/02xlf	1
/m/02tr7d	/people/ethnicity/people	/m/05c5xx9	0
/m/0qpjt	/location/hud_county_place/county	/m/0m27n	1
/m/016dp0	/base/biblioness/bibs_location/country	/m/01w56k	0
/m/03qmx_f	/people/person/nationality	/m/06q1r	1
/m/0ktx_	/music/instrument/family	/m/03fts	0
/m/01vj9c	/music/performance_role/regular_performances./music/group_membership/group	/m/079kr	1
/m/07gdw	/people/person/religion	/m/0237fw	0
/m/015l4k	/olympics/olympic_games/sports	/m/09_94	1
/m/06zgc	/film/film/written_by	/m/0j862	0
/m/046m59	/award/award_nominee/award_nominations./award/award_nomination/award_nominee	/m/016kft	1
/m/01_k71	/influence/influence_node/influenced_by	/m/01dbk6	0
/m/0nk72	/influence/influence_node/influenced_by	/m/03sbs	1
/m/07j8kh	/film/film/estimated_budget./measurement_unit/dated_money_value/currency	/m/046m59	0
/m/0gq_v	/award/award_category/nominees./award/award_nomination/nominated_for	/m/017gm7	1
/m/06mq7	/tv/non_character_role/tv_regular_personal_appearances./tv/tv_regular_personal_appearance/person	/m/041sbd	0
/m/0582cf	/film/actor/film./film/performance/film	/m/02qhqz4	1
/m/012ky3	/music/artist/origin	/m/0f0p0	0
/m/02vxn	/education/field_of_study/students_majoring./education/education/major_field_of_study	/m/05qdh	1
/m/0177sq	/government/politician/government_positions_held./government/government_position_held/jurisdiction_of_office	/m/0rtv	0
/m/02py8_w	/sports/sports_team/colors	/m/0jc_p	1
/m/0n83s	/education/educational_institution/school_type	/m/0159h6	0
/m/02x1dht	/award/award_category/nominees./award/award_nomination/nominated_for	/m/02rn00y	1
/m/0yx7h	/government/politician/government_positions_held./government/government_position_held/basic_title	/m/0kfhjq0	0
/m/07r_dg	/film/actor/film./film/performance/film	/m/091rc5	1
/m/0l2sr	/base/x2010fifaworldcupsouthafrica/world_cup_squad/current_world_cup_squad./base/x2010fifaworldcupsouthafrica/current_world_cup_squad/current_club	/m/0gmgwnv	0
/m/03c602	/music/artist/origin	/m/056_y	1
/m/01rnly	/organization/organization_member/member_of./organization/organization_membership/organization	/m/0dsb_yy	0
/m/03_wvl	/award/award_winner/awards_won./award/award_honor/award_winner	/m/01sl1q	1
/m/0fq27fp	/base/aareas/schema/administrative_area/capital	/m/011j5x	0
/m/043vc	/sports/professional_sports_team/draft_picks./sports/sports_league_draft_pick/draft	/m/092j54	1
/m/0ct9_	/education/educational_degree/people_with_this_degree./education/education/student	/m/01c9jp	0
/m/02_j1w	/sports/sports_position/players./sports/sports_team_roster/team	/m/04knvh	1
/m/02py4c8	/education/university/local_tuition./measurement_unit/dated_money_value/currency	/m/05fkf	0
/m/0ws7	/sports/sports_team/roster./american_football/football_historical_roster_position/position_s	/m/01_9c1	1
/m/01b9w3	/influence/influence_node/influenced_by	/m/07kb7vh	0
/m/01kws3	/tv/tv_producer/programs_produced./tv/tv_producer_term/program	/m/0kfpm	1
/m/04hzj	/olympics/olympic_sport/athletes./olympics/olympic_athlete_affiliation/olympics	/m/04l19_	0
/m/0237fw	/base/popstra/celebrity/breakup./base/popstra/breakup/participant	/m/01z0rcq	1
/m/05kj_	/celebrities/celebrity/celebrity_friends./celebrities/friendship/friend	/m/0hkwr	0
/m/02py8_w	/sports/sports_team/colors	/m/01g5v	1
/m/067zx9	/education/educational_institution/colors	/m/0n6bs	0
/m/0gq_v	/award/award_category/nominees./award/award_nomination/nominated_for	/m/09gq0x5	1
/m/04xhwn	/dataworld/gardening_hint/split_to	/m/01j7pt	0
/m/07l50vn	/film/film/release_date_s./film/film_regional_release_date/film_release_region	/m/03gj2	1
/m/033cnk	/film/film/written_by	/m/01wgjj5	0
/m/09rx7tx	/film/film/personal_appearances./film/personal_film_appearance/person	/m/02m3sd	1
/m/03y9ccy	/base/americancomedy/celebrity_impressionist/celebrities_impersonated	/m/09rx7tx	0
/m/026t6	/music/performance_role/track_performances./music/track_contribution/role	/m/07y_7	1
/m/0125xq	/film/film/film_production_design_by	/m/07ytt	0
/m/01bns_	/music/performance_role/track_performances./music/track_contribution/role	/m/026t6	1
/m/03bggl	/base/americancomedy/celebrity_impressionist/celebrities_impersonated	/m/0bxjv	0
/m/0bjrnt	/education/educational_degree/people_with_this_degree./education/education/major_field_of_study	/m/05qjt	1
/m/03xks	/music/artist/origin	/m/08htt0	0
/m/03_wvl	/award/award_nominee/award_nominations./award/award_nomination/award_nominee	/m/01sl1q	1
/m/0rtv	/film/actor/film./film/performance/film	/m/01vmv_	0
/m/0345h	/media_common/netflix_genre/titles	/m/085ccd	1
/m/01ynzf	/education/educational_degree/people_with_this_degree./education/education/institution	/m/03q91d	0
/m/015g28	/film/film/language	/m/04306rv	1
/m/03g9xj	/award/award_nominee/award_nominations./award/award_nomination/award_nominee	/m/070w7s	0
/m/03bwzr4	/education/educational_degree/people_with_this_degree./education/education/major_field_of_study	/m/02_7t	1
/m/01g888	/organization/role/leaders./organization/leadership/organization	/m/03ym1	0
/m/011k_j	/music/instrument/family	/m/026t6	1
/m/01qb5d	/award/award_ceremony/awards_presented./award/award_honor/honored_for	/m/0ct9_	0
/m/060bp	/government/government_office_category/officeholders./government/government_position_held/jurisdiction_of_office	/m/01n8qg	1
/m/0172jm	/location/country/capital	/m/0gj4fx	0
/m/01k70_	/award/award_winner/awards_won./award/award_honor/award_winner	/m/02qssrm	1
/m/0bt7w	/government/legislative_session/members./government/government_position_held/district_represented	/m/01fd26	0
/m/0yfvf	/location/location/time_zones	/m/02hcv8	1
/m/05f0r8	/music/performance_role/regular_performances./music/group_membership/group	/m/0g5gq	0
/m/021y7yw	/award/award_winning_work/awards_won./award/award_honor/award	/m/0fq9zdn	1
/m/0glbqt	/film/film/language	/m/0gfw56	0
/m/06q07	/base/schemastaging/organization_extra/phone_number./base/schemastaging/phone_sandbox/service_language	/m/03_9r	1
/m/07ykkx5	/people/person/place_of_birth	/m/02pt6k_	0
/m/019f4v	/award/award_category/nominees./award/award_nomination/nominated_for	/m/011ycb	1
/m/03y9ccy	/music/performance_role/track_performances./music/track_contribution/role	/m/03__y	0
/m/0f4m2z	/film/film/release_date_s./film/film_regional_release_date/film_release_region	/m/03rjj	1
/m/07f8wg	/film/film/executive_produced_by	/m/07nt8p	0
/m/0gq_d	/award/award_category/winners./award/award_honor/ceremony	/m/02jp5r	1
/m/0mzj_	/film/film/other_crew./film/film_crew_gig/crewmember	/m/01rnly	0
/m/0cc56	/location/location/adjoin_s./location/adjoining_relationship/adjoins	/m/02m4d	1
/m/03rt9	/film/film/cinematography	/m/04kjrv	0
/m/0525b	/award/award_nominee/award_nominations./award/award_nomination/award_nominee	/m/05dbf	1
/m/02qssrm	/film/film/language	/m/024mxd	0
/m/0d500h	/people/person/places_lived./people/place_lived/location	/m/0cc56	1
/m/0ct2tf5	/film/film/edited_by	/m/02py4c8	0
/m/046m59	/film/actor/film./film/performance/film	/m/07gp9	1
/m/05cwl_	/music/performance_role/guest_performances./music/recording_contribution/performance_role	/m/040p_q	0
/m/019f4v	/award/award_category/nominees./award/award_nomination/nominated_for	/m/035yn8	1
/m/0f6lx	/music/record_label/artist	/m/0khth	0
/m/0htww	/film/film/release_date_s./film/film_regional_release_date/film_release_region	/m/03rjj	1
/m/0jsg0m	/people/person/place_of_birth	/m/084x96	0
/m/0ddkf	/people/person/places_lived./people/place_lived/location	/m/0ccvx	1
/m/07j8kh	/time/event/locations	/m/05bkf	0
/m/0bjrnt	/education/educational_degree/people_with_this_degree./education/education/institution	/m/0177sq	1
/m/02qhm3	/award/award_winning_work/awards_won./award/award_honor/award	/m/03fts	0
/m/0fbw6	/food/food/nutrients./food/nutrition_fact/nutrient	/m/05wvs	1
/m/01w56k	/location/hud_county_place/county	/m/0fpj4lx	0
/m/01mk6	/organization/organization_member/member_of./organization/organization_membership/organization	/m/04k4l	1
/m/07qy0b	/people/person/religion	/m/05kj_	0
/m/0by1wkq	/film/film/release_date_s./film/film_regional_release_date/film_release_region	/m/03gj2	1
/m/0284h6	/award/award_ceremony/awards_presented./award/award_honor/award_winner	/m/0jtg0	0
/m/0c6g1l	/film/actor/film./film/performance/film	/m/08phg9	1
/m/03g9xj	/film/film/release_date_s./film/film_regional_release_date/film_regional_debut_venue	/m/0lcx	0
/m/0bjkpt	/award/award_nominee/award_nominations./award/award_nomination/nominated_for	/m/03mh94	1
/m/01y8zd	/film/film/featured_film_locations	/m/015mlw	0
/m/08b0cj	/sports/pro_athlete/teams./sports/sports_team_roster/team	/m/03h0k1	1
/m/01vvzb1	/base/schemastaging/organization_extra/phone_number./base/schemastaging/phone_sandbox/service_location	/m/04jpl	0
/m/01f_mw	/film/film_distributor/films_distributed./film/film_film_distributor_relationship/film	/m/0y_9q	1
/m/01cr28	/location/statistical_region/places_exported_to./location/imports_and_exports/exported_to	/m/0dzs0	0
/m/011k_j	/music/performance_role/guest_performances./music/recording_contribution/performance_role	/m/026t6	1
/m/02kzfw	/music/artist/track_contributions./music/track_contribution/role	/m/0459q4	0
/m/0gq9h	/award/award_category/winners./award/award_honor/award_winner	/m/04wvhz	1
/m/01vvzb1	/location/administrative_division/first_level_division_of	/m/01dy7j	0
/m/057lbk	/film/film/other_crew./film/film_crew_gig/film_crew_role	/m/033smt	1
/m/07nt8p	/education/field_of_study/students_majoring./education/education/student	/m/0542n	0
/m/02qssrm	/award/award_nominee/award_nominations./award/award_nomination/award_nominee	/m/01k70_	1
/m/07j8kh	/education/field_of_study/students_majoring./education/education/student	/m/01445t	0
/m/07xl34	/organization/role/leaders./organization/leadership/organization	/m/031hxk	1
/m/05dss7	/organization/role/leaders./organization/leadership/organization	/m/0d2by	0
/m/0gq9h	/award/award_category/nominees./award/award_nomination/nominated_for	/m/02rn00y	1
/m/050ks	/people/person/sibling_s./people/sibling_relationship/sibling	/m/0glbqt	0
/m/05kkh	/location/statistical_region/religions./location/religion_percentage/religion	/m/051kv	1
/m/0l14j_	/olympics/olympic_participating_country/medals_won./olympics/olympic_medal_honor/olympics	/m/01cjhz	0
/m/011k_j	/music/performance_role/regular_performances./music/group_membership/role	/m/03bx0bm	1
/m/0d6b7	/base/biblioness/bibs_location/country	/m/04jwly	0
/m/058z1hb	/award/award_nominee/award_nominations./award/award_nomination/award	/m/0gq_v	1
/m/03rt9	/user/alexander/philosophy/philosopher/interests	/m/02w9sd7	0
/m/0bvzp	/award/award_nominee/award_nominations./award/award_nomination/award	/m/02581c	1
/m/01ynzf	/education/field_of_study/students_majoring./education/education/major_field_of_study	/m/02qssrm	0
/m/0187y5	/base/popstra/celebrity/dated./base/popstra/dated/participant	/m/0cbkc	1
/m/0c0tzp	/tv/tv_personality/tv_regular_appearances./tv/tv_regular_personal_appearance/program	/m/02mjf2	0
/m/017s11	/award/award_nominee/award_nominations./award/award_nomination/award	/m/0gq_d	1
/m/0t_71	/tv/tv_program/program_creator	/m/06nz46	0
/m/05zvj3m	/award/award_category/nominees./award/award_nomination/nominated_for	/m/01k0vq	1
/m/09nhvw	/business/business_operation/industry	/m/03h_f4	0
/m/03q5t	/music/performance_role/track_performances./music/track_contribution/role	/m/07y_7	1
/m/018d6l	/film/film/release_date_s./film/film_regional_release_date/film_regional_debut_venue	/m/0hgxh	0
/m/03_gz8	/film/film/genre	/m/02p0szs	1
/m/0421st	/organization/organization_member/member_of./organization/organization_membership/organization	/m/03z9585	0
/m/0bh8tgs	/film/film/release_date_s./film/film_regional_release_date/film_release_region	/m/06mkj	1
/m/019mlh	/people/person/spouse_s./people/marriage/location_of_ceremony	/m/01tdpv	0
/m/0h0jz	/film/actor/film./film/performance/film	/m/03x7hd	1
/m/062zm5h	/award/award_nominee/award_nominations./award/award_nomination/award_nominee	/m/016pns	0
/m/033tf_	/people/ethnicity/people	/m/0h1mt	1
/m/025y9fn	/olympics/olympic_participating_country/medals_won./olympics/olympic_medal_honor/olympics	/m/02tx6q	0
/m/07gp9	/film/film/featured_film_locations	/m/0q_xk	1
/m/0gq9h	/user/jg/default_domain/olympic_games/sports	/m/0xjl2	0
/m/03dj48	/base/x2010fifaworldcupsouthafrica/world_cup_squad/current_world_cup_squad./base/x2010fifaworldcupsouthafrica/current_world_cup_squad/current_club	/m/0hvgt	1
/m/0c61p	/award/award_category/winners./award/award_honor/award_winner	/m/0gxmj	0
/m/01vsps	/people/person/place_of_birth	/m/096gm	1
/m/02fsn	/education/university/domestic_tuition./measurement_unit/dated_money_value/currency	/m/0vm5t	0
/m/07vyf	/education/educational_institution/students_graduates./education/education/major_field_of_study	/m/02_7t	1
/m/0hskw	/olympics/olympic_sport/athletes./olympics/olympic_athlete_affiliation/country	/m/07sqbl	0
/m/099c8n	/award/award_category/nominees./award/award_nomination/nominated_for	/m/05jzt3	1
/m/07_m9_	/tv/tv_program/program_creator	/m/056_y	0
/m/01p1z_	/award/award_nominee/award_nominations./award/award_nomination/award	/m/0gqy2	1
/m/01b9w3	/base/americancomedy/celebrity_impressionist/celebrities_impersonated	/m/04k8n	0
/m/017m2y	/base/popstra/celebrity/friendship./base/popstra/friendship/participant	/m/0zjpz	1
/m/02hxhz	/people/person/place_of_birth	/m/0h407	0
/m/078lk	/location/administrative_division/first_level_division_of	/m/03rjj	1
/m/0cd25	/film/film_subject/films	/m/046vvc	0
/m/03ym1	/award/award_nominee/award_nominations./award/award_nomination/award	/m/099ck7	1
/m/078lk	/location/location/partially_contains	/m/03dj48	0
/m/026bt_h	/sports/sports_team/roster./american_football/football_historical_roster_position/position_s	/m/05fyy5	1
/m/0bjrnt	/education/educational_degree/people_with_this_degree./education/education/major_field_of_study	/m/0275_pj	0
/m/0fp_xp	/sports/pro_athlete/teams./sports/sports_team_roster/team	/m/02b10w	1
/m/06q07	/user/alexander/philosophy/philosopher/interests	/m/02hxhz	0
/m/0459q4	/language/human_language/countries_spoken_in	/m/03h64	1
/m/06cc_1	/film/director/film	/m/0l2sr	0
/m/042xh	/people/person/profession	/m/0cbd2	1
/m/0hx4y	/location/capital_of_administrative_division/capital_of./location/administrative_division_capital_relationship/administrative_division	/m/03_qj1	0
/m/011j5x	/music/genre/artists	/m/01wgjj5	1
/m/05f0r8	/film/film/prequel	/m/01wgjj5	0
/m/0418154	/award/award_ceremony/awards_presented./award/award_honor/honored_for	/m/02pjc1h	1
/m/09qh1	/base/popstra/celebrity/canoodled./base/popstra/canoodled/participant	/m/0sqc8	0
/m/02tk74	/people/person/place_of_birth	/m/04jpl	1
/m/0h0jz	/base/popstra/celebrity/dated./base/popstra/dated/participant	/m/01s5q	0
/m/033gn8	/education/educational_institution/students_graduates./education/education/student	/m/02661h	1
/m/0sngf	/people/profession/specialization_of	/m/0c3jz	0
/m/024fz9	/award/award_category/winners./award/award_honor/award_winner	/m/0p7h7	1
/m/09gkdln	/location/administrative_division/country	/m/06rrzn	0
/m/02_j1w	/sports/sports_position/players./sports/sports_team_roster/team	/m/045346	1
/m/06zgc	/olympics/olympic_games/sports	/m/07r_dg	0
/m/02v0ff	/award/award_winner/awards_won./award/award_honor/award_winner	/m/02qssrm	1
/m/013423	/tv/tv_personality/tv_regular_appearances./tv/tv_regular_personal_appearance/program	/m/0d6b7	0
/m/076psv	/award/award_nominee/award_nominations./award/award_nomination/nominated_for	/m/0kvb6p	1
/m/02rb84n	/film/film/genre	/m/0_jq4	0
/m/03rbzn	/olympics/olympic_sport/athletes./olympics/olympic_athlete_affiliation/country	/m/0345h	1
/m/01vsps	/location/us_county/county_seat	/m/016pns	0
/m/02mxw0	/award/award_nominee/award_nominations./award/award_nomination/award	/m/0bdwqv	1
/m/083p7	/soccer/football_team/current_roster./sports/sports_team_roster/position	/m/0gv07g	0
/m/02jxkw	/people/person/places_lived./people/place_lived/location	/m/0xl08	1
/m/035zr0	/film/film/costume_design_by	/m/06rrzn	0
/m/033tf_	/people/ethnicity/people	/m/03x16f	1
/m/01ck6v	/award/award_nominee/award_nominations./award/award_nomination/award_nominee	/m/0jgwf	0
/m/057lbk	/film/film/genre	/m/01hmnh	1
/m/041wm	/sports/sports_league_draft/picks./sports/sports_league_draft_pick/school	/m/01_f_5	0
/m/016_mj	/film/actor/film./film/performance/film	/m/0p9lw	1
/m/0ttxp	/education/educational_degree/people_with_this_degree./education/education/institution	/m/0d68qy	0
/m/05_6_y	/soccer/football_player/current_team./sports/sports_team_roster/team	/m/0272vm	1
/m/02gr81	/award/award_nominated_work/award_nominations./award/award_nomination/nominated_for	/m/07gdw	0
/m/0k7tq	/film/film/release_date_s./film/film_regional_release_date/film_release_region	/m/05r4w	1
/m/07qv_	/user/jg/default_domain/olympic_games/sports	/m/03mkk4	0
/m/0dlhg	/location/location/time_zones	/m/02hcv8	1
/m/0cvw9	/music/performance_role/track_performances./music/track_contribution/role	/m/0gqfy	0
/m/0ft18	/film/film/genre	/m/082gq	1
/m/056_y	/education/educational_degree/people_with_this_degree./education/education/major_field_of_study	/m/07_m9_	0
/m/015g28	/award/award_winning_work/awards_won./award/award_honor/award_winner	/m/025y9fn	1
/m/01dzq6	/base/popstra/celebrity/breakup./base/popstra/breakup/participant	/m/0qpsn	0
/m/02g_6j	/sports/sports_position/players./sports/sports_team_roster/team	/m/025v1sx	1
/m/028kj0	/medicine/disease/risk_factors	/m/0mwxz	0
/m/0gq_d	/award/award_category/winners./award/award_honor/ceremony	/m/0fzrhn	1
/m/0ktx_	/tv/tv_program/program_creator	/m/0l12d	0
/m/01vt5c_	/people/person/places_lived./people/place_lived/location	/m/04jpl	1
/m/05mrf_p	/tv/tv_program/languages	/m/0j0k	0
/m/0gq9h	/award/award_category/nominees./award/award_nomination/nominated_for	/m/0hv81	1
/m/01z9_x	/medicine/disease/notable_people_with_this_condition	/m/06cc_1	0
/m/03__77	/soccer/football_team/current_roster./sports/sports_team_roster/position	/m/02_j1w	1
/m/0dbpwb	/soccer/football_player/current_team./sports/sports_team_roster/team	/m/01grpq	0
/m/025y9fn	/award/award_nominee/award_nominations./award/award_nomination/award_nominee	/m/07lwsz	1
/m/0ds1glg	/film/film/language	/m/073bb	0
/m/0h1n9	/medicine/disease/risk_factors	/m/02ctzb	1
/m/02cgp8	/base/popstra/celebrity/dated./base/popstra/dated/participant	/m/033smt	0
/m/04rsd2	/award/award_nominee/award_nominations./award/award_nomination/award_nominee	/m/016xh5	1
/m/062zm5h	/location/location/adjoin_s./location/adjoining_relationship/adjoins	/m/0q_xk	0
/m/01hmnh	/media_common/netflix_genre/titles	/m/0d4htf	1
/m/0cbd2	/location/location/adjoin_s./location/adjoining_relationship/adjoins	/m/0ds2n	0
/m/09b0xs	/tv/tv_writer/tv_programs./tv/tv_program_writer_relationship/tv_program	/m/0vhm	1
/m/09rwjly	/organization/endowed_organization/endowment./measurement_unit/dated_money_value/currency	/m/01fd26	0
/m/04hk0w	/film/film/language	/m/01jb8r	1
/m/0ktx_	/people/ethnicity/geographic_distribution	/m/05pt0l	0
/m/0bh8tgs	/film/film/other_crew./film/film_crew_gig/film_crew_role	/m/01xy5l_	1
/m/0bt7w	/education/university/international_tuition./measurement_unit/dated_money_value/currency	/m/05zl0	0
/m/02dlh2	/music/performance_role/track_performances./music/track_contribution/role	/m/026t6	1
/m/07ypt	/military/military_conflict/combatants./military/military_combatant_group/combatants	/m/0_jq4	0
/m/0n5jm	/location/location/adjoin_s./location/adjoining_relationship/adjoins	/m/0mwxz	1
/m/06n3y	/film/film/edited_by	/m/03_wm6	0
/m/06bng	/award/award_nominee/award_nominations./award/award_nomination/award	/m/0265vt	1
/m/032xhg	/education/field_of_study/students_majoring./education/education/major_field_of_study	/m/013t9y	0
/m/05zvj3m	/award/award_category/winners./award/award_honor/award_winner	/m/0n6f8	1
/m/0jz71	/music/performance_role/regular_performances./music/group_membership/group	/m/01g888	0
/m/04wvhz	/award/award_winner/awards_won./award/award_honor/award_winner	/m/07lwsz	1
/m/02p0szs	/award/award_nominee/award_nominations./award/award_nomination/award_nominee	/m/06dfg	0
/m/08wq0g	/award/award_nominee/award_nominations./award/award_nomination/award_nominee	/m/0bt7ws	1
/m/0dll_t2	/award/award_ceremony/awards_presented./award/award_honor/award_winner	/m/092c5f	0
/m/0m_v0	/award/award_winner/awards_won./award/award_honor/award_winner	/m/02cx90	1
/m/0l14j_	/award/ranked_item/appears_in_ranked_lists./award/ranking/list	/m/080dwhx	0
/m/0gqy2	/award/award_category/nominees./award/award_nomination/nominated_for	/m/0jz71	1
/m/0163m1	/government/politician/government_positions_held./government/government_position_held/jurisdiction_of_office	/m/03z0dt	0
/m/01wdqrx	/award/award_winner/awards_won./award/award_honor/award_winner	/m/01s21dg	1
/m/021_rm	/people/person/spouse_s./people/marriage/spouse	/m/04h6m	0
/m/07y_7	/music/instrument/instrumentalists	/m/01tp5bj	1
/m/0k_s5	/music/genre/parent_genre	/m/0_nh2	0
/m/02vy5j	/award/award_nominee/award_nominations./award/award_nomination/nominated_for	/m/09cr8	1
/m/07_m9_	/education/university/domestic_tuition./measurement_unit/dated_money_value/currency	/m/0421st	0
/m/0t_hx	/location/location/time_zones	/m/02hcv8	1
/m/0fltx	/location/us_county/county_seat	/m/0432cd	0
/m/099c8n	/award/award_category/nominees./award/award_nomination/nominated_for	/m/09k56b7	1
/m/01kgxf	/award/award_category/winners./award/award_honor/ceremony	/m/05kj_	0
/m/0ljbg	/sports/sports_team/colors	/m/01g5v	1
/m/0gqfy	/media_common/netflix_genre/titles	/m/05d9y_	0
/m/0gh65c5	/film/film/release_date_s./film/film_regional_release_date/film_release_region	/m/03rt9	1
/m/0517bc	/people/ethnicity/people	/m/01vj9c	0
/m/0l14j_	/music/performance_role/regular_performances./music/group_membership/role	/m/02fsn	1
/m/0ptxj	/olympics/olympic_participating_country/medals_won./olympics/olympic_medal_honor/olympics	/m/08b0cj	0
/m/0gq_v	/award/award_category/nominees./award/award_nomination/nominated_for	/m/083skw	1
/m/01fmy9	/award/award_ceremony/awards_presented./award/award_honor/award_winner	/m/0167q3	0
/m/02dlh2	/music/performance_role/guest_performances./music/recording_contribution/performance_role	/m/0l14j_	1
/m/05glt	/film/film/release_date_s./film/film_regional_release_date/film_regional_debut_venue	/m/01f_mw	0
/m/01vv6xv	/people/person/profession	/m/0dz3r	1
/m/073bb	/music/artist/track_contributions./music/track_contribution/role	/m/0gfw56	0
/m/02b1gz	/soccer/football_team/current_roster./soccer/football_roster_position/position	/m/02_j1w	1
/m/0nz_b	/tv/tv_program/languages	/m/0t_2	0
/m/0cq7kw	/film/film/written_by	/m/012wg	1
/m/051qvn	/olympics/olympic_participating_country/medals_won./olympics/olympic_medal_honor/olympics	/m/02gnh0	0
/m/02cx90	/award/award_nominee/award_nominations./award/award_nomination/award_nominee	/m/011zf2	1
/m/0_jq4	/location/country/capital	/m/01hqk	0
/m/0vhm	/award/award_winning_work/awards_won./award/award_honor/award_winner	/m/09b0xs	1
/m/0gqfy	/film/film/music	/m/04k8n	0
/m/024n3z	/award/award_nominee/award_nominations./award/award_nomination/award_nominee	/m/03ym1	1
/m/01s5q	/food/food/nutrients./food/nutrition_fact/nutrient	/m/09lwrt	0
/m/01l03w2	/award/award_nominee/award_nominations./award/award_nomination/award_nominee	/m/01k5t_3	1
/m/06y611	/film/film/film_production_design_by	/m/0dzs0	0
/m/0hskw	/award/award_nominee/award_nominations./award/award_nomination/award	/m/0gq9h	1
/m/0gt14	/user/jg/default_domain/olympic_games/sports	/m/017f3m	0
/m/03n3gl	/film/film/genre	/m/05mrx8	1
/m/01vtj38	/award/award_nominee/award_nominations./award/award_nomination/nominated_for	/m/033cnk	0
/m/050ks	/location/location/contains	/m/0172jm	1
/m/025sf8g	/government/political_party/politicians_in_this_party./government/political_party_tenure/politician	/m/01w8sf	0
/m/035l_9	/sports/sports_team/colors	/m/01g5v	1
/m/0nz_b	/award/award_ceremony/awards_presented./award/award_honor/honored_for	/m/01ck6v	0
/m/02lf1j	/people/person/places_lived./people/place_lived/location	/m/0d6lp	1
/m/07qv_	/base/popstra/celebrity/breakup./base/popstra/breakup/participant	/m/01s3kv	0
/m/0gqy2	/award/award_category/winners./award/award_honor/ceremony	/m/0bzmt8	1
/m/0c7ct	/base/biblioness/bibs_location/country	/m/0bxjv	0
/m/05qdh	/education/field_of_study/students_majoring./education/education/major_field_of_study	/m/02822	1
/m/03h64	/location/location/contains	/m/01c9jp	0
/m/04btyz	/media_common/netflix_genre/titles	/m/0bxsk	1
/m/0yx7h	/award/award_category/winners./award/award_honor/award_winner	/m/0khth	0
/m/0bbf1f	/film/actor/film./film/performance/film	/m/0ch3qr1	1
/m/0f5kw7	/music/group_member/membership./music/group_membership/group	/m/0gsrz4	0
/m/02vp1f_	/film/film/genre	/m/01hmnh	1
/m/057lbk	/base/popstra/celebrity/dated./base/popstra/dated/participant	/m/07nf6	0
/m/01s21dg	/people/person/profession	/m/01xy5l_	1
/m/03_wm6	/film/film/executive_produced_by	/m/01w56k	0
/m/02tk74	/people/person/places_lived./people/place_lived/location	/m/04jpl	1
/m/0517bc	/film/film/estimated_budget./measurement_unit/dated_money_value/currency	/m/070w7s	0
/m/0gq9h	/award/award_category/nominees./award/award_nomination/nominated_for	/m/08xvpn	1
/m/0gq9h	/soccer/football_team/current_roster./sports/sports_team_roster/position	/m/0pml7	0
/m/06r_by	/people/person/profession	/m/0dgd_	1
/m/07gdw	/education/university/local_tuition./measurement_unit/dated_money_value/currency	/m/07kb7vh	0
/m/0gr0m	/award/award_category/winners./award/award_honor/award_winner	/m/06hzsx	1
/m/04_bfq	/music/performance_role/regular_performances./music/group_membership/group	/m/0n5c9	0
/m/026t6	/music/performance_role/track_performances./music/track_contribution/role	/m/02fsn	1
/m/015g28	/base/americancomedy/celebrity_impressionist/celebrities_impersonated	/m/0gt14	0
/m/0h95927	/film/film/release_date_s./film/film_regional_release_date/film_release_region	/m/06mkj	1
/m/02h30z	/music/genre/parent_genre	/m/01dbhb	0
/m/0fzrhn	/award/award_ceremony/awards_presented./award/award_honor/award_winner	/m/0c6g29	1
/m/01ynzf	/education/educational_degree/people_with_this_degree./education/education/major_field_of_study	/m/05hd32	0
/m/0372kf	/people/person/religion	/m/051kv	1
/m/01ry0f	/education/educational_degree/people_with_this_degree./education/education/major_field_of_study	/m/01wp8w7	0
/m/053yx	/award/award_nominee/award_nominations./award/award_nomination/award	/m/02tj96	1
/m/03fts	/soccer/football_player/current_team./sports/sports_team_roster/team	/m/07qy0b	0
/m/0gj50	/award/award_winning_work/awards_won./award/award_honor/award	/m/02pz3j5	1
/m/016j68	/award/award_ceremony/awards_presented./award/award_honor/award_winner	/m/02f8lw	0
/m/018d6l	/people/person/profession	/m/09jwl	1
/m/04m064	/location/capital_of_administrative_division/capital_of./location/administrative_division_capital_relationship/administrative_division	/m/02vrgnr	0
/m/02p_ycc	/award/award_winner/awards_won./award/award_honor/award_winner	/m/021_rm	1
/m/0f4vx	/film/film/film_festivals	/m/01vc5m	0
/m/0gj8nq2	/film/film/release_date_s./film/film_regional_release_date/film_release_region	/m/03h2c	1
/m/016zgj	/organization/role/leaders./organization/leadership/organization	/m/06929s	0
/m/017s11	/film/film_distributor/films_distributed./film/film_film_distributor_relationship/film	/m/021pqy	1
/m/056_y	/film/film/release_date_s./film/film_regional_release_date/film_release_region	/m/01dbhb	0
/m/04lqvlr	/film/film/country	/m/03rjj	1
/m/04jpk2	/award/award_nominated_work/award_nominations./award/award_nomination/nominated_for	/m/05jzt3	0
/m/02fsn	/music/performance_role/track_performances./music/track_contribution/role	/m/0dwt5	1
/m/07ytt	/user/jg/default_domain/olympic_games/sports	/m/01vt5c_	0
/m/03rbzn	/olympics/olympic_sport/athletes./olympics/olympic_athlete_affiliation/country	/m/05r4w	1
/m/07xl34	/government/politician/government_positions_held./government/government_position_held/basic_title	/m/09cdxn	0
/m/01k8q5	/education/university/international_tuition./measurement_unit/dated_money_value/currency	/m/01nv4h	1
/m/0192hw	/film/film/production_companies	/m/02py8_w	0
/m/0dwt5	/music/performance_role/regular_performances./music/group_membership/role	/m/03q5t	1
/m/024fz9	/award/award_ceremony/awards_presented./award/award_honor/honored_for	/m/0drrw	0
/m/026mj	/location/location/time_zones	/m/02hcv8	1
/m/0ds460j	/tv/tv_program/regular_cast./tv/regular_tv_appearance/actor	/m/05j49	0
/m/02dlh2	/music/performance_role/regular_performances./music/group_membership/role	/m/0l14j_	1
/m/02w86hz	/base/popstra/location/vacationers./base/popstra/vacation_choice/vacationer	/m/0356gk	0
/m/0486tv	/olympics/olympic_sport/athletes./olympics/olympic_athlete_affiliation/country	/m/0j1z8	1
/m/01w1ywm	/sports/sports_team/roster./american_football/football_historical_roster_position/position_s	/m/0khth	0
/m/0d68qy	/tv/tv_program/genre	/m/06nbt	1
/m/07kb7vh	/base/schemastaging/organization_extra/phone_number./base/schemastaging/phone_sandbox/service_language	/m/02kx91	0
/m/028d4v	/award/award_nominee/award_nominations./award/award_nomination/award_nominee	/m/073749	1
/m/02xlf	/organization/organization/place_founded	/m/03078l	0
/m/07mz77	/people/person/nationality	/m/0345h	1
/m/04jpk2	/base/popstra/celebrity/canoodled./base/popstra/canoodled/participant	/m/09qh1	0
/m/0kzy0	/award/award_nominee/award_nominations./award/award_nomination/award	/m/03qbnj	1
/m/01vmv_	/film/actor/film./film/performance/film	/m/01fmy9	0
/m/04x1_w	/film/actor/film./film/performance/film	/m/03bx2lk	1
/m/0432cd	/sports/sports_team_location/teams	/m/0dqzkv	0
/m/015pxr	/award/award_nominee/award_nominations./award/award_nomination/award	/m/0bdwqv	1
/m/01f7v_	/people/person/spouse_s./people/marriage/location_of_ceremony	/m/026qnh6	0
/m/03qnvdl	/film/film/release_date_s./film/film_regional_release_date/film_release_region	/m/05sb1	1
/m/03yk8z	/film/film/other_crew./film/film_crew_gig/film_crew_role	/m/02rb84n	0
/m/05dss7	/film/film/other_crew./film/film_crew_gig/crewmember	/m/02xc1w4	1
/m/019z7b	/music/group_member/membership./music/group_membership/role	/m/02qhm3	0
/m/02_hj4	/award/award_winner/awards_won./award/award_honor/award_winner	/m/06lvlf	1
/m/0gh6j94	/government/government_office_category/officeholders./government/government_position_held/jurisdiction_of_office	/m/02qsqmq	0
/m/0gtvrv3	/film/film/release_date_s./film/film_regional_release_date/film_release_region	/m/03h64	1
/m/0zm1	/time/event/locations	/m/0fltx	0
/m/08phg9	/award/award_winning_work/awards_won./award/award_honor/award_winner	/m/024n3z	1
/m/0t_71	/film/film/other_crew./film/film_crew_gig/crewmember	/m/01f8hf	0
/m/01g4yw	/education/university/international_tuition./measurement_unit/dated_money_value/currency	/m/01nv4h	1
/m/01r_t_	/film/film/estimated_budget./measurement_unit/dated_money_value/currency	/m/04jpk2	0
/m/018yj6	/people/person/profession	/m/0cbd2	1
/m/026qnh6	/people/ethnicity/languages_spoken	/m/0pml7	0
/m/01s1zk	/people/person/profession	/m/0dz3r	1
/m/04kr63w	/film/film/estimated_budget./measurement_unit/dated_money_value/currency	/m/083skw	0
/m/0gjc4d3	/film/film/release_date_s./film/film_regional_release_date/film_release_region	/m/03h64	1
/m/04rsd2	/organization/endowed_organization/endowment./measurement_unit/dated_money_value/currency	/m/0f4vx	0
/m/02v0ff	/award/award_winner/awards_won./award/award_honor/award_winner	/m/06jvj7	1
/m/02cgp8	/film/film/release_date_s./film/film_regional_release_date/film_release_region	/m/0sngf	0
/m/092c5f	/award/award_ceremony/awards_presented./award/award_honor/award_winner	/m/02661h	1
/m/01_k71	/sports/sports_team/roster./american_football/football_historical_roster_position/position_s	/m/07ykkx5	0
/m/02w9sd7	/award/award_category/nominees./award/award_nomination/nominated_for	/m/04q01mn	1
/m/06gd4	/people/person/religion	/m/03_qj1	0
/m/06jnvs	/tv/tv_producer/programs_produced./tv/tv_producer_term/program	/m/0557yqh	1
/m/0dlhg	/film/film/other_crew./film/film_crew_gig/film_crew_role	/m/09cdxn	0
/m/0gr0m	/award/award_category/nominees./award/award_nomination/nominated_for	/m/02rb607	1
/m/0f6lx	/education/field_of_study/students_majoring./education/education/student	/m/02mz_6	0
/m/03078l	/soccer/football_team/current_roster./soccer/football_roster_position/position	/m/02_j1w	1
/m/02z1nbg	/education/field_of_study/students_majoring./education/education/student	/m/07z6xs	0
/m/070w7s	/award/award_nominee/award_nominations./award/award_nomination/nominated_for	/m/0gj50	1
/m/048cl	/organization/organization/headquarters./location/mailing_address/state_province_region	/m/03h_fk5	0
/m/09fb5	/film/actor/film./film/performance/film	/m/04jpk2	1
/m/02kzfw	/location/capital_of_administrative_division/capital_of./location/administrative_division_capital_relationship/administrative_division	/m/016pns	0
/m/0f40w	/award/award_nominated_work/award_nominations./award/award_nomination/nominated_for	/m/02725hs	1
/m/0dlhg	/music/group_member/membership./music/group_membership/group	/m/0c3xw46	0
/m/0mx6c	/location/location/time_zones	/m/02lcqs	1
/m/02vjp3	/award/award_category/winners./award/award_honor/ceremony	/m/01vvybv	0
/m/02j8nx	/people/person/profession	/m/0cbd2	1
/m/0dtw1x	/organization/organization_member/member_of./organization/organization_membership/organization	/m/0c6g1l	0
/m/0c_dx	/award/award_category/winners./award/award_honor/award_winner	/m/073v6	1
/m/02725hs	/medicine/symptom/symptom_of	/m/02725hs	0
/m/06jnvs	/people/person/profession	/m/0cbd2	1
/m/0459q4	/location/location/time_zones	/m/06q07	0
/m/07lwsz	/award/award_winner/awards_won./award/award_honor/award_winner	/m/04wvhz	1
/m/02jkkv	/base/schemastaging/organization_extra/phone_number./base/schemastaging/phone_sandbox/service_location	/m/046m59	0
/m/02_p8v	/award/award_nominee/award_nominations./award/award_nomination/nominated_for	/m/026zlh9	1
/m/03yk8z	/tv/tv_program/regular_cast./tv/regular_tv_appearance/actor	/m/04jwly	0
/m/0c921	/award/award_nominee/award_nominations./award/award_nomination/nominated_for	/m/0k4f3	1
/m/01w56k	/medicine/disease/risk_factors	/m/02qvzf	0
/m/07s6fsf	/education/educational_degree/people_with_this_degree./education/education/institution	/m/03ksy	1
/m/07_m9_	/organization/role/leaders./organization/leadership/organization	/m/03078l	0
/m/01hmnh	/media_common/netflix_genre/titles	/m/0bl3nn	1
/m/033hn8	/people/person/sibling_s./people/sibling_relationship/sibling	/m/05mrf_p	0
/m/02cx90	/award/award_nominee/award_nominations./award/award_nomination/award_nominee	/m/01m15br	1
/m/051qvn	/location/country/official_language	/m/015rhv	0
/m/037w7r	/film/actor/film./film/performance/film	/m/02vr3gz	1
/m/03yk8z	/base/x2010fifaworldcupsouthafrica/world_cup_squad/current_world_cup_squad./base/x2010fifaworldcupsouthafrica/current_world_cup_squad/current_club	/m/011j5x	0
/m/04svwx	/tv/tv_program/languages	/m/03_9r	1
/m/0f6lx	/location/location/partially_contains	/m/0_nh2	0
/m/02jp5r	/award/award_ceremony/awards_presented./award/award_honor/award_winner	/m/0c4f4	1
/m/01hf6	/film/film/release_date_s./film/film_regional_release_date/film_regional_debut_venue	/m/0517bc	0
/m/03rjj	/media_common/netflix_genre/titles	/m/02psgq	1
/m/073bb	/film/actor/film./film/performance/film	/m/026qnh6	0
/m/02w9sd7	/award/award_category/winners./award/award_honor/award_winner	/m/016yvw	1
/m/0qpn9	/film/film_subject/films	/m/02l3_5	0
/m/0gs1_	/award/award_nominee/award_nominations./award/award_nomination/award	/m/019f4v	1
/m/0dprg	/base/popstra/celebrity/dated./base/popstra/dated/participant	/m/04y5j64	0
/m/017gm7	/film/film/release_date_s./film/film_regional_release_date/film_release_region	/m/03rt9	1
/m/02qhlm	/organization/endowed_organization/endowment./measurement_unit/dated_money_value/currency	/m/08658y	0
/m/02q52q	/award/ranked_item/appears_in_ranked_lists./award/ranking/list	/m/05glt	1
/m/06nv27	/sports/professional_sports_team/draft_picks./sports/sports_league_draft_pick/school	/m/0fvzz	0
/m/0d6lp	/sports/sports_team_location/teams	/m/06rny	1
/m/06zgc	/people/cause_of_death/people	/m/07qy0b	0
/m/01w92	/organization/organization/headquarters./location/mailing_address/citytown	/m/04jpl	1
/m/0c61p	/sports/professional_sports_team/draft_picks./sports/sports_league_draft_pick/draft	/m/02qssrm	0
/m/0jtg0	/music/performance_role/regular_performances./music/group_membership/role	/m/03bx0bm	1
/m/08658y	/people/person/spouse_s./people/marriage/location_of_ceremony	/m/032xhg	0
/m/06jnvs	/award/award_nominee/award_nominations./award/award_nomination/award	/m/0cjyzs	1
/m/01vtj38	/olympics/olympic_sport/athletes./olympics/olympic_athlete_affiliation/country	/m/0jbk9	0
/m/01q7cb_	/base/popstra/celebrity/canoodled./base/popstra/canoodled/participant	/m/0c3jz	1
/m/03rjj	/education/educational_institution/school_type	/m/012vf6	0
/m/024n3z	/award/award_nominee/award_nominations./award/award_nomination/award_nominee	/m/0c6g1l	1
/m/03m6t5	/tv/tv_program/languages	/m/0flw6	0
/m/01nd2c	/soccer/football_team/current_roster./soccer/football_roster_position/position	/m/02_j1w	1
/m/05wvs	/music/genre/artists	/m/01_gv	0
/m/02yxh9	/award/award_ceremony/awards_presented./award/award_honor/honored_for	/m/011yl_	1
/m/06rrzn	/music/performance_role/track_performances./music/track_contribution/role	/m/01ck6v	0
/m/02661h	/people/person/places_lived./people/place_lived/location	/m/01fscv	1
/m/0125xq	/film/film/cinematography	/m/02py4c8	0
/m/0fb1q	/people/person/places_lived./people/place_lived/location	/m/0cc56	1
/m/0f94t	/location/country/second_level_divisions	/m/05glt	0
/m/011k_j	/music/performance_role/guest_performances./music/recording_contribution/performance_role	/m/02dlh2	1
/m/05jf85	/people/ethnicity/people	/m/01j59b0	0
/m/03q5t	/music/performance_role/track_performances./music/track_contribution/role	/m/02fsn	1
/m/033smt	/award/award_winning_work/awards_won./award/award_honor/award_winner	/m/02hxhz	0
/m/0gh65c5	/film/film/release_date_s./film/film_regional_release_date/film_release_region	/m/03rjj	1
/m/0f5kw7	/film/film_set_designer/film_sets_designed	/m/0pz6q	0
/m/03k0yw	/music/artist/track_contributions./music/track_contribution/role	/m/0979zs	1
/m/0ttxp	/film/film/country	/m/05c5xx9	0
/m/0639bg	/award/award_winning_work/awards_won./award/award_honor/award	/m/02x1z2s	1
/m/07s6tbm	/film/director/film	/m/04rsd2	0
/m/026n998	/award/award_nominee/award_nominations./award/award_nomination/award_nominee	/m/08w6v_	1
/m/01qb5d	/award/award_nominee/award_nominations./award/award_nomination/award	/m/07hgkd	0
/m/0584r4	/tv/tv_program/genre	/m/06nbt	1
/m/04lc0h	/people/ethnicity/people	/m/03rt9	0
/m/0ptxj	/award/award_winning_work/awards_won./award/award_honor/award	/m/0gr0m	1
/m/04sj3	/tv/tv_program/regular_cast./tv/regular_tv_appearance/actor	/m/04k4rt	0
/m/02lnbg	/music/genre/artists	/m/03y82t6	1
/m/04m064	/film/film/personal_appearances./film/personal_film_appearance/person	/m/032xhg	0
/m/02_j1w	/sports/sports_position/players./sports/sports_team_roster/team	/m/03lygq	1
/m/0ptxj	/film/actor/film./film/performance/film	/m/041wm	0
/m/05kkh	/location/location/contains	/m/0n1v8	1
/m/01dbhb	/people/person/profession	/m/02pt6k_	0
/m/028d4v	/award/award_nominee/award_nominations./award/award_nomination/nominated_for	/m/02ht1k	1
/m/01vsps	/award/award_category/winners./award/award_honor/ceremony	/m/01_f_5	0
/m/01fh0q	/music/artist/track_contributions./music/track_contribution/role	/m/01vj9c	1
/m/01cgz	/people/person/nationality	/m/01z3d2	0
/m/02g0rb	/people/person/spouse_s./people/marriage/location_of_ceremony	/m/04jpl	1
/m/04bdzg	/dataworld/gardening_hint/split_to	/m/0vhm	0
/m/062zm5h	/film/film/release_date_s./film/film_regional_release_date/film_release_region	/m/0345_	1
/m/031y07	/education/university/local_tuition./measurement_unit/dated_money_value/currency	/m/04gc2	0
/m/0hfzr	/film/film/language	/m/04306rv	1
/m/0n5gb	/education/educational_degree/people_with_this_degree./education/education/major_field_of_study	/m/01w20rx	0
/m/0hz_1	/award/award_nominee/award_nominations./award/award_nomination/nominated_for	/m/030k94	1
/m/0jsg0m	/base/schemastaging/organization_extra/phone_number./base/schemastaging/phone_sandbox/service_location	/m/0l14j_	0
/m/04kny3	/soccer/football_team/current_roster./soccer/football_roster_position/position	/m/02_j1w	1
/m/0bwhdbl	/soccer/football_player/current_team./sports/sports_team_roster/team	/m/03dj48	0
/m/0bm70b	/award/award_category/winners./award/award_honor/award_winner	/m/0hskw	1
/m/04wvhz	/organization/organization/headquarters./location/mailing_address/citytown	/m/030cx	0
/m/04jpk2	/film/film/production_companies	/m/017s11	1
/m/03fts	/education/university/international_tuition./measurement_unit/dated_money_value/currency	/m/0192hw	0
/m/0gtvrv3	/film/film/release_date_s./film/film_regional_release_date/film_release_region	/m/0345h	1
/m/033smt	/film/film/release_date_s./film/film_regional_release_date/film_regional_debut_venue	/m/06jnvs	0
/m/0979zs	/music/performance_role/track_performances./music/track_contribution/role	/m/0dwt5	1
/m/01w56k	/music/group_member/membership./music/group_membership/group	/m/0n59t	0
/m/03pp73	/award/award_nominee/award_nominations./award/award_nomination/award	/m/0bdwqv	1
/m/02_hj4	/education/field_of_study/students_majoring./education/education/major_field_of_study	/m/01wgxtl	0
/m/01vsps	/award/award_nominee/award_nominations./award/award_nomination/award	/m/0gq9h	1
/m/03gj2	/film/film/release_date_s./film/film_regional_release_date/film_release_region	/m/024mxd	0
/m/0fvr1	/film/film/genre	/m/01hmnh	1
/m/011j5x	/location/administrative_division/country	/m/03jht	0
/m/0gh65c5	/film/film/release_date_s./film/film_regional_release_date/film_release_region	/m/05r4w	1
/m/07ytt	/government/government_office_category/officeholders./government/government_position_held/jurisdiction_of_office	/m/0fm6m8	0
/m/04l19_	/award/award_nominee/award_nominations./award/award_nomination/award	/m/02x73k6	1
/m/01z9_x	/education/educational_degree/people_with_this_degree./education/education/institution	/m/07sqbl	0
/m/018d6l	/music/artist/contribution./music/recording_contribution/performance_role	/m/03bx0bm	1
/m/07hgkd	/location/location/contains	/m/05cwl_	0
/m/08b0cj	/sports/pro_athlete/teams./sports/sports_team_roster/team	/m/01gjlw	1
/m/03xx3m	/film/film/executive_produced_by	/m/04cv9m	0
/m/011yqc	/film/film/release_date_s./film/film_regional_release_date/film_release_region	/m/03h64	1
/m/0n5jm	/medicine/disease/notable_people_with_this_condition	/m/09r94m	0
/m/01vmv_	/education/university/international_tuition./measurement_unit/dated_money_value/currency	/m/01nv4h	1
/m/0154fs	/music/genre/artists	/m/02nczh	0
/m/01m15br	/award/award_winner/awards_won./award/award_honor/award_winner	/m/02j3d4	1
/m/0crfwmx	/film/film/written_by	/m/0167q3	0
/m/02w9sd7	/award/award_category/nominees./award/award_nomination/nominated_for	/m/011yl_	1
/m/01nxfc	/award/award_winning_work/awards_won./award/award_honor/honored_for	/m/0c61p	0
/m/024n3z	/award/award_nominee/award_nominations./award/award_nomination/award_nominee	/m/01846t	1
/m/017d77	/film/film/dubbing_performances./film/dubbing_performance/actor	/m/04sv4	0
/m/01c6l	/award/award_nominee/award_nominations./award/award_nomination/nominated_for	/m/0b2v79	1
/m/01lct6	/sports/pro_athlete/teams./sports/sports_team_roster/team	/m/02bp37	0
/m/03j43	/influence/influence_node/influenced_by	/m/0mj0c	1
/m/01445t	/education/educational_degree/people_with_this_degree./education/education/major_field_of_study	/m/05byxm	0
/m/0kzy0	/people/person/profession	/m/0dz3r	1
/m/01pny5	/film/film/other_crew./film/film_crew_gig/film_crew_role	/m/01tt43d	0
/m/0zm1	/people/person/profession	/m/0cbd2	1
/m/0l8g0	/education/university/international_tuition./measurement_unit/dated_money_value/currency	/m/01m8dg	0
/m/01_9c1	/sports/sports_position/players./sports/sports_team_roster/team	/m/06rpd	1
/m/09v51c2	/film/film/estimated_budget./measurement_unit/dated_money_value/currency	/m/056878	0
/m/012x4t	/celebrities/celebrity/celebrity_friends./celebrities/friendship/friend	/m/0grwj	1
/m/03fts	/government/legislative_session/members./government/government_position_held/district_represented	/m/02x73k6	0
/m/0h0jz	/award/award_nominee/award_nominations./award/award_nomination/award	/m/02w9sd7	1
/m/0h326	/film/film/film_festivals	/m/01z3d2	0
/m/0htww	/film/film/release_date_s./film/film_regional_release_date/film_release_region	/m/06mkj	1
/m/06n3y	/music/record_label/artist	/m/01vsps	0
/m/07y_7	/music/performance_role/regular_performances./music/group_membership/role	/m/03bx0bm	1
/m/07qv_	/olympics/olympic_participating_country/medals_won./olympics/olympic_medal_honor/olympics	/m/0ktx_	0
/m/083p7	/people/person/profession	/m/04gc2	1
/m/0_nh2	/music/genre/parent_genre	/m/070zc	0
/m/02w9sd7	/award/award_category/nominees./award/award_nomination/nominated_for	/m/0f4vx	1
/m/01rcmg	/film/film/film_festivals	/m/017m2y	0
/m/0192hw	/film/film/release_date_s./film/film_regional_release_date/film_release_region	/m/05r4w	1
/m/01vg13	/sports/sports_league_draft/picks./sports/sports_league_draft_pick/school	/m/01wgxtl	0
/m/06jw0s	/award/award_winner/awards_won./award/award_honor/award_winner	/m/01k70_	1
/m/06929s	/music/instrument/family	/m/035tlh	0
/m/01wdqrx	/people/person/profession	/m/04f2zj	1
/m/02hmvc	/business/job_title/people_with_this_title./business/employment_tenure/company	/m/02ndy4	0
/m/06q1r	/location/statistical_region/places_exported_to./location/imports_and_exports/exported_to	/m/03rt9	1
/m/01vrt_c	/film/film_set_designer/film_sets_designed	/m/01vrt_c	0
/m/0g1rw	/film/film_distributor/films_distributed./film/film_film_distributor_relationship/film	/m/026zlh9	1
/m/08jcfy	/film/film/edited_by	/m/0l14j_	0
/m/02mxw0	/film/actor/film./film/performance/film	/m/0b4lkx	1
/m/09r94m	/location/administrative_division/first_level_division_of	/m/05glt	0
/m/06l6nj	/people/person/profession	/m/0cbd2	1
/m/0cmc2	/film/film/release_date_s./film/film_regional_release_date/film_release_region	/m/084x96	0
/m/02tr7d	/award/award_nominee/award_nominations./award/award_nomination/award_nominee	/m/0170s4	1
/m/0jhjl	/tv/tv_writer/tv_programs./tv/tv_program_writer_relationship/tv_program	/m/03_wm6	0
/m/014gjp	/tv/tv_program/genre	/m/0c4xc	1
/m/0pf2	/tv/tv_program/program_creator	/m/02nd_	0
/m/0kzy0	/influence/influence_node/influenced_by	/m/0gt_k	1
/m/01tp5bj	/people/person/nationality	/m/01hkhq	0
/m/02tr7d	/award/award_winner/awards_won./award/award_honor/award_winner	/m/0cjsxp	1
/m/01v40wd	/olympics/olympic_participating_country/medals_won./olympics/olympic_medal_honor/olympics	/m/015qsq	0
/m/0hvgt	/soccer/football_team/current_roster./soccer/football_roster_position/position	/m/02_j1w	1
/m/03c7ln	/film/film/genre	/m/0863x_	0
/m/07s6fsf	/education/educational_degree/people_with_this_degree./education/education/institution	/m/015cz0	1
/m/02pt6k_	/education/field_of_study/students_majoring./education/education/major_field_of_study	/m/02jxrw	0
/m/02tk74	/award/award_nominee/award_nominations./award/award_nomination/award	/m/0fq9zdn	1
/m/0qpn9	/tv/tv_writer/tv_programs./tv/tv_program_writer_relationship/tv_program	/m/0jz71	0
/m/03bx0bm	/music/performance_role/regular_performances./music/group_membership/role	/m/0j862	1
/m/03t5kl	/music/artist/origin	/m/016017	0
/m/01hqk	/film/film/music	/m/07j8kh	1
/m/01ry0f	/tv/tv_producer/programs_produced./tv/tv_producer_term/program	/m/0mwh1	0
/m/015qsq	/film/film/featured_film_locations	/m/02nd_	1
/m/0ptxj	/award/award_nominee/award_nominations./award/award_nomination/award_nominee	/m/0mx6c	0
/m/014kkm	/award/award_winning_work/awards_won./award/award_honor/award	/m/0gr0m	1
/m/057lbk	/tv/tv_personality/tv_regular_appearances./tv/tv_regular_personal_appearance/program	/m/03fwln	0
/m/02vy5j	/people/person/spouse_s./people/marriage/spouse	/m/02g0rb	1
/m/0l38x	/film/film/personal_appearances./film/personal_film_appearance/person	/m/056878	0
/m/04l19_	/film/actor/film./film/performance/film	/m/043tz0c	1
/m/0dtw1x	/people/person/sibling_s./people/sibling_relationship/sibling	/m/092c5f	0
/m/01z_g6	/award/award_nominee/award_nominations./award/award_nomination/award_nominee	/m/03kcyd	1
/m/0f94t	/location/administrative_division/first_level_division_of	/m/0dt_q_	0
/m/06jnvs	/award/award_nominee/award_nominations./award/award_nomination/award_nominee	/m/0bczgm	1
/m/04xhwn	/people/profession/specialization_of	/m/01wxdn3	0
/m/0bg539	/award/award_nominee/award_nominations./award/award_nomination/award	/m/0cjyzs	1
/m/0863x_	/award/award_winning_work/awards_won./award/award_honor/honored_for	/m/0jmgb	0
/m/01lj_c	/award/award_category/winners./award/award_honor/ceremony	/m/0ds460j	1
/m/0bxjv	/sports/sports_team/colors	/m/02ht1k	0
/m/07c0j	/award/award_nominee/award_nominations./award/award_nomination/award	/m/03qbnj	1
/m/01ry0f	/sports/sports_team_location/teams	/m/01k1k4	0
/m/02_j1w	/sports/sports_position/players./sports/sports_team_roster/team	/m/09xb4h	1
/m/01csrl	/location/statistical_region/religions./location/religion_percentage/religion	/m/0yx7h	0
/m/01v9l67	/award/award_nominee/award_nominations./award/award_nomination/nominated_for	/m/017gm7	1
/m/031c2r	/music/performance_role/regular_performances./music/group_membership/role	/m/0fpj4lx	0
/m/03sbs	/user/alexander/philosophy/philosopher/interests	/m/04s0m	1
/m/05kj_	/education/university/fraternities_and_sororities	/m/01sb5r	0
/m/017vkx	/people/person/profession	/m/09jwl	1
/m/01pnn3	/award/award_winning_work/awards_won./award/award_honor/award_winner	/m/056rgc	0
/m/03n69x	/sports/pro_athlete/teams./sports/sports_team_roster/team	/m/0cqt41	1
/m/0py8j	/people/ethnicity/languages_spoken	/m/0mzj_	0
/m/043vc	/sports/sports_team/roster./american_football/football_historical_roster_position/position_s	/m/02g_6j	1
/m/01vrt_c	/location/country/second_level_divisions	/m/01vj9c	0
/m/02x4w6g	/award/award_category/winners./award/award_honor/award_winner	/m/026r8q	1
/m/07z6xs	/people/person/employment_history./business/employment_tenure/company	/m/05j49	0
/m/0275_pj	/award/award_nominee/award_nominations./award/award_nomination/award_nominee	/m/070w7s	1
/m/03yk8z	/olympics/olympic_participating_country/medals_won./olympics/olympic_medal_honor/olympics	/m/01f7v_	0
/m/017s11	/film/film_distributor/films_distributed./film/film_film_distributor_relationship/film	/m/04cv9m	1
/m/0gxmj	/education/educational_institution/school_type	/m/05397h	0
/m/031y07	/award/award_nominee/award_nominations./award/award_nomination/nominated_for	/m/02bg8v	1
/m/02bp37	/film/film/genre	/m/0gmgwnv	0
/m/0c6g1l	/award/award_nominee/award_nominations./award/award_nomination/award_nominee	/m/024n3z	1
/m/092c5f	/film/film/featured_film_locations	/m/02vxyl5	0
/m/026t6	/music/performance_role/track_performances./music/track_contribution/role	/m/01bns_	1
/m/05jx17	/time/event/locations	/m/0hkwr	0
/m/0bl3nn	/film/film/genre	/m/01hmnh	1
/m/04k8n	/film/film/prequel	/m/04yj5z	0
/m/05yjhm	/people/person/places_lived./people/place_lived/location	/m/013h9	1
/m/01fscv	/location/administrative_division/country	/m/04pwg	0
/m/04lhc4	/award/award_nominated_work/award_nominations./award/award_nomination/nominated_for	/m/09cr8	1
/m/0qpsn	/soccer/football_player/current_team./sports/sports_team_roster/team	/m/08959	0
/m/03ym1	/film/actor/film./film/performance/film	/m/01qb5d	1
/m/06nv27	/language/human_language/countries_spoken_in	/m/0f4vx	0
/m/075mb	/base/aareas/schema/administrative_area/administrative_parent	/m/05sb1	1
/m/01vmv_	/people/person/nationality	/m/09ld6g	0
/m/0vhm	/tv/tv_program/program_creator	/m/09b0xs	1
/m/02qssrm	/location/statistical_region/places_exported_to./location/imports_and_exports/exported_to	/m/0c6g29	0
/m/035zr0	/film/film/music	/m/0l12d	1
/m/09kr66	/award/award_category/winners./award/award_honor/award_winner	/m/05511w	0
/m/0jpn8	/education/university/fraternities_and_sororities	/m/035tlh	1
/m/01nxfc	/award/hall_of_fame/inductees./award/hall_of_fame_induction/inductee	/m/02qr69m	0
/m/011j5x	/music/genre/artists	/m/014pg1	1
/m/01vg13	/medicine/symptom/symptom_of	/m/0gt14	0
/m/0bjrnt	/education/educational_degree/people_with_this_degree./education/education/institution	/m/08815	1
/m/0l8g0	/olympics/olympic_games/sports	/m/05j49	0
/m/07s95_l	/award/award_winner/awards_won./award/award_honor/award_winner	/m/04kr63w	1
/m/03k0yw	/base/x2010fifaworldcupsouthafrica/world_cup_squad/current_world_cup_squad./base/x2010fifaworldcupsouthafrica/current_world_cup_squad/current_club	/m/05dss7	0
/m/01xllf	/film/actor/film./film/performance/film	/m/0ds5_72	1
/m/09dv0sz	/location/location/partially_contains	/m/02qhlm	0
/m/03yk8z	/award/award_nominee/award_nominations./award/award_nomination/nominated_for	/m/09gq0x5	1
/m/01vt5c_	/film/film/language	/m/07hgkd	0
/m/026t6	/music/instrument/instrumentalists	/m/01wp8w7	1
/m/015zyd	/education/educational_institution/colors	/m/0dt_q_	0
/m/015l4k	/user/jg/default_domain/olympic_games/sports	/m/06zgc	1
/m/0gt14	/base/popstra/celebrity/dated./base/popstra/dated/participant	/m/0l38x	0
/m/0ds1glg	/film/film/release_date_s./film/film_regional_release_date/film_release_region	/m/03rt9	1
/m/01_gv	/organization/organization/place_founded	/m/05bmq	0
/m/02fv3t	/award/award_category/winners./award/award_honor/ceremony	/m/056878	1
/m/0fq9zdn	/film/film/production_companies	/m/0gh65c5	0
/m/03mkk4	/education/educational_degree/people_with_this_degree./education/education/major_field_of_study	/m/05qdh	1
/m/02vm9nd	/influence/influence_node/influenced_by	/m/01wdqrx	0
/m/0fq27fp	/film/film/release_date_s./film/film_regional_release_date/film_release_region	/m/0345h	1
/m/06b19	/soccer/football_team/current_roster./sports/sports_team_roster/position	/m/0jz71	0
/m/04jwly	/award/award_winning_work/awards_won./award/award_honor/award_winner	/m/02d4ct	1
/m/0345_	/tv/tv_program/program_creator	/m/04jlgp	0
/m/0glt670	/music/genre/artists	/m/0bqsy	1
/m/0cc1v	/award/award_ceremony/awards_presented./award/award_honor/honored_for	/m/03__y	0
/m/04rsd2	/award/award_nominee/award_nominations./award/award_nomination/award_nominee	/m/0159h6	1
/m/0284h6	/music/artist/track_contributions./music/track_contribution/role	/m/02sjf5	0
/m/0lkr7	/award/award_nominee/award_nominations./award/award_nomination/award	/m/0gqy2	1
/m/0kv5t	/influence/influence_node/peers./influence/peer_relationship/peers	/m/0jgwf	0
/m/03bx0bm	/music/performance_role/regular_performances./music/group_membership/role	/m/02fsn	1
/m/0432cd	/music/group_member/membership./music/group_membership/group	/m/06n3y	0
/m/02j3d4	/award/award_winner/awards_won./award/award_honor/award_winner	/m/02cx90	1
/m/03_wm6	/location/country/official_language	/m/0dl9_4	0
/m/0dwt5	/music/performance_role/track_performances./music/track_contribution/role	/m/01vj9c	1
/m/0c4f4	/location/statistical_region/religions./location/religion_percentage/religion	/m/02nd_	0
/m/02g_6j	/sports/sports_position/players./sports/sports_team_roster/team	/m/0ws7	1
/m/0ct2tf5	/sports/pro_athlete/teams./sports/sports_team_roster/team	/m/05c5xx9	0
/m/06vsbt	/people/person/places_lived./people/place_lived/location	/m/0fpzwf	1
/m/02m3sd	/film/film/edited_by	/m/01vj9c	0
/m/01dy7j	/award/award_nominee/award_nominations./award/award_nomination/nominated_for	/m/0d68qy	1
/m/03_wtr	/film/film/genre	/m/0fm6m8	0
/m/0cjsxp	/award/award_nominee/award_nominations./award/award_nomination/award	/m/02x4w6g	1
/m/041sbd	/people/person/spouse_s./people/marriage/location_of_ceremony	/m/01vmv_	0
/m/03sbs	/user/alexander/philosophy/philosopher/interests	/m/0x0w	1
/m/02z1nbg	/location/administrative_division/country	/m/04_bfq	0
/m/06hzsx	/people/person/profession	/m/0dgd_	1
/m/09d5h	/soccer/football_team/current_roster./soccer/football_roster_position/position	/m/0418154	0
/m/032j_n	/film/film_distributor/films_distributed./film/film_film_distributor_relationship/film	/m/0bwhdbl	1
/m/02lbrd	/people/cause_of_death/people	/m/03_9r	0
/m/02pt6k_	/award/award_winner/awards_won./award/award_honor/award_winner	/m/02qssrm	1
/m/04k8n	/business/business_operation/industry	/m/02z1nbg	0
/m/05kjc6	/soccer/football_team/current_roster./soccer/football_roster_position/position	/m/02_j1w	1
/m/08959	/award/award_winning_work/awards_won./award/award_honor/honored_for	/m/0yx7h	0
/m/05ns4g	/soccer/football_team/current_roster./soccer/football_roster_position/position	/m/02_j1w	1
/m/0nz_b	/award/award_ceremony/awards_presented./award/award_honor/honored_for	/m/04lc0h	0
/m/03bwzr4	/education/educational_degree/people_with_this_degree./education/education/institution	/m/015cz0	1
/m/084x96	/award/award_category/winners./award/award_honor/ceremony	/m/01cjhz	0
/m/029h7y	/music/genre/artists	/m/01vt5c_	1
/m/058z1hb	/location/hud_county_place/county	/m/01y998	0
/m/02x73k6	/award/award_category/nominees./award/award_nomination/nominated_for	/m/01chpn	1
/m/03g9xj	/education/field_of_study/students_majoring./education/education/major_field_of_study	/m/0dsb_yy	0
/m/011zf2	/award/award_winner/awards_won./award/award_honor/award_winner	/m/01m15br	1
/m/0hkwr	/award/award_category/nominees./award/award_nomination/nominated_for	/m/0cd25	0
/m/02_j1w	/sports/sports_position/players./sports/sports_team_roster/team	/m/0gfw56	1
/m/0fpj4lx	/film/film/edited_by	/m/01rnly	0
/m/02g3gw	/award/award_category/nominees./award/award_nomination/nominated_for	/m/01hv3t	1
/m/02vr3gz	/government/government_office_category/officeholders./government/government_position_held/jurisdiction_of_office	/m/034np8	0
/m/026t6	/music/instrument/instrumentalists	/m/06cc_1	1
/m/01gvxv	/olympics/olympic_sport/athletes./olympics/olympic_athlete_affiliation/olympics	/m/01w56k	0
/m/026t6	/music/performance_role/guest_performances./music/recording_contribution/performance_role	/m/02dlh2	1
/m/03_9r	/people/person/employment_history./business/employment_tenure/company	/m/0f5xn	0
/m/0h95927	/film/film/release_date_s./film/film_regional_release_date/film_release_region	/m/03gj2	1
/m/03c7ln	/tv/tv_network/programs./tv/tv_network_duration/program	/m/02sjf5	0
/m/0gq9h	/award/award_category/nominees./award/award_nomination/nominated_for	/m/0cq7kw	1
/m/07qy0b	/film/film/release_date_s./film/film_regional_release_date/film_regional_debut_venue	/m/04m064	0
/m/04969y	/award/award_winning_work/awards_won./award/award_honor/award	/m/03y8cbv	1
/m/03z0dt	/award/award_nominated_work/award_nominations./award/award_nomination/nominated_for	/m/0m4yg	0
/m/05nwr	/location/administrative_division/first_level_division_of	/m/06q1r	1
/m/09kr66	/base/x2010fifaworldcupsouthafrica/world_cup_squad/current_world_cup_squad./base/x2010fifaworldcupsouthafrica/current_world_cup_squad/current_club	/m/07kb7vh	0
/m/0jgwf	/award/award_nominee/award_nominations./award/award_nomination/nominated_for	/m/0glbqt	1
/m/01vtj38	/people/person/sibling_s./people/sibling_relationship/sibling	/m/02qhm3	0
/m/09fb5	/people/person/places_lived./people/place_lived/location	/m/0cc56	1
/m/0mwkp	/people/deceased_person/place_of_death	/m/0bjrnt	0
/m/024fz9	/award/award_category/winners./award/award_honor/award_winner	/m/03h_fk5	1
/m/04sj3	/music/artist/contribution./music/recording_contribution/performance_role	/m/02py4c8	0
/m/0164qt	/film/film/music	/m/02g1jh	1
/m/0fltx	/location/country/second_level_divisions	/m/02vxyl5	0
/m/02_j1w	/sports/sports_position/players./sports/sports_team_roster/team	/m/01352_	1
/m/017d77	/education/educational_degree/people_with_this_degree./education/education/institution	/m/0gsrz4	0
/m/0gtvrv3	/film/film/release_date_s./film/film_regional_release_date/film_release_region	/m/03rjj	1
/m/0f0p0	/sports/sports_position/players./sports/sports_team_roster/team	/m/02661h	0
/m/02dlh2	/music/instrument/family	/m/026t6	1
/m/01w56k	/tv/tv_network/programs./tv/tv_network_duration/program	/m/0dprg	0
/m/06cgf	/award/ranked_item/appears_in_ranked_lists./award/ranking/list	/m/05glt	1
/m/0275_pj	/award/award_ceremony/awards_presented./award/award_honor/honored_for	/m/02w86hz	0
/m/0557yqh	/tv/tv_program/genre	/m/0c4xc	1
/m/06zgc	/influence/influence_node/influenced_by	/m/0356gk	0
/m/02vxn	/education/field_of_study/students_majoring./education/education/major_field_of_study	/m/02822	1
/m/01hqk	/base/americancomedy/celebrity_impressionist/celebrities_impersonated	/m/01s5q	0
/m/0cmc2	/base/culturalevent/event/entity_involved	/m/01fmy9	1
/m/03n5v	/location/location/time_zones	/m/0gmblvq	0
/m/03z9585	/film/film/release_date_s./film/film_regional_release_date/film_release_region	/m/06mkj	1
/m/083skw	/base/schemastaging/organization_extra/phone_number./base/schemastaging/phone_sandbox/service_location	/m/0l38x	0
/m/0k7tq	/film/film/release_date_s./film/film_regional_release_date/film_release_region	/m/056_y	1
/m/03g9xj	/location/country/official_language	/m/021_rm	0
/m/057bc6m	/award/award_winner/awards_won./award/award_honor/award_winner	/m/076psv	1
/m/01fd26	/location/country/official_language	/m/045346	0
/m/02cx90	/award/award_winner/awards_won./award/award_honor/award_winner	/m/02j3d4	1
/m/0n59t	/film/film/personal_appearances./film/personal_film_appearance/person	/m/01qr1_	0
/m/02_j1w	/sports/sports_position/players./sports/sports_team_roster/team	/m/051qvn	1
/m/01f7v_	/education/university/fraternities_and_sororities	/m/01vsps	0
/m/023wyl	/sports/sports_position/players./sports/sports_team_roster/team	/m/07kbp5	1
/m/03yk8z	/business/business_operation/industry	/m/0k3hn	0
/m/03bwzr4	/education/educational_degree/people_with_this_degree./education/education/institution	/m/0gjv_	1
/m/092c5f	/education/educational_institution/school_type	/m/0459q4	0
/m/03bwzr4	/education/educational_degree/people_with_this_degree./education/education/institution	/m/03ksy	1
/m/04rsd2	/people/person/nationality	/m/0c3xw46	0
/m/0192hw	/film/film/featured_film_locations	/m/0qpn9	1
/m/0f40w	/award/award_nominated_work/award_nominations./award/award_nomination/nominated_for	/m/03ksy	0
/m/0275_pj	/award/award_winner/awards_won./award/award_honor/award_winner	/m/070w7s	1
/m/0t_71	/film/film/other_crew./film/film_crew_gig/film_crew_role	/m/0vhm	0
/m/01r216	/award/award_nominee/award_nominations./award/award_nomination/award_nominee	/m/02j8nx	1
/m/07xl34	/dataworld/gardening_hint/split_to	/m/0c3xw46	0
/m/09byk	/people/person/languages	/m/04306rv	1
/m/0gqfy	/people/person/sibling_s./people/sibling_relationship/sibling	/m/0bwhdbl	0
/m/0mwxz	/location/location/adjoin_s./location/adjoining_relationship/adjoins	/m/0mwh1	1
/m/04q01mn	/people/profession/specialization_of	/m/0517bc	0
/m/018x3	/award/award_nominee/award_nominations./award/award_nomination/award_nominee	/m/01wyq0w	1
/m/0345_	/location/administrative_division/first_level_division_of	/m/0n6bs	0
/m/0gr0m	/award/award_category/nominees./award/award_nomination/nominated_for	/m/07z6xs	1
/m/0j862	/soccer/football_team/current_roster./soccer/football_roster_position/position	/m/01y998	0
/m/017s11	/award/award_nominee/award_nominations./award/award_nomination/nominated_for	/m/0dc7hc	1
/m/0gtvrv3	/film/film/story_by	/m/02rb84n	0
/m/05pxnmb	/award/award_winning_work/awards_won./award/award_honor/honored_for	/m/0bxxzb	1
/m/01f8hf	/location/administrative_division/first_level_division_of	/m/0gqfy	0
/m/01vrt_c	/base/popstra/celebrity/dated./base/popstra/dated/participant	/m/0127s7	1
/m/06q07	/music/instrument/family	/m/026n998	0
/m/0ptxj	/film/film/produced_by	/m/03s2y9	1
/m/050ks	/soccer/football_player/current_team./sports/sports_team_roster/team	/m/03__77	0
/m/0gj8nq2	/film/film/release_date_s./film/film_regional_release_date/film_release_region	/m/03rjj	1
/m/047dpm0	/olympics/olympic_participating_country/athletes./olympics/olympic_athlete_affiliation/olympics	/m/01vmv_	0
/m/0dd6bf	/film/film/language	/m/03_9r	1
/m/01f_mw	/tv/tv_writer/tv_programs./tv/tv_program_writer_relationship/tv_program	/m/02jkkv	0
/m/026t6	/music/performance_role/track_performances./music/track_contribution/role	/m/0979zs	1
/m/024fz9	/organization/organization/headquarters./location/mailing_address/citytown	/m/02fsn	0
/m/016yvw	/people/person/nationality	/m/03rt9	1
/m/0ct9_	/location/administrative_division/country	/m/01w56k	0
/m/03mszl	/music/artist/contribution./music/recording_contribution/performance_role	/m/026t6	1
/m/02m3sd	/film/film/film_production_design_by	/m/09p4w8	0
/m/01_f_5	/award/award_nominee/award_nominations./award/award_nomination/award	/m/02x1dht	1
/m/0h0jz	/people/ethnicity/languages_spoken	/m/06rkfs	0
/m/034np8	/film/actor/film./film/performance/film	/m/0f40w	1
/m/02qggqc	/film/film/dubbing_performances./film/dubbing_performance/actor	/m/02s9vc	0
/m/01vw_dv	/people/person/profession	/m/0dz3r	1
/m/016zgj	/music/instrument/instrumentalists	/m/01tp5bj	0
/m/08vq2y	/soccer/football_team/current_roster./soccer/football_roster_position/position	/m/02_j1w	1
/m/0flw6	/people/person/sibling_s./people/sibling_relationship/sibling	/m/0n2sh	0
/m/05dbf	/base/popstra/celebrity/dated./base/popstra/dated/participant	/m/0lx2l	1
/m/06jvj7	/music/instrument/family	/m/06dfg	0
/m/04mhl	/people/person/profession	/m/0cbd2	1
/m/05p1tzf	/music/artist/origin	/m/024fz9	0
/m/03mkk4	/education/educational_degree/people_with_this_degree./education/education/major_field_of_study	/m/040p_q	1
/m/015rhv	/award/award_nominee/award_nominations./award/award_nomination/award_nominee	/m/03t5kl	0
/m/011yl_	/film/film/featured_film_locations	/m/04jpl	1
/m/08htt0	/base/americancomedy/celebrity_impressionist/celebrities_impersonated	/m/024mxd	0
/m/01gtcq	/government/legislative_session/members./government/government_position_held/district_represented	/m/026mj	1
/m/01423b	/award/award_category/winners./award/award_honor/award_winner	/m/0gv07g	0
/m/03fmfs	/education/educational_institution/colors	/m/01g5v	1
/m/01f8hf	/film/film/genre	/m/0cbkc	0
/m/0345h	/location/location/contains	/m/07gdw	1
/m/033smt	/olympics/olympic_participating_country/athletes./olympics/olympic_athlete_affiliation/olympics	/m/0hx4y	0
/m/07s95_l	/award/award_nominee/award_nominations./award/award_nomination/award_nominee	/m/04kr63w	1
/m/0j862	/film/film/prequel	/m/03g9xj	0
/m/0j_sncb	/education/educational_institution/students_graduates./education/education/major_field_of_study	/m/0fdys	1
/m/01grpq	/award/award_ceremony/awards_presented./award/award_honor/award_winner	/m/0gmgwnv	0
/m/014gjp	/award/award_winning_work/awards_won./award/award_honor/award_winner	/m/09d5h	1
/m/01dbhb	/base/biblioness/bibs_location/state	/m/03_wm6	0
/m/050ks	/location/statistical_region/religions./location/religion_percentage/religion	/m/072w0	1
/m/01j7pt	/music/record_label/artist	/m/0f6lx	0
/m/0bcp9b	/film/film/music	/m/01l3mk3	1
/m/0jtg0	/music/instrument/family	/m/0hkwr	0
/m/056rgc	/award/award_nominee/award_nominations./award/award_nomination/award	/m/02x4w6g	1
/m/0154fs	/influence/influence_node/influenced_by	/m/0py8j	0
/m/0c1d0	/location/capital_of_administrative_division/capital_of./location/administrative_division_capital_relationship/administrative_division	/m/0mw5x	1
/m/04jlgp	/influence/influence_node/influenced_by	/m/03k3b	0
/m/02xb2bt	/people/person/nationality	/m/03rt9	1
/m/0_nh2	/film/film/other_crew./film/film_crew_gig/crewmember	/m/01vvzb1	0
/m/04j_h4	/music/genre/parent_genre	/m/0glt670	1
/m/01wgjj5	/music/instrument/family	/m/06zgc	0
/m/0159h6	/award/award_nominee/award_nominations./award/award_nomination/nominated_for	/m/02py4c8	1
/m/0154fs	/award/hall_of_fame/inductees./award/hall_of_fame_induction/inductee	/m/0dlhg	0
/m/0glt670	/music/genre/artists	/m/01vw_dv	1
/m/02ddq4	/award/award_ceremony/awards_presented./award/award_honor/honored_for	/m/0gq9h	0
/m/017s11	/award/award_nominee/award_nominations./award/award_nomination/nominated_for	/m/0bxxzb	1
/m/02_hj4	/medicine/disease/notable_people_with_this_condition	/m/05qbbfb	0
/m/0fq9zdn	/award/award_category/winners./award/award_honor/award_winner	/m/02d42t	1
/m/0dt_q_	/tv/tv_network/programs./tv/tv_network_duration/program	/m/09dv0sz	0
/m/01vksx	/film/film/release_date_s./film/film_regional_release_date/film_release_region	/m/06mkj	1
/m/05bmq	/government/political_party/politicians_in_this_party./government/political_party_tenure/politician	/m/02ht1k	0
/m/019f4v	/award/award_category/nominees./award/award_nomination/nominated_for	/m/09p3_s	1
/m/078lk	/user/alexander/philosophy/philosopher/interests	/m/0cbd2	0
/m/017s11	/award/award_nominee/award_nominations./award/award_nomination/nominated_for	/m/02hxhz	1
/m/028d4v	/tv/tv_network/programs./tv/tv_network_duration/program	/m/03t5kl	0
/m/07c0j	/award/award_nominee/award_nominations./award/award_nomination/award	/m/01c9jp	1
/m/0fvzz	/sports/sports_team/colors	/m/0gthm	0
/m/06q1r	/location/statistical_region/places_exported_to./location/imports_and_exports/exported_to	/m/03rjj	1
/m/033smt	/military/military_conflict/combatants./military/military_combatant_group/combatants	/m/014gjp	0
/m/07h1q	/influence/influence_node/influenced_by	/m/04xm_	1
/m/0345h	/music/artist/track_contributions./music/track_contribution/role	/m/04jpl	0
/m/0grwj	/people/person/profession	/m/0cbd2	1
/m/0345_	/base/popstra/celebrity/dated./base/popstra/dated/participant	/m/0d2by	0
/m/02vkvcz	/people/deceased_person/place_of_death	/m/04jpl	1
/m/08lg0g	/people/person/religion	/m/04l19_	0
/m/0gq_v	/award/award_category/winners./award/award_honor/ceremony	/m/0bzmt8	1
/m/01r_t_	/education/educational_degree/people_with_this_degree./education/education/institution	/m/07nt8p	0
/m/0d500h	/award/award_nominee/award_nominations./award/award_nomination/nominated_for	/m/04jwly	1
/m/0fm6m8	/tv/tv_program/genre	/m/0cnl1c	0
/m/03_wtr	/award/award_winner/awards_won./award/award_honor/award_winner	/m/03_wvl	1
/m/03h_f4	/location/location/time_zones	/m/0gxmj	0
/m/07nf6	/location/location/adjoin_s./location/adjoining_relationship/adjoins	/m/09krp	1
/m/0fq9zdn	/time/event/locations	/m/06wxw	0
/m/0ct2tf5	/film/film/other_crew./film/film_crew_gig/film_crew_role	/m/02_n3z	1
/m/0mwh1	/music/group_member/membership./music/group_membership/role	/m/0dbpwb	0
/m/05hyn5	/soccer/football_team/current_roster./soccer/football_roster_position/position	/m/02_j1w	1
/m/013t9y	/award/award_category/disciplines_or_subjects	/m/0208wk	0
/m/0nk72	/user/alexander/philosophy/philosopher/interests	/m/04s0m	1
/m/03fts	/people/ethnicity/geographic_distribution	/m/0ddjy	0
/m/08815	/education/educational_institution/students_graduates./education/education/major_field_of_study	/m/01zc2w	1
/m/0jz71	/film/film/release_date_s./film/film_regional_release_date/film_release_region	/m/0517bc	0
/m/015pxr	/award/award_winner/awards_won./award/award_honor/award_winner	/m/0bczgm	1
/m/01vmv_	/film/actor/film./film/performance/film	/m/0gqfy	0
/m/04wvhz	/award/award_nominee/award_nominations./award/award_nomination/award_nominee	/m/07lwsz	1
/m/03078l	/media_common/netflix_genre/titles	/m/05f0r8	0
/m/0dx8gj	/film/film/genre	/m/082gq	1
/m/06cc_1	/sports/sports_team/roster./american_football/football_historical_roster_position/position_s	/m/07hgkd	0
/m/0cjyzs	/award/award_category/nominees./award/award_nomination/nominated_for	/m/014gjp	1
/m/0h326	/music/performance_role/regular_performances./music/group_membership/group	/m/0f6lx	0
/m/034487	/music/genre/artists	/m/01k_yf	1
/m/02d4ct	/base/popstra/celebrity/canoodled./base/popstra/canoodled/participant	/m/01c9jp	0
/m/02rb607	/film/film/country	/m/0345h	1
/m/02j3d4	/education/university/fraternities_and_sororities	/m/067x44	0
/m/0cjsxp	/award/award_winner/awards_won./award/award_honor/award_winner	/m/02tr7d	1
/m/0bt7w	/film/film/costume_design_by	/m/03k0yw	0
/m/06mkj	/olympics/olympic_participating_country/athletes./olympics/olympic_athlete_affiliation/olympics	/m/0kbvv	1
/m/07qy0b	/olympics/olympic_participating_country/medals_won./olympics/olympic_medal_honor/olympics	/m/01s3kv	0
