# Supplementary material
Source: ML conference proceedings conference paper supplement (https://proceedings.neurips.cc/paper_files/paper/2021/hash/0fd600c953cde8121262e322ef09f70e-Abstract.html)
Supplement: Supplementary file 1 [file 0fd600c953cde8121262e322ef09f70e-Supplemental.zip › Supplementary_Material_Paper_8745/data/GraIL-BM_fb237_v2/train/train.txt]

/m/0dq3c	/government/government_office_category/officeholders./government/government_position_held/jurisdiction_of_office	/m/06qd3
/m/01h910	/people/person/spouse_s./people/marriage/type_of_union	/m/04ztj
/m/07s9rl0	/media_common/netflix_genre/titles	/m/0gnkb
/m/06g2d1	/award/award_nominee/award_nominations./award/award_nomination/award_nominee	/m/0blbxk
/m/06cv1	/people/person/spouse_s./people/marriage/type_of_union	/m/04ztj
/m/01d8l	/military/military_combatant/military_conflicts./military/military_combatant_group/combatants	/m/0f8l9c
/m/047gpsd	/film/film/other_crew./film/film_crew_gig/crewmember	/m/051z6rz
/m/04rqd	/broadcast/content/artist	/m/06mj4
/m/02gyl0	/people/person/nationality	/m/0h7x
/m/03nnm4t	/award/award_ceremony/awards_presented./award/award_honor/award_winner	/m/0cp9f9
/m/0d8h4	/location/location/adjoin_s./location/adjoining_relationship/adjoins	/m/0154j
/m/0154qm	/award/award_nominee/award_nominations./award/award_nomination/award_nominee	/m/073w14
/m/02l4pj	/film/actor/film./film/performance/film	/m/033qdy
/m/01vrlr4	/award/award_nominee/award_nominations./award/award_nomination/award_nominee	/m/01vrlqd
/m/0824r	/location/location/contains	/m/013nws
/m/0btbyn	/film/film/language	/m/02h40lc
/m/026c0p	/people/person/profession	/m/0np9r
/m/01xdf5	/people/person/gender	/m/05zppz
/m/013qvn	/people/person/spouse_s./people/marriage/type_of_union	/m/04ztj
/m/031786	/film/film/genre	/m/02n4kr
/m/05h43ls	/film/film/production_companies	/m/046b0s
/m/0557q	/music/genre/artists	/m/02cx72
/m/02l4pj	/award/award_winner/awards_won./award/award_honor/award_winner	/m/01qqtr
/m/018s6c	/people/ethnicity/people	/m/012bk
/m/01vdm0	/music/performance_role/regular_performances./music/group_membership/role	/m/0l14md
/m/0yzvw	/film/film/genre	/m/07s9rl0
/m/0g9wdmc	/film/film/country	/m/0f8l9c
/m/03fn16	/soccer/football_team/current_roster./sports/sports_team_roster/position	/m/0dgrmp
/m/034qg	/people/cause_of_death/people	/m/04xfb
/m/03j367r	/award/award_nominee/award_nominations./award/award_nomination/award	/m/09sb52
/m/0ym17	/education/educational_institution/students_graduates./education/education/major_field_of_study	/m/0db86
/m/0m66w	/award/award_nominee/award_nominations./award/award_nomination/award	/m/0cqhk0
/m/0d3qd0	/people/person/places_lived./people/place_lived/location	/m/05k7sb
/m/02wtp6	/film/film/other_crew./film/film_crew_gig/film_crew_role	/m/0ch6mp2
/m/09sb52	/award/award_category/nominees./award/award_nomination/nominated_for	/m/03s9kp
/m/07rzf	/people/person/profession	/m/0np9r
/m/032sl_	/film/film/genre	/m/07s9rl0
/m/0l2rj	/location/location/contains	/m/0r4wn
/m/05c46y6	/film/film/language	/m/02h40lc
/m/0484q	/people/person/profession	/m/0n1h
/m/03cz83	/education/university/fraternities_and_sororities	/m/04m8fy
/m/027jq2	/people/person/gender	/m/05zppz
/m/01nfys	/award/award_winner/awards_won./award/award_honor/award_winner	/m/01z7_f
/m/040njc	/award/award_category/nominees./award/award_nomination/nominated_for	/m/0ccck7
/m/01nn79	/organization/organization/headquarters./location/mailing_address/state_province_region	/m/01vsb_
/m/03yrkt	/award/award_nominee/award_nominations./award/award_nomination/award_nominee	/m/0gx_p
/m/01713c	/award/award_nominee/award_nominations./award/award_nomination/award	/m/04kxsb
/m/01ckhj	/film/actor/film./film/performance/film	/m/0bv8h2
/m/01z7_f	/award/award_nominee/award_nominations./award/award_nomination/award_nominee	/m/02lg3y
/m/01c40n	/base/biblioness/bibs_location/state	/m/01n7q
/m/01v3s2_	/people/person/place_of_birth	/m/0yx74
/m/09x8ms	/people/person/gender	/m/05zppz
/m/027_sn	/people/person/profession	/m/0n1h
/m/084302	/film/film/genre	/m/07s9rl0
/m/0bwjj	/sports/sports_team/colors	/m/038hg
/m/0b_dy	/award/award_nominee/award_nominations./award/award_nomination/nominated_for	/m/027pfg
/m/03xgm3	/people/person/profession	/m/08z956
/m/03q43g	/people/person/spouse_s./people/marriage/type_of_union	/m/04ztj
/m/021mlp	/film/actor/film./film/performance/film	/m/0bykpk
/m/065ym0c	/film/film/country	/m/0d05w3
/m/027pfg	/film/film/release_date_s./film/film_regional_release_date/film_release_region	/m/0f8l9c
/m/0jsqk	/film/film/produced_by	/m/0gv40
/m/0dgrmp	/sports/sports_position/players./sports/sports_team_roster/team	/m/06z9f8
/m/01242_	/film/film/genre	/m/02l7c8
/m/05k7sb	/location/location/contains	/m/0t_48
/m/01mqnr	/award/award_nominee/award_nominations./award/award_nomination/award	/m/09qvc0
/m/040njc	/award/award_category/nominees./award/award_nomination/nominated_for	/m/026p4q7
/m/0cqhk0	/award/award_category/winners./award/award_honor/award_winner	/m/05lb30
/m/0dgrmp	/sports/sports_position/players./sports/sports_team_roster/team	/m/02b0zt
/m/02825nf	/film/film/other_crew./film/film_crew_gig/film_crew_role	/m/09vw2b7
/m/014mlp	/education/educational_degree/people_with_this_degree./education/education/institution	/m/01jsk6
/m/025hzx	/people/person/spouse_s./people/marriage/type_of_union	/m/04ztj
/m/05p09zm	/award/award_category/nominees./award/award_nomination/nominated_for	/m/02p76f9
/m/01ry_x	/film/film/language	/m/064_8sq
/m/016gkf	/award/award_nominee/award_nominations./award/award_nomination/award	/m/0789_m
/m/03rk0	/location/location/contains	/m/01c1nm
/m/0163zw	/music/genre/artists	/m/01fchy
/m/04dqdk	/people/person/nationality	/m/0f8l9c
/m/03j149k	/people/person/place_of_birth	/m/02zp1t
/m/02ylg6	/film/film/cinematography	/m/02vx4c2
/m/0d0vqn	/olympics/olympic_participating_country/athletes./olympics/olympic_athlete_affiliation/olympics	/m/0jhn7
/m/054krc	/award/award_category/winners./award/award_honor/award_winner	/m/01271h
/m/09sb52	/award/award_category/winners./award/award_honor/award_winner	/m/0755wz
/m/0b6f8pf	/film/film/other_crew./film/film_crew_gig/film_crew_role	/m/01pvkk
/m/019f2f	/award/award_nominee/award_nominations./award/award_nomination/award	/m/0bfvw2
/m/02tgz4	/film/film/other_crew./film/film_crew_gig/film_crew_role	/m/089fss
/m/0171lb	/people/person/profession	/m/0dxtg
/m/0gs96	/award/award_category/nominees./award/award_nomination/nominated_for	/m/011ywj
/m/02y_lrp	/film/film/produced_by	/m/04q5zw
/m/0154qm	/people/person/spouse_s./people/marriage/type_of_union	/m/04ztj
/m/08_vwq	/award/award_category/winners./award/award_honor/award_winner	/m/03h_9lg
/m/01w02sy	/people/person/profession	/m/039v1
/m/0bqdvt	/award/award_nominee/award_nominations./award/award_nomination/award_nominee	/m/02wgln
/m/0d8lm	/music/performance_role/guest_performances./music/recording_contribution/performance_role	/m/0l14md
/m/04wp3s	/award/award_nominee/award_nominations./award/award_nomination/award_nominee	/m/071ywj
/m/0l15f_	/music/performance_role/track_performances./music/track_contribution/role	/m/03qlv7
/m/01vw20h	/award/award_winner/awards_won./award/award_honor/award_winner	/m/05mxw33
/m/051q39	/people/person/gender	/m/05zppz
/m/0x67	/people/ethnicity/people	/m/02h9_l
/m/02rdxsh	/award/award_category/nominees./award/award_nomination/nominated_for	/m/0qmfz
/m/02qdymm	/people/deceased_person/place_of_death	/m/0281rp
/m/01fbr2	/music/genre/artists	/m/02pzc4
/m/0cqhk0	/award/award_category/winners./award/award_honor/award_winner	/m/083chw
/m/01tw31	/people/person/profession	/m/039v1
/m/02zbjwr	/soccer/football_player/current_team./sports/sports_team_roster/team	/m/0425gc
/m/04dqdk	/award/award_nominee/award_nominations./award/award_nomination/award_nominee	/m/02qlg7s
/m/01c9d1	/award/award_category/winners./award/award_honor/ceremony	/m/019bk0
/m/03qnc6q	/film/film/release_date_s./film/film_regional_release_date/film_release_region	/m/0h7x
/m/01rr_d	/education/educational_degree/people_with_this_degree./education/education/institution	/m/01n951
/m/030znt	/award/award_winner/awards_won./award/award_honor/award_winner	/m/014v6f
/m/015g_7	/celebrities/celebrity/sexual_relationships./celebrities/romantic_relationship/celebrity	/m/01wrcxr
/m/0kv238	/film/film/language	/m/02h40lc
/m/02607j	/education/educational_institution/students_graduates./education/education/student	/m/02ch1w
/m/0gd92	/film/film/genre	/m/07s9rl0
/m/02m92h	/award/award_winner/awards_won./award/award_honor/award_winner	/m/0mdqp
/m/01kff7	/award/award_winning_work/awards_won./award/award_honor/award_winner	/m/01qg7c
/m/0fq7dv_	/film/film/release_date_s./film/film_regional_release_date/film_release_region	/m/06npd
/m/014gf8	/award/award_nominee/award_nominations./award/award_nomination/award	/m/09sb52
/m/0gkz15s	/film/film/release_date_s./film/film_regional_release_date/film_release_region	/m/06qd3
/m/059_c	/location/statistical_region/religions./location/religion_percentage/religion	/m/0631_
/m/054ky1	/award/award_category/winners./award/award_honor/award_winner	/m/01v5h
/m/01n7q	/location/location/contains	/m/0kpzy
/m/0fpzt5	/people/person/places_lived./people/place_lived/location	/m/0kcw2
/m/023kzp	/award/award_nominee/award_nominations./award/award_nomination/award_nominee	/m/014gf8
/m/07jbh	/olympics/olympic_sport/athletes./olympics/olympic_athlete_affiliation/country	/m/06npd
/m/02bqvs	/film/film/production_companies	/m/016tt2
/m/07j8r	/film/film/language	/m/01wgr
/m/02_xgp2	/education/educational_degree/people_with_this_degree./education/education/institution	/m/0bqxw
/m/07rzf	/people/person/gender	/m/05zppz
/m/01kstn9	/award/award_winner/awards_won./award/award_honor/award_winner	/m/0jdhp
/m/01hww_	/music/performance_role/track_performances./music/track_contribution/role	/m/014zz1
/m/01kwh5j	/people/person/profession	/m/0np9r
/m/05qbckf	/film/film/other_crew./film/film_crew_gig/crewmember	/m/0b6mgp_
/m/016tt2	/organization/organization/headquarters./location/mailing_address/state_province_region	/m/01n7q
/m/0blbxk	/award/award_nominee/award_nominations./award/award_nomination/nominated_for	/m/026p4q7
/m/09fn1w	/film/film/estimated_budget./measurement_unit/dated_money_value/currency	/m/02gsvk
/m/07s9rl0	/media_common/netflix_genre/titles	/m/0170xl
/m/07jqjx	/film/film/release_date_s./film/film_regional_release_date/film_release_region	/m/0d0vqn
/m/03ts0c	/people/ethnicity/languages_spoken	/m/064_8sq
/m/090s_0	/film/film/language	/m/02h40lc
/m/0cwrr	/tv/tv_program/regular_cast./tv/regular_tv_appearance/actor	/m/01vy_v8
/m/036gdw	/people/person/languages	/m/02h40lc
/m/06t74h	/award/award_nominee/award_nominations./award/award_nomination/award_nominee	/m/02p65p
/m/03s2dj	/people/person/place_of_birth	/m/01n7rc
/m/07s9rl0	/media_common/netflix_genre/titles	/m/05jyb2
/m/05842k	/music/performance_role/track_performances./music/track_contribution/role	/m/0g2ff
/m/01xvb	/sports/sports_team/roster./american_football/football_historical_roster_position/position_s	/m/0b13yt
/m/03cglm	/award/award_nominee/award_nominations./award/award_nomination/award	/m/09sb52
/m/03ryks	/music/artist/track_contributions./music/track_contribution/role	/m/01xqw
/m/03hp2y1	/film/film/genre	/m/03bxz7
/m/0ccd3x	/film/film/genre	/m/04t36
/m/03cs_z7	/tv/tv_writer/tv_programs./tv/tv_program_writer_relationship/tv_program	/m/07zhjj
/m/02qwgk	/education/university/domestic_tuition./measurement_unit/dated_money_value/currency	/m/0ptk_
/m/015g_7	/people/person/gender	/m/05zppz
/m/05sy_5	/film/film/film_format	/m/07fb8_
/m/02cttt	/education/educational_institution/students_graduates./education/education/student	/m/0b1f49
/m/016ks5	/film/film/music	/m/01ycfv
/m/0bx8pn	/education/educational_institution/students_graduates./education/education/major_field_of_study	/m/0g26h
/m/019pm_	/award/award_nominee/award_nominations./award/award_nomination/award_nominee	/m/014gf8
/m/02v8kmz	/film/film/genre	/m/07s9rl0
/m/08gwzt	/people/person/gender	/m/05zppz
/m/01l4g5	/music/artist/track_contributions./music/track_contribution/role	/m/05842k
/m/0sxns	/film/film/genre	/m/07s9rl0
/m/014mlp	/education/educational_degree/people_with_this_degree./education/education/institution	/m/01dbns
/m/02z6fs	/organization/organization/headquarters./location/mailing_address/state_province_region	/m/07c98
/m/0259r0	/people/person/profession	/m/0n1h
/m/0b76d_m	/film/film/release_date_s./film/film_regional_release_date/film_release_region	/m/04gzd
/m/01vttb9	/award/award_winner/awards_won./award/award_honor/award_winner	/m/02ryx0
/m/0gkz15s	/film/film/release_date_s./film/film_regional_release_date/film_release_region	/m/06t2t
/m/048wrb	/award/award_winner/awards_won./award/award_honor/award_winner	/m/027cxsm
/m/0gkd1	/music/performance_role/track_performances./music/track_contribution/role	/m/01vdm0
/m/01ry_x	/film/film/genre	/m/04t36
/m/01rwcgb	/people/person/spouse_s./people/marriage/type_of_union	/m/04ztj
/m/0l14md	/music/performance_role/regular_performances./music/group_membership/role	/m/07brj
/m/054krc	/award/award_category/nominees./award/award_nomination/nominated_for	/m/023cjg
/m/014j1m	/food/food/nutrients./food/nutrition_fact/nutrient	/m/02y_3rf
/m/03p2xc	/film/film/genre	/m/07s9rl0
/m/011ysn	/film/film/language	/m/02h40lc
/m/01g969	/award/award_nominee/award_nominations./award/award_nomination/award_nominee	/m/0127m7
/m/02q0k7v	/film/film/language	/m/02h40lc
/m/07s9rl0	/media_common/netflix_genre/titles	/m/04smdd
/m/02mjs7	/education/educational_degree/people_with_this_degree./education/education/institution	/m/07tds
/m/014mlp	/education/educational_degree/people_with_this_degree./education/education/institution	/m/01n4w_
/m/06ryl	/olympics/olympic_participating_country/athletes./olympics/olympic_athlete_affiliation/olympics	/m/06sks6
/m/03xq0f	/film/film_distributor/films_distributed./film/film_film_distributor_relationship/film	/m/026p4q7
/m/0r1yc	/location/hud_county_place/county	/m/0l2lk
/m/02ch1w	/award/award_nominee/award_nominations./award/award_nomination/award	/m/09sb52
/m/01gg59	/people/person/spouse_s./people/marriage/type_of_union	/m/04ztj
/m/01kff7	/film/film/genre	/m/0556j8
/m/05_5rjx	/film/film/language	/m/064_8sq
/m/019fz	/influence/influence_node/peers./influence/peer_relationship/peers	/m/026lj
/m/040njc	/award/award_category/nominees./award/award_nomination/nominated_for	/m/05hjnw
/m/02nx2k	/film/film/language	/m/02h40lc
/m/023361	/people/deceased_person/place_of_death	/m/0k049
/m/02h40lc	/language/human_language/countries_spoken_in	/m/035dk
/m/019_1h	/film/actor/film./film/performance/film	/m/090s_0
/m/0147dk	/award/award_nominee/award_nominations./award/award_nomination/award_nominee	/m/027kmrb
/m/028tv0	/music/performance_role/regular_performances./music/group_membership/group	/m/01_wfj
/m/05h43ls	/award/award_winning_work/awards_won./award/award_honor/award_winner	/m/0m66w
/m/02qgqt	/award/award_winner/awards_won./award/award_honor/award_winner	/m/03zg2x
/m/01n7q	/location/location/contains	/m/0q_0z
/m/03s9b	/film/actor/film./film/performance/film	/m/011yxy
/m/05bnq3j	/award/award_nominee/award_nominations./award/award_nomination/award_nominee	/m/01xdf5
/m/09v478h	/award/award_category/nominees./award/award_nomination/nominated_for	/m/0gl02yg
/m/025m8y	/award/award_category/winners./award/award_honor/award_winner	/m/015_30
/m/017r2	/people/person/profession	/m/05z96
/m/09qwmm	/award/award_category/nominees./award/award_nomination/nominated_for	/m/04gp58p
/m/01fxck	/people/person/places_lived./people/place_lived/location	/m/019fh
/m/06msq2	/award/award_winner/awards_won./award/award_honor/award_winner	/m/05bnq3j
/m/04j13sx	/film/film/language	/m/02h40lc
/m/02py7pj	/award/award_category/winners./award/award_honor/award_winner	/m/01y8cr
/m/0147dk	/people/person/religion	/m/01lp8
/m/06rvn	/music/performance_role/guest_performances./music/recording_contribution/performance_role	/m/0l14md
/m/03m9c8	/award/award_nominee/award_nominations./award/award_nomination/award_nominee	/m/07h07
/m/01grmk	/government/legislative_session/members./government/government_position_held/district_represented	/m/05k7sb
/m/04ktcgn	/award/award_nominee/award_nominations./award/award_nomination/award_nominee	/m/0b6mgp_
/m/02sh8y	/people/person/languages	/m/02h40lc
/m/071ywj	/award/award_nominee/award_nominations./award/award_nomination/award	/m/09sb52
/m/040njc	/award/award_category/nominees./award/award_nomination/nominated_for	/m/011yph
/m/01g7_r	/education/educational_institution/colors	/m/088fh
/m/02kk_c	/tv/tv_program/genre	/m/07s9rl0
/m/05p09dd	/award/award_winning_work/awards_won./award/award_honor/award	/m/0274v0r
/m/06vqdf	/people/person/gender	/m/05zppz
/m/0291hr	/film/film/genre	/m/02n4kr
/m/03_l8m	/award/award_nominee/award_nominations./award/award_nomination/award	/m/02x4x18
/m/0d8h4	/location/administrative_division/country	/m/0f8l9c
/m/0274v0r	/award/award_category/nominees./award/award_nomination/nominated_for	/m/0_b9f
/m/0209hj	/film/film/other_crew./film/film_crew_gig/film_crew_role	/m/01pvkk
/m/030znt	/people/person/spouse_s./people/marriage/type_of_union	/m/04ztj
/m/02qw_v	/education/educational_institution/students_graduates./education/education/student	/m/06z8gn
/m/072hx4	/award/award_winning_work/awards_won./award/award_honor/award	/m/0gvx_
/m/0g8st4	/film/actor/film./film/performance/film	/m/0prhz
/m/0jdhp	/film/actor/film./film/performance/film	/m/0dq626
/m/0408m53	/film/film/language	/m/02h40lc
/m/0824r	/location/location/contains	/m/0118d3
/m/0gtxj2q	/film/film/release_date_s./film/film_regional_release_date/film_release_region	/m/0d0vqn
/m/07j8r	/film/film/release_date_s./film/film_regional_release_date/film_release_region	/m/0d0vqn
/m/03xkps	/award/award_nominee/award_nominations./award/award_nomination/nominated_for	/m/03ln8b
/m/030znt	/award/award_winner/awards_won./award/award_honor/award_winner	/m/03zqc1
/m/0419kt	/film/film/other_crew./film/film_crew_gig/film_crew_role	/m/0ch6mp2
/m/016tt2	/film/film_distributor/films_distributed./film/film_film_distributor_relationship/film	/m/055td_
/m/0127m7	/film/actor/film./film/performance/film	/m/048scx
/m/054krc	/award/award_category/nominees./award/award_nomination/nominated_for	/m/08nvyr
/m/02mgp	/education/field_of_study/students_majoring./education/education/major_field_of_study	/m/02j8z
/m/01hww_	/music/performance_role/regular_performances./music/group_membership/role	/m/0mkg
/m/016kkx	/people/person/spouse_s./people/marriage/type_of_union	/m/04ztj
/m/016ks5	/film/film/language	/m/02h40lc
/m/0gkd1	/music/performance_role/regular_performances./music/group_membership/role	/m/0xzly
/m/0276jmv	/people/person/gender	/m/05zppz
/m/02v703	/award/award_category/winners./award/award_honor/ceremony	/m/0gx1673
/m/02b07b	/music/record_label/artist	/m/01t8399
/m/0315q3	/award/award_nominee/award_nominations./award/award_nomination/award_nominee	/m/02w29z
/m/0gtv7pk	/film/film/release_date_s./film/film_regional_release_date/film_release_region	/m/0f8l9c
/m/0520y3	/soccer/football_team/current_roster./soccer/football_roster_position/position	/m/0dgrmp
/m/02_xgp2	/education/educational_degree/people_with_this_degree./education/education/major_field_of_study	/m/02j8z
/m/07tl0	/organization/organization/headquarters./location/mailing_address/state_province_region	/m/01w0v
/m/096lf_	/award/award_nominee/award_nominations./award/award_nomination/award	/m/0cqhk0
/m/04sry	/film/director/film	/m/06cm5
/m/0g2c8	/award/hall_of_fame/inductees./award/hall_of_fame_induction/inductee	/m/045zr
/m/07s9rl0	/media_common/netflix_genre/titles	/m/0bmfnjs
/m/04ztj	/people/marriage_union_type/unions_of_this_type./people/marriage/location_of_ceremony	/m/0r3wm
/m/05hjnw	/film/film/genre	/m/07s9rl0
/m/01ry_x	/film/film/genre	/m/04xvh5
/m/046b0s	/award/award_winner/awards_won./award/award_honor/award_winner	/m/070j61
/m/040njc	/award/award_category/nominees./award/award_nomination/nominated_for	/m/0k419
/m/05mkhs	/award/award_nominee/award_nominations./award/award_nomination/award_nominee	/m/03k7bd
/m/012mzw	/base/schemastaging/organization_extra/phone_number./base/schemastaging/phone_sandbox/service_language	/m/02h40lc
/m/02p65p	/award/award_nominee/award_nominations./award/award_nomination/award_nominee	/m/04smkr
/m/0dplh	/education/educational_institution/students_graduates./education/education/student	/m/04kj2v
/m/0l14md	/music/instrument/instrumentalists	/m/024dw0
/m/01w9wwg	/people/person/gender	/m/05zppz
/m/0154j	/olympics/olympic_participating_country/athletes./olympics/olympic_athlete_affiliation/olympics	/m/0jhn7
/m/019pm_	/award/award_nominee/award_nominations./award/award_nomination/award	/m/09sb52
/m/0cqhk0	/award/award_category/winners./award/award_honor/award_winner	/m/08hsww
/m/02vtnf	/award/award_nominee/award_nominations./award/award_nomination/nominated_for	/m/0gcrg
/m/04ztj	/people/marriage_union_type/unions_of_this_type./people/marriage/location_of_ceremony	/m/01d26y
/m/01bbwp	/people/person/profession	/m/0dxtg
/m/03ryks	/music/artist/track_contributions./music/track_contribution/role	/m/050rj
/m/02h4rq6	/education/educational_degree/people_with_this_degree./education/education/institution	/m/01lhdt
/m/02_jkc	/award/award_nominee/award_nominations./award/award_nomination/award	/m/02nhxf
/m/02cx72	/award/award_nominee/award_nominations./award/award_nomination/nominated_for	/m/0241y7
/m/07s9rl0	/media_common/netflix_genre/titles	/m/04j14qc
/m/04jkpgv	/film/film/country	/m/0f8l9c
/m/014mlp	/education/educational_degree/people_with_this_degree./education/education/institution	/m/02ccqg
/m/02v1m7	/award/award_category/winners./award/award_honor/award_winner	/m/03h_0_z
/m/03nsm5x	/film/film/release_date_s./film/film_regional_release_date/film_release_region	/m/04gzd
/m/07ldhs	/celebrities/celebrity/celebrity_friends./celebrities/friendship/friend	/m/07swvb
/m/0163t3	/people/person/languages	/m/02h40lc
/m/0x67	/people/ethnicity/people	/m/0lgm5
/m/043g7l	/music/record_label/artist	/m/01wj18h
/m/04yyhw	/people/person/spouse_s./people/marriage/type_of_union	/m/04ztj
/m/0prhz	/film/film/language	/m/02h40lc
/m/060j8b	/award/award_winner/awards_won./award/award_honor/award_winner	/m/072bb1
/m/02cx72	/people/person/spouse_s./people/marriage/type_of_union	/m/04ztj
/m/0187nd	/education/educational_institution/students_graduates./education/education/major_field_of_study	/m/01lj9
/m/01kff7	/film/film/language	/m/02h40lc
/m/020_95	/award/award_nominee/award_nominations./award/award_nomination/award_nominee	/m/02qgqt
/m/023r2x	/music/performance_role/track_performances./music/track_contribution/role	/m/01xqw
/m/01y665	/people/person/gender	/m/05zppz
/m/01j6t0	/medicine/symptom/symptom_of	/m/02bft
/m/0879bpq	/film/film/release_date_s./film/film_regional_release_date/film_release_region	/m/0f8l9c
/m/03wh8kl	/people/person/profession	/m/0dxtg
/m/05b5_tj	/people/person/gender	/m/05zppz
/m/013qvn	/film/actor/film./film/performance/film	/m/02sfnv
/m/04cl1	/people/person/languages	/m/02h40lc
/m/01lhdt	/education/educational_institution/students_graduates./education/education/student	/m/017r2
/m/0dgrmp	/sports/sports_position/players./sports/sports_team_roster/team	/m/04b5n0
/m/047xyn	/award/award_category/winners./award/award_honor/award_winner	/m/0jt90f5
/m/05zwrg0	/film/film/other_crew./film/film_crew_gig/film_crew_role	/m/0ch6mp2
/m/013yq	/location/location/contains	/m/01_s9q
/m/06msq2	/people/person/profession	/m/0dxtg
/m/06c1y	/military/military_combatant/military_conflicts./military/military_combatant_group/combatants	/m/02psqkz
/m/08hsww	/award/award_winner/awards_won./award/award_honor/award_winner	/m/083chw
/m/0l14md	/music/performance_role/track_performances./music/track_contribution/role	/m/0gkd1
/m/039bpc	/base/popstra/celebrity/friendship./base/popstra/friendship/participant	/m/01pw2f1
/m/03ln8b	/tv/tv_program/regular_cast./tv/regular_tv_appearance/actor	/m/05lb65
/m/0947l	/travel/travel_destination/climate./travel/travel_destination_monthly_climate/month	/m/028kb
/m/0gl02yg	/film/film/release_date_s./film/film_regional_release_date/film_release_region	/m/0f8l9c
/m/0gkd1	/music/instrument/instrumentalists	/m/04m2zj
/m/05dxl_	/people/person/place_of_birth	/m/02cl1
/m/054krc	/award/award_category/nominees./award/award_nomination/nominated_for	/m/07l50_1
/m/07jbh	/olympics/olympic_sport/athletes./olympics/olympic_athlete_affiliation/country	/m/06c1y
/m/01pjr7	/people/person/gender	/m/05zppz
/m/03h_9lg	/film/actor/film./film/performance/film	/m/084302
/m/0lgsq	/music/artist/track_contributions./music/track_contribution/role	/m/01vdm0
/m/02qw1zx	/sports/sports_league_draft/picks./sports/sports_league_draft_pick/school	/m/01jsk6
/m/01_0f7	/award/award_winning_work/awards_won./award/award_honor/award_winner	/m/04pf4r
/m/0cm2xh	/military/military_conflict/combatants./military/military_combatant_group/combatants	/m/0f8l9c
/m/01pcdn	/award/award_nominee/award_nominations./award/award_nomination/nominated_for	/m/05h43ls
/m/02qmncd	/award/award_nominee/award_nominations./award/award_nomination/award_nominee	/m/02r4qs
/m/0dtzkt	/film/film/music	/m/0lccn
/m/02wtp6	/film/film/release_date_s./film/film_regional_release_date/film_release_region	/m/07dfk
/m/0hmr4	/award/award_winning_work/awards_won./award/award_honor/honored_for	/m/0pv2t
/m/0l15f_	/music/performance_role/guest_performances./music/recording_contribution/performance_role	/m/085jw
/m/01vqrm	/people/person/place_of_birth	/m/01w2v
/m/0154j	/olympics/olympic_participating_country/medals_won./olympics/olympic_medal_honor/olympics	/m/0lbd9
/m/01pjr7	/film/director/film	/m/0473rc
/m/0b6l1st	/film/film/other_crew./film/film_crew_gig/film_crew_role	/m/09vw2b7
/m/0dgrmp	/sports/sports_position/players./sports/sports_team_roster/team	/m/058dm9
/m/09wj5	/award/award_nominee/award_nominations./award/award_nomination/award_nominee	/m/0154qm
/m/01z7_f	/award/award_winner/awards_won./award/award_honor/award_winner	/m/0755wz
/m/0bqdvt	/award/award_nominee/award_nominations./award/award_nomination/award_nominee	/m/02qgyv
/m/014v6f	/award/award_nominee/award_nominations./award/award_nomination/award_nominee	/m/030znt
/m/06crng	/people/person/profession	/m/0dxtg
/m/018_q8	/award/award_winner/awards_won./award/award_honor/award_winner	/m/04rqd
/m/057176	/award/award_winner/awards_won./award/award_honor/award_winner	/m/020_95
/m/097h2	/tv/tv_program/genre	/m/03fpg
/m/0l14qv	/music/performance_role/regular_performances./music/group_membership/role	/m/0mkg
/m/01b7lc	/organization/organization/headquarters./location/mailing_address/state_province_region	/m/01n7q
/m/0l99s	/award/award_nominee/award_nominations./award/award_nomination/award	/m/0ddd9
/m/05dtwm	/people/person/spouse_s./people/marriage/type_of_union	/m/04ztj
/m/018swb	/people/person/spouse_s./people/marriage/type_of_union	/m/04ztj
/m/011yxy	/film/film/written_by	/m/03s9b
/m/01hqhm	/film/film/language	/m/02h40lc
/m/083chw	/people/person/gender	/m/05zppz
/m/06x4l_	/people/person/gender	/m/05zppz
/m/03_6y	/award/award_nominee/award_nominations./award/award_nomination/award_nominee	/m/023kzp
/m/01d1st	/award/award_nominee/award_nominations./award/award_nomination/award_nominee	/m/05cx7x
/m/0c3kw	/award/award_nominee/award_nominations./award/award_nomination/award	/m/0262x6
/m/04kxsb	/award/award_category/nominees./award/award_nomination/nominated_for	/m/0h0wd9
/m/027pfb2	/tv/tv_program/regular_cast./tv/regular_tv_appearance/actor	/m/04wx2v
/m/024my5	/people/person/profession	/m/0np9r
/m/04sry	/people/person/religion	/m/0c8wxp
/m/01y_rz	/music/group_member/membership./music/group_membership/group	/m/06mj4
/m/095zvfg	/award/award_nominee/award_nominations./award/award_nomination/award_nominee	/m/03m49ly
/m/01vw20h	/award/award_nominee/award_nominations./award/award_nomination/award_nominee	/m/05mxw33
/m/03nsm5x	/film/film/release_date_s./film/film_regional_release_date/film_release_region	/m/06npd
/m/021vwt	/award/award_nominee/award_nominations./award/award_nomination/nominated_for	/m/02k_4g
/m/054krc	/award/award_category/winners./award/award_honor/award_winner	/m/02wb6d
/m/02v1m7	/award/award_category/winners./award/award_honor/ceremony	/m/0gx1673
/m/01gssm	/government/legislative_session/members./government/government_position_held/district_represented	/m/05k7sb
/m/0l14md	/music/instrument/instrumentalists	/m/01gg59
/m/05zjtn4	/education/educational_institution/colors	/m/038hg
/m/015nhn	/government/politician/government_positions_held./government/government_position_held/basic_title	/m/0p5vf
/m/08k1lz	/people/person/gender	/m/05zppz
/m/0bz6l9	/award/award_ceremony/awards_presented./award/award_honor/honored_for	/m/0h0wd9
/m/077rj	/people/person/gender	/m/05zppz
/m/08kp57	/people/person/gender	/m/05zppz
/m/06w6_	/base/popstra/celebrity/friendship./base/popstra/friendship/participant	/m/029q_y
/m/01wg6y	/people/person/gender	/m/05zppz
/m/04353	/film/director/film	/m/04gp58p
/m/0690ct	/soccer/football_team/current_roster./sports/sports_team_roster/position	/m/0dgrmp
/m/03wy70	/people/person/gender	/m/05zppz
/m/0djtky	/people/person/languages	/m/02h40lc
/m/01p3ty	/film/film/language	/m/02h40lc
/m/04wg38	/people/person/profession	/m/0dxtg
/m/014mlp	/education/educational_degree/people_with_this_degree./education/education/institution	/m/01b7lc
/m/0gvx_	/award/award_category/winners./award/award_honor/ceremony	/m/0fv89q
/m/029q_y	/people/person/spouse_s./people/marriage/type_of_union	/m/04ztj
/m/07jbh	/olympics/olympic_sport/athletes./olympics/olympic_athlete_affiliation/country	/m/0jgd
/m/013qvn	/people/deceased_person/place_of_death	/m/0k049
/m/064_8sq	/language/human_language/countries_spoken_in	/m/03_xj
/m/02yxbc	/film/film/language	/m/02h40lc
/m/06182p	/education/educational_institution/students_graduates./education/education/student	/m/01tcf7
/m/01271h	/base/popstra/celebrity/dated./base/popstra/dated/participant	/m/07r4c
/m/01j95f	/soccer/football_team/current_roster./sports/sports_team_roster/position	/m/0dgrmp
/m/059j4x	/people/person/profession	/m/0dxtg
/m/03h_0_z	/award/award_winner/awards_won./award/award_honor/award_winner	/m/018n6m
/m/04f7c55	/people/person/gender	/m/05zppz
/m/02t__l	/award/award_nominee/award_nominations./award/award_nomination/award	/m/09lvl1
/m/0m66w	/people/person/spouse_s./people/marriage/type_of_union	/m/04ztj
/m/060j8b	/people/person/religion	/m/0c8wxp
/m/0djb3vw	/film/film/genre	/m/07s9rl0
/m/04kxsb	/award/award_category/nominees./award/award_nomination/nominated_for	/m/027m5wv
/m/0dckvs	/film/film/other_crew./film/film_crew_gig/film_crew_role	/m/01pvkk
/m/0dgrmp	/sports/sports_position/players./sports/sports_team_roster/team	/m/075q_
/m/02825nf	/film/film/release_date_s./film/film_regional_release_date/film_release_region	/m/04gzd
/m/0yzvw	/film/film/language	/m/02h40lc
/m/0d8lm	/music/performance_role/guest_performances./music/recording_contribution/performance_role	/m/0l14qv
/m/0bvfqq	/award/award_ceremony/awards_presented./award/award_honor/award_winner	/m/02h1rt
/m/05fgt1	/film/film/other_crew./film/film_crew_gig/film_crew_role	/m/0ch6mp2
/m/0jhn7	/olympics/olympic_games/sports	/m/06z6r
/m/06r2_	/film/film/release_date_s./film/film_regional_release_date/film_release_region	/m/0d0vqn
/m/05_5_22	/film/film/other_crew./film/film_crew_gig/film_crew_role	/m/0ch6mp2
/m/04smkr	/award/award_nominee/award_nominations./award/award_nomination/award_nominee	/m/02p65p
/m/01k_n63	/people/person/profession	/m/016z4k
/m/0fd3y	/music/genre/artists	/m/0bpk2
/m/04w391	/film/actor/dubbing_performances./film/dubbing_performance/language	/m/02h40lc
/m/07h07	/award/award_nominee/award_nominations./award/award_nomination/nominated_for	/m/0m313
/m/08swgx	/award/award_nominee/award_nominations./award/award_nomination/award_nominee	/m/015t56
/m/014gf8	/award/award_nominee/award_nominations./award/award_nomination/award	/m/0789_m
/m/01jsk6	/education/educational_institution/students_graduates./education/education/student	/m/03q45x
/m/0b7l4x	/film/film/edited_by	/m/04cy8rb
/m/078jt5	/award/award_winner/awards_won./award/award_honor/award_winner	/m/019pkm
/m/0m68w	/film/actor/film./film/performance/film	/m/0pk1p
/m/0gl02yg	/film/film/genre	/m/07s9rl0
/m/014v6f	/film/actor/film./film/performance/film	/m/0cz_ym
/m/03yvf2	/film/film/release_date_s./film/film_regional_release_date/film_release_region	/m/0f8l9c
/m/054krc	/award/award_category/nominees./award/award_nomination/nominated_for	/m/027m5wv
/m/0g8st4	/award/award_nominee/award_nominations./award/award_nomination/award_nominee	/m/0fthdk
/m/029q_y	/tv/tv_writer/tv_programs./tv/tv_program_writer_relationship/tv_program	/m/01f3p_
/m/03t5b6	/award/award_category/winners./award/award_honor/award_winner	/m/018n6m
/m/0h7pj	/celebrities/celebrity/celebrity_friends./celebrities/friendship/friend	/m/01hxs4
/m/01xhh5	/people/ethnicity/geographic_distribution	/m/0d05w3
/m/023cjg	/film/film/story_by	/m/041h0
/m/07s93v	/award/award_nominee/award_nominations./award/award_nomination/award_nominee	/m/0hw1j
/m/0jrtv	/location/location/adjoin_s./location/adjoining_relationship/adjoins	/m/0j_1v
/m/0prhz	/film/film/story_by	/m/081k8
/m/04ztj	/people/marriage_union_type/unions_of_this_type./people/marriage/location_of_ceremony	/m/0g1w5
/m/02xx5	/base/localfood/seasonal_month/produce_available./base/localfood/produce_availability/seasonal_months	/m/028kb
/m/05p8bf9	/soccer/football_team/current_roster./soccer/football_roster_position/position	/m/0dgrmp
/m/026l1lq	/sports/sports_team/roster./american_football/football_historical_roster_position/position_s	/m/0bgv4g
/m/04mx7s	/music/group_member/membership./music/group_membership/group	/m/01fchy
/m/0dgrmp	/sports/sports_position/players./sports/sports_team_roster/team	/m/0303jw
/m/01j_9c	/education/educational_institution/students_graduates./education/education/major_field_of_study	/m/0g26h
/m/0343h	/people/person/profession	/m/0dxtg
/m/07dfk	/travel/travel_destination/climate./travel/travel_destination_monthly_climate/month	/m/028kb
/m/02qrbbx	/award/award_category/nominees./award/award_nomination/nominated_for	/m/01ffx4
/m/01vs8ng	/people/person/spouse_s./people/marriage/type_of_union	/m/04ztj
/m/0164y7	/people/person/profession	/m/01c72t
/m/01y17m	/education/educational_institution/students_graduates./education/education/major_field_of_study	/m/0g26h
/m/01kwsg	/award/award_nominee/award_nominations./award/award_nomination/award_nominee	/m/01713c
/m/017jd9	/film/film/language	/m/02h40lc
/m/02_xgp2	/education/educational_degree/people_with_this_degree./education/education/institution	/m/01jsk6
/m/0789_m	/award/award_category/winners./award/award_honor/award_winner	/m/01tcf7
/m/016tt2	/film/film_distributor/films_distributed./film/film_film_distributor_relationship/film	/m/011ysn
/m/05q7cj	/award/award_ceremony/awards_presented./award/award_honor/award_winner	/m/01vvb4m
/m/054krc	/award/award_category/winners./award/award_honor/award_winner	/m/01gg59
/m/01fyzy	/people/person/languages	/m/02h40lc
/m/01w1kyf	/film/actor/film./film/performance/film	/m/02sfnv
/m/01y9pk	/organization/endowed_organization/endowment./measurement_unit/dated_money_value/currency	/m/0ptk_
/m/0mkg	/music/instrument/instrumentalists	/m/01k23t
/m/0bh8yn3	/film/film/other_crew./film/film_crew_gig/film_crew_role	/m/09vw2b7
/m/0gqz2	/award/award_category/winners./award/award_honor/award_winner	/m/01k23t
/m/0l786	/award/award_nominee/award_nominations./award/award_nomination/award	/m/04kxsb
/m/0291hr	/film/film/language	/m/02h40lc
/m/06qn87	/award/award_nominee/award_nominations./award/award_nomination/nominated_for	/m/0c_j9x
/m/0m68w	/award/award_nominee/award_nominations./award/award_nomination/nominated_for	/m/0pk1p
/m/0jmmn	/sports/professional_sports_team/draft_picks./sports/sports_league_draft_pick/draft	/m/09th87
/m/0tc7	/people/person/languages	/m/02h40lc
/m/0blbxk	/award/award_nominee/award_nominations./award/award_nomination/award_nominee	/m/042xrr
/m/01kwsg	/award/award_winner/awards_won./award/award_honor/award_winner	/m/01713c
/m/016tt2	/award/award_nominee/award_nominations./award/award_nomination/nominated_for	/m/01f7gh
/m/02w4v	/music/genre/artists	/m/01tw31
/m/03rhqg	/music/record_label/artist	/m/01vzx45
/m/02p65p	/award/award_winner/awards_won./award/award_honor/award_winner	/m/05yh_t
/m/03nsm5x	/film/film/genre	/m/07s9rl0
/m/0l14md	/music/performance_role/regular_performances./music/group_membership/role	/m/01hww_
/m/01gssm	/government/legislative_session/members./government/government_position_held/district_represented	/m/06yxd
/m/0cp0ph6	/film/film/genre	/m/02l7c8
/m/03rk0	/location/location/adjoin_s./location/adjoining_relationship/adjoins	/m/06m_5
/m/09qwmm	/award/award_category/nominees./award/award_nomination/nominated_for	/m/02yxbc
/m/01v3vp	/film/actor/dubbing_performances./film/dubbing_performance/language	/m/02h40lc
/m/0djd3	/base/biblioness/bibs_location/state	/m/05fjy
/m/07z542	/people/person/gender	/m/05zppz
/m/036hf4	/award/award_nominee/award_nominations./award/award_nomination/award_nominee	/m/057176
/m/05842k	/music/performance_role/regular_performances./music/group_membership/role	/m/028tv0
/m/05kms	/music/instrument/instrumentalists	/m/01ycfv
/m/07rd7	/influence/influence_node/influenced_by	/m/0f0kz
/m/0bq8tmw	/film/film/release_date_s./film/film_regional_release_date/film_release_region	/m/05b4w
/m/0488g9	/award/award_nominee/award_nominations./award/award_nomination/nominated_for	/m/05nlzq
/m/019_1h	/people/person/gender	/m/05zppz
/m/014j1m	/food/food/nutrients./food/nutrition_fact/nutrient	/m/025s7x6
/m/01wz_ml	/people/person/gender	/m/05zppz
/m/07vfj	/education/educational_institution/students_graduates./education/education/major_field_of_study	/m/037mh8
/m/081_zm	/people/person/profession	/m/0dxtg
/m/017jd9	/film/film/film_format	/m/07fb8_
/m/03fmw_	/soccer/football_team/current_roster./sports/sports_team_roster/position	/m/0dgrmp
/m/021vwt	/film/actor/film./film/performance/film	/m/05fgt1
/m/040v3t	/award/award_category/winners./award/award_honor/award_winner	/m/02g75
/m/015010	/film/actor/film./film/performance/film	/m/0c_j9x
/m/07rzf	/people/person/profession	/m/01c72t
/m/05m9f9	/award/award_nominee/award_nominations./award/award_nomination/award	/m/0gkr9q
/m/03l7tr	/soccer/football_team/current_roster./soccer/football_roster_position/position	/m/0dgrmp
/m/0hn10	/media_common/netflix_genre/titles	/m/02d413
/m/0gs96	/award/award_category/nominees./award/award_nomination/nominated_for	/m/017jd9
/m/02ryx0	/people/person/gender	/m/05zppz
/m/02l0xc	/people/person/gender	/m/05zppz
/m/02ylg6	/film/film/release_date_s./film/film_regional_release_date/film_release_region	/m/05b4w
/m/0bfvd4	/award/award_category/winners./award/award_honor/award_winner	/m/0ywqc
/m/098sx	/people/person/profession	/m/01l5t6
/m/05842k	/music/performance_role/track_performances./music/track_contribution/role	/m/01679d
/m/0nppc	/location/location/adjoin_s./location/adjoining_relationship/adjoins	/m/0nf3h
/m/027hjff	/award/award_ceremony/awards_presented./award/award_honor/honored_for	/m/07l450
/m/03rk0	/location/location/contains	/m/0cw51
/m/0f8l9c	/location/location/adjoin_s./location/adjoining_relationship/adjoins	/m/0154j
/m/016tt2	/film/film_distributor/films_distributed./film/film_film_distributor_relationship/film	/m/0h0wd9
/m/01w58n3	/people/person/languages	/m/064_8sq
/m/02rjz5	/soccer/football_team/current_roster./sports/sports_team_roster/position	/m/0dgrmp
/m/09blyk	/media_common/netflix_genre/titles	/m/0661ql3
/m/014mlp	/education/educational_degree/people_with_this_degree./education/education/institution	/m/012mzw
/m/0184jc	/award/award_nominee/award_nominations./award/award_nomination/award_nominee	/m/06bzwt
/m/02b0y3	/soccer/football_team/current_roster./sports/sports_team_roster/position	/m/03f0fp
/m/01qtj9	/location/location/contains	/m/0d6nx
/m/0l14md	/music/performance_role/track_performances./music/track_contribution/role	/m/01qbl
/m/0401sg	/film/film/country	/m/0f8l9c
/m/05fnl9	/award/award_winner/awards_won./award/award_honor/award_winner	/m/01y665
/m/02pt27	/music/artist/track_contributions./music/track_contribution/role	/m/01rhl
/m/07y8l9	/film/actor/film./film/performance/film	/m/0cp0ph6
/m/0kryqm	/people/person/gender	/m/05zppz
/m/0f_nbyh	/award/award_category/nominees./award/award_nomination/nominated_for	/m/0661ql3
/m/03t97y	/film/film/prequel	/m/01ln5z
/m/01ztgm	/people/person/spouse_s./people/marriage/type_of_union	/m/04ztj
/m/0hkq4	/location/location/contains	/m/0m_xy
/m/07rzf	/film/actor/dubbing_performances./film/dubbing_performance/language	/m/02h40lc
/m/07s9rl0	/media_common/netflix_genre/titles	/m/07jqjx
/m/0gs96	/award/award_category/nominees./award/award_nomination/nominated_for	/m/0c_j9x
/m/0k1bs	/music/group_member/membership./music/group_membership/group	/m/0394y
/m/01w7nwm	/people/person/religion	/m/01lp8
/m/02lw5z	/organization/organization/headquarters./location/mailing_address/state_province_region	/m/01n7q
/m/09qj50	/award/award_category/winners./award/award_honor/award_winner	/m/04mhxx
/m/01w724	/people/person/gender	/m/05zppz
/m/052h3	/people/person/profession	/m/06q2q
/m/06mvq	/people/ethnicity/people	/m/04smkr
/m/0xnvg	/people/ethnicity/people	/m/06m6z6
/m/09lhln	/sports/pro_athlete/teams./sports/sports_team_roster/team	/m/01x4wq
/m/04gxf	/location/location/time_zones	/m/02fqwt
/m/03wy70	/people/person/profession	/m/0np9r
/m/02wk_43	/award/award_nominee/award_nominations./award/award_nomination/award_nominee	/m/06msq2
/m/0627sn	/people/person/spouse_s./people/marriage/type_of_union	/m/04ztj
/m/01hww_	/music/performance_role/track_performances./music/track_contribution/role	/m/01vdm0
/m/0jmmn	/sports/sports_team/sport	/m/018w8
/m/0gj9qxr	/film/film/production_companies	/m/05mgj0
/m/05mxw33	/people/person/gender	/m/05zppz
/m/0bby9p5	/film/film/release_date_s./film/film_regional_release_date/film_release_region	/m/0d0vqn
/m/05dmmc	/film/film/language	/m/02h40lc
/m/02xbyr	/film/film/production_companies	/m/04rcl7
/m/0gz6b6g	/film/film/release_date_s./film/film_regional_release_date/film_release_region	/m/0f8l9c
/m/02b0yz	/soccer/football_team/current_roster./soccer/football_roster_position/position	/m/0dgrmp
/m/07tds	/education/educational_institution/students_graduates./education/education/major_field_of_study	/m/037mh8
/m/09wj5	/award/award_nominee/award_nominations./award/award_nomination/award_nominee	/m/02ck7w
/m/01rzqj	/award/award_nominee/award_nominations./award/award_nomination/award_nominee	/m/05dtwm
/m/03rk0	/olympics/olympic_participating_country/medals_won./olympics/olympic_medal_honor/olympics	/m/06sks6
/m/047gpsd	/film/film/other_crew./film/film_crew_gig/film_crew_role	/m/09vw2b7
/m/02n4kr	/media_common/netflix_genre/titles	/m/01j5ql
/m/01q940	/music/record_label/artist	/m/0f_y9
/m/01xlqd	/film/film/genre	/m/02l7c8
/m/05mt_q	/people/person/profession	/m/05z96
/m/07m69t	/soccer/football_player/current_team./sports/sports_team_roster/team	/m/01gxqf
/m/0fby2t	/film/actor/film./film/performance/film	/m/0bq8tmw
/m/01ps2h8	/people/person/languages	/m/02h40lc
/m/06cp5	/music/genre/artists	/m/04qmr
/m/0g26h	/education/field_of_study/students_majoring./education/education/student	/m/0tc7
/m/01vs_v8	/award/award_nominee/award_nominations./award/award_nomination/award	/m/02f716
/m/02k_4g	/award/award_winning_work/awards_won./award/award_honor/award_winner	/m/030znt
/m/037cr1	/film/film/language	/m/02h40lc
/m/0484q	/people/person/spouse_s./people/marriage/type_of_union	/m/04ztj
/m/0bmfnjs	/film/film/release_date_s./film/film_regional_release_date/film_release_region	/m/06qd3
/m/050l8	/location/location/adjoin_s./location/adjoining_relationship/adjoins	/m/0846v
/m/0dx97	/people/person/gender	/m/05zppz
/m/0blbxk	/award/award_nominee/award_nominations./award/award_nomination/award_nominee	/m/0509bl
/m/02bj22	/film/film/other_crew./film/film_crew_gig/film_crew_role	/m/09vw2b7
/m/0266r6h	/film/actor/film./film/performance/film	/m/0gvvf4j
/m/02704ff	/film/film/genre	/m/0vgkd
/m/0fqz6	/people/ethnicity/people	/m/02k4b2
/m/07ftc0	/people/person/languages	/m/012w70
/m/04bgy	/music/artist/track_contributions./music/track_contribution/role	/m/01qbl
/m/01c9d1	/award/award_category/winners./award/award_honor/award_winner	/m/013rds
/m/0hv8w	/film/film/other_crew./film/film_crew_gig/film_crew_role	/m/01pvkk
/m/037jz	/award/award_nominee/award_nominations./award/award_nomination/award	/m/0ddd9
/m/01v1d8	/music/performance_role/track_performances./music/track_contribution/role	/m/0gkd1
/m/06b_0	/people/person/spouse_s./people/marriage/type_of_union	/m/04ztj
/m/05vzw3	/award/award_winner/awards_won./award/award_honor/award_winner	/m/01vs_v8
/m/01271h	/people/person/spouse_s./people/marriage/type_of_union	/m/04ztj
/m/09sb52	/award/award_category/nominees./award/award_nomination/nominated_for	/m/0cz_ym
/m/0m66w	/award/award_nominee/award_nominations./award/award_nomination/award_nominee	/m/01pcdn
/m/03v3xp	/film/actor/film./film/performance/film	/m/0fh2v5
/m/09sb52	/award/award_category/winners./award/award_honor/award_winner	/m/06t74h
/m/05842k	/music/performance_role/track_performances./music/track_contribution/role	/m/01vdm0
/m/05qsxy	/award/award_winner/awards_won./award/award_honor/award_winner	/m/0265v21
/m/0cn68	/people/ethnicity/people	/m/01xpxv
/m/02bqm0	/government/legislative_session/members./government/government_position_held/district_represented	/m/03gh4
/m/0qmfz	/film/film/country	/m/0f8l9c
/m/014mlp	/education/educational_degree/people_with_this_degree./education/education/institution	/m/01y9pk
/m/01kwsg	/award/award_nominee/award_nominations./award/award_nomination/award	/m/09sb52
/m/01z27	/olympics/olympic_sport/athletes./olympics/olympic_athlete_affiliation/country	/m/04g5k
/m/0db94w	/film/film/release_date_s./film/film_regional_release_date/film_release_region	/m/0jgd
/m/02hkv5	/people/person/gender	/m/05zppz
/m/054yc0	/film/film_subject/films	/m/02825nf
/m/06r2_	/film/film/other_crew./film/film_crew_gig/film_crew_role	/m/0ch6mp2
/m/01vw8k	/film/film/other_crew./film/film_crew_gig/film_crew_role	/m/0ch6mp2
/m/05489	/film/film_subject/films	/m/04vr_f
/m/07x4c	/education/educational_institution/students_graduates./education/education/student	/m/02lt8
/m/087vz	/olympics/olympic_participating_country/medals_won./olympics/olympic_medal_honor/olympics	/m/0jhn7
/m/0m9p3	/film/film/language	/m/02h40lc
/m/0401sg	/film/film/release_date_s./film/film_regional_release_date/film_release_region	/m/0154j
/m/01vng3b	/people/person/gender	/m/05zppz
/m/016gkf	/people/person/spouse_s./people/marriage/type_of_union	/m/04ztj
/m/0344gc	/film/film/language	/m/02h40lc
/m/0k4fz	/film/film/language	/m/02h40lc
/m/0h1cdwq	/film/film/release_date_s./film/film_regional_release_date/film_release_region	/m/03rk0
/m/01n7q	/location/statistical_region/religions./location/religion_percentage/religion	/m/0631_
/m/09yhzs	/award/award_nominee/award_nominations./award/award_nomination/award_nominee	/m/01gvr1
/m/0133h8	/location/administrative_division/first_level_division_of	/m/0h7x
/m/0661ql3	/film/film/release_date_s./film/film_regional_release_date/film_release_region	/m/06c1y
/m/06w87	/music/performance_role/regular_performances./music/group_membership/role	/m/0l14qv
/m/013yq	/travel/travel_destination/climate./travel/travel_destination_monthly_climate/month	/m/02xx5
/m/02wwmhc	/film/film/genre	/m/07s9rl0
/m/019f2f	/people/person/religion	/m/0flw86
/m/0127m7	/award/award_nominee/award_nominations./award/award_nomination/award_nominee	/m/027kmrb
/m/0fqjhm	/award/award_winner/awards_won./award/award_honor/award_winner	/m/02bj6k
/m/04rqd	/broadcast/content/artist	/m/01jcxwp
/m/0k419	/film/film/language	/m/02h40lc
/m/05h43ls	/film/film/other_crew./film/film_crew_gig/film_crew_role	/m/0215hd
/m/04sry	/award/award_nominee/award_nominations./award/award_nomination/award	/m/054ky1
/m/01w02sy	/award/award_nominee/award_nominations./award/award_nomination/nominated_for	/m/0170th
/m/05dbyt	/film/actor/film./film/performance/film	/m/07jnt
/m/0bth54	/film/film/other_crew./film/film_crew_gig/film_crew_role	/m/0n1h
/m/01g42	/film/actor/film./film/performance/film	/m/0qmfz
/m/014mlp	/education/educational_degree/people_with_this_degree./education/education/institution	/m/0d07s
/m/0bfvw2	/award/award_category/nominees./award/award_nomination/nominated_for	/m/090s_0
/m/0661ql3	/film/film/release_date_s./film/film_regional_release_date/film_release_region	/m/05b4w
/m/0bx8pn	/education/educational_institution/school_type	/m/04qbv
/m/0x67	/people/ethnicity/languages_spoken	/m/02h40lc
/m/040v3t	/award/award_category/winners./award/award_honor/award_winner	/m/01dhmw
/m/045hz5	/people/person/places_lived./people/place_lived/location	/m/09c6w
/m/02qjj7	/people/person/gender	/m/05zppz
/m/030znt	/award/award_nominee/award_nominations./award/award_nomination/award_nominee	/m/05lb30
/m/045j3w	/film/film/release_date_s./film/film_regional_release_date/film_release_region	/m/0154j
/m/0265v21	/people/person/profession	/m/0dxtg
/m/01xdf5	/people/person/spouse_s./people/marriage/type_of_union	/m/04ztj
/m/023kzp	/base/popstra/celebrity/dated./base/popstra/dated/participant	/m/03zqc1
/m/02yxbc	/film/film/other_crew./film/film_crew_gig/film_crew_role	/m/09vw2b7
/m/08vk_r	/soccer/football_team/current_roster./soccer/football_roster_position/position	/m/0dgrmp
/m/04nl83	/film/film/other_crew./film/film_crew_gig/film_crew_role	/m/0ch6mp2
/m/03m3nzf	/award/award_nominee/award_nominations./award/award_nomination/award_nominee	/m/03j367r
/m/06c1y	/olympics/olympic_participating_country/athletes./olympics/olympic_athlete_affiliation/olympics	/m/06sks6
/m/03xq0f	/film/film_distributor/films_distributed./film/film_film_distributor_relationship/film	/m/02qk3fk
/m/06c1y	/olympics/olympic_participating_country/medals_won./olympics/olympic_medal_honor/olympics	/m/06sks6
/m/03rhqg	/music/record_label/artist	/m/01kstn9
/m/072hx4	/film/film/release_date_s./film/film_regional_release_date/film_release_region	/m/06npd
/m/0l14qv	/music/performance_role/regular_performances./music/group_membership/role	/m/0319l
/m/05p09zm	/award/award_category/winners./award/award_honor/award_winner	/m/01ztgm
/m/07tds	/education/educational_institution/students_graduates./education/education/student	/m/03xpfzg
/m/0bkf72	/award/award_nominee/award_nominations./award/award_nomination/award	/m/040njc
/m/03ln8b	/tv/tv_program/genre	/m/02l7c8
/m/0jvtp	/people/person/languages	/m/02h40lc
/m/0pv2t	/award/award_winning_work/awards_won./award/award_honor/honored_for	/m/0hmr4
/m/01g969	/film/actor/film./film/performance/film	/m/070g7
/m/047fjjr	/film/film/other_crew./film/film_crew_gig/film_crew_role	/m/0ch6mp2
/m/0gkd1	/music/performance_role/regular_performances./music/group_membership/role	/m/0mkg
/m/0cp9f9	/people/person/profession	/m/0dxtg
/m/016vg8	/award/award_nominee/award_nominations./award/award_nomination/award_nominee	/m/023kzp
/m/01w7nwm	/music/artist/track_contributions./music/track_contribution/role	/m/0l15bq
/m/01tcf7	/award/award_nominee/award_nominations./award/award_nomination/award_nominee	/m/023kzp
/m/08x5c_	/people/person/spouse_s./people/marriage/type_of_union	/m/04ztj
/m/0fthdk	/award/award_nominee/award_nominations./award/award_nomination/award_nominee	/m/05th8t
/m/0262zm	/award/award_category/winners./award/award_honor/award_winner	/m/0c3kw
/m/0bmfnjs	/film/film/release_date_s./film/film_regional_release_date/film_release_region	/m/0f8l9c
/m/0djc3s	/people/person/nationality	/m/03rk0
/m/01pfkw	/award/award_nominee/award_nominations./award/award_nomination/award	/m/01bgqh
/m/04fc6c	/music/record_label/artist	/m/01k3qj
/m/0g68zt	/film/film/genre	/m/07s9rl0
/m/07s9rl0	/media_common/netflix_genre/titles	/m/0prhz
/m/03_wj_	/award/award_nominee/award_nominations./award/award_nomination/award_nominee	/m/0184jc
/m/01713c	/award/award_nominee/award_nominations./award/award_nomination/award	/m/0c422z4
/m/0fj52s	/food/food/nutrients./food/nutrition_fact/nutrient	/m/06x4c
/m/02q6gfp	/film/film/costume_design_by	/m/03gt0c5
/m/01qqtr	/award/award_nominee/award_nominations./award/award_nomination/award_nominee	/m/03zg2x
/m/02qyntr	/award/award_category/nominees./award/award_nomination/nominated_for	/m/0c_j9x
/m/01j6t0	/medicine/symptom/symptom_of	/m/072hv
/m/02w_6xj	/award/award_category/winners./award/award_honor/award_winner	/m/01_vfy
/m/0168ql	/people/person/spouse_s./people/marriage/type_of_union	/m/04ztj
/m/0h3k3f	/award/award_winning_work/awards_won./award/award_honor/award_winner	/m/0171lb
/m/0gl6x	/education/educational_institution/colors	/m/088fh
/m/0jgd	/olympics/olympic_participating_country/medals_won./olympics/olympic_medal_honor/olympics	/m/0lbd9
/m/0c422z4	/award/award_category/nominees./award/award_nomination/nominated_for	/m/0bq8tmw
/m/0x67	/people/ethnicity/people	/m/030znt
/m/01qg7c	/people/person/spouse_s./people/marriage/type_of_union	/m/04ztj
/m/03f0fp	/sports/sports_position/players./sports/sports_team_roster/team	/m/03j6_5
/m/09v9mks	/film/film/release_date_s./film/film_regional_release_date/film_release_region	/m/03rk0
/m/08n__5	/award/award_nominee/award_nominations./award/award_nomination/award	/m/0gqz2
/m/02cbvn	/education/educational_institution/students_graduates./education/education/major_field_of_study	/m/01lj9
/m/0b_dy	/award/award_nominee/award_nominations./award/award_nomination/award_nominee	/m/04smkr
/m/05h43ls	/film/film/produced_by	/m/0m66w
/m/01fxck	/people/person/place_of_birth	/m/019fh
/m/054ky1	/award/award_category/winners./award/award_honor/award_winner	/m/01qq_lp
/m/028c_8	/sports/sports_position/players./sports/sports_team_roster/team	/m/02d02
/m/07swvb	/award/award_nominee/award_nominations./award/award_nomination/nominated_for	/m/03c7twt
/m/0473rc	/film/film/produced_by	/m/01pjr7
/m/0m313	/film/film/film_format	/m/07fb8_
/m/01271h	/people/person/gender	/m/05zppz
/m/0fkx3	/government/government_office_category/officeholders./government/government_position_held/jurisdiction_of_office	/m/0694j
/m/03jldb	/people/person/spouse_s./people/marriage/type_of_union	/m/04ztj
/m/09bkc6	/soccer/football_team/current_roster./soccer/football_roster_position/position	/m/0dgrmp
/m/0l15f_	/music/instrument/family	/m/085jw
/m/072hx4	/film/film/release_date_s./film/film_regional_release_date/film_release_region	/m/06qd3
/m/04pf4r	/people/person/spouse_s./people/marriage/type_of_union	/m/04ztj
/m/02_xgp2	/education/educational_degree/people_with_this_degree./education/education/major_field_of_study	/m/01lj9
/m/04yywz	/film/actor/film./film/performance/film	/m/0140g4
/m/05lb30	/award/award_winner/awards_won./award/award_honor/award_winner	/m/03zqc1
/m/028qdb	/award/award_winner/awards_won./award/award_honor/award_winner	/m/04dqdk
/m/02k_4g	/award/award_winning_work/awards_won./award/award_honor/award_winner	/m/015qyf
/m/0ym1n	/education/educational_institution/students_graduates./education/education/student	/m/03k545
/m/01l78d	/award/award_category/winners./award/award_honor/award_winner	/m/0l6qt
/m/03ntbmw	/award/award_winning_work/awards_won./award/award_honor/award_winner	/m/0633p0
/m/015jr	/location/location/contains	/m/01d26y
/m/04f7c55	/people/person/languages	/m/02h40lc
/m/073hmq	/award/award_ceremony/awards_presented./award/award_honor/award_winner	/m/09d5d5
/m/0l14md	/music/performance_role/regular_performances./music/group_membership/group	/m/04r1t
/m/02s6sh	/music/artist/contribution./music/recording_contribution/performance_role	/m/0l14md
/m/0bv8h2	/film/film/language	/m/02h40lc
/m/05zdk2	/people/person/spouse_s./people/marriage/type_of_union	/m/04ztj
/m/09qj50	/award/award_category/nominees./award/award_nomination/nominated_for	/m/0hr41p6
/m/01h1b	/people/person/gender	/m/05zppz
/m/02qtywd	/award/award_nominee/award_nominations./award/award_nomination/award	/m/02nhxf
/m/0jym0	/film/film/language	/m/02h40lc
/m/0pj8m	/people/person/spouse_s./people/marriage/type_of_union	/m/04ztj
/m/01sgl	/olympics/olympic_sport/athletes./olympics/olympic_athlete_affiliation/olympics	/m/0lbd9
/m/0h1cdwq	/film/film/language	/m/02h40lc
/m/04sylm	/education/educational_institution/students_graduates./education/education/student	/m/05_swj
/m/0b1f49	/award/award_nominee/award_nominations./award/award_nomination/award_nominee	/m/0c7t58
/m/01vttb9	/people/person/gender	/m/05zppz
/m/01qqtr	/award/award_winner/awards_won./award/award_honor/award_winner	/m/02mt4k
/m/04fhxp	/film/actor/film./film/performance/film	/m/0pvms
/m/05mt_q	/award/award_nominee/award_nominations./award/award_nomination/award_nominee	/m/067nsm
/m/0336mc	/film/actor/film./film/performance/film	/m/01vw8k
/m/017jd9	/film/film/release_date_s./film/film_regional_release_date/film_release_region	/m/0154j
/m/0151xv	/award/award_nominee/award_nominations./award/award_nomination/award	/m/04kxsb
/m/05kh_	/people/person/religion	/m/0c8wxp
/m/017z88	/education/educational_institution/students_graduates./education/education/student	/m/02_jkc
/m/03f1r6t	/people/person/religion	/m/0c8wxp
/m/04ztj	/people/marriage_union_type/unions_of_this_type./people/marriage/location_of_ceremony	/m/0f485
/m/037ls6	/food/food/nutrients./food/nutrition_fact/nutrient	/m/025s7x6
/m/0b1f49	/award/award_nominee/award_nominations./award/award_nomination/award	/m/040njc
/m/096lf_	/people/person/spouse_s./people/marriage/type_of_union	/m/04ztj
/m/0hn10	/media_common/netflix_genre/titles	/m/01qbg5
/m/03j76b	/soccer/football_team/current_roster./sports/sports_team_roster/position	/m/0dgrmp
/m/017jd9	/award/award_winning_work/awards_won./award/award_honor/award_winner	/m/015t56
/m/0gj9qxr	/film/film/release_date_s./film/film_regional_release_date/film_release_region	/m/06t2t
/m/01679d	/music/performance_role/track_performances./music/track_contribution/role	/m/01xqw
/m/01h4rj	/film/actor/film./film/performance/film	/m/0k54q
/m/05lb65	/award/award_winner/awards_won./award/award_honor/award_winner	/m/05lb87
/m/030znt	/award/award_nominee/award_nominations./award/award_nomination/nominated_for	/m/03ln8b
/m/066l3y	/film/actor/dubbing_performances./film/dubbing_performance/language	/m/02h40lc
/m/04vn5	/sports/professional_sports_team/draft_picks./sports/sports_league_draft_pick/draft	/m/02qw1zx
/m/04yywz	/film/actor/film./film/performance/film	/m/0cf08
/m/05sy_5	/film/film/music	/m/07q1v4
/m/011ywj	/film/film/genre	/m/0hn10
/m/0jt90f5	/influence/influence_node/influenced_by	/m/06d6y
/m/032wdd	/award/award_winner/awards_won./award/award_honor/award_winner	/m/049k07
/m/0b_dy	/award/award_nominee/award_nominations./award/award_nomination/nominated_for	/m/0c_j9x
/m/06sks6	/olympics/olympic_games/sports	/m/018w8
/m/030_1m	/film/film_distributor/films_distributed./film/film_film_distributor_relationship/film	/m/0pk1p
/m/01hww_	/music/performance_role/regular_performances./music/group_membership/role	/m/01xqw
/m/036jb	/people/person/gender	/m/05zppz
/m/04h68j	/people/person/gender	/m/05zppz
/m/025m8y	/award/award_category/winners./award/award_honor/ceremony	/m/0gx1673
/m/0c8hct	/people/person/profession	/m/0np9r
/m/0h0wd9	/film/film/genre	/m/02l7c8
/m/072hx4	/film/film/release_date_s./film/film_regional_release_date/film_release_region	/m/06t2t
/m/015_30	/people/person/gender	/m/05zppz
/m/023r2x	/music/performance_role/track_performances./music/track_contribution/role	/m/011_6p
/m/04gzd	/location/location/adjoin_s./location/adjoining_relationship/adjoins	/m/04g5k
/m/01kwsg	/film/actor/film./film/performance/film	/m/0qm9n
/m/0336mc	/base/popstra/celebrity/dated./base/popstra/dated/participant	/m/03_6y
/m/016ywb	/film/film/genre	/m/04xvh5
/m/02x4x18	/award/award_category/nominees./award/award_nomination/nominated_for	/m/02yxbc
/m/01kt17	/award/award_nominee/award_nominations./award/award_nomination/award	/m/09sb52
/m/0c9d9	/people/person/nationality	/m/0f8l9c
/m/02wk_43	/award/award_winner/awards_won./award/award_honor/award_winner	/m/06w58f
/m/01s9ftn	/people/person/profession	/m/0np9r
/m/03hp2y1	/film/film/genre	/m/04t36
/m/0bth54	/film/film/film_format	/m/017fx5
/m/028tv0	/music/performance_role/regular_performances./music/group_membership/role	/m/06w87
/m/04gzd	/organization/organization_member/member_of./organization/organization_membership/organization	/m/02jxk
/m/0p9qb	/people/person/gender	/m/05zppz
/m/011_6p	/music/performance_role/regular_performances./music/group_membership/role	/m/0g33q
/m/0cp0ph6	/film/film/release_date_s./film/film_regional_release_date/film_release_region	/m/06t2t
/m/02kxbwx	/award/award_nominee/award_nominations./award/award_nomination/award	/m/040njc
/m/04yywz	/people/person/gender	/m/05zppz
/m/04ktcgn	/award/award_nominee/award_nominations./award/award_nomination/nominated_for	/m/0pc62
/m/07nxnw	/film/film/language	/m/02h40lc
/m/03m8lq	/celebrities/celebrity/sexual_relationships./celebrities/romantic_relationship/celebrity	/m/0mdqp
/m/0pj8m	/award/award_nominee/award_nominations./award/award_nomination/nominated_for	/m/0209hj
/m/0ccck7	/film/film/language	/m/02h40lc
/m/015pvh	/award/award_nominee/award_nominations./award/award_nomination/award	/m/09sb52
/m/014mlp	/education/educational_degree/people_with_this_degree./education/education/student	/m/0prfz
/m/0dgrmp	/sports/sports_position/players./sports/sports_team_roster/team	/m/03ff65
/m/016ywb	/film/film/story_by	/m/081k8
/m/0l14md	/music/instrument/instrumentalists	/m/01dw_f
/m/01p3ty	/film/film/release_date_s./film/film_regional_release_date/film_release_region	/m/0f8l9c
/m/01sgl	/olympics/olympic_sport/athletes./olympics/olympic_athlete_affiliation/country	/m/082fr
/m/010xjr	/award/award_nominee/award_nominations./award/award_nomination/award	/m/09sb52
/m/07s9rl0	/media_common/netflix_genre/titles	/m/02d413
/m/0h7x	/organization/organization_member/member_of./organization/organization_membership/organization	/m/02jxk
/m/05bnq3j	/people/person/profession	/m/0dxtg
/m/0jbp0	/people/person/spouse_s./people/marriage/type_of_union	/m/04ztj
/m/01qbl	/music/performance_role/track_performances./music/track_contribution/role	/m/0l14qv
/m/0d05w3	/film/film_subject/films	/m/0bs5k8r
/m/02rdxsh	/award/award_category/nominees./award/award_nomination/nominated_for	/m/04lqvly
/m/02rxbmt	/award/award_nominee/award_nominations./award/award_nomination/award	/m/0gq6s3
/m/04wzr	/base/localfood/seasonal_month/produce_available./base/localfood/produce_availability/seasonal_months	/m/02xx5
/m/09f6b	/olympics/olympic_sport/athletes./olympics/olympic_athlete_affiliation/country	/m/04g5k
/m/01vrlqd	/award/award_nominee/award_nominations./award/award_nomination/nominated_for	/m/063hp4
/m/0l14md	/music/performance_role/regular_performances./music/group_membership/group	/m/01jcxwp
/m/09sb52	/award/award_category/winners./award/award_honor/award_winner	/m/09yhzs
/m/07qg8v	/film/film/language	/m/064_8sq
/m/05cx7x	/award/award_nominee/award_nominations./award/award_nomination/award_nominee	/m/03_6y
/m/01wdcxk	/people/person/spouse_s./people/marriage/type_of_union	/m/04ztj
/m/0d0vqn	/organization/organization_member/member_of./organization/organization_membership/organization	/m/02jxk
/m/014j1m	/food/food/nutrients./food/nutrition_fact/nutrient	/m/01sh2
/m/09qj50	/award/award_category/nominees./award/award_nomination/nominated_for	/m/0431v3
/m/04kxsb	/award/award_category/nominees./award/award_nomination/nominated_for	/m/011yph
/m/0x67	/people/ethnicity/people	/m/027_sn
/m/01x209s	/film/actor/film./film/performance/film	/m/0ccd3x
/m/02h4rq6	/education/educational_degree/people_with_this_degree./education/education/institution	/m/02pptm
/m/0k54q	/film/film/production_companies	/m/016tt2
/m/0jq27	/location/capital_of_administrative_division/capital_of./location/administrative_division_capital_relationship/administrative_division	/m/0lwkz
/m/05p09zm	/award/award_category/nominees./award/award_nomination/nominated_for	/m/033f8n
/m/015pvh	/award/award_nominee/award_nominations./award/award_nomination/award_nominee	/m/06bzwt
/m/065jlv	/award/award_nominee/award_nominations./award/award_nomination/award_nominee	/m/02l4pj
/m/014mlp	/education/educational_degree/people_with_this_degree./education/education/institution	/m/03bnd9
/m/05g8pg	/film/film/country	/m/0d05w3
/m/03q2t9	/people/person/employment_history./business/employment_tenure/company	/m/05s34b
/m/03772	/award/award_nominee/award_nominations./award/award_nomination/award	/m/039yzf
/m/01kc4s	/soccer/football_team/current_roster./soccer/football_roster_position/position	/m/0dgrmp
/m/03k545	/people/person/spouse_s./people/marriage/type_of_union	/m/04ztj
/m/09th87	/sports/sports_league_draft/picks./sports/sports_league_draft_pick/school	/m/01ptt7
/m/0c6vcj	/award/award_ceremony/awards_presented./award/award_honor/award_winner	/m/0gv40
/m/07qg8v	/film/film/release_date_s./film/film_regional_release_date/film_release_region	/m/0f8l9c
/m/03jvmp	/award/award_nominee/award_nominations./award/award_nomination/nominated_for	/m/03cv_gy
/m/0789_m	/award/award_category/winners./award/award_honor/award_winner	/m/0p9qb
/m/0gs96	/award/award_category/nominees./award/award_nomination/nominated_for	/m/0prh7
/m/02wgk1	/film/film/genre	/m/07s9rl0
/m/02qyntr	/award/award_category/nominees./award/award_nomination/nominated_for	/m/06cm5
/m/019pm_	/base/popstra/celebrity/dated./base/popstra/dated/participant	/m/01p4vl
/m/02704ff	/film/film/written_by	/m/02kxbwx
/m/047xyn	/award/award_category/winners./award/award_honor/award_winner	/m/014ps4
/m/0_b9f	/film/film/country	/m/0f8l9c
/m/0g2c8	/award/hall_of_fame/inductees./award/hall_of_fame_induction/inductee	/m/011vx3
/m/0gkz15s	/film/film/release_date_s./film/film_regional_release_date/film_release_region	/m/04gzd
/m/04l58n	/sports/sports_team/colors	/m/038hg
/m/0c5tl	/influence/influence_node/influenced_by	/m/0j3v
/m/01vsksr	/people/person/gender	/m/05zppz
/m/01w1kyf	/award/award_nominee/award_nominations./award/award_nomination/award	/m/0gvx_
/m/04hcw	/user/alexander/philosophy/philosopher/interests	/m/02jcc
/m/03l6bs	/education/educational_institution/school_type	/m/04qbv
/m/01l9v7n	/award/award_nominee/award_nominations./award/award_nomination/award	/m/054krc
/m/021vwt	/award/award_nominee/award_nominations./award/award_nomination/award_nominee	/m/02ch1w
/m/01n7q	/location/location/contains	/m/0r1yc
/m/0n2bh	/tv/tv_program/languages	/m/02h40lc
/m/01v1d8	/music/performance_role/track_performances./music/track_contribution/role	/m/0l14qv
/m/0bw87	/film/actor/film./film/performance/film	/m/03hj3b3
/m/0gk4g	/people/cause_of_death/people	/m/012vct
/m/06ryl	/location/country/official_language	/m/02h40lc
/m/02qlp4	/film/film/other_crew./film/film_crew_gig/film_crew_role	/m/09vw2b7
/m/0401sg	/film/film/release_date_s./film/film_regional_release_date/film_release_region	/m/0f8l9c
/m/0phrl	/tv/tv_program/regular_cast./tv/regular_tv_appearance/actor	/m/05r5w
/m/09qwmm	/award/award_category/nominees./award/award_nomination/nominated_for	/m/0bnzd
/m/059dn	/user/ktrueman/default_domain/international_organization/member_states	/m/0154j
/m/0382m4	/award/award_winner/awards_won./award/award_honor/award_winner	/m/03_l8m
/m/025m8y	/award/award_category/winners./award/award_honor/award_winner	/m/01v0fn1
/m/06chf	/people/person/spouse_s./people/marriage/type_of_union	/m/04ztj
/m/02jxk	/user/ktrueman/default_domain/international_organization/member_states	/m/06npd
/m/02qw1zx	/sports/sports_league_draft/picks./sports/sports_league_draft_pick/school	/m/0bx8pn
/m/01hw5kk	/film/film/genre	/m/0dz8b
/m/087vz	/military/military_combatant/military_conflicts./military/military_combatant_group/combatants	/m/05b4w
/m/0f8l9c	/olympics/olympic_participating_country/athletes./olympics/olympic_athlete_affiliation/olympics	/m/0jhn7
/m/0bpm4yw	/film/film/film_format	/m/017fx5
/m/0gs96	/award/award_category/winners./award/award_honor/ceremony	/m/0fz2y7
/m/0419kt	/film/film/other_crew./film/film_crew_gig/film_crew_role	/m/01pvkk
/m/0408m53	/film/film/other_crew./film/film_crew_gig/film_crew_role	/m/0ch6mp2
/m/09n4nb	/award/award_ceremony/awards_presented./award/award_honor/award_winner	/m/01wj18h
/m/07jmgz	/people/person/profession	/m/0dxtg
/m/0287477	/film/film/production_companies	/m/05rrtf
/m/042kg	/people/person/gender	/m/05zppz
/m/0227tr	/award/award_nominee/award_nominations./award/award_nomination/award_nominee	/m/06g2d1
/m/0cjdk	/tv/tv_network/programs./tv/tv_network_duration/program	/m/01b7h8
/m/02x4x18	/award/award_category/nominees./award/award_nomination/nominated_for	/m/032_wv
/m/047gpsd	/film/film/other_crew./film/film_crew_gig/film_crew_role	/m/01pvkk
/m/07c72	/tv/tv_program/languages	/m/02h40lc
/m/049_zz	/people/person/spouse_s./people/marriage/type_of_union	/m/04ztj
/m/01xlqd	/film/film/release_date_s./film/film_regional_release_date/film_release_region	/m/0d0vqn
/m/0h5jg5	/people/person/gender	/m/05zppz
/m/06qd3	/olympics/olympic_participating_country/athletes./olympics/olympic_athlete_affiliation/olympics	/m/06sks6
/m/02wd48	/people/person/spouse_s./people/marriage/type_of_union	/m/04ztj
/m/03b0q4	/people/person/gender	/m/05zppz
/m/01xhh5	/people/ethnicity/people	/m/02y9ln
/m/06c1y	/location/location/time_zones	/m/03plfd
/m/0bn9sc	/soccer/football_player/current_team./sports/sports_team_roster/team	/m/03fhml
/m/0b_6pv	/time/event/locations	/m/013yq
/m/024dw0	/music/artist/track_contributions./music/track_contribution/role	/m/05842k
/m/0473rc	/film/film/other_crew./film/film_crew_gig/film_crew_role	/m/0ch6mp2
/m/0209hj	/film/film/genre	/m/03bxz7
/m/0q9t7	/people/person/profession	/m/0dxtg
/m/015vq_	/people/person/spouse_s./people/marriage/type_of_union	/m/04ztj
/m/05mxw33	/award/award_winner/awards_won./award/award_honor/award_winner	/m/01svw8n
/m/0prh7	/film/film/story_by	/m/081k8
/m/031786	/film/film/other_crew./film/film_crew_gig/film_crew_role	/m/0ch6mp2
/m/05sns6	/film/film/film_format	/m/07fb8_
/m/02l96k	/music/genre/artists	/m/0qmny
/m/0yls9	/organization/organization/headquarters./location/mailing_address/state_province_region	/m/0jt5zcn
/m/02v3yy	/people/person/spouse_s./people/marriage/type_of_union	/m/04ztj
/m/023361	/people/person/gender	/m/05zppz
/m/015gjr	/people/person/gender	/m/05zppz
/m/040njc	/award/award_category/nominees./award/award_nomination/nominated_for	/m/03hj3b3
/m/027l0b	/award/award_winner/awards_won./award/award_honor/award_winner	/m/052hl
/m/02c7lt	/people/person/spouse_s./people/marriage/type_of_union	/m/04ztj
/m/0fht9f	/sports/sports_team/roster./american_football/football_historical_roster_position/position_s	/m/0bgv4g
/m/0x67	/people/ethnicity/people	/m/01vw26l
/m/028tv0	/music/performance_role/regular_performances./music/group_membership/group	/m/0k1bs
/m/06g2d1	/people/person/profession	/m/016z4k
/m/0qm9n	/film/film/release_date_s./film/film_regional_release_date/film_release_region	/m/0f8l9c
/m/02hh8j	/people/person/place_of_birth	/m/05qtj
/m/040njc	/award/award_category/nominees./award/award_nomination/nominated_for	/m/0cz_ym
/m/054ky1	/award/award_category/winners./award/award_honor/award_winner	/m/012vby
/m/023361	/award/award_nominee/award_nominations./award/award_nomination/award	/m/0gqz2
/m/03rtmz	/government/legislative_session/members./government/government_position_held/district_represented	/m/05fjy
/m/016mhd	/film/film/country	/m/0f8l9c
/m/0233bn	/film/film/release_date_s./film/film_regional_release_date/film_release_region	/m/05b4w
/m/070j61	/award/award_nominee/award_nominations./award/award_nomination/award_nominee	/m/046b0s
/m/05k7sb	/location/statistical_region/religions./location/religion_percentage/religion	/m/0c8wxp
/m/037jz	/people/person/religion	/m/0c8wxp
/m/0dq626	/film/film/genre	/m/07s9rl0
/m/03818y	/education/educational_institution/colors	/m/036k5h
/m/01hqhm	/film/film/genre	/m/07s9rl0
/m/01svw8n	/music/artist/origin	/m/0r172
/m/076xkps	/film/film/other_crew./film/film_crew_gig/film_crew_role	/m/0ch6mp2
/m/02qmncd	/award/award_nominee/award_nominations./award/award_nomination/award	/m/025m8y
/m/04bgy	/people/person/profession	/m/01c72t
/m/01kckd	/soccer/football_team/current_roster./sports/sports_team_roster/position	/m/0dgrmp
/m/0b_fw	/people/person/spouse_s./people/marriage/type_of_union	/m/04ztj
/m/0cw51	/base/biblioness/bibs_location/country	/m/03rk0
/m/0dgrmp	/sports/sports_position/players./sports/sports_team_roster/team	/m/02rh_0
/m/02n4kr	/media_common/netflix_genre/titles	/m/0c_j9x
/m/02qyntr	/award/award_category/nominees./award/award_nomination/nominated_for	/m/0p7pw
/m/0h336	/people/person/gender	/m/05zppz
/m/0fw9vx	/sports/sports_team/sport	/m/018w8
/m/03d0d7	/soccer/football_team/current_roster./sports/sports_team_roster/position	/m/0dgrmp
/m/0431v3	/tv/tv_program/genre	/m/0vgkd
/m/01kwsg	/award/award_nominee/award_nominations./award/award_nomination/award	/m/09sdmz
/m/06bd5j	/film/film/genre	/m/02n4kr
/m/04nlb94	/film/film/other_crew./film/film_crew_gig/film_crew_role	/m/01pvkk
/m/01q940	/music/record_label/artist	/m/01x66d
/m/012w70	/media_common/netflix_genre/titles	/m/05g8pg
/m/0194zl	/film/film/genre	/m/02l7c8
/m/0154j	/olympics/olympic_participating_country/medals_won./olympics/olympic_medal_honor/olympics	/m/018ljb
/m/0gk4g	/people/cause_of_death/people	/m/06qn87
/m/01l78d	/award/award_category/winners./award/award_honor/award_winner	/m/02645b
/m/01p4vl	/people/person/gender	/m/05zppz
/m/016tt2	/film/film_distributor/films_distributed./film/film_film_distributor_relationship/film	/m/08s6mr
/m/0b1f49	/people/person/gender	/m/05zppz
/m/0cqhk0	/award/award_category/winners./award/award_honor/award_winner	/m/04cl1
/m/0gk4g	/people/cause_of_death/people	/m/017r2
/m/03cglm	/award/award_nominee/award_nominations./award/award_nomination/nominated_for	/m/0cz_ym
/m/03hy3g	/people/person/gender	/m/05zppz
/m/01_vfy	/film/director/film	/m/04j13sx
/m/0fj52s	/food/food/nutrients./food/nutrition_fact/nutrient	/m/03d49
/m/0bpm4yw	/film/film/release_date_s./film/film_regional_release_date/film_release_region	/m/0f8l9c
/m/0143wl	/people/person/languages	/m/02h40lc
/m/05kms	/music/performance_role/track_performances./music/track_contribution/role	/m/01vdm0
/m/0jhz_	/location/location/contains	/m/0ggh3
/m/01kff7	/film/film/other_crew./film/film_crew_gig/film_crew_role	/m/01pvkk
/m/013yq	/location/location/contains	/m/03818y
/m/05zvq6g	/award/award_category/nominees./award/award_nomination/nominated_for	/m/02q6gfp
/m/0h1cdwq	/film/film/release_date_s./film/film_regional_release_date/film_release_region	/m/0jgd
/m/04vr_f	/film/film/other_crew./film/film_crew_gig/film_crew_role	/m/09vw2b7
/m/03l6bs	/location/location/time_zones	/m/02fqwt
/m/0d7wh	/people/ethnicity/people	/m/04pf4r
/m/043n0v_	/film/film/country	/m/0d05w3
/m/03qnc6q	/film/film/other_crew./film/film_crew_gig/film_crew_role	/m/01pvkk
/m/02x258x	/award/award_category/nominees./award/award_nomination/nominated_for	/m/011wtv
/m/02w4v	/music/genre/artists	/m/0qf3p
/m/09lhln	/sports/pro_athlete/teams./sports/sports_team_roster/team	/m/02_lt
/m/070yzk	/award/award_nominee/award_nominations./award/award_nomination/award_nominee	/m/0382m4
/m/0x67	/people/ethnicity/people	/m/01d1st
/m/028tv0	/music/performance_role/regular_performances./music/group_membership/group	/m/01w5n51
/m/09p0ct	/film/film/genre	/m/02l7c8
/m/0mkg	/music/instrument/instrumentalists	/m/028qdb
/m/02knxx	/people/cause_of_death/people	/m/01y8cr
/m/0bykpk	/film/film/genre	/m/06lbpz
/m/042xrr	/award/award_nominee/award_nominations./award/award_nomination/award_nominee	/m/06g2d1
/m/07c98	/base/aareas/schema/administrative_area/administrative_parent	/m/03rk0
/m/0dfw0	/film/film/language	/m/02h40lc
/m/022_lg	/award/award_nominee/award_nominations./award/award_nomination/award	/m/040njc
/m/06bzwt	/award/award_nominee/award_nominations./award/award_nomination/award_nominee	/m/0184jc
/m/0x67	/people/ethnicity/people	/m/055c8
/m/01g969	/base/popstra/celebrity/dated./base/popstra/dated/participant	/m/0cwtm
/m/044prt	/people/person/profession	/m/012t_z
/m/04dqdk	/people/person/profession	/m/016z4k
/m/02kxjx	/base/culturalevent/event/entity_involved	/m/088q1s
/m/020d5	/location/country/form_of_government	/m/06cx9
/m/0h0wd9	/film/film/produced_by	/m/03thw4
/m/0cv2m	/base/aareas/schema/administrative_area/administrative_parent	/m/03rk0
/m/0gvvf4j	/film/film/other_crew./film/film_crew_gig/film_crew_role	/m/0ch6mp2
/m/036hf4	/film/actor/film./film/performance/film	/m/0bh8yn3
/m/0_b9f	/film/film/genre	/m/02l7c8
/m/0h3mh3q	/tv/tv_program/languages	/m/02h40lc
/m/012xdf	/people/person/place_of_birth	/m/0hptm
/m/01xqw	/music/performance_role/track_performances./music/track_contribution/role	/m/050rj
/m/016lh0	/people/person/gender	/m/05zppz
/m/0d0vqn	/organization/organization_founder/organizations_founded	/m/01rz1
/m/0cfhfz	/film/film/language	/m/02h40lc
/m/01c22t	/film/film/release_date_s./film/film_regional_release_date/film_release_region	/m/07ylj
/m/06t2t	/travel/travel_destination/climate./travel/travel_destination_monthly_climate/month	/m/028kb
/m/01n7q	/location/location/partially_contains	/m/0db94
/m/026p_bs	/film/film/release_date_s./film/film_regional_release_date/film_release_region	/m/0d0vqn
/m/0jmh7	/sports/sports_team/sport	/m/018w8
/m/0l14md	/music/performance_role/regular_performances./music/group_membership/group	/m/01qqwp9
/m/01gssm	/government/legislative_session/members./government/government_position_held/legislative_sessions	/m/01gsrl
/m/0mbs8	/award/award_nominee/award_nominations./award/award_nomination/award	/m/086vfb
/m/040njc	/award/award_category/nominees./award/award_nomination/nominated_for	/m/0jym0
/m/05ljv7	/music/performance_role/regular_performances./music/group_membership/role	/m/0l14qv
/m/01679d	/music/instrument/instrumentalists	/m/03ryks
/m/08kp57	/people/person/nationality	/m/03rk0
/m/050llt	/award/award_nominee/award_nominations./award/award_nomination/nominated_for	/m/09fn1w
/m/02ktrs	/tv/tv_personality/tv_regular_appearances./tv/tv_regular_personal_appearance/program	/m/01b7h8
/m/0jvtp	/people/person/spouse_s./people/marriage/type_of_union	/m/04ztj
/m/0hsn_	/film/actor/film./film/performance/film	/m/064r97z
/m/04fc6c	/music/record_label/artist	/m/0gbwp
/m/04nl83	/film/film/genre	/m/03bxz7
/m/05kms	/music/performance_role/regular_performances./music/group_membership/group	/m/02vgh
/m/06rmdr	/award/award_winning_work/awards_won./award/award_honor/award_winner	/m/016tt2
/m/0nhr5	/location/location/adjoin_s./location/adjoining_relationship/adjoins	/m/0nhmw
/m/01p3ty	/film/film/production_companies	/m/099ks0
/m/06c44	/people/person/gender	/m/05zppz
/m/02p65p	/award/award_winner/awards_won./award/award_honor/award_winner	/m/04smkr
/m/0g8st4	/people/person/gender	/m/05zppz
/m/064_8sq	/language/human_language/countries_spoken_in	/m/0f8l9c
/m/05p09dd	/film/film/other_crew./film/film_crew_gig/film_crew_role	/m/09vw2b7
/m/0l15bq	/music/performance_role/track_performances./music/track_contribution/role	/m/06rvn
/m/01n7q	/location/location/contains	/m/01c40n
/m/016tt2	/film/film_distributor/films_distributed./film/film_film_distributor_relationship/film	/m/0dfw0
/m/0lwkz	/location/administrative_division/country	/m/0f8l9c
/m/05nmg_	/soccer/football_team/current_roster./sports/sports_team_roster/position	/m/0dgrmp
/m/05qsxy	/award/award_nominee/award_nominations./award/award_nomination/award_nominee	/m/0265v21
/m/01t265	/people/person/religion	/m/0c8wxp
/m/01pr6q7	/people/deceased_person/place_of_burial	/m/018mmj
/m/03msf	/location/location/contains	/m/01sm9v
/m/04f7c55	/people/person/profession	/m/016z4k
/m/016ywb	/award/award_winning_work/awards_won./award/award_honor/award	/m/0gs96
/m/07jq_	/film/film_subject/films	/m/02q0k7v
/m/0yzvw	/film/film/release_date_s./film/film_regional_release_date/film_release_region	/m/0f8l9c
/m/0343h	/award/award_nominee/award_nominations./award/award_nomination/award_nominee	/m/0kx4m
/m/02_xgp2	/education/educational_degree/people_with_this_degree./education/education/institution	/m/01lhdt
/m/01vzx45	/people/person/spouse_s./people/marriage/type_of_union	/m/04ztj
/m/047bynf	/film/film/genre	/m/02l7c8
/m/070yzk	/people/person/languages	/m/02h40lc
/m/0d8lm	/music/performance_role/regular_performances./music/group_membership/role	/m/0l14md
/m/071ywj	/film/actor/film./film/performance/film	/m/0gkz15s
/m/05ljv7	/music/performance_role/regular_performances./music/group_membership/role	/m/0l14md
/m/054ky1	/award/award_category/winners./award/award_honor/award_winner	/m/0b_fw
/m/01nds	/organization/organization/headquarters./location/mailing_address/citytown	/m/07dfk
/m/0x67	/people/ethnicity/people	/m/011vx3
/m/050rj	/music/performance_role/track_performances./music/track_contribution/role	/m/01v1d8
/m/01vrlr4	/people/person/profession	/m/0dxtg
/m/070g7	/film/film/language	/m/02h40lc
/m/0171lb	/people/person/gender	/m/05zppz
/m/03jldb	/people/person/languages	/m/02h40lc
/m/03c_pqj	/people/person/place_of_birth	/m/0fl2s
/m/01hcj2	/people/person/spouse_s./people/marriage/type_of_union	/m/04ztj
/m/01xdf5	/award/award_nominee/award_nominations./award/award_nomination/award_nominee	/m/05bnq3j
/m/0cc5tgk	/award/award_winner/awards_won./award/award_honor/award_winner	/m/01w58n3
/m/07ldhs	/people/person/religion	/m/0c8wxp
/m/049gc	/people/person/spouse_s./people/marriage/type_of_union	/m/04ztj
/m/0mdqp	/award/award_nominee/award_nominations./award/award_nomination/nominated_for	/m/034qrh
/m/09qwmm	/award/award_category/nominees./award/award_nomination/nominated_for	/m/011yg9
/m/02h4rq6	/education/educational_degree/people_with_this_degree./education/education/major_field_of_study	/m/037mh8
/m/0qmfz	/film/film/genre	/m/07s9rl0
/m/0hn821n	/award/award_ceremony/awards_presented./award/award_honor/award_winner	/m/05bnq3j
/m/045zr	/people/person/profession	/m/0n1h
/m/01txts	/music/record_label/artist	/m/0qf3p
/m/087v17	/award/award_nominee/award_nominations./award/award_nomination/nominated_for	/m/0bj25
/m/02b07b	/organization/organization/headquarters./location/mailing_address/citytown	/m/07dfk
/m/049k07	/people/person/spouse_s./people/marriage/type_of_union	/m/04ztj
/m/09sb52	/award/award_category/nominees./award/award_nomination/nominated_for	/m/0bnzd
/m/09wj5	/film/actor/film./film/performance/film	/m/0ndwt2w
/m/0gs96	/award/award_category/nominees./award/award_nomination/nominated_for	/m/05dmmc
/m/0281rp	/base/biblioness/bibs_location/state	/m/01n7q
/m/0f8l9c	/olympics/olympic_participating_country/athletes./olympics/olympic_athlete_affiliation/olympics	/m/018ljb
/m/02x02kb	/people/person/place_of_birth	/m/0hj6h
/m/049gc	/people/person/profession	/m/0dxtg
/m/01w02sy	/people/person/profession	/m/0n1h
/m/0gkxgfq	/award/award_ceremony/awards_presented./award/award_honor/award_winner	/m/049_zz
/m/03ln8b	/award/award_winning_work/awards_won./award/award_honor/award	/m/0cqhk0
/m/01rr31	/organization/organization/headquarters./location/mailing_address/state_province_region	/m/0jhwd
/m/0l6qt	/people/person/profession	/m/0dxtg
/m/01qbl	/music/performance_role/track_performances./music/track_contribution/role	/m/0myk8
/m/02607j	/organization/organization/headquarters./location/mailing_address/citytown	/m/02zp1t
/m/03rk0	/location/location/contains	/m/03czqs
/m/04gfy7	/people/ethnicity/people	/m/0311wg
/m/0l15f_	/music/performance_role/guest_performances./music/recording_contribution/performance_role	/m/0l14md
/m/030155	/music/artist/track_contributions./music/track_contribution/role	/m/01vdm0
/m/0140g4	/award/award_winning_work/awards_won./award/award_honor/honored_for	/m/0946bb
/m/03yvf2	/film/film/other_crew./film/film_crew_gig/film_crew_role	/m/0ch6mp2
/m/06x4l_	/music/artist/track_contributions./music/track_contribution/role	/m/05842k
/m/017jd9	/award/award_winning_work/awards_won./award/award_honor/award	/m/0fhpv4
/m/0309lm	/award/award_nominee/award_nominations./award/award_nomination/award_nominee	/m/0315q3
/m/01jpmpv	/people/person/profession	/m/01c72t
/m/0127xk	/people/person/gender	/m/05zppz
/m/027cxsm	/award/award_nominee/award_nominations./award/award_nomination/award_nominee	/m/035sc2
/m/053y0s	/music/artist/track_contributions./music/track_contribution/role	/m/01vdm0
/m/03cs_xw	/people/person/gender	/m/05zppz
/m/02w9895	/award/award_winner/awards_won./award/award_honor/award_winner	/m/0clvcx
/m/05cx7x	/award/award_nominee/award_nominations./award/award_nomination/award_nominee	/m/01p4vl
/m/082brv	/music/artist/track_contributions./music/track_contribution/role	/m/0l14qv
/m/023kzp	/award/award_nominee/award_nominations./award/award_nomination/award	/m/0bfvd4
/m/01w_10	/award/award_winner/awards_won./award/award_honor/award_winner	/m/049_zz
/m/04ztj	/people/marriage_union_type/unions_of_this_type./people/marriage/location_of_ceremony	/m/094jv
/m/04xg2f	/film/film/other_crew./film/film_crew_gig/film_crew_role	/m/09vw2b7
/m/0l14md	/music/performance_role/guest_performances./music/recording_contribution/performance_role	/m/03gvt
/m/021vwt	/people/person/gender	/m/05zppz
/m/0234_c	/education/educational_institution/students_graduates./education/education/major_field_of_study	/m/05qjc
/m/02zj61	/people/person/profession	/m/01c72t
/m/04q7r	/music/performance_role/regular_performances./music/group_membership/role	/m/0l14md
/m/03yvf2	/film/film/release_date_s./film/film_regional_release_date/film_regional_debut_venue	/m/07zmj
/m/02s5v5	/award/award_nominee/award_nominations./award/award_nomination/nominated_for	/m/03cv_gy
/m/07s9rl0	/media_common/netflix_genre/titles	/m/016mhd
/m/0j0pf	/influence/influence_node/peers./influence/peer_relationship/peers	/m/01zkxv
/m/01g969	/award/award_nominee/award_nominations./award/award_nomination/award	/m/05p09zm
/m/06bzwt	/award/award_nominee/award_nominations./award/award_nomination/award_nominee	/m/04wp3s
/m/025ljp	/tv/tv_program/genre	/m/0dm00
/m/017jd9	/award/award_winning_work/awards_won./award/award_honor/award_winner	/m/02h1rt
/m/0cj36c	/award/award_winner/awards_won./award/award_honor/award_winner	/m/083chw
/m/014j1m	/food/food/nutrients./food/nutrition_fact/nutrient	/m/06x4c
/m/059t6d	/award/award_nominee/award_nominations./award/award_nomination/award_nominee	/m/03rgvr
/m/04wg38	/people/person/religion	/m/0c8wxp
/m/02rrsz	/people/person/spouse_s./people/marriage/type_of_union	/m/04ztj
/m/0789_m	/award/award_category/winners./award/award_honor/award_winner	/m/0301bq
/m/0fk98	/base/biblioness/bibs_location/country	/m/03rk0
/m/02b0yz	/soccer/football_team/current_roster./sports/sports_team_roster/position	/m/0dgrmp
/m/011_6p	/music/performance_role/regular_performances./music/group_membership/role	/m/0l14md
/m/06yxd	/location/statistical_region/religions./location/religion_percentage/religion	/m/0c8wxp
/m/0gtvpkw	/film/film/release_date_s./film/film_regional_release_date/film_release_region	/m/0f8l9c
/m/02qkwl	/film/film/other_crew./film/film_crew_gig/film_crew_role	/m/0ch6mp2
/m/0755wz	/award/award_nominee/award_nominations./award/award_nomination/award_nominee	/m/01z7_f
/m/07qg8v	/film/film/country	/m/0f8l9c
/m/03xq0f	/film/film_distributor/films_distributed./film/film_film_distributor_relationship/film	/m/05567m
/m/0xzly	/music/performance_role/regular_performances./music/group_membership/role	/m/0l14md
/m/01vw26l	/film/actor/film./film/performance/film	/m/0bq8tmw
/m/094wz7q	/people/person/gender	/m/05zppz
/m/0335fp	/people/person/gender	/m/05zppz
/m/03sww	/people/person/spouse_s./people/marriage/type_of_union	/m/04ztj
/m/09tkzy	/film/film/genre	/m/07s9rl0
/m/05g3ss	/people/person/places_lived./people/place_lived/location	/m/09f07
/m/02wgk1	/film/film/story_by	/m/079ws
/m/049w1q	/film/film/language	/m/02h40lc
/m/01n7q	/location/location/contains	/m/0qymv
/m/0jt90f5	/people/person/places_lived./people/place_lived/location	/m/0c4kv
/m/014g_s	/people/person/place_of_birth	/m/0qxzd
/m/045zr	/award/award_nominee/award_nominations./award/award_nomination/award_nominee	/m/02qtywd
/m/065jlv	/award/award_nominee/award_nominations./award/award_nomination/award	/m/09sb52
/m/02_jkc	/people/person/gender	/m/05zppz
/m/01v1d8	/music/performance_role/regular_performances./music/group_membership/group	/m/01_wfj
/m/0b455l	/people/person/gender	/m/05zppz
/m/0bqxw	/education/educational_institution/students_graduates./education/education/major_field_of_study	/m/037mh8
/m/02wb6d	/people/person/gender	/m/05zppz
/m/04xfb	/people/person/spouse_s./people/marriage/type_of_union	/m/04ztj
/m/02p65p	/award/award_winner/awards_won./award/award_honor/award_winner	/m/06g2d1
/m/0xnvg	/people/ethnicity/people	/m/0q9t7
/m/02633g	/people/person/gender	/m/05zppz
/m/07s9rl0	/media_common/netflix_genre/titles	/m/016ks5
/m/0kv238	/film/film/other_crew./film/film_crew_gig/film_crew_role	/m/0ch6mp2
/m/02cvp8	/people/person/sibling_s./people/sibling_relationship/sibling	/m/045g4l
/m/0161h5	/award/award_nominee/award_nominations./award/award_nomination/award	/m/0bfvw2
/m/021vwt	/film/actor/film./film/performance/film	/m/02x6dqb
/m/065ydwb	/award/award_winner/awards_won./award/award_honor/award_winner	/m/06w2yp9
/m/01nkt	/food/food/nutrients./food/nutrition_fact/nutrient	/m/02y_3rf
/m/09d5d5	/people/person/spouse_s./people/marriage/type_of_union	/m/04ztj
/m/0jqj5	/film/film/produced_by	/m/02l5rm
/m/0136g9	/award/award_nominee/award_nominations./award/award_nomination/award_nominee	/m/0b4rf3
/m/017b2p	/people/person/places_lived./people/place_lived/location	/m/07dfk
/m/0kv238	/film/film/release_date_s./film/film_regional_release_date/film_release_region	/m/06qd3
/m/0m9v7	/people/person/spouse_s./people/marriage/type_of_union	/m/04ztj
/m/0h7pj	/people/person/gender	/m/05zppz
/m/05g7q	/people/person/spouse_s./people/marriage/type_of_union	/m/04ztj
/m/043t1s	/soccer/football_team/current_roster./sports/sports_team_roster/position	/m/0dgrmp
/m/0fqjhm	/award/award_nominee/award_nominations./award/award_nomination/award_nominee	/m/02bj6k
/m/01wj18h	/award/award_nominee/award_nominations./award/award_nomination/award	/m/02f73b
/m/0h1cdwq	/film/film/release_date_s./film/film_regional_release_date/film_release_region	/m/04gzd
/m/0320jz	/film/actor/film./film/performance/film	/m/048tv9
/m/07l450	/award/award_winning_work/awards_won./award/award_honor/award	/m/04kxsb
/m/08swgx	/award/award_nominee/award_nominations./award/award_nomination/award_nominee	/m/019pm_
/m/029q_y	/base/popstra/celebrity/friendship./base/popstra/friendship/participant	/m/06w6_
/m/09x8ms	/people/person/spouse_s./people/marriage/type_of_union	/m/04ztj
/m/01hvv0	/tv/tv_program/regular_cast./tv/regular_tv_appearance/actor	/m/01r4bps
/m/02qgqt	/award/award_nominee/award_nominations./award/award_nomination/award_nominee	/m/020_95
/m/03q45x	/people/person/spouse_s./people/marriage/type_of_union	/m/04ztj
/m/02hh8j	/people/person/gender	/m/05zppz
/m/02wgk1	/film/film/other_crew./film/film_crew_gig/film_crew_role	/m/0ch6mp2
/m/03_vx9	/people/person/spouse_s./people/marriage/type_of_union	/m/04ztj
/m/01rzqj	/film/actor/film./film/performance/film	/m/0fpkhkz
/m/017z88	/education/educational_institution/students_graduates./education/education/student	/m/04cl1
/m/033qdy	/film/film/genre	/m/09blyk
/m/09sb52	/award/award_category/winners./award/award_honor/award_winner	/m/02qgyv
/m/026yqrr	/award/award_nominee/award_nominations./award/award_nomination/award_nominee	/m/05vzw3
/m/06t2t	/olympics/olympic_participating_country/medals_won./olympics/olympic_medal_honor/olympics	/m/0lbd9
/m/0dc_ms	/film/film/release_date_s./film/film_regional_release_date/film_release_region	/m/05l8y
/m/01ffx4	/film/film/language	/m/02h40lc
/m/0fpzt5	/award/award_nominee/award_nominations./award/award_nomination/award	/m/0262x6
/m/0d7wh	/people/ethnicity/people	/m/02w9895
/m/028tv0	/music/performance_role/regular_performances./music/group_membership/group	/m/0bsj9
/m/01jz6x	/people/person/spouse_s./people/marriage/type_of_union	/m/04ztj
/m/0xzly	/music/performance_role/track_performances./music/track_contribution/role	/m/07brj
/m/01ffx4	/film/film/written_by	/m/05d1dy
/m/0509bl	/award/award_nominee/award_nominations./award/award_nomination/award	/m/09sb52
/m/03_l8m	/award/award_nominee/award_nominations./award/award_nomination/award_nominee	/m/0382m4
/m/09jrf	/people/person/spouse_s./people/marriage/type_of_union	/m/04ztj
/m/07fvf1	/award/award_winner/awards_won./award/award_honor/award_winner	/m/01h910
/m/0b_6pv	/time/event/locations	/m/0f2r6
/m/0kbg6	/people/person/profession	/m/0dxtg
/m/04yc76	/film/film/language	/m/02h40lc
/m/015bpl	/film/film/film_format	/m/07fb8_
/m/027kmrb	/award/award_nominee/award_nominations./award/award_nomination/award	/m/040njc
/m/01d1st	/people/person/spouse_s./people/marriage/type_of_union	/m/04ztj
/m/0311wg	/film/actor/film./film/performance/film	/m/01f7gh
/m/05mt_q	/people/person/gender	/m/05zppz
/m/04ztj	/people/marriage_union_type/unions_of_this_type./people/marriage/location_of_ceremony	/m/0lmgy
/m/0127xk	/award/award_nominee/award_nominations./award/award_nomination/award	/m/0bp_b2
/m/04913k	/sports/sports_team/roster./baseball/baseball_roster_position/position	/m/028c_8
/m/027l0b	/award/award_nominee/award_nominations./award/award_nomination/award	/m/09qvc0
/m/01_0f7	/award/award_winning_work/awards_won./award/award_honor/award_winner	/m/09wj5
/m/07s9rl0	/media_common/netflix_genre/titles	/m/05hjnw
/m/0cj2w	/people/person/profession	/m/01c72t
/m/03hrz	/travel/travel_destination/climate./travel/travel_destination_monthly_climate/month	/m/028kb
/m/04f7c55	/film/actor/film./film/performance/film	/m/04gv3db
/m/09pl3f	/people/person/gender	/m/05zppz
/m/0184jc	/people/person/places_lived./people/place_lived/location	/m/0chgzm
/m/05t7c1	/organization/organization/headquarters./location/mailing_address/citytown	/m/03hrz
/m/073hkh	/award/award_ceremony/awards_presented./award/award_honor/award_winner	/m/0q9t7
/m/0227tr	/award/award_nominee/award_nominations./award/award_nomination/award	/m/09sb52
/m/0djc3s	/people/person/profession	/m/01c72t
/m/017hnw	/organization/organization/headquarters./location/mailing_address/state_province_region	/m/05k7sb
/m/01pw2f1	/base/popstra/celebrity/dated./base/popstra/dated/participant	/m/02v60l
/m/01hb6v	/people/person/place_of_birth	/m/0619_
/m/03gt0c5	/people/person/place_of_birth	/m/022_6
/m/01gsry	/government/legislative_session/members./government/government_position_held/district_represented	/m/06yxd
/m/015pvh	/award/award_nominee/award_nominations./award/award_nomination/award_nominee	/m/04wp3s
/m/06c53w	/people/person/gender	/m/05zppz
/m/0p_pd	/award/award_nominee/award_nominations./award/award_nomination/award	/m/0c422z4
/m/027n4zv	/award/award_winner/awards_won./award/award_honor/award_winner	/m/048q6x
/m/03cv_gy	/tv/tv_program/regular_cast./tv/regular_tv_appearance/actor	/m/06bzwt
/m/01p4vl	/base/popstra/celebrity/canoodled./base/popstra/canoodled/participant	/m/019pm_
/m/059x66	/time/event/instance_of_recurring_event	/m/0g_w
/m/04sry	/people/person/spouse_s./people/marriage/type_of_union	/m/04ztj
/m/023kzp	/award/award_nominee/award_nominations./award/award_nomination/nominated_for	/m/01hqhm
/m/03fw4y	/people/person/employment_history./business/employment_tenure/company	/m/099ks0
/m/05f7w84	/tv/tv_program/regular_cast./tv/regular_tv_appearance/actor	/m/01r4bps
/m/01c22t	/film/film/genre	/m/01zhp
/m/0m9v7	/people/person/profession	/m/0dxtg
/m/0cm2xh	/base/culturalevent/event/entity_involved	/m/05hks
/m/09n4nb	/award/award_ceremony/awards_presented./award/award_honor/award_winner	/m/04qmr
/m/01hcj2	/base/popstra/celebrity/friendship./base/popstra/friendship/participant	/m/0p17j
/m/0kv238	/film/film/release_date_s./film/film_regional_release_date/film_release_region	/m/03rk0
/m/028tv0	/music/performance_role/regular_performances./music/group_membership/role	/m/05kms
/m/016s0m	/music/artist/track_contributions./music/track_contribution/role	/m/05842k
/m/01vw917	/award/award_nominee/award_nominations./award/award_nomination/award_nominee	/m/0jdhp
/m/0gfsq9	/film/film/production_companies	/m/046b0s
/m/0290rb	/base/aareas/schema/administrative_area/administrative_parent	/m/03rk0
/m/0fpkhkz	/film/film/country	/m/0f8l9c
/m/02w29z	/film/actor/film./film/performance/film	/m/02qkwl
/m/0gfsq9	/film/film/other_crew./film/film_crew_gig/crewmember	/m/03m49ly
/m/02f73b	/award/award_category/winners./award/award_honor/award_winner	/m/01v_pj6
/m/050l8	/location/location/adjoin_s./location/adjoining_relationship/adjoins	/m/015jr
/m/01c22t	/film/film/release_date_s./film/film_regional_release_date/film_release_region	/m/06t2t
/m/05zvq6g	/award/award_category/winners./award/award_honor/award_winner	/m/02l4pj
/m/016lh0	/government/politician/government_positions_held./government/government_position_held/legislative_sessions	/m/03rtmz
/m/0h7x	/location/location/adjoin_s./location/adjoining_relationship/adjoins	/m/06npd
/m/04xg2f	/film/film/genre	/m/0hn10
/m/03s9b	/award/award_nominee/award_nominations./award/award_nomination/award	/m/040njc
/m/04gp58p	/film/film/other_crew./film/film_crew_gig/film_crew_role	/m/0ch6mp2
/m/06rmdr	/film/film/language	/m/02h40lc
/m/0mkg	/music/performance_role/regular_performances./music/group_membership/role	/m/014zz1
/m/02_1sj	/film/film/other_crew./film/film_crew_gig/film_crew_role	/m/09vw2b7
/m/08hsww	/award/award_nominee/award_nominations./award/award_nomination/award_nominee	/m/083chw
/m/023slg	/music/artist/track_contributions./music/track_contribution/role	/m/01xqw
/m/0gtvpkw	/film/film/release_date_s./film/film_regional_release_date/film_release_region	/m/05b4w
/m/02wgk1	/film/film/executive_produced_by	/m/079vf
/m/063t3j	/award/award_nominee/award_nominations./award/award_nomination/award	/m/01bgqh
/m/01svw8n	/award/award_nominee/award_nominations./award/award_nomination/award_nominee	/m/01qq_lp
/m/060j8b	/base/popstra/celebrity/dated./base/popstra/dated/participant	/m/072bb1
/m/09pl3f	/people/person/profession	/m/0dxtg
/m/01y665	/award/award_nominee/award_nominations./award/award_nomination/award	/m/0789_m
/m/08s6mr	/film/film/other_crew./film/film_crew_gig/film_crew_role	/m/0ch6mp2
/m/02knnd	/people/person/spouse_s./people/marriage/type_of_union	/m/04ztj
/m/08cx5g	/tv/tv_program/regular_cast./tv/regular_tv_appearance/actor	/m/03q5dr
/m/0bqs56	/base/popstra/celebrity/friendship./base/popstra/friendship/participant	/m/01hcj2
/m/03gh4	/base/popstra/location/vacationers./base/popstra/vacation_choice/vacationer	/m/02v60l
/m/0dgrmp	/sports/sports_position/players./sports/sports_team_roster/team	/m/03m6zs
/m/02qjj7	/people/person/profession	/m/0dxtg
/m/060j8b	/base/popstra/celebrity/friendship./base/popstra/friendship/participant	/m/08hsww
/m/0259r0	/people/person/profession	/m/016z4k
/m/0488g9	/people/person/spouse_s./people/marriage/type_of_union	/m/04ztj
/m/015t56	/award/award_nominee/award_nominations./award/award_nomination/award_nominee	/m/023kzp
/m/03772	/award/award_nominee/award_nominations./award/award_nomination/award_nominee	/m/0bkf72
/m/08cx5g	/tv/tv_program/program_creator	/m/023jq1
/m/01gglm	/film/film/language	/m/02h40lc
/m/0cwrr	/tv/tv_program/genre	/m/0pr6f
/m/02s6sh	/music/artist/contribution./music/recording_contribution/performance_role	/m/0l14qv
/m/01p4vl	/award/award_nominee/award_nominations./award/award_nomination/nominated_for	/m/02bqvs
/m/01fxck	/people/person/profession	/m/0dxtg
/m/0h3k3f	/film/film/produced_by	/m/0171lb
/m/03f1r6t	/base/popstra/celebrity/friendship./base/popstra/friendship/participant	/m/0cqt90
/m/0gk4g	/people/cause_of_death/people	/m/05kh_
/m/0l14md	/music/performance_role/regular_performances./music/group_membership/role	/m/05ljv7
/m/0287xhr	/soccer/football_team/current_roster./soccer/football_roster_position/position	/m/0dgrmp
/m/0dgrmp	/sports/sports_position/players./sports/sports_team_roster/team	/m/01xn7x1
/m/09cvbq	/soccer/football_team/current_roster./soccer/football_roster_position/position	/m/0dgrmp
/m/07vfj	/education/educational_institution/colors	/m/088fh
/m/0db86	/people/profession/specialization_of	/m/09j9h
/m/08x5c_	/people/person/places_lived./people/place_lived/location	/m/07dfk
/m/0277990	/award/award_nominee/award_nominations./award/award_nomination/award_nominee	/m/0266r6h
/m/01963w	/award/award_nominee/award_nominations./award/award_nomination/award	/m/0262x6
/m/02blr4	/people/person/gender	/m/05zppz
/m/02l7c8	/media_common/netflix_genre/titles	/m/05pdh86
/m/09prnq	/music/group_member/membership./music/group_membership/group	/m/014_lq
/m/01qg7c	/film/director/film	/m/01kff7
/m/011yg9	/award/award_winning_work/awards_won./award/award_honor/award	/m/05h5nb8
/m/01tw31	/people/person/gender	/m/05zppz
/m/06c1y	/location/location/contains	/m/0cgs4
/m/05h43ls	/film/film/written_by	/m/070j61
/m/06rf7	/location/location/contains	/m/02p72j
/m/04mky3	/people/person/gender	/m/05zppz
/m/036hf4	/award/award_nominee/award_nominations./award/award_nomination/award_nominee	/m/01w9wwg
/m/01nfys	/film/actor/film./film/performance/film	/m/04gv3db
/m/017z88	/education/educational_institution/students_graduates./education/education/major_field_of_study	/m/01xqw
/m/0p5vf	/government/government_office_category/officeholders./government/government_position_held/jurisdiction_of_office	/m/035dk
/m/0dgrmp	/sports/sports_position/players./sports/sports_team_roster/team	/m/07b8m1
/m/0gk4g	/people/cause_of_death/people	/m/0hsmh
/m/017y6l	/education/educational_institution/colors	/m/067z2v
/m/01vvyc_	/base/popstra/celebrity/friendship./base/popstra/friendship/participant	/m/03h_0_z
/m/01xqw	/music/performance_role/regular_performances./music/group_membership/role	/m/0myk8
/m/019fz	/people/person/gender	/m/05zppz
/m/071xj	/award/award_nominee/award_nominations./award/award_nomination/award	/m/0b6k___
/m/0bkf72	/award/award_nominee/award_nominations./award/award_nomination/award_nominee	/m/03772
/m/09n4nb	/award/award_ceremony/awards_presented./award/award_honor/award_winner	/m/03h_0_z
/m/05ch98	/film/film/other_crew./film/film_crew_gig/film_crew_role	/m/09vw2b7
/m/0dc_ms	/film/film/other_crew./film/film_crew_gig/film_crew_role	/m/0ch6mp2
/m/0303jw	/soccer/football_team/current_roster./sports/sports_team_roster/position	/m/0dgrmp
/m/03v3xp	/award/award_winner/awards_won./award/award_honor/award_winner	/m/02l4pj
/m/02bqxb	/film/film/produced_by	/m/052hl
/m/06wjf	/travel/travel_destination/how_to_get_here./travel/transportation/mode_of_transportation	/m/07jdr
/m/01fm07	/music/genre/artists	/m/0x3n
/m/016tt2	/film/film_distributor/films_distributed./film/film_film_distributor_relationship/film	/m/0kbf1
/m/0bkmf	/people/deceased_person/place_of_burial	/m/018mmj
/m/0bq8tmw	/film/film/release_date_s./film/film_regional_release_date/film_release_region	/m/0154j
/m/0bmfnjs	/film/film/other_crew./film/film_crew_gig/film_crew_role	/m/09vw2b7
/m/0gs96	/award/award_category/winners./award/award_honor/ceremony	/m/0gmdkyy
/m/027zz	/people/person/place_of_birth	/m/02cl1
/m/015t56	/award/award_nominee/award_nominations./award/award_nomination/award_nominee	/m/014gf8
/m/0crvfq	/people/person/place_of_birth	/m/0s9z_
/m/04j1n8	/soccer/football_team/current_roster./soccer/football_roster_position/position	/m/0dgrmp
/m/01v1d8	/music/instrument/instrumentalists	/m/01yzl2
/m/01cmp9	/award/award_winning_work/awards_won./award/award_honor/award_winner	/m/02qgyv
/m/05rgl	/location/location/contains	/m/03gh4
/m/014v6f	/people/person/languages	/m/02h40lc
/m/01nn3m	/people/person/profession	/m/016z4k
/m/065jlv	/award/award_nominee/award_nominations./award/award_nomination/nominated_for	/m/011ywj
/m/07l450	/film/film/genre	/m/03bxz7
/m/012xdf	/people/person/spouse_s./people/marriage/type_of_union	/m/04ztj
/m/0fpzt5	/award/award_nominee/award_nominations./award/award_nomination/award	/m/0262zm
/m/0645k5	/film/film/film_format	/m/07fb8_
/m/015t56	/award/award_nominee/award_nominations./award/award_nomination/award_nominee	/m/04w391
/m/0fhnf	/location/administrative_division/country	/m/0h7x
/m/04cbbz	/film/film/language	/m/02h40lc
/m/0c53vt	/award/award_ceremony/awards_presented./award/award_honor/award_winner	/m/0bs8d
/m/042f1	/people/person/spouse_s./people/marriage/type_of_union	/m/04ztj
/m/01skmp	/base/popstra/celebrity/dated./base/popstra/dated/participant	/m/01vvb4m
/m/05hjnw	/award/award_winning_work/awards_won./award/award_honor/award	/m/040njc
/m/0gj9qxr	/film/film/release_date_s./film/film_regional_release_date/film_release_region	/m/0jgd
/m/03gvt	/music/performance_role/track_performances./music/track_contribution/role	/m/01rhl
/m/03qjwc	/music/record_label/artist	/m/01wdcxk
/m/01dhmw	/award/award_nominee/award_nominations./award/award_nomination/award	/m/0262x6
/m/05vzw3	/award/award_nominee/award_nominations./award/award_nomination/award_nominee	/m/01nhkxp
/m/0bj25	/film/film/production_companies	/m/016tt2
/m/018sg9	/education/educational_institution/students_graduates./education/education/student	/m/0j0pf
/m/023sng	/people/person/place_of_birth	/m/0hj6h
/m/02lxj_	/people/person/place_of_birth	/m/06_kh
/m/06npd	/olympics/olympic_participating_country/athletes./olympics/olympic_athlete_affiliation/olympics	/m/06sks6
/m/01pr6q7	/people/person/spouse_s./people/marriage/type_of_union	/m/04ztj
/m/0h7pj	/base/popstra/celebrity/breakup./base/popstra/breakup/participant	/m/019pm_
/m/01pcvn	/base/popstra/celebrity/dated./base/popstra/dated/participant	/m/06crng
/m/0kx4m	/award/award_winner/awards_won./award/award_honor/award_winner	/m/0343h
/m/0d7wh	/people/ethnicity/people	/m/0kh6b
/m/07s9rl0	/media_common/netflix_genre/titles	/m/047myg9
/m/01rhl	/music/performance_role/track_performances./music/track_contribution/role	/m/0l15bq
/m/0bn8fw	/people/person/gender	/m/05zppz
/m/05qbckf	/film/film/other_crew./film/film_crew_gig/crewmember	/m/04ktcgn
/m/01kymm	/music/artist/origin	/m/07dfk
/m/045hz5	/people/person/languages	/m/02h40lc
/m/01f3p_	/tv/tv_program/regular_cast./tv/regular_tv_appearance/actor	/m/01pw2f1
/m/05f7w84	/tv/tv_program/regular_cast./tv/regular_tv_appearance/actor	/m/04mlh8
/m/0g96wd	/people/ethnicity/people	/m/0mbhr
/m/0d7vtk	/tv/tv_program/genre	/m/07s9rl0
/m/027m5wv	/film/film/other_crew./film/film_crew_gig/film_crew_role	/m/0ch6mp2
/m/0d05w3	/location/location/contains	/m/05gqy
/m/01vv6_6	/people/person/gender	/m/05zppz
/m/07s9rl0	/media_common/netflix_genre/titles	/m/01hqhm
/m/01svq8	/people/person/spouse_s./people/marriage/type_of_union	/m/04ztj
/m/0jrtv	/location/location/contains	/m/0ply0
/m/099ks0	/film/film_distributor/films_distributed./film/film_film_distributor_relationship/film	/m/01p3ty
/m/03f1r6t	/people/person/gender	/m/05zppz
/m/04cl1	/people/person/spouse_s./people/marriage/type_of_union	/m/04ztj
/m/07brj	/music/instrument/family	/m/0l14md
/m/030155	/people/person/profession	/m/016z4k
/m/01ln5z	/film/film/language	/m/02h40lc
/m/0154qm	/award/award_nominee/award_nominations./award/award_nomination/award_nominee	/m/09wj5
/m/0m313	/film/film/language	/m/02h40lc
/m/033qdy	/film/film/other_crew./film/film_crew_gig/film_crew_role	/m/0ch6mp2
/m/026p4q7	/award/award_winning_work/awards_won./award/award_honor/award_winner	/m/051z6rz
/m/01ffx4	/award/award_winning_work/awards_won./award/award_honor/award_winner	/m/05d1dy
/m/01wqlc	/music/genre/artists	/m/012201
/m/02xbyr	/film/film/release_date_s./film/film_regional_release_date/film_release_region	/m/06t2t
/m/0bp_b2	/award/award_category/nominees./award/award_nomination/nominated_for	/m/02k_4g
/m/0jk_8	/base/aareas/schema/administrative_area/administrative_parent	/m/0d05w3
/m/0gqz2	/award/award_category/winners./award/award_honor/award_winner	/m/01gg59
/m/02l7c8	/media_common/netflix_genre/titles	/m/0m313
/m/0d3qd0	/people/person/religion	/m/0c8wxp
/m/0crx5w	/award/award_winner/awards_won./award/award_honor/award_winner	/m/02wk_43
/m/0j46b	/soccer/football_team/current_roster./soccer/football_roster_position/position	/m/0dgrmp
/m/0g293	/music/genre/artists	/m/02qlg7s
/m/0pj8m	/people/person/place_of_birth	/m/01j922
/m/0wq36	/location/location/time_zones	/m/02fqwt
/m/01vng3b	/music/group_member/membership./music/group_membership/role	/m/0l14md
/m/0mkg	/music/performance_role/regular_performances./music/group_membership/role	/m/028tv0
/m/030hcs	/celebrities/celebrity/sexual_relationships./celebrities/romantic_relationship/celebrity	/m/030hbp
/m/07jqjx	/film/film/release_date_s./film/film_regional_release_date/film_release_region	/m/0154j
/m/0f8l9c	/olympics/olympic_participating_country/medals_won./olympics/olympic_medal_honor/olympics	/m/0jhn7
/m/01ffx4	/film/film/genre	/m/07s9rl0
/m/030znt	/award/award_winner/awards_won./award/award_honor/award_winner	/m/05lb30
/m/07zhjj	/tv/tv_program/program_creator	/m/03cs_xw
/m/0ylvj	/education/educational_institution/students_graduates./education/education/student	/m/041h0
/m/07l450	/film/film/other_crew./film/film_crew_gig/film_crew_role	/m/0ch6mp2
/m/016kkx	/people/person/gender	/m/05zppz
/m/02qjj7	/base/popstra/celebrity/canoodled./base/popstra/canoodled/participant	/m/05r5w
/m/0d9z_y	/location/location/time_zones	/m/02fqwt
/m/01hw5kk	/film/film/language	/m/02h40lc
/m/02ts3h	/people/person/languages	/m/02h40lc
/m/04smkr	/award/award_winner/awards_won./award/award_honor/award_winner	/m/0crvfq
/m/03hfxx	/people/person/gender	/m/05zppz
/m/0ply0	/travel/travel_destination/how_to_get_here./travel/transportation/mode_of_transportation	/m/07jdr
/m/02k4b2	/film/actor/film./film/performance/film	/m/02xtxw
/m/011yph	/award/award_winning_work/awards_won./award/award_honor/award	/m/040njc
/m/050l8	/location/statistical_region/religions./location/religion_percentage/religion	/m/0c8wxp
/m/0gkd1	/music/performance_role/track_performances./music/track_contribution/role	/m/085jw
/m/01qh7	/base/biblioness/bibs_location/state	/m/05k7sb
/m/05kms	/music/instrument/instrumentalists	/m/0135xb
/m/02pzz3p	/award/award_category/nominees./award/award_nomination/nominated_for	/m/02_1kl
/m/018ljb	/olympics/olympic_games/sports	/m/0d1tm
/m/0661ql3	/film/film/other_crew./film/film_crew_gig/film_crew_role	/m/089fss
/m/07brj	/music/performance_role/track_performances./music/track_contribution/role	/m/05842k
/m/0l14md	/music/performance_role/regular_performances./music/group_membership/group	/m/03vhvp
/m/09f6b	/olympics/olympic_sport/athletes./olympics/olympic_athlete_affiliation/country	/m/0f8l9c
/m/03h_9lg	/award/award_nominee/award_nominations./award/award_nomination/award	/m/09sb52
/m/023kzp	/award/award_nominee/award_nominations./award/award_nomination/award_nominee	/m/02qgqt
/m/08rr3p	/film/film/genre	/m/0jdm8
/m/01hxs4	/celebrities/celebrity/celebrity_friends./celebrities/friendship/friend	/m/0335fp
/m/0755wz	/award/award_nominee/award_nominations./award/award_nomination/nominated_for	/m/011ywj
/m/02p65p	/award/award_winner/awards_won./award/award_honor/award_winner	/m/0crvfq
/m/02v60l	/base/popstra/celebrity/dated./base/popstra/dated/participant	/m/01pw2f1
/m/0c3ns	/award/award_nominee/award_nominations./award/award_nomination/award	/m/0j298t8
/m/0946bb	/award/award_winning_work/awards_won./award/award_honor/honored_for	/m/0140g4
/m/0l14md	/music/performance_role/regular_performances./music/group_membership/group	/m/01w5n51
/m/05kms	/music/performance_role/regular_performances./music/group_membership/role	/m/0myk8
/m/014mlp	/education/educational_degree/people_with_this_degree./education/education/institution	/m/0hd7j
/m/03wh49y	/film/film/language	/m/02h40lc
/m/0dx97	/people/person/profession	/m/06q2q
/m/0mdqp	/film/actor/film./film/performance/film	/m/04gv3db
/m/0gj9qxr	/film/film/release_date_s./film/film_regional_release_date/film_release_region	/m/0d0vqn
/m/01w5n51	/influence/influence_node/influenced_by	/m/07hgm
/m/0yzvw	/film/film/other_crew./film/film_crew_gig/film_crew_role	/m/01pvkk
/m/0jwl2	/tv/tv_program/regular_cast./tv/regular_tv_appearance/actor	/m/01r4bps
/m/06z6r	/olympics/olympic_sport/athletes./olympics/olympic_athlete_affiliation/country	/m/01rxw
/m/07h07	/award/award_nominee/award_nominations./award/award_nomination/award	/m/01l78d
/m/0lgsq	/award/award_nominee/award_nominations./award/award_nomination/award	/m/01ckbq
/m/05fnl9	/award/award_nominee/award_nominations./award/award_nomination/award	/m/09sb52
/m/0347xz	/people/person/gender	/m/05zppz
/m/02cl1	/sports/sports_team_location/teams	/m/0289q
/m/0db94w	/film/film/release_date_s./film/film_regional_release_date/film_release_region	/m/06qd3
/m/05th8t	/award/award_nominee/award_nominations./award/award_nomination/award_nominee	/m/03mcwq3
/m/054krc	/award/award_category/nominees./award/award_nomination/nominated_for	/m/011xg5
/m/0241y7	/film/film/genre	/m/02l7c8
/m/0136g9	/people/person/profession	/m/0dxtg
/m/025ts_z	/film/film/genre	/m/07s9rl0
/m/0crx5w	/award/award_nominee/award_nominations./award/award_nomination/award_nominee	/m/03wh8kl
/m/019bk0	/award/award_ceremony/awards_presented./award/award_honor/award_winner	/m/01w7nwm
/m/02q5xsx	/award/award_winner/awards_won./award/award_honor/award_winner	/m/027hnjh
/m/0209hj	/award/award_winning_work/awards_won./award/award_honor/award	/m/04kxsb
/m/0yzvw	/award/award_winning_work/awards_won./award/award_honor/award_winner	/m/03hy3g
/m/060j8b	/base/popstra/celebrity/friendship./base/popstra/friendship/participant	/m/0fpj9pm
/m/06cm5	/film/film/genre	/m/03bxz7
/m/01w9wwg	/film/actor/film./film/performance/film	/m/0b3n61
/m/01zlwg6	/base/biblioness/bibs_location/state	/m/01n7q
/m/06ylv0	/soccer/football_team/current_roster./soccer/football_roster_position/position	/m/0dgrmp
/m/012bk	/people/person/gender	/m/05zppz
/m/07qg8v	/film/film/other_crew./film/film_crew_gig/film_crew_role	/m/01pvkk
/m/0g2ff	/music/instrument/family	/m/0mkg
/m/0p_pd	/people/person/places_lived./people/place_lived/location	/m/01n7q
/m/03q5dr	/award/award_nominee/award_nominations./award/award_nomination/award_nominee	/m/02lxj_
/m/016vg8	/award/award_nominee/award_nominations./award/award_nomination/award_nominee	/m/015t56
/m/01qq_lp	/award/award_winner/awards_won./award/award_honor/award_winner	/m/01svw8n
/m/028tv0	/music/performance_role/regular_performances./music/group_membership/role	/m/0l14qv
/m/01p4vl	/people/person/spouse_s./people/marriage/spouse	/m/019pm_
/m/059j4x	/award/award_nominee/award_nominations./award/award_nomination/award_nominee	/m/0382m4
/m/04kxsb	/award/award_category/nominees./award/award_nomination/nominated_for	/m/0sxns
/m/0l99s	/influence/influence_node/influenced_by	/m/0379s
/m/02q_x_l	/tv/tv_program/languages	/m/02h40lc
/m/02wgln	/people/person/profession	/m/0np9r
/m/0f_y9	/people/person/spouse_s./people/marriage/type_of_union	/m/04ztj
/m/084nh	/people/person/profession	/m/05z96
/m/049468	/people/person/spouse_s./people/marriage/type_of_union	/m/04ztj
/m/0gkxgfq	/award/award_ceremony/awards_presented./award/award_honor/award_winner	/m/03f1r6t
/m/0309lm	/people/person/profession	/m/0np9r
/m/04q7r	/music/performance_role/track_performances./music/track_contribution/role	/m/07brj
/m/04w391	/award/award_nominee/award_nominations./award/award_nomination/award_nominee	/m/01p4vl
/m/0gbwp	/award/award_nominee/award_nominations./award/award_nomination/award	/m/02v1m7
/m/01vvb4m	/people/person/gender	/m/05zppz
/m/01h910	/people/person/gender	/m/05zppz
/m/040b5k	/film/film/release_date_s./film/film_regional_release_date/film_release_region	/m/07ylj
/m/05mkhs	/people/person/gender	/m/05zppz
/m/012v9y	/people/deceased_person/place_of_death	/m/06_kh
/m/02lt8	/people/person/gender	/m/05zppz
/m/08_vwq	/award/award_category/winners./award/award_honor/award_winner	/m/039xcr
/m/07hwkr	/people/ethnicity/people	/m/01hcj2
/m/02f6g5	/film/film/featured_film_locations	/m/03gh4
/m/07nv3_	/people/person/spouse_s./people/marriage/type_of_union	/m/04ztj
/m/0gz6b6g	/film/film/release_date_s./film/film_regional_release_date/film_release_region	/m/03rk0
/m/02ywhz	/award/award_ceremony/awards_presented./award/award_honor/award_winner	/m/02cx72
/m/01rzqj	/people/person/spouse_s./people/marriage/type_of_union	/m/04ztj
/m/02kx4w	/music/genre/parent_genre	/m/03p7rp
/m/0l15bq	/music/performance_role/guest_performances./music/recording_contribution/performance_role	/m/01qbl
/m/01z7_f	/film/actor/film./film/performance/film	/m/0277j40
/m/0g9wdmc	/film/film/release_date_s./film/film_regional_release_date/film_release_region	/m/04gzd
/m/0gk4g	/people/cause_of_death/people	/m/01g42
/m/032_wv	/film/film/other_crew./film/film_crew_gig/film_crew_role	/m/089fss
/m/05g3ss	/people/person/languages	/m/02h40lc
/m/0b_dy	/people/person/languages	/m/02h40lc
/m/02q_4ph	/award/award_nominated_work/award_nominations./award/award_nomination/nominated_for	/m/0cq7tx
/m/01w5gg6	/people/person/gender	/m/05zppz
/m/05bnq3j	/award/award_nominee/award_nominations./award/award_nomination/award_nominee	/m/06msq2
/m/05qtj	/base/popstra/location/vacationers./base/popstra/vacation_choice/vacationer	/m/025b5y
/m/0mkg	/music/performance_role/regular_performances./music/group_membership/role	/m/07brj
/m/027pfb2	/tv/tv_program/genre	/m/07s9rl0
/m/07s9rl0	/media_common/netflix_genre/titles	/m/0qm9n
/m/0bx8pn	/education/educational_institution/students_graduates./education/education/student	/m/042f1
/m/0df4y	/base/biblioness/bibs_location/country	/m/0d05w3
/m/06x77g	/award/award_winning_work/awards_won./award/award_honor/award	/m/02w_6xj
/m/01vvyc_	/people/person/gender	/m/05zppz
/m/0l14md	/music/performance_role/regular_performances./music/group_membership/group	/m/089tm
/m/01gp_x	/award/award_winner/awards_won./award/award_honor/award_winner	/m/02q5xsx
/m/0c3351	/media_common/netflix_genre/titles	/m/032sl_
/m/0gqz2	/award/award_category/winners./award/award_honor/award_winner	/m/01vttb9
/m/0gnkb	/film/film/language	/m/02h40lc
/m/087vz	/military/military_combatant/military_conflicts./military/military_combatant_group/combatants	/m/0f8l9c
/m/0154qm	/award/award_nominee/award_nominations./award/award_nomination/award_nominee	/m/0f0kz
/m/0d0vqn	/location/location/adjoin_s./location/adjoining_relationship/adjoins	/m/05b4w
/m/02zj61	/award/award_nominee/award_nominations./award/award_nomination/award	/m/0gqz2
/m/0f8l9c	/organization/organization_member/member_of./organization/organization_membership/organization	/m/02jxk
/m/0b4rf3	/people/person/gender	/m/05zppz
/m/01hvv0	/tv/tv_program/languages	/m/02h40lc
/m/026mfs	/award/award_category/winners./award/award_honor/award_winner	/m/025l5
/m/07s9rl0	/media_common/netflix_genre/titles	/m/084302
/m/0cz_ym	/film/film/other_crew./film/film_crew_gig/film_crew_role	/m/089fss
/m/01q940	/music/record_label/artist	/m/01l1sq
/m/03rk0	/location/location/contains	/m/01c0h6
/m/045hz5	/people/person/religion	/m/0flw86
/m/0f8l9c	/organization/organization_member/member_of./organization/organization_membership/organization	/m/01rz1
/m/0187nd	/education/educational_institution/students_graduates./education/education/student	/m/0l786
/m/0401sg	/film/film/distributors./film/film_film_distributor_relationship/film_distribution_medium	/m/0dq6p
/m/0l14md	/music/performance_role/track_performances./music/track_contribution/role	/m/0mkg
/m/06182p	/education/educational_institution/students_graduates./education/education/student	/m/012dr7
/m/0x67	/people/ethnicity/people	/m/0203v
/m/06msq2	/award/award_nominee/award_nominations./award/award_nomination/award_nominee	/m/01xdf5
/m/09wj5	/people/person/gender	/m/05zppz
/m/01tcf7	/film/actor/film./film/performance/film	/m/01hqhm
/m/02p65p	/award/award_winner/awards_won./award/award_honor/award_winner	/m/0blbxk
/m/063zky	/tv/tv_program/regular_cast./tv/regular_tv_appearance/actor	/m/029cpw
/m/01gp_x	/award/award_nominee/award_nominations./award/award_nomination/award_nominee	/m/027hnjh
/m/0h7x	/location/location/partially_contains	/m/026zt
/m/01k23t	/people/person/profession	/m/016z4k
/m/0h0wd9	/film/film/production_companies	/m/016tt2
/m/01hw5kk	/film/film/genre	/m/06qln
/m/0g2lq	/tv/tv_producer/programs_produced./tv/tv_producer_term/program	/m/0l76z
/m/04rqd	/tv/tv_network/programs./tv/tv_network_duration/program	/m/0q9nj
/m/0154qm	/award/award_winner/awards_won./award/award_honor/award_winner	/m/01ps2h8
/m/014mlp	/education/educational_degree/people_with_this_degree./education/education/institution	/m/01q460
/m/0807ml	/award/award_nominee/award_nominations./award/award_nomination/award_nominee	/m/05fnl9
/m/02qgyv	/film/actor/film./film/performance/film	/m/06q8qh
/m/0bqdvt	/award/award_nominee/award_nominations./award/award_nomination/award_nominee	/m/023kzp
/m/01xn5th	/soccer/football_team/current_roster./soccer/football_roster_position/position	/m/0dgrmp
/m/06szd3	/award/hall_of_fame/inductees./award/hall_of_fame_induction/inductee	/m/02dh86
/m/09sdmz	/award/award_category/winners./award/award_honor/award_winner	/m/0b_dy
/m/060__7	/film/film/other_crew./film/film_crew_gig/film_crew_role	/m/0ch6mp2
/m/04sh80	/film/film/genre	/m/0c3351
/m/014ps4	/award/award_nominee/award_nominations./award/award_nomination/award	/m/039yzf
/m/05lb87	/award/award_nominee/award_nominations./award/award_nomination/award_nominee	/m/05lb30
/m/02rdxsh	/award/award_category/nominees./award/award_nomination/nominated_for	/m/06823p
/m/01njml	/soccer/football_team/current_roster./sports/sports_team_roster/position	/m/0dgrmp
/m/0frq6	/food/food/nutrients./food/nutrition_fact/nutrient	/m/09pbb
/m/0gk4g	/people/cause_of_death/people	/m/030dx5
/m/04j689	/soccer/football_team/current_roster./soccer/football_roster_position/position	/m/0dgrmp
/m/0kh6b	/people/person/spouse_s./people/marriage/type_of_union	/m/04ztj
/m/01g969	/people/person/spouse_s./people/marriage/spouse	/m/0cwtm
/m/06t2t	/base/popstra/location/vacationers./base/popstra/vacation_choice/vacationer	/m/02lnhv
/m/05_5rjx	/film/film/genre	/m/07s9rl0
/m/06h7l7	/award/award_nominee/award_nominations./award/award_nomination/nominated_for	/m/0cwrr
/m/06c1y	/location/country/form_of_government	/m/06cx9
/m/0cwrr	/tv/tv_program/genre	/m/04t36
/m/013rds	/people/person/profession	/m/039v1
/m/02w_6xj	/award/award_category/winners./award/award_honor/award_winner	/m/0184jw
/m/02wgln	/people/person/place_of_birth	/m/0nbrp
/m/0l2lk	/location/location/contains	/m/0r1yc
/m/017z88	/education/educational_institution/students_graduates./education/education/student	/m/01ycfv
/m/031zp2	/soccer/football_team/current_roster./sports/sports_team_roster/position	/m/0dgrmp
/m/048scx	/film/film/genre	/m/07s9rl0
/m/07bzz7	/film/film/release_date_s./film/film_regional_release_date/film_release_region	/m/0d0vqn
/m/016tt2	/organization/organization/headquarters./location/mailing_address/citytown	/m/0k049
/m/09r1j5	/people/person/religion	/m/0flw86
/m/0dwl2	/business/business_operation/industry	/m/020mfr
/m/04b_jc	/film/film/genre	/m/07s9rl0
/m/01gsry	/government/legislative_session/members./government/government_position_held/legislative_sessions	/m/01gst9
/m/0hvvf	/film/film/written_by	/m/0hw1j
/m/0c53vt	/award/award_ceremony/awards_presented./award/award_honor/award_winner	/m/04rcl7
/m/0c40vxk	/film/film/release_date_s./film/film_regional_release_date/film_release_region	/m/07ylj
/m/0401sg	/film/film/release_date_s./film/film_regional_release_date/film_release_region	/m/05b4w
/m/04kxsb	/award/award_category/nominees./award/award_nomination/nominated_for	/m/05hjnw
/m/09qwmm	/award/award_category/winners./award/award_honor/ceremony	/m/027hjff
/m/054ky1	/award/award_category/winners./award/award_honor/award_winner	/m/039bp
/m/07s9rl0	/media_common/netflix_genre/titles	/m/0cf08
/m/084nh	/people/person/gender	/m/05zppz
/m/040b5k	/film/film/country	/m/0d05w3
/m/07l8f	/sports/sports_team/sport	/m/018jz
/m/016kkx	/award/award_nominee/award_nominations./award/award_nomination/award	/m/0bfvd4
/m/014mlp	/education/educational_degree/people_with_this_degree./education/education/institution	/m/0bx8pn
/m/05p09zm	/award/award_category/winners./award/award_honor/award_winner	/m/0147dk
/m/01n7q	/location/location/contains	/m/0l2v0
/m/01xvb	/sports/professional_sports_team/draft_picks./sports/sports_league_draft_pick/draft	/m/03nt7j
/m/03cv_gy	/tv/tv_program/regular_cast./tv/regular_tv_appearance/actor	/m/0g8st4
/m/03d63lb	/film/actor/film./film/performance/film	/m/09fn1w
/m/0c_j9x	/film/film/genre	/m/07s9rl0
/m/0f8l9c	/media_common/netflix_genre/titles	/m/02q6gfp
/m/0hv8w	/film/film/edited_by	/m/0343h
/m/02_xgp2	/education/educational_degree/people_with_this_degree./education/education/major_field_of_study	/m/06mnr
/m/0181hw	/music/record_label/artist	/m/013rds
/m/019w9j	/olympics/olympic_sport/athletes./olympics/olympic_athlete_affiliation/country	/m/06c1y
/m/09wj5	/film/actor/film./film/performance/film	/m/01vw8k
/m/0j3v	/influence/influence_node/influenced_by	/m/026lj
/m/0tc7	/people/person/profession	/m/025sppp
/m/07cn2c	/film/actor/dubbing_performances./film/dubbing_performance/language	/m/02h40lc
/m/0l14qv	/music/performance_role/regular_performances./music/group_membership/role	/m/050rj
/m/02bh8z	/music/record_label/artist	/m/07hgm
/m/01rwcgb	/people/person/gender	/m/05zppz
/m/0cj2w	/people/person/profession	/m/0dxtg
/m/039bp	/award/award_nominee/award_nominations./award/award_nomination/nominated_for	/m/0277j40
/m/04s430	/base/americancomedy/celebrity_impressionist/celebrities_impersonated	/m/01pfkw
/m/02p65p	/award/award_nominee/award_nominations./award/award_nomination/award_nominee	/m/06g2d1
/m/02l5rm	/award/award_nominee/award_nominations./award/award_nomination/award	/m/040njc
/m/0gtv7pk	/film/film/release_date_s./film/film_regional_release_date/film_release_region	/m/0d0vqn
/m/026m9w	/award/award_category/winners./award/award_honor/award_winner	/m/03yf3z
/m/0cqhk0	/award/award_category/winners./award/award_honor/award_winner	/m/0m66w
/m/0dgrmp	/sports/sports_position/players./sports/sports_team_roster/team	/m/09pgj2
/m/01ffx4	/film/film/release_date_s./film/film_regional_release_date/film_release_region	/m/0f8l9c
/m/014z8v	/people/person/spouse_s./people/marriage/type_of_union	/m/04ztj
/m/06g2d1	/people/person/gender	/m/05zppz
/m/014mlp	/education/educational_degree/people_with_this_degree./education/education/institution	/m/0159r9
/m/040njc	/award/award_category/nominees./award/award_nomination/nominated_for	/m/0qmfz
/m/0gz6b6g	/film/film/language	/m/02h40lc
/m/0ylvj	/education/educational_institution/students_graduates./education/education/major_field_of_study	/m/01lj9
/m/034qrh	/film/film/produced_by	/m/0mdqp
/m/0x67	/people/ethnicity/people	/m/03q2t9
/m/02q8ms8	/film/film/language	/m/064_8sq
/m/01vsksr	/people/person/profession	/m/01c72t
/m/0m_1s	/base/biblioness/bibs_location/country	/m/0f8l9c
/m/01x0sy	/people/person/gender	/m/05zppz
/m/0b05xm	/award/award_nominee/award_nominations./award/award_nomination/award_nominee	/m/02q5xsx
/m/06pyc2	/film/film/language	/m/02h40lc
/m/0gkgp	/base/biblioness/bibs_location/state	/m/06yxd
/m/011ywj	/award/award_winning_work/awards_won./award/award_honor/award	/m/09sb52
/m/014mlp	/education/educational_degree/people_with_this_degree./education/education/student	/m/012xdf
/m/02q6gfp	/film/film/country	/m/0f8l9c
/m/07s9rl0	/media_common/netflix_genre/titles	/m/03cv_gy
/m/027gy0k	/film/film/production_companies	/m/046b0s
/m/09sdmz	/award/award_category/nominees./award/award_nomination/nominated_for	/m/0m313
/m/07wbk	/government/political_party/politicians_in_this_party./government/political_party_tenure/politician	/m/0d06m5
/m/037ls6	/food/food/nutrients./food/nutrition_fact/nutrient	/m/02kc008
/m/03zqc1	/people/person/spouse_s./people/marriage/spouse	/m/023kzp
/m/0x67	/people/ethnicity/people	/m/0x3n
/m/0k1bs	/people/person/profession	/m/039v1
/m/02g5h5	/film/actor/film./film/performance/film	/m/025ts_z
/m/063zky	/film/film/genre	/m/02l7c8
/m/04vr_f	/award/award_winning_work/awards_won./award/award_honor/award_winner	/m/042xrr
/m/01h18v	/film/film/language	/m/02h40lc
/m/021996	/organization/organization/headquarters./location/mailing_address/state_province_region	/m/01n7q
/m/0154j	/organization/organization_member/member_of./organization/organization_membership/organization	/m/02jxk
/m/04wx2v	/award/award_nominee/award_nominations./award/award_nomination/award	/m/02x4x18
/m/0f9rw9	/base/marchmadness/ncaa_basketball_tournament/seeds./base/marchmadness/ncaa_tournament_seed/team	/m/02pjzvh
/m/0dgrmp	/sports/sports_position/players./sports/sports_team_roster/team	/m/0425gc
/m/01q460	/education/educational_institution/students_graduates./education/education/major_field_of_study	/m/02h40lc
/m/03s9b	/people/person/languages	/m/02h40lc
/m/0bfvd4	/award/award_category/nominees./award/award_nomination/nominated_for	/m/0h3mh3q
/m/02p8v8	/people/person/spouse_s./people/marriage/type_of_union	/m/04ztj
/m/03gvt	/music/performance_role/track_performances./music/track_contribution/role	/m/01qbl
/m/059f4	/location/statistical_region/religions./location/religion_percentage/religion	/m/0631_
/m/02tgz4	/film/film/language	/m/02h40lc
/m/05842k	/music/performance_role/track_performances./music/track_contribution/role	/m/03gvt
/m/0kb07	/film/film/release_date_s./film/film_regional_release_date/film_release_region	/m/0f8l9c
/m/012dr7	/people/person/gender	/m/05zppz
/m/03wh8kl	/people/person/gender	/m/05zppz
/m/012vct	/award/award_nominee/award_nominations./award/award_nomination/award	/m/040njc
/m/019pm_	/award/award_nominee/award_nominations./award/award_nomination/award_nominee	/m/05cx7x
/m/08rr3p	/film/film/genre	/m/07s9rl0
/m/01cspq	/people/person/spouse_s./people/marriage/type_of_union	/m/04ztj
/m/0jhn7	/user/jg/default_domain/olympic_games/sports	/m/018w8
/m/01p3ty	/film/film/genre	/m/04t36
/m/01738w	/film/film/music	/m/023361
/m/0315q3	/award/award_nominee/award_nominations./award/award_nomination/award_nominee	/m/03k7bd
/m/03qnc6q	/film/film/release_date_s./film/film_regional_release_date/film_release_region	/m/0d0vqn
/m/0275n3y	/award/award_ceremony/awards_presented./award/award_honor/award_winner	/m/025b5y
/m/0gs96	/award/award_category/winners./award/award_honor/ceremony	/m/0c53zb
/m/01gp_x	/people/person/gender	/m/05zppz
/m/015vq_	/award/award_nominee/award_nominations./award/award_nomination/nominated_for	/m/016ks5
/m/06crng	/people/person/spouse_s./people/marriage/location_of_ceremony	/m/03rk0
/m/02qvhbb	/people/person/profession	/m/0dxtg
/m/010xjr	/people/person/gender	/m/05zppz
/m/09ykwk	/film/actor/dubbing_performances./film/dubbing_performance/language	/m/02h40lc
/m/014z8v	/people/person/profession	/m/0np9r
/m/02nhxf	/award/award_category/winners./award/award_honor/award_winner	/m/01vvydl
/m/05g49	/sports/professional_sports_team/draft_picks./sports/sports_league_draft_pick/draft	/m/03nt7j
/m/011yxy	/award/award_winning_work/awards_won./award/award_honor/award_winner	/m/05dppk
/m/0f0kz	/people/person/spouse_s./people/marriage/type_of_union	/m/04ztj
/m/0cbl95	/award/award_winning_work/awards_won./award/award_honor/award_winner	/m/0gv2r
/m/0__wm	/location/location/time_zones	/m/02fqwt
/m/02n4kr	/media_common/netflix_genre/titles	/m/05qm9f
/m/016cyt	/music/genre/artists	/m/02ht0ln
/m/019f2f	/award/award_nominee/award_nominations./award/award_nomination/award	/m/09qwmm
/m/05mkhs	/award/award_nominee/award_nominations./award/award_nomination/award_nominee	/m/01y665
/m/03nkts	/award/award_nominee/award_nominations./award/award_nomination/award_nominee	/m/03xkps
/m/01nz1q6	/people/person/spouse_s./people/marriage/type_of_union	/m/04ztj
/m/014mlp	/education/educational_degree/people_with_this_degree./education/education/student	/m/0l6qt
/m/05kh_	/film/actor/film./film/performance/film	/m/0k54q
/m/08_vwq	/award/award_category/winners./award/award_honor/award_winner	/m/01trf3
/m/0g9wdmc	/film/film/release_date_s./film/film_regional_release_date/film_release_region	/m/0d0vqn
/m/0gt3p	/people/person/spouse_s./people/marriage/type_of_union	/m/04ztj
/m/03jldb	/people/person/profession	/m/0dxtg
/m/09v0wy2	/award/award_category/nominees./award/award_nomination/nominated_for	/m/043n0v_
/m/0ywqc	/film/actor/film./film/performance/film	/m/0j_tw
/m/014mlp	/education/educational_degree/people_with_this_degree./education/education/institution	/m/017y6l
/m/05th8t	/film/actor/film./film/performance/film	/m/0cfhfz
/m/0hn10	/media_common/netflix_genre/titles	/m/05_5rjx
/m/01p4vl	/award/award_nominee/award_nominations./award/award_nomination/award	/m/09sb52
/m/01mqnr	/people/person/gender	/m/05zppz
/m/01w9wwg	/award/award_nominee/award_nominations./award/award_nomination/award_nominee	/m/01svw8n
/m/0c3351	/media_common/netflix_genre/titles	/m/01jmyj
/m/02ylg6	/film/film/other_crew./film/film_crew_gig/crewmember	/m/05bm4sm
/m/01679d	/music/performance_role/track_performances./music/track_contribution/role	/m/0l14qv
/m/02b07b	/organization/organization/headquarters./location/mailing_address/citytown	/m/024bqj
/m/0hsmh	/people/person/spouse_s./people/marriage/type_of_union	/m/04ztj
/m/0b2km_	/film/film/genre	/m/07s9rl0
/m/06cv1	/people/person/profession	/m/01c72t
/m/02q_4ph	/film/film/genre	/m/02l7c8
/m/043g7l	/music/record_label/artist	/m/01pfkw
/m/014v6f	/award/award_nominee/award_nominations./award/award_nomination/award	/m/09sdmz
/m/09vzz	/education/educational_institution/students_graduates./education/education/student	/m/0tfc
/m/01t9qj_	/people/deceased_person/place_of_death	/m/0r3w7
/m/04h54p	/soccer/football_team/current_roster./sports/sports_team_roster/position	/m/0dgrmp
/m/05qtj	/travel/travel_destination/climate./travel/travel_destination_monthly_climate/month	/m/04wzr
/m/0cqhk0	/award/award_category/winners./award/award_honor/award_winner	/m/096lf_
/m/024y6w	/people/person/spouse_s./people/marriage/type_of_union	/m/04ztj
/m/01rzqj	/award/award_nominee/award_nominations./award/award_nomination/nominated_for	/m/025ts_z
/m/02p65p	/award/award_nominee/award_nominations./award/award_nomination/award_nominee	/m/023kzp
/m/0fpkhkz	/film/film/release_date_s./film/film_regional_release_date/film_release_region	/m/06qd3
/m/011yg9	/film/film/language	/m/02h40lc
/m/0pv2t	/film/film/genre	/m/07s9rl0
/m/0l76z	/tv/tv_program/regular_cast./tv/regular_tv_appearance/actor	/m/01pcdn
/m/02s5v5	/award/award_winner/awards_won./award/award_honor/award_winner	/m/07cn2c
/m/0bw87	/people/person/spouse_s./people/marriage/type_of_union	/m/04ztj
/m/02rxbmt	/award/award_nominee/award_nominations./award/award_nomination/award	/m/02v703
/m/02lz1s	/people/person/gender	/m/05zppz
/m/04ztj	/people/marriage_union_type/unions_of_this_type./people/marriage/location_of_ceremony	/m/0f2r6
/m/04wx2v	/award/award_nominee/award_nominations./award/award_nomination/award	/m/09sb52
/m/01y665	/award/award_nominee/award_nominations./award/award_nomination/award_nominee	/m/03q5dr
/m/05qtj	/base/popstra/location/vacationers./base/popstra/vacation_choice/vacationer	/m/01rzqj
/m/0661ql3	/film/film/release_date_s./film/film_regional_release_date/film_release_region	/m/06t2t
/m/01ps2h8	/award/award_nominee/award_nominations./award/award_nomination/award	/m/09sb52
/m/01vsy3q	/people/person/profession	/m/01c72t
/m/052hl	/people/person/profession	/m/0dxtg
/m/0lccn	/people/person/profession	/m/05z96
/m/0cc5tgk	/people/person/nationality	/m/0jgd
/m/0cwx_	/education/educational_institution/colors	/m/036k5h
/m/04lqvly	/film/film/other_crew./film/film_crew_gig/film_crew_role	/m/0ch6mp2
/m/0k4fz	/film/film/release_date_s./film/film_regional_release_date/film_regional_debut_venue	/m/07zmj
/m/073w14	/award/award_nominee/award_nominations./award/award_nomination/award	/m/09sb52
/m/0btbyn	/film/film/genre	/m/0c3351
/m/0k345	/music/genre/artists	/m/01qqwp9
/m/05qtj	/location/location/contains	/m/04gdr
/m/040njc	/award/award_category/nominees./award/award_nomination/nominated_for	/m/0cq806
/m/0bj25	/film/film/language	/m/02h40lc
/m/0bv8h2	/film/film/other_crew./film/film_crew_gig/film_crew_role	/m/0ch6mp2
/m/0343h	/people/person/employment_history./business/employment_tenure/company	/m/0kx4m
/m/02qgyv	/award/award_nominee/award_nominations./award/award_nomination/nominated_for	/m/01hqhm
/m/0262x6	/award/award_category/winners./award/award_honor/award_winner	/m/03772
/m/05b4w	/olympics/olympic_participating_country/athletes./olympics/olympic_athlete_affiliation/olympics	/m/06sks6
/m/06szd3	/award/hall_of_fame/inductees./award/hall_of_fame_induction/inductee	/m/0488g9
/m/05qbckf	/film/film/release_date_s./film/film_regional_release_date/film_release_region	/m/06t2t
/m/05f260	/film/film_distributor/films_distributed./film/film_film_distributor_relationship/film	/m/02q_4ph
/m/03rk0	/location/location/adjoin_s./location/adjoining_relationship/adjoins	/m/0d05w3
/m/0p_pd	/award/award_nominee/award_nominations./award/award_nomination/award_nominee	/m/039bp
/m/06y0xx	/people/person/gender	/m/05zppz
/m/0233bn	/film/film/release_date_s./film/film_regional_release_date/film_release_region	/m/0f8l9c
/m/016tt2	/film/film_distributor/films_distributed./film/film_film_distributor_relationship/film	/m/0g9wdmc
/m/040njc	/award/award_category/nominees./award/award_nomination/nominated_for	/m/0gcrg
/m/0gj9qxr	/film/film/other_crew./film/film_crew_gig/film_crew_role	/m/09vw2b7
/m/0947l	/travel/travel_destination/climate./travel/travel_destination_monthly_climate/month	/m/04wzr
/m/02h40lc	/education/field_of_study/students_majoring./education/education/student	/m/0jt90f5
/m/014ps4	/award/award_nominee/award_nominations./award/award_nomination/award	/m/0262zm
/m/01pfkw	/award/award_nominee/award_nominations./award/award_nomination/nominated_for	/m/03l6q0
/m/01_x6v	/people/person/place_of_birth	/m/02cl1
/m/0422v0	/film/film/genre	/m/02n4kr
/m/01xhh5	/people/ethnicity/geographic_distribution	/m/06qd3
/m/0gz6b6g	/film/film/release_date_s./film/film_regional_release_date/film_release_region	/m/0jgd
/m/0kv238	/film/film/release_date_s./film/film_regional_release_date/film_release_region	/m/0154j
/m/014mlp	/education/educational_degree/people_with_this_degree./education/education/institution	/m/01swxv
/m/09qvms	/award/award_ceremony/awards_presented./award/award_honor/award_winner	/m/06g2d1
/m/016z7s	/film/film/film_production_design_by	/m/04kj2v
/m/0gs96	/award/award_category/nominees./award/award_nomination/nominated_for	/m/09tkzy
/m/0755wz	/award/award_winner/awards_won./award/award_honor/award_winner	/m/03v3xp
/m/03nt7j	/sports/sports_league_draft/picks./sports/sports_league_draft_pick/school	/m/01hx2t
/m/0gk4g	/people/cause_of_death/people	/m/06c44
/m/027hjff	/award/award_ceremony/awards_presented./award/award_honor/award_winner	/m/072bb1
/m/04ztj	/people/marriage_union_type/unions_of_this_type./people/marriage/location_of_ceremony	/m/06npd
/m/03rk0	/location/location/contains	/m/02kxx1
/m/02l4pj	/award/award_nominee/award_nominations./award/award_nomination/award_nominee	/m/03zg2x
/m/019f2f	/award/award_nominee/award_nominations./award/award_nomination/nominated_for	/m/0jym0
/m/01vw917	/people/person/gender	/m/05zppz
/m/0c2tf	/people/person/gender	/m/05zppz
/m/0cj2nl	/award/award_nominee/award_nominations./award/award_nomination/award_nominee	/m/027cxsm
/m/087vz	/olympics/olympic_participating_country/athletes./olympics/olympic_athlete_affiliation/olympics	/m/0jhn7
/m/07s9rl0	/media_common/netflix_genre/titles	/m/01h18v
/m/01_vfy	/film/director/film	/m/0g68zt
/m/063g7l	/people/person/places_lived./people/place_lived/location	/m/0m2rv
/m/09qvms	/award/award_ceremony/awards_presented./award/award_honor/award_winner	/m/06t74h
/m/023361	/people/person/profession	/m/01c72t
/m/02j8z	/education/field_of_study/students_majoring./education/education/major_field_of_study	/m/02mgp
/m/06823p	/film/film/genre	/m/0hn10
/m/09sb52	/award/award_category/nominees./award/award_nomination/nominated_for	/m/01hqhm
/m/0661ql3	/film/film/release_date_s./film/film_regional_release_date/film_release_region	/m/0jgd
/m/04mlmx	/people/person/profession	/m/0np9r
/m/0755wz	/award/award_nominee/award_nominations./award/award_nomination/award	/m/09sb52
/m/0blbxk	/award/award_nominee/award_nominations./award/award_nomination/award_nominee	/m/0154qm
/m/0257pw	/award/award_category/winners./award/award_honor/ceremony	/m/019bk0
/m/03zj_3	/soccer/football_team/current_roster./soccer/football_roster_position/position	/m/0dgrmp
/m/01q940	/organization/organization/headquarters./location/mailing_address/citytown	/m/0chgzm
/m/0dzc16	/award/award_winner/awards_won./award/award_honor/award_winner	/m/0cc5tgk
/m/02_xgp2	/education/educational_degree/people_with_this_degree./education/education/institution	/m/02nq10
/m/01hw5kk	/film/film/executive_produced_by	/m/0343h
/m/02bv9	/language/human_language/countries_spoken_in	/m/0154j
/m/02h40lc	/education/field_of_study/students_majoring./education/education/major_field_of_study	/m/037mh8
/m/0bkmf	/people/person/religion	/m/0c8wxp
/m/027f7dj	/film/actor/film./film/performance/film	/m/03nsm5x
/m/03qc7q6	/people/profession/specialization_of	/m/09j9h
/m/01jmyj	/film/film/other_crew./film/film_crew_gig/crewmember	/m/09pjnd
/m/02ktrs	/people/person/profession	/m/0n1h
/m/026p4q7	/film/film/language	/m/02h40lc
/m/04ztj	/people/marriage_union_type/unions_of_this_type./people/marriage/location_of_ceremony	/m/013ksx
/m/01cpkt	/business/job_title/people_with_this_title./business/employment_tenure/company	/m/01j_x
/m/0hn821n	/award/award_ceremony/awards_presented./award/award_honor/award_winner	/m/0127m7
/m/01rhl	/music/performance_role/track_performances./music/track_contribution/role	/m/03gvt
/m/0147dk	/award/award_nominee/award_nominations./award/award_nomination/nominated_for	/m/032sl_
/m/016tt2	/award/award_winner/awards_won./award/award_honor/award_winner	/m/01b9ck
/m/0gmdkyy	/award/award_ceremony/awards_presented./award/award_honor/award_winner	/m/095zvfg
/m/050rj	/music/performance_role/track_performances./music/track_contribution/role	/m/0mkg
/m/023slg	/music/artist/track_contributions./music/track_contribution/role	/m/0l14qv
/m/064ndc	/film/film/produced_by	/m/06y0xx
/m/0cw51	/location/capital_of_administrative_division/capital_of./location/administrative_division_capital_relationship/administrative_division	/m/0cw4l
/m/0g9wdmc	/film/film/release_date_s./film/film_regional_release_date/film_release_region	/m/03rk0
/m/07s9rl0	/media_common/netflix_genre/titles	/m/05n6sq
/m/02r8hh_	/film/film/release_date_s./film/film_regional_release_date/film_release_region	/m/06t2t
/m/01w9k25	/award/award_nominee/award_nominations./award/award_nomination/award_nominee	/m/026yqrr
/m/0gx9rvq	/film/film/other_crew./film/film_crew_gig/film_crew_role	/m/0ch6mp2
/m/0d4fqn	/award/award_nominee/award_nominations./award/award_nomination/award_nominee	/m/02wk_43
/m/02qgqt	/award/award_winner/awards_won./award/award_honor/award_winner	/m/01qqtr
/m/06g2d1	/award/award_nominee/award_nominations./award/award_nomination/nominated_for	/m/05sy_5
/m/035d1m	/olympics/olympic_sport/athletes./olympics/olympic_athlete_affiliation/country	/m/0154j
/m/084l5	/sports/sports_team/roster./american_football/football_historical_roster_position/position_s	/m/0b13yt
/m/02x6dqb	/film/film/genre	/m/0hn10
/m/01bcp7	/people/cause_of_death/people	/m/02lvtb
/m/0kryqm	/people/person/spouse_s./people/marriage/type_of_union	/m/04ztj
/m/016vg8	/film/actor/film./film/performance/film	/m/02qlp4
/m/0fh2v5	/film/film/genre	/m/026ny
/m/0gfsq9	/award/award_winning_work/awards_won./award/award_honor/award_winner	/m/0147dk
/m/0fpkhkz	/film/film/language	/m/02h40lc
/m/02b25y	/people/person/religion	/m/0c8wxp
/m/05r3qc	/film/film/other_crew./film/film_crew_gig/film_crew_role	/m/09vw2b7
/m/011yhm	/award/award_winning_work/awards_won./award/award_honor/award	/m/02x4x18
/m/0bxs_d	/award/award_ceremony/awards_presented./award/award_honor/award_winner	/m/04wp2p
/m/0315q3	/award/award_nominee/award_nominations./award/award_nomination/award_nominee	/m/05mkhs
/m/0343h	/people/person/languages	/m/02h40lc
/m/01p7yb	/film/actor/film./film/performance/film	/m/05c26ss
/m/015vq_	/film/actor/film./film/performance/film	/m/016ks5
/m/0bzm__	/award/award_ceremony/awards_presented./award/award_honor/award_winner	/m/01l9v7n
/m/04chyn	/education/educational_institution/students_graduates./education/education/major_field_of_study	/m/0g26h
/m/02x2khw	/sports/sports_league_draft/picks./sports/sports_league_draft_pick/school	/m/02klny
/m/01hw5kk	/film/film/genre	/m/02l7c8
/m/04v09	/location/location/adjoin_s./location/adjoining_relationship/adjoins	/m/0h3y
/m/01c5d5	/people/person/spouse_s./people/marriage/type_of_union	/m/04ztj
/m/019f2f	/people/person/religion	/m/0c8wxp
/m/011yhm	/film/film/language	/m/02h40lc
/m/06m_5	/location/location/adjoin_s./location/adjoining_relationship/adjoins	/m/03rk0
/m/0154j	/location/country/official_language	/m/02bv9
/m/05lb30	/award/award_nominee/award_nominations./award/award_nomination/award_nominee	/m/026zvx7
/m/03c6v3	/base/popstra/celebrity/dated./base/popstra/dated/participant	/m/01hxs4
/m/01v3s2_	/base/saturdaynightlive/snl_cast_member/seasons./base/saturdaynightlive/snl_season_tenure/cast_members	/m/04s430
/m/0h3tv	/travel/travel_destination/climate./travel/travel_destination_monthly_climate/month	/m/028kb
/m/0gkg6	/people/person/profession	/m/016z4k
/m/025m8y	/award/award_category/winners./award/award_honor/ceremony	/m/019bk0
/m/07b3r9	/award/award_nominee/award_nominations./award/award_nomination/award_nominee	/m/0bkf72
/m/05g_nr	/base/marchmadness/ncaa_basketball_tournament/seeds./base/marchmadness/ncaa_tournament_seed/team	/m/02pjzvh
/m/0cwx_	/education/educational_institution/students_graduates./education/education/major_field_of_study	/m/06mnr
/m/027cxsm	/award/award_winner/awards_won./award/award_honor/award_winner	/m/048wrb
/m/016tt2	/film/film_distributor/films_distributed./film/film_film_distributor_relationship/film	/m/09bw4_
/m/07rd7	/award/award_nominee/award_nominations./award/award_nomination/nominated_for	/m/027pfg
/m/03k7bd	/award/award_nominee/award_nominations./award/award_nomination/award_nominee	/m/01kwsg
/m/0fqxw	/location/location/adjoin_s./location/adjoining_relationship/adjoins	/m/0fqxc
/m/01ztgm	/base/popstra/celebrity/dated./base/popstra/dated/participant	/m/02ts3h
/m/0b7xl8	/award/award_nominee/award_nominations./award/award_nomination/award_nominee	/m/07h07
/m/01wj18h	/people/person/employment_history./business/employment_tenure/company	/m/043g7l
/m/02825kb	/film/film/genre	/m/02l7c8
/m/0kv238	/film/film/release_date_s./film/film_regional_release_date/film_release_region	/m/06npd
/m/04kxsb	/award/award_category/winners./award/award_honor/award_winner	/m/040z9
/m/01p4vl	/award/award_nominee/award_nominations./award/award_nomination/award_nominee	/m/019pm_
/m/012vby	/people/deceased_person/place_of_death	/m/0k049
/m/0cjdk	/organization/organization/headquarters./location/mailing_address/state_province_region	/m/01n7q
/m/07b8m1	/soccer/football_team/current_roster./sports/sports_team_roster/position	/m/0dgrmp
/m/07s9rl0	/media_common/netflix_genre/titles	/m/01br2w
/m/0c3dzk	/people/person/spouse_s./people/marriage/type_of_union	/m/04ztj
/m/09bw4_	/film/film/language	/m/02h40lc
/m/0l76z	/award/award_winning_work/awards_won./award/award_honor/award_winner	/m/070j61
/m/07brj	/music/performance_role/track_performances./music/track_contribution/role	/m/03gvt
/m/0c53vt	/award/award_ceremony/awards_presented./award/award_honor/award_winner	/m/01jpmpv
/m/0tfc	/influence/influence_node/influenced_by	/m/043s3
/m/02vtnf	/people/person/spouse_s./people/marriage/type_of_union	/m/04ztj
/m/01zkxv	/influence/influence_node/peers./influence/peer_relationship/peers	/m/0j0pf
/m/06kl0k	/people/person/languages	/m/02h40lc
/m/06chvn	/people/person/gender	/m/05zppz
/m/07l8x	/baseball/baseball_team/team_stats./baseball/baseball_team_stats/season	/m/0285r5d
/m/014mlp	/education/educational_degree/people_with_this_degree./education/education/major_field_of_study	/m/0193x
/m/03hfxx	/people/person/nationality	/m/03rk0
/m/0cc8q3	/base/marchmadness/ncaa_basketball_tournament/seeds./base/marchmadness/ncaa_tournament_seed/team	/m/026w398
/m/01gfq4	/music/record_label/artist	/m/01nz1q6
/m/01hww_	/music/performance_role/regular_performances./music/group_membership/role	/m/0l14qv
/m/0190_q	/music/genre/artists	/m/01_wfj
/m/0crjn65	/base/aareas/schema/administrative_area/administrative_parent	/m/0dbdy
/m/04yc76	/film/film/other_crew./film/film_crew_gig/film_crew_role	/m/09vw2b7
/m/03j149k	/people/person/places_lived./people/place_lived/location	/m/02zp1t
/m/039bp	/award/award_nominee/award_nominations./award/award_nomination/nominated_for	/m/0hvvf
/m/04cl1	/award/award_nominee/award_nominations./award/award_nomination/award_nominee	/m/02bvt
/m/05c46y6	/award/award_winning_work/awards_won./award/award_honor/award	/m/02x4x18
/m/01t8399	/people/person/gender	/m/05zppz
/m/0392kz	/people/person/profession	/m/0np9r
/m/02qyntr	/award/award_category/nominees./award/award_nomination/nominated_for	/m/0661ql3
/m/0343h	/award/award_nominee/award_nominations./award/award_nomination/award_nominee	/m/016tt2
/m/0283d	/music/genre/parent_genre	/m/06__c
/m/060j8b	/people/person/languages	/m/02h40lc
/m/0fby2t	/film/actor/film./film/performance/film	/m/0bvn25
/m/0dgrmp	/sports/sports_position/players./sports/sports_team_roster/team	/m/03c0vy
/m/02r8hh_	/film/film/release_date_s./film/film_regional_release_date/film_release_region	/m/0154j
/m/07jqjx	/film/film/genre	/m/07s9rl0
/m/0clvcx	/award/award_nominee/award_nominations./award/award_nomination/award_nominee	/m/05y5kf
/m/01w_d6	/sports/sports_team/colors	/m/088fh
/m/0151xv	/film/actor/film./film/performance/film	/m/0m9p3
/m/084nh	/award/award_nominee/award_nominations./award/award_nomination/award	/m/0ddd9
/m/063g7l	/people/person/profession	/m/0np9r
/m/0bth54	/film/film/other_crew./film/film_crew_gig/film_crew_role	/m/0215hd
/m/03rwz3	/film/film_distributor/films_distributed./film/film_film_distributor_relationship/film	/m/0gtvpkw
/m/06msq2	/award/award_nominee/award_nominations./award/award_nomination/award_nominee	/m/05bnq3j
/m/045g4l	/people/person/sibling_s./people/sibling_relationship/sibling	/m/030dx5
/m/0hmr4	/award/award_winning_work/awards_won./award/award_honor/award	/m/02qyntr
/m/02m92h	/award/award_nominee/award_nominations./award/award_nomination/award_nominee	/m/05fnl9
/m/05c26ss	/film/film/release_date_s./film/film_regional_release_date/film_release_region	/m/05b4w
[truncated: 7,739 more rows]
