# Supplementary material
Source: ML conference proceedings conference paper supplement (https://proceedings.neurips.cc/paper_files/paper/2021/hash/0fd600c953cde8121262e322ef09f70e-Abstract.html)
Supplement: Supplementary file 1 [file 0fd600c953cde8121262e322ef09f70e-Supplemental.zip › Supplementary_Material_Paper_8745/data/GraIL-BM_fb237_v2/train/valid.txt]

/m/015npr	/people/person/nationality	/m/03rk0
/m/05d1dy	/award/award_nominee/award_nominations./award/award_nomination/nominated_for	/m/01ffx4
/m/0n85g	/music/record_label/artist	/m/0gbwp
/m/04ztj	/people/marriage_union_type/unions_of_this_type./people/marriage/location_of_ceremony	/m/07dfk
/m/045n3p	/people/person/religion	/m/0flw86
/m/03czqs	/travel/travel_destination/climate./travel/travel_destination_monthly_climate/month	/m/02xx5
/m/049k07	/award/award_nominee/award_nominations./award/award_nomination/award_nominee	/m/03m8lq
/m/01swxv	/education/educational_institution/students_graduates./education/education/major_field_of_study	/m/0g26h
/m/01pw2f1	/base/popstra/celebrity/canoodled./base/popstra/canoodled/participant	/m/039bpc
/m/04ddm4	/film/film/written_by	/m/06d6y
/m/076tq0z	/film/film/language	/m/064_8sq
/m/0x67	/people/ethnicity/people	/m/01w9k25
/m/02_jkc	/award/award_nominee/award_nominations./award/award_nomination/award_nominee	/m/02qmncd
/m/0cc07	/location/us_county/county_seat	/m/0dhml
/m/027hjff	/award/award_ceremony/awards_presented./award/award_honor/award_winner	/m/02y_2y
/m/01693z	/people/person/profession	/m/016z4k
/m/07s9rl0	/media_common/netflix_genre/titles	/m/08rr3p
/m/04wg38	/award/award_winner/awards_won./award/award_honor/award_winner	/m/03fbb6
/m/0mkg	/music/performance_role/regular_performances./music/group_membership/group	/m/09z1lg
/m/07qg8v	/film/film/release_date_s./film/film_regional_release_date/film_release_region	/m/06qd3
/m/03h_0_z	/people/person/profession	/m/016z4k
/m/0czp_	/award/award_category/winners./award/award_honor/award_winner	/m/0gv5c
/m/01nhkxp	/award/award_nominee/award_nominations./award/award_nomination/award_nominee	/m/01vvydl
/m/0661ql3	/film/film/release_date_s./film/film_regional_release_date/film_release_region	/m/0h7x
/m/01tpl1p	/people/person/profession	/m/016z4k
/m/01669b	/base/aareas/schema/administrative_area/administrative_parent	/m/0d05w3
/m/0c9l1	/music/artist/origin	/m/0q_0z
/m/0k3gj	/location/location/contains	/m/0tygl
/m/05qbckf	/film/film/written_by	/m/070yzk
/m/02x6dqb	/film/film/other_crew./film/film_crew_gig/film_crew_role	/m/0ch6mp2
/m/0bgv4g	/sports/sports_position/players./sports/sports_team_roster/team	/m/0289q
/m/016z1c	/people/person/spouse_s./people/marriage/type_of_union	/m/04ztj
/m/05y5kf	/people/person/gender	/m/05zppz
/m/014v6f	/film/actor/film./film/performance/film	/m/0f7hw
/m/084nh	/people/person/languages	/m/02h40lc
/m/058kqy	/people/person/profession	/m/0dxtg
/m/0401sg	/film/film/release_date_s./film/film_regional_release_date/film_release_region	/m/06t2t
/m/07wbk	/government/political_party/politicians_in_this_party./government/political_party_tenure/politician	/m/03d9v8
/m/02hkv5	/people/person/spouse_s./people/marriage/type_of_union	/m/04ztj
/m/0gtxj2q	/film/film/release_date_s./film/film_regional_release_date/film_release_region	/m/0154j
/m/01w524f	/people/person/gender	/m/05zppz
/m/011yg9	/award/award_winning_work/awards_won./award/award_honor/award	/m/040njc
/m/03k7bd	/award/award_nominee/award_nominations./award/award_nomination/award	/m/0789_m
/m/01ckhj	/film/actor/film./film/performance/film	/m/0_b9f
/m/02_fm2	/film/film/production_companies	/m/04rcl7
/m/02t_8z	/award/award_nominee/award_nominations./award/award_nomination/award_nominee	/m/055sjw
/m/0473rc	/film/film/other_crew./film/film_crew_gig/film_crew_role	/m/09vw2b7
/m/02wk4d	/people/person/gender	/m/05zppz
/m/03k7bd	/award/award_nominee/award_nominations./award/award_nomination/award_nominee	/m/05mkhs
/m/0h7pj	/base/popstra/celebrity/dated./base/popstra/dated/participant	/m/019pm_
/m/0154j	/olympics/olympic_participating_country/medals_won./olympics/olympic_medal_honor/olympics	/m/0sxrz
/m/01v3ht	/education/educational_institution/colors	/m/088fh
/m/07tvwy	/people/person/gender	/m/05zppz
/m/040njc	/award/award_category/nominees./award/award_nomination/nominated_for	/m/07j8r
/m/01xn7x1	/soccer/football_team/current_roster./sports/sports_team_roster/position	/m/0dgrmp
/m/025b5y	/award/award_nominee/award_nominations./award/award_nomination/nominated_for	/m/0bvn25
/m/01vw26l	/people/person/languages	/m/02h40lc
/m/0sx5w	/people/person/profession	/m/08z956
/m/07jbh	/olympics/olympic_sport/athletes./olympics/olympic_athlete_affiliation/country	/m/0d05w3
/m/014mlp	/education/educational_degree/people_with_this_degree./education/education/institution	/m/07xpm
/m/02y_lrp	/film/film/genre	/m/02l7c8
/m/015npr	/people/person/religion	/m/0flw86
/m/03cz9_	/people/person/gender	/m/05zppz
/m/018mxj	/business/business_operation/industry	/m/0vg8
/m/02tgz4	/film/film/genre	/m/0jdm8
/m/01v1d8	/music/performance_role/regular_performances./music/group_membership/group	/m/04qmr
/m/02x0bdb	/people/person/gender	/m/05zppz
/m/07rd7	/film/director/film	/m/01hq1
/m/0l14qv	/music/performance_role/regular_performances./music/group_membership/role	/m/05kms
/m/0l14md	/music/performance_role/regular_performances./music/group_membership/role	/m/0mkg
/m/05b4w	/military/military_combatant/military_conflicts./military/military_combatant_group/combatants	/m/0154j
/m/05qbckf	/film/film/language	/m/064_8sq
/m/01vvydl	/award/award_nominee/award_nominations./award/award_nomination/award	/m/03t5b6
/m/0807ml	/film/actor/film./film/performance/film	/m/03p2xc
/m/01vdm0	/music/performance_role/track_performances./music/track_contribution/role	/m/05842k
/m/0154j	/location/location/adjoin_s./location/adjoining_relationship/adjoins	/m/0f8l9c
/m/0jqzt	/film/film/release_date_s./film/film_regional_release_date/film_release_region	/m/0h7x
/m/05mkhs	/award/award_nominee/award_nominations./award/award_nomination/award_nominee	/m/0315q3
/m/02dh86	/people/person/spouse_s./people/marriage/type_of_union	/m/04ztj
/m/08nvyr	/film/film/genre	/m/07s9rl0
/m/06xj93	/soccer/football_team/current_roster./soccer/football_roster_position/position	/m/0dgrmp
/m/0jhn7	/olympics/olympic_games/sports	/m/018jz
/m/02x4x18	/award/award_category/nominees./award/award_nomination/nominated_for	/m/047myg9
/m/017g2y	/film/actor/film./film/performance/film	/m/026p_bs
/m/01zmpg	/people/person/profession	/m/016z4k
/m/0cf08	/film/film/genre	/m/07s9rl0
/m/05ch98	/film/film/genre	/m/07s9rl0
/m/0cf08	/award/award_nominated_work/award_nominations./award/award_nomination/nominated_for	/m/0140g4
/m/0141kz	/people/person/places_lived./people/place_lived/location	/m/06y9v
/m/03m8lq	/people/person/languages	/m/02h40lc
/m/01kvrz	/education/educational_institution/students_graduates./education/education/major_field_of_study	/m/064_8sq
/m/02h9_l	/people/person/places_lived./people/place_lived/location	/m/013yq
/m/0fby2t	/people/person/profession	/m/0np9r
/m/01n7q	/location/location/contains	/m/0l2rj
/m/02y21l	/music/record_label/artist	/m/09prnq
/m/0645k5	/film/film/release_date_s./film/film_regional_release_date/film_release_region	/m/04gzd
/m/05842k	/music/performance_role/track_performances./music/track_contribution/role	/m/03qlv7
/m/094wz7q	/award/award_nominee/award_nominations./award/award_nomination/nominated_for	/m/040b5k
/m/0382m4	/award/award_nominee/award_nominations./award/award_nomination/award_nominee	/m/0276jmv
/m/0c40vxk	/film/film/release_date_s./film/film_regional_release_date/film_release_region	/m/03rk0
/m/0gx_p	/film/actor/film./film/performance/film	/m/01hq1
/m/01n7q	/location/location/adjoin_s./location/adjoining_relationship/adjoins	/m/05rgl
/m/0mkg	/music/performance_role/regular_performances./music/group_membership/role	/m/0l14qv
/m/0jnmj	/sports/sports_team/colors	/m/06kqt3
/m/06gn7r	/people/person/profession	/m/0dxtg
/m/0cn68	/people/ethnicity/people	/m/08x5c_
/m/01nz1q6	/people/person/place_of_birth	/m/07dfk
/m/03gh4	/location/location/contains	/m/0lmgy
/m/02cllz	/people/person/gender	/m/05zppz
/m/0c9l1	/award/award_nominee/award_nominations./award/award_nomination/award	/m/02f716
/m/0blst_	/award/award_category/winners./award/award_honor/award_winner	/m/02wlk
/m/018w8	/sports/sport/pro_athletes./sports/pro_sports_played/athlete	/m/012xdf
/m/0kryqm	/award/award_nominee/award_nominations./award/award_nomination/award_nominee	/m/065ydwb
/m/014mlp	/education/educational_degree/people_with_this_degree./education/education/institution	/m/02lv2v
/m/02wgln	/people/person/spouse_s./people/marriage/type_of_union	/m/04ztj
/m/0459z	/people/person/gender	/m/05zppz
/m/01vyp_	/people/person/profession	/m/01c72t
/m/02ts3h	/people/person/spouse_s./people/marriage/type_of_union	/m/04ztj
/m/0cz_ym	/film/film/produced_by	/m/06chf
/m/0fpkhkz	/award/award_winning_work/awards_won./award/award_honor/award	/m/02rdxsh
/m/079ws	/award/award_winner/awards_won./award/award_honor/award_winner	/m/079vf
/m/0bzrsh	/base/marchmadness/ncaa_basketball_tournament/seeds./base/marchmadness/ncaa_tournament_seed/team	/m/02pjzvh
/m/0140g4	/award/award_winning_work/awards_won./award/award_honor/honored_for	/m/04cbbz
/m/02x6dqb	/film/film/language	/m/02h40lc
/m/0l14md	/music/performance_role/track_performances./music/track_contribution/role	/m/0l15bq
/m/02kxjx	/military/military_conflict/combatants./military/military_combatant_group/combatants	/m/02psqkz
/m/0bwjj	/sports/professional_sports_team/draft_picks./sports/sports_league_draft_pick/draft	/m/09th87
/m/05bm4sm	/award/award_winner/awards_won./award/award_honor/award_winner	/m/04ktcgn
/m/02whj	/music/group_member/membership./music/group_membership/group	/m/01qqwp9
/m/018417	/award/award_nominee/award_nominations./award/award_nomination/award_nominee	/m/05kh_
/m/0gk4g	/people/cause_of_death/people	/m/034q3l
/m/0fqjhm	/award/award_nominee/award_nominations./award/award_nomination/award_nominee	/m/019pm_
/m/0q9t7	/people/person/place_of_birth	/m/01qh7
/m/03ryks	/people/person/spouse_s./people/marriage/type_of_union	/m/04ztj
/m/02s5v5	/people/person/profession	/m/0dxtg
/m/0pc62	/film/film/other_crew./film/film_crew_gig/film_crew_role	/m/01pvkk
/m/04ztj	/people/marriage_union_type/unions_of_this_type./people/marriage/location_of_ceremony	/m/07tcs
/m/090s_0	/tv/tv_program/regular_cast./tv/regular_tv_appearance/actor	/m/019_1h
/m/04sry	/award/award_nominee/award_nominations./award/award_nomination/award	/m/0gkr9q
/m/09ntbc	/people/person/gender	/m/05zppz
/m/0chgzm	/travel/travel_destination/how_to_get_here./travel/transportation/mode_of_transportation	/m/07jdr
/m/017l4	/music/artist/track_contributions./music/track_contribution/role	/m/0l14qv
/m/0275n3y	/award/award_ceremony/awards_presented./award/award_honor/honored_for	/m/01ry_x
/m/0g2lq	/tv/tv_producer/programs_produced./tv/tv_producer_term/program	/m/02kk_c
/m/0dgrmp	/sports/sports_position/players./sports/sports_team_roster/team	/m/01j95f
/m/01g7_r	/education/educational_institution/students_graduates./education/education/major_field_of_study	/m/037mh8
/m/08x5c_	/people/person/gender	/m/05zppz
/m/0gtxj2q	/film/film/genre	/m/02l7c8
/m/07ghv5	/film/film/genre	/m/07s9rl0
/m/03v3xp	/film/actor/film./film/performance/film	/m/011ywj
/m/0d05w3	/olympics/olympic_participating_country/medals_won./olympics/olympic_medal_honor/olympics	/m/0jhn7
/m/01qbl	/music/performance_role/track_performances./music/track_contribution/role	/m/0l15f_
/m/0lgsq	/award/award_nominee/award_nominations./award/award_nomination/award	/m/0gqz2
/m/05q7cj	/time/event/instance_of_recurring_event	/m/0g_w
/m/02h4rq6	/education/educational_degree/people_with_this_degree./education/education/institution	/m/01kvrz
/m/0yxl	/people/person/profession	/m/0dxtg
/m/01n951	/education/educational_institution/students_graduates./education/education/student	/m/07hyk
/m/04g5k	/location/location/adjoin_s./location/adjoining_relationship/adjoins	/m/04gzd
/m/02qyntr	/award/award_category/nominees./award/award_nomination/nominated_for	/m/017jd9
/m/09v9mks	/film/film/release_date_s./film/film_regional_release_date/film_release_region	/m/04gzd
/m/02mjs7	/education/educational_degree/people_with_this_degree./education/education/institution	/m/01jvxb
/m/09blyk	/media_common/netflix_genre/titles	/m/084302
/m/05rgl	/location/location/partially_contains	/m/0f8l9c
/m/0k269	/award/award_nominee/award_nominations./award/award_nomination/award	/m/09sb52
/m/0l14md	/music/instrument/instrumentalists	/m/01w58n3
/m/01c1nm	/location/administrative_division/country	/m/03rk0
/m/0484q	/people/person/profession	/m/039v1
/m/01713c	/people/person/languages	/m/02h40lc
/m/019mcm	/soccer/football_team/current_roster./soccer/football_roster_position/position	/m/0dgrmp
/m/05l4yg	/people/person/places_lived./people/place_lived/location	/m/0h6l4
/m/02mmwk	/film/film/other_crew./film/film_crew_gig/film_crew_role	/m/0ch6mp2
/m/0bgv4g	/sports/sports_position/players./sports/sports_team_roster/team	/m/0fht9f
/m/09qj50	/award/award_category/nominees./award/award_nomination/nominated_for	/m/034fl9
/m/05dbyt	/people/person/spouse_s./people/marriage/type_of_union	/m/04ztj
/m/05wkw	/people/profession/specialization_of	/m/0n1h
/m/0dq3c	/government/government_office_category/officeholders./government/government_position_held/jurisdiction_of_office	/m/0166v
/m/0824r	/location/statistical_region/religions./location/religion_percentage/religion	/m/0631_
/m/04kxsb	/award/award_category/nominees./award/award_nomination/nominated_for	/m/0m313
/m/09sb52	/award/award_category/winners./award/award_honor/award_winner	/m/05fnl9
/m/01p7yb	/award/award_nominee/award_nominations./award/award_nomination/award_nominee	/m/02qgqt
/m/05vtbl	/people/person/gender	/m/05zppz
/m/076xkps	/film/film/language	/m/02h40lc
/m/039bp	/award/award_nominee/award_nominations./award/award_nomination/award_nominee	/m/0p_pd
/m/098sx	/people/person/spouse_s./people/marriage/type_of_union	/m/04ztj
/m/0l14md	/music/performance_role/regular_performances./music/group_membership/role	/m/0gkd1
/m/0dhml	/location/hud_county_place/county	/m/0cc07
/m/090q8l	/soccer/football_team/current_roster./sports/sports_team_roster/position	/m/0dgrmp
/m/02wgln	/award/award_nominee/award_nominations./award/award_nomination/award_nominee	/m/0bqdvt
/m/09yhzs	/award/award_nominee/award_nominations./award/award_nomination/nominated_for	/m/0fqt1ns
/m/03ts0c	/people/ethnicity/geographic_distribution	/m/0f8l9c
/m/087vz	/military/military_combatant/military_conflicts./military/military_combatant_group/combatants	/m/0154j
/m/09sb52	/award/award_category/nominees./award/award_nomination/nominated_for	/m/0277j40
/m/03818y	/organization/organization/headquarters./location/mailing_address/citytown	/m/013yq
/m/013yq	/travel/travel_destination/climate./travel/travel_destination_monthly_climate/month	/m/04wzr
/m/09v9mks	/film/film/release_date_s./film/film_regional_release_date/film_release_region	/m/0d0vqn
/m/0clvcx	/people/person/spouse_s./people/marriage/type_of_union	/m/04ztj
/m/016tt2	/film/film_distributor/films_distributed./film/film_film_distributor_relationship/film	/m/0h1cdwq
/m/0bq0p9	/military/military_combatant/military_conflicts./military/military_combatant_group/combatants	/m/0f8l9c
/m/01vw8k	/film/film/genre	/m/02l7c8
/m/0d05w3	/olympics/olympic_participating_country/athletes./olympics/olympic_athlete_affiliation/olympics	/m/0jhn7
/m/09gdm7q	/film/film/genre	/m/07s9rl0
/m/06szd3	/award/hall_of_fame/inductees./award/hall_of_fame_induction/inductee	/m/0161h5
/m/07s9rl0	/media_common/netflix_genre/titles	/m/08fn5b
/m/049w1q	/film/film/release_date_s./film/film_regional_release_date/film_release_region	/m/05b4w
/m/05y5kf	/award/award_nominee/award_nominations./award/award_nomination/award_nominee	/m/02w9895
/m/07bzz7	/film/film/language	/m/02h40lc
/m/09v9mks	/film/film/release_date_s./film/film_regional_release_date/film_release_region	/m/0154j
/m/0ddd9	/award/award_category/winners./award/award_honor/award_winner	/m/084nh
/m/0dfw0	/film/film/distributors./film/film_film_distributor_relationship/film_distribution_medium	/m/0dq6p
/m/0l15f_	/music/performance_role/track_performances./music/track_contribution/role	/m/023r2x
/m/0m313	/award/award_winning_work/awards_won./award/award_honor/award	/m/09qwmm
/m/079vf	/film/actor/film./film/performance/film	/m/0fqt1ns
/m/0382m4	/award/award_nominee/award_nominations./award/award_nomination/award_nominee	/m/070yzk
/m/01n6r0	/education/educational_institution/students_graduates./education/education/student	/m/01v3vp
/m/0gk4g	/people/cause_of_death/people	/m/0151xv
/m/01p4vl	/base/popstra/celebrity/dated./base/popstra/dated/participant	/m/019pm_
/m/0b13yt	/sports/sports_position/players./sports/sports_team_roster/team	/m/01y3c
/m/04w391	/film/actor/film./film/performance/film	/m/02qkwl
/m/02779r4	/award/award_nominee/award_nominations./award/award_nomination/award_nominee	/m/05fnl9
/m/08sfxj	/film/film/genre	/m/02l7c8
/m/076xkps	/film/film/other_crew./film/film_crew_gig/film_crew_role	/m/01pvkk
/m/019pm_	/award/award_nominee/award_nominations./award/award_nomination/award_nominee	/m/04w391
/m/0fby2t	/award/award_nominee/award_nominations./award/award_nomination/award	/m/0c422z4
/m/02_xgp2	/education/educational_degree/people_with_this_degree./education/education/institution	/m/018sg9
/m/05dtwm	/award/award_nominee/award_nominations./award/award_nomination/award_nominee	/m/01rzqj
/m/01jz6x	/award/award_nominee/award_nominations./award/award_nomination/award	/m/09qvc0
/m/019w9j	/olympics/olympic_sport/athletes./olympics/olympic_athlete_affiliation/olympics	/m/06sks6
/m/081k8	/people/person/profession	/m/05z96
/m/02k_kn	/music/genre/artists	/m/0168cl
/m/052hl	/award/award_nominee/award_nominations./award/award_nomination/nominated_for	/m/0291hr
/m/049w1q	/film/film/release_date_s./film/film_regional_release_date/film_release_region	/m/0d0vqn
/m/0p_pd	/people/person/gender	/m/05zppz
/m/0dyztm	/award/award_nominee/award_nominations./award/award_nomination/award_nominee	/m/02l6dy
/m/051zy_b	/award/award_winning_work/awards_won./award/award_honor/award_winner	/m/019pm_
/m/02_t2t	/people/person/spouse_s./people/marriage/type_of_union	/m/04ztj
/m/06qjgc	/people/person/nationality	/m/0jgd
/m/09kvv	/education/educational_institution/students_graduates./education/education/major_field_of_study	/m/0cd78
/m/02r4qs	/people/person/gender	/m/05zppz
/m/0c7t58	/award/award_winner/awards_won./award/award_honor/award_winner	/m/0cp9f9
/m/02z3zp	/film/actor/film./film/performance/film	/m/05qbckf
/m/040b5k	/film/film/genre	/m/02l7c8
/m/01rr31	/education/educational_institution/colors	/m/038hg
/m/06gn7r	/people/person/spouse_s./people/marriage/type_of_union	/m/04ztj
/m/06cv1	/award/award_nominee/award_nominations./award/award_nomination/award_nominee	/m/01mkn_d
/m/05sy_5	/film/film/language	/m/02h40lc
/m/0gfh84d	/film/film/genre	/m/07s9rl0
/m/014mlp	/education/educational_degree/people_with_this_degree./education/education/institution	/m/09hgk
/m/03zg2x	/award/award_winner/awards_won./award/award_honor/award_winner	/m/02mt4k
/m/027f7dj	/film/actor/film./film/performance/film	/m/03hp2y1
/m/0fxky3	/people/person/spouse_s./people/marriage/type_of_union	/m/04ztj
/m/0p_pd	/film/actor/film./film/performance/film	/m/08s6mr
/m/02_xgp2	/education/educational_degree/people_with_this_degree./education/education/institution	/m/01n6r0
/m/07s9rl0	/media_common/netflix_genre/titles	/m/047fjjr
/m/01ycfv	/people/person/gender	/m/05zppz
/m/0b_dy	/award/award_nominee/award_nominations./award/award_nomination/award	/m/09sb52
/m/0qmfz	/award/award_winning_work/awards_won./award/award_honor/award	/m/09cm54
/m/08nvyr	/film/film/language	/m/02h40lc
/m/0fy2s1	/people/person/nationality	/m/03rk0
/m/07r4c	/music/artist/track_contributions./music/track_contribution/role	/m/0l14qv
/m/04f9r2	/award/award_nominee/award_nominations./award/award_nomination/award	/m/054krc
/m/06z6r	/olympics/olympic_sport/athletes./olympics/olympic_athlete_affiliation/country	/m/07ylj
/m/02xbyr	/film/film/release_date_s./film/film_regional_release_date/film_release_region	/m/06qd3
/m/05h43ls	/film/film/other_crew./film/film_crew_gig/film_crew_role	/m/0ch6mp2
/m/03ln8b	/award/award_winning_work/awards_won./award/award_honor/award	/m/09qj50
/m/03xpfzg	/award/award_nominee/award_nominations./award/award_nomination/nominated_for	/m/07c72
/m/0b05xm	/award/award_nominee/award_nominations./award/award_nomination/award_nominee	/m/027hnjh
/m/06crng	/award/award_nominee/award_nominations./award/award_nomination/nominated_for	/m/05_5_22
/m/0947l	/travel/travel_destination/how_to_get_here./travel/transportation/mode_of_transportation	/m/07jdr
/m/05h5nb8	/award/award_category/nominees./award/award_nomination/nominated_for	/m/07qg8v
/m/08kp57	/people/person/spouse_s./people/marriage/type_of_union	/m/04ztj
/m/01_x6v	/people/person/profession	/m/0dxtg
/m/0pvms	/film/film/other_crew./film/film_crew_gig/film_crew_role	/m/09vw2b7
/m/09sb52	/award/award_category/winners./award/award_honor/award_winner	/m/01713c
/m/01t8399	/music/group_member/membership./music/group_membership/role	/m/014zz1
/m/05zvq6g	/award/award_category/nominees./award/award_nomination/nominated_for	/m/07qg8v
/m/06t2t	/travel/travel_destination/climate./travel/travel_destination_monthly_climate/month	/m/02xx5
/m/045j3w	/film/film/release_date_s./film/film_regional_release_date/film_release_region	/m/0d0vqn
/m/0k4fz	/film/film/music	/m/02wb6d
/m/014mlp	/education/educational_degree/people_with_this_degree./education/education/major_field_of_study	/m/01lj9
/m/0b7l4x	/film/film/other_crew./film/film_crew_gig/film_crew_role	/m/0ch6mp2
/m/02h1rt	/award/award_nominee/award_nominations./award/award_nomination/award	/m/0gs96
/m/037cr1	/film/film/other_crew./film/film_crew_gig/film_crew_role	/m/0ch6mp2
/m/0pksh	/award/award_nominee/award_nominations./award/award_nomination/award	/m/09v0wy2
/m/01vw20h	/award/award_nominee/award_nominations./award/award_nomination/award	/m/03t5b6
/m/02p8v8	/people/person/gender	/m/05zppz
/m/03zg2x	/award/award_nominee/award_nominations./award/award_nomination/award_nominee	/m/02l4pj
/m/04smkr	/award/award_winner/awards_won./award/award_honor/award_winner	/m/02p65p
/m/01w0yrc	/people/person/place_of_birth	/m/0hptm
/m/0n85g	/music/record_label/artist	/m/03ryks
/m/02ywhz	/award/award_ceremony/awards_presented./award/award_honor/award_winner	/m/07h07
/m/02qvhbb	/people/person/gender	/m/05zppz
/m/028tv0	/music/performance_role/regular_performances./music/group_membership/group	/m/04qmr
/m/01vvydl	/award/award_nominee/award_nominations./award/award_nomination/award_nominee	/m/026yqrr
/m/026wmz6	/business/business_operation/industry	/m/020mfr
/m/017z88	/education/educational_institution/students_graduates./education/education/student	/m/01v3vp
/m/0cqhk0	/award/award_category/winners./award/award_honor/award_winner	/m/01h910
/m/07nxnw	/film/film/genre	/m/01zhp
/m/0j_tw	/film/film/release_date_s./film/film_regional_release_date/film_release_region	/m/0d0vqn
/m/03s2dj	/people/person/gender	/m/05zppz
/m/0z07	/business/business_operation/industry	/m/0vg8
/m/07swvb	/award/award_nominee/award_nominations./award/award_nomination/award	/m/09sb52
/m/04kxsb	/award/award_category/nominees./award/award_nomination/nominated_for	/m/01h18v
/m/0l14qv	/music/instrument/instrumentalists	/m/01yzl2
/m/09p0ct	/film/film/language	/m/02h40lc
/m/037n97	/music/genre/artists	/m/0135xb
/m/0cj2w	/people/person/spouse_s./people/marriage/type_of_union	/m/04ztj
/m/01vdm0	/music/performance_role/regular_performances./music/group_membership/role	/m/028tv0
/m/016mhd	/award/award_winning_work/awards_won./award/award_honor/award_winner	/m/016nff
/m/028tv0	/music/performance_role/regular_performances./music/group_membership/group	/m/01jcxwp
/m/0lbd9	/time/event/locations	/m/06c62
/m/02nx2k	/film/film/genre	/m/04xvh5
/m/05y5kf	/award/award_nominee/award_nominations./award/award_nomination/award_nominee	/m/0clvcx
/m/02v1m7	/award/award_category/winners./award/award_honor/award_winner	/m/027zz
/m/0343h	/film/director/film	/m/0hv8w
/m/0gk4g	/people/cause_of_death/people	/m/01ycfv
/m/02l6dy	/award/award_nominee/award_nominations./award/award_nomination/award_nominee	/m/02w29z
/m/05jyb2	/tv/tv_program/regular_cast./tv/regular_tv_appearance/actor	/m/02t_zq
/m/03zg2x	/award/award_nominee/award_nominations./award/award_nomination/award_nominee	/m/02qgqt
/m/0bj25	/award/award_winning_work/awards_won./award/award_honor/award_winner	/m/016tt2
/m/01trf3	/award/award_nominee/award_nominations./award/award_nomination/award	/m/0bfvd4
/m/02w64f	/soccer/football_team/current_roster./sports/sports_team_roster/position	/m/0dgrmp
/m/0661ql3	/film/film/film_format	/m/017fx5
/m/01ngn3	/location/location/adjoin_s./location/adjoining_relationship/adjoins	/m/015m08
/m/01385g	/people/person/gender	/m/05zppz
/m/0gl6x	/education/educational_institution/students_graduates./education/education/major_field_of_study	/m/01lj9
/m/0dgrmp	/sports/sports_position/players./sports/sports_team_roster/team	/m/03mg5f
/m/040njc	/award/award_category/nominees./award/award_nomination/nominated_for	/m/0bj25
/m/03nnm4t	/award/award_ceremony/awards_presented./award/award_honor/honored_for	/m/03ln8b
/m/01vdm0	/music/performance_role/track_performances./music/track_contribution/role	/m/06w87
/m/03t5b6	/award/award_category/winners./award/award_honor/award_winner	/m/01vw20h
/m/02q_4ph	/film/film/language	/m/02h40lc
/m/040njc	/award/award_category/winners./award/award_honor/award_winner	/m/02hh8j
/m/01vrlr4	/people/person/spouse_s./people/marriage/type_of_union	/m/04ztj
/m/0gtvpkw	/film/film/release_date_s./film/film_regional_release_date/film_release_region	/m/0154j
/m/048vhl	/film/film/other_crew./film/film_crew_gig/film_crew_role	/m/09vw2b7
/m/016ywb	/film/film/language	/m/02h40lc
/m/0382m4	/award/award_nominee/award_nominations./award/award_nomination/award_nominee	/m/03_l8m
/m/04xfb	/influence/influence_node/influenced_by	/m/037jz
/m/0bpm4yw	/film/film/release_date_s./film/film_regional_release_date/film_release_region	/m/0d0vqn
/m/0mkg	/music/performance_role/regular_performances./music/group_membership/role	/m/01vdm0
/m/01j6t0	/medicine/symptom/symptom_of	/m/07jwr
/m/01713c	/award/award_winner/awards_won./award/award_honor/award_winner	/m/01kwsg
/m/0gj96ln	/film/film/release_date_s./film/film_regional_release_date/film_release_region	/m/0154j
/m/0fq7dv_	/film/film/genre	/m/01585b
/m/036hf4	/award/award_nominee/award_nominations./award/award_nomination/award_nominee	/m/03h_9lg
/m/0cp0ph6	/film/film/other_crew./film/film_crew_gig/film_crew_role	/m/0ch6mp2
/m/040njc	/award/award_category/nominees./award/award_nomination/nominated_for	/m/063hp4
/m/0c3ybss	/film/film/language	/m/02h40lc
/m/05g8pg	/film/film/film_format	/m/07fb8_
/m/02lnhv	/people/person/nationality	/m/0d05w3
/m/01l1sq	/people/person/profession	/m/039v1
/m/0cj2w	/people/deceased_person/place_of_death	/m/0h6l4
/m/03nkts	/people/person/spouse_s./people/marriage/type_of_union	/m/04ztj
/m/083chw	/award/award_winner/awards_won./award/award_honor/award_winner	/m/03_l8m
/m/0gkd1	/music/performance_role/track_performances./music/track_contribution/role	/m/01rhl
/m/03v3xp	/award/award_winner/awards_won./award/award_honor/award_winner	/m/065jlv
/m/06b_0	/award/award_nominee/award_nominations./award/award_nomination/nominated_for	/m/07jqjx
/m/0hsmh	/film/director/film	/m/0cq7tx
/m/04t36	/media_common/netflix_genre/titles	/m/0cq7tx
/m/0dgrmp	/sports/sports_position/players./sports/sports_team_roster/team	/m/07sqnh
/m/01gkgk	/government/government_office_category/officeholders./government/government_position_held/jurisdiction_of_office	/m/0f8l9c
/m/0d1tm	/olympics/olympic_sport/athletes./olympics/olympic_athlete_affiliation/olympics	/m/0jhn7
/m/01gt99	/government/legislative_session/members./government/government_position_held/district_represented	/m/05k7sb
/m/02nx2k	/film/film/genre	/m/02n4kr
/m/0fz2y7	/time/event/instance_of_recurring_event	/m/0g_w
/m/05k7sb	/location/location/adjoin_s./location/adjoining_relationship/adjoins	/m/059f4
/m/0ndwt2w	/film/film/other_crew./film/film_crew_gig/film_crew_role	/m/0ch6mp2
/m/040b5k	/film/film/release_date_s./film/film_regional_release_date/film_release_region	/m/03rk0
/m/03mcwq3	/award/award_nominee/award_nominations./award/award_nomination/award_nominee	/m/05fnl9
/m/0x67	/people/ethnicity/people	/m/06g2d1
/m/01l2m3	/people/cause_of_death/people	/m/0j3v
/m/07q1v4	/award/award_nominee/award_nominations./award/award_nomination/award	/m/054krc
/m/03h_9lg	/base/popstra/celebrity/friendship./base/popstra/friendship/participant	/m/0prfz
/m/06z6r	/olympics/olympic_sport/athletes./olympics/olympic_athlete_affiliation/country	/m/04wgh
/m/0gps0z	/people/person/profession	/m/0n1h
/m/06t74h	/award/award_nominee/award_nominations./award/award_nomination/award_nominee	/m/0227tr
/m/09v9mks	/film/film/release_date_s./film/film_regional_release_date/film_release_region	/m/0jgd
/m/02p65p	/award/award_nominee/award_nominations./award/award_nomination/award_nominee	/m/0crvfq
/m/041h0	/people/person/spouse_s./people/marriage/type_of_union	/m/04ztj
/m/086sj	/award/award_nominee/award_nominations./award/award_nomination/award	/m/09sb52
/m/0fqz6	/people/ethnicity/languages_spoken	/m/064_8sq
/m/07brj	/music/performance_role/regular_performances./music/group_membership/role	/m/01xqw
/m/01vdm0	/music/performance_role/track_performances./music/track_contribution/role	/m/0l15bq
/m/040njc	/award/award_category/nominees./award/award_nomination/nominated_for	/m/04vr_f
/m/0jym0	/film/film/genre	/m/07s9rl0
/m/03wy70	/film/actor/dubbing_performances./film/dubbing_performance/language	/m/02h40lc
/m/02ccqg	/education/educational_institution/students_graduates./education/education/student	/m/042kg
/m/0jsqk	/film/film/language	/m/064_8sq
/m/0m313	/award/award_winning_work/awards_won./award/award_honor/award	/m/040njc
/m/0b76d_m	/film/film/language	/m/02h40lc
/m/0x67	/people/ethnicity/people	/m/0gbwp
/m/02lg3y	/people/person/religion	/m/0c8wxp
/m/063g7l	/people/person/place_of_birth	/m/0m2rv
/m/02gkxp	/education/educational_institution/students_graduates./education/education/major_field_of_study	/m/02h40lc
/m/01qbl	/music/performance_role/track_performances./music/track_contribution/role	/m/03qlv7
/m/0g8st4	/award/award_nominee/award_nominations./award/award_nomination/award	/m/09sb52
/m/04v09	/olympics/olympic_participating_country/athletes./olympics/olympic_athlete_affiliation/olympics	/m/06sks6
/m/0crx5w	/award/award_nominee/award_nominations./award/award_nomination/award_nominee	/m/0b1f49
/m/03nnm4t	/award/award_ceremony/awards_presented./award/award_honor/award_winner	/m/05fnl9
/m/0dgrmp	/sports/sports_position/players./sports/sports_team_roster/team	/m/0520y3
/m/01vvyc_	/award/award_nominee/award_nominations./award/award_nomination/award_nominee	/m/01vvydl
/m/05g8pg	/film/film/language	/m/02h40lc
/m/019pm_	/award/award_nominee/award_nominations./award/award_nomination/award_nominee	/m/08swgx
/m/01p4vl	/people/person/profession	/m/0dxtg
/m/0kp2_	/influence/influence_node/influenced_by	/m/02lt8
/m/02psqkz	/military/military_combatant/military_conflicts./military/military_combatant_group/combatants	/m/06c1y
/m/0bzm__	/award/award_ceremony/awards_presented./award/award_honor/honored_for	/m/043n1r5
/m/02yplc	/people/person/spouse_s./people/marriage/type_of_union	/m/04ztj
/m/09p0ct	/award/award_winning_work/awards_won./award/award_honor/award	/m/02qyntr
/m/01vvydl	/music/artist/track_contributions./music/track_contribution/role	/m/01vdm0
/m/015t56	/film/actor/film./film/performance/film	/m/0ndwt2w
/m/01j6t0	/medicine/symptom/symptom_of	/m/0gk4g
/m/01hqhm	/film/film/executive_produced_by	/m/04q5zw
/m/0154qm	/award/award_nominee/award_nominations./award/award_nomination/award_nominee	/m/0blbxk
/m/030hbp	/base/popstra/celebrity/dated./base/popstra/dated/participant	/m/030hcs
/m/05zvq6g	/award/award_category/nominees./award/award_nomination/nominated_for	/m/016mhd
/m/02gyl0	/award/award_nominee/award_nominations./award/award_nomination/award	/m/09lvl1
/m/027_sn	/people/person/gender	/m/05zppz
/m/0d06m5	/people/person/spouse_s./people/marriage/spouse	/m/0157m
/m/09v6gc9	/tv/tv_writer/tv_programs./tv/tv_program_writer_relationship/tv_program	/m/0h3mh3q
/m/020_95	/award/award_nominee/award_nominations./award/award_nomination/award	/m/09sb52
/m/0bs1g5r	/people/person/gender	/m/05zppz
/m/029ghl	/people/person/spouse_s./people/marriage/type_of_union	/m/04ztj
/m/0164y7	/people/person/gender	/m/05zppz
/m/018mxj	/base/schemastaging/organization_extra/phone_number./base/schemastaging/phone_sandbox/service_language	/m/02h40lc
/m/048q6x	/people/person/spouse_s./people/marriage/type_of_union	/m/04ztj
/m/0gl02yg	/film/film/language	/m/012w70
/m/01w3v	/education/educational_institution/students_graduates./education/education/major_field_of_study	/m/02h40lc
/m/017yxq	/people/person/gender	/m/05zppz
/m/0bs5k8r	/film/film/genre	/m/07s9rl0
/m/018ljb	/user/jg/default_domain/olympic_games/sports	/m/06z6r
/m/07hwkr	/people/ethnicity/people	/m/016vg8
/m/051zy_b	/film/film/featured_film_locations	/m/0r2kh
/m/040njc	/award/award_category/nominees./award/award_nomination/nominated_for	/m/01242_
/m/03vrv9	/sports/pro_athlete/teams./sports/sports_team_roster/team	/m/0487_
/m/03qlv7	/music/performance_role/track_performances./music/track_contribution/role	/m/023r2x
/m/0ccd3x	/film/film/produced_by	/m/0hsmh
/m/06bd5j	/film/film/film_format	/m/07fb8_
/m/03q43g	/award/award_nominee/award_nominations./award/award_nomination/award	/m/09qvc0
/m/09tkzy	/film/film/language	/m/02h40lc
/m/0gqz2	/award/award_category/winners./award/award_honor/award_winner	/m/02lz1s
/m/0djtky	/people/person/gender	/m/05zppz
/m/02ccqg	/education/educational_institution/students_graduates./education/education/student	/m/04wp2p
/m/05q_mg	/people/person/profession	/m/0np9r
/m/01pcdn	/people/person/places_lived./people/place_lived/location	/m/06yxd
/m/016z7s	/film/film/music	/m/03bxh
/m/0c2tf	/people/person/spouse_s./people/marriage/type_of_union	/m/04ztj
/m/07lnk	/music/genre/artists	/m/01v_pj6
/m/06c1y	/organization/organization_member/member_of./organization/organization_membership/organization	/m/01rz1
/m/01q4qv	/people/person/nationality	/m/0f8l9c
/m/02s6sh	/people/person/places_lived./people/place_lived/location	/m/01zmqw
/m/0clz7	/location/location/adjoin_s./location/adjoining_relationship/adjoins	/m/0m_w6
/m/031zkw	/people/person/spouse_s./people/marriage/type_of_union	/m/04ztj
/m/04kxsb	/award/award_category/winners./award/award_honor/award_winner	/m/0p_pd
/m/02h4rq6	/education/educational_degree/people_with_this_degree./education/education/major_field_of_study	/m/0193x
/m/0c2tf	/people/deceased_person/place_of_death	/m/0k049
/m/03q2t9	/people/person/profession	/m/016z4k
/m/04ztj	/people/marriage_union_type/unions_of_this_type./people/marriage/location_of_ceremony	/m/06kx2
/m/086sj	/base/popstra/celebrity/breakup./base/popstra/breakup/participant	/m/01n5309
/m/09sdmz	/award/award_category/winners./award/award_honor/ceremony	/m/09qvms
/m/06z6r	/olympics/olympic_sport/athletes./olympics/olympic_athlete_affiliation/country	/m/06m_5
/m/0fby2t	/award/award_nominee/award_nominations./award/award_nomination/nominated_for	/m/0bq8tmw
/m/01kff7	/film/film/other_crew./film/film_crew_gig/film_crew_role	/m/0ch6mp2
/m/06szd3	/award/hall_of_fame/inductees./award/hall_of_fame_induction/inductee	/m/07jrjb
/m/0myk8	/music/performance_role/track_performances./music/track_contribution/role	/m/0l14qv
/m/01hmb_	/film/actor/film./film/performance/film	/m/03wj4r8
/m/07r4c	/music/artist/contribution./music/recording_contribution/performance_role	/m/0l14qv
/m/0jhn7	/user/jg/default_domain/olympic_games/sports	/m/07jbh
/m/0hv8w	/film/film/release_date_s./film/film_regional_release_date/film_release_region	/m/0f8l9c
/m/0283ph	/tv/tv_program/languages	/m/02h40lc
/m/02x258x	/award/award_category/nominees./award/award_nomination/nominated_for	/m/0prh7
/m/0gv5c	/people/person/languages	/m/02h40lc
/m/0q9t7	/people/person/languages	/m/02h40lc
/m/05c26ss	/film/film/release_date_s./film/film_regional_release_date/film_release_region	/m/0d0vqn
/m/02rdxsh	/award/award_category/nominees./award/award_nomination/nominated_for	/m/0hvvf
/m/0kbg6	/people/person/languages	/m/02h40lc
/m/04rqd	/broadcast/content/artist	/m/01vw26l
/m/01vqrm	/people/person/profession	/m/0dxtg
/m/0czp_	/award/award_category/nominees./award/award_nomination/nominated_for	/m/0k419
/m/01gsry	/government/legislative_session/members./government/government_position_held/legislative_sessions	/m/01gssm
/m/01gp_x	/influence/influence_node/influenced_by	/m/06d6y
/m/04cl1	/film/actor/film./film/performance/film	/m/01xdxy
/m/03yvf2	/film/film/release_date_s./film/film_regional_release_date/film_release_region	/m/0jgd
/m/011yhm	/film/film/edited_by	/m/02kxbwx
/m/01pfkw	/people/person/employment_history./business/employment_tenure/company	/m/01q940
/m/01hcj2	/base/popstra/celebrity/friendship./base/popstra/friendship/participant	/m/0bqs56
/m/02y21l	/music/record_label/artist	/m/04mx7s
/m/0dq3c	/business/job_title/people_with_this_title./business/employment_tenure/company	/m/01pf21
/m/0h1cdwq	/film/film/release_date_s./film/film_regional_release_date/film_release_region	/m/0154j
/m/014mlp	/education/educational_degree/people_with_this_degree./education/education/major_field_of_study	/m/02h40lc
/m/0c53vt	/award/award_ceremony/awards_presented./award/award_honor/award_winner	/m/0171lb
/m/0d3qd0	/people/person/spouse_s./people/marriage/type_of_union	/m/04ztj
/m/06cv1	/people/person/profession	/m/0dxtg
/m/0hsmh	/award/award_winner/awards_won./award/award_honor/award_winner	/m/012vby
/m/064r97z	/award/award_winning_work/awards_won./award/award_honor/award_winner	/m/0hsn_
/m/0gv5c	/people/person/spouse_s./people/marriage/type_of_union	/m/04ztj
/m/021yw7	/people/person/profession	/m/0dxtg
/m/03rk0	/location/location/contains	/m/02z6fs
/m/02hkv5	/people/person/nationality	/m/03rk0
/m/0gtvpkw	/film/film/release_date_s./film/film_regional_release_date/film_release_region	/m/06t2t
/m/01hqhm	/award/award_winning_work/awards_won./award/award_honor/award_winner	/m/02qgqt
/m/01ycfv	/music/artist/track_contributions./music/track_contribution/role	/m/01vdm0
/m/021yw7	/award/award_nominee/award_nominations./award/award_nomination/award	/m/0c422z4
/m/016ywb	/film/film/genre	/m/07s9rl0
/m/05h43ls	/film/film/other_crew./film/film_crew_gig/film_crew_role	/m/09vw2b7
/m/0633p0	/award/award_nominee/award_nominations./award/award_nomination/nominated_for	/m/03ntbmw
/m/01679d	/music/performance_role/track_performances./music/track_contribution/role	/m/07brj
/m/03ntbmw	/film/film/other_crew./film/film_crew_gig/film_crew_role	/m/0ch6mp2
/m/08vk_r	/soccer/football_team/current_roster./sports/sports_team_roster/position	/m/0dgrmp
/m/02g5q1	/film/film/language	/m/02h40lc
/m/0319l	/music/performance_role/regular_performances./music/group_membership/group	/m/02vgh
/m/029cpw	/people/person/place_of_birth	/m/019fh
/m/0nryt	/location/location/contains	/m/0t0n5
/m/01v0fn1	/people/person/gender	/m/05zppz
/m/0dgrmp	/sports/sports_position/players./sports/sports_team_roster/team	/m/090q8l
/m/05y5kf	/award/award_nominee/award_nominations./award/award_nomination/nominated_for	/m/0194zl
/m/047gpsd	/film/film/genre	/m/07s9rl0
/m/01hww_	/music/performance_role/regular_performances./music/group_membership/group	/m/07m4c
/m/02p65p	/award/award_nominee/award_nominations./award/award_nomination/nominated_for	/m/05qbckf
/m/01p3ty	/film/film/produced_by	/m/03fw4y
/m/02f716	/award/award_category/winners./award/award_honor/award_winner	/m/01v_pj6
/m/0d05w3	/location/location/contains	/m/0jk_8
/m/048q6x	/award/award_winner/awards_won./award/award_honor/award_winner	/m/027n4zv
/m/02qgyv	/people/person/spouse_s./people/marriage/type_of_union	/m/04ztj
/m/039bpc	/people/person/languages	/m/02h40lc
/m/02b0_m	/soccer/football_team/current_roster./soccer/football_roster_position/position	/m/03f0fp
/m/02_xgp2	/education/educational_degree/people_with_this_degree./education/education/institution	/m/0cwx_
/m/01v3vp	/film/actor/film./film/performance/film	/m/0241y7
/m/04g9gd	/film/film/other_crew./film/film_crew_gig/film_crew_role	/m/0ch6mp2
/m/064r97z	/film/film/genre	/m/03bxz7
/m/030hbp	/award/award_nominee/award_nominations./award/award_nomination/award	/m/09qj50
/m/0b4rf3	/people/person/profession	/m/0dxtg
/m/043djx	/government/legislative_session/members./government/government_position_held/district_represented	/m/05k7sb
/m/0kb1g	/film/film/language	/m/02h40lc
/m/02ktt7	/award/ranked_item/appears_in_ranked_lists./award/ranking/list	/m/01pd60
/m/05jyb2	/tv/tv_program/genre	/m/07s9rl0
/m/0mkg	/music/instrument/instrumentalists	/m/01l4g5
/m/0645k5	/film/film/genre	/m/026ny
/m/0gs96	/award/award_category/nominees./award/award_nomination/nominated_for	/m/0m313
/m/06s7rd	/base/popstra/celebrity/dated./base/popstra/dated/participant	/m/02ts3h
/m/06d6y	/people/person/nationality	/m/05b4w
/m/01n_g9	/education/educational_institution/students_graduates./education/education/student	/m/0f_y9
/m/011yg9	/film/film/genre	/m/02l7c8
/m/018swb	/people/person/languages	/m/02h40lc
/m/03dj6y	/soccer/football_team/current_roster./sports/sports_team_roster/position	/m/0dgrmp
/m/01wj18h	/award/award_nominee/award_nominations./award/award_nomination/award_nominee	/m/0cc5tgk
/m/01ycfv	/award/award_nominee/award_nominations./award/award_nomination/award	/m/054krc
/m/03fbb6	/people/person/languages	/m/02h40lc
/m/0b13yt	/sports/sports_position/players./sports/sports_team_roster/team	/m/01xvb
/m/0bq8tmw	/film/film/story_by	/m/0fby2t
/m/03hy3g	/award/award_nominee/award_nominations./award/award_nomination/award	/m/040njc
/m/0227tr	/people/person/languages	/m/02h40lc
/m/0807ml	/people/person/gender	/m/05zppz
/m/02vtnf	/film/director/film	/m/0gcrg
/m/011wtv	/film/film/film_format	/m/07fb8_
/m/03k7bd	/people/person/employment_history./business/employment_tenure/company	/m/07wh1
/m/0b6k___	/award/award_category/winners./award/award_honor/award_winner	/m/08hhm6
/m/027pfg	/film/film/release_date_s./film/film_regional_release_date/film_release_region	/m/06t2t
/m/030znt	/award/award_nominee/award_nominations./award/award_nomination/award	/m/09sb52
/m/0b76d_m	/film/film/genre	/m/07s9rl0
/m/0c_j9x	/film/film/cinematography	/m/06qn87
/m/0755wz	/award/award_winner/awards_won./award/award_honor/award_winner	/m/02l4pj
/m/0377k9	/government/government_office_category/officeholders./government/government_position_held/jurisdiction_of_office	/m/0d0vqn
/m/06z6r	/olympics/olympic_sport/athletes./olympics/olympic_athlete_affiliation/olympics	/m/0sxrz
/m/027ct7c	/film/film/genre	/m/07s9rl0
/m/0hsmh	/film/director/film	/m/0ccd3x
/m/03bpn6	/people/person/spouse_s./people/marriage/type_of_union	/m/04ztj
/m/021p26	/soccer/football_team/current_roster./soccer/football_roster_position/position	/m/0dgrmp
/m/01q940	/music/record_label/artist	/m/01t8399
/m/06b_0	/people/person/place_of_birth	/m/05qtj
/m/028kb	/base/localfood/seasonal_month/produce_available./base/localfood/produce_availability/seasonal_months	/m/02xx5
/m/0qmk5	/tv/tv_program/languages	/m/02h40lc
/m/026zvx7	/people/person/languages	/m/02h40lc
/m/0q9b0	/film/film/genre	/m/03bxz7
/m/01679d	/music/performance_role/regular_performances./music/group_membership/role	/m/0l15bq
/m/040b5k	/film/film/release_date_s./film/film_regional_release_date/film_release_region	/m/0f8l9c
/m/09lhln	/people/person/gender	/m/05zppz
/m/0hv8w	/award/award_winning_work/awards_won./award/award_honor/award_winner	/m/0343h
/m/026p_bs	/film/film/language	/m/064_8sq
/m/09qj50	/award/award_category/winners./award/award_honor/award_winner	/m/0m66w
/m/0141kz	/film/actor/film./film/performance/film	/m/0prh7
/m/01kymm	/people/person/profession	/m/016z4k
/m/07s9rl0	/media_common/netflix_genre/titles	/m/08sfxj
/m/04rg6	/people/person/gender	/m/05zppz
/m/02r8hh_	/film/film/release_date_s./film/film_regional_release_date/film_release_region	/m/06c1y
/m/05kh_	/people/person/spouse_s./people/marriage/type_of_union	/m/04ztj
/m/0cfhfz	/film/film/genre	/m/07s9rl0
/m/0xnvg	/people/ethnicity/people	/m/01h910
/m/016nff	/award/award_nominee/award_nominations./award/award_nomination/award	/m/05zvq6g
/m/03h26tm	/award/award_nominee/award_nominations./award/award_nomination/award_nominee	/m/09pjnd
/m/0171lb	/people/person/spouse_s./people/marriage/type_of_union	/m/04ztj
/m/0fpj9pm	/base/popstra/celebrity/friendship./base/popstra/friendship/participant	/m/060j8b
/m/07lnk	/music/genre/parent_genre	/m/0fd3y
/m/028tv0	/music/performance_role/regular_performances./music/group_membership/group	/m/0143q0
/m/03zqc1	/award/award_nominee/award_nominations./award/award_nomination/award	/m/09qwmm
/m/0dfw0	/film/film/story_by	/m/0343h
/m/01rgr	/people/person/religion	/m/0c8wxp
/m/01g42	/award/award_nominee/award_nominations./award/award_nomination/award	/m/04kxsb
/m/0gls4q_	/people/person/place_of_birth	/m/01sn3
/m/058kqy	/award/award_winner/awards_won./award/award_honor/award_winner	/m/0336mc
/m/0cp0ph6	/film/film/language	/m/02h40lc
/m/02k_kn	/music/genre/artists	/m/063t3j
/m/01vzx45	/award/award_nominee/award_nominations./award/award_nomination/award	/m/03t5b6
/m/027pfg	/film/film/other_crew./film/film_crew_gig/film_crew_role	/m/0ch6mp2
/m/05qbckf	/film/film/other_crew./film/film_crew_gig/film_crew_role	/m/0ch6mp2
/m/0280mv7	/people/person/gender	/m/05zppz
/m/076xkps	/film/film/other_crew./film/film_crew_gig/film_crew_role	/m/09vw2b7
/m/01y665	/award/award_nominee/award_nominations./award/award_nomination/award_nominee	/m/05mkhs
/m/07q1v4	/music/artist/track_contributions./music/track_contribution/role	/m/0319l
/m/0nh57	/location/location/adjoin_s./location/adjoining_relationship/adjoins	/m/0nhmw
/m/048scx	/film/film/other_crew./film/film_crew_gig/film_crew_role	/m/01pvkk
/m/0x67	/people/ethnicity/people	/m/06s7rd
/m/09rp4r_	/award/award_nominee/award_nominations./award/award_nomination/nominated_for	/m/0sxgv
/m/0319l	/music/performance_role/track_performances./music/track_contribution/role	/m/023r2x
/m/0cj36c	/award/award_nominee/award_nominations./award/award_nomination/award_nominee	/m/08hsww
/m/0fpj9pm	/people/person/spouse_s./people/marriage/type_of_union	/m/04ztj
/m/04w391	/award/award_nominee/award_nominations./award/award_nomination/award	/m/05p09zm
/m/02qgyv	/award/award_nominee/award_nominations./award/award_nomination/award_nominee	/m/01kwsg
/m/0b_fw	/people/person/gender	/m/05zppz
/m/05p09zm	/award/award_category/nominees./award/award_nomination/nominated_for	/m/06bd5j
/m/045zr	/people/person/spouse_s./people/marriage/spouse	/m/02qtywd
/m/0tc7	/people/person/gender	/m/05zppz
/m/0chgzm	/travel/travel_destination/climate./travel/travel_destination_monthly_climate/month	/m/028kb
/m/02h4rq6	/education/educational_degree/people_with_this_degree./education/education/institution	/m/07tds
/m/027n4zv	/award/award_nominee/award_nominations./award/award_nomination/award_nominee	/m/048q6x
/m/0557q	/education/field_of_study/students_majoring./education/education/student	/m/0gps0z
/m/03ffcz	/film/film/language	/m/02h40lc
/m/099bhp	/film/film/language	/m/02h40lc
/m/019_1h	/film/actor/film./film/performance/film	/m/04cbbz
/m/02mt4k	/people/person/spouse_s./people/marriage/type_of_union	/m/04ztj
/m/0gtvpkw	/film/film/other_crew./film/film_crew_gig/film_crew_role	/m/09vw2b7
/m/0gvx_	/award/award_category/winners./award/award_honor/ceremony	/m/073hmq
/m/02qyntr	/award/award_category/nominees./award/award_nomination/nominated_for	/m/011yph
/m/0gls4q_	/award/award_nominee/award_nominations./award/award_nomination/award_nominee	/m/0fxky3
/m/0q9t7	/people/person/gender	/m/05zppz
/m/02bjhv	/education/educational_institution/students_graduates./education/education/major_field_of_study	/m/0g26h
/m/0262zm	/award/award_category/winners./award/award_honor/award_winner	/m/03772
/m/023r2x	/music/performance_role/track_performances./music/track_contribution/role	/m/0l15f_
/m/058vfp4	/people/person/profession	/m/089fss
/m/063hp4	/film/film/cinematography	/m/02rybfn
/m/0d1tm	/olympics/olympic_sport/athletes./olympics/olympic_athlete_affiliation/olympics	/m/06sks6
/m/02vl9ln	/award/award_category/winners./award/award_honor/award_winner	/m/01q4qv
/m/0l14md	/music/performance_role/regular_performances./music/group_membership/group	/m/07rnh
/m/0g9yrw	/film/film/production_companies	/m/0kx4m
/m/0d05w3	/location/location/contains	/m/0qb0j
/m/06m6z6	/film/director/film	/m/040_lv
/m/03wj4r8	/film/film/genre	/m/07s9rl0
/m/02ywhz	/award/award_ceremony/awards_presented./award/award_honor/award_winner	/m/0b6mgp_
/m/0gtvpkw	/film/film/release_date_s./film/film_regional_release_date/film_release_region	/m/04gzd
/m/023r2x	/music/performance_role/track_performances./music/track_contribution/role	/m/03qlv7
/m/01rgr	/people/person/nationality	/m/0f8l9c
/m/04rwx	/education/educational_institution/students_graduates./education/education/major_field_of_study	/m/01lj9
/m/0lbd9	/user/jg/default_domain/olympic_games/sports	/m/0d1tm
/m/011_6p	/music/performance_role/regular_performances./music/group_membership/role	/m/0myk8
/m/0b13yt	/sports/sports_position/players./sports/sports_team_roster/team	/m/05g3b
/m/014mlp	/education/educational_degree/people_with_this_degree./education/education/student	/m/0sx5w
/m/05fgt1	/film/film/music	/m/03h610
/m/0hw1j	/people/person/profession	/m/0dxtg
/m/01p7yb	/award/award_nominee/award_nominations./award/award_nomination/award	/m/09sb52
/m/0gkz15s	/film/film/release_date_s./film/film_regional_release_date/film_release_region	/m/0d05w3
/m/03cs_xw	/award/award_nominee/award_nominations./award/award_nomination/award_nominee	/m/03cs_z7
/m/0l14md	/music/performance_role/track_performances./music/track_contribution/role	/m/014zz1
/m/027zz	/film/director/film	/m/026p4q7
/m/019fz	/influence/influence_node/influenced_by	/m/026lj
/m/04m2zj	/music/artist/contribution./music/recording_contribution/performance_role	/m/0l14qv
/m/06t2t	/travel/travel_destination/climate./travel/travel_destination_monthly_climate/month	/m/04wzr
/m/0d8cr0	/people/person/gender	/m/05zppz
/m/016ks5	/award/award_winning_work/awards_won./award/award_honor/award	/m/09cm54
/m/063hp4	/film/film/genre	/m/04t36
/m/0fv89q	/award/award_ceremony/awards_presented./award/award_honor/award_winner	/m/040z9
/m/036jb	/film/director/film	/m/063hp4
/m/07s9rl0	/media_common/netflix_genre/titles	/m/03ntbmw
/m/02ck7w	/award/award_nominee/award_nominations./award/award_nomination/award_nominee	/m/09wj5
/m/03gvt	/music/instrument/instrumentalists	/m/07r4c
/m/0194zl	/film/film/genre	/m/07s9rl0
/m/02g87m	/people/person/religion	/m/0c8wxp
/m/01w58n3	/people/person/spouse_s./people/marriage/type_of_union	/m/04ztj
/m/0262x6	/award/award_category/winners./award/award_honor/award_winner	/m/01zkxv
/m/0h3mh3q	/tv/tv_program/regular_cast./tv/regular_tv_appearance/actor	/m/0hsn_
/m/070j61	/award/award_nominee/award_nominations./award/award_nomination/nominated_for	/m/0l76z
/m/06yxd	/location/location/contains	/m/057wlm
/m/0431v3	/award/award_winning_work/awards_won./award/award_honor/award_winner	/m/030hbp
/m/0kbf1	/film/film/release_date_s./film/film_regional_release_date/film_release_region	/m/0h7x
/m/028tv0	/music/performance_role/regular_performances./music/group_membership/role	/m/01qbl
/m/0xnvg	/people/ethnicity/people	/m/04sry
/m/0gs96	/award/award_category/winners./award/award_honor/ceremony	/m/02ywhz
/m/086sj	/award/award_nominee/award_nominations./award/award_nomination/award	/m/02x4x18
/m/03gvt	/music/instrument/instrumentalists	/m/01k47c
/m/07sqnh	/soccer/football_team/current_roster./soccer/football_roster_position/position	/m/0dgrmp
/m/0g701n	/soccer/football_team/current_roster./soccer/football_roster_position/position	/m/0dgrmp
/m/019n8z	/user/jg/default_domain/olympic_games/sports	/m/09f6b
/m/048tv9	/film/film/film_format	/m/07fb8_
/m/063hp4	/award/award_winning_work/awards_won./award/award_honor/award_winner	/m/01vrlqd
/m/02mjs7	/education/educational_degree/people_with_this_degree./education/education/institution	/m/01n951
/m/02h4rq6	/education/educational_degree/people_with_this_degree./education/education/major_field_of_study	/m/01lj9
/m/02cw8s	/education/educational_institution/students_graduates./education/education/student	/m/0c9d9
/m/01vqrm	/people/person/gender	/m/05zppz
/m/0bzjvm	/time/event/instance_of_recurring_event	/m/0g_w
/m/0l76z	/award/award_winning_work/awards_won./award/award_honor/award_winner	/m/0m66w
/m/0gq6s3	/award/award_category/nominees./award/award_nomination/nominated_for	/m/06823p
/m/02p65p	/award/award_nominee/award_nominations./award/award_nomination/award_nominee	/m/05yh_t
/m/03f1r6t	/people/person/spouse_s./people/marriage/type_of_union	/m/04ztj
/m/0241y7	/award/award_winning_work/awards_won./award/award_honor/award_winner	/m/02cx72
/m/02h4rq6	/education/educational_degree/people_with_this_degree./education/education/institution	/m/01w3v
/m/02rff2	/education/educational_institution/students_graduates./education/education/student	/m/0157m
/m/06w58f	/award/award_nominee/award_nominations./award/award_nomination/award_nominee	/m/02wk_43
/m/01pcj4	/education/educational_institution/students_graduates./education/education/student	/m/01fxfk
/m/04f9r2	/people/deceased_person/place_of_death	/m/06_kh
/m/07cn2c	/people/person/profession	/m/0dxtg
/m/03rwz3	/organization/organization/child./organization/organization_relationship/child	/m/030_1m
/m/026p4q7	/film/film/other_crew./film/film_crew_gig/film_crew_role	/m/0ch6mp2
/m/04g5k	/olympics/olympic_participating_country/medals_won./olympics/olympic_medal_honor/olympics	/m/06sks6
/m/0289q	/sports/professional_sports_team/draft_picks./sports/sports_league_draft_pick/draft	/m/09l0x9
/m/0c5dd	/award/award_winning_work/awards_won./award/award_honor/award_winner	/m/0bkmf
/m/05cx7x	/film/actor/film./film/performance/film	/m/03xf_m
/m/05mkhs	/film/actor/film./film/performance/film	/m/027gy0k
/m/02l9wl	/education/educational_institution/students_graduates./education/education/student	/m/01k47c
/m/0d7vtk	/film/film/language	/m/02h40lc
/m/05sy_5	/award/award_winning_work/awards_won./award/award_honor/award	/m/09sb52
/m/09prnq	/people/person/spouse_s./people/marriage/type_of_union	/m/04ztj
/m/05b4w	/olympics/olympic_participating_country/medals_won./olympics/olympic_medal_honor/olympics	/m/0sxrz
/m/02d003	/film/film/other_crew./film/film_crew_gig/film_crew_role	/m/01pvkk
/m/01ps2h8	/people/person/places_lived./people/place_lived/location	/m/07ylj
/m/0prfz	/award/award_nominee/award_nominations./award/award_nomination/award_nominee	/m/03h_9lg
/m/02645b	/award/award_nominee/award_nominations./award/award_nomination/award	/m/040njc
/m/0bz6l9	/time/event/instance_of_recurring_event	/m/0g_w
/m/06c1y	/olympics/olympic_participating_country/medals_won./olympics/olympic_medal_honor/olympics	/m/0lbd9
/m/02h40lc	/language/human_language/countries_spoken_in	/m/06m_5
/m/0dyb1	/film/film/release_date_s./film/film_regional_release_date/film_release_region	/m/0jgd
/m/014cw2	/people/person/gender	/m/05zppz
/m/048gd_	/soccer/football_team/current_roster./soccer/football_roster_position/position	/m/0dgrmp
/m/01lcxbb	/people/person/gender	/m/05zppz
/m/01pw2f1	/base/popstra/celebrity/canoodled./base/popstra/canoodled/participant	/m/0320jz
/m/03_6y	/people/person/gender	/m/05zppz
/m/01vvyc_	/base/popstra/celebrity/dated./base/popstra/dated/participant	/m/03h_0_z
/m/0ply0	/travel/travel_destination/climate./travel/travel_destination_monthly_climate/month	/m/028kb
/m/0399p	/people/person/place_of_birth	/m/05qtj
/m/018jz	/sports/sport/pro_athletes./sports/pro_sports_played/athlete	/m/040j2_
/m/0bq8tmw	/film/film/release_date_s./film/film_regional_release_date/film_release_region	/m/01crd5
/m/04ztj	/people/marriage_union_type/unions_of_this_type./people/marriage/location_of_ceremony	/m/0r2kh
/m/01sn3	/location/location/adjoin_s./location/adjoining_relationship/adjoins	/m/0yvjx
/m/01h6pn	/time/event/locations	/m/0f8l9c
/m/015t56	/award/award_winner/awards_won./award/award_honor/award_winner	/m/09wj5
/m/01gsrl	/government/legislative_session/members./government/government_position_held/district_represented	/m/06yxd
/m/0gj96ln	/film/film/release_date_s./film/film_regional_release_date/film_release_region	/m/04gzd
/m/016s0m	/people/person/profession	/m/016z4k
/m/0dzst	/education/educational_institution/students_graduates./education/education/student	/m/016lh0
/m/0k269	/people/person/spouse_s./people/marriage/type_of_union	/m/04ztj
/m/02qtywd	/music/artist/track_contributions./music/track_contribution/role	/m/01vdm0
/m/0277j40	/film/film/language	/m/02h40lc
/m/0l14md	/music/performance_role/regular_performances./music/group_membership/group	/m/02ht0ln
/m/03hfxx	/people/person/spouse_s./people/marriage/type_of_union	/m/04ztj
/m/0p_pd	/people/person/profession	/m/0dxtg
/m/01n5309	/base/popstra/celebrity/dated./base/popstra/dated/participant	/m/086sj
/m/01y9st	/education/university/domestic_tuition./measurement_unit/dated_money_value/currency	/m/0ptk_
/m/071zb	/base/biblioness/bibs_location/state	/m/03msf
/m/026v_78	/people/person/gender	/m/05zppz
/m/0t0n5	/location/hud_county_place/county	/m/0nryt
/m/05pdh86	/film/film/release_date_s./film/film_regional_release_date/film_release_region	/m/07ylj
/m/0pv2t	/film/film/film_production_design_by	/m/05b5_tj
/m/0prfz	/award/award_nominee/award_nominations./award/award_nomination/award_nominee	/m/01w9wwg
/m/01b9ck	/people/person/profession	/m/0dxtg
/m/01v1d8	/music/performance_role/track_performances./music/track_contribution/role	/m/0l14md
/m/02n4kr	/media_common/netflix_genre/titles	/m/06rmdr
/m/0cc5tgk	/award/award_winner/awards_won./award/award_honor/award_winner	/m/01wj18h
/m/09sb52	/award/award_category/winners./award/award_honor/award_winner	/m/09wj5
/m/024dw0	/music/artist/track_contributions./music/track_contribution/role	/m/01vdm0
/m/0379s	/people/person/nationality	/m/0f8l9c
/m/014v1q	/people/person/profession	/m/0np9r
/m/03sww	/award/award_nominee/award_nominations./award/award_nomination/award	/m/03t5b6
/m/02h4rq6	/education/educational_degree/people_with_this_degree./education/education/institution	/m/03l6bs
/m/012mzw	/education/educational_institution/students_graduates./education/education/student	/m/03f1r6t
/m/01jft4	/film/film/language	/m/02h40lc
/m/071pf2	/people/person/spouse_s./people/marriage/type_of_union	/m/04ztj
/m/0prfz	/award/award_nominee/award_nominations./award/award_nomination/award	/m/0789_m
/m/059dn	/user/ktrueman/default_domain/international_organization/member_states	/m/04g5k
/m/016tt2	/film/film_distributor/films_distributed./film/film_film_distributor_relationship/film	/m/01hw5kk
/m/01hww_	/music/performance_role/track_performances./music/track_contribution/role	/m/0mkg
/m/054krc	/award/award_category/nominees./award/award_nomination/nominated_for	/m/0cf08
/m/0645k5	/film/film/release_date_s./film/film_regional_release_date/film_release_region	/m/0154j
/m/0dgrmp	/sports/sports_position/players./sports/sports_team_roster/team	/m/0b_ljy
/m/0425gc	/soccer/football_team/current_roster./soccer/football_roster_position/position	/m/0dgrmp
/m/0d1tm	/olympics/olympic_sport/athletes./olympics/olympic_athlete_affiliation/country	/m/0154j
/m/016gkf	/award/award_nominee/award_nominations./award/award_nomination/award	/m/04kxsb
/m/07l8f	/baseball/baseball_team/team_stats./baseball/baseball_team_stats/season	/m/0285r5d
/m/05d7rk	/people/person/religion	/m/0flw86
/m/08fn5b	/film/film/genre	/m/07s9rl0
/m/05lb65	/people/person/spouse_s./people/marriage/type_of_union	/m/04ztj
/m/05q_mg	/people/person/gender	/m/05zppz
/m/03fbb6	/film/actor/film./film/performance/film	/m/0bth54
/m/071pf2	/sports/pro_athlete/teams./sports/sports_team_roster/team	/m/037css
/m/019pkm	/award/award_nominee/award_nominations./award/award_nomination/award_nominee	/m/05cqhl
/m/01_x6v	/people/person/places_lived./people/place_lived/location	/m/02cl1
/m/028p0	/people/person/gender	/m/05zppz
/m/0gq6s3	/award/award_category/nominees./award/award_nomination/nominated_for	/m/04nl83
/m/01679d	/music/performance_role/track_performances./music/track_contribution/role	/m/0l15bq
/m/0b4rf3	/award/award_nominee/award_nominations./award/award_nomination/award_nominee	/m/01pfkw
/m/01pbxb	/people/person/profession	/m/016z4k
/m/03xj05	/film/film/genre	/m/07s9rl0
/m/02gt5s	/location/location/contains	/m/0vrmb
/m/0d05w3	/olympics/olympic_participating_country/athletes./olympics/olympic_athlete_affiliation/olympics	/m/06sks6
/m/079vf	/people/person/profession	/m/0dxtg
/m/02hy9p	/people/person/spouse_s./people/marriage/type_of_union	/m/04ztj
/m/02rl201	/sports/sports_league_draft/picks./sports/sports_league_draft_pick/school	/m/01jsk6
/m/019pm_	/award/award_nominee/award_nominations./award/award_nomination/award	/m/05p09zm
/m/028tv0	/music/performance_role/regular_performances./music/group_membership/role	/m/0gkd1
/m/05c4fys	/people/person/gender	/m/05zppz
/m/048scx	/film/film/produced_by	/m/0127m7
/m/03nnm4t	/award/award_ceremony/awards_presented./award/award_honor/award_winner	/m/020_95
/m/0c3351	/media_common/netflix_genre/titles	/m/04ddm4
/m/055c8	/award/award_nominee/award_nominations./award/award_nomination/award_nominee	/m/0127m7
/m/05pdh86	/film/film/language	/m/02h40lc
/m/07c98	/location/location/contains	/m/019fbp
/m/037mh8	/people/person/gender	/m/05zppz
/m/02zmh5	/award/award_nominee/award_nominations./award/award_nomination/award	/m/01bgqh
/m/0l14md	/music/performance_role/regular_performances./music/group_membership/role	/m/0l14qv
/m/04yc76	/film/film/film_format	/m/07fb8_
/m/054krc	/award/award_category/nominees./award/award_nomination/nominated_for	/m/043n1r5
/m/045zr	/music/artist/track_contributions./music/track_contribution/role	/m/05kms
/m/0fthdk	/film/actor/dubbing_performances./film/dubbing_performance/language	/m/02h40lc
/m/05pdh86	/film/film/release_date_s./film/film_regional_release_date/film_release_region	/m/06qd3
/m/02_xgp2	/education/educational_degree/people_with_this_degree./education/education/major_field_of_study	/m/0cd78
/m/02t_zq	/people/person/gender	/m/05zppz
/m/06t74h	/award/award_nominee/award_nominations./award/award_nomination/award	/m/09sb52
/m/029cpw	/film/actor/film./film/performance/film	/m/0k54q
/m/04ztj	/people/marriage_union_type/unions_of_this_type./people/marriage/location_of_ceremony	/m/0f8l9c
/m/017jd9	/film/film/release_date_s./film/film_regional_release_date/film_release_region	/m/05b4w
/m/01xdf5	/award/award_nominee/award_nominations./award/award_nomination/award_nominee	/m/05pzdk
/m/02qyntr	/award/award_category/nominees./award/award_nomination/nominated_for	/m/0m9p3
/m/08cn4_	/people/person/profession	/m/0np9r
/m/07s9rl0	/media_common/netflix_genre/titles	/m/0sxmx
/m/06w7mlh	/tv/tv_program/languages	/m/02h40lc
/m/0b76d_m	/film/film/release_date_s./film/film_regional_release_date/film_release_region	/m/0f8l9c
/m/0gqz2	/award/award_category/winners./award/award_honor/ceremony	/m/0c6vcj
/m/01j7z7	/people/person/profession	/m/0dxtg
/m/05th8t	/people/person/spouse_s./people/marriage/type_of_union	/m/04ztj
/m/0fphgb	/film/film/release_date_s./film/film_regional_release_date/film_release_region	/m/0f8l9c
/m/027pfg	/film/film/release_date_s./film/film_regional_release_date/film_release_region	/m/03rk0
/m/0gk4g	/people/cause_of_death/people	/m/052h3
/m/04ztj	/people/marriage_union_type/unions_of_this_type./people/marriage/location_of_ceremony	/m/022_6
/m/0g83dv	/film/film/other_crew./film/film_crew_gig/film_crew_role	/m/0ch6mp2
/m/025ts_z	/film/film/other_crew./film/film_crew_gig/film_crew_role	/m/089fss
/m/02l7c8	/media_common/netflix_genre/titles	/m/05p09dd
/m/01wbz9	/people/deceased_person/place_of_death	/m/05qtj
/m/059_c	/location/statistical_region/religions./location/religion_percentage/religion	/m/01lp8
/m/0bw87	/award/award_nominee/award_nominations./award/award_nomination/nominated_for	/m/03hj3b3
/m/09f6b	/olympics/olympic_sport/athletes./olympics/olympic_athlete_affiliation/country	/m/0h7x
/m/033_1p	/base/popstra/celebrity/dated./base/popstra/dated/participant	/m/012xdf
/m/04vzv4	/award/award_nominee/award_nominations./award/award_nomination/nominated_for	/m/05dmmc
/m/0154qm	/award/award_nominee/award_nominations./award/award_nomination/award_nominee	/m/02qgyv
/m/02633g	/award/award_nominee/award_nominations./award/award_nomination/award_nominee	/m/0147dk
/m/02yplc	/people/person/religion	/m/0c8wxp
/m/03dctt	/award/award_nominee/award_nominations./award/award_nomination/award	/m/0b6k___
/m/0prh7	/film/film/language	/m/02h40lc
/m/02qk3fk	/film/film/release_date_s./film/film_regional_release_date/film_release_region	/m/04g5k
/m/059f4	/location/location/adjoin_s./location/adjoining_relationship/adjoins	/m/0694j
/m/05n6sq	/film/film/executive_produced_by	/m/027zz
/m/03gh4	/base/popstra/location/vacationers./base/popstra/vacation_choice/vacationer	/m/0147dk
/m/0gx1673	/award/award_ceremony/awards_presented./award/award_honor/award_winner	/m/05mxw33
/m/0glb5	/location/administrative_division/first_level_division_of	/m/0f8l9c
/m/02k1b	/location/location/partially_contains	/m/0p2n
/m/029q_y	/award/award_nominee/award_nominations./award/award_nomination/award_nominee	/m/02p65p
/m/09wj5	/award/award_nominee/award_nominations./award/award_nomination/award_nominee	/m/015t56
/m/09fn1w	/film/film/country	/m/03rk0
/m/016tt2	/award/award_nominee/award_nominations./award/award_nomination/nominated_for	/m/0bj25
/m/0227tr	/award/award_winner/awards_won./award/award_honor/award_winner	/m/02p65p
/m/01p7yb	/award/award_nominee/award_nominations./award/award_nomination/award	/m/02x4x18
/m/08hsww	/award/award_winner/awards_won./award/award_honor/award_winner	/m/072bb1
/m/04vr_f	/film/film/film_format	/m/07fb8_
/m/01wp_jm	/influence/influence_node/influenced_by	/m/01vsy3q
/m/04kxsb	/award/award_category/nominees./award/award_nomination/nominated_for	/m/09p0ct
/m/0287477	/film/film/other_crew./film/film_crew_gig/film_crew_role	/m/0ch6mp2
/m/04jkpgv	/film/film/other_crew./film/film_crew_gig/film_crew_role	/m/0ch6mp2
/m/014j1m	/food/food/nutrients./food/nutrition_fact/nutrient	/m/0h1vg
/m/03t97y	/film/film/other_crew./film/film_crew_gig/film_crew_role	/m/01pvkk
/m/05jjl	/award/award_nominee/award_nominations./award/award_nomination/award_nominee	/m/0b7xl8
/m/073w14	/people/person/gender	/m/05zppz
/m/01wg6y	/music/artist/track_contributions./music/track_contribution/role	/m/0l14qv
/m/05pdh86	/film/film/genre	/m/02l7c8
/m/0gkd1	/music/performance_role/track_performances./music/track_contribution/role	/m/0319l
/m/0n3dv	/location/location/contains	/m/0ynfz
/m/02ryx0	/people/person/profession	/m/0n1h
/m/090s_0	/tv/tv_program/regular_cast./tv/regular_tv_appearance/actor	/m/03jg5t
/m/0g293	/music/genre/artists	/m/01qmy04
/m/02hh8j	/people/person/spouse_s./people/marriage/type_of_union	/m/04ztj
/m/014v6f	/film/actor/film./film/performance/film	/m/064ndc
/m/018417	/people/person/spouse_s./people/marriage/type_of_union	/m/04ztj
/m/05f7w84	/tv/tv_program/genre	/m/0pr6f
/m/060j8b	/film/actor/film./film/performance/film	/m/076tq0z
/m/02v1m7	/award/award_category/winners./award/award_honor/award_winner	/m/0c9l1
/m/0bpm4yw	/film/film/release_date_s./film/film_regional_release_date/film_release_region	/m/07ylj
/m/0m_xy	/location/capital_of_administrative_division/capital_of./location/administrative_division_capital_relationship/administrative_division	/m/0hkq4
/m/07s9rl0	/media_common/netflix_genre/titles	/m/0b2km_
/m/05dbyt	/people/person/places_lived./people/place_lived/location	/m/06_kh
/m/014mlp	/education/educational_degree/people_with_this_degree./education/education/institution	/m/035gt8
/m/016vg8	/people/person/religion	/m/0c8wxp
/m/02r4qs	/people/person/place_of_birth	/m/0wp9b
/m/0b_dy	/award/award_nominee/award_nominations./award/award_nomination/award_nominee	/m/02qgqt
/m/01kr6k	/business/job_title/people_with_this_title./business/employment_tenure/company	/m/01pf21
/m/02x258x	/award/award_category/nominees./award/award_nomination/nominated_for	/m/0m313
/m/08s6mr	/film/film/production_companies	/m/016tt2
/m/0bv8h2	/film/film/genre	/m/02l7c8
/m/0gj96ln	/film/film/release_date_s./film/film_regional_release_date/film_release_region	/m/01crd5
/m/0dplh	/education/educational_institution/students_graduates./education/education/student	/m/04xfb
/m/0dc_ms	/film/film/language	/m/02h40lc
/m/05h43ls	/award/award_winning_work/awards_won./award/award_honor/award_winner	/m/070j61
/m/05cx7x	/award/award_nominee/award_nominations./award/award_nomination/award_nominee	/m/04w391
/m/05g49	/sports/professional_sports_team/draft_picks./sports/sports_league_draft_pick/draft	/m/09l0x9
/m/0ym4t	/organization/organization/headquarters./location/mailing_address/state_province_region	/m/0jt5zcn
/m/03c_pqj	/people/person/nationality	/m/03rk0
/m/02x0bdb	/people/person/spouse_s./people/marriage/type_of_union	/m/04ztj
/m/02rdxsh	/award/award_category/nominees./award/award_nomination/nominated_for	/m/0hmr4
/m/014knw	/award/award_winning_work/awards_won./award/award_honor/award_winner	/m/012v9y
/m/011yhm	/film/film/music	/m/03h610
/m/0879bpq	/film/film/release_date_s./film/film_regional_release_date/film_release_region	/m/0154j
/m/03hy3g	/people/person/spouse_s./people/marriage/type_of_union	/m/04ztj
/m/07rd7	/people/person/spouse_s./people/marriage/type_of_union	/m/04ztj
/m/03rhqg	/music/record_label/artist	/m/04qmr
/m/01txts	/music/record_label/artist	/m/01nz1q6
/m/0gs96	/award/award_category/winners./award/award_honor/ceremony	/m/02yw5r
/m/0db94w	/film/film/release_date_s./film/film_regional_release_date/film_release_region	/m/0154j
/m/0f_nbyh	/award/award_category/nominees./award/award_nomination/nominated_for	/m/0bth54
/m/023kzp	/award/award_nominee/award_nominations./award/award_nomination/nominated_for	/m/011yhm
/m/020_95	/award/award_nominee/award_nominations./award/award_nomination/nominated_for	/m/03cv_gy
/m/0cm2xh	/base/culturalevent/event/entity_involved	/m/0193qj
/m/03cs_xw	/people/person/spouse_s./people/marriage/type_of_union	/m/04ztj
/m/06npd	/military/military_combatant/military_conflicts./military/military_combatant_group/combatants	/m/0193qj
/m/0196bp	/soccer/football_team/current_roster./soccer/football_roster_position/position	/m/0dgrmp
/m/09qwmm	/award/award_category/nominees./award/award_nomination/nominated_for	/m/0344gc
/m/02h4rq6	/education/educational_degree/people_with_this_degree./education/education/student	/m/0157m
/m/023kzp	/award/award_nominee/award_nominations./award/award_nomination/award_nominee	/m/01p4vl
/m/0crx5w	/award/award_nominee/award_nominations./award/award_nomination/award_nominee	/m/02z3zp
/m/015njf	/award/award_nominee/award_nominations./award/award_nomination/award	/m/040njc
/m/03h8_g	/people/person/gender	/m/05zppz
/m/01w724	/award/award_nominee/award_nominations./award/award_nomination/award_nominee	/m/0pj8m
/m/0k1bs	/people/person/religion	/m/0c8wxp
/m/01pcdn	/award/award_nominee/award_nominations./award/award_nomination/nominated_for	/m/0l76z
/m/06z6r	/olympics/olympic_sport/athletes./olympics/olympic_athlete_affiliation/country	/m/07f5x
/m/03cv_gy	/tv/tv_program/languages	/m/02h40lc
/m/049w1q	/film/film/release_date_s./film/film_regional_release_date/film_release_region	/m/0154j
/m/01f3p_	/tv/tv_program/regular_cast./tv/regular_tv_appearance/actor	/m/029q_y
/m/0gqz2	/award/award_category/winners./award/award_honor/ceremony	/m/02yw5r
/m/02xbyr	/film/film/release_date_s./film/film_regional_release_date/film_release_region	/m/04gzd
/m/019fz	/people/person/profession	/m/06q2q
/m/0bp_b2	/award/award_category/winners./award/award_honor/ceremony	/m/07y9ts
/m/0d05w3	/media_common/netflix_genre/titles	/m/05g8pg
/m/0gkg6	/music/group_member/membership./music/group_membership/role	/m/028tv0
/m/05k7sb	/location/location/contains	/m/0tz41
/m/014mlp	/education/educational_degree/people_with_this_degree./education/education/institution	/m/0ym17
/m/01rgr	/people/person/places_lived./people/place_lived/location	/m/05qtj
/m/05pzdk	/award/award_nominee/award_nominations./award/award_nomination/award_nominee	/m/05bnq3j
/m/03h26tm	/people/person/gender	/m/05zppz
/m/0l14qv	/music/performance_role/track_performances./music/track_contribution/role	/m/050rj
/m/04bgy	/music/group_member/membership./music/group_membership/group	/m/01qqwp9
/m/01vsksr	/music/artist/track_contributions./music/track_contribution/role	/m/0xzly
/m/0cwtm	/people/person/spouse_s./people/marriage/spouse	/m/01g969
/m/039bp	/film/actor/film./film/performance/film	/m/032sl_
/m/04g5k	/organization/organization_member/member_of./organization/organization_membership/organization	/m/01rz1
/m/0qf3p	/people/person/gender	/m/05zppz
/m/032md	/people/person/nationality	/m/0h7x
/m/0g9wdmc	/film/film/release_date_s./film/film_regional_release_date/film_release_region	/m/06t2t
/m/05ch98	/film/film/other_crew./film/film_crew_gig/film_crew_role	/m/0ch6mp2
/m/06z9f8	/soccer/football_team/current_roster./sports/sports_team_roster/position	/m/0dgrmp
/m/012201	/people/person/places_lived./people/place_lived/location	/m/0947l
/m/011vx3	/people/person/profession	/m/01c72t
/m/027zz	/people/person/spouse_s./people/marriage/type_of_union	/m/04ztj
/m/06x77g	/award/award_winning_work/awards_won./award/award_honor/award_winner	/m/042l3v
/m/04ztj	/people/marriage_union_type/unions_of_this_type./people/marriage/location_of_ceremony	/m/0824r
/m/09f07	/base/biblioness/bibs_location/country	/m/03rk0
/m/03ln8b	/tv/tv_program/regular_cast./tv/regular_tv_appearance/actor	/m/030znt
/m/0c3351	/media_common/netflix_genre/titles	/m/0btbyn
/m/0209hj	/film/film/music	/m/0pj8m
/m/06cl2w	/people/person/profession	/m/0np9r
/m/01d8l	/olympics/olympic_participating_country/medals_won./olympics/olympic_medal_honor/olympics	/m/018ljb
/m/06g2d1	/award/award_nominee/award_nominations./award/award_nomination/nominated_for	/m/03xf_m
/m/0fttg	/location/location/time_zones	/m/02fqwt
/m/0320jz	/base/popstra/celebrity/canoodled./base/popstra/canoodled/participant	/m/01pw2f1
/m/01rzqj	/award/award_nominee/award_nominations./award/award_nomination/nominated_for	/m/0fpkhkz
/m/01xlqd	/film/film/release_date_s./film/film_regional_release_date/film_release_region	/m/0f8l9c
/m/02nhxf	/award/award_category/winners./award/award_honor/ceremony	/m/019bk0
/m/03xq0f	/film/film_distributor/films_distributed./film/film_film_distributor_relationship/film	/m/0c3ybss
/m/035d1m	/olympics/olympic_sport/athletes./olympics/olympic_athlete_affiliation/country	/m/0h7x
/m/02ts3h	/people/person/places_lived./people/place_lived/location	/m/01n7q
/m/0x67	/people/ethnicity/people	/m/0807ml
/m/0gl3hr	/film/film/genre	/m/04t36
/m/06w6_	/people/person/languages	/m/02h40lc
/m/06c62	/travel/travel_destination/climate./travel/travel_destination_monthly_climate/month	/m/028kb
/m/01zlwg6	/location/hud_county_place/county	/m/0kvt9
/m/0bfvd4	/award/award_category/nominees./award/award_nomination/nominated_for	/m/064r97z
/m/048xg8	/soccer/football_team/current_roster./sports/sports_team_roster/position	/m/0dgrmp
/m/06t74h	/award/award_nominee/award_nominations./award/award_nomination/nominated_for	/m/0cfhfz
/m/02q0k7v	/film/film/production_companies	/m/046b0s
/m/0c40vxk	/film/film/film_festivals	/m/0hrcs29
/m/04yywz	/people/person/spouse_s./people/marriage/type_of_union	/m/04ztj
/m/01v1d8	/music/performance_role/regular_performances./music/group_membership/role	/m/028tv0
/m/0l15bq	/music/performance_role/track_performances./music/track_contribution/role	/m/0l14md
/m/014mlp	/education/educational_degree/people_with_this_degree./education/education/institution	/m/01n_g9
/m/0ggh3	/location/capital_of_administrative_division/capital_of./location/administrative_division_capital_relationship/administrative_division	/m/0jhz_
/m/026mg3	/award/award_category/winners./award/award_honor/award_winner	/m/025l5
/m/063t3j	/people/person/gender	/m/05zppz
/m/0fxky3	/people/person/gender	/m/05zppz
/m/01b9ck	/award/award_nominee/award_nominations./award/award_nomination/award_nominee	/m/016tt2
/m/03ntbmw	/film/film/genre	/m/07s9rl0
/m/035sc2	/people/person/profession	/m/0dxtg
/m/0gtvpkw	/film/film/featured_film_locations	/m/06c62
/m/04kxsb	/award/award_category/winners./award/award_honor/award_winner	/m/015vq_
/m/01kt17	/award/award_nominee/award_nominations./award/award_nomination/award	/m/0789_m
/m/04kj2v	/award/award_nominee/award_nominations./award/award_nomination/nominated_for	/m/016z7s
/m/06c1y	/organization/organization_member/member_of./organization/organization_membership/organization	/m/02jxk
/m/07s9rl0	/media_common/netflix_genre/titles	/m/0q9b0
/m/02ylg6	/film/film/release_date_s./film/film_regional_release_date/film_release_region	/m/04gzd
/m/08cn4_	/award/award_nominee/award_nominations./award/award_nomination/award_nominee	/m/03nkts
/m/01kgg9	/base/popstra/celebrity/dated./base/popstra/dated/participant	/m/0bkmf
/m/016tt2	/film/film_distributor/films_distributed./film/film_film_distributor_relationship/film	/m/05sns6
/m/02hh8j	/people/person/nationality	/m/0f8l9c
/m/02_xgp2	/education/educational_degree/people_with_this_degree./education/education/major_field_of_study	/m/01jzxy
/m/02bqm0	/government/legislative_session/members./government/government_position_held/legislative_sessions	/m/03rtmz
/m/014knw	/film/film/release_date_s./film/film_regional_release_date/film_release_region	/m/0d0vqn
/m/0x67	/people/ethnicity/people	/m/02pzc4
/m/0hsn_	/award/award_nominee/award_nominations./award/award_nomination/nominated_for	/m/0h3mh3q
/m/07brj	/music/performance_role/track_performances./music/track_contribution/role	/m/0gkd1
/m/0259r0	/music/artist/origin	/m/01n7q
/m/0gps0z	/base/popstra/celebrity/canoodled./base/popstra/canoodled/participant	/m/01w9wwg
/m/0x67	/people/ethnicity/people	/m/01wz_ml
/m/0661ql3	/award/award_winning_work/awards_won./award/award_honor/award	/m/02x258x
/m/06z6r	/olympics/olympic_sport/athletes./olympics/olympic_athlete_affiliation/country	/m/01nty
/m/015t56	/award/award_nominee/award_nominations./award/award_nomination/award_nominee	/m/02ck7w
/m/023r2x	/music/performance_role/regular_performances./music/group_membership/role	/m/03qlv7
/m/0cz_ym	/film/film/written_by	/m/07s93v
/m/085jw	/music/performance_role/regular_performances./music/group_membership/group	/m/07m4c
/m/03j0br4	/people/person/places_lived./people/place_lived/location	/m/01n7q
/m/05p09dd	/film/film/release_date_s./film/film_regional_release_date/film_release_region	/m/05b4w
/m/0dgrmp	/sports/sports_position/players./sports/sports_team_roster/team	/m/031zp2
/m/0d0vqn	/olympics/olympic_participating_country/medals_won./olympics/olympic_medal_honor/olympics	/m/019n8z
/m/04jkpgv	/film/film/language	/m/02h40lc
/m/0135xb	/award/award_nominee/award_nominations./award/award_nomination/award	/m/01bgqh
/m/040_lv	/film/film/genre	/m/0vgkd
/m/016z7s	/award/award_winning_work/awards_won./award/award_honor/award_winner	/m/04kj2v
/m/013yq	/travel/travel_destination/how_to_get_here./travel/transportation/mode_of_transportation	/m/07jdr
/m/0227tr	/people/person/languages	/m/064_8sq
/m/0c7t58	/award/award_winner/awards_won./award/award_honor/award_winner	/m/04sry
/m/016ywb	/film/film/production_companies	/m/05f260
/m/049k07	/people/person/profession	/m/0dxtg
/m/03rwz3	/base/schemastaging/organization_extra/phone_number./base/schemastaging/phone_sandbox/service_language	/m/02h40lc
/m/0d0vqn	/olympics/olympic_participating_country/medals_won./olympics/olympic_medal_honor/olympics	/m/018ljb
/m/01xdf5	/people/person/profession	/m/0dxtg
/m/04wp3s	/film/actor/film./film/performance/film	/m/03s9kp
/m/06t2t	/olympics/olympic_participating_country/athletes./olympics/olympic_athlete_affiliation/olympics	/m/06sks6
/m/015qyf	/people/person/spouse_s./people/marriage/type_of_union	/m/04ztj
/m/0c3ns	/people/person/spouse_s./people/marriage/type_of_union	/m/04ztj
/m/01z27	/olympics/olympic_sport/athletes./olympics/olympic_athlete_affiliation/country	/m/0h3y
/m/066l3y	/people/person/profession	/m/0np9r
/m/07c98	/base/biblioness/bibs_location/country	/m/03rk0
/m/03jxw	/influence/influence_node/influenced_by	/m/081k8
/m/0661m4p	/film/film/release_date_s./film/film_regional_release_date/film_release_region	/m/0154j
/m/0lgsq	/people/person/spouse_s./people/marriage/type_of_union	/m/04ztj
/m/058vfp4	/award/award_nominee/award_nominations./award/award_nomination/award_nominee	/m/0584j4n
/m/0clvcx	/award/award_nominee/award_nominations./award/award_nomination/award_nominee	/m/02w9895
/m/01skmp	/film/actor/film./film/performance/film	/m/09bw4_
/m/0gtv7pk	/film/film/release_date_s./film/film_regional_release_date/film_release_region	/m/05b4w
/m/059j4x	/people/person/gender	/m/05zppz
/m/025ts_z	/film/film/language	/m/02h40lc
/m/0cq7tx	/film/film/genre	/m/02l7c8
/m/05gpy	/people/person/gender	/m/05zppz
/m/01vvydl	/award/award_nominee/award_nominations./award/award_nomination/award_nominee	/m/018n6m
/m/0168cl	/people/person/languages	/m/02h40lc
/m/0hmr4	/film/film/genre	/m/02l7c8
/m/01f7gh	/film/film/language	/m/02h40lc
/m/04t36	/media_common/netflix_genre/titles	/m/0fgrm
/m/019pm_	/film/actor/film./film/performance/film	/m/051zy_b
/m/08nvyr	/film/film/language	/m/064_8sq
/m/0bkq_8	/award/award_nominee/award_nominations./award/award_nomination/nominated_for	/m/08cx5g
/m/01w524f	/people/person/places_lived./people/place_lived/location	/m/052bw
/m/03h_9lg	/award/award_nominee/award_nominations./award/award_nomination/award	/m/04kxsb
/m/0crqcc	/people/person/profession	/m/0dxtg
/m/01w9wwg	/music/artist/track_contributions./music/track_contribution/role	/m/0l14qv
/m/02h4rq6	/education/educational_degree/people_with_this_degree./education/education/institution	/m/01swxv
/m/03qnc6q	/film/film/release_date_s./film/film_regional_release_date/film_release_region	/m/05b4w
/m/0gkz15s	/film/film/release_date_s./film/film_regional_release_date/film_release_region	/m/0d0vqn
/m/0mdqp	/film/actor/film./film/performance/film	/m/0b3n61
/m/06823p	/film/film/other_crew./film/film_crew_gig/film_crew_role	/m/01pvkk
/m/02qgqt	/people/person/gender	/m/05zppz
/m/0c4kv	/location/hud_county_place/county	/m/0nm9h
/m/0135nb	/soccer/football_player/current_team./sports/sports_team_roster/team	/m/0hvjr
/m/07f0tw	/people/person/nationality	/m/03rk0
/m/0b2km_	/film/film/other_crew./film/film_crew_gig/film_crew_role	/m/0ch6mp2
/m/022p06	/people/person/gender	/m/05zppz
/m/014v6f	/people/person/places_lived./people/place_lived/location	/m/0281rp
/m/02h4rq6	/education/educational_degree/people_with_this_degree./education/education/student	/m/023kzp
/m/01nds	/organization/organization/headquarters./location/mailing_address/citytown	/m/0dqyw
/m/0344gc	/award/award_winning_work/awards_won./award/award_honor/award	/m/09qwmm
/m/033f8n	/film/film/genre	/m/0556j8
/m/026p4q7	/film/film/language	/m/064_8sq
/m/06t74h	/people/person/gender	/m/05zppz
/m/01ffx4	/film/film/genre	/m/02l7c8
/m/0g2c8	/award/hall_of_fame/inductees./award/hall_of_fame_induction/inductee	/m/07hgm
/m/03t8v3	/people/person/gender	/m/05zppz
/m/01_x6v	/people/person/gender	/m/05zppz
/m/02s2lg	/base/x2010fifaworldcupsouthafrica/world_cup_squad/current_world_cup_squad./base/x2010fifaworldcupsouthafrica/current_world_cup_squad/current_club	/m/01cwm1
/m/04j14qc	/film/film/genre	/m/0hn10
/m/0nlh7	/sports/sports_team_location/teams	/m/0jnmj
/m/01gg59	/award/award_nominee/award_nominations./award/award_nomination/award	/m/054krc
/m/0l14qv	/music/performance_role/track_performances./music/track_contribution/role	/m/0mkg
/m/0301bq	/award/award_nominee/award_nominations./award/award_nomination/award	/m/09qvc0
/m/040b5k	/award/award_winning_work/awards_won./award/award_honor/award	/m/02x258x
/m/01vqc7	/soccer/football_team/current_roster./soccer/football_roster_position/position	/m/0dgrmp
/m/03ryks	/people/person/gender	/m/05zppz
/m/027hjff	/award/award_ceremony/awards_presented./award/award_honor/award_winner	/m/083chw
/m/0l14md	/music/performance_role/regular_performances./music/group_membership/group	/m/01fl3
/m/0424m	/people/person/spouse_s./people/marriage/type_of_union	/m/04ztj
/m/0j3v	/people/person/gender	/m/05zppz
/m/03jldb	/award/award_nominee/award_nominations./award/award_nomination/award	/m/09sb52
/m/014zz1	/music/instrument/family	/m/0d8lm
/m/0m66w	/award/award_winner/awards_won./award/award_honor/award_winner	/m/070j61
/m/03_l8m	/award/award_winner/awards_won./award/award_honor/award_winner	/m/083chw
/m/04gp58p	/award/award_winning_work/awards_won./award/award_honor/award_winner	/m/04353
/m/01svw8n	/people/person/profession	/m/016z4k
/m/02h4rq6	/education/educational_degree/people_with_this_degree./education/education/institution	/m/07xpm
/m/02z5x7l	/film/film/genre	/m/0jxy
/m/01vzx45	/award/award_nominee/award_nominations./award/award_nomination/award_nominee	/m/012xdf
/m/029q_y	/base/popstra/celebrity/friendship./base/popstra/friendship/participant	/m/0h7pj
/m/04hcw	/influence/influence_node/influenced_by	/m/0j3v
/m/06jd89	/soccer/football_team/current_roster./sports/sports_team_roster/position	/m/0dgrmp
/m/016vg8	/award/award_nominee/award_nominations./award/award_nomination/award_nominee	/m/014gf8
/m/027m5wv	/film/film/language	/m/02h40lc
/m/06wjf	/location/administrative_division/country	/m/0d05w3
/m/0l14qv	/music/performance_role/regular_performances./music/group_membership/role	/m/0l14md
/m/0grjmv	/music/genre/artists	/m/01w5n51
/m/019pm_	/base/popstra/celebrity/dated./base/popstra/dated/participant	/m/0h7pj
/m/0509bl	/film/actor/film./film/performance/film	/m/026p4q7
/m/04ktcgn	/award/award_nominee/award_nominations./award/award_nomination/nominated_for	/m/017jd9
/m/02t_8z	/people/person/profession	/m/0np9r
/m/055td_	/film/film/other_crew./film/film_crew_gig/film_crew_role	/m/0ch6mp2
/m/02y9ln	/people/person/spouse_s./people/marriage/type_of_union	/m/04ztj
/m/0dgrmp	/sports/sports_position/players./sports/sports_team_roster/team	/m/01fjz9
/m/01vzx45	/award/award_nominee/award_nominations./award/award_nomination/award	/m/01bgqh
/m/0x67	/people/ethnicity/people	/m/08swgx
/m/09th87	/sports/sports_league_draft/picks./sports/sports_league_draft_pick/school	/m/0dzst
/m/021vwt	/award/award_nominee/award_nominations./award/award_nomination/award_nominee	/m/015vq_
/m/05qtj	/location/location/contains	/m/02cw8s
/m/076tq0z	/film/film/language	/m/02h40lc
/m/015t56	/award/award_nominee/award_nominations./award/award_nomination/award_nominee	/m/01ps2h8
/m/0cqhk0	/award/award_category/winners./award/award_honor/award_winner	/m/0cj36c
/m/032_wv	/film/film/genre	/m/07s9rl0
/m/0338g8	/people/person/gender	/m/05zppz
/m/0187nd	/education/educational_institution/students_graduates./education/education/student	/m/02sh8y
/m/09lhln	/soccer/football_player/current_team./sports/sports_team_roster/team	/m/01x4wq
/m/01gst9	/government/legislative_session/members./government/government_position_held/district_represented	/m/05k7sb
/m/01rzqj	/film/actor/film./film/performance/film	/m/025ts_z
/m/020_95	/award/award_nominee/award_nominations./award/award_nomination/award	/m/09qwmm
/m/01j_9c	/education/educational_institution/colors	/m/067z2v
/m/014j1m	/food/food/nutrients./food/nutrition_fact/nutrient	/m/03d49
/m/012c6j	/people/person/gender	/m/05zppz
/m/07jrjb	/award/award_nominee/award_nominations./award/award_nomination/nominated_for	/m/016tvq
/m/02h4rq6	/education/educational_degree/people_with_this_degree./education/education/institution	/m/02rv1w
/m/02h4rq6	/education/educational_degree/people_with_this_degree./education/education/institution	/m/0hd7j
/m/02779r4	/film/actor/film./film/performance/film	/m/047gpsd
/m/02f73b	/award/award_category/winners./award/award_honor/award_winner	/m/01vs_v8
/m/05qbckf	/film/film/release_date_s./film/film_regional_release_date/film_release_region	/m/04g5k
/m/01p4vl	/award/award_nominee/award_nominations./award/award_nomination/award_nominee	/m/023kzp
/m/05d7rk	/people/person/gender	/m/05zppz
/m/08fn5b	/film/film/language	/m/02h40lc
/m/0kp2_	/music/artist/track_contributions./music/track_contribution/role	/m/01vdm0
/m/02t_zq	/award/award_nominee/award_nominations./award/award_nomination/award	/m/0bp_b2
/m/03j149k	/people/person/profession	/m/04j5jl
/m/03d2k	/people/person/languages	/m/02h40lc
