# Supplementary material
Source: ML conference proceedings conference paper supplement (https://proceedings.neurips.cc/paper_files/paper/2021/hash/0fd600c953cde8121262e322ef09f70e-Abstract.html)
Supplement: Supplementary file 1 [file 0fd600c953cde8121262e322ef09f70e-Supplemental.zip › Supplementary_Material_Paper_8745/data/GraIL-BM_fb237_v3/test/test-fact.txt]

/m/03hmt9b	/film/film/genre	/m/0219x_
/m/016h4r	/music/artist/origin	/m/0_z91
/m/05bt6j	/music/genre/artists	/m/07c0j
/m/01l1ls	/people/person/profession	/m/02hrh1q
/m/043tvp3	/film/film/genre	/m/02kdv5l
/m/04_1l0v	/location/location/contains	/m/03v0t
/m/01fwpt	/people/person/places_lived./people/place_lived/location	/m/02_286
/m/02hsq3m	/award/award_category/nominees./award/award_nomination/nominated_for	/m/0639bg
/m/04nw9	/base/popstra/celebrity/canoodled./base/popstra/canoodled/participant	/m/012dtf
/m/02qvyrt	/award/award_category/nominees./award/award_nomination/nominated_for	/m/02chhq
/m/02l424	/education/educational_institution/students_graduates./education/education/major_field_of_study	/m/04rjg
/m/027y151	/award/award_nominee/award_nominations./award/award_nomination/award_nominee	/m/021yc7p
/m/02y49	/people/person/profession	/m/02hrh1q
/m/016tbr	/award/award_winner/awards_won./award/award_honor/award_winner	/m/09yrh
/m/0821j	/award/award_nominee/award_nominations./award/award_nomination/award_nominee	/m/018fq
/m/05zlld0	/film/film/release_date_s./film/film_regional_release_date/film_release_region	/m/05r4w
/m/085h1	/user/ktrueman/default_domain/international_organization/member_states	/m/01p1b
/m/0c9t0y	/film/film/music	/m/015wc0
/m/02k13d	/tv/non_character_role/tv_regular_personal_appearances./tv/tv_regular_personal_appearance/person	/m/054fvj
/m/01g888	/music/genre/artists	/m/01tv3x2
/m/058frd	/award/award_nominee/award_nominations./award/award_nomination/nominated_for	/m/01bn3l
/m/027c924	/award/award_category/winners./award/award_honor/award_winner	/m/02kxbx3
/m/02yv6b	/music/genre/artists	/m/0jltp
/m/016clz	/music/genre/artists	/m/01wqflx
/m/07t3x8	/people/person/profession	/m/02hrh1q
/m/011z3g	/award/award_nominee/award_nominations./award/award_nomination/award	/m/02f76h
/m/06z68	/olympics/olympic_sport/athletes./olympics/olympic_athlete_affiliation/country	/m/02k54
/m/0bt7w	/music/genre/parent_genre	/m/01243b
/m/01699	/organization/organization_member/member_of./organization/organization_membership/organization	/m/0gkjy
/m/0652ty	/film/actor/film./film/performance/film	/m/0f4k49
/m/0gr42	/award/award_category/nominees./award/award_nomination/nominated_for	/m/0c3zjn7
/m/04zx3q1	/education/educational_degree/people_with_this_degree./education/education/institution	/m/01dyk8
/m/019x62	/award/award_nominee/award_nominations./award/award_nomination/award_nominee	/m/01vsy7t
/m/04n52p6	/film/film/other_crew./film/film_crew_gig/film_crew_role	/m/033smt
/m/01qkqwg	/award/award_winner/awards_won./award/award_honor/award_winner	/m/01309x
/m/02tf1y	/influence/influence_node/influenced_by	/m/014zfs
/m/0k_kr	/music/record_label/artist	/m/09jm8
/m/0jymd	/film/film/release_date_s./film/film_regional_release_date/film_release_region	/m/02_286
/m/0cb4j	/location/location/contains	/m/0h3lt
/m/050023	/award/award_nominee/award_nominations./award/award_nomination/award_nominee	/m/025vldk
/m/0h1p	/award/award_nominee/award_nominations./award/award_nomination/nominated_for	/m/0dx8gj
/m/0fvyg	/sports/sports_team_location/teams	/m/0263cyj
/m/027dtxw	/award/award_category/nominees./award/award_nomination/nominated_for	/m/083shs
/m/0438f	/education/educational_institution/colors	/m/01l849
/m/05tgks	/film/film/story_by	/m/0py5b
/m/01tnxc	/award/award_nominee/award_nominations./award/award_nomination/award_nominee	/m/07h565
/m/014x77	/people/person/spouse_s./people/marriage/location_of_ceremony	/m/02_286
/m/01qqv5	/education/educational_institution/students_graduates./education/education/major_field_of_study	/m/04rjg
/m/0f8grf	/people/person/nationality	/m/03_3d
/m/01vj9c	/music/performance_role/regular_performances./music/group_membership/group	/m/0dvqq
/m/07ncs0	/people/person/places_lived./people/place_lived/location	/m/02_286
/m/02q7fl9	/film/film/other_crew./film/film_crew_gig/film_crew_role	/m/09zzb8
/m/057xs89	/award/award_category/nominees./award/award_nomination/nominated_for	/m/01k1k4
/m/0bqthy	/base/marchmadness/ncaa_basketball_tournament/seeds./base/marchmadness/ncaa_tournament_seed/team	/m/0263cyj
/m/034g2b	/award/award_winner/awards_won./award/award_honor/award_winner	/m/01nm3s
/m/0284gcb	/award/award_winner/awards_won./award/award_honor/award_winner	/m/02778tk
/m/02yr3z	/education/educational_institution/colors	/m/01l849
/m/02hhtj	/base/popstra/celebrity/dated./base/popstra/dated/participant	/m/01pgzn_
/m/09hnb	/award/award_nominee/award_nominations./award/award_nomination/award_nominee	/m/01vrt_c
/m/02j4sk	/people/person/places_lived./people/place_lived/location	/m/04ykg
/m/04ls81	/sports/sports_team/roster./american_football/football_historical_roster_position/position_s	/m/047g8h
/m/0d810y	/people/person/place_of_birth	/m/0f2tj
/m/01wyz92	/people/person/gender	/m/02zsn
/m/017149	/award/award_nominee/award_nominations./award/award_nomination/award_nominee	/m/046m59
/m/0fbtm7	/american_football/football_team/current_roster./sports/sports_team_roster/position	/m/02vkdwz
/m/01wy6	/music/performance_role/regular_performances./music/group_membership/group	/m/01cblr
/m/0b44shh	/film/film/release_date_s./film/film_regional_release_date/film_release_region	/m/03_3d
/m/04mcw4	/film/film/other_crew./film/film_crew_gig/film_crew_role	/m/09zzb8
/m/07s6fsf	/education/educational_degree/people_with_this_degree./education/education/major_field_of_study	/m/011s0
/m/0149xx	/people/person/profession	/m/01c8w0
/m/024n3z	/people/person/profession	/m/02hrh1q
/m/01ck6v	/award/award_category/winners./award/award_honor/award_winner	/m/03j24kf
/m/02m501	/award/award_nominee/award_nominations./award/award_nomination/award	/m/057xs89
/m/06j6l	/music/genre/artists	/m/011z3g
/m/01mylz	/people/person/profession	/m/02hrh1q
/m/0h1mt	/base/popstra/celebrity/canoodled./base/popstra/canoodled/participant	/m/01syr4
/m/026w_gk	/award/award_nominee/award_nominations./award/award_nomination/award_nominee	/m/0284gcb
/m/09cr8	/award/award_winning_work/awards_won./award/award_honor/award	/m/02x73k6
/m/05dptj	/award/award_winning_work/awards_won./award/award_honor/award_winner	/m/01kb2j
/m/02jsgf	/award/award_nominee/award_nominations./award/award_nomination/award	/m/027b9k6
/m/02d9k	/base/popstra/celebrity/friendship./base/popstra/friendship/participant	/m/01trhmt
/m/016z2j	/award/award_nominee/award_nominations./award/award_nomination/award_nominee	/m/03h2d4
/m/01gbn6	/base/popstra/celebrity/dated./base/popstra/dated/participant	/m/0c3p7
/m/06ch55	/music/instrument/instrumentalists	/m/03f4k
/m/07s2s	/film/film_subject/films	/m/01f7jt
/m/05_6_y	/soccer/football_player/current_team./sports/sports_team_roster/team	/m/0272vm
/m/03q0r1	/film/film/release_date_s./film/film_regional_release_date/film_release_region	/m/02k54
/m/051q5	/sports/sports_team/roster./american_football/football_roster_position/position	/m/023wyl
/m/0blg2	/olympics/olympic_games/sports	/m/096f8
/m/01trtc	/music/record_label/artist	/m/0k6yt1
/m/0f6_x	/people/person/profession	/m/02hrh1q
/m/02zyq6	/award/award_nominee/award_nominations./award/award_nomination/award	/m/02x73k6
/m/03p41	/medicine/disease/notable_people_with_this_condition	/m/01vn0t_
/m/019bnn	/award/award_category/winners./award/award_honor/award_winner	/m/012gq6
/m/0j8f09z	/film/film/release_date_s./film/film_regional_release_date/film_release_region	/m/03_3d
/m/073tm9	/music/record_label/artist	/m/03f19q4
/m/027dtxw	/award/award_category/winners./award/award_honor/award_winner	/m/015c4g
/m/0qy5v	/location/hud_county_place/county	/m/0kq08
/m/02qvdc	/sports/sports_position/players./sports/sports_team_roster/team	/m/032yps
/m/05r4w	/organization/organization_member/member_of./organization/organization_membership/organization	/m/0_2v
/m/02_jjm	/education/educational_institution/students_graduates./education/education/student	/m/05wh0sh
/m/0g_bh	/music/genre/parent_genre	/m/08jyyk
/m/0421v9q	/film/film/release_date_s./film/film_regional_release_date/film_release_region	/m/0165v
/m/059gkk	/award/award_nominee/award_nominations./award/award_nomination/award_nominee	/m/0c1ps1
/m/02rq8k8	/film/film/featured_film_locations	/m/0156q
/m/03wbqc4	/film/film/featured_film_locations	/m/02_286
/m/07z1_q	/people/person/gender	/m/02zsn
/m/0b57p6	/people/person/profession	/m/02hrh1q
/m/03q5t	/music/performance_role/regular_performances./music/group_membership/role	/m/0dwtp
/m/04954	/people/person/spouse_s./people/marriage/spouse	/m/059fjj
/m/015t7v	/award/award_winner/awards_won./award/award_honor/award_winner	/m/0241jw
/m/02hsq3m	/award/award_category/nominees./award/award_nomination/nominated_for	/m/0h21v2
/m/04tr1	/organization/organization_member/member_of./organization/organization_membership/organization	/m/02vk52z
/m/01f7jt	/award/award_winning_work/awards_won./award/award_honor/award	/m/02hsq3m
/m/07h565	/award/award_nominee/award_nominations./award/award_nomination/award_nominee	/m/0kjgl
/m/0chw_	/people/person/gender	/m/02zsn
/m/0bksh	/award/award_nominee/award_nominations./award/award_nomination/award_nominee	/m/0lx2l
/m/0ksrf8	/people/person/gender	/m/02zsn
/m/01wy6	/music/performance_role/track_performances./music/track_contribution/role	/m/026g73
/m/0421v9q	/award/award_winning_work/awards_won./award/award_honor/award_winner	/m/025mb_
/m/024rgt	/film/film_distributor/films_distributed./film/film_film_distributor_relationship/film	/m/0315w4
/m/0vmt	/location/location/contains	/m/0m25p
/m/051m56	/award/award_winner/awards_won./award/award_honor/award_winner	/m/02cx90
/m/0q9jk	/tv/tv_program/regular_cast./tv/regular_tv_appearance/actor	/m/021b_
/m/05nrkb	/education/educational_institution/students_graduates./education/education/student	/m/021b_
/m/02rlj20	/film/film/genre	/m/0hfjk
/m/01fmys	/film/film/release_date_s./film/film_regional_release_date/film_release_region	/m/01pj7
/m/02qvyrt	/award/award_category/nominees./award/award_nomination/nominated_for	/m/0btpm6
/m/02fwfb	/film/film/genre	/m/0219x_
/m/0c7lcx	/people/person/profession	/m/02hrh1q
/m/025cn2	/award/award_nominee/award_nominations./award/award_nomination/award_nominee	/m/037lyl
/m/071tyz	/education/educational_degree/people_with_this_degree./education/education/institution	/m/07tk7
/m/03f19q4	/award/award_nominee/award_nominations./award/award_nomination/award_nominee	/m/016kjs
/m/01nrq5	/people/person/places_lived./people/place_lived/location	/m/010y34
/m/02wmbg	/people/person/languages	/m/09bnf
/m/0c9k8	/award/award_winning_work/awards_won./award/award_honor/award	/m/027dtxw
/m/01nx_8	/people/person/places_lived./people/place_lived/location	/m/013n0n
/m/04kkz8	/film/film/other_crew./film/film_crew_gig/film_crew_role	/m/09zzb8
/m/0f4yh	/award/award_winning_work/awards_won./award/award_honor/award	/m/018wdw
/m/01kf3_9	/award/award_nominated_work/award_nominations./award/award_nomination/nominated_for	/m/0g5pvv
/m/09cr8	/award/award_winning_work/awards_won./award/award_honor/award_winner	/m/07h565
/m/0g_bh	/music/genre/parent_genre	/m/0126t5
/m/0f4dx2	/people/person/profession	/m/02hrh1q
/m/0170_p	/film/film/music	/m/0fpjyd
/m/09bymc	/award/award_ceremony/awards_presented./award/award_honor/award_winner	/m/01vwllw
/m/01hgwkr	/award/award_nominee/award_nominations./award/award_nomination/award	/m/02f73p
/m/0151b0	/music/performance_role/track_performances./music/track_contribution/role	/m/01vj9c
/m/05r4w	/organization/organization_member/member_of./organization/organization_membership/organization	/m/0b6css
/m/0k4p0	/film/film/featured_film_locations	/m/02_286
/m/099jhq	/award/award_category/nominees./award/award_nomination/nominated_for	/m/0h03fhx
/m/027dtv3	/award/award_nominee/award_nominations./award/award_nomination/award_nominee	/m/0cjsxp
/m/016kjs	/base/popstra/celebrity/friendship./base/popstra/friendship/participant	/m/03f19q4
/m/09yrh	/award/award_nominee/award_nominations./award/award_nomination/award_nominee	/m/0lx2l
/m/05cl2w	/film/actor/film./film/performance/film	/m/0170_p
/m/06zgc	/olympics/olympic_sport/athletes./olympics/olympic_athlete_affiliation/olympics	/m/0124ld
/m/016clz	/music/genre/artists	/m/016lmg
/m/047q2wc	/award/award_winner/awards_won./award/award_honor/award_winner	/m/06jvj7
/m/026z9	/music/genre/artists	/m/01x1cn2
/m/026g73	/music/performance_role/track_performances./music/track_contribution/role	/m/011k_j
/m/0ddkf	/people/person/places_lived./people/place_lived/location	/m/02_286
/m/01grp0	/government/legislative_session/members./government/government_position_held/district_represented	/m/05tbn
/m/01w4dy	/music/performance_role/track_performances./music/track_contribution/role	/m/01wy6
/m/0qf2t	/film/film/genre	/m/0219x_
/m/01w4dy	/music/performance_role/track_performances./music/track_contribution/role	/m/026g73
/m/034hwx	/film/film/genre	/m/02kdv5l
/m/01mgw	/award/award_winning_work/awards_won./award/award_honor/award	/m/0262s1
/m/02wwsh8	/award/award_category/winners./award/award_honor/award_winner	/m/027vps
/m/07dzf	/organization/organization_member/member_of./organization/organization_membership/organization	/m/02vk52z
/m/0k_kr	/music/record_label/artist	/m/01vn0t_
/m/04ls81	/sports/sports_team/roster./american_football/football_roster_position/position	/m/02vkdwz
/m/0jrny	/people/person/place_of_birth	/m/02_286
/m/01vsy7t	/people/person/profession	/m/02hrh1q
/m/01kf3_9	/award/award_nominated_work/award_nominations./award/award_nomination/nominated_for	/m/0fsw_7
/m/02fqrf	/film/film/release_date_s./film/film_regional_release_date/film_release_region	/m/03_3d
/m/0x3r3	/influence/influence_node/influenced_by	/m/01lwx
/m/05dxl5	/people/person/gender	/m/02zsn
/m/03tcbx	/government/legislative_session/members./government/government_position_held/legislative_sessions	/m/02bn_p
/m/08jyyk	/music/genre/artists	/m/016ntp
/m/04mcw4	/film/film/music	/m/0146pg
/m/047g8h	/sports/sports_position/players./sports/sports_team_roster/team	/m/0fbtm7
/m/06w99h3	/film/film/genre	/m/0hfjk
/m/0c33pl	/people/person/gender	/m/02zsn
/m/02r1c18	/film/film/release_date_s./film/film_regional_release_date/film_release_region	/m/05r4w
/m/0cwfgz	/award/award_nominated_work/award_nominations./award/award_nomination/nominated_for	/m/06c0ns
/m/0fztbq	/film/film/genre	/m/0bkbm
/m/04gcd1	/people/person/profession	/m/02jknp
/m/016gr2	/award/award_nominee/award_nominations./award/award_nomination/award_nominee	/m/01sp81
/m/0b_6x2	/time/event/locations	/m/0ftxw
/m/08jyyk	/music/genre/artists	/m/06br6t
/m/0fpv_3_	/film/film/release_date_s./film/film_regional_release_date/film_release_region	/m/047lj
/m/03ys2f	/award/award_winner/awards_won./award/award_honor/award_winner	/m/03ysmg
/m/099jhq	/award/award_category/nominees./award/award_nomination/nominated_for	/m/07s846j
/m/0bxtg	/people/person/profession	/m/02jknp
/m/08qnnv	/education/educational_institution/students_graduates./education/education/major_field_of_study	/m/040p_q
/m/02bqmq	/government/legislative_session/members./government/government_position_held/legislative_sessions	/m/07p__7
/m/028r4y	/award/award_nominee/award_nominations./award/award_nomination/award_nominee	/m/01tnxc
/m/042fk	/people/deceased_person/place_of_death	/m/0l4vc
/m/024n3z	/award/award_nominee/award_nominations./award/award_nomination/award_nominee	/m/03ym1
/m/02xry	/location/statistical_region/religions./location/religion_percentage/religion	/m/02t7t
/m/023gxx	/film/film/release_date_s./film/film_regional_release_date/film_release_region	/m/03_3d
/m/03wnh	/american_football/football_team/current_roster./sports/sports_team_roster/position	/m/023wyl
/m/01wy6	/music/performance_role/track_performances./music/track_contribution/role	/m/01w4dy
/m/023zsh	/award/award_nominee/award_nominations./award/award_nomination/nominated_for	/m/057lbk
/m/0hqly	/people/person/profession	/m/02jknp
/m/01pgzn_	/base/popstra/celebrity/canoodled./base/popstra/canoodled/participant	/m/05bnp0
/m/08720	/film/film/release_date_s./film/film_regional_release_date/film_release_region	/m/05r4w
/m/06151l	/award/award_nominee/award_nominations./award/award_nomination/award_nominee	/m/0c4f4
/m/02qvyrt	/award/award_category/nominees./award/award_nomination/nominated_for	/m/028_yv
/m/01vw87c	/people/person/profession	/m/02hrh1q
/m/0f0y8	/music/artist/track_contributions./music/track_contribution/role	/m/03t22m
/m/0_92w	/film/film/release_date_s./film/film_regional_release_date/film_release_region	/m/03h64
/m/018h2	/film/film_subject/films	/m/0d8w2n
/m/05qjt	/education/field_of_study/students_majoring./education/education/major_field_of_study	/m/04rjg
/m/0159h6	/people/person/profession	/m/02hrh1q
/m/01g257	/award/award_nominee/award_nominations./award/award_nomination/award_nominee	/m/07d3z7
/m/01j851	/people/person/places_lived./people/place_lived/location	/m/013n0n
/m/03tk6z	/award/award_category/winners./award/award_honor/ceremony	/m/056878
/m/0djkrp	/film/film/genre	/m/01t_vv
/m/0pd4f	/film/film/genre	/m/02kdv5l
/m/03t95n	/film/film/genre	/m/02kdv5l
/m/0bxtg	/film/director/film	/m/0c00zd0
/m/02qfhb	/people/person/profession	/m/02hrh1q
/m/01mhwk	/award/award_ceremony/awards_presented./award/award_honor/award_winner	/m/0d193h
/m/016kjs	/award/award_nominee/award_nominations./award/award_nomination/award_nominee	/m/01q32bd
/m/06bnz	/organization/organization_member/member_of./organization/organization_membership/organization	/m/02vk52z
/m/0892sx	/music/artist/track_contributions./music/track_contribution/role	/m/01vj9c
/m/01l4zqz	/award/award_winner/awards_won./award/award_honor/award_winner	/m/02cx90
/m/0cbkc	/people/person/profession	/m/02hrh1q
/m/0bqsy	/award/award_nominee/award_nominations./award/award_nomination/award	/m/01c427
/m/07vyf	/education/educational_institution/students_graduates./education/education/student	/m/0py5b
/m/01dbk6	/people/person/profession	/m/02hrh1q
/m/05z43v	/film/film/genre	/m/017fp
/m/0cpz4k	/tv/tv_program/regular_cast./tv/regular_tv_appearance/actor	/m/02_wxh
/m/025jfl	/award/award_nominee/award_nominations./award/award_nomination/nominated_for	/m/03hmt9b
/m/04wmvz	/sports/professional_sports_team/draft_picks./sports/sports_league_draft_pick/school	/m/07w0v
/m/01xcr4	/tv/tv_personality/tv_regular_appearances./tv/tv_regular_personal_appearance/program	/m/0304nh
/m/016clz	/music/genre/artists	/m/01cblr
/m/0fzyg	/film/film_subject/films	/m/03n3gl
/m/0gpmp	/people/person/profession	/m/0q04f
/m/03swmf	/people/person/places_lived./people/place_lived/location	/m/02_286
/m/08vlns	/music/genre/artists	/m/01nkxvx
/m/01pctb	/film/actor/film./film/performance/film	/m/01shy7
/m/0xv2x	/music/genre/artists	/m/01w03jv
/m/02ptzz0	/sports/sports_team/roster./basketball/basketball_roster_position/position	/m/0ctt4z
/m/0z4s	/award/award_nominee/award_nominations./award/award_nomination/award_nominee	/m/02jsgf
/m/0971v	/food/food/nutrients./food/nutrition_fact/nutrient	/m/0h1tz
/m/0mwh1	/location/us_county/county_seat	/m/0_7z2
/m/07xzm	/music/performance_role/regular_performances./music/group_membership/role	/m/01vj9c
/m/0172rj	/music/genre/parent_genre	/m/0296y
/m/01s21dg	/people/person/places_lived./people/place_lived/location	/m/02_286
/m/06bss	/government/politician/government_positions_held./government/government_position_held/legislative_sessions	/m/02bqmq
/m/01cj6y	/award/award_nominee/award_nominations./award/award_nomination/award_nominee	/m/01pkhw
/m/027pdrh	/people/person/gender	/m/02zsn
/m/01lct6	/government/politician/government_positions_held./government/government_position_held/legislative_sessions	/m/070mff
/m/05mrf_p	/film/film/featured_film_locations	/m/0156q
/m/012gq6	/award/award_nominee/award_nominations./award/award_nomination/award	/m/019bnn
/m/03j90	/people/person/places_lived./people/place_lived/location	/m/05r4w
/m/025_64l	/american_football/football_team/current_roster./sports/sports_team_roster/position	/m/02vkdwz
/m/026b33f	/tv/tv_program/genre	/m/09lmb
/m/059gkk	/award/award_nominee/award_nominations./award/award_nomination/award_nominee	/m/0bl60p
/m/016yvw	/award/award_nominee/award_nominations./award/award_nomination/award	/m/057xs89
/m/01rnxn	/film/actor/film./film/performance/film	/m/01fwzk
/m/0c4f4	/people/person/gender	/m/02zsn
/m/0lk8j	/olympics/olympic_games/sports	/m/096f8
/m/03knl	/film/actor/film./film/performance/film	/m/01qb5d
/m/02r22gf	/award/award_category/nominees./award/award_nomination/nominated_for	/m/09q5w2
/m/0bv7t	/people/person/places_lived./people/place_lived/location	/m/071cn
/m/08720	/film/film/production_companies	/m/0g1rw
/m/01vrt_c	/award/award_winner/awards_won./award/award_honor/award_winner	/m/01wyz92
/m/0821j	/award/award_nominee/award_nominations./award/award_nomination/award	/m/0262yt
/m/09gkx35	/film/film/release_date_s./film/film_regional_release_date/film_release_region	/m/03_3d
/m/09l9tq	/sports/pro_athlete/teams./sports/sports_team_roster/team	/m/01cwq9
/m/065b6q	/people/ethnicity/people	/m/0137g1
/m/01f7v_	/award/award_nominee/award_nominations./award/award_nomination/nominated_for	/m/01f8gz
/m/044qx	/award/award_nominee/award_nominations./award/award_nomination/nominated_for	/m/0gxfz
/m/02pw_n	/film/film/executive_produced_by	/m/0d_skg
/m/0c4f4	/base/popstra/celebrity/dated./base/popstra/dated/participant	/m/033tln
/m/057xs89	/award/award_category/nominees./award/award_nomination/nominated_for	/m/02vxq9m
/m/02w7gg	/people/ethnicity/people	/m/01sp81
/m/0bxtg	/award/award_nominee/award_nominations./award/award_nomination/award	/m/0279c15
/m/018wdw	/award/award_category/nominees./award/award_nomination/nominated_for	/m/02dr9j
/m/05kfs	/people/person/place_of_birth	/m/02_286
/m/01kb2j	/award/award_nominee/award_nominations./award/award_nomination/award_nominee	/m/04t7ts
/m/04954	/award/award_winner/awards_won./award/award_honor/award_winner	/m/017149
/m/01nm3s	/award/award_winner/awards_won./award/award_honor/award_winner	/m/034g2b
/m/0gjcrrw	/film/film/release_date_s./film/film_regional_release_date/film_release_region	/m/03_3d
/m/02778tk	/tv/tv_writer/tv_programs./tv/tv_program_writer_relationship/tv_program	/m/0d68qy
/m/071jrc	/people/deceased_person/place_of_death	/m/0k_p5
/m/05tbn	/location/statistical_region/religions./location/religion_percentage/religion	/m/051kv
/m/02zrv7	/film/actor/film./film/performance/film	/m/01shy7
/m/0fbvqf	/award/award_category/nominees./award/award_nomination/nominated_for	/m/015ppk
/m/0jnb0	/influence/influence_node/peers./influence/peer_relationship/peers	/m/01c58j
/m/01l79yc	/award/award_nominee/award_nominations./award/award_nomination/nominated_for	/m/083shs
/m/0l1589	/music/performance_role/track_performances./music/track_contribution/role	/m/01vj9c
/m/02d9k	/base/popstra/celebrity/friendship./base/popstra/friendship/participant	/m/014zcr
/m/0971v	/food/food/nutrients./food/nutrition_fact/nutrient	/m/025s0zp
/m/01309x	/award/award_winner/awards_won./award/award_honor/award_winner	/m/01qkqwg
/m/01fmys	/film/film/release_date_s./film/film_regional_release_date/film_release_region	/m/06bnz
/m/04ls81	/sports/sports_team/roster./american_football/football_roster_position/position	/m/02g_6x
/m/02qvyrt	/award/award_category/nominees./award/award_nomination/nominated_for	/m/05jzt3
/m/02778tk	/award/award_winner/awards_won./award/award_honor/award_winner	/m/0p_2r
/m/02dr9j	/award/award_winning_work/awards_won./award/award_honor/award	/m/027b9k6
/m/0mm1q	/award/award_nominee/award_nominations./award/award_nomination/award	/m/05f4m9q
/m/0j6b5	/film/film/release_date_s./film/film_regional_release_date/film_release_region	/m/0161c
/m/0btpm6	/award/award_winning_work/awards_won./award/award_honor/award	/m/027dtxw
/m/0cqh6z	/award/award_category/nominees./award/award_nomination/nominated_for	/m/0180mw
/m/01hkhq	/award/award_winner/awards_won./award/award_honor/award_winner	/m/01sp81
/m/024rgt	/film/film_distributor/films_distributed./film/film_film_distributor_relationship/film	/m/04qw17
/m/0j1z8	/organization/organization_member/member_of./organization/organization_membership/organization	/m/02vk52z
/m/07w21	/people/person/gender	/m/02zsn
/m/03s7h	/base/schemastaging/organization_extra/phone_number./base/schemastaging/phone_sandbox/service_location	/m/03_3d
/m/01gssz	/government/legislative_session/members./government/government_position_held/district_represented	/m/05tbn
/m/063y_ky	/award/award_category/nominees./award/award_nomination/nominated_for	/m/0j8f09z
/m/01795t	/film/film_distributor/films_distributed./film/film_film_distributor_relationship/film	/m/0jnwx
/m/0jnm_	/sports/sports_team/colors	/m/06fvc
/m/01vyv9	/award/award_nominee/award_nominations./award/award_nomination/award_nominee	/m/034zc0
/m/03_lf	/influence/influence_node/influenced_by	/m/048cl
/m/056878	/award/award_ceremony/awards_presented./award/award_honor/award_winner	/m/01s21dg
/m/07s6fsf	/education/educational_degree/people_with_this_degree./education/education/institution	/m/0c5x_
/m/041p3y	/music/record_label/artist	/m/0m_31
/m/047g8h	/sports/sports_position/players./sports/sports_team_roster/team	/m/043vc
/m/08815	/education/educational_institution/students_graduates./education/education/major_field_of_study	/m/04rjg
/m/01fwk3	/film/actor/film./film/performance/film	/m/0k4p0
/m/06mnbn	/people/person/gender	/m/02zsn
/m/01yhm	/baseball/baseball_team/team_stats./baseball/baseball_team_stats/season	/m/04110b0
/m/05dxl5	/award/award_nominee/award_nominations./award/award_nomination/award_nominee	/m/03x16f
/m/010hn	/people/person/places_lived./people/place_lived/location	/m/01ktz1
/m/017149	/award/award_winner/awards_won./award/award_honor/award_winner	/m/04954
/m/04mzf8	/film/film/film_art_direction_by	/m/05v1sb
/m/04954	/award/award_nominee/award_nominations./award/award_nomination/award_nominee	/m/01pkhw
/m/01rr9f	/award/award_winner/awards_won./award/award_honor/award_winner	/m/09yrh
/m/01xzb6	/award/award_nominee/award_nominations./award/award_nomination/award	/m/01ck6h
/m/017v_	/base/aareas/schema/administrative_area/capital	/m/02h6_6p
/m/0m24v	/location/location/adjoin_s./location/adjoining_relationship/adjoins	/m/0m25p
/m/07c6l	/music/performance_role/regular_performances./music/group_membership/role	/m/01vj9c
/m/07gxw	/music/genre/artists	/m/02k5sc
/m/08ff1k	/award/award_nominee/award_nominations./award/award_nomination/nominated_for	/m/0gy4k
/m/0bzlrh	/award/award_ceremony/awards_presented./award/award_honor/award_winner	/m/019x62
/m/02kfzz	/film/film/cinematography	/m/05br10
/m/09rvwmy	/film/film/other_crew./film/film_crew_gig/film_crew_role	/m/09zzb8
/m/0sxg4	/film/film/story_by	/m/053ksp
/m/02_340	/people/person/profession	/m/02jknp
/m/02r9p0c	/film/film/country	/m/03_3d
/m/0pyg6	/award/award_nominee/award_nominations./award/award_nomination/award	/m/01c427
/m/07c0j	/award/award_winner/awards_won./award/award_honor/award_winner	/m/01vsy7t
/m/0h0jz	/people/person/profession	/m/02hrh1q
/m/05zlld0	/film/film/production_companies	/m/01gb54
/m/05k2xy	/film/film/other_crew./film/film_crew_gig/film_crew_role	/m/09zzb8
/m/01ypc	/sports/sports_team/colors	/m/06fvc
/m/01pcz9	/award/award_nominee/award_nominations./award/award_nomination/award_nominee	/m/016z2j
/m/0gsg7	/tv/tv_network/programs./tv/tv_network_duration/program	/m/0304nh
/m/018qb4	/user/jg/default_domain/olympic_games/sports	/m/06wrt
/m/01lct6	/people/person/profession	/m/02hrh1q
/m/01ycbq	/award/award_nominee/award_nominations./award/award_nomination/award_nominee	/m/08jfkw
/m/05f0r8	/people/person/profession	/m/02hrh1q
/m/0d1swh	/soccer/football_player/current_team./sports/sports_team_roster/team	/m/06cmd2
/m/0fx0mw	/award/award_winner/awards_won./award/award_honor/award_winner	/m/03w1v2
/m/03cp4cn	/film/film/cinematography	/m/06r_by
/m/02x4wr9	/award/award_category/nominees./award/award_nomination/nominated_for	/m/01mgw
/m/04h6mm	/people/person/place_of_birth	/m/0c_m3
/m/0969vz	/award/award_nominee/award_nominations./award/award_nomination/award	/m/03rbj2
/m/015wnl	/film/actor/film./film/performance/film	/m/076tw54
/m/0crc2cp	/film/film/release_date_s./film/film_regional_release_date/film_release_region	/m/06bnz
/m/01kf3_9	/award/award_nominated_work/award_nominations./award/award_nomination/nominated_for	/m/0fztbq
/m/0q1lp	/people/person/profession	/m/02jknp
/m/0g768	/music/record_label/artist	/m/027kwc
/m/01dbk6	/award/award_nominee/award_nominations./award/award_nomination/award_nominee	/m/05ry0p
/m/02_qt	/film/film/genre	/m/02kdv5l
/m/042fk	/government/politician/government_positions_held./government/government_position_held/legislative_sessions	/m/01gtdd
/m/0192hw	/film/film/genre	/m/082gq
/m/033fqh	/film/film/music	/m/016szr
/m/026w_gk	/award/award_winner/awards_won./award/award_honor/award_winner	/m/0284gcb
/m/0639bg	/film/film/language	/m/04306rv
/m/017kz7	/film/film/genre	/m/01j1n2
/m/0b_734	/base/marchmadness/ncaa_basketball_tournament/seeds./base/marchmadness/ncaa_tournament_seed/team	/m/0263cyj
/m/01dvtx	/influence/influence_node/influenced_by	/m/04xm_
/m/04954	/award/award_winner/awards_won./award/award_honor/award_winner	/m/05hj0n
/m/06mt91	/award/award_nominee/award_nominations./award/award_nomination/award_nominee	/m/02k5sc
/m/01_d4	/travel/travel_destination/climate./travel/travel_destination_monthly_climate/month	/m/0ll3
/m/026w_gk	/tv/tv_producer/programs_produced./tv/tv_producer_term/program	/m/0d68qy
/m/07ymr5	/tv/tv_personality/tv_regular_appearances./tv/tv_regular_personal_appearance/program	/m/039cq4
/m/015wnl	/film/actor/film./film/performance/film	/m/035s95
/m/0k8y7	/base/popstra/celebrity/dated./base/popstra/dated/participant	/m/02fn5
/m/0156q	/location/statistical_region/religions./location/religion_percentage/religion	/m/05sfs
/m/08cn_n	/people/person/place_of_birth	/m/0167q3
/m/01z215	/location/location/adjoin_s./location/adjoining_relationship/adjoins	/m/0161c
/m/02wrrm	/people/person/places_lived./people/place_lived/location	/m/02_286
/m/0dfjb8	/people/person/profession	/m/02jknp
/m/01g888	/music/genre/artists	/m/014pg1
/m/01771z	/award/award_nominated_work/award_nominations./award/award_nomination/nominated_for	/m/0cwfgz
/m/01cky2	/award/award_category/winners./award/award_honor/award_winner	/m/012x4t
/m/024n3z	/award/award_winner/awards_won./award/award_honor/award_winner	/m/015t7v
/m/0fc9js	/award/award_category/winners./award/award_honor/award_winner	/m/030tjk
/m/02896	/sports/sports_team/roster./american_football/football_roster_position/position	/m/047g8h
/m/02z1nbg	/award/award_category/nominees./award/award_nomination/nominated_for	/m/0462hhb
/m/0284gcb	/tv/tv_writer/tv_programs./tv/tv_program_writer_relationship/tv_program	/m/02hct1
/m/01vz0g4	/celebrities/celebrity/sexual_relationships./celebrities/romantic_relationship/celebrity	/m/01wyz92
/m/01mv_n	/award/award_winner/awards_won./award/award_honor/award_winner	/m/03dbww
/m/0d68qy	/award/award_winning_work/awards_won./award/award_honor/award_winner	/m/0284gcb
/m/05f4m9q	/award/award_category/nominees./award/award_nomination/nominated_for	/m/02rq8k8
/m/03_3d	/organization/organization_member/member_of./organization/organization_membership/organization	/m/07t65
/m/026v437	/award/award_nominee/award_nominations./award/award_nomination/award_nominee	/m/040981l
/m/0fpv_3_	/film/film/release_date_s./film/film_regional_release_date/film_release_region	/m/06bnz
/m/0879xc	/sports/pro_athlete/teams./sports/sports_team_roster/team	/m/0mmd6
/m/0g1rw	/film/film_distributor/films_distributed./film/film_film_distributor_relationship/film	/m/02fwfb
/m/0152cw	/people/person/gender	/m/02zsn
/m/0263tn1	/award/award_nominee/award_nominations./award/award_nomination/award_nominee	/m/0dgskx
/m/085h1	/user/ktrueman/default_domain/international_organization/member_states	/m/0164b
/m/050r1z	/film/film/music	/m/01kd57
/m/0l3h	/organization/organization_member/member_of./organization/organization_membership/organization	/m/07t65
/m/056878	/award/award_ceremony/awards_presented./award/award_honor/award_winner	/m/02lk95
/m/02qvyrt	/award/award_category/nominees./award/award_nomination/nominated_for	/m/0m63c
/m/020y73	/film/film/genre	/m/082gq
/m/02qny_	/sports/pro_athlete/teams./sports/sports_team_roster/team	/m/01k2xy
/m/0drs7	/location/location/adjoin_s./location/adjoining_relationship/adjoins	/m/0drs_
/m/02yv6b	/music/genre/artists	/m/01s21dg
/m/0jqp3	/film/film/written_by	/m/0170vn
/m/0fqjks	/award/award_winner/awards_won./award/award_honor/award_winner	/m/05v1sb
/m/02r0csl	/award/award_category/nominees./award/award_nomination/nominated_for	/m/0sxg4
/m/04d_mtq	/celebrities/celebrity/celebrity_friends./celebrities/friendship/friend	/m/0dxmyh
/m/01vvlyt	/people/person/places_lived./people/place_lived/location	/m/0lhn5
/m/06j8wx	/award/award_winner/awards_won./award/award_honor/award_winner	/m/01hkhq
/m/0bp_7	/location/capital_of_administrative_division/capital_of./location/administrative_division_capital_relationship/administrative_division	/m/09krp
/m/0jm4b	/sports/professional_sports_team/draft_picks./sports/sports_league_draft_pick/draft	/m/06439y
/m/01w8n89	/people/person/profession	/m/0gbbt
/m/07dzf	/organization/organization_member/member_of./organization/organization_membership/organization	/m/07t65
/m/02d42t	/people/person/profession	/m/02hrh1q
/m/0d8w2n	/film/film/genre	/m/0219x_
/m/09728	/food/food/nutrients./food/nutrition_fact/nutrient	/m/09gvd
/m/0512p	/sports/professional_sports_team/draft_picks./sports/sports_league_draft_pick/school	/m/0f1nl
/m/06439y	/sports/sports_league_draft/picks./sports/sports_league_draft_pick/school	/m/02ln0f
/m/03xn3s2	/people/person/profession	/m/02hrh1q
/m/0bdxs5	/film/actor/film./film/performance/film	/m/07ykkx5
/m/03t22m	/music/instrument/instrumentalists	/m/01qdjm
/m/01nkxvx	/music/artist/track_contributions./music/track_contribution/role	/m/07xzm
/m/023wyl	/sports/sports_position/players./sports/sports_team_roster/team	/m/0fgg8c
/m/023zsh	/film/actor/film./film/performance/film	/m/057lbk
/m/0p_2r	/tv/tv_producer/programs_produced./tv/tv_producer_term/program	/m/0d68qy
/m/01q9b9	/people/person/profession	/m/016fly
/m/02kz_	/people/person/employment_history./business/employment_tenure/company	/m/03y7ml
/m/07wtc	/education/educational_institution/students_graduates./education/education/major_field_of_study	/m/04rjg
/m/061xq	/sports/professional_sports_team/draft_picks./sports/sports_league_draft_pick/school	/m/09f2j
/m/02jq1	/people/person/spouse_s./people/marriage/location_of_ceremony	/m/0cv3w
/m/0blg2	/user/jg/default_domain/olympic_games/sports	/m/096f8
/m/012x4t	/award/award_nominee/award_nominations./award/award_nomination/award_nominee	/m/01w272y
/m/08pth9	/people/person/religion	/m/06nzl
/m/0jbyg	/award/award_winner/awards_won./award/award_honor/award_winner	/m/0ddkf
/m/0k3p	/base/biblioness/bibs_location/state	/m/0fqyc
/m/0m7d0	/location/location/adjoin_s./location/adjoining_relationship/adjoins	/m/0mw93
/m/0sz28	/base/popstra/celebrity/dated./base/popstra/dated/participant	/m/0152cw
/m/0vbk	/location/location/contains	/m/0qxhc
/m/0dvqq	/award/award_nominee/award_nominations./award/award_nomination/award	/m/01c427
/m/027dtxw	/award/award_category/winners./award/award_honor/award_winner	/m/015wnl
/m/011k11	/music/record_label/artist	/m/0277c3
/m/09bymc	/award/award_ceremony/awards_presented./award/award_honor/award_winner	/m/05ldnp
/m/08720	/film/film/other_crew./film/film_crew_gig/film_crew_role	/m/09zzb8
/m/027s4dn	/award/award_category/winners./award/award_honor/ceremony	/m/09qftb
/m/085h1	/user/ktrueman/default_domain/international_organization/member_states	/m/07dzf
/m/01nrq5	/film/actor/film./film/performance/film	/m/04g73n
/m/0g1rw	/film/film_distributor/films_distributed./film/film_film_distributor_relationship/film	/m/0jqd3
/m/026c1	/celebrities/celebrity/celebrity_friends./celebrities/friendship/friend	/m/0bksh
/m/03cxsvl	/award/award_nominee/award_nominations./award/award_nomination/award_nominee	/m/0fn8jc
/m/026kmvf	/soccer/football_player/current_team./sports/sports_team_roster/team	/m/03v9yw
/m/01fkr_	/tv/tv_network/programs./tv/tv_network_duration/program	/m/026b33f
/m/02x2gy0	/award/award_category/nominees./award/award_nomination/nominated_for	/m/04qk12
/m/0fpv_3_	/film/film/release_date_s./film/film_regional_release_date/film_release_region	/m/06f32
/m/05kfs	/film/director/film	/m/09sr0
/m/0dwt5	/music/performance_role/track_performances./music/track_contribution/role	/m/07c6l
/m/06151l	/award/award_nominee/award_nominations./award/award_nomination/award_nominee	/m/07h565
/m/057lbk	/film/film/featured_film_locations	/m/02_286
/m/02xb2bt	/award/award_winner/awards_won./award/award_honor/award_winner	/m/0dgskx
/m/0d68qy	/award/award_winning_work/awards_won./award/award_honor/award_winner	/m/02778tk
/m/01vsy7t	/influence/influence_node/influenced_by	/m/048xh
/m/06bss	/government/politician/government_positions_held./government/government_position_held/legislative_sessions	/m/04h1rz
/m/026v437	/people/person/profession	/m/02hrh1q
/m/01gv_f	/people/person/religion	/m/04pk9
/m/044mfr	/people/person/profession	/m/02hrh1q
/m/09d11	/medicine/disease/risk_factors	/m/03p41
/m/02tr7d	/people/person/gender	/m/02zsn
/m/0dyl9	/sports/sports_team_location/teams	/m/0jmbv
/m/0ddd0gc	/award/award_winning_work/awards_won./award/award_honor/award_winner	/m/0263tn1
/m/04lqvlr	/film/film/genre	/m/017fp
/m/05bt6j	/music/genre/artists	/m/0gdh5
/m/0dwtp	/music/performance_role/track_performances./music/track_contribution/role	/m/0151b0
/m/06zgc	/olympics/olympic_sport/athletes./olympics/olympic_athlete_affiliation/country	/m/06bnz
/m/06v41q	/people/ethnicity/people	/m/058ncz
/m/09728	/food/food/nutrients./food/nutrition_fact/nutrient	/m/025sf0_
/m/01tnxc	/award/award_nominee/award_nominations./award/award_nomination/nominated_for	/m/09cr8
/m/0bdxs5	/people/person/gender	/m/02zsn
/m/0dbb3	/people/person/profession	/m/02hrh1q
/m/099p5	/people/person/religion	/m/04pk9
/m/02d9k	/soccer/football_player/current_team./sports/sports_team_roster/team	/m/06l22
/m/02kxbx3	/award/award_nominee/award_nominations./award/award_nomination/nominated_for	/m/02r1c18
/m/028r4y	/award/award_winner/awards_won./award/award_honor/award_winner	/m/01tnxc
/m/039c26	/award/award_winning_work/awards_won./award/award_honor/award	/m/09v7wsg
/m/01trtc	/music/record_label/artist	/m/03y82t6
/m/011ypx	/film/film/executive_produced_by	/m/05hj_k
/m/0mm1q	/film/director/film	/m/01dvbd
/m/092c5f	/award/award_ceremony/awards_presented./award/award_honor/honored_for	/m/01g03q
/m/015gy7	/people/deceased_person/place_of_death	/m/02_286
/m/014x77	/film/actor/film./film/performance/film	/m/0c0yh4
/m/03lrht	/film/film/other_crew./film/film_crew_gig/film_crew_role	/m/09zzb8
/m/0h95927	/film/film/release_date_s./film/film_regional_release_date/film_release_region	/m/06f32
/m/011yl_	/award/award_winning_work/awards_won./award/award_honor/award	/m/02r22gf
/m/0bytkq	/award/award_nominee/award_nominations./award/award_nomination/nominated_for	/m/03cp4cn
/m/02rwmk	/time/event/locations	/m/0166b
/m/07vhb	/education/educational_institution/students_graduates./education/education/student	/m/01w03jv
/m/0fzyg	/film/film_subject/films	/m/025rvx0
/m/04lhc4	/award/award_winning_work/awards_won./award/award_honor/award	/m/027b9k6
/m/01kp66	/people/person/gender	/m/02zsn
/m/01_bkd	/music/genre/artists	/m/01vtqml
/m/0jymd	/award/award_winning_work/awards_won./award/award_honor/award_winner	/m/070bjw
/m/02fqrf	/film/film/release_date_s./film/film_regional_release_date/film_release_region	/m/06bnz
/m/05hj_k	/people/person/sibling_s./people/sibling_relationship/sibling	/m/06q8hf
/m/07ss8_	/award/award_nominee/award_nominations./award/award_nomination/award	/m/02f76h
/m/04954	/film/actor/film./film/performance/film	/m/02vqsll
/m/01fc7p	/base/culturalevent/event/entity_involved	/m/03b79
/m/02vxq9m	/film/film/release_date_s./film/film_regional_release_date/film_release_region	/m/027rn
/m/03xn3s2	/people/person/gender	/m/02zsn
/m/0fbvqf	/award/award_category/nominees./award/award_nomination/nominated_for	/m/0180mw
/m/099jhq	/award/award_category/nominees./award/award_nomination/nominated_for	/m/03cvvlg
/m/01cyd5	/education/educational_institution/school_type	/m/01rs41
/m/031t2d	/film/film/featured_film_locations	/m/02_286
/m/04n52p6	/film/film/genre	/m/02kdv5l
/m/0g22z	/film/film/cinematography	/m/06r_by
/m/06fmdb	/award/award_winner/awards_won./award/award_honor/award_winner	/m/01m3x5p
/m/01ypc	/baseball/baseball_team/team_stats./baseball/baseball_team_stats/season	/m/02h7s73
/m/0dwt5	/music/performance_role/track_performances./music/track_contribution/role	/m/03q5t
/m/02pxst	/film/film/release_date_s./film/film_regional_release_date/film_release_region	/m/05r4w
/m/03tcbx	/government/legislative_session/members./government/government_position_held/district_represented	/m/03s0w
/m/034zc0	/award/award_nominee/award_nominations./award/award_nomination/award_nominee	/m/01vyv9
/m/0clfdj	/award/award_ceremony/awards_presented./award/award_honor/award_winner	/m/06j8wx
/m/01f39b	/tv/tv_program/regular_cast./tv/regular_tv_appearance/actor	/m/01gn36
/m/02__ww	/film/actor/film./film/performance/film	/m/023gxx
/m/027b9ly	/award/award_category/winners./award/award_honor/award_winner	/m/02kxbx3
/m/05k2xy	/film/film/executive_produced_by	/m/029m83
/m/027dtxw	/award/award_category/nominees./award/award_nomination/nominated_for	/m/07s846j
/m/02bwc7	/award/award_nominee/award_nominations./award/award_nomination/award	/m/0gqmvn
/m/0lx2l	/award/award_nominee/award_nominations./award/award_nomination/award	/m/0279c15
/m/016ggh	/people/person/profession	/m/02hrh1q
/m/02hhtj	/base/popstra/celebrity/canoodled./base/popstra/canoodled/participant	/m/02_hj4
/m/01fwpt	/people/person/profession	/m/02hrh1q
/m/0z4s	/film/actor/film./film/performance/film	/m/035bcl
/m/02x4wr9	/award/award_category/nominees./award/award_nomination/nominated_for	/m/0209xj
/m/05bt6j	/music/genre/artists	/m/09nhvw
/m/03ysmg	/people/person/profession	/m/02jknp
/m/02qfhb	/base/popstra/celebrity/dated./base/popstra/dated/participant	/m/01mqh5
/m/0j8f09z	/film/film/release_date_s./film/film_regional_release_date/film_release_region	/m/06bnz
/m/063lqs	/award/award_winner/awards_won./award/award_honor/award_winner	/m/070m12
/m/04p_hy	/education/educational_institution/school_type	/m/01rs41
/m/025rvx0	/film/film/genre	/m/01j1n2
/m/0dwt5	/music/performance_role/track_performances./music/track_contribution/role	/m/01vj9c
/m/019n9w	/education/educational_institution/students_graduates./education/education/student	/m/016h4r
/m/0827d	/music/genre/artists	/m/01vsy95
/m/04zx3q1	/education/educational_degree/people_with_this_degree./education/education/institution	/m/027kp3
/m/03f2_rc	/award/award_nominee/award_nominations./award/award_nomination/award_nominee	/m/020jqv
/m/0gr42	/award/award_category/nominees./award/award_nomination/nominated_for	/m/01kf3_9
/m/018_lb	/people/person/gender	/m/02zsn
/m/07q1m	/award/award_winning_work/awards_won./award/award_honor/award_winner	/m/026dx
/m/01pkhw	/award/award_nominee/award_nominations./award/award_nomination/nominated_for	/m/0bs5vty
/m/05f4m9q	/award/award_category/winners./award/award_honor/award_winner	/m/0hqly
/m/043hg	/people/person/profession	/m/02hrh1q
/m/0c3p7	/base/popstra/celebrity/dated./base/popstra/dated/participant	/m/01gbn6
/m/01309x	/award/award_nominee/award_nominations./award/award_nomination/award_nominee	/m/01qkqwg
/m/01795t	/award/award_nominee/award_nominations./award/award_nomination/nominated_for	/m/0639bg
/m/01kp66	/people/person/profession	/m/02hrh1q
/m/08jyyk	/music/genre/artists	/m/0274ck
/m/01hkhq	/award/award_winner/awards_won./award/award_honor/award_winner	/m/02tr7d
/m/02r1c18	/film/film/release_date_s./film/film_regional_release_date/film_release_region	/m/03_3d
/m/0jz9f	/organization/organization/headquarters./location/mailing_address/citytown	/m/02_286
/m/0fqyc	/base/aareas/schema/administrative_area/capital	/m/0h095
/m/05yvfd	/people/person/profession	/m/02hrh1q
/m/04ls81	/sports/sports_team/roster./american_football/football_historical_roster_position/position_s	/m/05fyy5
/m/051hrr	/music/performance_role/track_performances./music/track_contribution/role	/m/0dwt5
/m/06lht1	/award/award_nominee/award_nominations./award/award_nomination/nominated_for	/m/01g03q
/m/091yn0	/award/award_nominee/award_nominations./award/award_nomination/award_nominee	/m/07ymr5
/m/014zfs	/award/award_nominee/award_nominations./award/award_nomination/award	/m/019bnn
/m/07fsv	/organization/organization_member/member_of./organization/organization_membership/organization	/m/07t65
/m/02xb2bt	/award/award_nominee/award_nominations./award/award_nomination/nominated_for	/m/0ddd0gc
/m/0h03fhx	/film/film/release_date_s./film/film_regional_release_date/film_release_region	/m/0166b
/m/03hmr_	/people/person/place_of_birth	/m/01_d4
/m/05z7c	/award/ranked_item/appears_in_ranked_lists./award/ranking/list	/m/05glt
/m/02k5sc	/award/award_nominee/award_nominations./award/award_nomination/award_nominee	/m/06mt91
/m/0dc7hc	/film/film/genre	/m/02kdv5l
/m/02896	/sports/professional_sports_team/draft_picks./sports/sports_league_draft_pick/school	/m/0325dj
/m/016clz	/music/genre/artists	/m/01vsnff
/m/01vw20_	/award/award_nominee/award_nominations./award/award_nomination/award	/m/01c427
/m/01_bkd	/music/genre/parent_genre	/m/01243b
/m/017fp	/media_common/netflix_genre/titles	/m/05jzt3
/m/05qg6g	/people/person/gender	/m/02zsn
/m/03h2d4	/award/award_nominee/award_nominations./award/award_nomination/nominated_for	/m/04n52p6
/m/0bxtg	/award/award_winner/awards_won./award/award_honor/award_winner	/m/05hj0n
/m/06j6l	/music/genre/artists	/m/01wk7ql
/m/0c0k1	/people/person/place_of_birth	/m/01_d4
/m/05kwx2	/award/award_nominee/award_nominations./award/award_nomination/award	/m/027dtxw
/m/0jm4b	/sports/sports_team/roster./basketball/basketball_roster_position/position	/m/0ctt4z
/m/0k4p0	/award/award_winning_work/awards_won./award/award_honor/award_winner	/m/029m83
/m/0d1_f	/people/person/gender	/m/02zsn
/m/0n08r	/film/film/genre	/m/0hfjk
/m/0456xp	/base/popstra/celebrity/friendship./base/popstra/friendship/participant	/m/05bnp0
/m/03d0ns	/base/popstra/celebrity/dated./base/popstra/dated/participant	/m/01t07j
/m/03_0p	/award/award_winner/awards_won./award/award_honor/award_winner	/m/0149xx
/m/05qg6g	/people/person/places_lived./people/place_lived/location	/m/027rn
/m/0kjgl	/award/award_nominee/award_nominations./award/award_nomination/nominated_for	/m/02fqxm
/m/01g888	/music/genre/artists	/m/02k5sc
/m/07sc6nw	/film/film/genre	/m/02kdv5l
/m/02d49z	/film/film/genre	/m/01j1n2
/m/02822	/education/field_of_study/students_majoring./education/education/student	/m/0c3p7
/m/0jz9f	/film/film_distributor/films_distributed./film/film_film_distributor_relationship/film	/m/01f8gz
/m/0k3k1	/location/location/contains	/m/0qkcb
/m/02xry	/location/location/contains	/m/0rqf1
/m/06zgc	/olympics/olympic_sport/athletes./olympics/olympic_athlete_affiliation/country	/m/03_3d
/m/01795t	/film/film_distributor/films_distributed./film/film_film_distributor_relationship/film	/m/063fh9
/m/0g5ptf	/film/film/genre	/m/02kdv5l
/m/0mbct	/music/performance_role/track_performances./music/track_contribution/role	/m/011k_j
/m/027dtxw	/award/award_category/winners./award/award_honor/award_winner	/m/016ggh
/m/0dc7hc	/film/film/music	/m/03c_8t
/m/05x8n	/award/award_nominee/award_nominations./award/award_nomination/award	/m/0262yt
/m/0841zn	/soccer/football_player/current_team./sports/sports_team_roster/team	/m/015_z1
/m/0c01c	/people/person/gender	/m/02zsn
/m/0z4s	/film/actor/film./film/performance/film	/m/026gyn_
/m/02tr7d	/award/award_winner/awards_won./award/award_honor/award_winner	/m/03w1v2
/m/07vjm	/education/educational_institution/colors	/m/01l849
/m/015c4g	/award/award_nominee/award_nominations./award/award_nomination/award	/m/04ljl_l
/m/01trhmt	/people/person/profession	/m/02hrh1q
/m/02py4c8	/tv/tv_program/regular_cast./tv/regular_tv_appearance/actor	/m/0159h6
/m/024_vw	/government/politician/government_positions_held./government/government_position_held/legislative_sessions	/m/02bn_p
/m/03j24kf	/award/award_nominee/award_nominations./award/award_nomination/award	/m/01ck6h
/m/03v0t	/location/location/contains	/m/02zd2b
/m/0k3k1	/location/location/contains	/m/01lxw6
/m/01cj6y	/film/actor/film./film/performance/film	/m/02dr9j
/m/0jymd	/film/film/featured_film_locations	/m/02_286
/m/016dgz	/people/person/place_of_birth	/m/02_286
/m/01tnxc	/award/award_nominee/award_nominations./award/award_nomination/nominated_for	/m/04jwly
/m/03m5y9p	/film/film/country	/m/03h64
/m/02x3lt7	/film/film/produced_by	/m/016qtt
/m/0pyg6	/award/award_nominee/award_nominations./award/award_nomination/award	/m/01c9jp
/m/0ct5zc	/film/film/release_date_s./film/film_regional_release_date/film_release_region	/m/03_3d
/m/02yr1q	/education/educational_institution/students_graduates./education/education/major_field_of_study	/m/05qjt
/m/09bymc	/award/award_ceremony/awards_presented./award/award_honor/award_winner	/m/01pcz9
/m/02404v	/award/award_nominee/award_nominations./award/award_nomination/nominated_for	/m/01f8f7
/m/0fbtm7	/sports/sports_team/roster./american_football/football_roster_position/position	/m/02vkdwz
/m/0r4xt	/location/location/time_zones	/m/02lcqs
/m/07kcvl	/sports/sports_team/roster./american_football/football_historical_roster_position/position_s	/m/023wyl
/m/0g768	/music/record_label/artist	/m/0565cz
/m/0gyy0	/film/actor/film./film/performance/film	/m/09sr0
/m/0421v9q	/film/film/release_date_s./film/film_regional_release_date/film_release_region	/m/047lj
/m/04shbh	/celebrities/celebrity/sexual_relationships./celebrities/romantic_relationship/celebrity	/m/014x77
/m/0306ds	/award/award_nominee/award_nominations./award/award_nomination/award_nominee	/m/01kp66
/m/0h95zbp	/film/film/release_date_s./film/film_regional_release_date/film_release_region	/m/03h64
/m/01kb2j	/award/award_nominee/award_nominations./award/award_nomination/award_nominee	/m/0z4s
/m/033srr	/film/film/genre	/m/02kdv5l
/m/05c74	/organization/organization_member/member_of./organization/organization_membership/organization	/m/02vk52z
/m/07s6fsf	/education/educational_degree/people_with_this_degree./education/education/institution	/m/01rc6f
/m/08815	/education/educational_institution/students_graduates./education/education/major_field_of_study	/m/02822
/m/0dp7wt	/award/award_winning_work/awards_won./award/award_honor/award	/m/04ljl_l
/m/0bt4g	/award/award_winning_work/awards_won./award/award_honor/award	/m/0262s1
/m/06q5t7	/base/popstra/celebrity/dated./base/popstra/dated/participant	/m/02pjvc
/m/099jhq	/award/award_category/nominees./award/award_nomination/nominated_for	/m/0btpm6
/m/02qvyrt	/award/award_category/nominees./award/award_nomination/nominated_for	/m/02rn00y
/m/0p0fc	/location/location/time_zones	/m/02hczc
/m/01vs4ff	/music/group_member/membership./music/group_membership/group	/m/06nv27
/m/02z1nbg	/award/award_category/winners./award/award_honor/award_winner	/m/0159h6
/m/04_by	/people/person/gender	/m/02zsn
/m/02bqmq	/government/legislative_session/members./government/government_position_held/legislative_sessions	/m/03tcbx
/m/05qbbfb	/film/film/other_crew./film/film_crew_gig/film_crew_role	/m/033smt
/m/03wjm2	/film/film/executive_produced_by	/m/0282x
/m/08jfkw	/film/actor/film./film/performance/film	/m/09m6kg
/m/089z0z	/people/person/place_of_birth	/m/02_286
/m/0512p	/baseball/baseball_team/team_stats./baseball/baseball_team_stats/season	/m/027mvrc
/m/01wy6	/music/performance_role/regular_performances./music/group_membership/role	/m/0j862
/m/07l50vn	/film/film/release_date_s./film/film_regional_release_date/film_release_region	/m/06bnz
/m/0m63c	/film/film/release_date_s./film/film_regional_release_date/film_release_region	/m/03h64
/m/0h_cssd	/award/award_ceremony/awards_presented./award/award_honor/award_winner	/m/0bytkq
/m/0g5lhl7	/award/award_winner/awards_won./award/award_honor/award_winner	/m/026v1z
/m/0337vz	/award/award_nominee/award_nominations./award/award_nomination/award_nominee	/m/07myb2
/m/01fwk3	/people/person/profession	/m/01445t
/m/0c00zd0	/film/film/other_crew./film/film_crew_gig/film_crew_role	/m/09zzb8
/m/02hxhz	/film/film/featured_film_locations	/m/02_286
/m/012f86	/people/ethnicity/geographic_distribution	/m/06bnz
/m/07xzm	/music/performance_role/regular_performances./music/group_membership/role	/m/01wy6
/m/09rvcvl	/film/film/other_crew./film/film_crew_gig/film_crew_role	/m/09zzb8
/m/01yhm	/baseball/baseball_team/team_stats./baseball/baseball_team_stats/season	/m/02h7s73
/m/05bpg3	/film/actor/film./film/performance/film	/m/05dss7
/m/027dtxw	/award/award_category/nominees./award/award_nomination/nominated_for	/m/0b44shh
/m/02xv8m	/award/award_winner/awards_won./award/award_honor/award_winner	/m/0ksrf8
/m/01ypc	/sports/professional_sports_team/draft_picks./sports/sports_league_draft_pick/school	/m/01pl14
/m/0ksrf8	/award/award_nominee/award_nominations./award/award_nomination/nominated_for	/m/02vqsll
/m/01j5ts	/people/person/gender	/m/02zsn
/m/01l79yc	/people/person/gender	/m/02zsn
/m/0f1nl	/education/educational_institution/colors	/m/01l849
/m/0mw7h	/location/location/adjoin_s./location/adjoining_relationship/adjoins	/m/0mwsh
/m/052gzr	/people/person/profession	/m/02jknp
/m/044rvb	/film/actor/film./film/performance/film	/m/02rlj20
/m/0gj8t_b	/film/film/release_date_s./film/film_regional_release_date/film_release_region	/m/03_3d
/m/0jnb0	/people/person/profession	/m/02jknp
/m/0c9k8	/award/award_winning_work/awards_won./award/award_honor/award_winner	/m/039x1k
/m/02k54	/organization/organization_member/member_of./organization/organization_membership/organization	/m/02vk52z
/m/01zq91	/government/government_office_category/officeholders./government/government_position_held/jurisdiction_of_office	/m/05r4w
/m/02x4wr9	/award/award_category/winners./award/award_honor/award_winner	/m/015c4g
/m/0gr42	/award/award_category/nominees./award/award_nomination/nominated_for	/m/08phg9
/m/05mlqj	/film/actor/film./film/performance/film	/m/0c9t0y
/m/09sr0	/award/award_winning_work/awards_won./award/award_honor/award_winner	/m/021yc7p
/m/016ggh	/award/award_nominee/award_nominations./award/award_nomination/award	/m/027dtxw
/m/07w0v	/education/educational_institution/students_graduates./education/education/student	/m/02sb1w
/m/016clz	/music/genre/artists	/m/012ycy
/m/025s1wg	/film/film/genre	/m/02kdv5l
/m/0cqh6z	/award/award_category/nominees./award/award_nomination/nominated_for	/m/01g03q
/m/02r22gf	/award/award_category/nominees./award/award_nomination/nominated_for	/m/016kz1
/m/033jj1	/people/person/profession	/m/02hrh1q
/m/01kb2j	/people/person/places_lived./people/place_lived/location	/m/0mnyn
/m/016clz	/music/genre/artists	/m/02g40r
/m/0180mw	/tv/tv_program/regular_cast./tv/regular_tv_appearance/actor	/m/014zcr
/m/099c8n	/award/award_category/nominees./award/award_nomination/nominated_for	/m/07s846j
/m/05bpg3	/people/person/profession	/m/02hrh1q
/m/01vvyd8	/people/person/religion	/m/051kv
/m/01pj7	/location/location/contains	/m/0fhzy
/m/09q5w2	/award/award_winning_work/awards_won./award/award_honor/award	/m/099c8n
/m/06n7h7	/award/award_nominee/award_nominations./award/award_nomination/award_nominee	/m/06jvj7
/m/02qwg	/award/award_nominee/award_nominations./award/award_nomination/award	/m/01ck6v
/m/0g1rw	/film/film_distributor/films_distributed./film/film_film_distributor_relationship/film	/m/016fyc
/m/08pc1x	/award/award_ceremony/awards_presented./award/award_honor/award_winner	/m/01nkxvx
/m/02xv8m	/people/person/place_of_birth	/m/0843m
/m/01mqh5	/film/actor/film./film/performance/film	/m/0n6ds
/m/070w7s	/award/award_nominee/award_nominations./award/award_nomination/award_nominee	/m/026n998
/m/04fjzv	/film/film/release_date_s./film/film_regional_release_date/film_release_region	/m/05r4w
/m/04rs03	/people/person/profession	/m/02hrh1q
/m/09gkx35	/film/film/film_festivals	/m/0fpkxfd
/m/0fkvn	/government/government_office_category/officeholders./government/government_position_held/jurisdiction_of_office	/m/018jmn
/m/012x2b	/film/actor/film./film/performance/film	/m/08phg9
/m/09d6p2	/business/job_title/people_with_this_title./business/employment_tenure/company	/m/08z129
/m/036jp8	/people/person/sibling_s./people/sibling_relationship/sibling	/m/02j4sk
/m/0f63n	/location/location/adjoin_s./location/adjoining_relationship/adjoins	/m/0fpn8
/m/05ry0p	/people/person/profession	/m/02hrh1q
/m/0yc7f	/location/hud_county_place/county	/m/0cymp
/m/0l4vc	/base/biblioness/bibs_location/state	/m/05tbn
/m/0d1_f	/government/politician/government_positions_held./government/government_position_held/jurisdiction_of_office	/m/0l3h
/m/0159h6	/award/award_nominee/award_nominations./award/award_nomination/nominated_for	/m/0bm2nq
/m/03q5t	/music/performance_role/track_performances./music/track_contribution/role	/m/01vj9c
/m/01243b	/music/genre/artists	/m/01s560x
/m/017j69	/education/educational_institution/students_graduates./education/education/student	/m/074tb5
/m/0p_2r	/award/award_nominee/award_nominations./award/award_nomination/award	/m/0fc9js
/m/047g8h	/sports/sports_position/players./sports/sports_team_roster/team	/m/025_64l
/m/0pyg6	/award/award_nominee/award_nominations./award/award_nomination/award_nominee	/m/03_2td
/m/016k62	/award/award_nominee/award_nominations./award/award_nomination/award_nominee	/m/03_0p
/m/04q01mn	/film/film/genre	/m/0219x_
/m/01gkg3	/education/educational_degree/people_with_this_degree./education/education/major_field_of_study	/m/0w7c
/m/01pgzn_	/people/person/place_of_birth	/m/02_286
/m/065b6q	/people/ethnicity/people	/m/016h4r
/m/01pj5q	/award/award_nominee/award_nominations./award/award_nomination/award	/m/02x73k6
/m/02sb1w	/award/award_winner/awards_won./award/award_honor/award_winner	/m/040981l
/m/07c0j	/influence/influence_node/influenced_by	/m/02jq1
/m/07ss8_	/award/award_nominee/award_nominations./award/award_nomination/award_nominee	/m/01wgxtl
/m/0k_kr	/music/record_label/artist	/m/048xh
/m/05_wyz	/business/job_title/people_with_this_title./business/employment_tenure/company	/m/019rl6
/m/07sc6nw	/film/film/other_crew./film/film_crew_gig/film_crew_role	/m/09zzb8
/m/07ss8_	/award/award_nominee/award_nominations./award/award_nomination/award	/m/063y_ky
/m/085h1	/user/ktrueman/default_domain/international_organization/member_states	/m/019rg5
/m/0l12d	/people/person/profession	/m/02hrh1q
/m/0dp7wt	/film/film/story_by	/m/03hnd
/m/02184q	/people/person/profession	/m/02hrh1q
/m/0nvt9	/location/location/adjoin_s./location/adjoining_relationship/adjoins	/m/0nvd8
/m/0jz9f	/film/film_distributor/films_distributed./film/film_film_distributor_relationship/film	/m/083shs
/m/0cxn2	/food/food/nutrients./food/nutrition_fact/nutrient	/m/09gwd
/m/06w99h3	/film/film/genre	/m/02kdv5l
/m/025mb_	/people/person/gender	/m/02zsn
/m/02pt6k_	/award/award_nominee/award_nominations./award/award_nomination/award_nominee	/m/06jvj7
/m/07h1q	/user/alexander/philosophy/philosopher/interests	/m/0x0w
/m/02x3lt7	/film/film/genre	/m/02b5_l
/m/041jlr	/influence/influence_node/influenced_by	/m/07h1q
/m/023gxx	/film/film/genre	/m/017fp
/m/023s8	/people/person/places_lived./people/place_lived/location	/m/04ykg
/m/02d49z	/film/film/language	/m/05zjd
/m/02x8m	/music/genre/artists	/m/015x1f
/m/0ct5zc	/film/film/release_date_s./film/film_regional_release_date/film_release_region	/m/05r4w
/m/02py8_w	/sports/sports_team/sport	/m/039yzs
/m/027dtv3	/award/award_nominee/award_nominations./award/award_nomination/award_nominee	/m/03w1v2
/m/01gtcc	/government/legislative_session/members./government/government_position_held/legislative_sessions	/m/01gtc0
/m/03d1y3	/people/person/profession	/m/02jknp
/m/01vyv9	/people/person/place_of_birth	/m/0f2s6
/m/0gsg7	/tv/tv_network/programs./tv/tv_network_duration/program	/m/030k94
/m/0bscw	/film/film/produced_by	/m/0d_skg
/m/07qht4	/media_common/netflix_genre/titles	/m/02wyzmv
/m/01f8gz	/film/film/runtime./film/film_cut/film_release_region	/m/03h64
/m/01wyz92	/base/popstra/celebrity/friendship./base/popstra/friendship/participant	/m/01vz0g4
/m/01m24m	/location/hud_county_place/county	/m/0m2j5
/m/0c3p7	/award/award_nominee/award_nominations./award/award_nomination/award_nominee	/m/01kp66
/m/043cl9	/people/person/profession	/m/02hrh1q
/m/023rwm	/music/record_label/artist	/m/01dpts
/m/08p1gp	/people/person/gender	/m/02zsn
/m/0c408_	/award/award_nominee/award_nominations./award/award_nomination/award_nominee	/m/03bx_5q
/m/0h1p	/people/person/nationality	/m/06f32
/m/0dzf_	/celebrities/celebrity/celebrity_friends./celebrities/friendship/friend	/m/0jrny
/m/0ddbjy4	/film/film/other_crew./film/film_crew_gig/film_crew_role	/m/02rh1dz
/m/01kb2j	/award/award_nominee/award_nominations./award/award_nomination/award_nominee	/m/017149
/m/01lct6	/award/award_nominee/award_nominations./award/award_nomination/nominated_for	/m/039cq4
/m/0ymff	/education/educational_institution/students_graduates./education/education/major_field_of_study	/m/04rjg
/m/01t07j	/people/person/profession	/m/02jknp
/m/03_wvl	/award/award_nominee/award_nominations./award/award_nomination/award_nominee	/m/01sl1q
/m/01_d4	/location/location/adjoin_s./location/adjoining_relationship/adjoins	/m/04kcn
/m/0c6g29	/people/deceased_person/place_of_death	/m/0r62v
/m/0dwt5	/music/performance_role/regular_performances./music/group_membership/group	/m/0b_xm
/m/0cjsxp	/award/award_nominee/award_nominations./award/award_nomination/award_nominee	/m/02sb1w
/m/099c8n	/award/award_category/nominees./award/award_nomination/nominated_for	/m/0ds3t5x
/m/01w03jv	/people/person/places_lived./people/place_lived/location	/m/0ncj8
/m/04gvt5	/people/person/places_lived./people/place_lived/location	/m/02_286
/m/026rm_y	/award/award_nominee/award_nominations./award/award_nomination/award	/m/057xs89
/m/0hfjk	/media_common/netflix_genre/titles	/m/0n08r
/m/0d810y	/award/award_nominee/award_nominations./award/award_nomination/nominated_for	/m/02rzdcp
/m/03j90	/people/person/place_of_birth	/m/05mwx
/m/0kq08	/location/location/time_zones	/m/02lcqs
/m/074tb5	/people/person/profession	/m/02hrh1q
/m/0209xj	/award/award_winning_work/awards_won./award/award_honor/award	/m/02x4w6g
/m/01ycbq	/film/actor/film./film/performance/film	/m/011yth
/m/059gkk	/award/award_winner/awards_won./award/award_honor/award_winner	/m/02lg9w
/m/051q5	/american_football/football_team/current_roster./sports/sports_team_roster/position	/m/047g8h
/m/01f6zc	/film/actor/film./film/performance/film	/m/09sr0
/m/07tk7	/education/educational_institution/students_graduates./education/education/major_field_of_study	/m/04rjg
/m/053ksp	/people/person/profession	/m/02hrh1q
/m/03wbqc4	/film/film/other_crew./film/film_crew_gig/film_crew_role	/m/09zzb8
/m/018wdw	/award/award_category/nominees./award/award_nomination/nominated_for	/m/02kfzz
/m/043vc	/sports/sports_team/roster./american_football/football_roster_position/position	/m/02g_6x
/m/05bt6j	/music/genre/artists	/m/027kwc
/m/02x8m	/music/genre/artists	/m/024qwq
/m/02822	/education/field_of_study/students_majoring./education/education/student	/m/012x2b
/m/0d1_f	/government/politician/government_positions_held./government/government_position_held/jurisdiction_of_office	/m/07fsv
/m/01h5f8	/people/person/profession	/m/018gz8
/m/0f1vrl	/people/person/places_lived./people/place_lived/location	/m/0f2s6
/m/09hd6f	/award/award_winner/awards_won./award/award_honor/award_winner	/m/06jrhz
/m/01gbn6	/award/award_nominee/award_nominations./award/award_nomination/nominated_for	/m/0bcp9b
/m/053vcrp	/film/film_set_designer/film_sets_designed	/m/04v8x9
/m/01vwllw	/film/actor/film./film/performance/film	/m/06cgf
/m/016gr2	/award/award_nominee/award_nominations./award/award_nomination/award_nominee	/m/02tr7d
/m/024rgt	/award/award_nominee/award_nominations./award/award_nomination/nominated_for	/m/0dp7wt
/m/03t22m	/music/performance_role/guest_performances./music/recording_contribution/performance_role	/m/01wy6
/m/02qwg	/award/award_nominee/award_nominations./award/award_nomination/award_nominee	/m/03j24kf
/m/016clz	/music/genre/artists	/m/06br6t
/m/061zc_	/people/person/places_lived./people/place_lived/location	/m/029kpy
/m/04954	/award/award_nominee/award_nominations./award/award_nomination/award	/m/0cqh46
/m/06q8hf	/people/person/employment_history./business/employment_tenure/company	/m/0jz9f
/m/057xs89	/award/award_category/winners./award/award_honor/award_winner	/m/0lx2l
/m/0337vz	/people/person/place_of_birth	/m/01_d4
/m/05l2z4	/government/legislative_session/members./government/government_position_held/legislative_sessions	/m/02bn_p
/m/04bd8y	/film/actor/film./film/performance/film	/m/09rvwmy
/m/05bt6j	/music/genre/artists	/m/02jq1
/m/03v0t	/location/location/contains	/m/0sf9_
/m/01vrt_c	/award/award_winner/awards_won./award/award_honor/award_winner	/m/0qdyf
/m/03_3d	/location/location/contains	/m/018jkl
/m/027y151	/award/award_nominee/award_nominations./award/award_nomination/award	/m/02r22gf
/m/0glt670	/music/genre/artists	/m/01wcp_g
/m/0bxtg	/award/award_nominee/award_nominations./award/award_nomination/award_nominee	/m/0c4f4
/m/0n6f8	/film/actor/film./film/performance/film	/m/03z20c
/m/04f6hhm	/tv/tv_program/genre	/m/01htzx
/m/03rl1g	/government/legislative_session/members./government/government_position_held/district_represented	/m/03s0w
/m/02xry	/location/location/contains	/m/0fxkr
/m/05bnp0	/award/award_nominee/award_nominations./award/award_nomination/award	/m/0cqh46
/m/02q7fl9	/film/film/production_companies	/m/01gb54
/m/06ns98	/award/award_nominee/award_nominations./award/award_nomination/nominated_for	/m/0ddd0gc
/m/09pj68	/award/award_ceremony/awards_presented./award/award_honor/award_winner	/m/046m59
/m/01jrp0	/people/person/gender	/m/02zsn
/m/0f7hc	/award/award_nominee/award_nominations./award/award_nomination/award	/m/05f4m9q
/m/04lhc4	/award/award_winning_work/awards_won./award/award_honor/award	/m/02z1nbg
/m/0gr42	/award/award_category/nominees./award/award_nomination/nominated_for	/m/09q5w2
/m/0dk0dj	/tv/tv_program/program_creator	/m/03jl0_
/m/07c6l	/music/instrument/instrumentalists	/m/0146pg
