# Supplementary material
Source: ML conference proceedings conference paper supplement (https://proceedings.neurips.cc/paper_files/paper/2021/hash/0fd600c953cde8121262e322ef09f70e-Abstract.html)
Supplement: Supplementary file 1 [file 0fd600c953cde8121262e322ef09f70e-Supplemental.zip › Supplementary_Material_Paper_8745/data/GraIL-BM_fb237_v3/test/test-graph.txt]

/m/01clyr	/music/record_label/artist	/m/0mjn2
/m/03h64	/media_common/netflix_genre/titles	/m/08j7lh
/m/0clfdj	/award/award_ceremony/awards_presented./award/award_honor/award_winner	/m/05bnp0
/m/03ckfl9	/music/genre/artists	/m/048xh
/m/05wh0sh	/influence/influence_node/influenced_by	/m/048cl
/m/09hnb	/award/award_winner/awards_won./award/award_honor/award_winner	/m/01vvlyt
/m/05g2v	/location/location/partially_contains	/m/02k54
/m/02x8m	/music/genre/artists	/m/012z8_
/m/02x73k6	/award/award_category/nominees./award/award_nomination/nominated_for	/m/02lxrv
/m/09tqkv2	/film/film/genre	/m/01t_vv
/m/026c1	/people/person/profession	/m/02jknp
/m/07xzm	/music/performance_role/regular_performances./music/group_membership/role	/m/0dwtp
/m/017v3q	/education/educational_institution/colors	/m/01l849
/m/01h5f8	/award/award_nominee/award_nominations./award/award_nomination/award	/m/02ddqh
/m/05nw9m	/people/person/profession	/m/02hrh1q
/m/0n4z2	/location/location/adjoin_s./location/adjoining_relationship/adjoins	/m/0n56v
/m/0g5qmbz	/film/film/release_date_s./film/film_regional_release_date/film_release_region	/m/03h64
/m/016ggh	/award/award_nominee/award_nominations./award/award_nomination/nominated_for	/m/011yl_
/m/07s6fsf	/education/educational_degree/people_with_this_degree./education/education/institution	/m/07w0v
/m/0hfjk	/media_common/netflix_genre/titles	/m/0f4k49
/m/0py9b	/business/business_operation/industry	/m/03ytc
/m/02z1nbg	/award/award_category/winners./award/award_honor/award_winner	/m/01dbhb
/m/06ztvyx	/film/film/executive_produced_by	/m/063b4k
/m/04lqvlr	/film/film/other_crew./film/film_crew_gig/film_crew_role	/m/09zzb8
/m/01mv_n	/people/person/profession	/m/018gz8
/m/03f2_rc	/people/person/profession	/m/02jknp
/m/01l3mk3	/award/award_nominee/award_nominations./award/award_nomination/award_nominee	/m/03f2_rc
/m/02fbb5	/sports/sports_team/sport	/m/09xp_
/m/0z4s	/film/actor/film./film/performance/film	/m/034b6k
/m/01kp66	/film/actor/film./film/performance/film	/m/02d49z
/m/0h0jz	/award/award_winner/awards_won./award/award_honor/award_winner	/m/01wz01
/m/03kdl	/people/person/places_lived./people/place_lived/location	/m/03s0w
/m/02x4wr9	/award/award_category/nominees./award/award_nomination/nominated_for	/m/0b44shh
/m/02wh75	/award/award_category/winners./award/award_honor/award_winner	/m/0lbj1
/m/05cc1	/organization/organization_member/member_of./organization/organization_membership/organization	/m/02vk52z
/m/0fy34l	/award/award_winning_work/awards_won./award/award_honor/honored_for	/m/02q7fl9
/m/0fpv_3_	/film/film/release_date_s./film/film_regional_release_date/film_release_region	/m/05c74
/m/02x4w6g	/award/award_category/nominees./award/award_nomination/nominated_for	/m/02prw4h
/m/0pyww	/people/person/places_lived./people/place_lived/location	/m/0bxbr
/m/07663r	/people/person/gender	/m/02zsn
/m/0cbkc	/people/person/languages	/m/04306rv
/m/06151l	/award/award_nominee/award_nominations./award/award_nomination/award_nominee	/m/07ncs0
/m/08phg9	/film/film/genre	/m/02kdv5l
/m/0sw0q	/tv/tv_program/regular_cast./tv/regular_tv_appearance/actor	/m/06nd8c
/m/04xm_	/people/deceased_person/place_of_death	/m/02h6_6p
/m/06f32	/organization/organization_member/member_of./organization/organization_membership/organization	/m/07t65
/m/03jl0_	/organization/organization/child./organization/organization_relationship/child	/m/07vj4v
/m/0275kr	/tv/tv_program/regular_cast./tv/regular_tv_appearance/actor	/m/016dgz
/m/02x73k6	/award/award_category/winners./award/award_honor/award_winner	/m/01ycbq
/m/01fmys	/film/film/music	/m/0146pg
/m/02k13d	/tv/non_character_role/tv_regular_personal_appearances./tv/tv_regular_personal_appearance/person	/m/01k70_
/m/01gkmx	/film/actor/film./film/performance/film	/m/01chpn
/m/02mpyh	/award/award_winning_work/awards_won./award/award_honor/award	/m/027dtxw
/m/08cn_n	/people/person/profession	/m/02jknp
/m/0n08r	/film/film/other_crew./film/film_crew_gig/film_crew_role	/m/09zzb8
/m/02cx90	/award/award_winner/awards_won./award/award_honor/award_winner	/m/01309x
/m/05tbn	/location/location/contains	/m/02yr3z
/m/0h1p	/film/director/film	/m/01mgw
/m/016dgz	/award/award_nominee/award_nominations./award/award_nomination/nominated_for	/m/09qycb
/m/01mhwk	/award/award_ceremony/awards_presented./award/award_honor/award_winner	/m/0411q
/m/0gh8zks	/film/film/release_date_s./film/film_regional_release_date/film_release_region	/m/03h64
/m/02q7fl9	/film/film/other_crew./film/film_crew_gig/crewmember	/m/02q9kqf
/m/0k_kr	/music/record_label/artist	/m/0k7pf
/m/0bdxs5	/celebrities/celebrity/celebrity_friends./celebrities/friendship/friend	/m/03xnq9_
/m/02r22gf	/award/award_category/nominees./award/award_nomination/nominated_for	/m/09r94m
/m/063y_ky	/award/award_category/nominees./award/award_nomination/nominated_for	/m/0qf2t
/m/0lx2l	/film/actor/film./film/performance/film	/m/03lrht
/m/050zr4	/people/person/places_lived./people/place_lived/location	/m/01_d4
/m/01tnxc	/award/award_winner/awards_won./award/award_honor/award_winner	/m/07h565
/m/07z2lx	/award/award_category/nominees./award/award_nomination/nominated_for	/m/02qjv1p
/m/01wsl7c	/people/person/places_lived./people/place_lived/location	/m/02m77
/m/03cp4cn	/film/film/film_festivals	/m/09rwjly
/m/018t8f	/education/educational_institution/school_type	/m/01rs41
/m/0gyfp9c	/award/award_winning_work/awards_won./award/award_honor/award	/m/02x4w6g
/m/01gtdd	/government/legislative_session/members./government/government_position_held/legislative_sessions	/m/03rl1g
/m/0dx8gj	/film/film/produced_by	/m/0h1p
/m/0gj8t_b	/film/film/release_date_s./film/film_regional_release_date/film_release_region	/m/06f32
/m/01gb54	/film/film_distributor/films_distributed./film/film_film_distributor_relationship/film	/m/02phtzk
/m/09fc83	/tv/tv_program/regular_cast./tv/regular_tv_appearance/actor	/m/02ldv0
/m/03_3d	/location/location/contains	/m/017t44
/m/02r22gf	/award/award_category/nominees./award/award_nomination/nominated_for	/m/03y0pn
/m/0bksh	/people/person/gender	/m/02zsn
/m/0kb57	/film/film/genre	/m/017fp
/m/02vxq9m	/film/film/production_companies	/m/0g1rw
/m/02r1c18	/film/film/production_companies	/m/02j_j0
/m/0j6b5	/film/film/release_date_s./film/film_regional_release_date/film_release_region	/m/01pj7
/m/02624g	/film/actor/film./film/performance/film	/m/063fh9
/m/01m3x5p	/people/person/profession	/m/02hrh1q
/m/026v437	/award/award_nominee/award_nominations./award/award_nomination/award_nominee	/m/02sb1w
/m/01trhmt	/film/actor/film./film/performance/film	/m/01svry
/m/03rz2b	/film/film/genre	/m/0219x_
/m/09728	/food/food/nutrients./food/nutrition_fact/nutrient	/m/025sqz8
/m/0sxdg	/organization/organization/headquarters./location/mailing_address/citytown	/m/02_286
/m/04ljl_l	/award/award_category/nominees./award/award_nomination/nominated_for	/m/02kfzz
/m/02r22gf	/award/award_category/nominees./award/award_nomination/nominated_for	/m/02fqrf
/m/0gqng	/award/award_category/winners./award/award_honor/ceremony	/m/0bzkgg
/m/03f4n1	/military/military_combatant/military_conflicts./military/military_combatant_group/combatants	/m/017v_
/m/0g4vmj8	/film/film/genre	/m/02kdv5l
/m/02m501	/award/award_nominee/award_nominations./award/award_nomination/award	/m/0279c15
/m/01fmys	/film/film/genre	/m/0bj8m2
/m/04n52p6	/film/film/other_crew./film/film_crew_gig/film_crew_role	/m/09zzb8
/m/02g3ft	/award/award_category/nominees./award/award_nomination/nominated_for	/m/06r2h
/m/015gy7	/award/award_nominee/award_nominations./award/award_nomination/nominated_for	/m/015gm8
/m/06mnbn	/award/award_nominee/award_nominations./award/award_nomination/award_nominee	/m/0356dp
/m/022r38	/education/educational_institution/school_type	/m/01rs41
/m/0fbw6	/food/food/nutrients./food/nutrition_fact/nutrient	/m/025s0zp
/m/0f7hc	/base/popstra/celebrity/friendship./base/popstra/friendship/participant	/m/016_mj
/m/09m6kg	/film/film/genre	/m/0jtdp
/m/01mh8zn	/people/person/profession	/m/02hrh1q
/m/0pyg6	/film/actor/film./film/performance/film	/m/02x3lt7
/m/01swck	/award/award_winner/awards_won./award/award_honor/award_winner	/m/016khd
/m/017fp	/media_common/netflix_genre/titles	/m/06krf3
/m/04zwc	/organization/endowed_organization/endowment./measurement_unit/dated_money_value/currency	/m/0kz1h
/m/02mpyh	/film/film/other_crew./film/film_crew_gig/film_crew_role	/m/0263ycg
/m/02yv6b	/music/genre/artists	/m/01vw20_
/m/012vd6	/influence/influence_node/influenced_by	/m/03f3_p3
/m/0d193h	/award/award_nominee/award_nominations./award/award_nomination/award	/m/02wh75
/m/03d0ns	/people/person/profession	/m/02jknp
/m/0blg2	/olympics/olympic_games/sports	/m/06wrt
/m/02ldkf	/organization/organization/headquarters./location/mailing_address/state_province_region	/m/05fkf
/m/0fqyc	/location/location/contains	/m/0h095
/m/02bf2s	/people/person/profession	/m/01445t
/m/0gk7z	/education/educational_institution/students_graduates./education/education/major_field_of_study	/m/02822
/m/099c8n	/award/award_category/nominees./award/award_nomination/nominated_for	/m/0462hhb
/m/047rkcm	/film/film/produced_by	/m/059x0w
/m/01vsy7t	/award/award_nominee/award_nominations./award/award_nomination/award_nominee	/m/01kx_81
/m/01wy6	/music/performance_role/track_performances./music/track_contribution/role	/m/0dwvl
/m/03hvk2	/education/educational_institution/school_type	/m/01rs41
/m/01s21dg	/base/popstra/celebrity/dated./base/popstra/dated/participant	/m/0bksh
/m/0jqp3	/film/film/produced_by	/m/0170vn
/m/0c0k1	/people/person/spouse_s./people/marriage/spouse	/m/023s8
/m/0g10g	/people/person/profession	/m/01p5_g
/m/02yxjs	/organization/organization/headquarters./location/mailing_address/state_province_region	/m/03v0t
/m/02hmw9	/education/educational_institution/students_graduates./education/education/student	/m/07b2lv
/m/07y9w5	/film/film/other_crew./film/film_crew_gig/film_crew_role	/m/09zzb8
/m/02vxq9m	/film/film/release_date_s./film/film_regional_release_date/film_release_region	/m/03_3d
/m/0bksh	/celebrities/celebrity/celebrity_friends./celebrities/friendship/friend	/m/03_x5t
/m/02ddqh	/award/award_category/winners./award/award_honor/ceremony	/m/01mhwk
/m/03f2_rc	/award/award_nominee/award_nominations./award/award_nomination/award_nominee	/m/07c0j
/m/0257wh	/award/award_category/winners./award/award_honor/ceremony	/m/01mhwk
/m/0cpz4k	/tv/tv_program/genre	/m/09lmb
/m/0gg4h	/people/cause_of_death/people	/m/044qx
/m/05ldnp	/people/person/place_of_birth	/m/0b1t1
/m/0pyww	/people/person/gender	/m/02zsn
/m/05gnf	/award/award_winner/awards_won./award/award_honor/award_winner	/m/091yn0
/m/01sp81	/award/award_nominee/award_nominations./award/award_nomination/award_nominee	/m/01hkhq
/m/01x4sb	/award/award_nominee/award_nominations./award/award_nomination/award_nominee	/m/0dgskx
/m/04shbh	/base/popstra/celebrity/dated./base/popstra/dated/participant	/m/0456xp
/m/02qny_	/soccer/football_player/current_team./sports/sports_team_roster/team	/m/01k2xy
/m/012dtf	/base/popstra/celebrity/canoodled./base/popstra/canoodled/participant	/m/04nw9
/m/03xnwz	/music/genre/artists	/m/06br6t
/m/01795t	/film/film_distributor/films_distributed./film/film_film_distributor_relationship/film	/m/02x3lt7
/m/09h4b5	/film/actor/film./film/performance/film	/m/02d49z
/m/03w1v2	/award/award_winner/awards_won./award/award_honor/award_winner	/m/026v437
/m/01fwpt	/film/actor/film./film/performance/film	/m/04g73n
/m/0b44shh	/film/film/release_date_s./film/film_regional_release_date/film_release_region	/m/01pj7
/m/05z7c	/award/award_nominated_work/award_nominations./award/award_nomination/nominated_for	/m/01jr4j
/m/0639bg	/award/award_winning_work/awards_won./award/award_honor/award	/m/02r0csl
/m/011yth	/film/film/other_crew./film/film_crew_gig/film_crew_role	/m/09zzb8
/m/04zx3q1	/education/educational_degree/people_with_this_degree./education/education/institution	/m/0f1nl
/m/0bdxs5	/award/award_nominee/award_nominations./award/award_nomination/nominated_for	/m/02x3lt7
/m/0f4yh	/film/film/music	/m/0146pg
/m/0s6g4	/base/biblioness/bibs_location/state	/m/03v0t
/m/09q5w2	/award/award_winning_work/awards_won./award/award_honor/award_winner	/m/018db8
/m/017v_	/location/location/contains	/m/0d58_
/m/03558l	/sports/sports_position/players./sports/sports_team_roster/team	/m/0jm3b
/m/026f__m	/film/film/other_crew./film/film_crew_gig/film_crew_role	/m/09zzb8
/m/03v1s	/location/location/adjoin_s./location/adjoining_relationship/adjoins	/m/01_d4
/m/02yv6b	/music/genre/artists	/m/025ldg
/m/078jnn	/people/person/gender	/m/02zsn
/m/090gk3	/people/person/profession	/m/02hrh1q
/m/01738f	/music/genre/artists	/m/0xsk8
/m/0159h6	/film/actor/film./film/performance/film	/m/02py4c8
/m/02xwgr	/film/actor/film./film/performance/film	/m/06z8s_
/m/0hm4q	/organization/role/leaders./organization/leadership/organization	/m/02pbzv
/m/0jz9f	/award/award_nominee/award_nominations./award/award_nomination/nominated_for	/m/011ypx
/m/02qrv7	/award/award_nominated_work/award_nominations./award/award_nomination/nominated_for	/m/01kf3_9
/m/09v42sf	/film/film/release_date_s./film/film_regional_release_date/film_release_region	/m/03_3d
/m/01p8s	/location/location/adjoin_s./location/adjoining_relationship/adjoins	/m/05c74
/m/0fgg8c	/sports/sports_team/roster./american_football/football_historical_roster_position/position_s	/m/047g8h
/m/03h2d4	/film/actor/film./film/performance/film	/m/04n52p6
/m/02vk52z	/base/schemastaging/organization_extra/phone_number./base/schemastaging/phone_sandbox/contact_category	/m/014dgf
/m/0b44shh	/award/award_winning_work/awards_won./award/award_honor/award_winner	/m/01ycbq
/m/02hsq3m	/award/award_category/nominees./award/award_nomination/nominated_for	/m/03q5db
/m/04vjh	/organization/organization_member/member_of./organization/organization_membership/organization	/m/0b6css
/m/03rl1g	/government/legislative_session/members./government/government_position_held/district_represented	/m/07_f2
/m/0456xp	/base/popstra/celebrity/canoodled./base/popstra/canoodled/participant	/m/04shbh
/m/02yr1q	/education/educational_institution/students_graduates./education/education/student	/m/05bpg3
/m/0dc7hc	/film/film/genre	/m/0vjs6
/m/0cjsxp	/award/award_winner/awards_won./award/award_honor/award_winner	/m/03w1v2
/m/0j3d9tn	/film/film/release_date_s./film/film_regional_release_date/film_release_region	/m/06f32
/m/0pyg6	/people/person/places_lived./people/place_lived/location	/m/02_286
/m/0f13b	/people/person/profession	/m/02jknp
/m/03hmr_	/people/person/profession	/m/02hrh1q
/m/02bn_p	/government/legislative_session/members./government/government_position_held/district_represented	/m/03v0t
/m/0gys2jp	/film/film/release_date_s./film/film_regional_release_date/film_release_region	/m/02_286
/m/05bnp0	/people/person/profession	/m/02jknp
/m/07dzf	/organization/organization_member/member_of./organization/organization_membership/organization	/m/0b6css
/m/01vsy7t	/film/actor/film./film/performance/film	/m/01shy7
/m/01shy7	/film/film/release_date_s./film/film_regional_release_date/film_release_region	/m/03h64
/m/099c8n	/award/award_category/nominees./award/award_nomination/nominated_for	/m/02mpyh
/m/0lkr7	/award/award_nominee/award_nominations./award/award_nomination/award	/m/02x4w6g
/m/0dwtp	/music/performance_role/regular_performances./music/group_membership/role	/m/051hrr
/m/02_qt	/film/film/country	/m/03_3d
/m/0c33pl	/award/award_nominee/award_nominations./award/award_nomination/award_nominee	/m/01xcr4
/m/01swck	/film/actor/film./film/performance/film	/m/05zlld0
/m/0dwt5	/music/performance_role/track_performances./music/track_contribution/role	/m/011k_j
/m/01wyz92	/base/popstra/celebrity/canoodled./base/popstra/canoodled/participant	/m/016pns
/m/07xzm	/music/performance_role/regular_performances./music/group_membership/role	/m/0l14v3
/m/02_hj4	/people/person/place_of_birth	/m/02_286
/m/01gb54	/film/film_distributor/films_distributed./film/film_film_distributor_relationship/film	/m/0ds3t5x
/m/09p2r9	/award/award_ceremony/awards_presented./award/award_honor/award_winner	/m/0dzf_
/m/015wc0	/people/deceased_person/place_of_death	/m/0284jb
/m/06k176	/tv/tv_program/genre	/m/01htzx
/m/0n6ds	/film/film/other_crew./film/film_crew_gig/film_crew_role	/m/09zzb8
/m/02kxbx3	/people/person/places_lived./people/place_lived/location	/m/02_286
/m/0gjcrrw	/film/film/executive_produced_by	/m/06q8hf
/m/04ykg	/location/statistical_region/religions./location/religion_percentage/religion	/m/051kv
/m/02x8m	/music/genre/artists	/m/01wzlxj
/m/02g_6x	/sports/sports_position/players./sports/sports_team_roster/team	/m/0f24cc
/m/08pth9	/people/person/profession	/m/02hrh1q
/m/01_bkd	/music/genre/artists	/m/03lgg
/m/0264jc6	/music/genre/artists	/m/06br6t
/m/027b9k6	/award/award_category/winners./award/award_honor/award_winner	/m/01kb2j
/m/0n56v	/location/location/time_zones	/m/02hczc
/m/0xc9x	/location/location/time_zones	/m/02lcqs
/m/0m32h	/people/cause_of_death/people	/m/02v2jy
/m/016ggh	/film/actor/film./film/performance/film	/m/02rq8k8
/m/03w4sh	/award/award_nominee/award_nominations./award/award_nomination/award_nominee	/m/038g2x
/m/01clyr	/music/record_label/artist	/m/0411q
/m/047q2wc	/award/award_winner/awards_won./award/award_honor/award_winner	/m/06n7h7
/m/01_sz1	/music/genre/artists	/m/01vrt_c
/m/0k3p	/base/popstra/location/vacationers./base/popstra/vacation_choice/vacationer	/m/01s21dg
/m/06fxnf	/people/person/profession	/m/01c8w0
/m/070px	/people/person/profession	/m/02hrh1q
/m/01fx4k	/film/film/story_by	/m/0c1fs
/m/0h63gl9	/film/film/release_date_s./film/film_regional_release_date/film_release_region	/m/06bnz
/m/0j6b5	/film/film/release_date_s./film/film_regional_release_date/film_release_region	/m/05r4w
/m/0pyg6	/people/person/profession	/m/02hrh1q
/m/02x4w6g	/award/award_category/nominees./award/award_nomination/nominated_for	/m/02_06s
/m/0dk0dj	/tv/tv_program/genre	/m/02kdv5l
/m/01q9b9	/people/person/places_lived./people/place_lived/location	/m/06wxw
/m/01v8y9	/music/performance_role/track_performances./music/track_contribution/role	/m/07xzm
/m/01vvlyt	/award/award_nominee/award_nominations./award/award_nomination/award_nominee	/m/01vrt_c
/m/02896	/sports/professional_sports_team/draft_picks./sports/sports_league_draft_pick/school	/m/01rc6f
/m/07nf6	/location/location/adjoin_s./location/adjoining_relationship/adjoins	/m/09krp
/m/024rgt	/film/film_distributor/films_distributed./film/film_film_distributor_relationship/film	/m/035s95
/m/02ddq4	/award/award_category/winners./award/award_honor/ceremony	/m/056878
/m/047sgz4	/award/award_category/winners./award/award_honor/award_winner	/m/0146pg
/m/01hkhq	/award/award_winner/awards_won./award/award_honor/award_winner	/m/06j8wx
/m/0gh6j94	/film/film/release_date_s./film/film_regional_release_date/film_release_region	/m/06f32
/m/03ys2f	/people/person/profession	/m/02jknp
/m/0pyww	/people/person/places_lived./people/place_lived/location	/m/02_286
/m/01f7v_	/film/director/film	/m/027m67
/m/016gr2	/award/award_winner/awards_won./award/award_honor/award_winner	/m/01sp81
/m/06l9n8	/film/actor/film./film/performance/film	/m/02prw4h
/m/0pyww	/award/award_nominee/award_nominations./award/award_nomination/award	/m/09qs08
/m/0k4p0	/film/film/written_by	/m/098n5
/m/04vh83	/film/film/genre	/m/082gq
/m/017l96	/music/record_label/artist	/m/01wkmgb
/m/05ldnp	/people/person/religion	/m/06nzl
/m/0cqh6z	/award/award_category/nominees./award/award_nomination/nominated_for	/m/0ddd0gc
/m/03bdm4	/people/person/profession	/m/02hrh1q
/m/0gr42	/award/award_category/nominees./award/award_nomination/nominated_for	/m/0gy4k
/m/020hh3	/people/person/profession	/m/02hrh1q
/m/028r4y	/people/person/place_of_birth	/m/02_286
/m/07fsv	/location/statistical_region/places_exported_to./location/imports_and_exports/exported_to	/m/02wt0
/m/0qy5v	/location/location/time_zones	/m/02lcqs
/m/0d1swh	/sports/pro_athlete/teams./sports/sports_team_roster/team	/m/06cmd2
/m/02wt0	/organization/organization_member/member_of./organization/organization_membership/organization	/m/07t65
/m/03_x5t	/people/person/gender	/m/02zsn
/m/02z1nbg	/award/award_category/winners./award/award_honor/award_winner	/m/03knl
/m/048rn	/film/film/production_companies	/m/0k9ctht
/m/01_njt	/people/person/gender	/m/02zsn
/m/01771z	/award/award_winning_work/awards_won./award/award_honor/honored_for	/m/06c0ns
/m/08j7lh	/film/film/other_crew./film/film_crew_gig/film_crew_role	/m/09zzb8
/m/044mfr	/music/group_member/membership./music/group_membership/group	/m/02k5sc
/m/057lbk	/film/film/other_crew./film/film_crew_gig/film_crew_role	/m/09zzb8
/m/0f1pyf	/soccer/football_player/current_team./sports/sports_team_roster/team	/m/02ryyk
/m/085h1	/user/ktrueman/default_domain/international_organization/member_states	/m/0l3h
/m/0gq_d	/award/award_category/winners./award/award_honor/ceremony	/m/073hd1
/m/01zfzb	/film/film/featured_film_locations	/m/02_286
/m/0ksrf8	/award/award_winner/awards_won./award/award_honor/award_winner	/m/026_w57
/m/05typm	/award/award_nominee/award_nominations./award/award_nomination/nominated_for	/m/0180mw
/m/0r5y9	/location/location/time_zones	/m/02lcqs
/m/0m4yg	/education/educational_institution/students_graduates./education/education/student	/m/04shbh
/m/01j5ts	/film/actor/film./film/performance/film	/m/07xtqq
/m/02yy8	/people/person/spouse_s./people/marriage/spouse	/m/02n9k
/m/0gj8nq2	/film/film/release_date_s./film/film_regional_release_date/film_release_region	/m/047lj
/m/0cb1ky	/people/person/place_of_birth	/m/0dlv0
/m/03sb38	/film/film_distributor/films_distributed./film/film_film_distributor_relationship/film	/m/07xvf
/m/0g768	/music/record_label/artist	/m/0134s5
/m/0jymd	/film/film/other_crew./film/film_crew_gig/film_crew_role	/m/09zzb8
/m/01738f	/music/genre/parent_genre	/m/0glt670
/m/014zcr	/film/actor/film./film/performance/film	/m/06z8s_
/m/01s21dg	/people/person/profession	/m/018gz8
/m/0gy4k	/film/film/release_date_s./film/film_regional_release_date/film_release_region	/m/05r4w
/m/016lmg	/award/award_nominee/award_nominations./award/award_nomination/award	/m/056jm_
/m/01s21dg	/base/popstra/celebrity/canoodled./base/popstra/canoodled/participant	/m/09yrh
/m/03w1v2	/award/award_nominee/award_nominations./award/award_nomination/award_nominee	/m/02tr7d
/m/053y4h	/award/award_nominee/award_nominations./award/award_nomination/award_nominee	/m/01gkmx
/m/017v_	/military/military_combatant/military_conflicts./military/military_combatant_group/combatants	/m/03f4n1
/m/0fpn8	/location/us_county/county_seat	/m/01mgsn
/m/012vd6	/influence/influence_node/influenced_by	/m/0dbb3
/m/0fztbq	/award/award_nominated_work/award_nominations./award/award_nomination/nominated_for	/m/01kf3_9
/m/0298n7	/film/film/executive_produced_by	/m/027z0pl
/m/034zc0	/award/award_nominee/award_nominations./award/award_nomination/award_nominee	/m/015c4g
/m/0bcp9b	/film/film/other_crew./film/film_crew_gig/film_crew_role	/m/09zzb8
/m/02mpyh	/film/film/other_crew./film/film_crew_gig/film_crew_role	/m/09zzb8
/m/0dwt5	/music/performance_role/regular_performances./music/group_membership/role	/m/03q5t
/m/04qw17	/film/film/other_crew./film/film_crew_gig/film_crew_role	/m/09zzb8
/m/0h095	/location/capital_of_administrative_division/capital_of./location/administrative_division_capital_relationship/administrative_division	/m/0fqyc
/m/033g4d	/film/film/runtime./film/film_cut/film_release_region	/m/05r4w
/m/04xn2m	/people/person/profession	/m/02jknp
/m/01309x	/award/award_nominee/award_nominations./award/award_nomination/award	/m/03tk6z
/m/0jm7n	/sports/sports_team/roster./basketball/basketball_roster_position/position	/m/0ctt4z
/m/07663r	/people/person/places_lived./people/place_lived/location	/m/02_286
/m/03gvm3t	/tv/tv_program/genre	/m/09lmb
/m/053ksp	/award/award_nominee/award_nominations./award/award_nomination/nominated_for	/m/026qnh6
/m/0g4pl7z	/film/film/production_companies	/m/03sb38
/m/01dtcb	/music/record_label/artist	/m/0mjn2
/m/07vhb	/education/educational_institution/students_graduates./education/education/student	/m/07ymr5
/m/016pns	/award/award_nominee/award_nominations./award/award_nomination/award	/m/02f76h
/m/06r2h	/film/film/genre	/m/07s2s
/m/0dfjb8	/people/person/languages	/m/0999q
/m/060v34	/film/film/genre	/m/02b5_l
/m/01c427	/award/award_category/winners./award/award_honor/award_winner	/m/01vzxld
/m/0cqh6z	/award/award_category/nominees./award/award_nomination/nominated_for	/m/02rzdcp
/m/043q4d	/tv/non_character_role/tv_regular_personal_appearances./tv/tv_regular_personal_appearance/person	/m/012_53
/m/04yt7	/people/person/profession	/m/018gz8
/m/09f2j	/organization/organization_member/member_of./organization/organization_membership/organization	/m/034h1h
/m/03swmf	/people/person/place_of_birth	/m/02_286
/m/01nm3s	/people/person/profession	/m/02hrh1q
/m/03q0r1	/film/film/release_date_s./film/film_regional_release_date/film_release_region	/m/0165v
/m/01gwck	/education/educational_institution/students_graduates./education/education/major_field_of_study	/m/040p_q
/m/0h03fhx	/award/award_winning_work/awards_won./award/award_honor/award_winner	/m/014zcr
/m/014zfs	/award/award_nominee/award_nominations./award/award_nomination/award_nominee	/m/0c408_
/m/03cprft	/people/person/profession	/m/02hrh1q
/m/0fp_v1x	/people/person/places_lived./people/place_lived/location	/m/013h9
/m/09fqgj	/film/film/other_crew./film/film_crew_gig/film_crew_role	/m/09zzb8
/m/0cy8v	/location/hud_county_place/county	/m/0cv1w
/m/0jymd	/film/film/release_date_s./film/film_regional_release_date/film_release_region	/m/03h64
/m/017149	/award/award_nominee/award_nominations./award/award_nomination/award	/m/027dtxw
/m/099c8n	/award/award_category/nominees./award/award_nomination/nominated_for	/m/09cr8
/m/02z13jg	/award/award_category/winners./award/award_honor/award_winner	/m/016khd
/m/0d1qn	/base/popstra/location/vacationers./base/popstra/vacation_choice/vacationer	/m/01pctb
/m/0d1swh	/sports/pro_athlete/teams./sports/sports_team_roster/team	/m/015_z1
/m/06q8hf	/award/award_nominee/award_nominations./award/award_nomination/award_nominee	/m/01pctb
/m/0b_7k	/people/person/profession	/m/02hrh1q
/m/04h1rz	/government/legislative_session/members./government/government_position_held/legislative_sessions	/m/02bn_p
/m/0jhd	/organization/organization_member/member_of./organization/organization_membership/organization	/m/07t65
/m/022s1m	/film/actor/film./film/performance/film	/m/02_qt
/m/085h1	/user/ktrueman/default_domain/international_organization/member_states	/m/0161c
/m/050023	/award/award_winner/awards_won./award/award_honor/award_winner	/m/070m12
/m/0ddd0gc	/tv/tv_program/regular_cast./tv/regular_tv_appearance/actor	/m/0dgskx
/m/0gj8nq2	/film/film/release_date_s./film/film_regional_release_date/film_release_region	/m/06f32
/m/09f2j	/education/educational_institution/students_graduates./education/education/student	/m/01p6xx
/m/057xs89	/award/award_category/nominees./award/award_nomination/nominated_for	/m/0m63c
/m/0jmnl	/sports/professional_sports_team/draft_picks./sports/sports_league_draft_pick/school	/m/07w0v
/m/026njb5	/film/film/release_date_s./film/film_regional_release_date/film_release_region	/m/06f32
/m/0478__m	/influence/influence_node/influenced_by	/m/01vsy7t
/m/026z9	/music/genre/artists	/m/024qwq
/m/0h03fhx	/film/film/release_date_s./film/film_regional_release_date/film_release_region	/m/03_3d
/m/033gn8	/education/educational_institution/students_graduates./education/education/student	/m/01swck
/m/05_wyz	/business/job_title/people_with_this_title./business/employment_tenure/company	/m/0k9ts
/m/0652ty	/film/actor/film./film/performance/film	/m/0g22z
/m/01j851	/people/person/profession	/m/02hrh1q
/m/01pj7	/organization/organization_member/member_of./organization/organization_membership/organization	/m/02vk52z
/m/071tyz	/education/educational_degree/people_with_this_degree./education/education/institution	/m/08815
/m/04954	/award/award_nominee/award_nominations./award/award_nomination/nominated_for	/m/02c638
/m/0h03fhx	/film/film/produced_by	/m/014zcr
/m/03cxsvl	/award/award_winner/awards_won./award/award_honor/award_winner	/m/0fn8jc
/m/027c924	/award/award_category/winners./award/award_honor/award_winner	/m/0h1p
/m/038_3y	/sports/sports_team/sport	/m/09xp_
/m/0486tv	/olympics/olympic_sport/athletes./olympics/olympic_athlete_affiliation/country	/m/01p1b
/m/01mqh5	/celebrities/celebrity/celebrity_friends./celebrities/friendship/friend	/m/0n6f8
/m/06yykb	/film/film/music	/m/0fpjyd
/m/04t7ts	/film/actor/film./film/performance/film	/m/011yth
/m/016h4r	/people/person/profession	/m/02hrh1q
/m/016clz	/music/genre/artists	/m/04_jsg
/m/03g62	/people/person/places_lived./people/place_lived/location	/m/03v1s
/m/03tbg6	/film/film/produced_by	/m/02tn0_
/m/0bx0l	/film/film/release_date_s./film/film_regional_release_date/film_release_region	/m/03h64
/m/09cr8	/film/film/other_crew./film/film_crew_gig/film_crew_role	/m/09zzb8
/m/02_p5w	/film/actor/film./film/performance/film	/m/016017
/m/01gtc0	/government/legislative_session/members./government/government_position_held/district_represented	/m/07_f2
/m/01f08r	/base/biblioness/bibs_location/country	/m/0j1z8
/m/02w7fs	/award/award_category/winners./award/award_honor/ceremony	/m/056878
/m/06j8wx	/award/award_nominee/award_nominations./award/award_nomination/award_nominee	/m/01hkhq
/m/0d1w9	/film/film_subject/films	/m/05zvzf3
/m/030nwm	/organization/organization/headquarters./location/mailing_address/state_province_region	/m/02m77
/m/0fx0mw	/award/award_nominee/award_nominations./award/award_nomination/award_nominee	/m/02tr7d
/m/0dg3jz	/award/award_nominee/award_nominations./award/award_nomination/award_nominee	/m/0c6g29
/m/0fx0j2	/people/person/gender	/m/02zsn
/m/01xyqk	/music/record_label/artist	/m/09hnb
/m/019rg5	/organization/organization_member/member_of./organization/organization_membership/organization	/m/0gkjy
/m/04zwc	/education/university/local_tuition./measurement_unit/dated_money_value/currency	/m/0kz1h
/m/028_yv	/film/film/release_date_s./film/film_regional_release_date/film_release_region	/m/03_3d
/m/02xcb6n	/award/award_category/nominees./award/award_nomination/nominated_for	/m/02rcwq0
/m/027dtxw	/award/award_category/nominees./award/award_nomination/nominated_for	/m/011yl_
/m/0jbyg	/people/person/profession	/m/02hrh1q
/m/0421st	/people/person/profession	/m/02hrh1q
/m/01jrp0	/film/actor/film./film/performance/film	/m/0hv4t
/m/02r0csl	/award/award_category/nominees./award/award_nomination/nominated_for	/m/050r1z
/m/0bbvr84	/award/award_nominee/award_nominations./award/award_nomination/nominated_for	/m/02rzdcp
/m/099jhq	/award/award_category/winners./award/award_honor/ceremony	/m/0clfdj
/m/04h6mm	/people/person/profession	/m/02jknp
/m/099d4	/people/person/places_lived./people/place_lived/location	/m/03h64
/m/026g73	/music/instrument/instrumentalists	/m/012x4t
/m/0btpm6	/film/film/release_date_s./film/film_regional_release_date/film_release_region	/m/03h64
/m/0lk8j	/user/jg/default_domain/olympic_games/sports	/m/096f8
/m/0dc7hc	/film/film/production_companies	/m/0g1rw
/m/02pw_n	/film/film/genre	/m/01j1n2
/m/02ldv0	/film/actor/film./film/performance/film	/m/09fc83
/m/0263tn1	/award/award_winner/awards_won./award/award_honor/award_winner	/m/06ns98
/m/02prw4h	/film/film/genre	/m/082gq
/m/01lsl	/award/ranked_item/appears_in_ranked_lists./award/ranking/list	/m/05glt
/m/0dx8gj	/award/award_winning_work/awards_won./award/award_honor/award_winner	/m/0h1p
/m/0c3p7	/base/popstra/celebrity/dated./base/popstra/dated/participant	/m/016khd
/m/0dwvl	/music/performance_role/track_performances./music/track_contribution/role	/m/07xzm
/m/06mt91	/base/popstra/celebrity/dated./base/popstra/dated/participant	/m/02hhtj
/m/0f4_2k	/film/film/other_crew./film/film_crew_gig/film_crew_role	/m/09zzb8
/m/0hh2s	/music/genre/parent_genre	/m/07gxw
/m/0f4yh	/award/award_winning_work/awards_won./award/award_honor/award	/m/0gr42
/m/02qr69m	/film/film/other_crew./film/film_crew_gig/film_crew_role	/m/09zzb8
/m/016clz	/music/genre/artists	/m/02k5sc
/m/07jmnh	/award/award_nominee/award_nominations./award/award_nomination/award	/m/03rbj2
/m/09qftb	/award/award_ceremony/awards_presented./award/award_honor/award_winner	/m/023s8
/m/018h2	/media_common/netflix_genre/titles	/m/0n6ds
/m/06ns98	/award/award_winner/awards_won./award/award_honor/award_winner	/m/02xb2bt
/m/09xrxq	/award/award_nominee/award_nominations./award/award_nomination/award_nominee	/m/050_qx
/m/0dwt5	/music/performance_role/regular_performances./music/group_membership/role	/m/01vj9c
/m/05ldnp	/award/award_nominee/award_nominations./award/award_nomination/award_nominee	/m/026gb3v
/m/0190y4	/music/genre/artists	/m/07h76
/m/0f4dx2	/award/award_nominee/award_nominations./award/award_nomination/nominated_for	/m/093dqjy
/m/031b3h	/award/award_category/winners./award/award_honor/award_winner	/m/01wzlxj
/m/03mg35	/award/award_nominee/award_nominations./award/award_nomination/award	/m/02x4w6g
/m/06mt91	/people/person/gender	/m/02zsn
/m/0gg5kmg	/film/film/release_date_s./film/film_regional_release_date/film_release_region	/m/01pj7
/m/01ycbq	/film/actor/film./film/performance/film	/m/033srr
/m/0dznvw	/award/award_ceremony/awards_presented./award/award_honor/honored_for	/m/029jt9
/m/07k53y	/american_football/football_team/current_roster./sports/sports_team_roster/position	/m/023wyl
/m/01jq34	/education/educational_institution/colors	/m/01l849
/m/01tl50z	/people/person/religion	/m/051kv
/m/03d5m8w	/sports/sports_team/sport	/m/039yzs
/m/01gbn6	/people/person/places_lived./people/place_lived/location	/m/06wxw
/m/0glt670	/music/genre/artists	/m/0bqsy
/m/02g0rb	/people/person/profession	/m/02hrh1q
/m/040_9s0	/award/award_category/disciplines_or_subjects	/m/05hgj
/m/02rn00y	/award/award_winning_work/awards_won./award/award_honor/award_winner	/m/05jcn8
/m/035s95	/film/film/genre	/m/0hfjk
/m/07xzm	/music/performance_role/regular_performances./music/group_membership/role	/m/01w4dy
/m/074tb5	/people/person/place_of_birth	/m/013h9
/m/0gj8nq2	/film/film/release_date_s./film/film_regional_release_date/film_release_region	/m/027rn
/m/01_r9k	/education/educational_institution/students_graduates./education/education/major_field_of_study	/m/02822
/m/03p41	/medicine/disease/notable_people_with_this_condition	/m/0b_dh
/m/04ykg	/location/location/adjoin_s./location/adjoining_relationship/adjoins	/m/03s0w
/m/016yxn	/film/film/produced_by	/m/05kfs
/m/05v1sb	/people/deceased_person/place_of_death	/m/0k_p5
/m/09pj68	/award/award_ceremony/awards_presented./award/award_honor/award_winner	/m/018db8
/m/0h7jp	/location/location/contains	/m/01b85
/m/0b57p6	/people/person/profession	/m/02jknp
/m/09gmmt6	/film/film/release_date_s./film/film_regional_release_date/film_release_region	/m/03_3d
/m/026rm_y	/people/person/places_lived./people/place_lived/location	/m/0156q
/m/0g1rw	/film/film_distributor/films_distributed./film/film_film_distributor_relationship/film	/m/02qrv7
/m/015cqh	/award/award_nominee/award_nominations./award/award_nomination/award	/m/01c9jp
/m/0151b0	/music/performance_role/track_performances./music/track_contribution/role	/m/011k_j
/m/06r2h	/film/film/other_crew./film/film_crew_gig/film_crew_role	/m/09zzb8
/m/0hfjk	/media_common/netflix_genre/titles	/m/0_92w
/m/02w7gg	/people/ethnicity/people	/m/0159h6
/m/0bx0l	/film/film/release_date_s./film/film_regional_release_date/film_release_region	/m/05r4w
/m/02qvyrt	/award/award_category/nominees./award/award_nomination/nominated_for	/m/011yl_
/m/05q9g1	/people/person/profession	/m/02jknp
/m/01f2w0	/tv/tv_network/programs./tv/tv_network_duration/program	/m/02wyzmv
/m/0bksh	/base/popstra/celebrity/dated./base/popstra/dated/participant	/m/01s21dg
/m/018fq	/award/award_nominee/award_nominations./award/award_nomination/award	/m/0262yt
/m/02xv8m	/award/award_winner/awards_won./award/award_honor/award_winner	/m/026_w57
/m/03bw6	/award/award_nominee/award_nominations./award/award_nomination/nominated_for	/m/0gxfz
/m/02r22gf	/award/award_category/winners./award/award_honor/award_winner	/m/02q9kqf
/m/01tv3x2	/people/person/places_lived./people/place_lived/location	/m/0dc95
/m/02tk74	/people/person/places_lived./people/place_lived/location	/m/02_286
/m/058z1hb	/award/award_nominee/award_nominations./award/award_nomination/award_nominee	/m/04z_x4v
/m/03qdm	/education/educational_institution/students_graduates./education/education/major_field_of_study	/m/02822
/m/0dn8b	/location/location/adjoin_s./location/adjoining_relationship/adjoins	/m/0cv1w
/m/0dwxr	/olympics/olympic_sport/athletes./olympics/olympic_athlete_affiliation/country	/m/06bnz
/m/02c6pq	/film/actor/film./film/performance/film	/m/0cc7hmk
/m/0mm1q	/film/director/film	/m/04n52p6
/m/01243b	/music/genre/parent_genre	/m/016clz
/m/063b4k	/award/award_nominee/award_nominations./award/award_nomination/award	/m/0gqng
/m/04gknr	/award/award_winning_work/awards_won./award/award_honor/award_winner	/m/03cvv4
/m/01jfnvd	/music/group_member/membership./music/group_membership/group	/m/0mjn2
/m/01j5ts	/film/actor/film./film/performance/film	/m/0pdp8
/m/0ds6bmk	/film/film/release_date_s./film/film_regional_release_date/film_release_region	/m/03_3d
/m/0fnb4	/base/biblioness/bibs_location/country	/m/0162b
/m/016sqs	/award/award_nominee/award_nominations./award/award_nomination/award_nominee	/m/01l47f5
/m/02mz_6	/award/award_nominee/award_nominations./award/award_nomination/award	/m/09v1lrz
/m/048cl	/influence/influence_node/influenced_by	/m/01lwx
/m/047lj	/organization/organization_member/member_of./organization/organization_membership/organization	/m/0_2v
/m/02x73k6	/award/award_category/nominees./award/award_nomination/nominated_for	/m/0btpm6
/m/050r1z	/film/film/cinematography	/m/09bxq9
/m/01ypc	/sports/professional_sports_team/draft_picks./sports/sports_league_draft_pick/school	/m/02gr81
/m/0g1rw	/film/film_distributor/films_distributed./film/film_film_distributor_relationship/film	/m/0ct5zc
/m/01grq1	/government/legislative_session/members./government/government_position_held/district_represented	/m/05fkf
/m/01pj5q	/people/person/profession	/m/018gz8
/m/01shy7	/film/film/release_date_s./film/film_regional_release_date/film_release_region	/m/06bnz
/m/017l96	/music/record_label/artist	/m/05cljf
/m/0gsg7	/tv/tv_network/programs./tv/tv_network_duration/program	/m/09fc83
/m/0f7hc	/award/award_nominee/award_nominations./award/award_nomination/award	/m/04ljl_l
/m/01vrt_c	/people/person/spouse_s./people/marriage/location_of_ceremony	/m/01p8s
/m/09x3r	/user/jg/default_domain/olympic_games/sports	/m/06wrt
/m/02mpyh	/film/film/produced_by	/m/029m83
/m/0z4s	/award/award_nominee/award_nominations./award/award_nomination/award_nominee	/m/02ct_k
/m/01zt10	/people/person/gender	/m/02zsn
/m/01nm3s	/award/award_nominee/award_nominations./award/award_nomination/award_nominee	/m/034g2b
/m/050zr4	/award/award_winner/awards_won./award/award_honor/award_winner	/m/0341n5
/m/01vg13	/education/educational_institution/colors	/m/01l849
/m/05bt6j	/music/genre/artists	/m/010hn
/m/07s6fsf	/education/educational_degree/people_with_this_degree./education/education/major_field_of_study	/m/0fzyg
/m/05zvzf3	/film/film/release_date_s./film/film_regional_release_date/film_release_region	/m/05r4w
/m/01vrt_c	/award/award_winner/awards_won./award/award_honor/award_winner	/m/09hnb
/m/01gb54	/award/award_nominee/award_nominations./award/award_nomination/nominated_for	/m/02ryz24
/m/0crc2cp	/film/film/release_date_s./film/film_regional_release_date/film_release_region	/m/03h64
/m/01vsnff	/music/artist/track_contributions./music/track_contribution/role	/m/01vj9c
/m/0d1w9	/film/film_subject/films	/m/0cwfgz
/m/0c01c	/people/person/profession	/m/02hrh1q
/m/06fpsx	/award/award_nominated_work/award_nominations./award/award_nomination/nominated_for	/m/05k2xy
/m/03l26m	/sports/pro_athlete/teams./sports/sports_team_roster/team	/m/0jm3v
/m/0q1lp	/people/person/places_lived./people/place_lived/location	/m/04n3l
/m/0kjgl	/film/actor/film./film/performance/film	/m/09cr8
/m/0sz28	/people/person/profession	/m/02jknp
/m/0ddcbd5	/film/film/genre	/m/0bkbm
/m/09dfcj	/location/location/adjoin_s./location/adjoining_relationship/adjoins	/m/0mw7h
/m/07bxhl	/location/location/partially_contains	/m/09glw
/m/02r0csl	/award/award_category/nominees./award/award_nomination/nominated_for	/m/035_2h
/m/02sb1w	/award/award_winner/awards_won./award/award_honor/award_winner	/m/027dtv3
/m/05fly	/location/location/contains	/m/0dp90
/m/04954	/award/award_nominee/award_nominations./award/award_nomination/award_nominee	/m/017149
/m/02x8m	/music/genre/artists	/m/0277c3
/m/0r1jr	/location/location/time_zones	/m/02lcqs
/m/02f1c	/people/person/gender	/m/02zsn
/m/027m67	/award/award_winning_work/awards_won./award/award_honor/award_winner	/m/01f7v_
/m/0k4p0	/film/film/produced_by	/m/029m83
/m/08j7lh	/film/film/country	/m/03h64
/m/011zwl	/people/person/places_lived./people/place_lived/location	/m/02m77
/m/0gr42	/award/award_category/nominees./award/award_nomination/nominated_for	/m/0h21v2
/m/017dbx	/tv/tv_program/program_creator	/m/0f1vrl
/m/02778tk	/award/award_nominee/award_nominations./award/award_nomination/award_nominee	/m/026w_gk
/m/07xzm	/music/performance_role/track_performances./music/track_contribution/role	/m/0dwtp
/m/0jm7n	/sports/professional_sports_team/draft_picks./sports/sports_league_draft_pick/school	/m/0jkhr
/m/0dg3jz	/people/person/place_of_birth	/m/01_d4
/m/01r9md	/people/person/profession	/m/02hrh1q
/m/06j6l	/music/genre/artists	/m/09h4b5
/m/016clz	/music/genre/artists	/m/013rfk
/m/0ds3t5x	/film/film/release_date_s./film/film_regional_release_date/film_release_region	/m/03_3d
/m/091yn0	/base/popstra/celebrity/friendship./base/popstra/friendship/participant	/m/07ymr5
/m/02z13jg	/award/award_category/winners./award/award_honor/award_winner	/m/026rm_y
/m/02g0rb	/award/award_nominee/award_nominations./award/award_nomination/nominated_for	/m/02rq8k8
/m/0jz9f	/film/film_distributor/films_distributed./film/film_film_distributor_relationship/film	/m/0qf2t
/m/01x5fb	/education/educational_institution/students_graduates./education/education/student	/m/01wsl7c
/m/0p_2r	/award/award_winner/awards_won./award/award_honor/award_winner	/m/0284gcb
/m/05sxzwc	/film/film/genre	/m/0hfjk
/m/02184q	/film/actor/film./film/performance/film	/m/01cycq
/m/0h6rm	/education/educational_institution/students_graduates./education/education/major_field_of_study	/m/034ns
/m/01qkqwg	/people/person/profession	/m/02hrh1q
/m/01l2b3	/film/film/language	/m/04306rv
/m/01vzxld	/music/artist/origin	/m/04523f
/m/058frd	/people/person/place_of_birth	/m/0mnyn
/m/056vv	/location/location/adjoin_s./location/adjoining_relationship/adjoins	/m/01pj7
/m/046p9	/award/award_nominee/award_nominations./award/award_nomination/award	/m/02f73p
/m/026z9	/music/genre/artists	/m/046p9
/m/03cd1q	/people/person/places_lived./people/place_lived/location	/m/09949m
/m/0372j5	/film/film/language	/m/04306rv
/m/014zfs	/people/person/profession	/m/02hrh1q
/m/0gsg7	/award/award_winner/awards_won./award/award_honor/award_winner	/m/05gnf
/m/0j8f09z	/film/film/release_date_s./film/film_regional_release_date/film_release_region	/m/0j1z8
/m/01srq2	/award/award_winning_work/awards_won./award/award_honor/award	/m/02qrwjt
/m/01s7pm	/education/educational_institution/colors	/m/0jc_p
/m/05xf75	/award/award_nominee/award_nominations./award/award_nomination/award	/m/057xs89
/m/08jyyk	/music/genre/artists	/m/03j24kf
/m/0btpm6	/award/award_winning_work/awards_won./award/award_honor/award	/m/057xs89
/m/0n5jm	/location/location/adjoin_s./location/adjoining_relationship/adjoins	/m/0n5kc
/m/046qq	/people/person/profession	/m/02hrh1q
/m/0bt4g	/award/ranked_item/appears_in_ranked_lists./award/ranking/list	/m/05glt
/m/05_wyz	/business/job_title/people_with_this_title./business/employment_tenure/company	/m/03phgz
/m/0btpm6	/film/film/featured_film_locations	/m/03h64
/m/0209xj	/award/award_winning_work/awards_won./award/award_honor/award	/m/02x4wr9
/m/0d0xs5	/award/award_nominee/award_nominations./award/award_nomination/nominated_for	/m/09rvcvl
/m/02c_wc	/film/actor/film./film/performance/film	/m/0f42nz
/m/01nr63	/people/person/profession	/m/018gz8
/m/01wgxtl	/award/award_nominee/award_nominations./award/award_nomination/award_nominee	/m/016kjs
/m/02vpvk	/sports/sports_team/colors	/m/06fvc
/m/03t22m	/music/instrument/instrumentalists	/m/01l7cxq
/m/0fbvqf	/award/award_category/winners./award/award_honor/award_winner	/m/04bd8y
/m/0d810y	/award/award_winner/awards_won./award/award_honor/award_winner	/m/0bbvr84
/m/04d_mtq	/people/person/profession	/m/02hrh1q
/m/0c0k1	/base/popstra/celebrity/dated./base/popstra/dated/participant	/m/023s8
/m/04ls81	/sports/sports_team/roster./american_football/football_roster_position/position	/m/023wyl
/m/041rhq	/film/actor/film./film/performance/film	/m/0n08r
/m/0gy4k	/film/film/genre	/m/082gq
/m/02dlfh	/base/popstra/celebrity/canoodled./base/popstra/canoodled/participant	/m/01pgzn_
/m/04954	/film/actor/film./film/performance/film	/m/09sr0
/m/04jwly	/award/award_winning_work/awards_won./award/award_honor/award	/m/02x4wr9
/m/01xcr4	/award/award_winner/awards_won./award/award_honor/award_winner	/m/0c33pl
/m/01chpn	/film/film/other_crew./film/film_crew_gig/film_crew_role	/m/09zzb8
/m/0gdh5	/award/award_nominee/award_nominations./award/award_nomination/award	/m/01c427
/m/0gr42	/award/award_category/nominees./award/award_nomination/nominated_for	/m/0bbgvp
/m/0gsg7	/tv/tv_network/programs./tv/tv_network_duration/program	/m/07gbf
/m/053xw6	/award/award_nominee/award_nominations./award/award_nomination/award	/m/027dtxw
/m/0yyn5	/award/award_winning_work/awards_won./award/award_honor/award_winner	/m/02g0rb
/m/018qb4	/olympics/olympic_games/sports	/m/0w0d
/m/015c4g	/award/award_nominee/award_nominations./award/award_nomination/award_nominee	/m/034zc0
/m/04fjzv	/film/film/release_date_s./film/film_regional_release_date/film_release_region	/m/03h64
/m/01g03q	/award/award_winning_work/awards_won./award/award_honor/award_winner	/m/06gp3f
/m/07h565	/award/award_winner/awards_won./award/award_honor/award_winner	/m/028r4y
/m/025jfl	/award/award_nominee/award_nominations./award/award_nomination/award	/m/01lj_c
/m/01p6xx	/people/person/place_of_birth	/m/02_286
/m/02z1nbg	/award/award_category/winners./award/award_honor/award_winner	/m/018_lb
/m/0l1589	/music/performance_role/regular_performances./music/group_membership/group	/m/048xh
/m/04pnx	/location/location/contains	/m/05c74
/m/01pgzn_	/base/popstra/celebrity/canoodled./base/popstra/canoodled/participant	/m/02dlfh
/m/013807	/education/educational_institution/colors	/m/01l849
/m/02hsq3m	/award/award_category/nominees./award/award_nomination/nominated_for	/m/01f7jt
/m/02ct_k	/award/award_nominee/award_nominations./award/award_nomination/award_nominee	/m/034zc0
/m/03d8njj	/people/person/profession	/m/02jknp
/m/01795t	/film/film_distributor/films_distributed./film/film_film_distributor_relationship/film	/m/0j6b5
/m/01771z	/award/award_winning_work/awards_won./award/award_honor/honored_for	/m/074rg9
/m/03ftmg	/people/person/spouse_s./people/marriage/location_of_ceremony	/m/03h64
/m/04gknr	/film/film/genre	/m/082gq
/m/01gbn6	/base/popstra/celebrity/canoodled./base/popstra/canoodled/participant	/m/01vwllw
/m/02zrv7	/people/person/profession	/m/018gz8
/m/01sqd7	/music/record_label/artist	/m/016nvh
/m/01trtc	/music/record_label/artist	/m/0137g1
/m/0gsg7	/tv/tv_network/programs./tv/tv_network_duration/program	/m/01dvry
/m/07fsv	/organization/organization_member/member_of./organization/organization_membership/organization	/m/0_2v
/m/012gq6	/people/person/profession	/m/018gz8
/m/019n9w	/education/educational_institution/students_graduates./education/education/major_field_of_study	/m/04rjg
/m/03rl1g	/government/legislative_session/members./government/government_position_held/district_represented	/m/02xry
/m/0gqng	/award/award_category/winners./award/award_honor/ceremony	/m/02yvhx
/m/02xb2bt	/award/award_winner/awards_won./award/award_honor/award_winner	/m/01x4sb
/m/07yklv	/music/genre/parent_genre	/m/0bt7w
/m/03w1v2	/award/award_nominee/award_nominations./award/award_nomination/award_nominee	/m/026v437
/m/0298n7	/film/film/other_crew./film/film_crew_gig/film_crew_role	/m/09zzb8
/m/0bksh	/base/popstra/celebrity/friendship./base/popstra/friendship/participant	/m/026c1
/m/04n52p6	/film/film/other_crew./film/film_crew_gig/film_crew_role	/m/0263ycg
/m/01pxcf	/award/ranked_item/appears_in_ranked_lists./award/ranking/list	/m/09g7thr
/m/02k1pr	/film/film/music	/m/0146pg
/m/0c9k8	/film/film/genre	/m/017fp
/m/011zwl	/people/person/place_of_birth	/m/02m77
/m/0sz28	/people/person/sibling_s./people/sibling_relationship/sibling	/m/04zn7g
/m/026v1z	/award/award_winner/awards_won./award/award_honor/award_winner	/m/0g5lhl7
/m/01w565	/music/record_label/artist	/m/0f8grf
/m/0bl3nn	/film/film/other_crew./film/film_crew_gig/film_crew_role	/m/09zzb8
/m/05cl2w	/people/person/profession	/m/02hrh1q
/m/011k_j	/music/performance_role/track_performances./music/track_contribution/role	/m/0151b0
/m/01tl50z	/people/person/profession	/m/02hrh1q
/m/0c33pl	/tv/tv_personality/tv_regular_appearances./tv/tv_regular_personal_appearance/program	/m/0304nh
/m/02r22gf	/award/award_category/nominees./award/award_nomination/nominated_for	/m/064lsn
/m/029jt9	/film/film/genre	/m/02kdv5l
/m/02qvyrt	/award/award_category/nominees./award/award_nomination/nominated_for	/m/0f4yh
/m/026rm_y	/award/award_nominee/award_nominations./award/award_nomination/award	/m/027dtxw
/m/01pcz9	/people/person/gender	/m/02zsn
/m/0g768	/music/record_label/artist	/m/03xhj6
/m/0dwvl	/music/performance_role/track_performances./music/track_contribution/role	/m/03q5t
/m/0c0nhgv	/film/film/release_date_s./film/film_regional_release_date/film_release_region	/m/05r4w
/m/0512p	/sports/professional_sports_team/draft_picks./sports/sports_league_draft_pick/school	/m/01pl14
/m/0glt670	/music/genre/artists	/m/01vw20_
/m/0gfmc_	/film/film_distributor/films_distributed./film/film_film_distributor_relationship/film	/m/07bwr
/m/0f4_2k	/film/film/language	/m/04306rv
/m/0d8w2n	/film/film/featured_film_locations	/m/02_286
/m/01jfnvd	/award/award_nominee/award_nominations./award/award_nomination/award_nominee	/m/01xzb6
/m/09pj68	/award/award_ceremony/awards_presented./award/award_honor/award_winner	/m/0146pg
/m/01pgzn_	/base/popstra/celebrity/friendship./base/popstra/friendship/participant	/m/03_x5t
/m/0341n5	/award/award_winner/awards_won./award/award_honor/award_winner	/m/050zr4
/m/05ztm4r	/people/person/places_lived./people/place_lived/location	/m/02_286
/m/07sbbz2	/music/genre/artists	/m/0134pk
/m/031q3w	/education/educational_institution/students_graduates./education/education/student	/m/025cn2
/m/01lsl	/film/film/featured_film_locations	/m/02_286
/m/02tf1y	/people/person/places_lived./people/place_lived/location	/m/02_286
/m/0jz9f	/film/film_distributor/films_distributed./film/film_film_distributor_relationship/film	/m/05dptj
/m/02x73k6	/award/award_category/nominees./award/award_nomination/nominated_for	/m/016fyc
/m/01mgw	/film/film/featured_film_locations	/m/0qb62
/m/05233hy	/film/film_set_designer/film_sets_designed	/m/048rn
/m/0h_cssd	/award/award_ceremony/awards_presented./award/award_honor/honored_for	/m/06w99h3
/m/0gdh5	/music/artist/origin	/m/05ksh
/m/016clz	/music/genre/artists	/m/012x1l
/m/027m67	/film/film/cinematography	/m/02404v
/m/0vmt	/location/statistical_region/religions./location/religion_percentage/religion	/m/058x5
/m/01q0kg	/education/educational_institution/colors	/m/01l849
/m/063lqs	/award/award_nominee/award_nominations./award/award_nomination/award	/m/02q1tc5
/m/016clz	/music/genre/artists	/m/057xn_m
/m/07663r	/people/person/profession	/m/018gz8
/m/01q9b9	/people/person/place_of_birth	/m/06wxw
/m/07gbf	/award/award_winning_work/awards_won./award/award_honor/award_winner	/m/026dx
/m/0mx2h	/location/location/time_zones	/m/02lcqs
/m/03y82t6	/people/person/profession	/m/02hrh1q
/m/0262yt	/award/award_category/winners./award/award_honor/award_winner	/m/07w21
/m/02m3sd	/people/person/profession	/m/02jknp
/m/0bt7w	/music/genre/parent_genre	/m/016clz
/m/09v8clw	/film/film/production_companies	/m/01795t
/m/02tn0_	/award/award_nominee/award_nominations./award/award_nomination/award	/m/07z2lx
/m/05kfs	/people/person/places_lived./people/place_lived/location	/m/02_286
/m/021y7yw	/film/film/production_companies	/m/025jfl
/m/05s_c38	/sports/pro_athlete/teams./sports/sports_team_roster/team	/m/0284h6
/m/02yv6b	/music/genre/artists	/m/067mj
/m/02x73k6	/award/award_category/nominees./award/award_nomination/nominated_for	/m/09cr8
/m/01w272y	/music/artist/track_contributions./music/track_contribution/role	/m/01vj9c
/m/0177z	/travel/travel_destination/climate./travel/travel_destination_monthly_climate/month	/m/0lkm
/m/05bt6j	/music/genre/artists	/m/01kd57
/m/02q7fl9	/award/award_nominated_work/award_nominations./award/award_nomination/nominated_for	/m/0fy34l
/m/03z20c	/film/film/featured_film_locations	/m/02_286
/m/08720	/award/award_winning_work/awards_won./award/award_honor/award	/m/02g3ft
/m/02yv6b	/music/genre/artists	/m/0134pk
/m/0p_2r	/tv/tv_producer/programs_produced./tv/tv_producer_term/program	/m/039cq4
/m/016z2j	/award/award_nominee/award_nominations./award/award_nomination/award_nominee	/m/03mg35
/m/0lk8j	/user/jg/default_domain/olympic_games/sports	/m/0486tv
/m/01fwpt	/people/person/sibling_s./people/sibling_relationship/sibling	/m/01gkmx
/m/057xs89	/award/award_category/nominees./award/award_nomination/nominated_for	/m/0cbv4g
/m/0362q0	/people/person/place_of_birth	/m/0dyl9
/m/02zrv7	/base/popstra/celebrity/dated./base/popstra/dated/participant	/m/026c1
/m/01vj9c	/music/performance_role/track_performances./music/track_contribution/role	/m/02k856
/m/01m1dzc	/award/award_winner/awards_won./award/award_honor/award_winner	/m/03mszl
/m/015c4g	/people/person/profession	/m/02hrh1q
/m/03y82t6	/celebrities/celebrity/celebrity_friends./celebrities/friendship/friend	/m/057xn_m
/m/043vc	/sports/sports_team/roster./american_football/football_historical_roster_position/position_s	/m/047g8h
/m/0gtsx8c	/film/film/release_date_s./film/film_regional_release_date/film_release_region	/m/06bnz
/m/01q_y0	/tv/tv_program/regular_cast./tv/regular_tv_appearance/actor	/m/033jj1
/m/03zv9	/sports/sports_league/teams./sports/sports_league_participation/team	/m/0ytc
/m/01vvlyt	/people/person/gender	/m/02zsn
/m/01mgw	/award/award_winning_work/awards_won./award/award_honor/award	/m/0gqng
/m/0b66qd	/people/person/profession	/m/02jknp
/m/021yc7p	/award/award_nominee/award_nominations./award/award_nomination/award	/m/02r22gf
/m/01v8y9	/music/performance_role/regular_performances./music/group_membership/role	/m/0j862
/m/02xb2bt	/award/award_winner/awards_won./award/award_honor/award_winner	/m/0263tn1
/m/04135	/people/person/profession	/m/02hrh1q
/m/042kbj	/people/person/profession	/m/02jknp
/m/02qfhb	/film/actor/film./film/performance/film	/m/05t0_2v
/m/01fwpt	/people/person/place_of_birth	/m/02_286
/m/0g5qmbz	/film/film/release_date_s./film/film_regional_release_date/film_release_region	/m/05r4w
/m/01g03q	/tv/tv_program/regular_cast./tv/regular_tv_appearance/actor	/m/06lht1
/m/03x400	/award/award_nominee/award_nominations./award/award_nomination/nominated_for	/m/0462hhb
/m/05qjt	/education/field_of_study/students_majoring./education/education/student	/m/059y0
/m/0356dp	/people/person/profession	/m/02hrh1q
/m/0bdt8	/award/award_nominee/award_nominations./award/award_nomination/award_nominee	/m/04r7p
/m/0bt4g	/award/award_winning_work/awards_won./award/award_honor/award	/m/018wdw
/m/017149	/award/award_nominee/award_nominations./award/award_nomination/award_nominee	/m/0z4s
/m/02fwfb	/award/award_winning_work/awards_won./award/award_honor/award	/m/02r0csl
/m/0f4yh	/award/award_winning_work/awards_won./award/award_honor/award	/m/0262s1
/m/0fpv_3_	/film/film/release_date_s./film/film_regional_release_date/film_release_region	/m/027rn
/m/01243b	/music/genre/artists	/m/012ycy
/m/016clz	/music/genre/artists	/m/01vt5c_
/m/03_x5t	/people/person/profession	/m/02hrh1q
/m/05r4w	/location/statistical_region/places_exported_to./location/imports_and_exports/exported_to	/m/01z215
/m/0gltv	/film/film/produced_by	/m/02qjpv5
/m/02rn00y	/award/award_winning_work/awards_won./award/award_honor/award	/m/02qvyrt
/m/01r3w7	/education/educational_institution/school_type	/m/01rs41
/m/03qdm	/education/educational_institution/colors	/m/01l849
/m/01vsy7t	/film/actor/film./film/performance/film	/m/02pxst
/m/015c4g	/base/popstra/celebrity/friendship./base/popstra/friendship/participant	/m/07g2v
/m/01j851	/people/person/profession	/m/01p5_g
/m/01rhrd	/organization/organization_member/member_of./organization/organization_membership/organization	/m/07t65
/m/05r4w	/location/statistical_region/places_exported_to./location/imports_and_exports/exported_to	/m/02k54
/m/03pmzt	/film/actor/film./film/performance/film	/m/02_qt
/m/02tr7d	/award/award_nominee/award_nominations./award/award_nomination/award_nominee	/m/040981l
/m/04zx3q1	/education/educational_degree/people_with_this_degree./education/education/institution	/m/08815
/m/016clz	/music/genre/artists	/m/0dvqq
/m/043tvp3	/film/film/other_crew./film/film_crew_gig/film_crew_role	/m/02rh1dz
/m/0bdxs5	/base/popstra/celebrity/friendship./base/popstra/friendship/participant	/m/03xnq9_
/m/01z215	/location/location/adjoin_s./location/adjoining_relationship/adjoins	/m/0j1z8
/m/02qwg	/people/person/profession	/m/02hrh1q
/m/099jhq	/award/award_category/winners./award/award_honor/award_winner	/m/0f7hc
/m/0cwfgz	/award/award_nominated_work/award_nominations./award/award_nomination/nominated_for	/m/01771z
/m/09q5w2	/award/award_winning_work/awards_won./award/award_honor/award	/m/0gr42
/m/05bt6j	/music/genre/artists	/m/02p68d
/m/0fx0mw	/award/award_nominee/award_nominations./award/award_nomination/award_nominee	/m/040981l
/m/02q9kqf	/award/award_nominee/award_nominations./award/award_nomination/award	/m/02r22gf
/m/016clz	/music/genre/artists	/m/018ndc
/m/05qbbfb	/film/film/other_crew./film/film_crew_gig/film_crew_role	/m/09zzb8
/m/0372j5	/film/film/release_date_s./film/film_regional_release_date/film_release_region	/m/03_3d
/m/09b0xs	/award/award_nominee/award_nominations./award/award_nomination/nominated_for	/m/015w8_
/m/0249kn	/award/award_nominee/award_nominations./award/award_nomination/award_nominee	/m/02x8z_
/m/01vj9c	/music/performance_role/regular_performances./music/group_membership/role	/m/0l1589
/m/02bn_p	/government/legislative_session/members./government/government_position_held/district_represented	/m/07_f2
/m/01vvlyt	/award/award_nominee/award_nominations./award/award_nomination/award_nominee	/m/09hnb
/m/0k_kr	/music/record_label/artist	/m/03j24kf
/m/0m4yg	/education/educational_institution/students_graduates./education/education/major_field_of_study	/m/0w7c
/m/03lrht	/film/film/genre	/m/01t_vv
/m/01s1zk	/people/person/profession	/m/02hrh1q
/m/0n3g	/base/popstra/location/vacationers./base/popstra/vacation_choice/vacationer	/m/09yrh
/m/098n5	/award/award_nominee/award_nominations./award/award_nomination/nominated_for	/m/0f4k49
/m/01kb2j	/award/award_nominee/award_nominations./award/award_nomination/award_nominee	/m/01gq0b
/m/07jmnh	/film/actor/film./film/performance/film	/m/03rz2b
/m/0glt670	/music/genre/artists	/m/017lb_
/m/01hmk9	/people/person/profession	/m/02hrh1q
/m/07ykkx5	/film/film/genre	/m/02b5_l
/m/03wnh	/sports/sports_team/roster./american_football/football_roster_position/position	/m/02g_6x
/m/02wmbg	/people/person/places_lived./people/place_lived/location	/m/0c8tk
/m/0g768	/music/record_label/artist	/m/0jn38
/m/01k165	/people/person/religion	/m/02t7t
/m/056jm_	/award/award_category/winners./award/award_honor/ceremony	/m/056878
/m/04qr6d	/people/person/profession	/m/02jknp
/m/01795t	/award/award_nominee/award_nominations./award/award_nomination/award	/m/0gq_d
/m/087wc7n	/film/film/release_date_s./film/film_regional_release_date/film_release_region	/m/03h64
/m/02x1z2s	/award/award_category/nominees./award/award_nomination/nominated_for	/m/03n3gl
/m/02tr7d	/award/award_winner/awards_won./award/award_honor/award_winner	/m/06j8wx
/m/0hndn2q	/award/award_ceremony/awards_presented./award/award_honor/honored_for	/m/0ddd0gc
/m/03x400	/award/award_nominee/award_nominations./award/award_nomination/award_nominee	/m/07b2lv
/m/0134pk	/award/award_nominee/award_nominations./award/award_nomination/award	/m/02wh75
/m/03mszl	/people/person/gender	/m/02zsn
/m/06j6l	/music/genre/artists	/m/01vrt_c
/m/02bn_p	/government/legislative_session/members./government/government_position_held/legislative_sessions	/m/02bqmq
/m/018wdw	/award/award_category/nominees./award/award_nomination/nominated_for	/m/02h22
/m/05fmy	/award/award_category/winners./award/award_honor/award_winner	/m/099p5
/m/0cjsxp	/award/award_nominee/award_nominations./award/award_nomination/award_nominee	/m/07d3z7
/m/0hgqq	/people/deceased_person/place_of_death	/m/02_286
/m/02m501	/award/award_nominee/award_nominations./award/award_nomination/award	/m/02x4w6g
/m/03_2td	/people/person/profession	/m/02hrh1q
/m/0gxfz	/award/award_winning_work/awards_won./award/award_honor/award_winner	/m/044qx
/m/012vd6	/people/person/place_of_birth	/m/0c_m3
/m/02qr69m	/film/film/language	/m/05zjd
/m/02dr9j	/award/award_winning_work/awards_won./award/award_honor/award	/m/02g3ft
/m/0277c3	/music/artist/track_contributions./music/track_contribution/role	/m/01vj9c
/m/02t_v1	/people/person/profession	/m/02hrh1q
/m/06_vpyq	/award/award_winner/awards_won./award/award_honor/award_winner	/m/0bbvr84
/m/0gtgp6	/soccer/football_player/current_team./sports/sports_team_roster/team	/m/01wx_y
/m/05tgks	/film/film/other_crew./film/film_crew_gig/film_crew_role	/m/09zzb8
/m/07s6fsf	/education/educational_degree/people_with_this_degree./education/education/institution	/m/04p_hy
/m/0cjsxp	/award/award_winner/awards_won./award/award_honor/award_winner	/m/07d3z7
/m/0421v9q	/film/film/release_date_s./film/film_regional_release_date/film_release_region	/m/03_3d
/m/03x3wf	/award/award_category/winners./award/award_honor/ceremony	/m/056878
/m/018wdw	/award/award_category/nominees./award/award_nomination/nominated_for	/m/05zlld0
/m/0c4f4	/award/award_nominee/award_nominations./award/award_nomination/award_nominee	/m/01y0y6
/m/03ckfl9	/music/genre/artists	/m/03c7ln
/m/0170vn	/film/actor/film./film/performance/film	/m/0jqp3
/m/0ddbjy4	/film/film/release_date_s./film/film_regional_release_date/film_release_region	/m/03h64
/m/03f0r5w	/people/person/profession	/m/02hrh1q
/m/01gb54	/award/award_nominee/award_nominations./award/award_nomination/nominated_for	/m/047csmy
/m/01243b	/music/genre/artists	/m/03xnq9_
/m/0ddbjy4	/film/film/release_date_s./film/film_regional_release_date/film_release_region	/m/03_3d
/m/099c8n	/award/award_category/nominees./award/award_nomination/nominated_for	/m/0g4vmj8
/m/0htlr	/people/person/profession	/m/02jknp
/m/016z2j	/base/popstra/celebrity/friendship./base/popstra/friendship/participant	/m/09yrh
/m/01r3w7	/education/educational_institution/students_graduates./education/education/major_field_of_study	/m/05qjt
/m/0gh8zks	/film/film/release_date_s./film/film_regional_release_date/film_release_region	/m/03_3d
/m/0fgg8c	/american_football/football_team/current_roster./sports/sports_team_roster/position	/m/047g8h
/m/059y0	/influence/influence_node/influenced_by	/m/02m7r
/m/05nrkb	/education/educational_institution/students_graduates./education/education/student	/m/01qn8k
/m/02hblj	/people/person/profession	/m/02hrh1q
/m/0dwvl	/music/performance_role/track_performances./music/track_contribution/role	/m/03t22m
/m/027rqbx	/location/location/contains	/m/0dn8b
/m/02r22gf	/award/award_category/nominees./award/award_nomination/nominated_for	/m/0_92w
/m/0971v	/food/food/nutrients./food/nutrition_fact/nutrient	/m/025sqz8
/m/01r4zfk	/people/person/profession	/m/02hrh1q
/m/063y_ky	/award/award_category/nominees./award/award_nomination/nominated_for	/m/0ds2n
/m/0159h6	/award/award_nominee/award_nominations./award/award_nomination/nominated_for	/m/0462hhb
/m/03t22m	/music/performance_role/regular_performances./music/group_membership/group	/m/014pg1
/m/0fbvqf	/award/award_category/nominees./award/award_nomination/nominated_for	/m/02rzdcp
/m/02k1pr	/film/film/genre	/m/02kdv5l
/m/024rgt	/film/film_distributor/films_distributed./film/film_film_distributor_relationship/film	/m/0dp7wt
/m/0d3f83	/soccer/football_player/current_team./sports/sports_team_roster/team	/m/01z1r
/m/0b7gr2	/award/award_nominee/award_nominations./award/award_nomination/award_nominee	/m/04s04
/m/03h2d4	/award/award_nominee/award_nominations./award/award_nomination/award_nominee	/m/016z2j
/m/0h6rm	/education/educational_institution/students_graduates./education/education/major_field_of_study	/m/04rjg
/m/0c5x_	/award/ranked_item/appears_in_ranked_lists./award/ranking/list	/m/09g7thr
/m/0134w7	/film/actor/film./film/performance/film	/m/031778
/m/06zgc	/olympics/olympic_sport/athletes./olympics/olympic_athlete_affiliation/country	/m/047lj
/m/04ljl_l	/award/award_category/nominees./award/award_nomination/nominated_for	/m/03tbg6
/m/012_53	/people/person/gender	/m/02zsn
/m/0cbv4g	/film/film/other_crew./film/film_crew_gig/film_crew_role	/m/09zzb8
/m/096f8	/olympics/olympic_sport/athletes./olympics/olympic_athlete_affiliation/country	/m/05r4w
/m/05zvzf3	/film/film/release_date_s./film/film_regional_release_date/film_release_region	/m/02k54
/m/0lk8j	/user/jg/default_domain/olympic_games/sports	/m/06wrt
/m/05cl2w	/film/actor/film./film/performance/film	/m/04x4vj
/m/02t_v1	/award/award_winner/awards_won./award/award_honor/award_winner	/m/02_hj4
/m/012x2b	/film/actor/film./film/performance/film	/m/065_cjc
/m/0971v	/food/food/nutrients./food/nutrition_fact/nutrient	/m/07hnp
/m/01f8gz	/film/film/other_crew./film/film_crew_gig/film_crew_role	/m/09zzb8
/m/0vmt	/location/statistical_region/religions./location/religion_percentage/religion	/m/05sfs
/m/0c9t0y	/award/award_winning_work/awards_won./award/award_honor/award	/m/05f4m9q
/m/03mr85	/film/film/film_art_direction_by	/m/05v1sb
/m/03hnd	/influence/influence_node/influenced_by	/m/04093
/m/0bxtg	/film/actor/film./film/performance/film	/m/0c00zd0
/m/05fkf	/location/location/contains	/m/0jkhr
/m/02lfp4	/award/award_winner/awards_won./award/award_honor/award_winner	/m/016szr
/m/057xs89	/award/award_category/winners./award/award_honor/award_winner	/m/02fn5
/m/051ls	/base/aareas/schema/administrative_area/administrative_parent	/m/04q42
/m/0j3d9tn	/film/film/release_date_s./film/film_regional_release_date/film_release_region	/m/05r4w
/m/05sxzwc	/film/film/genre	/m/02kdv5l
/m/0146pg	/award/award_nominee/award_nominations./award/award_nomination/nominated_for	/m/0f4yh
/m/01rr9f	/award/award_nominee/award_nominations./award/award_nomination/award_nominee	/m/09yrh
/m/05fkf	/location/statistical_region/religions./location/religion_percentage/religion	/m/051kv
/m/026w_gk	/award/award_nominee/award_nominations./award/award_nomination/nominated_for	/m/0d68qy
/m/020fgy	/award/award_nominee/award_nominations./award/award_nomination/nominated_for	/m/0c0yh4
/m/0bv7t	/people/person/gender	/m/02zsn
/m/01psyx	/people/cause_of_death/people	/m/01_4z
/m/041738	/music/genre/artists	/m/05k79
/m/01p8r8	/people/person/profession	/m/02hrh1q
/m/03t22m	/music/performance_role/regular_performances./music/group_membership/role	/m/07c6l
/m/027dtv3	/award/award_nominee/award_nominations./award/award_nomination/award_nominee	/m/0fx0mw
/m/0lzcs	/people/person/religion	/m/01ld4n
/m/01trtc	/music/record_label/artist	/m/016szr
/m/01g03q	/award/award_winning_work/awards_won./award/award_honor/award	/m/0cqh6z
/m/03swmf	/people/deceased_person/place_of_death	/m/02_286
/m/02hsq3m	/award/award_category/nominees./award/award_nomination/nominated_for	/m/08phg9
/m/01vj9c	/music/performance_role/regular_performances./music/group_membership/group	/m/013rfk
/m/02v49c	/people/person/profession	/m/02hrh1q
/m/02bqmq	/government/legislative_session/members./government/government_position_held/district_represented	/m/05tbn
/m/01nm3s	/film/actor/film./film/performance/film	/m/07bwr
/m/02qk2d5	/sports/sports_team/sport	/m/039yzs
/m/07q1m	/film/film/music	/m/01x1fq
/m/0kjgl	/award/award_winner/awards_won./award/award_honor/award_winner	/m/0gdqy
/m/099c8n	/award/award_category/nominees./award/award_nomination/nominated_for	/m/09r94m
/m/02xv8m	/award/award_nominee/award_nominations./award/award_nomination/nominated_for	/m/02vqsll
/m/06r1k	/tv/tv_program/regular_cast./tv/regular_tv_appearance/actor	/m/0f13b
/m/017fp	/media_common/netflix_genre/titles	/m/01wb95
/m/03wjb7	/people/person/profession	/m/02hrh1q
/m/07s6fsf	/education/educational_degree/people_with_this_degree./education/education/institution	/m/02mzg9
/m/07s6fsf	/education/educational_degree/people_with_this_degree./education/education/institution	/m/01pq4w
/m/02chhq	/film/film/other_crew./film/film_crew_gig/film_crew_role	/m/09zzb8
/m/014zcr	/people/person/profession	/m/02jknp
/m/0fg04	/film/film/production_companies	/m/02jd_7
/m/04vs9	/organization/organization_member/member_of./organization/organization_membership/organization	/m/0b6css
/m/07k2d	/dataworld/gardening_hint/split_to	/m/07l1c
/m/05bt6j	/music/genre/artists	/m/02qwg
/m/01tv3x2	/music/artist/track_contributions./music/track_contribution/role	/m/01v8y9
/m/0jvt9	/award/ranked_item/appears_in_ranked_lists./award/ranking/list	/m/05glt
/m/01pkhw	/film/actor/film./film/performance/film	/m/047qxs
/m/03x6w8	/sports/sports_team/colors	/m/06fvc
/m/0g1rw	/film/film_distributor/films_distributed./film/film_film_distributor_relationship/film	/m/08720
/m/01w56k	/music/record_label/artist	/m/01p95y0
/m/025jfl	/film/film_distributor/films_distributed./film/film_film_distributor_relationship/film	/m/021y7yw
/m/0478__m	/award/award_nominee/award_nominations./award/award_nomination/award_nominee	/m/01vw20_
/m/0dzf_	/film/actor/film./film/performance/film	/m/04kkz8
/m/01sl1q	/award/award_nominee/award_nominations./award/award_nomination/award_nominee	/m/03_wvl
/m/04zn7g	/people/person/sibling_s./people/sibling_relationship/sibling	/m/0sz28
/m/03_3d	/location/statistical_region/places_exported_to./location/imports_and_exports/exported_to	/m/01f08r
/m/02g0rb	/people/person/places_lived./people/place_lived/location	/m/02_286
/m/01sp81	/award/award_nominee/award_nominations./award/award_nomination/award_nominee	/m/06j8wx
/m/0bxtg	/award/award_nominee/award_nominations./award/award_nomination/nominated_for	/m/0c00zd0
/m/01w61th	/people/person/profession	/m/02hrh1q
/m/025vldk	/award/award_winner/awards_won./award/award_honor/award_winner	/m/050023
/m/02qrv7	/film/film/language	/m/04306rv
/m/01dyk8	/organization/organization/headquarters./location/mailing_address/state_province_region	/m/01kk32
/m/0c1ps1	/people/person/profession	/m/02hrh1q
/m/04pnx	/location/location/partially_contains	/m/0261m
/m/02jjdr	/music/record_label/artist	/m/016vn3
/m/04mcw4	/film/film/language	/m/04306rv
/m/0cvkv5	/award/award_winning_work/awards_won./award/award_honor/award	/m/0fm3nb
/m/0bkv0	/base/aareas/schema/administrative_area/administrative_parent	/m/09krp
/m/02z13jg	/award/award_category/winners./award/award_honor/award_winner	/m/015np0
/m/03bdm4	/people/person/profession	/m/02jknp
/m/0372j5	/film/film/featured_film_locations	/m/0d1qn
/m/026z9	/music/genre/artists	/m/017lb_
/m/0cb1ky	/people/person/gender	/m/02zsn
/m/01dtcb	/music/record_label/artist	/m/01kx_81
/m/0306ds	/award/award_nominee/award_nominations./award/award_nomination/award_nominee	/m/0cjsxp
/m/02z13jg	/award/award_category/winners./award/award_honor/award_winner	/m/0sz28
/m/01nm3s	/film/actor/film./film/performance/film	/m/0h03fhx
/m/07vjm	/education/educational_institution/students_graduates./education/education/major_field_of_study	/m/0w7c
/m/04r7p	/people/person/profession	/m/02hrh1q
/m/0h7jp	/base/aareas/schema/administrative_area/administrative_parent	/m/0ck1d
/m/013807	/education/educational_institution/students_graduates./education/education/major_field_of_study	/m/02822
/m/0glt670	/music/genre/artists	/m/07ss8_
/m/042kbj	/people/person/profession	/m/02hrh1q
/m/016yzz	/film/actor/film./film/performance/film	/m/0294zg
/m/012x4t	/music/artist/track_contributions./music/track_contribution/role	/m/01vj9c
/m/0l3h	/location/statistical_region/religions./location/religion_percentage/religion	/m/072w0
/m/01gb54	/film/film_distributor/films_distributed./film/film_film_distributor_relationship/film	/m/04k9y6
/m/03zv9	/sports/sports_league/teams./sports/sports_league_participation/team	/m/049bmk
/m/06r1k	/tv/tv_program/genre	/m/01htzx
/m/0146pg	/award/award_nominee/award_nominations./award/award_nomination/nominated_for	/m/09sr0
/m/047vp1n	/film/film/genre	/m/02b5_l
/m/016clz	/music/genre/artists	/m/03wjb7
/m/0b9l3x	/people/person/place_of_birth	/m/02_286
/m/04x4s2	/people/person/profession	/m/02hrh1q
/m/09l9xt	/sports/pro_athlete/teams./sports/sports_team_roster/team	/m/047fwlg
/m/026kmvf	/soccer/football_player/current_team./sports/sports_team_roster/team	/m/019m9h
/m/09728	/food/food/nutrients./food/nutrition_fact/nutrient	/m/025rw19
/m/0c31_	/people/person/profession	/m/02jknp
/m/033tln	/base/popstra/celebrity/dated./base/popstra/dated/participant	/m/0c4f4
/m/03cyslc	/film/film/featured_film_locations	/m/02_286
/m/03s7h	/business/business_operation/industry	/m/08mh3kd
/m/0jm4b	/sports/sports_team/roster./basketball/basketball_roster_position/position	/m/03558l
/m/03dbww	/award/award_winner/awards_won./award/award_honor/award_winner	/m/01mv_n
/m/02x73k6	/award/award_category/nominees./award/award_nomination/nominated_for	/m/0fy34l
/m/02r0st6	/people/person/place_of_birth	/m/0xn7q
/m/01wgxtl	/award/award_nominee/award_nominations./award/award_nomination/award	/m/02f76h
/m/090gpr	/people/person/gender	/m/02zsn
/m/0fbtm7	/sports/sports_team/roster./american_football/football_roster_position/position	/m/047g8h
/m/017m2y	/base/popstra/celebrity/dated./base/popstra/dated/participant	/m/07g2v
/m/06jrhz	/tv/tv_writer/tv_programs./tv/tv_program_writer_relationship/tv_program	/m/015w8_
/m/0478__m	/award/award_nominee/award_nominations./award/award_nomination/award_nominee	/m/0dvqq
/m/07yklv	/music/genre/artists	/m/02k5sc
/m/01rr9f	/people/person/gender	/m/02zsn
/m/010rvx	/location/location/time_zones	/m/02lcqs
/m/0c408_	/celebrities/celebrity/celebrity_friends./celebrities/friendship/friend	/m/0282x
/m/0284gcb	/tv/tv_producer/programs_produced./tv/tv_producer_term/program	/m/0d68qy
/m/01tsbmv	/film/actor/film./film/performance/film	/m/03y0pn
/m/03v0t	/location/location/adjoin_s./location/adjoining_relationship/adjoins	/m/03s0w
/m/0kv9d3	/film/film/executive_produced_by	/m/02qjpv5
/m/0jm3v	/sports/sports_team/roster./basketball/basketball_roster_position/position	/m/03558l
/m/048yqf	/film/film/genre	/m/02kdv5l
/m/067jsf	/people/person/gender	/m/02zsn
/m/0f7hc	/tv/tv_writer/tv_programs./tv/tv_program_writer_relationship/tv_program	/m/039cq4
/m/05strv	/award/award_winner/awards_won./award/award_honor/award_winner	/m/05ldnp
/m/05qbbfb	/award/award_winning_work/awards_won./award/award_honor/award	/m/04ljl_l
/m/01vsy7t	/award/award_nominee/award_nominations./award/award_nomination/award_nominee	/m/019x62
/m/03cdg	/influence/influence_node/influenced_by	/m/048cl
/m/01dbk6	/award/award_nominee/award_nominations./award/award_nomination/award_nominee	/m/01q9b9
/m/0l12d	/people/person/places_lived./people/place_lived/location	/m/02_286
/m/04nw9	/people/person/gender	/m/02zsn
/m/01t07j	/award/award_nominee/award_nominations./award/award_nomination/award	/m/0gqng
/m/0g1rw	/film/film_distributor/films_distributed./film/film_film_distributor_relationship/film	/m/0jvt9
/m/017149	/award/award_winner/awards_won./award/award_honor/award_winner	/m/0bxtg
/m/0341n5	/award/award_nominee/award_nominations./award/award_nomination/award	/m/0cqh46
/m/0dzf_	/film/actor/film./film/performance/film	/m/03nx8mj
/m/09h4b5	/people/person/profession	/m/02hrh1q
/m/0g768	/music/record_label/artist	/m/0178kd
/m/09h4b5	/celebrities/celebrity/sexual_relationships./celebrities/romantic_relationship/celebrity	/m/06wm0z
/m/09x3r	/olympics/olympic_games/sports	/m/0486tv
/m/018wdw	/award/award_category/nominees./award/award_nomination/nominated_for	/m/02rn00y
/m/0fgg8c	/sports/sports_team/roster./american_football/football_historical_roster_position/position_s	/m/023wyl
/m/03nqnnk	/film/film/release_date_s./film/film_regional_release_date/film_regional_debut_venue	/m/0prpt
/m/0h95927	/film/film/release_date_s./film/film_regional_release_date/film_release_region	/m/01pj7
/m/0827d	/music/genre/artists	/m/0565cz
/m/03q3sy	/award/award_nominee/award_nominations./award/award_nomination/nominated_for	/m/02hct1
/m/026rm_y	/award/award_nominee/award_nominations./award/award_nomination/award	/m/099jhq
/m/0cwfgz	/award/award_winning_work/awards_won./award/award_honor/honored_for	/m/074rg9
/m/04ns3gy	/award/award_nominee/award_nominations./award/award_nomination/award_nominee	/m/08cn_n
/m/06mt91	/base/popstra/celebrity/friendship./base/popstra/friendship/participant	/m/03y82t6
/m/01qb5d	/film/film/featured_film_locations	/m/02_286
/m/06zd1c	/people/person/place_of_birth	/m/0dyl9
/m/0fg04	/film/film/other_crew./film/film_crew_gig/film_crew_role	/m/02rh1dz
/m/070w7s	/award/award_nominee/award_nominations./award/award_nomination/award	/m/02q1tc5
/m/0296rz	/film/film/featured_film_locations	/m/02_286
/m/07s2s	/film/film_subject/films	/m/01k1k4
/m/030wkp	/people/person/profession	/m/018gz8
/m/01wgxtl	/award/award_nominee/award_nominations./award/award_nomination/award_nominee	/m/07ss8_
/m/0h1p	/award/award_nominee/award_nominations./award/award_nomination/award	/m/02x4wr9
/m/01vj9c	/music/performance_role/track_performances./music/track_contribution/role	/m/07c6l
/m/02g0rb	/award/award_nominee/award_nominations./award/award_nomination/nominated_for	/m/0yyn5
/m/023p7l	/film/film/production_companies	/m/01795t
/m/01vj9c	/music/performance_role/regular_performances./music/group_membership/role	/m/07xzm
/m/08phg9	/film/film/other_crew./film/film_crew_gig/film_crew_role	/m/02rh1dz
/m/02r22gf	/award/award_category/nominees./award/award_nomination/nominated_for	/m/050r1z
/m/06j6l	/music/genre/artists	/m/01kx_81
/m/04gm7n	/music/record_label/artist	/m/03f4xvm
/m/01wzlxj	/award/award_nominee/award_nominations./award/award_nomination/award	/m/01cky2
/m/05jcn8	/people/person/profession	/m/02jknp
/m/01wgxtl	/people/person/profession	/m/02hrh1q
/m/061xq	/baseball/baseball_team/team_stats./baseball/baseball_team_stats/season	/m/02h7s73
/m/01nr63	/award/award_nominee/award_nominations./award/award_nomination/award	/m/04ljl_l
/m/0565cz	/music/artist/track_contributions./music/track_contribution/role	/m/02k856
/m/04n3l	/location/location/adjoin_s./location/adjoining_relationship/adjoins	/m/02_286
/m/01jr4j	/award/award_nominated_work/award_nominations./award/award_nomination/nominated_for	/m/05z7c
/m/0gg4h	/people/cause_of_death/people	/m/0jrny
/m/025v1sx	/sports/sports_team/colors	/m/06fvc
/m/01wv9p	/base/popstra/celebrity/friendship./base/popstra/friendship/participant	/m/0bbf1f
/m/02g_6x	/sports/sports_position/players./sports/sports_team_roster/team	/m/03gqb0k
/m/033gn8	/education/educational_institution/students_graduates./education/education/student	/m/02jt1k
/m/06z68	/olympics/olympic_sport/athletes./olympics/olympic_athlete_affiliation/country	/m/03_3d
/m/0g5lhl7	/tv/tv_network/programs./tv/tv_network_duration/program	/m/05z43v
/m/0f6_4	/location/location/adjoin_s./location/adjoining_relationship/adjoins	/m/0f63n
/m/01rgn3	/education/educational_institution/students_graduates./education/education/major_field_of_study	/m/05r79
/m/01hl_w	/education/university/international_tuition./measurement_unit/dated_money_value/currency	/m/0kz1h
/m/0g4vmj8	/film/film/release_date_s./film/film_regional_release_date/film_release_region	/m/01gfhk
/m/0486tv	/olympics/olympic_sport/athletes./olympics/olympic_athlete_affiliation/country	/m/07dvs
/m/0fn8jc	/people/person/profession	/m/02hrh1q
/m/01kb2j	/people/person/gender	/m/02zsn
/m/016h4r	/base/popstra/celebrity/dated./base/popstra/dated/participant	/m/03f2_rc
/m/03lgg	/people/person/profession	/m/018gz8
/m/05v45k	/people/person/places_lived./people/place_lived/location	/m/0vmt
/m/026v437	/award/award_winner/awards_won./award/award_honor/award_winner	/m/03w1v2
/m/0q9jk	/award/award_winning_work/awards_won./award/award_honor/award_winner	/m/02qlkc3
/m/04r7p	/award/award_winner/awards_won./award/award_honor/award_winner	/m/0bdt8
/m/0f4dx2	/award/award_winner/awards_won./award/award_honor/award_winner	/m/02tr7d
/m/01j590z	/music/group_member/membership./music/group_membership/group	/m/0ycfj
/m/05nqz	/military/military_conflict/combatants./military/military_combatant_group/combatants	/m/01rdm0
/m/026f__m	/award/award_winning_work/awards_won./award/award_honor/award_winner	/m/0f7hc
/m/08pth9	/film/actor/film./film/performance/film	/m/0c57yj
/m/09mfvx	/film/film_distributor/films_distributed./film/film_film_distributor_relationship/film	/m/0d8w2n
/m/05gnf	/tv/tv_network/programs./tv/tv_network_duration/program	/m/0bsxd3
/m/0n6f8	/award/award_nominee/award_nominations./award/award_nomination/nominated_for	/m/05jzt3
/m/0glt670	/music/genre/artists	/m/01wgxtl
/m/01hmk9	/people/person/places_lived./people/place_lived/location	/m/0sf9_
/m/027dtxw	/award/award_category/nominees./award/award_nomination/nominated_for	/m/02pjc1h
/m/0fgg8c	/sports/sports_team/roster./american_football/football_historical_roster_position/position_s	/m/02g_6x
/m/0bxtg	/award/award_nominee/award_nominations./award/award_nomination/award_nominee	/m/02ldv0
/m/04fkg4	/people/person/profession	/m/02jknp
/m/0sz28	/people/person/profession	/m/02hrh1q
/m/03j43	/influence/influence_node/influenced_by	/m/01lwx
/m/02chhq	/film/film/genre	/m/017fp
/m/011k_j	/music/performance_role/guest_performances./music/recording_contribution/performance_role	/m/026g73
/m/02xcb6n	/award/award_category/winners./award/award_honor/award_winner	/m/05ldnp
/m/02fqxm	/award/award_nominated_work/award_nominations./award/award_nomination/nominated_for	/m/02rq8k8
/m/01vsnff	/award/award_nominee/award_nominations./award/award_nomination/award	/m/02wh75
/m/04h6mm	/award/award_nominee/award_nominations./award/award_nomination/award_nominee	/m/04zwtdy
/m/027kwc	/award/award_nominee/award_nominations./award/award_nomination/award	/m/01c427
/m/06wm0z	/award/award_nominee/award_nominations./award/award_nomination/award_nominee	/m/09h4b5
/m/0dln8jk	/film/film/other_crew./film/film_crew_gig/film_crew_role	/m/09zzb8
/m/01l2b3	/film/film/genre	/m/02b5_l
/m/035bcl	/film/film/other_crew./film/film_crew_gig/film_crew_role	/m/09zzb8
/m/0341n5	/award/award_nominee/award_nominations./award/award_nomination/award_nominee	/m/050zr4
/m/07w0v	/education/educational_institution/students_graduates./education/education/student	/m/01j851
/m/050r1z	/award/award_winning_work/awards_won./award/award_honor/award	/m/02r0csl
/m/0dwtp	/music/instrument/instrumentalists	/m/0137g1
/m/0134w7	/people/person/profession	/m/02hrh1q
/m/0b_dh	/people/person/profession	/m/02jknp
/m/012gq6	/award/award_nominee/award_nominations./award/award_nomination/award	/m/01c427
/m/0btpm6	/film/film/release_date_s./film/film_regional_release_date/film_release_region	/m/06bnz
/m/03ckfl9	/music/genre/artists	/m/01386_
/m/01y3v	/american_football/football_team/current_roster./sports/sports_team_roster/position	/m/047g8h
/m/03wnh	/sports/sports_team/roster./american_football/football_roster_position/position	/m/023wyl
/m/0f7hc	/base/popstra/celebrity/dated./base/popstra/dated/participant	/m/03knl
/m/04gvt5	/people/person/gender	/m/02zsn
/m/03548	/organization/organization_member/member_of./organization/organization_membership/organization	/m/0gkjy
/m/090gpr	/people/person/profession	/m/02hrh1q
/m/08624h	/people/person/place_of_birth	/m/0dlv0
/m/01pq4w	/education/educational_institution/students_graduates./education/education/student	/m/01h5f8
/m/02cx90	/award/award_nominee/award_nominations./award/award_nomination/award_nominee	/m/0249kn
/m/07s6fsf	/education/educational_degree/people_with_this_degree./education/education/institution	/m/02yxjs
/m/025mb_	/film/actor/film./film/performance/film	/m/0421v9q
/m/0362q0	/people/person/profession	/m/02hrh1q
/m/0p_r5	/people/person/place_of_birth	/m/01_d4
/m/04wmvz	/baseball/baseball_team/team_stats./baseball/baseball_team_stats/season	/m/027mvrc
/m/06ztvyx	/film/film/release_date_s./film/film_regional_release_date/film_release_region	/m/03_3d
/m/09p2r9	/award/award_ceremony/awards_presented./award/award_honor/honored_for	/m/02hct1
/m/02x2gy0	/award/award_category/nominees./award/award_nomination/nominated_for	/m/07z6xs
/m/07h1q	/influence/influence_node/influenced_by	/m/02wh0
/m/07c6l	/music/performance_role/regular_performances./music/group_membership/group	/m/014pg1
/m/01xyqk	/music/record_label/artist	/m/0411q
/m/0dwtp	/music/performance_role/regular_performances./music/group_membership/role	/m/07xzm
/m/0g1rw	/film/film_distributor/films_distributed./film/film_film_distributor_relationship/film	/m/04v8x9
/m/02cx90	/award/award_winner/awards_won./award/award_honor/award_winner	/m/051m56
/m/03wbqc4	/film/film/produced_by	/m/02tn0_
/m/05tk7y	/people/person/profession	/m/02hrh1q
/m/0jqd3	/film/film/featured_film_locations	/m/02_286
/m/03rl1g	/government/legislative_session/members./government/government_position_held/legislative_sessions	/m/01gtdd
/m/01l4zqz	/award/award_nominee/award_nominations./award/award_nomination/award_nominee	/m/01qkqwg
/m/03hmt9b	/film/film/genre	/m/01j1n2
/m/01qb5d	/film/film/genre	/m/02kdv5l
/m/023s8	/award/award_winner/awards_won./award/award_honor/award_winner	/m/01pcz9
/m/0cvkv5	/film/film/genre	/m/01t_vv
/m/02cx90	/award/award_nominee/award_nominations./award/award_nomination/award_nominee	/m/0m_31
/m/05mv4	/education/educational_institution/colors	/m/03wkwg
/m/03j24kf	/award/award_nominee/award_nominations./award/award_nomination/award	/m/01ck6v
/m/0cv3w	/base/popstra/location/vacationers./base/popstra/vacation_choice/vacationer	/m/0bksh
/m/033g4d	/film/film/featured_film_locations	/m/0cv3w
/m/09q5w2	/film/film/genre	/m/082gq
/m/01ycbq	/award/award_nominee/award_nominations./award/award_nomination/award	/m/02x73k6
/m/0bscw	/film/film/other_crew./film/film_crew_gig/film_crew_role	/m/09zzb8
/m/07ncs0	/people/person/profession	/m/02hrh1q
/m/03q5t	/music/instrument/instrumentalists	/m/032t2z
/m/0p_2r	/award/award_nominee/award_nominations./award/award_nomination/award_nominee	/m/026w_gk
/m/02vk52z	/base/schemastaging/organization_extra/phone_number./base/schemastaging/phone_sandbox/service_language	/m/05zjd
/m/0dgskx	/award/award_nominee/award_nominations./award/award_nomination/award	/m/0fbvqf
/m/04dyqk	/people/person/profession	/m/02hrh1q
/m/0kjgl	/award/award_nominee/award_nominations./award/award_nomination/award_nominee	/m/01tnxc
/m/09v7wsg	/award/award_category/nominees./award/award_nomination/nominated_for	/m/0ddd0gc
/m/0g768	/music/record_label/artist	/m/0b_xm
/m/06n7h7	/award/award_nominee/award_nominations./award/award_nomination/nominated_for	/m/05gnf
/m/01gvyp	/film/actor/film./film/performance/film	/m/0n6ds
/m/03hmt9b	/award/award_winning_work/awards_won./award/award_honor/award	/m/099c8n
/m/062yh9	/people/person/place_of_birth	/m/02_286
/m/099c8n	/award/award_category/nominees./award/award_nomination/nominated_for	/m/011yth
/m/0bcp9b	/film/film/language	/m/04306rv
/m/0kcd5	/tv/tv_network/programs./tv/tv_network_duration/program	/m/01j95
/m/091yn0	/award/award_nominee/award_nominations./award/award_nomination/award_nominee	/m/0p_2r
/m/07gxw	/music/genre/artists	/m/0k60
/m/016khd	/award/award_nominee/award_nominations./award/award_nomination/nominated_for	/m/02rcwq0
/m/03f2_rc	/award/award_nominee/award_nominations./award/award_nomination/award	/m/02qvyrt
/m/02prw4h	/award/award_winning_work/awards_won./award/award_honor/award_winner	/m/06l9n8
/m/02pq9yv	/award/award_nominee/award_nominations./award/award_nomination/nominated_for	/m/06w99h3
/m/047q2wc	/award/award_nominee/award_nominations./award/award_nomination/award_nominee	/m/01k70_
/m/0bh8x1y	/film/film/release_date_s./film/film_regional_release_date/film_release_region	/m/047lj
/m/01dtcb	/music/record_label/artist	/m/0d193h
/m/016qtt	/people/person/profession	/m/02hrh1q
/m/0bc773	/award/award_ceremony/awards_presented./award/award_honor/award_winner	/m/05kfs
/m/0cl_m	/people/person/employment_history./business/employment_tenure/company	/m/01pl14
/m/051hrr	/music/performance_role/regular_performances./music/group_membership/role	/m/0dwtp
/m/01fmys	/film/film/release_date_s./film/film_regional_release_date/film_release_region	/m/02k54
/m/0m63c	/film/film/release_date_s./film/film_regional_release_date/film_release_region	/m/06bnz
/m/01c427	/award/award_category/winners./award/award_honor/award_winner	/m/01l3mk3
/m/09p2r9	/award/award_ceremony/awards_presented./award/award_honor/award_winner	/m/01j5ts
/m/0bdt8	/people/person/profession	/m/02hrh1q
/m/0738y5	/people/person/profession	/m/02jknp
/m/047qxs	/film/film/other_crew./film/film_crew_gig/film_crew_role	/m/09zzb8
/m/017fp	/media_common/netflix_genre/titles	/m/02r1c18
/m/03w1v2	/award/award_winner/awards_won./award/award_honor/award_winner	/m/027dtv3
/m/0jbyg	/people/person/places_lived./people/place_lived/location	/m/02_286
/m/0cnl80	/people/person/profession	/m/02hrh1q
/m/05c74	/organization/organization_member/member_of./organization/organization_membership/organization	/m/07t65
/m/03ym1	/award/award_nominee/award_nominations./award/award_nomination/award_nominee	/m/024n3z
/m/0164nb	/film/actor/film./film/performance/film	/m/03vfr_
/m/01shy7	/film/film/release_date_s./film/film_regional_release_date/film_release_region	/m/02k54
/m/0j871	/music/performance_role/guest_performances./music/recording_contribution/performance_role	/m/0j862
/m/02qvyrt	/award/award_category/nominees./award/award_nomination/nominated_for	/m/015qsq
/m/01f6zc	/award/award_nominee/award_nominations./award/award_nomination/award_nominee	/m/015c4g
/m/0124ld	/user/jg/default_domain/olympic_games/sports	/m/06zgc
/m/01vvlyt	/award/award_nominee/award_nominations./award/award_nomination/award	/m/031b3h
/m/09bymc	/award/award_ceremony/awards_presented./award/award_honor/award_winner	/m/01f2w0
/m/0gtx63s	/film/film/release_date_s./film/film_regional_release_date/film_release_region	/m/03h64
/m/016tbr	/award/award_nominee/award_nominations./award/award_nomination/award_nominee	/m/01rr9f
/m/01vyv9	/award/award_nominee/award_nominations./award/award_nomination/award_nominee	/m/02jsgf
/m/02pjvc	/base/popstra/celebrity/dated./base/popstra/dated/participant	/m/06q5t7
/m/02fn5	/award/award_nominee/award_nominations./award/award_nomination/award	/m/02x73k6
/m/053xw6	/award/award_nominee/award_nominations./award/award_nomination/nominated_for	/m/02pjc1h
/m/0156q	/travel/travel_destination/climate./travel/travel_destination_monthly_climate/month	/m/0ll3
/m/0cbv4g	/film/film/genre	/m/01t_vv
/m/01yhm	/sports/professional_sports_team/draft_picks./sports/sports_league_draft_pick/school	/m/022lly
/m/01yhm	/sports/professional_sports_team/draft_picks./sports/sports_league_draft_pick/school	/m/07w0v
/m/0f6_x	/film/actor/film./film/performance/film	/m/0m63c
/m/031778	/film/film/other_crew./film/film_crew_gig/film_crew_role	/m/0263ycg
/m/025ldg	/people/person/places_lived./people/place_lived/location	/m/0f2s6
/m/0dwt5	/music/performance_role/track_performances./music/track_contribution/role	/m/051hrr
/m/0164nb	/tv/tv_personality/tv_regular_appearances./tv/tv_regular_personal_appearance/program	/m/0cpz4k
/m/0g4pl7z	/film/film/production_companies	/m/01795t
/m/05wh0sh	/government/politician/government_positions_held./government/government_position_held/basic_title	/m/09d6p2
/m/051q5	/american_football/football_team/current_roster./sports/sports_team_roster/position	/m/02g_6x
/m/0513yzt	/people/person/gender	/m/02zsn
/m/01wk7ql	/award/award_nominee/award_nominations./award/award_nomination/award	/m/01c427
/m/02n9k	/influence/influence_node/influenced_by	/m/02yy8
/m/012d40	/people/person/profession	/m/02jknp
/m/0g1rw	/film/film_distributor/films_distributed./film/film_film_distributor_relationship/film	/m/0ckrgs
/m/01vsy95	/music/artist/track_contributions./music/track_contribution/role	/m/01vj9c
/m/0j6b5	/film/film/release_date_s./film/film_regional_release_date/film_release_region	/m/03_3d
/m/0133ch	/base/aareas/schema/administrative_area/administrative_parent	/m/0jcg8
/m/01mhwk	/award/award_ceremony/awards_presented./award/award_honor/award_winner	/m/01q9b9
/m/01zz8t	/film/actor/film./film/performance/film	/m/0yyn5
/m/026g73	/music/performance_role/track_performances./music/track_contribution/role	/m/01w4dy
/m/05z7c	/film/film/release_date_s./film/film_regional_release_date/film_release_region	/m/03_3d
/m/01ycbq	/award/award_nominee/award_nominations./award/award_nomination/nominated_for	/m/0b44shh
/m/05f4m9q	/award/award_category/nominees./award/award_nomination/nominated_for	/m/047csmy
/m/04wmvz	/baseball/baseball_team/team_stats./baseball/baseball_team_stats/season	/m/0dx84s
/m/026z9	/music/genre/artists	/m/0c7ct
/m/0164nb	/people/person/profession	/m/02hrh1q
/m/01pj5q	/award/award_winner/awards_won./award/award_honor/award_winner	/m/01wz01
/m/0cwfgz	/film/film/genre	/m/02kdv5l
/m/099c8n	/award/award_category/nominees./award/award_nomination/nominated_for	/m/083shs
/m/0jsg0m	/people/person/profession	/m/02hrh1q
/m/02h6_6p	/base/aareas/schema/administrative_area/administrative_parent	/m/017v_
/m/0159h6	/people/person/profession	/m/018gz8
/m/016tbr	/celebrities/celebrity/celebrity_friends./celebrities/friendship/friend	/m/09yrh
/m/05cc1	/organization/organization_member/member_of./organization/organization_membership/organization	/m/0b6css
/m/02yy8	/organization/organization_founder/organizations_founded	/m/07t65
/m/0gqmvn	/award/award_category/winners./award/award_honor/ceremony	/m/0gvstc3
/m/03q5t	/music/instrument/instrumentalists	/m/0k7pf
/m/0nzny	/location/location/adjoin_s./location/adjoining_relationship/adjoins	/m/0nz_b
/m/0f7hc	/award/award_nominee/award_nominations./award/award_nomination/nominated_for	/m/039cq4
/m/01f7v_	/people/person/profession	/m/02jknp
/m/01hl_w	/education/university/domestic_tuition./measurement_unit/dated_money_value/currency	/m/0kz1h
/m/046qq	/film/actor/film./film/performance/film	/m/09qycb
/m/03_wvl	/award/award_winner/awards_won./award/award_honor/award_winner	/m/044mm6
/m/0fpv_3_	/film/film/country	/m/06f32
/m/09h4b5	/base/popstra/celebrity/friendship./base/popstra/friendship/participant	/m/0bdxs5
/m/0421v9q	/film/film/release_date_s./film/film_regional_release_date/film_release_region	/m/03h64
/m/0x25q	/film/film/other_crew./film/film_crew_gig/film_crew_role	/m/09zzb8
/m/0c5x_	/education/educational_institution/colors	/m/01l849
/m/0gg5kmg	/film/film/release_date_s./film/film_regional_release_date/film_release_region	/m/03_3d
/m/099jhq	/award/award_category/winners./award/award_honor/award_winner	/m/018db8
/m/0gvstc3	/award/award_ceremony/awards_presented./award/award_honor/award_winner	/m/04s04
/m/0kz2w	/education/educational_institution/students_graduates./education/education/major_field_of_study	/m/05qjt
/m/05rrw9	/government/legislative_session/members./government/government_position_held/district_represented	/m/05fkf
/m/0jqd3	/award/ranked_item/appears_in_ranked_lists./award/ranking/list	/m/05glt
/m/03rl1g	/government/legislative_session/members./government/government_position_held/legislative_sessions	/m/01gtcc
/m/011k_j	/music/performance_role/track_performances./music/track_contribution/role	/m/0dwtp
/m/04mcw4	/film/film/genre	/m/02kdv5l
/m/09728	/food/food/nutrients./food/nutrition_fact/nutrient	/m/0838f
/m/019bnn	/award/award_category/winners./award/award_honor/award_winner	/m/0f7hc
/m/01cwhp	/award/award_nominee/award_nominations./award/award_nomination/award	/m/01c9jp
/m/03nqnnk	/film/film/personal_appearances./film/personal_film_appearance/person	/m/06jzh
/m/09v7wsg	/award/award_category/winners./award/award_honor/ceremony	/m/0gvstc3
/m/0h1p	/award/award_nominee/award_nominations./award/award_nomination/nominated_for	/m/01mgw
/m/0n6f8	/film/actor/film./film/performance/film	/m/04qk12
/m/01gq0b	/film/actor/film./film/performance/film	/m/03bxp5
/m/08815	/education/educational_institution/students_graduates./education/education/student	/m/05kfs
/m/0lbj1	/award/award_nominee/award_nominations./award/award_nomination/award	/m/02wh75
/m/034487	/music/genre/parent_genre	/m/01243b
/m/02x73k6	/award/award_category/nominees./award/award_nomination/nominated_for	/m/0c9k8
/m/0j8f09z	/film/film/release_date_s./film/film_regional_release_date/film_release_region	/m/03h64
/m/0kt64b	/people/person/gender	/m/02zsn
/m/0fbw6	/food/food/nutrients./food/nutrition_fact/nutrient	/m/09gwd
/m/0cjsxp	/award/award_winner/awards_won./award/award_honor/award_winner	/m/01g257
/m/05bnp0	/people/person/place_of_birth	/m/0f04c
/m/0n3g	/location/statistical_region/religions./location/religion_percentage/religion	/m/051kv
/m/01hkhq	/award/award_nominee/award_nominations./award/award_nomination/award_nominee	/m/016gr2
/m/08t7nz	/award/award_nominee/award_nominations./award/award_nomination/award	/m/02hsq3m
/m/05r4w	/location/statistical_region/places_exported_to./location/imports_and_exports/exported_to	/m/04gqr
/m/016jhr	/music/genre/artists	/m/06br6t
/m/04v048	/people/deceased_person/place_of_death	/m/0k_p5
/m/0dwtp	/music/performance_role/track_performances./music/track_contribution/role	/m/0dwvl
/m/039c26	/tv/tv_program/regular_cast./tv/regular_tv_appearance/actor	/m/0f4dx2
/m/02tr7d	/award/award_winner/awards_won./award/award_honor/award_winner	/m/016gr2
/m/03558l	/sports/sports_position/players./sports/sports_team_roster/team	/m/0jm3v
/m/01cycq	/film/film/music	/m/02_33l
/m/04dyqk	/award/award_nominee/award_nominations./award/award_nomination/award	/m/05f4m9q
/m/0j1z8	/organization/organization_member/member_of./organization/organization_membership/organization	/m/07t65
/m/0fsw_7	/award/award_winning_work/awards_won./award/award_honor/award	/m/0gr42
/m/01f1r4	/organization/organization_member/member_of./organization/organization_membership/organization	/m/034h1h
/m/01bn3l	/film/film/music	/m/07qy0b
/m/05gnf	/award/award_winner/awards_won./award/award_honor/award_winner	/m/0gsg7
/m/029m83	/people/person/places_lived./people/place_lived/location	/m/02_286
/m/02r22gf	/award/award_category/nominees./award/award_nomination/nominated_for	/m/01mgw
/m/0g4pl7z	/film/film/release_date_s./film/film_regional_release_date/film_release_region	/m/03_3d
/m/099jhq	/award/award_category/nominees./award/award_nomination/nominated_for	/m/0462hhb
/m/0126t5	/music/genre/artists	/m/06gd4
/m/01lj_c	/award/award_category/winners./award/award_honor/award_winner	/m/05hj_k
/m/05xvj	/baseball/baseball_team/team_stats./baseball/baseball_team_stats/season	/m/0dx84s
/m/03hvk2	/education/educational_institution/colors	/m/06fvc
/m/02lg9w	/award/award_nominee/award_nominations./award/award_nomination/award_nominee	/m/059gkk
/m/02g0rb	/film/actor/film./film/performance/film	/m/02rq8k8
/m/054fvj	/people/person/employment_history./business/employment_tenure/company	/m/05gnf
/m/07wtc	/award/ranked_item/appears_in_ranked_lists./award/ranking/list	/m/09g7thr
/m/02r0csl	/award/award_category/nominees./award/award_nomination/nominated_for	/m/03y0pn
/m/09pj68	/award/award_ceremony/awards_presented./award/award_honor/award_winner	/m/0z4s
/m/027km64	/people/person/profession	/m/02hrh1q
/m/0ddkf	/award/award_nominee/award_nominations./award/award_nomination/award_nominee	/m/0jbyg
/m/043vc	/sports/sports_team/roster./american_football/football_roster_position/position	/m/047g8h
/m/0192hw	/film/film/release_date_s./film/film_regional_release_date/film_release_region	/m/05r4w
/m/03t22m	/music/instrument/instrumentalists	/m/0f0y8
/m/09728	/food/food/nutrients./food/nutrition_fact/nutrient	/m/09gwd
/m/01vyv9	/film/actor/film./film/performance/film	/m/02q7fl9
/m/01gn36	/film/actor/film./film/performance/film	/m/01f39b
/m/02_286	/base/popstra/location/vacationers./base/popstra/vacation_choice/vacationer	/m/0mm1q
/m/0sz28	/base/popstra/celebrity/dated./base/popstra/dated/participant	/m/01x4sb
/m/058z1hb	/people/person/place_of_birth	/m/02_286
/m/01wcp_g	/award/award_winner/awards_won./award/award_honor/award_winner	/m/01wk7ql
/m/0296rz	/film/film/featured_film_locations	/m/068p2
/m/0g1rw	/film/film_distributor/films_distributed./film/film_film_distributor_relationship/film	/m/05sbv3
/m/096f8	/olympics/olympic_sport/athletes./olympics/olympic_athlete_affiliation/country	/m/06bnz
/m/018db8	/award/award_nominee/award_nominations./award/award_nomination/award_nominee	/m/016gr2
/m/026b33f	/tv/tv_program/regular_cast./tv/regular_tv_appearance/actor	/m/0c1ps1
/m/01d8yn	/film/actor/film./film/performance/film	/m/07s846j
/m/0134w7	/people/person/gender	/m/02zsn
/m/015c4g	/award/award_nominee/award_nominations./award/award_nomination/award	/m/02x4w6g
/m/04rjg	/education/field_of_study/students_majoring./education/education/major_field_of_study	/m/04306rv
/m/06c0ns	/award/award_winning_work/awards_won./award/award_honor/honored_for	/m/074rg9
/m/018ndc	/award/award_nominee/award_nominations./award/award_nomination/award	/m/01c427
/m/02vxq9m	/award/award_winning_work/awards_won./award/award_honor/award	/m/018wdw
/m/03gvm3t	/tv/tv_program/regular_cast./tv/regular_tv_appearance/actor	/m/0c7ct
/m/07c0j	/award/award_nominee/award_nominations./award/award_nomination/award	/m/01c9jp
/m/01w272y	/music/artist/origin	/m/0dc95
/m/02404v	/people/person/profession	/m/02jknp
/m/01wz01	/people/person/profession	/m/02hrh1q
/m/08664q	/film/actor/film./film/performance/film	/m/04h41v
/m/02qrwjt	/award/award_category/nominees./award/award_nomination/nominated_for	/m/0c0yh4
/m/0151b0	/music/performance_role/track_performances./music/track_contribution/role	/m/01w4dy
/m/09m6kg	/award/award_winning_work/awards_won./award/award_honor/award	/m/099c8n
/m/02hsq3m	/award/award_category/winners./award/award_honor/ceremony	/m/0h_cssd
/m/04wmvz	/sports/sports_team/colors	/m/06fvc
/m/0h21v2	/award/award_winning_work/awards_won./award/award_honor/award	/m/02hsq3m
/m/029m83	/film/actor/film./film/performance/film	/m/0k4p0
/m/03g62	/people/person/profession	/m/02jknp
/m/0sz28	/base/popstra/celebrity/friendship./base/popstra/friendship/participant	/m/020hh3
/m/0hm4q	/business/job_title/people_with_this_title./business/employment_tenure/company	/m/0h6rm
/m/02qvdc	/sports/sports_position/players./sports/sports_team_roster/team	/m/0jnpv
/m/02z1nbg	/award/award_category/winners./award/award_honor/award_winner	/m/01kb2j
/m/0ddd0gc	/award/award_winning_work/awards_won./award/award_honor/award_winner	/m/01x4sb
/m/05dxl5	/award/award_nominee/award_nominations./award/award_nomination/award_nominee	/m/058ncz
/m/02ln0f	/education/educational_institution/students_graduates./education/education/student	/m/014zcr
/m/02j4sk	/film/actor/film./film/performance/film	/m/031t2d
/m/015y3j	/education/educational_institution/students_graduates./education/education/student	/m/042fk
/m/0mwsh	/location/us_county/county_seat	/m/0fvzz
/m/031hcx	/film/film/story_by	/m/042xh
/m/02pvqmz	/tv/tv_program/genre	/m/09lmb
/m/0l14v3	/music/performance_role/track_performances./music/track_contribution/role	/m/0l1589
/m/09rvwmy	/film/film/featured_film_locations	/m/027kp3
/m/03hvk2	/education/educational_institution/students_graduates./education/education/student	/m/0c9xjl
/m/016clz	/music/genre/artists	/m/01nkxvx
/m/02pw_n	/film/film/genre	/m/01t_vv
/m/02xh1	/media_common/netflix_genre/titles	/m/0hv4t
/m/016gr2	/award/award_winner/awards_won./award/award_honor/award_winner	/m/02tr7d
/m/0n5fz	/location/location/contains	/m/0xn5b
/m/02yvhx	/award/award_ceremony/awards_presented./award/award_honor/honored_for	/m/09m6kg
/m/09f2j	/education/educational_institution/students_graduates./education/education/student	/m/01_rh4
/m/070m12	/award/award_nominee/award_nominations./award/award_nomination/award	/m/02q1tc5
/m/0f4k49	/film/film/release_date_s./film/film_regional_release_date/film_release_region	/m/06bnz
/m/0mrs1	/location/location/adjoin_s./location/adjoining_relationship/adjoins	/m/0d1xh
/m/01qn8k	/people/person/places_lived./people/place_lived/location	/m/02_286
/m/08720	/award/award_winning_work/awards_won./award/award_honor/award	/m/02r22gf
/m/0fbw6	/food/food/nutrients./food/nutrition_fact/nutrient	/m/0g5gq
/m/01rr9f	/award/award_nominee/award_nominations./award/award_nomination/award_nominee	/m/016tbr
/m/047svrl	/film/film/release_date_s./film/film_regional_release_date/film_release_region	/m/02k54
/m/021yc7p	/award/award_nominee/award_nominations./award/award_nomination/award_nominee	/m/027y151
/m/01hb1t	/organization/organization/headquarters./location/mailing_address/citytown	/m/02_286
/m/02c638	/award/award_winning_work/awards_won./award/award_honor/award	/m/099jhq
/m/017fp	/media_common/netflix_genre/titles	/m/048xyn
/m/0dg3jz	/award/award_nominee/award_nominations./award/award_nomination/nominated_for	/m/0kvb6p
/m/07kb5	/user/alexander/philosophy/philosopher/interests	/m/05r79
/m/0glt670	/music/genre/artists	/m/01vz0g4
/m/01w61th	/award/award_nominee/award_nominations./award/award_nomination/award	/m/02w7fs
/m/0gltv	/film/film/music	/m/0146pg
/m/016szr	/award/award_winner/awards_won./award/award_honor/award_winner	/m/01309x
/m/04ljl_l	/award/award_category/nominees./award/award_nomination/nominated_for	/m/025s1wg
/m/01grp0	/government/legislative_session/members./government/government_position_held/district_represented	/m/05fkf
/m/02_hj4	/film/actor/film./film/performance/film	/m/031t2d
/m/034b6k	/film/film/other_crew./film/film_crew_gig/film_crew_role	/m/09zzb8
/m/0flbm	/location/location/adjoin_s./location/adjoining_relationship/adjoins	/m/0p0fc
/m/0rqf1	/base/popstra/location/vacationers./base/popstra/vacation_choice/vacationer	/m/026c1
/m/016clz	/music/genre/artists	/m/01w8n89
/m/015t7v	/award/award_nominee/award_nominations./award/award_nomination/award_nominee	/m/0241jw
/m/016clz	/music/genre/artists	/m/016qtt
/m/0c00zd0	/film/film/produced_by	/m/0415svh
/m/099c8n	/award/award_category/nominees./award/award_nomination/nominated_for	/m/0fy34l
/m/0d1swh	/soccer/football_player/current_team./sports/sports_team_roster/team	/m/015_z1
/m/0cqh46	/award/award_category/nominees./award/award_nomination/nominated_for	/m/02py4c8
/m/0cq7kw	/film/film/story_by	/m/03cdg
/m/022h5x	/education/educational_degree/people_with_this_degree./education/education/institution	/m/07vyf
/m/0sf9_	/location/capital_of_administrative_division/capital_of./location/administrative_division_capital_relationship/administrative_division	/m/0nv2x
/m/03115z	/language/human_language/countries_spoken_in	/m/03h64
/m/057xs89	/award/award_category/nominees./award/award_nomination/nominated_for	/m/03lrht
/m/02qvl7	/sports/sports_position/players./sports/sports_team_roster/team	/m/0j8cb
/m/0qdyf	/award/award_nominee/award_nominations./award/award_nomination/award_nominee	/m/01vvlyt
/m/0py5b	/people/person/profession	/m/02jknp
/m/01tnxc	/award/award_nominee/award_nominations./award/award_nomination/award	/m/02x4w6g
/m/031778	/film/film/other_crew./film/film_crew_gig/film_crew_role	/m/09zzb8
/m/04gknr	/film/film/other_crew./film/film_crew_gig/film_crew_role	/m/09zzb8
/m/0dwxr	/olympics/olympic_sport/athletes./olympics/olympic_athlete_affiliation/country	/m/05r4w
/m/099c8n	/award/award_category/nominees./award/award_nomination/nominated_for	/m/0h03fhx
/m/03tcbx	/government/legislative_session/members./government/government_position_held/legislative_sessions	/m/07p__7
/m/017l96	/music/record_label/artist	/m/01tl50z
/m/02hsq3m	/award/award_category/nominees./award/award_nomination/nominated_for	/m/04mcw4
/m/033srr	/film/film/other_crew./film/film_crew_gig/film_crew_role	/m/09zzb8
/m/0cymp	/location/location/adjoin_s./location/adjoining_relationship/adjoins	/m/0m2fr
/m/01d8yn	/award/award_nominee/award_nominations./award/award_nomination/nominated_for	/m/0c0nhgv
/m/0p_qr	/film/film/genre	/m/082gq
/m/01fc7p	/film/film_subject/films	/m/01znj1
/m/034cj9	/people/person/profession	/m/02hrh1q
/m/017m2y	/people/person/spouse_s./people/marriage/spouse	/m/0zjpz
/m/0ksrf8	/award/award_nominee/award_nominations./award/award_nomination/award_nominee	/m/01pkhw
/m/025rvx0	/film/film/language	/m/03115z
/m/01kp66	/award/award_nominee/award_nominations./award/award_nomination/award_nominee	/m/0c3p7
/m/0cz8mkh	/film/film/production_companies	/m/024rgt
/m/01vyv9	/people/person/profession	/m/02hrh1q
/m/01kx_81	/people/person/profession	/m/02hrh1q
/m/01_4z	/people/person/religion	/m/051kv
/m/02822	/education/field_of_study/students_majoring./education/education/student	/m/01vwllw
/m/02cx90	/award/award_nominee/award_nominations./award/award_nomination/award_nominee	/m/01qkqwg
/m/07t3x8	/people/person/places_lived./people/place_lived/location	/m/01zxx9
/m/07gxw	/music/genre/parent_genre	/m/0mmp3
/m/0209xj	/film/film/language	/m/04306rv
/m/05_pkf	/people/person/profession	/m/01c8w0
/m/03f1zhf	/people/person/places_lived./people/place_lived/location	/m/02_286
/m/0mhdz	/location/location/adjoin_s./location/adjoining_relationship/adjoins	/m/0f04v
/m/01vw87c	/people/person/spouse_s./people/marriage/location_of_ceremony	/m/0cv3w
/m/01rtm4	/education/educational_institution/students_graduates./education/education/student	/m/02rchht
/m/0z4s	/award/award_nominee/award_nominations./award/award_nomination/award_nominee	/m/06151l
/m/01mgw	/film/film/country	/m/03h64
/m/026v437	/award/award_winner/awards_won./award/award_honor/award_winner	/m/040981l
/m/05tbn	/location/location/contains	/m/03fmfs
/m/091yn0	/award/award_nominee/award_nominations./award/award_nomination/nominated_for	/m/039cq4
/m/0g9zjp	/soccer/football_player/current_team./sports/sports_team_roster/team	/m/02ryyk
/m/01p8s	/sports/sports_team_location/teams	/m/03zb6t
/m/07q1m	/film/film/genre	/m/017fp
/m/04954	/award/award_nominee/award_nominations./award/award_nomination/award	/m/057xs89
/m/01gtcc	/government/legislative_session/members./government/government_position_held/district_represented	/m/03v0t
/m/044qx	/base/popstra/celebrity/friendship./base/popstra/friendship/participant	/m/0cgbf
/m/04ftdq	/education/educational_institution/students_graduates./education/education/student	/m/069ld1
/m/0bx0l	/film/film/other_crew./film/film_crew_gig/film_crew_role	/m/09zzb8
/m/02j4sk	/people/person/profession	/m/02hrh1q
/m/0h6rm	/education/educational_institution/students_graduates./education/education/student	/m/01lwx
/m/01cky2	/award/award_category/winners./award/award_honor/award_winner	/m/024qwq
/m/01mgw	/award/award_winning_work/awards_won./award/award_honor/award_winner	/m/0h1p
/m/027vps	/people/person/places_lived./people/place_lived/location	/m/02_286
/m/02pt6k_	/award/award_winner/awards_won./award/award_honor/award_winner	/m/047q2wc
/m/0glt670	/music/genre/artists	/m/01vrt_c
/m/03knl	/people/person/profession	/m/02hrh1q
/m/04n32	/people/person/place_of_birth	/m/0f2tj
/m/04yt7	/award/award_nominee/award_nominations./award/award_nomination/award	/m/0262s1
/m/012x7b	/music/genre/parent_genre	/m/0126t5
/m/02g_6x	/sports/sports_position/players./sports/sports_team_roster/team	/m/043vc
/m/03cvvlg	/film/film/other_crew./film/film_crew_gig/film_crew_role	/m/09zzb8
/m/04q01mn	/film/film/executive_produced_by	/m/0glyyw
/m/02tr7d	/award/award_nominee/award_nominations./award/award_nomination/award_nominee	/m/03w1v2
/m/03rl1g	/government/legislative_session/members./government/government_position_held/district_represented	/m/03v0t
/m/016jhr	/music/genre/artists	/m/067mj
/m/0137g1	/award/award_nominee/award_nominations./award/award_nomination/award	/m/01ck6v
/m/0263tn1	/award/award_nominee/award_nominations./award/award_nomination/award_nominee	/m/06ns98
/m/05bt6j	/music/genre/artists	/m/015cqh
/m/017m2y	/people/person/profession	/m/02hrh1q
/m/063lqs	/award/award_winner/awards_won./award/award_honor/award_winner	/m/050023
/m/03gqb0k	/american_football/football_team/current_roster./sports/sports_team_roster/position	/m/023wyl
/m/0cc846d	/film/film/other_crew./film/film_crew_gig/film_crew_role	/m/09zzb8
/m/0m24v	/base/aareas/schema/administrative_area/administrative_parent	/m/0vmt
/m/09qs08	/award/award_category/nominees./award/award_nomination/nominated_for	/m/0q9jk
/m/09jm8	/award/award_nominee/award_nominations./award/award_nomination/award	/m/02f73p
/m/018wdw	/award/award_category/nominees./award/award_nomination/nominated_for	/m/0h03fhx
/m/047svrl	/film/film/music	/m/02qfhb
/m/017j69	/organization/organization/headquarters./location/mailing_address/state_province_region	/m/03v0t
/m/01wyz92	/people/person/profession	/m/02hrh1q
/m/05zksls	/award/award_ceremony/awards_presented./award/award_honor/award_winner	/m/04znsy
/m/0284gcb	/award/award_nominee/award_nominations./award/award_nomination/nominated_for	/m/02hct1
/m/0261m	/location/location/contains	/m/0n3g
/m/020fgy	/award/award_nominee/award_nominations./award/award_nomination/award_nominee	/m/025cn2
/m/0f0y8	/people/person/places_lived./people/place_lived/location	/m/05fkf
/m/071tyz	/education/educational_degree/people_with_this_degree./education/education/institution	/m/07vk2
/m/01vj9c	/music/performance_role/regular_performances./music/group_membership/group	/m/0b_xm
/m/02wt0	/location/statistical_region/places_exported_to./location/imports_and_exports/exported_to	/m/07fsv
/m/01cwhp	/people/person/places_lived./people/place_lived/location	/m/0cv3w
/m/0fztbq	/award/award_nominated_work/award_nominations./award/award_nomination/nominated_for	/m/0g5pvv
/m/03hmt9b	/award/award_winning_work/awards_won./award/award_honor/award	/m/02r22gf
/m/026v437	/award/award_nominee/award_nominations./award/award_nomination/award_nominee	/m/0cjsxp
/m/0gr42	/award/award_category/nominees./award/award_nomination/nominated_for	/m/0btpm6
/m/02w7gg	/people/ethnicity/people	/m/04yt7
/m/05bt6j	/music/genre/artists	/m/01k98nm
/m/0bksh	/award/award_nominee/award_nominations./award/award_nomination/award_nominee	/m/0f7hc
/m/0fsw_7	/award/award_nominated_work/award_nominations./award/award_nomination/nominated_for	/m/01kf3_9
/m/05bt6j	/music/genre/artists	/m/01vrt_c
/m/0g768	/music/record_label/artist	/m/01vz0g4
/m/0jnm_	/sports/sports_team/colors	/m/0jc_p
/m/0c7lcx	/film/actor/film./film/performance/film	/m/0gxtknx
/m/0m25p	/base/aareas/schema/administrative_area/administrative_parent	/m/0vmt
/m/0170vn	/award/award_nominee/award_nominations./award/award_nomination/award	/m/02x4w6g
/m/07xvf	/film/film/other_crew./film/film_crew_gig/film_crew_role	/m/09zzb8
/m/01q32bd	/award/award_nominee/award_nominations./award/award_nomination/award_nominee	/m/03f19q4
/m/015w9s	/media_common/netflix_genre/titles	/m/01f39b
/m/0b85mm	/film/film/release_date_s./film/film_regional_release_date/film_release_region	/m/03_3d
/m/0bt7w	/music/genre/artists	/m/09qr6
/m/01vwllw	/base/popstra/celebrity/canoodled./base/popstra/canoodled/participant	/m/01gbn6
/m/02x2gy0	/award/award_category/nominees./award/award_nomination/nominated_for	/m/0gltv
/m/01hkhq	/award/award_nominee/award_nominations./award/award_nomination/award_nominee	/m/01sp81
/m/0282x	/people/deceased_person/place_of_death	/m/0r62v
/m/03lvyj	/people/person/gender	/m/02zsn
/m/0m_31	/people/person/places_lived./people/place_lived/location	/m/05fkf
/m/015y3j	/education/educational_institution/school_type	/m/01rs41
/m/01309x	/award/award_nominee/award_nominations./award/award_nomination/award_nominee	/m/01l4zqz
/m/09v7wsg	/award/award_category/nominees./award/award_nomination/nominated_for	/m/039c26
/m/06j6l	/music/genre/artists	/m/01309x
/m/06jvj7	/award/award_nominee/award_nominations./award/award_nomination/award_nominee	/m/02pt6k_
/m/02bn_p	/government/legislative_session/members./government/government_position_held/legislative_sessions	/m/05l2z4
/m/046qq	/award/award_nominee/award_nominations./award/award_nomination/award	/m/099jhq
/m/06151l	/award/award_nominee/award_nominations./award/award_nomination/award_nominee	/m/01pgzn_
/m/0cct7p	/award/award_nominee/award_nominations./award/award_nomination/award	/m/03rbj2
/m/026mff	/award/award_category/winners./award/award_honor/award_winner	/m/0249kn
/m/040981l	/award/award_winner/awards_won./award/award_honor/award_winner	/m/026v437
/m/0948xk	/people/person/places_lived./people/place_lived/location	/m/02m77
/m/0c0nhgv	/award/award_winning_work/awards_won./award/award_honor/award_winner	/m/01d8yn
/m/036jv	/music/genre/artists	/m/01vvzb1
/m/01gkg3	/education/educational_degree/people_with_this_degree./education/education/major_field_of_study	/m/06mq7
/m/0738y5	/people/person/languages	/m/0999q
/m/0gxtknx	/film/film/release_date_s./film/film_regional_release_date/film_release_region	/m/05r4w
/m/09g0h	/people/person/profession	/m/09lbv
/m/07h565	/award/award_nominee/award_nominations./award/award_nomination/award_nominee	/m/06151l
/m/09fc83	/film/film/featured_film_locations	/m/068p2
/m/07k2mq	/film/film/release_date_s./film/film_regional_release_date/film_release_region	/m/06bnz
/m/026rm_y	/award/award_nominee/award_nominations./award/award_nomination/award	/m/02x73k6
/m/02h22	/film/film/release_date_s./film/film_regional_release_date/film_release_region	/m/05r4w
/m/0cjsxp	/award/award_winner/awards_won./award/award_honor/award_winner	/m/02tr7d
/m/03q0r1	/film/film/other_crew./film/film_crew_gig/film_crew_role	/m/033smt
/m/09w6br	/film/film/produced_by	/m/0415svh
/m/01hmk9	/people/person/profession	/m/018gz8
/m/07ykkx5	/film/film/other_crew./film/film_crew_gig/film_crew_role	/m/09zzb8
/m/0w0d	/olympics/olympic_sport/athletes./olympics/olympic_athlete_affiliation/country	/m/0163v
/m/08fbnx	/film/film/genre	/m/02kdv5l
/m/09b6zr	/government/politician/government_positions_held./government/government_position_held/basic_title	/m/0fkvn
/m/02t_y3	/people/person/profession	/m/02hrh1q
/m/0166b	/location/location/adjoin_s./location/adjoining_relationship/adjoins	/m/056vv
/m/01rnxn	/film/actor/film./film/performance/film	/m/0p_qr
/m/07y9k	/sports/sports_league/teams./sports/sports_league_participation/team	/m/01_lhg
/m/0ctt4z	/sports/sports_position/players./sports/sports_team_roster/team	/m/0jm7n
/m/02f4s3	/education/educational_institution/students_graduates./education/education/student	/m/04bdpf
/m/09bxq9	/award/award_nominee/award_nominations./award/award_nomination/nominated_for	/m/011yth
/m/016vn3	/award/award_nominee/award_nominations./award/award_nomination/award	/m/01c9jp
/m/0gdh5	/award/award_nominee/award_nominations./award/award_nomination/nominated_for	/m/0cbv4g
/m/0841zn	/soccer/football_player/current_team./sports/sports_team_roster/team	/m/01wx_y
/m/02624g	/award/award_nominee/award_nominations./award/award_nomination/award_nominee	/m/0356dp
/m/053xw6	/award/award_nominee/award_nominations./award/award_nomination/nominated_for	/m/09gkx35
/m/01wyz92	/base/popstra/celebrity/dated./base/popstra/dated/participant	/m/01vz0g4
/m/02fn5	/people/deceased_person/place_of_death	/m/07_fl
/m/01k70_	/award/award_winner/awards_won./award/award_honor/award_winner	/m/06jvj7
/m/01g03q	/tv/tv_program/regular_cast./tv/regular_tv_appearance/actor	/m/06gp3f
/m/0135g	/location/location/adjoin_s./location/adjoining_relationship/adjoins	/m/0dc95
/m/07g2v	/base/popstra/celebrity/friendship./base/popstra/friendship/participant	/m/0137n0
/m/0d_84	/film/actor/film./film/performance/film	/m/02kfzz
/m/0cqh6z	/award/award_category/winners./award/award_honor/award_winner	/m/01gq0b
/m/0f4yh	/film/film/film_art_direction_by	/m/05b2f_k
/m/09txzv	/film/film/produced_by	/m/01pw9v
/m/07c6l	/music/performance_role/regular_performances./music/group_membership/role	/m/0dwtp
/m/01gtc0	/government/legislative_session/members./government/government_position_held/district_represented	/m/03v1s
/m/0ddbjy4	/film/film/release_date_s./film/film_regional_release_date/film_release_region	/m/06bnz
/m/06q8hf	/award/award_nominee/award_nominations./award/award_nomination/award_nominee	/m/025jfl
/m/01fh0q	/music/artist/track_contributions./music/track_contribution/role	/m/01v8y9
/m/04zx3q1	/education/educational_degree/people_with_this_degree./education/education/institution	/m/01bm_
/m/0jqd3	/film/film/genre	/m/0bkbm
/m/044qx	/film/actor/film./film/performance/film	/m/0gxfz
/m/01795t	/award/award_nominee/award_nominations./award/award_nomination/nominated_for	/m/04g73n
/m/016clz	/music/genre/artists	/m/01gf5h
/m/02xb2bt	/award/award_nominee/award_nominations./award/award_nomination/award	/m/0fbvqf
/m/02rq8k8	/film/film/genre	/m/02kdv5l
/m/0cjsxp	/people/person/place_of_birth	/m/0d9y6
/m/05_wyz	/business/job_title/people_with_this_title./business/employment_tenure/company	/m/03y7ml
/m/0m2j5	/location/location/contains	/m/01m24m
/m/0c0k1	/people/person/places_lived./people/place_lived/location	/m/01_d4
/m/0275kr	/tv/tv_program/genre	/m/05jhg
/m/03tcbx	/government/legislative_session/members./government/government_position_held/district_represented	/m/07_f2
/m/050r1z	/film/film/produced_by	/m/03qncl3
/m/07bxhl	/organization/organization_member/member_of./organization/organization_membership/organization	/m/07t65
/m/01pkhw	/award/award_nominee/award_nominations./award/award_nomination/award_nominee	/m/01cj6y
/m/0cjsxp	/people/person/places_lived./people/place_lived/location	/m/0d9y6
/m/09cr8	/award/award_winning_work/awards_won./award/award_honor/award	/m/027dtxw
/m/01trtc	/music/record_label/artist	/m/04_jsg
/m/061xq	/baseball/baseball_team/team_stats./baseball/baseball_team_stats/season	/m/04110b0
/m/0cz8mkh	/film/film/release_date_s./film/film_regional_release_date/film_release_region	/m/03h64
/m/03kdl	/people/deceased_person/place_of_death	/m/02_286
/m/0fbw6	/food/food/nutrients./food/nutrition_fact/nutrient	/m/07hnp
/m/01gq0b	/award/award_nominee/award_nominations./award/award_nomination/award	/m/0cqh6z
/m/01mhwk	/award/award_ceremony/awards_presented./award/award_honor/award_winner	/m/01l7cxq
/m/099d4	/people/person/profession	/m/02jknp
/m/02_06s	/film/film/genre	/m/0219x_
/m/0333t	/film/film/genre	/m/02kdv5l
/m/02x1z2s	/award/award_category/winners./award/award_honor/award_winner	/m/024rgt
/m/023rwm	/music/record_label/artist	/m/013rfk
/m/0b_6_l	/base/marchmadness/ncaa_basketball_tournament/seeds./base/marchmadness/ncaa_tournament_seed/team	/m/03d5m8w
/m/03q58q	/music/record_label/artist	/m/0xsk8
/m/03bxp5	/film/film/costume_design_by	/m/03mfqm
/m/099c8n	/award/award_category/nominees./award/award_nomination/nominated_for	/m/0h95927
/m/027dtxw	/award/award_category/winners./award/award_honor/award_winner	/m/01ycbq
/m/038zh6	/sports/sports_team/sport	/m/09xp_
/m/09m6kg	/film/film/other_crew./film/film_crew_gig/film_crew_role	/m/09zzb8
/m/023s8	/film/actor/film./film/performance/film	/m/0fzm0g
/m/059fjj	/award/award_nominee/award_nominations./award/award_nomination/award_nominee	/m/044rvb
/m/09v7wsg	/award/award_category/nominees./award/award_nomination/nominated_for	/m/01dvry
/m/02tr7d	/award/award_winner/awards_won./award/award_honor/award_winner	/m/0cjsxp
/m/01f2w0	/tv/tv_network/programs./tv/tv_network_duration/program	/m/01cjhz
/m/0c0k1	/people/person/profession	/m/02hrh1q
/m/05bt6j	/music/genre/artists	/m/01dq9q
/m/0g5qmbz	/film/film/release_date_s./film/film_regional_release_date/film_release_region	/m/06bnz
/m/0161c	/organization/organization_member/member_of./organization/organization_membership/organization	/m/02vk52z
/m/02_286	/location/location/contains	/m/027kp3
/m/0glt670	/music/genre/artists	/m/01wzlxj
/m/02vxq9m	/film/film/release_date_s./film/film_regional_release_date/film_release_region	/m/0161c
/m/07ss8_	/award/award_nominee/award_nominations./award/award_nomination/award_nominee	/m/016kjs
/m/02x1z2s	/award/award_category/nominees./award/award_nomination/nominated_for	/m/09txzv
/m/016dgz	/people/person/profession	/m/02hrh1q
/m/04kkz8	/film/film/genre	/m/04gm78f
/m/01wsl7c	/people/person/gender	/m/02zsn
/m/027dtv3	/award/award_winner/awards_won./award/award_honor/award_winner	/m/040981l
/m/07k2mq	/film/film/release_date_s./film/film_regional_release_date/film_regional_debut_venue	/m/0prpt
/m/05ry0p	/people/person/gender	/m/02zsn
/m/0fgg8c	/american_football/football_team/current_roster./sports/sports_team_roster/position	/m/023wyl
/m/0fx0mw	/award/award_nominee/award_nominations./award/award_nomination/award_nominee	/m/02sb1w
/m/0279c15	/award/award_category/winners./award/award_honor/award_winner	/m/02m501
/m/04vs9	/organization/organization_member/member_of./organization/organization_membership/organization	/m/0gkjy
/m/04jb97	/award/award_nominee/award_nominations./award/award_nomination/award	/m/09v1lrz
/m/0dgq80b	/film/film/release_date_s./film/film_regional_release_date/film_release_region	/m/05r4w
/m/02yr1q	/education/educational_institution/students_graduates./education/education/major_field_of_study	/m/011s0
/m/0gq_d	/award/award_category/winners./award/award_honor/ceremony	/m/0bzkgg
/m/0180mw	/tv/tv_program/regular_cast./tv/regular_tv_appearance/actor	/m/02pjvc
/m/08720	/film/film/other_crew./film/film_crew_gig/crewmember	/m/027y151
/m/02ldv0	/award/award_nominee/award_nominations./award/award_nomination/award_nominee	/m/017149
/m/073y53	/award/award_category/winners./award/award_honor/award_winner	/m/07bty
/m/08jyyk	/music/genre/artists	/m/01vs4ff
/m/01vw87c	/film/actor/film./film/performance/film	/m/07xvf
/m/02cff1	/award/award_winner/awards_won./award/award_honor/award_winner	/m/050_qx
/m/02x1z2s	/award/award_category/nominees./award/award_nomination/nominated_for	/m/03q0r1
/m/0kjgl	/award/award_nominee/award_nominations./award/award_nomination/nominated_for	/m/09cr8
/m/02hsq3m	/award/award_category/nominees./award/award_nomination/nominated_for	/m/035_2h
/m/03ckfl9	/music/genre/artists	/m/014pg1
/m/02dlfh	/base/popstra/celebrity/canoodled./base/popstra/canoodled/participant	/m/017m2y
/m/01cj6y	/award/award_nominee/award_nominations./award/award_nomination/nominated_for	/m/064lsn
/m/01swck	/award/award_nominee/award_nominations./award/award_nomination/award	/m/02x4wr9
/m/01c9jp	/award/award_category/winners./award/award_honor/award_winner	/m/03f2_rc
/m/01m13b	/film/film/genre	/m/01lrrt
/m/01f08r	/location/statistical_region/places_exported_to./location/imports_and_exports/exported_to	/m/01z215
/m/02vxq9m	/award/award_winning_work/awards_won./award/award_honor/award	/m/02qvyrt
/m/03_0p	/award/award_winner/awards_won./award/award_honor/award_winner	/m/016k62
/m/02vkdwz	/sports/sports_position/players./sports/sports_team_roster/team	/m/04ls81
/m/01sp81	/award/award_winner/awards_won./award/award_honor/award_winner	/m/01hkhq
/m/01hkhq	/award/award_winner/awards_won./award/award_honor/award_winner	/m/016gr2
/m/09x3r	/olympics/olympic_games/sports	/m/0dwxr
/m/05_6_y	/sports/pro_athlete/teams./sports/sports_team_roster/team	/m/0272vm
/m/064lsn	/film/film/release_date_s./film/film_regional_release_date/film_release_region	/m/03_3d
/m/0gsg7	/tv/tv_network/programs./tv/tv_network_duration/program	/m/0275kr
/m/014zcr	/base/popstra/celebrity/friendship./base/popstra/friendship/participant	/m/0mm1q
/m/0466s8n	/film/film/other_crew./film/film_crew_gig/film_crew_role	/m/09zzb8
/m/04ljl_l	/award/award_category/winners./award/award_honor/award_winner	/m/016qtt
/m/01rnxn	/people/person/spouse_s./people/marriage/spouse	/m/01jrp0
/m/0421st	/award/award_nominee/award_nominations./award/award_nomination/nominated_for	/m/04fjzv
/m/051hrr	/music/performance_role/track_performances./music/track_contribution/role	/m/01vj9c
/m/02jjdr	/music/record_label/artist	/m/0pyg6
/m/023wyl	/sports/sports_position/players./sports/sports_team_roster/team	/m/03wnh
/m/07_f2	/location/statistical_region/religions./location/religion_percentage/religion	/m/072w0
/m/017m2y	/base/popstra/celebrity/breakup./base/popstra/breakup/participant	/m/02dlfh
/m/02t_v1	/people/person/religion	/m/02vxy_
/m/09b0xs	/award/award_winner/awards_won./award/award_honor/award_winner	/m/06jrhz
/m/09krp	/location/location/contains	/m/0bp_7
/m/05bnp0	/base/popstra/celebrity/friendship./base/popstra/friendship/participant	/m/0456xp
/m/051q5	/sports/sports_team/roster./american_football/football_historical_roster_position/position_s	/m/02g_6x
/m/0h6rm	/education/educational_institution/students_graduates./education/education/major_field_of_study	/m/05qjt
/m/06ns98	/award/award_nominee/award_nominations./award/award_nomination/award_nominee	/m/02xb2bt
/m/0blg2	/olympics/olympic_games/sports	/m/0486tv
/m/047csmy	/award/award_winning_work/awards_won./award/award_honor/award	/m/05f4m9q
/m/01mgw	/film/film/release_date_s./film/film_regional_release_date/film_release_region	/m/06f32
/m/02dr9j	/film/film/other_crew./film/film_crew_gig/film_crew_role	/m/09zzb8
/m/0bx0l	/award/award_winning_work/awards_won./award/award_honor/award_winner	/m/0h0jz
/m/08jyyk	/music/genre/artists	/m/048xh
/m/03wdsbz	/people/person/profession	/m/02pjxr
/m/033fqh	/film/film/production_companies	/m/01gb54
/m/02f73p	/award/award_category/winners./award/award_honor/award_winner	/m/01xzb6
/m/07g2v	/base/popstra/celebrity/friendship./base/popstra/friendship/participant	/m/015c4g
/m/03d1y3	/award/award_nominee/award_nominations./award/award_nomination/award	/m/05f4m9q
/m/0gr42	/award/award_category/nominees./award/award_nomination/nominated_for	/m/01f7jt
/m/06mt91	/base/popstra/celebrity/breakup./base/popstra/breakup/participant	/m/07ss8_
/m/0kjgl	/film/actor/film./film/performance/film	/m/09rvwmy
/m/07k53y	/american_football/football_team/current_roster./sports/sports_team_roster/position	/m/02g_6x
/m/039cq4	/award/award_winning_work/awards_won./award/award_honor/award_winner	/m/05gnf
/m/04jb97	/people/person/nationality	/m/03h64
/m/0180mw	/tv/tv_program/genre	/m/04gm78f
/m/057d89	/people/person/place_of_birth	/m/01_d4
/m/03dbww	/people/person/profession	/m/02hrh1q
/m/07nvmx	/soccer/football_player/current_team./sports/sports_team_roster/team	/m/01rly6
/m/03dq9	/award/award_nominee/award_nominations./award/award_nomination/award	/m/0262s1
/m/04_1l0v	/location/location/contains	/m/0vmt
/m/01q32bd	/award/award_nominee/award_nominations./award/award_nomination/award_nominee	/m/01wgxtl
/m/02896	/sports/sports_team/roster./american_football/football_roster_position/position	/m/02g_6x
/m/07z2lx	/award/award_category/nominees./award/award_nomination/nominated_for	/m/03ctqqf
/m/04h1rz	/government/legislative_session/members./government/government_position_held/legislative_sessions	/m/070mff
/m/0kvb6p	/award/award_winning_work/awards_won./award/award_honor/award_winner	/m/05v1sb
/m/0226cw	/government/politician/government_positions_held./government/government_position_held/legislative_sessions	/m/03tcbx
/m/01k70_	/award/award_nominee/award_nominations./award/award_nomination/nominated_for	/m/05gnf
/m/03nx8mj	/film/film/other_crew./film/film_crew_gig/film_crew_role	/m/09zzb8
/m/07jxpf	/film/film/genre	/m/017fp
/m/0241jw	/award/award_winner/awards_won./award/award_honor/award_winner	/m/03ym1
/m/01243b	/music/genre/artists	/m/03wjb7
/m/057lbk	/film/film/other_crew./film/film_crew_gig/film_crew_role	/m/033smt
/m/04411	/influence/influence_node/influenced_by	/m/01lwx
/m/0d331	/location/location/adjoin_s./location/adjoining_relationship/adjoins	/m/0156q
/m/01swck	/people/person/profession	/m/02hrh1q
/m/05_wyz	/business/job_title/people_with_this_title./business/employment_tenure/company	/m/01c7j1
/m/0165v	/organization/organization_member/member_of./organization/organization_membership/organization	/m/07t65
/m/0mfc0	/people/person/places_lived./people/place_lived/location	/m/0f2s6
/m/0blg2	/olympics/olympic_games/sports	/m/0dwxr
/m/02dr9j	/award/award_winning_work/awards_won./award/award_honor/award	/m/018wdw
/m/02mzg9	/education/educational_institution/colors	/m/01l849
/m/0bbf1f	/people/person/profession	/m/02hrh1q
/m/04vvh9	/film/film/language	/m/04306rv
/m/0j3d9tn	/film/film/release_date_s./film/film_regional_release_date/film_release_region	/m/01pj7
/m/01x4sb	/award/award_winner/awards_won./award/award_honor/award_winner	/m/0263tn1
/m/0gyfp9c	/film/film/release_date_s./film/film_regional_release_date/film_release_region	/m/03h64
/m/07k2mq	/film/film/release_date_s./film/film_regional_release_date/film_release_region	/m/03_3d
/m/07xzm	/music/performance_role/track_performances./music/track_contribution/role	/m/0dwvl
/m/03q64h	/people/person/nationality	/m/03_3d
/m/070m12	/award/award_winner/awards_won./award/award_honor/award_winner	/m/050023
/m/06j8wx	/award/award_nominee/award_nominations./award/award_nomination/award_nominee	/m/02tr7d
/m/0chw_	/people/person/profession	/m/02jknp
/m/031778	/award/award_winning_work/awards_won./award/award_honor/award_winner	/m/0134w7
/m/05_wyz	/business/job_title/people_with_this_title./business/employment_tenure/company	/m/0vlf
/m/02k54	/organization/organization_member/member_of./organization/organization_membership/organization	/m/0b6css
/m/02404v	/people/person/profession	/m/02hrh1q
/m/09yrh	/people/person/places_lived./people/place_lived/location	/m/02_286
/m/0418154	/award/award_ceremony/awards_presented./award/award_honor/honored_for	/m/02rzdcp
/m/026dx	/people/person/profession	/m/02jknp
/m/05tbn	/location/location/contains	/m/0mwh1
/m/02y49	/people/person/place_of_birth	/m/01_d4
/m/0z4s	/award/award_nominee/award_nominations./award/award_nomination/nominated_for	/m/035bcl
/m/05tbn	/location/location/contains	/m/068p2
/m/0fvzz	/base/biblioness/bibs_location/state	/m/05tbn
/m/01ck6h	/award/award_category/winners./award/award_honor/award_winner	/m/0137g1
/m/015wnl	/film/actor/film./film/performance/film	/m/04mcw4
/m/05bpg3	/award/award_nominee/award_nominations./award/award_nomination/award_nominee	/m/0mj1l
/m/02_p5w	/film/actor/film./film/performance/film	/m/023p7l
/m/01zt10	/people/person/places_lived./people/place_lived/location	/m/0dlv0
/m/0277c3	/people/person/profession	/m/0gbbt
/m/01clyr	/music/record_label/artist	/m/01l87db
/m/0gjcrrw	/film/film/executive_produced_by	/m/05hj_k
/m/061zc_	/film/actor/film./film/performance/film	/m/0f42nz
/m/01pq4w	/education/educational_institution/students_graduates./education/education/student	/m/010hn
/m/099c8n	/award/award_category/nominees./award/award_nomination/nominated_for	/m/01z452
/m/02_33l	/people/person/profession	/m/01c8w0
/m/0137g1	/award/award_nominee/award_nominations./award/award_nomination/award	/m/01ck6h
/m/0277c3	/people/person/gender	/m/02zsn
/m/07z6xs	/film/film/other_crew./film/film_crew_gig/film_crew_role	/m/09zzb8
/m/0n6f8	/film/actor/film./film/performance/film	/m/05jzt3
/m/03h64	/media_common/netflix_genre/titles	/m/01f8gz
/m/0jm3v	/sports/professional_sports_team/draft_picks./sports/sports_league_draft_pick/school	/m/0pspl
/m/02pt6k_	/award/award_nominee/award_nominations./award/award_nomination/award_nominee	/m/047q2wc
/m/015w8_	/tv/tv_program/regular_cast./tv/regular_tv_appearance/actor	/m/02gf_l
/m/0jz9f	/film/film_distributor/films_distributed./film/film_film_distributor_relationship/film	/m/011ypx
/m/0k0sb	/language/human_language/countries_spoken_in	/m/01pj7
/m/02qvzf	/sports/sports_position/players./sports/sports_team_roster/team	/m/032yps
/m/011k_j	/music/performance_role/track_performances./music/track_contribution/role	/m/0l1589
/m/02xwgr	/award/award_nominee/award_nominations./award/award_nomination/award_nominee	/m/014zcr
/m/09x3r	/olympics/olympic_games/participating_countries	/m/0165v
/m/0fbvqf	/award/award_category/nominees./award/award_nomination/nominated_for	/m/0ddd0gc
/m/01lct6	/people/person/places_lived./people/place_lived/location	/m/02_286
/m/02hsq3m	/award/award_category/nominees./award/award_nomination/nominated_for	/m/0ds2n
/m/06j6l	/music/genre/artists	/m/015x1f
/m/06ztvyx	/film/film/genre	/m/02kdv5l
/m/05gnf	/award/award_nominee/award_nominations./award/award_nomination/nominated_for	/m/0d68qy
/m/06l9n8	/people/person/places_lived./people/place_lived/location	/m/0ftxw
/m/087wc7n	/film/film/release_date_s./film/film_regional_release_date/film_release_region	/m/03_3d
/m/0478__m	/people/person/profession	/m/02hrh1q
/m/01clyr	/music/record_label/artist	/m/02qwg
/m/03ysmg	/award/award_nominee/award_nominations./award/award_nomination/award_nominee	/m/03ys2f
/m/09txzv	/film/film/genre	/m/0bj8m2
/m/050zr4	/award/award_winner/awards_won./award/award_honor/award_winner	/m/01_njt
/m/03mszl	/music/artist/track_contributions./music/track_contribution/role	/m/01vj9c
/m/0j871	/music/performance_role/regular_performances./music/group_membership/role	/m/01wy6
/m/02jsgf	/award/award_nominee/award_nominations./award/award_nomination/award_nominee	/m/017149
/m/01hkhq	/film/actor/film./film/performance/film	/m/03wjm2
/m/02822	/education/field_of_study/students_majoring./education/education/student	/m/03jjzf
/m/05cljf	/award/award_nominee/award_nominations./award/award_nomination/award	/m/01dpdh
/m/03bw6	/film/director/film	/m/0cq7kw
/m/0bmj2y	/organization/organization/headquarters./location/mailing_address/citytown	/m/02_286
/m/03tk6z	/award/award_category/winners./award/award_honor/ceremony	/m/01mhwk
/m/02l1fn	/education/educational_institution/school_type	/m/01rs41
/m/05kwx2	/award/award_nominee/award_nominations./award/award_nomination/award_nominee	/m/016gr2
/m/016yzz	/award/award_nominee/award_nominations./award/award_nomination/award	/m/0cqh46
/m/0170vn	/film/actor/film./film/performance/film	/m/06yykb
/m/01kb2j	/film/actor/film./film/performance/film	/m/09tqkv2
/m/0f721s	/award/award_winner/awards_won./award/award_honor/award_winner	/m/0gsg7
/m/01vwllw	/film/actor/film./film/performance/film	/m/03bxp5
/m/0z4s	/award/award_nominee/award_nominations./award/award_nomination/award	/m/027dtxw
/m/027dtxw	/award/award_category/nominees./award/award_nomination/nominated_for	/m/09q5w2
/m/073hd1	/award/award_ceremony/awards_presented./award/award_honor/award_winner	/m/01pj5q
/m/01pfr3	/award/award_nominee/award_nominations./award/award_nomination/award	/m/02wh75
/m/061zc_	/people/person/place_of_birth	/m/029kpy
/m/035s95	/film/film/other_crew./film/film_crew_gig/film_crew_role	/m/09zzb8
/m/0159h6	/film/actor/film./film/performance/film	/m/0462hhb
/m/0cxn2	/food/food/nutrients./food/nutrition_fact/nutrient	/m/025sqz8
/m/026w_gk	/award/award_nominee/award_nominations./award/award_nomination/award_nominee	/m/0p_2r
/m/02kz_	/influence/influence_node/influenced_by	/m/084w8
/m/06krf3	/film/film/genre	/m/017fp
/m/03chx58	/people/person/profession	/m/018gz8
/m/02z1nbg	/award/award_category/winners./award/award_honor/award_winner	/m/01kp66
/m/02pt6k_	/people/person/place_of_birth	/m/06wxw
/m/078mm1	/film/film/genre	/m/02kdv5l
/m/01fwpt	/people/person/gender	/m/02zsn
/m/05j0wc	/people/person/profession	/m/02hrh1q
/m/01bm_	/education/educational_institution/students_graduates./education/education/student	/m/04mz10g
/m/02xgdv	/people/person/profession	/m/02hrh1q
/m/016clz	/music/genre/artists	/m/011z3g
/m/0418154	/award/award_ceremony/awards_presented./award/award_honor/award_winner	/m/0bxtg
/m/0gr42	/award/award_category/nominees./award/award_nomination/nominated_for	/m/04mzf8
/m/0ftxw	/location/capital_of_administrative_division/capital_of./location/administrative_division_capital_relationship/administrative_division	/m/03v1s
/m/0dp7wt	/film/film/cinematography	/m/08t7nz
/m/016kjs	/people/person/places_lived./people/place_lived/location	/m/0f2tj
/m/017fp	/media_common/netflix_genre/titles	/m/026gyn_
/m/02hhtj	/base/popstra/celebrity/friendship./base/popstra/friendship/participant	/m/028r4y
/m/0xv2x	/music/genre/parent_genre	/m/016clz
/m/0292qb	/film/film/other_crew./film/film_crew_gig/film_crew_role	/m/033smt
/m/01w272y	/award/award_nominee/award_nominations./award/award_nomination/award_nominee	/m/012x4t
/m/01309x	/award/award_winner/awards_won./award/award_honor/award_winner	/m/02cx90
/m/0gj8nq2	/film/film/release_date_s./film/film_regional_release_date/film_release_region	/m/0jhd
/m/09yrh	/celebrities/celebrity/celebrity_friends./celebrities/friendship/friend	/m/0n6f8
/m/0dx8gj	/film/film/country	/m/03h64
/m/092c5f	/award/award_ceremony/awards_presented./award/award_honor/award_winner	/m/06gp3f
/m/036jv	/music/genre/parent_genre	/m/0glt670
/m/065b6q	/people/ethnicity/people	/m/01938t
/m/01c83m	/business/job_title/people_with_this_title./business/employment_tenure/company	/m/02wf01
/m/015t7v	/film/actor/film./film/performance/film	/m/02kfzz
/m/018h2	/media_common/netflix_genre/titles	/m/04h41v
/m/04t7ts	/film/actor/film./film/performance/film	/m/02mpyh
/m/057xs89	/award/award_category/nominees./award/award_nomination/nominated_for	/m/0n6ds
/m/02q7fl9	/film/film/country	/m/03_3d
/m/0dvqq	/award/award_nominee/award_nominations./award/award_nomination/award_nominee	/m/0478__m
/m/0glt670	/music/genre/artists	/m/01s1zk
/m/07y9k	/sports/sports_league/teams./sports/sports_league_participation/team	/m/037mp6
/m/01cwhp	/award/award_nominee/award_nominations./award/award_nomination/award_nominee	/m/03k0yw
/m/02c6pq	/film/actor/film./film/performance/film	/m/051ys82
/m/012x4t	/award/award_nominee/award_nominations./award/award_nomination/award_nominee	/m/09hnb
/m/0cbv4g	/award/award_winning_work/awards_won./award/award_honor/award	/m/02x2gy0
/m/06r2h	/film/film/written_by	/m/04511f
/m/043hg	/award/award_nominee/award_nominations./award/award_nomination/award	/m/02x4wr9
/m/03_3d	/location/location/contains	/m/0193fp
/m/06449	/award/award_nominee/award_nominations./award/award_nomination/award	/m/02qvyrt
/m/0263cyj	/sports/sports_team/colors	/m/06fvc
/m/068p2	/sports/sports_team_location/teams	/m/061xq
/m/01cj6y	/award/award_winner/awards_won./award/award_honor/award_winner	/m/03f4xvm
/m/02sb1w	/film/actor/film./film/performance/film	/m/0k4p0
/m/023gxx	/film/film/release_date_s./film/film_regional_release_date/film_release_region	/m/03h64
/m/05ldnp	/award/award_winner/awards_won./award/award_honor/award_winner	/m/05strv
/m/08t7nz	/award/award_nominee/award_nominations./award/award_nomination/nominated_for	/m/08720
/m/05f4m9q	/award/award_category/nominees./award/award_nomination/nominated_for	/m/0n08r
/m/0r111	/location/location/time_zones	/m/02lcqs
/m/0bytkq	/people/person/profession	/m/02pjxr
/m/0p_r5	/film/actor/film./film/performance/film	/m/09sr0
/m/03f4xvm	/award/award_winner/awards_won./award/award_honor/award_winner	/m/01cj6y
/m/06wzvr	/film/film/other_crew./film/film_crew_gig/film_crew_role	/m/018rn4
/m/0b85mm	/film/film/release_date_s./film/film_regional_release_date/film_release_region	/m/05r4w
/m/0fqyc	/location/location/contains	/m/0k3p
/m/02681xs	/award/award_category/winners./award/award_honor/ceremony	/m/08pc1x
/m/0f7hc	/award/award_nominee/award_nominations./award/award_nomination/nominated_for	/m/026f__m
/m/0vbk	/location/location/contains	/m/01rc6f
/m/02wwsh8	/award/award_category/winners./award/award_honor/award_winner	/m/0c31_
/m/04kkz8	/film/film/genre	/m/017fp
/m/0cjsxp	/award/award_nominee/award_nominations./award/award_nomination/award_nominee	/m/03w1v2
/m/03x16f	/award/award_nominee/award_nominations./award/award_nomination/award_nominee	/m/05dxl5
/m/03t22m	/music/performance_role/track_performances./music/track_contribution/role	/m/0dwvl
/m/0k9ctht	/award/award_nominee/award_nominations./award/award_nomination/nominated_for	/m/01lsl
/m/0bzknt	/award/award_ceremony/awards_presented./award/award_honor/award_winner	/m/0h1mt
/m/02kfzz	/award/award_nominated_work/award_nominations./award/award_nomination/nominated_for	/m/0dp7wt
/m/015t7v	/film/actor/film./film/performance/film	/m/0fzm0g
/m/027dtv3	/award/award_nominee/award_nominations./award/award_nomination/award_nominee	/m/02tr7d
/m/04ftdq	/education/educational_institution/school_type	/m/01rs41
/m/0cc7hmk	/film/film/release_date_s./film/film_regional_release_date/film_release_region	/m/06bnz
/m/03y82t6	/people/person/places_lived./people/place_lived/location	/m/0r62v
/m/0cc846d	/film/film/featured_film_locations	/m/02_286
/m/01_njt	/award/award_nominee/award_nominations./award/award_nomination/award	/m/0cqh6z
/m/02f73p	/award/award_category/winners./award/award_honor/award_winner	/m/0lbj1
/m/076xkdz	/film/film/dubbing_performances./film/dubbing_performance/actor	/m/05v954
/m/025ldg	/people/person/gender	/m/02zsn
/m/03vfr_	/film/film/genre	/m/01hwc6
/m/0f7hc	/award/award_nominee/award_nominations./award/award_nomination/award	/m/099jhq
/m/05nqz	/time/event/locations	/m/0163v
/m/0kq08	/location/location/contains	/m/0qy5v
/m/08pth9	/award/award_winner/awards_won./award/award_honor/award_winner	/m/0d810y
/m/09v42sf	/film/film/film_festivals	/m/0fpkxfd
/m/0r2bv	/location/location/time_zones	/m/02lcqs
/m/09qs08	/award/award_category/winners./award/award_honor/award_winner	/m/021b_
/m/01ck6v	/award/award_category/winners./award/award_honor/ceremony	/m/056878
/m/0hfjk	/media_common/netflix_genre/titles	/m/01zfzb
/m/0g768	/music/record_label/artist	/m/01vw20_
/m/017l96	/music/record_label/artist	/m/048xh
/m/0dy04	/education/educational_institution/students_graduates./education/education/major_field_of_study	/m/05qjt
/m/02xry	/location/statistical_region/religions./location/religion_percentage/religion	/m/04pk9
/m/0h95zbp	/film/film/release_date_s./film/film_regional_release_date/film_release_region	/m/0161c
/m/0c7ct	/people/person/gender	/m/02zsn
/m/03dq9	/people/person/profession	/m/02hrh1q
/m/05xvj	/baseball/baseball_team/team_stats./baseball/baseball_team_stats/season	/m/02h7s73
/m/0m32h	/people/cause_of_death/people	/m/08z39v
/m/03558l	/sports/sports_position/players./sports/sports_team_roster/team	/m/0jm2v
/m/0gg5kmg	/film/film/release_date_s./film/film_regional_release_date/film_release_region	/m/0j1z8
/m/027m67	/film/film/other_crew./film/film_crew_gig/film_crew_role	/m/09zzb8
/m/0f13b	/award/award_nominee/award_nominations./award/award_nomination/award	/m/0fbvqf
/m/027dtxw	/award/award_category/nominees./award/award_nomination/nominated_for	/m/04lhc4
/m/01x4sb	/people/person/gender	/m/02zsn
/m/01gq0b	/people/person/profession	/m/02hrh1q
/m/0gxtknx	/film/film/release_date_s./film/film_regional_release_date/film_release_region	/m/06f32
/m/0g1rw	/film/film_distributor/films_distributed./film/film_film_distributor_relationship/film	/m/0bbgvp
/m/0h1mt	/film/actor/film./film/performance/film	/m/03nqnnk
/m/016szr	/award/award_nominee/award_nominations./award/award_nomination/nominated_for	/m/0298n7
/m/024rgt	/film/film_distributor/films_distributed./film/film_film_distributor_relationship/film	/m/01k1k4
/m/09969	/people/cause_of_death/people	/m/04_by
/m/01vmv_	/education/educational_institution/students_graduates./education/education/student	/m/016z68
/m/0f1vrl	/people/person/place_of_birth	/m/013g3
/m/099c8n	/award/award_category/nominees./award/award_nomination/nominated_for	/m/0298n7
/m/039cq4	/tv/tv_program/regular_cast./tv/regular_tv_appearance/actor	/m/02dlfh
/m/0gy4k	/film/film/genre	/m/0bkbm
/m/0h95zbp	/film/film/release_date_s./film/film_regional_release_date/film_release_region	/m/0166b
/m/07h1q	/influence/influence_node/influenced_by	/m/04xm_
/m/0gyy0	/people/person/place_of_birth	/m/02_286
/m/0286gm1	/award/award_winning_work/awards_won./award/award_honor/award	/m/02z1nbg
/m/0gyfp9c	/film/film/release_date_s./film/film_regional_release_date/film_release_region	/m/05r4w
/m/036jp8	/people/person/religion	/m/051kv
/m/04954	/award/award_nominee/award_nominations./award/award_nomination/award_nominee	/m/0bxtg
/m/0pd4f	/film/film/language	/m/04306rv
/m/0f7hc	/influence/influence_node/influenced_by	/m/01hmk9
/m/01mh8zn	/award/award_nominee/award_nominations./award/award_nomination/nominated_for	/m/04kkz8
/m/02ln0f	/education/educational_institution/colors	/m/06fvc
/m/048rn	/film/film/featured_film_locations	/m/02_286
/m/070mff	/government/legislative_session/members./government/government_position_held/district_represented	/m/02xry
/m/02rq8k8	/film/film/language	/m/04306rv
/m/016qtt	/award/award_nominee/award_nominations./award/award_nomination/award	/m/01dpdh
/m/0fpv_3_	/film/film/release_date_s./film/film_regional_release_date/film_release_region	/m/05r4w
/m/09bymc	/award/award_ceremony/awards_presented./award/award_honor/award_winner	/m/025jfl
/m/0418154	/award/award_ceremony/awards_presented./award/award_honor/award_winner	/m/02m501
/m/05v1sb	/award/award_nominee/award_nominations./award/award_nomination/award_nominee	/m/0fqjks
/m/016clz	/music/genre/artists	/m/05k79
/m/034vds	/tv/tv_program/regular_cast./tv/regular_tv_appearance/actor	/m/0jrny
/m/01wc7p	/people/person/religion	/m/06nzl
/m/0f__1	/sports/sports_team_location/teams	/m/02plv57
/m/021yc7p	/award/award_nominee/award_nominations./award/award_nomination/nominated_for	/m/09sr0
/m/01gtdd	/government/legislative_session/members./government/government_position_held/district_represented	/m/07_f2
/m/02rzdcp	/award/award_winning_work/awards_won./award/award_honor/award_winner	/m/0bbvr84
/m/04dyqk	/people/person/profession	/m/02jknp
/m/04jb97	/people/person/profession	/m/02jknp
/m/03dbww	/award/award_nominee/award_nominations./award/award_nomination/award_nominee	/m/01mv_n
/m/017l96	/music/record_label/artist	/m/01x1cn2
/m/017l96	/music/record_label/artist	/m/0249kn
/m/065zr	/location/location/contains	/m/01yf40
/m/02qjv1p	/award/award_winning_work/awards_won./award/award_honor/award_winner	/m/021yc7p
/m/02prw4h	/film/film/produced_by	/m/02qjpv5
/m/01x4sb	/award/award_winner/awards_won./award/award_honor/award_winner	/m/0dgskx
/m/05dss7	/film/film/release_date_s./film/film_regional_release_date/film_release_region	/m/05r4w
/m/0g22z	/film/film/music	/m/0fp_v1x
/m/02x8m	/music/genre/artists	/m/046p9
/m/04bd8y	/film/actor/film./film/performance/film	/m/0ddcbd5
/m/042fk	/government/politician/government_positions_held./government/government_position_held/legislative_sessions	/m/01gtc0
/m/0ddkf	/award/award_winner/awards_won./award/award_honor/award_winner	/m/0jbyg
/m/019bnn	/award/award_category/winners./award/award_honor/award_winner	/m/016_mj
/m/01jq34	/education/educational_institution/students_graduates./education/education/major_field_of_study	/m/03ytc
/m/02cx90	/award/award_nominee/award_nominations./award/award_nomination/award	/m/026mml
/m/020hh3	/base/popstra/celebrity/friendship./base/popstra/friendship/participant	/m/0sz28
/m/02x4w6g	/award/award_category/nominees./award/award_nomination/nominated_for	/m/0209xj
/m/03fmfs	/organization/organization/headquarters./location/mailing_address/state_province_region	/m/05tbn
/m/04zx3q1	/education/educational_degree/people_with_this_degree./education/education/institution	/m/08qnnv
/m/09m6kg	/film/film/featured_film_locations	/m/027kp3
/m/0sb1r	/location/hud_county_place/county	/m/0nvd8
/m/0gj8t_b	/film/film/release_date_s./film/film_regional_release_date/film_release_region	/m/01pj7
/m/01jqr_5	/people/person/profession	/m/02hrh1q
/m/02wyzmv	/film/film/genre	/m/015w9s
/m/025cn2	/music/artist/origin	/m/02_286
/m/0fsw_7	/film/film/genre	/m/0bkbm
/m/02fqrf	/film/film/featured_film_locations	/m/01_d4
/m/01w03jv	/people/person/place_of_birth	/m/0ncj8
/m/0161c	/organization/organization_member/member_of./organization/organization_membership/organization	/m/07t65
/m/046m59	/award/award_winner/awards_won./award/award_honor/award_winner	/m/017149
/m/03f4xvm	/award/award_nominee/award_nominations./award/award_nomination/award_nominee	/m/01cj6y
/m/07xzm	/music/performance_role/track_performances./music/track_contribution/role	/m/0l14_3
/m/0gr42	/award/award_category/nominees./award/award_nomination/nominated_for	/m/0pd4f
[truncated: 5,406 more rows]
