# Supplementary material
Source: ML conference proceedings conference paper supplement (https://proceedings.neurips.cc/paper_files/paper/2021/hash/0fd600c953cde8121262e322ef09f70e-Abstract.html)
Supplement: Supplementary file 1 [file 0fd600c953cde8121262e322ef09f70e-Supplemental.zip › Supplementary_Material_Paper_8745/data/GraIL-BM_fb237_v3/test/test-random-sample/test8.txt]

/m/03hmt9b	/film/film/genre	/m/0219x_	1
/m/0jclr	/base/popstra/celebrity/canoodled./base/popstra/canoodled/participant	/m/0n6f8	0
/m/016h4r	/music/artist/origin	/m/0_z91	1
/m/0cvkv5	/film/film_set_designer/film_sets_designed	/m/02dbn2	0
/m/05bt6j	/music/genre/artists	/m/07c0j	1
/m/01jdxj	/base/popstra/celebrity/breakup./base/popstra/breakup/participant	/m/0cdf37	0
/m/01l1ls	/people/person/profession	/m/02hrh1q	1
/m/02fqxm	/olympics/olympic_sport/athletes./olympics/olympic_athlete_affiliation/olympics	/m/05l2z4	0
/m/043tvp3	/film/film/genre	/m/02kdv5l	1
/m/02d9k	/government/politician/government_positions_held./government/government_position_held/legislative_sessions	/m/07g2v	0
/m/04_1l0v	/location/location/contains	/m/03v0t	1
/m/09hz7t	/people/person/gender	/m/0c_md_	0
/m/01fwpt	/people/person/places_lived./people/place_lived/location	/m/02_286	1
/m/02zyq6	/education/university/domestic_tuition./measurement_unit/dated_money_value/currency	/m/03mr85	0
/m/02hsq3m	/award/award_category/nominees./award/award_nomination/nominated_for	/m/0639bg	1
/m/051_y	/olympics/olympic_participating_country/medals_won./olympics/olympic_medal_honor/olympics	/m/0bzlrh	0
/m/04nw9	/base/popstra/celebrity/canoodled./base/popstra/canoodled/participant	/m/012dtf	1
/m/04fkg4	/time/event/locations	/m/011_vz	0
/m/02qvyrt	/award/award_category/nominees./award/award_nomination/nominated_for	/m/02chhq	1
/m/01795t	/organization/organization/place_founded	/m/0257wh	0
/m/02l424	/education/educational_institution/students_graduates./education/education/major_field_of_study	/m/04rjg	1
/m/0262yt	/film/film/film_festivals	/m/02x4wr9	0
/m/027y151	/award/award_nominee/award_nominations./award/award_nomination/award_nominee	/m/021yc7p	1
/m/03qkcn9	/film/film_set_designer/film_sets_designed	/m/05b2f_k	0
/m/02y49	/people/person/profession	/m/02hrh1q	1
/m/01sqd7	/location/statistical_region/places_exported_to./location/imports_and_exports/exported_to	/m/030w19	0
/m/016tbr	/award/award_winner/awards_won./award/award_honor/award_winner	/m/09yrh	1
/m/06mq7	/influence/influence_node/influenced_by	/m/010rvx	0
/m/0821j	/award/award_nominee/award_nominations./award/award_nomination/award_nominee	/m/018fq	1
/m/051_y	/film/film/film_art_direction_by	/m/0979n	0
/m/05zlld0	/film/film/release_date_s./film/film_regional_release_date/film_release_region	/m/05r4w	1
/m/03xn3s2	/tv/tv_program/regular_cast./tv/regular_tv_appearance/actor	/m/05mv4	0
/m/085h1	/user/ktrueman/default_domain/international_organization/member_states	/m/01p1b	1
/m/0s987	/government/legislative_session/members./government/government_position_held/legislative_sessions	/m/09rvwmy	0
/m/0c9t0y	/film/film/music	/m/015wc0	1
/m/031t2d	/music/performance_role/regular_performances./music/group_membership/role	/m/0hgqq	0
/m/02k13d	/tv/non_character_role/tv_regular_personal_appearances./tv/tv_regular_personal_appearance/person	/m/054fvj	1
/m/034b6k	/olympics/olympic_sport/athletes./olympics/olympic_athlete_affiliation/country	/m/04jwly	0
/m/01g888	/music/genre/artists	/m/01tv3x2	1
/m/019n9w	/sports/pro_athlete/teams./sports/sports_team_roster/team	/m/019n9w	0
/m/058frd	/award/award_nominee/award_nominations./award/award_nomination/nominated_for	/m/01bn3l	1
/m/027rn	/baseball/baseball_team/team_stats./baseball/baseball_team_stats/season	/m/050kh5	0
/m/027c924	/award/award_category/winners./award/award_honor/award_winner	/m/02kxbx3	1
/m/03llf8	/tv/tv_network/programs./tv/tv_network_duration/program	/m/0f1pyf	0
/m/02yv6b	/music/genre/artists	/m/0jltp	1
/m/051_y	/medicine/disease/risk_factors	/m/03tk6z	0
/m/016clz	/music/genre/artists	/m/01wqflx	1
/m/02lk95	/sports/sports_team/roster./american_football/football_historical_roster_position/position_s	/m/02482c	0
/m/07t3x8	/people/person/profession	/m/02hrh1q	1
/m/0fgg8c	/education/educational_degree/people_with_this_degree./education/education/institution	/m/0gdh5	0
/m/011z3g	/award/award_nominee/award_nominations./award/award_nomination/award	/m/02f76h	1
/m/01zlx	/film/film_set_designer/film_sets_designed	/m/026mff	0
/m/06z68	/olympics/olympic_sport/athletes./olympics/olympic_athlete_affiliation/country	/m/02k54	1
/m/01vsy7t	/location/us_county/county_seat	/m/01wk7ql	0
/m/0bt7w	/music/genre/parent_genre	/m/01243b	1
/m/02cff1	/sports/sports_team/roster./american_football/football_historical_roster_position/position_s	/m/01pxcf	0
/m/01699	/organization/organization_member/member_of./organization/organization_membership/organization	/m/0gkjy	1
/m/02dbn2	/education/university/international_tuition./measurement_unit/dated_money_value/currency	/m/0jnh	0
/m/0652ty	/film/actor/film./film/performance/film	/m/0f4k49	1
/m/0mkqr	/location/location/adjoin_s./location/adjoining_relationship/adjoins	/m/0jrhl	0
/m/0gr42	/award/award_category/nominees./award/award_nomination/nominated_for	/m/0c3zjn7	1
/m/02m4d	/organization/organization/place_founded	/m/02_qt	0
/m/04zx3q1	/education/educational_degree/people_with_this_degree./education/education/institution	/m/01dyk8	1
/m/0h6rm	/people/ethnicity/languages_spoken	/m/03hnd	0
/m/019x62	/award/award_nominee/award_nominations./award/award_nomination/award_nominee	/m/01vsy7t	1
/m/0k_p5	/user/jg/default_domain/olympic_games/sports	/m/0222qb	0
/m/04n52p6	/film/film/other_crew./film/film_crew_gig/film_crew_role	/m/033smt	1
/m/0ycp3	/people/person/place_of_birth	/m/07lx1s	0
/m/01qkqwg	/award/award_winner/awards_won./award/award_honor/award_winner	/m/01309x	1
/m/0gpmp	/music/artist/contribution./music/recording_contribution/performance_role	/m/03cxsvl	0
/m/02tf1y	/influence/influence_node/influenced_by	/m/014zfs	1
/m/0133ch	/base/popstra/celebrity/dated./base/popstra/dated/participant	/m/05v954	0
/m/0k_kr	/music/record_label/artist	/m/09jm8	1
/m/02z6gky	/soccer/football_player/current_team./sports/sports_team_roster/team	/m/01l87db	0
/m/0jymd	/film/film/release_date_s./film/film_regional_release_date/film_release_region	/m/02_286	1
/m/02ln0f	/film/film/production_companies	/m/07jmnh	0
/m/0cb4j	/location/location/contains	/m/0h3lt	1
/m/0vm4s	/american_football/football_team/current_roster./sports/sports_team_roster/position	/m/03tk6z	0
/m/050023	/award/award_nominee/award_nominations./award/award_nomination/award_nominee	/m/025vldk	1
/m/0c3zjn7	/award/award_winner/awards_won./award/award_honor/award_winner	/m/0gtgp6	0
/m/0h1p	/award/award_nominee/award_nominations./award/award_nomination/nominated_for	/m/0dx8gj	1
/m/0lk8j	/people/ethnicity/geographic_distribution	/m/027mvrc	0
/m/0fvyg	/sports/sports_team_location/teams	/m/0263cyj	1
/m/05mrf_p	/film/film/production_companies	/m/0gdh5	0
/m/027dtxw	/award/award_category/nominees./award/award_nomination/nominated_for	/m/083shs	1
/m/037lyl	/music/group_member/membership./music/group_membership/group	/m/0333wf	0
/m/0438f	/education/educational_institution/colors	/m/01l849	1
/m/0j8f09z	/medicine/symptom/symptom_of	/m/01jrp0	0
/m/05tgks	/film/film/story_by	/m/0py5b	1
/m/05rrw9	/sports/sports_team/sport	/m/0267wwv	0
/m/01tnxc	/award/award_nominee/award_nominations./award/award_nomination/award_nominee	/m/07h565	1
/m/02qjv1p	/language/human_language/countries_spoken_in	/m/024rgt	0
/m/014x77	/people/person/spouse_s./people/marriage/location_of_ceremony	/m/02_286	1
/m/02mg7n	/location/country/form_of_government	/m/02w86hz	0
/m/01qqv5	/education/educational_institution/students_graduates./education/education/major_field_of_study	/m/04rjg	1
/m/0fbx6	/user/alexander/philosophy/philosopher/interests	/m/02184q	0
/m/0f8grf	/people/person/nationality	/m/03_3d	1
/m/02kz_	/tv/non_character_role/tv_regular_personal_appearances./tv/tv_regular_personal_appearance/person	/m/09v42sf	0
/m/01vj9c	/music/performance_role/regular_performances./music/group_membership/group	/m/0dvqq	1
/m/027ffq	/medicine/disease/risk_factors	/m/01w1sx	0
/m/07ncs0	/people/person/places_lived./people/place_lived/location	/m/02_286	1
/m/03rzvv	/film/film/story_by	/m/01zq91	0
/m/02q7fl9	/film/film/other_crew./film/film_crew_gig/film_crew_role	/m/09zzb8	1
/m/0mwyq	/organization/organization/headquarters./location/mailing_address/state_province_region	/m/0h1_w	0
/m/057xs89	/award/award_category/nominees./award/award_nomination/nominated_for	/m/01k1k4	1
/m/0ycp3	/base/marchmadness/ncaa_basketball_tournament/seeds./base/marchmadness/ncaa_tournament_seed/team	/m/06l9n8	0
/m/0bqthy	/base/marchmadness/ncaa_basketball_tournament/seeds./base/marchmadness/ncaa_tournament_seed/team	/m/0263cyj	1
/m/0gsy3b	/olympics/olympic_participating_country/medals_won./olympics/olympic_medal_honor/olympics	/m/016z2j	0
/m/034g2b	/award/award_winner/awards_won./award/award_honor/award_winner	/m/01nm3s	1
/m/0vm4s	/organization/organization_member/member_of./organization/organization_membership/organization	/m/01gtcc	0
/m/0284gcb	/award/award_winner/awards_won./award/award_honor/award_winner	/m/02778tk	1
/m/01d8yn	/education/educational_institution/school_type	/m/01wqpnm	0
/m/02yr3z	/education/educational_institution/colors	/m/01l849	1
/m/0h6rm	/influence/influence_node/influenced_by	/m/0152cw	0
/m/02hhtj	/base/popstra/celebrity/dated./base/popstra/dated/participant	/m/01pgzn_	1
/m/03c_8t	/award/award_category/winners./award/award_honor/ceremony	/m/0306ds	0
/m/09hnb	/award/award_nominee/award_nominations./award/award_nomination/award_nominee	/m/01vrt_c	1
/m/0kr7k	/sports/sports_team/roster./basketball/basketball_roster_position/position	/m/04rs03	0
/m/02j4sk	/people/person/places_lived./people/place_lived/location	/m/04ykg	1
/m/04n52p6	/film/film/story_by	/m/0f1pyf	0
/m/04ls81	/sports/sports_team/roster./american_football/football_historical_roster_position/position_s	/m/047g8h	1
/m/02g0rb	/award/award_ceremony/awards_presented./award/award_honor/award_winner	/m/0mwm6	0
/m/0d810y	/people/person/place_of_birth	/m/0f2tj	1
/m/030vnj	/award/award_nominee/award_nominations./award/award_nomination/award_nominee	/m/01d5vk	0
/m/01wyz92	/people/person/gender	/m/02zsn	1
/m/01g4bk	/sports/pro_athlete/teams./sports/sports_team_roster/team	/m/05nrkb	0
/m/017149	/award/award_nominee/award_nominations./award/award_nomination/award_nominee	/m/046m59	1
/m/0j1z8	/film/film/executive_produced_by	/m/07lx1s	0
/m/0fbtm7	/american_football/football_team/current_roster./sports/sports_team_roster/position	/m/02vkdwz	1
/m/03_x5t	/user/alexander/philosophy/philosopher/interests	/m/027ffq	0
/m/01wy6	/music/performance_role/regular_performances./music/group_membership/group	/m/01cblr	1
/m/0bkg4	/food/food/nutrients./food/nutrition_fact/nutrient	/m/09b0xs	0
/m/0b44shh	/film/film/release_date_s./film/film_regional_release_date/film_release_region	/m/03_3d	1
/m/03f3_p3	/location/hud_county_place/county	/m/064lsn	0
/m/04mcw4	/film/film/other_crew./film/film_crew_gig/film_crew_role	/m/09zzb8	1
/m/0fy34l	/soccer/football_player/current_team./sports/sports_team_roster/team	/m/0209xj	0
/m/07s6fsf	/education/educational_degree/people_with_this_degree./education/education/major_field_of_study	/m/011s0	1
/m/01dvbd	/people/person/profession	/m/02896	0
/m/0149xx	/people/person/profession	/m/01c8w0	1
/m/0263ycg	/people/ethnicity/languages_spoken	/m/016z2j	0
/m/024n3z	/people/person/profession	/m/02hrh1q	1
/m/05v954	/film/film/release_date_s./film/film_regional_release_date/film_release_region	/m/03mszl	0
/m/01ck6v	/award/award_category/winners./award/award_honor/award_winner	/m/03j24kf	1
/m/02py_sj	/people/person/languages	/m/07k2mq	0
/m/02m501	/award/award_nominee/award_nominations./award/award_nomination/award	/m/057xs89	1
/m/03bw6	/people/profession/specialization_of	/m/0hn2q	0
/m/06j6l	/music/genre/artists	/m/011z3g	1
/m/01fwk3	/education/university/local_tuition./measurement_unit/dated_money_value/currency	/m/0cpz4k	0
/m/01mylz	/people/person/profession	/m/02hrh1q	1
/m/06bss	/film/film/costume_design_by	/m/02vqsll	0
/m/0h1mt	/base/popstra/celebrity/canoodled./base/popstra/canoodled/participant	/m/01syr4	1
/m/0cvkv5	/baseball/baseball_team/team_stats./baseball/baseball_team_stats/season	/m/022h5x	0
/m/026w_gk	/award/award_nominee/award_nominations./award/award_nomination/award_nominee	/m/0284gcb	1
/m/017dbx	/music/performance_role/guest_performances./music/recording_contribution/performance_role	/m/0h1_w	0
/m/09cr8	/award/award_winning_work/awards_won./award/award_honor/award	/m/02x73k6	1
/m/03v0t	/sports/pro_athlete/teams./sports/sports_team_roster/team	/m/08pc1x	0
/m/05dptj	/award/award_winning_work/awards_won./award/award_honor/award_winner	/m/01kb2j	1
/m/0pmn7	/base/culturalevent/event/entity_involved	/m/033srr	0
/m/02jsgf	/award/award_nominee/award_nominations./award/award_nomination/award	/m/027b9k6	1
/m/06q8hf	/film/film/genre	/m/0gfmc_	0
/m/02d9k	/base/popstra/celebrity/friendship./base/popstra/friendship/participant	/m/01trhmt	1
/m/04f6hhm	/education/educational_institution/students_graduates./education/education/major_field_of_study	/m/021j38	0
/m/016z2j	/award/award_nominee/award_nominations./award/award_nomination/award_nominee	/m/03h2d4	1
/m/0mvxt	/dataworld/gardening_hint/split_to	/m/0h6rm	0
/m/01gbn6	/base/popstra/celebrity/dated./base/popstra/dated/participant	/m/0c3p7	1
/m/078jnn	/dataworld/gardening_hint/split_to	/m/01w272y	0
/m/06ch55	/music/instrument/instrumentalists	/m/03f4k	1
/m/017v_	/film/film/written_by	/m/02qysm0	0
/m/07s2s	/film/film_subject/films	/m/01f7jt	1
/m/02zfg3	/tv/tv_program/regular_cast./tv/regular_tv_appearance/actor	/m/09hz7t	0
/m/05_6_y	/soccer/football_player/current_team./sports/sports_team_roster/team	/m/0272vm	1
/m/048cl	/film/film/executive_produced_by	/m/0680m7	0
/m/03q0r1	/film/film/release_date_s./film/film_regional_release_date/film_release_region	/m/02k54	1
/m/0p4v_	/business/business_operation/industry	/m/02184q	0
/m/051q5	/sports/sports_team/roster./american_football/football_roster_position/position	/m/023wyl	1
/m/01s21dg	/location/location/partially_contains	/m/0n3g	0
/m/0blg2	/olympics/olympic_games/sports	/m/096f8	1
/m/0fqy4p	/influence/influence_node/peers./influence/peer_relationship/peers	/m/0r2bv	0
/m/01trtc	/music/record_label/artist	/m/0k6yt1	1
/m/02482c	/people/ethnicity/languages_spoken	/m/0x0w	0
/m/0f6_x	/people/person/profession	/m/02hrh1q	1
/m/019vv1	/film/film/genre	/m/016z2j	0
/m/02zyq6	/award/award_nominee/award_nominations./award/award_nomination/award	/m/02x73k6	1
/m/02psvcf	/travel/travel_destination/climate./travel/travel_destination_monthly_climate/month	/m/03bxp5	0
/m/03p41	/medicine/disease/notable_people_with_this_condition	/m/01vn0t_	1
/m/0k_l4	/location/country/capital	/m/03q64h	0
/m/019bnn	/award/award_category/winners./award/award_honor/award_winner	/m/012gq6	1
/m/0486tv	/award/ranked_item/appears_in_ranked_lists./award/ranking/list	/m/0229rs	0
/m/0j8f09z	/film/film/release_date_s./film/film_regional_release_date/film_release_region	/m/03_3d	1
/m/01l87db	/music/performance_role/guest_performances./music/recording_contribution/performance_role	/m/015wnl	0
/m/073tm9	/music/record_label/artist	/m/03f19q4	1
/m/03tk6z	/music/artist/origin	/m/01jdxj	0
/m/027dtxw	/award/award_category/winners./award/award_honor/award_winner	/m/015c4g	1
/m/050kh5	/organization/organization_member/member_of./organization/organization_membership/organization	/m/01fwk3	0
/m/0qy5v	/location/hud_county_place/county	/m/0kq08	1
/m/01rgn3	/people/deceased_person/place_of_burial	/m/09v1lrz	0
/m/02qvdc	/sports/sports_position/players./sports/sports_team_roster/team	/m/032yps	1
/m/01fwf1	/government/political_party/politicians_in_this_party./government/political_party_tenure/politician	/m/0x0w	0
/m/05r4w	/organization/organization_member/member_of./organization/organization_membership/organization	/m/0_2v	1
/m/02qkk9_	/base/schemastaging/organization_extra/phone_number./base/schemastaging/phone_sandbox/contact_category	/m/0jvt9	0
/m/02_jjm	/education/educational_institution/students_graduates./education/education/student	/m/05wh0sh	1
/m/037s5h	/location/us_county/county_seat	/m/01fh0q	0
/m/0g_bh	/music/genre/parent_genre	/m/08jyyk	1
/m/0btpm6	/location/us_county/county_seat	/m/0qyzb	0
/m/0421v9q	/film/film/release_date_s./film/film_regional_release_date/film_release_region	/m/0165v	1
/m/01chpn	/people/person/gender	/m/01pcz9	0
/m/059gkk	/award/award_nominee/award_nominations./award/award_nomination/award_nominee	/m/0c1ps1	1
/m/03v1s	/award/award_nominee/award_nominations./award/award_nomination/nominated_for	/m/0_7z2	0
/m/02rq8k8	/film/film/featured_film_locations	/m/0156q	1
/m/01lj_c	/education/educational_degree/people_with_this_degree./education/education/institution	/m/02l1fn	0
/m/03wbqc4	/film/film/featured_film_locations	/m/02_286	1
/m/0296y	/military/military_combatant/military_conflicts./military/military_combatant_group/combatants	/m/02qjv1p	0
/m/07z1_q	/people/person/gender	/m/02zsn	1
/m/0kr7k	/film/film/produced_by	/m/0156q	0
/m/0b57p6	/people/person/profession	/m/02hrh1q	1
/m/050r1z	/celebrities/celebrity/sexual_relationships./celebrities/romantic_relationship/celebrity	/m/0q9jk	0
/m/03q5t	/music/performance_role/regular_performances./music/group_membership/role	/m/0dwtp	1
/m/0bm2nq	/film/film/language	/m/04q01mn	0
/m/04954	/people/person/spouse_s./people/marriage/spouse	/m/059fjj	1
/m/01fvhp	/people/profession/specialization_of	/m/01wc7p	0
/m/015t7v	/award/award_winner/awards_won./award/award_honor/award_winner	/m/0241jw	1
/m/01l3mk3	/film/film/other_crew./film/film_crew_gig/film_crew_role	/m/01jdxj	0
/m/02hsq3m	/award/award_category/nominees./award/award_nomination/nominated_for	/m/0h21v2	1
/m/099c8n	/location/location/partially_contains	/m/033smt	0
/m/04tr1	/organization/organization_member/member_of./organization/organization_membership/organization	/m/02vk52z	1
/m/04vvh9	/award/award_category/disciplines_or_subjects	/m/0cct7p	0
/m/01f7jt	/award/award_winning_work/awards_won./award/award_honor/award	/m/02hsq3m	1
/m/0cm89v	/dataworld/gardening_hint/split_to	/m/03lpd0	0
/m/07h565	/award/award_nominee/award_nominations./award/award_nomination/award_nominee	/m/0kjgl	1
/m/0dp7wt	/base/biblioness/bibs_location/country	/m/01l7cxq	0
/m/0chw_	/people/person/gender	/m/02zsn	1
/m/02w670	/award/award_ceremony/awards_presented./award/award_honor/award_winner	/m/0222qb	0
/m/0bksh	/award/award_nominee/award_nominations./award/award_nomination/award_nominee	/m/0lx2l	1
/m/0d3f83	/award/award_winning_work/awards_won./award/award_honor/award_winner	/m/012jc	0
/m/0ksrf8	/people/person/gender	/m/02zsn	1
/m/0xn7q	/location/administrative_division/country	/m/01wkmgb	0
/m/01wy6	/music/performance_role/track_performances./music/track_contribution/role	/m/026g73	1
/m/01qygl	/base/culturalevent/event/entity_involved	/m/011yl_	0
/m/0421v9q	/award/award_winning_work/awards_won./award/award_honor/award_winner	/m/025mb_	1
/m/02fqxm	/military/military_conflict/combatants./military/military_combatant_group/combatants	/m/017lb_	0
/m/024rgt	/film/film_distributor/films_distributed./film/film_film_distributor_relationship/film	/m/0315w4	1
/m/01g4bk	/base/localfood/seasonal_month/produce_available./base/localfood/produce_availability/seasonal_months	/m/0_z91	0
/m/0vmt	/location/location/contains	/m/0m25p	1
/m/07yklv	/people/person/spouse_s./people/marriage/spouse	/m/0jhd	0
/m/051m56	/award/award_winner/awards_won./award/award_honor/award_winner	/m/02cx90	1
/m/019bnn	/education/educational_degree/people_with_this_degree./education/education/major_field_of_study	/m/02_286	0
/m/0q9jk	/tv/tv_program/regular_cast./tv/regular_tv_appearance/actor	/m/021b_	1
/m/0p4v_	/baseball/baseball_team/team_stats./baseball/baseball_team_stats/season	/m/02m7r	0
/m/05nrkb	/education/educational_institution/students_graduates./education/education/student	/m/021b_	1
/m/089z0z	/people/person/employment_history./business/employment_tenure/company	/m/0fbw6	0
/m/02rlj20	/film/film/genre	/m/0hfjk	1
/m/0133ch	/base/americancomedy/celebrity_impressionist/celebrities_impersonated	/m/0cymp	0
/m/01fmys	/film/film/release_date_s./film/film_regional_release_date/film_release_region	/m/01pj7	1
/m/05nrkb	/award/award_category/nominees./award/award_nomination/nominated_for	/m/02g0rb	0
/m/02qvyrt	/award/award_category/nominees./award/award_nomination/nominated_for	/m/0btpm6	1
/m/017kz7	/music/genre/parent_genre	/m/023nlj	0
/m/02fwfb	/film/film/genre	/m/0219x_	1
/m/0clzr	/award/award_category/winners./award/award_honor/ceremony	/m/0gyfp9c	0
/m/0c7lcx	/people/person/profession	/m/02hrh1q	1
/m/0l3h	/education/educational_degree/people_with_this_degree./education/education/student	/m/0486tv	0
/m/025cn2	/award/award_nominee/award_nominations./award/award_nomination/award_nominee	/m/037lyl	1
/m/027l4q	/film/film_distributor/films_distributed./film/film_film_distributor_relationship/film	/m/05mv4	0
/m/071tyz	/education/educational_degree/people_with_this_degree./education/education/institution	/m/07tk7	1
/m/0137n0	/base/aareas/schema/administrative_area/capital	/m/0739z6	0
/m/03f19q4	/award/award_nominee/award_nominations./award/award_nomination/award_nominee	/m/016kjs	1
/m/0161jj	/organization/organization/headquarters./location/mailing_address/citytown	/m/01gtcc	0
/m/01nrq5	/people/person/places_lived./people/place_lived/location	/m/010y34	1
/m/05nrkb	/music/genre/parent_genre	/m/0lwyk	0
/m/02wmbg	/people/person/languages	/m/09bnf	1
/m/018h2	/olympics/olympic_games/sports	/m/04n32	0
/m/0c9k8	/award/award_winning_work/awards_won./award/award_honor/award	/m/027dtxw	1
/m/09m6kg	/film/film/genre	/m/0bs5vty	0
/m/01nx_8	/people/person/places_lived./people/place_lived/location	/m/013n0n	1
/m/0dyl9	/people/person/places_lived./people/place_lived/location	/m/05fmy	0
/m/04kkz8	/film/film/other_crew./film/film_crew_gig/film_crew_role	/m/09zzb8	1
/m/0flj39	/location/capital_of_administrative_division/capital_of./location/administrative_division_capital_relationship/administrative_division	/m/0dlv0	0
/m/0f4yh	/award/award_winning_work/awards_won./award/award_honor/award	/m/018wdw	1
/m/04pk9	/base/aareas/schema/administrative_area/administrative_parent	/m/0cq7kw	0
/m/01kf3_9	/award/award_nominated_work/award_nominations./award/award_nomination/nominated_for	/m/0g5pvv	1
/m/0vlf	/music/performance_role/regular_performances./music/group_membership/group	/m/0jnwx	0
/m/09cr8	/award/award_winning_work/awards_won./award/award_honor/award_winner	/m/07h565	1
/m/04rs03	/people/person/places_lived./people/place_lived/location	/m/07sbbz2	0
/m/0g_bh	/music/genre/parent_genre	/m/0126t5	1
/m/0jhd	/government/politician/government_positions_held./government/government_position_held/legislative_sessions	/m/0bp_7	0
/m/0f4dx2	/people/person/profession	/m/02hrh1q	1
/m/089z0z	/business/job_title/people_with_this_title./business/employment_tenure/company	/m/01chpn	0
/m/0170_p	/film/film/music	/m/0fpjyd	1
/m/02482c	/people/person/nationality	/m/01vsy7t	0
/m/09bymc	/award/award_ceremony/awards_presented./award/award_honor/award_winner	/m/01vwllw	1
/m/018cqq	/base/aareas/schema/administrative_area/capital	/m/01wy6	0
/m/01hgwkr	/award/award_nominee/award_nominations./award/award_nomination/award	/m/02f73p	1
/m/029kpy	/film/film_set_designer/film_sets_designed	/m/0229rs	0
/m/0151b0	/music/performance_role/track_performances./music/track_contribution/role	/m/01vj9c	1
/m/0bzlrh	/government/politician/government_positions_held./government/government_position_held/legislative_sessions	/m/018cqq	0
/m/05r4w	/organization/organization_member/member_of./organization/organization_membership/organization	/m/0b6css	1
/m/02k856	/location/location/contains	/m/02q_ncg	0
/m/0k4p0	/film/film/featured_film_locations	/m/02_286	1
/m/03cp4cn	/food/food/nutrients./food/nutrition_fact/nutrient	/m/0gvbw	0
/m/099jhq	/award/award_category/nominees./award/award_nomination/nominated_for	/m/0h03fhx	1
/m/058vy5	/award/award_winning_work/awards_won./award/award_honor/award_winner	/m/02f8zw	0
/m/027dtv3	/award/award_nominee/award_nominations./award/award_nomination/award_nominee	/m/0cjsxp	1
/m/0x25q	/tv/tv_program/regular_cast./tv/regular_tv_appearance/actor	/m/0486tv	0
/m/016kjs	/base/popstra/celebrity/friendship./base/popstra/friendship/participant	/m/03f19q4	1
/m/0qy5v	/film/film/dubbing_performances./film/dubbing_performance/actor	/m/0jnwx	0
/m/09yrh	/award/award_nominee/award_nominations./award/award_nomination/award_nominee	/m/0lx2l	1
/m/08fbnx	/olympics/olympic_games/participating_countries	/m/0mwh1	0
/m/05cl2w	/film/actor/film./film/performance/film	/m/0170_p	1
/m/0m2j5	/award/ranked_item/appears_in_ranked_lists./award/ranking/list	/m/01s7pm	0
/m/06zgc	/olympics/olympic_sport/athletes./olympics/olympic_athlete_affiliation/olympics	/m/0124ld	1
/m/01tsbmv	/education/educational_institution/students_graduates./education/education/major_field_of_study	/m/05ry0p	0
/m/016clz	/music/genre/artists	/m/016lmg	1
/m/0979n	/location/administrative_division/country	/m/0jnm_	0
/m/047q2wc	/award/award_winner/awards_won./award/award_honor/award_winner	/m/06jvj7	1
/m/05njyy	/people/person/spouse_s./people/marriage/location_of_ceremony	/m/0pyg6	0
/m/026z9	/music/genre/artists	/m/01x1cn2	1
/m/06cgf	/government/political_party/politicians_in_this_party./government/political_party_tenure/politician	/m/0gdh5	0
/m/026g73	/music/performance_role/track_performances./music/track_contribution/role	/m/011k_j	1
/m/0qyzb	/tv/tv_network/programs./tv/tv_network_duration/program	/m/01jdxj	0
/m/0ddkf	/people/person/places_lived./people/place_lived/location	/m/02_286	1
/m/02j4sk	/government/government_office_category/officeholders./government/government_position_held/jurisdiction_of_office	/m/03c_8t	0
/m/01grp0	/government/legislative_session/members./government/government_position_held/district_represented	/m/05tbn	1
/m/0f1nl	/location/capital_of_administrative_division/capital_of./location/administrative_division_capital_relationship/administrative_division	/m/01zq91	0
/m/01w4dy	/music/performance_role/track_performances./music/track_contribution/role	/m/01wy6	1
/m/012x4t	/award/award_nominated_work/award_nominations./award/award_nomination/nominated_for	/m/0kt64b	0
/m/0qf2t	/film/film/genre	/m/0219x_	1
/m/026mff	/education/educational_degree/people_with_this_degree./education/education/institution	/m/01t_vv	0
/m/01w4dy	/music/performance_role/track_performances./music/track_contribution/role	/m/026g73	1
/m/061xq	/base/culturalevent/event/entity_involved	/m/01yhm	0
/m/034hwx	/film/film/genre	/m/02kdv5l	1
/m/0fg04	/base/popstra/celebrity/friendship./base/popstra/friendship/participant	/m/01flzb	0
/m/01mgw	/award/award_winning_work/awards_won./award/award_honor/award	/m/0262s1	1
/m/034hwx	/government/government_office_category/officeholders./government/government_position_held/jurisdiction_of_office	/m/061xq	0
/m/02wwsh8	/award/award_category/winners./award/award_honor/award_winner	/m/027vps	1
/m/01fwk3	/award/award_category/disciplines_or_subjects	/m/0462hhb	0
/m/07dzf	/organization/organization_member/member_of./organization/organization_membership/organization	/m/02vk52z	1
/m/01c9jp	/military/military_conflict/combatants./military/military_combatant_group/combatants	/m/013nky	0
/m/0k_kr	/music/record_label/artist	/m/01vn0t_	1
/m/01grp0	/base/biblioness/bibs_location/state	/m/025sf0_	0
/m/04ls81	/sports/sports_team/roster./american_football/football_roster_position/position	/m/02vkdwz	1
/m/02r0st6	/people/person/employment_history./business/employment_tenure/company	/m/02gr81	0
/m/0jrny	/people/person/place_of_birth	/m/02_286	1
/m/01rgn3	/film/film/prequel	/m/04f6hhm	0
/m/01vsy7t	/people/person/profession	/m/02hrh1q	1
/m/0294zg	/food/food/nutrients./food/nutrition_fact/nutrient	/m/0qdyf	0
/m/01kf3_9	/award/award_nominated_work/award_nominations./award/award_nomination/nominated_for	/m/0fsw_7	1
/m/0jhd	/language/human_language/countries_spoken_in	/m/05sbv3	0
/m/02fqrf	/film/film/release_date_s./film/film_regional_release_date/film_release_region	/m/03_3d	1
/m/02lg9w	/dataworld/gardening_hint/split_to	/m/01gssz	0
/m/0x3r3	/influence/influence_node/influenced_by	/m/01lwx	1
/m/04xm_	/olympics/olympic_games/sports	/m/0486tv	0
/m/05dxl5	/people/person/gender	/m/02zsn	1
/m/01t07j	/military/military_conflict/combatants./military/military_combatant_group/combatants	/m/0cnl80	0
/m/03tcbx	/government/legislative_session/members./government/government_position_held/legislative_sessions	/m/02bn_p	1
/m/0py9b	/people/person/spouse_s./people/marriage/location_of_ceremony	/m/0ddcbd5	0
/m/08jyyk	/music/genre/artists	/m/016ntp	1
/m/0_nh2	/film/film/other_crew./film/film_crew_gig/film_crew_role	/m/01_lhg	0
/m/04mcw4	/film/film/music	/m/0146pg	1
/m/019n9w	/user/ktrueman/default_domain/international_organization/member_states	/m/01c3q	0
/m/047g8h	/sports/sports_position/players./sports/sports_team_roster/team	/m/0fbtm7	1
/m/0n048	/film/film/prequel	/m/0_7z2	0
/m/06w99h3	/film/film/genre	/m/0hfjk	1
/m/06hhp	/award/award_ceremony/awards_presented./award/award_honor/honored_for	/m/08j7lh	0
/m/0c33pl	/people/person/gender	/m/02zsn	1
/m/0fbw6	/award/award_nominee/award_nominations./award/award_nomination/nominated_for	/m/07t65	0
/m/02r1c18	/film/film/release_date_s./film/film_regional_release_date/film_release_region	/m/05r4w	1
/m/01v8y9	/education/educational_institution/students_graduates./education/education/student	/m/09hz7t	0
/m/0cwfgz	/award/award_nominated_work/award_nominations./award/award_nomination/nominated_for	/m/06c0ns	1
/m/01vsy7t	/dataworld/gardening_hint/split_to	/m/019mdt	0
/m/0fztbq	/film/film/genre	/m/0bkbm	1
/m/0fqy4p	/education/university/local_tuition./measurement_unit/dated_money_value/currency	/m/096jwc	0
/m/04gcd1	/people/person/profession	/m/02jknp	1
/m/031t2d	/film/film/written_by	/m/013f9v	0
/m/016gr2	/award/award_nominee/award_nominations./award/award_nomination/award_nominee	/m/01sp81	1
/m/0ll3	/music/genre/artists	/m/0ll3	0
/m/0b_6x2	/time/event/locations	/m/0ftxw	1
/m/06q8hf	/government/legislative_session/members./government/government_position_held/district_represented	/m/058vy5	0
/m/08jyyk	/music/genre/artists	/m/06br6t	1
/m/0mkqr	/location/hud_county_place/county	/m/0lk8j	0
/m/0fpv_3_	/film/film/release_date_s./film/film_regional_release_date/film_release_region	/m/047lj	1
/m/03v0t	/music/performance_role/guest_performances./music/recording_contribution/performance_role	/m/03v0t	0
/m/03ys2f	/award/award_winner/awards_won./award/award_honor/award_winner	/m/03ysmg	1
/m/050kh5	/film/film/story_by	/m/0gwf191	0
/m/099jhq	/award/award_category/nominees./award/award_nomination/nominated_for	/m/07s846j	1
/m/04f6hhm	/tv/tv_program/regular_cast./tv/regular_tv_appearance/actor	/m/01_lhg	0
/m/0bxtg	/people/person/profession	/m/02jknp	1
/m/0n048	/tv/tv_network/programs./tv/tv_network_duration/program	/m/0lx2l	0
/m/08qnnv	/education/educational_institution/students_graduates./education/education/major_field_of_study	/m/040p_q	1
/m/06l9n8	/military/military_conflict/combatants./military/military_combatant_group/combatants	/m/09hz7t	0
/m/02bqmq	/government/legislative_session/members./government/government_position_held/legislative_sessions	/m/07p__7	1
/m/0jnm_	/sports/sports_team/sport	/m/0hn2q	0
/m/028r4y	/award/award_nominee/award_nominations./award/award_nomination/award_nominee	/m/01tnxc	1
/m/0c0yh4	/music/performance_role/guest_performances./music/recording_contribution/performance_role	/m/058z1hb	0
/m/042fk	/people/deceased_person/place_of_death	/m/0l4vc	1
/m/050023	/business/business_operation/industry	/m/02ptzz0	0
/m/024n3z	/award/award_nominee/award_nominations./award/award_nomination/award_nominee	/m/03ym1	1
/m/0cq8nx	/influence/influence_node/influenced_by	/m/0n4z2	0
/m/02xry	/location/statistical_region/religions./location/religion_percentage/religion	/m/02t7t	1
/m/0161jj	/education/educational_institution/school_type	/m/02_286	0
/m/023gxx	/film/film/release_date_s./film/film_regional_release_date/film_release_region	/m/03_3d	1
/m/0k7pf	/celebrities/celebrity/celebrity_friends./celebrities/friendship/friend	/m/039cq4	0
/m/03wnh	/american_football/football_team/current_roster./sports/sports_team_roster/position	/m/023wyl	1
/m/016tbr	/location/location/adjoin_s./location/adjoining_relationship/adjoins	/m/0nzny	0
/m/01wy6	/music/performance_role/track_performances./music/track_contribution/role	/m/01w4dy	1
/m/05nqz	/user/alexander/philosophy/philosopher/interests	/m/08mh3kd	0
/m/023zsh	/award/award_nominee/award_nominations./award/award_nomination/nominated_for	/m/057lbk	1
/m/0qtz9	/base/popstra/celebrity/canoodled./base/popstra/canoodled/participant	/m/02dbn2	0
/m/0hqly	/people/person/profession	/m/02jknp	1
/m/03f7m4h	/organization/endowed_organization/endowment./measurement_unit/dated_money_value/currency	/m/016kjs	0
/m/01pgzn_	/base/popstra/celebrity/canoodled./base/popstra/canoodled/participant	/m/05bnp0	1
/m/0l34j	/people/cause_of_death/people	/m/047csmy	0
/m/08720	/film/film/release_date_s./film/film_regional_release_date/film_release_region	/m/05r4w	1
/m/02g40r	/government/political_party/politicians_in_this_party./government/political_party_tenure/politician	/m/04q01mn	0
/m/06151l	/award/award_nominee/award_nominations./award/award_nomination/award_nominee	/m/0c4f4	1
/m/02l1fn	/education/educational_institution/school_type	/m/05zjd	0
/m/02qvyrt	/award/award_category/nominees./award/award_nomination/nominated_for	/m/028_yv	1
/m/01lxw6	/award/award_category/winners./award/award_honor/ceremony	/m/0h_9252	0
/m/01vw87c	/people/person/profession	/m/02hrh1q	1
/m/07k2mq	/people/profession/specialization_of	/m/04cx5	0
/m/0f0y8	/music/artist/track_contributions./music/track_contribution/role	/m/03t22m	1
/m/016bx2	/music/performance_role/track_performances./music/track_contribution/role	/m/0b_xm	0
/m/0_92w	/film/film/release_date_s./film/film_regional_release_date/film_release_region	/m/03h64	1
/m/018cqq	/tv/tv_producer/programs_produced./tv/tv_producer_term/program	/m/03wjb7	0
/m/018h2	/film/film_subject/films	/m/0d8w2n	1
/m/09v7wsg	/medicine/disease/notable_people_with_this_condition	/m/0k_p5	0
/m/05qjt	/education/field_of_study/students_majoring./education/education/major_field_of_study	/m/04rjg	1
/m/0bp_7	/location/location/time_zones	/m/0222qb	0
/m/0159h6	/people/person/profession	/m/02hrh1q	1
/m/08pc1x	/film/film/release_date_s./film/film_regional_release_date/film_regional_debut_venue	/m/0qmjd	0
/m/01g257	/award/award_nominee/award_nominations./award/award_nomination/award_nominee	/m/07d3z7	1
/m/01fsz	/film/film/featured_film_locations	/m/0mnyn	0
/m/01j851	/people/person/places_lived./people/place_lived/location	/m/013n0n	1
/m/03tk6z	/base/aareas/schema/administrative_area/capital	/m/07g2v	0
/m/03tk6z	/award/award_category/winners./award/award_honor/ceremony	/m/056878	1
/m/03q0r1	/military/military_conflict/combatants./military/military_combatant_group/combatants	/m/01lk02	0
/m/0djkrp	/film/film/genre	/m/01t_vv	1
/m/01pcz9	/film/film/production_companies	/m/0gfmc_	0
/m/0pd4f	/film/film/genre	/m/02kdv5l	1
/m/01wyz92	/people/person/spouse_s./people/marriage/location_of_ceremony	/m/018t8f	0
/m/03t95n	/film/film/genre	/m/02kdv5l	1
/m/0k_p5	/award/award_category/nominees./award/award_nomination/nominated_for	/m/0294zg	0
/m/0bxtg	/film/director/film	/m/0c00zd0	1
/m/064lsn	/award/award_nominee/award_nominations./award/award_nomination/award	/m/026f__m	0
/m/02qfhb	/people/person/profession	/m/02hrh1q	1
/m/019pwv	/film/film_set_designer/film_sets_designed	/m/05c74	0
/m/01mhwk	/award/award_ceremony/awards_presented./award/award_honor/award_winner	/m/0d193h	1
/m/02kz_	/government/legislative_session/members./government/government_position_held/district_represented	/m/08pth9	0
/m/016kjs	/award/award_nominee/award_nominations./award/award_nomination/award_nominee	/m/01q32bd	1
/m/061xq	/government/government_office_category/officeholders./government/government_position_held/jurisdiction_of_office	/m/09rvcvl	0
/m/06bnz	/organization/organization_member/member_of./organization/organization_membership/organization	/m/02vk52z	1
/m/02fqxm	/film/film/release_date_s./film/film_regional_release_date/film_release_region	/m/070mff	0
/m/0892sx	/music/artist/track_contributions./music/track_contribution/role	/m/01vj9c	1
/m/016kjs	/celebrities/celebrity/sexual_relationships./celebrities/romantic_relationship/celebrity	/m/0739z6	0
/m/01l4zqz	/award/award_winner/awards_won./award/award_honor/award_winner	/m/02cx90	1
/m/018t8f	/film/film/written_by	/m/03bw6	0
/m/0cbkc	/people/person/profession	/m/02hrh1q	1
/m/043tvp3	/people/person/religion	/m/04ns3gy	0
/m/0bqsy	/award/award_nominee/award_nominations./award/award_nomination/award	/m/01c427	1
/m/0134w7	/sports/sports_team/sport	/m/01mh8zn	0
/m/07vyf	/education/educational_institution/students_graduates./education/education/student	/m/0py5b	1
/m/02bwc7	/film/film/featured_film_locations	/m/0dlv0	0
/m/01dbk6	/people/person/profession	/m/02hrh1q	1
/m/01pxcf	/organization/organization/place_founded	/m/02rlj20	0
/m/05z43v	/film/film/genre	/m/017fp	1
/m/0pd6l	/film/film/country	/m/0py9b	0
/m/0cpz4k	/tv/tv_program/regular_cast./tv/regular_tv_appearance/actor	/m/02_wxh	1
/m/01c3q	/travel/travel_destination/climate./travel/travel_destination_monthly_climate/month	/m/0g9zjp	0
/m/025jfl	/award/award_nominee/award_nominations./award/award_nomination/nominated_for	/m/03hmt9b	1
/m/02h2z_	/film/film/edited_by	/m/017kz7	0
/m/04wmvz	/sports/professional_sports_team/draft_picks./sports/sports_league_draft_pick/school	/m/07w0v	1
/m/0ds6bmk	/education/university/domestic_tuition./measurement_unit/dated_money_value/currency	/m/05sbv3	0
/m/01xcr4	/tv/tv_personality/tv_regular_appearances./tv/tv_regular_personal_appearance/program	/m/0304nh	1
/m/05vtw	/base/americancomedy/celebrity_impressionist/celebrities_impersonated	/m/058vy5	0
/m/016clz	/music/genre/artists	/m/01cblr	1
/m/08720	/organization/organization/headquarters./location/mailing_address/state_province_region	/m/09m6kg	0
/m/0fzyg	/film/film_subject/films	/m/03n3gl	1
/m/0jnwx	/music/genre/parent_genre	/m/0n57k	0
/m/0gpmp	/people/person/profession	/m/0q04f	1
/m/03ytc	/military/military_combatant/military_conflicts./military/military_combatant_group/combatants	/m/013nky	0
/m/03swmf	/people/person/places_lived./people/place_lived/location	/m/02_286	1
/m/06zpgb2	/location/country/official_language	/m/033srr	0
/m/08vlns	/music/genre/artists	/m/01nkxvx	1
/m/051_y	/user/jg/default_domain/olympic_games/sports	/m/046lt	0
/m/01pctb	/film/actor/film./film/performance/film	/m/01shy7	1
/m/0jnh	/media_common/netflix_genre/titles	/m/0gpmp	0
/m/0xv2x	/music/genre/artists	/m/01w03jv	1
/m/01l3wr	/sports/sports_team/roster./basketball/basketball_roster_position/position	/m/0dp7wt	0
/m/02ptzz0	/sports/sports_team/roster./basketball/basketball_roster_position/position	/m/0ctt4z	1
/m/0gfmc_	/user/ktrueman/default_domain/international_organization/member_states	/m/0296y	0
/m/0z4s	/award/award_nominee/award_nominations./award/award_nomination/award_nominee	/m/02jsgf	1
/m/05njyy	/base/schemastaging/organization_extra/phone_number./base/schemastaging/phone_sandbox/service_language	/m/04zwc	0
/m/0971v	/food/food/nutrients./food/nutrition_fact/nutrient	/m/0h1tz	1
/m/0n048	/base/schemastaging/organization_extra/phone_number./base/schemastaging/phone_sandbox/service_language	/m/02g_6x	0
/m/0mwh1	/location/us_county/county_seat	/m/0_7z2	1
/m/017lb_	/education/university/international_tuition./measurement_unit/dated_money_value/currency	/m/04fkg4	0
/m/07xzm	/music/performance_role/regular_performances./music/group_membership/role	/m/01vj9c	1
/m/0bm2nq	/education/university/local_tuition./measurement_unit/dated_money_value/currency	/m/02qysm0	0
/m/0172rj	/music/genre/parent_genre	/m/0296y	1
/m/030nwm	/travel/travel_destination/climate./travel/travel_destination_monthly_climate/month	/m/0kjgl	0
/m/01s21dg	/people/person/places_lived./people/place_lived/location	/m/02_286	1
/m/09x3r	/film/film/featured_film_locations	/m/0c5x_	0
/m/06bss	/government/politician/government_positions_held./government/government_position_held/legislative_sessions	/m/02bqmq	1
/m/0hn2q	/education/field_of_study/students_majoring./education/education/student	/m/04vvh9	0
/m/01cj6y	/award/award_nominee/award_nominations./award/award_nomination/award_nominee	/m/01pkhw	1
/m/08pn_9	/olympics/olympic_sport/athletes./olympics/olympic_athlete_affiliation/olympics	/m/04fkg4	0
/m/027pdrh	/people/person/gender	/m/02zsn	1
/m/0178kd	/base/marchmadness/ncaa_basketball_tournament/seeds./base/marchmadness/ncaa_tournament_seed/team	/m/04gm78f	0
/m/01lct6	/government/politician/government_positions_held./government/government_position_held/legislative_sessions	/m/070mff	1
/m/02mg7n	/award/award_category/disciplines_or_subjects	/m/01gfhk	0
/m/05mrf_p	/film/film/featured_film_locations	/m/0156q	1
/m/05fyy5	/education/university/international_tuition./measurement_unit/dated_money_value/currency	/m/0gfmc_	0
/m/012gq6	/award/award_nominee/award_nominations./award/award_nomination/award	/m/019bnn	1
/m/0qy5v	/base/marchmadness/ncaa_basketball_tournament/seeds./base/marchmadness/ncaa_tournament_seed/team	/m/0209xj	0
/m/03j90	/people/person/places_lived./people/place_lived/location	/m/05r4w	1
/m/08pn_9	/film/film/other_crew./film/film_crew_gig/crewmember	/m/03hvk2	0
/m/025_64l	/american_football/football_team/current_roster./sports/sports_team_roster/position	/m/02vkdwz	1
/m/0b1t1	/base/x2010fifaworldcupsouthafrica/world_cup_squad/current_world_cup_squad./base/x2010fifaworldcupsouthafrica/current_world_cup_squad/current_club	/m/05gnf	0
/m/026b33f	/tv/tv_program/genre	/m/09lmb	1
/m/0b9l3x	/military/military_combatant/military_conflicts./military/military_combatant_group/combatants	/m/037lyl	0
/m/059gkk	/award/award_nominee/award_nominations./award/award_nomination/award_nominee	/m/0bl60p	1
/m/02py_sj	/people/person/spouse_s./people/marriage/spouse	/m/0892sx	0
/m/016yvw	/award/award_nominee/award_nominations./award/award_nomination/award	/m/057xs89	1
/m/02g0rb	/sports/sports_team/colors	/m/01wc7p	0
/m/01rnxn	/film/actor/film./film/performance/film	/m/01fwzk	1
/m/0lx2l	/award/award_winning_work/awards_won./award/award_honor/award_winner	/m/04yt7	0
/m/0c4f4	/people/person/gender	/m/02zsn	1
/m/0fbx6	/film/film/release_date_s./film/film_regional_release_date/film_release_region	/m/01mh8zn	0
/m/0lk8j	/olympics/olympic_games/sports	/m/096f8	1
/m/0flj39	/medicine/disease/notable_people_with_this_condition	/m/07b2lv	0
/m/03knl	/film/actor/film./film/performance/film	/m/01qb5d	1
/m/02fqrf	/travel/travel_destination/climate./travel/travel_destination_monthly_climate/month	/m/05q9g1	0
/m/02r22gf	/award/award_category/nominees./award/award_nomination/nominated_for	/m/09q5w2	1
/m/01sp81	/people/person/place_of_birth	/m/061xq	0
/m/0bv7t	/people/person/places_lived./people/place_lived/location	/m/071cn	1
/m/0g7nc	/film/film/cinematography	/m/01vmv_	0
/m/08720	/film/film/production_companies	/m/0g1rw	1
/m/0296y	/education/university/local_tuition./measurement_unit/dated_money_value/currency	/m/093dqjy	0
/m/01vrt_c	/award/award_winner/awards_won./award/award_honor/award_winner	/m/01wyz92	1
/m/03cf9ly	/location/location/contains	/m/0n6ds	0
/m/0821j	/award/award_nominee/award_nominations./award/award_nomination/award	/m/0262yt	1
/m/0137n0	/people/person/languages	/m/0cdf37	0
/m/09gkx35	/film/film/release_date_s./film/film_regional_release_date/film_release_region	/m/03_3d	1
/m/01vsy7t	/film/film/featured_film_locations	/m/0680m7	0
/m/09l9tq	/sports/pro_athlete/teams./sports/sports_team_roster/team	/m/01cwq9	1
/m/03tk6z	/organization/organization_founder/organizations_founded	/m/0qyzb	0
/m/065b6q	/people/ethnicity/people	/m/0137g1	1
/m/0k_p5	/people/cause_of_death/people	/m/0hgqq	0
/m/01f7v_	/award/award_nominee/award_nominations./award/award_nomination/nominated_for	/m/01f8gz	1
/m/0bp_7	/base/localfood/seasonal_month/produce_available./base/localfood/produce_availability/seasonal_months	/m/09b6zr	0
/m/044qx	/award/award_nominee/award_nominations./award/award_nomination/nominated_for	/m/0gxfz	1
/m/01vsy95	/base/localfood/seasonal_month/produce_available./base/localfood/produce_availability/seasonal_months	/m/0124ld	0
/m/02pw_n	/film/film/executive_produced_by	/m/0d_skg	1
/m/03s0w	/music/instrument/family	/m/040p_q	0
/m/0c4f4	/base/popstra/celebrity/dated./base/popstra/dated/participant	/m/033tln	1
/m/03wkwg	/base/marchmadness/ncaa_basketball_tournament/seeds./base/marchmadness/ncaa_tournament_seed/team	/m/02rwmk	0
/m/057xs89	/award/award_category/nominees./award/award_nomination/nominated_for	/m/02vxq9m	1
/m/05xjb	/sports/sports_team/roster./basketball/basketball_roster_position/position	/m/03mszl	0
/m/02w7gg	/people/ethnicity/people	/m/01sp81	1
/m/02s2ys	/people/person/employment_history./business/employment_tenure/company	/m/01vh096	0
/m/0bxtg	/award/award_nominee/award_nominations./award/award_nomination/award	/m/0279c15	1
/m/05zlld0	/location/location/partially_contains	/m/0bksh	0
/m/018wdw	/award/award_category/nominees./award/award_nomination/nominated_for	/m/02dr9j	1
/m/034b6k	/organization/organization/place_founded	/m/0q9jk	0
/m/05kfs	/people/person/place_of_birth	/m/02_286	1
/m/01flzb	/baseball/baseball_team/team_stats./baseball/baseball_team_stats/season	/m/02m7r	0
/m/01kb2j	/award/award_nominee/award_nominations./award/award_nomination/award_nominee	/m/04t7ts	1
/m/02k13d	/film/film/release_date_s./film/film_regional_release_date/film_release_region	/m/0ydpd	0
/m/04954	/award/award_winner/awards_won./award/award_honor/award_winner	/m/017149	1
/m/064lsn	/base/popstra/celebrity/dated./base/popstra/dated/participant	/m/0gwf191	0
/m/01nm3s	/award/award_winner/awards_won./award/award_honor/award_winner	/m/034g2b	1
/m/01wgx4	/base/marchmadness/ncaa_basketball_tournament/seeds./base/marchmadness/ncaa_tournament_seed/team	/m/01g4bk	0
/m/0gjcrrw	/film/film/release_date_s./film/film_regional_release_date/film_release_region	/m/03_3d	1
/m/0156q	/government/legislative_session/members./government/government_position_held/legislative_sessions	/m/0156q	0
/m/02778tk	/tv/tv_writer/tv_programs./tv/tv_program_writer_relationship/tv_program	/m/0d68qy	1
/m/030w19	/award/award_ceremony/awards_presented./award/award_honor/award_winner	/m/01nczg	0
/m/071jrc	/people/deceased_person/place_of_death	/m/0k_p5	1
/m/05mrf_p	/language/human_language/countries_spoken_in	/m/0zdkh	0
/m/05tbn	/location/statistical_region/religions./location/religion_percentage/religion	/m/051kv	1
/m/050r1z	/education/university/local_tuition./measurement_unit/dated_money_value/currency	/m/0333wf	0
/m/02zrv7	/film/actor/film./film/performance/film	/m/01shy7	1
/m/0n6f8	/organization/organization_founder/organizations_founded	/m/0486tv	0
/m/0fbvqf	/award/award_category/nominees./award/award_nomination/nominated_for	/m/015ppk	1
/m/01v8y9	/people/person/spouse_s./people/marriage/spouse	/m/02zfg3	0
/m/0jnb0	/influence/influence_node/peers./influence/peer_relationship/peers	/m/01c58j	1
/m/02jsgf	/award/award_nominee/award_nominations./award/award_nomination/award_nominee	/m/01l3wr	0
/m/01l79yc	/award/award_nominee/award_nominations./award/award_nomination/nominated_for	/m/083shs	1
/m/0l14v3	/organization/organization/headquarters./location/mailing_address/state_province_region	/m/01tsbmv	0
/m/0l1589	/music/performance_role/track_performances./music/track_contribution/role	/m/01vj9c	1
/m/08fbnx	/organization/role/leaders./organization/leadership/organization	/m/085h1	0
/m/02d9k	/base/popstra/celebrity/friendship./base/popstra/friendship/participant	/m/014zcr	1
/m/03pm9	/base/aareas/schema/administrative_area/administrative_parent	/m/05j0wc	0
/m/0971v	/food/food/nutrients./food/nutrition_fact/nutrient	/m/025s0zp	1
/m/070mff	/award/award_nominated_work/award_nominations./award/award_nomination/nominated_for	/m/02p68d	0
/m/01309x	/award/award_winner/awards_won./award/award_honor/award_winner	/m/01qkqwg	1
/m/03mr85	/people/person/place_of_birth	/m/0fgg8c	0
/m/01fmys	/film/film/release_date_s./film/film_regional_release_date/film_release_region	/m/06bnz	1
/m/0486tv	/award/award_winning_work/awards_won./award/award_honor/award_winner	/m/050023	0
/m/04ls81	/sports/sports_team/roster./american_football/football_roster_position/position	/m/02g_6x	1
/m/01bm_	/film/film/film_art_direction_by	/m/0z4s	0
/m/02qvyrt	/award/award_category/nominees./award/award_nomination/nominated_for	/m/05jzt3	1
/m/05sbv3	/film/film_set_designer/film_sets_designed	/m/0bmj2y	0
/m/02778tk	/award/award_winner/awards_won./award/award_honor/award_winner	/m/0p_2r	1
/m/08pn_9	/base/marchmadness/ncaa_basketball_tournament/seeds./base/marchmadness/ncaa_tournament_seed/team	/m/07sbbz2	0
/m/02dr9j	/award/award_winning_work/awards_won./award/award_honor/award	/m/027b9k6	1
/m/09hz7t	/sports/sports_team/roster./baseball/baseball_roster_position/position	/m/012x4t	0
/m/0mm1q	/award/award_nominee/award_nominations./award/award_nomination/award	/m/05f4m9q	1
/m/0gvbw	/music/genre/artists	/m/0f1nl	0
/m/0j6b5	/film/film/release_date_s./film/film_regional_release_date/film_release_region	/m/0161c	1
/m/0gfmc_	/time/event/locations	/m/01j5ts	0
/m/0btpm6	/award/award_winning_work/awards_won./award/award_honor/award	/m/027dtxw	1
/m/04gm78f	/sports/sports_league_draft/picks./sports/sports_league_draft_pick/school	/m/0qmjd	0
/m/0cqh6z	/award/award_category/nominees./award/award_nomination/nominated_for	/m/0180mw	1
/m/0306ds	/organization/organization/headquarters./location/mailing_address/state_province_region	/m/016k62	0
/m/01hkhq	/award/award_winner/awards_won./award/award_honor/award_winner	/m/01sp81	1
/m/02q_ncg	/tv/tv_network/programs./tv/tv_network_duration/program	/m/02q_ncg	0
/m/024rgt	/film/film_distributor/films_distributed./film/film_film_distributor_relationship/film	/m/04qw17	1
/m/05vtw	/organization/organization/child./organization/organization_relationship/child	/m/05ry0p	0
/m/0j1z8	/organization/organization_member/member_of./organization/organization_membership/organization	/m/02vk52z	1
/m/0bm2nq	/film/film/film_festivals	/m/06q8hf	0
/m/07w21	/people/person/gender	/m/02zsn	1
/m/0bzk8w	/location/location/time_zones	/m/0294zg	0
/m/03s7h	/base/schemastaging/organization_extra/phone_number./base/schemastaging/phone_sandbox/service_location	/m/03_3d	1
/m/0148nj	/film/film/edited_by	/m/0cq7kw	0
/m/01gssz	/government/legislative_session/members./government/government_position_held/district_represented	/m/05tbn	1
/m/01l87db	/base/popstra/celebrity/friendship./base/popstra/friendship/participant	/m/02zsn	0
/m/063y_ky	/award/award_category/nominees./award/award_nomination/nominated_for	/m/0j8f09z	1
/m/01sqd7	/base/americancomedy/celebrity_impressionist/celebrities_impersonated	/m/03llf8	0
/m/01795t	/film/film_distributor/films_distributed./film/film_film_distributor_relationship/film	/m/0jnwx	1
/m/0m32h	/base/schemastaging/organization_extra/phone_number./base/schemastaging/phone_sandbox/service_location	/m/0k_p5	0
/m/0jnm_	/sports/sports_team/colors	/m/06fvc	1
/m/09b6zr	/sports/sports_team_location/teams	/m/01j5ts	0
/m/01vyv9	/award/award_nominee/award_nominations./award/award_nomination/award_nominee	/m/034zc0	1
/m/07g2v	/award/award_winning_work/awards_won./award/award_honor/award	/m/024rgt	0
/m/03_lf	/influence/influence_node/influenced_by	/m/048cl	1
/m/0fbw6	/film/film/cinematography	/m/090gpr	0
/m/056878	/award/award_ceremony/awards_presented./award/award_honor/award_winner	/m/01s21dg	1
/m/03lgg	/people/person/places_lived./people/place_lived/location	/m/0892sx	0
/m/07s6fsf	/education/educational_degree/people_with_this_degree./education/education/institution	/m/0c5x_	1
/m/08j7lh	/award/award_nominee/award_nominations./award/award_nomination/award	/m/0mn6	0
/m/041p3y	/music/record_label/artist	/m/0m_31	1
/m/067jsf	/base/schemastaging/organization_extra/phone_number./base/schemastaging/phone_sandbox/contact_category	/m/01mgw	0
/m/047g8h	/sports/sports_position/players./sports/sports_team_roster/team	/m/043vc	1
/m/04rs03	/music/performance_role/track_performances./music/track_contribution/role	/m/01423b	0
/m/08815	/education/educational_institution/students_graduates./education/education/major_field_of_study	/m/04rjg	1
/m/0gvbw	/media_common/netflix_genre/titles	/m/01tsbmv	0
/m/01fwk3	/film/actor/film./film/performance/film	/m/0k4p0	1
/m/02f4s3	/award/award_nominee/award_nominations./award/award_nomination/nominated_for	/m/016kjs	0
/m/06mnbn	/people/person/gender	/m/02zsn	1
/m/01gbb4	/location/us_county/county_seat	/m/01t07j	0
/m/01yhm	/baseball/baseball_team/team_stats./baseball/baseball_team_stats/season	/m/04110b0	1
/m/05fkf	/education/field_of_study/students_majoring./education/education/student	/m/05fkf	0
/m/05dxl5	/award/award_nominee/award_nominations./award/award_nomination/award_nominee	/m/03x16f	1
/m/02zfg3	/olympics/olympic_games/sports	/m/05sbv3	0
/m/010hn	/people/person/places_lived./people/place_lived/location	/m/01ktz1	1
/m/03s0w	/tv/tv_producer/programs_produced./tv/tv_producer_term/program	/m/0cq8nx	0
/m/017149	/award/award_winner/awards_won./award/award_honor/award_winner	/m/04954	1
/m/02k856	/music/group_member/membership./music/group_membership/group	/m/057d89	0
/m/04mzf8	/film/film/film_art_direction_by	/m/05v1sb	1
/m/03558l	/base/saturdaynightlive/snl_cast_member/seasons./base/saturdaynightlive/snl_season_tenure/cast_members	/m/06bss	0
/m/04954	/award/award_nominee/award_nominations./award/award_nomination/award_nominee	/m/01pkhw	1
/m/02w670	/film/film/production_companies	/m/016bx2	0
/m/01rr9f	/award/award_winner/awards_won./award/award_honor/award_winner	/m/09yrh	1
/m/01flzb	/film/film/genre	/m/0gsy3b	0
/m/01xzb6	/award/award_nominee/award_nominations./award/award_nomination/award	/m/01ck6h	1
/m/01vsy7t	/location/capital_of_administrative_division/capital_of./location/administrative_division_capital_relationship/administrative_division	/m/04d817	0
/m/017v_	/base/aareas/schema/administrative_area/capital	/m/02h6_6p	1
/m/047vp1n	/award/award_winner/awards_won./award/award_honor/award_winner	/m/05sbv3	0
/m/0m24v	/location/location/adjoin_s./location/adjoining_relationship/adjoins	/m/0m25p	1
/m/05f4m9q	/award/award_winning_work/awards_won./award/award_honor/honored_for	/m/01zlx	0
/m/07c6l	/music/performance_role/regular_performances./music/group_membership/role	/m/01vj9c	1
/m/0bzk8w	/base/aareas/schema/administrative_area/administrative_parent	/m/0qdyf	0
/m/07gxw	/music/genre/artists	/m/02k5sc	1
/m/01lj_c	/organization/endowed_organization/endowment./measurement_unit/dated_money_value/currency	/m/01lj_c	0
/m/08ff1k	/award/award_nominee/award_nominations./award/award_nomination/nominated_for	/m/0gy4k	1
/m/01mgw	/base/schemastaging/organization_extra/phone_number./base/schemastaging/phone_sandbox/service_location	/m/0296y	0
/m/0bzlrh	/award/award_ceremony/awards_presented./award/award_honor/award_winner	/m/019x62	1
/m/0k0sb	/location/location/partially_contains	/m/017149	0
/m/02kfzz	/film/film/cinematography	/m/05br10	1
/m/0gwf191	/language/human_language/countries_spoken_in	/m/0pmn7	0
/m/09rvwmy	/film/film/other_crew./film/film_crew_gig/film_crew_role	/m/09zzb8	1
/m/01wg3q	/people/person/languages	/m/05mc7y	0
/m/0sxg4	/film/film/story_by	/m/053ksp	1
/m/01cjhz	/olympics/olympic_games/participating_countries	/m/01whvs	0
/m/02_340	/people/person/profession	/m/02jknp	1
/m/0ydpd	/location/administrative_division/country	/m/0n6f8	0
/m/02r9p0c	/film/film/country	/m/03_3d	1
/m/01l3mk3	/olympics/olympic_sport/athletes./olympics/olympic_athlete_affiliation/country	/m/0ytc	0
/m/0pyg6	/award/award_nominee/award_nominations./award/award_nomination/award	/m/01c427	1
/m/0zdkh	/military/military_conflict/combatants./military/military_combatant_group/combatants	/m/0bm2nq	0
/m/07c0j	/award/award_winner/awards_won./award/award_honor/award_winner	/m/01vsy7t	1
/m/04x4vj	/music/instrument/family	/m/02_wxh	0
/m/0h0jz	/people/person/profession	/m/02hrh1q	1
/m/03fmfs	/medicine/disease/notable_people_with_this_condition	/m/030vnj	0
/m/05zlld0	/film/film/production_companies	/m/01gb54	1
/m/0ck1d	/education/university/domestic_tuition./measurement_unit/dated_money_value/currency	/m/013nky	0
/m/05k2xy	/film/film/other_crew./film/film_crew_gig/film_crew_role	/m/09zzb8	1
/m/01pkhw	/olympics/olympic_games/sports	/m/02zsn	0
/m/01ypc	/sports/sports_team/colors	/m/06fvc	1
/m/06br8	/celebrities/celebrity/celebrity_friends./celebrities/friendship/friend	/m/02zyq6	0
/m/01pcz9	/award/award_nominee/award_nominations./award/award_nomination/award_nominee	/m/016z2j	1
/m/0879xc	/film/film/executive_produced_by	/m/04t7ts	0
/m/0gsg7	/tv/tv_network/programs./tv/tv_network_duration/program	/m/0304nh	1
/m/037lyl	/base/aareas/schema/administrative_area/administrative_parent	/m/01qqv5	0
/m/018qb4	/user/jg/default_domain/olympic_games/sports	/m/06wrt	1
/m/0267wwv	/sports/sports_team/colors	/m/01zlx	0
/m/01lct6	/people/person/profession	/m/02hrh1q	1
/m/09dfcj	/music/performance_role/guest_performances./music/recording_contribution/performance_role	/m/0k0sb	0
/m/01ycbq	/award/award_nominee/award_nominations./award/award_nomination/award_nominee	/m/08jfkw	1
/m/0133ch	/film/film_set_designer/film_sets_designed	/m/0b9l3x	0
/m/05f0r8	/people/person/profession	/m/02hrh1q	1
/m/03sxd2	/film/film_set_designer/film_sets_designed	/m/0cvkv5	0
/m/0d1swh	/soccer/football_player/current_team./sports/sports_team_roster/team	/m/06cmd2	1
/m/0fgg8c	/people/deceased_person/place_of_burial	/m/034hwx	0
/m/0fx0mw	/award/award_winner/awards_won./award/award_honor/award_winner	/m/03w1v2	1
/m/02p68d	/people/ethnicity/languages_spoken	/m/08pn_9	0
/m/03cp4cn	/film/film/cinematography	/m/06r_by	1
/m/01wy6	/award/award_category/winners./award/award_honor/award_winner	/m/01l87db	0
/m/02x4wr9	/award/award_category/nominees./award/award_nomination/nominated_for	/m/01mgw	1
/m/0bzlrh	/film/film/film_production_design_by	/m/03s0w	0
/m/04h6mm	/people/person/place_of_birth	/m/0c_m3	1
/m/0d9fz	/film/film/release_date_s./film/film_regional_release_date/film_release_region	/m/05v954	0
/m/0969vz	/award/award_nominee/award_nominations./award/award_nomination/award	/m/03rbj2	1
/m/0mnyn	/location/country/capital	/m/0gwf191	0
/m/015wnl	/film/actor/film./film/performance/film	/m/076tw54	1
/m/01grp0	/base/saturdaynightlive/snl_cast_member/seasons./base/saturdaynightlive/snl_season_tenure/cast_members	/m/0ll3	0
/m/0crc2cp	/film/film/release_date_s./film/film_regional_release_date/film_release_region	/m/06bnz	1
/m/01d8yn	/music/performance_role/guest_performances./music/recording_contribution/performance_role	/m/05nqz	0
/m/01kf3_9	/award/award_nominated_work/award_nominations./award/award_nomination/nominated_for	/m/0fztbq	1
/m/067jsf	/people/ethnicity/geographic_distribution	/m/0n3g	0
/m/0q1lp	/people/person/profession	/m/02jknp	1
/m/0148nj	/award/award_winning_work/awards_won./award/award_honor/award_winner	/m/037lyl	0
/m/0g768	/music/record_label/artist	/m/027kwc	1
/m/02kz_	/people/person/profession	/m/01jrp0	0
/m/01dbk6	/award/award_nominee/award_nominations./award/award_nomination/award_nominee	/m/05ry0p	1
/m/02phtzk	/film/film/written_by	/m/027l4q	0
/m/02_qt	/film/film/genre	/m/02kdv5l	1
/m/016tbr	/education/educational_degree/people_with_this_degree./education/education/institution	/m/0mndw	0
/m/042fk	/government/politician/government_positions_held./government/government_position_held/legislative_sessions	/m/01gtdd	1
/m/05v954	/people/person/spouse_s./people/marriage/location_of_ceremony	/m/01vsy7t	0
/m/0192hw	/film/film/genre	/m/082gq	1
/m/0ddcbd5	/user/ktrueman/default_domain/international_organization/member_states	/m/03xn3s2	0
/m/033fqh	/film/film/music	/m/016szr	1
/m/070w7s	/olympics/olympic_games/participating_countries	/m/021j38	0
/m/026w_gk	/award/award_winner/awards_won./award/award_honor/award_winner	/m/0284gcb	1
/m/01fh0q	/american_football/football_team/current_roster./sports/sports_team_roster/position	/m/01l3wr	0
/m/0639bg	/film/film/language	/m/04306rv	1
/m/03mr85	/music/group_member/membership./music/group_membership/role	/m/0cq7kw	0
/m/017kz7	/film/film/genre	/m/01j1n2	1
/m/028r4y	/award/award_nominee/award_nominations./award/award_nomination/award	/m/0fy34l	0
/m/0b_734	/base/marchmadness/ncaa_basketball_tournament/seeds./base/marchmadness/ncaa_tournament_seed/team	/m/0263cyj	1
/m/04zn7g	/location/us_county/county_seat	/m/0fbx6	0
/m/01dvtx	/influence/influence_node/influenced_by	/m/04xm_	1
/m/02py_sj	/people/profession/specialization_of	/m/0yyn5	0
/m/04954	/award/award_winner/awards_won./award/award_honor/award_winner	/m/05hj0n	1
/m/0cymp	/education/university/local_tuition./measurement_unit/dated_money_value/currency	/m/05v954	0
/m/06mt91	/award/award_nominee/award_nominations./award/award_nomination/award_nominee	/m/02k5sc	1
/m/0kvqv	/film/actor/film./film/performance/film	/m/01s1zk	0
/m/01_d4	/travel/travel_destination/climate./travel/travel_destination_monthly_climate/month	/m/0ll3	1
/m/01d5vk	/tv/tv_personality/tv_regular_appearances./tv/tv_regular_personal_appearance/program	/m/07k2mq	0
/m/026w_gk	/tv/tv_producer/programs_produced./tv/tv_producer_term/program	/m/0d68qy	1
/m/039x1k	/music/instrument/instrumentalists	/m/03cf9ly	0
/m/07ymr5	/tv/tv_personality/tv_regular_appearances./tv/tv_regular_personal_appearance/program	/m/039cq4	1
/m/0167q3	/organization/organization/headquarters./location/mailing_address/state_province_region	/m/0h2zvzr	0
/m/015wnl	/film/actor/film./film/performance/film	/m/035s95	1
/m/02g40r	/film/film/edited_by	/m/0l3h	0
/m/0k8y7	/base/popstra/celebrity/dated./base/popstra/dated/participant	/m/02fn5	1
/m/05nrkb	/film/film/film_festivals	/m/05njyy	0
/m/0156q	/location/statistical_region/religions./location/religion_percentage/religion	/m/05sfs	1
/m/0dp7wt	/film/film/dubbing_performances./film/dubbing_performance/actor	/m/0486tv	0
/m/08cn_n	/people/person/place_of_birth	/m/0167q3	1
/m/02k13d	/music/group_member/membership./music/group_membership/role	/m/0_7z2	0
/m/01z215	/location/location/adjoin_s./location/adjoining_relationship/adjoins	/m/0161c	1
/m/0296y	/location/country/form_of_government	/m/0_lr1	0
/m/02wrrm	/people/person/places_lived./people/place_lived/location	/m/02_286	1
/m/025cn2	/olympics/olympic_games/participating_countries	/m/03ytc	0
/m/0dfjb8	/people/person/profession	/m/02jknp	1
/m/03d9wk	/award/award_winning_work/awards_won./award/award_honor/honored_for	/m/0167q3	0
/m/01g888	/music/genre/artists	/m/014pg1	1
/m/092c5f	/organization/organization/headquarters./location/mailing_address/citytown	/m/0257wh	0
/m/01771z	/award/award_nominated_work/award_nominations./award/award_nomination/nominated_for	/m/0cwfgz	1
/m/01htzx	/location/location/partially_contains	/m/0264jc6	0
/m/01cky2	/award/award_category/winners./award/award_honor/award_winner	/m/012x4t	1
/m/03tk6z	/people/person/languages	/m/0m2j5	0
/m/024n3z	/award/award_winner/awards_won./award/award_honor/award_winner	/m/015t7v	1
/m/09b6zr	/language/human_language/countries_spoken_in	/m/0h_9252	0
/m/0fc9js	/award/award_category/winners./award/award_honor/award_winner	/m/030tjk	1
/m/0jtdp	/sports/sports_team/roster./american_football/football_roster_position/position	/m/0bczgm	0
/m/02896	/sports/sports_team/roster./american_football/football_roster_position/position	/m/047g8h	1
/m/03f7m4h	/education/educational_degree/people_with_this_degree./education/education/student	/m/02cff1	0
/m/02z1nbg	/award/award_category/nominees./award/award_nomination/nominated_for	/m/0462hhb	1
/m/01l87db	/sports/sports_team/roster./american_football/football_historical_roster_position/position_s	/m/01pkhw	0
/m/0284gcb	/tv/tv_writer/tv_programs./tv/tv_program_writer_relationship/tv_program	/m/02hct1	1
/m/0fbx6	/base/localfood/seasonal_month/produce_available./base/localfood/produce_availability/seasonal_months	/m/02m4d	0
/m/01vz0g4	/celebrities/celebrity/sexual_relationships./celebrities/romantic_relationship/celebrity	/m/01wyz92	1
/m/05fh2	/film/film/production_companies	/m/0gh6j94	0
/m/01mv_n	/award/award_winner/awards_won./award/award_honor/award_winner	/m/03dbww	1
/m/017dbx	/music/performance_role/regular_performances./music/group_membership/group	/m/09l9xt	0
/m/0d68qy	/award/award_winning_work/awards_won./award/award_honor/award_winner	/m/0284gcb	1
/m/0jnwx	/location/us_county/county_seat	/m/0fg04	0
/m/05f4m9q	/award/award_category/nominees./award/award_nomination/nominated_for	/m/02rq8k8	1
/m/0fnb4	/music/genre/parent_genre	/m/05218gr	0
/m/03_3d	/organization/organization_member/member_of./organization/organization_membership/organization	/m/07t65	1
/m/03mr85	/music/group_member/membership./music/group_membership/role	/m/078jnn	0
/m/026v437	/award/award_nominee/award_nominations./award/award_nomination/award_nominee	/m/040981l	1
/m/011_vz	/film/film/executive_produced_by	/m/0m2j5	0
/m/0fpv_3_	/film/film/release_date_s./film/film_regional_release_date/film_release_region	/m/06bnz	1
/m/07z6xs	/people/person/spouse_s./people/marriage/spouse	/m/02x8m	0
/m/0879xc	/sports/pro_athlete/teams./sports/sports_team_roster/team	/m/0mmd6	1
/m/0hpz8	/base/aareas/schema/administrative_area/capital	/m/05t2fh4	0
/m/0g1rw	/film/film_distributor/films_distributed./film/film_film_distributor_relationship/film	/m/02fwfb	1
/m/04r7p	/education/educational_degree/people_with_this_degree./education/education/major_field_of_study	/m/01gfhk	0
/m/0152cw	/people/person/gender	/m/02zsn	1
/m/053ksp	/tv/tv_program/genre	/m/01psyx	0
/m/0263tn1	/award/award_nominee/award_nominations./award/award_nomination/award_nominee	/m/0dgskx	1
/m/01r216	/organization/organization_member/member_of./organization/organization_membership/organization	/m/0ck1d	0
/m/085h1	/user/ktrueman/default_domain/international_organization/member_states	/m/0164b	1
/m/01dpsv	/location/us_county/county_seat	/m/01423b	0
/m/050r1z	/film/film/music	/m/01kd57	1
/m/01lxw6	/base/localfood/seasonal_month/produce_available./base/localfood/produce_availability/seasonal_months	/m/0h_9252	0
/m/0l3h	/organization/organization_member/member_of./organization/organization_membership/organization	/m/07t65	1
/m/06cgf	/celebrities/celebrity/celebrity_friends./celebrities/friendship/friend	/m/09v1lrz	0
/m/056878	/award/award_ceremony/awards_presented./award/award_honor/award_winner	/m/02lk95	1
/m/0279c15	/government/politician/government_positions_held./government/government_position_held/basic_title	/m/05fh2	0
/m/02qvyrt	/award/award_category/nominees./award/award_nomination/nominated_for	/m/0m63c	1
/m/04jwly	/film/film/film_art_direction_by	/m/0hh2s	0
/m/020y73	/film/film/genre	/m/082gq	1
/m/0_7z2	/location/country/form_of_government	/m/0dd6bf	0
/m/02qny_	/sports/pro_athlete/teams./sports/sports_team_roster/team	/m/01k2xy	1
/m/024hbv	/base/culturalevent/event/entity_involved	/m/08pth9	0
/m/0drs7	/location/location/adjoin_s./location/adjoining_relationship/adjoins	/m/0drs_	1
/m/06pwf6	/film/film/film_production_design_by	/m/01wy6	0
/m/02yv6b	/music/genre/artists	/m/01s21dg	1
/m/03xn3s2	/tv/non_character_role/tv_regular_personal_appearances./tv/tv_regular_personal_appearance/person	/m/02zfg3	0
/m/0jqp3	/film/film/written_by	/m/0170vn	1
/m/04ykg	/location/hud_county_place/county	/m/09dfcj	0
/m/0fqjks	/award/award_winner/awards_won./award/award_honor/award_winner	/m/05v1sb	1
/m/02q_ncg	/base/aareas/schema/administrative_area/capital	/m/0jm7n	0
/m/02r0csl	/award/award_category/nominees./award/award_nomination/nominated_for	/m/0sxg4	1
/m/01v8y9	/celebrities/celebrity/celebrity_friends./celebrities/friendship/friend	/m/0bp_7	0
/m/04d_mtq	/celebrities/celebrity/celebrity_friends./celebrities/friendship/friend	/m/0dxmyh	1
/m/0229rs	/base/aareas/schema/administrative_area/capital	/m/012_53	0
/m/01vvlyt	/people/person/places_lived./people/place_lived/location	/m/0lhn5	1
/m/09qftb	/award/award_nominee/award_nominations./award/award_nomination/nominated_for	/m/03f7m4h	0
/m/06j8wx	/award/award_winner/awards_won./award/award_honor/award_winner	/m/01hkhq	1
/m/0_lr1	/music/performance_role/track_performances./music/track_contribution/role	/m/058z1hb	0
/m/0bp_7	/location/capital_of_administrative_division/capital_of./location/administrative_division_capital_relationship/administrative_division	/m/09krp	1
/m/02rzdcp	/people/person/sibling_s./people/sibling_relationship/sibling	/m/0gvstc3	0
/m/0jm4b	/sports/professional_sports_team/draft_picks./sports/sports_league_draft_pick/draft	/m/06439y	1
/m/02zfg3	/medicine/disease/risk_factors	/m/01vsy95	0
/m/01w8n89	/people/person/profession	/m/0gbbt	1
/m/016kjs	/film/film/personal_appearances./film/personal_film_appearance/person	/m/01938t	0
/m/07dzf	/organization/organization_member/member_of./organization/organization_membership/organization	/m/07t65	1
/m/02tk74	/military/military_conflict/combatants./military/military_combatant_group/combatants	/m/018_lb	0
/m/02d42t	/people/person/profession	/m/02hrh1q	1
/m/0lfyx	/sports/sports_league/teams./sports/sports_league_participation/team	/m/0421v9q	0
/m/0d8w2n	/film/film/genre	/m/0219x_	1
/m/0gh6j94	/film/film_subject/films	/m/027l4q	0
/m/09728	/food/food/nutrients./food/nutrition_fact/nutrient	/m/09gvd	1
/m/018cqq	/location/hud_county_place/county	/m/02_33l	0
/m/0512p	/sports/professional_sports_team/draft_picks./sports/sports_league_draft_pick/school	/m/0f1nl	1
/m/0229rs	/location/location/contains	/m/03558l	0
/m/06439y	/sports/sports_league_draft/picks./sports/sports_league_draft_pick/school	/m/02ln0f	1
/m/01pxcf	/location/location/time_zones	/m/01rly6	0
/m/03xn3s2	/people/person/profession	/m/02hrh1q	1
/m/06ltr	/award/award_category/winners./award/award_honor/ceremony	/m/047csmy	0
/m/0bdxs5	/film/actor/film./film/performance/film	/m/07ykkx5	1
/m/06q8hf	/film/film/music	/m/07b2lv	0
/m/03t22m	/music/instrument/instrumentalists	/m/01qdjm	1
/m/04jwly	/medicine/disease/notable_people_with_this_condition	/m/016tbr	0
/m/01nkxvx	/music/artist/track_contributions./music/track_contribution/role	/m/07xzm	1
/m/07jmnh	/film/film/film_production_design_by	/m/0flj39	0
/m/023wyl	/sports/sports_position/players./sports/sports_team_roster/team	/m/0fgg8c	1
/m/01dvbd	/award/award_winner/awards_won./award/award_honor/award_winner	/m/03rz2b	0
/m/023zsh	/film/actor/film./film/performance/film	/m/057lbk	1
/m/0py9b	/tv/non_character_role/tv_regular_personal_appearances./tv/tv_regular_personal_appearance/person	/m/03_x5t	0
/m/0p_2r	/tv/tv_producer/programs_produced./tv/tv_producer_term/program	/m/0d68qy	1
/m/01_lhg	/sports/sports_league/teams./sports/sports_league_participation/team	/m/04zwc	0
/m/01q9b9	/people/person/profession	/m/016fly	1
/m/0mnyn	/award/award_ceremony/awards_presented./award/award_honor/honored_for	/m/05xjb	0
/m/02kz_	/people/person/employment_history./business/employment_tenure/company	/m/03y7ml	1
/m/01ld4n	/education/university/international_tuition./measurement_unit/dated_money_value/currency	/m/0k_p5	0
/m/07wtc	/education/educational_institution/students_graduates./education/education/major_field_of_study	/m/04rjg	1
/m/024rgt	/people/person/gender	/m/0bscw	0
/m/061xq	/sports/professional_sports_team/draft_picks./sports/sports_league_draft_pick/school	/m/09f2j	1
/m/01c9jp	/influence/influence_node/peers./influence/peer_relationship/peers	/m/09dfcj	0
/m/02jq1	/people/person/spouse_s./people/marriage/location_of_ceremony	/m/0cv3w	1
/m/013nky	/film/film/cinematography	/m/05gnf	0
/m/0blg2	/user/jg/default_domain/olympic_games/sports	/m/096f8	1
/m/0zdkh	/user/jg/default_domain/olympic_games/sports	/m/04n32	0
/m/012x4t	/award/award_nominee/award_nominations./award/award_nomination/award_nominee	/m/01w272y	1
/m/02gr81	/education/university/local_tuition./measurement_unit/dated_money_value/currency	/m/028_yv	0
/m/08pth9	/people/person/religion	/m/06nzl	1
/m/0n6ds	/film/film/film_festivals	/m/047vp1n	0
/m/0jbyg	/award/award_winner/awards_won./award/award_honor/award_winner	/m/0ddkf	1
/m/05bpg3	/music/performance_role/track_performances./music/track_contribution/role	/m/01s1zk	0
/m/0k3p	/base/biblioness/bibs_location/state	/m/0fqyc	1
/m/016fyc	/business/job_title/people_with_this_title./business/employment_tenure/company	/m/01t_vv	0
/m/0m7d0	/location/location/adjoin_s./location/adjoining_relationship/adjoins	/m/0mw93	1
/m/0cq8nx	/film/film_subject/films	/m/01d8yn	0
/m/0sz28	/base/popstra/celebrity/dated./base/popstra/dated/participant	/m/0152cw	1
/m/02vm9nd	/location/location/contains	/m/02_jjm	0
/m/0vbk	/location/location/contains	/m/0qxhc	1
/m/0167q3	/film/film/featured_film_locations	/m/0cq8nx	0
/m/0dvqq	/award/award_nominee/award_nominations./award/award_nomination/award	/m/01c427	1
/m/0jhd	/award/award_category/winners./award/award_honor/award_winner	/m/01vsy95	0
/m/027dtxw	/award/award_category/winners./award/award_honor/award_winner	/m/015wnl	1
/m/0dx8gj	/people/person/nationality	/m/04ns3gy	0
/m/011k11	/music/record_label/artist	/m/0277c3	1
/m/017fp	/award/award_category/winners./award/award_honor/ceremony	/m/09hz7t	0
/m/09bymc	/award/award_ceremony/awards_presented./award/award_honor/award_winner	/m/05ldnp	1
/m/04r7p	/base/popstra/celebrity/canoodled./base/popstra/canoodled/participant	/m/0c3zjn7	0
/m/08720	/film/film/other_crew./film/film_crew_gig/film_crew_role	/m/09zzb8	1
/m/014dq7	/location/location/adjoin_s./location/adjoining_relationship/adjoins	/m/01fwzk	0
/m/027s4dn	/award/award_category/winners./award/award_honor/ceremony	/m/09qftb	1
/m/044rvb	/film/film/prequel	/m/0nzny	0
/m/085h1	/user/ktrueman/default_domain/international_organization/member_states	/m/07dzf	1
/m/01c3q	/people/person/spouse_s./people/marriage/spouse	/m/01423b	0
/m/01nrq5	/film/actor/film./film/performance/film	/m/04g73n	1
/m/06l9n8	/tv/non_character_role/tv_regular_personal_appearances./tv/tv_regular_personal_appearance/person	/m/019q50	0
/m/0g1rw	/film/film_distributor/films_distributed./film/film_film_distributor_relationship/film	/m/0jqd3	1
/m/0bmpm	/olympics/olympic_games/sports	/m/047g8h	0
/m/026c1	/celebrities/celebrity/celebrity_friends./celebrities/friendship/friend	/m/0bksh	1
/m/07g2v	/film/film/film_festivals	/m/01938t	0
/m/03cxsvl	/award/award_nominee/award_nominations./award/award_nomination/award_nominee	/m/0fn8jc	1
/m/0mwyq	/music/instrument/family	/m/01v8y9	0
/m/026kmvf	/soccer/football_player/current_team./sports/sports_team_roster/team	/m/03v9yw	1
/m/0m24v	/government/politician/government_positions_held./government/government_position_held/basic_title	/m/01938t	0
/m/01fkr_	/tv/tv_network/programs./tv/tv_network_duration/program	/m/026b33f	1
/m/04v8x9	/military/military_combatant/military_conflicts./military/military_combatant_group/combatants	/m/03cxsvl	0
/m/02x2gy0	/award/award_category/nominees./award/award_nomination/nominated_for	/m/04qk12	1
/m/0pmn7	/people/person/nationality	/m/0mm1q	0
/m/0fpv_3_	/film/film/release_date_s./film/film_regional_release_date/film_release_region	/m/06f32	1
/m/017fp	/government/politician/government_positions_held./government/government_position_held/jurisdiction_of_office	/m/05fmy	0
/m/05kfs	/film/director/film	/m/09sr0	1
/m/05ldnp	/olympics/olympic_games/sports	/m/0gvbw	0
/m/0dwt5	/music/performance_role/track_performances./music/track_contribution/role	/m/07c6l	1
/m/0mwsh	/sports/sports_league/teams./sports/sports_league_participation/team	/m/0xn7q	0
/m/06151l	/award/award_nominee/award_nominations./award/award_nomination/award_nominee	/m/07h565	1
/m/0x0w	/sports/sports_team/colors	/m/01mylz	0
/m/057lbk	/film/film/featured_film_locations	/m/02_286	1
/m/02_qt	/film/film/genre	/m/09fqgj	0
/m/02xb2bt	/award/award_winner/awards_won./award/award_honor/award_winner	/m/0dgskx	1
/m/0n3g	/business/job_title/people_with_this_title./business/employment_tenure/company	/m/031hcx	0
/m/0d68qy	/award/award_winning_work/awards_won./award/award_honor/award_winner	/m/02778tk	1
/m/0h2zvzr	/film/film/film_production_design_by	/m/0cqh6z	0
/m/01vsy7t	/influence/influence_node/influenced_by	/m/048xh	1
/m/03q3sy	/people/person/sibling_s./people/sibling_relationship/sibling	/m/0mnyn	0
/m/06bss	/government/politician/government_positions_held./government/government_position_held/legislative_sessions	/m/04h1rz	1
/m/0133ch	/olympics/olympic_games/participating_countries	/m/02x8m	0
/m/026v437	/people/person/profession	/m/02hrh1q	1
/m/01gfhk	/film/film/produced_by	/m/05xjb	0
/m/01gv_f	/people/person/religion	/m/04pk9	1
/m/0gh6j94	/award/award_winning_work/awards_won./award/award_honor/honored_for	/m/0py9b	0
/m/044mfr	/people/person/profession	/m/02hrh1q	1
/m/03xn3s2	/tv/tv_producer/programs_produced./tv/tv_producer_term/program	/m/03xn3s2	0
/m/09d11	/medicine/disease/risk_factors	/m/03p41	1
/m/0hn2q	/dataworld/gardening_hint/split_to	/m/0ytc	0
/m/02tr7d	/people/person/gender	/m/02zsn	1
/m/057d89	/sports/professional_sports_team/draft_picks./sports/sports_league_draft_pick/draft	/m/049m_l	0
/m/0dyl9	/sports/sports_team_location/teams	/m/0jmbv	1
/m/0k3gw	/base/americancomedy/celebrity_impressionist/celebrities_impersonated	/m/054f2k	0
/m/0ddd0gc	/award/award_winning_work/awards_won./award/award_honor/award_winner	/m/0263tn1	1
/m/0gyfp9c	/location/location/partially_contains	/m/011yl_	0
/m/04lqvlr	/film/film/genre	/m/017fp	1
/m/06wzvr	/music/group_member/membership./music/group_membership/group	/m/03_x5t	0
/m/05bt6j	/music/genre/artists	/m/0gdh5	1
/m/0kr7k	/location/statistical_region/religions./location/religion_percentage/religion	/m/01mylz	0
/m/0dwtp	/music/performance_role/track_performances./music/track_contribution/role	/m/0151b0	1
/m/02m7r	/base/x2010fifaworldcupsouthafrica/world_cup_squad/current_world_cup_squad./base/x2010fifaworldcupsouthafrica/current_world_cup_squad/current_club	/m/018_lb	0
/m/06zgc	/olympics/olympic_sport/athletes./olympics/olympic_athlete_affiliation/country	/m/06bnz	1
/m/0421v9q	/media_common/netflix_genre/titles	/m/0l3h	0
/m/06v41q	/people/ethnicity/people	/m/058ncz	1
/m/0j1z8	/music/performance_role/regular_performances./music/group_membership/group	/m/0dp7wt	0
/m/09728	/food/food/nutrients./food/nutrition_fact/nutrient	/m/025sf0_	1
/m/0279c15	/user/jg/default_domain/olympic_games/sports	/m/03xnwz	0
/m/01tnxc	/award/award_nominee/award_nominations./award/award_nomination/nominated_for	/m/09cr8	1
/m/01cj6y	/film/film/costume_design_by	/m/025sf0_	0
/m/0bdxs5	/people/person/gender	/m/02zsn	1
/m/029kpy	/education/field_of_study/students_majoring./education/education/major_field_of_study	/m/02x4w6g	0
/m/0dbb3	/people/person/profession	/m/02hrh1q	1
/m/0mwsh	/sports/sports_team/colors	/m/04rsd2	0
/m/099p5	/people/person/religion	/m/04pk9	1
/m/0mkqr	/people/deceased_person/place_of_death	/m/013nky	0
/m/02d9k	/soccer/football_player/current_team./sports/sports_team_roster/team	/m/06l22	1
/m/01vsy7t	/film/film/language	/m/0f721s	0
/m/02kxbx3	/award/award_nominee/award_nominations./award/award_nomination/nominated_for	/m/02r1c18	1
/m/037lyl	/medicine/symptom/symptom_of	/m/0148nj	0
/m/028r4y	/award/award_winner/awards_won./award/award_honor/award_winner	/m/01tnxc	1
/m/01fwk3	/award/award_nominated_work/award_nominations./award/award_nomination/nominated_for	/m/01rgn3	0
/m/039c26	/award/award_winning_work/awards_won./award/award_honor/award	/m/09v7wsg	1
/m/03558l	/film/director/film	/m/0pyg6	0
/m/01trtc	/music/record_label/artist	/m/03y82t6	1
/m/04t53l	/people/person/languages	/m/03c_8t	0
/m/011ypx	/film/film/executive_produced_by	/m/05hj_k	1
/m/015wnl	/base/biblioness/bibs_location/country	/m/02rlj20	0
/m/0mm1q	/film/director/film	/m/01dvbd	1
/m/070mff	/base/popstra/celebrity/dated./base/popstra/dated/participant	/m/0clfdj	0
/m/092c5f	/award/award_ceremony/awards_presented./award/award_honor/honored_for	/m/01g03q	1
/m/0gh6j94	/olympics/olympic_sport/athletes./olympics/olympic_athlete_affiliation/country	/m/012x4t	0
/m/015gy7	/people/deceased_person/place_of_death	/m/02_286	1
/m/088n7	/organization/organization/headquarters./location/mailing_address/state_province_region	/m/013807	0
/m/014x77	/film/actor/film./film/performance/film	/m/0c0yh4	1
/m/05fh2	/base/schemastaging/organization_extra/phone_number./base/schemastaging/phone_sandbox/contact_category	/m/01lk02	0
/m/03lrht	/film/film/other_crew./film/film_crew_gig/film_crew_role	/m/09zzb8	1
/m/051_y	/education/educational_degree/people_with_this_degree./education/education/major_field_of_study	/m/050_qx	0
/m/0h95927	/film/film/release_date_s./film/film_regional_release_date/film_release_region	/m/06f32	1
/m/01wg3q	/sports/professional_sports_team/draft_picks./sports/sports_league_draft_pick/school	/m/034hwx	0
/m/011yl_	/award/award_winning_work/awards_won./award/award_honor/award	/m/02r22gf	1
/m/0gyfp9c	/education/educational_degree/people_with_this_degree./education/education/institution	/m/043tvp3	0
/m/0bytkq	/award/award_nominee/award_nominations./award/award_nomination/nominated_for	/m/03cp4cn	1
/m/0jm7n	/award/award_winner/awards_won./award/award_honor/award_winner	/m/08xz51	0
/m/02rwmk	/time/event/locations	/m/0166b	1
/m/01c9jp	/base/schemastaging/organization_extra/phone_number./base/schemastaging/phone_sandbox/service_location	/m/025cn2	0
/m/07vhb	/education/educational_institution/students_graduates./education/education/student	/m/01w03jv	1
/m/03f4xvm	/people/profession/specialization_of	/m/0178kd	0
/m/0fzyg	/film/film_subject/films	/m/025rvx0	1
/m/0kv9d3	/base/popstra/celebrity/dated./base/popstra/dated/participant	/m/0bytkq	0
/m/04lhc4	/award/award_winning_work/awards_won./award/award_honor/award	/m/027b9k6	1
/m/05v954	/tv/tv_producer/programs_produced./tv/tv_producer_term/program	/m/069ld1	0
/m/01kp66	/people/person/gender	/m/02zsn	1
/m/0bzk8w	/government/government_office_category/officeholders./government/government_position_held/jurisdiction_of_office	/m/03q0r1	0
/m/01_bkd	/music/genre/artists	/m/01vtqml	1
/m/08pn_9	/tv/non_character_role/tv_regular_personal_appearances./tv/tv_regular_personal_appearance/person	/m/058z1hb	0
/m/0jymd	/award/award_winning_work/awards_won./award/award_honor/award_winner	/m/070bjw	1
/m/01ld4n	/people/person/gender	/m/057d89	0
/m/02fqrf	/film/film/release_date_s./film/film_regional_release_date/film_release_region	/m/06bnz	1
/m/0h1_w	/music/artist/track_contributions./music/track_contribution/role	/m/04rsd2	0
/m/05hj_k	/people/person/sibling_s./people/sibling_relationship/sibling	/m/06q8hf	1
/m/0h1mt	/people/person/employment_history./business/employment_tenure/company	/m/02m77	0
/m/07ss8_	/award/award_nominee/award_nominations./award/award_nomination/award	/m/02f76h	1
/m/0_7z2	/dataworld/gardening_hint/split_to	/m/0l3h	0
/m/04954	/film/actor/film./film/performance/film	/m/02vqsll	1
/m/02ptzz0	/award/ranked_item/appears_in_ranked_lists./award/ranking/list	/m/02g40r	0
/m/01fc7p	/base/culturalevent/event/entity_involved	/m/03b79	1
/m/02qjpv5	/base/schemastaging/organization_extra/phone_number./base/schemastaging/phone_sandbox/contact_category	/m/01pxcf	0
/m/02vxq9m	/film/film/release_date_s./film/film_regional_release_date/film_release_region	/m/027rn	1
/m/015wnl	/military/military_conflict/combatants./military/military_combatant_group/combatants	/m/0137n0	0
/m/03xn3s2	/people/person/gender	/m/02zsn	1
/m/02fqrf	/people/profession/specialization_of	/m/02k856	0
/m/0fbvqf	/award/award_category/nominees./award/award_nomination/nominated_for	/m/0180mw	1
/m/01rnxn	/sports/sports_league_draft/picks./sports/sports_league_draft_pick/school	/m/01wz01	0
/m/099jhq	/award/award_category/nominees./award/award_nomination/nominated_for	/m/03cvvlg	1
/m/02kfzz	/award/ranked_item/appears_in_ranked_lists./award/ranking/list	/m/049m_l	0
/m/01cyd5	/education/educational_institution/school_type	/m/01rs41	1
/m/06wzvr	/film/film/other_crew./film/film_crew_gig/film_crew_role	/m/01htzx	0
/m/031t2d	/film/film/featured_film_locations	/m/02_286	1
/m/070mff	/olympics/olympic_participating_country/medals_won./olympics/olympic_medal_honor/olympics	/m/05b2f_k	0
/m/04n52p6	/film/film/genre	/m/02kdv5l	1
/m/0ytc	/sports/sports_team/colors	/m/01wz01	0
/m/0g22z	/film/film/cinematography	/m/06r_by	1
/m/0jhd	/location/hud_county_place/county	/m/0clzr	0
/m/06fmdb	/award/award_winner/awards_won./award/award_honor/award_winner	/m/01m3x5p	1
/m/0xn7q	/film/film/country	/m/096jwc	0
/m/01ypc	/baseball/baseball_team/team_stats./baseball/baseball_team_stats/season	/m/02h7s73	1
/m/06fmdb	/base/popstra/celebrity/dated./base/popstra/dated/participant	/m/0k_p5	0
/m/0dwt5	/music/performance_role/track_performances./music/track_contribution/role	/m/03q5t	1
/m/050023	/people/person/languages	/m/043cl9	0
/m/02pxst	/film/film/release_date_s./film/film_regional_release_date/film_release_region	/m/05r4w	1
/m/02qkk9_	/government/government_office_category/officeholders./government/government_position_held/jurisdiction_of_office	/m/018t8f	0
/m/03tcbx	/government/legislative_session/members./government/government_position_held/district_represented	/m/03s0w	1
/m/0222qb	/people/profession/specialization_of	/m/0fnb4	0
/m/034zc0	/award/award_nominee/award_nominations./award/award_nomination/award_nominee	/m/01vyv9	1
/m/01938t	/education/field_of_study/students_majoring./education/education/major_field_of_study	/m/02zsn	0
/m/0clfdj	/award/award_ceremony/awards_presented./award/award_honor/award_winner	/m/06j8wx	1
/m/089z0z	/film/film/costume_design_by	/m/035bcl	0
/m/01f39b	/tv/tv_program/regular_cast./tv/regular_tv_appearance/actor	/m/01gn36	1
/m/0g9zjp	/base/popstra/celebrity/friendship./base/popstra/friendship/participant	/m/0262yt	0
/m/02__ww	/film/actor/film./film/performance/film	/m/023gxx	1
/m/02jd_7	/film/film_distributor/films_distributed./film/film_film_distributor_relationship/film	/m/04zn7g	0
/m/027b9ly	/award/award_category/winners./award/award_honor/award_winner	/m/02kxbx3	1
/m/0cc846d	/government/political_party/politicians_in_this_party./government/political_party_tenure/politician	/m/0ghvb	0
/m/05k2xy	/film/film/executive_produced_by	/m/029m83	1
/m/04ljl_l	/award/award_winning_work/awards_won./award/award_honor/award	/m/02l1fn	0
/m/027dtxw	/award/award_category/nominees./award/award_nomination/nominated_for	/m/07s846j	1
/m/09lbv	/film/film/story_by	/m/0py9b	0
/m/02bwc7	/award/award_nominee/award_nominations./award/award_nomination/award	/m/0gqmvn	1
/m/0bmj2y	/people/person/profession	/m/03c_8t	0
/m/0lx2l	/award/award_nominee/award_nominations./award/award_nomination/award	/m/0279c15	1
/m/01m3x5p	/user/alexander/philosophy/philosopher/interests	/m/0cdf37	0
/m/016ggh	/people/person/profession	/m/02hrh1q	1
/m/0pd6l	/people/deceased_person/place_of_burial	/m/04xm_	0
/m/02hhtj	/base/popstra/celebrity/canoodled./base/popstra/canoodled/participant	/m/02_hj4	1
/m/03cf9ly	/government/politician/government_positions_held./government/government_position_held/basic_title	/m/02mg7n	0
/m/01fwpt	/people/person/profession	/m/02hrh1q	1
/m/017236	/film/film/prequel	/m/0qy5v	0
/m/0z4s	/film/actor/film./film/performance/film	/m/035bcl	1
/m/02qkk9_	/medicine/disease/risk_factors	/m/02f8zw	0
/m/02x4wr9	/award/award_category/nominees./award/award_nomination/nominated_for	/m/0209xj	1
/m/0jhd	/base/culturalevent/event/entity_involved	/m/08jfkw	0
/m/05bt6j	/music/genre/artists	/m/09nhvw	1
/m/0mm1q	/film/film/personal_appearances./film/personal_film_appearance/person	/m/03wkwg	0
/m/03ysmg	/people/person/profession	/m/02jknp	1
/m/01kk32	/music/performance_role/regular_performances./music/group_membership/group	/m/049m_l	0
/m/02qfhb	/base/popstra/celebrity/dated./base/popstra/dated/participant	/m/01mqh5	1
/m/0sxg4	/olympics/olympic_games/participating_countries	/m/03pm9	0
/m/0j8f09z	/film/film/release_date_s./film/film_regional_release_date/film_release_region	/m/06bnz	1
/m/0jrhl	/organization/organization/headquarters./location/mailing_address/citytown	/m/03lpd0	0
/m/063lqs	/award/award_winner/awards_won./award/award_honor/award_winner	/m/070m12	1
/m/0bm2nq	/government/politician/government_positions_held./government/government_position_held/jurisdiction_of_office	/m/022h5x	0
/m/04p_hy	/education/educational_institution/school_type	/m/01rs41	1
/m/05218gr	/base/saturdaynightlive/snl_cast_member/seasons./base/saturdaynightlive/snl_season_tenure/cast_members	/m/0xn7q	0
/m/025rvx0	/film/film/genre	/m/01j1n2	1
/m/09v42sf	/sports/sports_team/sport	/m/05typm	0
/m/0dwt5	/music/performance_role/track_performances./music/track_contribution/role	/m/01vj9c	1
/m/01dpsv	/people/ethnicity/languages_spoken	/m/01423b	0
/m/019n9w	/education/educational_institution/students_graduates./education/education/student	/m/016h4r	1
/m/023gxx	/base/schemastaging/organization_extra/phone_number./base/schemastaging/phone_sandbox/service_location	/m/023nlj	0
/m/0827d	/music/genre/artists	/m/01vsy95	1
/m/02rlj20	/people/person/gender	/m/0134w7	0
/m/04zx3q1	/education/educational_degree/people_with_this_degree./education/education/institution	/m/027kp3	1
/m/0lbj1	/people/person/languages	/m/0flj39	0
/m/03f2_rc	/award/award_nominee/award_nominations./award/award_nomination/award_nominee	/m/020jqv	1
/m/0f4yh	/tv/tv_producer/programs_produced./tv/tv_producer_term/program	/m/019bnn	0
/m/0gr42	/award/award_category/nominees./award/award_nomination/nominated_for	/m/01kf3_9	1
/m/027dtv3	/base/schemastaging/organization_extra/phone_number./base/schemastaging/phone_sandbox/service_language	/m/0222qb	0
/m/018_lb	/people/person/gender	/m/02zsn	1
/m/0gvbw	/location/capital_of_administrative_division/capital_of./location/administrative_division_capital_relationship/administrative_division	/m/02rh1dz	0
/m/07q1m	/award/award_winning_work/awards_won./award/award_honor/award_winner	/m/026dx	1
/m/017lb_	/celebrities/celebrity/sexual_relationships./celebrities/romantic_relationship/celebrity	/m/01s1zk	0
/m/01pkhw	/award/award_nominee/award_nominations./award/award_nomination/nominated_for	/m/0bs5vty	1
/m/01t07j	/film/film/film_art_direction_by	/m/05nrkb	0
/m/05f4m9q	/award/award_category/winners./award/award_honor/award_winner	/m/0hqly	1
/m/0h7jp	/organization/organization/place_founded	/m/01wz01	0
/m/043hg	/people/person/profession	/m/02hrh1q	1
/m/0fgg8c	/dataworld/gardening_hint/split_to	/m/02404v	0
/m/0c3p7	/base/popstra/celebrity/dated./base/popstra/dated/participant	/m/01gbn6	1
/m/0h1_w	/film/film/genre	/m/01hl_w	0
/m/01309x	/award/award_nominee/award_nominations./award/award_nomination/award_nominee	/m/01qkqwg	1
/m/0bmj2y	/medicine/disease/risk_factors	/m/0m32h	0
/m/01795t	/award/award_nominee/award_nominations./award/award_nomination/nominated_for	/m/0639bg	1
/m/03mszl	/baseball/baseball_team/team_stats./baseball/baseball_team_stats/season	/m/02lk95	0
/m/01kp66	/people/person/profession	/m/02hrh1q	1
/m/030wkp	/people/profession/specialization_of	/m/0kr7k	0
/m/08jyyk	/music/genre/artists	/m/0274ck	1
/m/0gyfp9c	/film/film/film_production_design_by	/m/0bmpm	0
/m/01hkhq	/award/award_winner/awards_won./award/award_honor/award_winner	/m/02tr7d	1
/m/02w670	/film/film/music	/m/043tvp3	0
/m/02r1c18	/film/film/release_date_s./film/film_regional_release_date/film_release_region	/m/03_3d	1
/m/0bkbm	/location/administrative_division/country	/m/0qtz9	0
/m/0jz9f	/organization/organization/headquarters./location/mailing_address/citytown	/m/02_286	1
/m/02qjpv5	/base/schemastaging/organization_extra/phone_number./base/schemastaging/phone_sandbox/service_language	/m/03tk6z	0
/m/0fqyc	/base/aareas/schema/administrative_area/capital	/m/0h095	1
/m/05r4w	/sports/sports_team/roster./baseball/baseball_roster_position/position	/m/02rzdcp	0
/m/05yvfd	/people/person/profession	/m/02hrh1q	1
/m/05xjb	/base/schemastaging/organization_extra/phone_number./base/schemastaging/phone_sandbox/service_language	/m/0bv7t	0
/m/04ls81	/sports/sports_team/roster./american_football/football_historical_roster_position/position_s	/m/05fyy5	1
/m/0z4s	/people/ethnicity/languages_spoken	/m/012_53	0
/m/051hrr	/music/performance_role/track_performances./music/track_contribution/role	/m/0dwt5	1
/m/033smt	/organization/organization/place_founded	/m/099c8n	0
/m/06lht1	/award/award_nominee/award_nominations./award/award_nomination/nominated_for	/m/01g03q	1
/m/0bm2nq	/people/deceased_person/place_of_burial	/m/0cqh6z	0
/m/091yn0	/award/award_nominee/award_nominations./award/award_nomination/award_nominee	/m/07ymr5	1
/m/04gm78f	/sports/sports_league/teams./sports/sports_league_participation/team	/m/027ffq	0
/m/014zfs	/award/award_nominee/award_nominations./award/award_nomination/award	/m/019bnn	1
/m/03fnyk	/base/marchmadness/ncaa_basketball_tournament/seeds./base/marchmadness/ncaa_tournament_seed/team	/m/0gsy3b	0
/m/07fsv	/organization/organization_member/member_of./organization/organization_membership/organization	/m/07t65	1
/m/020hh3	/people/deceased_person/place_of_burial	/m/06hhp	0
/m/02xb2bt	/award/award_nominee/award_nominations./award/award_nomination/nominated_for	/m/0ddd0gc	1
/m/05c74	/education/university/international_tuition./measurement_unit/dated_money_value/currency	/m/0fgg8c	0
/m/0h03fhx	/film/film/release_date_s./film/film_regional_release_date/film_release_region	/m/0166b	1
/m/03f4xvm	/film/film/release_date_s./film/film_regional_release_date/film_release_region	/m/03hvk2	0
/m/03hmr_	/people/person/place_of_birth	/m/01_d4	1
/m/0jclr	/film/film_distributor/films_distributed./film/film_film_distributor_relationship/film	/m/0jclr	0
/m/05z7c	/award/ranked_item/appears_in_ranked_lists./award/ranking/list	/m/05glt	1
/m/01whvs	/location/country/capital	/m/03ftmg	0
/m/02k5sc	/award/award_nominee/award_nominations./award/award_nomination/award_nominee	/m/06mt91	1
/m/0bzk8w	/base/localfood/seasonal_month/produce_available./base/localfood/produce_availability/seasonal_months	/m/0r2bv	0
/m/0dc7hc	/film/film/genre	/m/02kdv5l	1
/m/04rjg	/base/schemastaging/organization_extra/phone_number./base/schemastaging/phone_sandbox/service_language	/m/017lb_	0
/m/02896	/sports/professional_sports_team/draft_picks./sports/sports_league_draft_pick/school	/m/0325dj	1
/m/0x0w	/location/hud_county_place/county	/m/01kk32	0
/m/016clz	/music/genre/artists	/m/01vsnff	1
/m/01pcz9	/tv/tv_producer/programs_produced./tv/tv_producer_term/program	/m/05mv4	0
/m/01vw20_	/award/award_nominee/award_nominations./award/award_nomination/award	/m/01c427	1
/m/0l14v3	/military/military_conflict/combatants./military/military_combatant_group/combatants	/m/030nwm	0
/m/01_bkd	/music/genre/parent_genre	/m/01243b	1
/m/02phtzk	/base/popstra/location/vacationers./base/popstra/vacation_choice/vacationer	/m/01w1sx	0
/m/017fp	/media_common/netflix_genre/titles	/m/05jzt3	1
/m/051ls	/tv/tv_program/genre	/m/06mq7	0
/m/05qg6g	/people/person/gender	/m/02zsn	1
/m/017fp	/film/film/language	/m/0bp_7	0
/m/03h2d4	/award/award_nominee/award_nominations./award/award_nomination/nominated_for	/m/04n52p6	1
/m/023nlj	/people/person/profession	/m/018cqq	0
/m/0bxtg	/award/award_winner/awards_won./award/award_honor/award_winner	/m/05hj0n	1
/m/04q01mn	/organization/organization/headquarters./location/mailing_address/citytown	/m/047csmy	0
/m/06j6l	/music/genre/artists	/m/01wk7ql	1
/m/0qyzb	/organization/organization/headquarters./location/mailing_address/state_province_region	/m/02jd_7	0
/m/0c0k1	/people/person/place_of_birth	/m/01_d4	1
/m/01flzb	/soccer/football_player/current_team./sports/sports_team_roster/team	/m/01jtp7	0
/m/05kwx2	/award/award_nominee/award_nominations./award/award_nomination/award	/m/027dtxw	1
/m/043tvp3	/influence/influence_node/influenced_by	/m/0jhd	0
/m/0jm4b	/sports/sports_team/roster./basketball/basketball_roster_position/position	/m/0ctt4z	1
/m/05sbv3	/people/ethnicity/geographic_distribution	/m/0mwyq	0
/m/0k4p0	/award/award_winning_work/awards_won./award/award_honor/award_winner	/m/029m83	1
/m/01f2w0	/people/ethnicity/languages_spoken	/m/034bs	0
/m/0d1_f	/people/person/gender	/m/02zsn	1
/m/01hl_w	/celebrities/celebrity/celebrity_friends./celebrities/friendship/friend	/m/05218gr	0
/m/0n08r	/film/film/genre	/m/0hfjk	1
/m/0262yt	/award/ranked_item/appears_in_ranked_lists./award/ranking/list	/m/01wkmgb	0
/m/0456xp	/base/popstra/celebrity/friendship./base/popstra/friendship/participant	/m/05bnp0	1
/m/09m6kg	/award/award_category/nominees./award/award_nomination/nominated_for	/m/0c5x_	0
/m/03d0ns	/base/popstra/celebrity/dated./base/popstra/dated/participant	/m/01t07j	1
/m/02qjv1p	/tv/tv_network/programs./tv/tv_network_duration/program	/m/0296y	0
/m/03_0p	/award/award_winner/awards_won./award/award_honor/award_winner	/m/0149xx	1
/m/07k2mq	/award/award_nominee/award_nominations./award/award_nomination/award	/m/02z6gky	0
/m/05qg6g	/people/person/places_lived./people/place_lived/location	/m/027rn	1
/m/02k13d	/award/award_winning_work/awards_won./award/award_honor/award	/m/0_7z2	0
/m/0kjgl	/award/award_nominee/award_nominations./award/award_nomination/nominated_for	/m/02fqxm	1
/m/0n6f8	/media_common/netflix_genre/titles	/m/0257wh	0
/m/01g888	/music/genre/artists	/m/02k5sc	1
/m/08j7lh	/film/film/cinematography	/m/011yth	0
/m/07sc6nw	/film/film/genre	/m/02kdv5l	1
/m/02h2z_	/film/film/release_date_s./film/film_regional_release_date/film_regional_debut_venue	/m/01vsy7t	0
/m/02d49z	/film/film/genre	/m/01j1n2	1
/m/04hpck	/location/capital_of_administrative_division/capital_of./location/administrative_division_capital_relationship/administrative_division	/m/09b6zr	0
/m/02822	/education/field_of_study/students_majoring./education/education/student	/m/0c3p7	1
/m/058vy5	/music/performance_role/regular_performances./music/group_membership/role	/m/0304nh	0
/m/0jz9f	/film/film_distributor/films_distributed./film/film_film_distributor_relationship/film	/m/01f8gz	1
/m/04c9bn	/film/film/film_production_design_by	/m/05fh2	0
/m/0k3k1	/location/location/contains	/m/0qkcb	1
/m/0drs_	/military/military_conflict/combatants./military/military_combatant_group/combatants	/m/010rvx	0
/m/02xry	/location/location/contains	/m/0rqf1	1
/m/07b1gq	/film/film/story_by	/m/04c9bn	0
/m/06zgc	/olympics/olympic_sport/athletes./olympics/olympic_athlete_affiliation/country	/m/03_3d	1
/m/01chpn	/tv/non_character_role/tv_regular_personal_appearances./tv/tv_regular_personal_appearance/person	/m/038_3y	0
/m/01795t	/film/film_distributor/films_distributed./film/film_film_distributor_relationship/film	/m/063fh9	1
/m/0cpz4k	/government/politician/government_positions_held./government/government_position_held/basic_title	/m/05ldnp	0
/m/0g5ptf	/film/film/genre	/m/02kdv5l	1
/m/0486tv	/location/country/capital	/m/0bp_7	0
/m/0mbct	/music/performance_role/track_performances./music/track_contribution/role	/m/011k_j	1
/m/03pm9	/user/jg/default_domain/olympic_games/sports	/m/01mgw	0
/m/027dtxw	/award/award_category/winners./award/award_honor/award_winner	/m/016ggh	1
/m/02ptzz0	/music/genre/parent_genre	/m/010rvx	0
/m/0dc7hc	/film/film/music	/m/03c_8t	1
/m/015wnl	/organization/organization/child./organization/organization_relationship/child	/m/0ytc	0
/m/05x8n	/award/award_nominee/award_nominations./award/award_nomination/award	/m/0262yt	1
/m/01mgw	/people/ethnicity/languages_spoken	/m/0f04v	0
/m/0841zn	/soccer/football_player/current_team./sports/sports_team_roster/team	/m/015_z1	1
/m/01jtp7	/business/job_title/people_with_this_title./business/employment_tenure/company	/m/0fbw6	0
/m/0c01c	/people/person/gender	/m/02zsn	1
/m/0x0w	/film/film/prequel	/m/02jsgf	0
/m/0z4s	/film/actor/film./film/performance/film	/m/026gyn_	1
/m/027l4q	/location/location/adjoin_s./location/adjoining_relationship/adjoins	/m/03g62	0
/m/02tr7d	/award/award_winner/awards_won./award/award_honor/award_winner	/m/03w1v2	1
/m/030nwm	/tv/tv_network/programs./tv/tv_network_duration/program	/m/0l14v3	0
/m/07vjm	/education/educational_institution/colors	/m/01l849	1
/m/02w86hz	/base/popstra/celebrity/breakup./base/popstra/breakup/participant	/m/0mkqr	0
/m/015c4g	/award/award_nominee/award_nominations./award/award_nomination/award	/m/04ljl_l	1
/m/0152cw	/celebrities/celebrity/celebrity_friends./celebrities/friendship/friend	/m/05ry0p	0
/m/01trhmt	/people/person/profession	/m/02hrh1q	1
/m/02ln0f	/government/politician/government_positions_held./government/government_position_held/legislative_sessions	/m/0mnyn	0
/m/02py4c8	/tv/tv_program/regular_cast./tv/regular_tv_appearance/actor	/m/0159h6	1
/m/02rwmk	/award/award_nominee/award_nominations./award/award_nomination/award	/m/0gtgp6	0
/m/024_vw	/government/politician/government_positions_held./government/government_position_held/legislative_sessions	/m/02bn_p	1
/m/03wkwg	/award/award_nominated_work/award_nominations./award/award_nomination/nominated_for	/m/02w86hz	0
/m/03j24kf	/award/award_nominee/award_nominations./award/award_nomination/award	/m/01ck6h	1
/m/02zfg3	/baseball/baseball_team/team_stats./baseball/baseball_team_stats/season	/m/01lk02	0
/m/03v0t	/location/location/contains	/m/02zd2b	1
/m/0l4vc	/award/award_category/winners./award/award_honor/ceremony	/m/090gpr	0
/m/0k3k1	/location/location/contains	/m/01lxw6	1
/m/0638kv	/celebrities/celebrity/sexual_relationships./celebrities/romantic_relationship/celebrity	/m/0gfmc_	0
/m/01cj6y	/film/actor/film./film/performance/film	/m/02dr9j	1
/m/017236	/olympics/olympic_games/participating_countries	/m/0680m7	0
/m/0jymd	/film/film/featured_film_locations	/m/02_286	1
/m/0mwsh	/film/film/release_date_s./film/film_regional_release_date/film_release_region	/m/04rsd2	0
/m/016dgz	/people/person/place_of_birth	/m/02_286	1
/m/010rvx	/film/film/country	/m/033srr	0
/m/01tnxc	/award/award_nominee/award_nominations./award/award_nomination/nominated_for	/m/04jwly	1
/m/08fbnx	/tv/tv_program/regular_cast./tv/regular_tv_appearance/actor	/m/0mn6	0
/m/03m5y9p	/film/film/country	/m/03h64	1
/m/01y3v	/olympics/olympic_games/sports	/m/0h6rm	0
/m/02x3lt7	/film/film/produced_by	/m/016qtt	1
/m/04lhc4	/sports/pro_athlete/teams./sports/sports_team_roster/team	/m/0262yt	0
/m/0pyg6	/award/award_nominee/award_nominations./award/award_nomination/award	/m/01c9jp	1
/m/0263ycg	/film/film/cinematography	/m/0_z91	0
/m/0ct5zc	/film/film/release_date_s./film/film_regional_release_date/film_release_region	/m/03_3d	1
/m/02qkk9_	/media_common/netflix_genre/titles	/m/01d8yn	0
/m/02yr1q	/education/educational_institution/students_graduates./education/education/major_field_of_study	/m/05qjt	1
/m/0flj39	/film/film/music	/m/01wyz92	0
/m/09bymc	/award/award_ceremony/awards_presented./award/award_honor/award_winner	/m/01pcz9	1
/m/053y4h	/sports/sports_team/roster./american_football/football_historical_roster_position/position_s	/m/07_fl	0
/m/02404v	/award/award_nominee/award_nominations./award/award_nomination/nominated_for	/m/01f8f7	1
/m/08fbnx	/education/educational_institution/colors	/m/0462hhb	0
/m/0fbtm7	/sports/sports_team/roster./american_football/football_roster_position/position	/m/02vkdwz	1
/m/0680m7	/base/aareas/schema/administrative_area/capital	/m/030w19	0
/m/0r4xt	/location/location/time_zones	/m/02lcqs	1
/m/0cq7kw	/user/jg/default_domain/olympic_games/sports	/m/03wjb7	0
/m/07kcvl	/sports/sports_team/roster./american_football/football_historical_roster_position/position_s	/m/023wyl	1
/m/01r216	/influence/influence_node/peers./influence/peer_relationship/peers	/m/03558l	0
/m/0g768	/music/record_label/artist	/m/0565cz	1
/m/0d9fz	/music/genre/parent_genre	/m/01fh0q	0
/m/0gyy0	/film/actor/film./film/performance/film	/m/09sr0	1
/m/027dtv3	/award/ranked_item/appears_in_ranked_lists./award/ranking/list	/m/0h1mt	0
/m/0421v9q	/film/film/release_date_s./film/film_regional_release_date/film_release_region	/m/047lj	1
/m/01jrp0	/influence/influence_node/peers./influence/peer_relationship/peers	/m/08pth9	0
/m/04shbh	/celebrities/celebrity/sexual_relationships./celebrities/romantic_relationship/celebrity	/m/014x77	1
/m/0qmjd	/organization/role/leaders./organization/leadership/organization	/m/04cx5	0
/m/0306ds	/award/award_nominee/award_nominations./award/award_nomination/award_nominee	/m/01kp66	1
/m/01rnxn	/film/film/music	/m/01d5vk	0
/m/0h95zbp	/film/film/release_date_s./film/film_regional_release_date/film_release_region	/m/03h64	1
/m/0421v9q	/award/award_nominee/award_nominations./award/award_nomination/nominated_for	/m/0pmn7	0
/m/01kb2j	/award/award_nominee/award_nominations./award/award_nomination/award_nominee	/m/0z4s	1
/m/0421v9q	/people/person/places_lived./people/place_lived/location	/m/015_z1	0
/m/033srr	/film/film/genre	/m/02kdv5l	1
/m/05mc7y	/baseball/baseball_team/team_stats./baseball/baseball_team_stats/season	/m/0296y	0
/m/05c74	/organization/organization_member/member_of./organization/organization_membership/organization	/m/02vk52z	1
/m/01fx4k	/tv/tv_network/programs./tv/tv_network_duration/program	/m/0fbx6	0
/m/07s6fsf	/education/educational_degree/people_with_this_degree./education/education/institution	/m/01rc6f	1
/m/089z0z	/music/group_member/membership./music/group_membership/role	/m/0fbx6	0
/m/08815	/education/educational_institution/students_graduates./education/education/major_field_of_study	/m/02822	1
/m/03558l	/film/film/other_crew./film/film_crew_gig/film_crew_role	/m/01cjhz	0
/m/0dp7wt	/award/award_winning_work/awards_won./award/award_honor/award	/m/04ljl_l	1
/m/0bczgm	/sports/sports_team/roster./basketball/basketball_roster_position/position	/m/051_y	0
/m/0bt4g	/award/award_winning_work/awards_won./award/award_honor/award	/m/0262s1	1
/m/0cq7kw	/olympics/olympic_games/participating_countries	/m/05rrw9	0
/m/06q5t7	/base/popstra/celebrity/dated./base/popstra/dated/participant	/m/02pjvc	1
/m/03xn3s2	/music/performance_role/regular_performances./music/group_membership/group	/m/08pn_9	0
/m/099jhq	/award/award_category/nominees./award/award_nomination/nominated_for	/m/0btpm6	1
/m/06s26c	/education/educational_institution/school_type	/m/0k_p5	0
/m/02qvyrt	/award/award_category/nominees./award/award_nomination/nominated_for	/m/02rn00y	1
/m/02qkk9_	/government/politician/government_positions_held./government/government_position_held/legislative_sessions	/m/04t7ts	0
/m/0p0fc	/location/location/time_zones	/m/02hczc	1
/m/05nqz	/film/film/music	/m/0r03f	0
/m/01vs4ff	/music/group_member/membership./music/group_membership/group	/m/06nv27	1
/m/01sqd7	/people/person/employment_history./business/employment_tenure/company	/m/0jnwx	0
/m/02z1nbg	/award/award_category/winners./award/award_honor/award_winner	/m/0159h6	1
/m/0py9b	/sports/sports_position/players./sports/sports_team_roster/team	/m/04lhc4	0
/m/04_by	/people/person/gender	/m/02zsn	1
/m/0ghvb	/sports/sports_team/roster./american_football/football_historical_roster_position/position_s	/m/0dzkq	0
/m/02bqmq	/government/legislative_session/members./government/government_position_held/legislative_sessions	/m/03tcbx	1
/m/02q_ncg	/education/educational_institution/students_graduates./education/education/student	/m/0mwm6	0
/m/05qbbfb	/film/film/other_crew./film/film_crew_gig/film_crew_role	/m/033smt	1
/m/013f9v	/location/administrative_division/country	/m/01hl_w	0
/m/03wjm2	/film/film/executive_produced_by	/m/0282x	1
/m/05q9g1	/base/localfood/seasonal_month/produce_available./base/localfood/produce_availability/seasonal_months	/m/02m77	0
/m/08jfkw	/film/actor/film./film/performance/film	/m/09m6kg	1
/m/05ry0p	/film/film/featured_film_locations	/m/026f__m	0
/m/089z0z	/people/person/place_of_birth	/m/02_286	1
/m/016z2j	/tv/tv_personality/tv_regular_appearances./tv/tv_regular_personal_appearance/program	/m/03ftmg	0
/m/0512p	/baseball/baseball_team/team_stats./baseball/baseball_team_stats/season	/m/027mvrc	1
/m/0229rs	/film/film/personal_appearances./film/personal_film_appearance/person	/m/0c0yh4	0
/m/01wy6	/music/performance_role/regular_performances./music/group_membership/role	/m/0j862	1
/m/0jclr	/people/deceased_person/place_of_burial	/m/02g_6x	0
/m/07l50vn	/film/film/release_date_s./film/film_regional_release_date/film_release_region	/m/06bnz	1
/m/04x8mj	/award/award_nominated_work/award_nominations./award/award_nomination/nominated_for	/m/03bw6	0
/m/0m63c	/film/film/release_date_s./film/film_regional_release_date/film_release_region	/m/03h64	1
/m/01mv_n	/film/film_subject/films	/m/0n4z2	0
/m/0h_cssd	/award/award_ceremony/awards_presented./award/award_honor/award_winner	/m/0bytkq	1
/m/0mvxt	/sports/sports_team/roster./american_football/football_historical_roster_position/position_s	/m/05gnf	0
/m/0g5lhl7	/award/award_winner/awards_won./award/award_honor/award_winner	/m/026v1z	1
/m/01l3mk3	/film/film/other_crew./film/film_crew_gig/crewmember	/m/0qyzb	0
/m/0337vz	/award/award_nominee/award_nominations./award/award_nomination/award_nominee	/m/07myb2	1
/m/07g2v	/olympics/olympic_participating_country/medals_won./olympics/olympic_medal_honor/olympics	/m/0jnwx	0
/m/01fwk3	/people/person/profession	/m/01445t	1
/m/047g8h	/tv/tv_program/program_creator	/m/02_qt	0
/m/0c00zd0	/film/film/other_crew./film/film_crew_gig/film_crew_role	/m/09zzb8	1
/m/0k7pf	/base/biblioness/bibs_location/country	/m/043tvp3	0
/m/02hxhz	/film/film/featured_film_locations	/m/02_286	1
/m/029kpy	/location/location/contains	/m/01cjhz	0
/m/012f86	/people/ethnicity/geographic_distribution	/m/06bnz	1
/m/054f2k	/business/business_operation/industry	/m/07b1gq	0
/m/07xzm	/music/performance_role/regular_performances./music/group_membership/role	/m/01wy6	1
/m/0fzm0g	/location/country/form_of_government	/m/04rjg	0
/m/09rvcvl	/film/film/other_crew./film/film_crew_gig/film_crew_role	/m/09zzb8	1
/m/04f6hhm	/people/cause_of_death/people	/m/0dzkq	0
/m/01yhm	/baseball/baseball_team/team_stats./baseball/baseball_team_stats/season	/m/02h7s73	1
/m/02_qt	/government/government_office_category/officeholders./government/government_position_held/jurisdiction_of_office	/m/047g8h	0
/m/05bpg3	/film/actor/film./film/performance/film	/m/05dss7	1
/m/047g8h	/music/group_member/membership./music/group_membership/group	/m/01pxcf	0
/m/027dtxw	/award/award_category/nominees./award/award_nomination/nominated_for	/m/0b44shh	1
/m/05b2f_k	/film/film_subject/films	/m/04r7p	0
/m/02xv8m	/award/award_winner/awards_won./award/award_honor/award_winner	/m/0ksrf8	1
/m/0c_md_	/film/film/music	/m/02j4sk	0
/m/01ypc	/sports/professional_sports_team/draft_picks./sports/sports_league_draft_pick/school	/m/01pl14	1
/m/0c5x_	/people/profession/specialization_of	/m/038_3y	0
/m/0ksrf8	/award/award_nominee/award_nominations./award/award_nomination/nominated_for	/m/02vqsll	1
/m/0bh8x1y	/music/artist/origin	/m/014dq7	0
/m/01j5ts	/people/person/gender	/m/02zsn	1
/m/03c_8t	/medicine/symptom/symptom_of	/m/02x8m	0
/m/01l79yc	/people/person/gender	/m/02zsn	1
/m/0l34j	/base/schemastaging/organization_extra/phone_number./base/schemastaging/phone_sandbox/service_location	/m/017dbx	0
/m/0f1nl	/education/educational_institution/colors	/m/01l849	1
/m/0cq7kw	/food/food/nutrients./food/nutrition_fact/nutrient	/m/0n6f8	0
/m/0mw7h	/location/location/adjoin_s./location/adjoining_relationship/adjoins	/m/0mwsh	1
/m/07b1gq	/organization/endowed_organization/endowment./measurement_unit/dated_money_value/currency	/m/02phtzk	0
/m/052gzr	/people/person/profession	/m/02jknp	1
/m/023nlj	/dataworld/gardening_hint/split_to	/m/01jrp0	0
/m/044rvb	/film/actor/film./film/performance/film	/m/02rlj20	1
/m/01d8yn	/film/film/runtime./film/film_cut/film_release_region	/m/0bp_7	0
/m/0gj8t_b	/film/film/release_date_s./film/film_regional_release_date/film_release_region	/m/03_3d	1
/m/04rs03	/olympics/olympic_games/participating_countries	/m/0p_r5	0
/m/0jnb0	/people/person/profession	/m/02jknp	1
/m/02fqrf	/base/aareas/schema/administrative_area/administrative_parent	/m/05q9g1	0
/m/0c9k8	/award/award_winning_work/awards_won./award/award_honor/award_winner	/m/039x1k	1
/m/0486tv	/location/country/form_of_government	/m/0n048	0
/m/02k54	/organization/organization_member/member_of./organization/organization_membership/organization	/m/02vk52z	1
/m/03wkwg	/military/military_conflict/combatants./military/military_combatant_group/combatants	/m/023nlj	0
/m/01zq91	/government/government_office_category/officeholders./government/government_position_held/jurisdiction_of_office	/m/05r4w	1
/m/0f4yh	/olympics/olympic_games/sports	/m/027ffq	0
/m/02x4wr9	/award/award_category/winners./award/award_honor/award_winner	/m/015c4g	1
/m/03jl0_	/people/person/languages	/m/0kjgl	0
/m/0gr42	/award/award_category/nominees./award/award_nomination/nominated_for	/m/08phg9	1
/m/04gqr	/film/film/runtime./film/film_cut/film_release_region	/m/028r4y	0
/m/05mlqj	/film/actor/film./film/performance/film	/m/0c9t0y	1
/m/027dtv3	/education/educational_institution/students_graduates./education/education/major_field_of_study	/m/0674hk	0
/m/09sr0	/award/award_winning_work/awards_won./award/award_honor/award_winner	/m/021yc7p	1
/m/03fmfs	/music/performance_role/regular_performances./music/group_membership/group	/m/0cdf37	0
/m/016ggh	/award/award_nominee/award_nominations./award/award_nomination/award	/m/027dtxw	1
/m/01x1cn2	/base/popstra/celebrity/friendship./base/popstra/friendship/participant	/m/0jnm_	0
/m/07w0v	/education/educational_institution/students_graduates./education/education/student	/m/02sb1w	1
/m/0bscw	/award/award_nominee/award_nominations./award/award_nomination/award_nominee	/m/0892sx	0
/m/016clz	/music/genre/artists	/m/012ycy	1
/m/016vn3	/government/government_office_category/officeholders./government/government_position_held/jurisdiction_of_office	/m/0306ds	0
/m/025s1wg	/film/film/genre	/m/02kdv5l	1
/m/0m32h	/location/location/contains	/m/05fkf	0
/m/0cqh6z	/award/award_category/nominees./award/award_nomination/nominated_for	/m/01g03q	1
/m/033srr	/award/award_ceremony/awards_presented./award/award_honor/honored_for	/m/01mylz	0
/m/02r22gf	/award/award_category/nominees./award/award_nomination/nominated_for	/m/016kz1	1
/m/016qtt	/people/deceased_person/place_of_burial	/m/0ck1d	0
/m/033jj1	/people/person/profession	/m/02hrh1q	1
/m/0bytkq	/sports/sports_team/roster./baseball/baseball_roster_position/position	/m/0mn6	0
/m/01kb2j	/people/person/places_lived./people/place_lived/location	/m/0mnyn	1
/m/01gfhk	/base/schemastaging/organization_extra/phone_number./base/schemastaging/phone_sandbox/service_location	/m/0mwsh	0
/m/016clz	/music/genre/artists	/m/02g40r	1
/m/03xn3s2	/organization/organization/place_founded	/m/0kvqv	0
/m/0180mw	/tv/tv_program/regular_cast./tv/regular_tv_appearance/actor	/m/014zcr	1
/m/04q01mn	/base/x2010fifaworldcupsouthafrica/world_cup_squad/current_world_cup_squad./base/x2010fifaworldcupsouthafrica/current_world_cup_squad/current_club	/m/025_64l	0
/m/099c8n	/award/award_category/nominees./award/award_nomination/nominated_for	/m/07s846j	1
/m/03ftmg	/sports/sports_team/roster./american_football/football_roster_position/position	/m/0g_g2	0
/m/05bpg3	/people/person/profession	/m/02hrh1q	1
/m/019r_1	/sports/sports_team/roster./basketball/basketball_roster_position/position	/m/0674hk	0
/m/01vvyd8	/people/person/religion	/m/051kv	1
/m/07lx1s	/film/film/film_art_direction_by	/m/089z0z	0
/m/01pj7	/location/location/contains	/m/0fhzy	1
/m/06br8	/location/statistical_region/religions./location/religion_percentage/religion	/m/02gr81	0
/m/09q5w2	/award/award_winning_work/awards_won./award/award_honor/award	/m/099c8n	1
/m/06wzvr	/award/award_nominee/award_nominations./award/award_nomination/nominated_for	/m/06wzvr	0
/m/06n7h7	/award/award_nominee/award_nominations./award/award_nomination/award_nominee	/m/06jvj7	1
/m/07_fl	/award/award_ceremony/awards_presented./award/award_honor/award_winner	/m/0mwm6	0
/m/02qwg	/award/award_nominee/award_nominations./award/award_nomination/award	/m/01ck6v	1
/m/03cf9ly	/tv/tv_personality/tv_regular_appearances./tv/tv_regular_personal_appearance/program	/m/0dx8gj	0
/m/0g1rw	/film/film_distributor/films_distributed./film/film_film_distributor_relationship/film	/m/016fyc	1
/m/02k13d	/business/business_operation/industry	/m/04q42	0
/m/08pc1x	/award/award_ceremony/awards_presented./award/award_honor/award_winner	/m/01nkxvx	1
/m/02404v	/music/artist/contribution./music/recording_contribution/performance_role	/m/09fqgj	0
/m/02xv8m	/people/person/place_of_birth	/m/0843m	1
/m/047vp1n	/location/statistical_region/places_exported_to./location/imports_and_exports/exported_to	/m/0bmpm	0
/m/01mqh5	/film/actor/film./film/performance/film	/m/0n6ds	1
/m/057d89	/award/award_winning_work/awards_won./award/award_honor/award	/m/019r_1	0
/m/070w7s	/award/award_nominee/award_nominations./award/award_nomination/award_nominee	/m/026n998	1
/m/0htww	/music/instrument/instrumentalists	/m/01c83m	0
/m/04fjzv	/film/film/release_date_s./film/film_regional_release_date/film_release_region	/m/05r4w	1
/m/01wk7ql	/location/location/partially_contains	/m/05c74	0
/m/04rs03	/people/person/profession	/m/02hrh1q	1
/m/02lk95	/education/field_of_study/students_majoring./education/education/student	/m/0bs5vty	0
/m/09gkx35	/film/film/film_festivals	/m/0fpkxfd	1
/m/089z0z	/celebrities/celebrity/celebrity_friends./celebrities/friendship/friend	/m/05ry0p	0
/m/0fkvn	/government/government_office_category/officeholders./government/government_position_held/jurisdiction_of_office	/m/018jmn	1
/m/0152cw	/award/award_winning_work/awards_won./award/award_honor/honored_for	/m/0k0sb	0
/m/012x2b	/film/actor/film./film/performance/film	/m/08phg9	1
/m/0ghvb	/base/saturdaynightlive/snl_cast_member/seasons./base/saturdaynightlive/snl_season_tenure/cast_members	/m/02lk95	0
/m/09d6p2	/business/job_title/people_with_this_title./business/employment_tenure/company	/m/08z129	1
/m/01fx4k	/tv/tv_producer/programs_produced./tv/tv_producer_term/program	/m/09qftb	0
/m/036jp8	/people/person/sibling_s./people/sibling_relationship/sibling	/m/02j4sk	1
/m/03xn3s2	/olympics/olympic_sport/athletes./olympics/olympic_athlete_affiliation/country	/m/02j4sk	0
/m/0f63n	/location/location/adjoin_s./location/adjoining_relationship/adjoins	/m/0fpn8	1
/m/0jtdp	/people/person/languages	/m/04ykg	0
/m/05ry0p	/people/person/profession	/m/02hrh1q	1
/m/01lj_c	/olympics/olympic_sport/athletes./olympics/olympic_athlete_affiliation/country	/m/013f9v	0
/m/0yc7f	/location/hud_county_place/county	/m/0cymp	1
/m/09v42sf	/people/ethnicity/people	/m/0bzlrh	0
/m/0l4vc	/base/biblioness/bibs_location/state	/m/05tbn	1
/m/03c_8t	/film/film/language	/m/02bwc7	0
/m/0d1_f	/government/politician/government_positions_held./government/government_position_held/jurisdiction_of_office	/m/0l3h	1
/m/01rly6	/food/food/nutrients./food/nutrition_fact/nutrient	/m/0vlf	0
/m/0159h6	/award/award_nominee/award_nominations./award/award_nomination/nominated_for	/m/0bm2nq	1
/m/03558l	/film/film/dubbing_performances./film/dubbing_performance/actor	/m/0kr7k	0
/m/03q5t	/music/performance_role/track_performances./music/track_contribution/role	/m/01vj9c	1
/m/04n52p6	/sports/sports_team/roster./american_football/football_roster_position/position	/m/03jl0_	0
/m/01243b	/music/genre/artists	/m/01s560x	1
/m/02dbn2	/film/actor/film./film/performance/film	/m/05ry0p	0
/m/017j69	/education/educational_institution/students_graduates./education/education/student	/m/074tb5	1
/m/0bp_7	/film/film/other_crew./film/film_crew_gig/crewmember	/m/035bcl	0
/m/0p_2r	/award/award_nominee/award_nominations./award/award_nomination/award	/m/0fc9js	1
/m/0lbj1	/dataworld/gardening_hint/split_to	/m/0jqp3	0
/m/047g8h	/sports/sports_position/players./sports/sports_team_roster/team	/m/025_64l	1
/m/0294zg	/tv/non_character_role/tv_regular_personal_appearances./tv/tv_regular_personal_appearance/person	/m/03q0r1	0
/m/0pyg6	/award/award_nominee/award_nominations./award/award_nomination/award_nominee	/m/03_2td	1
/m/01bm_	/tv/tv_personality/tv_regular_appearances./tv/tv_regular_personal_appearance/program	/m/019n9w	0
/m/016k62	/award/award_nominee/award_nominations./award/award_nomination/award_nominee	/m/03_0p	1
/m/0j862	/film/film/prequel	/m/02mg7n	0
/m/04q01mn	/film/film/genre	/m/0219x_	1
/m/0gsy3b	/people/person/places_lived./people/place_lived/location	/m/02g40r	0
/m/01gkg3	/education/educational_degree/people_with_this_degree./education/education/major_field_of_study	/m/0w7c	1
/m/0mm1q	/tv/tv_program/program_creator	/m/0mm1q	0
/m/01pgzn_	/people/person/place_of_birth	/m/02_286	1
/m/0262yt	/base/popstra/celebrity/canoodled./base/popstra/canoodled/participant	/m/02ptzz0	0
/m/065b6q	/people/ethnicity/people	/m/016h4r	1
/m/0g0rp	/sports/sports_team/sport	/m/01wz01	0
/m/01pj5q	/award/award_nominee/award_nominations./award/award_nomination/award	/m/02x73k6	1
/m/0hh2s	/people/person/gender	/m/0263ycg	0
/m/02sb1w	/award/award_winner/awards_won./award/award_honor/award_winner	/m/040981l	1
/m/0267wwv	/business/job_title/people_with_this_title./business/employment_tenure/company	/m/0n4z2	0
/m/07c0j	/influence/influence_node/influenced_by	/m/02jq1	1
/m/013807	/people/ethnicity/people	/m/02lg9w	0
/m/07ss8_	/award/award_nominee/award_nominations./award/award_nomination/award_nominee	/m/01wgxtl	1
/m/01wqpnm	/military/military_conflict/combatants./military/military_combatant_group/combatants	/m/01l7cxq	0
/m/0k_kr	/music/record_label/artist	/m/048xh	1
/m/04lhc4	/sports/sports_team/roster./baseball/baseball_roster_position/position	/m/07yklv	0
/m/05_wyz	/business/job_title/people_with_this_title./business/employment_tenure/company	/m/019rl6	1
/m/016z2j	/music/genre/artists	/m/06pwf6	0
/m/07sc6nw	/film/film/other_crew./film/film_crew_gig/film_crew_role	/m/09zzb8	1
/m/09rvcvl	/location/capital_of_administrative_division/capital_of./location/administrative_division_capital_relationship/administrative_division	/m/01zq91	0
/m/07ss8_	/award/award_nominee/award_nominations./award/award_nomination/award	/m/063y_ky	1
/m/02r6mf	/music/artist/track_contributions./music/track_contribution/role	/m/04q42	0
/m/085h1	/user/ktrueman/default_domain/international_organization/member_states	/m/019rg5	1
/m/07jmnh	/olympics/olympic_games/participating_countries	/m/01fsz	0
/m/0l12d	/people/person/profession	/m/02hrh1q	1
/m/028_yv	/sports/sports_league_draft/picks./sports/sports_league_draft_pick/school	/m/015w9s	0
/m/0dp7wt	/film/film/story_by	/m/03hnd	1
/m/03558l	/base/localfood/seasonal_month/produce_available./base/localfood/produce_availability/seasonal_months	/m/02vqsll	0
/m/02184q	/people/person/profession	/m/02hrh1q	1
/m/09rvwmy	/base/schemastaging/organization_extra/phone_number./base/schemastaging/phone_sandbox/contact_category	/m/01fwzk	0
/m/0nvt9	/location/location/adjoin_s./location/adjoining_relationship/adjoins	/m/0nvd8	1
/m/01htzx	/film/film/release_date_s./film/film_regional_release_date/film_regional_debut_venue	/m/070mff	0
/m/0jz9f	/film/film_distributor/films_distributed./film/film_film_distributor_relationship/film	/m/083shs	1
/m/085h1	/film/film/other_crew./film/film_crew_gig/film_crew_role	/m/0qtz9	0
/m/0cxn2	/food/food/nutrients./food/nutrition_fact/nutrient	/m/09gwd	1
/m/01wgx4	/film/film/film_festivals	/m/018cqq	0
/m/06w99h3	/film/film/genre	/m/02kdv5l	1
/m/04ftdq	/award/award_ceremony/awards_presented./award/award_honor/honored_for	/m/011yth	0
/m/025mb_	/people/person/gender	/m/02zsn	1
/m/0h7jp	/olympics/olympic_sport/athletes./olympics/olympic_athlete_affiliation/olympics	/m/02_jjm	0
/m/02pt6k_	/award/award_nominee/award_nominations./award/award_nomination/award_nominee	/m/06jvj7	1
/m/0f1nl	/media_common/netflix_genre/titles	/m/0209xj	0
/m/07h1q	/user/alexander/philosophy/philosopher/interests	/m/0x0w	1
/m/01w272y	/film/film/cinematography	/m/034b6k	0
/m/02x3lt7	/film/film/genre	/m/02b5_l	1
/m/04xn2m	/sports/sports_team/roster./american_football/football_roster_position/position	/m/0s6g4	0
/m/041jlr	/influence/influence_node/influenced_by	/m/07h1q	1
/m/02r6mf	/tv/non_character_role/tv_regular_personal_appearances./tv/tv_regular_personal_appearance/person	/m/01p8r8	0
/m/023gxx	/film/film/genre	/m/017fp	1
/m/07nvmx	/people/ethnicity/languages_spoken	/m/05xjb	0
/m/023s8	/people/person/places_lived./people/place_lived/location	/m/04ykg	1
/m/07z6xs	/award/award_winning_work/awards_won./award/award_honor/award_winner	/m/020hh3	0
/m/02d49z	/film/film/language	/m/05zjd	1
/m/0gdh5	/award/award_nominee/award_nominations./award/award_nomination/nominated_for	/m/02v49c	0
/m/02x8m	/music/genre/artists	/m/015x1f	1
/m/01bm_	/education/educational_institution/colors	/m/04q01mn	0
/m/0ct5zc	/film/film/release_date_s./film/film_regional_release_date/film_release_region	/m/05r4w	1
/m/0xddr	/location/administrative_division/country	/m/01wkmgb	0
/m/02py8_w	/sports/sports_team/sport	/m/039yzs	1
/m/0180mw	/olympics/olympic_sport/athletes./olympics/olympic_athlete_affiliation/country	/m/09rvwmy	0
/m/027dtv3	/award/award_nominee/award_nominations./award/award_nomination/award_nominee	/m/03w1v2	1
/m/0flj39	/location/location/time_zones	/m/0148nj	0
/m/01gtcc	/government/legislative_session/members./government/government_position_held/legislative_sessions	/m/01gtc0	1
/m/0gyfp9c	/medicine/symptom/symptom_of	/m/05sbv3	0
/m/03d1y3	/people/person/profession	/m/02jknp	1
/m/0ll3	/education/educational_institution/students_graduates./education/education/major_field_of_study	/m/0vm4s	0
/m/01vyv9	/people/person/place_of_birth	/m/0f2s6	1
/m/01x1cn2	/film/film_distributor/films_distributed./film/film_film_distributor_relationship/film	/m/0gbbt	0
/m/0gsg7	/tv/tv_network/programs./tv/tv_network_duration/program	/m/030k94	1
/m/049m_l	/music/group_member/membership./music/group_membership/group	/m/031t2d	0
/m/0bscw	/film/film/produced_by	/m/0d_skg	1
/m/033srr	/film/film/featured_film_locations	/m/0c0yh4	0
/m/07qht4	/media_common/netflix_genre/titles	/m/02wyzmv	1
/m/030wkp	/education/educational_degree/people_with_this_degree./education/education/institution	/m/0mm1q	0
/m/01f8gz	/film/film/runtime./film/film_cut/film_release_region	/m/03h64	1
/m/0486tv	/film/actor/film./film/performance/film	/m/07yklv	0
/m/01wyz92	/base/popstra/celebrity/friendship./base/popstra/friendship/participant	/m/01vz0g4	1
/m/0bm2nq	/sports/sports_team_location/teams	/m/069b85	0
/m/01m24m	/location/hud_county_place/county	/m/0m2j5	1
/m/017lb_	/sports/sports_team/colors	/m/06r2h	0
/m/0c3p7	/award/award_nominee/award_nominations./award/award_nomination/award_nominee	/m/01kp66	1
/m/0gvbw	/base/schemastaging/organization_extra/phone_number./base/schemastaging/phone_sandbox/service_location	/m/0fy34l	0
/m/043cl9	/people/person/profession	/m/02hrh1q	1
/m/0bh8x1y	/base/saturdaynightlive/snl_cast_member/seasons./base/saturdaynightlive/snl_season_tenure/cast_members	/m/0l14v3	0
/m/023rwm	/music/record_label/artist	/m/01dpts	1
/m/01mh8zn	/film/film/personal_appearances./film/personal_film_appearance/person	/m/02d9k	0
/m/08p1gp	/people/person/gender	/m/02zsn	1
/m/09b0xs	/celebrities/celebrity/celebrity_friends./celebrities/friendship/friend	/m/012x4t	0
/m/0c408_	/award/award_nominee/award_nominations./award/award_nomination/award_nominee	/m/03bx_5q	1
/m/0mn6	/sports/sports_league_draft/picks./sports/sports_league_draft_pick/school	/m/023nlj	0
/m/0h1p	/people/person/nationality	/m/06f32	1
/m/02g_6x	/business/business_operation/industry	/m/0n048	0
/m/0dzf_	/celebrities/celebrity/celebrity_friends./celebrities/friendship/friend	/m/0jrny	1
/m/01ld4n	/time/event/locations	/m/06s26c	0
/m/0ddbjy4	/film/film/other_crew./film/film_crew_gig/film_crew_role	/m/02rh1dz	1
/m/02rlj20	/government/legislative_session/members./government/government_position_held/district_represented	/m/07g2v	0
/m/01kb2j	/award/award_nominee/award_nominations./award/award_nomination/award_nominee	/m/017149	1
/m/0161jj	/film/film/prequel	/m/04rjg	0
/m/01lct6	/award/award_nominee/award_nominations./award/award_nomination/nominated_for	/m/039cq4	1
/m/05rrw9	/organization/role/leaders./organization/leadership/organization	/m/0161jj	0
/m/0ymff	/education/educational_institution/students_graduates./education/education/major_field_of_study	/m/04rjg	1
/m/01wgfp6	/film/film/language	/m/0263ycg	0
/m/01t07j	/people/person/profession	/m/02jknp	1
/m/09hrc	/people/ethnicity/people	/m/033fqh	0
/m/03_wvl	/award/award_nominee/award_nominations./award/award_nomination/award_nominee	/m/01sl1q	1
/m/01nczg	/education/educational_institution/colors	/m/067jsf	0
/m/01_d4	/location/location/adjoin_s./location/adjoining_relationship/adjoins	/m/04kcn	1
/m/03bw6	/organization/role/leaders./organization/leadership/organization	/m/01g03q	0
/m/0c6g29	/people/deceased_person/place_of_death	/m/0r62v	1
/m/03g62	/people/deceased_person/place_of_death	/m/051_y	0
/m/0dwt5	/music/performance_role/regular_performances./music/group_membership/group	/m/0b_xm	1
/m/02_340	/people/person/gender	/m/0cm89v	0
/m/0cjsxp	/award/award_nominee/award_nominations./award/award_nomination/award_nominee	/m/02sb1w	1
/m/09txzv	/location/country/capital	/m/01kk32	0
/m/099c8n	/award/award_category/nominees./award/award_nomination/nominated_for	/m/0ds3t5x	1
/m/0bv7t	/business/business_operation/industry	/m/0bv7t	0
/m/01w03jv	/people/person/places_lived./people/place_lived/location	/m/0ncj8	1
/m/0879xc	/celebrities/celebrity/sexual_relationships./celebrities/romantic_relationship/celebrity	/m/017fp	0
/m/04gvt5	/people/person/places_lived./people/place_lived/location	/m/02_286	1
/m/0mn6	/influence/influence_node/influenced_by	/m/0bs5vty	0
/m/026rm_y	/award/award_nominee/award_nominations./award/award_nomination/award	/m/057xs89	1
/m/03d0ns	/award/award_winner/awards_won./award/award_honor/award_winner	/m/0f1nl	0
/m/0hfjk	/media_common/netflix_genre/titles	/m/0n08r	1
/m/0htww	/location/country/form_of_government	/m/02mpyh	0
/m/0d810y	/award/award_nominee/award_nominations./award/award_nomination/nominated_for	/m/02rzdcp	1
/m/013nky	/people/person/employment_history./business/employment_tenure/company	/m/07q1m	0
/m/03j90	/people/person/place_of_birth	/m/05mwx	1
/m/0qdyf	/film/film_distributor/films_distributed./film/film_film_distributor_relationship/film	/m/05q9g1	0
/m/0kq08	/location/location/time_zones	/m/02lcqs	1
/m/03hvk2	/government/legislative_session/members./government/government_position_held/legislative_sessions	/m/04gm78f	0
/m/074tb5	/people/person/profession	/m/02hrh1q	1
/m/0486tv	/people/person/places_lived./people/place_lived/location	/m/05ry0p	0
/m/0209xj	/award/award_winning_work/awards_won./award/award_honor/award	/m/02x4w6g	1
/m/04n32	/government/political_party/politicians_in_this_party./government/political_party_tenure/politician	/m/0zdkh	0
/m/01ycbq	/film/actor/film./film/performance/film	/m/011yth	1
/m/0flj39	/sports/sports_team/roster./baseball/baseball_roster_position/position	/m/03cf9ly	0
/m/059gkk	/award/award_winner/awards_won./award/award_honor/award_winner	/m/02lg9w	1
/m/08pc1x	/education/educational_institution/students_graduates./education/education/student	/m/051_y	0
/m/051q5	/american_football/football_team/current_roster./sports/sports_team_roster/position	/m/047g8h	1
/m/02x4wr9	/film/film/edited_by	/m/018h2	0
/m/01f6zc	/film/actor/film./film/performance/film	/m/09sr0	1
/m/03hvk2	/user/alexander/philosophy/philosopher/interests	/m/01wkmgb	0
/m/07tk7	/education/educational_institution/students_graduates./education/education/major_field_of_study	/m/04rjg	1
/m/04ftdq	/user/alexander/philosophy/philosopher/interests	/m/0lwyk	0
/m/053ksp	/people/person/profession	/m/02hrh1q	1
/m/05rrw9	/people/person/gender	/m/023nlj	0
/m/03wbqc4	/film/film/other_crew./film/film_crew_gig/film_crew_role	/m/09zzb8	1
/m/0n3g	/film/film/release_date_s./film/film_regional_release_date/film_release_region	/m/01s21dg	0
/m/018wdw	/award/award_category/nominees./award/award_nomination/nominated_for	/m/02kfzz	1
/m/03lpd0	/influence/influence_node/peers./influence/peer_relationship/peers	/m/01fx4k	0
/m/043vc	/sports/sports_team/roster./american_football/football_roster_position/position	/m/02g_6x	1
/m/0gbbt	/tv/tv_personality/tv_regular_appearances./tv/tv_regular_personal_appearance/program	/m/02rlj20	0
/m/05bt6j	/music/genre/artists	/m/027kwc	1
/m/04t7ts	/sports/professional_sports_team/draft_picks./sports/sports_league_draft_pick/school	/m/01wyz92	0
/m/02x8m	/music/genre/artists	/m/024qwq	1
/m/016kjs	/location/location/partially_contains	/m/047g8h	0
/m/02822	/education/field_of_study/students_majoring./education/education/student	/m/012x2b	1
/m/016tbr	/people/person/languages	/m/0cvkv5	0
/m/0d1_f	/government/politician/government_positions_held./government/government_position_held/jurisdiction_of_office	/m/07fsv	1
/m/0l14v3	/music/record_label/artist	/m/08pth9	0
/m/01h5f8	/people/person/profession	/m/018gz8	1
/m/03558l	/business/job_title/people_with_this_title./business/employment_tenure/company	/m/01lxw6	0
/m/0f1vrl	/people/person/places_lived./people/place_lived/location	/m/0f2s6	1
/m/02rwmk	/government/legislative_session/members./government/government_position_held/district_represented	/m/0mb0	0
/m/09hd6f	/award/award_winner/awards_won./award/award_honor/award_winner	/m/06jrhz	1
/m/0htww	/film/film/personal_appearances./film/personal_film_appearance/person	/m/043q4d	0
/m/01gbn6	/award/award_nominee/award_nominations./award/award_nomination/nominated_for	/m/0bcp9b	1
/m/0fztbq	/location/administrative_division/country	/m/09hz7t	0
/m/053vcrp	/film/film_set_designer/film_sets_designed	/m/04v8x9	1
/m/0qyzb	/education/educational_institution/students_graduates./education/education/major_field_of_study	/m/016tbr	0
/m/01vwllw	/film/actor/film./film/performance/film	/m/06cgf	1
/m/01s7pm	/tv/tv_network/programs./tv/tv_network_duration/program	/m/088n7	0
/m/016gr2	/award/award_nominee/award_nominations./award/award_nomination/award_nominee	/m/02tr7d	1
/m/03ftmg	/dataworld/gardening_hint/split_to	/m/043tvp3	0
/m/024rgt	/award/award_nominee/award_nominations./award/award_nomination/nominated_for	/m/0dp7wt	1
/m/027l4q	/music/instrument/instrumentalists	/m/088n7	0
/m/03t22m	/music/performance_role/guest_performances./music/recording_contribution/performance_role	/m/01wy6	1
/m/01bm_	/location/location/adjoin_s./location/adjoining_relationship/adjoins	/m/0x0w	0
/m/02qwg	/award/award_nominee/award_nominations./award/award_nomination/award_nominee	/m/03j24kf	1
/m/0k_l4	/user/ktrueman/default_domain/international_organization/member_states	/m/02tn0_	0
/m/016clz	/music/genre/artists	/m/06br6t	1
/m/0vlf	/location/country/form_of_government	/m/0fg04	0
/m/061zc_	/people/person/places_lived./people/place_lived/location	/m/029kpy	1
/m/051_y	/award/award_nominee/award_nominations./award/award_nomination/award	/m/0k3gw	0
/m/04954	/award/award_nominee/award_nominations./award/award_nomination/award	/m/0cqh46	1
/m/01s21dg	/education/educational_degree/people_with_this_degree./education/education/major_field_of_study	/m/03pm9	0
/m/06q8hf	/people/person/employment_history./business/employment_tenure/company	/m/0jz9f	1
/m/0qy5v	/location/country/form_of_government	/m/05ry0p	0
/m/057xs89	/award/award_category/winners./award/award_honor/award_winner	/m/0lx2l	1
/m/0cbgl	/location/country/form_of_government	/m/016kjs	0
/m/0337vz	/people/person/place_of_birth	/m/01_d4	1
/m/01vsy7t	/language/human_language/countries_spoken_in	/m/0c1fs	0
/m/05l2z4	/government/legislative_session/members./government/government_position_held/legislative_sessions	/m/02bn_p	1
/m/018t8f	/award/award_winning_work/awards_won./award/award_honor/award	/m/02b171	0
/m/04bd8y	/film/actor/film./film/performance/film	/m/09rvwmy	1
/m/01vsy95	/celebrities/celebrity/sexual_relationships./celebrities/romantic_relationship/celebrity	/m/02h2z_	0
/m/05bt6j	/music/genre/artists	/m/02jq1	1
/m/0fpn8	/user/alexander/philosophy/philosopher/interests	/m/07lx1s	0
/m/03v0t	/location/location/contains	/m/0sf9_	1
/m/01x72k	/celebrities/celebrity/sexual_relationships./celebrities/romantic_relationship/celebrity	/m/03hvk2	0
/m/01vrt_c	/award/award_winner/awards_won./award/award_honor/award_winner	/m/0qdyf	1
/m/03q64h	/medicine/disease/notable_people_with_this_condition	/m/05j0wc	0
/m/03_3d	/location/location/contains	/m/018jkl	1
/m/05vtw	/government/legislative_session/members./government/government_position_held/legislative_sessions	/m/03sxd2	0
/m/027y151	/award/award_nominee/award_nominations./award/award_nomination/award	/m/02r22gf	1
/m/01wgfp6	/olympics/olympic_participating_country/medals_won./olympics/olympic_medal_honor/olympics	/m/092c5f	0
/m/0glt670	/music/genre/artists	/m/01wcp_g	1
/m/018cqq	/base/biblioness/bibs_location/state	/m/01yb09	0
/m/0bxtg	/award/award_nominee/award_nominations./award/award_nomination/award_nominee	/m/0c4f4	1
/m/0161jj	/user/alexander/philosophy/philosopher/interests	/m/01htzx	0
/m/0n6f8	/film/actor/film./film/performance/film	/m/03z20c	1
/m/078jnn	/award/award_nominee/award_nominations./award/award_nomination/award_nominee	/m/03qkcn9	0
/m/04f6hhm	/tv/tv_program/genre	/m/01htzx	1
/m/012x4t	/education/educational_degree/people_with_this_degree./education/education/institution	/m/01lk02	0
/m/03rl1g	/government/legislative_session/members./government/government_position_held/district_represented	/m/03s0w	1
/m/02mpyh	/education/educational_institution/colors	/m/05g2v	0
/m/02xry	/location/location/contains	/m/0fxkr	1
/m/02phtzk	/media_common/netflix_genre/titles	/m/04fkg4	0
/m/05bnp0	/award/award_nominee/award_nominations./award/award_nomination/award	/m/0cqh46	1
/m/0h1_w	/base/aareas/schema/administrative_area/administrative_parent	/m/01v8y9	0
/m/02q7fl9	/film/film/production_companies	/m/01gb54	1
/m/01tsbmv	/award/award_nominated_work/award_nominations./award/award_nomination/nominated_for	/m/02v49c	0
/m/06ns98	/award/award_nominee/award_nominations./award/award_nomination/nominated_for	/m/0ddd0gc	1
/m/02qkk9_	/film/film/prequel	/m/02jqjm	0
/m/09pj68	/award/award_ceremony/awards_presented./award/award_honor/award_winner	/m/046m59	1
/m/05f4m9q	/people/person/languages	/m/0c5x_	0
/m/01jrp0	/people/person/gender	/m/02zsn	1
/m/0k7pf	/base/popstra/celebrity/breakup./base/popstra/breakup/participant	/m/06mq7	0
/m/0f7hc	/award/award_nominee/award_nominations./award/award_nomination/award	/m/05f4m9q	1
/m/02q7fl9	/people/ethnicity/geographic_distribution	/m/0257wh	0
/m/04lhc4	/award/award_winning_work/awards_won./award/award_honor/award	/m/02z1nbg	1
/m/01gssz	/people/ethnicity/languages_spoken	/m/05bpg3	0
/m/0gr42	/award/award_category/nominees./award/award_nomination/nominated_for	/m/09q5w2	1
/m/05l2z4	/language/human_language/countries_spoken_in	/m/03_x5t	0
/m/0dk0dj	/tv/tv_program/program_creator	/m/03jl0_	1
/m/033x5p	/people/deceased_person/place_of_burial	/m/030w19	0
/m/07c6l	/music/instrument/instrumentalists	/m/0146pg	1
/m/09x3r	/music/artist/origin	/m/0dlv0	0
