# Supplementary material
Source: ML conference proceedings conference paper supplement (https://proceedings.neurips.cc/paper_files/paper/2021/hash/0fd600c953cde8121262e322ef09f70e-Abstract.html)
Supplement: Supplementary file 1 [file 0fd600c953cde8121262e322ef09f70e-Supplemental.zip › Supplementary_Material_Paper_8745/data/GraIL-BM_fb237_v3/train/train.txt]

/m/0h7x	/location/location/contains	/m/0133h8
/m/02kk_c	/award/award_winning_work/awards_won./award/award_honor/award_winner	/m/044zvm
/m/031n8c	/organization/endowed_organization/endowment./measurement_unit/dated_money_value/currency	/m/09nqf
/m/03jht	/people/person/profession	/m/05z96
/m/025vry	/people/person/gender	/m/05zppz
/m/025m8y	/award/award_category/category_of	/m/0c4ys
/m/03_6y	/award/award_nominee/award_nominations./award/award_nomination/award_nominee	/m/016vg8
/m/015dnt	/people/person/gender	/m/05zppz
/m/05bnq3j	/people/person/gender	/m/05zppz
/m/03v3xp	/award/award_winner/awards_won./award/award_honor/award_winner	/m/0755wz
/m/0gs96	/award/award_category/winners./award/award_honor/ceremony	/m/0c6vcj
/m/0gvx_	/award/award_category/nominees./award/award_nomination/nominated_for	/m/06929s
/m/0jt5zcn	/location/location/contains	/m/0ym4t
/m/05x2t7	/people/person/gender	/m/05zppz
/m/0343h	/people/person/languages	/m/02h40lc
/m/07tgn	/education/educational_institution/students_graduates./education/education/major_field_of_study	/m/088tb
/m/02qyntr	/award/award_category/nominees./award/award_nomination/nominated_for	/m/016ks5
/m/0bkj86	/education/educational_degree/people_with_this_degree./education/education/institution	/m/01p79b
/m/031k24	/award/award_nominee/award_nominations./award/award_nomination/award_nominee	/m/03jldb
/m/029ghl	/people/person/spouse_s./people/marriage/spouse	/m/03xpsrx
/m/05qtj	/location/location/contains	/m/04gdr
/m/014z8v	/people/person/gender	/m/05zppz
/m/01pcvn	/base/popstra/celebrity/friendship./base/popstra/friendship/participant	/m/01r93l
/m/04dqdk	/people/person/profession	/m/016z4k
/m/0fqt1ns	/film/film/other_crew./film/film_crew_gig/film_crew_role	/m/089fss
/m/01_x6v	/award/award_nominee/award_nominations./award/award_nomination/award	/m/0gqz2
/m/0fthdk	/award/award_nominee/award_nominations./award/award_nomination/award_nominee	/m/0g8st4
/m/02wgk1	/film/film/film_format	/m/07fb8_
/m/01kymm	/people/person/profession	/m/016z4k
/m/03xgm3	/celebrities/celebrity/sexual_relationships./celebrities/romantic_relationship/celebrity	/m/01w_10
/m/0789_m	/award/award_category/winners./award/award_honor/award_winner	/m/034q3l
/m/014z8v	/people/person/profession	/m/0dxtg
/m/0262zm	/award/award_category/winners./award/award_honor/award_winner	/m/03772
/m/0bynt	/olympics/olympic_sport/athletes./olympics/olympic_athlete_affiliation/country	/m/01z88t
/m/032_wv	/award/award_winning_work/awards_won./award/award_honor/award_winner	/m/05m883
/m/0gs96	/award/award_category/winners./award/award_honor/ceremony	/m/0bzm__
/m/0ccck7	/award/award_winning_work/awards_won./award/award_honor/award_winner	/m/0k9j_
/m/0f2v0	/base/popstra/location/vacationers./base/popstra/vacation_choice/vacationer	/m/01pfkw
/m/042zrm	/film/film/release_date_s./film/film_regional_release_date/film_release_region	/m/0d0vqn
/m/023r2x	/music/performance_role/guest_performances./music/recording_contribution/performance_role	/m/03qlv7
/m/0gbwp	/award/award_nominee/award_nominations./award/award_nomination/award	/m/02v1m7
/m/0j5b8	/people/person/nationality	/m/0f8l9c
/m/0jmgb	/sports/sports_team/roster./basketball/basketball_roster_position/position	/m/0355dz
/m/089tm	/award/award_nominee/award_nominations./award/award_nomination/award	/m/02f716
/m/01wk7b7	/base/popstra/celebrity/friendship./base/popstra/friendship/participant	/m/0sx5w
/m/01wg6y	/people/person/profession	/m/01c72t
/m/01f2f8	/people/person/places_lived./people/place_lived/location	/m/06c62
/m/036hf4	/award/award_nominee/award_nominations./award/award_nomination/award_nominee	/m/057176
/m/015fr	/location/statistical_region/gdp_nominal_per_capita./measurement_unit/dated_money_value/currency	/m/09nqf
/m/01fxck	/people/person/profession	/m/0dxtg
/m/01kwlwp	/people/person/spouse_s./people/marriage/type_of_union	/m/04ztj
/m/02ylg6	/film/film/other_crew./film/film_crew_gig/film_crew_role	/m/0215hd
/m/05k7sb	/location/location/adjoin_s./location/adjoining_relationship/adjoins	/m/059f4
/m/025hzx	/award/award_nominee/award_nominations./award/award_nomination/award_nominee	/m/07rd7
/m/0dbpyd	/award/award_nominee/award_nominations./award/award_nomination/award_nominee	/m/0488g9
/m/01pcj4	/organization/endowed_organization/endowment./measurement_unit/dated_money_value/currency	/m/09nqf
/m/03ydry	/people/person/place_of_birth	/m/07dfk
/m/0f5xn	/award/award_nominee/award_nominations./award/award_nomination/award	/m/09sdmz
/m/0265v21	/people/person/gender	/m/05zppz
/m/015t56	/award/award_nominee/award_nominations./award/award_nomination/award_nominee	/m/016vg8
/m/09ntbc	/soccer/football_player/current_team./sports/sports_team_roster/team	/m/03_44z
/m/0jt3qpk	/award/award_ceremony/awards_presented./award/award_honor/award_winner	/m/025vl4m
/m/03h26tm	/award/award_winner/awards_won./award/award_honor/award_winner	/m/09pjnd
/m/06qd3	/location/location/contains	/m/01vsb_
/m/03176f	/award/award_nominated_work/award_nominations./award/award_nomination/nominated_for	/m/031786
/m/0b7xl8	/award/award_winner/awards_won./award/award_honor/award_winner	/m/04cw0j
/m/09cm54	/award/award_category/winners./award/award_honor/award_winner	/m/02y_2y
/m/01cszh	/music/record_label/artist	/m/02h9_l
/m/02qm5j	/music/genre/artists	/m/04bgy
/m/079vf	/film/actor/film./film/performance/film	/m/0dnkmq
/m/045j3w	/film/film/release_date_s./film/film_regional_release_date/film_release_region	/m/0b90_r
/m/04q7r	/music/performance_role/regular_performances./music/group_membership/role	/m/0mkg
/m/0c5dd	/film/film/language	/m/02h40lc
/m/045zr	/music/artist/track_contributions./music/track_contribution/role	/m/01vdm0
/m/03nsm5x	/film/film/release_date_s./film/film_regional_release_date/film_release_region	/m/05qhw
/m/02g9p4	/music/performance_role/track_performances./music/track_contribution/role	/m/05842k
/m/05fnl9	/award/award_winner/awards_won./award/award_honor/award_winner	/m/01y9xg
/m/01242_	/film/film/other_crew./film/film_crew_gig/film_crew_role	/m/01pvkk
/m/0gvx_	/award/award_category/winners./award/award_honor/ceremony	/m/0dth6b
/m/05bnq3j	/people/person/profession	/m/0dxtg
/m/01jswq	/education/educational_institution/students_graduates./education/education/major_field_of_study	/m/0g26h
/m/0gy6z9	/award/award_nominee/award_nominations./award/award_nomination/award_nominee	/m/02qgqt
/m/0kbf1	/film/film/release_date_s./film/film_regional_release_date/film_release_region	/m/0154j
/m/0jwl2	/tv/tv_program/genre	/m/0pr6f
/m/049nq	/location/location/contains	/m/07371
/m/07brj	/music/performance_role/track_performances./music/track_contribution/role	/m/0l14j_
/m/03818y	/organization/organization/headquarters./location/mailing_address/citytown	/m/013yq
/m/01w9wwg	/award/award_nominee/award_nominations./award/award_nomination/award	/m/01bgqh
/m/0bdjd	/film/film/music	/m/02jxkw
/m/06182p	/organization/organization/headquarters./location/mailing_address/citytown	/m/030qb3t
/m/0dgrmp	/sports/sports_position/players./sports/sports_team_roster/team	/m/03x6xl
/m/077q8x	/film/film/genre	/m/07s9rl0
/m/02_xgp2	/education/educational_degree/people_with_this_degree./education/education/institution	/m/0885n
/m/051ysmf	/award/award_nominee/award_nominations./award/award_nomination/nominated_for	/m/0gl3hr
/m/02kxbwx	/award/award_nominee/award_nominations./award/award_nomination/award	/m/0f_nbyh
/m/04wgh	/location/location/adjoin_s./location/adjoining_relationship/adjoins	/m/0h3y
/m/02bgmr	/people/person/nationality	/m/0jgd
/m/09qwmm	/award/award_category/winners./award/award_honor/ceremony	/m/027hjff
/m/03bdkd	/film/film/genre	/m/03bxz7
/m/09pnw5	/award/award_ceremony/awards_presented./award/award_honor/award_winner	/m/040z9
/m/015v3r	/award/award_nominee/award_nominations./award/award_nomination/award	/m/0gr4k
/m/030_1m	/film/film_distributor/films_distributed./film/film_film_distributor_relationship/film	/m/0bby9p5
/m/0cc5tgk	/award/award_winner/awards_won./award/award_honor/award_winner	/m/0dzc16
/m/018ysx	/music/genre/parent_genre	/m/017371
/m/0241wg	/people/person/languages	/m/02h40lc
/m/05l8y	/location/statistical_region/gdp_real./measurement_unit/adjusted_money_value/adjustment_currency	/m/09nqf
/m/0qmd5	/film/film/estimated_budget./measurement_unit/dated_money_value/currency	/m/09nqf
/m/019bk0	/time/event/instance_of_recurring_event	/m/0c4ys
/m/0g9wdmc	/film/film/release_date_s./film/film_regional_release_date/film_release_region	/m/047yc
/m/0315q3	/film/actor/film./film/performance/film	/m/05sns6
/m/05k2s_	/award/award_winner/awards_won./award/award_honor/award_winner	/m/02l4pj
/m/02_xgp2	/education/educational_degree/people_with_this_degree./education/education/major_field_of_study	/m/03082
/m/01l9v7n	/award/award_nominee/award_nominations./award/award_nomination/nominated_for	/m/0sxgv
/m/0755wz	/award/award_nominee/award_nominations./award/award_nomination/award_nominee	/m/02l4pj
/m/03wj4r8	/film/film/other_crew./film/film_crew_gig/film_crew_role	/m/09vw2b7
/m/022kcs	/people/person/gender	/m/05zppz
/m/0ktpx	/film/film/genre	/m/07s9rl0
/m/02my3z	/award/award_nominee/award_nominations./award/award_nomination/award	/m/09sb52
/m/06929s	/film/film/personal_appearances./film/personal_film_appearance/person	/m/0157m
/m/05kms	/music/performance_role/track_performances./music/track_contribution/role	/m/023r2x
/m/011hq1	/base/aareas/schema/administrative_area/administrative_parent	/m/03rk0
/m/07cdz	/film/film/genre	/m/02l7c8
/m/01xhh5	/people/ethnicity/people	/m/02y9ln
/m/0x0d	/baseball/baseball_team/team_stats./baseball/baseball_team_stats/season	/m/0285r5d
/m/082brv	/music/group_member/membership./music/group_membership/role	/m/02sgy
/m/01kc4s	/soccer/football_team/current_roster./soccer/football_roster_position/position	/m/0dgrmp
/m/03l6q0	/film/film/language	/m/02h40lc
/m/01914	/base/aareas/schema/administrative_area/administrative_parent	/m/0d05w3
/m/06s7rd	/people/person/languages	/m/02h40lc
/m/02x258x	/award/award_category/nominees./award/award_nomination/nominated_for	/m/03qnc6q
/m/028qdb	/award/award_winner/awards_won./award/award_honor/award_winner	/m/04dqdk
/m/03gh4	/location/statistical_region/gdp_nominal./measurement_unit/dated_money_value/currency	/m/09nqf
/m/04wvhz	/award/award_nominee/award_nominations./award/award_nomination/award	/m/040njc
/m/027zz	/people/person/spouse_s./people/marriage/type_of_union	/m/04ztj
/m/05h5nb8	/award/award_category/winners./award/award_honor/award_winner	/m/054bt3
/m/07s9rl0	/media_common/netflix_genre/titles	/m/02wtp6
/m/087vz	/military/military_combatant/military_conflicts./military/military_combatant_group/combatants	/m/0f8l9c
/m/06zsk51	/tv/tv_program/regular_cast./tv/regular_tv_appearance/actor	/m/01kwsg
/m/019c57	/business/business_operation/assets./measurement_unit/dated_money_value/currency	/m/09nqf
/m/06b_0	/award/award_nominee/award_nominations./award/award_nomination/award	/m/04dn09n
/m/0hvvf	/film/film/language	/m/02h40lc
/m/03t5n3	/award/award_category/winners./award/award_honor/award_winner	/m/01vw20h
/m/09vzz	/education/educational_institution/students_graduates./education/education/student	/m/0tfc
/m/0jgx	/location/statistical_region/gdp_nominal_per_capita./measurement_unit/dated_money_value/currency	/m/09nqf
/m/06s7rd	/award/award_nominee/award_nominations./award/award_nomination/award	/m/01c92g
/m/0gkz15s	/film/film/other_crew./film/film_crew_gig/film_crew_role	/m/0ch6mp2
/m/0d1qmz	/award/award_nominated_work/award_nominations./award/award_nomination/nominated_for	/m/02n72k
/m/036gdw	/film/actor/dubbing_performances./film/dubbing_performance/language	/m/02h40lc
/m/02qkwl	/film/film/other_crew./film/film_crew_gig/film_crew_role	/m/09vw2b7
/m/02v60l	/people/person/profession	/m/0np9r
/m/026cmdc	/sports/sports_team/roster./american_football/football_roster_position/position	/m/04nfpk
/m/02_xgp2	/education/educational_degree/people_with_this_degree./education/education/institution	/m/01n_g9
/m/0487_	/sports/sports_team/roster./american_football/football_roster_position/position	/m/04nfpk
/m/02qx5h	/people/person/gender	/m/05zppz
/m/03t5n3	/award/award_category/winners./award/award_honor/ceremony	/m/02cg41
/m/05pdh86	/film/film/release_date_s./film/film_regional_release_date/film_release_region	/m/04hqz
/m/0889x	/people/person/gender	/m/05zppz
/m/02r5dz	/organization/organization/place_founded	/m/06kx2
/m/0l14md	/music/instrument/instrumentalists	/m/04f7c55
/m/01kwsg	/award/award_winner/awards_won./award/award_honor/award_winner	/m/01713c
/m/07nxnw	/film/film/other_crew./film/film_crew_gig/film_crew_role	/m/09vw2b7
/m/03nt7j	/sports/sports_league_draft/picks./sports/sports_league_draft_pick/school	/m/015fs3
/m/0jt90f5	/influence/influence_node/influenced_by	/m/041h0
/m/05yh_t	/award/award_nominee/award_nominations./award/award_nomination/award_nominee	/m/05vsxz
/m/04t9c0	/film/film/estimated_budget./measurement_unit/dated_money_value/currency	/m/09nqf
/m/02kxjx	/base/culturalevent/event/entity_involved	/m/01h3dj
/m/02l0xc	/people/person/profession	/m/08z956
/m/036hf4	/people/person/gender	/m/05zppz
/m/01qh7	/base/biblioness/bibs_location/state	/m/05k7sb
/m/047yc	/olympics/olympic_participating_country/athletes./olympics/olympic_athlete_affiliation/olympics	/m/06sks6
/m/05c26ss	/film/film/release_date_s./film/film_regional_release_date/film_release_region	/m/047yc
/m/044bn	/people/person/spouse_s./people/marriage/location_of_ceremony	/m/0k049
/m/0jtg0	/music/performance_role/track_performances./music/track_contribution/role	/m/07brj
/m/0jtg0	/music/instrument/instrumentalists	/m/01gg59
/m/03h3x5	/film/film/produced_by	/m/021yw7
/m/03_wj_	/people/person/spouse_s./people/marriage/type_of_union	/m/04ztj
/m/034fl9	/tv/tv_program/regular_cast./tv/regular_tv_appearance/actor	/m/039wsf
/m/01t8399	/people/person/gender	/m/05zppz
/m/0r6cx	/location/location/adjoin_s./location/adjoining_relationship/adjoins	/m/0r6ff
/m/023slg	/music/group_member/membership./music/group_membership/role	/m/0l14qv
/m/036jb	/people/person/gender	/m/05zppz
/m/02x02kb	/people/person/spouse_s./people/marriage/type_of_union	/m/04ztj
/m/01nn3m	/music/artist/track_contributions./music/track_contribution/role	/m/01vdm0
/m/0prjs	/award/award_nominee/award_nominations./award/award_nomination/award	/m/09sdmz
/m/01z88t	/location/statistical_region/gdp_nominal_per_capita./measurement_unit/dated_money_value/currency	/m/09nqf
/m/05q8pss	/award/award_category/nominees./award/award_nomination/nominated_for	/m/0140g4
/m/03176f	/film/film/estimated_budget./measurement_unit/dated_money_value/currency	/m/09nqf
/m/07cbs	/people/person/places_lived./people/place_lived/location	/m/0mp3l
/m/0184jw	/people/person/place_of_birth	/m/06kx2
/m/06x4c	/food/food/nutrients./food/nutrition_fact/nutrient	/m/025sf8g
/m/047fjjr	/film/film/release_date_s./film/film_regional_release_date/film_release_region	/m/0chghy
/m/02d6n_	/film/actor/film./film/performance/film	/m/084qpk
/m/01pfkw	/people/person/languages	/m/02h40lc
/m/0k4kk	/film/film/genre	/m/07s9rl0
/m/0l14j_	/music/performance_role/track_performances./music/track_contribution/role	/m/0192l
/m/070xg	/sports/professional_sports_team/draft_picks./sports/sports_league_draft_pick/draft	/m/03nt7j
/m/02x6dqb	/film/film/release_date_s./film/film_regional_release_date/film_release_region	/m/0chghy
/m/03c_pqj	/people/person/place_of_birth	/m/0fl2s
/m/047myg9	/film/film/other_crew./film/film_crew_gig/film_crew_role	/m/0215hd
/m/01hn_t	/tv/tv_program/regular_cast./tv/regular_tv_appearance/actor	/m/018p4y
/m/01sby_	/film/film/release_date_s./film/film_regional_release_date/film_release_region	/m/0chghy
/m/01vsksr	/music/group_member/membership./music/group_membership/role	/m/0l14md
/m/05th8t	/people/person/spouse_s./people/marriage/type_of_union	/m/04ztj
/m/03hp2y1	/film/film/language	/m/02h40lc
/m/0557q	/education/field_of_study/students_majoring./education/education/student	/m/0gps0z
/m/03c6vl	/people/person/spouse_s./people/marriage/type_of_union	/m/04ztj
/m/05dbyt	/film/actor/film./film/performance/film	/m/040_lv
/m/076psv	/film/film_set_designer/film_sets_designed	/m/0cq7tx
/m/01x209s	/people/person/spouse_s./people/marriage/type_of_union	/m/04ztj
/m/06bw5	/business/business_operation/operating_income./measurement_unit/dated_money_value/currency	/m/09nqf
/m/03b1sb	/award/award_winning_work/awards_won./award/award_honor/award	/m/02x4x18
/m/0dr_9t7	/film/film/genre	/m/05p553
/m/05x2t7	/award/award_nominee/award_nominations./award/award_nomination/award	/m/0gs96
/m/02xwq9	/people/person/gender	/m/05zppz
/m/0bkj86	/education/educational_degree/people_with_this_degree./education/education/institution	/m/01lhdt
/m/037njl	/education/university/domestic_tuition./measurement_unit/dated_money_value/currency	/m/09nqf
/m/031sg0	/people/person/spouse_s./people/marriage/type_of_union	/m/04ztj
/m/04jkpgv	/film/film/release_date_s./film/film_regional_release_date/film_release_region	/m/06qd3
/m/01c9dd	/award/award_category/winners./award/award_honor/award_winner	/m/05mt_q
/m/015t56	/award/award_nominee/award_nominations./award/award_nomination/award_nominee	/m/02ck7w
/m/0c1jh	/people/person/gender	/m/05zppz
/m/01vw20h	/award/award_nominee/award_nominations./award/award_nomination/award_nominee	/m/067nsm
/m/06cm5	/film/film/produced_by	/m/04t38b
/m/02gx2k	/award/award_category/winners./award/award_honor/ceremony	/m/013b2h
/m/0h3y	/location/location/adjoin_s./location/adjoining_relationship/adjoins	/m/04wgh
/m/02_xgp2	/education/educational_degree/people_with_this_degree./education/education/institution	/m/01jsk6
/m/07rzf	/people/person/languages	/m/02h40lc
/m/0k2cb	/film/film/genre	/m/04xvh5
/m/020ddc	/education/university/local_tuition./measurement_unit/dated_money_value/currency	/m/09nqf
/m/031k24	/award/award_nominee/award_nominations./award/award_nomination/award_nominee	/m/048lv
/m/01bgqh	/award/award_category/winners./award/award_honor/award_winner	/m/03d2k
/m/05mkhs	/award/award_nominee/award_nominations./award/award_nomination/award_nominee	/m/0315q3
/m/01p_2p	/music/genre/artists	/m/07z542
/m/05vsxz	/film/actor/film./film/performance/film	/m/0cz_ym
/m/06182p	/education/educational_institution/students_graduates./education/education/student	/m/017g2y
/m/035d1m	/olympics/olympic_sport/athletes./olympics/olympic_athlete_affiliation/country	/m/0chghy
/m/016nff	/film/actor/film./film/performance/film	/m/016mhd
/m/02kxbwx	/award/award_nominee/award_nominations./award/award_nomination/award	/m/040njc
/m/01dkpb	/people/deceased_person/place_of_death	/m/030qb3t
/m/0336mc	/award/award_nominee/award_nominations./award/award_nomination/award	/m/09sb52
/m/0l99s	/influence/influence_node/influenced_by	/m/02lt8
/m/05p09dd	/film/film/release_date_s./film/film_regional_release_date/film_release_region	/m/0jgd
/m/027pfg	/film/film/other_crew./film/film_crew_gig/film_crew_role	/m/0ch6mp2
/m/017jd9	/film/film/other_crew./film/film_crew_gig/film_crew_role	/m/09vw2b7
/m/01nfys	/award/award_winner/awards_won./award/award_honor/award_winner	/m/01z7_f
/m/03gvt	/music/instrument/instrumentalists	/m/04s5_s
/m/02x8n1n	/award/award_category/winners./award/award_honor/award_winner	/m/01l_yg
/m/02gs6r	/film/film/music	/m/02rgz4
/m/054krc	/award/award_category/nominees./award/award_nomination/nominated_for	/m/08rr3p
/m/0138mv	/soccer/football_team/current_roster./soccer/football_roster_position/position	/m/0dgrmp
/m/01hc9_	/influence/influence_node/influenced_by	/m/0jt90f5
/m/0qf3p	/people/person/gender	/m/05zppz
/m/01vs_v8	/award/award_nominee/award_nominations./award/award_nomination/award	/m/02f716
/m/0py8j	/base/culturalevent/event/entity_involved	/m/0j5b8
/m/04dn09n	/award/award_category/nominees./award/award_nomination/nominated_for	/m/051zy_b
/m/03rhqg	/music/record_label/artist	/m/0394y
/m/0bpm4yw	/film/film/estimated_budget./measurement_unit/dated_money_value/currency	/m/09nqf
/m/014mlp	/education/educational_degree/people_with_this_degree./education/education/institution	/m/01b1mj
/m/09p4w8	/film/film/language	/m/02h40lc
/m/06dv3	/award/award_nominee/award_nominations./award/award_nomination/award_nominee	/m/0184jc
/m/0160w	/base/aareas/schema/administrative_area/administrative_parent	/m/02j71
/m/0133sq	/people/person/profession	/m/0dxtg
/m/04ztj	/people/marriage_union_type/unions_of_this_type./people/marriage/location_of_ceremony	/m/013ksx
/m/0pk1p	/film/film/language	/m/02h40lc
/m/0b_fw	/people/person/nationality	/m/0b90_r
/m/025tlyv	/film/film_distributor/films_distributed./film/film_film_distributor_relationship/film	/m/042zrm
/m/0h32q	/celebrities/celebrity/sexual_relationships./celebrities/romantic_relationship/celebrity	/m/0143wl
/m/03j149k	/base/schemastaging/person_extra/net_worth./measurement_unit/dated_money_value/currency	/m/09nqf
/m/02pzz3p	/award/award_category/winners./award/award_honor/ceremony	/m/0jt3qpk
/m/0661ql3	/film/film/release_date_s./film/film_regional_release_date/film_release_region	/m/015fr
/m/02ts3h	/people/person/spouse_s./people/marriage/type_of_union	/m/04ztj
/m/09th87	/sports/sports_league_draft/picks./sports/sports_league_draft_pick/school	/m/0dzst
/m/0g0z58	/sports/sports_team/roster./american_football/football_historical_roster_position/position_s	/m/04nfpk
/m/0gy6z9	/award/award_nominee/award_nominations./award/award_nomination/award	/m/09sb52
/m/01rl_3	/soccer/football_team/current_roster./soccer/football_roster_position/position	/m/0dgrmp
/m/040njc	/award/award_category/nominees./award/award_nomination/nominated_for	/m/0c_j9x
/m/02wrhj	/award/award_nominee/award_nominations./award/award_nomination/nominated_for	/m/01h72l
/m/0bfvd4	/award/award_category/nominees./award/award_nomination/nominated_for	/m/06zsk51
/m/076psv	/film/film_set_designer/film_sets_designed	/m/0bcndz
/m/0126rp	/people/person/profession	/m/0np9r
/m/0mkg	/music/instrument/instrumentalists	/m/028qdb
/m/02pptm	/education/university/local_tuition./measurement_unit/dated_money_value/currency	/m/09nqf
/m/0l14md	/music/performance_role/regular_performances./music/group_membership/role	/m/0l14qv
/m/02ck7w	/award/award_winner/awards_won./award/award_honor/award_winner	/m/0154qm
/m/037cr1	/film/film/other_crew./film/film_crew_gig/film_crew_role	/m/0ch6mp2
/m/026p_bs	/film/film/release_date_s./film/film_regional_release_date/film_release_region	/m/0h7x
/m/027pfg	/film/film/release_date_s./film/film_regional_release_date/film_release_region	/m/0h7x
/m/011yph	/film/film/language	/m/02h40lc
/m/0bkj86	/education/educational_degree/people_with_this_degree./education/education/institution	/m/01c57n
/m/07jbh	/olympics/olympic_sport/athletes./olympics/olympic_athlete_affiliation/country	/m/06t2t
/m/01wg6y	/people/person/profession	/m/028kk_
/m/05n6sq	/film/film/other_crew./film/film_crew_gig/film_crew_role	/m/09vw2b7
/m/0dzst	/education/educational_institution/students_graduates./education/education/major_field_of_study	/m/02lp1
/m/03cw411	/film/film/release_date_s./film/film_regional_release_date/film_release_region	/m/0f8l9c
/m/04wvhz	/award/award_nominee/award_nominations./award/award_nomination/nominated_for	/m/0cz_ym
/m/0r6ff	/location/location/adjoin_s./location/adjoining_relationship/adjoins	/m/0r6c4
/m/0b_6pv	/base/marchmadness/ncaa_basketball_tournament/seeds./base/marchmadness/ncaa_tournament_seed/team	/m/026w398
/m/0bfvw2	/award/award_category/category_of	/m/0gcf2r
/m/011wtv	/film/film/production_companies	/m/016tt2
/m/04q7r	/music/performance_role/regular_performances./music/group_membership/role	/m/0l14md
/m/01q4qv	/people/person/spouse_s./people/marriage/type_of_union	/m/04ztj
/m/07jbh	/olympics/olympic_sport/athletes./olympics/olympic_athlete_affiliation/country	/m/06c1y
/m/027pfg	/film/film/release_date_s./film/film_regional_release_date/film_release_region	/m/03rk0
/m/01xdf5	/people/person/places_lived./people/place_lived/location	/m/0gkgp
/m/0755wz	/film/actor/film./film/performance/film	/m/03hp2y1
/m/0g96wd	/people/ethnicity/people	/m/015nhn
/m/02nhxf	/award/award_category/category_of	/m/0c4ys
/m/0l56b	/people/person/spouse_s./people/marriage/type_of_union	/m/04ztj
/m/05m_8	/sports/sports_team/roster./baseball/baseball_roster_position/position	/m/02lyr4
/m/015c2f	/people/person/spouse_s./people/marriage/type_of_union	/m/04ztj
/m/013zdg	/education/educational_degree/people_with_this_degree./education/education/institution	/m/02rff2
/m/0gy6z9	/base/schemastaging/person_extra/net_worth./measurement_unit/dated_money_value/currency	/m/09nqf
/m/05qhw	/location/location/contains	/m/0bdd_
/m/03l7tr	/soccer/football_team/current_roster./sports/sports_team_roster/position	/m/0dgrmp
/m/044mvs	/award/award_nominee/award_nominations./award/award_nomination/award_nominee	/m/03_wj_
/m/02_xgp2	/education/educational_degree/people_with_this_degree./education/education/major_field_of_study	/m/02mgp
/m/02qyntr	/award/award_category/nominees./award/award_nomination/nominated_for	/m/04vr_f
/m/05842k	/music/performance_role/track_performances./music/track_contribution/role	/m/02sgy
/m/02fm4d	/award/award_category/winners./award/award_honor/ceremony	/m/01s695
/m/06chf	/film/director/film	/m/01_0f7
/m/0645k5	/film/film/release_date_s./film/film_regional_release_date/film_release_region	/m/03gj2
/m/059dn	/user/ktrueman/default_domain/international_organization/member_states	/m/06npd
/m/06pj8	/award/award_nominee/award_nominations./award/award_nomination/nominated_for	/m/012mrr
/m/01z27	/olympics/olympic_sport/athletes./olympics/olympic_athlete_affiliation/country	/m/0d05w3
/m/04p5cr	/tv/tv_program/languages	/m/02h40lc
/m/0b7l4x	/film/film/language	/m/02h40lc
/m/04t9c0	/film/film/genre	/m/05p553
/m/01v1d8	/music/performance_role/guest_performances./music/recording_contribution/performance_role	/m/0l14md
/m/04wzr	/base/localfood/seasonal_month/produce_available./base/localfood/produce_availability/seasonal_months	/m/02xx5
/m/0bj25	/film/film/language	/m/064_8sq
/m/02s6sh	/music/artist/track_contributions./music/track_contribution/role	/m/05842k
/m/0hdx8	/olympics/olympic_participating_country/athletes./olympics/olympic_athlete_affiliation/olympics	/m/06sks6
/m/04jkpgv	/film/film/release_date_s./film/film_regional_release_date/film_release_region	/m/0d0vqn
/m/01gvpz	/film/film/language	/m/02h40lc
/m/04ztj	/people/marriage_union_type/unions_of_this_type./people/marriage/location_of_ceremony	/m/0r6c4
/m/0f5xn	/people/person/spouse_s./people/marriage/type_of_union	/m/04ztj
/m/0227tr	/film/actor/film./film/performance/film	/m/01ln5z
/m/0262zm	/award/award_category/disciplines_or_subjects	/m/0707q
/m/05k2s_	/award/award_nominee/award_nominations./award/award_nomination/award_nominee	/m/01qqtr
/m/028c_8	/sports/sports_position/players./sports/sports_team_roster/team	/m/04b5l3
/m/0gj9qxr	/film/film/release_date_s./film/film_regional_release_date/film_release_region	/m/0d0vqn
/m/0gtv7pk	/film/film/release_date_s./film/film_regional_release_date/film_release_region	/m/0f8l9c
/m/06cl2w	/people/person/profession	/m/0dxtg
/m/016mhd	/film/film/other_crew./film/film_crew_gig/film_crew_role	/m/0ch6mp2
/m/01cspq	/people/person/spouse_s./people/marriage/type_of_union	/m/04ztj
/m/0kjrx	/people/person/spouse_s./people/marriage/spouse	/m/015v3r
/m/028c_8	/sports/sports_position/players./sports/sports_team_roster/team	/m/0713r
/m/05lb65	/award/award_winner/awards_won./award/award_honor/award_winner	/m/03zqc1
/m/09wj5	/film/actor/film./film/performance/film	/m/01vksx
/m/0cwtm	/base/popstra/celebrity/friendship./base/popstra/friendship/participant	/m/01jw4r
/m/04nl83	/film/film/genre	/m/07s9rl0
/m/0tc7	/people/person/profession	/m/012t_z
/m/017yxq	/people/person/spouse_s./people/marriage/type_of_union	/m/04ztj
/m/03r1pr	/award/award_nominee/award_nominations./award/award_nomination/nominated_for	/m/01hq1
/m/0fz2y7	/time/event/instance_of_recurring_event	/m/0g_w
/m/03h304l	/people/person/gender	/m/05zppz
/m/025tlyv	/film/film_distributor/films_distributed./film/film_film_distributor_relationship/film	/m/0287477
/m/0_b9f	/film/film/genre	/m/02l7c8
/m/0g9wdmc	/film/film/country	/m/0f8l9c
/m/0gkd1	/music/performance_role/track_performances./music/track_contribution/role	/m/01v1d8
/m/0d0vqn	/olympics/olympic_participating_country/athletes./olympics/olympic_athlete_affiliation/olympics	/m/06sks6
/m/0k9j_	/award/award_nominee/award_nominations./award/award_nomination/nominated_for	/m/0ccck7
/m/06szd3	/award/hall_of_fame/inductees./award/hall_of_fame_induction/inductee	/m/01zlh5
/m/094jv	/location/location/time_zones	/m/02hcv8
/m/047d21r	/film/film/other_crew./film/film_crew_gig/film_crew_role	/m/0215hd
/m/05q8pss	/award/award_category/winners./award/award_honor/award_winner	/m/0147dk
/m/01q_ph	/award/award_nominee/award_nominations./award/award_nomination/nominated_for	/m/04yc76
/m/0djtky	/people/person/places_lived./people/place_lived/location	/m/01n7q
/m/02g8mp	/award/award_category/winners./award/award_honor/ceremony	/m/01s695
/m/05nlzq	/tv/tv_program/genre	/m/05p553
/m/0gy6z9	/award/award_nominee/award_nominations./award/award_nomination/award_nominee	/m/04wx2v
/m/0ddd9	/award/award_category/winners./award/award_honor/award_winner	/m/0m77m
/m/02qyntr	/award/award_category/nominees./award/award_nomination/nominated_for	/m/04m1bm
/m/0pk1p	/film/film/produced_by	/m/03ktjq
/m/014mlp	/education/educational_degree/people_with_this_degree./education/education/institution	/m/017d77
/m/0ql7q	/military/military_conflict/combatants./military/military_combatant_group/combatants	/m/01d8l
/m/01k_n63	/people/person/profession	/m/0n1h
/m/04vr_f	/film/film/other_crew./film/film_crew_gig/film_crew_role	/m/0dxtw
/m/0135xb	/people/person/places_lived./people/place_lived/location	/m/0619_
/m/07y2s	/base/schemastaging/organization_extra/phone_number./base/schemastaging/phone_sandbox/service_language	/m/02h40lc
/m/01gj8_	/people/person/places_lived./people/place_lived/location	/m/09c6w
/m/01vvydl	/award/award_nominee/award_nominations./award/award_nomination/award_nominee	/m/05vzw3
/m/014mlp	/education/educational_degree/people_with_this_degree./education/education/student	/m/012xdf
/m/03k7bd	/award/award_nominee/award_nominations./award/award_nomination/award	/m/0789_m
/m/03bzyn4	/film/film/edited_by	/m/04cy8rb
/m/042xrr	/award/award_nominee/award_nominations./award/award_nomination/nominated_for	/m/04vr_f
/m/06mm1x	/award/award_nominee/award_nominations./award/award_nomination/award_nominee	/m/03xp8d5
/m/0mrq3	/location/statistical_region/rent50_2./measurement_unit/dated_money_value/currency	/m/09nqf
/m/03s9b	/people/person/languages	/m/02h40lc
/m/0b_fw	/base/popstra/celebrity/dated./base/popstra/dated/participant	/m/01pl9g
/m/0dcrb	/medicine/disease/risk_factors	/m/074m2
/m/0dgrmp	/sports/sports_position/players./sports/sports_team_roster/team	/m/04j689
/m/03b1sb	/film/film/language	/m/02h40lc
/m/05r3qc	/film/film/other_crew./film/film_crew_gig/film_crew_role	/m/01pvkk
/m/06t74h	/people/person/spouse_s./people/marriage/type_of_union	/m/04ztj
/m/02qgqt	/award/award_winner/awards_won./award/award_honor/award_winner	/m/015v3r
/m/07jnt	/film/film/release_date_s./film/film_regional_release_date/film_release_region	/m/03gj2
/m/03yvf2	/film/film/release_date_s./film/film_regional_release_date/film_release_region	/m/0154j
/m/0d9xq	/people/person/spouse_s./people/marriage/type_of_union	/m/04ztj
/m/032d52	/business/business_operation/assets./measurement_unit/dated_money_value/currency	/m/09nqf
/m/0yx74	/location/location/time_zones	/m/02fqwt
/m/09qj50	/award/award_category/winners./award/award_honor/ceremony	/m/0gx_st
/m/015pvh	/people/person/spouse_s./people/marriage/type_of_union	/m/04ztj
/m/05842k	/music/performance_role/track_performances./music/track_contribution/role	/m/01qbl
/m/0bkmf	/people/person/religion	/m/0c8wxp
/m/01pbxb	/people/person/profession	/m/016z4k
/m/02n4kr	/media_common/netflix_genre/titles	/m/0ktpx
/m/026p_bs	/film/film/release_date_s./film/film_regional_release_date/film_release_region	/m/0d0vqn
/m/09yhzs	/award/award_winner/awards_won./award/award_honor/award_winner	/m/01gvr1
/m/03bzyn4	/film/film/produced_by	/m/02lf0c
/m/01y9xg	/award/award_nominee/award_nominations./award/award_nomination/award	/m/09sb52
/m/01gst_	/government/legislative_session/members./government/government_position_held/legislative_sessions	/m/01gsry
/m/0f25w9	/food/food/nutrients./food/nutrition_fact/nutrient	/m/0h1vg
/m/01hww_	/music/performance_role/track_performances./music/track_contribution/role	/m/01vdm0
/m/0pd64	/film/film/other_crew./film/film_crew_gig/film_crew_role	/m/0dxtw
/m/02wgln	/award/award_nominee/award_nominations./award/award_nomination/award	/m/09sb52
/m/03cw411	/film/film/cinematography	/m/07mb57
/m/02_xgp2	/education/educational_degree/people_with_this_degree./education/education/institution	/m/0lbfv
/m/0bynt	/olympics/olympic_sport/athletes./olympics/olympic_athlete_affiliation/country	/m/0b90_r
/m/0168t	/location/location/adjoin_s./location/adjoining_relationship/adjoins	/m/07ww5
/m/044prt	/people/person/nationality	/m/03rk0
/m/045bg	/people/person/place_of_birth	/m/05qtj
/m/03d2k	/award/award_nominee/award_nominations./award/award_nomination/award_nominee	/m/044gyq
/m/03wy70	/film/actor/dubbing_performances./film/dubbing_performance/language	/m/02h40lc
/m/09pgj2	/soccer/football_team/current_roster./soccer/football_roster_position/position	/m/0dgrmp
/m/04dn09n	/award/award_category/nominees./award/award_nomination/nominated_for	/m/07cdz
/m/0djb3vw	/film/film/other_crew./film/film_crew_gig/film_crew_role	/m/0ch6mp2
/m/0hsn_	/film/actor/film./film/performance/film	/m/064r97z
/m/02gnj2	/people/person/profession	/m/0dxtg
/m/01qz5	/film/film/other_crew./film/film_crew_gig/film_crew_role	/m/01pvkk
/m/03thw4	/people/person/gender	/m/05zppz
/m/04nfpk	/sports/sports_position/players./sports/sports_team_roster/team	/m/03ttn0
/m/0f2c8g	/people/person/place_of_birth	/m/0fl2s
/m/07l24	/sports/sports_team/roster./american_football/football_historical_roster_position/position_s	/m/05zm34
/m/05mt_q	/people/person/gender	/m/05zppz
/m/0dbns	/education/educational_institution/students_graduates./education/education/student	/m/05g3ss
/m/05pdd86	/film/film/other_crew./film/film_crew_gig/film_crew_role	/m/0215hd
/m/03_vx9	/award/award_nominee/award_nominations./award/award_nomination/award	/m/0bfvw2
/m/01xdf5	/film/actor/film./film/performance/film	/m/02y_lrp
/m/0807ml	/film/actor/film./film/performance/film	/m/0jqkh
/m/043ljr	/organization/organization/place_founded	/m/01qh7
/m/03nnm4t	/award/award_ceremony/awards_presented./award/award_honor/honored_for	/m/03ln8b
/m/03cv_gy	/tv/tv_program/regular_cast./tv/regular_tv_appearance/actor	/m/0g8st4
/m/0fgrm	/film/film/other_crew./film/film_crew_gig/film_crew_role	/m/01pvkk
/m/02nx2k	/film/film/other_crew./film/film_crew_gig/film_crew_role	/m/0ch6mp2
/m/0jt3qpk	/award/award_ceremony/awards_presented./award/award_honor/award_winner	/m/049_zz
/m/04nl83	/film/film/other_crew./film/film_crew_gig/film_crew_role	/m/0ch6mp2
/m/0f8l9c	/location/location/contains	/m/01j2_7
/m/0kp2_	/influence/influence_node/influenced_by	/m/01wd02c
/m/03ct7jd	/film/film/executive_produced_by	/m/06pj8
/m/033qdy	/film/film/genre	/m/02n4kr
/m/0x0d	/baseball/baseball_team/team_stats./baseball/baseball_team_stats/season	/m/026fmqm
/m/030_1m	/film/film_distributor/films_distributed./film/film_film_distributor_relationship/film	/m/05n6sq
/m/016tt2	/film/film_distributor/films_distributed./film/film_film_distributor_relationship/film	/m/0642ykh
/m/07y9ts	/award/award_ceremony/awards_presented./award/award_honor/honored_for	/m/03ln8b
/m/01cmp9	/award/award_winning_work/awards_won./award/award_honor/award	/m/0gs96
/m/01h18v	/film/film/estimated_budget./measurement_unit/dated_money_value/currency	/m/09nqf
/m/0n5gq	/location/location/contains	/m/0hptm
/m/01j6t0	/medicine/symptom/symptom_of	/m/07s4l
/m/0147dk	/award/award_nominee/award_nominations./award/award_nomination/award_nominee	/m/027kmrb
/m/0184jw	/people/person/places_lived./people/place_lived/location	/m/059_c
/m/02flpq	/award/award_category/winners./award/award_honor/ceremony	/m/02cg41
/m/03v3xp	/award/award_nominee/award_nominations./award/award_nomination/award	/m/0bdwqv
/m/05q8pss	/award/award_category/winners./award/award_honor/award_winner	/m/02zmh5
/m/065ydwb	/award/award_nominee/award_nominations./award/award_nomination/award_nominee	/m/03yrkt
/m/05mxw33	/award/award_nominee/award_nominations./award/award_nomination/award_nominee	/m/01svw8n
/m/016tt2	/film/film_distributor/films_distributed./film/film_film_distributor_relationship/film	/m/0cq7tx
/m/02_xgp2	/education/educational_degree/people_with_this_degree./education/education/institution	/m/07th_
/m/01wmxfs	/film/actor/film./film/performance/film	/m/01gglm
/m/016ywb	/film/film/written_by	/m/0prjs
/m/04nfpk	/sports/sports_position/players./sports/sports_team_roster/team	/m/06x76
/m/048lv	/award/award_nominee/award_nominations./award/award_nomination/award_nominee	/m/02js9p
/m/08sk8l	/film/film/other_crew./film/film_crew_gig/film_crew_role	/m/01pvkk
/m/0210hf	/award/award_nominee/award_nominations./award/award_nomination/award_nominee	/m/027r8p
/m/0dq3c	/government/government_office_category/officeholders./government/government_position_held/jurisdiction_of_office	/m/015fr
/m/0bykpk	/film/film/genre	/m/06lbpz
/m/0fqxc	/location/location/adjoin_s./location/adjoining_relationship/adjoins	/m/0fqxw
/m/0bzm__	/time/event/instance_of_recurring_event	/m/0g_w
/m/051zy_b	/award/award_winning_work/awards_won./award/award_honor/award_winner	/m/019pm_
/m/06sy4c	/sports/pro_athlete/teams./sports/sports_team_roster/team	/m/0j2jr
/m/0pc62	/film/film/genre	/m/07s9rl0
/m/087v17	/people/person/gender	/m/05zppz
/m/047gpsd	/film/film/language	/m/02h40lc
/m/0p_pd	/people/person/gender	/m/05zppz
/m/02l3_5	/film/actor/film./film/performance/film	/m/0jym0
/m/04ztj	/people/marriage_union_type/unions_of_this_type./people/marriage/location_of_ceremony	/m/0b90_r
/m/016tt2	/award/award_nominee/award_nominations./award/award_nomination/award	/m/0gvx_
/m/023kzp	/award/award_nominee/award_nominations./award/award_nomination/award	/m/0bfvd4
/m/0gkd1	/music/performance_role/track_performances./music/track_contribution/role	/m/0319l
/m/0bh8yn3	/film/film/release_date_s./film/film_regional_release_date/film_release_region	/m/03rk0
/m/090s_0	/tv/tv_program/regular_cast./tv/regular_tv_appearance/actor	/m/019_1h
/m/02sgy	/music/performance_role/track_performances./music/track_contribution/role	/m/050rj
/m/025ts_z	/film/film/featured_film_locations	/m/030qb3t
/m/09qj50	/award/award_category/winners./award/award_honor/award_winner	/m/0m66w
/m/0k54q	/film/film/production_companies	/m/016tt2
/m/014ps4	/influence/influence_node/influenced_by	/m/03j2gxx
/m/01w524f	/people/person/gender	/m/05zppz
/m/039zft	/film/film/language	/m/02h40lc
/m/0n5fl	/location/location/time_zones	/m/02hcv8
/m/01pcdn	/award/award_nominee/award_nominations./award/award_nomination/nominated_for	/m/0l76z
/m/03nnm4t	/award/award_ceremony/awards_presented./award/award_honor/award_winner	/m/02778pf
/m/06crng	/people/person/spouse_s./people/marriage/location_of_ceremony	/m/03rk0
/m/0627sn	/people/person/spouse_s./people/marriage/type_of_union	/m/04ztj
/m/02q_4ph	/award/award_nominated_work/award_nominations./award/award_nomination/nominated_for	/m/0bcndz
/m/0gbwp	/award/award_nominee/award_nominations./award/award_nomination/award	/m/054ks3
/m/03818y	/education/university/domestic_tuition./measurement_unit/dated_money_value/currency	/m/09nqf
/m/02mhfy	/film/actor/film./film/performance/film	/m/012mrr
/m/05gpy	/people/person/gender	/m/05zppz
/m/024dw0	/music/artist/track_contributions./music/track_contribution/role	/m/0l14md
/m/0319l	/music/performance_role/track_performances./music/track_contribution/role	/m/0l14qv
/m/0947l	/travel/travel_destination/climate./travel/travel_destination_monthly_climate/month	/m/028kb
/m/0jgd	/olympics/olympic_participating_country/athletes./olympics/olympic_athlete_affiliation/olympics	/m/06sks6
/m/024rwx	/tv/tv_program/regular_cast./tv/regular_tv_appearance/actor	/m/06nns1
/m/01npw8	/business/business_operation/assets./measurement_unit/dated_money_value/currency	/m/09nqf
/m/02l7c8	/media_common/netflix_genre/titles	/m/02_nsc
/m/07_3qd	/people/person/gender	/m/05zppz
/m/0m68w	/award/award_nominee/award_nominations./award/award_nomination/nominated_for	/m/0pk1p
/m/0fzrtf	/award/award_ceremony/awards_presented./award/award_honor/award_winner	/m/01bj6y
/m/0889x	/people/person/nationality	/m/0d0vqn
/m/05b4w	/sports/sports_team_location/teams	/m/01cw24
/m/0ntxg	/location/location/contains	/m/0sgxg
/m/011ysn	/film/film/other_crew./film/film_crew_gig/film_crew_role	/m/0215hd
/m/0420td	/soccer/football_team/current_roster./soccer/football_roster_position/position	/m/0dgrmp
/m/0gzlb9	/film/film/film_format	/m/07fb8_
/m/01ztgm	/celebrities/celebrity/sexual_relationships./celebrities/romantic_relationship/celebrity	/m/01vs_v8
/m/04hqbbz	/people/person/gender	/m/05zppz
/m/01hb6v	/people/person/place_of_birth	/m/0619_
/m/02qrbbx	/award/award_category/nominees./award/award_nomination/nominated_for	/m/01ffx4
/m/0f5xn	/people/person/gender	/m/05zppz
/m/021yw7	/award/award_nominee/award_nominations./award/award_nomination/award	/m/0gqz2
/m/0cz_ym	/film/film/genre	/m/07s9rl0
/m/01qbg5	/film/film/runtime./film/film_cut/film_release_region	/m/0jgd
/m/07s9rl0	/media_common/netflix_genre/titles	/m/05n6sq
/m/0b4rf3	/people/person/profession	/m/0dxtg
/m/05mt6w	/people/person/spouse_s./people/marriage/type_of_union	/m/04ztj
/m/07brj	/music/performance_role/track_performances./music/track_contribution/role	/m/01qbl
/m/02v60l	/base/popstra/celebrity/dated./base/popstra/dated/participant	/m/01pw2f1
/m/02h4rq6	/education/educational_degree/people_with_this_degree./education/education/institution	/m/07wlf
/m/02qtywd	/music/artist/track_contributions./music/track_contribution/role	/m/01vdm0
/m/02xbyr	/film/film/estimated_budget./measurement_unit/dated_money_value/currency	/m/09nqf
/m/04n65n	/people/person/gender	/m/05zppz
/m/02p65p	/award/award_nominee/award_nominations./award/award_nomination/award_nominee	/m/07s8r0
/m/04mlh8	/people/person/profession	/m/0np9r
/m/05c9zr	/film/film/film_format	/m/07fb8_
/m/07s9rl0	/media_common/netflix_genre/titles	/m/01br2w
/m/04sry	/film/director/film	/m/06cm5
/m/02brqp	/business/business_operation/industry	/m/020mfr
/m/04q7r	/music/performance_role/track_performances./music/track_contribution/role	/m/014zz1
/m/01b7lc	/organization/organization/headquarters./location/mailing_address/state_province_region	/m/01n7q
/m/02r858_	/film/film/genre	/m/07s9rl0
/m/0b7l4x	/film/film/genre	/m/0vgkd
/m/0ph2w	/people/deceased_person/place_of_death	/m/030qb3t
/m/0cf08	/film/film/language	/m/02h40lc
/m/054ks3	/award/award_category/winners./award/award_honor/award_winner	/m/02fgp0
/m/030hcs	/people/person/spouse_s./people/marriage/spouse	/m/030hbp
/m/02bvt	/award/award_nominee/award_nominations./award/award_nomination/award_nominee	/m/02wk_43
/m/0431v3	/tv/tv_program/languages	/m/02h40lc
/m/01hmb_	/film/actor/film./film/performance/film	/m/03wj4r8
/m/0755wz	/award/award_nominee/award_nominations./award/award_nomination/nominated_for	/m/011ywj
/m/0k9j_	/award/award_winner/awards_won./award/award_honor/award_winner	/m/029ql
/m/02cvp8	/people/person/gender	/m/05zppz
/m/03xgm3	/base/schemastaging/person_extra/net_worth./measurement_unit/dated_money_value/currency	/m/09nqf
/m/047fjjr	/film/film/other_crew./film/film_crew_gig/film_crew_role	/m/09vw2b7
/m/04dn09n	/award/award_category/nominees./award/award_nomination/nominated_for	/m/04vr_f
/m/02mt4k	/award/award_nominee/award_nominations./award/award_nomination/award	/m/0gr4k
/m/062ftr	/people/person/profession	/m/0dxtg
/m/07nxvj	/film/film/estimated_budget./measurement_unit/dated_money_value/currency	/m/09nqf
/m/09blyk	/media_common/netflix_genre/titles	/m/0k0rf
/m/06npd	/military/military_combatant/military_conflicts./military/military_combatant_group/combatants	/m/06c1y
/m/02gs6r	/film/film/release_date_s./film/film_regional_release_date/film_release_region	/m/05qhw
/m/0m31m	/people/person/gender	/m/05zppz
/m/03m9c8	/award/award_nominee/award_nominations./award/award_nomination/award_nominee	/m/01kt17
/m/015vq_	/award/award_nominee/award_nominations./award/award_nomination/nominated_for	/m/016ks5
/m/01qq_lp	/people/person/places_lived./people/place_lived/location	/m/030qb3t
/m/01vksx	/film/film/release_date_s./film/film_regional_release_date/film_release_region	/m/047yc
/m/03d2k	/people/person/languages	/m/02h40lc
/m/02wtp6	/film/film/other_crew./film/film_crew_gig/film_crew_role	/m/0ch6mp2
/m/06cp5	/music/genre/artists	/m/04qmr
/m/07vqnc	/tv/tv_program/genre	/m/025s89p
/m/01lyv	/music/genre/artists	/m/01wmgrf
/m/05g49	/sports/sports_team/roster./american_football/football_historical_roster_position/position_s	/m/0b13yt
/m/013q07	/film/film/estimated_budget./measurement_unit/dated_money_value/currency	/m/09nqf
/m/060pl5	/people/person/profession	/m/0dxtg
/m/02cqbx	/people/person/places_lived./people/place_lived/location	/m/059_c
/m/0gkz15s	/film/film/release_date_s./film/film_regional_release_date/film_release_region	/m/0chghy
/m/0cqt90	/base/schemastaging/person_extra/net_worth./measurement_unit/dated_money_value/currency	/m/09nqf
/m/05qbckf	/film/film/language	/m/06b_j
/m/047bynf	/film/film/genre	/m/07s9rl0
/m/01w40h	/music/record_label/artist	/m/01wg25j
/m/02825nf	/film/film/release_date_s./film/film_regional_release_date/film_release_region	/m/05b4w
/m/0147dk	/award/award_winner/awards_won./award/award_honor/award_winner	/m/02ts3h
/m/026p4q7	/film/film/genre	/m/02l7c8
/m/076tq0z	/film/film/genre	/m/05p553
/m/01nf9x	/base/biblioness/bibs_location/country	/m/0chghy
/m/01j95f	/soccer/football_team/current_roster./sports/sports_team_roster/position	/m/0dgrmp
/m/02k84w	/music/performance_role/regular_performances./music/group_membership/role	/m/01qbl
/m/0crvfq	/award/award_winner/awards_won./award/award_honor/award_winner	/m/0b_dy
/m/01q4qv	/film/director/film	/m/0k20s
/m/0bqs56	/influence/influence_node/influenced_by	/m/0127xk
/m/03c_pqj	/people/person/profession	/m/0dxtg
/m/011yhm	/film/film/genre	/m/05p553
/m/03xq0f	/film/film_distributor/films_distributed./film/film_film_distributor_relationship/film	/m/0gyv0b4
/m/03d2k	/music/artist/track_contributions./music/track_contribution/role	/m/02sgy
/m/07qg8v	/film/film/country	/m/0f8l9c
/m/03h_0_z	/award/award_nominee/award_nominations./award/award_nomination/award_nominee	/m/01vw20h
/m/0g5llry	/organization/organization/headquarters./location/mailing_address/citytown	/m/0f2r6
/m/0gx_p	/award/award_nominee/award_nominations./award/award_nomination/award_nominee	/m/01jz6x
/m/018_q8	/award/ranked_item/appears_in_ranked_lists./award/ranking/list	/m/01pd60
/m/07b8m1	/soccer/football_team/current_roster./sports/sports_team_roster/position	/m/0dgrmp
/m/0l14md	/music/instrument/instrumentalists	/m/01ww_vs
/m/0gps0z	/people/person/place_of_birth	/m/02hrh0_
/m/063t3j	/award/award_nominee/award_nominations./award/award_nomination/award	/m/01c92g
/m/0bkj86	/education/educational_degree/people_with_this_degree./education/education/major_field_of_study	/m/01lhy
/m/03176f	/film/film/other_crew./film/film_crew_gig/film_crew_role	/m/0ch6mp2
/m/02sgy	/music/performance_role/track_performances./music/track_contribution/role	/m/03gvt
/m/05vsb7	/sports/sports_league_draft/picks./sports/sports_league_draft_pick/school	/m/01wdj_
/m/034q3l	/people/person/gender	/m/05zppz
/m/06w6_	/people/person/languages	/m/02h40lc
/m/019c57	/organization/non_profit_organization/registered_with./organization/non_profit_registration/registering_agency	/m/03z19
/m/03xpsrx	/award/award_nominee/award_nominations./award/award_nomination/award	/m/0cqhk0
/m/0bynt	/olympics/olympic_sport/athletes./olympics/olympic_athlete_affiliation/country	/m/0jgx
/m/0cp0ph6	/film/film/other_crew./film/film_crew_gig/film_crew_role	/m/0ch6mp2
/m/0ywqc	/people/person/languages	/m/02h40lc
/m/0bs0bh	/award/award_category/winners./award/award_honor/award_winner	/m/030hcs
/m/01vvyc_	/award/award_nominee/award_nominations./award/award_nomination/award	/m/03t5b6
/m/01nds	/organization/organization/headquarters./location/mailing_address/citytown	/m/03hrz
/m/02y_lrp	/film/film/executive_produced_by	/m/03h304l
/m/0c3ybss	/film/film/language	/m/02h40lc
/m/0fpzt5	/people/person/places_lived./people/place_lived/location	/m/0f2r6
/m/06t74h	/award/award_nominee/award_nominations./award/award_nomination/award	/m/09sb52
/m/02vr3gz	/film/film/release_date_s./film/film_regional_release_date/film_release_region	/m/06t2t
/m/0bpm4yw	/film/film/release_date_s./film/film_regional_release_date/film_release_region	/m/03gj2
/m/054krc	/award/award_category/nominees./award/award_nomination/nominated_for	/m/01ry_x
/m/0gkd1	/music/performance_role/regular_performances./music/group_membership/role	/m/03gvt
/m/02qlg7s	/award/award_nominee/award_nominations./award/award_nomination/award_nominee	/m/028qdb
/m/01w7nwm	/award/award_nominee/award_nominations./award/award_nomination/award	/m/02f716
/m/09sdmz	/award/award_category/nominees./award/award_nomination/nominated_for	/m/0h1x5f
/m/0686zv	/film/actor/film./film/performance/film	/m/0879bpq
/m/03zg2x	/award/award_nominee/award_nominations./award/award_nomination/award_nominee	/m/05k2s_
/m/0l14md	/music/performance_role/track_performances./music/track_contribution/role	/m/01w4c9
/m/0160w	/location/location/time_zones	/m/02hcv8
/m/01w724	/award/award_nominee/award_nominations./award/award_nomination/award	/m/01c92g
/m/02lnhv	/base/schemastaging/person_extra/net_worth./measurement_unit/dated_money_value/currency	/m/09nqf
/m/023r2x	/music/performance_role/track_performances./music/track_contribution/role	/m/03qlv7
/m/06wjf	/base/aareas/schema/administrative_area/administrative_parent	/m/0d05w3
/m/015t56	/award/award_nominee/award_nominations./award/award_nomination/award_nominee	/m/019pm_
/m/049w1q	/film/film/release_date_s./film/film_regional_release_date/film_release_region	/m/05b4w
/m/011s9r	/people/person/profession	/m/0n1h
/m/05842k	/music/performance_role/regular_performances./music/group_membership/role	/m/028tv0
/m/0x67	/people/ethnicity/people	/m/040j2_
/m/02zfdp	/award/award_nominee/award_nominations./award/award_nomination/award_nominee	/m/0h1nt
/m/0c53zb	/award/award_ceremony/awards_presented./award/award_honor/honored_for	/m/014knw
/m/05q8pss	/award/award_category/winners./award/award_honor/award_winner	/m/023361
/m/0169dl	/people/person/gender	/m/05zppz
/m/016tt2	/film/film_distributor/films_distributed./film/film_film_distributor_relationship/film	/m/05sns6
/m/049gc	/people/person/spouse_s./people/marriage/type_of_union	/m/04ztj
/m/035gt8	/business/business_operation/assets./measurement_unit/dated_money_value/currency	/m/09nqf
/m/01p79b	/education/educational_institution/students_graduates./education/education/major_field_of_study	/m/02_7t
/m/01w4c9	/music/performance_role/track_performances./music/track_contribution/role	/m/07brj
/m/01g7_r	/organization/endowed_organization/endowment./measurement_unit/dated_money_value/currency	/m/09nqf
/m/02lxj_	/people/person/place_of_birth	/m/06_kh
/m/01r_t_	/people/person/spouse_s./people/marriage/type_of_union	/m/04ztj
/m/04h68j	/film/director/film	/m/01g3gq
/m/054ks3	/award/award_category/winners./award/award_honor/award_winner	/m/01k23t
/m/04ztj	/people/marriage_union_type/unions_of_this_type./people/marriage/location_of_ceremony	/m/08966
/m/0h0wd9	/film/film/produced_by	/m/03thw4
/m/01hxs4	/celebrities/celebrity/celebrity_friends./celebrities/friendship/friend	/m/0335fp
/m/033_1p	/base/popstra/celebrity/dated./base/popstra/dated/participant	/m/012xdf
/m/0gy6z9	/award/award_nominee/award_nominations./award/award_nomination/award_nominee	/m/0bqdvt
/m/02f9wb	/people/person/profession	/m/0dxtg
/m/0g2lq	/award/award_nominee/award_nominations./award/award_nomination/nominated_for	/m/011yd2
/m/014dm6	/people/person/gender	/m/05zppz
/m/05bnq3j	/award/award_nominee/award_nominations./award/award_nomination/award_nominee	/m/01xdf5
/m/0bkj86	/education/educational_degree/people_with_this_degree./education/education/institution	/m/05t7c1
/m/01vs_v8	/people/person/languages	/m/02h40lc
/m/0dgrmp	/sports/sports_position/players./sports/sports_team_roster/team	/m/090q8l
/m/059_gf	/award/award_nominee/award_nominations./award/award_nomination/award	/m/0bfvd4
/m/013zdg	/education/educational_degree/people_with_this_degree./education/education/institution	/m/02897w
/m/0824r	/location/statistical_region/religions./location/religion_percentage/religion	/m/0631_
/m/012wyq	/location/location/contains	/m/0nbrp
/m/0gls4q_	/award/award_nominee/award_nominations./award/award_nomination/award_nominee	/m/0fxky3
/m/0h7x	/organization/organization_member/member_of./organization/organization_membership/organization	/m/02jxk
/m/0468g4r	/award/award_category/winners./award/award_honor/award_winner	/m/06pj8
/m/0cqhk0	/award/award_category/winners./award/award_honor/award_winner	/m/0266r6h
/m/02q636	/education/educational_institution/students_graduates./education/education/student	/m/01ps2h8
/m/07z4p5	/people/person/gender	/m/05zppz
/m/04vr_f	/film/film/genre	/m/07s9rl0
/m/0hn10	/media_common/netflix_genre/titles	/m/0k0rf
/m/0c40vxk	/film/film/release_date_s./film/film_regional_release_date/film_release_region	/m/06c1y
/m/047g98	/soccer/football_team/current_roster./sports/sports_team_roster/position	/m/0dgrmp
/m/0hr41p6	/tv/tv_program/genre	/m/0vgkd
/m/051z6rz	/award/award_nominee/award_nominations./award/award_nomination/nominated_for	/m/026p4q7
/m/04bdqk	/people/person/languages	/m/02h40lc
/m/06c53w	/people/person/nationality	/m/03rk0
/m/08s6mr	/film/film/production_companies	/m/016tt2
/m/02qyntr	/award/award_category/nominees./award/award_nomination/nominated_for	/m/09tkzy
/m/01j7z7	/award/award_nominee/award_nominations./award/award_nomination/award_nominee	/m/03rwz3
/m/0dgrmp	/sports/sports_position/players./sports/sports_team_roster/team	/m/02rh_0
/m/0jtg0	/music/instrument/instrumentalists	/m/01tw31
/m/0170xl	/film/film/music	/m/03h610
/m/0fphgb	/film/film/release_date_s./film/film_regional_release_date/film_release_region	/m/0b90_r
/m/0l15bq	/music/performance_role/regular_performances./music/group_membership/role	/m/07brj
/m/03yvf2	/film/film/release_date_s./film/film_regional_release_date/film_release_region	/m/0f8l9c
/m/031786	/film/film/other_crew./film/film_crew_gig/film_crew_role	/m/04pyp5
/m/018zvb	/influence/influence_node/influenced_by	/m/019z7q
/m/01vng3b	/people/person/profession	/m/01c72t
/m/0dgrmp	/sports/sports_position/players./sports/sports_team_roster/team	/m/059nf5
/m/02sgy	/music/performance_role/track_performances./music/track_contribution/role	/m/02k84w
/m/0193qj	/military/military_combatant/military_conflicts./military/military_combatant_group/combatants	/m/02psqkz
/m/037s9x	/education/educational_institution/students_graduates./education/education/student	/m/01rc4p
/m/01vvyc_	/people/person/gender	/m/05zppz
/m/058kqy	/film/actor/film./film/performance/film	/m/08rr3p
/m/01rhl	/music/performance_role/track_performances./music/track_contribution/role	/m/01vdm0
/m/0n5fl	/location/location/adjoin_s./location/adjoining_relationship/adjoins	/m/0mwxz
/m/01xvb	/american_football/football_team/current_roster./sports/sports_team_roster/position	/m/05zm34
/m/080dyk	/people/person/places_lived./people/place_lived/location	/m/01l63
/m/01gsrl	/government/legislative_session/members./government/government_position_held/legislative_sessions	/m/01gstn
/m/0154j	/military/military_combatant/military_conflicts./military/military_combatant_group/combatants	/m/087vz
/m/01pcj4	/education/university/local_tuition./measurement_unit/dated_money_value/currency	/m/09nqf
/m/01b7lc	/education/university/domestic_tuition./measurement_unit/dated_money_value/currency	/m/09nqf
/m/022_lg	/influence/influence_node/influenced_by	/m/032md
/m/017z88	/education/educational_institution/students_graduates./education/education/student	/m/04y79_n
/m/0230rx	/soccer/football_team/current_roster./sports/sports_team_roster/position	/m/0dgrmp
/m/03ncb2	/award/award_category/winners./award/award_honor/ceremony	/m/019bk0
/m/0gyv0b4	/film/film/language	/m/012w70
/m/01mwsnc	/people/person/spouse_s./people/marriage/type_of_union	/m/04ztj
/m/0jz71	/film/film/genre	/m/05p553
/m/07mb57	/award/award_nominee/award_nominations./award/award_nomination/nominated_for	/m/03cw411
/m/02wxvtv	/people/person/nationality	/m/03rk0
/m/03sbb	/people/profession/specialization_of	/m/06q2q
/m/0x67	/people/ethnicity/people	/m/03xx9l
/m/07z542	/award/award_nominee/award_nominations./award/award_nomination/award_nominee	/m/01m15br
/m/03gn1x	/education/educational_institution/students_graduates./education/education/major_field_of_study	/m/01lj9
/m/03r1pr	/people/person/place_of_birth	/m/0mpbx
/m/01ps2h8	/people/person/places_lived./people/place_lived/location	/m/07ylj
/m/025tlyv	/organization/organization/headquarters./location/mailing_address/state_province_region	/m/01n7q
/m/0prfz	/award/award_nominee/award_nominations./award/award_nomination/award_nominee	/m/036hf4
/m/016mhd	/film/film/executive_produced_by	/m/02z6l5f
/m/076psv	/film/film_set_designer/film_sets_designed	/m/02q_4ph
/m/0dfw0	/film/film/distributors./film/film_film_distributor_relationship/film_distribution_medium	/m/0dq6p
/m/05lb65	/award/award_nominee/award_nominations./award/award_nomination/award_nominee	/m/05lb87
/m/01f_3w	/music/record_label/artist	/m/01wj5hp
/m/0g2lq	/award/award_nominee/award_nominations./award/award_nomination/award	/m/040njc
/m/04cl1	/award/award_nominee/award_nominations./award/award_nomination/award	/m/0cqhk0
/m/02g9p4	/music/instrument/instrumentalists	/m/045zr
/m/01gpzx	/location/administrative_division/first_level_division_of	/m/0h7x
/m/057xkj_	/sports/sports_team/roster./american_football/football_roster_position/position	/m/05zm34
/m/0ddjy	/film/film/language	/m/02h40lc
/m/01y9r2	/film/film/production_companies	/m/016tt2
/m/02bvt	/people/person/gender	/m/05zppz
/m/015c2f	/base/popstra/celebrity/friendship./base/popstra/friendship/participant	/m/0m66w
/m/0f8l9c	/location/location/contains	/m/011w4n
/m/0br1x_	/base/marchmadness/ncaa_basketball_tournament/seeds./base/marchmadness/ncaa_tournament_seed/team	/m/026w398
/m/0cwx_	/business/business_operation/revenue./measurement_unit/dated_money_value/currency	/m/09nqf
/m/09qwmm	/award/award_category/nominees./award/award_nomination/nominated_for	/m/0bnzd
/m/04ddm4	/film/film/release_date_s./film/film_regional_release_date/film_release_region	/m/0d0vqn
/m/04cl1	/award/award_nominee/award_nominations./award/award_nomination/award	/m/08_vwq
/m/0330r	/award/award_winning_work/awards_won./award/award_honor/award	/m/09qvc0
/m/0gh65c5	/film/film/release_date_s./film/film_regional_release_date/film_release_region	/m/05qhw
/m/0bkj86	/education/educational_degree/people_with_this_degree./education/education/major_field_of_study	/m/037mh8
/m/01n7q	/location/location/contains	/m/0kpzy
/m/07l24	/sports/professional_sports_team/draft_picks./sports/sports_league_draft_pick/draft	/m/02qw1zx
/m/01zlwg6	/base/biblioness/bibs_location/state	/m/01n7q
/m/02sgy	/music/performance_role/track_performances./music/track_contribution/role	/m/0jtg0
/m/02zq43	/award/award_nominee/award_nominations./award/award_nomination/award_nominee	/m/05vsxz
/m/05dtwm	/award/award_nominee/award_nominations./award/award_nomination/award_nominee	/m/01rzqj
/m/07jqjx	/film/film/release_date_s./film/film_regional_release_date/film_release_region	/m/0f8l9c
/m/01h4rj	/people/person/gender	/m/05zppz
/m/0b6l1st	/film/film/produced_by	/m/06chf
/m/03bx2lk	/film/film/release_date_s./film/film_regional_release_date/film_release_region	/m/06t2t
/m/01y_px	/film/actor/film./film/performance/film	/m/0sxgv
/m/05z55	/food/food/nutrients./food/nutrition_fact/nutrient	/m/0f4k5
/m/017gl1	/film/film/release_date_s./film/film_regional_release_date/film_release_region	/m/06c1y
/m/09ntbc	/soccer/football_player/current_team./sports/sports_team_roster/team	/m/01x4wq
/m/0d0vqn	/olympics/olympic_participating_country/medals_won./olympics/olympic_medal_honor/olympics	/m/0nbjq
/m/03gj2	/base/aareas/schema/administrative_area/administrative_parent	/m/02j71
/m/09gdh6k	/film/film/other_crew./film/film_crew_gig/film_crew_role	/m/09vw2b7
/m/076lxv	/film/film_set_designer/film_sets_designed	/m/0gcrg
/m/04rqd	/broadcast/content/artist	/m/01vvydl
/m/040njc	/award/award_category/nominees./award/award_nomination/nominated_for	/m/0jyx6
/m/05p09dd	/award/award_winning_work/awards_won./award/award_honor/award	/m/0274v0r
/m/01vw917	/music/artist/origin	/m/030qb3t
/m/0k4y6	/time/event/locations	/m/059g4
/m/03pbf	/sports/sports_team_location/teams	/m/0175tv
/m/0f8l9c	/location/location/contains	/m/0d117
/m/0315q3	/base/popstra/celebrity/friendship./base/popstra/friendship/participant	/m/01q_ph
/m/04bdxl	/award/award_nominee/award_nominations./award/award_nomination/nominated_for	/m/0b76t12
/m/0b90_r	/olympics/olympic_participating_country/medals_won./olympics/olympic_medal_honor/olympics	/m/0jhn7
/m/02qyntr	/award/award_category/nominees./award/award_nomination/nominated_for	/m/012mrr
/m/01xdxy	/award/award_nominated_work/award_nominations./award/award_nomination/nominated_for	/m/0dyb1
/m/01wj18h	/award/award_nominee/award_nominations./award/award_nomination/award	/m/02f777
/m/0cl0bk	/award/award_winner/awards_won./award/award_honor/award_winner	/m/0cj36c
/m/0f5xn	/film/actor/film./film/performance/film	/m/0f4_l
/m/016z1c	/people/deceased_person/place_of_death	/m/06_kh
/m/03rgvr	/award/award_nominee/award_nominations./award/award_nomination/award_nominee	/m/059t6d
/m/01n7q	/location/location/contains	/m/015zxh
/m/057176	/award/award_nominee/award_nominations./award/award_nomination/award	/m/09sb52
/m/0xnvg	/people/ethnicity/people	/m/013qvn
/m/05r9t	/music/genre/artists	/m/014hr0
/m/05p09zm	/award/award_category/nominees./award/award_nomination/nominated_for	/m/0dfw0
/m/06yxd	/location/location/contains	/m/057wlm
/m/07yvsn	/film/film/other_crew./film/film_crew_gig/film_crew_role	/m/01pvkk
/m/02jkkv	/film/film/genre	/m/05p553
/m/03rhqg	/music/record_label/artist	/m/01wg6y
/m/0gyh2wm	/film/film/production_companies	/m/024rbz
/m/02x8n1n	/award/award_category/nominees./award/award_nomination/nominated_for	/m/04jm_hq
/m/02gkzs	/government/legislative_session/members./government/government_position_held/legislative_sessions	/m/02glc4
/m/0b76d_m	/film/film/genre	/m/07s9rl0
/m/0d_w7	/people/person/places_lived./people/place_lived/location	/m/01n7q
/m/0bzm__	/award/award_ceremony/awards_presented./award/award_honor/award_winner	/m/01w1kyf
/m/07nznf	/base/schemastaging/person_extra/net_worth./measurement_unit/dated_money_value/currency	/m/09nqf
/m/02qyntr	/award/award_category/nominees./award/award_nomination/nominated_for	/m/049xgc
/m/014mlp	/education/educational_degree/people_with_this_degree./education/education/institution	/m/014jyk
/m/0fhpv4	/award/award_category/nominees./award/award_nomination/nominated_for	/m/011wtv
/m/05sq84	/people/person/spouse_s./people/marriage/type_of_union	/m/04ztj
/m/02_1sj	/film/film/other_crew./film/film_crew_gig/film_crew_role	/m/09vw2b7
/m/04xfb	/people/person/spouse_s./people/marriage/type_of_union	/m/04ztj
/m/058kqy	/people/person/places_lived./people/place_lived/location	/m/030qb3t
/m/02blr4	/people/person/gender	/m/05zppz
/m/040njc	/award/award_category/nominees./award/award_nomination/nominated_for	/m/05qm9f
/m/01qrb2	/education/educational_institution/students_graduates./education/education/major_field_of_study	/m/02_7t
/m/0457w0	/people/person/place_of_birth	/m/09b8m
/m/040njc	/award/award_category/nominees./award/award_nomination/nominated_for	/m/0gl3hr
/m/01fyzy	/award/award_nominee/award_nominations./award/award_nomination/award	/m/05p09zm
/m/01cspq	/people/person/gender	/m/05zppz
/m/0qmhk	/film/film/genre	/m/07s9rl0
/m/0gtv7pk	/film/film/release_date_s./film/film_regional_release_date/film_release_region	/m/0b90_r
/m/017r2	/people/person/places_lived./people/place_lived/location	/m/09f8q
/m/0q34g	/base/aareas/schema/administrative_area/administrative_parent	/m/09ctj
/m/02q_x_l	/film/film/country	/m/0chghy
/m/0l786	/people/person/spouse_s./people/marriage/spouse	/m/031sg0
/m/065ym0c	/film/film/release_date_s./film/film_regional_release_date/film_release_region	/m/07f1x
/m/0lp_cd3	/award/award_ceremony/awards_presented./award/award_honor/award_winner	/m/01j7rd
/m/02cqbx	/people/person/place_of_birth	/m/0r4qq
/m/0kbf1	/film/film/language	/m/02h40lc
/m/02pgky2	/award/award_ceremony/awards_presented./award/award_honor/award_winner	/m/02kxbwx
/m/0l14qv	/music/performance_role/track_performances./music/track_contribution/role	/m/05842k
/m/09d5d5	/people/person/gender	/m/05zppz
/m/02x2khw	/sports/sports_league_draft/picks./sports/sports_league_draft_pick/school	/m/01jq4b
/m/0jhn7	/user/jg/default_domain/olympic_games/sports	/m/0crlz
/m/0bvn25	/film/film/language	/m/02h40lc
/m/01gfq4	/music/record_label/artist	/m/02whj
/m/05k2s_	/award/award_nominee/award_nominations./award/award_nomination/award_nominee	/m/04bdxl
/m/07tp2	/location/statistical_region/gdp_nominal_per_capita./measurement_unit/dated_money_value/currency	/m/09nqf
/m/02dwj	/film/film/film_production_design_by	/m/04kj2v
/m/03qlv7	/music/performance_role/track_performances./music/track_contribution/role	/m/05kms
/m/02q0v8n	/film/film/music	/m/023361
/m/04dqdk	/people/person/gender	/m/05zppz
/m/04gp58p	/film/film/other_crew./film/film_crew_gig/film_crew_role	/m/0ch6mp2
/m/0h5f5n	/award/award_nominee/award_nominations./award/award_nomination/award_nominee	/m/02z2xdf
/m/052hl	/people/person/profession	/m/0np9r
/m/0pk1p	/award/award_winning_work/awards_won./award/award_honor/award_winner	/m/03ktjq
/m/01sjz_	/organization/organization/headquarters./location/mailing_address/state_province_region	/m/01w0v
/m/0bx8pn	/education/educational_institution/school_type	/m/04qbv
/m/07yvsn	/film/film/language	/m/02h40lc
/m/02z2xdf	/award/award_nominee/award_nominations./award/award_nomination/award_nominee	/m/06pj8
/m/02x2khw	/sports/sports_league_draft/picks./sports/sports_league_draft_pick/school	/m/01dzg0
/m/02xwq9	/award/award_nominee/award_nominations./award/award_nomination/award_nominee	/m/03zqc1
/m/03gh4	/base/popstra/location/vacationers./base/popstra/vacation_choice/vacationer	/m/0320jz
/m/03bdkd	/film/film/language	/m/02h40lc
/m/05nlzq	/tv/tv_program/genre	/m/0pr6f
/m/04v09	/olympics/olympic_participating_country/athletes./olympics/olympic_athlete_affiliation/olympics	/m/06sks6
/m/0194xc	/people/person/sibling_s./people/sibling_relationship/sibling	/m/0d3k14
/m/0cq806	/film/film/genre	/m/04xvh5
/m/0l14md	/music/performance_role/regular_performances./music/group_membership/role	/m/0jtg0
/m/03bxh	/people/person/gender	/m/05zppz
/m/0cj36c	/award/award_winner/awards_won./award/award_honor/award_winner	/m/072bb1
/m/01vs_v8	/award/award_nominee/award_nominations./award/award_nomination/award	/m/02f73b
/m/03yvf2	/film/film/genre	/m/06nbt
/m/01v1d8	/music/performance_role/regular_performances./music/group_membership/role	/m/0l14md
/m/05ch98	/film/film/other_crew./film/film_crew_gig/film_crew_role	/m/09vw2b7
/m/014dm6	/people/person/spouse_s./people/marriage/type_of_union	/m/04ztj
/m/05q7cj	/award/award_ceremony/awards_presented./award/award_honor/honored_for	/m/04t9c0
/m/01k2wn	/business/business_operation/revenue./measurement_unit/dated_money_value/currency	/m/09nqf
/m/0bdwqv	/award/award_category/winners./award/award_honor/ceremony	/m/0gx_st
/m/0jt5zcn	/location/location/contains	/m/0ymgk
/m/0xnvg	/people/ethnicity/people	/m/02lf70
/m/021vwt	/people/person/spouse_s./people/marriage/type_of_union	/m/04ztj
/m/0686zv	/film/actor/film./film/performance/film	/m/01cmp9
/m/0b76t12	/film/film/release_date_s./film/film_regional_release_date/film_release_region	/m/0chgzm
/m/05dxl_	/people/person/gender	/m/05zppz
/m/07wlf	/education/educational_institution/students_graduates./education/education/major_field_of_study	/m/02lp1
/m/03xq0f	/film/film_distributor/films_distributed./film/film_film_distributor_relationship/film	/m/02x6dqb
/m/07g9f	/award/award_winning_work/awards_won./award/award_honor/award_winner	/m/02q5xsx
/m/040njc	/award/award_category/nominees./award/award_nomination/nominated_for	/m/08nvyr
/m/03cglm	/film/actor/film./film/performance/film	/m/0drnwh
/m/0gvx_	/award/award_category/winners./award/award_honor/ceremony	/m/073hmq
/m/01pfkw	/people/person/gender	/m/05zppz
/m/02p2zq	/award/award_nominee/award_nominations./award/award_nomination/award	/m/01c92g
/m/06s7rd	/base/popstra/celebrity/dated./base/popstra/dated/participant	/m/02ts3h
/m/0h584v	/award/award_nominee/award_nominations./award/award_nomination/award_nominee	/m/0h5jg5
/m/02qgqt	/people/person/gender	/m/05zppz
/m/0dkb83	/soccer/football_team/current_roster./sports/sports_team_roster/position	/m/0dgrmp
/m/018mxj	/base/schemastaging/organization_extra/phone_number./base/schemastaging/phone_sandbox/service_location	/m/02j71
/m/0hptm	/location/hud_county_place/county	/m/0n5gq
/m/09px1w	/people/person/gender	/m/05zppz
/m/0175zz	/music/genre/artists	/m/06p03s
/m/086xm	/organization/non_profit_organization/registered_with./organization/non_profit_registration/registering_agency	/m/03z19
/m/01wz_ml	/people/person/gender	/m/05zppz
/m/01sdzg	/sports/sports_position/players./sports/sports_team_roster/team	/m/07l8x
/m/04nfpk	/sports/sports_position/players./sports/sports_team_roster/team	/m/0ftf0f
/m/0209hj	/film/film/produced_by	/m/0kr5_
/m/0cc5tgk	/award/award_nominee/award_nominations./award/award_nomination/award_nominee	/m/01wj18h
/m/01w0yrc	/base/schemastaging/person_extra/net_worth./measurement_unit/dated_money_value/currency	/m/09nqf
/m/01vqrm	/people/person/gender	/m/05zppz
/m/0bshwmp	/film/film/language	/m/02h40lc
/m/0dyb1	/film/film/release_date_s./film/film_regional_release_date/film_release_region	/m/015fr
/m/02p65p	/people/person/gender	/m/05zppz
/m/02x20c9	/people/person/profession	/m/012t_z
/m/04rrx	/location/location/contains	/m/013d_f
/m/02s6sh	/people/person/gender	/m/05zppz
/m/05r3qc	/film/film/genre	/m/0556j8
/m/0bynt	/olympics/olympic_sport/athletes./olympics/olympic_athlete_affiliation/country	/m/0d05w3
/m/0bqdvt	/people/person/spouse_s./people/marriage/type_of_union	/m/04ztj
/m/01hqhm	/film/film/language	/m/02h40lc
/m/01_x6v	/base/schemastaging/person_extra/net_worth./measurement_unit/dated_money_value/currency	/m/09nqf
/m/071t0	/olympics/olympic_sport/athletes./olympics/olympic_athlete_affiliation/country	/m/03rk0
/m/01lnyf	/education/educational_institution/colors	/m/088fh
/m/0x67	/people/ethnicity/people	/m/03j0br4
/m/011xg5	/film/film/genre	/m/07s9rl0
/m/04g5k	/location/statistical_region/gdp_nominal_per_capita./measurement_unit/dated_money_value/currency	/m/09nqf
/m/03ln8b	/tv/tv_program/languages	/m/02h40lc
/m/06gn7r	/people/person/places_lived./people/place_lived/location	/m/0cvw9
/m/0cl0bk	/film/actor/film./film/performance/film	/m/027pfg
/m/04svwx	/film/film/genre	/m/0jxy
/m/06mfvc	/award/award_nominee/award_nominations./award/award_nomination/award	/m/09sb52
/m/03gj2	/olympics/olympic_participating_country/medals_won./olympics/olympic_medal_honor/olympics	/m/0nbjq
/m/0289q	/sports/professional_sports_team/draft_picks./sports/sports_league_draft_pick/draft	/m/09l0x9
/m/02_xgp2	/education/educational_degree/people_with_this_degree./education/education/institution	/m/0gl6x
/m/04fc6c	/base/schemastaging/organization_extra/phone_number./base/schemastaging/phone_sandbox/contact_category	/m/03w5xm
/m/02h4rq6	/education/educational_degree/people_with_this_degree./education/education/institution	/m/01dq0z
/m/0l15f_	/music/performance_role/track_performances./music/track_contribution/role	/m/023r2x
/m/0bs5k8r	/film/film/film_format	/m/0cj16
/m/018grr	/film/actor/film./film/performance/film	/m/04yc76
/m/0fy2s1	/people/person/nationality	/m/03rk0
/m/0cq7tx	/film/film/language	/m/02h40lc
/m/0dgrmp	/sports/sports_position/players./sports/sports_team_roster/team	/m/0f6cl2
/m/0257pw	/award/award_category/winners./award/award_honor/ceremony	/m/019bk0
/m/05p9_ql	/tv/tv_program/regular_cast./tv/regular_tv_appearance/actor	/m/06dn58
/m/01hr1	/film/film/prequel	/m/01hq1
/m/01v1d8	/music/performance_role/track_performances./music/track_contribution/role	/m/01xqw
/m/097zcz	/award/award_winning_work/awards_won./award/award_honor/award_winner	/m/01y8cr
/m/07y8l9	/film/actor/film./film/performance/film	/m/0bv8h2
/m/0bv8h2	/film/film/other_crew./film/film_crew_gig/film_crew_role	/m/03f_s3
/m/0gqz2	/award/award_category/winners./award/award_honor/ceremony	/m/0gmdkyy
/m/026p_bs	/film/film/language	/m/064_8sq
/m/01wz_ml	/music/artist/track_contributions./music/track_contribution/role	/m/06w87
/m/0cc5tgk	/people/person/nationality	/m/0jgd
/m/0bcndz	/award/award_nominated_work/award_nominations./award/award_nomination/nominated_for	/m/0cq7tx
/m/026mmy	/award/award_category/category_of	/m/0c4ys
/m/05lb30	/award/award_nominee/award_nominations./award/award_nomination/award_nominee	/m/05lb65
/m/01tpl1p	/people/person/profession	/m/0np9r
/m/0154j	/military/military_combatant/military_conflicts./military/military_combatant_group/combatants	/m/0f8l9c
/m/027zz	/film/director/film	/m/026p4q7
/m/0154j	/location/location/adjoin_s./location/adjoining_relationship/adjoins	/m/0f8l9c
/m/04vzv4	/award/award_winner/awards_won./award/award_honor/award_winner	/m/05x2t7
/m/02rky4	/organization/endowed_organization/endowment./measurement_unit/dated_money_value/currency	/m/09nqf
/m/01qscs	/base/popstra/celebrity/dated./base/popstra/dated/participant	/m/04bdxl
/m/0sx5w	/people/person/gender	/m/05zppz
/m/0bshwmp	/film/film/estimated_budget./measurement_unit/dated_money_value/currency	/m/09nqf
/m/040b5k	/award/award_winning_work/awards_won./award/award_honor/award	/m/02x258x
/m/0f8l9c	/media_common/netflix_genre/titles	/m/02q6gfp
/m/0cf08	/award/award_nominated_work/award_nominations./award/award_nomination/nominated_for	/m/0140g4
/m/0lccn	/people/person/gender	/m/05zppz
/m/04cw0j	/people/person/gender	/m/05zppz
/m/02m4yg	/education/educational_degree/people_with_this_degree./education/education/institution	/m/014jyk
/m/0mdqp	/people/person/gender	/m/05zppz
/m/0k54q	/film/film/runtime./film/film_cut/film_release_region	/m/0jgd
/m/03nnm4t	/award/award_ceremony/awards_presented./award/award_honor/award_winner	/m/01_x6v
/m/03m3mgq	/people/profession/specialization_of	/m/06q2q
/m/0gtv7pk	/film/film/other_crew./film/film_crew_gig/film_crew_role	/m/0ch6mp2
/m/040b5k	/film/film/release_date_s./film/film_regional_release_date/film_release_region	/m/047yc
/m/0g5rg	/location/location/time_zones	/m/02hcv8
/m/01q_ph	/award/award_nominee/award_nominations./award/award_nomination/nominated_for	/m/0ndsl1x
/m/020_95	/film/actor/film./film/performance/film	/m/0879bpq
/m/0lp_cd3	/award/award_ceremony/awards_presented./award/award_honor/honored_for	/m/07zhjj
/m/09n4nb	/award/award_ceremony/awards_presented./award/award_honor/award_winner	/m/02r4qs
/m/06pj8	/people/person/gender	/m/05zppz
/m/02ywhz	/award/award_ceremony/awards_presented./award/award_honor/award_winner	/m/06pj8
/m/01sby_	/film/film/release_date_s./film/film_regional_release_date/film_release_region	/m/0154j
/m/0bpm4yw	/film/film/release_date_s./film/film_regional_release_date/film_release_region	/m/04gzd
/m/0gx_st	/award/award_ceremony/awards_presented./award/award_honor/award_winner	/m/059j4x
/m/05b4w	/olympics/olympic_participating_country/medals_won./olympics/olympic_medal_honor/olympics	/m/0nbjq
/m/0gj96ln	/film/film/release_date_s./film/film_regional_release_date/film_release_region	/m/015fr
/m/0l14md	/music/performance_role/regular_performances./music/group_membership/group	/m/07bzp
/m/0466k4	/government/politician/government_positions_held./government/government_position_held/basic_title	/m/0p5vf
/m/02qyntr	/award/award_category/nominees./award/award_nomination/nominated_for	/m/08nvyr
/m/09v9mks	/film/film/other_crew./film/film_crew_gig/film_crew_role	/m/09vw2b7
/m/02kxbwx	/film/director/film	/m/011yhm
/m/0408np	/people/person/places_lived./people/place_lived/location	/m/094jv
/m/03sww	/people/person/spouse_s./people/marriage/type_of_union	/m/04ztj
/m/0154j	/olympics/olympic_participating_country/medals_won./olympics/olympic_medal_honor/olympics	/m/0swbd
/m/01rr_d	/education/educational_degree/people_with_this_degree./education/education/institution	/m/01zh3_
/m/032sl_	/award/award_winning_work/awards_won./award/award_honor/award_winner	/m/0147dk
/m/0__wm	/location/location/time_zones	/m/02fqwt
/m/01kff7	/film/film/estimated_budget./measurement_unit/dated_money_value/currency	/m/09nqf
/m/015_30	/award/award_nominee/award_nominations./award/award_nomination/award	/m/05q8pss
/m/09v9mks	/film/film/release_date_s./film/film_regional_release_date/film_release_region	/m/015fr
/m/016tt2	/film/film_distributor/films_distributed./film/film_film_distributor_relationship/film	/m/011ysn
/m/013b2h	/award/award_ceremony/awards_presented./award/award_honor/award_winner	/m/0gbwp
/m/03bxh	/people/person/places_lived./people/place_lived/location	/m/03pbf
/m/04v68c	/people/person/gender	/m/05zppz
/m/04rqd	/broadcast/content/artist	/m/06mj4
/m/03rwz3	/award/award_nominee/award_nominations./award/award_nomination/award_nominee	/m/030_1m
/m/081_zm	/award/award_nominee/award_nominations./award/award_nomination/award_nominee	/m/0f5mdz
/m/01kvrz	/education/university/domestic_tuition./measurement_unit/dated_money_value/currency	/m/09nqf
/m/0gj96ln	/film/film/release_date_s./film/film_regional_release_date/film_release_region	/m/04gzd
/m/0l76z	/award/award_winning_work/awards_won./award/award_honor/award_winner	/m/015c2f
/m/015v3r	/film/actor/film./film/performance/film	/m/01718w
/m/01v0fn1	/award/award_nominee/award_nominations./award/award_nomination/award	/m/0gqz2
/m/09pnw5	/award/award_ceremony/awards_presented./award/award_honor/award_winner	/m/01z7_f
/m/02v703	/award/award_category/winners./award/award_honor/ceremony	/m/013b2h
/m/02t_zq	/people/person/gender	/m/05zppz
/m/016s0m	/people/person/places_lived./people/place_lived/location	/m/01sn3
/m/02cj_f	/people/person/gender	/m/05zppz
/m/06hzq3	/music/genre/artists	/m/03vhvp
/m/05p09zm	/award/award_category/nominees./award/award_nomination/nominated_for	/m/06bd5j
/m/01lyv	/music/genre/artists	/m/025l5
/m/0cwrr	/tv/tv_program/genre	/m/0gg81w
/m/0k1bs	/music/group_member/membership./music/group_membership/role	/m/028tv0
/m/0cc8q3	/base/marchmadness/ncaa_basketball_tournament/seeds./base/marchmadness/ncaa_tournament_seed/team	/m/02pjzvh
/m/04rrx	/location/statistical_region/religions./location/religion_percentage/religion	/m/0c8wxp
/m/019vhk	/film/film/other_crew./film/film_crew_gig/film_crew_role	/m/0dxtw
/m/06c1y	/location/statistical_region/religions./location/religion_percentage/religion	/m/0c8wxp
/m/0g2c8	/organization/organization/headquarters./location/mailing_address/citytown	/m/01sn3
/m/0cf08	/film/film/music	/m/01l9v7n
/m/030hbp	/base/popstra/celebrity/dated./base/popstra/dated/participant	/m/030hcs
/m/07lp1	/influence/influence_node/influenced_by	/m/019z7q
/m/062ftr	/people/person/spouse_s./people/marriage/type_of_union	/m/04ztj
/m/0bkmf	/base/popstra/celebrity/dated./base/popstra/dated/participant	/m/01kgg9
/m/01l78d	/award/award_category/winners./award/award_honor/award_winner	/m/03m9c8
/m/06mfvc	/film/actor/film./film/performance/film	/m/0btbyn
/m/07x4c	/education/educational_institution/colors	/m/019sc
/m/04tng0	/film/film/written_by	/m/026m0
/m/0ccck7	/film/film/estimated_budget./measurement_unit/dated_money_value/currency	/m/09nqf
/m/02lf70	/award/award_winner/awards_won./award/award_honor/award_winner	/m/01l1sq
/m/01qzt1	/music/genre/artists	/m/06mj4
/m/07s9rl0	/media_common/netflix_genre/titles	/m/01y9r2
/m/01hww_	/music/performance_role/regular_performances./music/group_membership/role	/m/0l14j_
/m/01nyl	/location/location/adjoin_s./location/adjoining_relationship/adjoins	/m/01rxw
/m/047myg9	/film/film/genre	/m/07s9rl0
/m/02x4x18	/award/award_category/nominees./award/award_nomination/nominated_for	/m/05c46y6
/m/02vr3gz	/film/film/release_date_s./film/film_regional_release_date/film_release_region	/m/06npd
/m/05sns6	/film/film/estimated_budget./measurement_unit/dated_money_value/currency	/m/09nqf
/m/05n6sq	/film/film/genre	/m/07s9rl0
/m/0h3tv	/base/popstra/location/vacationers./base/popstra/vacation_choice/vacationer	/m/019pm_
/m/0l1pj	/base/biblioness/bibs_location/state	/m/01n7q
/m/0l14gg	/music/genre/artists	/m/012pd4
/m/058vfp4	/award/award_nominee/award_nominations./award/award_nomination/award_nominee	/m/0584j4n
/m/02z0j	/travel/travel_destination/how_to_get_here./travel/transportation/mode_of_transportation	/m/07jdr
/m/0mw89	/location/location/adjoin_s./location/adjoining_relationship/adjoins	/m/0mwx6
/m/025m8y	/award/award_category/winners./award/award_honor/award_winner	/m/02g1jh
/m/059g4	/location/location/contains	/m/0hz35
/m/0h5f5n	/award/award_nominee/award_nominations./award/award_nomination/award	/m/01l78d
/m/01z88t	/military/military_combatant/military_conflicts./military/military_combatant_group/combatants	/m/0d05q4
/m/07s9rl0	/media_common/netflix_genre/titles	/m/05c46y6
/m/015v3r	/award/award_nominee/award_nominations./award/award_nomination/award	/m/0bs0bh
/m/02w4v	/music/genre/artists	/m/016s0m
/m/0cq806	/film/film/genre	/m/07s9rl0
/m/0bqxw	/education/educational_institution/students_graduates./education/education/major_field_of_study	/m/037mh8
/m/01713c	/film/actor/film./film/performance/film	/m/04nl83
/m/02ylg6	/film/film/release_date_s./film/film_regional_release_date/film_release_region	/m/05b4w
/m/0d05w3	/location/location/contains	/m/05gqy
/m/0dgrmp	/sports/sports_position/players./sports/sports_team_roster/team	/m/04mp8x
/m/06yxd	/location/location/adjoin_s./location/adjoining_relationship/adjoins	/m/0f8x_r
/m/0l14j_	/music/performance_role/regular_performances./music/group_membership/role	/m/02sgy
/m/01jb26	/base/popstra/celebrity/dated./base/popstra/dated/participant	/m/021yw7
/m/03zqc1	/award/award_nominee/award_nominations./award/award_nomination/award_nominee	/m/05lb30
/m/0cq86w	/film/film/genre	/m/07s9rl0
/m/0g2c8	/award/hall_of_fame/inductees./award/hall_of_fame_induction/inductee	/m/0394y
/m/04ztj	/people/marriage_union_type/unions_of_this_type./people/marriage/location_of_ceremony	/m/0wh3
/m/045j3w	/film/film/release_date_s./film/film_regional_release_date/film_release_region	/m/05qhw
/m/03k7bd	/people/person/spouse_s./people/marriage/type_of_union	/m/04ztj
/m/01cpqk	/people/person/spouse_s./people/marriage/type_of_union	/m/04ztj
/m/0d29z	/people/ethnicity/geographic_distribution	/m/07f1x
/m/02grjf	/organization/organization/headquarters./location/mailing_address/state_province_region	/m/04rrx
/m/01vd7hn	/award/award_nominee/award_nominations./award/award_nomination/award_nominee	/m/0jdhp
/m/01vrlr4	/award/award_nominee/award_nominations./award/award_nomination/award	/m/01l29r
/m/01mqnr	/award/award_nominee/award_nominations./award/award_nomination/award	/m/09qvc0
/m/03wj4r8	/film/film/other_crew./film/film_crew_gig/film_crew_role	/m/0ch6mp2
/m/02vtnf	/award/award_nominee/award_nominations./award/award_nomination/award_nominee	/m/036jb
/m/07jnt	/film/film/genre	/m/01rbb
/m/04wtx1	/people/person/profession	/m/0dxtg
/m/0209hj	/award/award_winning_work/awards_won./award/award_honor/award	/m/0gs96
/m/014zz1	/music/performance_role/regular_performances./music/group_membership/role	/m/02sgy
/m/01r4hry	/award/award_nominee/award_nominations./award/award_nomination/nominated_for	/m/013q07
/m/0c3351	/media_common/netflix_genre/titles	/m/04ddm4
/m/02s2lg	/soccer/football_team/current_roster./soccer/football_roster_position/position	/m/0dgrmp
/m/01g42	/award/award_nominee/award_nominations./award/award_nomination/nominated_for	/m/0qmfz
/m/044zvm	/film/actor/film./film/performance/film	/m/0pvms
/m/0127xk	/award/award_nominee/award_nominations./award/award_nomination/award	/m/0bp_b2
/m/01hq1	/film/film/other_crew./film/film_crew_gig/crewmember	/m/03r1pr
/m/0319l	/music/performance_role/track_performances./music/track_contribution/role	/m/0979zs
/m/04ztj	/people/marriage_union_type/unions_of_this_type./people/marriage/location_of_ceremony	/m/01f62
/m/0175tv	/soccer/football_team/current_roster./soccer/football_roster_position/position	/m/0dgrmp
/m/015fr	/location/location/adjoin_s./location/adjoining_relationship/adjoins	/m/07ylj
/m/0fhpv4	/award/award_category/nominees./award/award_nomination/nominated_for	/m/011xg5
/m/0343h	/people/person/employment_history./business/employment_tenure/company	/m/0kx4m
/m/09f6b	/olympics/olympic_sport/athletes./olympics/olympic_athlete_affiliation/country	/m/0jgd
/m/03rhqg	/music/record_label/artist	/m/0c9d9
/m/01ps2h8	/award/award_winner/awards_won./award/award_honor/award_winner	/m/09wj5
/m/0czp_	/award/award_category/winners./award/award_honor/ceremony	/m/0fv89q
/m/03kq98	/tv/tv_program/regular_cast./tv/regular_tv_appearance/actor	/m/01gvr1
/m/0h7pj	/film/actor/film./film/performance/film	/m/01_1hw
/m/022p06	/award/award_nominee/award_nominations./award/award_nomination/award	/m/054ky1
/m/07swvb	/award/award_nominee/award_nominations./award/award_nomination/nominated_for	/m/05pdh86
/m/049w1q	/film/film/release_date_s./film/film_regional_release_date/film_release_region	/m/07dfk
/m/03xq0f	/film/film_distributor/films_distributed./film/film_film_distributor_relationship/film	/m/04jm_hq
/m/09wj5	/award/award_nominee/award_nominations./award/award_nomination/award_nominee	/m/0f0kz
/m/01693z	/music/artist/track_contributions./music/track_contribution/role	/m/02sgy
/m/0f0kz	/film/actor/film./film/performance/film	/m/03wh49y
/m/01z27	/olympics/olympic_sport/athletes./olympics/olympic_athlete_affiliation/country	/m/0chghy
/m/01wg6y	/music/artist/track_contributions./music/track_contribution/role	/m/01vdm0
/m/02l4pj	/award/award_nominee/award_nominations./award/award_nomination/award_nominee	/m/02mt4k
/m/0gj9qxr	/film/film/other_crew./film/film_crew_gig/film_crew_role	/m/0ch6mp2
/m/07hwkr	/people/ethnicity/people	/m/0k9j_
/m/027f7dj	/award/award_winner/awards_won./award/award_honor/award_winner	/m/01gvr1
/m/0f8l9c	/location/statistical_region/gni_per_capita_in_ppp_dollars./measurement_unit/dated_money_value/currency	/m/09nqf
/m/01qbg5	/award/award_winning_work/awards_won./award/award_honor/honored_for	/m/02k_4g
/m/07fvf1	/award/award_nominee/award_nominations./award/award_nomination/award_nominee	/m/03q45x
/m/02ck7w	/film/actor/film./film/performance/film	/m/017gl1
/m/0584j4n	/people/deceased_person/place_of_death	/m/030qb3t
/m/02qvhbb	/people/person/profession	/m/0dxtg
/m/0gkg6	/people/person/spouse_s./people/marriage/type_of_union	/m/04ztj
/m/09d3b7	/award/award_winning_work/awards_won./award/award_honor/award	/m/054krc
/m/0qmk5	/tv/tv_program/genre	/m/0vgkd
/m/0b_dy	/film/actor/film./film/performance/film	/m/02x6dqb
/m/0275n3y	/award/award_ceremony/awards_presented./award/award_honor/honored_for	/m/04p5cr
/m/0jm74	/sports/professional_sports_team/draft_picks./sports/sports_league_draft_pick/draft	/m/09th87
/m/019803	/film/actor/film./film/performance/film	/m/0k2sk
/m/0265v21	/award/award_nominee/award_nominations./award/award_nomination/award_nominee	/m/025vl4m
/m/017xm3	/people/person/spouse_s./people/marriage/type_of_union	/m/04ztj
/m/06dv3	/film/actor/film./film/performance/film	/m/0cz_ym
/m/015_30	/award/award_nominee/award_nominations./award/award_nomination/award	/m/01bgqh
/m/04sry	/award/award_nominee/award_nominations./award/award_nomination/award	/m/040njc
/m/0lbbj	/user/jg/default_domain/olympic_games/sports	/m/0bynt
/m/0c40vxk	/film/film/release_date_s./film/film_regional_release_date/film_release_region	/m/0jgx
/m/0m313	/award/award_winning_work/awards_won./award/award_honor/award	/m/09sb52
/m/0b7l4x	/film/film/other_crew./film/film_crew_gig/film_crew_role	/m/02y6fz
/m/027pfg	/film/film/release_date_s./film/film_regional_release_date/film_release_region	/m/05qhw
/m/01mqnr	/people/person/gender	/m/05zppz
/m/01jsn5	/organization/endowed_organization/endowment./measurement_unit/dated_money_value/currency	/m/09nqf
/m/014v6f	/people/person/gender	/m/05zppz
/m/02l101	/award/award_nominee/award_nominations./award/award_nomination/award	/m/0bdwqv
/m/032sl_	/film/film/estimated_budget./measurement_unit/dated_money_value/currency	/m/09nqf
/m/0m313	/film/film/genre	/m/04xvh5
/m/016tt2	/award/award_nominee/award_nominations./award/award_nomination/nominated_for	/m/03bdkd
/m/083chw	/people/person/profession	/m/0dxtg
/m/06q07	/organization/organization/headquarters./location/mailing_address/citytown	/m/024bqj
/m/0b2km_	/film/film/film_format	/m/07fb8_
/m/04wp2p	/people/person/gender	/m/05zppz
/m/0l76z	/tv/tv_program/genre	/m/05p553
/m/02pptm	/organization/organization/headquarters./location/mailing_address/state_province_region	/m/01n7q
/m/0mdqp	/influence/influence_node/influenced_by	/m/014z8v
/m/0gs7x	/people/deceased_person/place_of_death	/m/05qtj
/m/03s9kp	/film/film/language	/m/064_8sq
/m/01cmp9	/award/award_winning_work/awards_won./award/award_honor/award_winner	/m/02qgyv
/m/01tw31	/music/group_member/membership./music/group_membership/role	/m/028tv0
/m/01b_lz	/award/award_winning_work/awards_won./award/award_honor/award_winner	/m/0427y
/m/02p8v8	/people/person/spouse_s./people/marriage/type_of_union	/m/04ztj
/m/083chw	/award/award_nominee/award_nominations./award/award_nomination/award_nominee	/m/0cj36c
/m/0168ql	/people/person/profession	/m/0np9r
/m/016gkf	/award/award_nominee/award_nominations./award/award_nomination/award	/m/0789_m
/m/0dckvs	/film/film/release_date_s./film/film_regional_release_date/film_release_region	/m/0154j
/m/0f_y9	/people/person/profession	/m/05z96
/m/042xrr	/people/person/gender	/m/05zppz
/m/01jw4r	/film/actor/film./film/performance/film	/m/0bdjd
/m/0hx4y	/film/film/release_date_s./film/film_regional_release_date/film_release_region	/m/0f8l9c
/m/03jldb	/people/person/places_lived./people/place_lived/location	/m/0s9z_
/m/019pm_	/film/actor/film./film/performance/film	/m/051zy_b
/m/0579tg2	/award/award_nominee/award_nominations./award/award_nomination/nominated_for	/m/0bcndz
/m/04ztj	/people/marriage_union_type/unions_of_this_type./people/marriage/location_of_ceremony	/m/0f0sbl
/m/05th8t	/award/award_nominee/award_nominations./award/award_nomination/award_nominee	/m/07s8r0
/m/03nt7j	/sports/sports_league_draft/picks./sports/sports_league_draft_pick/school	/m/01hx2t
/m/02p65p	/award/award_nominee/award_nominations./award/award_nomination/award_nominee	/m/016vg8
/m/01sn3	/location/location/time_zones	/m/02hcv8
/m/04smkr	/award/award_winner/awards_won./award/award_honor/award_winner	/m/0b_dy
/m/07s9rl0	/media_common/netflix_genre/titles	/m/0170xl
/m/01jft4	/film/film/executive_produced_by	/m/04l3_z
/m/0372p	/people/person/profession	/m/06q2q
/m/07swvb	/award/award_nominee/award_nominations./award/award_nomination/nominated_for	/m/03c7twt
/m/0160w	/location/statistical_region/gni_per_capita_in_ppp_dollars./measurement_unit/dated_money_value/currency	/m/09nqf
/m/0266r6h	/film/actor/film./film/performance/film	/m/0gvvf4j
/m/0gz6b6g	/film/film/distributors./film/film_film_distributor_relationship/region	/m/06m_5
/m/04chyn	/education/educational_institution/students_graduates./education/education/major_field_of_study	/m/0g26h
/m/0gk4g	/people/cause_of_death/people	/m/01g42
/m/014mlp	/education/educational_degree/people_with_this_degree./education/education/major_field_of_study	/m/01lj9
/m/040b5k	/film/film/genre	/m/07s9rl0
/m/014mlp	/education/educational_degree/people_with_this_degree./education/education/student	/m/0bqs56
/m/0qm9n	/award/award_winning_work/awards_won./award/award_honor/award_winner	/m/0h1nt
/m/06z6r	/olympics/olympic_sport/athletes./olympics/olympic_athlete_affiliation/country	/m/03rk0
/m/0mp3l	/location/statistical_region/rent50_2./measurement_unit/dated_money_value/currency	/m/09nqf
/m/0bj25	/film/film/production_companies	/m/016tt2
/m/02k_4g	/award/award_winning_work/awards_won./award/award_honor/award	/m/0bp_b2
/m/02sgy	/music/performance_role/track_performances./music/track_contribution/role	/m/0979zs
/m/05p09dd	/film/film/language	/m/02h40lc
/m/05qhw	/military/military_combatant/military_conflicts./military/military_combatant_group/combatants	/m/02psqkz
/m/01ggbx	/award/award_nominee/award_nominations./award/award_nomination/award	/m/0b6k___
/m/06w2yp9	/award/award_nominee/award_nominations./award/award_nomination/award_nominee	/m/04y79_n
/m/06vnh2	/people/person/gender	/m/05zppz
/m/04fgzb0	/award/award_category/winners./award/award_honor/ceremony	/m/0jt3qpk
/m/0401sg	/film/film/language	/m/02h40lc
/m/0dyb1	/film/film/release_date_s./film/film_regional_release_date/film_release_region	/m/05b4w
/m/01b1mj	/organization/endowed_organization/endowment./measurement_unit/dated_money_value/currency	/m/09nqf
/m/062ftr	/award/award_nominee/award_nominations./award/award_nomination/award_nominee	/m/08hsww
/m/02b0yz	/soccer/football_team/current_roster./sports/sports_team_roster/position	/m/0dgrmp
/m/0hmr4	/award/award_winning_work/awards_won./award/award_honor/award	/m/02rdxsh
/m/03rhqg	/music/record_label/artist	/m/04s5_s
/m/0yvjx	/location/location/time_zones	/m/02hcv8
/m/03gj2	/location/location/adjoin_s./location/adjoining_relationship/adjoins	/m/06npd
/m/02q5xsx	/people/person/gender	/m/05zppz
/m/0fqt1ns	/film/film/other_crew./film/film_crew_gig/film_crew_role	/m/0dxtw
/m/02knxx	/people/cause_of_death/people	/m/0bs8d
/m/0716b6	/influence/influence_node/influenced_by	/m/0fpzzp
/m/0d8lm	/music/performance_role/regular_performances./music/group_membership/role	/m/0l14md
/m/0h5f5n	/award/award_nominee/award_nominations./award/award_nomination/award	/m/0gr4k
/m/036hf4	/award/award_nominee/award_nominations./award/award_nomination/award	/m/05zvj3m
/m/0399p	/influence/influence_node/influenced_by	/m/0372p
/m/03ryks	/music/artist/track_contributions./music/track_contribution/role	/m/01xqw
/m/09kn9	/tv/tv_program/regular_cast./tv/regular_tv_appearance/actor	/m/03xkps
/m/0bynt	/olympics/olympic_sport/athletes./olympics/olympic_athlete_affiliation/country	/m/0d05q4
/m/028tv0	/music/performance_role/regular_performances./music/group_membership/group	/m/0143q0
/m/027tbrc	/tv/tv_program/languages	/m/02h40lc
/m/040p3y	/soccer/football_team/current_roster./soccer/football_roster_position/position	/m/0dgrmp
/m/06c1y	/military/military_combatant/military_conflicts./military/military_combatant_group/combatants	/m/07f1x
/m/0g54xkt	/film/film/genre	/m/03bxz7
/m/0f9rw9	/base/marchmadness/ncaa_basketball_tournament/seeds./base/marchmadness/ncaa_tournament_seed/team	/m/03d555l
/m/03s6l2	/film/film/other_crew./film/film_crew_gig/film_crew_role	/m/0ch6mp2
/m/0x67	/people/ethnicity/people	/m/014g_s
/m/051zy_b	/film/film/featured_film_locations	/m/0r2kh
/m/09sdmz	/award/award_category/nominees./award/award_nomination/nominated_for	/m/017gl1
/m/0jyx6	/award/award_winning_work/awards_won./award/award_honor/award	/m/040njc
/m/03qlv7	/music/performance_role/guest_performances./music/recording_contribution/performance_role	/m/023r2x
/m/04j689	/soccer/football_team/current_roster./soccer/football_roster_position/position	/m/0dgrmp
/m/048scx	/award/award_winning_work/awards_won./award/award_honor/award_winner	/m/04cy8rb
/m/06bw5	/education/university/local_tuition./measurement_unit/dated_money_value/currency	/m/09nqf
/m/028tv0	/music/performance_role/track_performances./music/track_contribution/role	/m/02sgy
/m/0193qj	/military/military_combatant/military_conflicts./military/military_combatant_group/combatants	/m/06npd
/m/0gr4k	/award/award_category/nominees./award/award_nomination/nominated_for	/m/05qm9f
/m/044p4_	/sports/sports_team/colors	/m/019sc
/m/02bvt	/people/person/religion	/m/0c8wxp
/m/02mt4k	/award/award_nominee/award_nominations./award/award_nomination/nominated_for	/m/01cmp9
/m/01gstn	/government/legislative_session/members./government/government_position_held/legislative_sessions	/m/01gsrl
/m/04kxsb	/award/award_category/nominees./award/award_nomination/nominated_for	/m/0sxns
/m/06r2_	/film/film/other_crew./film/film_crew_gig/film_crew_role	/m/0ch6mp2
/m/0jgd	/olympics/olympic_participating_country/medals_won./olympics/olympic_medal_honor/olympics	/m/0lbd9
/m/02w29z	/award/award_nominee/award_nominations./award/award_nomination/award_nominee	/m/06dv3
/m/04t36	/media_common/netflix_genre/titles	/m/01gvpz
/m/01v42g	/people/person/spouse_s./people/marriage/type_of_union	/m/04ztj
/m/05r5w	/base/popstra/celebrity/canoodled./base/popstra/canoodled/participant	/m/02qjj7
/m/0crx5w	/award/award_winner/awards_won./award/award_honor/award_winner	/m/02wk_43
/m/01jq4b	/education/educational_institution/students_graduates./education/education/major_field_of_study	/m/01jzxy
/m/019pm_	/award/award_nominee/award_nominations./award/award_nomination/award_nominee	/m/08swgx
/m/072hx4	/film/film/release_date_s./film/film_regional_release_date/film_release_region	/m/06t2t
/m/084qpk	/film/film/produced_by	/m/06cv1
/m/031n8c	/business/business_operation/assets./measurement_unit/dated_money_value/currency	/m/09nqf
/m/0210hf	/award/award_nominee/award_nominations./award/award_nomination/award_nominee	/m/01tvz5j
/m/01n4w_	/education/university/local_tuition./measurement_unit/dated_money_value/currency	/m/09nqf
/m/0mbwf	/organization/endowed_organization/endowment./measurement_unit/dated_money_value/currency	/m/0ptk_
/m/029b9k	/award/award_nominee/award_nominations./award/award_nomination/award	/m/09qj50
/m/0gx9rvq	/film/film/release_date_s./film/film_regional_release_date/film_release_region	/m/015fr
/m/040njc	/award/award_category/nominees./award/award_nomination/nominated_for	/m/011yph
/m/012mrr	/award/award_winning_work/awards_won./award/award_honor/award_winner	/m/06pj8
/m/03bx2lk	/film/film/release_date_s./film/film_regional_release_date/film_release_region	/m/0b90_r
/m/0713r	/sports/professional_sports_team/draft_picks./sports/sports_league_draft_pick/school	/m/01j_06
/m/077q8x	/film/film/release_date_s./film/film_regional_release_date/film_release_region	/m/0jgd
/m/06dn58	/award/award_nominee/award_nominations./award/award_nomination/award_nominee	/m/02l6dy
/m/01ffx4	/film/film/release_date_s./film/film_regional_release_date/film_release_region	/m/0154j
/m/01w3v	/education/educational_institution/students_graduates./education/education/student	/m/049gc
/m/017jd9	/film/film/release_date_s./film/film_regional_release_date/film_release_region	/m/06t2t
/m/02bjhv	/education/educational_institution/students_graduates./education/education/major_field_of_study	/m/02lp1
/m/0h1nt	/award/award_nominee/award_nominations./award/award_nomination/award_nominee	/m/0fthdk
/m/0dv1hh	/people/person/gender	/m/05zppz
/m/0g8st4	/award/award_nominee/award_nominations./award/award_nomination/award_nominee	/m/07s8r0
/m/04p5cr	/award/award_winning_work/awards_won./award/award_honor/award	/m/0gkr9q
/m/04h68j	/award/award_nominee/award_nominations./award/award_nomination/award_nominee	/m/02q5xsx
/m/028tv0	/music/performance_role/regular_performances./music/group_membership/role	/m/01qbl
/m/02bj6k	/award/award_nominee/award_nominations./award/award_nomination/award	/m/0bdwqv
/m/025ts_z	/film/film/release_date_s./film/film_regional_release_date/film_release_region	/m/03gj2
/m/0979zs	/music/performance_role/track_performances./music/track_contribution/role	/m/0gkd1
/m/03xkps	/award/award_nominee/award_nominations./award/award_nomination/award_nominee	/m/08cn4_
/m/04nl83	/film/film/other_crew./film/film_crew_gig/film_crew_role	/m/09vw2b7
/m/0cwrr	/tv/tv_program/languages	/m/02h40lc
/m/0gr4k	/award/award_category/winners./award/award_honor/award_winner	/m/06kxk2
/m/01gp_x	/award/award_nominee/award_nominations./award/award_nomination/nominated_for	/m/07g9f
/m/027hjff	/award/award_ceremony/awards_presented./award/award_honor/award_winner	/m/072bb1
/m/01738w	/film/film/other_crew./film/film_crew_gig/film_crew_role	/m/0dxtw
/m/0mgkg	/organization/organization/headquarters./location/mailing_address/citytown	/m/0d9jr
/m/026p4q7	/film/film/genre	/m/07s9rl0
/m/03h_9lg	/film/actor/film./film/performance/film	/m/084302
/m/0dgrmp	/sports/sports_position/players./sports/sports_team_roster/team	/m/01352_
/m/0bmfnjs	/film/film/release_date_s./film/film_regional_release_date/film_release_region	/m/03gj2
/m/02g1jh	/people/person/profession	/m/01c72t
/m/0gfsq9	/film/film/genre	/m/07s9rl0
/m/076xkps	/film/film/other_crew./film/film_crew_gig/film_crew_role	/m/09vw2b7
/m/02t_8z	/award/award_winner/awards_won./award/award_honor/award_winner	/m/055sjw
/m/01b9ck	/award/award_nominee/award_nominations./award/award_nomination/award_nominee	/m/016tt2
/m/0mkg	/music/performance_role/regular_performances./music/group_membership/role	/m/0192l
/m/0ccd3x	/film/film/film_festivals	/m/059_y8d
/m/032wdd	/people/person/languages	/m/02h40lc
/m/05sns6	/film/film/genre	/m/02l7c8
/m/07c72	/award/award_winning_work/awards_won./award/award_honor/award_winner	/m/0cjdk
/m/09gdm7q	/film/film/release_date_s./film/film_regional_release_date/film_release_region	/m/0b90_r
/m/05fjy	/location/statistical_region/religions./location/religion_percentage/religion	/m/0c8wxp
/m/0chghy	/location/statistical_region/gdp_nominal_per_capita./measurement_unit/dated_money_value/currency	/m/09nqf
/m/0by17xn	/film/film/release_date_s./film/film_regional_release_date/film_release_region	/m/0154j
/m/043djx	/government/legislative_session/members./government/government_position_held/legislative_sessions	/m/01gst_
/m/02bfmn	/award/award_nominee/award_nominations./award/award_nomination/award_nominee	/m/02ck7w
/m/01w3v	/education/educational_institution/students_graduates./education/education/major_field_of_study	/m/02h40lc
/m/031vy_	/education/educational_institution/students_graduates./education/education/student	/m/0djc3s
/m/049l7	/award/award_nominee/award_nominations./award/award_nomination/award	/m/040njc
/m/0p_pd	/people/person/religion	/m/0c8wxp
/m/0jqn5	/film/film/release_date_s./film/film_regional_release_date/film_release_region	/m/05qhw
/m/02vl9ln	/film/film/country	/m/0f8l9c
/m/0dgrmp	/sports/sports_position/players./sports/sports_team_roster/team	/m/03dj6y
/m/015fr	/olympics/olympic_participating_country/medals_won./olympics/olympic_medal_honor/olympics	/m/0jhn7
/m/03rtmz	/government/legislative_session/members./government/government_position_held/district_represented	/m/050l8
/m/04dn09n	/award/award_category/nominees./award/award_nomination/nominated_for	/m/016ks5
/m/01l8t8	/organization/endowed_organization/endowment./measurement_unit/dated_money_value/currency	/m/09nqf
/m/02633g	/people/person/spouse_s./people/marriage/type_of_union	/m/04ztj
/m/059x66	/award/award_ceremony/awards_presented./award/award_honor/award_winner	/m/027kmrb
/m/05vsxz	/award/award_nominee/award_nominations./award/award_nomination/award_nominee	/m/05yh_t
/m/01xhh5	/people/ethnicity/geographic_distribution	/m/0d05w3
/m/042xrr	/award/award_winner/awards_won./award/award_honor/award_winner	/m/0169dl
/m/05c0jwl	/organization/role/leaders./organization/leadership/organization	/m/07tl0
/m/08gsvw	/film/film/other_crew./film/film_crew_gig/film_crew_role	/m/09vw2b7
/m/06rmdr	/film/film/produced_by	/m/03ktjq
/m/0f2c8g	/people/person/profession	/m/0dxtg
/m/0487_	/sports/sports_team/roster./american_football/football_roster_position/position	/m/05zm34
/m/02l6dy	/award/award_nominee/award_nominations./award/award_nomination/award	/m/09sb52
/m/0db94w	/film/film/release_date_s./film/film_regional_release_date/film_release_region	/m/0jgd
/m/013yq	/travel/travel_destination/climate./travel/travel_destination_monthly_climate/month	/m/02xx5
/m/0crlz	/olympics/olympic_sport/athletes./olympics/olympic_athlete_affiliation/olympics	/m/0lbd9
/m/04g9gd	/film/film/other_crew./film/film_crew_gig/film_crew_role	/m/0ch6mp2
/m/05k2s_	/people/person/spouse_s./people/marriage/type_of_union	/m/04ztj
/m/0cqhb3	/award/award_category/nominees./award/award_nomination/nominated_for	/m/07g9f
/m/02zfdp	/award/award_nominee/award_nominations./award/award_nomination/award_nominee	/m/02bfmn
/m/02b0y3	/soccer/football_team/current_roster./soccer/football_roster_position/position	/m/03f0fp
/m/01p970	/music/performance_role/track_performances./music/track_contribution/role	/m/01vdm0
/m/0gzlb9	/film/film/other_crew./film/film_crew_gig/film_crew_role	/m/0dxtw
/m/0kx4m	/award/award_winner/awards_won./award/award_honor/award_winner	/m/0343h
/m/0k1bs	/people/person/religion	/m/0c8wxp
/m/01xqw	/music/performance_role/regular_performances./music/group_membership/role	/m/0l14md
/m/04j13sx	/film/film/other_crew./film/film_crew_gig/film_crew_role	/m/01pvkk
/m/02ktrs	/award/award_nominee/award_nominations./award/award_nomination/award	/m/09sb52
/m/040_9	/people/person/nationality	/m/05qhw
/m/02g9p4	/music/performance_role/track_performances./music/track_contribution/role	/m/0l14j_
/m/02f_k_	/film/actor/film./film/performance/film	/m/08fn5b
/m/0k4bc	/film/film/featured_film_locations	/m/0cc65
/m/04kxsb	/award/award_category/nominees./award/award_nomination/nominated_for	/m/0hmr4
/m/0bp_b2	/award/award_category/winners./award/award_honor/ceremony	/m/0bxs_d
/m/08966	/travel/travel_destination/climate./travel/travel_destination_monthly_climate/month	/m/02xx5
/m/018mxj	/base/schemastaging/organization_extra/phone_number./base/schemastaging/phone_sandbox/service_location	/m/05qhw
/m/011yxg	/film/film/genre	/m/05p553
/m/0484q	/people/person/profession	/m/0n1h
/m/02js9p	/award/award_winner/awards_won./award/award_honor/award_winner	/m/019pm_
/m/0fpkhkz	/film/film/release_date_s./film/film_regional_release_date/film_release_region	/m/06c1y
/m/01dw4q	/award/award_winner/awards_won./award/award_honor/award_winner	/m/05lb30
/m/0121rx	/people/person/gender	/m/05zppz
/m/03mcwq3	/award/award_nominee/award_nominations./award/award_nomination/award_nominee	/m/0807ml
/m/0140t7	/award/award_nominee/award_nominations./award/award_nomination/award	/m/0gqz2
/m/0blbxk	/award/award_nominee/award_nominations./award/award_nomination/award_nominee	/m/0509bl
/m/09tkzy	/film/film/genre	/m/02l7c8
/m/01w02sy	/people/person/places_lived./people/place_lived/location	/m/02cft
/m/07q1v4	/award/award_nominee/award_nominations./award/award_nomination/award	/m/054krc
/m/0bn9sc	/soccer/football_player/current_team./sports/sports_team_roster/team	/m/03fhml
/m/0202p_	/people/person/gender	/m/05zppz
/m/02l9wl	/education/educational_institution/students_graduates./education/education/student	/m/03xk1_
/m/015_30	/people/person/profession	/m/016z4k
/m/08c6k9	/film/film/other_crew./film/film_crew_gig/film_crew_role	/m/0ch6mp2
/m/02knxx	/people/cause_of_death/people	/m/01c1px
/m/0bp_b2	/award/award_category/category_of	/m/0gcf2r
/m/0j298t8	/award/award_category/nominees./award/award_nomination/nominated_for	/m/0bs5k8r
/m/048lv	/award/award_nominee/award_nominations./award/award_nomination/award	/m/0bdwqv
/m/04ztj	/people/marriage_union_type/unions_of_this_type./people/marriage/location_of_ceremony	/m/01bkb
/m/03wh8kl	/award/award_nominee/award_nominations./award/award_nomination/award_nominee	/m/02wk_43
/m/02bj6k	/award/award_nominee/award_nominations./award/award_nomination/award	/m/0bfvd4
/m/01738w	/film/film/music	/m/023361
/m/01t9_0	/film/film_distributor/films_distributed./film/film_film_distributor_relationship/film	/m/0k54q
/m/07swvb	/film/actor/film./film/performance/film	/m/03c7twt
/m/03ryks	/music/artist/track_contributions./music/track_contribution/role	/m/02sgy
/m/0pc62	/award/award_winning_work/awards_won./award/award_honor/award_winner	/m/04ktcgn
/m/01vvb4m	/award/award_nominee/award_nominations./award/award_nomination/award	/m/05p09zm
/m/01pjr7	/people/person/spouse_s./people/marriage/type_of_union	/m/04ztj
/m/02rjz5	/sports/sports_team/colors	/m/019sc
/m/0h7x	/location/location/adjoin_s./location/adjoining_relationship/adjoins	/m/06npd
/m/0cm2xh	/military/military_conflict/combatants./military/military_combatant_group/combatants	/m/0chghy
/m/01w02sy	/people/person/places_lived./people/place_lived/location	/m/0c4kv
/m/02tv80	/film/actor/film./film/performance/film	/m/01b195
/m/0gy0l_	/film/film/other_crew./film/film_crew_gig/film_crew_role	/m/0ch6mp2
/m/05bp8g	/people/person/place_of_birth	/m/07dfk
/m/01n4w_	/business/business_operation/revenue./measurement_unit/dated_money_value/currency	/m/09nqf
/m/0b4lkx	/film/film/film_format	/m/0cj16
/m/0l14qv	/music/performance_role/track_performances./music/track_contribution/role	/m/0l14md
/m/0401sg	/film/film/release_date_s./film/film_regional_release_date/film_release_region	/m/06t2t
/m/045zr	/award/award_nominee/award_nominations./award/award_nomination/award_nominee	/m/0197tq
/m/029tx	/media_common/netflix_genre/titles	/m/0hx4y
/m/040j2_	/people/person/gender	/m/05zppz
/m/07jqjx	/film/film/country	/m/0f8l9c
/m/073w14	/film/actor/film./film/performance/film	/m/011ysn
/m/04kxsb	/award/award_category/nominees./award/award_nomination/nominated_for	/m/02p86pb
/m/0515zg	/soccer/football_team/current_roster./soccer/football_roster_position/position	/m/0dgrmp
/m/0jqn5	/film/film/release_date_s./film/film_regional_release_date/film_release_region	/m/0154j
/m/02pzck	/award/award_nominee/award_nominations./award/award_nomination/award	/m/05p09zm
/m/0sxrz	/olympics/olympic_games/sports	/m/0crlz
/m/06929s	/film/film/language	/m/02h40lc
/m/04yj5z	/people/person/spouse_s./people/marriage/type_of_union	/m/04ztj
/m/019vsw	/education/educational_institution/students_graduates./education/education/student	/m/063t3j
/m/0dgrmp	/sports/sports_position/players./sports/sports_team_roster/team	/m/047g98
/m/05sq84	/award/award_nominee/award_nominations./award/award_nomination/award	/m/04kxsb
/m/010xjr	/award/award_nominee/award_nominations./award/award_nomination/award	/m/09sb52
/m/09qvc0	/award/award_category/nominees./award/award_nomination/nominated_for	/m/05p9_ql
/m/01w40h	/music/record_label/artist	/m/0dw4g
/m/02r858_	/film/film/language	/m/02h40lc
/m/01k_mc	/award/award_nominee/award_nominations./award/award_nomination/award	/m/01cw51
/m/0cz_ym	/film/film/other_crew./film/film_crew_gig/film_crew_role	/m/09vw2b7
/m/01r4bps	/people/person/spouse_s./people/marriage/type_of_union	/m/04ztj
/m/07r4c	/music/artist/track_contributions./music/track_contribution/role	/m/0l14qv
/m/059g4	/location/location/partially_contains	/m/0f8l9c
/m/015dqj	/film/actor/film./film/performance/film	/m/0n0bp
/m/0k419	/film/film/costume_design_by	/m/02cqbx
/m/0kbg6	/people/person/gender	/m/05zppz
/m/0399p	/people/person/gender	/m/05zppz
/m/01h910	/people/person/gender	/m/05zppz
/m/01q940	/organization/organization/headquarters./location/mailing_address/citytown	/m/0chgzm
/m/014mlp	/education/educational_degree/people_with_this_degree./education/education/student	/m/0crx5w
/m/017z88	/education/educational_institution/students_graduates./education/education/student	/m/02_jkc
/m/02q_4ph	/film/film/featured_film_locations	/m/01bkb
/m/0160w	/location/statistical_region/gdp_nominal_per_capita./measurement_unit/dated_money_value/currency	/m/09nqf
/m/06pcz0	/people/person/gender	/m/05zppz
/m/01nfys	/award/award_winner/awards_won./award/award_honor/award_winner	/m/0755wz
/m/03zqc1	/award/award_nominee/award_nominations./award/award_nomination/award_nominee	/m/01dw4q
/m/0jhn7	/user/jg/default_domain/olympic_games/sports	/m/0d1tm
/m/018c_r	/business/business_operation/revenue./measurement_unit/dated_money_value/currency	/m/09nqf
/m/01v9l67	/award/award_nominee/award_nominations./award/award_nomination/award_nominee	/m/0154qm
/m/01v1d8	/music/performance_role/track_performances./music/track_contribution/role	/m/0gkd1
/m/0dtzkt	/film/film/music	/m/0lccn
/m/043tz8m	/american_football/football_team/current_roster./sports/sports_team_roster/position	/m/04nfpk
/m/02kk_c	/award/award_winning_work/awards_won./award/award_honor/award_winner	/m/0g2lq
/m/0q9b0	/film/film/estimated_budget./measurement_unit/dated_money_value/currency	/m/09nqf
/m/05rznz	/location/country/official_language	/m/02h40lc
/m/06kxk2	/award/award_nominee/award_nominations./award/award_nomination/award	/m/0gr4k
/m/08x5c_	/film/actor/film./film/performance/film	/m/029v40
/m/0bth54	/film/film/other_crew./film/film_crew_gig/film_crew_role	/m/0n1h
/m/024tj	/award/award_nominee/award_nominations./award/award_nomination/award	/m/040njc
/m/06npd	/location/statistical_region/gdp_nominal_per_capita./measurement_unit/dated_money_value/currency	/m/09nqf
/m/0gd92	/award/award_winning_work/awards_won./award/award_honor/award	/m/02x8n1n
/m/09rp4r_	/people/person/gender	/m/05zppz
/m/0fkh6	/location/statistical_region/rent50_2./measurement_unit/dated_money_value/currency	/m/09nqf
/m/0db94w	/film/film/release_date_s./film/film_regional_release_date/film_release_region	/m/07f1x
/m/01l7qw	/people/person/gender	/m/05zppz
/m/023zl	/education/educational_institution/students_graduates./education/education/major_field_of_study	/m/0g26h
/m/0ftf0f	/sports/sports_team/roster./american_football/football_roster_position/position	/m/05zm34
/m/071t0	/olympics/olympic_sport/athletes./olympics/olympic_athlete_affiliation/country	/m/06qd3
/m/01s9ftn	/people/person/profession	/m/0np9r
/m/01hww_	/music/performance_role/track_performances./music/track_contribution/role	/m/02sgy
/m/03cv_gy	/tv/tv_program/regular_cast./tv/regular_tv_appearance/actor	/m/02s5v5
/m/04wp3s	/people/person/languages	/m/02h40lc
/m/05vtbl	/people/person/gender	/m/05zppz
/m/06pj8	/film/director/film	/m/0hx4y
/m/01hww_	/music/performance_role/track_performances./music/track_contribution/role	/m/0jtg0
/m/017z88	/education/educational_institution/students_graduates./education/education/major_field_of_study	/m/01xqw
/m/09blyk	/media_common/netflix_genre/titles	/m/04sh80
/m/017y6l	/education/university/domestic_tuition./measurement_unit/dated_money_value/currency	/m/09nqf
/m/02h1rt	/award/award_nominee/award_nominations./award/award_nomination/award	/m/0gs96
/m/014v6f	/film/actor/film./film/performance/film	/m/064ndc
/m/06q8qh	/film/film/other_crew./film/film_crew_gig/film_crew_role	/m/0dxtw
/m/01b7h8	/tv/tv_program/languages	/m/02h40lc
/m/07m69t	/sports/pro_athlete/teams./sports/sports_team_roster/team	/m/01cwm1
/m/025b5y	/people/person/places_lived./people/place_lived/location	/m/02cl1
/m/06msq2	/award/award_winner/awards_won./award/award_honor/award_winner	/m/01j7rd
/m/05fnl9	/award/award_winner/awards_won./award/award_honor/award_winner	/m/01y665
/m/071pf2	/sports/pro_athlete/teams./sports/sports_team_roster/team	/m/01j95f
/m/01wmxfs	/people/person/profession	/m/08z956
/m/02x02kb	/people/person/place_of_birth	/m/0hj6h
/m/014mlp	/education/educational_degree/people_with_this_degree./education/education/major_field_of_study	/m/088tb
/m/03bx2lk	/film/film/release_date_s./film/film_regional_release_date/film_release_region	/m/05b4w
/m/0gv40	/people/person/gender	/m/05zppz
/m/03j0ss	/sports/sports_team/colors	/m/019sc
/m/06thjt	/education/educational_institution/colors	/m/088fh
/m/03y_46	/film/actor/film./film/performance/film	/m/0m313
/m/08_vwq	/award/award_category/winners./award/award_honor/award_winner	/m/039xcr
/m/01vvb4m	/film/actor/film./film/performance/film	/m/084qpk
/m/02_xgp2	/education/educational_degree/people_with_this_degree./education/education/institution	/m/014d4v
/m/01l1hr	/people/person/place_of_birth	/m/030qb3t
/m/071pf2	/people/person/gender	/m/05zppz
/m/039bpc	/base/schemastaging/person_extra/net_worth./measurement_unit/dated_money_value/currency	/m/09nqf
/m/06zdt7	/soccer/football_team/current_roster./sports/sports_team_roster/position	/m/0dgrmp
/m/06qd3	/olympics/olympic_participating_country/medals_won./olympics/olympic_medal_honor/olympics	/m/0jhn7
/m/0f8l9c	/olympics/olympic_participating_country/athletes./olympics/olympic_athlete_affiliation/olympics	/m/0jhn7
/m/013zdg	/education/educational_degree/people_with_this_degree./education/education/institution	/m/014zws
/m/047dpm0	/sports/sports_league_draft/picks./sports/sports_league_draft_pick/school	/m/01lnyf
/m/07brj	/music/performance_role/track_performances./music/track_contribution/role	/m/02k84w
/m/039yzf	/award/award_category/winners./award/award_honor/award_winner	/m/01dzz7
/m/02p86pb	/film/film/genre	/m/03bxz7
/m/012bk	/people/person/gender	/m/05zppz
/m/0cj2nl	/award/award_winner/awards_won./award/award_honor/award_winner	/m/08hsww
/m/0ccd3x	/film/film/produced_by	/m/0hsmh
/m/0bynt	/olympics/olympic_sport/athletes./olympics/olympic_athlete_affiliation/country	/m/0h7x
/m/06thjt	/business/business_operation/operating_income./measurement_unit/dated_money_value/currency	/m/09nqf
/m/03wy70	/film/actor/film./film/performance/film	/m/07jnt
/m/01pcdn	/award/award_nominee/award_nominations./award/award_nomination/award_nominee	/m/0m66w
/m/06101p	/people/person/gender	/m/05zppz
/m/057pq5	/soccer/football_team/current_roster./sports/sports_team_roster/position	/m/0dgrmp
/m/04tng0	/award/award_nominated_work/award_nominations./award/award_nomination/nominated_for	/m/0p9tm
/m/05bnq3j	/award/award_nominee/award_nominations./award/award_nomination/award_nominee	/m/06msq2
/m/015pvh	/award/award_nominee/award_nominations./award/award_nomination/award_nominee	/m/06bzwt
/m/047xyn	/award/award_category/winners./award/award_honor/award_winner	/m/04x56
/m/04cw0j	/award/award_nominee/award_nominations./award/award_nomination/award_nominee	/m/0l6qt
/m/03gh4	/base/popstra/location/vacationers./base/popstra/vacation_choice/vacationer	/m/0147dk
/m/0713r	/sports/sports_team/roster./baseball/baseball_roster_position/position	/m/028c_8
/m/01rwcgb	/people/person/profession	/m/028kk_
/m/01hnb	/organization/organization/headquarters./location/mailing_address/state_province_region	/m/06yxd
/m/01crd5	/location/statistical_region/gdp_nominal_per_capita./measurement_unit/dated_money_value/currency	/m/09nqf
/m/0l6qt	/award/award_nominee/award_nominations./award/award_nomination/award	/m/0gr4k
/m/0f8l9c	/location/location/time_zones	/m/02llzg
/m/01pgp6	/film/film/language	/m/02h40lc
/m/059x66	/time/event/instance_of_recurring_event	/m/0g_w
/m/02__x	/sports/professional_sports_team/draft_picks./sports/sports_league_draft_pick/school	/m/02rv1w
/m/012vct	/people/person/profession	/m/0dxtg
/m/049xgc	/film/film/other_crew./film/film_crew_gig/film_crew_role	/m/04pyp5
/m/03nsm5x	/film/film/genre	/m/02l7c8
/m/03gvt	/music/performance_role/track_performances./music/track_contribution/role	/m/0l14md
/m/0879bpq	/film/film/release_date_s./film/film_regional_release_date/film_release_region	/m/04gzd
/m/0mymy	/location/statistical_region/rent50_2./measurement_unit/dated_money_value/currency	/m/09nqf
/m/02qgqt	/film/actor/film./film/performance/film	/m/033qdy
/m/017z88	/education/educational_institution/students_graduates./education/education/student	/m/048lv
/m/02hn5v	/award/award_ceremony/awards_presented./award/award_honor/honored_for	/m/06823p
/m/076lxv	/film/film_set_designer/film_sets_designed	/m/05dmmc
/m/02mx98	/music/artist/track_contributions./music/track_contribution/role	/m/05842k
/m/05qbckf	/film/film/estimated_budget./measurement_unit/dated_money_value/currency	/m/09nqf
/m/05z55	/food/food/nutrients./food/nutrition_fact/nutrient	/m/09pbb
/m/0184jc	/people/person/places_lived./people/place_lived/location	/m/0chgzm
/m/0136g9	/award/award_nominee/award_nominations./award/award_nomination/award_nominee	/m/01pfkw
/m/0frq6	/food/food/nutrients./food/nutrition_fact/nutrient	/m/02kcv4x
/m/01xqw	/music/performance_role/regular_performances./music/group_membership/role	/m/0myk8
/m/027kmrb	/award/award_nominee/award_nominations./award/award_nomination/award_nominee	/m/0147dk
/m/03gvt	/music/performance_role/regular_performances./music/group_membership/role	/m/0gkd1
/m/02h3tp	/people/person/religion	/m/0c8wxp
/m/0gz6b6g	/film/film/genre	/m/07s9rl0
/m/02f716	/award/award_category/winners./award/award_honor/award_winner	/m/01vs_v8
/m/053y0s	/music/artist/contribution./music/recording_contribution/performance_role	/m/0l14qv
/m/0320jz	/base/popstra/celebrity/canoodled./base/popstra/canoodled/participant	/m/01pw2f1
/m/0f0kz	/award/award_nominee/award_nominations./award/award_nomination/award_nominee	/m/02ck7w
/m/05pdh86	/film/film/release_date_s./film/film_regional_release_date/film_release_region	/m/06qd3
/m/05b7q	/military/military_combatant/military_conflicts./military/military_combatant_group/combatants	/m/0g970
/m/0fxmbn	/film/film/estimated_budget./measurement_unit/dated_money_value/currency	/m/09nqf
/m/0ff3y	/influence/influence_node/influenced_by	/m/07dnx
/m/03cw411	/award/award_winning_work/awards_won./award/award_honor/award	/m/05zvq6g
/m/0mdqp	/film/actor/film./film/performance/film	/m/05c26ss
/m/026m0	/people/person/gender	/m/05zppz
/m/01nn3m	/music/artist/track_contributions./music/track_contribution/role	/m/0l14md
/m/03d2k	/award/award_nominee/award_nominations./award/award_nomination/award	/m/01bgqh
/m/0jz71	/film/film/genre	/m/02l7c8
/m/05lb87	/people/person/spouse_s./people/marriage/type_of_union	/m/04ztj
/m/01ffx4	/film/film/release_date_s./film/film_regional_release_date/film_release_region	/m/05qhw
/m/043t8t	/film/film/other_crew./film/film_crew_gig/film_crew_role	/m/09vw2b7
/m/02vtnf	/award/award_nominee/award_nominations./award/award_nomination/nominated_for	/m/0gcrg
/m/0l14j_	/music/performance_role/regular_performances./music/group_membership/role	/m/0319l
/m/0136g9	/people/person/profession	/m/01c72t
/m/01jft4	/film/film/language	/m/02h40lc
/m/036hf4	/award/award_nominee/award_nominations./award/award_nomination/award_nominee	/m/07swvb
/m/05mt_q	/award/award_nominee/award_nominations./award/award_nomination/award_nominee	/m/047sxrj
/m/0btbyn	/film/film/other_crew./film/film_crew_gig/film_crew_role	/m/09vw2b7
/m/01_vfy	/people/person/spouse_s./people/marriage/type_of_union	/m/04ztj
/m/01rzqj	/award/award_winner/awards_won./award/award_honor/award_winner	/m/04wvhz
/m/040njc	/award/award_category/nominees./award/award_nomination/nominated_for	/m/011yhm
/m/0579tg2	/award/award_nominee/award_nominations./award/award_nomination/award_nominee	/m/076psv
/m/04bdxl	/people/person/spouse_s./people/marriage/type_of_union	/m/04ztj
/m/05y7hc	/people/person/profession	/m/01c72t
/m/027n4zv	/award/award_winner/awards_won./award/award_honor/award_winner	/m/048q6x
/m/026yqrr	/award/award_nominee/award_nominations./award/award_nomination/award_nominee	/m/05vzw3
/m/02vkzcx	/education/university/international_tuition./measurement_unit/dated_money_value/currency	/m/09nqf
/m/0f4_l	/award/award_winning_work/awards_won./award/award_honor/award	/m/02w_6xj
/m/0408np	/people/person/profession	/m/0dxtg
/m/0fd_1	/people/person/spouse_s./people/marriage/type_of_union	/m/04ztj
/m/01qbg5	/film/film/language	/m/02h40lc
/m/01rzqj	/award/award_nominee/award_nominations./award/award_nomination/award_nominee	/m/059j4x
/m/09n4nb	/award/award_ceremony/awards_presented./award/award_honor/award_winner	/m/05y7hc
/m/03_6y	/base/popstra/celebrity/canoodled./base/popstra/canoodled/participant	/m/0336mc
/m/02rdxsh	/award/award_category/nominees./award/award_nomination/nominated_for	/m/0sxmx
/m/01nyl	/location/statistical_region/gni_per_capita_in_ppp_dollars./measurement_unit/dated_money_value/currency	/m/09nqf
/m/040v3t	/award/award_category/disciplines_or_subjects	/m/0707q
/m/02t_h3	/film/film/language	/m/02h40lc
/m/015nhn	/award/award_winner/awards_won./award/award_honor/award_winner	/m/0h32q
/m/012v9y	/people/deceased_person/place_of_death	/m/06_kh
/m/01963w	/award/award_nominee/award_nominations./award/award_nomination/award	/m/040vk98
/m/03rhqg	/music/record_label/artist	/m/01vs_v8
/m/02h4rq6	/education/educational_degree/people_with_this_degree./education/education/institution	/m/027xx3
/m/01xdf5	/influence/influence_node/influenced_by	/m/013qvn
/m/031k24	/award/award_nominee/award_nominations./award/award_nomination/award_nominee	/m/01jw4r
/m/02h7qr	/education/university/domestic_tuition./measurement_unit/dated_money_value/currency	/m/09nqf
/m/0gkd1	/music/performance_role/regular_performances./music/group_membership/role	/m/02sgy
/m/0gr4k	/award/award_category/winners./award/award_honor/award_winner	/m/07s93v
/m/06d6y	/award/award_nominee/award_nominations./award/award_nomination/nominated_for	/m/04ddm4
/m/0319l	/music/performance_role/regular_performances./music/group_membership/group	/m/02vgh
/m/010xjr	/people/person/spouse_s./people/marriage/type_of_union	/m/04ztj
/m/0l14qv	/music/performance_role/track_performances./music/track_contribution/role	/m/023r2x
/m/0j3v	/people/person/places_lived./people/place_lived/location	/m/02z0j
/m/05c26ss	/film/film/language	/m/02h40lc
/m/05z_kps	/film/film/production_companies	/m/0283xx2
/m/04sh80	/film/film/genre	/m/0c3351
/m/015pnb	/tv/tv_program/genre	/m/05p553
/m/03pmfw	/organization/organization/place_founded	/m/07dfk
/m/0824r	/location/statistical_region/gdp_nominal./measurement_unit/dated_money_value/currency	/m/09nqf
/m/02825nf	/film/film/release_date_s./film/film_regional_release_date/film_release_region	/m/015fr
/m/02bh8z	/business/business_operation/operating_income./measurement_unit/dated_money_value/currency	/m/09nqf
/m/05k7sb	/location/location/contains	/m/0tzls
/m/01rthc	/music/genre/artists	/m/07n3s
/m/08sfxj	/award/award_winning_work/awards_won./award/award_honor/award_winner	/m/04w1j9
/m/04g5k	/organization/organization_member/member_of./organization/organization_membership/organization	/m/01rz1
/m/0dgrmp	/sports/sports_position/players./sports/sports_team_roster/team	/m/05z01
/m/0blbxk	/award/award_nominee/award_nominations./award/award_nomination/nominated_for	/m/026p4q7
/m/01ztgm	/base/popstra/celebrity/dated./base/popstra/dated/participant	/m/02ts3h
/m/0c38gj	/film/film/estimated_budget./measurement_unit/dated_money_value/currency	/m/09nqf
/m/09sdmz	/award/award_category/nominees./award/award_nomination/nominated_for	/m/0194zl
/m/02x6dqb	/film/film/release_date_s./film/film_regional_release_date/film_release_region	/m/015fr
/m/015vq_	/award/award_nominee/award_nominations./award/award_nomination/award_nominee	/m/02ch1w
/m/04sry	/people/person/gender	/m/05zppz
/m/05_5_22	/film/film/prequel	/m/02825kb
/m/08y2fn	/film/film/genre	/m/04xvh5
/m/0gv40	/award/award_nominee/award_nominations./award/award_nomination/nominated_for	/m/0k419
/m/05c4fys	/soccer/football_player/current_team./sports/sports_team_roster/team	/m/02b1mc
/m/03yrkt	/film/actor/dubbing_performances./film/dubbing_performance/language	/m/02h40lc
/m/03hrz	/travel/travel_destination/climate./travel/travel_destination_monthly_climate/month	/m/028kb
/m/020_4z	/people/person/languages	/m/02h40lc
/m/01cszh	/music/record_label/artist	/m/0k1bs
/m/04rrx	/location/location/contains	/m/0wh3
/m/04f7c55	/film/actor/film./film/performance/film	/m/04gv3db
/m/0d3qd0	/people/person/spouse_s./people/marriage/type_of_union	/m/04ztj
/m/03ff65	/soccer/football_team/current_roster./soccer/football_roster_position/position	/m/0dgrmp
/m/012mzw	/business/business_operation/assets./measurement_unit/dated_money_value/currency	/m/09nqf
/m/0lp_cd3	/award/award_ceremony/awards_presented./award/award_honor/honored_for	/m/05zr0xl
/m/01b65l	/tv/tv_program/languages	/m/02h40lc
/m/03yvf2	/film/film/production_companies	/m/016tt2
/m/0275n3y	/award/award_ceremony/awards_presented./award/award_honor/award_winner	/m/0gy6z9
/m/098sx	/people/person/spouse_s./people/marriage/type_of_union	/m/04ztj
/m/03ynwqj	/film/film/language	/m/02h40lc
/m/01z27	/olympics/olympic_sport/athletes./olympics/olympic_athlete_affiliation/country	/m/05qhw
/m/01sby_	/film/film/release_date_s./film/film_regional_release_date/film_release_region	/m/0jgd
/m/014zws	/education/university/domestic_tuition./measurement_unit/dated_money_value/currency	/m/09nqf
/m/0nk72	/people/person/place_of_birth	/m/03pbf
/m/083qy7	/sports/pro_athlete/teams./sports/sports_team_roster/team	/m/0hvjr
/m/0fc_9	/location/statistical_region/rent50_2./measurement_unit/dated_money_value/currency	/m/09nqf
/m/0738b8	/people/person/places_lived./people/place_lived/location	/m/013yq
/m/0j5b8	/people/person/spouse_s./people/marriage/type_of_union	/m/04ztj
/m/01dw_f	/people/person/place_of_birth	/m/0f2v0
/m/02bv9	/language/human_language/countries_spoken_in	/m/0154j
/m/0bykpk	/film/film/music	/m/02sj1x
/m/0nk72	/people/person/places_lived./people/place_lived/location	/m/03pbf
/m/0fthdk	/award/award_nominee/award_nominations./award/award_nomination/award_nominee	/m/07swvb
/m/01wrcxr	/film/actor/film./film/performance/film	/m/01gvpz
/m/047d21r	/film/film/produced_by	/m/0gy6z9
/m/03__77	/soccer/football_team/current_roster./soccer/football_roster_position/position	/m/0dgrmp
/m/0gd92	/film/film/genre	/m/07s9rl0
/m/05qhw	/military/military_combatant/military_conflicts./military/military_combatant_group/combatants	/m/03bxbql
/m/011yxg	/award/award_winning_work/awards_won./award/award_honor/honored_for	/m/0194zl
/m/04mx7s	/music/group_member/membership./music/group_membership/group	/m/01fchy
/m/03xp8d5	/award/award_nominee/award_nominations./award/award_nomination/nominated_for	/m/07c72
/m/03nnm4t	/time/event/instance_of_recurring_event	/m/0gcf2r
/m/0gx1673	/award/award_ceremony/awards_presented./award/award_honor/award_winner	/m/01_x6d
/m/01y9r2	/award/award_winning_work/awards_won./award/award_honor/award	/m/02x258x
/m/0154qm	/award/award_nominee/award_nominations./award/award_nomination/nominated_for	/m/017gl1
/m/02qyntr	/award/award_category/nominees./award/award_nomination/nominated_for	/m/0sxns
/m/0168t	/location/location/time_zones	/m/042g7t
/m/09wj5	/award/award_winner/awards_won./award/award_honor/award_winner	/m/015t56
/m/02bfmn	/award/award_nominee/award_nominations./award/award_nomination/award_nominee	/m/0f0kz
/m/0gl02yg	/film/film/release_date_s./film/film_regional_release_date/film_release_region	/m/0d0vqn
/m/08lpkq	/people/person/gender	/m/05zppz
/m/04nlb94	/film/film/other_crew./film/film_crew_gig/film_crew_role	/m/0dxtw
/m/0bynt	/olympics/olympic_sport/athletes./olympics/olympic_athlete_affiliation/olympics	/m/0lbd9
/m/03jg5t	/people/person/gender	/m/05zppz
/m/01v1d8	/music/instrument/instrumentalists	/m/01w9k25
/m/030155	/award/award_nominee/award_nominations./award/award_nomination/award	/m/01bgqh
/m/0713r	/sports/professional_sports_team/draft_picks./sports/sports_league_draft_pick/school	/m/01dzg0
/m/048q6x	/award/award_nominee/award_nominations./award/award_nomination/award	/m/0bdwqv
/m/01r93l	/film/actor/film./film/performance/film	/m/049xgc
/m/019pm_	/film/actor/film./film/performance/film	/m/0241y7
/m/02qgyv	/award/award_nominee/award_nominations./award/award_nomination/award	/m/054ks3
/m/042l8n	/soccer/football_team/current_roster./soccer/football_roster_position/position	/m/0dgrmp
/m/08fn5b	/film/film/other_crew./film/film_crew_gig/film_crew_role	/m/0dxtw
/m/0g2lq	/base/schemastaging/person_extra/net_worth./measurement_unit/dated_money_value/currency	/m/09nqf
/m/02kxbwx	/film/director/film	/m/02704ff
/m/0dzt9	/location/statistical_region/rent50_2./measurement_unit/dated_money_value/currency	/m/09nqf
/m/04mp8x	/soccer/football_team/current_roster./soccer/football_roster_position/position	/m/0dgrmp
/m/03nsm5x	/film/film/other_crew./film/film_crew_gig/film_crew_role	/m/0ch6mp2
/m/06m6z6	/award/award_nominee/award_nominations./award/award_nomination/award	/m/04dn09n
/m/02y21l	/music/record_label/artist	/m/01dw_f
/m/0lbbj	/olympics/olympic_games/sports	/m/06z6r
/m/03tdlh	/film/actor/film./film/performance/film	/m/0b4lkx
/m/07h07	/award/award_nominee/award_nominations./award/award_nomination/award	/m/04dn09n
/m/04cl1	/people/person/languages	/m/02h40lc
/m/0fxz4	/location/statistical_region/rent50_2./measurement_unit/dated_money_value/currency	/m/09nqf
/m/04j13sx	/film/film/language	/m/02h40lc
/m/01gxqf	/soccer/football_team/current_roster./soccer/football_roster_position/position	/m/0dgrmp
/m/09sb52	/award/award_category/winners./award/award_honor/award_winner	/m/01v9l67
/m/018yv3	/music/genre/artists	/m/06rgq
/m/01rc4p	/people/person/employment_history./business/employment_tenure/company	/m/09kvv
/m/0jyx6	/film/film/other_crew./film/film_crew_gig/film_crew_role	/m/01pvkk
/m/0dfw0	/film/film/genre	/m/02l7c8
/m/0175yg	/music/genre/artists	/m/01tw31
/m/01rwcgb	/people/person/nationality	/m/03rk0
/m/0hmr4	/film/film/genre	/m/05p553
/m/06szd3	/award/award_category/winners./award/award_honor/award_winner	/m/02dh86
/m/04fhxp	/people/person/profession	/m/0np9r
/m/06c1y	/location/statistical_region/gdp_nominal./measurement_unit/dated_money_value/currency	/m/09nqf
/m/01hcj2	/base/popstra/celebrity/friendship./base/popstra/friendship/participant	/m/0bqs56
/m/0kv238	/film/film/release_date_s./film/film_regional_release_date/film_release_region	/m/0b90_r
/m/01w4c9	/music/performance_role/track_performances./music/track_contribution/role	/m/01qbl
/m/05zr0xl	/award/award_winning_work/awards_won./award/award_honor/award	/m/0cqhk0
/m/02ppg1r	/film/film/genre	/m/02l7c8
/m/031zkw	/award/award_nominee/award_nominations./award/award_nomination/award	/m/02x8n1n
/m/01gkgk	/government/government_office_category/officeholders./government/government_position_held/jurisdiction_of_office	/m/0f8l9c
/m/0p17j	/people/person/spouse_s./people/marriage/type_of_union	/m/04ztj
/m/013fn	/tv/tv_network/programs./tv/tv_network_duration/program	/m/01hn_t
/m/0jhn7	/user/jg/default_domain/olympic_games/sports	/m/06z6r
/m/03gn1x	/education/university/domestic_tuition./measurement_unit/dated_money_value/currency	/m/09nqf
/m/0cq7tx	/film/film/genre	/m/07s9rl0
/m/028qdb	/award/award_nominee/award_nominations./award/award_nomination/award_nominee	/m/02qlg7s
/m/013b2h	/award/award_ceremony/awards_presented./award/award_honor/award_winner	/m/01wg6y
/m/07tds	/education/educational_institution/students_graduates./education/education/student	/m/0641g8
/m/01718w	/film/film/other_crew./film/film_crew_gig/film_crew_role	/m/04pyp5
/m/01jpmpv	/people/person/gender	/m/05zppz
/m/01nfys	/film/actor/film./film/performance/film	/m/0bmssv
/m/01ngn3	/location/location/adjoin_s./location/adjoining_relationship/adjoins	/m/015m08
/m/032d52	/business/business_operation/revenue./measurement_unit/dated_money_value/currency	/m/09nqf
/m/0l786	/base/popstra/celebrity/breakup./base/popstra/breakup/participant	/m/031sg0
/m/03jht	/influence/influence_node/influenced_by	/m/0j3v
/m/05mt6w	/award/award_nominee/award_nominations./award/award_nomination/award	/m/054krc
/m/037hgm	/award/award_nominee/award_nominations./award/award_nomination/nominated_for	/m/0q9b0
/m/03yrkt	/award/award_nominee/award_nominations./award/award_nomination/award_nominee	/m/0gx_p
/m/07s9rl0	/media_common/netflix_genre/titles	/m/01qbg5
/m/0c40vxk	/film/film/release_date_s./film/film_regional_release_date/film_release_region	/m/03gj2
/m/04q7r	/music/performance_role/regular_performances./music/group_membership/role	/m/0l14j_
/m/025ts_z	/film/film/release_date_s./film/film_regional_release_date/film_release_region	/m/0jgd
/m/0nr_q	/location/location/adjoin_s./location/adjoining_relationship/adjoins	/m/0nryt
/m/072bb1	/base/popstra/celebrity/dated./base/popstra/dated/participant	/m/060j8b
/m/034q3l	/film/actor/film./film/performance/film	/m/0b4lkx
/m/02k_kn	/music/genre/artists	/m/095x_
/m/03clwtw	/film/film/estimated_budget./measurement_unit/dated_money_value/currency	/m/09nqf
/m/02q0v8n	/film/film/other_crew./film/film_crew_gig/film_crew_role	/m/0ch6mp2
/m/0b6l1st	/film/film/language	/m/02h40lc
/m/0q9b0	/film/film/other_crew./film/film_crew_gig/film_crew_role	/m/09vw2b7
/m/023kzp	/award/award_nominee/award_nominations./award/award_nomination/award_nominee	/m/03_6y
/m/0gr4k	/award/award_category/winners./award/award_honor/award_winner	/m/085pr
/m/0bby9p5	/film/film/estimated_budget./measurement_unit/dated_money_value/currency	/m/09nqf
/m/072hx4	/film/film/release_date_s./film/film_regional_release_date/film_release_region	/m/0f8l9c
/m/03clwtw	/film/film/film_format	/m/07fb8_
/m/07f0tw	/people/person/religion	/m/0flw86
/m/05dmmc	/film/film/featured_film_locations	/m/05qtj
/m/01h910	/award/award_nominee/award_nominations./award/award_nomination/award	/m/0cqhk0
/m/03bzyn4	/film/film/other_crew./film/film_crew_gig/film_crew_role	/m/0dxtw
/m/02ywhz	/award/award_ceremony/awards_presented./award/award_honor/honored_for	/m/0170xl
/m/014mlp	/education/educational_degree/people_with_this_degree./education/education/student	/m/01t6b4
/m/01p970	/music/performance_role/track_performances./music/track_contribution/role	/m/0l14qv
/m/03k7bd	/people/person/gender	/m/05zppz
/m/0m9v7	/people/person/profession	/m/0dxtg
/m/0bynt	/olympics/olympic_sport/athletes./olympics/olympic_athlete_affiliation/country	/m/07ylj
/m/0myk8	/music/performance_role/track_performances./music/track_contribution/role	/m/0l15bq
/m/0h3tv	/sports/sports_team_location/teams	/m/080_y
/m/02qgyv	/award/award_nominee/award_nominations./award/award_nomination/award_nominee	/m/01tcf7
/m/03wj4r8	/film/film/production_companies	/m/030_1m
/m/0nf3h	/location/location/time_zones	/m/02fqwt
/m/0jt90f5	/people/person/spouse_s./people/marriage/type_of_union	/m/04ztj
/m/0bnzd	/award/award_winning_work/awards_won./award/award_honor/award_winner	/m/0h1nt
/m/054krc	/award/award_category/nominees./award/award_nomination/nominated_for	/m/0cf08
/m/01hvv0	/tv/tv_program/genre	/m/025s89p
/m/04kxsb	/award/award_category/nominees./award/award_nomination/nominated_for	/m/016ks5
/m/0hx4y	/film/film/produced_by	/m/06pj8
/m/012wyq	/location/location/contains	/m/02b7nz
/m/01k_n63	/people/person/spouse_s./people/marriage/type_of_union	/m/04ztj
/m/029q_y	/base/popstra/celebrity/friendship./base/popstra/friendship/participant	/m/01jb26
/m/04bdxl	/people/person/religion	/m/0c8wxp
/m/05t0zfv	/film/film/genre	/m/0jxy
/m/05xd8x	/award/award_nominee/award_nominations./award/award_nomination/award	/m/0b6k___
/m/02qgqt	/award/award_nominee/award_nominations./award/award_nomination/award_nominee	/m/03zg2x
/m/0bxs_d	/award/award_ceremony/awards_presented./award/award_honor/award_winner	/m/03c6vl
/m/02lyr4	/sports/sports_position/players./sports/sports_team_roster/team	/m/02d02
/m/03xx9l	/people/person/profession	/m/0dxtg
/m/07l8x	/baseball/baseball_team/team_stats./baseball/baseball_team_stats/season	/m/0285r5d
/m/0319l	/music/performance_role/track_performances./music/track_contribution/role	/m/085jw
/m/04bgy	/people/person/spouse_s./people/marriage/type_of_union	/m/04ztj
/m/015g_7	/people/person/gender	/m/05zppz
/m/0431v3	/award/award_winning_work/awards_won./award/award_honor/award_winner	/m/030hbp
/m/0382m4	/tv/tv_producer/programs_produced./tv/tv_producer_term/program	/m/0fhzwl
/m/014knw	/film/film/release_date_s./film/film_regional_release_date/film_release_region	/m/0d0vqn
/m/0pnf3	/award/award_nominee/award_nominations./award/award_nomination/award_nominee	/m/0169dl
/m/02l6dy	/award/award_winner/awards_won./award/award_honor/award_winner	/m/0dyztm
/m/03s9b	/award/award_nominee/award_nominations./award/award_nomination/award	/m/040njc
/m/08l0x2	/tv/tv_program/regular_cast./tv/regular_tv_appearance/actor	/m/01gvr1
/m/027pfg	/film/film/release_date_s./film/film_regional_release_date/film_release_region	/m/0d0vqn
/m/019w9j	/olympics/olympic_sport/athletes./olympics/olympic_athlete_affiliation/country	/m/06c1y
/m/048lv	/award/award_nominee/award_nominations./award/award_nomination/award_nominee	/m/019pm_
/m/0h95b81	/tv/tv_program/languages	/m/02h40lc
/m/01679d	/music/performance_role/regular_performances./music/group_membership/role	/m/0l15bq
/m/04smkr	/award/award_nominee/award_nominations./award/award_nomination/award_nominee	/m/0b_dy
/m/01jpmpv	/award/award_nominee/award_nominations./award/award_nomination/award	/m/054krc
/m/06mfvc	/award/award_nominee/award_nominations./award/award_nomination/award_nominee	/m/083chw
/m/02nx2k	/film/film/genre	/m/02n4kr
/m/05hmp6	/award/award_ceremony/awards_presented./award/award_honor/award_winner	/m/02sj1x
/m/0jgd	/location/location/adjoin_s./location/adjoining_relationship/adjoins	/m/015fr
/m/08_vwq	/award/award_category/winners./award/award_honor/award_winner	/m/0p9qb
/m/08052t3	/film/film/film_format	/m/0cj16
/m/02q6gfp	/film/film/country	/m/0f8l9c
/m/02z3zp	/influence/influence_node/influenced_by	/m/0ph2w
/m/04yywz	/award/award_nominee/award_nominations./award/award_nomination/nominated_for	/m/0140g4
/m/013rds	/people/person/profession	/m/016z4k
/m/02h4rq6	/education/educational_degree/people_with_this_degree./education/education/major_field_of_study	/m/064_8sq
/m/02l6dy	/people/person/places_lived./people/place_lived/location	/m/030qb3t
/m/02_xgp2	/education/educational_degree/people_with_this_degree./education/education/institution	/m/01lhdt
/m/0fhp9	/location/location/adjoin_s./location/adjoining_relationship/adjoins	/m/0133h8
/m/03772	/people/person/profession	/m/0dxtg
/m/06kx2	/base/biblioness/bibs_location/state	/m/059_c
/m/03kxdw	/people/person/spouse_s./people/marriage/type_of_union	/m/04ztj
/m/0gr4k	/award/award_category/nominees./award/award_nomination/nominated_for	/m/07jnt
/m/05kh_	/people/person/profession	/m/0dxtg
/m/012rrr	/location/administrative_division/country	/m/0h7x
/m/0x67	/people/ethnicity/people	/m/011vx3
/m/086xm	/education/university/domestic_tuition./measurement_unit/dated_money_value/currency	/m/09nqf
/m/05p09dd	/film/film/release_date_s./film/film_regional_release_date/film_release_region	/m/05b4w
/m/0126rp	/influence/influence_node/influenced_by	/m/01wp_jm
/m/01_lh1	/business/business_operation/revenue./measurement_unit/dated_money_value/currency	/m/09nqf
/m/01f7gh	/film/film/other_crew./film/film_crew_gig/film_crew_role	/m/0ch6mp2
/m/02ktt7	/business/business_operation/assets./measurement_unit/dated_money_value/currency	/m/09nqf
/m/06hhrs	/award/award_nominee/award_nominations./award/award_nomination/award	/m/0cqhk0
/m/05g3b	/sports/sports_team/roster./american_football/football_historical_roster_position/position_s	/m/0bgv4g
/m/0mgkg	/business/business_operation/revenue./measurement_unit/dated_money_value/currency	/m/09nqf
/m/060__7	/film/film/genre	/m/02l7c8
/m/0h14ln	/film/film/other_crew./film/film_crew_gig/film_crew_role	/m/0ch6mp2
/m/04chyn	/organization/organization/headquarters./location/mailing_address/citytown	/m/09b8m
/m/06cp5	/music/genre/artists	/m/01vw26l
/m/01qh7	/location/statistical_region/rent50_2./measurement_unit/dated_money_value/currency	/m/09nqf
/m/02ck7w	/people/person/nationality	/m/0chghy
/m/015t56	/award/award_nominee/award_nominations./award/award_nomination/award_nominee	/m/0154qm
/m/07jwr	/people/cause_of_death/people	/m/0bwx3
/m/05hc96	/sports/sports_team/colors	/m/019sc
/m/0jqj5	/film/film/language	/m/02h40lc
/m/0gr4k	/award/award_category/nominees./award/award_nomination/nominated_for	/m/02r858_
/m/0gbwp	/people/person/profession	/m/0n1h
/m/03_wj_	/base/popstra/celebrity/friendship./base/popstra/friendship/participant	/m/044mjy
/m/07s9rl0	/media_common/netflix_genre/titles	/m/0fpkhkz
/m/0151xv	/film/actor/film./film/performance/film	/m/0m9p3
/m/0289q	/sports/sports_team/roster./american_football/football_historical_roster_position/position_s	/m/05zm34
/m/031786	/film/film/estimated_budget./measurement_unit/dated_money_value/currency	/m/09nqf
/m/0l14j_	/music/performance_role/track_performances./music/track_contribution/role	/m/0l15bq
/m/02ylg6	/film/film/language	/m/02h40lc
/m/02gkzs	/government/legislative_session/members./government/government_position_held/district_represented	/m/03gh4
/m/04cw0j	/award/award_nominee/award_nominations./award/award_nomination/award_nominee	/m/07h07
/m/040njc	/award/award_category/nominees./award/award_nomination/nominated_for	/m/0ccd3x
/m/0544vh	/soccer/football_team/current_roster./sports/sports_team_roster/position	/m/0dgrmp
/m/02l6dy	/award/award_nominee/award_nominations./award/award_nomination/award_nominee	/m/0dyztm
/m/06pj8	/film/actor/film./film/performance/film	/m/013q07
/m/03t97y	/film/film/other_crew./film/film_crew_gig/film_crew_role	/m/01pvkk
/m/0q74c	/location/location/time_zones	/m/02fqwt
/m/03nnm4t	/award/award_ceremony/awards_presented./award/award_honor/award_winner	/m/01t6b4
/m/040rjq	/award/award_nominee/award_nominations./award/award_nomination/award	/m/01l78d
/m/0l15bq	/music/performance_role/track_performances./music/track_contribution/role	/m/0xzly
/m/014mlp	/education/educational_degree/people_with_this_degree./education/education/student	/m/02hsgn
/m/01zlwg6	/location/hud_county_place/county	/m/0kvt9
/m/0bdjd	/film/film/release_date_s./film/film_regional_release_date/film_release_region	/m/06npd
/m/03gj2	/olympics/olympic_participating_country/medals_won./olympics/olympic_medal_honor/olympics	/m/06sks6
/m/0177gl	/soccer/football_team/current_roster./sports/sports_team_roster/position	/m/0dgrmp
/m/04mp75	/soccer/football_team/current_roster./sports/sports_team_roster/position	/m/0dgrmp
/m/02kxbwx	/award/award_nominee/award_nominations./award/award_nomination/nominated_for	/m/011yhm
/m/0b7l4x	/film/film/other_crew./film/film_crew_gig/film_crew_role	/m/089g0h
/m/07z542	/award/award_winner/awards_won./award/award_honor/award_winner	/m/03xgm3
/m/01n8_g	/people/person/place_of_birth	/m/0cvw9
/m/0202p_	/film/actor/film./film/performance/film	/m/04tng0
/m/0nh0f	/location/statistical_region/rent50_2./measurement_unit/dated_money_value/currency	/m/09nqf
/m/01qbl	/music/instrument/family	/m/0l14md
/m/015wfg	/award/award_nominee/award_nominations./award/award_nomination/nominated_for	/m/0pd64
/m/070j61	/award/award_winner/awards_won./award/award_honor/award_winner	/m/046b0s
/m/0633p0	/film/actor/film./film/performance/film	/m/04j14qc
/m/01_x6v	/award/award_nominee/award_nominations./award/award_nomination/award	/m/0cjcbg
/m/0cqhk0	/award/award_category/winners./award/award_honor/award_winner	/m/015c2f
/m/04ztj	/people/marriage_union_type/unions_of_this_type./people/marriage/location_of_ceremony	/m/0160w
/m/0277j40	/film/film/estimated_budget./measurement_unit/dated_money_value/currency	/m/09nqf
/m/0ply0	/travel/travel_destination/climate./travel/travel_destination_monthly_climate/month	/m/02xx5
/m/05qbckf	/film/film/executive_produced_by	/m/079vf
/m/06npd	/military/military_combatant/military_conflicts./military/military_combatant_group/combatants	/m/02psqkz
/m/071t0	/olympics/olympic_sport/athletes./olympics/olympic_athlete_affiliation/country	/m/06c1y
/m/02l9wl	/education/educational_institution/students_graduates./education/education/student	/m/05l0j5
/m/0hfml	/people/person/gender	/m/05zppz
/m/081_zm	/people/person/gender	/m/05zppz
/m/034qrh	/film/film/genre	/m/05p553
/m/01rgr	/influence/influence_node/influenced_by	/m/0379s
/m/09sb52	/award/award_category/nominees./award/award_nomination/nominated_for	/m/04b_jc
/m/01jsn5	/education/university/domestic_tuition./measurement_unit/dated_money_value/currency	/m/09nqf
/m/02glc4	/government/legislative_session/members./government/government_position_held/district_represented	/m/03gh4
/m/021mlp	/film/actor/film./film/performance/film	/m/0bykpk
/m/017jd9	/award/award_winning_work/awards_won./award/award_honor/award	/m/09sb52
/m/05m9f9	/award/award_nominee/award_nominations./award/award_nomination/award	/m/0gkr9q
/m/025m8y	/award/award_category/winners./award/award_honor/award_winner	/m/02_jkc
/m/06thjt	/education/educational_institution/students_graduates./education/education/student	/m/05xpv
/m/03xj05	/film/film/other_crew./film/film_crew_gig/film_crew_role	/m/0ch6mp2
/m/03cw411	/film/film/release_date_s./film/film_regional_release_date/film_release_region	/m/015fr
/m/09pjnd	/award/award_winner/awards_won./award/award_honor/award_winner	/m/03h26tm
/m/05lb65	/award/award_winner/awards_won./award/award_honor/award_winner	/m/05lb30
/m/01vw26l	/people/person/gender	/m/05zppz
/m/08cn4_	/award/award_nominee/award_nominations./award/award_nomination/award_nominee	/m/03xkps
/m/01vvydl	/base/schemastaging/person_extra/net_worth./measurement_unit/dated_money_value/currency	/m/09nqf
/m/06thjt	/education/university/local_tuition./measurement_unit/dated_money_value/currency	/m/09nqf
/m/05g7q	/people/person/gender	/m/05zppz
/m/06chvn	/people/person/gender	/m/05zppz
/m/0k4kk	/award/award_winning_work/awards_won./award/award_honor/honored_for	/m/0bcndz
/m/09qvms	/award/award_ceremony/awards_presented./award/award_honor/award_winner	/m/03d9v8
/m/0cl0bk	/award/award_nominee/award_nominations./award/award_nomination/award_nominee	/m/060j8b
/m/01kvrz	/education/educational_institution/students_graduates./education/education/major_field_of_study	/m/064_8sq
/m/01f7kl	/film/film/distributors./film/film_film_distributor_relationship/film_distribution_medium	/m/0dq6p
/m/0gkz15s	/film/film/release_date_s./film/film_regional_release_date/film_release_region	/m/04gzd
/m/027gy0k	/film/film/production_companies	/m/046b0s
/m/0738b8	/base/schemastaging/person_extra/net_worth./measurement_unit/dated_money_value/currency	/m/09nqf
/m/0ktpx	/film/film/genre	/m/09blyk
/m/0404wqb	/people/person/languages	/m/02h40lc
/m/025ljp	/tv/tv_program/languages	/m/02h40lc
/m/014mlp	/education/educational_degree/people_with_this_degree./education/education/student	/m/01p7yb
/m/03r1pr	/award/award_nominee/award_nominations./award/award_nomination/nominated_for	/m/02p76f9
/m/0g2c8	/business/business_operation/revenue./measurement_unit/dated_money_value/currency	/m/09nqf
/m/01d1st	/award/award_nominee/award_nominations./award/award_nomination/award_nominee	/m/04w391
/m/02cl1	/location/statistical_region/rent50_2./measurement_unit/dated_money_value/currency	/m/09nqf
/m/07bzz7	/film/film/release_date_s./film/film_regional_release_date/film_release_region	/m/03gj2
/m/0gnkb	/film/film/language	/m/02h40lc
/m/03jvmp	/award/award_winner/awards_won./award/award_honor/award_winner	/m/0283xx2
/m/02bn75	/people/deceased_person/place_of_death	/m/030qb3t
/m/0drnwh	/award/award_winning_work/awards_won./award/award_honor/award	/m/0gs96
/m/03wj4r8	/film/film/genre	/m/04t36
/m/0l14md	/music/performance_role/regular_performances./music/group_membership/role	/m/05ljv7
/m/040njc	/award/award_category/nominees./award/award_nomination/nominated_for	/m/0k4bc
/m/0dcz8_	/film/film/genre	/m/05p553
/m/0bwfwpj	/film/film/release_date_s./film/film_regional_release_date/film_release_region	/m/0jgx
/m/01ckbq	/award/award_category/category_of	/m/0c4ys
/m/03rwz3	/film/film_distributor/films_distributed./film/film_film_distributor_relationship/film	/m/0879bpq
/m/0140t7	/music/artist/track_contributions./music/track_contribution/role	/m/0l15bq
/m/01713c	/award/award_nominee/award_nominations./award/award_nomination/award	/m/04kxsb
/m/030hcs	/film/actor/film./film/performance/film	/m/027pfg
/m/02qlp4	/film/film/other_crew./film/film_crew_gig/film_crew_role	/m/0ch6mp2
/m/03fbb6	/award/award_nominee/award_nominations./award/award_nomination/award	/m/09qvc0
/m/027zz	/people/person/place_of_birth	/m/02cl1
/m/019bk0	/award/award_ceremony/awards_presented./award/award_honor/award_winner	/m/0197tq
/m/09qvc0	/award/award_category/winners./award/award_honor/ceremony	/m/0lp_cd3
/m/01w9wwg	/people/person/profession	/m/0np9r
/m/01r93l	/award/award_nominee/award_nominations./award/award_nomination/nominated_for	/m/011xg5
/m/02y_lrp	/film/film/other_crew./film/film_crew_gig/film_crew_role	/m/0dxtw
/m/058vfp4	/award/award_nominee/award_nominations./award/award_nomination/award_nominee	/m/076lxv
/m/02cttt	/education/university/local_tuition./measurement_unit/dated_money_value/currency	/m/09nqf
/m/06pj8	/award/award_nominee/award_nominations./award/award_nomination/award	/m/0f_nbyh
/m/023kzp	/award/award_nominee/award_nominations./award/award_nomination/award_nominee	/m/014gf8
/m/01k23t	/award/award_nominee/award_nominations./award/award_nomination/award	/m/0gqz2
/m/01v1d8	/music/performance_role/track_performances./music/track_contribution/role	/m/04q7r
/m/01nms7	/award/award_nominee/award_nominations./award/award_nomination/award_nominee	/m/03k7bd
/m/02bqxb	/film/film/language	/m/02h40lc
/m/017jd9	/award/award_winning_work/awards_won./award/award_honor/award_winner	/m/05bm4sm
/m/01w_10	/organization/organization_member/member_of./organization/organization_membership/organization	/m/04m8fy
/m/049xgc	/award/award_winning_work/awards_won./award/award_honor/award	/m/054krc
/m/0846v	/location/statistical_region/religions./location/religion_percentage/religion	/m/01lp8
/m/026w398	/sports/sports_team/colors	/m/067z2v
/m/018grr	/award/award_nominee/award_nominations./award/award_nomination/nominated_for	/m/07tw_b
/m/01kwsg	/award/award_nominee/award_nominations./award/award_nomination/nominated_for	/m/0qm9n
/m/01j7rd	/award/award_nominee/award_nominations./award/award_nomination/award_nominee	/m/01xdf5
/m/0dgrmp	/sports/sports_position/players./sports/sports_team_roster/team	/m/07b8m1
/m/09f07	/base/biblioness/bibs_location/country	/m/03rk0
/m/027r8p	/film/actor/film./film/performance/film	/m/0422v0
/m/0g9wdmc	/film/film/other_crew./film/film_crew_gig/film_crew_role	/m/09vw2b7
/m/0kpys	/location/location/contains	/m/0r066
/m/03ktjq	/award/award_nominee/award_nominations./award/award_nomination/nominated_for	/m/06rmdr
/m/04gv3db	/film/film/prequel	/m/0bmssv
/m/01wbz9	/award/award_nominee/award_nominations./award/award_nomination/award	/m/02f5qb
/m/01y_px	/film/actor/film./film/performance/film	/m/02bqxb
/m/07y2s	/base/schemastaging/organization_extra/phone_number./base/schemastaging/phone_sandbox/service_location	/m/0b90_r
/m/02r4qs	/people/person/spouse_s./people/marriage/type_of_union	/m/04ztj
/m/09sb52	/award/award_category/nominees./award/award_nomination/nominated_for	/m/01hqhm
/m/019vhk	/film/film/genre	/m/04xvh5
/m/0f25w9	/food/food/nutrients./food/nutrition_fact/nutrient	/m/02kc008
/m/019pm_	/award/award_nominee/award_nominations./award/award_nomination/award_nominee	/m/03_6y
/m/04dn09n	/award/award_category/nominees./award/award_nomination/nominated_for	/m/011ywj
/m/04x8cp	/soccer/football_team/current_roster./sports/sports_team_roster/position	/m/0dgrmp
/m/0gx1673	/award/award_ceremony/awards_presented./award/award_honor/award_winner	/m/06x4l_
/m/01g6l8	/education/educational_institution/colors	/m/036k5h
/m/07_3qd	/music/artist/track_contributions./music/track_contribution/role	/m/02sgy
/m/07y8l9	/award/award_nominee/award_nominations./award/award_nomination/award_nominee	/m/0pgjm
/m/0b6k40	/education/educational_institution/school_type	/m/0m4mb
/m/018n6m	/award/award_nominee/award_nominations./award/award_nomination/award	/m/02f5qb
/m/02607j	/organization/endowed_organization/endowment./measurement_unit/dated_money_value/currency	/m/09nqf
/m/01k2wn	/organization/endowed_organization/endowment./measurement_unit/dated_money_value/currency	/m/09nqf
/m/015dnt	/people/person/spouse_s./people/marriage/type_of_union	/m/04ztj
/m/024tj	/people/person/gender	/m/05zppz
/m/023l9y	/music/artist/track_contributions./music/track_contribution/role	/m/01vdm0
/m/0dc_ms	/film/film/release_date_s./film/film_regional_release_date/film_release_region	/m/04gzd
/m/017y6l	/organization/non_profit_organization/registered_with./organization/non_profit_registration/registering_agency	/m/03z19
/m/014mlp	/education/educational_degree/people_with_this_degree./education/education/institution	/m/01l8t8
/m/01n_g9	/education/educational_institution/students_graduates./education/education/major_field_of_study	/m/02_7t
/m/02n4kr	/media_common/netflix_genre/titles	/m/09gdh6k
/m/01hn_t	/tv/tv_program/regular_cast./tv/regular_tv_appearance/actor	/m/014z8v
/m/054krc	/award/award_category/nominees./award/award_nomination/nominated_for	/m/02p86pb
/m/0f_zkz	/people/person/gender	/m/05zppz
/m/036gdw	/people/person/languages	/m/02h40lc
/m/07nxnw	/film/film/language	/m/02h40lc
/m/05sy_5	/film/film/other_crew./film/film_crew_gig/film_crew_role	/m/0dxtw
/m/0lbd9	/user/jg/default_domain/olympic_games/sports	/m/06z6r
/m/02kxx1	/education/educational_institution/students_graduates./education/education/student	/m/06gn7r
[truncated: 15,986 more rows]
