# Supplementary material
Source: ML conference proceedings conference paper supplement (https://proceedings.neurips.cc/paper_files/paper/2021/hash/0fd600c953cde8121262e322ef09f70e-Abstract.html)
Supplement: Supplementary file 1 [file 0fd600c953cde8121262e322ef09f70e-Supplemental.zip › Supplementary_Material_Paper_8745/data/GraIL-BM_fb237_v3/train/valid.txt]

/m/03zqc1	/award/award_winner/awards_won./award/award_honor/award_winner	/m/05lb87
/m/0k2sk	/film/film/language	/m/02h40lc
/m/014v6f	/people/person/places_lived./people/place_lived/location	/m/0281rp
/m/01wg25j	/people/person/place_of_birth	/m/0rt80
/m/06wjf	/location/administrative_division/country	/m/0d05w3
/m/02k84w	/music/instrument/instrumentalists	/m/01mwsnc
/m/07brj	/music/performance_role/guest_performances./music/recording_contribution/performance_role	/m/0l14qv
/m/0jsqk	/film/film/costume_design_by	/m/02cqbx
/m/06jd89	/soccer/football_team/current_roster./soccer/football_roster_position/position	/m/0dgrmp
/m/0m40d	/music/genre/artists	/m/029ql
/m/0947l	/travel/travel_destination/climate./travel/travel_destination_monthly_climate/month	/m/04wzr
/m/05b4w	/olympics/olympic_participating_country/medals_won./olympics/olympic_medal_honor/olympics	/m/06sks6
/m/0645k5	/film/film/release_date_s./film/film_regional_release_date/film_release_region	/m/05qhw
/m/0j3v	/influence/influence_node/influenced_by	/m/05qmj
/m/0h1cdwq	/film/film/release_date_s./film/film_regional_release_date/film_release_region	/m/04hqz
/m/01w02sy	/film/actor/film./film/performance/film	/m/0q9b0
/m/06c1y	/olympics/olympic_participating_country/athletes./olympics/olympic_athlete_affiliation/olympics	/m/06sks6
/m/05zrx3v	/people/person/employment_history./business/employment_tenure/company	/m/030_1m
/m/03wh49y	/film/film/release_date_s./film/film_regional_release_date/film_release_region	/m/059g4
/m/03_44z	/soccer/football_team/current_roster./soccer/football_roster_position/position	/m/0dgrmp
/m/06t74h	/award/award_nominee/award_nominations./award/award_nomination/award_nominee	/m/05th8t
/m/03hj3b3	/award/award_winning_work/awards_won./award/award_honor/award	/m/0gr4k
/m/019n8z	/user/jg/default_domain/olympic_games/sports	/m/09f6b
/m/0194zl	/film/film/other_crew./film/film_crew_gig/film_crew_role	/m/0ch6mp2
/m/012xdf	/people/person/spouse_s./people/marriage/type_of_union	/m/04ztj
/m/0gbwp	/award/award_nominee/award_nominations./award/award_nomination/award	/m/02f5qb
/m/0gr4k	/award/award_category/nominees./award/award_nomination/nominated_for	/m/011yg9
/m/032md	/people/deceased_person/place_of_death	/m/0k049
/m/02rghbp	/award/award_nominee/award_nominations./award/award_nomination/award_nominee	/m/0275_pj
/m/06w58f	/award/award_nominee/award_nominations./award/award_nomination/award_nominee	/m/02wk_43
/m/018mxj	/base/schemastaging/organization_extra/phone_number./base/schemastaging/phone_sandbox/service_language	/m/064_8sq
/m/0bkq_8	/people/person/spouse_s./people/marriage/type_of_union	/m/04ztj
/m/030qb3t	/travel/travel_destination/climate./travel/travel_destination_monthly_climate/month	/m/04wzr
/m/0d0vqn	/location/statistical_region/gni_per_capita_in_ppp_dollars./measurement_unit/dated_money_value/currency	/m/09nqf
/m/0c5dd	/award/award_winning_work/awards_won./award/award_honor/award	/m/0gr4k
/m/02lgfh	/people/person/gender	/m/05zppz
/m/030qb3t	/location/location/contains	/m/0l1pj
/m/0cbl95	/award/award_winning_work/awards_won./award/award_honor/award_winner	/m/0gv2r
/m/054krc	/award/award_category/nominees./award/award_nomination/nominated_for	/m/017gl1
/m/0crs0b8	/film/film/other_crew./film/film_crew_gig/film_crew_role	/m/0dxtw
/m/06c1y	/olympics/olympic_participating_country/medals_won./olympics/olympic_medal_honor/olympics	/m/0lbd9
/m/07tds	/education/university/local_tuition./measurement_unit/dated_money_value/currency	/m/09nqf
/m/0mkg	/music/instrument/instrumentalists	/m/06rgq
/m/0gs96	/award/award_category/nominees./award/award_nomination/nominated_for	/m/0bmfnjs
/m/01ww_vs	/people/person/spouse_s./people/marriage/type_of_union	/m/04ztj
/m/020ddc	/education/university/domestic_tuition./measurement_unit/dated_money_value/currency	/m/09nqf
/m/016tt2	/film/film_distributor/films_distributed./film/film_film_distributor_relationship/film	/m/06rmdr
/m/019z7q	/influence/influence_node/influenced_by	/m/01pq5j7
/m/06bzwt	/award/award_winner/awards_won./award/award_honor/award_winner	/m/0184jc
/m/0symg	/film/film/costume_design_by	/m/03gt0c5
/m/0488g9	/people/deceased_person/place_of_death	/m/030qb3t
/m/02cl1	/travel/travel_destination/how_to_get_here./travel/transportation/mode_of_transportation	/m/07jdr
/m/0315q3	/people/person/gender	/m/05zppz
/m/081k8	/people/person/spouse_s./people/marriage/type_of_union	/m/04ztj
/m/0ywqc	/award/award_nominee/award_nominations./award/award_nomination/award	/m/0bfvd4
/m/03l3ln	/people/person/languages	/m/02h40lc
/m/063g7l	/people/person/places_lived./people/place_lived/location	/m/0m2rv
/m/02fbpz	/people/person/gender	/m/05zppz
/m/060j8b	/film/actor/film./film/performance/film	/m/076tq0z
/m/017yxq	/people/person/gender	/m/05zppz
/m/072hx4	/film/film/release_date_s./film/film_regional_release_date/film_release_region	/m/0b90_r
/m/07s9rl0	/media_common/netflix_genre/titles	/m/02d413
/m/0377k9	/government/government_office_category/officeholders./government/government_position_held/jurisdiction_of_office	/m/035dk
/m/0cwx_	/organization/endowed_organization/endowment./measurement_unit/dated_money_value/currency	/m/09nqf
/m/05g3b	/american_football/football_team/current_roster./sports/sports_team_roster/position	/m/05zm34
/m/027n4zv	/award/award_winner/awards_won./award/award_honor/award_winner	/m/05lb87
/m/0gz6b6g	/film/film/release_date_s./film/film_regional_release_date/film_release_region	/m/0jgd
/m/05q8pss	/award/award_category/nominees./award/award_nomination/nominated_for	/m/0419kt
/m/0dv9v	/base/biblioness/bibs_location/country	/m/0chghy
/m/02t__l	/award/award_nominee/award_nominations./award/award_nomination/award	/m/08_vwq
/m/03rk0	/base/aareas/schema/administrative_area/administrative_parent	/m/02j71
/m/05m_8	/sports/professional_sports_team/draft_picks./sports/sports_league_draft_pick/draft	/m/02x2khw
/m/02s6sh	/music/artist/contribution./music/recording_contribution/performance_role	/m/0l14qv
/m/0mdqp	/film/actor/film./film/performance/film	/m/0bmssv
/m/09sb52	/award/award_category/winners./award/award_honor/award_winner	/m/0h1nt
/m/017xm3	/people/person/languages	/m/02h40lc
/m/0m31m	/people/person/spouse_s./people/marriage/type_of_union	/m/04ztj
/m/01718w	/film/film/estimated_budget./measurement_unit/dated_money_value/currency	/m/09nqf
/m/0bykpk	/film/film/produced_by	/m/01b9ck
/m/0bqvs2	/base/schemastaging/person_extra/net_worth./measurement_unit/dated_money_value/currency	/m/09nqf
/m/0lbd9	/user/jg/default_domain/olympic_games/sports	/m/0crlz
/m/013b2h	/award/award_ceremony/awards_presented./award/award_honor/award_winner	/m/018n6m
/m/01w7nwm	/music/artist/track_contributions./music/track_contribution/role	/m/0l15bq
/m/019pm_	/award/award_winner/awards_won./award/award_honor/award_winner	/m/048lv
/m/01j_06	/education/university/local_tuition./measurement_unit/dated_money_value/currency	/m/09nqf
/m/0mgkg	/base/schemastaging/organization_extra/phone_number./base/schemastaging/phone_sandbox/contact_category	/m/03w5xm
/m/02zr0z	/business/business_operation/assets./measurement_unit/dated_money_value/currency	/m/09nqf
/m/01v5h	/film/director/film	/m/0k4kk
/m/01242_	/film/film/other_crew./film/film_crew_gig/film_crew_role	/m/0dxtw
/m/0gr4k	/award/award_category/nominees./award/award_nomination/nominated_for	/m/017jd9
/m/01cmp9	/film/film/other_crew./film/film_crew_gig/film_crew_role	/m/09vw2b7
/m/03_b1g	/tv/tv_program/languages	/m/02h40lc
/m/0209hj	/film/film/genre	/m/07s9rl0
/m/0qm9n	/film/film/release_date_s./film/film_regional_release_date/film_release_region	/m/03gj2
/m/0fphgb	/film/film/release_date_s./film/film_regional_release_date/film_release_region	/m/0jgd
/m/024rbz	/film/film_distributor/films_distributed./film/film_film_distributor_relationship/film	/m/0gyh2wm
/m/0fpj4lx	/people/person/profession	/m/016z4k
/m/0bqvs2	/people/person/gender	/m/05zppz
/m/0154j	/location/statistical_region/gdp_nominal_per_capita./measurement_unit/dated_money_value/currency	/m/09nqf
/m/016vg8	/film/actor/film./film/performance/film	/m/02qlp4
/m/014g_s	/people/person/gender	/m/05zppz
/m/0gkd1	/music/performance_role/track_performances./music/track_contribution/role	/m/0mkg
/m/059f4	/location/location/contains	/m/02hp70
/m/05qsxy	/award/award_nominee/award_nominations./award/award_nomination/award_nominee	/m/02rghbp
/m/01963w	/award/award_nominee/award_nominations./award/award_nomination/award	/m/0262x6
/m/04dn09n	/award/award_category/nominees./award/award_nomination/nominated_for	/m/07jnt
/m/01dw4q	/award/award_nominee/award_nominations./award/award_nomination/award_nominee	/m/026zvx7
/m/0cj36c	/award/award_nominee/award_nominations./award/award_nomination/award_nominee	/m/083chw
/m/0r4wn	/location/hud_county_place/county	/m/0l2rj
/m/0cm2xh	/military/military_conflict/combatants./military/military_combatant_group/combatants	/m/0f8l9c
/m/0bl06	/film/film/language	/m/02h40lc
/m/0gz6b6g	/film/film/release_date_s./film/film_regional_release_date/film_release_region	/m/06t2t
/m/06s7rd	/base/schemastaging/person_extra/net_worth./measurement_unit/dated_money_value/currency	/m/09nqf
/m/02klny	/education/university/local_tuition./measurement_unit/dated_money_value/currency	/m/09nqf
/m/02x258x	/award/award_category/nominees./award/award_nomination/nominated_for	/m/0m313
/m/0170th	/film/film/genre	/m/03bxz7
/m/0chghy	/olympics/olympic_participating_country/medals_won./olympics/olympic_medal_honor/olympics	/m/06sks6
/m/0686zv	/award/award_winner/awards_won./award/award_honor/award_winner	/m/02qgyv
/m/01pcdn	/award/award_nominee/award_nominations./award/award_nomination/award_nominee	/m/015c2f
/m/0g2lq	/people/person/profession	/m/0dxtg
/m/01vsy3q	/people/person/places_lived./people/place_lived/location	/m/0d9jr
/m/0854hr	/people/person/gender	/m/05zppz
/m/02mgp	/education/field_of_study/students_majoring./education/education/major_field_of_study	/m/02j8z
/m/0661m4p	/film/film/language	/m/02h40lc
/m/06cgy	/film/actor/film./film/performance/film	/m/0jqj5
/m/0f4_l	/film/film/genre	/m/0vgkd
/m/09_2gj	/people/person/spouse_s./people/marriage/type_of_union	/m/04ztj
/m/0cj2k3	/award/award_nominee/award_nominations./award/award_nomination/award_nominee	/m/08hsww
/m/0cp0ph6	/film/film/release_date_s./film/film_regional_release_date/film_release_region	/m/0d0vqn
/m/04rwx	/education/educational_institution/students_graduates./education/education/student	/m/0hfml
/m/0d3k14	/people/person/spouse_s./people/marriage/type_of_union	/m/04ztj
/m/01stzp	/education/educational_institution/students_graduates./education/education/student	/m/0nk72
/m/01q_ph	/award/award_nominee/award_nominations./award/award_nomination/award_nominee	/m/01y_px
/m/065jlv	/award/award_nominee/award_nominations./award/award_nomination/award_nominee	/m/03v3xp
/m/04mhxx	/film/actor/film./film/performance/film	/m/0gz6b6g
/m/05vsxz	/award/award_nominee/award_nominations./award/award_nomination/award_nominee	/m/020_95
/m/0645k5	/film/film/other_crew./film/film_crew_gig/film_crew_role	/m/0ch6mp2
/m/01p4vl	/award/award_nominee/award_nominations./award/award_nomination/award_nominee	/m/03_6y
/m/09p4w8	/film/film/other_crew./film/film_crew_gig/film_crew_role	/m/0ch6mp2
/m/014knw	/film/film/music	/m/02wb6d
/m/049k07	/award/award_winner/awards_won./award/award_honor/award_winner	/m/03m8lq
/m/02sfnv	/film/film/estimated_budget./measurement_unit/dated_money_value/currency	/m/09nqf
/m/06s7rd	/award/award_nominee/award_nominations./award/award_nomination/award	/m/02f73b
/m/0k20s	/film/film/country	/m/0f8l9c
/m/0283d	/music/genre/parent_genre	/m/06__c
/m/02wtp6	/film/film/release_date_s./film/film_regional_release_date/film_release_region	/m/0h7x
/m/05k4my	/film/film/genre	/m/05p553
/m/0686zv	/people/person/spouse_s./people/marriage/type_of_union	/m/04ztj
/m/02j416	/education/university/domestic_tuition./measurement_unit/dated_money_value/currency	/m/09nqf
/m/05qhw	/military/military_combatant/military_conflicts./military/military_combatant_group/combatants	/m/087vz
/m/0bfvd4	/award/award_category/winners./award/award_honor/award_winner	/m/031k24
/m/0633p0	/award/award_nominee/award_nominations./award/award_nomination/award	/m/01l78d
/m/0h3mh3q	/tv/tv_program/genre	/m/07s9rl0
/m/0b90_r	/military/military_combatant/military_conflicts./military/military_combatant_group/combatants	/m/087vz
/m/016tt2	/film/film_distributor/films_distributed./film/film_film_distributor_relationship/film	/m/01hw5kk
/m/01p4vl	/award/award_nominee/award_nominations./award/award_nomination/award_nominee	/m/04w391
/m/06bd5j	/film/film/genre	/m/02n4kr
/m/0fby2t	/award/award_nominee/award_nominations./award/award_nomination/award	/m/0c422z4
/m/069vt	/business/business_operation/industry	/m/0vg8
/m/01qg7c	/people/person/spouse_s./people/marriage/type_of_union	/m/04ztj
/m/079vf	/film/actor/film./film/performance/film	/m/0fqt1ns
/m/01vw26l	/people/person/religion	/m/0flw86
/m/0fphgb	/film/film/country	/m/0f8l9c
/m/016z7s	/film/film/film_production_design_by	/m/04kj2v
/m/07s9rl0	/media_common/netflix_genre/titles	/m/0_b9f
/m/045j3w	/film/film/release_date_s./film/film_regional_release_date/film_release_region	/m/015fr
/m/05g8pg	/film/film/film_format	/m/07fb8_
/m/02xbyr	/film/film/genre	/m/01zhp
/m/0lccn	/award/award_nominee/award_nominations./award/award_nomination/award_nominee	/m/045zr
/m/03j3pg9	/award/award_nominee/award_nominations./award/award_nomination/award_nominee	/m/01wbsdz
/m/05zm34	/sports/sports_position/players./sports/sports_team_roster/team	/m/0g0z58
/m/04kxsb	/award/award_category/nominees./award/award_nomination/nominated_for	/m/0ggbhy7
/m/01rzqj	/film/actor/film./film/performance/film	/m/025ts_z
/m/04wg38	/award/award_nominee/award_nominations./award/award_nomination/award_nominee	/m/03fbb6
/m/054ks3	/award/award_category/winners./award/award_honor/award_winner	/m/016jll
/m/0f8l9c	/military/military_combatant/military_conflicts./military/military_combatant_group/combatants	/m/0bq0p9
/m/01vs8ng	/film/actor/film./film/performance/film	/m/0dh8v4
/m/05842k	/music/performance_role/track_performances./music/track_contribution/role	/m/01vdm0
/m/04rwx	/education/educational_institution/students_graduates./education/education/major_field_of_study	/m/01tbp
/m/01j_9c	/education/educational_institution/students_graduates./education/education/student	/m/02779r4
/m/05m_8	/sports/professional_sports_team/draft_picks./sports/sports_league_draft_pick/draft	/m/02rl201
/m/045bg	/influence/influence_node/influenced_by	/m/05qmj
/m/04ztj	/people/marriage_union_type/unions_of_this_type./people/marriage/location_of_ceremony	/m/07tcs
/m/0544vh	/soccer/football_team/current_roster./soccer/football_roster_position/position	/m/0dgrmp
/m/024rbz	/film/film_distributor/films_distributed./film/film_film_distributor_relationship/film	/m/02704ff
/m/030hcs	/people/person/gender	/m/05zppz
/m/015bpl	/film/film/estimated_budget./measurement_unit/dated_money_value/currency	/m/09nqf
/m/039xcr	/film/actor/film./film/performance/film	/m/03bdkd
/m/03xq0f	/film/film_distributor/films_distributed./film/film_film_distributor_relationship/film	/m/03h3x5
/m/0m593	/people/person/places_lived./people/place_lived/location	/m/013jz2
/m/017jd9	/film/film/story_by	/m/041h0
/m/021yw7	/award/award_nominee/award_nominations./award/award_nomination/award	/m/0cjcbg
/m/07s9rl0	/media_common/netflix_genre/titles	/m/0_9wr
/m/02rybfn	/people/person/gender	/m/05zppz
/m/02wgln	/people/person/spouse_s./people/marriage/type_of_union	/m/04ztj
/m/040nwr	/people/person/languages	/m/02h40lc
/m/05zm34	/sports/sports_position/players./sports/sports_team_roster/team	/m/057xkj_
/m/01xpxv	/people/person/spouse_s./people/marriage/type_of_union	/m/04ztj
/m/07qg8v	/film/film/release_date_s./film/film_regional_release_date/film_release_region	/m/0h7x
/m/06thjt	/education/educational_institution/students_graduates./education/education/student	/m/0fby2t
/m/07g9f	/tv/tv_program/genre	/m/02n4kr
/m/024rbz	/film/film_distributor/films_distributed./film/film_film_distributor_relationship/film	/m/0bh8drv
/m/02pprs	/music/performance_role/track_performances./music/track_contribution/role	/m/05842k
/m/013yq	/travel/travel_destination/climate./travel/travel_destination_monthly_climate/month	/m/04wzr
/m/03q45x	/base/saturdaynightlive/snl_cast_member/seasons./base/saturdaynightlive/snl_season_tenure/cast_members	/m/04s430
/m/01k_n63	/award/award_nominee/award_nominations./award/award_nomination/award_nominee	/m/0168cl
/m/017gl1	/film/film/release_date_s./film/film_regional_release_date/film_release_region	/m/06npd
/m/06dfz1	/tv/tv_program/languages	/m/064_8sq
/m/03vhvp	/award/award_nominee/award_nominations./award/award_nomination/award	/m/01bgqh
/m/02rrsz	/people/person/spouse_s./people/marriage/type_of_union	/m/04ztj
/m/02wyc0	/people/person/nationality	/m/03rk0
/m/019fz	/organization/organization_member/member_of./organization/organization_membership/organization	/m/02_l9
/m/04gzd	/location/statistical_region/gdp_nominal_per_capita./measurement_unit/dated_money_value/currency	/m/09nqf
/m/0cj36c	/award/award_nominee/award_nominations./award/award_nomination/award_nominee	/m/060j8b
/m/0f4_l	/film/film/featured_film_locations	/m/030qb3t
/m/0c40vxk	/film/film/release_date_s./film/film_regional_release_date/film_release_region	/m/06t2t
/m/0645k5	/film/film/genre	/m/026ny
/m/03r0rq	/tv/tv_program/regular_cast./tv/regular_tv_appearance/actor	/m/02tqkf
/m/0d8h4	/location/administrative_division/first_level_division_of	/m/0f8l9c
/m/03xf_m	/award/award_winning_work/awards_won./award/award_honor/award	/m/04kxsb
/m/07lp1	/influence/influence_node/influenced_by	/m/03jxw
/m/054ky1	/award/award_category/winners./award/award_honor/award_winner	/m/01v5h
/m/05p09zm	/award/award_category/winners./award/award_honor/award_winner	/m/07ldhs
/m/0bs5k8r	/film/film/genre	/m/02l7c8
/m/01rr_d	/education/educational_degree/people_with_this_degree./education/education/institution	/m/02w6bq
/m/0bwjj	/sports/professional_sports_team/draft_picks./sports/sports_league_draft_pick/draft	/m/038c0q
/m/03cv_gy	/award/award_winning_work/awards_won./award/award_honor/award_winner	/m/020_95
/m/023jq1	/people/person/gender	/m/05zppz
/m/01679d	/music/performance_role/track_performances./music/track_contribution/role	/m/02sgy
/m/09l0x9	/sports/sports_league_draft/picks./sports/sports_league_draft_pick/school	/m/01j_9c
/m/0gvvf4j	/film/film/other_crew./film/film_crew_gig/film_crew_role	/m/0ch6mp2
/m/08hsww	/award/award_winner/awards_won./award/award_honor/award_winner	/m/060j8b
/m/0bs8d	/award/award_nominee/award_nominations./award/award_nomination/nominated_for	/m/097zcz
/m/0l14j_	/music/performance_role/guest_performances./music/recording_contribution/performance_role	/m/02pprs
/m/07x4qr	/film/film/release_date_s./film/film_regional_release_date/film_release_region	/m/06qd3
/m/0d05q4	/location/country/form_of_government	/m/06cx9
/m/0fqjhm	/award/award_nominee/award_nominations./award/award_nomination/award_nominee	/m/019pm_
/m/0343h	/film/director/film	/m/0hv8w
/m/0d87hc	/film/film/language	/m/02h40lc
/m/025b5y	/award/award_nominee/award_nominations./award/award_nomination/nominated_for	/m/0bvn25
/m/016s0m	/people/person/profession	/m/016z4k
/m/0cttx	/soccer/football_team/current_roster./soccer/football_roster_position/position	/m/0dgrmp
/m/07r4c	/award/award_nominee/award_nominations./award/award_nomination/award	/m/01ckbq
/m/02l4pj	/award/award_winner/awards_won./award/award_honor/award_winner	/m/04bdxl
/m/076psv	/award/award_winner/awards_won./award/award_honor/award_winner	/m/0579tg2
/m/0dyztm	/award/award_winner/awards_won./award/award_honor/award_winner	/m/02l6dy
/m/03ldxq	/base/schemastaging/person_extra/net_worth./measurement_unit/dated_money_value/currency	/m/09nqf
/m/01w9wwg	/award/award_nominee/award_nominations./award/award_nomination/award	/m/02nhxf
/m/03_dj	/people/person/gender	/m/05zppz
/m/01pr6q7	/people/person/profession	/m/01c72t
/m/09sb52	/award/award_category/winners./award/award_honor/award_winner	/m/02l4pj
/m/01p4vl	/award/award_nominee/award_nominations./award/award_nomination/award_nominee	/m/016vg8
/m/01w3v	/organization/endowed_organization/endowment./measurement_unit/dated_money_value/currency	/m/09nqf
/m/01fs__	/tv/tv_program/languages	/m/02h40lc
/m/09p0ct	/film/film/other_crew./film/film_crew_gig/film_crew_role	/m/0ch6mp2
/m/0cjdk	/tv/tv_network/programs./tv/tv_network_duration/program	/m/0170k0
/m/0l14md	/music/performance_role/track_performances./music/track_contribution/role	/m/01rhl
/m/04g9gd	/film/film/estimated_budget./measurement_unit/dated_money_value/currency	/m/09nqf
/m/05th8t	/film/actor/film./film/performance/film	/m/0cfhfz
/m/01nn79	/organization/organization/headquarters./location/mailing_address/state_province_region	/m/01vsb_
/m/01k23t	/people/person/profession	/m/016z4k
/m/0233bn	/film/film/release_date_s./film/film_regional_release_date/film_release_region	/m/05b4w
/m/07f5x	/location/statistical_region/gdp_real./measurement_unit/adjusted_money_value/adjustment_currency	/m/09nqf
/m/011yxy	/award/award_winning_work/awards_won./award/award_honor/award_winner	/m/05dppk
/m/0181hw	/business/business_operation/industry	/m/04rlf
/m/04ztj	/people/marriage_union_type/unions_of_this_type./people/marriage/location_of_ceremony	/m/06sw9
/m/01nms7	/film/actor/film./film/performance/film	/m/04jm_hq
/m/03dpqd	/film/actor/film./film/performance/film	/m/0fgrm
/m/04smkr	/people/person/places_lived./people/place_lived/location	/m/030qb3t
/m/0b7xl8	/award/award_winner/awards_won./award/award_honor/award_winner	/m/05jjl
/m/0234_c	/education/university/local_tuition./measurement_unit/dated_money_value/currency	/m/09nqf
/m/04mx7s	/people/person/spouse_s./people/marriage/type_of_union	/m/04ztj
/m/07q1v4	/music/artist/track_contributions./music/track_contribution/role	/m/01vdm0
/m/01pcj4	/business/business_operation/assets./measurement_unit/dated_money_value/currency	/m/09nqf
/m/06182p	/education/university/domestic_tuition./measurement_unit/dated_money_value/currency	/m/09nqf
/m/0gx1673	/time/event/locations	/m/030qb3t
/m/036b_	/location/country/form_of_government	/m/06cx9
/m/05qhw	/olympics/olympic_participating_country/medals_won./olympics/olympic_medal_honor/olympics	/m/0lbd9
/m/02rdxsh	/award/award_category/nominees./award/award_nomination/nominated_for	/m/0f4_l
/m/013yq	/travel/travel_destination/how_to_get_here./travel/transportation/mode_of_transportation	/m/07jdr
/m/016kv6	/film/film/estimated_budget./measurement_unit/dated_money_value/currency	/m/09nqf
/m/02y_2y	/people/person/spouse_s./people/marriage/type_of_union	/m/04ztj
/m/0mdqp	/film/actor/film./film/performance/film	/m/0b3n61
/m/0bv8h2	/film/film/genre	/m/02l7c8
/m/01nkt	/food/food/nutrients./food/nutrition_fact/nutrient	/m/09pbb
/m/05_5rjx	/film/film/genre	/m/07s9rl0
/m/07bzz7	/film/film/release_date_s./film/film_regional_release_date/film_release_region	/m/0f8l9c
/m/01679d	/music/performance_role/regular_performances./music/group_membership/role	/m/0xzly
/m/016jll	/people/person/profession	/m/01c72t
/m/04thp	/location/statistical_region/gdp_nominal_per_capita./measurement_unit/dated_money_value/currency	/m/09nqf
/m/02nt3d	/film/film/genre	/m/05p553
/m/01l1hr	/film/actor/film./film/performance/film	/m/02qk3fk
/m/0c7t58	/award/award_winner/awards_won./award/award_honor/award_winner	/m/05m9f9
/m/0p_pd	/award/award_nominee/award_nominations./award/award_nomination/award_nominee	/m/0h7pj
/m/02ylg6	/film/film/release_date_s./film/film_regional_release_date/film_release_region	/m/0jgd
/m/05css_	/film/film/genre	/m/02l7c8
/m/0k0rf	/film/film/estimated_budget./measurement_unit/dated_money_value/currency	/m/09nqf
/m/06r2_	/film/film/other_crew./film/film_crew_gig/film_crew_role	/m/09vw2b7
/m/01p7yb	/film/actor/film./film/performance/film	/m/02704ff
/m/05c26ss	/film/film/release_date_s./film/film_regional_release_date/film_release_region	/m/06qd3
/m/02vyh	/award/award_nominee/award_nominations./award/award_nomination/award_nominee	/m/0m593
/m/05y7hc	/award/award_nominee/award_nominations./award/award_nomination/award	/m/025m8y
/m/01q940	/music/record_label/artist	/m/01l1sq
/m/05sy2k_	/tv/tv_program/languages	/m/02h40lc
/m/02wszf	/sports/sports_position/players./sports/sports_team_roster/team	/m/02__x
/m/0gqz2	/award/award_category/winners./award/award_honor/ceremony	/m/02hn5v
/m/01gvr1	/award/award_winner/awards_won./award/award_honor/award_winner	/m/027f7dj
/m/05vsb7	/sports/sports_league_draft/picks./sports/sports_league_draft_pick/school	/m/0hd7j
/m/0gtvpkw	/film/film/release_date_s./film/film_regional_release_date/film_release_region	/m/05qhw
/m/0mdqp	/film/actor/film./film/performance/film	/m/02nt3d
/m/07fvf1	/award/award_winner/awards_won./award/award_honor/award_winner	/m/01h910
/m/03jht	/award/award_nominee/award_nominations./award/award_nomination/award	/m/0ddd9
/m/017l4	/people/person/spouse_s./people/marriage/type_of_union	/m/04ztj
/m/0cjdk	/tv/tv_network/programs./tv/tv_network_duration/program	/m/025ljp
/m/09wj5	/award/award_winner/awards_won./award/award_honor/award_winner	/m/01ps2h8
/m/0gy0l_	/film/film/language	/m/02h40lc
/m/015t56	/award/award_nominee/award_nominations./award/award_nomination/award_nominee	/m/01p4vl
/m/02n72k	/award/award_nominated_work/award_nominations./award/award_nomination/nominated_for	/m/0d1qmz
/m/03ktjq	/award/award_nominee/award_nominations./award/award_nomination/award_nominee	/m/016tt2
/m/0q9b0	/film/film/other_crew./film/film_crew_gig/film_crew_role	/m/0ch6mp2
/m/02lyr4	/sports/sports_position/players./sports/sports_team_roster/team	/m/0x0d
/m/0d7wh	/people/ethnicity/languages_spoken	/m/03x42
/m/084302	/film/film/estimated_budget./measurement_unit/dated_money_value/currency	/m/09nqf
/m/02mmwk	/film/film/other_crew./film/film_crew_gig/film_crew_role	/m/0dxtw
/m/0jqj5	/award/award_winning_work/awards_won./award/award_honor/award	/m/02w_6xj
/m/04ztj	/people/marriage_union_type/unions_of_this_type./people/marriage/location_of_ceremony	/m/01w2v
/m/0dgrmp	/sports/sports_position/players./sports/sports_team_roster/team	/m/0177gl
/m/040rjq	/people/person/place_of_birth	/m/0n920
/m/06c1y	/location/statistical_region/gdp_nominal_per_capita./measurement_unit/dated_money_value/currency	/m/09nqf
/m/0gq6s3	/award/award_category/nominees./award/award_nomination/nominated_for	/m/06823p
/m/02gkzs	/government/legislative_session/members./government/government_position_held/legislative_sessions	/m/03rtmz
/m/02qgqt	/award/award_nominee/award_nominations./award/award_nomination/award_nominee	/m/0408np
/m/0g2lq	/people/person/languages	/m/02h40lc
/m/015qyf	/award/award_nominee/award_nominations./award/award_nomination/award	/m/0bp_b2
/m/0m31m	/people/person/religion	/m/0c8wxp
/m/02d02	/baseball/baseball_team/team_stats./baseball/baseball_team_stats/season	/m/026fmqm
/m/0c9l1	/award/award_nominee/award_nominations./award/award_nomination/award	/m/02f5qb
/m/05zvq6g	/award/award_category/nominees./award/award_nomination/nominated_for	/m/03cw411
/m/07jnt	/film/film/genre	/m/07s9rl0
/m/05znbh7	/award/award_winning_work/awards_won./award/award_honor/award_winner	/m/02wk4d
/m/01qbl	/music/performance_role/track_performances./music/track_contribution/role	/m/03qlv7
/m/0h5jg5	/award/award_nominee/award_nominations./award/award_nomination/nominated_for	/m/0828jw
/m/0338g8	/people/person/profession	/m/0dxtg
/m/026mfs	/award/award_category/category_of	/m/0c4ys
/m/040z9	/people/deceased_person/place_of_death	/m/030qb3t
/m/06c1y	/organization/organization_member/member_of./organization/organization_membership/organization	/m/02jxk
/m/0btbyn	/film/film/genre	/m/07s9rl0
/m/05489	/film/film_subject/films	/m/0pd64
/m/02wb6d	/people/person/profession	/m/01c72t
/m/02ppg1r	/tv/tv_program/regular_cast./tv/regular_tv_appearance/actor	/m/0kryqm
/m/0prjs	/film/director/film	/m/016ywb
/m/030_1m	/film/film_distributor/films_distributed./film/film_film_distributor_relationship/film	/m/08rr3p
/m/03xp8d5	/award/award_nominee/award_nominations./award/award_nomination/award_nominee	/m/08qvhv
/m/0f8l9c	/media_common/netflix_genre/titles	/m/07qg8v
/m/02s6sh	/music/artist/track_contributions./music/track_contribution/role	/m/01vdm0
/m/01zh29	/base/popstra/celebrity/friendship./base/popstra/friendship/participant	/m/03t8v3
/m/02bqvs	/film/film/language	/m/02h40lc
/m/03ncb2	/award/award_category/winners./award/award_honor/ceremony	/m/09n4nb
/m/05c4fys	/sports/pro_athlete/teams./sports/sports_team_roster/team	/m/02b1mc
/m/018ljb	/olympics/olympic_games/sports	/m/0d1tm
/m/01vv6_6	/music/group_member/membership./music/group_membership/role	/m/028tv0
/m/0gr4k	/award/award_category/winners./award/award_honor/ceremony	/m/0bzm__
/m/01pcvn	/base/popstra/celebrity/dated./base/popstra/dated/participant	/m/06crng
/m/0661ql3	/film/film/genre	/m/02n4kr
/m/0cq806	/film/film/estimated_budget./measurement_unit/dated_money_value/currency	/m/09nqf
/m/0755wz	/award/award_winner/awards_won./award/award_honor/award_winner	/m/01z7_f
/m/05c46y6	/film/film/language	/m/02h40lc
/m/048wrb	/people/person/gender	/m/05zppz
/m/02_jkc	/people/person/profession	/m/01c72t
/m/01qq_lp	/award/award_winner/awards_won./award/award_honor/award_winner	/m/0157m
/m/01gglm	/film/film/language	/m/02h40lc
/m/04l3_z	/people/person/spouse_s./people/marriage/type_of_union	/m/04ztj
/m/0mgkg	/business/business_operation/operating_income./measurement_unit/dated_money_value/currency	/m/09nqf
/m/02qyntr	/award/award_category/nominees./award/award_nomination/nominated_for	/m/06cm5
/m/03qk20	/music/record_label/artist	/m/07rnh
/m/0jtg0	/music/performance_role/track_performances./music/track_contribution/role	/m/0l15bq
/m/06cgy	/award/award_nominee/award_nominations./award/award_nomination/nominated_for	/m/0jqj5
/m/0mbhr	/people/person/spouse_s./people/marriage/type_of_union	/m/04ztj
/m/0gvvf4j	/film/film/release_date_s./film/film_regional_release_date/film_release_region	/m/05qhw
/m/013q07	/film/film/language	/m/02h40lc
/m/0d29z	/people/ethnicity/geographic_distribution	/m/06qd3
/m/047yc	/location/location/adjoin_s./location/adjoining_relationship/adjoins	/m/0d05q4
/m/016s0m	/music/artist/track_contributions./music/track_contribution/role	/m/02sgy
/m/02vwckw	/base/schemastaging/person_extra/net_worth./measurement_unit/dated_money_value/currency	/m/09nqf
/m/02fgdx	/base/schemastaging/organization_extra/phone_number./base/schemastaging/phone_sandbox/contact_category	/m/03w5xm
/m/020wyp	/sports/sports_team/colors	/m/038hg
/m/023kzp	/people/person/places_lived./people/place_lived/location	/m/0f2v0
/m/01vvb4m	/award/award_nominee/award_nominations./award/award_nomination/award_nominee	/m/0dqmt0
/m/02wgk1	/film/film/story_by	/m/079vf
/m/04cbbz	/film/film/language	/m/06b_j
/m/09sdmz	/award/award_category/winners./award/award_honor/award_winner	/m/055c8
/m/0d0vqn	/olympics/olympic_participating_country/athletes./olympics/olympic_athlete_affiliation/olympics	/m/0jhn7
/m/02_xgp2	/education/educational_degree/people_with_this_degree./education/education/institution	/m/0bx8pn
/m/05n6sq	/film/film/genre	/m/03bxz7
/m/016gkf	/people/person/profession	/m/0dxtg
/m/09nz_c	/people/person/gender	/m/05zppz
/m/01g969	/award/award_nominee/award_nominations./award/award_nomination/award	/m/05p09zm
/m/073h9x	/award/award_ceremony/awards_presented./award/award_honor/award_winner	/m/03r1pr
/m/01kgg9	/base/popstra/celebrity/dated./base/popstra/dated/participant	/m/0bkmf
/m/07c72	/tv/tv_program/regular_cast./tv/regular_tv_appearance/actor	/m/01h910
/m/07ym0	/influence/influence_node/influenced_by	/m/05qmj
/m/011yg9	/film/film/language	/m/02h40lc
/m/03vgp7	/people/person/place_of_birth	/m/06_kh
/m/05ywg	/travel/travel_destination/how_to_get_here./travel/transportation/mode_of_transportation	/m/07jdr
/m/0f_y9	/people/person/spouse_s./people/marriage/type_of_union	/m/04ztj
/m/0dgrmp	/sports/sports_position/players./sports/sports_team_roster/team	/m/03c0vy
/m/01hqhm	/film/film/genre	/m/07s9rl0
/m/0509bl	/award/award_nominee/award_nominations./award/award_nomination/nominated_for	/m/0b76kw1
/m/029b9k	/people/person/spouse_s./people/marriage/type_of_union	/m/04ztj
/m/025tdwc	/people/person/profession	/m/028kk_
/m/01hb6v	/influence/influence_node/influenced_by	/m/0ff3y
/m/08hp53	/people/person/profession	/m/0dxtg
/m/01wdj_	/education/educational_institution/students_graduates./education/education/student	/m/0168cl
/m/01vd7hn	/award/award_winner/awards_won./award/award_honor/award_winner	/m/0jdhp
/m/02ck7w	/award/award_nominee/award_nominations./award/award_nomination/nominated_for	/m/017jd9
/m/0bs5k8r	/film/film/country	/m/0chghy
/m/04rcr	/award/award_nominee/award_nominations./award/award_nomination/award	/m/02f72n
/m/01p970	/music/performance_role/track_performances./music/track_contribution/role	/m/01qbl
/m/04m2zj	/music/artist/contribution./music/recording_contribution/performance_role	/m/03gvt
/m/017yxq	/award/award_nominee/award_nominations./award/award_nomination/award	/m/05p09zm
/m/01p4vl	/award/award_nominee/award_nominations./award/award_nomination/award_nominee	/m/014gf8
/m/05hjnw	/film/film/genre	/m/02l7c8
/m/02pzc4	/people/person/gender	/m/05zppz
/m/0c38gj	/film/film/other_crew./film/film_crew_gig/film_crew_role	/m/0dxtw
/m/02rnns	/people/person/gender	/m/05zppz
/m/06bd5j	/film/film/film_format	/m/07fb8_
/m/06q8qh	/film/film/film_festivals	/m/0hrcs29
/m/03np_7	/education/university/local_tuition./measurement_unit/dated_money_value/currency	/m/09nqf
/m/01hxs4	/award/award_nominee/award_nominations./award/award_nomination/award	/m/0bp_b2
/m/09p5mwg	/film/film/genre	/m/01585b
/m/03q2t9	/award/award_nominee/award_nominations./award/award_nomination/award	/m/01cw51
/m/0bh8yn3	/film/film/other_crew./film/film_crew_gig/film_crew_role	/m/09vw2b7
/m/0gtvrv3	/film/film/release_date_s./film/film_regional_release_date/film_release_region	/m/0f8l9c
/m/02l0xc	/people/person/religion	/m/0c8wxp
/m/04wp3s	/base/schemastaging/person_extra/net_worth./measurement_unit/dated_money_value/currency	/m/09nqf
/m/011_6p	/music/performance_role/track_performances./music/track_contribution/role	/m/01vdm0
/m/01c22t	/film/film/release_date_s./film/film_regional_release_date/film_release_region	/m/015fr
/m/011yg9	/film/film/genre	/m/07s9rl0
/m/02gyl0	/people/person/places_lived./people/place_lived/location	/m/0fhp9
/m/0gh65c5	/film/film/release_date_s./film/film_regional_release_date/film_release_region	/m/0154j
/m/03s2dj	/film/actor/film./film/performance/film	/m/048tv9
/m/02gx2k	/award/award_category/winners./award/award_honor/ceremony	/m/09n4nb
/m/015fr	/location/statistical_region/gdp_nominal./measurement_unit/dated_money_value/currency	/m/09nqf
/m/04jkpgv	/film/film/release_date_s./film/film_regional_release_date/film_release_region	/m/0154j
/m/015nhn	/people/person/spouse_s./people/marriage/type_of_union	/m/04ztj
/m/05842k	/music/performance_role/track_performances./music/track_contribution/role	/m/06rvn
/m/01tspc6	/award/award_nominee/award_nominations./award/award_nomination/nominated_for	/m/0m313
/m/04dn09n	/award/award_category/nominees./award/award_nomination/nominated_for	/m/0_b9f
/m/0mkg	/music/performance_role/regular_performances./music/group_membership/role	/m/0l14md
/m/04smdd	/film/film/genre	/m/07s9rl0
/m/01pcj4	/education/university/domestic_tuition./measurement_unit/dated_money_value/currency	/m/09nqf
/m/0dgrmp	/sports/sports_position/players./sports/sports_team_roster/team	/m/0cttx
/m/01g7_r	/education/educational_institution/students_graduates./education/education/student	/m/0bw87
/m/07tw_b	/film/film/genre	/m/0hn10
/m/01hr1	/film/film/genre	/m/0556j8
/m/0frq6	/food/food/nutrients./food/nutrition_fact/nutrient	/m/025tkqy
/m/02brqp	/base/schemastaging/organization_extra/phone_number./base/schemastaging/phone_sandbox/contact_category	/m/03w5xm
/m/0k269	/people/person/spouse_s./people/marriage/location_of_ceremony	/m/0f8l9c
/m/01r93l	/people/person/spouse_s./people/marriage/type_of_union	/m/04ztj
/m/09f6b	/olympics/olympic_sport/athletes./olympics/olympic_athlete_affiliation/country	/m/05qhw
/m/03j70t	/soccer/football_team/current_roster./soccer/football_roster_position/position	/m/0dgrmp
/m/0154qm	/film/actor/film./film/performance/film	/m/049xgc
/m/01svq8	/people/person/profession	/m/0dxtg
/m/0343h	/film/director/film	/m/0dfw0
/m/05dbyt	/film/actor/film./film/performance/film	/m/025ts_z
/m/0f4_l	/film/film/other_crew./film/film_crew_gig/film_crew_role	/m/01pvkk
/m/0210hf	/base/popstra/celebrity/friendship./base/popstra/friendship/participant	/m/016kkx
/m/084302	/film/film/genre	/m/02n4kr
/m/0241y7	/film/film/production_companies	/m/04rcl7
/m/0mkg	/music/performance_role/regular_performances./music/group_membership/role	/m/014zz1
/m/01pcql	/film/actor/film./film/performance/film	/m/0g68zt
/m/05dmmc	/award/award_winning_work/awards_won./award/award_honor/award_winner	/m/04vzv4
/m/0jqj5	/film/film/language	/m/06b_j
/m/0jrtv	/location/location/adjoin_s./location/adjoining_relationship/adjoins	/m/0jxh9
/m/01p3ty	/film/film/country	/m/03rk0
/m/0m593	/people/person/gender	/m/05zppz
/m/01qbg5	/film/film/genre	/m/03bxz7
/m/09sb52	/award/award_category/winners./award/award_honor/award_winner	/m/06g2d1
/m/0g701n	/soccer/football_team/current_roster./soccer/football_roster_position/position	/m/0dgrmp
/m/06dn58	/award/award_nominee/award_nominations./award/award_nomination/nominated_for	/m/05p9_ql
/m/083chw	/award/award_winner/awards_won./award/award_honor/award_winner	/m/0cl0bk
/m/01b195	/film/film/other_crew./film/film_crew_gig/film_crew_role	/m/0ch6mp2
/m/028tv0	/music/performance_role/regular_performances./music/group_membership/role	/m/01hww_
/m/0315q3	/influence/influence_node/influenced_by	/m/0p_pd
/m/0645k5	/film/film/release_date_s./film/film_regional_release_date/film_release_region	/m/05b4w
/m/017jd9	/film/film/release_date_s./film/film_regional_release_date/film_release_region	/m/06qd3
/m/01bdxz	/soccer/football_team/current_roster./soccer/football_roster_position/position	/m/0dgrmp
/m/01vw26l	/base/schemastaging/person_extra/net_worth./measurement_unit/dated_money_value/currency	/m/09nqf
/m/02d478	/film/film/language	/m/02h40lc
/m/01kckd	/soccer/football_team/current_roster./soccer/football_roster_position/position	/m/0dgrmp
/m/0pv2t	/film/film/written_by	/m/05jjl
/m/0d1t3	/olympics/olympic_sport/athletes./olympics/olympic_athlete_affiliation/country	/m/0chghy
/m/0l8bg	/film/film_subject/films	/m/02p86pb
/m/01vw26l	/film/actor/film./film/performance/film	/m/0bq8tmw
/m/040njc	/award/award_category/nominees./award/award_nomination/nominated_for	/m/05dmmc
/m/0fq7dv_	/film/film/country	/m/0chghy
/m/01wj18h	/award/award_winner/awards_won./award/award_honor/award_winner	/m/0cc5tgk
/m/09qvc0	/award/award_category/winners./award/award_honor/award_winner	/m/02bj6k
/m/02p76f9	/film/film/language	/m/02h40lc
/m/026v_78	/people/person/place_of_birth	/m/030qb3t
/m/01lnyf	/education/university/local_tuition./measurement_unit/dated_money_value/currency	/m/09nqf
/m/09pl3f	/people/person/profession	/m/0dxtg
/m/0cwx_	/location/location/time_zones	/m/02hcv8
/m/01h8rk	/organization/endowed_organization/endowment./measurement_unit/dated_money_value/currency	/m/09nqf
/m/02sgy	/music/performance_role/track_performances./music/track_contribution/role	/m/0l14qv
/m/0c5dd	/film/film/genre	/m/06qm3
/m/046fz5	/soccer/football_team/current_roster./soccer/football_roster_position/position	/m/0dgrmp
/m/0hz35	/location/location/time_zones	/m/02hcv8
/m/02h4rq6	/education/educational_degree/people_with_this_degree./education/education/major_field_of_study	/m/02lp1
/m/054krc	/award/award_category/nominees./award/award_nomination/nominated_for	/m/0k4fz
/m/07hwkr	/people/ethnicity/languages_spoken	/m/01wgr
/m/02flpc	/award/award_category/winners./award/award_honor/ceremony	/m/09n4nb
/m/05h43ls	/film/film/produced_by	/m/02lf0c
/m/0crx5w	/award/award_winner/awards_won./award/award_honor/award_winner	/m/02bvt
/m/017gl1	/award/award_winning_work/awards_won./award/award_honor/award_winner	/m/09wj5
/m/0kpys	/location/location/contains	/m/0281rp
/m/03s6l2	/film/film/featured_film_locations	/m/0b90_r
/m/01txts	/music/record_label/artist	/m/0qf3p
/m/03cglm	/award/award_nominee/award_nominations./award/award_nomination/award_nominee	/m/06qgvf
/m/06bd5j	/film/film/other_crew./film/film_crew_gig/film_crew_role	/m/0ch6mp2
/m/0g9wdmc	/film/film/release_date_s./film/film_regional_release_date/film_release_region	/m/0b90_r
/m/0yxl	/people/person/profession	/m/0dxtg
/m/07jnt	/film/film/release_date_s./film/film_regional_release_date/film_release_region	/m/0f8l9c
/m/03205_	/education/university/domestic_tuition./measurement_unit/dated_money_value/currency	/m/09nqf
/m/0154qm	/award/award_nominee/award_nominations./award/award_nomination/award_nominee	/m/02bfmn
/m/06182p	/education/educational_institution/students_graduates./education/education/student	/m/0bw87
/m/01kvrz	/education/university/local_tuition./measurement_unit/dated_money_value/currency	/m/09nqf
/m/0m313	/film/film/language	/m/02h40lc
/m/0738b8	/people/person/place_of_birth	/m/013yq
/m/03rwz3	/film/film_distributor/films_distributed./film/film_film_distributor_relationship/film	/m/06bd5j
/m/03_wpf	/award/award_winner/awards_won./award/award_honor/award_winner	/m/044mvs
/m/0k9j_	/film/actor/film./film/performance/film	/m/0k419
/m/01wdcxk	/people/person/profession	/m/039v1
/m/0djb3vw	/film/film/produced_by	/m/0g2lq
/m/02vtnf	/film/director/film	/m/0gcrg
/m/06szd3	/award/hall_of_fame/inductees./award/hall_of_fame_induction/inductee	/m/03f1r6t
/m/0jtg0	/music/performance_role/regular_performances./music/group_membership/role	/m/01hww_
/m/014mlp	/education/educational_degree/people_with_this_degree./education/education/institution	/m/01dbns
/m/06dv3	/award/award_nominee/award_nominations./award/award_nomination/award_nominee	/m/025h4z
/m/0g0z58	/american_football/football_team/current_roster./sports/sports_team_roster/position	/m/04nfpk
/m/01vsksr	/music/artist/track_contributions./music/track_contribution/role	/m/0xzly
/m/0276jmv	/people/person/spouse_s./people/marriage/type_of_union	/m/04ztj
/m/08n__5	/people/person/gender	/m/05zppz
/m/05b4w	/olympics/olympic_participating_country/athletes./olympics/olympic_athlete_affiliation/olympics	/m/0sxrz
/m/02x02kb	/people/person/nationality	/m/03rk0
/m/0bl06	/film/film/genre	/m/07s9rl0
/m/03m3nzf	/award/award_winner/awards_won./award/award_honor/award_winner	/m/03j367r
/m/09qvms	/award/award_ceremony/awards_presented./award/award_honor/award_winner	/m/06g2d1
/m/011_6p	/music/performance_role/regular_performances./music/group_membership/role	/m/0g33q
/m/03_l8m	/award/award_nominee/award_nominations./award/award_nomination/award_nominee	/m/0382m4
/m/03gvt	/music/performance_role/guest_performances./music/recording_contribution/performance_role	/m/0gkd1
/m/0g68zt	/film/film/language	/m/02h40lc
/m/02x0fs9	/film/film/language	/m/02h40lc
/m/06m_5	/location/location/adjoin_s./location/adjoining_relationship/adjoins	/m/03rk0
/m/01385g	/film/actor/film./film/performance/film	/m/026zlh9
/m/0hmr4	/award/award_winning_work/awards_won./award/award_honor/award	/m/02qyntr
/m/0330r	/award/award_winning_work/awards_won./award/award_honor/award_winner	/m/0d4fqn
/m/027_sn	/people/person/spouse_s./people/marriage/type_of_union	/m/04ztj
/m/024dgj	/base/schemastaging/person_extra/net_worth./measurement_unit/dated_money_value/currency	/m/09nqf
/m/0crs0b8	/film/film/country	/m/0f8l9c
/m/06chf	/tv/tv_producer/programs_produced./tv/tv_producer_term/program	/m/0l76z
/m/01kgv4	/base/popstra/celebrity/friendship./base/popstra/friendship/participant	/m/02fybl
/m/01rr_d	/education/educational_degree/people_with_this_degree./education/education/institution	/m/013719
/m/06t2t	/base/popstra/location/vacationers./base/popstra/vacation_choice/vacationer	/m/02lnhv
/m/03j63k	/tv/tv_program/languages	/m/02h40lc
/m/07brj	/music/performance_role/track_performances./music/track_contribution/role	/m/04q7r
/m/09pjnd	/people/person/place_of_birth	/m/0ynfz
/m/02g5h5	/award/award_nominee/award_nominations./award/award_nomination/award	/m/0cqhk0
/m/09lhln	/soccer/football_player/current_team./sports/sports_team_roster/team	/m/02b0zt
/m/0661m4p	/film/film/release_date_s./film/film_regional_release_date/film_release_region	/m/015fr
/m/03qlv7	/music/performance_role/regular_performances./music/group_membership/role	/m/023r2x
/m/0gx_p	/people/person/spouse_s./people/marriage/location_of_ceremony	/m/06_kh
/m/018w8	/olympics/olympic_sport/athletes./olympics/olympic_athlete_affiliation/country	/m/0d05w3
/m/0cq806	/award/award_winning_work/awards_won./award/award_honor/award	/m/040njc
/m/0283xx2	/film/film_distributor/films_distributed./film/film_film_distributor_relationship/film	/m/0q9b0
/m/03q45x	/film/actor/dubbing_performances./film/dubbing_performance/language	/m/02h40lc
/m/0gz6b6g	/film/film/language	/m/02h40lc
/m/06z6r	/olympics/olympic_sport/athletes./olympics/olympic_athlete_affiliation/country	/m/05qhw
/m/033qdy	/film/film/estimated_budget./measurement_unit/dated_money_value/currency	/m/09nqf
/m/014mlp	/education/educational_degree/people_with_this_degree./education/education/institution	/m/02lv2v
/m/0bxqq	/location/statistical_region/rent50_2./measurement_unit/dated_money_value/currency	/m/09nqf
/m/0443xn	/people/person/spouse_s./people/marriage/type_of_union	/m/04ztj
/m/02rghbp	/award/award_winner/awards_won./award/award_honor/award_winner	/m/0275_pj
/m/0b05xm	/award/award_nominee/award_nominations./award/award_nomination/award_nominee	/m/02q5xsx
/m/024rwx	/tv/tv_program/program_creator	/m/05vtbl
/m/060j8b	/award/award_winner/awards_won./award/award_honor/award_winner	/m/083chw
/m/01q_ph	/people/person/profession	/m/0dxtg
/m/012rrr	/location/administrative_division/first_level_division_of	/m/0h7x
/m/0sxmx	/film/film/estimated_budget./measurement_unit/dated_money_value/currency	/m/09nqf
/m/048scx	/film/film/other_crew./film/film_crew_gig/film_crew_role	/m/01pvkk
/m/01fdc0	/people/person/sibling_s./people/sibling_relationship/sibling	/m/0h32q
/m/01bgqh	/award/award_category/winners./award/award_honor/ceremony	/m/0gx1673
/m/01kwsg	/people/person/spouse_s./people/marriage/type_of_union	/m/04ztj
/m/017z49	/film/film/featured_film_locations	/m/0k_q_
/m/02qyntr	/award/award_category/nominees./award/award_nomination/nominated_for	/m/0jyx6
/m/01gsrl	/government/legislative_session/members./government/government_position_held/legislative_sessions	/m/01gst_
/m/05xpv	/people/deceased_person/place_of_death	/m/0k049
/m/09r1j5	/people/person/gender	/m/05zppz
/m/0gvx_	/award/award_category/winners./award/award_honor/ceremony	/m/0fzrtf
/m/04wg38	/people/person/profession	/m/0dxtg
/m/0147dk	/award/award_nominee/award_nominations./award/award_nomination/award	/m/02f5qb
/m/07tp2	/location/country/official_language	/m/02h40lc
/m/035d1m	/olympics/olympic_sport/athletes./olympics/olympic_athlete_affiliation/country	/m/0jgd
/m/016lh0	/people/person/gender	/m/05zppz
/m/02wtp6	/film/film/release_date_s./film/film_regional_release_date/film_release_region	/m/07ylj
/m/0401sg	/film/film/release_date_s./film/film_regional_release_date/film_release_region	/m/0b90_r
/m/07s9rl0	/media_common/netflix_genre/titles	/m/019vhk
/m/01q_ph	/base/popstra/celebrity/friendship./base/popstra/friendship/participant	/m/0mdqp
/m/07y8l9	/film/actor/film./film/performance/film	/m/048tv9
/m/0gkz15s	/film/film/release_date_s./film/film_regional_release_date/film_release_region	/m/06qd3
/m/0fqt1ns	/film/film/film_format	/m/017fx5
/m/0bs5k8r	/film/film/other_crew./film/film_crew_gig/film_crew_role	/m/089fss
/m/0169dl	/people/person/places_lived./people/place_lived/location	/m/01qh7
/m/0f8l9c	/military/military_combatant/military_conflicts./military/military_combatant_group/combatants	/m/0chghy
/m/06c1y	/location/location/partially_contains	/m/026zt
/m/04ztj	/people/marriage_union_type/unions_of_this_type./people/marriage/location_of_ceremony	/m/0f2r6
/m/03mp37	/soccer/football_team/current_roster./soccer/football_roster_position/position	/m/0dgrmp
/m/02ptczs	/film/film/estimated_budget./measurement_unit/dated_money_value/currency	/m/09nqf
/m/054ky1	/award/award_category/winners./award/award_honor/award_winner	/m/012vby
/m/0738b8	/influence/influence_node/influenced_by	/m/01wp_jm
/m/01sgl	/olympics/olympic_sport/athletes./olympics/olympic_athlete_affiliation/olympics	/m/06sks6
/m/01fdc0	/film/actor/film./film/performance/film	/m/0170xl
/m/04yywz	/film/actor/film./film/performance/film	/m/0140g4
/m/07s9rl0	/media_common/netflix_genre/titles	/m/047bynf
/m/03_l8m	/award/award_winner/awards_won./award/award_honor/award_winner	/m/083chw
/m/01352_	/base/x2010fifaworldcupsouthafrica/world_cup_squad/current_world_cup_squad./base/x2010fifaworldcupsouthafrica/current_world_cup_squad/current_club	/m/02rh_0
/m/02ck7w	/people/person/religion	/m/0c8wxp
/m/017l4	/people/person/profession	/m/01c72t
/m/01nhkxp	/music/artist/track_contributions./music/track_contribution/role	/m/0gkd1
/m/04rqd	/broadcast/content/artist	/m/07hgm
/m/0641g8	/people/person/profession	/m/01c72t
/m/06z6r	/olympics/olympic_sport/athletes./olympics/olympic_athlete_affiliation/country	/m/0166v
/m/04bdxl	/award/award_nominee/award_nominations./award/award_nomination/award_nominee	/m/05k2s_
/m/0bgrsl	/people/person/profession	/m/0dxtg
/m/0hz35	/location/statistical_region/rent50_2./measurement_unit/dated_money_value/currency	/m/09nqf
/m/0lbbj	/user/jg/default_domain/olympic_games/sports	/m/0d1t3
/m/01w1kyf	/people/person/profession	/m/0dxtg
/m/01ztgm	/base/popstra/celebrity/breakup./base/popstra/breakup/participant	/m/01vs_v8
/m/0g33q	/music/performance_role/regular_performances./music/group_membership/role	/m/0jtg0
/m/0227tr	/award/award_nominee/award_nominations./award/award_nomination/award_nominee	/m/06t74h
/m/02rghbp	/people/person/profession	/m/0dxtg
/m/037n97	/music/genre/artists	/m/0135xb
/m/0gs96	/award/award_category/winners./award/award_honor/ceremony	/m/05q7cj
/m/0l786	/people/person/gender	/m/05zppz
/m/08hsww	/award/award_winner/awards_won./award/award_honor/award_winner	/m/0cj36c
/m/0f8l9c	/olympics/olympic_participating_country/medals_won./olympics/olympic_medal_honor/olympics	/m/0lbd9
/m/0401sg	/film/film/estimated_budget./measurement_unit/dated_money_value/currency	/m/09nqf
/m/0gqz2	/award/award_category/winners./award/award_honor/ceremony	/m/0bzmt8
/m/012w70	/language/human_language/countries_spoken_in	/m/04thp
/m/0dq3c	/business/job_title/people_with_this_title./business/employment_tenure/company	/m/02rfft
/m/07swvb	/award/award_nominee/award_nominations./award/award_nomination/award	/m/05p09zm
/m/05gpy	/influence/influence_node/peers./influence/peer_relationship/peers	/m/06jkm
/m/026zvx7	/award/award_nominee/award_nominations./award/award_nomination/award_nominee	/m/03zqc1
/m/0b7l4x	/film/film/other_crew./film/film_crew_gig/film_crew_role	/m/0ch6mp2
/m/09n5b9	/government/government_office_category/officeholders./government/government_position_held/jurisdiction_of_office	/m/059_c
/m/031vy_	/education/educational_institution/students_graduates./education/education/student	/m/071xj
/m/01zhs3	/soccer/football_team/current_roster./sports/sports_team_roster/position	/m/0dgrmp
/m/0d1t3	/olympics/olympic_sport/athletes./olympics/olympic_athlete_affiliation/olympics	/m/06sks6
/m/01hb6v	/influence/influence_node/influenced_by	/m/07cbs
/m/04cw0j	/award/award_nominee/award_nominations./award/award_nomination/award_nominee	/m/0b7xl8
/m/013b2h	/award/award_ceremony/awards_presented./award/award_honor/award_winner	/m/014z8v
/m/0bfvd4	/award/award_category/winners./award/award_honor/award_winner	/m/0ywqc
/m/04dn09n	/award/award_category/nominees./award/award_nomination/nominated_for	/m/017z49
/m/01pcdn	/people/person/places_lived./people/place_lived/location	/m/030qb3t
/m/0686zv	/people/person/gender	/m/05zppz
/m/0dq626	/film/film/genre	/m/07s9rl0
/m/016kkx	/people/person/employment_history./business/employment_tenure/company	/m/07wh1
/m/03m3nzf	/people/person/spouse_s./people/marriage/type_of_union	/m/04ztj
/m/027xx3	/education/university/domestic_tuition./measurement_unit/dated_money_value/currency	/m/09nqf
/m/037jz	/people/person/religion	/m/0c8wxp
/m/01wj18h	/award/award_nominee/award_nominations./award/award_nomination/award	/m/02f5qb
/m/02nf2c	/tv/tv_program/genre	/m/0c4xc
/m/03v3xp	/film/actor/film./film/performance/film	/m/0fh2v5
/m/06pj8	/award/award_nominee/award_nominations./award/award_nomination/nominated_for	/m/0gy0l_
/m/02w_6xj	/award/award_category/winners./award/award_honor/award_winner	/m/0184jw
/m/047d21r	/film/film/estimated_budget./measurement_unit/dated_money_value/currency	/m/09nqf
/m/0m123	/tv/tv_program/languages	/m/02h40lc
/m/0140t7	/music/artist/track_contributions./music/track_contribution/role	/m/0l14md
/m/0bq8tmw	/film/film/release_date_s./film/film_regional_release_date/film_release_region	/m/01crd5
/m/05hjnw	/film/film/genre	/m/0hn10
/m/08c6k9	/film/film/genre	/m/07s9rl0
/m/055c8	/people/person/gender	/m/05zppz
/m/0gj9qxr	/film/film/other_crew./film/film_crew_gig/film_crew_role	/m/09vw2b7
/m/01kt17	/award/award_nominee/award_nominations./award/award_nomination/award	/m/0bs0bh
/m/017gl1	/film/film/language	/m/02h40lc
/m/012mzw	/organization/non_profit_organization/registered_with./organization/non_profit_registration/registering_agency	/m/03z19
/m/06rf7	/location/location/contains	/m/0g7pm
/m/0g2c8	/award/hall_of_fame/inductees./award/hall_of_fame_induction/inductee	/m/01wg25j
/m/0cp0ph6	/film/film/written_by	/m/0cj2k3
/m/02y_lrp	/film/film/produced_by	/m/04q5zw
/m/02_nsc	/film/film/estimated_budget./measurement_unit/dated_money_value/currency	/m/09nqf
/m/017jd9	/film/film/release_date_s./film/film_regional_release_date/film_release_region	/m/0chghy
/m/014gf8	/people/person/gender	/m/05zppz
/m/0l14md	/music/performance_role/regular_performances./music/group_membership/group	/m/0bsj9
/m/09ykwk	/film/actor/dubbing_performances./film/dubbing_performance/language	/m/02h40lc
/m/0mdqp	/award/award_nominee/award_nominations./award/award_nomination/nominated_for	/m/04gv3db
/m/0pd64	/award/award_winning_work/awards_won./award/award_honor/award	/m/04kxsb
/m/0fh2v5	/film/film/genre	/m/02n4kr
/m/072hx4	/film/film/release_date_s./film/film_regional_release_date/film_release_region	/m/06qd3
/m/044gyq	/award/award_winner/awards_won./award/award_honor/award_winner	/m/03d2k
/m/01n6r0	/education/educational_institution/colors	/m/038hg
/m/0bdjd	/award/award_winning_work/awards_won./award/award_honor/award	/m/0gr4k
/m/04xfb	/people/person/gender	/m/05zppz
/m/0x67	/people/ethnicity/people	/m/0807ml
/m/05b4w	/military/military_combatant/military_conflicts./military/military_combatant_group/combatants	/m/087vz
/m/06nvzg	/business/business_operation/revenue./measurement_unit/dated_money_value/currency	/m/09nqf
/m/03h_0_z	/base/popstra/celebrity/friendship./base/popstra/friendship/participant	/m/018n6m
/m/027m5wv	/film/film/other_crew./film/film_crew_gig/film_crew_role	/m/0215hd
/m/0gk4g	/people/cause_of_death/people	/m/01hkg9
/m/016722	/base/biblioness/bibs_location/country	/m/03rk0
/m/01tspc6	/film/actor/film./film/performance/film	/m/0m313
/m/014z8v	/people/person/spouse_s./people/marriage/type_of_union	/m/04ztj
/m/016jll	/people/person/spouse_s./people/marriage/type_of_union	/m/04ztj
/m/08hhm6	/people/person/spouse_s./people/marriage/type_of_union	/m/04ztj
/m/02knxx	/people/cause_of_death/people	/m/06vqdf
/m/04ktcgn	/award/award_nominee/award_nominations./award/award_nomination/nominated_for	/m/05qbckf
/m/0gv2r	/people/person/gender	/m/05zppz
/m/06bzwt	/award/award_nominee/award_nominations./award/award_nomination/award	/m/02x8n1n
/m/082brv	/people/person/spouse_s./people/marriage/type_of_union	/m/04ztj
/m/07s9rl0	/media_common/netflix_genre/titles	/m/0qmfz
/m/014mlp	/education/educational_degree/people_with_this_degree./education/education/institution	/m/021996
/m/0gqz2	/award/award_category/winners./award/award_honor/ceremony	/m/05hmp6
/m/0g7pm	/base/aareas/schema/administrative_area/administrative_parent	/m/06rf7
/m/01dw4q	/award/award_winner/awards_won./award/award_honor/award_winner	/m/05lb65
/m/01wzs_q	/people/person/profession	/m/0np9r
/m/07tw_b	/film/film/language	/m/02h40lc
/m/033pf1	/film/film/estimated_budget./measurement_unit/dated_money_value/currency	/m/09nqf
/m/08y7b9	/people/person/nationality	/m/03rk0
/m/07r4c	/people/person/places_lived./people/place_lived/location	/m/030qb3t
/m/0ccck7	/award/award_winning_work/awards_won./award/award_honor/award	/m/0gr4k
/m/0408np	/base/popstra/celebrity/canoodled./base/popstra/canoodled/participant	/m/02lnhv
/m/0dgrmp	/sports/sports_position/players./sports/sports_team_roster/team	/m/0196bp
/m/026mmy	/award/award_category/winners./award/award_honor/ceremony	/m/013b2h
/m/06x77g	/film/film/genre	/m/02l7c8
/m/01r93l	/film/actor/film./film/performance/film	/m/05_5rjx
/m/02wszf	/sports/sports_position/players./sports/sports_team_roster/team	/m/02gtm4
/m/021mlp	/people/person/gender	/m/05zppz
/m/0djb3vw	/film/film/produced_by	/m/04wvhz
/m/02c8d7	/music/genre/artists	/m/01wbl_r
/m/01lk0l	/award/award_category/winners./award/award_honor/award_winner	/m/0b7xl8
/m/03cglm	/award/award_nominee/award_nominations./award/award_nomination/award_nominee	/m/014v6f
/m/0fy2s1	/people/person/spouse_s./people/marriage/type_of_union	/m/04ztj
/m/01p4vl	/award/award_nominee/award_nominations./award/award_nomination/award_nominee	/m/01d1st
/m/05rrtf	/organization/organization/headquarters./location/mailing_address/state_province_region	/m/01n7q
/m/0bs8d	/award/award_nominee/award_nominations./award/award_nomination/award	/m/0bm7fy
/m/06182p	/education/educational_institution/students_graduates./education/education/student	/m/01v5h
/m/03h304l	/organization/organization_founder/organizations_founded	/m/05rrtf
/m/01x0sy	/people/person/place_of_birth	/m/0r4h3
/m/0bxs_d	/award/award_ceremony/awards_presented./award/award_honor/award_winner	/m/04wp2p
/m/02d02	/sports/professional_sports_team/draft_picks./sports/sports_league_draft_pick/school	/m/01jq4b
/m/023g6w	/film/film/country	/m/05b4w
/m/01vswx5	/people/person/spouse_s./people/marriage/type_of_union	/m/04ztj
/m/06x77g	/film/film/language	/m/064_8sq
/m/0dgrmp	/sports/sports_position/players./sports/sports_team_roster/team	/m/01cw24
/m/05d1dy	/people/person/profession	/m/0dxtg
/m/08hhm6	/people/person/gender	/m/05zppz
/m/017g2y	/people/person/gender	/m/05zppz
/m/02t__l	/people/person/place_of_birth	/m/01sn3
/m/0170xl	/award/award_winning_work/awards_won./award/award_honor/award_winner	/m/01fdc0
/m/015npr	/people/person/religion	/m/0flw86
/m/0cq7tx	/award/award_nominated_work/award_nominations./award/award_nomination/nominated_for	/m/0bcndz
/m/08hsww	/award/award_nominee/award_nominations./award/award_nomination/award_nominee	/m/0cj2k3
/m/09qvc0	/award/award_category/winners./award/award_honor/award_winner	/m/027l0b
/m/08rr3p	/film/film/genre	/m/07s9rl0
/m/05c4fys	/soccer/football_player/current_team./sports/sports_team_roster/team	/m/01kckd
/m/032d52	/organization/endowed_organization/endowment./measurement_unit/dated_money_value/currency	/m/09nqf
/m/01svw8n	/people/person/profession	/m/016z4k
/m/01b9ck	/award/award_nominee/award_nominations./award/award_nomination/nominated_for	/m/04v89z
/m/01mkn_d	/people/person/gender	/m/05zppz
/m/03rk0	/location/location/contains	/m/0cvw9
/m/03jxw	/people/person/gender	/m/05zppz
/m/0161h5	/film/actor/dubbing_performances./film/dubbing_performance/language	/m/02h40lc
/m/0m3gy	/film/film/genre	/m/01585b
/m/03j76b	/soccer/football_team/current_roster./soccer/football_roster_position/position	/m/0dgrmp
/m/02sdwt	/education/educational_institution/students_graduates./education/education/student	/m/01vrlqd
/m/08hp53	/people/person/profession	/m/012t_z
/m/01rzqj	/film/actor/film./film/performance/film	/m/0fpkhkz
/m/01ry_x	/film/film/written_by	/m/02fgp0
/m/06q07	/organization/organization/headquarters./location/mailing_address/citytown	/m/07dfk
/m/09sb52	/award/award_category/winners./award/award_honor/award_winner	/m/01tspc6
/m/049w1q	/film/film/release_date_s./film/film_regional_release_date/film_release_region	/m/05qhw
/m/0bynt	/olympics/olympic_sport/athletes./olympics/olympic_athlete_affiliation/country	/m/01rxw
/m/0319l	/music/instrument/instrumentalists	/m/04mky3
/m/05d1dy	/film/actor/film./film/performance/film	/m/01ffx4
/m/07yvsn	/award/award_winning_work/awards_won./award/award_honor/award	/m/0gs96
/m/051z6rz	/people/person/profession	/m/0n1h
/m/09v6gc9	/people/person/gender	/m/05zppz
/m/01k3qj	/people/person/profession	/m/01c72t
/m/01ffx4	/film/film/release_date_s./film/film_regional_release_date/film_release_region	/m/07f1x
/m/03dctt	/people/person/gender	/m/05zppz
/m/04wvhz	/award/award_nominee/award_nominations./award/award_nomination/award_nominee	/m/0g2lq
/m/01c92g	/award/award_category/winners./award/award_honor/ceremony	/m/09n4nb
/m/0ggbhy7	/film/film/language	/m/06b_j
/m/0c422z4	/award/award_category/nominees./award/award_nomination/nominated_for	/m/02825kb
/m/0p_pd	/base/schemastaging/person_extra/net_worth./measurement_unit/dated_money_value/currency	/m/09nqf
/m/01x209s	/award/award_nominee/award_nominations./award/award_nomination/award	/m/09qj50
/m/09z1lg	/award/award_nominee/award_nominations./award/award_nomination/award	/m/03m79j_
/m/0bzm__	/award/award_ceremony/awards_presented./award/award_honor/award_winner	/m/01l9v7n
/m/04kxsb	/award/award_category/nominees./award/award_nomination/nominated_for	/m/06cm5
/m/03xq0f	/film/film_distributor/films_distributed./film/film_film_distributor_relationship/film	/m/05c9zr
/m/042f1	/people/person/profession	/m/0g0vx
/m/0by17xn	/film/film/other_crew./film/film_crew_gig/film_crew_role	/m/0ch6mp2
/m/0287477	/film/film/other_crew./film/film_crew_gig/film_crew_role	/m/0ch6mp2
/m/015c2f	/base/popstra/celebrity/friendship./base/popstra/friendship/participant	/m/01pcdn
/m/03q43g	/film/actor/film./film/performance/film	/m/084qpk
/m/02vnp2	/education/educational_institution/colors	/m/019sc
/m/03xq0f	/film/film_distributor/films_distributed./film/film_film_distributor_relationship/film	/m/0f4_l
/m/08n__5	/people/person/spouse_s./people/marriage/type_of_union	/m/04ztj
/m/0bcndz	/film/film/genre	/m/07s9rl0
/m/03rhqg	/music/record_label/artist	/m/02whj
/m/0154qm	/award/award_nominee/award_nominations./award/award_nomination/award_nominee	/m/01v9l67
/m/0crqcc	/people/person/gender	/m/05zppz
/m/0169dl	/people/person/languages	/m/02h40lc
/m/02704ff	/film/film/genre	/m/0vgkd
/m/072bb1	/award/award_winner/awards_won./award/award_honor/award_winner	/m/0cl0bk
/m/0gtxj2q	/film/film/release_date_s./film/film_regional_release_date/film_release_region	/m/015fr
/m/01wd02c	/people/person/religion	/m/01lp8
/m/0b455l	/people/person/gender	/m/05zppz
/m/0bkj86	/education/educational_degree/people_with_this_degree./education/education/institution	/m/01stzp
/m/0cqhk0	/award/award_category/winners./award/award_honor/award_winner	/m/083chw
/m/01q_ph	/film/actor/film./film/performance/film	/m/08s6mr
/m/02s6sh	/music/artist/track_contributions./music/track_contribution/role	/m/0l14md
/m/02y_lrp	/film/film/other_crew./film/film_crew_gig/film_crew_role	/m/0ch6mp2
/m/0sxns	/film/film/estimated_budget./measurement_unit/dated_money_value/currency	/m/09nqf
/m/02607j	/education/university/local_tuition./measurement_unit/dated_money_value/currency	/m/09nqf
/m/03c0t9	/soccer/football_team/current_roster./sports/sports_team_roster/position	/m/0dgrmp
/m/06b_0	/award/award_nominee/award_nominations./award/award_nomination/award	/m/0gr4k
/m/04xg2f	/film/film/genre	/m/0hn10
/m/0m593	/award/award_nominee/award_nominations./award/award_nomination/award	/m/054ky1
/m/01n6r0	/education/educational_institution/students_graduates./education/education/student	/m/096lf_
/m/01xlqd	/film/film/distributors./film/film_film_distributor_relationship/film_distribution_medium	/m/0dq6p
/m/04rwx	/organization/organization/headquarters./location/mailing_address/citytown	/m/01qh7
/m/059x66	/award/award_ceremony/awards_presented./award/award_honor/award_winner	/m/0hsn_
/m/09tkzy	/film/film/genre	/m/07s9rl0
/m/02x258x	/award/award_category/nominees./award/award_nomination/nominated_for	/m/01y9r2
/m/02cllz	/film/actor/film./film/performance/film	/m/03bx2lk
/m/0gr4k	/award/award_category/nominees./award/award_nomination/nominated_for	/m/0kb07
/m/019pkm	/people/person/gender	/m/05zppz
/m/04t36	/media_common/netflix_genre/titles	/m/011yxg
/m/05g49	/sports/professional_sports_team/draft_picks./sports/sports_league_draft_pick/draft	/m/09l0x9
/m/074m2	/medicine/disease/risk_factors	/m/05zppz
/m/086sj	/award/award_nominee/award_nominations./award/award_nomination/award_nominee	/m/019f2f
/m/046b0s	/award/award_nominee/award_nominations./award/award_nomination/award_nominee	/m/070j61
/m/02qjj7	/people/person/profession	/m/0dxtg
/m/011yhm	/film/film/estimated_budget./measurement_unit/dated_money_value/currency	/m/09nqf
/m/0330r	/tv/tv_program/regular_cast./tv/regular_tv_appearance/actor	/m/04cl1
/m/0rt80	/location/location/time_zones	/m/02hcv8
/m/047fjjr	/film/film/other_crew./film/film_crew_gig/film_crew_role	/m/089fss
/m/014mlp	/education/educational_degree/people_with_this_degree./education/education/major_field_of_study	/m/0g26h
/m/0l14qv	/music/instrument/instrumentalists	/m/017l4
/m/03wh49y	/tv/tv_program/regular_cast./tv/regular_tv_appearance/actor	/m/0f0kz
/m/0kr5_	/people/person/gender	/m/05zppz
/m/0dyb1	/film/film/release_date_s./film/film_regional_release_date/film_release_region	/m/0chghy
/m/03k7bd	/people/person/place_of_birth	/m/01sn3
/m/0_b9f	/film/film/country	/m/0chghy
/m/0gqz2	/award/award_category/winners./award/award_honor/ceremony	/m/050yyb
/m/014mlp	/education/educational_degree/people_with_this_degree./education/education/institution	/m/01h8rk
/m/01yl6n	/location/administrative_division/first_level_division_of	/m/05qhw
/m/0661m4p	/film/film/release_date_s./film/film_regional_release_date/film_release_region	/m/047yc
/m/05lb87	/people/person/gender	/m/05zppz
/m/01gstn	/government/legislative_session/members./government/government_position_held/district_represented	/m/05k7sb
/m/01rzqj	/film/actor/film./film/performance/film	/m/051zy_b
/m/0713r	/sports/sports_team/sport	/m/018jz
/m/01xlqd	/film/film/estimated_budget./measurement_unit/dated_money_value/currency	/m/09nqf
/m/014mlp	/education/educational_degree/people_with_this_degree./education/education/student	/m/01wyzyl
/m/059g4	/base/locations/continents/countries_within	/m/0b90_r
/m/09n5b9	/government/government_office_category/officeholders./government/government_position_held/jurisdiction_of_office	/m/04rrx
/m/015t56	/award/award_nominee/award_nominations./award/award_nomination/award_nominee	/m/0f0kz
/m/023l9y	/music/artist/track_contributions./music/track_contribution/role	/m/01qbl
/m/0dgrmp	/sports/sports_position/players./sports/sports_team_roster/team	/m/057pq5
/m/0ndsl1x	/film/film/other_crew./film/film_crew_gig/crewmember	/m/095zvfg
/m/02q_x_l	/tv/tv_program/languages	/m/02h40lc
/m/017gl1	/award/award_winning_work/awards_won./award/award_honor/award_winner	/m/04ktcgn
/m/0ylvj	/education/educational_institution/students_graduates./education/education/student	/m/041h0
/m/07s9rl0	/media_common/netflix_genre/titles	/m/0gy0l_
/m/054krc	/award/award_category/nominees./award/award_nomination/nominated_for	/m/08nvyr
/m/02633g	/people/person/places_lived./people/place_lived/location	/m/02cl1
/m/03ntbmw	/film/film/other_crew./film/film_crew_gig/film_crew_role	/m/04pyp5
/m/06szd3	/award/hall_of_fame/inductees./award/hall_of_fame_induction/inductee	/m/016kkx
/m/05p09zm	/award/award_category/nominees./award/award_nomination/nominated_for	/m/0pc62
/m/04vn5	/sports/professional_sports_team/draft_picks./sports/sports_league_draft_pick/draft	/m/02qw1zx
/m/0lbl6	/base/aareas/schema/administrative_area/administrative_parent	/m/0d05w3
/m/017z49	/film/film/release_date_s./film/film_regional_release_date/film_release_region	/m/0h7x
/m/032_wv	/film/film/genre	/m/06nbt
/m/03818y	/education/educational_institution/colors	/m/036k5h
/m/0fpj9pm	/people/person/spouse_s./people/marriage/type_of_union	/m/04ztj
/m/02wgbb	/film/film/genre	/m/05p553
/m/0fq7dv_	/film/film/release_date_s./film/film_regional_release_date/film_release_region	/m/0154j
/m/01pcdn	/base/popstra/celebrity/friendship./base/popstra/friendship/participant	/m/015c2f
/m/0879bpq	/film/film/release_date_s./film/film_regional_release_date/film_release_region	/m/06qd3
/m/015bpl	/film/film/language	/m/02h40lc
/m/02d003	/film/film/other_crew./film/film_crew_gig/film_crew_role	/m/01pvkk
/m/07s9rl0	/media_common/netflix_genre/titles	/m/03ntbmw
/m/01z7_f	/people/person/spouse_s./people/marriage/type_of_union	/m/04ztj
/m/015dqj	/film/actor/film./film/performance/film	/m/02q8ms8
/m/02h3tp	/people/person/spouse_s./people/marriage/type_of_union	/m/04ztj
/m/0fj52s	/food/food/nutrients./food/nutrition_fact/nutrient	/m/02kcv4x
/m/01_vfy	/film/director/film	/m/0g68zt
/m/072hx4	/film/film/release_date_s./film/film_regional_release_date/film_release_region	/m/0jgd
/m/031n8c	/education/university/local_tuition./measurement_unit/dated_money_value/currency	/m/09nqf
/m/06cl2w	/people/person/profession	/m/0np9r
/m/01679d	/music/performance_role/track_performances./music/track_contribution/role	/m/07brj
/m/03qlv7	/music/performance_role/track_performances./music/track_contribution/role	/m/0979zs
/m/0k9j_	/award/award_nominee/award_nominations./award/award_nomination/award	/m/054ky1
/m/03xp8d5	/award/award_nominee/award_nominations./award/award_nomination/award	/m/0f_nbyh
/m/02wb6d	/people/person/gender	/m/05zppz
/m/01nms7	/award/award_nominee/award_nominations./award/award_nomination/award	/m/09sb52
/m/0x67	/people/ethnicity/people	/m/042xrr
/m/0gl3hr	/film/film/language	/m/02h40lc
/m/0828jw	/award/award_winning_work/awards_won./award/award_honor/award_winner	/m/044mvs
/m/01v0fn1	/award/award_nominee/award_nominations./award/award_nomination/award_nominee	/m/02_jkc
/m/0jdhp	/film/actor/film./film/performance/film	/m/011wtv
/m/0cj2w	/people/person/profession	/m/0dxtg
/m/02p65p	/award/award_nominee/award_nominations./award/award_nomination/award_nominee	/m/01qscs
/m/035gt8	/organization/endowed_organization/endowment./measurement_unit/dated_money_value/currency	/m/09nqf
/m/018fmr	/celebrities/celebrity/sexual_relationships./celebrities/romantic_relationship/celebrity	/m/02hy9p
/m/0dx97	/people/person/profession	/m/06q2q
/m/01xlqd	/film/film/release_date_s./film/film_regional_release_date/film_release_region	/m/0chghy
/m/01t8399	/people/person/spouse_s./people/marriage/type_of_union	/m/04ztj
/m/031vy_	/education/educational_institution/students_graduates./education/education/student	/m/03f22dp
/m/0gtvpkw	/film/film/release_date_s./film/film_regional_release_date/film_release_region	/m/04gzd
/m/0g9wdmc	/film/film/release_date_s./film/film_regional_release_date/film_release_region	/m/0f8l9c
/m/01vvyc_	/award/award_winner/awards_won./award/award_honor/award_winner	/m/01vvydl
/m/031zkw	/award/award_nominee/award_nominations./award/award_nomination/award	/m/08_vwq
/m/026zvx7	/award/award_nominee/award_nominations./award/award_nomination/award_nominee	/m/01dw4q
/m/0jqn5	/award/award_winning_work/awards_won./award/award_honor/award	/m/025m8y
/m/024rbz	/film/film_distributor/films_distributed./film/film_film_distributor_relationship/film	/m/07qg8v
/m/0bvfqq	/award/award_ceremony/awards_presented./award/award_honor/honored_for	/m/0drnwh
/m/07dnx	/influence/influence_node/influenced_by	/m/02lt8
/m/06zsk51	/film/film/language	/m/02h40lc
/m/0qmd5	/film/film/executive_produced_by	/m/052hl
/m/03j149k	/people/person/profession	/m/04j5jl
/m/0j8p6	/location/capital_of_administrative_division/capital_of./location/administrative_division_capital_relationship/administrative_division	/m/05j49
/m/02ptczs	/award/award_winning_work/awards_won./award/award_honor/award_winner	/m/06b_0
/m/0gxkm	/soccer/football_team/current_roster./sports/sports_team_roster/position	/m/0dgrmp
/m/0gk4g	/people/cause_of_death/people	/m/0h0p_
/m/03nnm4t	/award/award_ceremony/awards_presented./award/award_honor/honored_for	/m/03cv_gy
/m/07wbk	/government/political_party/politicians_in_this_party./government/political_party_tenure/politician	/m/07hyk
/m/01v0fn1	/award/award_nominee/award_nominations./award/award_nomination/award_nominee	/m/01pbxb
/m/025v26c	/sports/sports_team/roster./american_football/football_historical_roster_position/position_s	/m/05zm34
/m/012mzw	/education/educational_institution/students_graduates./education/education/major_field_of_study	/m/01tbp
/m/06cgy	/film/actor/film./film/performance/film	/m/0by17xn
/m/02hn5v	/award/award_ceremony/awards_presented./award/award_honor/award_winner	/m/06b_0
/m/023r2x	/music/performance_role/track_performances./music/track_contribution/role	/m/0l15f_
/m/0l2rj	/location/statistical_region/rent50_2./measurement_unit/dated_money_value/currency	/m/09nqf
/m/01738w	/film/film/other_crew./film/film_crew_gig/film_crew_role	/m/01pvkk
/m/01h72l	/tv/tv_program/regular_cast./tv/regular_tv_appearance/actor	/m/02wrhj
/m/09sb52	/award/award_category/nominees./award/award_nomination/nominated_for	/m/049xgc
/m/020_95	/award/award_nominee/award_nominations./award/award_nomination/award	/m/09qwmm
/m/04t36	/media_common/netflix_genre/titles	/m/0cq7tx
/m/026mfs	/award/award_category/winners./award/award_honor/ceremony	/m/01s695
/m/023jq1	/people/person/profession	/m/0dxtg
/m/02xbyr	/film/film/genre	/m/05p553
/m/02t_8z	/people/person/profession	/m/0dxtg
/m/01cmp9	/award/award_winning_work/awards_won./award/award_honor/award	/m/026mmy
/m/09blyk	/media_common/netflix_genre/titles	/m/049w1q
/m/0227tr	/film/actor/film./film/performance/film	/m/03t97y
/m/0807ml	/film/actor/film./film/performance/film	/m/03p2xc
/m/040njc	/award/award_category/nominees./award/award_nomination/nominated_for	/m/0cz_ym
/m/07tp2	/location/statistical_region/gni_per_capita_in_ppp_dollars./measurement_unit/dated_money_value/currency	/m/09nqf
/m/05zjtn4	/education/university/domestic_tuition./measurement_unit/dated_money_value/currency	/m/09nqf
/m/02h4rq6	/education/educational_degree/people_with_this_degree./education/education/institution	/m/01dzg0
/m/05qbckf	/film/film/release_date_s./film/film_regional_release_date/film_release_region	/m/06t2t
/m/01hmb_	/award/award_nominee/award_nominations./award/award_nomination/award	/m/0bp_b2
/m/01g7_r	/education/university/local_tuition./measurement_unit/dated_money_value/currency	/m/09nqf
/m/01vng3b	/music/group_member/membership./music/group_membership/role	/m/0l14md
/m/013rds	/music/artist/origin	/m/09b8m
/m/04nfpk	/sports/sports_position/players./sports/sports_team_roster/team	/m/03hfx6c
/m/02k4b2	/people/person/religion	/m/01lp8
/m/0133sq	/people/person/gender	/m/05zppz
/m/01dhmw	/influence/influence_node/influenced_by	/m/09dt7
/m/01j_9c	/education/educational_institution/colors	/m/019sc
/m/07jrjb	/people/person/spouse_s./people/marriage/type_of_union	/m/04ztj
/m/02sj1x	/award/award_nominee/award_nominations./award/award_nomination/award	/m/054krc
/m/01_x6v	/people/person/languages	/m/02h40lc
/m/09sdmz	/award/award_category/nominees./award/award_nomination/nominated_for	/m/04jm_hq
/m/0gs7x	/people/person/profession	/m/05z96
/m/02v1m7	/award/award_category/winners./award/award_honor/award_winner	/m/0c9l1
/m/027pfg	/film/film/other_crew./film/film_crew_gig/crewmember	/m/03m49ly
/m/0hvvf	/film/film/written_by	/m/0hw1j
/m/03m3nzf	/award/award_nominee/award_nominations./award/award_nomination/award	/m/09sb52
/m/03rk0	/location/statistical_region/gdp_real./measurement_unit/adjusted_money_value/adjustment_currency	/m/09nqf
/m/0j3b	/location/location/adjoin_s./location/adjoining_relationship/adjoins	/m/059f4
/m/0h0wd9	/film/film/film_festivals	/m/059_y8d
/m/0l14md	/music/performance_role/regular_performances./music/group_membership/group	/m/07rnh
/m/0gfh84d	/film/film/release_date_s./film/film_regional_release_date/film_release_region	/m/0chghy
/m/019vhk	/film/film/estimated_budget./measurement_unit/dated_money_value/currency	/m/09nqf
/m/012xdf	/sports/pro_athlete/teams./sports/sports_team_roster/team	/m/0bwjj
/m/0h3y	/olympics/olympic_participating_country/athletes./olympics/olympic_athlete_affiliation/olympics	/m/06sks6
/m/0bx8pn	/education/educational_institution/students_graduates./education/education/student	/m/042f1
/m/0dgrmp	/sports/sports_position/players./sports/sports_team_roster/team	/m/03fhml
/m/02s2lg	/base/x2010fifaworldcupsouthafrica/world_cup_squad/current_world_cup_squad./base/x2010fifaworldcupsouthafrica/current_world_cup_squad/current_club	/m/0cttx
/m/01tspc6	/award/award_nominee/award_nominations./award/award_nomination/award	/m/09qwmm
/m/01vv6_6	/music/artist/track_contributions./music/track_contribution/role	/m/02sgy
/m/0401sg	/film/film/release_date_s./film/film_regional_release_date/film_release_region	/m/0f8l9c
/m/047xyn	/award/award_category/winners./award/award_honor/award_winner	/m/0jt90f5
/m/0gk4g	/people/cause_of_death/people	/m/0hsmh
/m/01l_yg	/people/person/spouse_s./people/marriage/type_of_union	/m/04ztj
/m/0qm9n	/film/film/release_date_s./film/film_regional_release_date/film_release_region	/m/0d0vqn
/m/0gkz15s	/film/film/release_date_s./film/film_regional_release_date/film_release_region	/m/07ylj
/m/017yxq	/people/person/profession	/m/0dxtg
/m/01k_mc	/people/person/profession	/m/016z4k
/m/0qm9n	/film/film/genre	/m/07s9rl0
/m/0lccn	/music/artist/track_contributions./music/track_contribution/role	/m/01vdm0
/m/03jg5t	/sports/pro_athlete/teams./sports/sports_team_roster/team	/m/02b168
/m/015npr	/people/person/nationality	/m/03rk0
/m/02c0mv	/tv/tv_producer/programs_produced./tv/tv_producer_term/program	/m/01_2n
/m/0g2c8	/award/hall_of_fame/inductees./award/hall_of_fame_induction/inductee	/m/01wz_ml
/m/045hz5	/people/person/religion	/m/0flw86
/m/0bcndz	/award/award_winning_work/awards_won./award/award_honor/honored_for	/m/0k4kk
/m/01f_3w	/music/record_label/artist	/m/02ktrs
/m/02jztz	/organization/endowed_organization/endowment./measurement_unit/dated_money_value/currency	/m/09nqf
/m/03crcpt	/award/award_nominee/award_nominations./award/award_nomination/award	/m/02qyntr
/m/0f0kz	/award/award_nominee/award_nominations./award/award_nomination/award_nominee	/m/09wj5
/m/040wdl	/people/person/places_lived./people/place_lived/location	/m/055vr
/m/01vdm0	/music/performance_role/track_performances./music/track_contribution/role	/m/011_6p
/m/0g293	/music/genre/artists	/m/02qlg7s
/m/01rhl	/music/performance_role/track_performances./music/track_contribution/role	/m/0myk8
/m/0745k7	/award/award_nominee/award_nominations./award/award_nomination/award	/m/09qvc0
/m/087vz	/olympics/olympic_participating_country/athletes./olympics/olympic_athlete_affiliation/olympics	/m/0jhn7
/m/027pfg	/film/film/release_date_s./film/film_regional_release_date/film_release_region	/m/06t2t
/m/0dx97	/people/person/gender	/m/05zppz
/m/05m_8	/sports/sports_team/roster./baseball/baseball_roster_position/position	/m/049k4w
/m/0l14md	/music/performance_role/regular_performances./music/group_membership/group	/m/02vgh
/m/02mmwk	/film/film/other_crew./film/film_crew_gig/film_crew_role	/m/09vw2b7
/m/01n7q	/location/location/contains	/m/02pptm
/m/01r_t_	/award/award_nominee/award_nominations./award/award_nomination/award	/m/04zx08r
/m/012w70	/language/human_language/countries_spoken_in	/m/0d05w3
/m/0cqhk0	/award/award_category/winners./award/award_honor/award_winner	/m/04cl1
/m/01w9wwg	/award/award_nominee/award_nominations./award/award_nomination/award	/m/03t5n3
/m/0x67	/people/ethnicity/people	/m/05mt_q
/m/01jq4b	/education/university/local_tuition./measurement_unit/dated_money_value/currency	/m/09nqf
/m/01g7_r	/business/business_operation/assets./measurement_unit/dated_money_value/currency	/m/09nqf
/m/0pd64	/film/film/release_date_s./film/film_regional_release_date/film_release_region	/m/0jgd
/m/02r8hh_	/film/film/release_date_s./film/film_regional_release_date/film_release_region	/m/0b90_r
/m/02n4kr	/media_common/netflix_genre/titles	/m/011ywj
/m/04m1bm	/film/film/genre	/m/07s9rl0
/m/0grjmv	/music/genre/artists	/m/01wdcxk
/m/03ktjq	/people/person/spouse_s./people/marriage/type_of_union	/m/04ztj
/m/011yxg	/award/award_winning_work/awards_won./award/award_honor/award_winner	/m/05y7hc
/m/04ztj	/people/marriage_union_type/unions_of_this_type./people/marriage/location_of_ceremony	/m/02z0j
/m/014mlp	/education/educational_degree/people_with_this_degree./education/education/student	/m/0d0l91
/m/037mh8	/education/field_of_study/students_majoring./education/education/student	/m/02kxbwx
/m/01pcj4	/education/educational_institution/students_graduates./education/education/student	/m/01fxfk
/m/0509bl	/award/award_nominee/award_nominations./award/award_nomination/award_nominee	/m/0blbxk
/m/01ry_x	/film/film/genre	/m/04xvh5
/m/0p9tm	/film/film/genre	/m/0556j8
/m/01hhvg	/education/university/local_tuition./measurement_unit/dated_money_value/currency	/m/09nqf
/m/0h32q	/people/person/sibling_s./people/sibling_relationship/sibling	/m/01fdc0
/m/065jlv	/film/actor/film./film/performance/film	/m/031786
/m/0jqj5	/film/film/story_by	/m/02l5rm
/m/03hp2y1	/film/film/estimated_budget./measurement_unit/dated_money_value/currency	/m/09nqf
/m/0289q	/sports/sports_team/roster./american_football/football_historical_roster_position/position_s	/m/0bgv4g
/m/0487_	/sports/professional_sports_team/draft_picks./sports/sports_league_draft_pick/draft	/m/09l0x9
/m/017z88	/education/educational_institution/students_graduates./education/education/student	/m/01ycfv
/m/07tw_b	/film/film/written_by	/m/052hl
/m/01tspc6	/film/actor/film./film/performance/film	/m/0bh8drv
/m/05hjnw	/award/award_winning_work/awards_won./award/award_honor/award	/m/04dn09n
/m/0crx5w	/award/award_nominee/award_nominations./award/award_nomination/award_nominee	/m/01l_yg
/m/017yxq	/people/person/places_lived./people/place_lived/location	/m/030qb3t
/m/05b4w	/olympics/olympic_participating_country/medals_won./olympics/olympic_medal_honor/olympics	/m/0swbd
/m/0frq6	/food/food/nutrients./food/nutrition_fact/nutrient	/m/0f4k5
/m/047gpsd	/film/film/other_crew./film/film_crew_gig/film_crew_role	/m/0ch6mp2
/m/054krc	/award/award_category/nominees./award/award_nomination/nominated_for	/m/0661ql3
/m/048scx	/film/film/language	/m/06b_j
/m/02f716	/award/award_category/winners./award/award_honor/award_winner	/m/01v_pj6
/m/018_q8	/business/business_operation/assets./measurement_unit/dated_money_value/currency	/m/09nqf
/m/0gj9qxr	/film/film/release_date_s./film/film_regional_release_date/film_release_region	/m/0jgd
/m/040njc	/award/award_category/nominees./award/award_nomination/nominated_for	/m/07j8r
/m/01rc4p	/people/person/place_of_birth	/m/094jv
/m/01nms7	/people/person/languages	/m/02h40lc
/m/0jm74	/sports/professional_sports_team/draft_picks./sports/sports_league_draft_pick/school	/m/0bx8pn
/m/05d7rk	/people/person/gender	/m/05zppz
/m/07g9f	/tv/tv_program/genre	/m/05p553
/m/0275_pj	/award/award_winner/awards_won./award/award_honor/award_winner	/m/0265v21
/m/0l14md	/music/performance_role/regular_performances./music/group_membership/group	/m/01jcxwp
/m/01xdf5	/people/person/spouse_s./people/marriage/type_of_union	/m/04ztj
/m/01ym8l	/base/schemastaging/organization_extra/phone_number./base/schemastaging/phone_sandbox/contact_category	/m/03w5xm
/m/0pvms	/film/film/estimated_budget./measurement_unit/dated_money_value/currency	/m/09nqf
/m/02ryx0	/people/person/gender	/m/05zppz
/m/0h32q	/award/award_nominee/award_nominations./award/award_nomination/award	/m/0bfvw2
/m/0bgv4g	/sports/sports_position/players./sports/sports_team_roster/team	/m/0fht9f
/m/026v5	/organization/organization/headquarters./location/mailing_address/state_province_region	/m/05k7sb
/m/0clvcx	/award/award_nominee/award_nominations./award/award_nomination/award_nominee	/m/02w9895
/m/0czp_	/award/award_category/winners./award/award_honor/ceremony	/m/05hmp6
/m/021vwt	/award/award_nominee/award_nominations./award/award_nomination/award_nominee	/m/02ch1w
/m/019m60	/soccer/football_team/current_roster./soccer/football_roster_position/position	/m/0dgrmp
/m/0gcpc	/film/film/genre	/m/07s9rl0
/m/09vzz	/education/educational_institution/colors	/m/019sc
/m/05r5w	/base/popstra/celebrity/dated./base/popstra/dated/participant	/m/02qjj7
/m/01s695	/award/award_ceremony/awards_presented./award/award_honor/award_winner	/m/01vs_v8
/m/0bs5k8r	/film/film/genre	/m/04t36
/m/01pfkw	/people/person/employment_history./business/employment_tenure/company	/m/01q940
/m/018417	/award/award_nominee/award_nominations./award/award_nomination/award_nominee	/m/05kh_
/m/04nfpk	/sports/sports_position/players./sports/sports_team_roster/team	/m/01xvb
/m/0mdqp	/people/person/places_lived./people/place_lived/location	/m/030qb3t
/m/0154qm	/award/award_nominee/award_nominations./award/award_nomination/award_nominee	/m/01ps2h8
/m/027xx3	/education/educational_institution/students_graduates./education/education/major_field_of_study	/m/02lp1
/m/03bxbql	/military/military_combatant/military_conflicts./military/military_combatant_group/combatants	/m/05qhw
/m/04dn09n	/award/award_category/winners./award/award_honor/award_winner	/m/0hw1j
/m/01y8cr	/film/actor/film./film/performance/film	/m/097zcz
/m/03gj2	/location/statistical_region/gdp_real./measurement_unit/adjusted_money_value/adjustment_currency	/m/09nqf
/m/01cszh	/music/record_label/artist	/m/0394y
/m/02p2zq	/music/group_member/membership./music/group_membership/group	/m/014kyy
/m/08n9ng	/people/person/gender	/m/05zppz
/m/0c3kw	/award/award_nominee/award_nominations./award/award_nomination/award	/m/01bb1c
/m/04kxsb	/award/award_category/winners./award/award_honor/award_winner	/m/040z9
/m/0bdwqv	/award/award_category/winners./award/award_honor/award_winner	/m/03xkps
/m/040b5k	/film/film/film_format	/m/07fb8_
/m/011_6p	/music/performance_role/track_performances./music/track_contribution/role	/m/0l15bq
/m/042l3v	/award/award_nominee/award_nominations./award/award_nomination/nominated_for	/m/0pv2t
/m/043g7l	/music/record_label/artist	/m/011vx3
/m/0sxns	/film/film/genre	/m/07s9rl0
/m/0d8lm	/music/performance_role/guest_performances./music/recording_contribution/performance_role	/m/0l14j_
/m/06dn58	/people/person/religion	/m/0c8wxp
/m/05mt6w	/award/award_nominee/award_nominations./award/award_nomination/award	/m/025m8y
/m/03fbb6	/film/actor/film./film/performance/film	/m/0bth54
/m/0crx5w	/people/person/profession	/m/0dxtg
/m/06thjt	/education/educational_institution/students_graduates./education/education/student	/m/019l68
/m/0488g9	/people/person/gender	/m/05zppz
/m/01ptt7	/organization/endowed_organization/endowment./measurement_unit/dated_money_value/currency	/m/09nqf
/m/0m66w	/award/award_winner/awards_won./award/award_honor/award_winner	/m/070j61
/m/0879bpq	/film/film/release_date_s./film/film_regional_release_date/film_release_region	/m/0jgd
/m/05zvj3m	/award/award_category/nominees./award/award_nomination/nominated_for	/m/05567m
/m/02_xgp2	/education/educational_degree/people_with_this_degree./education/education/institution	/m/01l8t8
/m/01914	/location/location/adjoin_s./location/adjoining_relationship/adjoins	/m/0jk_8
/m/01vvb4m	/people/person/spouse_s./people/marriage/location_of_ceremony	/m/03gh4
/m/014knw	/film/film/release_date_s./film/film_regional_release_date/film_release_region	/m/030qb3t
/m/02js9p	/award/award_nominee/award_nominations./award/award_nomination/award_nominee	/m/02bj6k
/m/049_zz	/base/schemastaging/person_extra/net_worth./measurement_unit/dated_money_value/currency	/m/09nqf
/m/026mg3	/award/award_category/winners./award/award_honor/ceremony	/m/09n4nb
/m/02fm4d	/award/award_category/winners./award/award_honor/ceremony	/m/019bk0
/m/02z2xdf	/award/award_nominee/award_nominations./award/award_nomination/award	/m/040njc
/m/04jm_hq	/film/film/other_crew./film/film_crew_gig/film_crew_role	/m/0215hd
/m/05m883	/people/person/profession	/m/0dxtg
/m/012vby	/award/award_nominee/award_nominations./award/award_nomination/award_nominee	/m/01pp3p
/m/076psv	/people/person/profession	/m/089fss
/m/01v42g	/award/award_nominee/award_nominations./award/award_nomination/award	/m/09sb52
/m/01vttb9	/award/award_nominee/award_nominations./award/award_nomination/award	/m/0gqz2
/m/020d5	/location/country/capital	/m/0fttg
/m/09f0bj	/film/actor/film./film/performance/film	/m/02d413
/m/01rr_d	/education/educational_degree/people_with_this_degree./education/education/institution	/m/01n951
/m/02gyl0	/people/person/place_of_birth	/m/0fhp9
/m/054ky1	/award/award_category/winners./award/award_honor/award_winner	/m/0k9j_
/m/0nhmw	/location/statistical_region/rent50_2./measurement_unit/dated_money_value/currency	/m/09nqf
/m/01g3gq	/film/film/language	/m/02h40lc
/m/05y7hc	/people/person/gender	/m/05zppz
/m/031sg0	/base/popstra/celebrity/breakup./base/popstra/breakup/participant	/m/0l786
/m/026sv5l	/people/person/nationality	/m/03rk0
/m/0hx4y	/film/film/other_crew./film/film_crew_gig/crewmember	/m/03r1pr
/m/04smkr	/award/award_winner/awards_won./award/award_honor/award_winner	/m/0crvfq
/m/0ndsl1x	/film/film/release_date_s./film/film_regional_release_date/film_release_region	/m/07f1x
/m/0d05w3	/location/statistical_region/places_exported_to./location/imports_and_exports/exported_to	/m/01z88t
/m/0mp3l	/location/location/time_zones	/m/02hcv8
/m/0c6vcj	/award/award_ceremony/awards_presented./award/award_honor/award_winner	/m/0gv40
/m/0193qj	/military/military_combatant/military_conflicts./military/military_combatant_group/combatants	/m/03gj2
/m/01g7_r	/education/educational_institution/students_graduates./education/education/major_field_of_study	/m/037mh8
/m/0b13yt	/sports/sports_position/players./sports/sports_team_roster/team	/m/05g3b
/m/037ls6	/food/food/nutrients./food/nutrition_fact/nutrient	/m/02kc008
/m/027lfrs	/people/person/gender	/m/05zppz
/m/0gy6z9	/award/award_nominee/award_nominations./award/award_nomination/award_nominee	/m/042xrr
/m/02bq1j	/education/educational_institution/students_graduates./education/education/student	/m/0157m
/m/0m68w	/film/actor/film./film/performance/film	/m/0pk1p
/m/08052t3	/film/film/release_date_s./film/film_regional_release_date/film_release_region	/m/015fr
/m/0l14qv	/music/performance_role/regular_performances./music/group_membership/role	/m/0gkd1
/m/07s9rl0	/media_common/netflix_genre/titles	/m/03p2xc
/m/02mt4k	/award/award_winner/awards_won./award/award_honor/award_winner	/m/02l4pj
/m/09fn1w	/film/film/estimated_budget./measurement_unit/dated_money_value/currency	/m/02gsvk
/m/026p4q7	/award/award_winning_work/awards_won./award/award_honor/award_winner	/m/027zz
/m/039bpc	/base/popstra/celebrity/friendship./base/popstra/friendship/participant	/m/01pw2f1
/m/01hvv0	/tv/tv_program/genre	/m/05p553
/m/054ks3	/award/award_category/winners./award/award_honor/award_winner	/m/01v0fn1
/m/01rr_d	/education/educational_degree/people_with_this_degree./education/education/institution	/m/01wrwf
/m/03h_9lg	/award/award_nominee/award_nominations./award/award_nomination/award_nominee	/m/036hf4
/m/01r_t_	/award/award_nominee/award_nominations./award/award_nomination/nominated_for	/m/01sby_
/m/01fbr2	/music/genre/artists	/m/0lgm5
/m/02r8hh_	/film/film/estimated_budget./measurement_unit/dated_money_value/currency	/m/09nqf
/m/05cl8y	/music/record_label/artist	/m/01vv6_6
/m/0lwkz	/location/administrative_division/country	/m/0f8l9c
/m/09gdh6k	/film/film/genre	/m/02n4kr
/m/070j61	/film/director/film	/m/03bzyn4
/m/01gg59	/people/person/profession	/m/028kk_
/m/03q45x	/people/person/spouse_s./people/marriage/type_of_union	/m/04ztj
/m/0dgrmp	/sports/sports_position/players./sports/sports_team_roster/team	/m/031zp2
/m/06msq2	/award/award_nominee/award_nominations./award/award_nomination/award_nominee	/m/01j7rd
/m/0cqhk0	/award/award_category/winners./award/award_honor/award_winner	/m/030znt
/m/083chw	/award/award_nominee/award_nominations./award/award_nomination/award_nominee	/m/0382m4
/m/05mxw33	/people/person/profession	/m/01c72t
/m/01nms7	/people/person/places_lived./people/place_lived/location	/m/030qb3t
/m/072hx4	/award/award_winning_work/awards_won./award/award_honor/award_winner	/m/055c8
/m/015k7	/people/person/spouse_s./people/marriage/type_of_union	/m/04ztj
/m/02qx5h	/film/actor/film./film/performance/film	/m/04v89z
/m/06w92	/base/aareas/schema/administrative_area/capital	/m/09pxc
/m/0135xb	/award/award_nominee/award_nominations./award/award_nomination/award	/m/01bgqh
/m/037njl	/education/educational_institution/students_graduates./education/education/major_field_of_study	/m/01lj9
/m/03djpm	/music/genre/artists	/m/01271h
/m/017gl1	/film/film/story_by	/m/041h0
/m/02jxkw	/award/award_nominee/award_nominations./award/award_nomination/award	/m/054krc
/m/01ty4	/people/person/spouse_s./people/marriage/type_of_union	/m/04ztj
/m/02lz1s	/people/person/spouse_s./people/marriage/type_of_union	/m/04ztj
/m/0hl3d	/people/person/nationality	/m/0f8l9c
/m/02bqm0	/government/legislative_session/members./government/government_position_held/legislative_sessions	/m/02gkzs
/m/01n7q	/location/location/contains	/m/0r4h3
/m/02wlk	/people/person/gender	/m/05zppz
/m/0pd64	/film/film/production_companies	/m/016tt2
/m/08w6v_	/award/award_nominee/award_nominations./award/award_nomination/nominated_for	/m/01b65l
/m/05f260	/film/film_distributor/films_distributed./film/film_film_distributor_relationship/film	/m/016ywb
/m/0c38gj	/film/film/other_crew./film/film_crew_gig/film_crew_role	/m/0ch6mp2
/m/09d5d5	/award/award_nominee/award_nominations./award/award_nomination/award	/m/040njc
/m/02d413	/film/film/genre	/m/07s9rl0
/m/09wj5	/people/person/gender	/m/05zppz
/m/0h1nt	/award/award_nominee/award_nominations./award/award_nomination/award	/m/09sb52
/m/01gssm	/government/legislative_session/members./government/government_position_held/district_represented	/m/05k7sb
/m/05hjnw	/film/film/language	/m/02h40lc
/m/0194zl	/film/film/genre	/m/07s9rl0
/m/04yc76	/film/film/genre	/m/05p553
/m/0cz_ym	/film/film/produced_by	/m/04wvhz
/m/01w4c9	/music/performance_role/track_performances./music/track_contribution/role	/m/01vdm0
/m/02sgy	/music/performance_role/regular_performances./music/group_membership/role	/m/0l14md
/m/04kxsb	/award/award_category/nominees./award/award_nomination/nominated_for	/m/0yzvw
/m/0cjcbg	/award/award_category/nominees./award/award_nomination/nominated_for	/m/07vqnc
/m/01wj18h	/people/person/employment_history./business/employment_tenure/company	/m/043g7l
/m/01gpy4	/base/aareas/schema/administrative_area/administrative_parent	/m/0h7x
/m/04gdr	/location/location/time_zones	/m/02llzg
/m/016tvq	/award/award_winning_work/awards_won./award/award_honor/award_winner	/m/07jrjb
/m/06cgy	/award/award_winner/awards_won./award/award_honor/award_winner	/m/0169dl
/m/06c1y	/organization/organization_member/member_of./organization/organization_membership/organization	/m/01rz1
/m/01lyv	/music/genre/artists	/m/07m4c
/m/05cx7x	/award/award_nominee/award_nominations./award/award_nomination/award_nominee	/m/019pm_
/m/06t2t	/sports/sports_team_location/teams	/m/04h54p
/m/05pxnmb	/film/film/other_crew./film/film_crew_gig/film_crew_role	/m/01pvkk
/m/03cw411	/film/film/film_festivals	/m/0hrcs29
/m/02m4yg	/education/educational_degree/people_with_this_degree./education/education/institution	/m/01dbns
/m/0fxky3	/people/person/spouse_s./people/marriage/type_of_union	/m/04ztj
/m/03qlv7	/music/performance_role/regular_performances./music/group_membership/role	/m/0l14md
/m/0bynt	/olympics/olympic_sport/athletes./olympics/olympic_athlete_affiliation/country	/m/035dk
/m/0n_hp	/film/film/language	/m/02h40lc
/m/011yxg	/award/award_winning_work/awards_won./award/award_honor/award	/m/0gs96
/m/01l8t8	/education/university/local_tuition./measurement_unit/dated_money_value/currency	/m/09nqf
/m/0c1jh	/influence/influence_node/influenced_by	/m/084nh
/m/06bw5	/business/business_operation/revenue./measurement_unit/dated_money_value/currency	/m/09nqf
/m/0dgrmp	/sports/sports_position/players./sports/sports_team_roster/team	/m/048xg8
/m/069vt	/base/schemastaging/organization_extra/phone_number./base/schemastaging/phone_sandbox/service_location	/m/0chghy
/m/0b6l1st	/film/film/genre	/m/07s9rl0
/m/06hhrs	/award/award_nominee/award_nominations./award/award_nomination/award_nominee	/m/02kxbwx
/m/0kv238	/film/film/other_crew./film/film_crew_gig/film_crew_role	/m/09vw2b7
/m/01t9qj_	/award/award_nominee/award_nominations./award/award_nomination/award_nominee	/m/02x0bdb
/m/03rwng	/people/person/place_of_birth	/m/0d9jr
/m/01qh7	/location/location/contains	/m/01k7xz
/m/01nbq4	/people/person/languages	/m/02h40lc
/m/01bgqh	/award/award_category/winners./award/award_honor/award_winner	/m/0140t7
/m/01kr6k	/business/job_title/people_with_this_title./business/employment_tenure/company	/m/01npw8
/m/02h4rq6	/education/educational_degree/people_with_this_degree./education/education/major_field_of_study	/m/02h40lc
/m/02y9ln	/people/person/spouse_s./people/marriage/type_of_union	/m/04ztj
/m/04dn09n	/award/award_category/nominees./award/award_nomination/nominated_for	/m/06x77g
/m/02dq8f	/education/educational_institution/students_graduates./education/education/student	/m/04wg38
/m/039xcr	/people/deceased_person/place_of_death	/m/0k049
/m/0d06m5	/people/person/spouse_s./people/marriage/spouse	/m/0157m
/m/05842k	/music/performance_role/track_performances./music/track_contribution/role	/m/0mkg
/m/0jqj5	/award/award_winning_work/awards_won./award/award_honor/award	/m/02qyntr
/m/0bkf72	/award/award_nominee/award_nominations./award/award_nomination/award_nominee	/m/07b3r9
/m/035d1m	/olympics/olympic_sport/athletes./olympics/olympic_athlete_affiliation/country	/m/04hqz
/m/0ccd3x	/award/award_winning_work/awards_won./award/award_honor/award_winner	/m/012vby
/m/04ztj	/people/marriage_union_type/unions_of_this_type./people/marriage/location_of_ceremony	/m/0ply0
/m/014gf8	/award/award_nominee/award_nominations./award/award_nomination/award	/m/0bp_b2
/m/01r93l	/award/award_nominee/award_nominations./award/award_nomination/award	/m/09sb52
/m/025b5y	/people/person/languages	/m/02h40lc
/m/0484q	/people/person/gender	/m/05zppz
/m/02xbyr	/film/film/release_date_s./film/film_regional_release_date/film_release_region	/m/07ylj
/m/01rr_d	/education/educational_degree/people_with_this_degree./education/education/institution	/m/01_qgp
/m/0gs96	/award/award_category/winners./award/award_honor/ceremony	/m/059x66
/m/0hn821n	/award/award_ceremony/awards_presented./award/award_honor/award_winner	/m/0127m7
/m/02f6g5	/film/film/estimated_budget./measurement_unit/dated_money_value/currency	/m/09nqf
/m/09bw4_	/film/film/other_crew./film/film_crew_gig/film_crew_role	/m/0ch6mp2
/m/0c5lg	/tv/non_character_role/tv_regular_personal_appearances./tv/tv_regular_personal_appearance/person	/m/08y7b9
/m/0q9vf	/people/person/gender	/m/05zppz
/m/01vvydl	/award/award_winner/awards_won./award/award_honor/award_winner	/m/01vvyc_
/m/03r1pr	/people/person/gender	/m/05zppz
/m/02s8qk	/education/university/local_tuition./measurement_unit/dated_money_value/currency	/m/09nqf
/m/015t56	/award/award_winner/awards_won./award/award_honor/award_winner	/m/0154qm
/m/027_sn	/film/actor/film./film/performance/film	/m/01hp5
/m/0l14md	/music/performance_role/track_performances./music/track_contribution/role	/m/01679d
/m/059_gf	/film/actor/film./film/performance/film	/m/05k4my
/m/05pdh86	/film/film/release_date_s./film/film_regional_release_date/film_release_region	/m/06npd
/m/0b6k___	/award/award_category/winners./award/award_honor/award_winner	/m/08hhm6
/m/043n1r5	/film/film/estimated_budget./measurement_unit/dated_money_value/currency	/m/09nqf
/m/08rr3p	/film/film/genre	/m/02l7c8
/m/05p9_ql	/tv/tv_program/regular_cast./tv/regular_tv_appearance/actor	/m/0633p0
/m/0jtg0	/music/performance_role/track_performances./music/track_contribution/role	/m/03qlv7
/m/014v1q	/people/person/profession	/m/0np9r
/m/01hx2t	/education/university/domestic_tuition./measurement_unit/dated_money_value/currency	/m/09nqf
/m/06sw9	/location/country/official_language	/m/064_8sq
/m/02lyr4	/sports/sports_position/players./sports/sports_team_roster/team	/m/07l4z
/m/0bdjd	/film/film/estimated_budget./measurement_unit/dated_money_value/currency	/m/09nqf
/m/015fr	/military/military_combatant/military_conflicts./military/military_combatant_group/combatants	/m/087vz
/m/017jd9	/award/award_winning_work/awards_won./award/award_honor/award_winner	/m/04ktcgn
/m/0dgrmp	/sports/sports_position/players./sports/sports_team_roster/team	/m/02b153
/m/01f_3w	/music/record_label/artist	/m/039bpc
/m/0126rp	/people/person/gender	/m/05zppz
/m/04t38b	/award/award_nominee/award_nominations./award/award_nomination/nominated_for	/m/0140g4
/m/060__7	/film/film/language	/m/02h40lc
/m/049l7	/people/person/spouse_s./people/marriage/type_of_union	/m/04ztj
/m/07tgn	/education/educational_institution/students_graduates./education/education/student	/m/098sx
/m/06b_0	/people/person/place_of_birth	/m/05qtj
/m/03djpm	/music/genre/parent_genre	/m/0163zw
/m/026m9w	/award/award_category/winners./award/award_honor/ceremony	/m/013b2h
/m/02gs6r	/film/film/genre	/m/0jxy
/m/0140t7	/music/group_member/membership./music/group_membership/role	/m/0l14md
/m/0d0vqn	/organization/organization_member/member_of./organization/organization_membership/organization	/m/02jxk
/m/083chw	/people/person/gender	/m/05zppz
/m/03p2xc	/film/film/genre	/m/07s9rl0
/m/017l4	/music/artist/track_contributions./music/track_contribution/role	/m/01vdm0
/m/05pdh86	/film/film/release_date_s./film/film_regional_release_date/film_release_region	/m/06c1y
/m/0k269	/film/actor/film./film/performance/film	/m/0dfw0
/m/025vry	/people/person/nationality	/m/0h7x
/m/0gy6z9	/award/award_nominee/award_nominations./award/award_nomination/award_nominee	/m/016vg8
/m/0343h	/organization/organization_founder/organizations_founded	/m/0kx4m
/m/018_q8	/business/business_operation/revenue./measurement_unit/dated_money_value/currency	/m/09nqf
/m/02778yp	/people/person/spouse_s./people/marriage/type_of_union	/m/04ztj
/m/0372p	/influence/influence_node/influenced_by	/m/05qmj
/m/0l14md	/music/performance_role/guest_performances./music/recording_contribution/performance_role	/m/0l15bq
/m/040v3t	/award/award_category/winners./award/award_honor/award_winner	/m/0jt90f5
/m/090q8l	/soccer/football_team/current_roster./soccer/football_roster_position/position	/m/0dgrmp
/m/027hjff	/award/award_ceremony/awards_presented./award/award_honor/award_winner	/m/02ktrs
/m/0crx5w	/award/award_nominee/award_nominations./award/award_nomination/award_nominee	/m/03wh8kl
/m/01679d	/music/performance_role/track_performances./music/track_contribution/role	/m/0mkg
/m/0d2fd7	/business/business_operation/operating_income./measurement_unit/dated_money_value/currency	/m/09nqf
/m/05r5w	/award/award_nominee/award_nominations./award/award_nomination/award	/m/05p09zm
/m/037hgm	/music/artist/contribution./music/recording_contribution/performance_role	/m/0l14md
/m/02qtywd	/award/award_nominee/award_nominations./award/award_nomination/award_nominee	/m/045zr
/m/0gr4k	/award/award_category/nominees./award/award_nomination/nominated_for	/m/0cq806
/m/0kp2_	/people/person/gender	/m/05zppz
/m/0bp_b2	/award/award_category/nominees./award/award_nomination/nominated_for	/m/0fhzwl
/m/0q9t7	/people/person/profession	/m/0dxtg
/m/027rwmr	/award/award_nominee/award_nominations./award/award_nomination/nominated_for	/m/07nxnw
/m/0m66w	/award/award_winner/awards_won./award/award_honor/award_winner	/m/046b0s
/m/02zq43	/people/person/gender	/m/05zppz
/m/02h4rq6	/education/educational_degree/people_with_this_degree./education/education/institution	/m/05ftw3
/m/08c9b0	/people/person/profession	/m/0dxtg
/m/05qbckf	/film/film/personal_appearances./film/personal_film_appearance/person	/m/079vf
/m/02rdxsh	/award/award_category/nominees./award/award_nomination/nominated_for	/m/03qnc6q
/m/07cdz	/award/award_winning_work/awards_won./award/award_honor/award	/m/02qyntr
/m/0pksh	/people/person/spouse_s./people/marriage/type_of_union	/m/04ztj
/m/02cft	/travel/travel_destination/how_to_get_here./travel/transportation/mode_of_transportation	/m/07jdr
/m/07f1x	/military/military_combatant/military_conflicts./military/military_combatant_group/combatants	/m/0chghy
/m/0k20s	/film/film/written_by	/m/01q4qv
/m/01v1d8	/music/instrument/instrumentalists	/m/01yzl2
/m/05k7sb	/location/location/contains	/m/01gr00
/m/01lhdt	/education/educational_institution/students_graduates./education/education/student	/m/07dnx
/m/040z9	/people/person/places_lived./people/place_lived/location	/m/030qb3t
/m/0gk4g	/people/cause_of_death/people	/m/0bkmf
/m/01b_lz	/tv/tv_program/regular_cast./tv/regular_tv_appearance/actor	/m/03sww
/m/0h3mh3q	/tv/tv_program/languages	/m/02h40lc
/m/01k2wn	/education/educational_institution/students_graduates./education/education/major_field_of_study	/m/02h40lc
/m/02p65p	/award/award_nominee/award_nominations./award/award_nomination/award_nominee	/m/04smkr
/m/01nhkxp	/award/award_nominee/award_nominations./award/award_nomination/award_nominee	/m/01vvydl
/m/030znt	/award/award_nominee/award_nominations./award/award_nomination/award	/m/02x4x18
/m/0g2c8	/award/hall_of_fame/inductees./award/hall_of_fame_induction/inductee	/m/014kyy
/m/076psv	/people/person/place_of_birth	/m/01sn3
/m/024dw0	/music/artist/track_contributions./music/track_contribution/role	/m/05842k
/m/0k2sk	/film/film/genre	/m/05p553
/m/0d2by	/people/ethnicity/people	/m/06s7rd
/m/0h336	/people/person/spouse_s./people/marriage/type_of_union	/m/04ztj
/m/03h_0_z	/people/person/languages	/m/02h40lc
/m/0fq7dv_	/film/film/release_date_s./film/film_regional_release_date/film_release_region	/m/0f8l9c
/m/0j_tw	/film/film/estimated_budget./measurement_unit/dated_money_value/currency	/m/09nqf
/m/064ndc	/film/film/other_crew./film/film_crew_gig/film_crew_role	/m/09vw2b7
/m/0319l	/music/performance_role/track_performances./music/track_contribution/role	/m/05842k
/m/02qgyv	/award/award_nominee/award_nominations./award/award_nomination/nominated_for	/m/06q8qh
/m/0jmmn	/sports/sports_team/roster./basketball/basketball_roster_position/position	/m/02_ssl
/m/0484q	/people/person/spouse_s./people/marriage/type_of_union	/m/04ztj
/m/03cz9_	/film/actor/film./film/performance/film	/m/02z9hqn
/m/03ynwqj	/film/film/executive_produced_by	/m/02lf0c
/m/0cvw9	/location/location/contains	/m/02kxx1
/m/0bpm4yw	/film/film/release_date_s./film/film_regional_release_date/film_release_region	/m/04hqz
/m/01v9l67	/film/actor/film./film/performance/film	/m/017jd9
/m/06x76	/sports/professional_sports_team/draft_picks./sports/sports_league_draft_pick/draft	/m/09l0x9
/m/072hx4	/film/film/release_date_s./film/film_regional_release_date/film_release_region	/m/0154j
/m/031x2	/military/military_conflict/combatants./military/military_combatant_group/combatants	/m/0jgd
/m/04l3_z	/people/person/gender	/m/05zppz
/m/0gyh2wm	/film/film/release_date_s./film/film_regional_release_date/film_release_region	/m/0jgd
/m/0686zv	/award/award_nominee/award_nominations./award/award_nomination/award_nominee	/m/02qgyv
/m/09qj50	/award/award_category/nominees./award/award_nomination/nominated_for	/m/0431v3
/m/0227tr	/award/award_nominee/award_nominations./award/award_nomination/award_nominee	/m/06g2d1
/m/09qvms	/award/award_ceremony/awards_presented./award/award_honor/award_winner	/m/01rzqj
/m/05q7cj	/award/award_ceremony/awards_presented./award/award_honor/award_winner	/m/01vvb4m
/m/08sfxj	/film/film/produced_by	/m/04w1j9
/m/0m66w	/award/award_winner/awards_won./award/award_honor/award_winner	/m/015c2f
/m/016ywb	/film/film/genre	/m/07s9rl0
/m/05pbl56	/film/film/language	/m/06b_j
/m/036hf4	/award/award_nominee/award_nominations./award/award_nomination/nominated_for	/m/03c7twt
/m/02w4v	/music/genre/artists	/m/0f_y9
/m/0dq3c	/business/job_title/people_with_this_title./business/employment_tenure/company	/m/01pf21
/m/073h9x	/award/award_ceremony/awards_presented./award/award_honor/award_winner	/m/04353
/m/02mhfy	/people/person/languages	/m/02h40lc
/m/026mg3	/award/award_category/winners./award/award_honor/award_winner	/m/025l5
/m/0fhp9	/location/location/time_zones	/m/02llzg
/m/083qy7	/soccer/football_player/current_team./sports/sports_team_roster/team	/m/01zhs3
/m/0194xc	/government/politician/government_positions_held./government/government_position_held/legislative_sessions	/m/02gkzs
/m/07s9rl0	/media_common/netflix_genre/titles	/m/02r858_
/m/0f5mdz	/people/person/spouse_s./people/marriage/type_of_union	/m/04ztj
/m/0yxl	/people/person/spouse_s./people/marriage/type_of_union	/m/04ztj
/m/054ky1	/award/award_category/winners./award/award_honor/award_winner	/m/039bp
/m/07s9rl0	/media_common/netflix_genre/titles	/m/03xf_m
/m/07tp2	/location/statistical_region/gdp_real./measurement_unit/adjusted_money_value/adjustment_currency	/m/09nqf
/m/04sry	/award/award_nominee/award_nominations./award/award_nomination/award	/m/0f_nbyh
/m/0457w0	/sports/pro_athlete/teams./sports/sports_team_roster/team	/m/01zhs3
/m/079ws	/people/person/profession	/m/0n1h
/m/06mm1x	/award/award_nominee/award_nominations./award/award_nomination/nominated_for	/m/07c72
/m/01vksx	/film/film/language	/m/02h40lc
/m/01dq0z	/organization/endowed_organization/endowment./measurement_unit/dated_money_value/currency	/m/0ptk_
/m/017z49	/film/film/genre	/m/0c3351
/m/04jkpgv	/film/film/release_date_s./film/film_regional_release_date/film_release_region	/m/07f1x
/m/01wmxfs	/people/person/profession	/m/0dxtg
/m/05yh_t	/people/person/gender	/m/05zppz
/m/060j8b	/base/popstra/celebrity/friendship./base/popstra/friendship/participant	/m/0fpj9pm
/m/054ky1	/award/award_category/winners./award/award_honor/award_winner	/m/0m593
/m/014mlp	/education/educational_degree/people_with_this_degree./education/education/institution	/m/01n6r0
/m/019z7q	/people/person/profession	/m/0dxtg
/m/0kvt9	/location/location/contains	/m/0r4qq
/m/07b8m1	/soccer/football_team/current_roster./soccer/football_roster_position/position	/m/0dgrmp
/m/07y9ts	/award/award_ceremony/awards_presented./award/award_honor/award_winner	/m/01bcq
/m/0b90_r	/location/location/adjoin_s./location/adjoining_relationship/adjoins	/m/01n7q
/m/06dv3	/award/award_nominee/award_nominations./award/award_nomination/award_nominee	/m/031k24
/m/02qk3fk	/film/film/genre	/m/07s9rl0
/m/05d7rk	/people/person/nationality	/m/03rk0
/m/03gt0c5	/people/person/spouse_s./people/marriage/type_of_union	/m/04ztj
/m/01svw8n	/award/award_nominee/award_nominations./award/award_nomination/award_nominee	/m/01qq_lp
/m/0frq6	/food/food/nutrients./food/nutrition_fact/nutrient	/m/09pbb
/m/0gzlb9	/film/film/executive_produced_by	/m/0ksf29
/m/01j6t0	/medicine/symptom/symptom_of	/m/074m2
/m/02py7pj	/award/award_category/winners./award/award_honor/award_winner	/m/0bw87
/m/0ndsl1x	/film/film/release_date_s./film/film_regional_release_date/film_release_region	/m/0chghy
/m/02xbyr	/film/film/release_date_s./film/film_regional_release_date/film_release_region	/m/0154j
/m/0127m7	/award/award_nominee/award_nominations./award/award_nomination/award	/m/04kxsb
/m/04gzd	/olympics/olympic_participating_country/athletes./olympics/olympic_athlete_affiliation/olympics	/m/06sks6
/m/080dyk	/soccer/football_player/current_team./sports/sports_team_roster/team	/m/01xn7x1
/m/01kff7	/film/film/produced_by	/m/01qg7c
/m/05_5rjx	/film/film/genre	/m/02n4kr
/m/04ddm4	/film/film/release_date_s./film/film_regional_release_date/film_release_region	/m/082fr
/m/05qbckf	/film/film/other_crew./film/film_crew_gig/film_crew_role	/m/09vw2b7
/m/0633p0	/people/person/places_lived./people/place_lived/location	/m/094jv
/m/048q6x	/award/award_nominee/award_nominations./award/award_nomination/award	/m/08_vwq
/m/0x0d	/sports/sports_team/colors	/m/019sc
/m/0x3n	/award/award_nominee/award_nominations./award/award_nomination/award	/m/054ks3
/m/0jdhp	/award/award_nominee/award_nominations./award/award_nomination/award_nominee	/m/01kstn9
/m/0gv2r	/award/award_nominee/award_nominations./award/award_nomination/award	/m/040njc
/m/01tcf7	/award/award_nominee/award_nominations./award/award_nomination/award	/m/09sb52
/m/0cjdk	/award/award_nominee/award_nominations./award/award_nomination/nominated_for	/m/025ts_z
/m/045j3w	/film/film/release_date_s./film/film_regional_release_date/film_release_region	/m/06qd3
/m/01h6pn	/base/culturalevent/event/entity_involved	/m/02psqkz
/m/0f0kz	/award/award_nominee/award_nominations./award/award_nomination/award_nominee	/m/015t56
/m/0gj96ln	/film/film/film_festivals	/m/0j63cyr
/m/0dgrmp	/sports/sports_position/players./sports/sports_team_roster/team	/m/03c0t9
/m/09sb52	/award/award_category/nominees./award/award_nomination/nominated_for	/m/011yph
/m/03ffcz	/tv/tv_program/genre	/m/04t36
/m/0g2c8	/business/business_operation/assets./measurement_unit/dated_money_value/currency	/m/09nqf
/m/0k3gj	/location/location/contains	/m/0tygl
/m/0l0wv	/base/schemastaging/organization_extra/phone_number./base/schemastaging/phone_sandbox/service_language	/m/02h40lc
/m/03vgp7	/award/award_nominee/award_nominations./award/award_nomination/award	/m/09sb52
/m/064_8sq	/media_common/netflix_genre/titles	/m/02q6gfp
/m/04n_g	/award/award_nominee/award_nominations./award/award_nomination/award	/m/0bdwqv
/m/04rwx	/education/educational_institution/students_graduates./education/education/major_field_of_study	/m/01lj9
/m/02kcz	/location/country/form_of_government	/m/06cx9
/m/09qj50	/award/award_category/nominees./award/award_nomination/nominated_for	/m/016tvq
/m/07zhjj	/tv/tv_program/genre	/m/0c4xc
/m/0myk8	/music/performance_role/track_performances./music/track_contribution/role	/m/01vdm0
/m/03sww	/people/person/gender	/m/05zppz
/m/02wgln	/award/award_nominee/award_nominations./award/award_nomination/nominated_for	/m/01hqhm
/m/01dw4q	/award/award_winner/awards_won./award/award_honor/award_winner	/m/05lb87
/m/0k9j_	/award/award_winner/awards_won./award/award_honor/award_winner	/m/02knnd
/m/013qvn	/people/person/gender	/m/05zppz
/m/05dmmc	/film/film/genre	/m/04t36
/m/02k_kn	/music/genre/artists	/m/015_30
/m/071t0	/olympics/olympic_sport/athletes./olympics/olympic_athlete_affiliation/country	/m/04hqz
/m/0b13yt	/sports/sports_position/players./sports/sports_team_roster/team	/m/06x76
/m/07tgn	/organization/organization/headquarters./location/mailing_address/state_province_region	/m/0jt5zcn
/m/05cx7x	/film/actor/film./film/performance/film	/m/03ynwqj
/m/07jnt	/film/film/estimated_budget./measurement_unit/dated_money_value/currency	/m/09nqf
/m/0642ykh	/film/film/other_crew./film/film_crew_gig/film_crew_role	/m/01pvkk
/m/0309lm	/people/person/place_of_birth	/m/0rrwt
/m/03j367r	/award/award_nominee/award_nominations./award/award_nomination/award	/m/09sb52
/m/078jt5	/people/person/gender	/m/05zppz
/m/01tcf7	/award/award_nominee/award_nominations./award/award_nomination/award_nominee	/m/02qgqt
/m/01kwsg	/award/award_nominee/award_nominations./award/award_nomination/award	/m/09sb52
/m/02pptm	/organization/endowed_organization/endowment./measurement_unit/dated_money_value/currency	/m/09nqf
/m/0g9wdmc	/film/film/release_date_s./film/film_regional_release_date/film_release_region	/m/07ylj
/m/03zqc1	/film/actor/film./film/performance/film	/m/01hqhm
/m/03qlv7	/music/instrument/instrumentalists	/m/07z542
/m/0gkz15s	/film/film/written_by	/m/0b455l
/m/0162c8	/film/director/film	/m/033qdy
/m/02s8qk	/education/university/domestic_tuition./measurement_unit/dated_money_value/currency	/m/09nqf
/m/0mdqp	/celebrities/celebrity/sexual_relationships./celebrities/romantic_relationship/celebrity	/m/03m8lq
/m/0h5f5n	/people/person/spouse_s./people/marriage/type_of_union	/m/04ztj
/m/01l1sq	/music/artist/track_contributions./music/track_contribution/role	/m/02sgy
/m/026yqrr	/award/award_nominee/award_nominations./award/award_nomination/award_nominee	/m/01vvydl
/m/01qscs	/people/person/places_lived./people/place_lived/location	/m/030qb3t
/m/01k3qj	/people/person/languages	/m/02h40lc
/m/04jjy	/film/film_subject/films	/m/01qbg5
/m/017jd9	/film/film/release_date_s./film/film_regional_release_date/film_release_region	/m/07f1x
/m/0gk4g	/people/cause_of_death/people	/m/0127gn
/m/0ndsl1x	/film/film/production_companies	/m/016tt2
/m/05lb87	/award/award_nominee/award_nominations./award/award_nomination/award_nominee	/m/05lb65
/m/0k2cb	/award/award_winning_work/awards_won./award/award_honor/award	/m/0gs96
/m/037ls6	/food/food/nutrients./food/nutrition_fact/nutrient	/m/01n78x
/m/018n6m	/award/award_nominee/award_nominations./award/award_nomination/award	/m/02f72n
/m/04smkr	/award/award_nominee/award_nominations./award/award_nomination/award_nominee	/m/03vgp7
/m/048wrb	/people/person/profession	/m/0dxtg
/m/03xf_m	/film/film/estimated_budget./measurement_unit/dated_money_value/currency	/m/09nqf
/m/07yvsn	/film/film/other_crew./film/film_crew_gig/film_crew_role	/m/04pyp5
/m/03c6v3	/people/person/religion	/m/0c8wxp
/m/02rfft	/business/business_operation/industry	/m/020mfr
/m/0227tr	/award/award_winner/awards_won./award/award_honor/award_winner	/m/06g2d1
/m/0l76z	/tv/tv_program/regular_cast./tv/regular_tv_appearance/actor	/m/01pcdn
/m/01hw5kk	/film/film/estimated_budget./measurement_unit/dated_money_value/currency	/m/09nqf
/m/0p_pd	/film/actor/film./film/performance/film	/m/08s6mr
/m/05k7sb	/location/location/contains	/m/01m2n1
/m/018swb	/people/person/gender	/m/05zppz
/m/01y998	/military/military_conflict/combatants./military/military_combatant_group/combatants	/m/0bq0p9
/m/01n7q	/location/location/contains	/m/0k049
/m/02y_lrp	/film/film/estimated_budget./measurement_unit/dated_money_value/currency	/m/09nqf
/m/05qbckf	/film/film/language	/m/064_8sq
/m/023r2x	/music/performance_role/track_performances./music/track_contribution/role	/m/0319l
/m/011wtv	/film/film/estimated_budget./measurement_unit/dated_money_value/currency	/m/09nqf
/m/045zr	/music/artist/track_contributions./music/track_contribution/role	/m/0l14md
/m/02w_6xj	/award/award_category/winners./award/award_honor/award_winner	/m/06pj8
/m/0z07	/base/schemastaging/organization_extra/phone_number./base/schemastaging/phone_sandbox/service_language	/m/02h40lc
/m/02_xgp2	/education/educational_degree/people_with_this_degree./education/education/major_field_of_study	/m/01lj9
/m/01xvb	/sports/professional_sports_team/draft_picks./sports/sports_league_draft_pick/draft	/m/05vsb7
/m/0661ql3	/film/film/release_date_s./film/film_regional_release_date/film_release_region	/m/0b90_r
/m/04kxsb	/award/award_category/nominees./award/award_nomination/nominated_for	/m/04m1bm
/m/07s8r0	/award/award_nominee/award_nominations./award/award_nomination/award_nominee	/m/06t74h
/m/07l24	/sports/professional_sports_team/draft_picks./sports/sports_league_draft_pick/draft	/m/03nt7j
/m/02v8kmz	/film/film/genre	/m/06nbt
/m/0h1nt	/award/award_nominee/award_nominations./award/award_nomination/nominated_for	/m/0qm9n
/m/01l9v7n	/award/award_nominee/award_nominations./award/award_nomination/award	/m/054krc
/m/0cqhk0	/award/award_category/nominees./award/award_nomination/nominated_for	/m/05p9_ql
/m/0gj9qxr	/film/film/production_companies	/m/05mgj0
/m/05pdd86	/film/film/language	/m/02h40lc
/m/02fybl	/people/person/places_lived./people/place_lived/location	/m/0846v
/m/03b1sb	/film/film/genre	/m/07s9rl0
/m/017jd9	/film/film/release_date_s./film/film_regional_release_date/film_release_region	/m/06c1y
/m/02fzs	/base/popstra/location/vacationers./base/popstra/vacation_choice/vacationer	/m/02v60l
/m/0gfh84d	/film/film/genre	/m/07s9rl0
/m/0pvms	/film/film/other_crew./film/film_crew_gig/film_crew_role	/m/0ch6mp2
/m/0dc_ms	/film/film/release_date_s./film/film_regional_release_date/film_release_region	/m/0f8l9c
/m/016vg8	/base/popstra/celebrity/canoodled./base/popstra/canoodled/participant	/m/0gy6z9
/m/01npw8	/business/business_operation/revenue./measurement_unit/dated_money_value/currency	/m/09nqf
/m/03nsm5x	/film/film/release_date_s./film/film_regional_release_date/film_release_region	/m/06qd3
/m/087vz	/military/military_combatant/military_conflicts./military/military_combatant_group/combatants	/m/0154j
/m/0h7x	/olympics/olympic_participating_country/athletes./olympics/olympic_athlete_affiliation/olympics	/m/0swbd
/m/0fthdk	/film/actor/film./film/performance/film	/m/0cfhfz
/m/04wvhz	/tv/tv_producer/programs_produced./tv/tv_producer_term/program	/m/02kk_c
/m/0mdqp	/film/actor/film./film/performance/film	/m/04gv3db
/m/0prfz	/award/award_nominee/award_nominations./award/award_nomination/award_nominee	/m/03h_9lg
/m/0kh6b	/people/person/sibling_s./people/sibling_relationship/sibling	/m/0kr5_
/m/03qd_	/base/schemastaging/person_extra/net_worth./measurement_unit/dated_money_value/currency	/m/09nqf
/m/01txts	/music/record_label/artist	/m/01nz1q6
/m/0g9wdmc	/film/film/release_date_s./film/film_regional_release_date/film_release_region	/m/03rk0
/m/0nryt	/location/location/time_zones	/m/02fqwt
/m/03l3ln	/people/person/gender	/m/05zppz
/m/01ffx4	/film/film/genre	/m/02l7c8
/m/03j70t	/soccer/football_team/current_roster./sports/sports_team_roster/position	/m/0dgrmp
/m/0221g_	/organization/endowed_organization/endowment./measurement_unit/dated_money_value/currency	/m/09nqf
/m/01hww_	/music/performance_role/track_performances./music/track_contribution/role	/m/07brj
/m/01ffx4	/film/film/release_date_s./film/film_regional_release_date/film_release_region	/m/0h7x
/m/02qgqt	/film/actor/film./film/performance/film	/m/02ylg6
/m/0g9z_32	/film/film/other_crew./film/film_crew_gig/film_crew_role	/m/09vw2b7
/m/06z8gn	/people/person/gender	/m/05zppz
/m/02h4rq6	/education/educational_degree/people_with_this_degree./education/education/institution	/m/01kvrz
/m/0l99s	/award/award_nominee/award_nominations./award/award_nomination/award	/m/0ddd9
/m/03cs_z7	/tv/tv_writer/tv_programs./tv/tv_program_writer_relationship/tv_program	/m/07zhjj
/m/073w14	/award/award_nominee/award_nominations./award/award_nomination/nominated_for	/m/026p4q7
/m/0432_5	/film/film/release_date_s./film/film_regional_release_date/film_release_region	/m/06qd3
/m/06t2t	/travel/travel_destination/climate./travel/travel_destination_monthly_climate/month	/m/028kb
/m/01p4vl	/award/award_nominee/award_nominations./award/award_nomination/nominated_for	/m/02bqvs
/m/0gx_st	/award/award_ceremony/awards_presented./award/award_honor/award_winner	/m/027cxsm
/m/06crng	/people/person/gender	/m/05zppz
/m/01wrcxr	/celebrities/celebrity/sexual_relationships./celebrities/romantic_relationship/celebrity	/m/015g_7
/m/0h1nt	/award/award_nominee/award_nominations./award/award_nomination/award_nominee	/m/09yhzs
/m/030hcs	/award/award_nominee/award_nominations./award/award_nomination/award	/m/0789_m
/m/03clwtw	/film/film/language	/m/02h40lc
/m/0dw4g	/music/artist/origin	/m/02cft
/m/0dgrmp	/sports/sports_position/players./sports/sports_team_roster/team	/m/08vk_r
/m/017d77	/education/educational_institution/students_graduates./education/education/student	/m/0prfz
/m/06sks6	/olympics/olympic_games/participating_countries	/m/0f8l9c
/m/0b6k___	/award/award_category/winners./award/award_honor/award_winner	/m/015npr
/m/0ndwt2w	/film/film/estimated_budget./measurement_unit/dated_money_value/currency	/m/09nqf
/m/01z7_f	/film/actor/film./film/performance/film	/m/0277j40
/m/01f2f8	/people/person/place_of_birth	/m/06c62
/m/02x0fs9	/film/film/other_crew./film/film_crew_gig/film_crew_role	/m/0ch6mp2
/m/0xzly	/music/performance_role/track_performances./music/track_contribution/role	/m/01vdm0
/m/01c22t	/film/film/other_crew./film/film_crew_gig/film_crew_role	/m/01pvkk
/m/078jt5	/award/award_nominee/award_nominations./award/award_nomination/award_nominee	/m/05cqhl
/m/0tfc	/influence/influence_node/influenced_by	/m/026lj
/m/0fzrtf	/award/award_ceremony/awards_presented./award/award_honor/award_winner	/m/02lz1s
/m/0gd92	/film/film/genre	/m/02l7c8
/m/017jd9	/award/award_winning_work/awards_won./award/award_honor/award	/m/0gs96
/m/0bs1g5r	/award/award_nominee/award_nominations./award/award_nomination/award	/m/03t5n3
/m/07tlfx	/film/film/executive_produced_by	/m/0b1f49
/m/0bfvw2	/award/award_category/winners./award/award_honor/award_winner	/m/031sg0
/m/04ztj	/people/marriage_union_type/unions_of_this_type./people/marriage/location_of_ceremony	/m/05b4w
/m/01v1d8	/music/instrument/instrumentalists	/m/01wbsdz
/m/03ktjq	/tv/tv_producer/programs_produced./tv/tv_producer_term/program	/m/03_b1g
/m/01r93l	/base/popstra/celebrity/friendship./base/popstra/friendship/participant	/m/0k269
/m/01q4qv	/award/award_nominee/award_nominations./award/award_nomination/award	/m/0gr4k
/m/0gs96	/award/award_category/nominees./award/award_nomination/nominated_for	/m/017gl1
/m/0ccck7	/film/film/release_date_s./film/film_regional_release_date/film_release_region	/m/0b90_r
/m/0fczy	/location/location/time_zones	/m/02hcv8
/m/023sng	/people/person/nationality	/m/03rk0
/m/0l14md	/music/performance_role/guest_performances./music/recording_contribution/performance_role	/m/01w4c9
/m/0gyh2wm	/film/film/release_date_s./film/film_regional_release_date/film_release_region	/m/047yc
/m/050rj	/music/performance_role/regular_performances./music/group_membership/role	/m/0l14md
/m/04ztj	/people/marriage_union_type/unions_of_this_type./people/marriage/location_of_ceremony	/m/019fh
/m/07cbs	/organization/organization_founder/organizations_founded	/m/07x4c
/m/04ztj	/people/marriage_union_type/unions_of_this_type./people/marriage/location_of_ceremony	/m/0gkgp
/m/07tds	/education/university/domestic_tuition./measurement_unit/dated_money_value/currency	/m/09nqf
/m/08c6k9	/film/film/film_format	/m/07fb8_
/m/0x3n	/award/award_nominee/award_nominations./award/award_nomination/award	/m/05zkcn5
/m/01qbl	/music/performance_role/regular_performances./music/group_membership/role	/m/028tv0
/m/02_t2t	/people/person/profession	/m/016z4k
/m/01pw2f1	/base/popstra/celebrity/friendship./base/popstra/friendship/participant	/m/029q_y
/m/0g9z_32	/film/film/written_by	/m/0gls4q_
/m/0168nq	/business/business_operation/assets./measurement_unit/dated_money_value/currency	/m/09nqf
/m/01p3ty	/film/film/production_companies	/m/099ks0
/m/08s6mr	/film/film/genre	/m/06qln
/m/0prjs	/award/award_nominee/award_nominations./award/award_nomination/nominated_for	/m/02q_x_l
/m/02r8hh_	/film/film/release_date_s./film/film_regional_release_date/film_release_region	/m/0h7x
/m/02qgqt	/award/award_nominee/award_nominations./award/award_nomination/award_nominee	/m/04bdxl
/m/02y_2y	/film/actor/film./film/performance/film	/m/07j8r
/m/0cj2w	/people/person/spouse_s./people/marriage/type_of_union	/m/04ztj
/m/0mdqp	/award/award_nominee/award_nominations./award/award_nomination/award_nominee	/m/039bp
/m/02kxx1	/education/educational_institution/students_graduates./education/education/student	/m/0djc3s
/m/02xtxw	/film/film/language	/m/02h40lc
/m/0170th	/film/film/genre	/m/07s9rl0
/m/07q1v4	/award/award_nominee/award_nominations./award/award_nomination/award	/m/025m8y
/m/02kcz	/location/statistical_region/gni_per_capita_in_ppp_dollars./measurement_unit/dated_money_value/currency	/m/09nqf
/m/0x67	/people/ethnicity/people	/m/03q2t9
/m/01_s9q	/organization/endowed_organization/endowment./measurement_unit/dated_money_value/currency	/m/09nqf
/m/0dnkmq	/film/film/executive_produced_by	/m/079vf
/m/01c5d5	/people/deceased_person/place_of_death	/m/030qb3t
/m/01vksx	/film/film/release_date_s./film/film_regional_release_date/film_release_region	/m/03gj2
/m/05_5rjx	/film/film/other_crew./film/film_crew_gig/film_crew_role	/m/0dxtw
/m/016tt2	/film/film_distributor/films_distributed./film/film_film_distributor_relationship/film	/m/0bj25
/m/0ccd3x	/film/film/estimated_budget./measurement_unit/dated_money_value/currency	/m/09nqf
/m/03_wj_	/award/award_winner/awards_won./award/award_honor/award_winner	/m/06bzwt
/m/02lxj_	/award/award_nominee/award_nominations./award/award_nomination/award_nominee	/m/03q5dr
/m/054ky1	/award/award_category/winners./award/award_honor/award_winner	/m/04sry
/m/0gh65c5	/film/film/other_crew./film/film_crew_gig/film_crew_role	/m/0dxtw
/m/0d4fqn	/award/award_nominee/award_nominations./award/award_nomination/award_nominee	/m/03xp8d5
/m/01gg59	/award/award_nominee/award_nominations./award/award_nomination/award	/m/026mmy
/m/02sj1x	/award/award_nominee/award_nominations./award/award_nomination/nominated_for	/m/03bdkd
/m/0dmtp	/base/schemastaging/organization_extra/phone_number./base/schemastaging/phone_sandbox/contact_category	/m/02zdwq
/m/0cl0bk	/award/award_nominee/award_nominations./award/award_nomination/award_nominee	/m/0cj36c
/m/02w_6xj	/award/award_category/winners./award/award_honor/award_winner	/m/03xp8d5
/m/045zr	/people/person/profession	/m/0n1h
/m/01x0sy	/people/person/gender	/m/05zppz
/m/023g6w	/film/film/language	/m/02h40lc
/m/03rhqg	/music/record_label/artist	/m/0k1bs
/m/03kq98	/award/award_winning_work/awards_won./award/award_honor/award	/m/0bp_b2
/m/06h7l7	/award/award_nominee/award_nominations./award/award_nomination/nominated_for	/m/0cwrr
/m/030znt	/award/award_winner/awards_won./award/award_honor/award_winner	/m/05lb87
/m/0tc7	/award/award_nominee/award_nominations./award/award_nomination/award_nominee	/m/0253b6
/m/01hw5kk	/film/film/genre	/m/04xvh5
/m/014knw	/film/film/release_date_s./film/film_regional_release_date/film_release_region	/m/0f8l9c
/m/050rj	/music/performance_role/track_performances./music/track_contribution/role	/m/0mkg
/m/02y9ln	/sports/pro_athlete/teams./sports/sports_team_roster/team	/m/0425gc
/m/0bynt	/olympics/olympic_sport/athletes./olympics/olympic_athlete_affiliation/country	/m/02k1b
/m/098sx	/people/person/profession	/m/01l5t6
/m/02ccqg	/organization/organization/headquarters./location/mailing_address/citytown	/m/0fdpd
/m/0241y7	/film/film/other_crew./film/film_crew_gig/film_crew_role	/m/01pvkk
/m/01vvb4m	/celebrities/celebrity/sexual_relationships./celebrities/romantic_relationship/celebrity	/m/0kjrx
/m/02hp6p	/business/business_operation/revenue./measurement_unit/dated_money_value/currency	/m/09nqf
/m/01ps2h8	/award/award_winner/awards_won./award/award_honor/award_winner	/m/015t56
/m/0g2c8	/organization/non_profit_organization/registered_with./organization/non_profit_registration/registering_agency	/m/03z19
/m/0bynt	/olympics/olympic_sport/athletes./olympics/olympic_athlete_affiliation/country	/m/0160w
/m/02p2zq	/award/award_winner/awards_won./award/award_honor/award_winner	/m/014kyy
/m/0by17xn	/film/film/release_date_s./film/film_regional_release_date/film_release_region	/m/047yc
/m/0156ts	/base/aareas/schema/administrative_area/administrative_parent	/m/023sm8
/m/0l14md	/music/performance_role/regular_performances./music/group_membership/role	/m/0xzly
/m/0170xl	/film/film/estimated_budget./measurement_unit/dated_money_value/currency	/m/09nqf
/m/01n7q	/location/location/contains	/m/0r066
/m/03rk0	/location/location/contains	/m/09c6w
/m/01z88t	/olympics/olympic_participating_country/athletes./olympics/olympic_athlete_affiliation/olympics	/m/06sks6
/m/0k9j_	/award/award_nominee/award_nominations./award/award_nomination/nominated_for	/m/0k419
/m/0d8cr0	/people/person/gender	/m/05zppz
/m/0c_j9x	/film/film/cinematography	/m/06qn87
/m/02x4x18	/award/award_category/winners./award/award_honor/award_winner	/m/019f2f
/m/0309lm	/film/actor/film./film/performance/film	/m/0bv8h2
/m/02bqvs	/film/film/estimated_budget./measurement_unit/dated_money_value/currency	/m/09nqf
/m/0154qm	/award/award_nominee/award_nominations./award/award_nomination/award	/m/0fq9zcx
/m/0h1cdwq	/film/film/release_date_s./film/film_regional_release_date/film_release_region	/m/0f8l9c
/m/01vdm0	/music/performance_role/track_performances./music/track_contribution/role	/m/01qbl
/m/0ngg	/people/person/place_of_birth	/m/06c62
/m/01qscs	/award/award_winner/awards_won./award/award_honor/award_winner	/m/0crvfq
/m/09lhln	/soccer/football_player/current_team./sports/sports_team_roster/team	/m/02b10w
/m/017z88	/education/university/domestic_tuition./measurement_unit/dated_money_value/currency	/m/09nqf
/m/02rjv2w	/film/film/genre	/m/07s9rl0
/m/05m_8	/organization/organization/headquarters./location/mailing_address/state_province_region	/m/01n7q
/m/07g9f	/award/award_winning_work/awards_won./award/award_honor/award_winner	/m/0cjdk
/m/03j6_5	/soccer/football_team/current_roster./soccer/football_roster_position/position	/m/0dgrmp
/m/0nv6n	/location/location/adjoin_s./location/adjoining_relationship/adjoins	/m/0nvg4
/m/03m79j_	/award/award_category/winners./award/award_honor/award_winner	/m/01qmy04
/m/016tt2	/film/film_distributor/films_distributed./film/film_film_distributor_relationship/film	/m/048vhl
/m/017xm3	/award/award_nominee/award_nominations./award/award_nomination/award	/m/026mfs
/m/029cpw	/film/actor/film./film/performance/film	/m/0k54q
/m/0fthdk	/people/person/places_lived./people/place_lived/location	/m/030qb3t
/m/013yq	/location/location/time_zones	/m/02hcv8
/m/01ffx4	/film/film/estimated_budget./measurement_unit/dated_money_value/currency	/m/09nqf
/m/02kxbwx	/award/award_nominee/award_nominations./award/award_nomination/award	/m/02qyntr
/m/0755wz	/award/award_nominee/award_nominations./award/award_nomination/award_nominee	/m/01z7_f
/m/01gst_	/government/legislative_session/members./government/government_position_held/legislative_sessions	/m/043djx
/m/04cbbz	/film/film/language	/m/02h40lc
/m/07s9rl0	/media_common/netflix_genre/titles	/m/047d21r
/m/04dn09n	/award/award_category/winners./award/award_honor/award_winner	/m/05m883
/m/01p726	/location/location/contains	/m/01k2wn
/m/01gqg3	/military/military_conflict/combatants./military/military_combatant_group/combatants	/m/0d0vqn
/m/0pd64	/film/film/language	/m/02h40lc
/m/0ftf0f	/sports/sports_team/roster./american_football/football_historical_roster_position/position_s	/m/04nfpk
/m/025hzx	/people/person/gender	/m/05zppz
/m/039bpc	/people/person/spouse_s./people/marriage/type_of_union	/m/04ztj
/m/0d7wh	/people/ethnicity/people	/m/020_4z
/m/05_5_22	/film/film/other_crew./film/film_crew_gig/film_crew_role	/m/09vw2b7
/m/0fq7dv_	/film/film/release_date_s./film/film_regional_release_date/film_release_region	/m/06npd
/m/01p4vl	/base/popstra/celebrity/canoodled./base/popstra/canoodled/participant	/m/019pm_
/m/01hjy5	/business/business_operation/revenue./measurement_unit/dated_money_value/currency	/m/09nqf
/m/09bw4_	/film/film/estimated_budget./measurement_unit/dated_money_value/currency	/m/09nqf
/m/02qyntr	/award/award_category/nominees./award/award_nomination/nominated_for	/m/016z7s
/m/0f0kz	/award/award_nominee/award_nominations./award/award_nomination/award_nominee	/m/0154qm
/m/0l76z	/tv/tv_program/genre	/m/02l7c8
/m/02v3yy	/award/award_nominee/award_nominations./award/award_nomination/award	/m/054ks3
/m/02knxx	/people/cause_of_death/people	/m/0bw87
/m/017b2p	/people/person/spouse_s./people/marriage/type_of_union	/m/04ztj
/m/0459z	/people/deceased_person/place_of_death	/m/0fhp9
/m/077q8x	/film/film/estimated_budget./measurement_unit/dated_money_value/currency	/m/09nqf
/m/0gkd1	/music/performance_role/regular_performances./music/group_membership/role	/m/0l14md
/m/016z7s	/film/film/genre	/m/04xvh5
/m/0cqhk0	/award/award_category/winners./award/award_honor/award_winner	/m/0cj36c
/m/01hxs4	/base/popstra/celebrity/dated./base/popstra/dated/participant	/m/03c6v3
/m/0h1nt	/award/award_nominee/award_nominations./award/award_nomination/award	/m/0bfvw2
/m/01qscs	/award/award_nominee/award_nominations./award/award_nomination/award_nominee	/m/02p65p
/m/0dc_ms	/film/film/language	/m/02h40lc
/m/0l14qv	/music/instrument/instrumentalists	/m/05mt6w
/m/049xgc	/award/award_winning_work/awards_won./award/award_honor/award_winner	/m/04sry
/m/0gr4k	/award/award_category/nominees./award/award_nomination/nominated_for	/m/0gcrg
/m/01gssm	/government/legislative_session/members./government/government_position_held/legislative_sessions	/m/01gsrl
/m/03fw4y	/award/award_nominee/award_nominations./award/award_nomination/award	/m/0b6k___
/m/0xnvg	/people/ethnicity/people	/m/04yywz
/m/09sdmz	/award/award_category/winners./award/award_honor/award_winner	/m/014v6f
/m/0h7pj	/award/award_nominee/award_nominations./award/award_nomination/award	/m/02x8n1n
/m/081k8	/media_common/netflix_genre/titles	/m/0prhz
/m/04f9r2	/people/person/gender	/m/05zppz
/m/0ggh3	/location/capital_of_administrative_division/capital_of./location/administrative_division_capital_relationship/administrative_division	/m/0jhz_
/m/0bcndz	/award/award_winning_work/awards_won./award/award_honor/award_winner	/m/0579tg2
/m/02jxkw	/award/award_winner/awards_won./award/award_honor/award_winner	/m/02r4qs
/m/06szd3	/award/hall_of_fame/inductees./award/hall_of_fame_induction/inductee	/m/01t9qj_
/m/0by17xn	/film/film/release_date_s./film/film_regional_release_date/film_release_region	/m/0d0vqn
/m/040z9	/people/person/gender	/m/05zppz
/m/0qmhk	/film/film/genre	/m/02n4kr
/m/07j8r	/film/film/release_date_s./film/film_regional_release_date/film_release_region	/m/0chghy
/m/0488g9	/tv/tv_producer/programs_produced./tv/tv_producer_term/program	/m/063zky
/m/04lqvly	/film/film/genre	/m/07s9rl0
/m/0qb0j	/location/location/adjoin_s./location/adjoining_relationship/adjoins	/m/0jk_8
/m/09lhln	/sports/pro_athlete/teams./sports/sports_team_roster/team	/m/02b0zt
/m/04rrx	/location/statistical_region/religions./location/religion_percentage/religion	/m/0631_
/m/07mqps	/people/ethnicity/people	/m/01r4bps
/m/0gr4k	/award/award_category/nominees./award/award_nomination/nominated_for	/m/05c46y6
/m/057xkj_	/american_football/football_team/current_roster./sports/sports_team_roster/position	/m/05zm34
/m/02h7qr	/education/educational_institution/colors	/m/019sc
/m/0y3_8	/music/genre/artists	/m/01fchy
/m/04g5k	/location/location/adjoin_s./location/adjoining_relationship/adjoins	/m/04gzd
/m/0fphgb	/film/film/release_date_s./film/film_regional_release_date/film_release_region	/m/05qhw
/m/0fby2t	/people/person/profession	/m/0dxtg
/m/0cqhk0	/award/award_category/winners./award/award_honor/award_winner	/m/01w0yrc
/m/01hjy5	/business/business_operation/operating_income./measurement_unit/dated_money_value/currency	/m/09nqf
/m/01vg0s	/education/educational_institution/students_graduates./education/education/major_field_of_study	/m/06mnr
/m/0by17xn	/film/film/release_date_s./film/film_regional_release_date/film_release_region	/m/04gzd
/m/07tgn	/education/educational_institution/students_graduates./education/education/major_field_of_study	/m/01lhy
/m/01hkg9	/people/person/profession	/m/0np9r
/m/044prt	/people/person/spouse_s./people/marriage/type_of_union	/m/04ztj
/m/06cm5	/award/award_winning_work/awards_won./award/award_honor/award	/m/09cm54
/m/01w3v	/education/educational_institution/students_graduates./education/education/major_field_of_study	/m/0g26h
/m/0l786	/award/award_nominee/award_nominations./award/award_nomination/award	/m/0bdwqv
/m/02hft3	/business/business_operation/assets./measurement_unit/dated_money_value/currency	/m/09nqf
/m/0fhp9	/base/aareas/schema/administrative_area/administrative_parent	/m/0h7x
/m/06bzwt	/award/award_nominee/award_nominations./award/award_nomination/nominated_for	/m/03s9kp
/m/03818y	/business/business_operation/revenue./measurement_unit/dated_money_value/currency	/m/09nqf
/m/02sgy	/music/performance_role/track_performances./music/track_contribution/role	/m/0319l
/m/04bdxl	/award/award_winner/awards_won./award/award_honor/award_winner	/m/05k2s_
/m/06sfk6	/film/film/other_crew./film/film_crew_gig/film_crew_role	/m/0dxtw
/m/0hx4y	/film/film/release_date_s./film/film_regional_release_date/film_release_region	/m/05b4w
/m/027hnjh	/award/award_nominee/award_nominations./award/award_nomination/nominated_for	/m/07g9f
/m/0d1tm	/olympics/olympic_sport/athletes./olympics/olympic_athlete_affiliation/olympics	/m/0jhn7
/m/0l14j_	/music/performance_role/track_performances./music/track_contribution/role	/m/02g9p4
/m/01l_yg	/film/actor/film./film/performance/film	/m/01f7kl
/m/0bdwqv	/award/award_category/nominees./award/award_nomination/nominated_for	/m/05jyb2
/m/05sq84	/award/award_nominee/award_nominations./award/award_nomination/award	/m/0789_m
/m/05zm34	/sports/sports_position/players./sports/sports_team_roster/team	/m/05g3b
/m/0k269	/award/award_nominee/award_nominations./award/award_nomination/award	/m/09sb52
/m/05b4w	/olympics/olympic_participating_country/medals_won./olympics/olympic_medal_honor/olympics	/m/01f1jy
/m/098sx	/people/person/gender	/m/05zppz
/m/01y_px	/award/award_nominee/award_nominations./award/award_nomination/award	/m/09qvc0
/m/04jkpgv	/film/film/country	/m/05qhw
/m/0b_dy	/award/award_nominee/award_nominations./award/award_nomination/nominated_for	/m/027pfg
/m/014mlp	/education/educational_degree/people_with_this_degree./education/education/institution	/m/012mzw
/m/02jkkv	/film/film/language	/m/02h40lc
/m/0gtvrv3	/film/film/release_date_s./film/film_regional_release_date/film_release_region	/m/015fr
/m/04ktcgn	/award/award_nominee/award_nominations./award/award_nomination/award_nominee	/m/0b6mgp_
/m/02knnd	/people/person/place_of_birth	/m/0qt85
/m/01v_pj6	/award/award_nominee/award_nominations./award/award_nomination/award	/m/02f72n
/m/0l76z	/award/award_winning_work/awards_won./award/award_honor/award_winner	/m/05m9f9
/m/096lf_	/people/person/places_lived./people/place_lived/location	/m/0f2r6
/m/09sdmz	/award/award_category/nominees./award/award_nomination/nominated_for	/m/047myg9
/m/0d07s	/organization/organization/headquarters./location/mailing_address/state_province_region	/m/01w0v
/m/0gqz2	/award/award_category/winners./award/award_honor/award_winner	/m/01vttb9
/m/0bq0p9	/military/military_combatant/military_conflicts./military/military_combatant_group/combatants	/m/0f8l9c
/m/07fvf1	/award/award_nominee/award_nominations./award/award_nomination/award_nominee	/m/03xp8d5
/m/04b_jc	/award/award_winning_work/awards_won./award/award_honor/award_winner	/m/06dn58
/m/0dmn0x	/film/film/film_format	/m/0cj16
/m/02qvhbb	/people/person/languages	/m/02h40lc
/m/02wd48	/people/person/gender	/m/05zppz
/m/0bpm4yw	/film/film/other_crew./film/film_crew_gig/film_crew_role	/m/089fss
/m/02y21l	/music/record_label/artist	/m/01w524f
/m/0473rc	/film/film/other_crew./film/film_crew_gig/crewmember	/m/09pjnd
/m/09gdm7q	/film/film/release_date_s./film/film_regional_release_date/film_release_region	/m/03rk0
/m/0dgrmp	/sports/sports_position/players./sports/sports_team_roster/team	/m/0gd70t
/m/01hjy5	/organization/organization/headquarters./location/mailing_address/citytown	/m/01sn3
/m/0ccck7	/film/film/release_date_s./film/film_regional_release_date/film_release_region	/m/015fr
/m/0dgrmp	/sports/sports_position/players./sports/sports_team_roster/team	/m/087_xx
/m/01t265	/people/person/religion	/m/0c8wxp
/m/01n_g9	/education/educational_institution/students_graduates./education/education/major_field_of_study	/m/02lp1
/m/0bshwmp	/film/film/genre	/m/02l7c8
/m/02s5v5	/award/award_nominee/award_nominations./award/award_nomination/nominated_for	/m/02r858_
/m/09gdh6k	/film/film/language	/m/02h40lc
/m/02f6g5	/film/film/other_crew./film/film_crew_gig/film_crew_role	/m/0ch6mp2
/m/04wg38	/base/popstra/celebrity/dated./base/popstra/dated/participant	/m/016vg8
/m/01nz1q6	/people/person/places_lived./people/place_lived/location	/m/07dfk
/m/072bb1	/award/award_nominee/award_nominations./award/award_nomination/award_nominee	/m/060j8b
/m/03c7twt	/film/film/estimated_budget./measurement_unit/dated_money_value/currency	/m/09nqf
/m/06929s	/film/film/music	/m/01vsxdm
/m/05h43ls	/film/film/genre	/m/07s9rl0
/m/06pj8	/film/director/film	/m/02mmwk
/m/0dzbl	/education/educational_institution/students_graduates./education/education/student	/m/02c4s
/m/054krc	/award/award_category/nominees./award/award_nomination/nominated_for	/m/0gh65c5
/m/0kv238	/film/film/release_date_s./film/film_regional_release_date/film_release_region	/m/04gzd
/m/0171lb	/people/person/spouse_s./people/marriage/type_of_union	/m/04ztj
/m/0k269	/people/person/spouse_s./people/marriage/type_of_union	/m/04ztj
/m/0swbd	/user/jg/default_domain/olympic_games/sports	/m/01z27
/m/023cjg	/film/film/estimated_budget./measurement_unit/dated_money_value/currency	/m/09nqf
/m/05qtj	/travel/travel_destination/climate./travel/travel_destination_monthly_climate/month	/m/04wzr
/m/0xnvg	/people/ethnicity/people	/m/01l9v7n
/m/01gt99	/government/legislative_session/members./government/government_position_held/district_represented	/m/06yxd
/m/02z3zp	/award/award_nominee/award_nominations./award/award_nomination/award_nominee	/m/0b1f49
/m/07jbh	/olympics/olympic_sport/athletes./olympics/olympic_athlete_affiliation/country	/m/0d05w3
/m/0bcndz	/film/film/executive_produced_by	/m/01b9ck
/m/01xvb	/sports/sports_team/roster./american_football/football_historical_roster_position/position_s	/m/0b13yt
/m/027hm_	/people/person/profession	/m/01c72t
/m/0221g_	/education/university/domestic_tuition./measurement_unit/dated_money_value/currency	/m/09nqf
/m/05d6q1	/film/film_distributor/films_distributed./film/film_film_distributor_relationship/film	/m/05z_kps
/m/01h72l	/tv/tv_program/genre	/m/05p553
/m/03qd_	/film/actor/film./film/performance/film	/m/01738w
/m/014mlp	/education/educational_degree/people_with_this_degree./education/education/institution	/m/07xpm
/m/02q5xsx	/award/award_nominee/award_nominations./award/award_nomination/nominated_for	/m/07g9f
/m/0dbxy	/people/ethnicity/people	/m/0127m7
/m/03m49ly	/award/award_nominee/award_nominations./award/award_nomination/award_nominee	/m/095zvfg
/m/03rwng	/film/actor/dubbing_performances./film/dubbing_performance/language	/m/02h40lc
/m/02xbyr	/film/film/release_date_s./film/film_regional_release_date/film_release_region	/m/06c1y
/m/014mlp	/education/educational_degree/people_with_this_degree./education/education/institution	/m/023zl
/m/01wdj_	/education/university/domestic_tuition./measurement_unit/dated_money_value/currency	/m/09nqf
/m/017gl1	/film/film/release_date_s./film/film_regional_release_date/film_release_region	/m/07f1x
/m/01qbl	/music/performance_role/guest_performances./music/recording_contribution/performance_role	/m/0l14md
/m/04p5cr	/award/award_winning_work/awards_won./award/award_honor/award	/m/0cqhb3
/m/06cv1	/people/person/gender	/m/05zppz
/m/024dzn	/award/award_category/winners./award/award_honor/award_winner	/m/02fgp0
/m/02l4pj	/award/award_nominee/award_nominations./award/award_nomination/award_nominee	/m/03zg2x
/m/079hvk	/people/person/gender	/m/05zppz
/m/0hvjr	/soccer/football_team/current_roster./sports/sports_team_roster/position	/m/0dgrmp
/m/05dtwm	/people/person/spouse_s./people/marriage/type_of_union	/m/04ztj
/m/0f4_l	/film/film/release_date_s./film/film_regional_release_date/film_release_region	/m/0f8l9c
/m/01nn79	/business/business_operation/revenue./measurement_unit/dated_money_value/currency	/m/09nqf
/m/0cq86w	/film/film/other_crew./film/film_crew_gig/film_crew_role	/m/01pvkk
/m/0j0pf	/influence/influence_node/influenced_by	/m/01dzz7
/m/05qbckf	/film/film/release_date_s./film/film_regional_release_date/film_release_region	/m/04hqz
/m/012j5h	/people/deceased_person/place_of_death	/m/030qb3t
/m/02ts3h	/people/person/languages	/m/02h40lc
/m/0d2by	/people/ethnicity/people	/m/07ftc0
/m/02dwj	/film/film/genre	/m/05p553
/m/01vv6_6	/people/person/gender	/m/05zppz
/m/014_lq	/influence/influence_node/influenced_by	/m/04rcr
/m/019vsw	/education/educational_institution/students_graduates./education/education/student	/m/0136g9
/m/02lgfh	/award/award_nominee/award_nominations./award/award_nomination/award_nominee	/m/02lg3y
/m/0147dk	/award/award_nominee/award_nominations./award/award_nomination/award	/m/03t5b6
/m/0flw6	/people/person/spouse_s./people/marriage/type_of_union	/m/04ztj
/m/023qfd	/people/person/profession	/m/0dxtg
/m/0m2rv	/location/location/time_zones	/m/02hcv8
/m/052hl	/award/award_nominee/award_nominations./award/award_nomination/nominated_for	/m/07tw_b
/m/077rj	/people/person/profession	/m/01c72t
/m/0glb5	/base/aareas/schema/administrative_area/administrative_parent	/m/0f8l9c
/m/05fnl9	/award/award_nominee/award_nominations./award/award_nomination/award	/m/0cqhb3
/m/03s6l2	/film/film/genre	/m/02l7c8
/m/014zz1	/music/performance_role/track_performances./music/track_contribution/role	/m/07brj
/m/0807ml	/award/award_nominee/award_nominations./award/award_nomination/award_nominee	/m/02m92h
/m/0557q	/music/genre/artists	/m/0164y7
/m/016s0m	/music/artist/track_contributions./music/track_contribution/role	/m/05842k
/m/0x67	/people/ethnicity/people	/m/059_gf
/m/02q3bb	/award/award_winner/awards_won./award/award_honor/award_winner	/m/0311wg
/m/01rr31	/organization/endowed_organization/endowment./measurement_unit/dated_money_value/currency	/m/09nqf
/m/0l14md	/music/performance_role/track_performances./music/track_contribution/role	/m/02pprs
/m/09xwz	/organization/non_profit_organization/registered_with./organization/non_profit_registration/registering_agency	/m/03z19
/m/0x67	/people/ethnicity/people	/m/01tpl1p
/m/057wlm	/education/university/local_tuition./measurement_unit/dated_money_value/currency	/m/09nqf
/m/0315q3	/award/award_nominee/award_nominations./award/award_nomination/award_nominee	/m/05mkhs
/m/0jsqk	/award/award_winning_work/awards_won./award/award_honor/award	/m/0gs96
/m/030_1m	/award/award_nominee/award_nominations./award/award_nomination/award_nominee	/m/08hp53
/m/01lhy	/education/field_of_study/students_majoring./education/education/student	/m/03j2gxx
/m/04sry	/film/director/film	/m/04vr_f
/m/08swgx	/award/award_nominee/award_nominations./award/award_nomination/award_nominee	/m/01d1st
/m/0gkr9q	/award/award_category/nominees./award/award_nomination/nominated_for	/m/0dsx3f
/m/018grr	/people/person/gender	/m/05zppz
/m/01h1b	/award/award_nominee/award_nominations./award/award_nomination/award_nominee	/m/06cgy
/m/07x4qr	/film/film/other_crew./film/film_crew_gig/film_crew_role	/m/089fss
/m/07s9rl0	/media_common/netflix_genre/titles	/m/05zwrg0
/m/01ycfv	/music/artist/track_contributions./music/track_contribution/role	/m/01vdm0
/m/09n5b9	/government/government_office_category/officeholders./government/government_position_held/jurisdiction_of_office	/m/0824r
/m/019pkm	/award/award_winner/awards_won./award/award_honor/award_winner	/m/078jt5
/m/03ts0c	/people/ethnicity/people	/m/01rgr
/m/017_pb	/people/person/profession	/m/0xzm
/m/0bs1g5r	/award/award_nominee/award_nominations./award/award_nomination/award	/m/01c92g
/m/02l3_5	/film/actor/dubbing_performances./film/dubbing_performance/language	/m/02h40lc
/m/0dzst	/education/university/local_tuition./measurement_unit/dated_money_value/currency	/m/09nqf
/m/0vrmb	/location/location/time_zones	/m/02hcv8
/m/0d87hc	/film/film/other_crew./film/film_crew_gig/film_crew_role	/m/01pvkk
/m/0bs0bh	/award/award_category/winners./award/award_honor/award_winner	/m/014kg4
/m/0b4lkx	/award/award_winning_work/awards_won./award/award_honor/award_winner	/m/01tcf7
/m/01kff7	/film/film/other_crew./film/film_crew_gig/crewmember	/m/027rwmr
/m/01679d	/music/performance_role/track_performances./music/track_contribution/role	/m/0l14md
/m/0cq7tx	/film/film/production_companies	/m/016tt2
/m/02f_k_	/base/schemastaging/person_extra/net_worth./measurement_unit/dated_money_value/currency	/m/09nqf
/m/01vs_v8	/award/award_nominee/award_nominations./award/award_nomination/award_nominee	/m/05vzw3
/m/0457w0	/soccer/football_player/current_team./sports/sports_team_roster/team	/m/01zhs3
/m/0g48m4	/people/ethnicity/people	/m/0dzc16
/m/013q07	/award/award_winning_work/awards_won./award/award_honor/award	/m/05zvj3m
/m/08nvyr	/film/film/other_crew./film/film_crew_gig/film_crew_role	/m/0ch6mp2
/m/019f2f	/award/award_nominee/award_nominations./award/award_nomination/award	/m/09qwmm
/m/01y665	/award/award_nominee/award_nominations./award/award_nomination/award	/m/08_vwq
/m/0djc3s	/people/person/nationality	/m/03rk0
/m/0163t3	/people/person/spouse_s./people/marriage/type_of_union	/m/04ztj
/m/0ccck7	/film/film/language	/m/02h40lc
/m/064177	/people/person/profession	/m/0dxtg
/m/07lp1	/people/person/gender	/m/05zppz
/m/04dn09n	/award/award_category/nominees./award/award_nomination/nominated_for	/m/011yhm
/m/03xq0f	/film/film_distributor/films_distributed./film/film_film_distributor_relationship/film	/m/07l50_1
/m/02glc4	/government/legislative_session/members./government/government_position_held/legislative_sessions	/m/02bqm0
/m/02lf1j	/film/actor/film./film/performance/film	/m/0pvms
/m/03vgp7	/award/award_nominee/award_nominations./award/award_nomination/award_nominee	/m/0b_dy
/m/0f8l9c	/olympics/olympic_participating_country/medals_won./olympics/olympic_medal_honor/olympics	/m/06sks6
/m/01hx2t	/education/educational_institution/students_graduates./education/education/major_field_of_study	/m/0g26h
/m/037cr1	/film/film/language	/m/02h40lc
/m/0dgrmp	/sports/sports_position/players./sports/sports_team_roster/team	/m/02b0zt
/m/03y_46	/award/award_nominee/award_nominations./award/award_nomination/award_nominee	/m/01tspc6
/m/0gx_st	/award/award_ceremony/awards_presented./award/award_honor/award_winner	/m/048wrb
/m/02825nf	/film/film/release_date_s./film/film_regional_release_date/film_release_region	/m/04gzd
/m/03nnm4t	/award/award_ceremony/awards_presented./award/award_honor/honored_for	/m/0h95b81
/m/04v09	/location/location/adjoin_s./location/adjoining_relationship/adjoins	/m/0h3y
/m/016lh0	/base/schemastaging/person_extra/net_worth./measurement_unit/dated_money_value/currency	/m/09nqf
/m/0gj9qxr	/film/film/release_date_s./film/film_regional_release_date/film_release_region	/m/03gj2
/m/01wj18h	/people/person/religion	/m/0c8wxp
/m/02_xgp2	/education/educational_degree/people_with_this_degree./education/education/institution	/m/0dplh
/m/0408np	/award/award_nominee/award_nominations./award/award_nomination/award_nominee	/m/02qgqt
/m/042xrr	/award/award_nominee/award_nominations./award/award_nomination/award_nominee	/m/0169dl
/m/0p_pd	/award/award_nominee/award_nominations./award/award_nomination/award	/m/0c422z4
/m/0gr4k	/award/award_category/winners./award/award_honor/award_winner	/m/02kxbwx
/m/0gkr9q	/award/award_category/winners./award/award_honor/ceremony	/m/0hn821n
/m/02pzz3p	/award/award_category/nominees./award/award_nomination/nominated_for	/m/0phrl
/m/0fj52s	/food/food/nutrients./food/nutrition_fact/nutrient	/m/01n78x
/m/014mlp	/education/educational_degree/people_with_this_degree./education/education/institution	/m/01swxv
/m/044bn	/people/person/profession	/m/0dxtg
/m/02zr0z	/organization/non_profit_organization/registered_with./organization/non_profit_registration/registering_agency	/m/03z19
/m/05pzdk	/award/award_nominee/award_nominations./award/award_nomination/award_nominee	/m/06msq2
/m/011yxg	/award/award_winning_work/awards_won./award/award_honor/award	/m/054krc
/m/026c0p	/people/person/profession	/m/0np9r
/m/048gd_	/soccer/football_team/current_roster./sports/sports_team_roster/position	/m/0dgrmp
/m/084l5	/sports/sports_team/roster./american_football/football_roster_position/position	/m/04nfpk
/m/018swb	/film/actor/film./film/performance/film	/m/019vhk
/m/0mkg	/music/instrument/instrumentalists	/m/01k23t
/m/03bzyn4	/film/film/production_companies	/m/03jvmp
/m/01rxw	/location/location/adjoin_s./location/adjoining_relationship/adjoins	/m/01nyl
/m/07hwkr	/people/ethnicity/people	/m/0hsn_
/m/04t36	/media_common/netflix_genre/titles	/m/0fgrm
/m/0315q3	/award/award_nominee/award_nominations./award/award_nomination/award	/m/05zvj3m
/m/06crng	/award/award_nominee/award_nominations./award/award_nomination/nominated_for	/m/05_5_22
/m/0661ql3	/film/film/film_format	/m/017fx5
/m/02825kb	/film/film/featured_film_locations	/m/03gh4
/m/01xqw	/music/performance_role/regular_performances./music/group_membership/role	/m/05kms
/m/0myk8	/music/performance_role/track_performances./music/track_contribution/role	/m/02sgy
/m/019f2f	/award/award_nominee/award_nominations./award/award_nomination/award_nominee	/m/086sj
/m/06x4l_	/people/person/gender	/m/05zppz
/m/065jlv	/award/award_nominee/award_nominations./award/award_nomination/award_nominee	/m/02l4pj
/m/079ws	/people/person/gender	/m/05zppz
/m/0tz01	/location/location/time_zones	/m/02hcv8
[truncated: 194 more rows]
