# Supplementary material
Source: ML conference proceedings conference paper supplement (https://proceedings.neurips.cc/paper_files/paper/2021/hash/0fd600c953cde8121262e322ef09f70e-Abstract.html)
Supplement: Supplementary file 1 [file 0fd600c953cde8121262e322ef09f70e-Supplemental.zip › Supplementary_Material_Paper_8745/data/GraIL-BM_fb237_v4/test/test-fact.txt]

/m/03zz8b	/award/award_nominee/award_nominations./award/award_nomination/award	/m/05zrvfd
/m/01zc2w	/education/field_of_study/students_majoring./education/education/major_field_of_study	/m/0jjw
/m/077yk0	/award/award_nominee/award_nominations./award/award_nomination/award_nominee	/m/022q4l9
/m/095z4q	/film/film/production_companies	/m/06rq1k
/m/05pd94v	/award/award_ceremony/awards_presented./award/award_honor/award_winner	/m/03qmj9
/m/0353tm	/film/film/release_date_s./film/film_regional_release_date/film_release_distribution_medium	/m/029j_
/m/01jzyf	/award/award_winning_work/awards_won./award/award_honor/award_winner	/m/01fh9
/m/01mkq	/education/field_of_study/students_majoring./education/education/major_field_of_study	/m/05qfh
/m/0dd6bf	/film/film/genre	/m/01hmnh
/m/0ds11z	/award/award_winning_work/awards_won./award/award_honor/award	/m/0gq_v
/m/01yhm	/baseball/baseball_team/team_stats./baseball/baseball_team_stats/season	/m/04110b0
/m/026z9	/music/genre/artists	/m/09889g
/m/01qgry	/music/artist/track_contributions./music/track_contribution/role	/m/07c6l
/m/0243cq	/film/film/release_date_s./film/film_regional_release_date/film_release_distribution_medium	/m/029j_
/m/020h2v	/business/business_operation/industry	/m/02vxn
/m/01cwcr	/film/actor/film./film/performance/film	/m/02qcr
/m/01mv_n	/people/person/profession	/m/018gz8
/m/027m67	/film/film/language	/m/07c9s
/m/09y20	/award/award_nominee/award_nominations./award/award_nomination/award_nominee	/m/0dvld
/m/0f4dx2	/award/award_winner/awards_won./award/award_honor/award_winner	/m/03n_7k
/m/01pv91	/award/award_winning_work/awards_won./award/award_honor/award	/m/02x1z2s
/m/060bp	/government/government_office_category/officeholders./government/government_position_held/jurisdiction_of_office	/m/0164v
/m/0n6kf	/influence/influence_node/influenced_by	/m/084w8
/m/016ywr	/film/actor/film./film/performance/film	/m/0bbm7r
/m/04mkft	/organization/organization/place_founded	/m/0r00l
/m/06rqw	/music/genre/artists	/m/0frsw
/m/0dln8jk	/film/film/genre	/m/011ys5
/m/051wwp	/people/person/place_of_birth	/m/01_d4
/m/02bg55	/film/film/release_date_s./film/film_regional_release_date/film_release_region	/m/059j2
/m/0d810y	/award/award_winner/awards_won./award/award_honor/award_winner	/m/044lyq
/m/0pd57	/film/film/genre	/m/01drsx
/m/05bt6j	/music/genre/artists	/m/01q99h
/m/01x2tm8	/people/person/profession	/m/01d_h8
/m/0cx6f	/music/genre/artists	/m/0f6lx
/m/0cqgl9	/award/award_category/winners./award/award_honor/ceremony	/m/092c5f
/m/025p38	/film/actor/film./film/performance/film	/m/0f42nz
/m/07gbf	/tv/tv_program/regular_cast./tv/regular_tv_appearance/actor	/m/01dbgw
/m/09j028	/sports/pro_athlete/teams./sports/sports_team_roster/team	/m/0xbm
/m/01_d4	/travel/travel_destination/climate./travel/travel_destination_monthly_climate/month	/m/04w_7
/m/0dq_5	/organization/role/leaders./organization/leadership/organization	/m/03mnk
/m/05148p4	/music/performance_role/regular_performances./music/group_membership/group	/m/0163m1
/m/0194d	/olympics/olympic_sport/athletes./olympics/olympic_athlete_affiliation/country	/m/06nnj
/m/06rny	/american_football/football_team/current_roster./sports/sports_team_roster/position	/m/01r3hr
/m/064t9	/music/genre/artists	/m/016vn3
/m/03t22m	/music/performance_role/regular_performances./music/group_membership/role	/m/05r5c
/m/02sp_v	/award/award_category/winners./award/award_honor/award_winner	/m/07h76
/m/03902	/travel/travel_destination/climate./travel/travel_destination_monthly_climate/month	/m/0ll3
/m/01tx9m	/organization/organization/headquarters./location/mailing_address/state_province_region	/m/07b_l
/m/0c0nhgv	/film/film/release_date_s./film/film_regional_release_date/film_release_region	/m/03h64
/m/01zc2w	/education/field_of_study/students_majoring./education/education/student	/m/05gml8
/m/0lwyk	/education/educational_institution/students_graduates./education/education/major_field_of_study	/m/05qfh
/m/0b1hw	/award/award_nominee/award_nominations./award/award_nomination/award	/m/02x4wb
/m/07g1sm	/film/film/genre	/m/060__y
/m/0bkq7	/film/film/film_art_direction_by	/m/05v1sb
/m/07147	/sports/professional_sports_team/draft_picks./sports/sports_league_draft_pick/school	/m/02zd460
/m/06by7	/music/genre/artists	/m/0zjpz
/m/016732	/award/award_nominee/award_nominations./award/award_nomination/award_nominee	/m/03bxwtd
/m/02qt02v	/award/award_category/winners./award/award_honor/award_winner	/m/0l15n
/m/05b_gq	/film/film/release_date_s./film/film_regional_release_date/film_release_distribution_medium	/m/029j_
/m/01hmnh	/media_common/netflix_genre/titles	/m/02vqhv0
/m/03qbnj	/award/award_category/winners./award/award_honor/award_winner	/m/0k7pf
/m/05dss7	/film/film/release_date_s./film/film_regional_release_date/film_release_region	/m/0k6nt
/m/0l6px	/award/award_nominee/award_nominations./award/award_nomination/award	/m/0cqh6z
/m/0fbtbt	/award/award_category/winners./award/award_honor/award_winner	/m/04gnbv1
/m/015n8	/influence/influence_node/influenced_by	/m/030dr
/m/04xrx	/award/award_nominee/award_nominations./award/award_nomination/award	/m/01c427
/m/05rx__	/influence/influence_node/influenced_by	/m/02fn5
/m/06s1qy	/award/award_nominee/award_nominations./award/award_nomination/nominated_for	/m/0yx_w
/m/0gywn	/music/genre/artists	/m/012z8_
/m/036qs_	/award/award_nominee/award_nominations./award/award_nomination/award	/m/02x4wr9
/m/01xrlm	/education/university/international_tuition./measurement_unit/dated_money_value/currency	/m/01nv4h
/m/064t9	/music/genre/artists	/m/013423
/m/0c6qh	/base/popstra/celebrity/friendship./base/popstra/friendship/participant	/m/014zcr
/m/0c4f4	/award/award_nominee/award_nominations./award/award_nomination/award	/m/0cjyzs
/m/0f830f	/film/actor/film./film/performance/film	/m/05k2xy
/m/0347xl	/award/award_nominee/award_nominations./award/award_nomination/award_nominee	/m/0c3p7
/m/01438g	/award/award_winner/awards_won./award/award_honor/award_winner	/m/02__7n
/m/01qnfc	/people/person/profession	/m/0dgd_
/m/0cqgl9	/award/award_category/nominees./award/award_nomination/nominated_for	/m/02rlj20
/m/07jjt	/olympics/olympic_sport/athletes./olympics/olympic_athlete_affiliation/country	/m/09pmkv
/m/08t7nz	/award/award_nominee/award_nominations./award/award_nomination/nominated_for	/m/04t6fk
/m/0gjcrrw	/film/film/release_date_s./film/film_regional_release_date/film_release_region	/m/0k6nt
/m/034r25	/film/film/production_companies	/m/020h2v
/m/01438g	/award/award_nominee/award_nominations./award/award_nomination/award_nominee	/m/02__7n
/m/07s7gk6	/music/genre/parent_genre	/m/06by7
/m/05r5c	/music/instrument/instrumentalists	/m/0ffgh
/m/0jhd	/location/location/adjoin_s./location/adjoining_relationship/adjoins	/m/0d0kn
/m/06s6hs	/award/award_nominee/award_nominations./award/award_nomination/award_nominee	/m/034x61
/m/01l47f5	/award/award_winner/awards_won./award/award_honor/award_winner	/m/016sp_
/m/064t9	/music/genre/artists	/m/01q99h
/m/07nnp_	/film/film/produced_by	/m/04fyhv
/m/0fc1_	/location/location/adjoin_s./location/adjoining_relationship/adjoins	/m/0fkhz
/m/078mm1	/film/film/produced_by	/m/03y3dk
/m/022wxh	/award/award_nominee/award_nominations./award/award_nomination/nominated_for	/m/04jwly
/m/01yznp	/people/person/religion	/m/0kpl
/m/0345h	/olympics/olympic_participating_country/medals_won./olympics/olympic_medal_honor/olympics	/m/018qb4
/m/0gt1k	/award/ranked_item/appears_in_ranked_lists./award/ranking/list	/m/05glt
/m/02114t	/award/award_nominee/award_nominations./award/award_nomination/award	/m/0bsjcw
/m/035yn8	/award/award_winning_work/awards_won./award/award_honor/award	/m/0p9sw
/m/05r5c	/music/instrument/instrumentalists	/m/013423
/m/02fwfb	/film/film/release_date_s./film/film_regional_release_date/film_release_distribution_medium	/m/029j_
/m/016zp5	/award/award_nominee/award_nominations./award/award_nomination/award	/m/027cyf7
/m/01q9b9	/people/person/place_of_birth	/m/06wxw
/m/02pp1	/sports/sports_team/colors	/m/083jv
/m/06by7	/music/genre/artists	/m/015cqh
/m/01q7cb_	/base/popstra/celebrity/friendship./base/popstra/friendship/participant	/m/015f7
/m/016h9b	/music/group_member/membership./music/group_membership/role	/m/05r5c
/m/020h2v	/film/film_distributor/films_distributed./film/film_film_distributor_relationship/film	/m/02q87z6
/m/01_xtx	/base/popstra/celebrity/friendship./base/popstra/friendship/participant	/m/0bksh
/m/0gfmc_	/film/film_distributor/films_distributed./film/film_film_distributor_relationship/film	/m/0gjk1d
/m/02x73k6	/award/award_category/nominees./award/award_nomination/nominated_for	/m/07kh6f3
/m/02k8k	/sports/sports_team_location/teams	/m/03zm00
/m/09cxm4	/film/film/release_date_s./film/film_regional_release_date/film_release_distribution_medium	/m/029j_
/m/0j0k	/location/location/contains	/m/01ppq
/m/01chg	/media_common/netflix_genre/titles	/m/0f42nz
/m/07s846j	/award/award_winning_work/awards_won./award/award_honor/award	/m/02w9sd7
/m/05c1t6z	/award/award_ceremony/awards_presented./award/award_honor/award_winner	/m/04glr5h
/m/0kfv9	/tv/tv_program/regular_cast./tv/regular_tv_appearance/actor	/m/02lfcm
/m/0g768	/music/record_label/artist	/m/0f0y8
/m/08lr6s	/film/film/genre	/m/04xvlr
/m/0ggq0m	/music/genre/artists	/m/02sjp
/m/059gkk	/award/award_winner/awards_won./award/award_honor/award_winner	/m/02lg9w
/m/0gq_v	/award/award_category/nominees./award/award_nomination/nominated_for	/m/0m_h6
/m/03ryn	/olympics/olympic_participating_country/medals_won./olympics/olympic_medal_honor/olympics	/m/0kbvb
/m/024rdh	/film/film_distributor/films_distributed./film/film_film_distributor_relationship/film	/m/0_9l_
/m/0bmhvpr	/award/award_winning_work/awards_won./award/award_honor/award_winner	/m/02pv_d
/m/02fttd	/film/film/release_date_s./film/film_regional_release_date/film_release_region	/m/03_3d
/m/027kp3	/education/educational_institution/students_graduates./education/education/student	/m/02lgj6
/m/041288	/organization/organization/headquarters./location/mailing_address/citytown	/m/0177z
/m/04zkj5	/film/actor/film./film/performance/film	/m/026f__m
/m/06r4f	/tv/tv_program/genre	/m/06n90
/m/0133_p	/music/genre/artists	/m/01wl38s
/m/0bvls5	/people/person/profession	/m/02jknp
/m/026ps1	/people/person/nationality	/m/0d060g
/m/09n5t_	/music/genre/artists	/m/0gcs9
/m/01wy6	/music/performance_role/regular_performances./music/group_membership/group	/m/014pg1
/m/0416y94	/film/film/produced_by	/m/01gzm2
/m/060c4	/organization/role/leaders./organization/leadership/organization	/m/02dj3
/m/033s6	/award/award_nominee/award_nominations./award/award_nomination/award	/m/03qbnj
/m/09fb5	/award/award_winner/awards_won./award/award_honor/award_winner	/m/07yp0f
/m/02pt6k_	/award/award_nominee/award_nominations./award/award_nomination/nominated_for	/m/05gnf
/m/05tg3	/american_football/football_team/current_roster./sports/sports_team_roster/position	/m/01r3hr
/m/07wlt	/organization/organization/headquarters./location/mailing_address/citytown	/m/07ypt
/m/04328m	/people/person/gender	/m/02zsn
/m/04t6fk	/film/film/genre	/m/0gf28
/m/0l6m5	/olympics/olympic_games/sports	/m/07jjt
/m/0bmhvpr	/film/film/release_date_s./film/film_regional_release_date/film_release_region	/m/03h64
/m/01ljpm	/education/educational_institution/colors	/m/04mkbj
/m/01vsy95	/music/artist/track_contributions./music/track_contribution/role	/m/026t6
/m/0yx_w	/film/film/language	/m/02bjrlw
/m/02cg7g	/government/legislative_session/members./government/government_position_held/district_represented	/m/0vmt
/m/034rd	/government/politician/government_positions_held./government/government_position_held/legislative_sessions	/m/05rrw9
/m/09jm8	/award/award_nominee/award_nominations./award/award_nomination/award	/m/01c4_6
/m/0fq27fp	/film/film/estimated_budget./measurement_unit/dated_money_value/currency	/m/01nv4h
/m/05xf75	/award/award_nominee/award_nominations./award/award_nomination/award	/m/057xs89
/m/03gr7w	/award/award_nominee/award_nominations./award/award_nomination/award	/m/01c427
/m/018wrk	/olympics/olympic_games/sports	/m/02bkg
/m/04sntd	/film/film/genre	/m/01jfsb
/m/01kv4mb	/award/award_nominated_work/award_nominations./award/award_nomination/nominated_for	/m/0bhvtc
/m/01yg9y	/award/award_nominee/award_nominations./award/award_nomination/award_nominee	/m/06jvj7
/m/02hfp_	/people/person/profession	/m/02jknp
/m/08vlns	/music/genre/artists	/m/03c602
/m/01l47f5	/award/award_winner/awards_won./award/award_honor/award_winner	/m/01ww2fs
/m/04x4s2	/tv/tv_producer/programs_produced./tv/tv_producer_term/program	/m/0kfv9
/m/01mszz	/award/award_winning_work/awards_won./award/award_honor/award	/m/05b1610
/m/073h5b	/award/award_ceremony/awards_presented./award/award_honor/honored_for	/m/0_9l_
/m/09bymc	/award/award_ceremony/awards_presented./award/award_honor/honored_for	/m/046488
/m/0hmtk	/sports/sports_team/sport	/m/03tmr
/m/082scv	/film/film/music	/m/01l1rw
/m/01vw37m	/award/award_nominee/award_nominations./award/award_nomination/award_nominee	/m/026r8q
/m/05jcn8	/award/award_nominee/award_nominations./award/award_nomination/award	/m/0gqzz
/m/059j2	/organization/organization_member/member_of./organization/organization_membership/organization	/m/018cqq
/m/05jcn8	/people/person/profession	/m/01d_h8
/m/0bhtzw	/people/person/nationality	/m/0345h
/m/016sp_	/award/award_nominee/award_nominations./award/award_nomination/award_nominee	/m/01l47f5
/m/06s6hs	/people/person/places_lived./people/place_lived/location	/m/0fr0t
/m/0jmk7	/sports/sports_team/colors	/m/083jv
/m/0g22z	/award/award_winning_work/awards_won./award/award_honor/award	/m/05b4l5x
/m/0137g1	/music/artist/track_contributions./music/track_contribution/role	/m/05r5c
/m/051m56	/award/award_winner/awards_won./award/award_honor/award_winner	/m/03cfjg
/m/0g7pm1	/film/film/other_crew./film/film_crew_gig/film_crew_role	/m/0263ycg
/m/0ptx_	/film/film/featured_film_locations	/m/0cr3d
/m/0ch26b_	/award/award_winning_work/awards_won./award/award_honor/award	/m/018wdw
/m/047lj	/location/location/adjoin_s./location/adjoining_relationship/adjoins	/m/07t_x
/m/02d4ct	/award/award_nominee/award_nominations./award/award_nomination/award_nominee	/m/02lkcc
/m/01n4bh	/music/genre/artists	/m/03j1p2n
/m/01nxzv	/people/person/spouse_s./people/marriage/type_of_union	/m/01g63y
/m/011yfd	/film/film/release_date_s./film/film_regional_release_date/film_release_distribution_medium	/m/029j_
/m/04qk12	/film/film/genre	/m/060__y
/m/03902	/travel/travel_destination/how_to_get_here./travel/transportation/mode_of_transportation	/m/025t3bg
/m/041jlr	/people/person/places_lived./people/place_lived/location	/m/02h6_6p
/m/0hm4q	/organization/role/leaders./organization/leadership/organization	/m/02pbzv
/m/03_gd	/people/person/profession	/m/02jknp
/m/02r6nbc	/award/award_category/disciplines_or_subjects	/m/02xlf
/m/07c52	/media_common/netflix_genre/titles	/m/01vnbh
/m/01wkmgb	/music/group_member/membership./music/group_membership/role	/m/042v_gx
/m/017s11	/award/award_nominee/award_nominations./award/award_nomination/award_nominee	/m/016bx2
/m/067ghz	/film/film/release_date_s./film/film_regional_release_date/film_release_region	/m/0345h
/m/0cmc26r	/film/film/release_date_s./film/film_regional_release_date/film_release_region	/m/06t8v
/m/040t74	/people/person/gender	/m/02zsn
/m/02vx4	/olympics/olympic_sport/athletes./olympics/olympic_athlete_affiliation/country	/m/059j2
/m/03kcyd	/award/award_nominee/award_nominations./award/award_nomination/award_nominee	/m/014zcr
/m/01wn718	/music/artist/origin	/m/01_d4
/m/01yhm	/sports/professional_sports_team/draft_picks./sports/sports_league_draft_pick/school	/m/0160nk
/m/020h2v	/film/film_distributor/films_distributed./film/film_film_distributor_relationship/film	/m/072r5v
/m/027ht3n	/award/award_nominee/award_nominations./award/award_nomination/award	/m/0cqh6z
/m/02cx90	/award/award_nominee/award_nominations./award/award_nomination/award_nominee	/m/03cfjg
/m/01j5ts	/base/popstra/celebrity/dated./base/popstra/dated/participant	/m/09fb5
/m/0b80__	/people/person/employment_history./business/employment_tenure/company	/m/017s11
/m/01wj9y9	/people/person/profession	/m/018gz8
/m/01hf6	/location/administrative_division/country	/m/05sb1
/m/05zl0	/education/educational_institution/students_graduates./education/education/major_field_of_study	/m/0dc_v
/m/01nvmd_	/award/award_nominee/award_nominations./award/award_nomination/award_nominee	/m/01gq0b
/m/03bw6	/award/award_nominee/award_nominations./award/award_nomination/nominated_for	/m/0gxfz
/m/012fvq	/education/educational_institution/students_graduates./education/education/major_field_of_study	/m/0fdys
/m/04ljl_l	/award/award_category/nominees./award/award_nomination/nominated_for	/m/029k4p
/m/06x58	/film/actor/film./film/performance/film	/m/0cmf0m0
/m/01c4_6	/award/award_category/winners./award/award_honor/award_winner	/m/0dvqq
/m/069d71	/people/person/places_lived./people/place_lived/location	/m/0n1rj
/m/02qfv5d	/media_common/netflix_genre/titles	/m/0296rz
/m/028r4y	/award/award_nominee/award_nominations./award/award_nomination/award_nominee	/m/07h565
/m/07_l6	/music/instrument/instrumentalists	/m/082db
/m/07bs0	/olympics/olympic_sport/athletes./olympics/olympic_athlete_affiliation/country	/m/047lj
/m/01tz_d	/ice_hockey/hockey_team/current_roster./sports/sports_team_roster/position	/m/02qvzf
/m/01ypc	/sports/sports_team/roster./baseball/baseball_roster_position/position	/m/02dwn9
/m/0z05l	/award/award_nominee/award_nominations./award/award_nomination/award_nominee	/m/015p3p
/m/032nwy	/award/award_winner/awards_won./award/award_honor/award_winner	/m/01vsy95
/m/031b3h	/award/award_category/winners./award/award_honor/award_winner	/m/01vvlyt
/m/04g73n	/film/film/release_date_s./film/film_regional_release_date/film_release_distribution_medium	/m/029j_
/m/0hm4q	/organization/role/leaders./organization/leadership/organization	/m/02bbyw
/m/0fqyc	/base/aareas/schema/administrative_area/capital	/m/0h095
/m/042v_gx	/music/performance_role/track_performances./music/track_contribution/role	/m/0151b0
/m/02z13jg	/award/award_category/winners./award/award_honor/award_winner	/m/09fb5
/m/05r6t	/music/genre/artists	/m/017lb_
/m/0bx_hnp	/film/film/release_date_s./film/film_regional_release_date/film_release_region	/m/0k6nt
/m/05c1t6z	/award/award_ceremony/awards_presented./award/award_honor/award_winner	/m/047c9l
/m/012d40	/people/person/profession	/m/01d_h8
/m/01bmlb	/award/award_nominee/award_nominations./award/award_nomination/award	/m/04ljl_l
/m/02qydsh	/film/film/release_date_s./film/film_regional_release_date/film_release_distribution_medium	/m/029j_
/m/02mc79	/award/award_nominee/award_nominations./award/award_nomination/award_nominee	/m/017s11
/m/09tqx3	/people/person/languages	/m/07c9s
/m/07t3x8	/award/award_nominee/award_nominations./award/award_nomination/award	/m/03rbj2
/m/0jrg	/film/film_subject/films	/m/049mql
/m/057xs89	/award/award_category/winners./award/award_honor/award_winner	/m/0pmhf
/m/09b6zr	/people/person/religion	/m/02rsw
/m/02zd460	/education/educational_institution/students_graduates./education/education/major_field_of_study	/m/0dc_v
/m/01_d4	/travel/travel_destination/climate./travel/travel_destination_monthly_climate/month	/m/0ll3
/m/01vsnff	/music/artist/track_contributions./music/track_contribution/role	/m/042v_gx
/m/027986c	/award/award_category/winners./award/award_honor/award_winner	/m/0h5g_
/m/02n9nmz	/award/award_category/nominees./award/award_nomination/nominated_for	/m/09cr8
/m/0bl5c	/film/film/release_date_s./film/film_regional_release_date/film_release_distribution_medium	/m/029j_
/m/01vvlyt	/award/award_winner/awards_won./award/award_honor/award_winner	/m/01vrt_c
/m/02x73k6	/award/award_category/nominees./award/award_nomination/nominated_for	/m/0fy34l
/m/0404j37	/film/film/release_date_s./film/film_regional_release_date/film_release_distribution_medium	/m/029j_
/m/02vx4	/olympics/olympic_sport/athletes./olympics/olympic_athlete_affiliation/country	/m/03_3d
/m/083my7	/sports/sports_team/colors	/m/083jv
/m/08gg47	/film/film/genre	/m/03k9fj
/m/0pz6q	/education/educational_institution/colors	/m/083jv
/m/0f4dx2	/award/award_winner/awards_won./award/award_honor/award_winner	/m/02tr7d
/m/05r5c	/music/instrument/instrumentalists	/m/0c73g
/m/02vjzr	/music/genre/artists	/m/09qr6
/m/02lnbg	/music/genre/artists	/m/03f5spx
/m/019v9k	/education/educational_degree/people_with_this_degree./education/education/institution	/m/01vs5c
/m/06j8wx	/award/award_winner/awards_won./award/award_honor/award_winner	/m/016gr2
/m/024n3z	/award/award_winner/awards_won./award/award_honor/award_winner	/m/01kwld
/m/07nnp_	/film/film/genre	/m/02js9
/m/01mqz0	/base/popstra/celebrity/friendship./base/popstra/friendship/participant	/m/0bdt8
/m/01_xtx	/base/popstra/celebrity/canoodled./base/popstra/canoodled/participant	/m/0bksh
/m/03_8r	/olympics/olympic_sport/athletes./olympics/olympic_athlete_affiliation/country	/m/0jdd
/m/077yk0	/award/award_nominee/award_nominations./award/award_nomination/award_nominee	/m/07m77x
/m/03zz8b	/people/person/place_of_birth	/m/0_3cs
/m/03t79f	/film/film/executive_produced_by	/m/04flrx
/m/02rmd_2	/film/film/release_date_s./film/film_regional_release_date/film_release_region	/m/0k6nt
/m/04xvlr	/media_common/netflix_genre/titles	/m/089j8p
/m/0hvb2	/film/actor/film./film/performance/film	/m/01flv_
/m/0bhvtc	/award/award_nominated_work/award_nominations./award/award_nomination/nominated_for	/m/0pmw9
/m/07s846j	/award/award_winning_work/awards_won./award/award_honor/award	/m/02n9nmz
/m/01ypc	/baseball/baseball_team/team_stats./baseball/baseball_team_stats/season	/m/03c6sl9
/m/02qvzf	/sports/sports_position/players./sports/sports_team_roster/team	/m/032yps
/m/02flq1	/award/award_category/winners./award/award_honor/ceremony	/m/02rjjll
/m/01zn4y	/organization/organization/headquarters./location/mailing_address/citytown	/m/0dhdp
/m/01gb54	/film/film_distributor/films_distributed./film/film_film_distributor_relationship/film	/m/02ctc6
/m/0161c2	/people/person/nationality	/m/0d060g
/m/02w9sd7	/award/award_category/nominees./award/award_nomination/nominated_for	/m/0gmgwnv
/m/0309jm	/people/person/religion	/m/0kpl
/m/0ds3t5x	/film/film/release_date_s./film/film_regional_release_date/film_release_region	/m/03h64
/m/06wvfq	/award/award_nominee/award_nominations./award/award_nomination/award	/m/03r8v_
/m/05qfh	/education/field_of_study/students_majoring./education/education/student	/m/01mqh5
/m/059j2	/sports/sports_team_location/teams	/m/02ltg3
/m/02ndy4	/film/film/release_date_s./film/film_regional_release_date/film_release_distribution_medium	/m/029j_
/m/07csf4	/award/award_winner/awards_won./award/award_honor/award_winner	/m/016zp5
/m/02j3w	/base/petbreeds/city_with_dogs/top_breeds./base/petbreeds/dog_city_relationship/dog_breed	/m/01t032
/m/01846t	/award/award_winner/awards_won./award/award_honor/award_winner	/m/024n3z
/m/05148p4	/music/instrument/instrumentalists	/m/0kvjrw
/m/0181dw	/music/record_label/artist	/m/018dyl
/m/05qg6g	/people/person/places_lived./people/place_lived/location	/m/027rn
/m/03bnv	/award/award_winner/awards_won./award/award_honor/award_winner	/m/018dyl
/m/015f7	/tv/tv_personality/tv_regular_appearances./tv/tv_regular_personal_appearance/program	/m/026bfsh
/m/02pjvc	/film/actor/film./film/performance/film	/m/0bs8ndx
/m/01b_d4	/education/university/international_tuition./measurement_unit/dated_money_value/currency	/m/01nv4h
/m/0170pk	/award/award_nominee/award_nominations./award/award_nomination/nominated_for	/m/09gq0x5
/m/0jsf6	/award/award_winning_work/awards_won./award/award_honor/honored_for	/m/0ptx_
/m/06y_n	/award/award_winning_work/awards_won./award/award_honor/award_winner	/m/086nl7
/m/08s_lw	/award/award_nominee/award_nominations./award/award_nomination/award_nominee	/m/04mz10g
/m/06fmdb	/award/award_nominee/award_nominations./award/award_nomination/award_nominee	/m/0dvld
/m/0gjcrrw	/film/film/release_date_s./film/film_regional_release_date/film_release_region	/m/03h64
/m/024lt6	/award/award_winning_work/awards_won./award/award_honor/award	/m/02x73k6
/m/08hmch	/film/film/release_date_s./film/film_regional_release_date/film_release_region	/m/07twz
/m/0428bc	/people/deceased_person/place_of_death	/m/02_286
/m/0cg9f	/award/award_nominee/award_nominations./award/award_nomination/award	/m/02w9sd7
/m/04cv9m	/film/film/music	/m/02cyfz
/m/06_6j3	/people/person/places_lived./people/place_lived/location	/m/05tbn
/m/0mzkr	/music/record_label/artist	/m/0232lm
/m/01j5ts	/people/person/profession	/m/02jknp
/m/01vsyjy	/base/schemastaging/person_extra/net_worth./measurement_unit/dated_money_value/currency	/m/01nv4h
/m/01g1lp	/award/award_nominee/award_nominations./award/award_nomination/award	/m/02x4wr9
/m/03f2_rc	/people/person/places_lived./people/place_lived/location	/m/0cr3d
/m/03f0r5w	/award/award_nominee/award_nominations./award/award_nomination/award_nominee	/m/04j_gs
/m/01fh36	/music/genre/artists	/m/0163m1
/m/012vd6	/award/award_nominee/award_nominations./award/award_nomination/award	/m/02f79n
/m/014zcr	/base/popstra/celebrity/canoodled./base/popstra/canoodled/participant	/m/02z1yj
/m/014zcr	/base/popstra/celebrity/dated./base/popstra/dated/participant	/m/02z1yj
/m/01l1ls	/award/award_nominee/award_nominations./award/award_nomination/award	/m/0bdw1g
/m/0167q3	/base/biblioness/bibs_location/state	/m/01x73
/m/011_3s	/award/award_nominee/award_nominations./award/award_nomination/award_nominee	/m/01gbn6
/m/06mzp	/olympics/olympic_participating_country/medals_won./olympics/olympic_medal_honor/olympics	/m/01f1kd
/m/03c602	/award/award_nominee/award_nominations./award/award_nomination/award	/m/02w7fs
/m/09gq0x5	/award/award_winning_work/awards_won./award/award_honor/award	/m/02x73k6
/m/0cyhq	/people/deceased_person/place_of_burial	/m/01f38z
/m/095zlp	/film/film/featured_film_locations	/m/02_286
/m/0456xp	/award/award_nominee/award_nominations./award/award_nomination/nominated_for	/m/03qcfvw
/m/018wdw	/award/award_category/winners./award/award_honor/ceremony	/m/073hd1
/m/01hmk9	/people/person/profession	/m/01d_h8
/m/0gkkf	/education/university/local_tuition./measurement_unit/dated_money_value/currency	/m/01nv4h
/m/0dq_5	/organization/role/leaders./organization/leadership/organization	/m/03d6fyn
/m/02wh75	/award/award_category/winners./award/award_honor/ceremony	/m/02rjjll
/m/01j7pt	/tv/tv_network/programs./tv/tv_network_duration/program	/m/01j7mr
/m/0163m1	/award/award_nominee/award_nominations./award/award_nomination/award	/m/031b3h
/m/0794g	/award/award_winner/awards_won./award/award_honor/award_winner	/m/026r8q
/m/02sg5v	/award/award_nominated_work/award_nominations./award/award_nomination/nominated_for	/m/0g5pvv
/m/06by7	/music/genre/artists	/m/0gs6vr
/m/02xwzh	/education/educational_institution/students_graduates./education/education/student	/m/038nv6
/m/042v_gx	/music/performance_role/regular_performances./music/group_membership/role	/m/0dwsp
/m/07733f	/organization/organization/headquarters./location/mailing_address/citytown	/m/0r00l
/m/07g1sm	/film/film/release_date_s./film/film_regional_release_date/film_release_distribution_medium	/m/029j_
/m/02x73k6	/award/award_category/nominees./award/award_nomination/nominated_for	/m/04j4tx
/m/0pmhf	/award/award_nominee/award_nominations./award/award_nomination/nominated_for	/m/023gxx
/m/024n3z	/award/award_nominee/award_nominations./award/award_nomination/award_nominee	/m/01846t
/m/02x73k6	/award/award_category/winners./award/award_honor/award_winner	/m/016fjj
/m/099cng	/award/award_category/winners./award/award_honor/award_winner	/m/0mz73
/m/0308kx	/award/award_winner/awards_won./award/award_honor/award_winner	/m/01wb8bs
/m/0fpgp26	/film/film/release_date_s./film/film_regional_release_date/film_release_region	/m/09pmkv
/m/081lh	/influence/influence_node/influenced_by	/m/01s7qqw
/m/064t9	/music/genre/artists	/m/026spg
/m/0gh6j94	/film/film/release_date_s./film/film_regional_release_date/film_release_region	/m/0345h
/m/0hnjt	/people/person/places_lived./people/place_lived/location	/m/01x73
/m/019v9k	/education/educational_degree/people_with_this_degree./education/education/institution	/m/02zd460
/m/0gq_d	/award/award_category/winners./award/award_honor/ceremony	/m/0bzknt
/m/01vz0g4	/award/award_nominee/award_nominations./award/award_nomination/award_nominee	/m/013w7j
/m/02gvwz	/people/person/spouse_s./people/marriage/location_of_ceremony	/m/0nbfm
/m/0k4f3	/film/film/written_by	/m/0c921
/m/05148p4	/music/instrument/instrumentalists	/m/028q6
/m/03lrht	/film/film/genre	/m/01jfsb
/m/0khth	/award/award_nominee/award_nominations./award/award_nomination/award	/m/02ddq4
/m/02vx4	/sports/sport/pro_athletes./sports/pro_sports_played/athlete	/m/026n047
/m/0b_72t	/base/marchmadness/ncaa_basketball_tournament/seeds./base/marchmadness/ncaa_tournament_seed/team	/m/02py8_w
/m/01d650	/organization/endowed_organization/endowment./measurement_unit/dated_money_value/currency	/m/01nv4h
/m/06mxs	/travel/travel_destination/climate./travel/travel_destination_monthly_climate/month	/m/06vkl
/m/0g768	/music/record_label/artist	/m/012x03
/m/099p5	/people/person/religion	/m/04pk9
/m/0gjcrrw	/award/award_nominated_work/award_nominations./award/award_nomination/nominated_for	/m/0fphf3v
/m/0fn2g	/travel/travel_destination/climate./travel/travel_destination_monthly_climate/month	/m/06vkl
/m/060c4	/business/job_title/people_with_this_title./business/employment_tenure/company	/m/0288zy
/m/05r5c	/music/instrument/instrumentalists	/m/01vvy
/m/0ftps	/music/artist/track_contributions./music/track_contribution/role	/m/05r5c
/m/049n2l	/sports/sports_team/sport	/m/02vx4
/m/02d4ct	/award/award_nominee/award_nominations./award/award_nomination/award_nominee	/m/014zcr
/m/067ghz	/film/film/genre	/m/03k9fj
/m/09krp	/base/biblioness/bibs_location/country	/m/0345h
/m/0blpg	/film/film/genre	/m/06cvj
/m/027t8fw	/award/award_nominee/award_nominations./award/award_nomination/nominated_for	/m/072r5v
/m/012d40	/award/award_nominee/award_nominations./award/award_nomination/award	/m/0dgr5xp
/m/05bt6j	/music/genre/artists	/m/015cqh
/m/064t9	/music/genre/artists	/m/01htxr
/m/01gvsn	/film/film/production_companies	/m/017s11
/m/042ly5	/award/award_nominee/award_nominations./award/award_nomination/award_nominee	/m/016fjj
/m/07t_l23	/award/award_category/winners./award/award_honor/award_winner	/m/04jlgp
/m/032zq6	/film/film/genre	/m/03rzvv
/m/01gvxv	/people/person/gender	/m/02zsn
/m/02fn5	/people/person/places_lived./people/place_lived/location	/m/02_286
/m/01gzm2	/award/award_nominee/award_nominations./award/award_nomination/award	/m/05b1610
/m/044n3h	/award/award_winner/awards_won./award/award_honor/award_winner	/m/01sl1q
/m/05r5c	/music/instrument/instrumentalists	/m/03j24kf
/m/060c4	/government/government_office_category/officeholders./government/government_position_held/jurisdiction_of_office	/m/07t_x
/m/012j8z	/people/person/place_of_birth	/m/074r0
/m/0h27vc	/people/person/profession	/m/018gz8
/m/024tcq	/government/legislative_session/members./government/government_position_held/district_represented	/m/02xry
/m/034zc0	/film/actor/film./film/performance/film	/m/029zqn
/m/05k2xy	/film/film/release_date_s./film/film_regional_release_date/film_release_distribution_medium	/m/029j_
/m/03tn80	/film/film/language	/m/071fb
/m/085ccd	/film/film/release_date_s./film/film_regional_release_date/film_release_region	/m/03h64
/m/01rv7x	/people/ethnicity/people	/m/02n1p5
/m/07rlg	/olympics/olympic_sport/athletes./olympics/olympic_athlete_affiliation/country	/m/0165b
/m/0dc_v	/education/field_of_study/students_majoring./education/education/major_field_of_study	/m/05qjt
/m/0g2jl	/education/educational_institution/students_graduates./education/education/major_field_of_study	/m/01mkq
/m/01x73	/location/location/contains	/m/0m2fr
/m/0fdys	/education/field_of_study/students_majoring./education/education/student	/m/016h4r
/m/02x4sn8	/award/award_category/nominees./award/award_nomination/nominated_for	/m/092vkg
/m/06l22	/sports/sports_team/sport	/m/02vx4
/m/04j_gs	/people/person/places_lived./people/place_lived/location	/m/02_286
/m/01f1kd	/olympics/olympic_games/sports	/m/03tmr
/m/040t74	/award/award_nominee/award_nominations./award/award_nomination/award_nominee	/m/022yb4
/m/013b6_	/people/ethnicity/people	/m/0hwqz
/m/01hkhq	/award/award_nominee/award_nominations./award/award_nomination/award_nominee	/m/051wwp
/m/0k7pf	/award/award_nominee/award_nominations./award/award_nomination/award	/m/03qbnj
/m/05q_dw	/film/film/featured_film_locations	/m/02_286
/m/0194d	/olympics/olympic_sport/athletes./olympics/olympic_athlete_affiliation/country	/m/03ryn
/m/08qxx9	/award/award_nominee/award_nominations./award/award_nomination/award_nominee	/m/0c6qh
/m/01m7pwq	/people/person/nationality	/m/0d060g
/m/014zcr	/award/award_nominee/award_nominations./award/award_nomination/award_nominee	/m/0c6qh
/m/047c9l	/award/award_nominee/award_nominations./award/award_nomination/award	/m/09qs08
/m/01jrp0	/people/person/spouse_s./people/marriage/spouse	/m/01rnxn
/m/01cf93	/music/record_label/artist	/m/05xq9
/m/0bwfn	/education/educational_institution/students_graduates./education/education/student	/m/0f4dx2
/m/02681xs	/award/award_category/winners./award/award_honor/award_winner	/m/03c602
/m/044n3h	/people/person/places_lived./people/place_lived/location	/m/02_286
/m/03z106	/film/film/runtime./film/film_cut/film_release_region	/m/0345h
/m/088xp	/organization/organization_member/member_of./organization/organization_membership/organization	/m/041288
/m/0347xl	/award/award_nominee/award_nominations./award/award_nomination/nominated_for	/m/015ppk
/m/02j490	/award/award_nominee/award_nominations./award/award_nomination/award	/m/02x73k6
/m/0p9sw	/award/award_category/nominees./award/award_nomination/nominated_for	/m/012s1d
/m/032j_n	/organization/organization/headquarters./location/mailing_address/citytown	/m/02_286
/m/05b2gsm	/award/award_nominee/award_nominations./award/award_nomination/nominated_for	/m/042y1c
/m/05sq0m	/award/award_nominee/award_nominations./award/award_nomination/award_nominee	/m/051m56
/m/02lfl4	/award/award_nominee/award_nominations./award/award_nomination/award_nominee	/m/0bl60p
/m/0137n0	/award/award_nominee/award_nominations./award/award_nomination/award	/m/02sp_v
/m/0g_bh	/music/genre/parent_genre	/m/06by7
/m/03_8r	/olympics/olympic_sport/athletes./olympics/olympic_athlete_affiliation/country	/m/07twz
/m/056k77g	/film/film/genre	/m/01hmnh
/m/02mxbd	/people/person/gender	/m/02zsn
/m/02r6gw6	/sports/sports_league_draft/picks./sports/sports_league_draft_pick/school	/m/027mdh
/m/09j028	/soccer/football_player/current_team./sports/sports_team_roster/team	/m/045xx
/m/0478__m	/award/award_nominee/award_nominations./award/award_nomination/award_nominee	/m/0dvqq
/m/091z_p	/film/film/release_date_s./film/film_regional_release_date/film_release_distribution_medium	/m/029j_
/m/026m3y	/education/university/domestic_tuition./measurement_unit/dated_money_value/currency	/m/01nv4h
/m/0pmw9	/award/award_nominated_work/award_nominations./award/award_nomination/nominated_for	/m/03cfjg
/m/0gvsh7l	/award/award_winning_work/awards_won./award/award_honor/award_winner	/m/01gq0b
/m/054g1r	/film/film_distributor/films_distributed./film/film_film_distributor_relationship/film	/m/027s39y
/m/02vx4	/olympics/olympic_sport/athletes./olympics/olympic_athlete_affiliation/country	/m/06srk
/m/01q8hj	/education/educational_institution/colors	/m/083jv
/m/01hmnh	/media_common/netflix_genre/titles	/m/0fzm0g
/m/0g5y6	/people/ethnicity/people	/m/03bw6
/m/0794g	/award/award_nominee/award_nominations./award/award_nomination/award	/m/05pcn59
/m/051z6mv	/award/award_nominee/award_nominations./award/award_nomination/award_nominee	/m/0cb77r
/m/0794g	/award/award_winner/awards_won./award/award_honor/award_winner	/m/01vw37m
/m/047msdk	/film/film/release_date_s./film/film_regional_release_date/film_release_region	/m/06mzp
/m/02qt02v	/award/award_category/winners./award/award_honor/award_winner	/m/04k25
/m/02_286	/base/petbreeds/city_with_dogs/top_breeds./base/petbreeds/dog_city_relationship/dog_breed	/m/01t032
/m/05lfwd	/award/award_winning_work/awards_won./award/award_honor/award	/m/0gkts9
/m/02tr7d	/award/award_winner/awards_won./award/award_honor/award_winner	/m/051wwp
/m/0bbm7r	/award/award_winning_work/awards_won./award/award_honor/award_winner	/m/016ywr
/m/01gvyp	/people/person/place_of_birth	/m/0lphb
/m/0cjk9	/language/human_language/countries_spoken_in	/m/01mjq
/m/01gb54	/film/film_distributor/films_distributed./film/film_film_distributor_relationship/film	/m/0gldyz
/m/03mnk	/base/schemastaging/organization_extra/phone_number./base/schemastaging/phone_sandbox/contact_category	/m/014dgf
/m/012vwb	/education/university/fraternities_and_sororities	/m/035tlh
/m/03clrng	/award/award_nominee/award_nominations./award/award_nomination/award_nominee	/m/026dg51
/m/07s846j	/award/award_winning_work/awards_won./award/award_honor/award	/m/09d28z
/m/06fpsx	/film/film/produced_by	/m/05ty4m
/m/02r251z	/award/award_nominee/award_nominations./award/award_nomination/nominated_for	/m/0ch3qr1
/m/07_l6	/music/performance_role/regular_performances./music/group_membership/role	/m/05148p4
/m/02yv6b	/music/genre/artists	/m/016h9b
/m/01sl1q	/base/popstra/celebrity/friendship./base/popstra/friendship/participant	/m/049qx
/m/0410cp	/people/person/religion	/m/04pk9
/m/092kgw	/people/person/profession	/m/01d_h8
/m/051wwp	/award/award_nominee/award_nominations./award/award_nomination/nominated_for	/m/092vkg
/m/0127ps	/film/film/release_date_s./film/film_regional_release_date/film_release_distribution_medium	/m/029j_
/m/0gwjw0c	/film/film/release_date_s./film/film_regional_release_date/film_release_region	/m/0345h
/m/02qcr	/film/film/genre	/m/073_6
/m/092kgw	/award/award_nominee/award_nominations./award/award_nomination/nominated_for	/m/02mt51
/m/03fnqj	/sports/sports_team/sport	/m/02vx4
/m/024lt6	/film/film/production_companies	/m/020h2v
/m/015mrk	/award/award_nominee/award_nominations./award/award_nomination/award_nominee	/m/0bkf4
/m/02rqxc	/sports/sports_team/sport	/m/02vx4
/m/02rg_4	/education/educational_institution/colors	/m/083jv
/m/03ftmg	/people/person/profession	/m/02jknp
/m/09_bl	/olympics/olympic_sport/athletes./olympics/olympic_athlete_affiliation/country	/m/01mjq
/m/07_53	/olympics/olympic_sport/athletes./olympics/olympic_athlete_affiliation/country	/m/07fj_
/m/051wwp	/award/award_winner/awards_won./award/award_honor/award_winner	/m/01sp81
/m/0dvld	/award/award_nominee/award_nominations./award/award_nomination/award_nominee	/m/015q43
/m/0kbvb	/olympics/olympic_games/sports	/m/07gyv
/m/01pkhw	/people/person/place_of_birth	/m/01xr6x
/m/0l6px	/award/award_nominee/award_nominations./award/award_nomination/award_nominee	/m/01hkhq
/m/03n_7k	/award/award_nominee/award_nominations./award/award_nomination/award	/m/02x73k6
/m/07c52	/media_common/netflix_genre/titles	/m/02rcwq0
/m/060c4	/government/government_office_category/officeholders./government/government_position_held/jurisdiction_of_office	/m/0jhd
/m/0gvvm6l	/film/film/release_date_s./film/film_regional_release_date/film_release_region	/m/06mzp
/m/0794g	/award/award_nominee/award_nominations./award/award_nomination/nominated_for	/m/03cmsqb
/m/0g55tzk	/award/award_ceremony/awards_presented./award/award_honor/award_winner	/m/016gr2
/m/09k0f	/people/person/nationality	/m/0d04z6
/m/03v0t	/location/location/contains	/m/065r8g
/m/0243cq	/film/film/release_date_s./film/film_regional_release_date/film_release_region	/m/0k6nt
/m/01yhm	/sports/sports_team/colors	/m/083jv
/m/02x1z2s	/award/award_category/nominees./award/award_nomination/nominated_for	/m/06w99h3
/m/01d5vk	/film/actor/film./film/performance/film	/m/0h1v19
/m/0133_p	/music/genre/artists	/m/01vsnff
/m/016srn	/award/award_nominee/award_nominations./award/award_nomination/award	/m/01c9f2
/m/01ky7c	/education/educational_institution/students_graduates./education/education/student	/m/026spg
/m/032nl2	/film/actor/film./film/performance/film	/m/025rxjq
/m/07wm6	/education/educational_institution/students_graduates./education/education/student	/m/03mdw3c
/m/08tq4x	/film/film/release_date_s./film/film_regional_release_date/film_release_region	/m/059j2
/m/01x6v6	/award/award_nominee/award_nominations./award/award_nomination/nominated_for	/m/035bcl
/m/02x1z2s	/award/award_category/nominees./award/award_nomination/nominated_for	/m/0315rp
/m/0hhggmy	/film/film/release_date_s./film/film_regional_release_date/film_release_region	/m/059j2
/m/01x2tm8	/people/person/religion	/m/0kpl
/m/0mzkr	/music/record_label/artist	/m/01vrncs
/m/069_0y	/award/award_nominee/award_nominations./award/award_nomination/award_nominee	/m/02404v
/m/018wdw	/award/award_category/winners./award/award_honor/award_winner	/m/04wp63
/m/07wjk	/education/educational_institution/colors	/m/083jv
/m/018wdw	/award/award_category/nominees./award/award_nomination/nominated_for	/m/03x7hd
/m/08lr6s	/award/award_winning_work/awards_won./award/award_honor/award_winner	/m/04fyhv
/m/0407yfx	/film/film/genre	/m/01hmnh
/m/04xvlr	/media_common/netflix_genre/titles	/m/01rwyq
/m/099flj	/award/award_category/nominees./award/award_nomination/nominated_for	/m/0fpv_3_
/m/027s39y	/award/award_winning_work/awards_won./award/award_honor/award_winner	/m/05jcn8
/m/09qrn4	/award/award_category/nominees./award/award_nomination/nominated_for	/m/0124k9
/m/01yhm	/sports/professional_sports_team/draft_picks./sports/sports_league_draft_pick/school	/m/01fsv9
/m/0192hw	/film/film/release_date_s./film/film_regional_release_date/film_release_region	/m/0d060g
/m/0gvbw	/base/schemastaging/organization_extra/phone_number./base/schemastaging/phone_sandbox/service_location	/m/0d060g
/m/06z8s_	/film/film/genre	/m/04btyz
/m/01wd9lv	/people/person/profession	/m/01d_h8
/m/03zv9	/sports/sports_league/teams./sports/sports_league_participation/team	/m/045xx
/m/07bdd_	/award/award_category/nominees./award/award_nomination/nominated_for	/m/03459x
/m/026w_gk	/award/award_nominee/award_nominations./award/award_nomination/award_nominee	/m/02773nt
/m/03cfjg	/award/award_winner/awards_won./award/award_honor/award_winner	/m/01lmj3q
/m/03x7hd	/film/film/other_crew./film/film_crew_gig/crewmember	/m/0bbxx9b
/m/0fb7sd	/film/film/release_date_s./film/film_regional_release_date/film_release_distribution_medium	/m/029j_
/m/06wxw	/base/petbreeds/city_with_dogs/top_breeds./base/petbreeds/dog_city_relationship/dog_breed	/m/0km3f
/m/0p4wb	/base/schemastaging/organization_extra/phone_number./base/schemastaging/phone_sandbox/service_language	/m/01r2l
/m/09kr66	/people/ethnicity/people	/m/05bnp0
/m/0250f	/people/person/profession	/m/01d_h8
/m/04qp06	/award/award_nominee/award_nominations./award/award_nomination/award	/m/03rbj2
/m/0c01c	/award/award_winner/awards_won./award/award_honor/award_winner	/m/01x_d8
/m/0b1xl	/organization/organization/headquarters./location/mailing_address/state_province_region	/m/03v0t
/m/01c0cc	/education/educational_institution/students_graduates./education/education/major_field_of_study	/m/04_tv
/m/02w9sd7	/award/award_category/nominees./award/award_nomination/nominated_for	/m/0yx_w
/m/0187y5	/film/actor/film./film/performance/film	/m/02b6n9
/m/0fkhl	/location/us_county/county_seat	/m/01dljr
/m/05g3v	/american_football/football_team/current_roster./sports/sports_team_roster/position	/m/08ns5s
/m/0435vm	/film/film/produced_by	/m/05mvd62
/m/0dq_5	/business/job_title/people_with_this_title./business/employment_tenure/company	/m/0py9b
/m/026c1	/film/actor/film./film/performance/film	/m/0ch3qr1
/m/060c4	/organization/role/leaders./organization/leadership/organization	/m/01cf5
/m/01pj_5	/film/film/release_date_s./film/film_regional_release_date/film_release_distribution_medium	/m/029j_
/m/0dzlbx	/film/film/release_date_s./film/film_regional_release_date/film_release_region	/m/0d060g
/m/09gkx35	/film/film/release_date_s./film/film_regional_release_date/film_release_region	/m/01mjq
/m/0f1pyf	/sports/pro_athlete/teams./sports/sports_team_roster/team	/m/02b17f
/m/02bqn1	/government/legislative_session/members./government/government_position_held/legislative_sessions	/m/02bn_p
/m/0dtw1x	/film/film/release_date_s./film/film_regional_release_date/film_release_region	/m/059j2
/m/05pcn59	/award/award_category/nominees./award/award_nomination/nominated_for	/m/0hwpz
/m/02ywwy	/film/film/produced_by	/m/04pqqb
/m/056rgc	/people/person/place_of_birth	/m/02_286
/m/01v1ln	/award/award_winning_work/awards_won./award/award_honor/award	/m/02g2wv
/m/03cfjg	/award/award_winner/awards_won./award/award_honor/award_winner	/m/01l47f5
/m/07rlg	/olympics/olympic_sport/athletes./olympics/olympic_athlete_affiliation/country	/m/0345h
/m/03g90h	/film/film/release_date_s./film/film_regional_release_date/film_release_region	/m/0345h
/m/03_8r	/olympics/olympic_sport/athletes./olympics/olympic_athlete_affiliation/country	/m/056vv
/m/017s11	/film/film_distributor/films_distributed./film/film_film_distributor_relationship/film	/m/0830vk
/m/0bx0l	/film/film/edited_by	/m/027pdrh
/m/0jsf6	/award/award_nominated_work/award_nominations./award/award_nomination/nominated_for	/m/07g1sm
/m/01tntf	/education/educational_institution/students_graduates./education/education/major_field_of_study	/m/0fdys
/m/013w7j	/people/person/employment_history./business/employment_tenure/company	/m/01fb6d
/m/0bs8s1p	/film/film/genre	/m/01jfsb
/m/02kv5k	/people/person/place_of_birth	/m/01_d4
/m/0mz73	/award/award_nominee/award_nominations./award/award_nomination/award	/m/05pcn59
/m/04088s0	/sports/sports_team/colors	/m/083jv
/m/06wm0z	/base/popstra/celebrity/friendship./base/popstra/friendship/participant	/m/01cwkq
/m/04jn6y7	/film/film/production_companies	/m/0fvppk
/m/015p3p	/film/actor/film./film/performance/film	/m/067ghz
/m/01x6v6	/award/award_nominee/award_nominations./award/award_nomination/nominated_for	/m/0c0zq
/m/0cg9f	/film/actor/film./film/performance/film	/m/026fs38
/m/09krm_	/organization/organization/headquarters./location/mailing_address/citytown	/m/0f2nf
/m/0f04v	/travel/travel_destination/climate./travel/travel_destination_monthly_climate/month	/m/040fb
/m/02ndbd	/award/award_nominee/award_nominations./award/award_nomination/nominated_for	/m/0fphf3v
/m/03g90h	/film/film/release_date_s./film/film_regional_release_date/film_release_region	/m/06t8v
/m/01rdm0	/location/country/capital	/m/096gm
/m/043tvp3	/film/film/other_crew./film/film_crew_gig/film_crew_role	/m/094hwz
/m/027kp3	/education/educational_institution/colors	/m/04mkbj
/m/04crrxr	/award/award_nominee/award_nominations./award/award_nomination/award_nominee	/m/0bz5v2
/m/03r8v_	/award/award_category/winners./award/award_honor/award_winner	/m/02ctyy
/m/01vw8mh	/award/award_nominee/award_nominations./award/award_nomination/award_nominee	/m/0412f5y
/m/04192r	/business/job_title/people_with_this_title./business/employment_tenure/company	/m/0py9b
/m/0mmpm	/location/location/adjoin_s./location/adjoining_relationship/adjoins	/m/0mmpz
/m/02tk74	/people/person/spouse_s./people/marriage/spouse	/m/0h5g_
/m/064t9	/music/genre/artists	/m/01vrt_c
/m/01yg9y	/award/award_winner/awards_won./award/award_honor/award_winner	/m/06jw0s
/m/0b68vs	/music/artist/track_contributions./music/track_contribution/role	/m/042v_gx
/m/026670	/award/award_nominee/award_nominations./award/award_nomination/nominated_for	/m/02b6n9
/m/042fk	/government/politician/government_positions_held./government/government_position_held/legislative_sessions	/m/01gtcc
/m/07663r	/people/person/profession	/m/018gz8
/m/02t8gf	/music/genre/parent_genre	/m/0mmp3
/m/07c52	/media_common/netflix_genre/titles	/m/08bytj
/m/0kz10	/music/genre/parent_genre	/m/0mmp3
/m/02_h0	/film/film_subject/films	/m/095zlp
/m/069q4f	/award/award_winning_work/awards_won./award/award_honor/award	/m/05b4l5x
/m/05kwx2	/film/actor/film./film/performance/film	/m/04k9y6
/m/016ndm	/education/educational_institution/colors	/m/083jv
/m/02qcr	/film/film/genre	/m/0glj9q
/m/0b9dmk	/people/person/profession	/m/02jknp
/m/027j79k	/people/person/places_lived./people/place_lived/location	/m/01x73
/m/0fpv_3_	/film/film/release_date_s./film/film_regional_release_date/film_release_region	/m/03ryn
/m/013q0p	/film/film/genre	/m/02kdv5l
/m/03tn80	/film/film/genre	/m/01jfsb
/m/0bkf4	/award/award_nominee/award_nominations./award/award_nomination/award_nominee	/m/015mrk
/m/0bdw1g	/award/award_category/nominees./award/award_nomination/nominated_for	/m/01j67j
/m/016zdd	/people/person/place_of_birth	/m/02_286
/m/07ghq	/award/award_winning_work/awards_won./award/award_honor/award_winner	/m/03_gd
/m/01rtm4	/education/educational_institution/students_graduates./education/education/student	/m/05xpms
/m/02qcr	/film/film/genre	/m/02js9
/m/0dzlbx	/film/film/executive_produced_by	/m/01twdk
/m/07r1_	/music/artist/origin	/m/01_d4
/m/064lsn	/film/film/release_date_s./film/film_regional_release_date/film_release_region	/m/03_3d
/m/01cf5	/education/educational_institution/students_graduates./education/education/major_field_of_study	/m/0fdys
/m/0dvld	/award/award_nominee/award_nominations./award/award_nomination/award	/m/05pcn59
/m/01kv4mb	/award/award_winner/awards_won./award/award_honor/award_winner	/m/0bhvtc
/m/013knm	/award/award_winner/awards_won./award/award_honor/award_winner	/m/02__7n
/m/05fm6m	/film/film/production_companies	/m/017s11
/m/0ds3t5x	/award/award_winning_work/awards_won./award/award_honor/award	/m/02ppm4q
/m/03cbtlj	/award/award_winner/awards_won./award/award_honor/award_winner	/m/04x4s2
/m/02n9nmz	/award/award_category/nominees./award/award_nomination/nominated_for	/m/04cj79
/m/0ffgh	/base/popstra/celebrity/friendship./base/popstra/friendship/participant	/m/02lkcc
/m/02hsq3m	/award/award_category/nominees./award/award_nomination/nominated_for	/m/0hwpz
/m/04w_7	/base/localfood/seasonal_month/produce_available./base/localfood/produce_availability/seasonal_months	/m/06vkl
/m/0fbtbt	/award/award_category/nominees./award/award_nomination/nominated_for	/m/02rcwq0
/m/04mz10g	/award/award_nominee/award_nominations./award/award_nomination/award_nominee	/m/05wqr1
/m/0hn6d	/ice_hockey/hockey_team/current_roster./sports/sports_team_roster/position	/m/02qvzf
/m/0f3m1	/film/film/distributors./film/film_film_distributor_relationship/film_distribution_medium	/m/029j_
/m/01kv4mb	/award/award_winner/awards_won./award/award_honor/award_winner	/m/02fn5r
/m/057xs89	/award/award_category/nominees./award/award_nomination/nominated_for	/m/013q0p
/m/0309jm	/people/person/profession	/m/018gz8
/m/01cky2	/award/award_category/winners./award/award_honor/award_winner	/m/04xrx
/m/02h3d1	/award/award_category/winners./award/award_honor/award_winner	/m/0k7pf
/m/02jxbw	/film/film/genre	/m/02kdv5l
/m/05glrg	/sports/sports_team/sport	/m/02vx4
/m/025txtg	/sports/sports_team/sport	/m/02vx4
/m/0c4f4	/people/person/spouse_s./people/marriage/spouse	/m/0sw6g
/m/07_l6	/music/performance_role/regular_performances./music/group_membership/role	/m/05r5c
/m/0gd5z	/people/person/gender	/m/02zsn
/m/05bnp0	/film/actor/film./film/performance/film	/m/012s1d
/m/02mqc4	/award/award_nominee/award_nominations./award/award_nomination/award_nominee	/m/047c9l
/m/01gzm2	/people/person/profession	/m/02jknp
/m/024lt6	/film/film/release_date_s./film/film_regional_release_date/film_release_distribution_medium	/m/029j_
/m/07gql	/music/performance_role/regular_performances./music/group_membership/group	/m/0163m1
/m/06l22	/sports/sports_team/colors	/m/083jv
/m/06nrt	/location/location/adjoin_s./location/adjoining_relationship/adjoins	/m/04s7y
/m/049mql	/film/film/country	/m/059j2
/m/09rvwmy	/film/film/other_crew./film/film_crew_gig/film_crew_role	/m/02vs3x5
/m/0jsf6	/film/film/prequel	/m/07g1sm
/m/0g9zcgx	/award/award_nominee/award_nominations./award/award_nomination/award_nominee	/m/0cw67g
/m/04j_gs	/award/award_nominee/award_nominations./award/award_nomination/award_nominee	/m/03f0r5w
/m/0214km	/music/performance_role/track_performances./music/track_contribution/role	/m/026t6
/m/01pkhw	/film/actor/film./film/performance/film	/m/02vqsll
/m/01qgr3	/education/educational_institution/students_graduates./education/education/major_field_of_study	/m/0_jm
/m/02rzdcp	/award/award_winning_work/awards_won./award/award_honor/award_winner	/m/04gnbv1
/m/05b1610	/award/award_category/nominees./award/award_nomination/nominated_for	/m/0cn_b8
/m/01dpts	/award/award_nominee/award_nominations./award/award_nomination/award	/m/02x4wb
/m/05xvj	/sports/professional_sports_team/draft_picks./sports/sports_league_draft_pick/draft	/m/02z6872
/m/0qm98	/film/film/release_date_s./film/film_regional_release_date/film_release_distribution_medium	/m/029j_
/m/05xpms	/award/award_nominee/award_nominations./award/award_nomination/award_nominee	/m/0cnl09
/m/05szp	/award/award_nominee/award_nominations./award/award_nomination/award_nominee	/m/01my_c
/m/0c0k1	/base/popstra/celebrity/dated./base/popstra/dated/participant	/m/01k8rb
/m/03kxj2	/film/film/genre	/m/01hmnh
/m/07y9w5	/film/film/production_companies	/m/017s11
/m/0zjpz	/music/artist/track_contributions./music/track_contribution/role	/m/0214km
/m/0bdx29	/award/award_category/nominees./award/award_nomination/nominated_for	/m/0kfv9
/m/01tnxc	/award/award_nominee/award_nominations./award/award_nomination/award_nominee	/m/07h565
/m/04p0c	/base/aareas/schema/administrative_area/administrative_parent	/m/0345h
/m/042v_gx	/music/performance_role/track_performances./music/track_contribution/role	/m/0dwvl
/m/012s5j	/award/award_nominee/award_nominations./award/award_nomination/award	/m/05b4l5x
/m/019vv1	/education/educational_institution/school_type	/m/01jlsn
/m/02fn5r	/award/award_nominated_work/award_nominations./award/award_nomination/nominated_for	/m/0pmw9
/m/014bpd	/award/award_winning_work/awards_won./award/award_honor/award	/m/02qwdhq
/m/01x2tm8	/award/award_nominee/award_nominations./award/award_nomination/award	/m/03r8tl
/m/0gqng	/award/award_category/winners./award/award_honor/ceremony	/m/0fk0xk
/m/026n998	/award/award_nominee/award_nominations./award/award_nomination/award_nominee	/m/0265vcb
/m/0270k40	/film/film/genre	/m/01hmnh
/m/0bwfn	/education/educational_institution/students_graduates./education/education/student	/m/01n9d9
/m/064t9	/music/genre/parent_genre	/m/0ggq0m
/m/0gd0c7x	/film/film/release_date_s./film/film_regional_release_date/film_release_region	/m/0d0kn
/m/08hmch	/film/film/release_date_s./film/film_regional_release_date/film_release_region	/m/03h64
/m/0pz7h	/base/popstra/celebrity/dated./base/popstra/dated/participant	/m/026w_gk
/m/02fcs2	/people/person/profession	/m/02jknp
/m/0k7pf	/award/award_nominee/award_nominations./award/award_nomination/award	/m/02h3d1
/m/04q42	/base/biblioness/bibs_location/country	/m/059j2
/m/0gqzz	/award/award_category/nominees./award/award_nomination/nominated_for	/m/03x7hd
/m/0dzlbx	/film/film/release_date_s./film/film_regional_release_date/film_release_region	/m/07t21
/m/04mkft	/film/film_distributor/films_distributed./film/film_film_distributor_relationship/film	/m/01f8f7
/m/013w7j	/base/popstra/celebrity/friendship./base/popstra/friendship/participant	/m/0456xp
/m/0gjcrrw	/film/film/release_date_s./film/film_regional_release_date/film_release_region	/m/0d060g
/m/0d1w9	/film/film_subject/films	/m/0_b3d
/m/05ty4m	/film/actor/film./film/performance/film	/m/034qzw
/m/03bnv	/award/award_nominee/award_nominations./award/award_nomination/award_nominee	/m/03j24kf
/m/0345h	/location/location/adjoin_s./location/adjoining_relationship/adjoins	/m/0k6nt
/m/09q17	/media_common/netflix_genre/titles	/m/026mfbr
/m/03b78r	/award/award_nominee/award_nominations./award/award_nomination/award_nominee	/m/029_3
/m/043tvp3	/film/film/genre	/m/01jfsb
/m/01qnfc	/people/person/profession	/m/01d_h8
/m/03rx9	/people/person/places_lived./people/place_lived/location	/m/0cr3d
/m/0br1w	/people/person/places_lived./people/place_lived/location	/m/071vr
/m/05xvj	/baseball/baseball_team/team_stats./baseball/baseball_team_stats/season	/m/04110b0
/m/014zcr	/award/award_nominee/award_nominations./award/award_nomination/award	/m/02x4wr9
/m/0bxtg	/award/award_nominee/award_nominations./award/award_nomination/award	/m/0279c15
/m/0k1wz	/people/person/religion	/m/0kpl
/m/0161c2	/people/person/gender	/m/02zsn
/m/02114t	/base/popstra/celebrity/breakup./base/popstra/breakup/participant	/m/01g0jn
/m/0fqyc	/location/administrative_division/country	/m/059j2
/m/07bs0	/olympics/olympic_sport/athletes./olympics/olympic_athlete_affiliation/country	/m/07t21
/m/03m6t5	/base/americancomedy/celebrity_impressionist/celebrities_impersonated	/m/0cg9f
/m/0c9k8	/award/award_winning_work/awards_won./award/award_honor/award_winner	/m/09fb5
/m/0c4y8	/people/person/spouse_s./people/marriage/type_of_union	/m/01g63y
/m/01c99j	/award/award_category/winners./award/award_honor/award_winner	/m/0dzlk
/m/014g22	/award/award_nominee/award_nominations./award/award_nomination/nominated_for	/m/0ds3t5x
/m/0ggq0m	/music/genre/artists	/m/03zrp
/m/0j0k	/base/locations/continents/countries_within	/m/02lx0
/m/0b9dmk	/award/award_nominee/award_nominations./award/award_nomination/award_nominee	/m/05wqr1
/m/0151ns	/award/award_nominee/award_nominations./award/award_nomination/award	/m/05b4l5x
/m/01vrt_c	/award/award_nominee/award_nominations./award/award_nomination/award_nominee	/m/09hnb
/m/03r8v_	/award/award_category/winners./award/award_honor/award_winner	/m/06wvfq
/m/06jw0s	/people/person/gender	/m/02zsn
/m/019v9k	/education/educational_degree/people_with_this_degree./education/education/institution	/m/026m3y
/m/03d34x8	/award/award_winning_work/awards_won./award/award_honor/award_winner	/m/03y9ccy
/m/01d6g	/baseball/baseball_team/team_stats./baseball/baseball_team_stats/season	/m/03c6sl9
/m/0fpv_3_	/film/film/release_date_s./film/film_regional_release_date/film_release_region	/m/01mjq
/m/01rxyb	/film/film/release_date_s./film/film_regional_release_date/film_release_distribution_medium	/m/029j_
/m/011zf2	/award/award_nominee/award_nominations./award/award_nomination/award_nominee	/m/06fmdb
/m/09pj68	/award/award_ceremony/awards_presented./award/award_honor/award_winner	/m/0697kh
/m/0l6wj	/award/award_winner/awards_won./award/award_honor/award_winner	/m/017s11
/m/031778	/award/award_winning_work/awards_won./award/award_honor/honored_for	/m/01flv_
/m/0dln8jk	/film/film/release_date_s./film/film_regional_release_date/film_release_distribution_medium	/m/029j_
/m/01grnp	/government/legislative_session/members./government/government_position_held/legislative_sessions	/m/01grp0
/m/0kb3n	/award/award_nominee/award_nominations./award/award_nomination/nominated_for	/m/0dj0m5
/m/04hvw	/organization/organization_member/member_of./organization/organization_membership/organization	/m/041288
/m/06gp3f	/people/person/gender	/m/02zsn
/m/0kvgtf	/film/film/genre	/m/01hmnh
/m/06pvr	/location/location/contains	/m/0135g
/m/03cvv4	/film/actor/film./film/performance/film	/m/0bscw
/m/03r8tl	/award/award_category/winners./award/award_honor/award_winner	/m/021j72
/m/04f6hhm	/tv/tv_program/regular_cast./tv/regular_tv_appearance/actor	/m/022yb4
/m/01v3bn	/people/person/spouse_s./people/marriage/location_of_ceremony	/m/071vr
/m/01qgry	/music/artist/track_contributions./music/track_contribution/role	/m/05r5c
/m/017s11	/film/film_distributor/films_distributed./film/film_film_distributor_relationship/film	/m/0p_sc
/m/026t6	/music/instrument/instrumentalists	/m/020hh3
/m/0349s	/language/human_language/countries_spoken_in	/m/01mjq
/m/01jfsb	/media_common/netflix_genre/titles	/m/0fy34l
/m/096f8	/olympics/olympic_sport/athletes./olympics/olympic_athlete_affiliation/country	/m/0d060g
/m/035bcl	/film/film/other_crew./film/film_crew_gig/film_crew_role	/m/0263ycg
/m/02ppm4q	/award/award_category/winners./award/award_honor/award_winner	/m/01fwf1
/m/0g768	/music/record_label/artist	/m/04k05
/m/05lfwd	/tv/tv_program/program_creator	/m/06y9bd
/m/04pqqb	/award/award_nominee/award_nominations./award/award_nomination/award_nominee	/m/01tt43d
/m/03cd1q	/award/award_winner/awards_won./award/award_honor/award_winner	/m/01wbgdv
/m/0dq_5	/organization/role/leaders./organization/leadership/organization	/m/0k9ts
/m/012f86	/people/ethnicity/geographic_distribution	/m/07t21
/m/0p9sw	/award/award_category/winners./award/award_honor/award_winner	/m/021yc7p
/m/07s846j	/film/film/release_date_s./film/film_regional_release_date/film_release_region	/m/03h64
/m/0cbvg	/film/film_subject/films	/m/020fcn
/m/04mhbh	/film/actor/film./film/performance/film	/m/04k9y6
/m/040rmy	/film/film/language	/m/04h9h
/m/02rb607	/award/award_winning_work/awards_won./award/award_honor/award_winner	/m/041jlr
/m/03t22m	/music/performance_role/regular_performances./music/group_membership/role	/m/07gql
/m/09y20	/people/person/spouse_s./people/marriage/type_of_union	/m/01g63y
/m/056wb	/award/award_nominee/award_nominations./award/award_nomination/award_nominee	/m/03wbzp
/m/0cgzj	/award/award_nominee/award_nominations./award/award_nomination/award	/m/02grdc
/m/025n3p	/award/award_nominee/award_nominations./award/award_nomination/award_nominee	/m/078mgh
/m/0137g1	/people/person/spouse_s./people/marriage/type_of_union	/m/01g63y
/m/036px	/people/person/place_of_birth	/m/013kcv
/m/0ddfwj1	/film/film/release_date_s./film/film_regional_release_date/film_release_region	/m/0d060g
/m/015q1n	/education/educational_institution/students_graduates./education/education/major_field_of_study	/m/01mkq
/m/01vxxb	/award/award_nominee/award_nominations./award/award_nomination/award_nominee	/m/0dvld
/m/026c1	/award/award_nominee/award_nominations./award/award_nomination/award	/m/05b4l5x
/m/02ctyy	/award/award_nominee/award_nominations./award/award_nomination/award	/m/03r8v_
/m/0308kx	/award/award_nominee/award_nominations./award/award_nomination/award_nominee	/m/058ncz
/m/02x4sn8	/award/award_category/nominees./award/award_nomination/nominated_for	/m/0bmhvpr
/m/014zcr	/film/actor/film./film/performance/film	/m/0bmhvpr
/m/03s0w	/location/location/contains	/m/02j3w
/m/05bnp0	/award/award_nominee/award_nominations./award/award_nomination/award	/m/04ljl_l
/m/01k8rb	/people/person/place_of_birth	/m/02d6c
/m/064t9	/music/genre/artists	/m/01vwbts
/m/01vsn38	/people/person/profession	/m/01d_h8
/m/02mxbd	/people/person/profession	/m/026sdt1
/m/05c1t6z	/award/award_ceremony/awards_presented./award/award_honor/honored_for	/m/04xbq3
/m/0c4f4	/film/actor/film./film/performance/film	/m/011yn5
/m/0ddj0x	/film/film/release_date_s./film/film_regional_release_date/film_release_region	/m/03_3d
/m/07gyv	/olympics/olympic_sport/athletes./olympics/olympic_athlete_affiliation/country	/m/07t_x
/m/026spg	/film/actor/film./film/performance/film	/m/03hfmm
/m/04cv9m	/film/film/country	/m/0345h
/m/028r4y	/award/award_winner/awards_won./award/award_honor/award_winner	/m/01tnxc
/m/0bwfn	/education/educational_institution/students_graduates./education/education/student	/m/01wjrn
/m/0bwfn	/education/educational_institution/students_graduates./education/education/student	/m/016732
/m/03b_fm5	/film/film/country	/m/0345h
/m/02f4s3	/education/educational_institution/students_graduates./education/education/major_field_of_study	/m/01mkq
/m/029jt9	/film/film/release_date_s./film/film_regional_release_date/film_release_distribution_medium	/m/029j_
/m/031778	/film/film/release_date_s./film/film_regional_release_date/film_release_distribution_medium	/m/029j_
/m/028n3	/base/aareas/schema/administrative_area/capital	/m/02m__
/m/06tp4h	/people/person/profession	/m/01xr66
/m/0pmpl	/base/biblioness/bibs_location/country	/m/0d060g
/m/034qmv	/film/film/executive_produced_by	/m/012d40
/m/09lcsj	/film/film/genre	/m/04xvlr
/m/01grr2	/government/legislative_session/members./government/government_position_held/legislative_sessions	/m/01grp0
/m/05r6t	/music/genre/artists	/m/03xl77
/m/07gbf	/tv/tv_program/regular_cast./tv/regular_tv_appearance/actor	/m/01k8rb
/m/05qdh	/education/field_of_study/students_majoring./education/education/student	/m/0gs1_
/m/07bdd_	/award/award_category/nominees./award/award_nomination/nominated_for	/m/074rg9
/m/07m77x	/award/award_nominee/award_nominations./award/award_nomination/award_nominee	/m/05ztm4r
/m/01ky2h	/people/person/place_of_birth	/m/02_286
/m/0kfv9	/award/award_winning_work/awards_won./award/award_honor/award_winner	/m/04x4s2
/m/05b1610	/award/award_category/nominees./award/award_nomination/nominated_for	/m/09y6pb
/m/0xv2x	/music/genre/artists	/m/016lmg
/m/0ggq0m	/music/genre/artists	/m/0k7pf
/m/0l6px	/award/award_winner/awards_won./award/award_honor/award_winner	/m/01hkhq
/m/015d3h	/film/actor/film./film/performance/film	/m/0bscw
/m/0721cy	/award/award_nominee/award_nominations./award/award_nomination/award	/m/0fc9js
/m/0f6c3	/government/government_office_category/officeholders./government/government_position_held/jurisdiction_of_office	/m/03s0w
/m/0d02km	/award/award_nominee/award_nominations./award/award_nomination/award_nominee	/m/05qg6g
/m/042v_gx	/music/performance_role/regular_performances./music/group_membership/role	/m/026t6
/m/0bl5c	/film/film/genre	/m/01g6gs
/m/09fb5	/award/award_nominee/award_nominations./award/award_nomination/nominated_for	/m/0296rz
/m/01wy6	/music/performance_role/track_performances./music/track_contribution/role	/m/07_l6
/m/04wp63	/award/award_winner/awards_won./award/award_honor/award_winner	/m/09dvgb8
/m/01trxd	/education/educational_institution/students_graduates./education/education/major_field_of_study	/m/01mkq
/m/05tbn	/location/location/contains	/m/0fvzz
/m/02w0dc0	/award/award_nominee/award_nominations./award/award_nomination/nominated_for	/m/02q5g1z
/m/0gy30w	/film/film/genre	/m/01jfsb
/m/03cfjg	/award/award_nominee/award_nominations./award/award_nomination/award_nominee	/m/01ww2fs
/m/03wbzp	/people/person/profession	/m/01d_h8
/m/014635	/people/person/profession	/m/0d8qb
/m/0199wf	/tv/tv_program/regular_cast./tv/regular_tv_appearance/actor	/m/015qt5
/m/05kwx2	/award/award_winner/awards_won./award/award_honor/award_winner	/m/0170pk
/m/067ghz	/film/film/release_date_s./film/film_regional_release_date/film_release_region	/m/03h64
/m/039x1k	/award/award_nominee/award_nominations./award/award_nomination/nominated_for	/m/0c9k8
/m/02kxg_	/military/military_conflict/combatants./military/military_combatant_group/combatants	/m/01rdm0
/m/01cj6y	/award/award_nominee/award_nominations./award/award_nomination/award_nominee	/m/01pkhw
/m/01_xtx	/people/person/profession	/m/01d_h8
/m/07jjt	/olympics/olympic_sport/athletes./olympics/olympic_athlete_affiliation/country	/m/059j2
/m/05szp	/award/award_nominee/award_nominations./award/award_nomination/award	/m/01c99j
/m/0l6m5	/olympics/olympic_games/sports	/m/02bkg
/m/03_gd	/people/person/profession	/m/01d_h8
/m/01vsnff	/music/artist/track_contributions./music/track_contribution/role	/m/0dwsp
/m/012z8_	/music/artist/track_contributions./music/track_contribution/role	/m/05r5c
/m/028dcg	/education/educational_degree/people_with_this_degree./education/education/institution	/m/02zccd
/m/013q0p	/film/film/music	/m/01wd9lv
/m/06pr6	/location/location/contains	/m/02_gzx
/m/0dj75	/food/food/nutrients./food/nutrition_fact/nutrient	/m/0h1yy
/m/03bxwtd	/award/award_nominee/award_nominations./award/award_nomination/award_nominee	/m/0412f5y
/m/05pd94v	/award/award_ceremony/awards_presented./award/award_honor/award_winner	/m/016m5c
/m/043q4d	/tv/non_character_role/tv_regular_personal_appearances./tv/tv_regular_personal_appearance/person	/m/0261x8t
/m/026c1	/film/actor/film./film/performance/film	/m/0ds2l81
/m/02gl58	/tv/tv_program/genre	/m/01hmnh
/m/0g51l1	/people/person/places_lived./people/place_lived/location	/m/02_286
/m/09qs08	/award/award_category/nominees./award/award_nomination/nominated_for	/m/01fszq
/m/015mrk	/award/award_winner/awards_won./award/award_honor/award_winner	/m/016732
/m/026ps1	/award/award_winner/awards_won./award/award_honor/award_winner	/m/011zf2
/m/02lnbg	/music/genre/artists	/m/09889g
/m/07c52	/media_common/netflix_genre/titles	/m/05pbsry
/m/03wpmd	/people/person/profession	/m/01d_h8
/m/04xvlr	/media_common/netflix_genre/titles	/m/042y1c
/m/02x_h0	/award/award_nominee/award_nominations./award/award_nomination/award_nominee	/m/0770cd
/m/09889g	/influence/influence_node/peers./influence/peer_relationship/peers	/m/03j24kf
/m/09k56b7	/film/film/release_date_s./film/film_regional_release_date/film_release_region	/m/0d0kn
/m/0cqh6z	/award/award_category/winners./award/award_honor/award_winner	/m/03d_w3h
/m/02qpt1w	/award/award_winning_work/awards_won./award/award_honor/award_winner	/m/081lh
/m/05r5c	/music/instrument/instrumentalists	/m/0bdlj
/m/05kwx2	/award/award_nominee/award_nominations./award/award_nomination/award_nominee	/m/0170pk
/m/09k0f	/people/person/profession	/m/04gc2
/m/07gql	/music/performance_role/track_performances./music/track_contribution/role	/m/026t6
/m/02h3d1	/award/award_category/winners./award/award_honor/award_winner	/m/0417z2
/m/067ghz	/film/film/release_date_s./film/film_regional_release_date/film_release_distribution_medium	/m/029j_
/m/051wwp	/award/award_winner/awards_won./award/award_honor/award_winner	/m/06j8wx
/m/0dq_5	/organization/role/leaders./organization/leadership/organization	/m/01yx7f
/m/016pns	/award/award_nominee/award_nominations./award/award_nomination/award	/m/023vrq
/m/0krdk	/business/job_title/people_with_this_title./business/employment_tenure/company	/m/0z90c
/m/016fjj	/award/award_nominee/award_nominations./award/award_nomination/award_nominee	/m/042ly5
/m/02r9p0c	/film/film/genre	/m/02kdv5l
/m/031f_m	/film/film/dubbing_performances./film/dubbing_performance/actor	/m/01x_d8
/m/0dq_5	/business/job_title/people_with_this_title./business/employment_tenure/company	/m/0gvbw
/m/07m77x	/film/actor/film./film/performance/film	/m/0416y94
/m/0794g	/base/popstra/celebrity/friendship./base/popstra/friendship/participant	/m/02mjf2
/m/015f7	/award/award_nominee/award_nominations./award/award_nomination/award	/m/05b4l5x
/m/03g90h	/film/film/release_date_s./film/film_regional_release_date/film_release_region	/m/05sb1
/m/0bhvtc	/award/award_nominated_work/award_nominations./award/award_nomination/nominated_for	/m/03cfjg
/m/060c4	/organization/role/leaders./organization/leadership/organization	/m/02bhj4
/m/032xhg	/film/actor/film./film/performance/film	/m/02x2jl_
/m/0p9sw	/award/award_category/nominees./award/award_nomination/nominated_for	/m/01kf4tt
/m/051wwp	/award/award_winner/awards_won./award/award_honor/award_winner	/m/01hkhq
/m/0d04z6	/olympics/olympic_participating_country/medals_won./olympics/olympic_medal_honor/olympics	/m/018wrk
/m/01csqg	/education/educational_institution/students_graduates./education/education/major_field_of_study	/m/05qjt
/m/01d38t	/award/award_category/winners./award/award_honor/ceremony	/m/02rjjll
/m/03t22m	/music/instrument/instrumentalists	/m/01ky2h
/m/063b4k	/film/director/film	/m/091z_p
/m/012vd6	/music/artist/track_contributions./music/track_contribution/role	/m/05r5c
/m/060c4	/organization/role/leaders./organization/leadership/organization	/m/0bwfn
/m/05l71	/sports/sports_team/roster./american_football/football_historical_roster_position/position_s	/m/01r3hr
/m/031f_m	/film/film/genre	/m/01jfsb
/m/02vx4	/sports/sport/pro_athletes./sports/pro_sports_played/athlete	/m/0g9zjp
/m/0fb7sd	/film/film/country	/m/0345h
/m/0151b0	/music/performance_role/regular_performances./music/group_membership/role	/m/03qmg1
/m/05qfh	/education/field_of_study/students_majoring./education/education/student	/m/016kjs
/m/06mzp	/location/country/official_language	/m/02bjrlw
/m/070mff	/government/legislative_session/members./government/government_position_held/district_represented	/m/02xry
/m/016sp_	/award/award_nominee/award_nominations./award/award_nomination/award_nominee	/m/02cx90
/m/04xvlr	/media_common/netflix_genre/titles	/m/0353xq
/m/02w7fs	/award/award_category/winners./award/award_honor/ceremony	/m/01c6qp
/m/057_yx	/film/actor/film./film/performance/film	/m/047csmy
/m/02x4sn8	/award/award_category/nominees./award/award_nomination/nominated_for	/m/0320fn
/m/01gb54	/award/award_nominee/award_nominations./award/award_nomination/award_nominee	/m/016dmx
/m/06w99h3	/film/film/release_date_s./film/film_regional_release_date/film_release_distribution_medium	/m/029j_
/m/0dq_5	/business/job_title/people_with_this_title./business/employment_tenure/company	/m/0300cp
/m/014vk4	/award/award_winner/awards_won./award/award_honor/award_winner	/m/09b6zr
/m/027nb	/organization/organization_member/member_of./organization/organization_membership/organization	/m/041288
/m/0bc773	/award/award_ceremony/awards_presented./award/award_honor/award_winner	/m/09hnb
/m/07m77x	/award/award_nominee/award_nominations./award/award_nomination/award_nominee	/m/051wwp
/m/0b9rdk	/film/film/costume_design_by	/m/03qhyn8
/m/03_8r	/olympics/olympic_sport/athletes./olympics/olympic_athlete_affiliation/country	/m/01nln
/m/0260bz	/award/award_winning_work/awards_won./award/award_honor/award_winner	/m/016dmx
/m/01k8rb	/people/person/gender	/m/02zsn
/m/01pv91	/award/award_winning_work/awards_won./award/award_honor/award_winner	/m/01gb54
/m/02rjjll	/award/award_ceremony/awards_presented./award/award_honor/award_winner	/m/03gr7w
/m/016zp5	/award/award_winner/awards_won./award/award_honor/award_winner	/m/02gvwz
/m/0sw6g	/award/award_nominee/award_nominations./award/award_nomination/award	/m/0bdw6t
/m/0191n	/award/award_winning_work/awards_won./award/award_honor/award_winner	/m/02fn5
/m/01wgxtl	/base/popstra/celebrity/friendship./base/popstra/friendship/participant	/m/04xrx
/m/03f4k	/people/person/sibling_s./people/sibling_relationship/sibling	/m/03zrp
/m/0hvb2	/award/award_nominee/award_nominations./award/award_nomination/nominated_for	/m/01vnbh
/m/02zs4	/business/business_operation/industry	/m/0k4j
/m/0d060g	/location/location/contains	/m/01gb_p
/m/053vcrp	/film/film_set_designer/film_sets_designed	/m/04v8x9
/m/024rdh	/film/film_distributor/films_distributed./film/film_film_distributor_relationship/film	/m/0cmc26r
/m/0dwsp	/music/instrument/instrumentalists	/m/01vsnff
/m/0205dx	/award/award_nominee/award_nominations./award/award_nomination/award	/m/02w9sd7
/m/0lzkm	/music/artist/origin	/m/01_d4
/m/02_286	/travel/travel_destination/climate./travel/travel_destination_monthly_climate/month	/m/06vkl
/m/020fcn	/award/award_winning_work/awards_won./award/award_honor/award	/m/018wdw
/m/02114t	/film/actor/film./film/performance/film	/m/01jzyf
/m/03qbnj	/award/award_category/winners./award/award_honor/award_winner	/m/016732
/m/0cxn2	/food/food/nutrients./food/nutrition_fact/nutrient	/m/02kc5rj
/m/0ds33	/film/film/genre	/m/01jfsb
/m/03mg35	/award/award_nominee/award_nominations./award/award_nomination/award	/m/02w9sd7
/m/0cmf0m0	/film/film/release_date_s./film/film_regional_release_date/film_release_region	/m/07t21
/m/06by7	/music/genre/artists	/m/032nwy
/m/01bx35	/award/award_ceremony/awards_presented./award/award_honor/award_winner	/m/01x6v6
/m/02hsq3m	/award/award_category/nominees./award/award_nomination/nominated_for	/m/020fcn
/m/07w6r	/education/educational_institution/students_graduates./education/education/major_field_of_study	/m/05qjt
/m/04gnbv1	/tv/tv_producer/programs_produced./tv/tv_producer_term/program	/m/02rzdcp
/m/028mc6	/people/person/place_of_birth	/m/013kcv
/m/027vps	/people/person/places_lived./people/place_lived/location	/m/05tbn
/m/070bjw	/award/award_nominee/award_nominations./award/award_nomination/award_nominee	/m/06hzsx
/m/0gvvm6l	/film/film/country	/m/0345h
/m/03459x	/film/film/genre	/m/02kdv5l
/m/05nlx4	/film/film/genre	/m/03k9fj
/m/043kzcr	/award/award_nominee/award_nominations./award/award_nomination/nominated_for	/m/0ds3t5x
/m/0kst7v	/people/person/languages	/m/03k50
/m/0bxtg	/award/award_nominee/award_nominations./award/award_nomination/award_nominee	/m/02d4ct
/m/05148p4	/music/performance_role/regular_performances./music/group_membership/role	/m/0j871
/m/0dq23	/business/business_operation/industry	/m/019mlh
/m/0cc8l6d	/award/award_category/winners./award/award_honor/award_winner	/m/06jrhz
/m/07h565	/award/award_winner/awards_won./award/award_honor/award_winner	/m/013knm
/m/060c4	/organization/role/leaders./organization/leadership/organization	/m/0q19t
/m/04xrx	/award/award_nominee/award_nominations./award/award_nomination/award	/m/01c99j
/m/08m4c8	/people/person/places_lived./people/place_lived/location	/m/02_286
/m/0bkq7	/film/film/genre	/m/01g6gs
/m/028q6	/music/group_member/membership./music/group_membership/role	/m/05r5c
/m/02grdc	/award/award_category/winners./award/award_honor/ceremony	/m/01c6qp
/m/09pj68	/award/award_ceremony/awards_presented./award/award_honor/award_winner	/m/014x77
/m/05qzv	/influence/influence_node/influenced_by	/m/032l1
/m/015pdg	/music/genre/artists	/m/03gr7w
/m/05cgy8	/people/person/profession	/m/0dgd_
/m/015n8	/people/deceased_person/place_of_death	/m/07g0_
/m/01f7v_	/film/director/film	/m/01f8f7
/m/0fpgp26	/film/film/genre	/m/03k9fj
/m/0c3xw46	/film/film/release_date_s./film/film_regional_release_date/film_release_region	/m/06mzp
/m/026dd2b	/award/award_nominee/award_nominations./award/award_nomination/nominated_for	/m/0gj50
/m/03wpmd	/award/award_winner/awards_won./award/award_honor/award_winner	/m/0cbxl0
/m/0bwfn	/education/educational_institution/students_graduates./education/education/student	/m/0892sx
/m/01wyy_	/people/person/place_of_birth	/m/06wxw
/m/01l1rw	/people/person/place_of_birth	/m/02_286
/m/014zcr	/award/award_nominee/award_nominations./award/award_nomination/nominated_for	/m/029k4p
/m/06w7v	/music/performance_role/regular_performances./music/group_membership/role	/m/05148p4
/m/059t8	/location/location/contains	/m/02dj3
/m/05jcn8	/award/award_nominee/award_nominations./award/award_nomination/nominated_for	/m/027s39y
/m/01g0jn	/base/popstra/celebrity/breakup./base/popstra/breakup/participant	/m/02114t
/m/034x61	/award/award_winner/awards_won./award/award_honor/award_winner	/m/0k2mxq
/m/02lnbg	/music/genre/artists	/m/05szp
/m/018cqq	/user/ktrueman/default_domain/international_organization/member_states	/m/0d060g
/m/0b_6xf	/time/event/locations	/m/0lhql
/m/012d40	/people/person/nationality	/m/03h64
/m/018wdw	/award/award_category/nominees./award/award_nomination/nominated_for	/m/072r5v
/m/02zd460	/education/educational_institution/students_graduates./education/education/student	/m/02cg2v
/m/0jzw	/award/ranked_item/appears_in_ranked_lists./award/ranking/list	/m/05glt
/m/02ppm4q	/award/award_category/winners./award/award_honor/award_winner	/m/0dvld
/m/0jyb4	/film/film/release_date_s./film/film_regional_release_date/film_release_region	/m/0k6nt
/m/01r6jt2	/award/award_winner/awards_won./award/award_honor/award_winner	/m/01vvdm
/m/064t9	/music/genre/artists	/m/018gqj
/m/0kfv9	/award/award_winning_work/awards_won./award/award_honor/award_winner	/m/03cbtlj
/m/0bx0l	/film/film/genre	/m/03k9fj
/m/015ppk	/award/award_winning_work/awards_won./award/award_honor/award	/m/0gkts9
/m/0347xl	/award/award_nominee/award_nominations./award/award_nomination/award	/m/0bdx29
/m/0gr42	/award/award_category/winners./award/award_honor/ceremony	/m/0fzrhn
/m/0cjyzs	/award/award_category/nominees./award/award_nomination/nominated_for	/m/02czd5
/m/09fb5	/film/actor/film./film/performance/film	/m/0c9k8
/m/054knh	/award/award_category/nominees./award/award_nomination/nominated_for	/m/02gd6x
/m/01_bp	/business/business_operation/industry	/m/0k4j
/m/07g1sm	/award/award_winning_work/awards_won./award/award_honor/award_winner	/m/0kb3n
/m/0155w	/music/genre/artists	/m/0137n0
/m/071ynp	/film/actor/film./film/performance/film	/m/031778
/m/04xrx	/award/award_nominee/award_nominations./award/award_nomination/award_nominee	/m/0c33pl
/m/047rkcm	/film/film/release_date_s./film/film_regional_release_date/film_release_distribution_medium	/m/029j_
/m/02pv_d	/award/award_nominee/award_nominations./award/award_nomination/award	/m/02n9nmz
/m/01rv7x	/people/ethnicity/languages_spoken	/m/07c9s
/m/017s11	/film/film_distributor/films_distributed./film/film_film_distributor_relationship/film	/m/014bpd
/m/060c4	/business/job_title/people_with_this_title./business/employment_tenure/company	/m/0lyjf
/m/016ywr	/award/award_nominee/award_nominations./award/award_nomination/award	/m/05pcn59
/m/03mv0b	/people/person/profession	/m/02jknp
/m/02s9vc	/base/x2010fifaworldcupsouthafrica/world_cup_squad/current_world_cup_squad./base/x2010fifaworldcupsouthafrica/current_world_cup_squad/current_club	/m/0mmd6
/m/02yxjs	/education/educational_institution/students_graduates./education/education/major_field_of_study	/m/01mkq
/m/0c3p7	/people/person/spouse_s./people/marriage/type_of_union	/m/01g63y
/m/05b1610	/award/award_category/nominees./award/award_nomination/nominated_for	/m/03459x
/m/02404v	/award/award_nominee/award_nominations./award/award_nomination/nominated_for	/m/01f8f7
/m/0cmf0m0	/film/film/prequel	/m/02qydsh
/m/01vvlyt	/award/award_nominee/award_nominations./award/award_nomination/award	/m/031b3h
/m/0gq_v	/award/award_category/nominees./award/award_nomination/nominated_for	/m/02ll45
/m/03_3d	/location/location/contains	/m/017lvd
/m/016sp_	/award/award_nominee/award_nominations./award/award_nomination/award_nominee	/m/034zc0
/m/045c66	/film/actor/film./film/performance/film	/m/0bmch_x
/m/02y74	/olympics/olympic_sport/athletes./olympics/olympic_athlete_affiliation/olympics	/m/0kbvb
/m/01f7j9	/film/director/film	/m/0hgnl3t
/m/0b_6lb	/base/marchmadness/ncaa_basketball_tournament/seeds./base/marchmadness/ncaa_tournament_seed/team	/m/02py8_w
/m/0214km	/music/performance_role/track_performances./music/track_contribution/role	/m/06w7v
/m/096f8	/olympics/olympic_sport/athletes./olympics/olympic_athlete_affiliation/country	/m/0jhd
/m/0p9sw	/award/award_category/nominees./award/award_nomination/nominated_for	/m/020fcn
/m/07nnp_	/film/film/release_date_s./film/film_regional_release_date/film_release_distribution_medium	/m/029j_
/m/03_8r	/olympics/olympic_sport/athletes./olympics/olympic_athlete_affiliation/country	/m/03ryn
/m/06x58	/award/award_nominee/award_nominations./award/award_nomination/award	/m/05b4l5x
/m/02x4sn8	/award/award_category/nominees./award/award_nomination/nominated_for	/m/02qpt1w
/m/01f7j9	/film/director/film	/m/02vqhv0
/m/033gn8	/education/educational_institution/students_graduates./education/education/student	/m/02d4ct
/m/02fcs2	/award/award_nominee/award_nominations./award/award_nomination/award	/m/02n9nmz
/m/0436f4	/people/person/places_lived./people/place_lived/location	/m/0yc84
/m/065b6q	/people/ethnicity/languages_spoken	/m/06mp7
/m/0bz6sq	/film/film/production_companies	/m/017s11
/m/02y74	/olympics/olympic_sport/athletes./olympics/olympic_athlete_affiliation/country	/m/05sb1
/m/02661h	/award/award_nominee/award_nominations./award/award_nomination/award	/m/09qrn4
/m/016zdd	/film/actor/film./film/performance/film	/m/07sp4l
/m/0dvld	/award/award_nominee/award_nominations./award/award_nomination/award_nominee	/m/01vxxb
/m/03ftmg	/influence/influence_node/influenced_by	/m/0j_c
/m/03bnv	/award/award_winner/awards_won./award/award_honor/award_winner	/m/01vrncs
/m/02qvl7	/sports/sports_position/players./sports/sports_team_roster/team	/m/0hn6d
/m/01wy6	/music/performance_role/regular_performances./music/group_membership/role	/m/07xzm
/m/031b3h	/award/award_category/winners./award/award_honor/ceremony	/m/01c6qp
/m/051wwp	/award/award_nominee/award_nominations./award/award_nomination/award_nominee	/m/0l6px
/m/09gq0x5	/award/award_winning_work/awards_won./award/award_honor/award_winner	/m/016gr2
/m/01w9mnm	/music/artist/track_contributions./music/track_contribution/role	/m/05r5c
/m/02z1yj	/base/popstra/celebrity/dated./base/popstra/dated/participant	/m/026r8q
/m/02qsfzv	/award/award_category/nominees./award/award_nomination/nominated_for	/m/0cmc26r
/m/043tvp3	/film/film/genre	/m/02kdv5l
/m/0gj9tn5	/film/film/release_date_s./film/film_regional_release_date/film_release_region	/m/047lj
/m/0170pk	/film/actor/film./film/performance/film	/m/06nr2h
/m/056878	/award/award_ceremony/awards_presented./award/award_honor/award_winner	/m/0lzkm
/m/05sq20	/award/award_nominee/award_nominations./award/award_nomination/award_nominee	/m/016qtt
/m/09krm_	/organization/organization/headquarters./location/mailing_address/state_province_region	/m/01x73
/m/0c_gcr	/award/award_nominee/award_nominations./award/award_nomination/nominated_for	/m/04qw17
/m/0b9dmk	/award/award_winner/awards_won./award/award_honor/award_winner	/m/04mz10g
/m/0gd_b_	/award/award_winner/awards_won./award/award_honor/award_winner	/m/0d810y
/m/02x4wb	/award/award_category/winners./award/award_honor/award_winner	/m/0b1hw
/m/02lgj6	/people/person/place_of_birth	/m/0cr3d
/m/02lfcm	/people/person/profession	/m/01d_h8
/m/09d28z	/award/award_category/winners./award/award_honor/award_winner	/m/02pv_d
/m/057dxsg	/award/award_nominee/award_nominations./award/award_nomination/nominated_for	/m/04vq33
/m/059gkk	/award/award_nominee/award_nominations./award/award_nomination/award_nominee	/m/02lg9w
/m/01jc6q	/award/ranked_item/appears_in_ranked_lists./award/ranking/list	/m/05glt
/m/09dvgb8	/award/award_nominee/award_nominations./award/award_nomination/award	/m/0p9sw
/m/0dwvl	/music/performance_role/track_performances./music/track_contribution/role	/m/03qmg1
/m/0288zy	/organization/organization/headquarters./location/mailing_address/citytown	/m/0dc95
/m/089j8p	/film/film/release_date_s./film/film_regional_release_date/film_release_distribution_medium	/m/029j_
/m/01wv9p	/music/artist/origin	/m/0cc56
/m/08ns5s	/sports/sports_position/players./sports/sports_team_roster/team	/m/05g3v
/m/03r8tl	/award/award_category/nominees./award/award_nomination/nominated_for	/m/0f42nz
/m/0d060g	/location/location/contains	/m/02dj3
/m/0278x6s	/award/award_winner/awards_won./award/award_honor/award_winner	/m/0170qf
/m/0221zw	/award/award_winning_work/awards_won./award/award_honor/award	/m/02x4wr9
/m/05q4y12	/film/film/release_date_s./film/film_regional_release_date/film_release_region	/m/0345h
/m/0cjyzs	/award/award_category/nominees./award/award_nomination/nominated_for	/m/01lv85
/m/0d0vj4	/people/person/employment_history./business/employment_tenure/company	/m/07y0n
/m/01m1dzc	/music/artist/track_contributions./music/track_contribution/role	/m/042v_gx
/m/02czd5	/award/award_winning_work/awards_won./award/award_honor/award_winner	/m/05gnf
/m/08xvpn	/film/film/produced_by	/m/01wd9lv
/m/019dmc	/people/cause_of_death/people	/m/0cf_h9
/m/02r251z	/award/award_nominee/award_nominations./award/award_nomination/award	/m/07bdd_
/m/016k6x	/film/actor/film./film/performance/film	/m/0ch26b_
/m/017drs	/sports/sports_position/players./sports/sports_team_roster/team	/m/05xvj
/m/02px_23	/sports/sports_team/roster./american_football/football_historical_roster_position/position_s	/m/01r3hr
/m/02rjjll	/award/award_ceremony/awards_presented./award/award_honor/award_winner	/m/0k7pf
/m/02lkcc	/base/popstra/celebrity/friendship./base/popstra/friendship/participant	/m/0ffgh
/m/027pdrh	/people/person/gender	/m/02zsn
/m/07147	/sports/professional_sports_team/draft_picks./sports/sports_league_draft_pick/school	/m/012vwb
/m/0416y94	/film/film/release_date_s./film/film_regional_release_date/film_release_distribution_medium	/m/029j_
/m/026n047	/people/person/profession	/m/0gl2ny2
/m/058frd	/award/award_nominee/award_nominations./award/award_nomination/nominated_for	/m/02r1ysd
/m/05v1sb	/award/award_winner/awards_won./award/award_honor/award_winner	/m/051z6mv
/m/028knk	/award/award_nominee/award_nominations./award/award_nomination/award	/m/0cqgl9
/m/0h69c	/sports/sports_league/teams./sports/sports_league_participation/team	/m/07147
/m/044n3h	/award/award_winner/awards_won./award/award_honor/award_winner	/m/01kwld
/m/02r1ysd	/tv/tv_program/genre	/m/01hmnh
/m/0pmhf	/award/award_nominee/award_nominations./award/award_nomination/nominated_for	/m/0hgnl3t
/m/09y20	/award/award_nominee/award_nominations./award/award_nomination/award	/m/057xs89
/m/018phr	/people/person/gender	/m/02zsn
/m/0892sx	/base/popstra/celebrity/dated./base/popstra/dated/participant	/m/078jnn
/m/02r_pp	/film/film/music	/m/015wc0
/m/0k9p4	/travel/travel_destination/how_to_get_here./travel/transportation/mode_of_transportation	/m/025t3bg
/m/0hvb2	/film/actor/film./film/performance/film	/m/078mm1
/m/016srn	/award/award_nominee/award_nominations./award/award_nomination/award_nominee	/m/01lmj3q
/m/0181dw	/music/record_label/artist	/m/02qsjt
/m/06x58	/film/actor/film./film/performance/film	/m/029k4p
/m/01cwkq	/award/award_nominee/award_nominations./award/award_nomination/award_nominee	/m/016fjj
/m/0604m	/location/location/contains	/m/082pc
/m/01j5ts	/award/award_nominee/award_nominations./award/award_nomination/award_nominee	/m/01f7dd
/m/01gwck	/education/educational_institution/students_graduates./education/education/major_field_of_study	/m/040p_q
/m/03t22m	/music/performance_role/track_performances./music/track_contribution/role	/m/01wy6
/m/017g21	/music/group_member/membership./music/group_membership/group	/m/01wv9xn
/m/01gb54	/award/award_nominee/award_nominations./award/award_nomination/award_nominee	/m/05mvd62
/m/04xbq3	/tv/tv_program/regular_cast./tv/regular_tv_appearance/actor	/m/02d4ct
/m/049qx	/people/person/profession	/m/01d_h8
/m/04shbh	/film/actor/film./film/performance/film	/m/072x7s
/m/044rvb	/film/actor/film./film/performance/film	/m/06_x996
/m/0214km	/music/performance_role/track_performances./music/track_contribution/role	/m/02hrlh
/m/0d3fdn	/sports/sports_team/sport	/m/02vx4
/m/02jxbw	/award/award_winning_work/awards_won./award/award_honor/award_winner	/m/0pmhf
/m/0n5d1	/location/location/adjoin_s./location/adjoining_relationship/adjoins	/m/0n5df
/m/016fjj	/film/actor/film./film/performance/film	/m/01flv_
/m/01k53x	/people/person/gender	/m/02zsn
/m/071fb	/language/human_language/countries_spoken_in	/m/088xp
/m/026bfsh	/tv/tv_program/regular_cast./tv/regular_tv_appearance/actor	/m/01dbgw
/m/07sp4l	/film/film/genre	/m/02kdv5l
/m/064t9	/music/genre/artists	/m/09mq4m
/m/07phbc	/film/film/genre	/m/09q17
/m/06by7	/music/genre/artists	/m/01l87db
/m/02q1tc5	/award/award_category/winners./award/award_honor/award_winner	/m/026n998
/m/02bc74	/music/artist/track_contributions./music/track_contribution/role	/m/05r5c
/m/0kjgl	/people/person/places_lived./people/place_lived/location	/m/0xpp5
/m/06kl78	/film/film/genre	/m/02js9
/m/0gr42	/award/award_category/nominees./award/award_nomination/nominated_for	/m/029jt9
/m/0gvsh7l	/tv/tv_program/genre	/m/01jfsb
/m/02mxw0	/film/actor/film./film/performance/film	/m/01_mdl
/m/01vrncs	/music/artist/contribution./music/recording_contribution/performance_role	/m/042v_gx
/m/03558l	/sports/sports_position/players./sports/sports_team_roster/team	/m/0jmm4
/m/03cl8lb	/award/award_nominee/award_nominations./award/award_nomination/award	/m/02q1tc5
/m/034b6k	/award/award_winning_work/awards_won./award/award_honor/award_winner	/m/01wv9p
/m/09k56b7	/film/film/release_date_s./film/film_regional_release_date/film_release_region	/m/06t8v
/m/0g5pvv	/award/award_nominated_work/award_nominations./award/award_nomination/nominated_for	/m/025twgt
/m/06by7	/music/genre/artists	/m/019x62
/m/02bg55	/film/film/release_date_s./film/film_regional_release_date/film_release_region	/m/03h64
/m/07147	/sports/professional_sports_team/draft_picks./sports/sports_league_draft_pick/school	/m/0lyjf
/m/02x73k6	/award/award_category/nominees./award/award_nomination/nominated_for	/m/02tjl3
/m/01f1kd	/olympics/olympic_games/sports	/m/09_94
/m/0gvsh7l	/tv/tv_program/program_creator	/m/07lwsz
/m/0173b0	/music/genre/artists	/m/0zjpz
/m/051ls	/base/aareas/schema/administrative_area/administrative_parent	/m/04q42
/m/0dgskx	/award/award_nominee/award_nominations./award/award_nomination/award_nominee	/m/0l6px
/m/0dwvl	/music/performance_role/track_performances./music/track_contribution/role	/m/06w7v
/m/0k7tq	/film/film/produced_by	/m/0j_c
/m/0gwjw0c	/film/film/release_date_s./film/film_regional_release_date/film_release_region	/m/059j2
/m/0khth	/award/award_winner/awards_won./award/award_honor/award_winner	/m/0lzkm
/m/026z9	/music/genre/artists	/m/01wbgdv
/m/018db8	/award/award_nominee/award_nominations./award/award_nomination/award	/m/057xs89
/m/02wrrm	/film/actor/film./film/performance/film	/m/0pd57
/m/01jfsb	/media_common/netflix_genre/titles	/m/04mzf8
/m/01vsnff	/music/artist/track_contributions./music/track_contribution/role	/m/05r5c
/m/060c4	/government/politician/government_positions_held./government/government_position_held/jurisdiction_of_office	/m/02wt0
/m/02vjzr	/music/genre/artists	/m/03bxwtd
/m/06by7	/music/genre/artists	/m/015cxv
/m/03j24kf	/music/artist/track_contributions./music/track_contribution/role	/m/042v_gx
/m/026t6	/music/performance_role/track_performances./music/track_contribution/role	/m/05r5c
/m/09kr66	/people/ethnicity/people	/m/0151ns
/m/042v_gx	/music/performance_role/regular_performances./music/group_membership/role	/m/0gghm
/m/034zc0	/film/actor/film./film/performance/film	/m/0296rz
/m/0dgskx	/award/award_winner/awards_won./award/award_honor/award_winner	/m/0170pk
/m/01t2h2	/film/actor/film./film/performance/film	/m/027m67
/m/0136pk	/base/popstra/celebrity/breakup./base/popstra/breakup/participant	/m/01xv77
/m/0br1w	/people/person/profession	/m/0d8qb
/m/0dp7wt	/film/film/cinematography	/m/08t7nz
/m/0grwj	/film/actor/film./film/performance/film	/m/0fs9vc
/m/0b1hw	/award/award_nominee/award_nominations./award/award_nomination/award	/m/02f77l
/m/01645p	/food/food/nutrients./food/nutrition_fact/nutrient	/m/041r51
/m/0c921	/award/award_nominee/award_nominations./award/award_nomination/nominated_for	/m/0gt1k
/m/05148p4	/music/performance_role/regular_performances./music/group_membership/group	/m/033s6
/m/06gjk9	/film/film/genre	/m/01jfsb
/m/04h07s	/base/saturdaynightlive/snl_cast_member/seasons./base/saturdaynightlive/snl_season_tenure/cast_members	/m/0pz7h
/m/015p37	/people/person/gender	/m/02zsn
/m/01l47f5	/award/award_nominee/award_nominations./award/award_nomination/award_nominee	/m/03cfjg
/m/06btq	/location/location/adjoin_s./location/adjoining_relationship/adjoins	/m/01x73
/m/04pg29	/award/award_nominee/award_nominations./award/award_nomination/award	/m/03ccq3s
/m/07sp4l	/film/film/genre	/m/01hmnh
/m/0n6kf	/influence/influence_node/influenced_by	/m/032l1
/m/082db	/film/film_subject/films	/m/042y1c
/m/07gyv	/olympics/olympic_sport/athletes./olympics/olympic_athlete_affiliation/country	/m/0d060g
/m/01gq0b	/award/award_nominee/award_nominations./award/award_nomination/nominated_for	/m/0gvsh7l
/m/0133x7	/award/award_nominee/award_nominations./award/award_nomination/award	/m/03qbnj
/m/01q7q2	/education/educational_institution/students_graduates./education/education/major_field_of_study	/m/0fdys
/m/06rq1k	/business/business_operation/industry	/m/02vxn
/m/059j2	/olympics/olympic_participating_country/athletes./olympics/olympic_athlete_affiliation/olympics	/m/018qb4
/m/0265vcb	/award/award_winner/awards_won./award/award_honor/award_winner	/m/03clrng
/m/0n8bn	/film/actor/film./film/performance/film	/m/01hvjx
/m/037d35	/award/award_nominee/award_nominations./award/award_nomination/award	/m/02x4sn8
/m/0b_6v_	/time/event/locations	/m/0d9y6
/m/01g0jn	/base/popstra/celebrity/breakup./base/popstra/breakup/participant	/m/04xrx
/m/01f7dd	/award/award_nominee/award_nominations./award/award_nomination/award	/m/04ljl_l
/m/0dwsp	/music/performance_role/track_performances./music/track_contribution/role	/m/05r5c
/m/02773nt	/award/award_nominee/award_nominations./award/award_nomination/award	/m/0cjyzs
/m/0bx0l	/film/film/release_date_s./film/film_regional_release_date/film_release_region	/m/03h64
/m/0c73z	/influence/influence_node/influenced_by	/m/082db
/m/01s9vc	/film/film/release_date_s./film/film_regional_release_date/film_release_region	/m/03_3d
/m/057xlyq	/sports/sports_team/roster./american_football/football_roster_position/position	/m/08ns5s
/m/05q_dw	/film/film/featured_film_locations	/m/0cr3d
/m/05g3v	/sports/sports_team/roster./american_football/football_historical_roster_position/position_s	/m/01r3hr
/m/02fwfb	/film/film/country	/m/0345h
/m/03lvyj	/award/award_nominee/award_nominations./award/award_nomination/nominated_for	/m/09k56b7
/m/026m3y	/organization/endowed_organization/endowment./measurement_unit/dated_money_value/currency	/m/01nv4h
/m/0g768	/music/record_label/artist	/m/01vw8mh
/m/03qhyn8	/people/person/profession	/m/026sdt1
/m/02pq_x5	/sports/sports_league_draft/picks./sports/sports_league_draft_pick/school	/m/021w0_
/m/02zrv7	/people/person/profession	/m/018gz8
/m/0170qf	/award/award_nominee/award_nominations./award/award_nomination/nominated_for	/m/02ywwy
/m/0myn8	/location/location/adjoin_s./location/adjoining_relationship/adjoins	/m/0n1xp
/m/0cnl09	/award/award_winner/awards_won./award/award_honor/award_winner	/m/0cms7f
/m/05b2gsm	/award/award_nominee/award_nominations./award/award_nomination/award	/m/0gq_v
/m/07s6prs	/award/award_winner/awards_won./award/award_honor/award_winner	/m/077yk0
/m/01vfqh	/award/award_winning_work/awards_won./award/award_honor/award_winner	/m/02kxbx3
/m/03xx3m	/people/person/place_of_birth	/m/01_d4
/m/0lbj1	/award/award_nominee/award_nominations./award/award_nomination/award_nominee	/m/02cx90
/m/024n3z	/award/award_winner/awards_won./award/award_honor/award_winner	/m/02gvwz
/m/02sp_v	/award/award_category/winners./award/award_honor/award_winner	/m/02lfwp
/m/012x03	/award/award_nominee/award_nominations./award/award_nomination/award	/m/02tj96
/m/03jm6c	/award/award_nominee/award_nominations./award/award_nomination/award	/m/0cc8l6d
/m/047msdk	/film/film/release_date_s./film/film_regional_release_date/film_release_region	/m/09pmkv
/m/0sxdg	/organization/organization/place_founded	/m/0mgp
/m/02hsq3m	/award/award_category/nominees./award/award_nomination/nominated_for	/m/031778
/m/0ch280	/organization/organization/headquarters./location/mailing_address/state_province_region	/m/07b_l
/m/026ps1	/award/award_winner/awards_won./award/award_honor/award_winner	/m/01l4zqz
/m/01twdk	/people/person/profession	/m/018gz8
/m/044ntk	/people/person/profession	/m/01d_h8
/m/0h95927	/award/award_winning_work/awards_won./award/award_honor/award	/m/02n9nmz
/m/06ch55	/music/instrument/instrumentalists	/m/026ps1
/m/03zz8b	/people/person/profession	/m/0d1pc
/m/02xb2bt	/film/actor/film./film/performance/film	/m/01v1ln
/m/01c6qp	/award/award_ceremony/awards_presented./award/award_honor/award_winner	/m/03cfjg
/m/0g5838s	/film/film/release_date_s./film/film_regional_release_date/film_release_region	/m/0k6nt
/m/095nx	/award/award_nominee/award_nominations./award/award_nomination/award	/m/02grdc
/m/05148p4	/music/performance_role/regular_performances./music/group_membership/group	/m/03t9sp
/m/0155w	/music/genre/artists	/m/01whg97
/m/0mzkr	/music/record_label/artist	/m/09mq4m
/m/0h99n	/medicine/disease/notable_people_with_this_condition	/m/01z0rcq
/m/0161c2	/award/award_nominee/award_nominations./award/award_nomination/award	/m/01c427
/m/04mhbh	/award/award_nominee/award_nominations./award/award_nomination/award	/m/02grdc
/m/04k9y6	/film/film/distributors./film/film_film_distributor_relationship/film_distribution_medium	/m/029j_
/m/072r5v	/film/film/release_date_s./film/film_regional_release_date/film_release_distribution_medium	/m/029j_
/m/0bbm7r	/award/award_winning_work/awards_won./award/award_honor/award_winner	/m/01hkhq
/m/01d38t	/award/award_category/winners./award/award_honor/award_winner	/m/02r3zy
/m/07xzm	/music/performance_role/regular_performances./music/group_membership/role	/m/06w7v
/m/060c4	/government/government_office_category/officeholders./government/government_position_held/jurisdiction_of_office	/m/04w4s
/m/0b_75k	/time/event/locations	/m/01_d4
/m/0g22z	/film/film/release_date_s./film/film_regional_release_date/film_release_distribution_medium	/m/029j_
/m/0k_l4	/sports/sports_team/sport	/m/02vx4
/m/04f62k	/film/actor/film./film/performance/film	/m/0dd6bf
/m/01l47f5	/award/award_nominee/award_nominations./award/award_nomination/award_nominee	/m/016srn
/m/01lc5	/people/person/profession	/m/02jknp
/m/0f0y8	/people/person/places_lived./people/place_lived/location	/m/0179qv
/m/04xvlr	/media_common/netflix_genre/titles	/m/026qnh6
/m/01k8rb	/people/person/places_lived./people/place_lived/location	/m/02d6c
/m/073hd1	/award/award_ceremony/awards_presented./award/award_honor/award_winner	/m/027t8fw
/m/0j_c	/film/actor/film./film/performance/film	/m/0k7tq
/m/06by7	/music/genre/artists	/m/02k5sc
/m/01lqnff	/people/person/places_lived./people/place_lived/location	/m/01z28b
/m/03bnv	/people/person/profession	/m/01b30l
/m/0794g	/film/actor/film./film/performance/film	/m/03cmsqb
/m/0gdh5	/people/person/nationality	/m/0d060g
/m/0gbfn9	/film/film/release_date_s./film/film_regional_release_date/film_release_region	/m/07twz
/m/018wrk	/olympics/olympic_games/sports	/m/02vx4
/m/02x4wr9	/award/award_category/nominees./award/award_nomination/nominated_for	/m/0h95927
/m/01pgk0	/people/person/gender	/m/02zsn
/m/03n6r	/people/person/places_lived./people/place_lived/location	/m/02_286
/m/03c602	/award/award_nominee/award_nominations./award/award_nomination/award	/m/02681_5
/m/01nqj	/organization/organization_member/member_of./organization/organization_membership/organization	/m/041288
/m/01cf5	/education/educational_institution/students_graduates./education/education/student	/m/04ns3gy
/m/09q23x	/film/film/costume_design_by	/m/02w0dc0
/m/05b1610	/award/award_category/nominees./award/award_nomination/nominated_for	/m/082scv
/m/07csf4	/people/person/places_lived./people/place_lived/location	/m/02_286
/m/0k6nt	/location/location/adjoin_s./location/adjoining_relationship/adjoins	/m/0345h
/m/02bh_v	/sports/sports_team/sport	/m/02vx4
/m/05148p4	/music/performance_role/regular_performances./music/group_membership/group	/m/09jm8
/m/098n_m	/people/person/profession	/m/01d_h8
/m/0jjy0	/film/film/release_date_s./film/film_regional_release_date/film_release_region	/m/07t21
/m/02d42t	/award/award_nominee/award_nominations./award/award_nomination/nominated_for	/m/0h7t36
/m/01w20rx	/award/award_nominee/award_nominations./award/award_nomination/award	/m/02flq1
/m/0gd_b_	/award/award_nominee/award_nominations./award/award_nomination/nominated_for	/m/02rzdcp
/m/03v1xb	/people/deceased_person/place_of_death	/m/0cc56
/m/01s3v	/location/location/contains	/m/01xrlm
/m/0309jm	/film/actor/film./film/performance/film	/m/01hvjx
/m/03t79f	/film/film/release_date_s./film/film_regional_release_date/film_release_distribution_medium	/m/029j_
/m/01_xtx	/film/actor/film./film/performance/film	/m/0dln8jk
/m/01sl1q	/award/award_winner/awards_won./award/award_honor/award_winner	/m/044n3h
/m/09gkx35	/film/film/release_date_s./film/film_regional_release_date/film_release_region	/m/03_3d
/m/064jjy	/award/award_nominee/award_nominations./award/award_nomination/award_nominee	/m/059m45
/m/01f873	/people/person/spouse_s./people/marriage/location_of_ceremony	/m/07bxhl
/m/060c4	/business/job_title/people_with_this_title./business/employment_tenure/company	/m/07xyn1
/m/060bp	/government/government_office_category/officeholders./government/government_position_held/jurisdiction_of_office	/m/01nqj
/m/01vsnff	/award/award_nominee/award_nominations./award/award_nomination/award	/m/02wh75
/m/02fn5r	/award/award_nominated_work/award_nominations./award/award_nomination/nominated_for	/m/03cfjg
/m/069q4f	/film/film/release_date_s./film/film_regional_release_date/film_release_distribution_medium	/m/029j_
/m/06fc0b	/people/person/profession	/m/01d_h8
/m/0j0k	/base/locations/continents/countries_within	/m/0jdd
/m/023vrq	/award/award_category/winners./award/award_honor/award_winner	/m/016kjs
/m/0p9sw	/award/award_category/winners./award/award_honor/ceremony	/m/0bzknt
/m/01ww2fs	/award/award_winner/awards_won./award/award_honor/award_winner	/m/05sq0m
/m/0pmhf	/film/actor/film./film/performance/film	/m/03shpq
/m/07nt8p	/film/film/genre	/m/01jfsb
/m/0gq_v	/award/award_category/nominees./award/award_nomination/nominated_for	/m/01k7b0
/m/031b3h	/award/award_category/winners./award/award_honor/award_winner	/m/01wzlxj
/m/016srn	/award/award_winner/awards_won./award/award_honor/award_winner	/m/05sq20
/m/01vsykc	/award/award_nominee/award_nominations./award/award_nomination/award_nominee	/m/09hnb
/m/021r6w	/people/person/profession	/m/016fly
/m/07gyv	/olympics/olympic_sport/athletes./olympics/olympic_athlete_affiliation/country	/m/0jdd
/m/02vklm3	/sports/sports_team/roster./american_football/football_roster_position/position	/m/08ns5s
/m/017s11	/film/film_distributor/films_distributed./film/film_film_distributor_relationship/film	/m/0g7pm1
/m/0k4f3	/film/film/genre	/m/01g6gs
/m/03_8r	/olympics/olympic_sport/athletes./olympics/olympic_athlete_affiliation/country	/m/0162v
/m/01c9f2	/award/award_category/winners./award/award_honor/ceremony	/m/056878
/m/0416y94	/film/film/other_crew./film/film_crew_gig/film_crew_role	/m/02_n3z
/m/01ky7c	/education/educational_institution/colors	/m/04mkbj
/m/02r7lqg	/ice_hockey/hockey_team/current_roster./sports/sports_team_roster/position	/m/02qvzf
/m/01gzm2	/film/director/film	/m/014zwb
/m/05148p4	/music/performance_role/track_performances./music/track_contribution/role	/m/07gql
/m/05148p4	/music/instrument/instrumentalists	/m/03f5spx
/m/0d02km	/award/award_winner/awards_won./award/award_honor/award_winner	/m/024n3z
/m/09b69	/location/location/partially_contains	/m/047lj
/m/04mvp8	/people/ethnicity/geographic_distribution	/m/09pmkv
/m/05148p4	/music/performance_role/track_performances./music/track_contribution/role	/m/06w7v
/m/016sp_	/award/award_winner/awards_won./award/award_honor/award_winner	/m/05sq0m
/m/07k51gd	/award/award_nominee/award_nominations./award/award_nomination/award_nominee	/m/07m77x
/m/07gyv	/olympics/olympic_sport/athletes./olympics/olympic_athlete_affiliation/country	/m/0j1z8
/m/016gr2	/film/actor/film./film/performance/film	/m/04yg13l
/m/02jr6k	/film/film/produced_by	/m/0j_c
/m/0p9sw	/award/award_category/winners./award/award_honor/ceremony	/m/073h5b
/m/044mrh	/award/award_winner/awards_won./award/award_honor/award_winner	/m/044n3h
/m/0kvgtf	/film/film/genre	/m/06cvj
/m/033m23	/people/person/places_lived./people/place_lived/location	/m/068p2
/m/027kp3	/education/educational_institution/students_graduates./education/education/student	/m/0pmhf
/m/02qpt1w	/award/award_winning_work/awards_won./award/award_honor/award	/m/02ppm4q
/m/0z05l	/award/award_nominee/award_nominations./award/award_nomination/award	/m/024fz9
/m/02y74	/olympics/olympic_sport/athletes./olympics/olympic_athlete_affiliation/country	/m/059j2
/m/01l47f5	/award/award_nominee/award_nominations./award/award_nomination/award_nominee	/m/05sq0m
/m/0234j5	/film/film/executive_produced_by	/m/025b3k
/m/02x1z2s	/award/award_category/winners./award/award_honor/award_winner	/m/024rdh
/m/0345h	/location/location/adjoin_s./location/adjoining_relationship/adjoins	/m/01mjq
/m/0184tc	/film/film/release_date_s./film/film_regional_release_date/film_release_region	/m/03_3d
/m/060c4	/organization/role/leaders./organization/leadership/organization	/m/017lvd
/m/03q3x5	/award/award_nominee/award_nominations./award/award_nomination/award	/m/09qs08
/m/02n1p5	/people/person/gender	/m/02zsn
/m/02vntj	/award/award_nominee/award_nominations./award/award_nomination/award_nominee	/m/01g23m
/m/0dhd5	/base/biblioness/bibs_location/country	/m/05sb1
/m/0c3p7	/base/popstra/celebrity/dated./base/popstra/dated/participant	/m/01gbn6
/m/03v0t	/location/statistical_region/religions./location/religion_percentage/religion	/m/021_0p
/m/05b4l5x	/award/award_category/nominees./award/award_nomination/nominated_for	/m/0ch3qr1
/m/0198b6	/film/film/edited_by	/m/03cp7b3
/m/06w7v	/music/performance_role/regular_performances./music/group_membership/role	/m/0dwsp
/m/04p3w	/people/cause_of_death/people	/m/01ty7ll
/m/02mqc4	/award/award_winner/awards_won./award/award_honor/award_winner	/m/040t74
/m/02lfcm	/award/award_nominee/award_nominations./award/award_nomination/nominated_for	/m/0kfv9
/m/0h99n	/medicine/disease/notable_people_with_this_condition	/m/044mfr
/m/04gnbv1	/tv/tv_writer/tv_programs./tv/tv_program_writer_relationship/tv_program	/m/02rzdcp
/m/017s11	/award/award_nominee/award_nominations./award/award_nomination/nominated_for	/m/032016
/m/044lyq	/award/award_nominee/award_nominations./award/award_nomination/award_nominee	/m/02f2dn
/m/01kf4tt	/award/award_nominated_work/award_nominations./award/award_nomination/nominated_for	/m/02sg5v
/m/06x58	/award/award_nominee/award_nominations./award/award_nomination/award	/m/05pcn59
/m/01grr2	/government/legislative_session/members./government/government_position_held/legislative_sessions	/m/01gsvb
/m/034b6k	/film/film/genre	/m/02kdv5l
/m/01z7s_	/people/person/spouse_s./people/marriage/type_of_union	/m/01g63y
/m/06k75	/time/event/locations	/m/0d0kn
/m/0dvld	/award/award_winner/awards_won./award/award_honor/award_winner	/m/0z05l
/m/02661h	/film/actor/film./film/performance/film	/m/01vfqh
/m/096f8	/olympics/olympic_sport/athletes./olympics/olympic_athlete_affiliation/country	/m/0345h
/m/09v0p2c	/award/award_ceremony/awards_presented./award/award_honor/award_winner	/m/0pz7h
/m/03cz4j	/film/actor/film./film/performance/film	/m/02vw1w2
/m/047lj	/location/location/adjoin_s./location/adjoining_relationship/adjoins	/m/0jt3tjf
/m/05hdf	/people/person/profession	/m/0d1pc
/m/0gqng	/award/award_category/winners./award/award_honor/ceremony	/m/0c4hnm
/m/016dmx	/award/award_nominee/award_nominations./award/award_nomination/nominated_for	/m/0260bz
/m/02b61v	/film/film/genre	/m/02kdv5l
/m/05_wyz	/business/job_title/people_with_this_title./business/employment_tenure/company	/m/01yx7f
/m/042v_gx	/music/performance_role/regular_performances./music/group_membership/role	/m/05148p4
/m/0bmhvpr	/film/film/release_date_s./film/film_regional_release_date/film_release_region	/m/047lj
/m/0164v	/location/location/adjoin_s./location/adjoining_relationship/adjoins	/m/01699
/m/0gm2_0	/film/film/executive_produced_by	/m/03h40_7
/m/02k5sc	/award/award_nominee/award_nominations./award/award_nomination/award	/m/01c427
/m/015l4k	/olympics/olympic_games/sports	/m/09_94
/m/0kbvb	/user/jg/default_domain/olympic_games/sports	/m/07gyv
/m/06y_n	/tv/tv_program/genre	/m/0hcr
/m/01w923	/music/artist/track_contributions./music/track_contribution/role	/m/03t22m
/m/03r8tl	/award/award_category/winners./award/award_honor/award_winner	/m/05wdgq
/m/03rl1g	/government/legislative_session/members./government/government_position_held/district_represented	/m/03v0t
/m/0dgq80b	/film/film/executive_produced_by	/m/04hw4b
/m/07yp0f	/award/award_winner/awards_won./award/award_honor/award_winner	/m/0hvb2
/m/0cjyzs	/award/award_category/nominees./award/award_nomination/nominated_for	/m/01rp13
/m/0dwsp	/music/performance_role/regular_performances./music/group_membership/role	/m/05148p4
/m/05148p4	/music/performance_role/regular_performances./music/group_membership/group	/m/01dpts
/m/02114t	/film/actor/film./film/performance/film	/m/0435vm
/m/016zp5	/award/award_winner/awards_won./award/award_honor/award_winner	/m/015t7v
/m/0169t	/location/location/adjoin_s./location/adjoining_relationship/adjoins	/m/088xp
/m/07xzm	/music/performance_role/track_performances./music/track_contribution/role	/m/026t6
/m/01dw9z	/award/award_nominee/award_nominations./award/award_nomination/award	/m/01c427
/m/0g5pvv	/award/award_nominated_work/award_nominations./award/award_nomination/nominated_for	/m/02sg5v
/m/03t22m	/music/performance_role/guest_performances./music/recording_contribution/performance_role	/m/03qmg1
/m/0170qf	/award/award_nominee/award_nominations./award/award_nomination/award	/m/02x73k6
/m/05cvgl	/film/film/genre	/m/060__y
/m/02vntj	/base/popstra/celebrity/dated./base/popstra/dated/participant	/m/028r4y
/m/01hmnh	/media_common/netflix_genre/titles	/m/035bcl
