# Supplementary material
Source: ML conference proceedings conference paper supplement (https://proceedings.neurips.cc/paper_files/paper/2021/hash/0fd600c953cde8121262e322ef09f70e-Abstract.html)
Supplement: Supplementary file 1 [file 0fd600c953cde8121262e322ef09f70e-Supplemental.zip › Supplementary_Material_Paper_8745/data/GraIL-BM_fb237_v4/test/test-graph.txt]

/m/02fj8n	/film/film/genre	/m/02kdv5l
/m/02mz_6	/people/person/profession	/m/02jknp
/m/014g22	/people/person/places_lived./people/place_lived/location	/m/0vbk
/m/020h2v	/film/film_distributor/films_distributed./film/film_film_distributor_relationship/film	/m/025rxjq
/m/01b64v	/award/award_winning_work/awards_won./award/award_honor/award_winner	/m/026n998
/m/05rrw9	/government/legislative_session/members./government/government_position_held/district_represented	/m/01x73
/m/05qzv	/people/person/place_of_birth	/m/01_d4
/m/0bdlj	/music/artist/track_contributions./music/track_contribution/role	/m/0214km
/m/02cg7g	/government/legislative_session/members./government/government_position_held/legislative_sessions	/m/02bqmq
/m/0k57l	/people/person/profession	/m/02jknp
/m/026670	/people/person/spouse_s./people/marriage/spouse	/m/02k21g
/m/05148p4	/music/performance_role/regular_performances./music/group_membership/group	/m/011_vz
/m/0bx0l	/award/award_winning_work/awards_won./award/award_honor/award	/m/0p9sw
/m/02k9k9	/sports/sports_team/colors	/m/083jv
/m/05bt6j	/music/genre/artists	/m/03j24kf
/m/0294zg	/film/film/language	/m/02bjrlw
/m/01gqfm	/olympics/olympic_sport/athletes./olympics/olympic_athlete_affiliation/country	/m/0j4b
/m/02c9dj	/education/educational_institution/students_graduates./education/education/student	/m/07n39
/m/056wb	/people/person/profession	/m/01d_h8
/m/06by7	/music/genre/artists	/m/0163m1
/m/0l6m5	/user/jg/default_domain/olympic_games/sports	/m/02vx4
/m/0170pk	/award/award_nominee/award_nominations./award/award_nomination/award_nominee	/m/016gr2
/m/05l71	/sports/sports_team/roster./american_football/football_roster_position/position	/m/01r3hr
/m/0g5qmbz	/film/film/release_date_s./film/film_regional_release_date/film_release_region	/m/01mjq
/m/0c0nhgv	/film/film/release_date_s./film/film_regional_release_date/film_release_region	/m/047lj
/m/0184tc	/film/film/genre	/m/03k9fj
/m/03twd6	/film/film/language	/m/02bjrlw
/m/02rcwq0	/tv/tv_program/regular_cast./tv/regular_tv_appearance/actor	/m/011_3s
/m/01qd_r	/organization/organization/headquarters./location/mailing_address/state_province_region	/m/01n4w
/m/02tcgh	/film/film/genre	/m/01chg
/m/03_qrp	/base/x2010fifaworldcupsouthafrica/world_cup_squad/current_world_cup_squad./base/x2010fifaworldcupsouthafrica/current_world_cup_squad/current_club	/m/021mkg
/m/0j0k	/base/locations/continents/countries_within	/m/0jt3tjf
/m/05_pkf	/award/award_nominee/award_nominations./award/award_nomination/nominated_for	/m/03459x
/m/02x2jl_	/film/film/release_date_s./film/film_regional_release_date/film_release_distribution_medium	/m/029j_
/m/01rgn3	/organization/organization/headquarters./location/mailing_address/state_province_region	/m/01x73
/m/08hmch	/film/film/release_date_s./film/film_regional_release_date/film_release_region	/m/0j1z8
/m/0g5pvv	/film/film/featured_film_locations	/m/02_286
/m/01m94f	/location/hud_county_place/county	/m/0n5yv
/m/013w7j	/award/award_nominee/award_nominations./award/award_nomination/award	/m/02f79n
/m/08wjf4	/award/award_nominee/award_nominations./award/award_nomination/award_nominee	/m/028knk
/m/06ch55	/music/instrument/instrumentalists	/m/03f4k
/m/04gnbv1	/award/award_winner/awards_won./award/award_honor/award_winner	/m/04glr5h
/m/09g7vfw	/film/film/release_date_s./film/film_regional_release_date/film_release_region	/m/03ryn
/m/028dcg	/education/educational_degree/people_with_this_degree./education/education/institution	/m/01w5m
/m/02yv6b	/music/genre/artists	/m/01wmjkb
/m/03k9fj	/media_common/netflix_genre/titles	/m/042g97
/m/016k6x	/award/award_nominee/award_nominations./award/award_nomination/nominated_for	/m/0_816
/m/026n047	/soccer/football_player/current_team./sports/sports_team_roster/team	/m/093g7v
/m/02tr7d	/award/award_nominee/award_nominations./award/award_nomination/award_nominee	/m/03n_7k
/m/06mxs	/travel/travel_destination/climate./travel/travel_destination_monthly_climate/month	/m/04w_7
/m/0162v	/organization/organization_member/member_of./organization/organization_membership/organization	/m/041288
/m/0509cr	/music/genre/parent_genre	/m/025tm81
/m/019v9k	/education/educational_degree/people_with_this_degree./education/education/institution	/m/02ln0f
/m/029fbr	/music/genre/parent_genre	/m/05r6t
/m/0ds3t5x	/award/award_winning_work/awards_won./award/award_honor/award_winner	/m/043kzcr
/m/0294mx	/film/film/music	/m/01d_h
/m/039n1	/user/alexander/philosophy/philosopher/interests	/m/04s0m
/m/01s753	/education/educational_institution/colors	/m/083jv
/m/03khn	/travel/travel_destination/climate./travel/travel_destination_monthly_climate/month	/m/04w_7
/m/0c1d0	/location/location/contains	/m/02s62q
/m/02fn5	/people/person/profession	/m/02jknp
/m/05tg3	/sports/sports_team/roster./american_football/football_historical_roster_position/position_s	/m/01r3hr
/m/01pcz9	/people/person/gender	/m/02zsn
/m/034ks	/people/person/spouse_s./people/marriage/type_of_union	/m/01g63y
/m/01k_r5b	/award/award_nominee/award_nominations./award/award_nomination/award_nominee	/m/016srn
/m/0b275x	/tv/tv_network/programs./tv/tv_network_duration/program	/m/0gfzgl
/m/0c4y8	/people/person/places_lived./people/place_lived/location	/m/06wxw
/m/01c4_6	/award/award_category/winners./award/award_honor/award_winner	/m/0lzkm
/m/032nwy	/award/award_nominee/award_nominations./award/award_nomination/award	/m/025m98
/m/034zc0	/award/award_nominee/award_nominations./award/award_nomination/award_nominee	/m/014g22
/m/02grdc	/award/award_category/winners./award/award_honor/award_winner	/m/01wd9lv
/m/025twgt	/award/award_nominated_work/award_nominations./award/award_nomination/nominated_for	/m/02sg5v
/m/026kq4q	/award/award_ceremony/awards_presented./award/award_honor/award_winner	/m/01dw9z
/m/02vklm3	/sports/sports_team/roster./american_football/football_historical_roster_position/position_s	/m/01r3hr
/m/059j2	/location/location/contains	/m/07w6r
/m/07c52	/media_common/netflix_genre/titles	/m/04f6hhm
/m/01rtm4	/education/educational_institution/students_graduates./education/education/major_field_of_study	/m/05qfh
/m/026qnh6	/film/film/written_by	/m/013tcv
/m/015n8	/people/person/nationality	/m/059j2
/m/0181dw	/music/record_label/artist	/m/0837ql
/m/03f2_rc	/base/popstra/celebrity/dated./base/popstra/dated/participant	/m/0h5g_
/m/041c4	/award/award_nominee/award_nominations./award/award_nomination/nominated_for	/m/01lv85
/m/016dmx	/award/award_nominee/award_nominations./award/award_nomination/award_nominee	/m/01gb54
/m/01w1ywm	/film/actor/film./film/performance/film	/m/03kx49
/m/04jplwp	/film/film/release_date_s./film/film_regional_release_date/film_release_distribution_medium	/m/029j_
/m/011zf2	/award/award_winner/awards_won./award/award_honor/award_winner	/m/026ps1
/m/02f2dn	/film/actor/film./film/performance/film	/m/035zr0
/m/0gqzz	/award/award_category/winners./award/award_honor/award_winner	/m/05jcn8
/m/0hvb2	/award/award_nominee/award_nominations./award/award_nomination/award_nominee	/m/015p37
/m/09b69	/location/location/contains	/m/0d0kn
/m/026c1	/base/popstra/celebrity/friendship./base/popstra/friendship/participant	/m/036dyy
/m/0grwj	/base/popstra/celebrity/canoodled./base/popstra/canoodled/participant	/m/0205dx
/m/04shbh	/film/actor/film./film/performance/film	/m/0dgq_kn
/m/02cx90	/award/award_winner/awards_won./award/award_honor/award_winner	/m/016srn
/m/05r6t	/music/genre/artists	/m/02k5sc
/m/0cpvcd	/influence/influence_node/influenced_by	/m/02wh0
/m/02ljhg	/film/film/executive_produced_by	/m/04fyhv
/m/04mz10g	/award/award_winner/awards_won./award/award_honor/award_winner	/m/0b9dmk
/m/02b6n9	/award/award_winning_work/awards_won./award/award_honor/award	/m/02x73k6
/m/027x7z5	/film/film/genre	/m/01hmnh
/m/07s846j	/film/film/release_date_s./film/film_regional_release_date/film_release_region	/m/01mjq
/m/0jm7n	/sports/professional_sports_team/draft_picks./sports/sports_league_draft_pick/draft	/m/025tn92
/m/08hmch	/film/film/genre	/m/04pbhw
/m/07fq1y	/people/person/gender	/m/02zsn
/m/02qvzf	/sports/sports_position/players./sports/sports_team_roster/team	/m/0hmtk
/m/01j5ts	/film/actor/film./film/performance/film	/m/03cffvv
/m/01l47f5	/award/award_winner/awards_won./award/award_honor/award_winner	/m/05sq0m
/m/0bx_hnp	/film/film/release_date_s./film/film_regional_release_date/film_release_region	/m/03_3d
/m/016lj_	/music/artist/origin	/m/0l3q2
/m/04q42	/location/administrative_division/country	/m/059j2
/m/07c6l	/music/performance_role/regular_performances./music/group_membership/group	/m/0dvqq
/m/0bl1_	/film/film/language	/m/02bjrlw
/m/01vrt_c	/people/person/gender	/m/02zsn
/m/02ppm4q	/award/award_category/nominees./award/award_nomination/nominated_for	/m/0c9k8
/m/0j_c	/film/actor/film./film/performance/film	/m/04mzf8
/m/03mgbf	/sports/sports_team/sport	/m/02vx4
/m/01d6g	/sports/sports_team/roster./baseball/baseball_roster_position/position	/m/02s7tr
/m/07gp9	/film/film/prequel	/m/07ghq
/m/06by7	/music/genre/artists	/m/018dyl
/m/0dj75	/food/food/nutrients./food/nutrition_fact/nutrient	/m/07zqy
/m/047msdk	/film/film/genre	/m/06cvj
/m/04xvlr	/media_common/netflix_genre/titles	/m/07g1sm
/m/031778	/film/film/other_crew./film/film_crew_gig/film_crew_role	/m/01d_h8
/m/03d_w3h	/people/person/gender	/m/02zsn
/m/019v9k	/education/educational_degree/people_with_this_degree./education/education/student	/m/06w38l
/m/0k6yt1	/music/artist/origin	/m/0dclg
/m/017s11	/award/award_winner/awards_won./award/award_honor/award_winner	/m/026c1
/m/031f_m	/film/film/genre	/m/0hcr
/m/05r6t	/music/genre/artists	/m/01w03jv
/m/0170qf	/award/award_nominee/award_nominations./award/award_nomination/nominated_for	/m/0404j37
/m/0l6px	/award/award_nominee/award_nominations./award/award_nomination/award_nominee	/m/016gr2
/m/02hfgl	/sports/sports_team/colors	/m/083jv
/m/05r5c	/music/performance_role/regular_performances./music/group_membership/role	/m/01wy6
/m/014635	/people/person/places_lived./people/place_lived/location	/m/06wxw
/m/025tn92	/sports/sports_league_draft/picks./sports/sports_league_draft_pick/school	/m/01jpyb
/m/0199wf	/film/film/genre	/m/03k9fj
/m/0d608	/award/award_nominee/award_nominations./award/award_nomination/award	/m/04ljl_l
/m/03cd1q	/award/award_nominee/award_nominations./award/award_nomination/award_nominee	/m/01wbgdv
/m/039d4	/education/educational_institution/students_graduates./education/education/major_field_of_study	/m/04_tv
/m/02d42t	/award/award_nominee/award_nominations./award/award_nomination/award	/m/099cng
/m/05kwx2	/film/actor/film./film/performance/film	/m/01pv91
/m/09jw2	/music/genre/parent_genre	/m/0133_p
/m/01vsy7t	/influence/influence_node/influenced_by	/m/08433
/m/01gtcc	/government/legislative_session/members./government/government_position_held/legislative_sessions	/m/01gtc0
/m/0cbgl	/influence/influence_node/influenced_by	/m/0n6kf
/m/02hsq3m	/award/award_category/nominees./award/award_nomination/nominated_for	/m/0dqytn
/m/01ww2fs	/award/award_winner/awards_won./award/award_honor/award_winner	/m/01lmj3q
/m/08vd2q	/award/award_winning_work/awards_won./award/award_honor/award_winner	/m/016ynj
/m/07ghq	/film/film/genre	/m/02kdv5l
/m/05b1610	/award/award_category/nominees./award/award_nomination/nominated_for	/m/05b_gq
/m/040fb	/base/localfood/seasonal_month/produce_available./base/localfood/produce_availability/seasonal_months	/m/06vkl
/m/025_ql1	/people/person/profession	/m/01d_h8
/m/027m67	/award/award_winning_work/awards_won./award/award_honor/award_winner	/m/02404v
/m/021yc7p	/award/award_nominee/award_nominations./award/award_nomination/nominated_for	/m/0gwjw0c
/m/0krdk	/business/job_title/people_with_this_title./business/employment_tenure/company	/m/02zs4
/m/0c4hnm	/award/award_ceremony/awards_presented./award/award_honor/award_winner	/m/05km8z
/m/05m_jsg	/film/film/genre	/m/02kdv5l
/m/0gd0c7x	/film/film/release_date_s./film/film_regional_release_date/film_release_region	/m/03_3d
/m/01_mdl	/award/award_nominated_work/award_nominations./award/award_nomination/nominated_for	/m/042g97
/m/064lsn	/award/award_winning_work/awards_won./award/award_honor/award_winner	/m/01cj6y
/m/0261x8t	/people/person/sibling_s./people/sibling_relationship/sibling	/m/026_dq6
/m/0cnl09	/award/award_nominee/award_nominations./award/award_nomination/award_nominee	/m/0h3mrc
/m/02vm9nd	/award/award_category/winners./award/award_honor/award_winner	/m/02v2jy
/m/01w5m	/education/university/fraternities_and_sororities	/m/035tlh
/m/05bt6j	/music/genre/artists	/m/01vrt_c
/m/0bsjcw	/award/award_category/winners./award/award_honor/award_winner	/m/02114t
/m/0jjy0	/film/film/release_date_s./film/film_regional_release_date/film_release_region	/m/01mjq
/m/02mxbd	/award/award_nominee/award_nominations./award/award_nomination/nominated_for	/m/0ch26b_
/m/02sch9	/people/ethnicity/people	/m/03vrnh
/m/031b3h	/award/award_category/winners./award/award_honor/ceremony	/m/056878
/m/0345h	/media_common/netflix_genre/titles	/m/085ccd
/m/02ndbd	/people/person/places_lived./people/place_lived/location	/m/02_286
/m/09k0f	/government/politician/government_positions_held./government/government_position_held/basic_title	/m/060c4
/m/04jwp	/influence/influence_node/influenced_by	/m/0448r
/m/0dq_5	/organization/role/leaders./organization/leadership/organization	/m/02zs4
/m/03_3d	/olympics/olympic_participating_country/athletes./olympics/olympic_athlete_affiliation/olympics	/m/0kbvb
/m/01q9b9	/people/person/profession	/m/01d_h8
/m/07kjk7c	/award/award_category/winners./award/award_honor/ceremony	/m/05c1t6z
/m/016srn	/award/award_nominee/award_nominations./award/award_nomination/award_nominee	/m/01l47f5
/m/04yg13l	/film/film/release_date_s./film/film_regional_release_date/film_release_region	/m/0d060g
/m/014zwb	/film/film/written_by	/m/01gzm2
/m/0cmc26r	/film/film/genre	/m/01jfsb
/m/0988cp	/award/award_winner/awards_won./award/award_honor/award_winner	/m/06j0md
/m/0c73g	/influence/influence_node/peers./influence/peer_relationship/peers	/m/0hqgp
/m/014vk4	/award/award_nominee/award_nominations./award/award_nomination/award_nominee	/m/09b6zr
/m/025txtg	/sports/sports_team/colors	/m/083jv
/m/01g1lp	/award/award_nominee/award_nominations./award/award_nomination/award	/m/02x4sn8
/m/0dck27	/people/person/profession	/m/026sdt1
/m/07wf9	/government/political_party/politicians_in_this_party./government/political_party_tenure/politician	/m/0rlz
/m/027s39y	/award/award_winning_work/awards_won./award/award_honor/award	/m/0gqzz
/m/0k6yt1	/people/person/place_of_birth	/m/0dclg
/m/03rbj2	/award/award_category/winners./award/award_honor/award_winner	/m/05wdgq
/m/06kl78	/film/film/country	/m/0d060g
/m/0bdx29	/award/award_category/nominees./award/award_nomination/nominated_for	/m/02md2d
/m/026t6	/music/instrument/instrumentalists	/m/0dzlk
/m/0pz7h	/people/person/profession	/m/018gz8
/m/0gghm	/music/performance_role/track_performances./music/track_contribution/role	/m/05148p4
/m/05g76	/baseball/baseball_team/team_stats./baseball/baseball_team_stats/season	/m/03c6sl9
/m/01m13b	/film/film/country	/m/0345h
/m/095kp	/organization/organization/headquarters./location/mailing_address/citytown	/m/02_286
/m/07r_dg	/people/person/place_of_birth	/m/02_286
/m/0d06vc	/base/culturalevent/event/entity_involved	/m/09b6zr
/m/01gvyp	/award/award_nominee/award_nominations./award/award_nomination/award	/m/05b4l5x
/m/015mrk	/award/award_nominee/award_nominations./award/award_nomination/award_nominee	/m/01wzlxj
/m/018wdw	/award/award_category/winners./award/award_honor/ceremony	/m/02yv_b
/m/053rxgm	/film/film/release_date_s./film/film_regional_release_date/film_release_region	/m/05sb1
/m/051m56	/music/artist/origin	/m/013kcv
/m/0gvvm6l	/film/film/release_date_s./film/film_regional_release_date/film_release_region	/m/06t8v
/m/01gbbz	/people/person/gender	/m/02zsn
/m/01ddbl	/sports/sports_league/teams./sports/sports_league_participation/team	/m/01tz_d
/m/05kr_	/base/biblioness/bibs_location/country	/m/0d060g
/m/03m6t5	/base/americancomedy/celebrity_impressionist/celebrities_impersonated	/m/0ly5n
/m/0ymf1	/education/university/international_tuition./measurement_unit/dated_money_value/currency	/m/01nv4h
/m/0fq8f	/travel/travel_destination/how_to_get_here./travel/transportation/mode_of_transportation	/m/0k4j
/m/0k__z	/education/educational_institution/students_graduates./education/education/student	/m/0c01c
/m/0170yd	/award/award_winning_work/awards_won./award/award_honor/award	/m/02w9sd7
/m/01wmjkb	/music/artist/track_contributions./music/track_contribution/role	/m/05148p4
/m/041c4	/people/person/profession	/m/02jknp
/m/0p4wb	/base/schemastaging/organization_extra/phone_number./base/schemastaging/phone_sandbox/service_location	/m/0345h
/m/0dq_5	/business/job_title/people_with_this_title./business/employment_tenure/company	/m/0z90c
/m/02xjb	/music/genre/artists	/m/01wv9p
/m/0j4b	/location/location/adjoin_s./location/adjoining_relationship/adjoins	/m/088xp
/m/01s753	/education/university/local_tuition./measurement_unit/dated_money_value/currency	/m/01nv4h
/m/01rgcg	/people/deceased_person/place_of_death	/m/02_286
/m/0gxb2	/medicine/symptom/symptom_of	/m/0hgxh
/m/0g9zcgx	/award/award_winner/awards_won./award/award_honor/award_winner	/m/0cw67g
/m/0c_gcr	/film/actor/film./film/performance/film	/m/07nt8p
/m/0kfv9	/tv/tv_program/program_creator	/m/04x4s2
/m/01ty7ll	/people/person/places_lived./people/place_lived/location	/m/06wxw
/m/07_l6	/music/instrument/instrumentalists	/m/018phr
/m/071vr	/base/petbreeds/city_with_dogs/top_breeds./base/petbreeds/dog_city_relationship/dog_breed	/m/01k3tq
/m/01jqr_5	/people/deceased_person/place_of_death	/m/0dclg
/m/035bcl	/film/film/featured_film_locations	/m/02_286
/m/034zc0	/award/award_nominee/award_nominations./award/award_nomination/award_nominee	/m/01fh9
/m/0bkf4	/people/person/nationality	/m/03_r3
/m/0dtw1x	/film/film/personal_appearances./film/personal_film_appearance/person	/m/02_wxh
/m/01wmjkb	/music/artist/track_contributions./music/track_contribution/role	/m/026t6
/m/02gd6x	/film/film/release_date_s./film/film_regional_release_date/film_release_distribution_medium	/m/029j_
/m/06zn1c	/award/award_winning_work/awards_won./award/award_honor/award_winner	/m/04vt98
/m/016dj8	/film/film/featured_film_locations	/m/02_286
/m/0p9sw	/award/award_category/nominees./award/award_nomination/nominated_for	/m/072r5v
/m/05r5c	/music/instrument/instrumentalists	/m/016qtt
/m/01lmj3q	/award/award_nominee/award_nominations./award/award_nomination/award_nominee	/m/01l47f5
/m/01pkhw	/award/award_nominee/award_nominations./award/award_nomination/award_nominee	/m/01cj6y
/m/09jw2	/music/genre/parent_genre	/m/05bt6j
/m/06nrt	/location/location/adjoin_s./location/adjoining_relationship/adjoins	/m/05fky
/m/060bp	/government/government_office_category/officeholders./government/government_position_held/jurisdiction_of_office	/m/059j2
/m/017m2y	/people/person/profession	/m/01d_h8
/m/05sq0m	/award/award_nominee/award_nominations./award/award_nomination/award_nominee	/m/01l47f5
/m/01dw9z	/people/person/spouse_s./people/marriage/type_of_union	/m/01g63y
/m/03d_w3h	/award/award_nominee/award_nominations./award/award_nomination/nominated_for	/m/0gydcp7
/m/06rny	/sports/sports_team/roster./american_football/football_historical_roster_position/position_s	/m/01r3hr
/m/01c9f2	/award/award_category/winners./award/award_honor/award_winner	/m/016sqs
/m/0j871	/music/performance_role/regular_performances./music/group_membership/role	/m/0dwsp
/m/0342vg	/people/person/place_of_birth	/m/03h64
/m/02x73k6	/award/award_category/winners./award/award_honor/award_winner	/m/032_jg
/m/02cx90	/award/award_winner/awards_won./award/award_honor/award_winner	/m/0lbj1
/m/0h7t36	/film/film/featured_film_locations	/m/02_286
/m/0124k9	/tv/tv_program/regular_cast./tv/regular_tv_appearance/actor	/m/015p37
/m/03cbtlj	/tv/tv_producer/programs_produced./tv/tv_producer_term/program	/m/0kfv9
/m/02xs5v	/film/actor/film./film/performance/film	/m/03twd6
/m/0bjkpt	/people/person/profession	/m/01d_h8
/m/0dzlbx	/film/film/produced_by	/m/02xnjd
/m/0c9k8	/film/film/genre	/m/04xvlr
/m/0mkz	/film/film_subject/films	/m/08ct6
/m/024tcq	/government/legislative_session/members./government/government_position_held/district_represented	/m/0vbk
/m/07kjk7c	/award/award_category/nominees./award/award_nomination/nominated_for	/m/06nr2h
/m/0127c4	/location/location/contains	/m/0206v5
/m/09fp45	/people/person/gender	/m/02zsn
/m/0g5y6	/people/ethnicity/people	/m/0hwqz
/m/07663r	/people/person/place_of_birth	/m/0cc56
/m/0g5838s	/film/film/language	/m/0c_v2
/m/03gqb0k	/american_football/football_team/current_roster./sports/sports_team_roster/position	/m/01r3hr
/m/0154d7	/film/actor/film./film/performance/film	/m/0199wf
/m/0gh6j94	/film/film/release_date_s./film/film_regional_release_date/film_release_distribution_medium	/m/029j_
/m/0l15n	/people/person/profession	/m/02jknp
/m/0gfmc_	/award/award_nominee/award_nominations./award/award_nomination/award	/m/07bdd_
/m/0c41qv	/business/business_operation/industry	/m/02vxn
/m/02lgj6	/award/award_nominee/award_nominations./award/award_nomination/award_nominee	/m/02lfl4
/m/08k40m	/film/film/release_date_s./film/film_regional_release_date/film_release_distribution_medium	/m/029j_
/m/03cfjg	/award/award_winner/awards_won./award/award_honor/award_winner	/m/016sp_
/m/02n1p5	/people/person/languages	/m/03k50
/m/03cl8lb	/tv/tv_writer/tv_programs./tv/tv_program_writer_relationship/tv_program	/m/01b66t
/m/03b_fm5	/film/film/release_date_s./film/film_regional_release_date/film_release_distribution_medium	/m/029j_
/m/05dss7	/film/film/release_date_s./film/film_regional_release_date/film_release_region	/m/059j2
/m/0mbw0	/people/person/profession	/m/018gz8
/m/0d6qjf	/film/film_subject/films	/m/03twd6
/m/02gvwz	/award/award_nominee/award_nominations./award/award_nomination/award_nominee	/m/024n3z
/m/03ccq3s	/award/award_category/nominees./award/award_nomination/nominated_for	/m/01fszq
/m/011_3s	/award/award_nominee/award_nominations./award/award_nomination/award_nominee	/m/02mqc4
/m/0blpg	/film/film/release_date_s./film/film_regional_release_date/film_regional_debut_venue	/m/02_286
/m/01f8f7	/film/film/edited_by	/m/03cp7b3
/m/04k3r_	/sports/sports_team/sport	/m/02vx4
/m/025m98	/award/award_category/winners./award/award_honor/award_winner	/m/01x6v6
/m/01gqfm	/olympics/olympic_sport/athletes./olympics/olympic_athlete_affiliation/country	/m/0d0kn
/m/01mkq	/education/field_of_study/students_majoring./education/education/major_field_of_study	/m/05qjt
/m/09p06	/people/person/profession	/m/01d_h8
/m/016ndm	/education/educational_institution/colors	/m/03vtbc
/m/0jjy0	/film/film/release_date_s./film/film_regional_release_date/film_release_region	/m/0k6nt
/m/0z05l	/people/person/nationality	/m/0d060g
/m/0qcr0	/people/cause_of_death/people	/m/099p5
/m/013w7j	/award/award_nominee/award_nominations./award/award_nomination/award_nominee	/m/016pns
/m/03_r3	/sports/sports_team_location/teams	/m/03zbg0
/m/03bzjpm	/film/film/executive_produced_by	/m/026c1
/m/0gd0c7x	/film/film/release_date_s./film/film_regional_release_date/film_release_region	/m/03h64
/m/05mlqj	/award/award_nominee/award_nominations./award/award_nomination/award_nominee	/m/02jtjz
/m/06cqb	/music/genre/parent_genre	/m/06rqw
/m/0d060g	/location/location/contains	/m/04s7y
/m/0fpgp26	/film/film/release_date_s./film/film_regional_release_date/film_release_region	/m/03h64
/m/03qbnj	/award/award_category/winners./award/award_honor/ceremony	/m/01c6qp
/m/04xvlr	/media_common/netflix_genre/titles	/m/0_9l_
/m/01vvyfh	/people/person/profession	/m/02jknp
/m/0g768	/music/record_label/artist	/m/01dhjz
/m/06cqb	/music/genre/artists	/m/0bkf4
/m/0gr42	/award/award_category/nominees./award/award_nomination/nominated_for	/m/01f7jt
/m/05g56	/location/location/contains	/m/01c6yz
/m/06n9lt	/people/person/profession	/m/01d_h8
/m/0299hs	/film/film/genre	/m/06n90
/m/0gr42	/award/award_category/winners./award/award_honor/ceremony	/m/0c4hnm
/m/09v3hq_	/film/film_distributor/films_distributed./film/film_film_distributor_relationship/film	/m/09lcsj
/m/01ypc	/sports/sports_team/roster./baseball/baseball_roster_position/position	/m/02rsl1
/m/01gy7r	/film/actor/film./film/performance/film	/m/02ndy4
/m/02_286	/sports/sports_team_location/teams	/m/05g76
/m/09gq0x5	/award/award_winning_work/awards_won./award/award_honor/award	/m/02qt02v
/m/0c3p7	/award/award_nominee/award_nominations./award/award_nomination/nominated_for	/m/02rcwq0
/m/02x1z2s	/award/award_category/nominees./award/award_nomination/nominated_for	/m/03x7hd
/m/02x73k6	/award/award_category/nominees./award/award_nomination/nominated_for	/m/0191n
/m/01d5z	/sports/professional_sports_team/draft_picks./sports/sports_league_draft_pick/school	/m/01tx9m
/m/04j_gs	/people/person/profession	/m/018gz8
/m/03fgm	/education/educational_institution/students_graduates./education/education/student	/m/09hnb
/m/01j48s	/sports/sports_team/sport	/m/02vx4
/m/04xrx	/award/award_nominee/award_nominations./award/award_nomination/award	/m/01cky2
/m/0g5pvv	/film/film/release_date_s./film/film_regional_release_date/film_release_distribution_medium	/m/029j_
/m/02ply6j	/award/award_nominee/award_nominations./award/award_nomination/award_nominee	/m/0l6px
/m/01645p	/food/food/nutrients./food/nutrition_fact/nutrient	/m/027g6p7
/m/01wzlxj	/award/award_nominee/award_nominations./award/award_nomination/award	/m/031b3h
/m/0bdw1g	/award/award_category/winners./award/award_honor/ceremony	/m/05c1t6z
/m/02t1cp	/people/person/places_lived./people/place_lived/location	/m/0cr3d
/m/01vsykc	/award/award_nominee/award_nominations./award/award_nomination/award	/m/03qbnj
/m/03l26m	/people/person/places_lived./people/place_lived/location	/m/02_286
/m/0c6qh	/film/actor/film./film/performance/film	/m/034hwx
/m/0dk0dj	/tv/tv_program/genre	/m/02kdv5l
/m/0288zy	/education/educational_institution/students_graduates./education/education/student	/m/028q6
/m/0222qb	/people/ethnicity/people	/m/020bg
/m/07c52	/media_common/netflix_genre/titles	/m/01rp13
/m/0hwpz	/film/film/written_by	/m/03_gd
/m/02z13jg	/award/award_category/winners./award/award_honor/award_winner	/m/015np0
/m/0gd0c7x	/film/film/release_date_s./film/film_regional_release_date/film_release_region	/m/06mzp
/m/02mc79	/people/person/profession	/m/018gz8
/m/01ww2fs	/award/award_nominee/award_nominations./award/award_nomination/award_nominee	/m/016srn
/m/017s11	/film/film_distributor/films_distributed./film/film_film_distributor_relationship/film	/m/07s846j
/m/02kz_	/influence/influence_node/influenced_by	/m/014635
/m/07nnp_	/film/film/genre	/m/01jfsb
/m/01j7mr	/award/award_winning_work/awards_won./award/award_honor/award	/m/0fc9js
/m/02__7n	/film/actor/film./film/performance/film	/m/03kxj2
/m/01w5m	/education/educational_institution/students_graduates./education/education/major_field_of_study	/m/05qfh
/m/04cv9m	/film/film/genre	/m/01jfsb
/m/01_mdl	/film/film/genre	/m/04pbhw
/m/0894_x	/people/person/languages	/m/02hxcvy
/m/02v49c	/people/person/profession	/m/01d_h8
/m/02q87z6	/film/film/cinematography	/m/04qvl7
/m/08s_lw	/award/award_nominee/award_nominations./award/award_nomination/award_nominee	/m/05wqr1
/m/0bwgc_	/award/award_nominee/award_nominations./award/award_nomination/nominated_for	/m/0g4vmj8
/m/0232lm	/people/person/places_lived./people/place_lived/location	/m/02_286
/m/0f8pz	/award/award_nominee/award_nominations./award/award_nomination/nominated_for	/m/0267wwv
/m/0jxgx	/location/us_county/county_seat	/m/0rqyx
/m/029spt	/location/location/time_zones	/m/03bdv
/m/06kl78	/film/film/other_crew./film/film_crew_gig/film_crew_role	/m/02_n3z
/m/03v6t	/education/educational_institution/students_graduates./education/education/major_field_of_study	/m/05qfh
/m/05njyy	/organization/organization/headquarters./location/mailing_address/citytown	/m/02_286
/m/047c9l	/award/award_nominee/award_nominations./award/award_nomination/nominated_for	/m/02r1ysd
/m/03z106	/film/film/release_date_s./film/film_regional_release_date/film_release_distribution_medium	/m/029j_
/m/0bxtg	/award/award_nominee/award_nominations./award/award_nomination/award_nominee	/m/0c4f4
/m/021q0l	/business/job_title/people_with_this_title./business/employment_tenure/company	/m/06py2
/m/01jwt	/music/genre/parent_genre	/m/0jrv_
/m/0_b3d	/film/film/release_date_s./film/film_regional_release_date/film_release_region	/m/0d060g
/m/02vjzr	/music/genre/artists	/m/026spg
/m/018cqq	/user/ktrueman/default_domain/international_organization/member_states	/m/0k6nt
/m/0g9zcgx	/people/person/gender	/m/02zsn
/m/01rf57	/tv/tv_program/genre	/m/02kdv5l
/m/0hwqz	/film/actor/film./film/performance/film	/m/0hwpz
/m/0kvrb	/award/award_nominee/award_nominations./award/award_nomination/nominated_for	/m/0bscw
/m/0gs6vr	/people/person/gender	/m/02zsn
/m/09v71cj	/film/film/release_date_s./film/film_regional_release_date/film_regional_debut_venue	/m/0prpt
/m/02hsq3m	/award/award_category/nominees./award/award_nomination/nominated_for	/m/0fpv_3_
/m/02x1z2s	/award/award_category/nominees./award/award_nomination/nominated_for	/m/03q0r1
/m/0bxtg	/people/person/profession	/m/02jknp
/m/017lb_	/music/artist/origin	/m/02_286
/m/033wx9	/base/popstra/celebrity/friendship./base/popstra/friendship/participant	/m/019n7x
/m/0294zg	/award/award_winning_work/awards_won./award/award_honor/award_winner	/m/02sjp
/m/0bwfn	/education/educational_institution/students_graduates./education/education/student	/m/026670
/m/0674l0	/business/business_operation/industry	/m/02vxn
/m/02prwdh	/film/film/release_date_s./film/film_regional_release_date/film_release_distribution_medium	/m/029j_
/m/060c4	/government/government_office_category/officeholders./government/government_position_held/jurisdiction_of_office	/m/01699
/m/03f5spx	/award/award_nominee/award_nominations./award/award_nomination/award	/m/01cky2
/m/0pz7h	/award/award_nominee/award_nominations./award/award_nomination/award_nominee	/m/0h27vc
/m/01shy7	/film/film/featured_film_locations	/m/02_286
/m/058frd	/award/award_winner/awards_won./award/award_honor/award_winner	/m/04vlh5
/m/03_05	/business/business_operation/industry	/m/01mw1
/m/0l6px	/award/award_winner/awards_won./award/award_honor/award_winner	/m/051wwp
/m/0191n	/award/award_winning_work/awards_won./award/award_honor/award	/m/02x73k6
/m/05qjt	/education/field_of_study/students_majoring./education/education/student	/m/059y0
/m/016ztl	/film/film/dubbing_performances./film/dubbing_performance/actor	/m/02gf_l
/m/01hmk9	/influence/influence_node/influenced_by	/m/01k9lpl
/m/01wd9lv	/award/award_nominee/award_nominations./award/award_nomination/award	/m/02grdc
/m/0h5qxv	/base/aareas/schema/administrative_area/administrative_parent	/m/0d060g
/m/0f3m1	/film/film/release_date_s./film/film_regional_release_date/film_release_distribution_medium	/m/029j_
/m/077yk0	/award/award_nominee/award_nominations./award/award_nomination/award_nominee	/m/080knyg
/m/0gkkf	/education/university/domestic_tuition./measurement_unit/dated_money_value/currency	/m/01nv4h
/m/01m13b	/award/award_winning_work/awards_won./award/award_honor/award	/m/02qt02v
/m/06hzsx	/people/person/profession	/m/0dgd_
/m/02j62	/education/field_of_study/students_majoring./education/education/major_field_of_study	/m/0_jm
/m/09v71cj	/film/film/release_date_s./film/film_regional_release_date/film_release_region	/m/059j2
/m/01gvyp	/people/person/gender	/m/02zsn
/m/02hsq3m	/award/award_category/nominees./award/award_nomination/nominated_for	/m/01f7jt
/m/0bwfn	/education/educational_institution/students_graduates./education/education/student	/m/058ncz
/m/0dj75	/food/food/nutrients./food/nutrition_fact/nutrient	/m/04kl74p
/m/056878	/award/award_ceremony/awards_presented./award/award_honor/award_winner	/m/0bhvtc
/m/01w5m	/education/educational_institution/students_graduates./education/education/student	/m/036qs_
/m/0hvb2	/award/award_nominee/award_nominations./award/award_nomination/award_nominee	/m/040t74
/m/034x61	/award/award_winner/awards_won./award/award_honor/award_winner	/m/08m4c8
/m/05lfwd	/tv/tv_program/regular_cast./tv/regular_tv_appearance/actor	/m/0k2mxq
/m/07d3x	/award/award_nominee/award_nominations./award/award_nomination/award	/m/0208wk
/m/02w9sd7	/award/award_category/nominees./award/award_nomination/nominated_for	/m/01rwyq
/m/0456xp	/people/person/spouse_s./people/marriage/type_of_union	/m/01g63y
/m/025rxjq	/film/film/language	/m/0295r
/m/0gct_	/influence/influence_node/peers./influence/peer_relationship/peers	/m/060_7
/m/06x58	/award/award_nominee/award_nominations./award/award_nomination/award	/m/099cng
/m/060bp	/government/government_office_category/officeholders./government/government_position_held/jurisdiction_of_office	/m/03548
/m/0c3xw46	/film/film/release_date_s./film/film_regional_release_date/film_release_region	/m/03h64
/m/0sw6g	/people/person/profession	/m/018gz8
/m/02404v	/award/award_nominee/award_nominations./award/award_nomination/award_nominee	/m/069_0y
/m/026bfsh	/tv/tv_program/regular_cast./tv/regular_tv_appearance/actor	/m/02fb1n
/m/01rxyb	/film/film/distributors./film/film_film_distributor_relationship/film_distribution_medium	/m/029j_
/m/01vw37m	/award/award_nominee/award_nominations./award/award_nomination/award_nominee	/m/0163r3
/m/014zcr	/award/award_nominee/award_nominations./award/award_nomination/award_nominee	/m/013knm
/m/0ggq0m	/music/genre/artists	/m/0hqgp
/m/01lqnff	/film/actor/film./film/performance/film	/m/034hwx
/m/0_9l_	/award/award_winning_work/awards_won./award/award_honor/award_winner	/m/02h761
/m/0ds460j	/award/award_ceremony/awards_presented./award/award_honor/award_winner	/m/02z1yj
/m/01fszq	/award/award_winning_work/awards_won./award/award_honor/award	/m/0cjyzs
/m/01f1kd	/user/jg/default_domain/olympic_games/sports	/m/09_94
/m/0fc1_	/location/location/adjoin_s./location/adjoining_relationship/adjoins	/m/0fkhl
/m/05148p4	/music/instrument/instrumentalists	/m/03f6fl0
/m/0c3p7	/people/person/gender	/m/02zsn
/m/02wrrm	/people/person/places_lived./people/place_lived/location	/m/02_286
/m/0gywn	/music/genre/artists	/m/01vsykc
/m/0bs8ndx	/film/film/release_date_s./film/film_regional_release_date/film_release_distribution_medium	/m/029j_
/m/0bwfn	/education/educational_institution/students_graduates./education/education/major_field_of_study	/m/0fdys
/m/01_sz1	/music/genre/artists	/m/01vrt_c
/m/02sp_v	/award/award_category/winners./award/award_honor/award_winner	/m/02r3zy
/m/05gnf	/tv/tv_network/programs./tv/tv_network_duration/program	/m/05pbsry
/m/06jrhz	/award/award_winner/awards_won./award/award_honor/award_winner	/m/09b0xs
/m/06_x996	/award/award_winning_work/awards_won./award/award_honor/award_winner	/m/014zcr
/m/095nx	/people/person/spouse_s./people/marriage/location_of_ceremony	/m/04pry
/m/047rkcm	/film/film/produced_by	/m/059x0w
/m/05gnf	/tv/tv_network/programs./tv/tv_network_duration/program	/m/06qwh
/m/01ppq	/location/country/official_language	/m/0349s
/m/01v3bn	/people/person/spouse_s./people/marriage/spouse	/m/0bw6y
/m/06j8wx	/award/award_nominee/award_nominations./award/award_nomination/award_nominee	/m/016gr2
/m/09889g	/film/actor/film./film/performance/film	/m/027fwmt
/m/07k2x	/business/business_operation/industry	/m/02vxn
/m/0170pk	/award/award_nominee/award_nominations./award/award_nomination/award	/m/02x73k6
/m/0j0k	/base/locations/continents/countries_within	/m/0j1z8
/m/01cwkq	/award/award_nominee/award_nominations./award/award_nomination/award_nominee	/m/06wm0z
/m/024vjd	/award/award_category/winners./award/award_honor/ceremony	/m/01bx35
/m/0ch3qr1	/film/film/release_date_s./film/film_regional_release_date/film_release_distribution_medium	/m/029j_
/m/0gqng	/award/award_category/winners./award/award_honor/award_winner	/m/01tt43d
/m/0d060g	/olympics/olympic_participating_country/medals_won./olympics/olympic_medal_honor/olympics	/m/01f1kd
/m/01cf5	/education/educational_institution/students_graduates./education/education/major_field_of_study	/m/01zc2w
/m/01c0cc	/education/educational_institution/students_graduates./education/education/major_field_of_study	/m/01mkq
/m/01438g	/award/award_winner/awards_won./award/award_honor/award_winner	/m/011zd3
/m/022wxh	/award/award_nominee/award_nominations./award/award_nomination/award	/m/07kjk7c
/m/04w_7	/base/localfood/seasonal_month/produce_available./base/localfood/produce_availability/seasonal_months	/m/0ll3
/m/053rxgm	/film/film/release_date_s./film/film_regional_release_date/film_release_region	/m/059j2
/m/054g1r	/film/film_distributor/films_distributed./film/film_film_distributor_relationship/film	/m/048xyn
/m/02kxbx3	/award/award_nominee/award_nominations./award/award_nomination/award	/m/02x4sn8
/m/0mmpz	/location/location/adjoin_s./location/adjoining_relationship/adjoins	/m/0mmpm
/m/02yv6b	/music/genre/artists	/m/01vrncs
/m/02vqhv0	/film/film/story_by	/m/01v9724
/m/0_9l_	/film/film/release_date_s./film/film_regional_release_date/film_release_distribution_medium	/m/029j_
/m/01c744	/location/administrative_division/country	/m/06mzp
/m/01vs5c	/education/educational_institution/students_graduates./education/education/major_field_of_study	/m/02j62
/m/01vh3r	/film/actor/film./film/performance/film	/m/09y6pb
/m/019v9k	/education/educational_degree/people_with_this_degree./education/education/institution	/m/01w5m
/m/06j8wx	/award/award_nominee/award_nominations./award/award_nomination/award_nominee	/m/0l6px
/m/0l6m5	/user/jg/default_domain/olympic_games/sports	/m/096f8
/m/05km8z	/award/award_nominee/award_nominations./award/award_nomination/award	/m/0gq_v
/m/047vp1n	/film/film/release_date_s./film/film_regional_release_date/film_release_distribution_medium	/m/029j_
/m/092vkg	/award/award_winning_work/awards_won./award/award_honor/award	/m/02x4sn8
/m/0cqgl9	/award/award_category/winners./award/award_honor/award_winner	/m/01gq0b
/m/013knm	/award/award_nominee/award_nominations./award/award_nomination/award_nominee	/m/011zd3
/m/04zkj5	/award/award_nominee/award_nominations./award/award_nomination/award_nominee	/m/0h3mrc
/m/07h565	/award/award_nominee/award_nominations./award/award_nomination/award_nominee	/m/0278x6s
/m/0f04v	/base/petbreeds/city_with_dogs/top_breeds./base/petbreeds/dog_city_relationship/dog_breed	/m/01t032
/m/02x73k6	/award/award_category/nominees./award/award_nomination/nominated_for	/m/072x7s
/m/0bdx29	/award/award_category/nominees./award/award_nomination/nominated_for	/m/02rzdcp
/m/03zrp	/award/award_nominee/award_nominations./award/award_nomination/nominated_for	/m/09d38d
/m/02xry	/location/location/contains	/m/0rqyx
/m/02624g	/award/award_nominee/award_nominations./award/award_nomination/award_nominee	/m/02d4ct
/m/01bx35	/award/award_ceremony/awards_presented./award/award_honor/award_winner	/m/011zf2
/m/019v9k	/education/educational_degree/people_with_this_degree./education/education/institution	/m/04jr87
/m/05xpms	/award/award_winner/awards_won./award/award_honor/award_winner	/m/04zkj5
/m/060c4	/organization/role/leaders./organization/leadership/organization	/m/04344j
/m/0fq27fp	/film/film/release_date_s./film/film_regional_release_date/film_release_region	/m/03h64
/m/02847m9	/film/film/release_date_s./film/film_regional_release_date/film_release_distribution_medium	/m/029j_
/m/0mx6c	/location/location/adjoin_s./location/adjoining_relationship/adjoins	/m/0l339
/m/03cfjg	/award/award_winner/awards_won./award/award_honor/award_winner	/m/05sq20
/m/05148p4	/music/instrument/instrumentalists	/m/09hnb
/m/03_8r	/olympics/olympic_sport/athletes./olympics/olympic_athlete_affiliation/country	/m/07t21
/m/072r5v	/film/film/cinematography	/m/027t8fw
/m/02_n5d	/people/person/gender	/m/02zsn
/m/066yfh	/award/award_nominee/award_nominations./award/award_nomination/award	/m/0cc8l6d
/m/014pg1	/award/award_nominee/award_nominations./award/award_nomination/award	/m/02sp_v
/m/03twd6	/film/film/music	/m/06fxnf
/m/04f6hhm	/tv/tv_program/regular_cast./tv/regular_tv_appearance/actor	/m/045bs6
/m/0dq_5	/organization/role/leaders./organization/leadership/organization	/m/05gnf
/m/07147	/sports/professional_sports_team/draft_picks./sports/sports_league_draft_pick/draft	/m/02r6gw6
/m/0lv1x	/user/jg/default_domain/olympic_games/sports	/m/02bkg
/m/0bk5r	/influence/influence_node/influenced_by	/m/02wh0
/m/0b_6x2	/time/event/locations	/m/06wxw
/m/05frqx	/organization/organization/headquarters./location/mailing_address/state_province_region	/m/05kr_
/m/05pcn59	/award/award_category/nominees./award/award_nomination/nominated_for	/m/0g57wgv
/m/05kwx2	/award/award_winner/awards_won./award/award_honor/award_winner	/m/016gr2
/m/05xpms	/people/person/gender	/m/02zsn
/m/02hrlh	/music/performance_role/track_performances./music/track_contribution/role	/m/0214km
/m/024lff	/film/film/country	/m/0345h
/m/0bksh	/base/popstra/celebrity/dated./base/popstra/dated/participant	/m/01_xtx
/m/041jlr	/award/award_nominee/award_nominations./award/award_nomination/nominated_for	/m/02rb607
/m/02lp3c	/award/award_nominee/award_nominations./award/award_nomination/award	/m/0p9sw
/m/0288zy	/education/educational_institution/colors	/m/083jv
/m/0g57wgv	/film/film/release_date_s./film/film_regional_release_date/film_release_region	/m/0j11
/m/01b66t	/award/award_winning_work/awards_won./award/award_honor/award	/m/02p_04b
/m/04xvlr	/media_common/netflix_genre/titles	/m/04x4gw
/m/064t9	/music/genre/artists	/m/0837ql
/m/057_yx	/award/award_nominee/award_nominations./award/award_nomination/award_nominee	/m/014g22
/m/02wh75	/award/award_category/winners./award/award_honor/award_winner	/m/0gcs9
/m/091z_p	/film/film/genre	/m/04xvlr
/m/02_286	/location/location/contains	/m/05njyy
/m/0770cd	/award/award_nominee/award_nominations./award/award_nomination/award	/m/01cky2
/m/026t6	/music/performance_role/track_performances./music/track_contribution/role	/m/0dwvl
/m/0ds2n	/film/film/release_date_s./film/film_regional_release_date/film_release_distribution_medium	/m/029j_
/m/0jzw	/award/award_winning_work/awards_won./award/award_honor/award	/m/02x73k6
/m/060ny2	/government/legislative_session/members./government/government_position_held/legislative_sessions	/m/024tcq
/m/01gzm2	/people/person/profession	/m/01d_h8
/m/025hwq	/business/business_operation/industry	/m/07c52
/m/06n9lt	/people/person/profession	/m/02jknp
/m/08bytj	/tv/tv_program/regular_cast./tv/regular_tv_appearance/actor	/m/015p3p
/m/02ltg3	/base/x2010fifaworldcupsouthafrica/world_cup_squad/current_world_cup_squad./base/x2010fifaworldcupsouthafrica/current_world_cup_squad/current_club	/m/06l22
/m/01ws9n6	/award/award_winner/awards_won./award/award_honor/award_winner	/m/016kjs
/m/02rsl1	/sports/sports_position/players./sports/sports_team_roster/team	/m/01ypc
/m/0cn_tpv	/military/military_combatant/military_conflicts./military/military_combatant_group/combatants	/m/024pcx
/m/026n998	/award/award_winner/awards_won./award/award_honor/award_winner	/m/063lqs
/m/06by7	/music/genre/artists	/m/01vs14j
/m/01jzyf	/film/film/release_date_s./film/film_regional_release_date/film_release_distribution_medium	/m/029j_
/m/0278x6s	/award/award_nominee/award_nominations./award/award_nomination/award_nominee	/m/07h565
/m/03k50	/language/human_language/countries_spoken_in	/m/0162v
/m/070mff	/government/legislative_session/members./government/government_position_held/legislative_sessions	/m/02bqmq
/m/02bn_p	/government/legislative_session/members./government/government_position_held/district_represented	/m/0vmt
/m/0lzkm	/music/artist/track_contributions./music/track_contribution/role	/m/042v_gx
/m/0ds2l81	/film/film/release_date_s./film/film_regional_release_date/film_release_region	/m/0345h
/m/064t9	/music/genre/artists	/m/016kjs
/m/0j_c	/film/director/film	/m/0k7tq
/m/025m98	/award/award_category/winners./award/award_honor/award_winner	/m/01cbt3
/m/01kv4mb	/people/person/place_of_birth	/m/0z53k
/m/02rmd_2	/film/film/genre	/m/06cvj
/m/0j0k	/location/location/contains	/m/0jt3tjf
/m/05gml8	/award/award_nominee/award_nominations./award/award_nomination/award	/m/05pcn59
/m/0353tm	/film/film/country	/m/0d060g
/m/049qx	/base/popstra/celebrity/friendship./base/popstra/friendship/participant	/m/05m7zg
/m/0fpv_3_	/film/film/release_date_s./film/film_regional_release_date/film_release_distribution_medium	/m/029j_
/m/02bkg	/olympics/olympic_sport/athletes./olympics/olympic_athlete_affiliation/country	/m/0d04z6
/m/0jgvy	/base/biblioness/bibs_location/state	/m/0dj0x
/m/072x7s	/film/film/language	/m/0349s
/m/02d49z	/film/film/release_date_s./film/film_regional_release_date/film_release_distribution_medium	/m/029j_
/m/0blpg	/film/film/release_date_s./film/film_regional_release_date/film_release_region	/m/03h64
/m/02hblj	/people/person/profession	/m/01d_h8
/m/0n6ds	/film/film/production_companies	/m/017s11
/m/04x4gw	/film/film/genre	/m/03k9fj
/m/089j8p	/film/film/release_date_s./film/film_regional_release_date/film_release_region	/m/03h64
/m/01zn4y	/education/university/international_tuition./measurement_unit/dated_money_value/currency	/m/01nv4h
/m/04xvlr	/media_common/netflix_genre/titles	/m/020fcn
/m/05tbn	/location/location/contains	/m/0dzs0
/m/01vfqh	/film/film/genre	/m/04xvlr
/m/0g5qmbz	/film/film/release_date_s./film/film_regional_release_date/film_release_region	/m/059j2
/m/0pv54	/film/film/costume_design_by	/m/02mxbd
/m/0fr63l	/film/film/genre	/m/02kdv5l
/m/020h2v	/organization/organization/place_founded	/m/0r00l
/m/02mw6c	/education/educational_institution/school_type	/m/01jlsn
/m/060c4	/organization/role/leaders./organization/leadership/organization	/m/01qdhx
/m/07c52	/media_common/netflix_genre/titles	/m/06qxh
/m/0fdys	/education/field_of_study/students_majoring./education/education/major_field_of_study	/m/05qfh
/m/05bt6j	/music/genre/artists	/m/02twdq
/m/0l15n	/people/person/profession	/m/0dgd_
/m/0770cd	/music/artist/track_contributions./music/track_contribution/role	/m/05r5c
/m/09gq0x5	/film/film/genre	/m/04xvlr
/m/02vw1w2	/film/film/genre	/m/02kdv5l
/m/02r6gw6	/sports/sports_league_draft/picks./sports/sports_league_draft_pick/school	/m/01qgr3
/m/02f2dn	/award/award_nominee/award_nominations./award/award_nomination/award	/m/099cng
/m/0fbzp	/location/location/adjoin_s./location/adjoining_relationship/adjoins	/m/0fkhl
/m/0234j5	/film/film/release_date_s./film/film_regional_release_date/film_release_distribution_medium	/m/029j_
/m/018wdw	/award/award_category/winners./award/award_honor/ceremony	/m/0bc773
/m/019v9k	/education/educational_degree/people_with_this_degree./education/education/institution	/m/0160nk
/m/042v_gx	/music/performance_role/regular_performances./music/group_membership/role	/m/07xzm
/m/0bx0l	/award/award_winning_work/awards_won./award/award_honor/award	/m/0gq_v
/m/0ckm4x	/people/person/gender	/m/02zsn
/m/05qb8vx	/award/award_ceremony/awards_presented./award/award_honor/award_winner	/m/02mxbd
/m/01w5m	/education/educational_institution/students_graduates./education/education/major_field_of_study	/m/01zc2w
/m/0cj8x	/award/award_nominee/award_nominations./award/award_nomination/award	/m/02grdc
/m/0bdw6t	/award/award_category/nominees./award/award_nomination/nominated_for	/m/03d34x8
/m/05jx17	/sports/sports_team/sport	/m/02vx4
/m/02rjjll	/award/award_ceremony/awards_presented./award/award_honor/award_winner	/m/01lmj3q
/m/043q4d	/tv/non_character_role/tv_regular_personal_appearances./tv/tv_regular_personal_appearance/person	/m/01wkmgb
/m/02mj7c	/education/educational_institution/students_graduates./education/education/student	/m/03d_w3h
/m/026g801	/film/actor/film./film/performance/film	/m/04f6df0
/m/07xzm	/music/performance_role/regular_performances./music/group_membership/role	/m/0gghm
/m/01q8hj	/education/educational_institution/colors	/m/04mkbj
/m/03902	/travel/travel_destination/climate./travel/travel_destination_monthly_climate/month	/m/04w_7
/m/03lvyj	/people/person/spouse_s./people/marriage/location_of_ceremony	/m/01x73
/m/0gjw_	/military/military_conflict/combatants./military/military_combatant_group/combatants	/m/027qpc
/m/0b_6v_	/time/event/locations	/m/04f_d
/m/0k2mxq	/film/actor/film./film/performance/film	/m/09cr8
/m/0kvgtf	/film/film/release_date_s./film/film_regional_release_date/film_release_distribution_medium	/m/029j_
/m/0f2zc	/sports/pro_athlete/teams./sports/sports_team_roster/team	/m/01ypc
/m/01qxs3	/business/business_operation/industry	/m/01mw1
/m/09fb5	/base/popstra/celebrity/friendship./base/popstra/friendship/participant	/m/09k0f
/m/01k8rb	/base/popstra/celebrity/dated./base/popstra/dated/participant	/m/09fb5
/m/01jfsb	/media_common/netflix_genre/titles	/m/0cqr0q
/m/01wn718	/people/person/places_lived./people/place_lived/location	/m/01_d4
/m/07vfy4	/film/film/country	/m/0d060g
/m/02_n5d	/people/person/profession	/m/01d_h8
/m/027vps	/people/person/places_lived./people/place_lived/location	/m/02_286
/m/0blgl	/award/award_nominee/award_nominations./award/award_nomination/award_nominee	/m/03v40v
/m/0137n0	/award/award_nominee/award_nominations./award/award_nomination/award	/m/03tk6z
/m/0bx0lc	/award/award_nominee/award_nominations./award/award_nomination/award_nominee	/m/02tr7d
/m/0bw6y	/award/award_nominee/award_nominations./award/award_nomination/award	/m/0bdw1g
/m/05bt6j	/music/genre/artists	/m/01sbf2
/m/02w5q6	/people/person/place_of_birth	/m/071vr
/m/05r5c	/music/instrument/instrumentalists	/m/028q6
/m/0456zg	/film/film/genre	/m/0gsy3b
/m/013knm	/award/award_nominee/award_nominations./award/award_nomination/award_nominee	/m/02__7n
/m/0fbx6	/people/person/gender	/m/02zsn
/m/092ggq	/film/actor/film./film/performance/film	/m/0g7pm1
/m/0fbtbt	/award/award_category/nominees./award/award_nomination/nominated_for	/m/02md2d
/m/02w1b8	/film/film_subject/films	/m/0dzlbx
/m/0kjgl	/award/award_nominee/award_nominations./award/award_nomination/nominated_for	/m/09rvwmy
/m/06s6hs	/award/award_winner/awards_won./award/award_honor/award_winner	/m/034x61
/m/0349s	/language/human_language/countries_spoken_in	/m/0d060g
/m/0294zg	/award/award_winning_work/awards_won./award/award_honor/award_winner	/m/01438g
/m/0487c3	/soccer/football_player/current_team./sports/sports_team_roster/team	/m/01fwqn
/m/05wqr1	/award/award_nominee/award_nominations./award/award_nomination/award_nominee	/m/0b9dmk
/m/02gd6x	/film/film/language	/m/0880p
/m/014zcr	/film/actor/film./film/performance/film	/m/06_x996
/m/0bdt8	/award/award_nominee/award_nominations./award/award_nomination/nominated_for	/m/04vq33
/m/01x_d8	/award/award_nominee/award_nominations./award/award_nomination/nominated_for	/m/0c0zq
/m/05148p4	/music/performance_role/regular_performances./music/group_membership/role	/m/03t22m
/m/0308kx	/award/award_nominee/award_nominations./award/award_nomination/award_nominee	/m/0443y3
/m/0k2mxq	/award/award_winner/awards_won./award/award_honor/award_winner	/m/034x61
/m/021j72	/people/person/sibling_s./people/sibling_relationship/sibling	/m/02vmzp
/m/01sg7_	/people/person/profession	/m/01445t
/m/02k6hp	/people/cause_of_death/people	/m/02wr6r
/m/09fb5	/people/person/profession	/m/01d_h8
/m/03cn92	/people/person/gender	/m/02zsn
/m/014zcr	/award/award_winner/awards_won./award/award_honor/award_winner	/m/0c6qh
/m/07c6l	/music/performance_role/regular_performances./music/group_membership/role	/m/07gql
/m/02cx90	/award/award_winner/awards_won./award/award_honor/award_winner	/m/03cfjg
/m/06fmdb	/award/award_winner/awards_won./award/award_honor/award_winner	/m/0dvld
/m/016732	/people/person/place_of_birth	/m/0cr3d
/m/01wy6	/music/instrument/instrumentalists	/m/01l7cxq
/m/0c6qh	/base/popstra/celebrity/friendship./base/popstra/friendship/participant	/m/01vswwx
/m/0gwjw0c	/film/film/release_date_s./film/film_regional_release_date/film_release_region	/m/03_3d
/m/02rrfzf	/film/film/music	/m/015cxv
/m/03q0r1	/film/film/release_date_s./film/film_regional_release_date/film_release_distribution_medium	/m/029j_
/m/0gpx6	/award/award_winning_work/awards_won./award/award_honor/award_winner	/m/024rdh
/m/080knyg	/award/award_winner/awards_won./award/award_honor/award_winner	/m/077yk0
/m/02pp1	/sports/sports_team/sport	/m/02vx4
/m/013423	/award/award_nominee/award_nominations./award/award_nomination/award	/m/01c99j
/m/02bkg	/olympics/olympic_sport/athletes./olympics/olympic_athlete_affiliation/country	/m/03_3d
/m/0df2zx	/film/film/genre	/m/09q17
/m/0278x6s	/film/actor/film./film/performance/film	/m/0hgnl3t
/m/0n1xp	/location/location/adjoin_s./location/adjoining_relationship/adjoins	/m/0n1v8
/m/03vv61	/music/record_label/artist	/m/02qsjt
/m/07663r	/people/person/places_lived./people/place_lived/location	/m/0cc56
/m/07jjt	/olympics/olympic_sport/athletes./olympics/olympic_athlete_affiliation/country	/m/01mjq
/m/05c1t6z	/award/award_ceremony/awards_presented./award/award_honor/award_winner	/m/02773nt
/m/0bw6y	/base/popstra/celebrity/friendship./base/popstra/friendship/participant	/m/0cgbf
/m/0308kx	/award/award_nominee/award_nominations./award/award_nomination/award_nominee	/m/01wb8bs
/m/05v1sb	/award/award_nominee/award_nominations./award/award_nomination/nominated_for	/m/04mzf8
/m/01gzm2	/people/person/gender	/m/02zsn
/m/01w5m	/education/educational_institution/students_graduates./education/education/major_field_of_study	/m/02j62
/m/01vs5c	/education/university/fraternities_and_sororities	/m/035tlh
/m/07ypt	/location/location/contains	/m/07wlt
/m/02lfl4	/award/award_nominee/award_nominations./award/award_nomination/award_nominee	/m/0436f4
/m/02fn5r	/award/award_nominee/award_nominations./award/award_nomination/award_nominee	/m/010hn
/m/0gq_v	/award/award_category/winners./award/award_honor/ceremony	/m/0bc773
/m/06dl_	/award/award_nominee/award_nominations./award/award_nomination/award_nominee	/m/0c921
/m/02vz6dn	/film/film/release_date_s./film/film_regional_release_date/film_release_region	/m/059j2
/m/02bn_p	/government/legislative_session/members./government/government_position_held/legislative_sessions	/m/060ny2
/m/081g_l	/music/record_label/artist	/m/0gs6vr
/m/06ch55	/music/instrument/instrumentalists	/m/0bdlj
/m/019vgs	/people/person/places_lived./people/place_lived/location	/m/02dtg
/m/0285c	/music/group_member/membership./music/group_membership/group	/m/02r3zy
/m/02_2v2	/tv/tv_writer/tv_programs./tv/tv_program_writer_relationship/tv_program	/m/01b66t
/m/016kjs	/award/award_nominee/award_nominations./award/award_nomination/award_nominee	/m/01vrt_c
/m/059gkk	/award/award_winner/awards_won./award/award_honor/award_winner	/m/02lgj6
/m/060c4	/government/government_office_category/officeholders./government/government_position_held/jurisdiction_of_office	/m/0j4b
/m/0cqh6z	/award/award_category/nominees./award/award_nomination/nominated_for	/m/01fx1l
/m/03qmg1	/music/performance_role/regular_performances./music/group_membership/role	/m/07xzm
/m/026dg51	/award/award_nominee/award_nominations./award/award_nomination/award_nominee	/m/02_2v2
/m/04n32	/music/artist/track_contributions./music/track_contribution/role	/m/07gql
/m/0sw6g	/award/award_nominee/award_nominations./award/award_nomination/nominated_for	/m/02czd5
/m/06dkzt	/award/award_nominee/award_nominations./award/award_nomination/award	/m/02n9nmz
/m/04vlh5	/people/person/place_of_birth	/m/02_286
/m/027mdh	/education/educational_institution/students_graduates./education/education/major_field_of_study	/m/05qjt
/m/08gyz_	/people/person/gender	/m/02zsn
/m/02ck1	/people/person/nationality	/m/0cdbq
/m/01cbt3	/award/award_nominee/award_nominations./award/award_nomination/award	/m/025m98
/m/01s9vc	/film/film/release_date_s./film/film_regional_release_date/film_release_region	/m/03h64
/m/0hvb2	/people/person/place_of_birth	/m/029cr
/m/02f4s3	/education/educational_institution/colors	/m/04mkbj
/m/0dwsp	/music/performance_role/track_performances./music/track_contribution/role	/m/0151b0
/m/03zz8b	/people/person/gender	/m/02zsn
/m/0g6xq	/base/aareas/schema/administrative_area/administrative_parent	/m/09pmkv
/m/01gbn6	/award/award_nominee/award_nominations./award/award_nomination/award	/m/05b4l5x
/m/049yf	/location/location/contains	/m/05gqf
/m/01fh36	/music/genre/artists	/m/018d6l
/m/07vjm	/education/educational_institution/students_graduates./education/education/student	/m/048_p
/m/026m3y	/education/university/local_tuition./measurement_unit/dated_money_value/currency	/m/01nv4h
/m/04syw	/government/government_office_category/officeholders./government/government_position_held/jurisdiction_of_office	/m/03_r3
/m/019v9k	/education/educational_degree/people_with_this_degree./education/education/institution	/m/01rgn3
/m/01200d	/people/person/profession	/m/02jknp
/m/060c4	/organization/role/leaders./organization/leadership/organization	/m/01w5m
/m/0c4f4	/award/award_nominee/award_nominations./award/award_nomination/award	/m/02ppm4q
/m/03f2_rc	/people/person/gender	/m/02zsn
/m/04l57x	/ice_hockey/hockey_team/current_roster./sports/sports_team_roster/position	/m/02qvzf
/m/015n8	/user/alexander/philosophy/philosopher/interests	/m/04s0m
/m/0fbtbt	/award/award_category/nominees./award/award_nomination/nominated_for	/m/07gbf
/m/030dr	/influence/influence_node/influenced_by	/m/0gz_
/m/0m32h	/people/cause_of_death/people	/m/02v2jy
/m/011zf2	/award/award_nominee/award_nominations./award/award_nomination/award_nominee	/m/028q6
/m/01c6qp	/award/award_ceremony/awards_presented./award/award_honor/award_winner	/m/01wv9p
/m/019v9k	/education/educational_degree/people_with_this_degree./education/education/major_field_of_study	/m/01mkq
/m/0345h	/location/location/contains	/m/0d3ff
/m/01rrd4	/base/popstra/celebrity/friendship./base/popstra/friendship/participant	/m/01rr9f
/m/02g2wv	/award/award_category/winners./award/award_honor/award_winner	/m/019vgs
/m/018t8f	/organization/organization/headquarters./location/mailing_address/state_province_region	/m/01n4w
/m/064t9	/music/genre/artists	/m/016pns
/m/0d810y	/award/award_nominee/award_nominations./award/award_nomination/nominated_for	/m/02rzdcp
/m/02rg_4	/organization/organization/headquarters./location/mailing_address/citytown	/m/0_7z2
/m/03f2_rc	/base/popstra/celebrity/dated./base/popstra/dated/participant	/m/016h4r
/m/01722w	/education/educational_institution/students_graduates./education/education/student	/m/01vwbts
/m/09pj68	/award/award_ceremony/awards_presented./award/award_honor/honored_for	/m/092vkg
/m/02ck1	/music/artist/track_contributions./music/track_contribution/role	/m/05r5c
/m/0282x	/influence/influence_node/influenced_by	/m/040dv
/m/02px_23	/sports/sports_team/roster./american_football/football_roster_position/position	/m/08ns5s
/m/04czhj	/organization/organization/headquarters./location/mailing_address/citytown	/m/0r00l
/m/02kgb7	/award/award_category/winners./award/award_honor/award_winner	/m/02t_99
/m/03_8r	/olympics/olympic_sport/athletes./olympics/olympic_athlete_affiliation/country	/m/03h2c
/m/03hfmm	/film/film/other_crew./film/film_crew_gig/film_crew_role	/m/02vs3x5
/m/07s7gk6	/music/genre/artists	/m/03xl77
/m/01hmnh	/media_common/netflix_genre/titles	/m/03lrqw
/m/07phbc	/film/film/release_date_s./film/film_regional_release_date/film_release_distribution_medium	/m/029j_
/m/0gdh5	/film/actor/film./film/performance/film	/m/03hfmm
/m/02ddq4	/award/award_category/winners./award/award_honor/award_winner	/m/01vrncs
/m/031b3h	/award/award_category/winners./award/award_honor/award_winner	/m/01wbgdv
/m/059j2	/olympics/olympic_participating_country/medals_won./olympics/olympic_medal_honor/olympics	/m/01f1kd
/m/0b7t3p	/people/person/gender	/m/02zsn
/m/0jzw	/film/film/other_crew./film/film_crew_gig/crewmember	/m/02lp3c
/m/0345h	/location/location/contains	/m/09krp
/m/089j8p	/film/film/release_date_s./film/film_regional_release_date/film_release_region	/m/01mjq
/m/02x73k6	/award/award_category/nominees./award/award_nomination/nominated_for	/m/02jr6k
/m/0p_sc	/award/award_winning_work/awards_won./award/award_honor/award_winner	/m/019x62
/m/0bxtg	/film/actor/film./film/performance/film	/m/09q23x
/m/05b1610	/award/award_category/nominees./award/award_nomination/nominated_for	/m/0fphf3v
/m/01d6g	/sports/sports_team/roster./baseball/baseball_roster_position/position	/m/017drs
/m/03j24kf	/people/person/spouse_s./people/marriage/type_of_union	/m/01g63y
/m/05r6t	/music/genre/artists	/m/01tp5bj
/m/0pmhf	/film/actor/film./film/performance/film	/m/01rwyq
/m/020h2v	/film/film_distributor/films_distributed./film/film_film_distributor_relationship/film	/m/0f61tk
/m/08m4c8	/award/award_nominee/award_nominations./award/award_nomination/award_nominee	/m/034x61
/m/029pnn	/film/actor/film./film/performance/film	/m/0hwpz
/m/01gvxv	/award/award_nominee/award_nominations./award/award_nomination/nominated_for	/m/045r_9
/m/0jyb4	/film/film/release_date_s./film/film_regional_release_date/film_release_region	/m/03h64
/m/0jdd	/location/country/official_language	/m/0swlx
/m/03cbtlj	/award/award_nominee/award_nominations./award/award_nomination/award_nominee	/m/04x4s2
/m/02h0f3	/film/actor/film./film/performance/film	/m/0jswp
/m/02tr7d	/award/award_nominee/award_nominations./award/award_nomination/award_nominee	/m/0l6px
/m/05r5c	/music/instrument/instrumentalists	/m/01vwbts
/m/06mmr	/award/award_winning_work/awards_won./award/award_honor/award	/m/0gr42
/m/01grp0	/government/legislative_session/members./government/government_position_held/legislative_sessions	/m/01grr2
/m/01q8hj	/education/educational_institution/students_graduates./education/education/major_field_of_study	/m/02j62
/m/0835q	/people/person/religion	/m/02rsw
/m/05tbn	/location/location/adjoin_s./location/adjoining_relationship/adjoins	/m/02_286
/m/02bn_p	/government/legislative_session/members./government/government_position_held/district_represented	/m/05fky
/m/01hmk9	/film/actor/film./film/performance/film	/m/03kx49
/m/0pmw9	/award/award_nominated_work/award_nominations./award/award_nomination/nominated_for	/m/02fn5r
/m/05mcjs	/award/award_nominee/award_nominations./award/award_nomination/award	/m/0fbtbt
/m/0lyjf	/education/educational_institution/students_graduates./education/education/student	/m/02j490
/m/01gwck	/education/educational_institution/colors	/m/083jv
/m/0bt7ws	/award/award_winner/awards_won./award/award_honor/award_winner	/m/04zkj5
/m/01c65z	/award/award_nominee/award_nominations./award/award_nomination/award	/m/02w9sd7
/m/03mg35	/award/award_nominee/award_nominations./award/award_nomination/award_nominee	/m/01pkhw
/m/026n998	/award/award_winner/awards_won./award/award_honor/award_winner	/m/03clrng
/m/02bqn1	/government/legislative_session/members./government/government_position_held/district_represented	/m/0vmt
/m/016zp5	/award/award_nominee/award_nominations./award/award_nomination/award_nominee	/m/01kwld
/m/045c66	/award/award_nominee/award_nominations./award/award_nomination/award_nominee	/m/0347xl
/m/01f7jt	/film/film/story_by	/m/01f7j9
/m/018db8	/people/person/places_lived./people/place_lived/location	/m/0fw4v
/m/014zcr	/award/award_nominee/award_nominations./award/award_nomination/nominated_for	/m/06z8s_
/m/04rkkv	/education/educational_institution/students_graduates./education/education/student	/m/01jmv8
/m/0jjy0	/film/film/featured_film_locations	/m/0dclg
/m/06by7	/music/genre/artists	/m/01c8v0
/m/01vl17	/people/person/profession	/m/01d_h8
/m/0bl60p	/award/award_nominee/award_nominations./award/award_nomination/award_nominee	/m/059gkk
/m/07wjk	/education/educational_institution/students_graduates./education/education/major_field_of_study	/m/05qjt
/m/028dcg	/education/educational_degree/people_with_this_degree./education/education/institution	/m/02mj7c
/m/040whs	/sports/sports_team/sport	/m/02vx4
/m/026dg51	/award/award_winner/awards_won./award/award_honor/award_winner	/m/026dd2b
/m/09zmys	/film/actor/film./film/performance/film	/m/0191n
/m/01tzm9	/people/person/profession	/m/018gz8
/m/01f8f7	/film/film/genre	/m/06n90
/m/0vhm	/tv/tv_program/genre	/m/0hcr
/m/063lqs	/award/award_nominee/award_nominations./award/award_nomination/award_nominee	/m/026dg51
/m/07k51gd	/award/award_winner/awards_won./award/award_honor/award_winner	/m/077yk0
/m/0l6m5	/user/jg/default_domain/olympic_games/sports	/m/0194d
/m/053rxgm	/film/film/release_date_s./film/film_regional_release_date/film_release_region	/m/09pmkv
/m/06fq2	/education/educational_institution/students_graduates./education/education/major_field_of_study	/m/01mkq
/m/08hmch	/film/film/genre	/m/01jfsb
/m/0lbj1	/music/group_member/membership./music/group_membership/group	/m/0frsw
/m/060c4	/organization/role/leaders./organization/leadership/organization	/m/03wv2g
/m/03m6t5	/people/person/nationality	/m/0d060g
/m/03k9fj	/media_common/netflix_genre/titles	/m/034r25
/m/0gxb2	/medicine/symptom/symptom_of	/m/035482
/m/09qs08	/award/award_category/winners./award/award_honor/award_winner	/m/07m77x
/m/08xvpn	/film/film/genre	/m/04xvlr
/m/07g1sm	/award/award_nominated_work/award_nominations./award/award_nomination/nominated_for	/m/0jsf6
/m/025rxjq	/film/film/other_crew./film/film_crew_gig/film_crew_role	/m/02_n3z
/m/0dck27	/people/person/gender	/m/02zsn
/m/03d1y3	/people/person/profession	/m/02jknp
/m/02pxst	/film/film/release_date_s./film/film_regional_release_date/film_release_region	/m/059j2
/m/0c0zq	/film/film/music	/m/01x6v6
/m/01wd9lv	/people/person/spouse_s./people/marriage/spouse	/m/05hdf
/m/0b9dmk	/people/person/gender	/m/02zsn
/m/0gjk1d	/film/film/release_date_s./film/film_regional_release_date/film_release_distribution_medium	/m/029j_
/m/07rlg	/olympics/olympic_sport/athletes./olympics/olympic_athlete_affiliation/country	/m/0d060g
/m/01wl38s	/music/artist/track_contributions./music/track_contribution/role	/m/05148p4
/m/034zc0	/award/award_nominee/award_nominations./award/award_nomination/award_nominee	/m/057_yx
/m/01gtbb	/government/legislative_session/members./government/government_position_held/district_represented	/m/05tbn
/m/05bnp0	/award/award_nominee/award_nominations./award/award_nomination/award_nominee	/m/058frd
/m/049mql	/film/film/genre	/m/03k9fj
/m/02wrrm	/people/person/place_of_birth	/m/02_286
/m/03ctqqf	/award/award_winning_work/awards_won./award/award_honor/award_winner	/m/0g5lhl7
/m/032xhg	/film/actor/film./film/performance/film	/m/02ryz24
/m/0dwvl	/music/performance_role/regular_performances./music/group_membership/role	/m/042v_gx
/m/03c_cxn	/award/award_winning_work/awards_won./award/award_honor/award	/m/09cn0c
/m/0139q5	/people/person/gender	/m/02zsn
/m/047t_	/organization/organization_member/member_of./organization/organization_membership/organization	/m/041288
/m/0412f5y	/award/award_nominee/award_nominations./award/award_nomination/award	/m/01cky2
/m/0gq_v	/award/award_category/nominees./award/award_nomination/nominated_for	/m/0_9l_
/m/01gw8b	/award/award_nominee/award_nominations./award/award_nomination/award	/m/0gkts9
/m/03clrng	/award/award_winner/awards_won./award/award_honor/award_winner	/m/026dg51
/m/02qfv5d	/media_common/netflix_genre/titles	/m/03shpq
/m/019v9k	/education/educational_degree/people_with_this_degree./education/education/institution	/m/03p2m1
/m/01438g	/film/actor/film./film/performance/film	/m/03cffvv
/m/05r5c	/music/performance_role/regular_performances./music/group_membership/group	/m/0dvqq
/m/0416y94	/award/award_winning_work/awards_won./award/award_honor/award	/m/09cn0c
/m/01gvxv	/film/actor/film./film/performance/film	/m/047tsx3
/m/016gr2	/award/award_nominee/award_nominations./award/award_nomination/award_nominee	/m/02tr7d
/m/0d_rw	/tv/tv_program/genre	/m/01hmnh
/m/02pt6k_	/award/award_winner/awards_won./award/award_honor/award_winner	/m/06jvj7
/m/07xzm	/music/performance_role/regular_performances./music/group_membership/role	/m/05r5c
/m/018wdw	/award/award_category/winners./award/award_honor/award_winner	/m/0bbxx9b
/m/016sp_	/award/award_winner/awards_won./award/award_honor/award_winner	/m/01lmj3q
/m/04fkg4	/people/person/profession	/m/02jknp
/m/0h1_w	/film/actor/film./film/performance/film	/m/0bl5c
/m/01q9b9	/award/award_nominee/award_nominations./award/award_nomination/award_nominee	/m/05slvm
/m/0h69c	/sports/sports_league/teams./sports/sports_league_participation/team	/m/01ypc
/m/07yk1xz	/film/film/genre	/m/060__y
/m/059gkk	/award/award_nominee/award_nominations./award/award_nomination/award_nominee	/m/0bl60p
/m/09krp	/location/location/contains	/m/0bkv0
/m/02kxbx3	/people/person/profession	/m/02jknp
/m/0p9sw	/award/award_category/nominees./award/award_nomination/nominated_for	/m/07g1sm
/m/01cky2	/award/award_category/winners./award/award_honor/award_winner	/m/0ffgh
/m/05cvgl	/film/film/release_date_s./film/film_regional_release_date/film_release_distribution_medium	/m/029j_
/m/0d04z6	/organization/organization_member/member_of./organization/organization_membership/organization	/m/041288
/m/026kmvf	/soccer/football_player/current_team./sports/sports_team_roster/team	/m/01_1kk
/m/0gvsh7l	/award/award_winning_work/awards_won./award/award_honor/award	/m/0fbtbt
/m/0g2jl	/education/educational_institution/students_graduates./education/education/student	/m/0c4y8
/m/01bmlb	/people/person/places_lived./people/place_lived/location	/m/0cc56
/m/0278x6s	/award/award_nominee/award_nominations./award/award_nomination/award_nominee	/m/0c4f4
/m/046qq	/people/person/profession	/m/01d_h8
/m/018gqj	/music/artist/track_contributions./music/track_contribution/role	/m/05r5c
/m/0410cp	/award/award_nominee/award_nominations./award/award_nomination/nominated_for	/m/016z9n
/m/0d060g	/location/location/contains	/m/01r32
/m/025t9b	/film/actor/film./film/performance/film	/m/0gltv
/m/02x4wr9	/award/award_category/nominees./award/award_nomination/nominated_for	/m/0bmhvpr
/m/0gkydb	/award/award_winner/awards_won./award/award_honor/award_winner	/m/0pz7h
/m/0qm8b	/film/film/other_crew./film/film_crew_gig/crewmember	/m/021yc7p
/m/09rvwmy	/film/film/featured_film_locations	/m/027kp3
/m/01vrt_c	/award/award_nominee/award_nominations./award/award_nomination/award	/m/02f79n
/m/04ljl_l	/award/award_category/nominees./award/award_nomination/nominated_for	/m/0272_vz
/m/01gbn6	/film/actor/film./film/performance/film	/m/01sxly
/m/0h3mrc	/award/award_nominee/award_nominations./award/award_nomination/award	/m/0cjyzs
/m/02bjrlw	/language/human_language/countries_spoken_in	/m/06mzp
/m/037q1z	/people/person/profession	/m/01d_h8
/m/04wp63	/film/actor/film./film/performance/film	/m/027s39y
/m/031ns1	/education/educational_institution/students_graduates./education/education/student	/m/01wk3c
/m/01ww2fs	/award/award_winner/awards_won./award/award_honor/award_winner	/m/02cx90
/m/024n3z	/award/award_winner/awards_won./award/award_honor/award_winner	/m/016zp5
/m/07ym6ss	/people/person/profession	/m/01d_h8
/m/06f0dc	/government/legislative_session/members./government/government_position_held/district_represented	/m/06btq
/m/095kp	/education/educational_institution/students_graduates./education/education/major_field_of_study	/m/02j62
/m/02w9sd7	/award/award_category/nominees./award/award_nomination/nominated_for	/m/0gjk1d
/m/01jzyf	/film/film/written_by	/m/02kxbx3
/m/0456zg	/film/film/music	/m/06fxnf
/m/042g97	/film/film/release_date_s./film/film_regional_release_date/film_release_distribution_medium	/m/029j_
/m/013knm	/film/actor/film./film/performance/film	/m/09cr8
/m/03n0cd	/film/film/genre	/m/02kdv5l
/m/0qcr0	/people/cause_of_death/people	/m/056wb
/m/02lg9w	/award/award_nominee/award_nominations./award/award_nomination/award_nominee	/m/059gkk
/m/0grwj	/base/popstra/celebrity/friendship./base/popstra/friendship/participant	/m/0dvld
/m/0170yd	/film/film/written_by	/m/037d35
/m/09g7vfw	/film/film/release_date_s./film/film_regional_release_date/film_release_region	/m/0d060g
/m/03k0yw	/music/artist/track_contributions./music/track_contribution/role	/m/05148p4
/m/01q7cb_	/people/person/profession	/m/02jknp
/m/0kfv9	/award/award_winning_work/awards_won./award/award_honor/award	/m/0cqh6z
/m/09y20	/film/actor/film./film/performance/film	/m/01msrb
/m/0d060g	/location/location/contains	/m/01k3s2
/m/0pmhf	/influence/influence_node/influenced_by	/m/02bf2s
/m/026r8q	/award/award_winner/awards_won./award/award_honor/award_winner	/m/0794g
/m/024fz9	/award/award_category/winners./award/award_honor/award_winner	/m/06fmdb
/m/01tt43d	/award/award_nominee/award_nominations./award/award_nomination/award	/m/0gqng
/m/06s1qy	/award/award_nominee/award_nominations./award/award_nomination/award	/m/02n9nmz
/m/0j0k	/location/location/contains	/m/07t_x
/m/014zcr	/film/actor/film./film/performance/film	/m/06z8s_
/m/01lmj3q	/award/award_nominee/award_nominations./award/award_nomination/award_nominee	/m/05sq20
/m/02nvg1	/organization/organization/headquarters./location/mailing_address/state_province_region	/m/03v0t
/m/06w7v	/music/performance_role/regular_performances./music/group_membership/role	/m/07xzm
/m/0c7ct	/people/person/spouse_s./people/marriage/type_of_union	/m/01g63y
/m/05pd94v	/award/award_ceremony/awards_presented./award/award_honor/award_winner	/m/02cx90
/m/041c4	/film/actor/film./film/performance/film	/m/02qydsh
/m/0kjgl	/film/actor/film./film/performance/film	/m/09cr8
/m/07_bv_	/people/person/gender	/m/02zsn
/m/02lfl4	/award/award_winner/awards_won./award/award_honor/award_winner	/m/0436f4
/m/0cmc26r	/film/film/release_date_s./film/film_regional_release_date/film_release_region	/m/03_3d
/m/02f2dn	/award/award_nominee/award_nominations./award/award_nomination/award_nominee	/m/02qfhb
/m/015t7v	/award/award_nominee/award_nominations./award/award_nomination/award_nominee	/m/01846t
/m/0fc9js	/award/award_category/winners./award/award_honor/award_winner	/m/030tj5
/m/03s5t	/location/statistical_region/religions./location/religion_percentage/religion	/m/01y0s9
/m/03zrc_	/base/x2010fifaworldcupsouthafrica/world_cup_squad/current_world_cup_squad./base/x2010fifaworldcupsouthafrica/current_world_cup_squad/current_club	/m/0mmd6
/m/020h2v	/award/award_nominee/award_nominations./award/award_nomination/award	/m/02x1z2s
/m/01hkhq	/award/award_nominee/award_nominations./award/award_nomination/award	/m/02ppm4q
/m/025m98	/award/award_category/winners./award/award_honor/award_winner	/m/0bdlj
/m/04xrx	/people/person/places_lived./people/place_lived/location	/m/02_286
/m/051m56	/people/person/places_lived./people/place_lived/location	/m/013kcv
/m/0ds33	/film/film/featured_film_locations	/m/02_286
/m/05r6t	/music/genre/artists	/m/0b1zz
/m/015mrk	/award/award_nominee/award_nominations./award/award_nomination/award	/m/01c99j
/m/0hvb2	/award/award_nominee/award_nominations./award/award_nomination/award_nominee	/m/09fb5
/m/01zt10	/people/person/place_of_birth	/m/04cx5
/m/014g22	/award/award_nominee/award_nominations./award/award_nomination/nominated_for	/m/016z9n
/m/02lfcm	/award/award_nominee/award_nominations./award/award_nomination/award_nominee	/m/0436f4
/m/026t6	/music/instrument/instrumentalists	/m/01wmjkb
/m/0b_6lb	/time/event/locations	/m/06wxw
/m/03v0t	/location/location/contains	/m/0sgtz
/m/0cmf0m0	/film/film/genre	/m/0hcr
/m/011zf2	/award/award_nominee/award_nominations./award/award_nomination/award	/m/0257wh
/m/0rqyx	/location/capital_of_administrative_division/capital_of./location/administrative_division_capital_relationship/administrative_division	/m/0jxgx
/m/06y3r	/people/person/religion	/m/0kpl
/m/0s4sj	/base/biblioness/bibs_location/state	/m/03v0t
/m/0hwpz	/film/film/produced_by	/m/03_gd
/m/06m6p7	/film/actor/film./film/performance/film	/m/02ljhg
/m/0hgnl3t	/film/film/release_date_s./film/film_regional_release_date/film_release_region	/m/0k6nt
/m/03zz8b	/award/award_nominee/award_nominations./award/award_nomination/award_nominee	/m/045c66
/m/01rr9f	/base/popstra/celebrity/friendship./base/popstra/friendship/participant	/m/01rrd4
/m/0fbtbt	/award/award_category/nominees./award/award_nomination/nominated_for	/m/0gvsh7l
/m/0d060g	/location/location/contains	/m/0179q0
/m/04qk12	/film/film/written_by	/m/05mcjs
/m/02z6872	/sports/sports_league_draft/picks./sports/sports_league_draft_pick/school	/m/022lly
/m/0407f	/award/award_nominee/award_nominations./award/award_nomination/award_nominee	/m/02r3zy
/m/07nt8p	/film/film/release_date_s./film/film_regional_release_date/film_release_distribution_medium	/m/029j_
/m/017g21	/people/person/religion	/m/0kpl
/m/0gpx6	/award/award_winning_work/awards_won./award/award_honor/award	/m/0fm3b5
/m/01vsyjy	/music/group_member/membership./music/group_membership/role	/m/06w7v
/m/0qm98	/award/award_winning_work/awards_won./award/award_honor/award	/m/09d28z
/m/0147w8	/tv/tv_program/regular_cast./tv/regular_tv_appearance/actor	/m/0443y3
/m/0bwfn	/education/educational_institution/students_graduates./education/education/student	/m/02r251z
/m/02ctc6	/film/film/genre	/m/03k9fj
/m/03cfjg	/award/award_winner/awards_won./award/award_honor/award_winner	/m/02cx90
/m/05kr_	/location/location/contains	/m/018lc_
/m/0fvyz	/location/capital_of_administrative_division/capital_of./location/administrative_division_capital_relationship/administrative_division	/m/05fky
/m/06j8wx	/film/actor/film./film/performance/film	/m/04yg13l
/m/03t79f	/film/film/produced_by	/m/016dmx
/m/018cqq	/user/ktrueman/default_domain/international_organization/member_states	/m/0345h
/m/04205z	/award/award_nominee/award_nominations./award/award_nomination/award	/m/02ppm4q
/m/01jfsb	/media_common/netflix_genre/titles	/m/0g4vmj8
/m/02yv6b	/music/genre/artists	/m/01vsyjy
/m/0hwpz	/award/award_winning_work/awards_won./award/award_honor/award_winner	/m/0hwqz
/m/019v9k	/education/educational_degree/people_with_this_degree./education/education/institution	/m/01qd_r
/m/015ppk	/award/award_winning_work/awards_won./award/award_honor/award	/m/0bdw6t
/m/0gy30w	/film/film/other_crew./film/film_crew_gig/film_crew_role	/m/02_n3z
/m/0151b0	/music/performance_role/track_performances./music/track_contribution/role	/m/026t6
/m/05dss7	/film/film/written_by	/m/064jjy
/m/060bp	/government/government_office_category/officeholders./government/government_position_held/jurisdiction_of_office	/m/0285m87
/m/01kwld	/people/person/nationality	/m/0345h
/m/0z05l	/award/award_nominee/award_nominations./award/award_nomination/award_nominee	/m/02d4ct
/m/02yxjs	/education/educational_institution/students_graduates./education/education/major_field_of_study	/m/05qfh
/m/0f6c3	/government/government_office_category/officeholders./government/government_position_held/jurisdiction_of_office	/m/03v0t
/m/01gb54	/award/award_nominee/award_nominations./award/award_nomination/nominated_for	/m/0cmf0m0
/m/0dq_5	/organization/role/leaders./organization/leadership/organization	/m/0dq23
/m/0829rj	/people/person/profession	/m/01d_h8
/m/03y9ccy	/award/award_nominee/award_nominations./award/award_nomination/award	/m/0fbtbt
/m/011x_4	/film/film/language	/m/02bjrlw
/m/01kwld	/people/person/places_lived./people/place_lived/location	/m/01rwf_
/m/0bscw	/film/film/genre	/m/01jfsb
/m/015t7v	/award/award_winner/awards_won./award/award_honor/award_winner	/m/01846t
/m/0dh1n_	/award/award_nominee/award_nominations./award/award_nomination/award	/m/0gq_v
/m/0cqh6z	/award/award_category/nominees./award/award_nomination/nominated_for	/m/015ppk
/m/08gg47	/film/film/other_crew./film/film_crew_gig/film_crew_role	/m/02vs3x5
/m/03zv9	/sports/sports_league/teams./sports/sports_league_participation/team	/m/04999m
/m/0cbxl0	/award/award_winner/awards_won./award/award_honor/award_winner	/m/03wpmd
/m/0bk5r	/influence/influence_node/influenced_by	/m/032l1
/m/0133_p	/music/genre/parent_genre	/m/0gywn
/m/026dd2b	/award/award_nominee/award_nominations./award/award_nomination/nominated_for	/m/02_1q9
/m/03mgbf	/sports/sports_team/colors	/m/083jv
/m/0173s9	/organization/organization/headquarters./location/mailing_address/state_province_region	/m/0dj0x
/m/0c4f4	/award/award_nominee/award_nominations./award/award_nomination/award_nominee	/m/014488
/m/0mz73	/people/person/profession	/m/01d_h8
/m/02pd1q9	/american_football/football_team/current_roster./sports/sports_team_roster/position	/m/01r3hr
/m/02d42t	/people/person/spouse_s./people/marriage/type_of_union	/m/01g63y
/m/0d810y	/award/award_winner/awards_won./award/award_honor/award_winner	/m/0gd_b_
/m/01r3hr	/sports/sports_position/players./sports/sports_team_roster/team	/m/05l71
/m/05x_5	/education/university/fraternities_and_sororities	/m/035tlh
/m/012jfb	/film/film/personal_appearances./film/personal_film_appearance/person	/m/09b6zr
/m/0_9l_	/award/award_winning_work/awards_won./award/award_honor/award	/m/09cn0c
/m/0fx0j2	/people/person/place_of_birth	/m/01_d4
/m/07c9s	/language/human_language/countries_spoken_in	/m/0d060g
/m/0285c	/music/group_member/membership./music/group_membership/group	/m/0b1zz
/m/0c9k8	/award/award_winning_work/awards_won./award/award_honor/award	/m/02ppm4q
/m/02x1z2s	/award/award_category/nominees./award/award_nomination/nominated_for	/m/050xxm
/m/0bzknt	/award/award_ceremony/awards_presented./award/award_honor/award_winner	/m/07qcbw
/m/05r5c	/music/performance_role/regular_performances./music/group_membership/role	/m/06w7v
/m/01vsyjy	/music/group_member/membership./music/group_membership/role	/m/05148p4
/m/051m56	/award/award_winner/awards_won./award/award_honor/award_winner	/m/016sp_
/m/05r6t	/music/genre/artists	/m/07h76
/m/016k6x	/film/actor/film./film/performance/film	/m/0_816
/m/09q17	/media_common/netflix_genre/titles	/m/02rmd_2
/m/08s_lw	/award/award_nominee/award_nominations./award/award_nomination/award_nominee	/m/0b9dmk
/m/03clrng	/award/award_nominee/award_nominations./award/award_nomination/award_nominee	/m/026n998
/m/020h2v	/film/film_distributor/films_distributed./film/film_film_distributor_relationship/film	/m/0243cq
/m/04v8x9	/film/film/genre	/m/03k9fj
/m/0bhvtc	/award/award_winner/awards_won./award/award_honor/award_winner	/m/0249kn
/m/01wwvt2	/music/group_member/membership./music/group_membership/role	/m/07gql
/m/01ypc	/sports/professional_sports_team/draft_picks./sports/sports_league_draft_pick/school	/m/01vs5c
/m/01rf57	/tv/tv_program/genre	/m/06n90
/m/0lbj1	/award/award_nominee/award_nominations./award/award_nomination/award_nominee	/m/0qf11
/m/0kjgl	/award/award_nominee/award_nominations./award/award_nomination/nominated_for	/m/09cr8
/m/0347xl	/award/award_nominee/award_nominations./award/award_nomination/award_nominee	/m/03zz8b
/m/028dcg	/education/educational_degree/people_with_this_degree./education/education/major_field_of_study	/m/026bk
/m/01mv_n	/people/person/place_of_birth	/m/02_286
/m/070mff	/government/legislative_session/members./government/government_position_held/district_represented	/m/0vbk
/m/064t9	/music/genre/artists	/m/01wv9p
/m/02tr7d	/award/award_nominee/award_nominations./award/award_nomination/award_nominee	/m/016gr2
/m/0gq_d	/award/award_category/winners./award/award_honor/ceremony	/m/02yv_b
/m/0739y	/influence/influence_node/influenced_by	/m/01wj9y9
/m/02j4sk	/award/award_nominee/award_nominations./award/award_nomination/award	/m/0bdw6t
/m/09b0xs	/people/person/profession	/m/01d_h8
/m/01n2m6	/music/record_label/artist	/m/01vw8mh
/m/01cky2	/award/award_category/winners./award/award_honor/ceremony	/m/01bx35
/m/05148p4	/music/performance_role/regular_performances./music/group_membership/role	/m/05r5c
/m/02hsq3m	/award/award_category/nominees./award/award_nomination/nominated_for	/m/05nlx4
/m/026dg51	/tv/tv_writer/tv_programs./tv/tv_program_writer_relationship/tv_program	/m/0gj50
/m/01dw9z	/award/award_nominee/award_nominations./award/award_nomination/award	/m/03tk6z
/m/0cbgl	/influence/influence_node/influenced_by	/m/032l1
/m/01j_cy	/education/educational_institution/students_graduates./education/education/student	/m/0cv9fc
/m/0g51l1	/people/person/profession	/m/02jknp
/m/02_1q9	/tv/tv_program/regular_cast./tv/regular_tv_appearance/actor	/m/02zfg3
/m/0ptxj	/film/film/genre	/m/01drsx
/m/02cx90	/music/artist/track_contributions./music/track_contribution/role	/m/07_l6
/m/09dvgb8	/award/award_nominee/award_nominations./award/award_nomination/award_nominee	/m/021yc7p
/m/07kh6f3	/film/film/genre	/m/060__y
/m/0448r	/people/person/languages	/m/02bjrlw
/m/02pq_x5	/sports/sports_league_draft/picks./sports/sports_league_draft_pick/school	/m/0160nk
/m/0fs9vc	/film/film/genre	/m/01hmnh
/m/011zd3	/base/popstra/celebrity/friendship./base/popstra/friendship/participant	/m/026c1
/m/05mlqj	/film/actor/film./film/performance/film	/m/024lff
/m/09qr6	/music/artist/track_contributions./music/track_contribution/role	/m/042v_gx
/m/0gj9tn5	/film/film/release_date_s./film/film_regional_release_date/film_release_region	/m/02k8k
/m/0p9sw	/award/award_category/nominees./award/award_nomination/nominated_for	/m/03hmt9b
/m/02xjb	/music/genre/artists	/m/049qx
/m/01_k0d	/influence/influence_node/influenced_by	/m/08433
/m/04vjh	/location/location/adjoin_s./location/adjoining_relationship/adjoins	/m/06srk
/m/02xry	/location/location/contains	/m/0rrhp
/m/02r6c_	/people/person/profession	/m/02jknp
/m/02cg7g	/government/legislative_session/members./government/government_position_held/legislative_sessions	/m/024tcq
/m/054knh	/award/award_category/nominees./award/award_nomination/nominated_for	/m/0gvvm6l
/m/02mj7c	/organization/organization/headquarters./location/mailing_address/state_province_region	/m/03v0t
/m/0cv1h	/location/location/adjoin_s./location/adjoining_relationship/adjoins	/m/0mnlq
/m/04wqr	/people/person/gender	/m/02zsn
/m/07bs0	/olympics/olympic_sport/athletes./olympics/olympic_athlete_affiliation/country	/m/01mjq
/m/01f8f7	/award/award_winning_work/awards_won./award/award_honor/award_winner	/m/01f873
/m/05x2s	/award/award_category/disciplines_or_subjects	/m/02xlf
/m/04kjrv	/music/group_member/membership./music/group_membership/role	/m/05r5c
/m/06gbnc	/people/ethnicity/people	/m/0cg9f
/m/0g55tzk	/award/award_ceremony/awards_presented./award/award_honor/award_winner	/m/01gq0b
/m/04jlgp	/people/person/gender	/m/02zsn
/m/05jcn8	/people/person/profession	/m/02jknp
/m/09y20	/award/award_nominee/award_nominations./award/award_nomination/nominated_for	/m/0pv54
/m/0cmc26r	/film/film/release_date_s./film/film_regional_release_date/film_release_region	/m/0k6nt
/m/026t6	/music/performance_role/regular_performances./music/group_membership/role	/m/042v_gx
/m/07g1sm	/film/film/language	/m/04h9h
/m/01s7qqw	/music/artist/track_contributions./music/track_contribution/role	/m/026t6
/m/09q17	/media_common/netflix_genre/titles	/m/07phbc
/m/03lyp4	/tv/tv_program/genre	/m/01hmnh
/m/09gq0x5	/film/film/release_date_s./film/film_regional_release_date/film_release_distribution_medium	/m/029j_
/m/03r8v_	/award/award_category/winners./award/award_honor/award_winner	/m/025p38
/m/02wh0	/influence/influence_node/influenced_by	/m/0gz_
/m/05148p4	/music/instrument/instrumentalists	/m/01j590z
/m/0gd0c7x	/film/film/release_date_s./film/film_regional_release_date/film_release_region	/m/03ryn
/m/01m7pwq	/music/artist/track_contributions./music/track_contribution/role	/m/042v_gx
/m/044ptm	/award/award_nominee/award_nominations./award/award_nomination/award	/m/03rbj2
/m/02nvg1	/education/educational_institution/colors	/m/083jv
/m/054g1r	/film/film_distributor/films_distributed./film/film_film_distributor_relationship/film	/m/01pj_5
/m/04fyhv	/award/award_nominee/award_nominations./award/award_nomination/nominated_for	/m/08lr6s
/m/09v0p2c	/award/award_ceremony/awards_presented./award/award_honor/award_winner	/m/04glr5h
/m/07c52	/media_common/netflix_genre/titles	/m/06qw_
/m/03g90h	/film/film/release_date_s./film/film_regional_release_date/film_release_region	/m/09pmkv
/m/027m67	/film/film/film_production_design_by	/m/03cp7b3
/m/0f04v	/travel/travel_destination/climate./travel/travel_destination_monthly_climate/month	/m/04w_7
/m/02p21g	/film/actor/film./film/performance/film	/m/03lrht
/m/07g1sm	/film/film/featured_film_locations	/m/02_286
/m/08hmch	/film/film/release_date_s./film/film_regional_release_date/film_release_region	/m/03ryn
/m/05pcn59	/award/award_category/nominees./award/award_nomination/nominated_for	/m/03hmt9b
/m/04pg29	/people/person/profession	/m/02jknp
/m/053tj7	/film/film/personal_appearances./film/personal_film_appearance/person	/m/03pvt
/m/0c5vh	/people/person/profession	/m/018gz8
/m/04x4gj	/tv/tv_program/genre	/m/01hmnh
/m/07y_r	/people/person/profession	/m/02jknp
/m/01v40wd	/award/award_nominee/award_nominations./award/award_nomination/award_nominee	/m/013w7j
/m/01f7d	/award/award_category/disciplines_or_subjects	/m/02xlf
/m/01flv_	/film/film/release_date_s./film/film_regional_release_date/film_release_distribution_medium	/m/029j_
/m/01w5m	/education/educational_institution/students_graduates./education/education/major_field_of_study	/m/036nz
/m/04xvlr	/media_common/netflix_genre/titles	/m/02prwdh
/m/0gqng	/award/award_category/nominees./award/award_nomination/nominated_for	/m/091z_p
/m/09_94	/olympics/olympic_sport/athletes./olympics/olympic_athlete_affiliation/country	/m/06t8v
/m/060bp	/government/government_office_category/officeholders./government/government_position_held/jurisdiction_of_office	/m/04v3q
/m/019v9k	/education/educational_degree/people_with_this_degree./education/education/institution	/m/02rg_4
/m/03_9hm	/sports/sports_team/sport	/m/02vx4
/m/01g4zr	/award/award_nominee/award_nominations./award/award_nomination/award	/m/0gq_d
/m/03v40v	/award/award_nominee/award_nominations./award/award_nomination/award	/m/0cc8l6d
/m/03cfjg	/award/award_nominee/award_nominations./award/award_nomination/award_nominee	/m/01lmj3q
/m/024n3z	/award/award_winner/awards_won./award/award_honor/award_winner	/m/0d02km
/m/067ghz	/film/film/release_date_s./film/film_regional_release_date/film_release_region	/m/01ppq
/m/027s39y	/film/film/genre	/m/06cvj
/m/03x_k5m	/film/film_distributor/films_distributed./film/film_film_distributor_relationship/film	/m/06zn1c
/m/01wy6	/music/performance_role/regular_performances./music/group_membership/role	/m/03qmg1
/m/086nl7	/people/person/places_lived./people/place_lived/location	/m/013kcv
/m/04hs7d	/tv/tv_program/genre	/m/03k9fj
/m/01hcvm	/music/genre/artists	/m/0mgcr
/m/06f0dc	/government/legislative_session/members./government/government_position_held/district_represented	/m/0hjy
/m/07f_t4	/film/film/genre	/m/04pbhw
/m/059j2	/location/location/contains	/m/0q19t
/m/0dzlbx	/film/film/executive_produced_by	/m/02xnjd
/m/04glr5h	/tv/tv_writer/tv_programs./tv/tv_program_writer_relationship/tv_program	/m/02rzdcp
/m/01gb54	/film/film_distributor/films_distributed./film/film_film_distributor_relationship/film	/m/0435vm
/m/03459x	/film/film/genre	/m/01jfsb
/m/0ddbjy4	/film/film/genre	/m/02kdv5l
/m/03yf4d	/people/person/profession	/m/094hwz
/m/0l6wj	/award/award_nominee/award_nominations./award/award_nomination/nominated_for	/m/0bmpm
/m/0nmj	/location/location/contains	/m/03v6t
/m/019mdt	/sports/sports_team/colors	/m/083jv
/m/0jbs5	/base/popstra/location/vacationers./base/popstra/vacation_choice/vacationer	/m/01g23m
/m/056rgc	/base/popstra/celebrity/dated./base/popstra/dated/participant	/m/02d4ct
/m/04njml	/award/award_category/winners./award/award_honor/award_winner	/m/01mh8zn
/m/0ks67	/education/educational_institution/students_graduates./education/education/student	/m/01jqr_5
/m/0kfv9	/tv/tv_program/regular_cast./tv/regular_tv_appearance/actor	/m/059gkk
/m/028knk	/people/person/gender	/m/02zsn
/m/0jm_	/film/film_subject/films	/m/023gxx
/m/07lz9l	/people/person/place_of_birth	/m/02_286
/m/0456xp	/people/person/places_lived./people/place_lived/location	/m/02_286
/m/03q3x5	/people/person/place_of_birth	/m/0cr3d
/m/03zrc_	/base/x2010fifaworldcupsouthafrica/world_cup_squad/current_world_cup_squad./base/x2010fifaworldcupsouthafrica/current_world_cup_squad/current_club	/m/01xbp7
/m/02rjjll	/award/award_ceremony/awards_presented./award/award_honor/award_winner	/m/01bpc9
/m/026bt_h	/american_football/football_team/current_roster./sports/sports_team_roster/position	/m/01r3hr
/m/05fly	/location/location/adjoin_s./location/adjoining_relationship/adjoins	/m/0g39h
/m/060c4	/organization/role/leaders./organization/leadership/organization	/m/01rtm4
/m/01gvyp	/film/actor/film./film/performance/film	/m/0n6ds
/m/04ljl_l	/award/award_category/nominees./award/award_nomination/nominated_for	/m/082scv
/m/03khn	/location/location/adjoin_s./location/adjoining_relationship/adjoins	/m/0c75w
/m/03m6t5	/base/americancomedy/celebrity_impressionist/celebrities_impersonated	/m/01htxr
/m/0g5838s	/film/film/release_date_s./film/film_regional_release_date/film_release_region	/m/03h64
/m/05r5c	/music/performance_role/regular_performances./music/group_membership/group	/m/02r3zy
/m/06gjk9	/film/film/production_companies	/m/01gb54
/m/03gqb0k	/american_football/football_team/current_roster./sports/sports_team_roster/position	/m/08ns5s
/m/060c4	/business/job_title/people_with_this_title./business/employment_tenure/company	/m/04sv4
/m/086nl7	/people/person/religion	/m/04pk9
/m/02_2v2	/tv/tv_producer/programs_produced./tv/tv_producer_term/program	/m/0gj50
/m/064t9	/music/genre/artists	/m/01wgfp6
/m/04p3w	/people/cause_of_death/people	/m/01v3bn
/m/016kft	/film/actor/film./film/performance/film	/m/021gzd
/m/0bz5v2	/award/award_nominee/award_nominations./award/award_nomination/nominated_for	/m/01j7mr
/m/0bx0l	/film/film/release_date_s./film/film_regional_release_date/film_release_region	/m/0k6nt
/m/07c52	/media_common/netflix_genre/titles	/m/06qwh
/m/0gq_v	/award/award_category/nominees./award/award_nomination/nominated_for	/m/0m_q0
/m/07s846j	/film/film/release_date_s./film/film_regional_release_date/film_release_region	/m/0345h
/m/03fw60	/award/award_nominee/award_nominations./award/award_nomination/award	/m/03rbj2
/m/016dmx	/award/award_nominee/award_nominations./award/award_nomination/nominated_for	/m/03t79f
/m/0ksrf8	/award/award_nominee/award_nominations./award/award_nomination/award_nominee	/m/03mg35
/m/05bnp0	/film/actor/film./film/performance/film	/m/0g7pm1
/m/01mqz0	/award/award_nominee/award_nominations./award/award_nomination/award	/m/02ppm4q
/m/019v9k	/education/educational_degree/people_with_this_degree./education/education/major_field_of_study	/m/02bjrlw
/m/0d0kn	/olympics/olympic_participating_country/medals_won./olympics/olympic_medal_honor/olympics	/m/0kbvb
/m/02bn_p	/government/legislative_session/members./government/government_position_held/legislative_sessions	/m/06f0dc
/m/0cpllql	/film/film/other_crew./film/film_crew_gig/film_crew_role	/m/094hwz
/m/026kq4q	/award/award_ceremony/awards_presented./award/award_honor/award_winner	/m/0cj8x
/m/024rdh	/film/film_distributor/films_distributed./film/film_film_distributor_relationship/film	/m/0gvvm6l
/m/0kjgl	/award/award_nominee/award_nominations./award/award_nomination/award_nominee	/m/01tnxc
/m/05_6_y	/soccer/football_player/current_team./sports/sports_team_roster/team	/m/0j47s
/m/02x1z2s	/award/award_category/winners./award/award_honor/ceremony	/m/09bymc
/m/02lfcm	/award/award_winner/awards_won./award/award_honor/award_winner	/m/0436f4
/m/0flsf	/base/biblioness/bibs_location/country	/m/059j2
/m/02k6hp	/people/cause_of_death/people	/m/03d1y3
/m/09qs08	/award/award_category/nominees./award/award_nomination/nominated_for	/m/02r1ysd
/m/034x61	/award/award_nominee/award_nominations./award/award_nomination/award	/m/05pcn59
/m/0_816	/award/award_winning_work/awards_won./award/award_honor/honored_for	/m/026390q
/m/05qfh	/education/field_of_study/students_majoring./education/education/major_field_of_study	/m/01mkq
/m/02114t	/people/person/places_lived./people/place_lived/location	/m/0cc56
/m/0gm2_0	/award/award_winning_work/awards_won./award/award_honor/award_winner	/m/0d6484
/m/064jjy	/people/person/place_of_birth	/m/02_286
/m/060c4	/government/government_office_category/officeholders./government/government_position_held/jurisdiction_of_office	/m/0169t
/m/0d060g	/olympics/olympic_participating_country/medals_won./olympics/olympic_medal_honor/olympics	/m/018qb4
/m/0237jb	/award/award_nominee/award_nominations./award/award_nomination/award	/m/02n9nmz
/m/03h0byn	/film/film/release_date_s./film/film_regional_release_date/film_release_distribution_medium	/m/029j_
/m/0b_c7	/people/person/place_of_birth	/m/031y2
/m/073h5b	/award/award_ceremony/awards_presented./award/award_honor/award_winner	/m/02h761
/m/01f492	/base/popstra/celebrity/canoodled./base/popstra/canoodled/participant	/m/01g23m
/m/026dd2b	/award/award_winner/awards_won./award/award_honor/award_winner	/m/026dg51
/m/026bfsh	/tv/tv_program/regular_cast./tv/regular_tv_appearance/actor	/m/02yygk
/m/04wqr	/award/award_nominee/award_nominations./award/award_nomination/nominated_for	/m/0k4f3
/m/02mjf2	/base/popstra/celebrity/dated./base/popstra/dated/participant	/m/0794g
/m/027m67	/award/award_winning_work/awards_won./award/award_honor/award_winner	/m/03cp7b3
/m/01lmj3q	/award/award_winner/awards_won./award/award_honor/award_winner	/m/03cfjg
/m/09j028	/soccer/football_player/current_team./sports/sports_team_roster/team	/m/025txtg
/m/0crd8q6	/award/award_winning_work/awards_won./award/award_honor/award	/m/057xs89
/m/041c4	/people/person/profession	/m/018gz8
/m/01jfsb	/media_common/netflix_genre/titles	/m/0dgq_kn
/m/019v9k	/education/educational_degree/people_with_this_degree./education/education/institution	/m/015q1n
/m/07gyv	/olympics/olympic_sport/athletes./olympics/olympic_athlete_affiliation/country	/m/06t8v
/m/03cl8lb	/award/award_winner/awards_won./award/award_honor/award_winner	/m/026dg51
/m/047msdk	/film/film/language	/m/06mp7
/m/06f0dc	/government/legislative_session/members./government/government_position_held/district_represented	/m/02xry
/m/04kjrv	/people/person/spouse_s./people/marriage/type_of_union	/m/01g63y
/m/0320fn	/award/award_winning_work/awards_won./award/award_honor/award	/m/02x4sn8
/m/05th69	/organization/organization/child./organization/organization_relationship/child	/m/0b275x
/m/0k__z	/education/educational_institution/students_graduates./education/education/student	/m/05szp
/m/01f_mw	/film/film_distributor/films_distributed./film/film_film_distributor_relationship/film	/m/01rnly
/m/02ck1	/people/person/place_of_birth	/m/06pr6
/m/04v048	/people/person/profession	/m/02jknp
/m/058frd	/award/award_nominee/award_nominations./award/award_nomination/award_nominee	/m/02vntj
/m/0272_vz	/film/film/executive_produced_by	/m/0bxtg
/m/03d34x8	/tv/tv_program/program_creator	/m/03y9ccy
/m/01k7b0	/film/film/genre	/m/01g6gs
/m/03_8r	/olympics/olympic_sport/athletes./olympics/olympic_athlete_affiliation/country	/m/027rn
/m/06j0md	/award/award_nominee/award_nominations./award/award_nomination/award_nominee	/m/0721cy
/m/0blpg	/film/film/release_date_s./film/film_regional_release_date/film_release_region	/m/03_3d
/m/01pv91	/film/film/genre	/m/01hmnh
/m/0bksh	/film/actor/film./film/performance/film	/m/05dss7
/m/042v_gx	/music/performance_role/regular_performances./music/group_membership/group	/m/0dvqq
/m/0267wwv	/film/film/music	/m/0f8pz
/m/01tt43d	/award/award_nominee/award_nominations./award/award_nomination/award_nominee	/m/04pqqb
/m/0bsjcw	/award/award_category/winners./award/award_honor/award_winner	/m/02__7n
/m/06lxn	/music/artist/origin	/m/02_286
/m/05cgy8	/award/award_nominee/award_nominations./award/award_nomination/award	/m/02x4sn8
/m/0gr42	/award/award_category/nominees./award/award_nomination/nominated_for	/m/0hwpz
/m/019v9k	/education/educational_degree/people_with_this_degree./education/education/institution	/m/02yxjs
/m/07gql	/music/instrument/instrumentalists	/m/01wwvt2
/m/059j2	/location/country/second_level_divisions	/m/06hdk
/m/0sw6g	/people/person/spouse_s./people/marriage/spouse	/m/0c4f4
/m/026t6	/music/instrument/instrumentalists	/m/02qfhb
/m/05r5c	/music/instrument/instrumentalists	/m/0kvrb
/m/01gtcc	/government/legislative_session/members./government/government_position_held/district_represented	/m/03v0t
/m/025p38	/people/person/profession	/m/0d1pc
/m/0j871	/music/performance_role/regular_performances./music/group_membership/role	/m/05148p4
/m/03gyp30	/award/award_ceremony/awards_presented./award/award_honor/award_winner	/m/0pz7h
/m/015np0	/people/deceased_person/place_of_death	/m/0nbfm
/m/014g22	/people/person/places_lived./people/place_lived/location	/m/0cc56
/m/01pcz9	/award/award_winner/awards_won./award/award_honor/award_winner	/m/011zd3
/m/0d02km	/award/award_winner/awards_won./award/award_honor/award_winner	/m/016ywr
/m/0181dw	/music/record_label/artist	/m/01l47f5
/m/0ddj0x	/film/film/release_date_s./film/film_regional_release_date/film_release_region	/m/01mjq
/m/0cqgl9	/award/award_category/nominees./award/award_nomination/nominated_for	/m/0bbm7r
/m/014vk4	/people/person/place_of_birth	/m/0lphb
/m/04lgybj	/government/legislative_session/members./government/government_position_held/district_represented	/m/0h5qxv
/m/02j3w	/base/petbreeds/city_with_dogs/top_breeds./base/petbreeds/dog_city_relationship/dog_breed	/m/0km3f
/m/05sq0m	/award/award_winner/awards_won./award/award_honor/award_winner	/m/016sp_
/m/02bqn1	/government/legislative_session/members./government/government_position_held/district_represented	/m/03s0w
/m/0436f4	/award/award_winner/awards_won./award/award_honor/award_winner	/m/02lfcm
/m/07ym6ss	/award/award_nominee/award_nominations./award/award_nomination/award	/m/0cjyzs
/m/099cng	/award/award_category/nominees./award/award_nomination/nominated_for	/m/0294mx
/m/09pmkv	/location/location/contains	/m/0g6xq
/m/01grpq	/government/legislative_session/members./government/government_position_held/district_represented	/m/06btq
/m/08hmch	/film/film/genre	/m/0btmb
/m/0g5pvv	/film/film/prequel	/m/01kf4tt
/m/06mzp	/olympics/olympic_participating_country/athletes./olympics/olympic_athlete_affiliation/olympics	/m/01f1kd
/m/0278x6s	/film/actor/film./film/performance/film	/m/0404j37
/m/06x58	/film/actor/film./film/performance/film	/m/09cr8
/m/060c4	/business/job_title/people_with_this_title./business/employment_tenure/company	/m/0sxdg
/m/0h3mrc	/award/award_nominee/award_nominations./award/award_nomination/award	/m/03ccq3s
/m/060bp	/government/government_office_category/officeholders./government/government_position_held/jurisdiction_of_office	/m/0jt3tjf
/m/05r5c	/music/instrument/instrumentalists	/m/01wmjkb
/m/01fsv9	/organization/organization/headquarters./location/mailing_address/citytown	/m/043yj
/m/0358x_	/award/award_winning_work/awards_won./award/award_honor/award_winner	/m/026dg51
/m/07jjt	/olympics/olympic_sport/athletes./olympics/olympic_athlete_affiliation/country	/m/0d04z6
/m/07bdd_	/award/award_category/nominees./award/award_nomination/nominated_for	/m/07sp4l
/m/0c0zq	/film/film/release_date_s./film/film_regional_release_date/film_release_distribution_medium	/m/029j_
/m/026fs38	/film/film/genre	/m/04xvlr
/m/018wrk	/user/jg/default_domain/olympic_games/sports	/m/02vx4
/m/01_d4	/location/hud_county_place/county	/m/0nvt9
/m/0d060g	/location/location/contains	/m/0pmpl
/m/03bww6	/tv/tv_program/regular_cast./tv/regular_tv_appearance/actor	/m/01wgfp6
/m/01w1ywm	/people/deceased_person/place_of_death	/m/02_286
/m/04kzqz	/film/film/genre	/m/02kdv5l
/m/02md2d	/award/award_winning_work/awards_won./award/award_honor/award	/m/0bdw6t
/m/0565cz	/award/award_nominee/award_nominations./award/award_nomination/award_nominee	/m/0136pk
/m/02ddq4	/award/award_category/winners./award/award_honor/ceremony	/m/02rjjll
/m/024n3z	/award/award_nominee/award_nominations./award/award_nomination/award_nominee	/m/015t7v
/m/051m56	/award/award_winner/awards_won./award/award_honor/award_winner	/m/01lmj3q
/m/0d_rw	/tv/tv_program/genre	/m/06n90
/m/0pmw9	/music/group_member/membership./music/group_membership/role	/m/05148p4
/m/011yfd	/film/film/genre	/m/04xvlr
/m/020h2v	/film/film_distributor/films_distributed./film/film_film_distributor_relationship/film	/m/0ds3t5x
/m/07s6prs	/award/award_nominee/award_nominations./award/award_nomination/award_nominee	/m/077yk0
/m/01hvjx	/film/film/release_date_s./film/film_regional_release_date/film_release_distribution_medium	/m/029j_
/m/0bt7ws	/award/award_winner/awards_won./award/award_honor/award_winner	/m/0h3mrc
/m/02ltg3	/base/x2010fifaworldcupsouthafrica/world_cup_squad/current_world_cup_squad./base/x2010fifaworldcupsouthafrica/current_world_cup_squad/current_club	/m/03x6m
/m/03twd6	/film/film/genre	/m/03k9fj
/m/01bfjy	/tv/tv_network/programs./tv/tv_network_duration/program	/m/03lyp4
/m/0gd0c7x	/film/film/release_date_s./film/film_regional_release_date/film_release_distribution_medium	/m/029j_
/m/025y9fn	/award/award_nominee/award_nominations./award/award_nomination/award_nominee	/m/07lwsz
/m/0d02km	/award/award_nominee/award_nominations./award/award_nomination/award_nominee	/m/024n3z
/m/01hmnh	/media_common/netflix_genre/titles	/m/0h1v19
/m/054g1r	/film/film_distributor/films_distributed./film/film_film_distributor_relationship/film	/m/03q0r1
/m/02jxbw	/film/film/release_date_s./film/film_regional_release_date/film_release_distribution_medium	/m/029j_
/m/0bz5v2	/tv/tv_writer/tv_programs./tv/tv_program_writer_relationship/tv_program	/m/01j7mr
/m/0jsf6	/award/award_winning_work/awards_won./award/award_honor/award_winner	/m/0cdf37
/m/07r_dg	/film/actor/film./film/performance/film	/m/0jjy0
/m/014zcr	/award/award_winner/awards_won./award/award_honor/award_winner	/m/01t6xz
/m/03f6fl0	/music/artist/origin	/m/0ygbf
/m/023gxx	/film/film/release_date_s./film/film_regional_release_date/film_release_region	/m/09pmkv
/m/05bnp0	/film/actor/film./film/performance/film	/m/07kdkfj
/m/0h3mrc	/award/award_nominee/award_nominations./award/award_nomination/award_nominee	/m/04zkj5
/m/0dgq80b	/film/film/release_date_s./film/film_regional_release_date/film_release_region	/m/0345h
/m/01gtcc	/government/legislative_session/members./government/government_position_held/legislative_sessions	/m/03rl1g
/m/0bm2x	/award/award_winning_work/awards_won./award/award_honor/award	/m/02z13jg
/m/01_d4	/location/location/contains	/m/065r8g
/m/0ddj0x	/film/film/written_by	/m/030tj5
/m/06f0dc	/government/legislative_session/members./government/government_position_held/district_represented	/m/05fky
/m/03f68r6	/people/deceased_person/place_of_death	/m/071vr
/m/02lg9w	/award/award_nominee/award_nominations./award/award_nomination/award_nominee	/m/02lgj6
/m/0gt1k	/film/film/release_date_s./film/film_regional_release_date/film_release_region	/m/03_3d
/m/01cf5	/education/educational_institution/students_graduates./education/education/major_field_of_study	/m/05qfh
/m/0f3m1	/film/film/genre	/m/02kdv5l
/m/026_dcw	/award/award_winner/awards_won./award/award_honor/award_winner	/m/0b7t3p
/m/047csmy	/film/film/produced_by	/m/05mvd62
/m/0136pk	/award/award_nominee/award_nominations./award/award_nomination/award	/m/02ddq4
/m/02t8gf	/music/genre/artists	/m/0232lm
/m/02k21g	/people/person/profession	/m/018gz8
/m/02j62	/education/field_of_study/students_majoring./education/education/major_field_of_study	/m/04_tv
/m/044n3h	/award/award_nominee/award_nominations./award/award_nomination/award_nominee	/m/01sl1q
/m/05r5c	/music/instrument/instrumentalists	/m/09889g
/m/03_wm6	/film/film/release_date_s./film/film_regional_release_date/film_release_distribution_medium	/m/029j_
/m/0bdx29	/award/award_category/nominees./award/award_nomination/nominated_for	/m/03d34x8
/m/01f7dd	/award/award_nominee/award_nominations./award/award_nomination/nominated_for	/m/012s1d
/m/06zn1c	/film/film/genre	/m/03k9fj
/m/01q6bg	/film/actor/film./film/performance/film	/m/01s9vc
/m/01fxg8	/education/educational_institution/school_type	/m/052q4j
/m/03y3bp7	/tv/tv_program/genre	/m/0hcr
/m/02x2jl_	/film/film/production_companies	/m/02j_j0
/m/057_yx	/award/award_nominee/award_nominations./award/award_nomination/award_nominee	/m/034zc0
/m/02g2wv	/award/award_category/nominees./award/award_nomination/nominated_for	/m/07f_t4
/m/01tl50z	/film/actor/film./film/performance/film	/m/0cqnss
/m/01wy6	/music/performance_role/track_performances./music/track_contribution/role	/m/03t22m
/m/0160nk	/education/university/fraternities_and_sororities	/m/035tlh
/m/04jplwp	/award/award_winning_work/awards_won./award/award_honor/award_winner	/m/01g23m
/m/02vjzr	/music/genre/artists	/m/016h9b
/m/0g4vmj8	/film/film/release_date_s./film/film_regional_release_date/film_release_region	/m/0d060g
/m/01q6bg	/award/award_nominee/award_nominations./award/award_nomination/award_nominee	/m/0c6qh
/m/05bnp0	/award/award_nominee/award_nominations./award/award_nomination/award_nominee	/m/03n_7k
/m/02114t	/base/popstra/celebrity/dated./base/popstra/dated/participant	/m/01g0jn
/m/0221zw	/award/ranked_item/appears_in_ranked_lists./award/ranking/list	/m/05glt
/m/01_j71	/award/award_nominee/award_nominations./award/award_nomination/award	/m/0bdx29
/m/059y0	/people/person/places_lived./people/place_lived/location	/m/0k6nt
/m/02d4ct	/award/award_nominee/award_nominations./award/award_nomination/nominated_for	/m/04jwly
/m/0cms7f	/award/award_winner/awards_won./award/award_honor/award_winner	/m/05xpms
/m/089j8p	/film/film/release_date_s./film/film_regional_release_date/film_release_region	/m/03_3d
/m/02ppm4q	/award/award_category/nominees./award/award_nomination/nominated_for	/m/0yyn5
/m/01qnfc	/people/person/nationality	/m/03_3d
/m/0fpgp26	/film/film/release_date_s./film/film_regional_release_date/film_release_region	/m/0345h
/m/0gltv	/film/film/genre	/m/02kdv5l
/m/08xvpn	/film/film/release_date_s./film/film_regional_release_date/film_release_distribution_medium	/m/029j_
/m/027m67	/film/film/release_date_s./film/film_regional_release_date/film_release_region	/m/0345h
/m/04sskp	/tv/tv_program/genre	/m/01hmnh
/m/08b0cj	/soccer/football_player/current_team./sports/sports_team_roster/team	/m/03h0k1
/m/04j_gs	/tv/tv_personality/tv_regular_appearances./tv/tv_regular_personal_appearance/program	/m/01j7mr
/m/0drc1	/people/deceased_person/place_of_death	/m/02_286
/m/054g1r	/film/film_distributor/films_distributed./film/film_film_distributor_relationship/film	/m/023gxx
/m/06by7	/music/genre/artists	/m/03qmj9
/m/01jfsb	/media_common/netflix_genre/titles	/m/0127ps
/m/02lnbg	/music/genre/artists	/m/09qr6
/m/0gq_v	/award/award_category/nominees./award/award_nomination/nominated_for	/m/02q5g1z
/m/01gsvb	/government/legislative_session/members./government/government_position_held/district_represented	/m/05tbn
/m/05tg3	/sports/sports_team/roster./american_football/football_roster_position/position	/m/01r3hr
/m/0p9sw	/award/award_category/nominees./award/award_nomination/nominated_for	/m/0bl5c
/m/034cj9	/people/deceased_person/place_of_death	/m/02_286
/m/014zcr	/award/award_nominee/award_nominations./award/award_nomination/award	/m/02n9nmz
/m/011x_4	/film/film/featured_film_locations	/m/01_d4
/m/02cg7g	/government/legislative_session/members./government/government_position_held/district_represented	/m/01x73
/m/02bkg	/olympics/olympic_sport/athletes./olympics/olympic_athlete_affiliation/country	/m/07t21
/m/01ky7c	/education/educational_institution/students_graduates./education/education/major_field_of_study	/m/01mkq
/m/0ch3qr1	/award/award_winning_work/awards_won./award/award_honor/award	/m/07bdd_
/m/04xvlr	/media_common/netflix_genre/titles	/m/048xyn
/m/01vsy7t	/award/award_nominee/award_nominations./award/award_nomination/award_nominee	/m/019x62
/m/0jrv_	/music/genre/artists	/m/020hh3
/m/02lgj6	/award/award_winner/awards_won./award/award_honor/award_winner	/m/02lfcm
/m/0d608	/music/group_member/membership./music/group_membership/group	/m/01v0sx2
/m/07_l6	/music/performance_role/track_performances./music/track_contribution/role	/m/026t6
/m/03rbzn	/olympics/olympic_sport/athletes./olympics/olympic_athlete_affiliation/country	/m/03_3d
/m/01s73z	/organization/organization/headquarters./location/mailing_address/state_province_region	/m/05tbn
/m/04k9y6	/film/film/music	/m/01x6v6
/m/03wbzp	/people/person/place_of_birth	/m/013h9
/m/01s9vc	/film/film/genre	/m/01jfsb
/m/04ljl_l	/award/award_category/nominees./award/award_nomination/nominated_for	/m/01mszz
/m/0gjw_	/base/culturalevent/event/entity_involved	/m/027qpc
/m/077yk0	/award/award_winner/awards_won./award/award_honor/award_winner	/m/07m77x
/m/0m491	/film/film/release_date_s./film/film_regional_release_date/film_release_region	/m/0k6nt
/m/06cqb	/music/genre/artists	/m/07h76
/m/051_y	/film/film_subject/films	/m/04jn6y7
/m/027s39y	/film/film/story_by	/m/05jcn8
/m/0mzkr	/music/record_label/artist	/m/01vw87c
/m/03rbj2	/award/award_category/winners./award/award_honor/award_winner	/m/03fw60
/m/09v4bym	/award/award_category/nominees./award/award_nomination/nominated_for	/m/0mb8c
/m/06kl78	/film/film/genre	/m/0glj9q
/m/0bx_hnp	/film/film/release_date_s./film/film_regional_release_date/film_release_distribution_medium	/m/029j_
/m/01vsy95	/award/award_nominee/award_nominations./award/award_nomination/award	/m/025m98
/m/0278x6s	/award/award_nominee/award_nominations./award/award_nomination/nominated_for	/m/0404j37
/m/07s6prs	/award/award_winner/awards_won./award/award_honor/award_winner	/m/080knyg
/m/06n3y	/location/location/contains	/m/06nnj
/m/0cms7f	/award/award_winner/awards_won./award/award_honor/award_winner	/m/04zkj5
/m/09cxm4	/film/film/genre	/m/06n90
/m/04xvlr	/media_common/netflix_genre/titles	/m/034r25
/m/0krdk	/business/job_title/people_with_this_title./business/employment_tenure/company	/m/01n073
/m/09zmys	/award/award_nominee/award_nominations./award/award_nomination/award	/m/027s4dn
/m/01507p	/people/person/places_lived./people/place_lived/location	/m/0dclg
/m/0c0nhgv	/award/award_winning_work/awards_won./award/award_honor/award	/m/02w9sd7
/m/0cmf0m0	/film/film/release_date_s./film/film_regional_release_date/film_release_region	/m/05sb1
/m/0k9ts	/base/schemastaging/organization_extra/phone_number./base/schemastaging/phone_sandbox/service_location	/m/0d060g
/m/0170pk	/award/award_nominee/award_nominations./award/award_nomination/award	/m/02w9sd7
/m/03rl1g	/government/legislative_session/members./government/government_position_held/legislative_sessions	/m/01gtcc
/m/07q68q	/people/person/nationality	/m/0d060g
/m/02x4wr9	/award/award_category/nominees./award/award_nomination/nominated_for	/m/0170yd
/m/011_3s	/people/person/place_of_birth	/m/02dtg
/m/06by7	/music/genre/artists	/m/044mfr
/m/0ymcz	/organization/endowed_organization/endowment./measurement_unit/dated_money_value/currency	/m/01nv4h
/m/05tgks	/film/film/release_date_s./film/film_regional_release_date/film_release_distribution_medium	/m/029j_
/m/02mjf2	/base/popstra/celebrity/friendship./base/popstra/friendship/participant	/m/0794g
/m/043tvp3	/film/film/release_date_s./film/film_regional_release_date/film_release_region	/m/09pmkv
/m/01vsykc	/award/award_nominee/award_nominations./award/award_nomination/award	/m/02f79n
/m/0c33pl	/award/award_nominee/award_nominations./award/award_nomination/award	/m/04fgkf_
/m/019v9k	/education/educational_degree/people_with_this_degree./education/education/institution	/m/01q2sk
/m/06by7	/music/genre/artists	/m/01vrt_c
/m/04v8x9	/award/award_winning_work/awards_won./award/award_honor/award	/m/0gr42
/m/07jjt	/olympics/olympic_sport/athletes./olympics/olympic_athlete_affiliation/country	/m/07t21
/m/01my_c	/award/award_nominee/award_nominations./award/award_nomination/award_nominee	/m/05szp
/m/045r_9	/award/award_winning_work/awards_won./award/award_honor/award	/m/07kjk7c
/m/01_1kk	/sports/sports_team/sport	/m/02vx4
/m/05r5c	/music/instrument/instrumentalists	/m/09hnb
/m/011zd3	/award/award_winner/awards_won./award/award_honor/award_winner	/m/01438g
/m/03_8r	/olympics/olympic_sport/athletes./olympics/olympic_athlete_affiliation/country	/m/01699
/m/01nln	/olympics/olympic_participating_country/athletes./olympics/olympic_athlete_affiliation/olympics	/m/0kbvb
/m/0ds3t5x	/film/film/release_date_s./film/film_regional_release_date/film_release_region	/m/04v3q
/m/07w21	/influence/influence_node/influenced_by	/m/0bk5r
/m/05148p4	/music/performance_role/track_performances./music/track_contribution/role	/m/05r5c
/m/011yfd	/film/film/language	/m/02bjrlw
/m/0dclg	/travel/travel_destination/climate./travel/travel_destination_monthly_climate/month	/m/06vkl
/m/0jnh	/film/film_subject/films	/m/0gltv
/m/09v0p2c	/award/award_ceremony/awards_presented./award/award_honor/honored_for	/m/06_x996
/m/02fj8n	/film/film/executive_produced_by	/m/04hw4b
/m/02bqn1	/government/legislative_session/members./government/government_position_held/legislative_sessions	/m/070mff
/m/02ndbd	/film/actor/film./film/performance/film	/m/04g73n
/m/02yv6b	/music/genre/artists	/m/0gcs9
/m/044mrh	/award/award_nominee/award_nominations./award/award_nomination/award_nominee	/m/044n3h
/m/04t6fk	/film/film/executive_produced_by	/m/01wyy_
/m/0d34_	/sports/sports_team_location/teams	/m/0bk17k
/m/02lgj6	/award/award_winner/awards_won./award/award_honor/award_winner	/m/02lg9w
/m/01wv9p	/people/person/place_of_birth	/m/02_286
/m/0bl60p	/award/award_nominee/award_nominations./award/award_nomination/award_nominee	/m/02lfcm
/m/0m2fr	/location/location/adjoin_s./location/adjoining_relationship/adjoins	/m/0f6_j
/m/0p9sw	/award/award_category/nominees./award/award_nomination/nominated_for	/m/01_mdl
/m/07yp0f	/award/award_nominee/award_nominations./award/award_nomination/award_nominee	/m/0hvb2
/m/01jrp0	/people/person/profession	/m/02jknp
/m/01kv4mb	/award/award_nominee/award_nominations./award/award_nomination/award_nominee	/m/03bnv
/m/064t9	/music/genre/artists	/m/0133x7
/m/01jfsb	/media_common/netflix_genre/titles	/m/01d259
/m/01wjrn	/film/actor/film./film/performance/film	/m/0g22z
/m/024tcq	/government/legislative_session/members./government/government_position_held/district_represented	/m/03v0t
/m/01mqh5	/award/award_nominee/award_nominations./award/award_nomination/award	/m/05pcn59
/m/04xvlr	/media_common/netflix_genre/titles	/m/04jwly
/m/0p9sw	/award/award_category/nominees./award/award_nomination/nominated_for	/m/0404j37
/m/0fn2g	/travel/travel_destination/climate./travel/travel_destination_monthly_climate/month	/m/0ll3
/m/09k56b7	/film/film/featured_film_locations	/m/02_286
/m/0gq_d	/award/award_category/winners./award/award_honor/ceremony	/m/0fy59t
/m/04p3w	/people/cause_of_death/people	/m/012wg
/m/032nwy	/award/award_nominee/award_nominations./award/award_nomination/award	/m/025mbn
/m/017s11	/film/film_distributor/films_distributed./film/film_film_distributor_relationship/film	/m/0gy2y8r
/m/026n998	/tv/tv_writer/tv_programs./tv/tv_program_writer_relationship/tv_program	/m/0gj50
/m/08ct6	/film/film/genre	/m/073_6
/m/0cqgl9	/award/award_category/winners./award/award_honor/award_winner	/m/0dvld
/m/017s11	/film/film_distributor/films_distributed./film/film_film_distributor_relationship/film	/m/048xyn
/m/02fn5	/film/actor/film./film/performance/film	/m/0191n
/m/0l6m5	/user/jg/default_domain/olympic_games/sports	/m/07_53
/m/011_3s	/people/person/spouse_s./people/marriage/type_of_union	/m/01g63y
/m/02zd460	/education/educational_institution/students_graduates./education/education/student	/m/05qzv
/m/02_wxh	/tv/tv_personality/tv_regular_appearances./tv/tv_regular_personal_appearance/program	/m/0cpz4k
/m/03f2_rc	/award/award_nominee/award_nominations./award/award_nomination/nominated_for	/m/01gvsn
/m/0jjy0	/film/film/release_date_s./film/film_regional_release_date/film_release_region	/m/059j2
/m/03v0t	/location/location/partially_contains	/m/05lx3
/m/080knyg	/people/person/gender	/m/02zsn
/m/02n1p5	/people/person/languages	/m/07c9s
/m/07gp9	/film/film/other_crew./film/film_crew_gig/film_crew_role	/m/02_n3z
/m/03tf_h	/people/person/profession	/m/01d_h8
/m/02yr3z	/organization/organization/headquarters./location/mailing_address/state_province_region	/m/05tbn
/m/02fn5	/award/award_nominee/award_nominations./award/award_nomination/award	/m/02x73k6
/m/03k9fj	/media_common/netflix_genre/titles	/m/020fcn
/m/02xry	/location/location/contains	/m/0jgj7
/m/0g768	/music/record_label/artist	/m/0565cz
/m/01jfsb	/media_common/netflix_genre/titles	/m/035zr0
/m/0gd0c7x	/film/film/genre	/m/06n90
/m/01twmp	/people/person/nationality	/m/0d060g
/m/026kmvf	/people/person/profession	/m/0gl2ny2
/m/0208wk	/award/award_category/winners./award/award_honor/award_winner	/m/07w21
/m/01c744	/location/location/adjoin_s./location/adjoining_relationship/adjoins	/m/0lfyd
/m/01vsyjy	/music/group_member/membership./music/group_membership/group	/m/04k05
/m/01pcz9	/award/award_nominee/award_nominations./award/award_nomination/award_nominee	/m/05sdxx
/m/0jsf6	/film/film/film_production_design_by	/m/0cdf37
/m/0gs6vr	/people/person/places_lived./people/place_lived/location	/m/02_286
/m/0gr42	/award/award_category/winners./award/award_honor/ceremony	/m/0fy59t
/m/0190xp	/music/genre/artists	/m/016m5c
/m/09fb5	/base/popstra/celebrity/friendship./base/popstra/friendship/participant	/m/02fn5
/m/02h3d1	/award/award_category/winners./award/award_honor/ceremony	/m/01bx35
/m/01lmj3q	/award/award_nominee/award_nominations./award/award_nomination/award_nominee	/m/016srn
/m/015wnl	/people/person/spouse_s./people/marriage/type_of_union	/m/01g63y
/m/01yznp	/people/person/profession	/m/018gz8
/m/06gp3f	/award/award_nominee/award_nominations./award/award_nomination/award_nominee	/m/05b_7n
/m/05b2f_k	/award/award_winner/awards_won./award/award_honor/award_winner	/m/01cbt3
/m/02gf_l	/film/actor/film./film/performance/film	/m/0ds2n
/m/0_vn7	/location/location/contains	/m/01qgr3
/m/03cz4j	/people/person/nationality	/m/03_3d
/m/0bl5c	/award/award_winning_work/awards_won./award/award_honor/award_winner	/m/0h1_w
/m/0jxgx	/location/location/contains	/m/0lhql
/m/01cf93	/music/record_label/artist	/m/01sbf2
/m/019v9k	/education/educational_degree/people_with_this_degree./education/education/student	/m/05j12n
/m/01j851	/award/award_nominee/award_nominations./award/award_nomination/award	/m/0gkts9
/m/060c4	/organization/role/leaders./organization/leadership/organization	/m/07wkd
/m/07sbbz2	/music/genre/artists	/m/0gcs9
/m/05pcn59	/award/award_category/nominees./award/award_nomination/nominated_for	/m/02xs6_
/m/03cfjg	/award/award_nominee/award_nominations./award/award_nomination/award_nominee	/m/016sp_
/m/02q1tc5	/award/award_category/winners./award/award_honor/award_winner	/m/01rgcg
/m/09zmys	/people/person/gender	/m/02zsn
/m/0f6lx	/influence/influence_node/peers./influence/peer_relationship/peers	/m/0f0y8
/m/0f8pz	/people/person/spouse_s./people/marriage/location_of_ceremony	/m/09bkv
/m/0h3mrc	/award/award_winner/awards_won./award/award_honor/award_winner	/m/05xpms
/m/01mszz	/award/award_winning_work/awards_won./award/award_honor/award	/m/07bdd_
/m/017s11	/business/business_operation/industry	/m/02vxn
/m/01d6g	/sports/professional_sports_team/draft_picks./sports/sports_league_draft_pick/draft	/m/02r6gw6
/m/0jm_	/sports/sport/pro_athletes./sports/pro_sports_played/athlete	/m/0234pg
/m/099cng	/award/award_category/nominees./award/award_nomination/nominated_for	/m/0bs8s1p
/m/07z6xs	/film/film/genre	/m/060__y
/m/07c52	/media_common/netflix_genre/titles	/m/015ppk
/m/02pz3j5	/award/award_category/nominees./award/award_nomination/nominated_for	/m/0147w8
/m/011zf2	/award/award_winner/awards_won./award/award_honor/award_winner	/m/01l4zqz
/m/078mgh	/people/person/places_lived./people/place_lived/location	/m/013f1h
/m/031778	/film/film/other_crew./film/film_crew_gig/crewmember	/m/0bbxx9b
/m/02d42t	/people/person/profession	/m/02jknp
/m/01zc2w	/education/field_of_study/students_majoring./education/education/student	/m/01mqh5
/m/04shbh	/people/person/spouse_s./people/marriage/type_of_union	/m/01g63y
/m/0456xp	/base/popstra/celebrity/dated./base/popstra/dated/participant	/m/04shbh
/m/02x4sn8	/award/award_category/nominees./award/award_nomination/nominated_for	/m/02tjl3
/m/0407yfx	/film/film/release_date_s./film/film_regional_release_date/film_release_region	/m/05sb1
/m/01d5z	/baseball/baseball_team/team_stats./baseball/baseball_team_stats/season	/m/02h7s73
/m/0glj9q	/media_common/netflix_genre/titles	/m/0n6ds
/m/02lfl4	/award/award_winner/awards_won./award/award_honor/award_winner	/m/02lfcm
/m/06z4wj	/people/deceased_person/place_of_death	/m/02_286
/m/060c4	/government/government_office_category/officeholders./government/government_position_held/jurisdiction_of_office	/m/0j1z8
/m/0dvqq	/award/award_nominee/award_nominations./award/award_nomination/award	/m/01c4_6
/m/01w5m	/education/educational_institution/students_graduates./education/education/student	/m/07w21
/m/09889g	/people/person/profession	/m/01d_h8
/m/03cbtlj	/award/award_nominee/award_nominations./award/award_nomination/nominated_for	/m/01j67j
/m/060c4	/business/job_title/people_with_this_title./business/employment_tenure/company	/m/0gvbw
/m/03rz4	/base/popstra/location/vacationers./base/popstra/vacation_choice/vacationer	/m/0bksh
/m/07jjt	/olympics/olympic_sport/athletes./olympics/olympic_athlete_affiliation/olympics	/m/018qb4
/m/0gydcp7	/film/film/release_date_s./film/film_regional_release_date/film_release_region	/m/059j2
/m/035yn8	/film/film/featured_film_locations	/m/027kp3
/m/02qfhb	/music/artist/contribution./music/recording_contribution/performance_role	/m/026t6
/m/025_ql1	/people/person/place_of_birth	/m/01r32
/m/0fpgp26	/film/film/release_date_s./film/film_regional_release_date/film_release_region	/m/047lj
/m/035482	/people/cause_of_death/people	/m/02vmzp
/m/01kwld	/award/award_winner/awards_won./award/award_honor/award_winner	/m/015t7v
/m/05pcn59	/award/award_category/nominees./award/award_nomination/nominated_for	/m/01pj_5
/m/022fdt	/people/ethnicity/languages_spoken	/m/02hwyss
/m/03v6t	/education/educational_institution/students_graduates./education/education/major_field_of_study	/m/02j62
/m/0c4qzm	/award/award_nominee/award_nominations./award/award_nomination/award	/m/0gq_v
/m/0cmf0m0	/film/film/genre	/m/03k9fj
/m/04xm_	/people/person/nationality	/m/0345h
/m/06dkzt	/people/person/profession	/m/02jknp
/m/026t6	/music/performance_role/regular_performances./music/group_membership/group	/m/0l8g0
/m/0f6c3	/government/government_office_category/officeholders./government/government_position_held/jurisdiction_of_office	/m/02xry
/m/011zd3	/award/award_nominee/award_nominations./award/award_nomination/award_nominee	/m/05sdxx
/m/022yb4	/people/person/places_lived./people/place_lived/location	/m/0cr3d
/m/01pj_5	/film/film/genre	/m/0gf28
/m/011z3g	/award/award_nominee/award_nominations./award/award_nomination/award	/m/023vrq
/m/0181dw	/music/record_label/artist	/m/03f7m4h
/m/01yg9y	/award/award_winner/awards_won./award/award_honor/award_winner	/m/06jvj7
/m/0gq_v	/award/award_category/winners./award/award_honor/award_winner	/m/0cdf37
/m/0gkts9	/award/award_category/nominees./award/award_nomination/nominated_for	/m/015ppk
/m/09v3hq_	/organization/organization/headquarters./location/mailing_address/citytown	/m/02_286
/m/03558l	/sports/sports_position/players./sports/sports_team_roster/team	/m/0jm7n
/m/014488	/people/person/profession	/m/01d_h8
/m/04kjrv	/people/person/spouse_s./people/marriage/spouse	/m/01g23m
/m/02bqn1	/government/legislative_session/members./government/government_position_held/legislative_sessions	/m/02bqmq
/m/024tcq	/government/legislative_session/members./government/government_position_held/legislative_sessions	/m/06f0dc
/m/03cp7b3	/people/person/nationality	/m/03h64
/m/012dtf	/people/deceased_person/place_of_death	/m/02_286
/m/01438g	/film/actor/film./film/performance/film	/m/04sntd
/m/064t9	/music/genre/artists	/m/0249kn
/m/054g1r	/organization/organization/headquarters./location/mailing_address/citytown	/m/0r00l
/m/04y0yc	/award/award_nominee/award_nominations./award/award_nomination/award	/m/03r8v_
/m/03cffvv	/film/film/language	/m/0295r
/m/05148p4	/music/instrument/instrumentalists	/m/01kv4mb
/m/0sxdg	/organization/organization/child./organization/organization_relationship/child	/m/01t7jy
/m/01hmnh	/media_common/netflix_genre/titles	/m/0dqytn
/m/0mb8c	/film/film/country	/m/03h64
/m/0m2kd	/film/film/release_date_s./film/film_regional_release_date/film_release_region	/m/01mjq
/m/08b0cj	/sports/pro_athlete/teams./sports/sports_team_roster/team	/m/03h0k1
/m/03902	/travel/travel_destination/climate./travel/travel_destination_monthly_climate/month	/m/040fb
/m/02q5bx2	/film/film/genre	/m/01hmnh
/m/046qq	/film/actor/film./film/performance/film	/m/01shy7
/m/04cv9m	/film/film/genre	/m/04xvlr
/m/0gq_d	/award/award_category/winners./award/award_honor/award_winner	/m/0250f
/m/07wkd	/education/educational_institution/students_graduates./education/education/student	/m/012j8z
/m/01_d4	/base/popstra/location/vacationers./base/popstra/vacation_choice/vacationer	/m/033wx9
/m/01c6qp	/award/award_ceremony/awards_presented./award/award_honor/award_winner	/m/01l47f5
/m/0gd5z	/award/award_nominee/award_nominations./award/award_nomination/award	/m/01f7d
/m/0210f1	/people/person/gender	/m/02zsn
/m/07xzm	/music/performance_role/regular_performances./music/group_membership/role	/m/07gql
/m/07s6prs	/award/award_nominee/award_nominations./award/award_nomination/award_nominee	/m/022q4l9
/m/0bbxx9b	/award/award_nominee/award_nominations./award/award_nomination/nominated_for	/m/0hgnl3t
/m/016sp_	/award/award_nominee/award_nominations./award/award_nomination/award_nominee	/m/01k_r5b
/m/047t_	/location/statistical_region/places_exported_to./location/imports_and_exports/exported_to	/m/0k6nt
/m/0p9sw	/award/award_category/nominees./award/award_nomination/nominated_for	/m/0294zg
/m/05sq0m	/award/award_nominee/award_nominations./award/award_nomination/award_nominee	/m/03cfjg
/m/0lfyd	/location/location/adjoin_s./location/adjoining_relationship/adjoins	/m/01c744
/m/015t7v	/film/actor/film./film/performance/film	/m/0fzm0g
/m/054knh	/award/award_category/nominees./award/award_nomination/nominated_for	/m/072r5v
/m/08vd2q	/award/award_winning_work/awards_won./award/award_honor/award	/m/02w9sd7
/m/03qbnj	/award/award_category/winners./award/award_honor/ceremony	/m/01bx35
/m/07qcbw	/award/award_nominee/award_nominations./award/award_nomination/nominated_for	/m/015ppk
/m/034x61	/award/award_nominee/award_nominations./award/award_nomination/award_nominee	/m/06s6hs
/m/0clzr	/location/location/adjoin_s./location/adjoining_relationship/adjoins	/m/0jtf1
/m/03h_f4	/government/legislative_session/members./government/government_position_held/district_represented	/m/04s7y
/m/05qfh	/education/field_of_study/students_majoring./education/education/major_field_of_study	/m/02j62
/m/018wdw	/award/award_category/winners./award/award_honor/ceremony	/m/05qb8vx
/m/060bp	/government/government_office_category/officeholders./government/government_position_held/jurisdiction_of_office	/m/027nb
/m/0h5g_	/film/actor/film./film/performance/film	/m/02prwdh
/m/015fsv	/education/educational_institution/colors	/m/083jv
/m/0bwfn	/education/educational_institution/students_graduates./education/education/student	/m/044mrh
/m/04pcmw	/music/genre/artists	/m/019x62
/m/06wm0z	/award/award_nominee/award_nominations./award/award_nomination/award	/m/05pcn59
/m/0gq_v	/award/award_category/winners./award/award_honor/award_winner	/m/071jv5
/m/0bdt8	/film/actor/film./film/performance/film	/m/04vq33
/m/01gq0b	/people/person/gender	/m/02zsn
/m/0ftvz	/location/capital_of_administrative_division/capital_of./location/administrative_division_capital_relationship/administrative_division	/m/02xry
/m/0gz_	/user/alexander/philosophy/philosopher/interests	/m/04s0m
/m/034qmv	/film/film/country	/m/0345h
/m/0b_6lb	/base/marchmadness/ncaa_basketball_tournament/seeds./base/marchmadness/ncaa_tournament_seed/team	/m/026dqjm
/m/01c4_6	/award/award_category/winners./award/award_honor/ceremony	/m/05pd94v
/m/01fwf1	/film/actor/film./film/performance/film	/m/01_mdl
/m/01r3hr	/sports/sports_position/players./sports/sports_team_roster/team	/m/02663p2
/m/060c4	/organization/role/leaders./organization/leadership/organization	/m/02yxjs
/m/03bw6	/film/director/film	/m/0gxfz
/m/05pcn59	/award/award_category/nominees./award/award_nomination/nominated_for	/m/0ds2n
/m/05zjx	/people/person/profession	/m/01d_h8
/m/026bt_h	/sports/sports_team/roster./american_football/football_roster_position/position	/m/08ns5s
/m/0sw6g	/film/actor/film./film/performance/film	/m/02tjl3
/m/0k_kr	/music/record_label/artist	/m/0k7pf
/m/02d42t	/people/person/places_lived./people/place_lived/location	/m/09tlh
/m/07c6l	/music/performance_role/regular_performances./music/group_membership/role	/m/03t22m
/m/01vsn38	/award/award_nominee/award_nominations./award/award_nomination/award_nominee	/m/02mjf2
/m/05pcn59	/award/award_category/nominees./award/award_nomination/nominated_for	/m/09k56b7
/m/01gb54	/film/film_distributor/films_distributed./film/film_film_distributor_relationship/film	/m/0gy30w
/m/0qf43	/people/person/religion	/m/0kpl
/m/047vp1n	/film/film/genre	/m/0gsy3b
/m/088xp	/location/location/adjoin_s./location/adjoining_relationship/adjoins	/m/0j4b
/m/019v9k	/education/educational_degree/people_with_this_degree./education/education/institution	/m/02l1fn
/m/05bt6j	/music/genre/artists	/m/02k5sc
/m/0257yf	/award/award_category/winners./award/award_honor/ceremony	/m/01c6qp
/m/0cms7f	/award/award_nominee/award_nominations./award/award_nomination/award_nominee	/m/04zkj5
/m/051z6mv	/award/award_nominee/award_nominations./award/award_nomination/award_nominee	/m/05v1sb
/m/0bczgm	/award/award_nominee/award_nominations./award/award_nomination/award	/m/0cjyzs
/m/01jzyf	/film/film/production_companies	/m/0gfmc_
/m/06by7	/music/genre/artists	/m/01vswwx
/m/01934k	/people/person/spouse_s./people/marriage/spouse	/m/0b80__
/m/056878	/award/award_ceremony/awards_presented./award/award_honor/award_winner	/m/0khth
/m/0bx_hnp	/film/film/release_date_s./film/film_regional_release_date/film_release_distribution_medium	/m/07c52
/m/019m5j	/sports/sports_team/colors	/m/083jv
/m/045c66	/award/award_nominee/award_nominations./award/award_nomination/nominated_for	/m/045r_9
/m/026mfbr	/film/film/release_date_s./film/film_regional_release_date/film_release_distribution_medium	/m/029j_
/m/02vw1w2	/film/film/prequel	/m/0dd6bf
/m/0p9sw	/award/award_category/winners./award/award_honor/ceremony	/m/0fzrhn
/m/03rbzn	/olympics/olympic_sport/athletes./olympics/olympic_athlete_affiliation/country	/m/07fj_
/m/06tp4h	/music/artist/origin	/m/0n5d1
/m/031ns1	/education/educational_institution/students_graduates./education/education/student	/m/05m7zg
/m/0py9b	/business/business_operation/industry	/m/03ytc
/m/01_d4	/base/petbreeds/city_with_dogs/top_breeds./base/petbreeds/dog_city_relationship/dog_breed	/m/0km3f
/m/086nl7	/tv/tv_producer/programs_produced./tv/tv_producer_term/program	/m/06y_n
/m/040whs	/base/x2010fifaworldcupsouthafrica/world_cup_squad/current_world_cup_squad./base/x2010fifaworldcupsouthafrica/current_world_cup_squad/current_club	/m/05glrg
/m/01lxd4	/music/genre/artists	/m/0f0y8
/m/0428bc	/people/person/places_lived./people/place_lived/location	/m/02_286
/m/04xm_	/influence/influence_node/influenced_by	/m/015n8
/m/01hmnh	/media_common/netflix_genre/titles	/m/012s1d
/m/03zrc_	/base/x2010fifaworldcupsouthafrica/world_cup_squad/current_world_cup_squad./base/x2010fifaworldcupsouthafrica/current_world_cup_squad/current_club	/m/03mqj_
/m/096f8	/olympics/olympic_sport/athletes./olympics/olympic_athlete_affiliation/country	/m/03_3d
/m/02vx4	/sports/sport/pro_athletes./sports/pro_sports_played/athlete	/m/08jbxf
/m/01ky7c	/education/educational_institution/students_graduates./education/education/major_field_of_study	/m/02j62
/m/0br1w	/people/person/places_lived./people/place_lived/location	/m/0k_s5
/m/071dcs	/award/award_nominee/award_nominations./award/award_nomination/award	/m/0cc8l6d
/m/060c4	/business/job_title/people_with_this_title./business/employment_tenure/company	/m/031ns1
/m/0jmk7	/sports/professional_sports_team/draft_picks./sports/sports_league_draft_pick/school	/m/019dwp
/m/0603qp	/award/award_nominee/award_nominations./award/award_nomination/award	/m/03ccq3s
/m/04g4n	/award/award_nominee/award_nominations./award/award_nomination/award_nominee	/m/0fbx6
/m/05qfh	/education/field_of_study/students_majoring./education/education/major_field_of_study	/m/0fdys
/m/0fpv_3_	/film/film/release_date_s./film/film_regional_release_date/film_release_region	/m/09pmkv
/m/031b3h	/award/award_category/winners./award/award_honor/ceremony	/m/01bx35
/m/020h2v	/film/film_distributor/films_distributed./film/film_film_distributor_relationship/film	/m/024lt6
/m/0bdx29	/award/award_category/winners./award/award_honor/award_winner	/m/01_j71
/m/0837ql	/award/award_nominee/award_nominations./award/award_nomination/award	/m/01cky2
/m/01vrt_c	/award/award_nominee/award_nominations./award/award_nomination/award	/m/03qbnj
/m/02h3d1	/award/award_category/winners./award/award_honor/award_winner	/m/018gqj
/m/09qs08	/award/award_category/nominees./award/award_nomination/nominated_for	/m/016zfm
/m/014g9y	/people/person/profession	/m/02jknp
/m/0dq_5	/business/job_title/people_with_this_title./business/employment_tenure/company	/m/04sv4
/m/036dyy	/film/actor/film./film/performance/film	/m/04g73n
/m/03f6fl0	/music/artist/track_contributions./music/track_contribution/role	/m/05r5c
/m/03h64	/media_common/netflix_genre/titles	/m/0mb8c
/m/0dgskx	/award/award_winner/awards_won./award/award_honor/award_winner	/m/027ht3n
/m/057dxsg	/award/award_nominee/award_nominations./award/award_nomination/award_nominee	/m/05v1sb
/m/02vw1w2	/film/film/release_date_s./film/film_regional_release_date/film_release_distribution_medium	/m/029j_
/m/047csmy	/award/award_winning_work/awards_won./award/award_honor/award	/m/05b1610
/m/051m56	/award/award_winner/awards_won./award/award_honor/award_winner	/m/016srn
/m/044ptm	/people/person/profession	/m/018gz8
/m/02vx4	/sports/sport/pro_athletes./sports/pro_sports_played/athlete	/m/07h1h5
/m/02ppm4q	/award/award_category/nominees./award/award_nomination/nominated_for	/m/095zlp
/m/01vvyfh	/base/schemastaging/person_extra/net_worth./measurement_unit/dated_money_value/currency	/m/01nv4h
/m/0pqzh	/tv/tv_writer/tv_programs./tv/tv_program_writer_relationship/tv_program	/m/0d_rw
/m/0bdw6t	/award/award_category/winners./award/award_honor/award_winner	/m/03gm48
/m/0456xp	/film/actor/film./film/performance/film	/m/03qcfvw
/m/01jmv8	/film/actor/film./film/performance/film	/m/01vfqh
/m/026z9	/music/genre/artists	/m/01lqf49
/m/02hsq3m	/award/award_category/nominees./award/award_nomination/nominated_for	/m/0ds2n
/m/06h2w	/award/award_nominee/award_nominations./award/award_nomination/award	/m/025m98
/m/06kl78	/film/film/genre	/m/01jfsb
/m/03c5bz	/people/person/profession	/m/0d1pc
/m/0cp08zg	/film/film/release_date_s./film/film_regional_release_date/film_release_region	/m/06mzp
/m/0d02km	/people/person/place_of_birth	/m/068p2
/m/05g76	/sports/professional_sports_team/draft_picks./sports/sports_league_draft_pick/school	/m/06fq2
/m/0g57wgv	/film/film/release_date_s./film/film_regional_release_date/film_release_region	/m/0j1z8
/m/0260bz	/film/film/genre	/m/04xvlr
/m/01kv4mb	/people/person/places_lived./people/place_lived/location	/m/0z53k
/m/07k51gd	/award/award_winner/awards_won./award/award_honor/award_winner	/m/080knyg
/m/04wqr	/people/person/profession	/m/0d1pc
/m/0fdys	/education/field_of_study/students_majoring./education/education/student	/m/03ftmg
/m/02wh75	/award/award_category/winners./award/award_honor/ceremony	/m/05pd94v
/m/05krk	/education/educational_institution/students_graduates./education/education/student	/m/03hpr
/m/01s5q	/film/film_subject/films	/m/01m13b
/m/01pctb	/people/person/spouse_s./people/marriage/spouse	/m/01vsykc
/m/02661h	/people/person/profession	/m/01d_h8
/m/01gtbb	/government/legislative_session/members./government/government_position_held/legislative_sessions	/m/01gsvb
/m/038723	/people/ethnicity/people	/m/02pv_d
/m/07g0_	/base/biblioness/bibs_location/country	/m/059j2
/m/047msdk	/film/film/release_date_s./film/film_regional_release_date/film_release_region	/m/059j2
/m/07xzm	/music/instrument/instrumentalists	/m/032nl2
/m/0glnm	/film/film/release_date_s./film/film_regional_release_date/film_release_distribution_medium	/m/029j_
/m/02mqc4	/award/award_nominee/award_nominations./award/award_nomination/award	/m/0bsjcw
/m/0bz5v2	/tv/tv_personality/tv_regular_appearances./tv/tv_regular_personal_appearance/program	/m/01j7mr
/m/07r_dg	/award/award_nominee/award_nominations./award/award_nomination/award	/m/02ppm4q
/m/041p3y	/music/record_label/artist	/m/0249kn
/m/0170pk	/award/award_nominee/award_nominations./award/award_nomination/award	/m/0279c15
/m/05c1t6z	/award/award_ceremony/awards_presented./award/award_honor/award_winner	/m/05gnf
/m/02fj8n	/film/film/production_companies	/m/0c_j5d
/m/04pqqb	/organization/organization_founder/organizations_founded	/m/0c41qv
/m/016kjs	/base/popstra/celebrity/friendship./base/popstra/friendship/participant	/m/013w7j
/m/05pd94v	/award/award_ceremony/awards_presented./award/award_honor/award_winner	/m/0478__m
/m/01x6v6	/award/award_nominee/award_nominations./award/award_nomination/award	/m/025mbn
/m/0rqyx	/location/location/adjoin_s./location/adjoining_relationship/adjoins	/m/0n1rj
/m/04ns3gy	/people/person/places_lived./people/place_lived/location	/m/0cc56
/m/04w4s	/location/location/adjoin_s./location/adjoining_relationship/adjoins	/m/07t21
/m/060c4	/organization/role/leaders./organization/leadership/organization	/m/01z3bz
/m/0bkq7	/film/film/featured_film_locations	/m/02_286
/m/0c4y8	/people/deceased_person/place_of_death	/m/02_286
/m/05sb1	/location/location/adjoin_s./location/adjoining_relationship/adjoins	/m/0jdd
/m/014x77	/people/person/spouse_s./people/marriage/location_of_ceremony	/m/02_286
/m/02yv6b	/music/genre/artists	/m/0cfgd
/m/09hnb	/music/artist/contribution./music/recording_contribution/performance_role	/m/05r5c
/m/02lnbg	/music/genre/artists	/m/03bxwtd
/m/01g23m	/base/popstra/celebrity/canoodled./base/popstra/canoodled/participant	/m/01f492
/m/0190vc	/music/record_label/artist	/m/02qsjt
/m/047csmy	/film/film/featured_film_locations	/m/0dclg
/m/078mgh	/people/person/place_of_birth	/m/013f1h
/m/0ch26b_	/film/film/release_date_s./film/film_regional_release_date/film_release_region	/m/0k6nt
/m/02w9sd7	/award/award_category/winners./award/award_honor/award_winner	/m/0c6qh
/m/05xvj	/baseball/baseball_team/team_stats./baseball/baseball_team_stats/season	/m/02h7s73
/m/0gt1k	/film/film/executive_produced_by	/m/0l9k1
/m/0p_sc	/film/film/music	/m/019x62
/m/01qnfc	/people/person/profession	/m/02jknp
/m/04kjrv	/award/award_nominee/award_nominations./award/award_nomination/award	/m/02wh75
/m/05sq0m	/people/person/gender	/m/02zsn
/m/03c_cxn	/film/film/release_date_s./film/film_regional_release_date/film_release_distribution_medium	/m/029j_
/m/0k1wz	/people/deceased_person/place_of_death	/m/06pr6
/m/0c_gcr	/award/award_nominee/award_nominations./award/award_nomination/award	/m/02x73k6
/m/0fx0j2	/people/person/gender	/m/02zsn
/m/01k_r5b	/award/award_winner/awards_won./award/award_honor/award_winner	/m/051m56
/m/06y611	/film/film/genre	/m/03k9fj
/m/0gj9tn5	/film/film/production_companies	/m/02j_j0
/m/0mzkr	/music/record_label/artist	/m/04xrx
/m/047rkcm	/film/film/production_companies	/m/059x3p
/m/05sq20	/award/award_winner/awards_won./award/award_honor/award_winner	/m/01l47f5
/m/0794g	/award/award_nominee/award_nominations./award/award_nomination/award_nominee	/m/01vw37m
/m/06fmdb	/award/award_nominee/award_nominations./award/award_nomination/award	/m/02h3d1
/m/0qf43	/award/award_nominee/award_nominations./award/award_nomination/award	/m/02n9nmz
/m/02wr6r	/film/actor/film./film/performance/film	/m/01f39b
/m/015ynm	/film/film/genre	/m/01hmnh
/m/01mqz0	/base/popstra/celebrity/friendship./base/popstra/friendship/participant	/m/02kz_
/m/0fy59t	/award/award_ceremony/awards_presented./award/award_honor/honored_for	/m/0gxfz
/m/01jrp0	/people/person/gender	/m/02zsn
/m/071vr	/travel/travel_destination/climate./travel/travel_destination_monthly_climate/month	/m/040fb
/m/01xv77	/people/person/profession	/m/01d_h8
/m/043q4d	/tv/non_character_role/tv_regular_personal_appearances./tv/tv_regular_personal_appearance/person	/m/0mbw0
/m/09hnb	/award/award_nominee/award_nominations./award/award_nomination/award_nominee	/m/01vvlyt
/m/03k9fj	/media_common/netflix_genre/titles	/m/03tn80
/m/064xm0	/people/profession/specialization_of	/m/02jknp
/m/05b4l5x	/award/award_category/nominees./award/award_nomination/nominated_for	/m/0cn_b8
/m/06tp4h	/base/popstra/celebrity/friendship./base/popstra/friendship/participant	/m/06wm0z
/m/06by7	/music/genre/artists	/m/0478__m
/m/03h0byn	/film/film/release_date_s./film/film_regional_release_date/film_release_region	/m/0d060g
/m/018qb4	/user/jg/default_domain/olympic_games/sports	/m/02vx4
/m/027s4dn	/award/award_category/winners./award/award_honor/ceremony	/m/026kqs9
/m/03wy8t	/film/film/featured_film_locations	/m/02_286
/m/0pmhf	/award/award_winner/awards_won./award/award_honor/award_winner	/m/02xs5v
/m/02vqsll	/film/film/release_date_s./film/film_regional_release_date/film_release_distribution_medium	/m/029j_
/m/0g4vmj8	/award/award_winning_work/awards_won./award/award_honor/award	/m/02x73k6
/m/03cffvv	/film/film/release_date_s./film/film_regional_release_date/film_release_distribution_medium	/m/029j_
/m/0dc95	/sports/sports_team_location/teams	/m/05l71
/m/024rdh	/award/award_nominee/award_nominations./award/award_nomination/nominated_for	/m/0gpx6
/m/02x2jl_	/film/film/genre	/m/01jfsb
/m/044mrh	/film/actor/film./film/performance/film	/m/04sntd
/m/05tbn	/location/location/contains	/m/0mwkp
/m/09qr6	/award/award_nominee/award_nominations./award/award_nomination/award	/m/01cky2
/m/04v048	/people/person/places_lived./people/place_lived/location	/m/0cr3d
/m/026670	/award/award_nominee/award_nominations./award/award_nomination/award	/m/02n9nmz
/m/01vw37m	/award/award_nominee/award_nominations./award/award_nomination/award	/m/02f79n
/m/078vc	/people/ethnicity/languages_spoken	/m/03k50
/m/06w7v	/music/performance_role/track_performances./music/track_contribution/role	/m/0214km
/m/032_jg	/award/award_nominee/award_nominations./award/award_nomination/award_nominee	/m/0c6qh
/m/0gltv	/film/film/release_date_s./film/film_regional_release_date/film_release_distribution_medium	/m/029j_
/m/0f3m1	/film/film/film_art_direction_by	/m/05b2f_k
/m/01tl50z	/award/award_nominee/award_nominations./award/award_nomination/award	/m/0gkts9
/m/02__ww	/film/actor/film./film/performance/film	/m/0ds33
/m/06cqb	/music/genre/artists	/m/01sbf2
/m/05tg3	/sports/professional_sports_team/draft_picks./sports/sports_league_draft_pick/school	/m/0lyjf
/m/026w_gk	/award/award_nominee/award_nominations./award/award_nomination/award_nominee	/m/0pz7h
/m/024rdh	/film/film_distributor/films_distributed./film/film_film_distributor_relationship/film	/m/0gpx6
/m/04wp63	/award/award_winner/awards_won./award/award_honor/award_winner	/m/021yc7p
/m/015q1n	/education/educational_institution/students_graduates./education/education/student	/m/01nvmd_
/m/030tj5	/people/person/profession	/m/02jknp
/m/060c4	/government/government_office_category/officeholders./government/government_position_held/jurisdiction_of_office	/m/03ryn
/m/0bbxx9b	/award/award_nominee/award_nominations./award/award_nomination/award	/m/018wdw
/m/03tn80	/film/film/genre	/m/02kdv5l
/m/026r8q	/base/popstra/celebrity/dated./base/popstra/dated/participant	/m/0bksh
/m/0c_gcr	/award/award_nominee/award_nominations./award/award_nomination/nominated_for	/m/0ds6bmk
/m/0pz7h	/award/award_nominee/award_nominations./award/award_nomination/award_nominee	/m/026w_gk
/m/05gnf	/award/award_nominee/award_nominations./award/award_nomination/nominated_for	/m/02czd5
/m/05q4y12	/film/film/release_date_s./film/film_regional_release_date/film_release_region	/m/03h64
/m/0gt1k	/film/film/produced_by	/m/0l9k1
/m/03x7hd	/award/award_winning_work/awards_won./award/award_honor/award_winner	/m/04gcd1
/m/02v992	/education/educational_institution/students_graduates./education/education/student	/m/0cqcgj
/m/0bx0l	/film/film/release_date_s./film/film_regional_release_date/film_release_region	/m/059j2
/m/026dg51	/award/award_nominee/award_nominations./award/award_nomination/nominated_for	/m/0gj50
/m/03dn9v	/film/actor/film./film/performance/film	/m/047csmy
/m/01vw37m	/film/actor/film./film/performance/film	/m/024lff
/m/03bkbh	/people/ethnicity/people	/m/01tzm9
/m/03j24kf	/influence/influence_node/peers./influence/peer_relationship/peers	/m/09889g
/m/05sq0m	/award/award_nominee/award_nominations./award/award_nomination/award_nominee	/m/01lmj3q
/m/0d6484	/award/award_nominee/award_nominations./award/award_nomination/nominated_for	/m/0gm2_0
/m/077yk0	/people/person/gender	/m/02zsn
/m/01l47f5	/award/award_winner/awards_won./award/award_honor/award_winner	/m/051m56
/m/0794g	/base/popstra/celebrity/friendship./base/popstra/friendship/participant	/m/0hwqz
/m/080knyg	/award/award_winner/awards_won./award/award_honor/award_winner	/m/07m77x
/m/01k7b0	/film/film/release_date_s./film/film_regional_release_date/film_release_distribution_medium	/m/029j_
/m/0b_6lb	/time/event/locations	/m/029cr
/m/04ljl_l	/award/award_category/nominees./award/award_nomination/nominated_for	/m/08lr6s
/m/035yn8	/film/film/language	/m/0349s
/m/0794g	/award/award_nominee/award_nominations./award/award_nomination/award_nominee	/m/01_xtx
/m/02_2v2	/award/award_nominee/award_nominations./award/award_nomination/award_nominee	/m/03cl8lb
/m/018qb4	/olympics/olympic_games/sports	/m/02vx4
/m/0f6c3	/government/government_office_category/officeholders./government/government_position_held/jurisdiction_of_office	/m/0vbk
/m/012wg	/award/award_nominee/award_nominations./award/award_nomination/award	/m/02h3d1
/m/03yf5g	/sports/pro_athlete/teams./sports/sports_team_roster/team	/m/0d3fdn
/m/0pmhf	/award/award_nominee/award_nominations./award/award_nomination/nominated_for	/m/02jxbw
/m/02jtjz	/award/award_nominee/award_nominations./award/award_nomination/award_nominee	/m/069ld1
/m/06myp	/people/person/employment_history./business/employment_tenure/company	/m/0dy04
/m/0c0zq	/film/film/produced_by	/m/058frd
/m/02_286	/travel/travel_destination/how_to_get_here./travel/transportation/mode_of_transportation	/m/025t3bg
/m/078vc	/people/ethnicity/languages_spoken	/m/0c_v2
/m/0bdw1g	/award/award_category/nominees./award/award_nomination/nominated_for	/m/0pc_l
/m/02ndf1	/people/person/place_of_birth	/m/0dclg
/m/02vklm3	/sports/sports_team/roster./american_football/football_roster_position/position	/m/01r3hr
/m/02ddq4	/award/award_category/winners./award/award_honor/award_winner	/m/0gcs9
/m/026gvfj	/education/educational_institution/students_graduates./education/education/student	/m/09zmys
/m/02t_99	/people/person/profession	/m/0d1pc
/m/05ty4m	/award/award_nominee/award_nominations./award/award_nomination/nominated_for	/m/0124k9
/m/03pvt	/award/award_nominee/award_nominations./award/award_nomination/award	/m/04ljl_l
/m/0237jb	/award/award_nominee/award_nominations./award/award_nomination/award	/m/05b1610
/m/01vrt_c	/award/award_winner/awards_won./award/award_honor/award_winner	/m/09hnb
/m/0b68vs	/award/award_nominee/award_nominations./award/award_nomination/award	/m/01c427
/m/04hs7d	/tv/tv_program/genre	/m/02kdv5l
/m/01wgxtl	/people/person/places_lived./people/place_lived/location	/m/0cr3d
/m/02wh0	/influence/influence_node/influenced_by	/m/032l1
/m/02bkg	/olympics/olympic_sport/athletes./olympics/olympic_athlete_affiliation/country	/m/0d060g
/m/01shy7	/film/film/release_date_s./film/film_regional_release_date/film_release_region	/m/01mjq
/m/0721cy	/award/award_nominee/award_nominations./award/award_nomination/award_nominee	/m/0988cp
/m/06lhbl	/people/person/profession	/m/0dgd_
/m/0kb57	/film/film/featured_film_locations	/m/02_286
/m/05xf75	/people/person/spouse_s./people/marriage/type_of_union	/m/01g63y
/m/017s11	/film/film_distributor/films_distributed./film/film_film_distributor_relationship/film	/m/02rrfzf
/m/02lnbg	/music/genre/artists	/m/01323p
/m/05148p4	/music/instrument/instrumentalists	/m/017g21
/m/026t6	/music/performance_role/track_performances./music/track_contribution/role	/m/03t22m
/m/05xf75	/film/actor/film./film/performance/film	/m/0qm8b
/m/060c4	/organization/role/leaders./organization/leadership/organization	/m/06fq2
/m/053j4w4	/award/award_nominee/award_nominations./award/award_nomination/award	/m/0gq_v
/m/045c66	/film/actor/film./film/performance/film	/m/045r_9
/m/01sp81	/award/award_winner/awards_won./award/award_honor/award_winner	/m/051wwp
/m/0n6ds	/award/award_winning_work/awards_won./award/award_honor/award	/m/05pcn59
/m/01wmjkb	/award/award_nominee/award_nominations./award/award_nomination/award	/m/02wh75
/m/01z7s_	/people/person/spouse_s./people/marriage/spouse	/m/05szp
/m/04pnx	/location/location/contains	/m/02k8k
/m/0mb8c	/film/film/genre	/m/02kdv5l
/m/02wmbg	/people/person/profession	/m/01d_h8
/m/0f830f	/award/award_nominee/award_nominations./award/award_nomination/award_nominee	/m/02tr7d
/m/03j24kf	/award/award_nominee/award_nominations./award/award_nomination/award	/m/03tk6z
/m/09889g	/people/person/spouse_s./people/marriage/location_of_ceremony	/m/027rn
/m/060c4	/organization/role/leaders./organization/leadership/organization	/m/01gwck
/m/09v51c2	/award/award_category/winners./award/award_honor/award_winner	/m/01t2h2
/m/0cb77r	/award/award_winner/awards_won./award/award_honor/award_winner	/m/051z6mv
/m/07s846j	/film/film/release_date_s./film/film_regional_release_date/film_release_region	/m/0k6nt
/m/0cpllql	/film/film/genre	/m/03k9fj
/m/0ksrf8	/film/actor/film./film/performance/film	/m/02vqsll
/m/06by7	/music/genre/artists	/m/0gdh5
/m/01cky2	/award/award_category/winners./award/award_honor/ceremony	/m/05pd94v
/m/0272_vz	/award/award_winning_work/awards_won./award/award_honor/award	/m/04ljl_l
/m/0cb77r	/award/award_nominee/award_nominations./award/award_nomination/award_nominee	/m/0fqjks
/m/015d3h	/award/award_nominee/award_nominations./award/award_nomination/award	/m/0bdw6t
/m/02wrrm	/award/award_nominee/award_nominations./award/award_nomination/award	/m/04ljl_l
/m/018wdw	/award/award_category/nominees./award/award_nomination/nominated_for	/m/0ds33
/m/05r5c	/music/instrument/instrumentalists	/m/03bnv
/m/0640y35	/film/film/production_companies	/m/0c41qv
/m/01kf4tt	/film/film/genre	/m/01jfsb
/m/025m98	/award/award_category/winners./award/award_honor/award_winner	/m/06h2w
/m/08hmch	/film/film/release_date_s./film/film_regional_release_date/film_release_region	/m/047lj
/m/0grd7	/location/location/time_zones	/m/03bdv
/m/02zd460	/education/university/fraternities_and_sororities	/m/035tlh
/m/03f0r5w	/people/person/profession	/m/01d_h8
/m/04xrx	/base/popstra/celebrity/friendship./base/popstra/friendship/participant	/m/02yygk
/m/0448r	/people/person/languages	/m/04h9h
/m/09_94	/olympics/olympic_sport/athletes./olympics/olympic_athlete_affiliation/country	/m/01mjq
/m/026kmvf	/soccer/football_player/current_team./sports/sports_team_roster/team	/m/03v9yw
/m/0grwj	/people/person/spouse_s./people/marriage/type_of_union	/m/01g63y
/m/03qbnj	/award/award_category/winners./award/award_honor/award_winner	/m/0ggl02
/m/04xvlr	/media_common/netflix_genre/titles	/m/01msrb
/m/02kxbx3	/award/award_nominee/award_nominations./award/award_nomination/nominated_for	/m/01jzyf
/m/0345h	/location/location/contains	/m/0pz6q
/m/05l71	/sports/sports_team/sport	/m/0jm_
/m/0cmc26r	/film/film/release_date_s./film/film_regional_release_date/film_release_region	/m/0345h
/m/01d259	/film/film/release_date_s./film/film_regional_release_date/film_release_region	/m/0k6nt
/m/02vz6dn	/film/film/release_date_s./film/film_regional_release_date/film_release_region	/m/01mjq
/m/05gnf	/tv/tv_network/programs./tv/tv_network_duration/program	/m/02_1q9
/m/078mm1	/film/film/language	/m/06mp7
/m/07_53	/olympics/olympic_sport/athletes./olympics/olympic_athlete_affiliation/country	/m/01mjq
/m/07m77x	/film/actor/film./film/performance/film	/m/06fpsx
/m/016ztl	/film/film/dubbing_performances./film/dubbing_performance/actor	/m/0582cf
/m/03jjzf	/award/award_nominee/award_nominations./award/award_nomination/award	/m/05zrvfd
[truncated: 9,714 more rows]
