# Supplementary material
Source: ML conference proceedings conference paper supplement (https://proceedings.neurips.cc/paper_files/paper/2021/hash/0fd600c953cde8121262e322ef09f70e-Abstract.html)
Supplement: Supplementary file 1 [file 0fd600c953cde8121262e322ef09f70e-Supplemental.zip › Supplementary_Material_Paper_8745/data/GraIL-BM_fb237_v4/test/test-random-sample/test3.txt]

/m/03zz8b	/award/award_nominee/award_nominations./award/award_nomination/award	/m/05zrvfd	1
/m/05gml8	/location/statistical_region/religions./location/religion_percentage/religion	/m/0fvyg	0
/m/01zc2w	/education/field_of_study/students_majoring./education/education/major_field_of_study	/m/0jjw	1
/m/02w70	/base/schemastaging/person_extra/net_worth./measurement_unit/dated_money_value/currency	/m/0g_bh	0
/m/077yk0	/award/award_nominee/award_nominations./award/award_nomination/award_nominee	/m/022q4l9	1
/m/0k0q73t	/ice_hockey/hockey_team/current_roster./sports/sports_team_roster/position	/m/01s9vc	0
/m/095z4q	/film/film/production_companies	/m/06rq1k	1
/m/03bdm4	/base/biblioness/bibs_location/country	/m/03xb2w	0
/m/05pd94v	/award/award_ceremony/awards_presented./award/award_honor/award_winner	/m/03qmj9	1
/m/02px_23	/base/popstra/celebrity/dated./base/popstra/dated/participant	/m/0fcrg	0
/m/0353tm	/film/film/release_date_s./film/film_regional_release_date/film_release_distribution_medium	/m/029j_	1
/m/045r_9	/people/person/gender	/m/0621cs	0
/m/01jzyf	/award/award_winning_work/awards_won./award/award_honor/award_winner	/m/01fh9	1
/m/07fj_	/base/petbreeds/city_with_dogs/top_breeds./base/petbreeds/dog_city_relationship/dog_breed	/m/01f9zw	0
/m/01mkq	/education/field_of_study/students_majoring./education/education/major_field_of_study	/m/05qfh	1
/m/0h7t36	/film/film/release_date_s./film/film_regional_release_date/film_release_region	/m/014vk4	0
/m/0dd6bf	/film/film/genre	/m/01hmnh	1
/m/0ch26b_	/film/film/featured_film_locations	/m/01gy7r	0
/m/0ds11z	/award/award_winning_work/awards_won./award/award_honor/award	/m/0gq_v	1
/m/026n998	/music/group_member/membership./music/group_membership/role	/m/016k6x	0
/m/01yhm	/baseball/baseball_team/team_stats./baseball/baseball_team_stats/season	/m/04110b0	1
/m/027kp3	/film/film/estimated_budget./measurement_unit/dated_money_value/currency	/m/012dtf	0
/m/026z9	/music/genre/artists	/m/09889g	1
/m/0j1z8	/film/film/release_date_s./film/film_regional_release_date/film_regional_debut_venue	/m/01c65z	0
/m/01qgry	/music/artist/track_contributions./music/track_contribution/role	/m/07c6l	1
/m/033hqf	/base/locations/continents/countries_within	/m/013_vh	0
/m/0243cq	/film/film/release_date_s./film/film_regional_release_date/film_release_distribution_medium	/m/029j_	1
/m/05j0wc	/people/marriage_union_type/unions_of_this_type./people/marriage/location_of_ceremony	/m/02hsq3m	0
/m/020h2v	/business/business_operation/industry	/m/02vxn	1
/m/016m5c	/award/award_category/winners./award/award_honor/ceremony	/m/098n_m	0
/m/01cwcr	/film/actor/film./film/performance/film	/m/02qcr	1
/m/03f5vvx	/celebrities/celebrity/sexual_relationships./celebrities/romantic_relationship/celebrity	/m/0gy30w	0
/m/01mv_n	/people/person/profession	/m/018gz8	1
/m/01s753	/organization/endowed_organization/endowment./measurement_unit/dated_money_value/currency	/m/0164v	0
/m/027m67	/film/film/language	/m/07c9s	1
/m/069ld1	/education/university/fraternities_and_sororities	/m/04kl74p	0
/m/09y20	/award/award_nominee/award_nominations./award/award_nomination/award_nominee	/m/0dvld	1
/m/0bx0lc	/award/award_winning_work/awards_won./award/award_honor/award	/m/069ld1	0
/m/0f4dx2	/award/award_winner/awards_won./award/award_honor/award_winner	/m/03n_7k	1
/m/02zccd	/base/schemastaging/organization_extra/phone_number./base/schemastaging/phone_sandbox/contact_category	/m/01g23m	0
/m/01pv91	/award/award_winning_work/awards_won./award/award_honor/award	/m/02x1z2s	1
/m/04gr35	/film/film/film_production_design_by	/m/01r6jt2	0
/m/060bp	/government/government_office_category/officeholders./government/government_position_held/jurisdiction_of_office	/m/0164v	1
/m/01ws9n6	/sports/professional_sports_team/draft_picks./sports/sports_league_draft_pick/school	/m/032j_n	0
/m/0n6kf	/influence/influence_node/influenced_by	/m/084w8	1
/m/0l339	/film/film/story_by	/m/014pg1	0
/m/016ywr	/film/actor/film./film/performance/film	/m/0bbm7r	1
/m/07h76	/sports/sports_team/roster./baseball/baseball_roster_position/position	/m/0173s9	0
/m/04mkft	/organization/organization/place_founded	/m/0r00l	1
/m/01g0jn	/location/location/contains	/m/0g5qmbz	0
/m/06rqw	/music/genre/artists	/m/0frsw	1
/m/01gq0b	/award/award_winner/awards_won./award/award_honor/award_winner	/m/01xn6mc	0
/m/0dln8jk	/film/film/genre	/m/011ys5	1
/m/04f6df0	/sports/sports_team/roster./baseball/baseball_roster_position/position	/m/01gy7r	0
/m/051wwp	/people/person/place_of_birth	/m/01_d4	1
/m/02xb2bt	/base/popstra/celebrity/dated./base/popstra/dated/participant	/m/04f6df0	0
/m/02bg55	/film/film/release_date_s./film/film_regional_release_date/film_release_region	/m/059j2	1
/m/05t54s	/medicine/disease/risk_factors	/m/069ld1	0
/m/0d810y	/award/award_winner/awards_won./award/award_honor/award_winner	/m/044lyq	1
/m/0c4f4	/film/director/film	/m/02rlj20	0
/m/0pd57	/film/film/genre	/m/01drsx	1
/m/0qm8b	/time/event/instance_of_recurring_event	/m/0621cs	0
/m/05bt6j	/music/genre/artists	/m/01q99h	1
/m/0d02km	/sports/sports_league_draft/picks./sports/sports_league_draft_pick/school	/m/08xvpn	0
/m/01x2tm8	/people/person/profession	/m/01d_h8	1
/m/02n9nmz	/base/popstra/celebrity/canoodled./base/popstra/canoodled/participant	/m/04vjh	0
/m/0cx6f	/music/genre/artists	/m/0f6lx	1
/m/03rl1g	/film/film/prequel	/m/0cxn2	0
/m/0cqgl9	/award/award_category/winners./award/award_honor/ceremony	/m/092c5f	1
/m/01lqnff	/people/person/sibling_s./people/sibling_relationship/sibling	/m/0b80__	0
/m/025p38	/film/actor/film./film/performance/film	/m/0f42nz	1
/m/0dc95	/film/film_distributor/films_distributed./film/film_film_distributor_relationship/film	/m/01t_wfl	0
/m/07gbf	/tv/tv_program/regular_cast./tv/regular_tv_appearance/actor	/m/01dbgw	1
/m/04328m	/sports/sports_team_location/teams	/m/0n1v8	0
/m/09j028	/sports/pro_athlete/teams./sports/sports_team_roster/team	/m/0xbm	1
/m/07h9gp	/education/educational_degree/people_with_this_degree./education/education/institution	/m/01nxzv	0
/m/01_d4	/travel/travel_destination/climate./travel/travel_destination_monthly_climate/month	/m/04w_7	1
/m/01wyy_	/music/artist/track_contributions./music/track_contribution/role	/m/012vd6	0
/m/0dq_5	/organization/role/leaders./organization/leadership/organization	/m/03mnk	1
/m/05gml8	/base/popstra/location/vacationers./base/popstra/vacation_choice/vacationer	/m/05g56	0
/m/05148p4	/music/performance_role/regular_performances./music/group_membership/group	/m/0163m1	1
/m/0366c	/location/us_county/county_seat	/m/06xkst	0
/m/0194d	/olympics/olympic_sport/athletes./olympics/olympic_athlete_affiliation/country	/m/06nnj	1
/m/04_tv	/base/popstra/celebrity/friendship./base/popstra/friendship/participant	/m/01gq0b	0
/m/06rny	/american_football/football_team/current_roster./sports/sports_team_roster/position	/m/01r3hr	1
/m/058cm	/people/person/languages	/m/01_xtx	0
/m/064t9	/music/genre/artists	/m/016vn3	1
/m/06d4h	/sports/sports_team_location/teams	/m/02zccd	0
/m/03t22m	/music/performance_role/regular_performances./music/group_membership/role	/m/05r5c	1
/m/06rny	/sports/sports_team_location/teams	/m/0fy59t	0
/m/02sp_v	/award/award_category/winners./award/award_honor/award_winner	/m/07h76	1
/m/06rny	/award/award_category/winners./award/award_honor/award_winner	/m/013q0p	0
/m/03902	/travel/travel_destination/climate./travel/travel_destination_monthly_climate/month	/m/0ll3	1
/m/01z3bz	/people/person/places_lived./people/place_lived/location	/m/02j490	0
/m/01tx9m	/organization/organization/headquarters./location/mailing_address/state_province_region	/m/07b_l	1
/m/013crh	/location/location/time_zones	/m/04zjxcz	0
/m/0c0nhgv	/film/film/release_date_s./film/film_regional_release_date/film_release_region	/m/03h64	1
/m/01v27pl	/award/award_winning_work/awards_won./award/award_honor/award_winner	/m/08jbxf	0
/m/01zc2w	/education/field_of_study/students_majoring./education/education/student	/m/05gml8	1
/m/04999m	/organization/organization/child./organization/organization_relationship/child	/m/01fsv9	0
/m/0lwyk	/education/educational_institution/students_graduates./education/education/major_field_of_study	/m/05qfh	1
/m/04pqqb	/time/event/locations	/m/01s753	0
/m/0b1hw	/award/award_nominee/award_nominations./award/award_nomination/award	/m/02x4wb	1
/m/08z39v	/tv/tv_network/programs./tv/tv_network_duration/program	/m/02px_23	0
/m/07g1sm	/film/film/genre	/m/060__y	1
/m/040rmy	/celebrities/celebrity/celebrity_friends./celebrities/friendship/friend	/m/0b9rdk	0
/m/0bkq7	/film/film/film_art_direction_by	/m/05v1sb	1
/m/01gqfm	/tv/tv_producer/programs_produced./tv/tv_producer_term/program	/m/01445t	0
/m/07147	/sports/professional_sports_team/draft_picks./sports/sports_league_draft_pick/school	/m/02zd460	1
/m/01r6jt2	/film/film/music	/m/06rny	0
/m/06by7	/music/genre/artists	/m/0zjpz	1
/m/01gy7r	/influence/influence_node/peers./influence/peer_relationship/peers	/m/0n1rj	0
/m/016732	/award/award_nominee/award_nominations./award/award_nomination/award_nominee	/m/03bxwtd	1
/m/05wh0sh	/ice_hockey/hockey_team/current_roster./sports/sports_team_roster/position	/m/0234j5	0
/m/02qt02v	/award/award_category/winners./award/award_honor/award_winner	/m/0l15n	1
/m/035zr0	/military/military_combatant/military_conflicts./military/military_combatant_group/combatants	/m/01jmv8	0
/m/05b_gq	/film/film/release_date_s./film/film_regional_release_date/film_release_distribution_medium	/m/029j_	1
/m/027cyf7	/tv/tv_network/programs./tv/tv_network_duration/program	/m/040rmy	0
/m/01hmnh	/media_common/netflix_genre/titles	/m/02vqhv0	1
/m/05ff6	/sports/sports_position/players./sports/sports_team_roster/team	/m/07fj_	0
/m/03qbnj	/award/award_category/winners./award/award_honor/award_winner	/m/0k7pf	1
/m/035v3	/education/university/international_tuition./measurement_unit/dated_money_value/currency	/m/0542n	0
/m/05dss7	/film/film/release_date_s./film/film_regional_release_date/film_release_region	/m/0k6nt	1
/m/01c0cc	/education/field_of_study/students_majoring./education/education/major_field_of_study	/m/026kqs9	0
/m/0l6px	/award/award_nominee/award_nominations./award/award_nomination/award	/m/0cqh6z	1
/m/05x8n	/organization/organization_founder/organizations_founded	/m/02773nt	0
/m/0fbtbt	/award/award_category/winners./award/award_honor/award_winner	/m/04gnbv1	1
/m/02zs4	/influence/influence_node/influenced_by	/m/06bss	0
/m/015n8	/influence/influence_node/influenced_by	/m/030dr	1
/m/026n998	/education/field_of_study/students_majoring./education/education/major_field_of_study	/m/015wc0	0
/m/04xrx	/award/award_nominee/award_nominations./award/award_nomination/award	/m/01c427	1
/m/032zg9	/film/film/dubbing_performances./film/dubbing_performance/actor	/m/029h7y	0
/m/05rx__	/influence/influence_node/influenced_by	/m/02fn5	1
/m/03r8tl	/baseball/baseball_team/team_stats./baseball/baseball_team_stats/season	/m/05wh0sh	0
/m/06s1qy	/award/award_nominee/award_nominations./award/award_nomination/nominated_for	/m/0yx_w	1
/m/02tr7d	/dataworld/gardening_hint/split_to	/m/063_t	0
/m/0gywn	/music/genre/artists	/m/012z8_	1
/m/05nlx4	/base/culturalevent/event/entity_involved	/m/01v27pl	0
/m/036qs_	/award/award_nominee/award_nominations./award/award_nomination/award	/m/02x4wr9	1
/m/0988cp	/government/politician/government_positions_held./government/government_position_held/jurisdiction_of_office	/m/0l2yf	0
/m/01xrlm	/education/university/international_tuition./measurement_unit/dated_money_value/currency	/m/01nv4h	1
/m/067nv	/award/award_nominated_work/award_nominations./award/award_nomination/nominated_for	/m/0jcx1	0
/m/064t9	/music/genre/artists	/m/013423	1
/m/07y9w5	/film/film/language	/m/0jjy0	0
/m/0c6qh	/base/popstra/celebrity/friendship./base/popstra/friendship/participant	/m/014zcr	1
/m/01wbgdv	/base/popstra/celebrity/friendship./base/popstra/friendship/participant	/m/05ll37	0
/m/0c4f4	/award/award_nominee/award_nominations./award/award_nomination/award	/m/0cjyzs	1
/m/0c031k6	/base/popstra/celebrity/friendship./base/popstra/friendship/participant	/m/02x73k6	0
/m/0f830f	/film/actor/film./film/performance/film	/m/05k2xy	1
/m/0bwfn	/location/country/second_level_divisions	/m/026kqs9	0
/m/0347xl	/award/award_nominee/award_nominations./award/award_nomination/award_nominee	/m/0c3p7	1
/m/037d35	/location/administrative_division/first_level_division_of	/m/0d02km	0
/m/01438g	/award/award_winner/awards_won./award/award_honor/award_winner	/m/02__7n	1
/m/02xlf	/film/film/produced_by	/m/0gvvm6l	0
/m/01qnfc	/people/person/profession	/m/0dgd_	1
/m/0jsf6	/olympics/olympic_sport/athletes./olympics/olympic_athlete_affiliation/country	/m/07y0n	0
/m/0cqgl9	/award/award_category/nominees./award/award_nomination/nominated_for	/m/02rlj20	1
/m/03xb2w	/location/statistical_region/places_exported_to./location/imports_and_exports/exported_to	/m/047tsx3	0
/m/07jjt	/olympics/olympic_sport/athletes./olympics/olympic_athlete_affiliation/country	/m/09pmkv	1
/m/0194d	/base/schemastaging/organization_extra/phone_number./base/schemastaging/phone_sandbox/service_language	/m/01445t	0
/m/08t7nz	/award/award_nominee/award_nominations./award/award_nomination/nominated_for	/m/04t6fk	1
/m/05ff6	/people/cause_of_death/people	/m/06ls0l	0
/m/0gjcrrw	/film/film/release_date_s./film/film_regional_release_date/film_release_region	/m/0k6nt	1
/m/02z13jg	/organization/organization/child./organization/organization_relationship/child	/m/02t1cp	0
/m/034r25	/film/film/production_companies	/m/020h2v	1
/m/01722w	/organization/organization_founder/organizations_founded	/m/015wc0	0
/m/01438g	/award/award_nominee/award_nominations./award/award_nomination/award_nominee	/m/02__7n	1
/m/015wc0	/education/educational_institution/school_type	/m/0kcnq	0
/m/07s7gk6	/music/genre/parent_genre	/m/06by7	1
/m/0dzlk	/base/culturalevent/event/entity_involved	/m/0bwfn	0
/m/05r5c	/music/instrument/instrumentalists	/m/0ffgh	1
/m/0cbgl	/people/person/spouse_s./people/marriage/location_of_ceremony	/m/01wqg8	0
/m/0jhd	/location/location/adjoin_s./location/adjoining_relationship/adjoins	/m/0d0kn	1
/m/09kr66	/ice_hockey/hockey_team/current_roster./sports/sports_team_roster/position	/m/050kh5	0
/m/06s6hs	/award/award_nominee/award_nominations./award/award_nomination/award_nominee	/m/034x61	1
/m/0g4c1t	/film/film/distributors./film/film_film_distributor_relationship/region	/m/01xn6mc	0
/m/01l47f5	/award/award_winner/awards_won./award/award_honor/award_winner	/m/016sp_	1
/m/0dc95	/music/artist/contribution./music/recording_contribution/performance_role	/m/02d42t	0
/m/064t9	/music/genre/artists	/m/01q99h	1
/m/027nb	/influence/influence_node/influenced_by	/m/027cyf7	0
/m/07nnp_	/film/film/produced_by	/m/04fyhv	1
/m/0kb3n	/film/film/dubbing_performances./film/dubbing_performance/actor	/m/026f__m	0
/m/0fc1_	/location/location/adjoin_s./location/adjoining_relationship/adjoins	/m/0fkhz	1
/m/08z39v	/government/political_party/politicians_in_this_party./government/political_party_tenure/politician	/m/01nln	0
/m/078mm1	/film/film/produced_by	/m/03y3dk	1
/m/0j871	/film/film/film_art_direction_by	/m/03fmfs	0
/m/022wxh	/award/award_nominee/award_nominations./award/award_nomination/nominated_for	/m/04jwly	1
/m/027s39y	/education/educational_degree/people_with_this_degree./education/education/student	/m/04f6df0	0
/m/01yznp	/people/person/religion	/m/0kpl	1
/m/011w20	/film/film/distributors./film/film_film_distributor_relationship/film_distribution_medium	/m/0621cs	0
/m/0345h	/olympics/olympic_participating_country/medals_won./olympics/olympic_medal_honor/olympics	/m/018qb4	1
/m/02xlf	/dataworld/gardening_hint/split_to	/m/01m4yn	0
/m/0gt1k	/award/ranked_item/appears_in_ranked_lists./award/ranking/list	/m/05glt	1
/m/0dc95	/sports/sports_team/roster./basketball/basketball_roster_position/position	/m/09kr66	0
/m/02114t	/award/award_nominee/award_nominations./award/award_nomination/award	/m/0bsjcw	1
/m/01w20rx	/people/person/spouse_s./people/marriage/spouse	/m/04vjh	0
/m/035yn8	/award/award_winning_work/awards_won./award/award_honor/award	/m/0p9sw	1
/m/0c4f4	/government/politician/government_positions_held./government/government_position_held/legislative_sessions	/m/0g4c1t	0
/m/05r5c	/music/instrument/instrumentalists	/m/013423	1
/m/012vd6	/base/popstra/celebrity/breakup./base/popstra/breakup/participant	/m/07y9w5	0
/m/02fwfb	/film/film/release_date_s./film/film_regional_release_date/film_release_distribution_medium	/m/029j_	1
/m/03_wm6	/education/university/international_tuition./measurement_unit/dated_money_value/currency	/m/02w9sd7	0
/m/016zp5	/award/award_nominee/award_nominations./award/award_nomination/award	/m/027cyf7	1
/m/06s6l	/film/film/film_festivals	/m/02xb2bt	0
/m/01q9b9	/people/person/place_of_birth	/m/06wxw	1
/m/01c65z	/film/film/cinematography	/m/0mx6c	0
/m/02pp1	/sports/sports_team/colors	/m/083jv	1
/m/050xxm	/film/film/distributors./film/film_film_distributor_relationship/region	/m/032zg9	0
/m/06by7	/music/genre/artists	/m/015cqh	1
/m/0mzkr	/language/human_language/countries_spoken_in	/m/05wh0sh	0
/m/01q7cb_	/base/popstra/celebrity/friendship./base/popstra/friendship/participant	/m/015f7	1
/m/0p07_	/music/genre/parent_genre	/m/03n0pv	0
/m/016h9b	/music/group_member/membership./music/group_membership/role	/m/05r5c	1
/m/01lqnff	/olympics/olympic_games/sports	/m/01722w	0
/m/020h2v	/film/film_distributor/films_distributed./film/film_film_distributor_relationship/film	/m/02q87z6	1
/m/01grpq	/education/university/domestic_tuition./measurement_unit/dated_money_value/currency	/m/02z13jg	0
/m/01_xtx	/base/popstra/celebrity/friendship./base/popstra/friendship/participant	/m/0bksh	1
/m/04205z	/film/film/film_festivals	/m/02zs4	0
/m/0gfmc_	/film/film_distributor/films_distributed./film/film_film_distributor_relationship/film	/m/0gjk1d	1
/m/0bwfn	/film/actor/film./film/performance/film	/m/0249kn	0
/m/02x73k6	/award/award_category/nominees./award/award_nomination/nominated_for	/m/07kh6f3	1
/m/04gr35	/education/university/domestic_tuition./measurement_unit/dated_money_value/currency	/m/09889g	0
/m/02k8k	/sports/sports_team_location/teams	/m/03zm00	1
/m/0g4c1t	/film/film/cinematography	/m/03s0w	0
/m/09cxm4	/film/film/release_date_s./film/film_regional_release_date/film_release_distribution_medium	/m/029j_	1
/m/0cwt70	/location/statistical_region/religions./location/religion_percentage/religion	/m/0194d	0
/m/0j0k	/location/location/contains	/m/01ppq	1
/m/07h9gp	/people/marriage_union_type/unions_of_this_type./people/marriage/location_of_ceremony	/m/02grdc	0
/m/01chg	/media_common/netflix_genre/titles	/m/0f42nz	1
/m/013q0p	/people/deceased_person/place_of_death	/m/032j_n	0
/m/07s846j	/award/award_winning_work/awards_won./award/award_honor/award	/m/02w9sd7	1
/m/07kdkfj	/music/instrument/family	/m/0ch280	0
/m/05c1t6z	/award/award_ceremony/awards_presented./award/award_honor/award_winner	/m/04glr5h	1
/m/0dhd5	/location/country/second_level_divisions	/m/03x_k5m	0
/m/0kfv9	/tv/tv_program/regular_cast./tv/regular_tv_appearance/actor	/m/02lfcm	1
/m/02tjl3	/music/group_member/membership./music/group_membership/role	/m/064lsn	0
/m/0g768	/music/record_label/artist	/m/0f0y8	1
/m/04kl74p	/education/university/fraternities_and_sororities	/m/03d6fyn	0
/m/08lr6s	/film/film/genre	/m/04xvlr	1
/m/03rl1g	/government/political_party/politicians_in_this_party./government/political_party_tenure/politician	/m/02_gzx	0
/m/0ggq0m	/music/genre/artists	/m/02sjp	1
/m/03zrc_	/base/popstra/celebrity/friendship./base/popstra/friendship/participant	/m/023vrq	0
/m/059gkk	/award/award_winner/awards_won./award/award_honor/award_winner	/m/02lg9w	1
/m/01c65z	/music/record_label/artist	/m/0d02km	0
/m/0gq_v	/award/award_category/nominees./award/award_nomination/nominated_for	/m/0m_h6	1
/m/0dhd5	/film/film/produced_by	/m/0bkf4	0
/m/03ryn	/olympics/olympic_participating_country/medals_won./olympics/olympic_medal_honor/olympics	/m/0kbvb	1
/m/0fphf3v	/base/popstra/celebrity/friendship./base/popstra/friendship/participant	/m/01gtbb	0
/m/024rdh	/film/film_distributor/films_distributed./film/film_film_distributor_relationship/film	/m/0_9l_	1
/m/0ch280	/soccer/football_player/current_team./sports/sports_team_roster/team	/m/013q0p	0
/m/0bmhvpr	/award/award_winning_work/awards_won./award/award_honor/award_winner	/m/02pv_d	1
/m/02x73k6	/film/film/release_date_s./film/film_regional_release_date/film_release_region	/m/03hbzj	0
/m/02fttd	/film/film/release_date_s./film/film_regional_release_date/film_release_region	/m/03_3d	1
/m/02vx4	/media_common/netflix_genre/titles	/m/0gd_b_	0
/m/027kp3	/education/educational_institution/students_graduates./education/education/student	/m/02lgj6	1
/m/0l339	/time/event/instance_of_recurring_event	/m/0j0k	0
/m/041288	/organization/organization/headquarters./location/mailing_address/citytown	/m/0177z	1
/m/05nlx4	/celebrities/celebrity/sexual_relationships./celebrities/romantic_relationship/celebrity	/m/01tntf	0
/m/04zkj5	/film/actor/film./film/performance/film	/m/026f__m	1
/m/05r6t	/award/award_nominee/award_nominations./award/award_nomination/nominated_for	/m/04pqqb	0
/m/06r4f	/tv/tv_program/genre	/m/06n90	1
/m/0cbgl	/government/politician/government_positions_held./government/government_position_held/jurisdiction_of_office	/m/0g4c1t	0
/m/0133_p	/music/genre/artists	/m/01wl38s	1
/m/02bg8v	/organization/organization_member/member_of./organization/organization_membership/organization	/m/0164v	0
/m/0bvls5	/people/person/profession	/m/02jknp	1
/m/01xn6mc	/award/award_winning_work/awards_won./award/award_honor/honored_for	/m/0n1v8	0
/m/026ps1	/people/person/nationality	/m/0d060g	1
/m/0l178	/music/performance_role/track_performances./music/track_contribution/role	/m/01wbgdv	0
/m/09n5t_	/music/genre/artists	/m/0gcs9	1
/m/0bkf4	/award/award_nominee/award_nominations./award/award_nomination/award	/m/02xb2bt	0
/m/01wy6	/music/performance_role/regular_performances./music/group_membership/group	/m/014pg1	1
/m/04f6df0	/people/ethnicity/people	/m/012f86	0
/m/0416y94	/film/film/produced_by	/m/01gzm2	1
/m/01l1rw	/award/award_category/winners./award/award_honor/award_winner	/m/01htxr	0
/m/060c4	/organization/role/leaders./organization/leadership/organization	/m/02dj3	1
/m/0b66qd	/government/politician/government_positions_held./government/government_position_held/basic_title	/m/04zjxcz	0
/m/033s6	/award/award_nominee/award_nominations./award/award_nomination/award	/m/03qbnj	1
/m/06m6p7	/sports/sports_position/players./sports/sports_team_roster/team	/m/0222qb	0
/m/09fb5	/award/award_winner/awards_won./award/award_honor/award_winner	/m/07yp0f	1
/m/077yk0	/award/award_winning_work/awards_won./award/award_honor/award	/m/01750n	0
/m/02pt6k_	/award/award_nominee/award_nominations./award/award_nomination/nominated_for	/m/05gnf	1
/m/012vd6	/travel/travel_destination/climate./travel/travel_destination_monthly_climate/month	/m/026ps1	0
/m/05tg3	/american_football/football_team/current_roster./sports/sports_team_roster/position	/m/01r3hr	1
/m/03f5vvx	/base/x2010fifaworldcupsouthafrica/world_cup_squad/current_world_cup_squad./base/x2010fifaworldcupsouthafrica/current_world_cup_squad/current_club	/m/01xn6mc	0
/m/07wlt	/organization/organization/headquarters./location/mailing_address/citytown	/m/07ypt	1
/m/04205z	/base/aareas/schema/administrative_area/administrative_parent	/m/06j8wx	0
/m/04328m	/people/person/gender	/m/02zsn	1
/m/01722w	/education/educational_degree/people_with_this_degree./education/education/institution	/m/0l178	0
/m/04t6fk	/film/film/genre	/m/0gf28	1
/m/01fsv9	/people/person/gender	/m/06xkst	0
/m/0l6m5	/olympics/olympic_games/sports	/m/07jjt	1
/m/02vklm3	/media_common/netflix_genre/titles	/m/02z13jg	0
/m/0bmhvpr	/film/film/release_date_s./film/film_regional_release_date/film_release_region	/m/03h64	1
/m/01cwkq	/film/film/genre	/m/0p07_	0
/m/01ljpm	/education/educational_institution/colors	/m/04mkbj	1
/m/02bg8v	/education/educational_degree/people_with_this_degree./education/education/major_field_of_study	/m/0bwfn	0
/m/01vsy95	/music/artist/track_contributions./music/track_contribution/role	/m/026t6	1
/m/074qgb	/base/schemastaging/organization_extra/phone_number./base/schemastaging/phone_sandbox/service_language	/m/05kwx2	0
/m/0yx_w	/film/film/language	/m/02bjrlw	1
/m/016k6x	/media_common/netflix_genre/titles	/m/02ngbs	0
/m/02cg7g	/government/legislative_session/members./government/government_position_held/district_represented	/m/0vmt	1
/m/026f__m	/film/film/executive_produced_by	/m/0k7tq	0
/m/034rd	/government/politician/government_positions_held./government/government_position_held/legislative_sessions	/m/05rrw9	1
/m/04_tv	/sports/sports_team/roster./baseball/baseball_roster_position/position	/m/01xn6mc	0
/m/09jm8	/award/award_nominee/award_nominations./award/award_nomination/award	/m/01c4_6	1
/m/01n4w	/people/ethnicity/geographic_distribution	/m/03xl77	0
/m/0fq27fp	/film/film/estimated_budget./measurement_unit/dated_money_value/currency	/m/01nv4h	1
/m/04vjh	/influence/influence_node/peers./influence/peer_relationship/peers	/m/0294mx	0
/m/05xf75	/award/award_nominee/award_nominations./award/award_nomination/award	/m/057xs89	1
/m/024lt6	/people/person/place_of_birth	/m/01n4w	0
/m/03gr7w	/award/award_nominee/award_nominations./award/award_nomination/award	/m/01c427	1
/m/01twdk	/film/film/written_by	/m/0837ql	0
/m/018wrk	/olympics/olympic_games/sports	/m/02bkg	1
/m/01c9f2	/film/film/personal_appearances./film/personal_film_appearance/person	/m/027kp3	0
/m/04sntd	/film/film/genre	/m/01jfsb	1
/m/02hsq3m	/film/film/produced_by	/m/05b2gsm	0
/m/01kv4mb	/award/award_nominated_work/award_nominations./award/award_nomination/nominated_for	/m/0bhvtc	1
/m/02vx4	/base/popstra/location/vacationers./base/popstra/vacation_choice/vacationer	/m/03lgg	0
/m/01yg9y	/award/award_nominee/award_nominations./award/award_nomination/award_nominee	/m/06jvj7	1
/m/02ctyy	/award/award_winning_work/awards_won./award/award_honor/honored_for	/m/02rlj20	0
/m/02hfp_	/people/person/profession	/m/02jknp	1
/m/0gfmc_	/sports/sports_team/roster./american_football/football_roster_position/position	/m/01f9zw	0
/m/08vlns	/music/genre/artists	/m/03c602	1
/m/035zr0	/time/event/instance_of_recurring_event	/m/0dhdp	0
/m/01l47f5	/award/award_winner/awards_won./award/award_honor/award_winner	/m/01ww2fs	1
/m/0cxn2	/travel/travel_destination/climate./travel/travel_destination_monthly_climate/month	/m/0b9rdk	0
/m/04x4s2	/tv/tv_producer/programs_produced./tv/tv_producer_term/program	/m/0kfv9	1
/m/07w6r	/film/film/dubbing_performances./film/dubbing_performance/actor	/m/0k7tq	0
/m/01mszz	/award/award_winning_work/awards_won./award/award_honor/award	/m/05b1610	1
/m/01c99j	/government/legislative_session/members./government/government_position_held/district_represented	/m/06xkst	0
/m/073h5b	/award/award_ceremony/awards_presented./award/award_honor/honored_for	/m/0_9l_	1
/m/03fmfs	/film/film/other_crew./film/film_crew_gig/film_crew_role	/m/01j7pt	0
/m/09bymc	/award/award_ceremony/awards_presented./award/award_honor/honored_for	/m/046488	1
/m/0ch280	/education/educational_institution/school_type	/m/06wm0z	0
/m/0hmtk	/sports/sports_team/sport	/m/03tmr	1
/m/07yw6t	/education/educational_institution/school_type	/m/0vmt	0
/m/082scv	/film/film/music	/m/01l1rw	1
/m/069ld1	/education/educational_degree/people_with_this_degree./education/education/student	/m/047tsx3	0
/m/01vw37m	/award/award_nominee/award_nominations./award/award_nomination/award_nominee	/m/026r8q	1
/m/03f5vvx	/time/event/locations	/m/050xxm	0
/m/05jcn8	/award/award_nominee/award_nominations./award/award_nomination/award	/m/0gqzz	1
/m/01t_wfl	/organization/organization/headquarters./location/mailing_address/citytown	/m/026g801	0
/m/059j2	/organization/organization_member/member_of./organization/organization_membership/organization	/m/018cqq	1
/m/01c65z	/tv/tv_program/regular_cast./tv/regular_tv_appearance/actor	/m/0gpx6	0
/m/05jcn8	/people/person/profession	/m/01d_h8	1
/m/01v27pl	/education/educational_institution/students_graduates./education/education/major_field_of_study	/m/01cwkq	0
/m/0bhtzw	/people/person/nationality	/m/0345h	1
/m/01j5sv	/base/popstra/location/vacationers./base/popstra/vacation_choice/vacationer	/m/02tr7d	0
/m/016sp_	/award/award_nominee/award_nominations./award/award_nomination/award_nominee	/m/01l47f5	1
/m/01tszq	/tv/tv_program/program_creator	/m/03rl1g	0
/m/06s6hs	/people/person/places_lived./people/place_lived/location	/m/0fr0t	1
/m/0173s9	/people/person/languages	/m/04328m	0
/m/0jmk7	/sports/sports_team/colors	/m/083jv	1
/m/07y9w5	/olympics/olympic_sport/athletes./olympics/olympic_athlete_affiliation/olympics	/m/033db3	0
/m/0g22z	/award/award_winning_work/awards_won./award/award_honor/award	/m/05b4l5x	1
/m/06pvr	/government/legislative_session/members./government/government_position_held/district_represented	/m/05j0wc	0
/m/0137g1	/music/artist/track_contributions./music/track_contribution/role	/m/05r5c	1
/m/01_xtx	/music/instrument/instrumentalists	/m/02rrh1w	0
/m/051m56	/award/award_winner/awards_won./award/award_honor/award_winner	/m/03cfjg	1
/m/02zs4	/base/schemastaging/organization_extra/phone_number./base/schemastaging/phone_sandbox/service_language	/m/05j0wc	0
/m/0g7pm1	/film/film/other_crew./film/film_crew_gig/film_crew_role	/m/0263ycg	1
/m/01nv4h	/sports/sports_team/sport	/m/02773nt	0
/m/0ptx_	/film/film/featured_film_locations	/m/0cr3d	1
/m/02px_23	/music/group_member/membership./music/group_membership/group	/m/06xkst	0
/m/0ch26b_	/award/award_winning_work/awards_won./award/award_honor/award	/m/018wdw	1
/m/02w70	/base/popstra/celebrity/friendship./base/popstra/friendship/participant	/m/04zjxcz	0
/m/047lj	/location/location/adjoin_s./location/adjoining_relationship/adjoins	/m/07t_x	1
/m/0b80__	/tv/tv_program/regular_cast./tv/regular_tv_appearance/actor	/m/015wc0	0
/m/02d4ct	/award/award_nominee/award_nominations./award/award_nomination/award_nominee	/m/02lkcc	1
/m/074qgb	/people/person/spouse_s./people/marriage/location_of_ceremony	/m/0vmt	0
/m/01n4bh	/music/genre/artists	/m/03j1p2n	1
/m/014pg1	/film/film/release_date_s./film/film_regional_release_date/film_regional_debut_venue	/m/04czx7	0
/m/01nxzv	/people/person/spouse_s./people/marriage/type_of_union	/m/01g63y	1
/m/02rlj20	/music/performance_role/guest_performances./music/recording_contribution/performance_role	/m/04jn6y7	0
/m/011yfd	/film/film/release_date_s./film/film_regional_release_date/film_release_distribution_medium	/m/029j_	1
/m/06qw_	/people/cause_of_death/people	/m/0gfmc_	0
/m/04qk12	/film/film/genre	/m/060__y	1
/m/01vs14j	/film/film/runtime./film/film_cut/film_release_region	/m/0fy59t	0
/m/03902	/travel/travel_destination/how_to_get_here./travel/transportation/mode_of_transportation	/m/025t3bg	1
/m/01twdk	/sports/professional_sports_team/draft_picks./sports/sports_league_draft_pick/school	/m/035zr0	0
/m/041jlr	/people/person/places_lived./people/place_lived/location	/m/02h6_6p	1
/m/04328m	/music/group_member/membership./music/group_membership/group	/m/0gvvm6l	0
/m/0hm4q	/organization/role/leaders./organization/leadership/organization	/m/02pbzv	1
/m/01z3bz	/film/film/release_date_s./film/film_regional_release_date/film_release_distribution_medium	/m/0mkdm	0
/m/03_gd	/people/person/profession	/m/02jknp	1
/m/07yw6t	/olympics/olympic_participating_country/athletes./olympics/olympic_athlete_affiliation/olympics	/m/01n4w	0
/m/02r6nbc	/award/award_category/disciplines_or_subjects	/m/02xlf	1
/m/05wh0sh	/base/x2010fifaworldcupsouthafrica/world_cup_squad/current_world_cup_squad./base/x2010fifaworldcupsouthafrica/current_world_cup_squad/current_club	/m/02rqwhl	0
/m/07c52	/media_common/netflix_genre/titles	/m/01vnbh	1
/m/06rny	/music/instrument/family	/m/04zjxcz	0
/m/01wkmgb	/music/group_member/membership./music/group_membership/role	/m/042v_gx	1
/m/01t21q	/base/schemastaging/organization_extra/phone_number./base/schemastaging/phone_sandbox/service_location	/m/0k9ts	0
/m/017s11	/award/award_nominee/award_nominations./award/award_nomination/award_nominee	/m/016bx2	1
/m/092kgw	/music/genre/parent_genre	/m/01g23m	0
/m/067ghz	/film/film/release_date_s./film/film_regional_release_date/film_release_region	/m/0345h	1
/m/06wm0z	/organization/organization/headquarters./location/mailing_address/state_province_region	/m/01f9zw	0
/m/0cmc26r	/film/film/release_date_s./film/film_regional_release_date/film_release_region	/m/06t8v	1
/m/02tjl3	/people/person/places_lived./people/place_lived/location	/m/06ls0l	0
/m/040t74	/people/person/gender	/m/02zsn	1
/m/04zjxcz	/language/human_language/countries_spoken_in	/m/05xvj	0
/m/02vx4	/olympics/olympic_sport/athletes./olympics/olympic_athlete_affiliation/country	/m/059j2	1
/m/01vl17	/government/legislative_session/members./government/government_position_held/legislative_sessions	/m/0hcr	0
/m/03kcyd	/award/award_nominee/award_nominations./award/award_nomination/award_nominee	/m/014zcr	1
/m/0c4f4	/tv/tv_network/programs./tv/tv_network_duration/program	/m/060s9	0
/m/01wn718	/music/artist/origin	/m/01_d4	1
/m/0bx0lc	/award/award_ceremony/awards_presented./award/award_honor/honored_for	/m/03khn	0
/m/01yhm	/sports/professional_sports_team/draft_picks./sports/sports_league_draft_pick/school	/m/0160nk	1
/m/01jmv8	/music/group_member/membership./music/group_membership/group	/m/01ync	0
/m/020h2v	/film/film_distributor/films_distributed./film/film_film_distributor_relationship/film	/m/072r5v	1
/m/0bzn6_	/film/film/country	/m/01t21q	0
/m/027ht3n	/award/award_nominee/award_nominations./award/award_nomination/award	/m/0cqh6z	1
/m/07k2x	/film/film/story_by	/m/015wc0	0
/m/02cx90	/award/award_nominee/award_nominations./award/award_nomination/award_nominee	/m/03cfjg	1
/m/016m5c	/people/person/sibling_s./people/sibling_relationship/sibling	/m/03n0pv	0
/m/01j5ts	/base/popstra/celebrity/dated./base/popstra/dated/participant	/m/09fb5	1
/m/01gy7r	/people/person/religion	/m/0bkf4	0
/m/0b80__	/people/person/employment_history./business/employment_tenure/company	/m/017s11	1
/m/039yzs	/film/film/costume_design_by	/m/027s39y	0
/m/01wj9y9	/people/person/profession	/m/018gz8	1
/m/0mw93	/people/person/spouse_s./people/marriage/spouse	/m/0163m1	0
/m/01hf6	/location/administrative_division/country	/m/05sb1	1
/m/0mx6c	/music/artist/contribution./music/recording_contribution/performance_role	/m/0mx6c	0
/m/05zl0	/education/educational_institution/students_graduates./education/education/major_field_of_study	/m/0dc_v	1
/m/03zrc_	/base/americancomedy/celebrity_impressionist/celebrities_impersonated	/m/04_tv	0
/m/01nvmd_	/award/award_nominee/award_nominations./award/award_nomination/award_nominee	/m/01gq0b	1
/m/02zccd	/award/award_category/winners./award/award_honor/ceremony	/m/01w20rx	0
/m/03bw6	/award/award_nominee/award_nominations./award/award_nomination/nominated_for	/m/0gxfz	1
/m/0flsf	/sports/sports_team/colors	/m/0fc9js	0
/m/012fvq	/education/educational_institution/students_graduates./education/education/major_field_of_study	/m/0fdys	1
/m/09g7vfw	/location/country/second_level_divisions	/m/01s753	0
/m/04ljl_l	/award/award_category/nominees./award/award_nomination/nominated_for	/m/029k4p	1
/m/03nyts	/sports/pro_athlete/teams./sports/sports_team_roster/team	/m/02_gzx	0
/m/06x58	/film/actor/film./film/performance/film	/m/0cmf0m0	1
/m/04vjh	/sports/professional_sports_team/draft_picks./sports/sports_league_draft_pick/school	/m/0g5838s	0
/m/01c4_6	/award/award_category/winners./award/award_honor/award_winner	/m/0dvqq	1
/m/0c031k6	/people/person/languages	/m/01c0cc	0
/m/069d71	/people/person/places_lived./people/place_lived/location	/m/0n1rj	1
/m/06rny	/sports/sports_league_draft/picks./sports/sports_league_draft_pick/school	/m/01l1rw	0
/m/02qfv5d	/media_common/netflix_genre/titles	/m/0296rz	1
/m/035zr0	/education/educational_degree/people_with_this_degree./education/education/major_field_of_study	/m/03f68r6	0
/m/028r4y	/award/award_nominee/award_nominations./award/award_nomination/award_nominee	/m/07h565	1
/m/01wbgdv	/film/film/distributors./film/film_film_distributor_relationship/film_distribution_medium	/m/04gr35	0
/m/07_l6	/music/instrument/instrumentalists	/m/082db	1
/m/01cwcr	/sports/pro_athlete/teams./sports/sports_team_roster/team	/m/0c4hnm	0
/m/07bs0	/olympics/olympic_sport/athletes./olympics/olympic_athlete_affiliation/country	/m/047lj	1
/m/0gy30w	/film/actor/film./film/performance/film	/m/0d34_	0
/m/01tz_d	/ice_hockey/hockey_team/current_roster./sports/sports_team_roster/position	/m/02qvzf	1
/m/059j2	/film/film/story_by	/m/0qm8b	0
/m/01ypc	/sports/sports_team/roster./baseball/baseball_roster_position/position	/m/02dwn9	1
/m/02hsq3m	/education/educational_institution/students_graduates./education/education/student	/m/06bss	0
/m/0z05l	/award/award_nominee/award_nominations./award/award_nomination/award_nominee	/m/015p3p	1
/m/0h7t36	/people/ethnicity/people	/m/05b2gsm	0
/m/032nwy	/award/award_winner/awards_won./award/award_honor/award_winner	/m/01vsy95	1
/m/026n998	/olympics/olympic_participating_country/athletes./olympics/olympic_athlete_affiliation/olympics	/m/02_hj4	0
/m/031b3h	/award/award_category/winners./award/award_honor/award_winner	/m/01vvlyt	1
/m/02js9	/tv/tv_network/programs./tv/tv_network_duration/program	/m/033db3	0
/m/04g73n	/film/film/release_date_s./film/film_regional_release_date/film_release_distribution_medium	/m/029j_	1
/m/02_hj4	/people/person/place_of_birth	/m/0jmk7	0
/m/0hm4q	/organization/role/leaders./organization/leadership/organization	/m/02bbyw	1
/m/069ld1	/influence/influence_node/influenced_by	/m/0bx0lc	0
/m/0fqyc	/base/aareas/schema/administrative_area/capital	/m/0h095	1
/m/03rl1g	/government/political_party/politicians_in_this_party./government/political_party_tenure/politician	/m/0d02km	0
/m/042v_gx	/music/performance_role/track_performances./music/track_contribution/role	/m/0151b0	1
/m/08jbxf	/location/country/official_language	/m/05gml8	0
/m/02z13jg	/award/award_category/winners./award/award_honor/award_winner	/m/09fb5	1
/m/0k9ts	/film/film_set_designer/film_sets_designed	/m/01n4w	0
/m/05r6t	/music/genre/artists	/m/017lb_	1
/m/058cm	/user/jg/default_domain/olympic_games/sports	/m/06bss	0
/m/0bx_hnp	/film/film/release_date_s./film/film_regional_release_date/film_release_region	/m/0k6nt	1
/m/0dc7hc	/music/group_member/membership./music/group_membership/group	/m/02zrv7	0
/m/05c1t6z	/award/award_ceremony/awards_presented./award/award_honor/award_winner	/m/047c9l	1
/m/0ch280	/education/educational_institution/students_graduates./education/education/student	/m/07fj_	0
/m/012d40	/people/person/profession	/m/01d_h8	1
/m/0285m87	/film/film/story_by	/m/02xb2bt	0
/m/01bmlb	/award/award_nominee/award_nominations./award/award_nomination/award	/m/04ljl_l	1
/m/02vklm3	/award/award_ceremony/awards_presented./award/award_honor/award_winner	/m/07y0n	0
/m/02qydsh	/film/film/release_date_s./film/film_regional_release_date/film_release_distribution_medium	/m/029j_	1
/m/02_n3z	/olympics/olympic_sport/athletes./olympics/olympic_athlete_affiliation/country	/m/01nv4h	0
/m/02mc79	/award/award_nominee/award_nominations./award/award_nomination/award_nominee	/m/017s11	1
/m/08z39v	/film/film/dubbing_performances./film/dubbing_performance/actor	/m/0cg9f	0
/m/09tqx3	/people/person/languages	/m/07c9s	1
/m/0l2yf	/film/director/film	/m/0f2sq	0
/m/07t3x8	/award/award_nominee/award_nominations./award/award_nomination/award	/m/03rbj2	1
/m/0b9rdk	/people/person/gender	/m/01yznp	0
/m/0jrg	/film/film_subject/films	/m/049mql	1
/m/011w20	/location/country/capital	/m/01twdk	0
/m/057xs89	/award/award_category/winners./award/award_honor/award_winner	/m/0pmhf	1
/m/0dhdp	/film/film/dubbing_performances./film/dubbing_performance/actor	/m/0qm8b	0
/m/09b6zr	/people/person/religion	/m/02rsw	1
/m/06j8wx	/base/popstra/celebrity/canoodled./base/popstra/canoodled/participant	/m/01fsv9	0
/m/02zd460	/education/educational_institution/students_graduates./education/education/major_field_of_study	/m/0dc_v	1
/m/0dhd5	/award/award_category/winners./award/award_honor/ceremony	/m/0cwt70	0
/m/01_d4	/travel/travel_destination/climate./travel/travel_destination_monthly_climate/month	/m/0ll3	1
/m/06__m6	/film/film/prequel	/m/02tr7d	0
/m/01vsnff	/music/artist/track_contributions./music/track_contribution/role	/m/042v_gx	1
/m/04999m	/people/person/nationality	/m/03hbzj	0
/m/027986c	/award/award_category/winners./award/award_honor/award_winner	/m/0h5g_	1
/m/0h7t36	/film/film/cinematography	/m/01_xtx	0
/m/02n9nmz	/award/award_category/nominees./award/award_nomination/nominated_for	/m/09cr8	1
/m/01gw8b	/film/film/costume_design_by	/m/0jjy0	0
/m/0bl5c	/film/film/release_date_s./film/film_regional_release_date/film_release_distribution_medium	/m/029j_	1
/m/05mcjs	/music/group_member/membership./music/group_membership/role	/m/01gqfm	0
/m/01vvlyt	/award/award_winner/awards_won./award/award_honor/award_winner	/m/01vrt_c	1
/m/07c52	/influence/influence_node/influenced_by	/m/0366c	0
/m/02x73k6	/award/award_category/nominees./award/award_nomination/nominated_for	/m/0fy34l	1
/m/0mkdm	/location/hud_county_place/county	/m/0p07_	0
/m/0404j37	/film/film/release_date_s./film/film_regional_release_date/film_release_distribution_medium	/m/029j_	1
/m/01trxd	/film/film/release_date_s./film/film_regional_release_date/film_release_distribution_medium	/m/027s39y	0
/m/02vx4	/olympics/olympic_sport/athletes./olympics/olympic_athlete_affiliation/country	/m/03_3d	1
/m/05qjt	/music/performance_role/regular_performances./music/group_membership/group	/m/081lh	0
/m/083my7	/sports/sports_team/colors	/m/083jv	1
/m/05nlx4	/people/person/spouse_s./people/marriage/spouse	/m/035v3	0
/m/08gg47	/film/film/genre	/m/03k9fj	1
/m/04q42	/education/educational_institution/students_graduates./education/education/student	/m/045r_9	0
/m/0pz6q	/education/educational_institution/colors	/m/083jv	1
/m/04x4s2	/education/field_of_study/students_majoring./education/education/major_field_of_study	/m/03_3d	0
/m/0f4dx2	/award/award_winner/awards_won./award/award_honor/award_winner	/m/02tr7d	1
/m/0366c	/sports/sports_team/roster./american_football/football_roster_position/position	/m/01t_wfl	0
/m/05r5c	/music/instrument/instrumentalists	/m/0c73g	1
/m/0cwt70	/sports/professional_sports_team/draft_picks./sports/sports_league_draft_pick/draft	/m/05_6_y	0
/m/02vjzr	/music/genre/artists	/m/09qr6	1
/m/01tszq	/people/person/nationality	/m/04205z	0
/m/02lnbg	/music/genre/artists	/m/03f5spx	1
/m/03p85	/film/film/costume_design_by	/m/0dhd5	0
/m/019v9k	/education/educational_degree/people_with_this_degree./education/education/institution	/m/01vs5c	1
/m/01q8hj	/location/administrative_division/first_level_division_of	/m/03fmfs	0
/m/06j8wx	/award/award_winner/awards_won./award/award_honor/award_winner	/m/016gr2	1
/m/067nv	/base/localfood/seasonal_month/produce_available./base/localfood/produce_availability/seasonal_months	/m/04l57x	0
/m/024n3z	/award/award_winner/awards_won./award/award_honor/award_winner	/m/01kwld	1
/m/02vx4	/sports/sports_team/sport	/m/04gcd1	0
/m/07nnp_	/film/film/genre	/m/02js9	1
/m/0285m87	/location/location/adjoin_s./location/adjoining_relationship/adjoins	/m/06rny	0
/m/01mqz0	/base/popstra/celebrity/friendship./base/popstra/friendship/participant	/m/0bdt8	1
/m/02cg2v	/film/film/story_by	/m/01fsv9	0
/m/01_xtx	/base/popstra/celebrity/canoodled./base/popstra/canoodled/participant	/m/0bksh	1
/m/0gy30w	/film/film/edited_by	/m/0qm8b	0
/m/03_8r	/olympics/olympic_sport/athletes./olympics/olympic_athlete_affiliation/country	/m/0jdd	1
/m/0j871	/base/schemastaging/person_extra/net_worth./measurement_unit/dated_money_value/currency	/m/02_n3z	0
/m/077yk0	/award/award_nominee/award_nominations./award/award_nomination/award_nominee	/m/07m77x	1
/m/01xn6mc	/dataworld/gardening_hint/split_to	/m/01nv4h	0
/m/03zz8b	/people/person/place_of_birth	/m/0_3cs	1
/m/04205z	/film/film/production_companies	/m/06vkl	0
/m/03t79f	/film/film/executive_produced_by	/m/04flrx	1
/m/0k9p4	/sports/sports_position/players./sports/sports_team_roster/team	/m/013_vh	0
/m/02rmd_2	/film/film/release_date_s./film/film_regional_release_date/film_release_region	/m/0k6nt	1
/m/07c52	/film/film_subject/films	/m/0hcr	0
/m/04xvlr	/media_common/netflix_genre/titles	/m/089j8p	1
/m/0cbxl0	/people/person/place_of_birth	/m/0mkdm	0
/m/0hvb2	/film/actor/film./film/performance/film	/m/01flv_	1
/m/02tjl3	/film/film/other_crew./film/film_crew_gig/film_crew_role	/m/064lsn	0
/m/0bhvtc	/award/award_nominated_work/award_nominations./award/award_nomination/nominated_for	/m/0pmw9	1
/m/01q8hj	/celebrities/celebrity/celebrity_friends./celebrities/friendship/friend	/m/01jmv8	0
/m/07s846j	/award/award_winning_work/awards_won./award/award_honor/award	/m/02n9nmz	1
/m/026kqs9	/base/aareas/schema/administrative_area/administrative_parent	/m/016k6x	0
/m/01ypc	/baseball/baseball_team/team_stats./baseball/baseball_team_stats/season	/m/03c6sl9	1
/m/09kr66	/sports/sports_team/colors	/m/0988cp	0
/m/02qvzf	/sports/sports_position/players./sports/sports_team_roster/team	/m/032yps	1
/m/0837ql	/people/person/gender	/m/02ltg3	0
/m/02flq1	/award/award_category/winners./award/award_honor/ceremony	/m/02rjjll	1
/m/01grpq	/film/film/release_date_s./film/film_regional_release_date/film_release_distribution_medium	/m/0n1v8	0
/m/01zn4y	/organization/organization/headquarters./location/mailing_address/citytown	/m/0dhdp	1
/m/07yw6t	/tv/tv_network/programs./tv/tv_network_duration/program	/m/01f9zw	0
/m/01gb54	/film/film_distributor/films_distributed./film/film_film_distributor_relationship/film	/m/02ctc6	1
/m/06rny	/music/instrument/family	/m/0285m87	0
/m/0161c2	/people/person/nationality	/m/0d060g	1
/m/06qw_	/people/cause_of_death/people	/m/03n0pv	0
/m/02w9sd7	/award/award_category/nominees./award/award_nomination/nominated_for	/m/0gmgwnv	1
/m/06bss	/people/deceased_person/place_of_burial	/m/0d34_	0
/m/0309jm	/people/person/religion	/m/0kpl	1
/m/02tr7d	/people/person/nationality	/m/03fmfs	0
/m/0ds3t5x	/film/film/release_date_s./film/film_regional_release_date/film_release_region	/m/03h64	1
/m/01s9vc	/education/educational_institution/school_type	/m/06rny	0
/m/06wvfq	/award/award_nominee/award_nominations./award/award_nomination/award	/m/03r8v_	1
/m/034zc0	/film/film_distributor/films_distributed./film/film_film_distributor_relationship/film	/m/06rny	0
/m/05qfh	/education/field_of_study/students_majoring./education/education/student	/m/01mqh5	1
/m/0vmt	/people/marriage_union_type/unions_of_this_type./people/marriage/location_of_ceremony	/m/04sntd	0
/m/059j2	/sports/sports_team_location/teams	/m/02ltg3	1
/m/013q0p	/sports/professional_sports_team/draft_picks./sports/sports_league_draft_pick/school	/m/01nxzv	0
/m/02ndy4	/film/film/release_date_s./film/film_regional_release_date/film_release_distribution_medium	/m/029j_	1
/m/02rrh1w	/location/location/adjoin_s./location/adjoining_relationship/adjoins	/m/02hsq3m	0
/m/07csf4	/award/award_winner/awards_won./award/award_honor/award_winner	/m/016zp5	1
/m/013q0p	/music/artist/origin	/m/01tntf	0
/m/02j3w	/base/petbreeds/city_with_dogs/top_breeds./base/petbreeds/dog_city_relationship/dog_breed	/m/01t032	1
/m/026n998	/sports/sports_league_draft/picks./sports/sports_league_draft_pick/school	/m/0285m87	0
/m/01846t	/award/award_winner/awards_won./award/award_honor/award_winner	/m/024n3z	1
/m/02_n3z	/olympics/olympic_sport/athletes./olympics/olympic_athlete_affiliation/olympics	/m/016vn3	0
/m/05148p4	/music/instrument/instrumentalists	/m/0kvjrw	1
/m/0bx0lc	/location/country/second_level_divisions	/m/0fzm0g	0
/m/0181dw	/music/record_label/artist	/m/018dyl	1
/m/06xkst	/award/ranked_item/appears_in_ranked_lists./award/ranking/list	/m/0mx6c	0
/m/05qg6g	/people/person/places_lived./people/place_lived/location	/m/027rn	1
/m/033hqf	/base/biblioness/bibs_location/state	/m/0c031k6	0
/m/03bnv	/award/award_winner/awards_won./award/award_honor/award_winner	/m/018dyl	1
/m/063_t	/base/localfood/seasonal_month/produce_available./base/localfood/produce_availability/seasonal_months	/m/0qm8b	0
/m/015f7	/tv/tv_personality/tv_regular_appearances./tv/tv_regular_personal_appearance/program	/m/026bfsh	1
/m/0fvyg	/education/field_of_study/students_majoring./education/education/major_field_of_study	/m/07yw6t	0
/m/02pjvc	/film/actor/film./film/performance/film	/m/0bs8ndx	1
/m/0krdk	/base/popstra/celebrity/friendship./base/popstra/friendship/participant	/m/012j8z	0
/m/01b_d4	/education/university/international_tuition./measurement_unit/dated_money_value/currency	/m/01nv4h	1
/m/014vk4	/base/popstra/celebrity/friendship./base/popstra/friendship/participant	/m/0hcr	0
/m/0170pk	/award/award_nominee/award_nominations./award/award_nomination/nominated_for	/m/09gq0x5	1
/m/02ctyy	/base/americancomedy/celebrity_impressionist/celebrities_impersonated	/m/0cbgl	0
/m/0jsf6	/award/award_winning_work/awards_won./award/award_honor/honored_for	/m/0ptx_	1
/m/0g5838s	/location/administrative_division/country	/m/0drc1	0
/m/06y_n	/award/award_winning_work/awards_won./award/award_honor/award_winner	/m/086nl7	1
/m/012j8z	/award/award_nominee/award_nominations./award/award_nomination/award	/m/02vx4	0
/m/08s_lw	/award/award_nominee/award_nominations./award/award_nomination/award_nominee	/m/04mz10g	1
/m/02w9sd7	/location/country/form_of_government	/m/0n5yv	0
/m/06fmdb	/award/award_nominee/award_nominations./award/award_nomination/award_nominee	/m/0dvld	1
/m/06gbnc	/sports/sports_position/players./sports/sports_team_roster/team	/m/012vd6	0
/m/0gjcrrw	/film/film/release_date_s./film/film_regional_release_date/film_release_region	/m/03h64	1
/m/06ls0l	/people/person/spouse_s./people/marriage/location_of_ceremony	/m/04l57x	0
/m/024lt6	/award/award_winning_work/awards_won./award/award_honor/award	/m/02x73k6	1
/m/0kb3n	/organization/organization_founder/organizations_founded	/m/01hcvm	0
/m/08hmch	/film/film/release_date_s./film/film_regional_release_date/film_release_region	/m/07twz	1
/m/01tntf	/sports/sport/pro_athletes./sports/pro_sports_played/athlete	/m/04x4s2	0
/m/0428bc	/people/deceased_person/place_of_death	/m/02_286	1
/m/0h7t36	/medicine/disease/notable_people_with_this_condition	/m/02hsq3m	0
/m/0cg9f	/award/award_nominee/award_nominations./award/award_nomination/award	/m/02w9sd7	1
/m/0d02km	/location/location/time_zones	/m/081lh	0
/m/04cv9m	/film/film/music	/m/02cyfz	1
/m/04z4j2	/film/film/other_crew./film/film_crew_gig/crewmember	/m/0b9rdk	0
/m/06_6j3	/people/person/places_lived./people/place_lived/location	/m/05tbn	1
/m/06d4h	/award/award_category/winners./award/award_honor/award_winner	/m/01tntf	0
/m/0mzkr	/music/record_label/artist	/m/0232lm	1
/m/01q8hj	/government/legislative_session/members./government/government_position_held/legislative_sessions	/m/04jn6y7	0
/m/01j5ts	/people/person/profession	/m/02jknp	1
/m/0bx0lc	/education/field_of_study/students_majoring./education/education/student	/m/01v27pl	0
/m/01vsyjy	/base/schemastaging/person_extra/net_worth./measurement_unit/dated_money_value/currency	/m/01nv4h	1
/m/0l339	/base/aareas/schema/administrative_area/administrative_parent	/m/01nv4h	0
/m/01g1lp	/award/award_nominee/award_nominations./award/award_nomination/award	/m/02x4wr9	1
/m/0ch26b_	/sports/pro_athlete/teams./sports/sports_team_roster/team	/m/09g7vfw	0
/m/03f2_rc	/people/person/places_lived./people/place_lived/location	/m/0cr3d	1
/m/014pg1	/base/popstra/celebrity/breakup./base/popstra/breakup/participant	/m/02rsw	0
/m/03f0r5w	/award/award_nominee/award_nominations./award/award_nomination/award_nominee	/m/04j_gs	1
/m/0j871	/sports/sports_position/players./sports/sports_team_roster/team	/m/041r51	0
/m/01fh36	/music/genre/artists	/m/0163m1	1
/m/02kgb7	/base/popstra/celebrity/canoodled./base/popstra/canoodled/participant	/m/026n998	0
/m/012vd6	/award/award_nominee/award_nominations./award/award_nomination/award	/m/02f79n	1
/m/09fb5	/base/popstra/celebrity/dated./base/popstra/dated/participant	/m/07ytt	0
/m/014zcr	/base/popstra/celebrity/canoodled./base/popstra/canoodled/participant	/m/02z1yj	1
/m/01g23m	/award/award_nominee/award_nominations./award/award_nomination/award_nominee	/m/04jn6y7	0
/m/014zcr	/base/popstra/celebrity/dated./base/popstra/dated/participant	/m/02z1yj	1
/m/0d34_	/location/country/official_language	/m/059j2	0
/m/01l1ls	/award/award_nominee/award_nominations./award/award_nomination/award	/m/0bdw1g	1
/m/0flsf	/soccer/football_player/current_team./sports/sports_team_roster/team	/m/0fc9js	0
/m/0167q3	/base/biblioness/bibs_location/state	/m/01x73	1
/m/0jcx1	/base/culturalevent/event/entity_involved	/m/02rqwhl	0
/m/011_3s	/award/award_nominee/award_nominations./award/award_nomination/award_nominee	/m/01gbn6	1
/m/02rlj20	/award/award_nominee/award_nominations./award/award_nomination/award_nominee	/m/01c9f2	0
/m/06mzp	/olympics/olympic_participating_country/medals_won./olympics/olympic_medal_honor/olympics	/m/01f1kd	1
/m/01fb6d	/education/university/domestic_tuition./measurement_unit/dated_money_value/currency	/m/02ngbs	0
/m/03c602	/award/award_nominee/award_nominations./award/award_nomination/award	/m/02w7fs	1
/m/0dc7hc	/tv/tv_program/languages	/m/013_vh	0
/m/09gq0x5	/award/award_winning_work/awards_won./award/award_honor/award	/m/02x73k6	1
/m/02_hj4	/film/film/film_art_direction_by	/m/02xb2bt	0
/m/0cyhq	/people/deceased_person/place_of_burial	/m/01f38z	1
/m/04sntd	/location/location/partially_contains	/m/06gbnc	0
/m/095zlp	/film/film/featured_film_locations	/m/02_286	1
/m/0249kn	/award/award_category/nominees./award/award_nomination/nominated_for	/m/01wbgdv	0
/m/0456xp	/award/award_nominee/award_nominations./award/award_nomination/nominated_for	/m/03qcfvw	1
/m/02rlj20	/film/film/film_festivals	/m/02z13jg	0
/m/018wdw	/award/award_category/winners./award/award_honor/ceremony	/m/073hd1	1
/m/0flsf	/sports/professional_sports_team/draft_picks./sports/sports_league_draft_pick/school	/m/0fc9js	0
/m/01hmk9	/people/person/profession	/m/01d_h8	1
/m/05qjt	/tv/tv_personality/tv_regular_appearances./tv/tv_regular_personal_appearance/program	/m/06pvr	0
/m/0gkkf	/education/university/local_tuition./measurement_unit/dated_money_value/currency	/m/01nv4h	1
/m/01twdk	/location/administrative_division/country	/m/04_tv	0
/m/0dq_5	/organization/role/leaders./organization/leadership/organization	/m/03d6fyn	1
/m/02tr7d	/music/group_member/membership./music/group_membership/role	/m/04jn6y7	0
/m/02wh75	/award/award_category/winners./award/award_honor/ceremony	/m/02rjjll	1
/m/01trxd	/location/administrative_division/first_level_division_of	/m/0164v	0
/m/01j7pt	/tv/tv_network/programs./tv/tv_network_duration/program	/m/01j7mr	1
/m/013crh	/celebrities/celebrity/sexual_relationships./celebrities/romantic_relationship/celebrity	/m/013_vh	0
/m/0163m1	/award/award_nominee/award_nominations./award/award_nomination/award	/m/031b3h	1
/m/01htxr	/sports/sports_team/roster./american_football/football_roster_position/position	/m/0vmt	0
/m/0794g	/award/award_winner/awards_won./award/award_honor/award_winner	/m/026r8q	1
/m/03_wm6	/location/location/time_zones	/m/05wdgq	0
/m/02sg5v	/award/award_nominated_work/award_nominations./award/award_nomination/nominated_for	/m/0g5pvv	1
/m/035zr0	/award/award_nominee/award_nominations./award/award_nomination/award	/m/01g23m	0
/m/06by7	/music/genre/artists	/m/0gs6vr	1
/m/0fbx6	/base/popstra/celebrity/canoodled./base/popstra/canoodled/participant	/m/01bpc9	0
/m/02xwzh	/education/educational_institution/students_graduates./education/education/student	/m/038nv6	1
/m/02t1cp	/olympics/olympic_sport/athletes./olympics/olympic_athlete_affiliation/olympics	/m/05xvj	0
/m/042v_gx	/music/performance_role/regular_performances./music/group_membership/role	/m/0dwsp	1
/m/0154d7	/government/legislative_session/members./government/government_position_held/district_represented	/m/0jsf6	0
/m/07733f	/organization/organization/headquarters./location/mailing_address/citytown	/m/0r00l	1
/m/04_tv	/business/job_title/people_with_this_title./business/employment_tenure/company	/m/045r_9	0
/m/07g1sm	/film/film/release_date_s./film/film_regional_release_date/film_release_distribution_medium	/m/029j_	1
/m/05ll37	/education/university/fraternities_and_sororities	/m/0dc7hc	0
/m/02x73k6	/award/award_category/nominees./award/award_nomination/nominated_for	/m/04j4tx	1
/m/013zs9	/location/country/form_of_government	/m/01gtbb	0
/m/0pmhf	/award/award_nominee/award_nominations./award/award_nomination/nominated_for	/m/023gxx	1
/m/016z9n	/film/film_distributor/films_distributed./film/film_film_distributor_relationship/film	/m/02_n3z	0
/m/024n3z	/award/award_nominee/award_nominations./award/award_nomination/award_nominee	/m/01846t	1
/m/0249kn	/film/film/distributors./film/film_film_distributor_relationship/film_distribution_medium	/m/0285m87	0
/m/02x73k6	/award/award_category/winners./award/award_honor/award_winner	/m/016fjj	1
/m/059j2	/time/event/locations	/m/016z9n	0
/m/099cng	/award/award_category/winners./award/award_honor/award_winner	/m/0mz73	1
/m/0294zg	/olympics/olympic_sport/athletes./olympics/olympic_athlete_affiliation/country	/m/02rlj20	0
/m/0308kx	/award/award_winner/awards_won./award/award_honor/award_winner	/m/01wb8bs	1
/m/07w6r	/award/award_winner/awards_won./award/award_honor/award_winner	/m/01gwck	0
/m/0fpgp26	/film/film/release_date_s./film/film_regional_release_date/film_release_region	/m/09pmkv	1
/m/06qw_	/location/administrative_division/country	/m/01vs14j	0
/m/081lh	/influence/influence_node/influenced_by	/m/01s7qqw	1
/m/03fmfs	/award/award_nominee/award_nominations./award/award_nomination/award_nominee	/m/02t1cp	0
/m/064t9	/music/genre/artists	/m/026spg	1
/m/02ltg3	/film/film/written_by	/m/035zr0	0
/m/0gh6j94	/film/film/release_date_s./film/film_regional_release_date/film_release_region	/m/0345h	1
/m/032j_n	/tv/non_character_role/tv_regular_personal_appearances./tv/tv_regular_personal_appearance/person	/m/0fy59t	0
/m/0hnjt	/people/person/places_lived./people/place_lived/location	/m/01x73	1
/m/02rqwhl	/tv/tv_program/genre	/m/0dhd5	0
/m/019v9k	/education/educational_degree/people_with_this_degree./education/education/institution	/m/02zd460	1
/m/02xlf	/film/film/country	/m/06s6l	0
/m/0gq_d	/award/award_category/winners./award/award_honor/ceremony	/m/0bzknt	1
/m/092kgw	/film/film/dubbing_performances./film/dubbing_performance/actor	/m/0mw93	0
/m/01vz0g4	/award/award_nominee/award_nominations./award/award_nomination/award_nominee	/m/013w7j	1
/m/0c4hnm	/education/university/domestic_tuition./measurement_unit/dated_money_value/currency	/m/081lh	0
/m/02gvwz	/people/person/spouse_s./people/marriage/location_of_ceremony	/m/0nbfm	1
/m/0mzkr	/music/genre/parent_genre	/m/07k2x	0
/m/0k4f3	/film/film/written_by	/m/0c921	1
/m/0qm8b	/sports/sport/pro_athletes./sports/pro_sports_played/athlete	/m/02ctyy	0
/m/05148p4	/music/instrument/instrumentalists	/m/028q6	1
/m/0n1v8	/music/performance_role/guest_performances./music/recording_contribution/performance_role	/m/02pxst	0
/m/03lrht	/film/film/genre	/m/01jfsb	1
/m/01z3bz	/people/person/sibling_s./people/sibling_relationship/sibling	/m/01cwkq	0
/m/0khth	/award/award_nominee/award_nominations./award/award_nomination/award	/m/02ddq4	1
/m/0l2yf	/film/director/film	/m/012j8z	0
/m/02vx4	/sports/sport/pro_athletes./sports/pro_sports_played/athlete	/m/026n047	1
/m/07yw6t	/location/country/official_language	/m/02js9	0
/m/0b_72t	/base/marchmadness/ncaa_basketball_tournament/seeds./base/marchmadness/ncaa_tournament_seed/team	/m/02py8_w	1
/m/03n6r	/education/educational_institution/school_type	/m/041r51	0
/m/01d650	/organization/endowed_organization/endowment./measurement_unit/dated_money_value/currency	/m/01nv4h	1
/m/0542n	/film/film/distributors./film/film_film_distributor_relationship/region	/m/07y9w5	0
/m/06mxs	/travel/travel_destination/climate./travel/travel_destination_monthly_climate/month	/m/06vkl	1
/m/01bpc9	/sports/sports_team/roster./american_football/football_historical_roster_position/position_s	/m/03bdm4	0
/m/0g768	/music/record_label/artist	/m/012x03	1
/m/0294zg	/medicine/disease/notable_people_with_this_condition	/m/0g_bh	0
/m/099p5	/people/person/religion	/m/04pk9	1
/m/058cm	/people/person/sibling_s./people/sibling_relationship/sibling	/m/02_gzx	0
/m/0gjcrrw	/award/award_nominated_work/award_nominations./award/award_nomination/nominated_for	/m/0fphf3v	1
/m/01cwkq	/base/aareas/schema/administrative_area/capital	/m/0fc9js	0
/m/0fn2g	/travel/travel_destination/climate./travel/travel_destination_monthly_climate/month	/m/06vkl	1
/m/0542n	/film/film/release_date_s./film/film_regional_release_date/film_regional_debut_venue	/m/06m6p7	0
/m/060c4	/business/job_title/people_with_this_title./business/employment_tenure/company	/m/0288zy	1
/m/01nxzv	/base/popstra/location/vacationers./base/popstra/vacation_choice/vacationer	/m/06rny	0
/m/05r5c	/music/instrument/instrumentalists	/m/01vvy	1
/m/03s0w	/education/university/fraternities_and_sororities	/m/01twdk	0
/m/0ftps	/music/artist/track_contributions./music/track_contribution/role	/m/05r5c	1
/m/016z9n	/olympics/olympic_sport/athletes./olympics/olympic_athlete_affiliation/country	/m/060s9	0
/m/049n2l	/sports/sports_team/sport	/m/02vx4	1
/m/03d6fyn	/dataworld/gardening_hint/split_to	/m/05kwx2	0
/m/02d4ct	/award/award_nominee/award_nominations./award/award_nomination/award_nominee	/m/014zcr	1
/m/0285m87	/location/country/form_of_government	/m/01722w	0
/m/067ghz	/film/film/genre	/m/03k9fj	1
/m/01g0jn	/film/film/cinematography	/m/0249kn	0
/m/09krp	/base/biblioness/bibs_location/country	/m/0345h	1
/m/074qgb	/dataworld/gardening_hint/split_to	/m/0p07_	0
/m/0blpg	/film/film/genre	/m/06cvj	1
/m/04czx7	/people/person/places_lived./people/place_lived/location	/m/041r51	0
/m/027t8fw	/award/award_nominee/award_nominations./award/award_nomination/nominated_for	/m/072r5v	1
/m/01vs14j	/government/legislative_session/members./government/government_position_held/district_represented	/m/0fvyg	0
/m/012d40	/award/award_nominee/award_nominations./award/award_nomination/award	/m/0dgr5xp	1
/m/07fj_	/people/deceased_person/place_of_burial	/m/05kwx2	0
/m/05bt6j	/music/genre/artists	/m/015cqh	1
/m/02rmd_2	/film/film/genre	/m/0154d7	0
/m/064t9	/music/genre/artists	/m/01htxr	1
/m/027cyf7	/location/us_county/county_seat	/m/05mcjs	0
/m/01gvsn	/film/film/production_companies	/m/017s11	1
/m/06d4h	/film/film/release_date_s./film/film_regional_release_date/film_release_distribution_medium	/m/01ws9n6	0
/m/042ly5	/award/award_nominee/award_nominations./award/award_nomination/award_nominee	/m/016fjj	1
/m/01g23m	/organization/organization_member/member_of./organization/organization_membership/organization	/m/05kwx2	0
/m/07t_l23	/award/award_category/winners./award/award_honor/award_winner	/m/04jlgp	1
/m/04gcd1	/film/film/costume_design_by	/m/09fb5	0
/m/032zq6	/film/film/genre	/m/03rzvv	1
/m/02x73k6	/base/schemastaging/organization_extra/phone_number./base/schemastaging/phone_sandbox/service_language	/m/0mz73	0
/m/01gvxv	/people/person/gender	/m/02zsn	1
/m/01q8hj	/sports/professional_sports_team/draft_picks./sports/sports_league_draft_pick/school	/m/02rmd_2	0
/m/02fn5	/people/person/places_lived./people/place_lived/location	/m/02_286	1
/m/0164v	/language/human_language/countries_spoken_in	/m/0mzkr	0
/m/01gzm2	/award/award_nominee/award_nominations./award/award_nomination/award	/m/05b1610	1
/m/013crh	/base/schemastaging/organization_extra/phone_number./base/schemastaging/phone_sandbox/contact_category	/m/0k9p4	0
/m/044n3h	/award/award_winner/awards_won./award/award_honor/award_winner	/m/01sl1q	1
/m/01htxr	/organization/organization_founder/organizations_founded	/m/05gml8	0
/m/05r5c	/music/instrument/instrumentalists	/m/03j24kf	1
/m/03n0cd	/base/schemastaging/person_extra/net_worth./measurement_unit/dated_money_value/currency	/m/01fwf1	0
/m/060c4	/government/government_office_category/officeholders./government/government_position_held/jurisdiction_of_office	/m/07t_x	1
/m/07wjk	/award/award_nominee/award_nominations./award/award_nomination/award	/m/074qgb	0
/m/012j8z	/people/person/place_of_birth	/m/074r0	1
/m/013crh	/location/statistical_region/places_exported_to./location/imports_and_exports/exported_to	/m/04205z	0
/m/0h27vc	/people/person/profession	/m/018gz8	1
/m/01cwcr	/people/ethnicity/geographic_distribution	/m/0gd_b_	0
/m/024tcq	/government/legislative_session/members./government/government_position_held/district_represented	/m/02xry	1
/m/08jbxf	/location/country/official_language	/m/0flsf	0
/m/034zc0	/film/actor/film./film/performance/film	/m/029zqn	1
/m/0163m1	/film/film/production_companies	/m/0173s9	0
/m/05k2xy	/film/film/release_date_s./film/film_regional_release_date/film_release_distribution_medium	/m/029j_	1
/m/0gpx6	/travel/travel_destination/climate./travel/travel_destination_monthly_climate/month	/m/0bdlj	0
/m/03tn80	/film/film/language	/m/071fb	1
/m/01v27pl	/people/ethnicity/languages_spoken	/m/026ps1	0
/m/085ccd	/film/film/release_date_s./film/film_regional_release_date/film_release_region	/m/03h64	1
/m/0h_9252	/sports/sports_position/players./sports/sports_team_roster/team	/m/02pxst	0
/m/01rv7x	/people/ethnicity/people	/m/02n1p5	1
/m/02rrh1w	/tv/tv_program/languages	/m/03lgg	0
/m/07rlg	/olympics/olympic_sport/athletes./olympics/olympic_athlete_affiliation/country	/m/0165b	1
/m/0cwt70	/sports/sports_team/roster./american_football/football_roster_position/position	/m/012j8z	0
/m/0dc_v	/education/field_of_study/students_majoring./education/education/major_field_of_study	/m/05qjt	1
/m/02grdc	/location/us_county/county_seat	/m/07y9w5	0
/m/0g2jl	/education/educational_institution/students_graduates./education/education/major_field_of_study	/m/01mkq	1
/m/08hmch	/base/locations/continents/countries_within	/m/0234j5	0
/m/01x73	/location/location/contains	/m/0m2fr	1
/m/02vcp0	/people/ethnicity/geographic_distribution	/m/05kwx2	0
/m/0fdys	/education/field_of_study/students_majoring./education/education/student	/m/016h4r	1
/m/01wk3c	/music/genre/artists	/m/0fy59t	0
/m/02x4sn8	/award/award_category/nominees./award/award_nomination/nominated_for	/m/092vkg	1
/m/0drc1	/people/cause_of_death/people	/m/01tntf	0
/m/06l22	/sports/sports_team/sport	/m/02vx4	1
/m/064lsn	/award/award_winning_work/awards_won./award/award_honor/award	/m/0c031k6	0
/m/04j_gs	/people/person/places_lived./people/place_lived/location	/m/02_286	1
/m/05ff6	/base/popstra/celebrity/friendship./base/popstra/friendship/participant	/m/026n998	0
/m/01f1kd	/olympics/olympic_games/sports	/m/03tmr	1
/m/09fb5	/tv/tv_writer/tv_programs./tv/tv_program_writer_relationship/tv_program	/m/02h3d1	0
/m/040t74	/award/award_nominee/award_nominations./award/award_nomination/award_nominee	/m/022yb4	1
/m/01z3bz	/location/us_county/county_seat	/m/02ngbs	0
/m/013b6_	/people/ethnicity/people	/m/0hwqz	1
/m/033db3	/film/film/release_date_s./film/film_regional_release_date/film_regional_debut_venue	/m/01gw8b	0
/m/01hkhq	/award/award_nominee/award_nominations./award/award_nomination/award_nominee	/m/051wwp	1
/m/01w20rx	/film/film/film_festivals	/m/024lt6	0
/m/0k7pf	/award/award_nominee/award_nominations./award/award_nomination/award	/m/03qbnj	1
/m/05qjt	/baseball/baseball_team/team_stats./baseball/baseball_team_stats/season	/m/02hsq3m	0
/m/05q_dw	/film/film/featured_film_locations	/m/02_286	1
/m/06s6l	/film/film/edited_by	/m/0k9p4	0
/m/0194d	/olympics/olympic_sport/athletes./olympics/olympic_athlete_affiliation/country	/m/03ryn	1
/m/06pvr	/people/marriage_union_type/unions_of_this_type./people/marriage/location_of_ceremony	/m/02vqhv0	0
/m/08qxx9	/award/award_nominee/award_nominations./award/award_nomination/award_nominee	/m/0c6qh	1
/m/03x_k5m	/base/popstra/celebrity/friendship./base/popstra/friendship/participant	/m/01gtcc	0
/m/01m7pwq	/people/person/nationality	/m/0d060g	1
/m/04vjh	/award/ranked_item/appears_in_ranked_lists./award/ranking/list	/m/0dgq_kn	0
/m/014zcr	/award/award_nominee/award_nominations./award/award_nomination/award_nominee	/m/0c6qh	1
/m/05frqx	/education/university/fraternities_and_sororities	/m/063_t	0
/m/047c9l	/award/award_nominee/award_nominations./award/award_nomination/award	/m/09qs08	1
/m/0c031k6	/american_football/football_team/current_roster./sports/sports_team_roster/position	/m/0k7tq	0
/m/01jrp0	/people/person/spouse_s./people/marriage/spouse	/m/01rnxn	1
/m/0222qb	/location/administrative_division/country	/m/03n0pv	0
/m/01cf93	/music/record_label/artist	/m/05xq9	1
/m/01fb6d	/tv/tv_network/programs./tv/tv_network_duration/program	/m/01c0cc	0
/m/0bwfn	/education/educational_institution/students_graduates./education/education/student	/m/0f4dx2	1
/m/0fzm0g	/base/biblioness/bibs_location/state	/m/0ch280	0
/m/02681xs	/award/award_category/winners./award/award_honor/award_winner	/m/03c602	1
/m/0g4c1t	/time/event/instance_of_recurring_event	/m/032zg9	0
/m/044n3h	/people/person/places_lived./people/place_lived/location	/m/02_286	1
/m/06j8wx	/people/deceased_person/place_of_burial	/m/0892sx	0
/m/03z106	/film/film/runtime./film/film_cut/film_release_region	/m/0345h	1
/m/058cm	/tv/tv_producer/programs_produced./tv/tv_producer_term/program	/m/0dc95	0
/m/088xp	/organization/organization_member/member_of./organization/organization_membership/organization	/m/041288	1
/m/0g5qmbz	/media_common/netflix_genre/titles	/m/03rz4	0
/m/0347xl	/award/award_nominee/award_nominations./award/award_nomination/nominated_for	/m/015ppk	1
/m/05byxm	/education/educational_degree/people_with_this_degree./education/education/institution	/m/06ls0l	0
/m/02j490	/award/award_nominee/award_nominations./award/award_nomination/award	/m/02x73k6	1
/m/06m6p7	/base/americancomedy/celebrity_impressionist/celebrities_impersonated	/m/02js9	0
/m/0p9sw	/award/award_category/nominees./award/award_nomination/nominated_for	/m/012s1d	1
/m/0d02km	/film/director/film	/m/09kr66	0
/m/032j_n	/organization/organization/headquarters./location/mailing_address/citytown	/m/02_286	1
/m/01qdhx	/tv/tv_program/regular_cast./tv/regular_tv_appearance/actor	/m/034zc0	0
/m/05b2gsm	/award/award_nominee/award_nominations./award/award_nomination/nominated_for	/m/042y1c	1
/m/01s9vc	/people/person/place_of_birth	/m/05t54s	0
/m/05sq0m	/award/award_nominee/award_nominations./award/award_nomination/award_nominee	/m/051m56	1
/m/01w20rx	/base/localfood/seasonal_month/produce_available./base/localfood/produce_availability/seasonal_months	/m/0222qb	0
/m/02lfl4	/award/award_nominee/award_nominations./award/award_nomination/award_nominee	/m/0bl60p	1
/m/04gr35	/government/legislative_session/members./government/government_position_held/district_represented	/m/09g7vfw	0
/m/0137n0	/award/award_nominee/award_nominations./award/award_nomination/award	/m/02sp_v	1
/m/07wjk	/american_football/football_team/current_roster./sports/sports_team_roster/position	/m/01_xtx	0
/m/0g_bh	/music/genre/parent_genre	/m/06by7	1
/m/01t21q	/film/film/country	/m/06d4h	0
/m/03_8r	/olympics/olympic_sport/athletes./olympics/olympic_athlete_affiliation/country	/m/07twz	1
/m/02rrh1w	/base/popstra/location/vacationers./base/popstra/vacation_choice/vacationer	/m/01t_wfl	0
/m/056k77g	/film/film/genre	/m/01hmnh	1
/m/0b9rdk	/base/biblioness/bibs_location/state	/m/0249kn	0
/m/02mxbd	/people/person/gender	/m/02zsn	1
/m/03s0w	/people/profession/specialization_of	/m/0294zg	0
/m/02r6gw6	/sports/sports_league_draft/picks./sports/sports_league_draft_pick/school	/m/027mdh	1
/m/041r51	/ice_hockey/hockey_team/current_roster./sports/sports_team_roster/position	/m/032zg9	0
/m/09j028	/soccer/football_player/current_team./sports/sports_team_roster/team	/m/045xx	1
/m/04l57x	/people/person/nationality	/m/0mzkr	0
/m/0478__m	/award/award_nominee/award_nominations./award/award_nomination/award_nominee	/m/0dvqq	1
/m/07h76	/location/administrative_division/first_level_division_of	/m/02pxst	0
/m/091z_p	/film/film/release_date_s./film/film_regional_release_date/film_release_distribution_medium	/m/029j_	1
/m/01wbgdv	/film/film/runtime./film/film_cut/film_release_region	/m/01c0cc	0
/m/026m3y	/education/university/domestic_tuition./measurement_unit/dated_money_value/currency	/m/01nv4h	1
/m/03x_k5m	/film/film/story_by	/m/02vqhv0	0
/m/0pmw9	/award/award_nominated_work/award_nominations./award/award_nomination/nominated_for	/m/03cfjg	1
/m/02rmd_2	/education/field_of_study/students_majoring./education/education/major_field_of_study	/m/0154d7	0
/m/0gvsh7l	/award/award_winning_work/awards_won./award/award_honor/award_winner	/m/01gq0b	1
/m/05mcjs	/music/record_label/artist	/m/0ght2	0
/m/054g1r	/film/film_distributor/films_distributed./film/film_film_distributor_relationship/film	/m/027s39y	1
/m/0d34_	/sports/sports_league/teams./sports/sports_league_participation/team	/m/03f5vvx	0
/m/02vx4	/olympics/olympic_sport/athletes./olympics/olympic_athlete_affiliation/country	/m/06srk	1
/m/0194d	/film/film_distributor/films_distributed./film/film_film_distributor_relationship/film	/m/0bdlj	0
/m/01q8hj	/education/educational_institution/colors	/m/083jv	1
/m/0cg9f	/media_common/netflix_genre/titles	/m/0cg9f	0
/m/01hmnh	/media_common/netflix_genre/titles	/m/0fzm0g	1
/m/0d02km	/film/film/cinematography	/m/08z39v	0
/m/0g5y6	/people/ethnicity/people	/m/03bw6	1
/m/0drc1	/film/film/costume_design_by	/m/05g56	0
/m/0794g	/award/award_nominee/award_nominations./award/award_nomination/award	/m/05pcn59	1
/m/0j1z8	/location/location/time_zones	/m/07w6r	0
/m/051z6mv	/award/award_nominee/award_nominations./award/award_nomination/award_nominee	/m/0cb77r	1
/m/0234j5	/people/person/religion	/m/01m4yn	0
/m/0794g	/award/award_winner/awards_won./award/award_honor/award_winner	/m/01vw37m	1
/m/01q8hj	/award/award_category/disciplines_or_subjects	/m/05frqx	0
/m/047msdk	/film/film/release_date_s./film/film_regional_release_date/film_release_region	/m/06mzp	1
/m/01ws9n6	/location/country/official_language	/m/02js9	0
/m/02qt02v	/award/award_category/winners./award/award_honor/award_winner	/m/04k25	1
/m/014bpd	/government/political_party/politicians_in_this_party./government/political_party_tenure/politician	/m/04z4j2	0
/m/02_286	/base/petbreeds/city_with_dogs/top_breeds./base/petbreeds/dog_city_relationship/dog_breed	/m/01t032	1
/m/01g23m	/dataworld/gardening_hint/split_to	/m/0mkdm	0
/m/05lfwd	/award/award_winning_work/awards_won./award/award_honor/award	/m/0gkts9	1
/m/07yk1xz	/american_football/football_team/current_roster./sports/sports_team_roster/position	/m/012dtf	0
/m/02tr7d	/award/award_winner/awards_won./award/award_honor/award_winner	/m/051wwp	1
/m/03n6r	/music/artist/track_contributions./music/track_contribution/role	/m/04_tv	0
/m/0bbm7r	/award/award_winning_work/awards_won./award/award_honor/award_winner	/m/016ywr	1
/m/02zccd	/education/educational_institution/students_graduates./education/education/student	/m/07y9w5	0
/m/01gvyp	/people/person/place_of_birth	/m/0lphb	1
/m/04kl74p	/location/statistical_region/religions./location/religion_percentage/religion	/m/03n0cd	0
/m/0cjk9	/language/human_language/countries_spoken_in	/m/01mjq	1
/m/01c9f2	/media_common/netflix_genre/titles	/m/02w70	0
/m/01gb54	/film/film_distributor/films_distributed./film/film_film_distributor_relationship/film	/m/0gldyz	1
/m/0cwt70	/people/person/place_of_birth	/m/027nb	0
/m/03mnk	/base/schemastaging/organization_extra/phone_number./base/schemastaging/phone_sandbox/contact_category	/m/014dgf	1
/m/03n6r	/award/award_category/nominees./award/award_nomination/nominated_for	/m/04f6df0	0
/m/012vwb	/education/university/fraternities_and_sororities	/m/035tlh	1
/m/0qm8b	/film/film/costume_design_by	/m/03_wm6	0
/m/03clrng	/award/award_nominee/award_nominations./award/award_nomination/award_nominee	/m/026dg51	1
/m/0b80__	/music/record_label/artist	/m/03rz4	0
/m/07s846j	/award/award_winning_work/awards_won./award/award_honor/award	/m/09d28z	1
/m/015wc0	/base/popstra/celebrity/dated./base/popstra/dated/participant	/m/01_xtx	0
/m/06fpsx	/film/film/produced_by	/m/05ty4m	1
/m/01g23m	/music/record_label/artist	/m/0jjy0	0
/m/02r251z	/award/award_nominee/award_nominations./award/award_nomination/nominated_for	/m/0ch3qr1	1
/m/0621cs	/award/award_winning_work/awards_won./award/award_honor/award_winner	/m/02pxst	0
/m/07_l6	/music/performance_role/regular_performances./music/group_membership/role	/m/05148p4	1
/m/04f6df0	/education/educational_degree/people_with_this_degree./education/education/student	/m/013crh	0
/m/02yv6b	/music/genre/artists	/m/016h9b	1
/m/03xb2w	/education/educational_institution/colors	/m/034zc0	0
/m/01sl1q	/base/popstra/celebrity/friendship./base/popstra/friendship/participant	/m/049qx	1
/m/03_wm6	/base/localfood/seasonal_month/produce_available./base/localfood/produce_availability/seasonal_months	/m/07yk1xz	0
/m/0410cp	/people/person/religion	/m/04pk9	1
/m/0k9p4	/film/film/other_crew./film/film_crew_gig/film_crew_role	/m/06__m6	0
/m/092kgw	/people/person/profession	/m/01d_h8	1
/m/0kcnq	/people/deceased_person/place_of_death	/m/01hcvm	0
/m/051wwp	/award/award_nominee/award_nominations./award/award_nomination/nominated_for	/m/092vkg	1
/m/07ytt	/people/person/languages	/m/05_6_y	0
/m/0127ps	/film/film/release_date_s./film/film_regional_release_date/film_release_distribution_medium	/m/029j_	1
/m/05_6_y	/education/educational_institution/school_type	/m/05b2gsm	0
/m/0gwjw0c	/film/film/release_date_s./film/film_regional_release_date/film_release_region	/m/0345h	1
/m/0285m87	/tv/tv_writer/tv_programs./tv/tv_program_writer_relationship/tv_program	/m/09889g	0
/m/02qcr	/film/film/genre	/m/073_6	1
/m/01s9vc	/film/film/genre	/m/09g7vfw	0
/m/092kgw	/award/award_nominee/award_nominations./award/award_nomination/nominated_for	/m/02mt51	1
/m/04344j	/film/film/cinematography	/m/02hsq3m	0
/m/03fnqj	/sports/sports_team/sport	/m/02vx4	1
/m/04z4j2	/education/educational_degree/people_with_this_degree./education/education/major_field_of_study	/m/081lh	0
/m/024lt6	/film/film/production_companies	/m/020h2v	1
/m/01trxd	/base/x2010fifaworldcupsouthafrica/world_cup_squad/current_world_cup_squad./base/x2010fifaworldcupsouthafrica/current_world_cup_squad/current_club	/m/064lsn	0
/m/015mrk	/award/award_nominee/award_nominations./award/award_nomination/award_nominee	/m/0bkf4	1
/m/0222qb	/film/film/story_by	/m/03bdm4	0
/m/02rqxc	/sports/sports_team/sport	/m/02vx4	1
/m/0c031k6	/influence/influence_node/peers./influence/peer_relationship/peers	/m/01c0cc	0
/m/02rg_4	/education/educational_institution/colors	/m/083jv	1
/m/06vkl	/people/person/profession	/m/08z39v	0
/m/03ftmg	/people/person/profession	/m/02jknp	1
/m/02n9nmz	/government/politician/government_positions_held./government/government_position_held/jurisdiction_of_office	/m/04sntd	0
/m/09_bl	/olympics/olympic_sport/athletes./olympics/olympic_athlete_affiliation/country	/m/01mjq	1
/m/01lqnff	/film/film/other_crew./film/film_crew_gig/crewmember	/m/05r6t	0
/m/07_53	/olympics/olympic_sport/athletes./olympics/olympic_athlete_affiliation/country	/m/07fj_	1
/m/02ngbs	/people/person/languages	/m/04999m	0
/m/051wwp	/award/award_winner/awards_won./award/award_honor/award_winner	/m/01sp81	1
/m/02rmd_2	/film/film/film_art_direction_by	/m/0294zg	0
/m/0dvld	/award/award_nominee/award_nominations./award/award_nomination/award_nominee	/m/015q43	1
/m/04jn6y7	/organization/organization/place_founded	/m/02w70	0
/m/0kbvb	/olympics/olympic_games/sports	/m/07gyv	1
/m/01t21q	/location/hud_county_place/county	/m/03_3d	0
/m/01pkhw	/people/person/place_of_birth	/m/01xr6x	1
/m/03f5vvx	/film/film/prequel	/m/01ync	0
/m/0l6px	/award/award_nominee/award_nominations./award/award_nomination/award_nominee	/m/01hkhq	1
/m/04jwly	/base/x2010fifaworldcupsouthafrica/world_cup_squad/current_world_cup_squad./base/x2010fifaworldcupsouthafrica/current_world_cup_squad/current_club	/m/0g5qmbz	0
/m/03n_7k	/award/award_nominee/award_nominations./award/award_nomination/award	/m/02x73k6	1
/m/04f6df0	/olympics/olympic_participating_country/medals_won./olympics/olympic_medal_honor/olympics	/m/027s39y	0
/m/07c52	/media_common/netflix_genre/titles	/m/02rcwq0	1
/m/0137n0	/film/film/film_festivals	/m/02z13jg	0
/m/060c4	/government/government_office_category/officeholders./government/government_position_held/jurisdiction_of_office	/m/0jhd	1
/m/03rz4	/government/politician/government_positions_held./government/government_position_held/legislative_sessions	/m/04pqqb	0
/m/0gvvm6l	/film/film/release_date_s./film/film_regional_release_date/film_release_region	/m/06mzp	1
/m/08xvpn	/medicine/symptom/symptom_of	/m/0l2yf	0
/m/0794g	/award/award_nominee/award_nominations./award/award_nomination/nominated_for	/m/03cmsqb	1
/m/0g5qmbz	/tv/tv_producer/programs_produced./tv/tv_producer_term/program	/m/026kqs9	0
/m/0g55tzk	/award/award_ceremony/awards_presented./award/award_honor/award_winner	/m/016gr2	1
/m/01gtbb	/influence/influence_node/peers./influence/peer_relationship/peers	/m/013crh	0
/m/09k0f	/people/person/nationality	/m/0d04z6	1
/m/0837ql	/film/film/cinematography	/m/01j5sv	0
/m/03v0t	/location/location/contains	/m/065r8g	1
/m/04sntd	/film/film/executive_produced_by	/m/04kl74p	0
/m/0243cq	/film/film/release_date_s./film/film_regional_release_date/film_release_region	/m/0k6nt	1
/m/033db3	/time/event/instance_of_recurring_event	/m/05ff6	0
/m/01yhm	/sports/sports_team/colors	/m/083jv	1
/m/03rl1g	/people/person/religion	/m/0b5x23	0
/m/02x1z2s	/award/award_category/nominees./award/award_nomination/nominated_for	/m/06w99h3	1
/m/01nxzv	/music/record_label/artist	/m/0m32h	0
/m/01d5vk	/film/actor/film./film/performance/film	/m/0h1v19	1
/m/04zjxcz	/education/university/local_tuition./measurement_unit/dated_money_value/currency	/m/02yv_b	0
/m/0133_p	/music/genre/artists	/m/01vsnff	1
/m/0cxn2	/tv/tv_program/regular_cast./tv/regular_tv_appearance/actor	/m/03nyts	0
/m/016srn	/award/award_nominee/award_nominations./award/award_nomination/award	/m/01c9f2	1
/m/01s753	/ice_hockey/hockey_team/current_roster./sports/sports_team_roster/position	/m/01hcvm	0
/m/01ky7c	/education/educational_institution/students_graduates./education/education/student	/m/026spg	1
/m/0dc95	/music/performance_role/track_performances./music/track_contribution/role	/m/0ffgh	0
/m/032nl2	/film/actor/film./film/performance/film	/m/025rxjq	1
/m/067nv	/people/marriage_union_type/unions_of_this_type./people/marriage/location_of_ceremony	/m/03r8tl	0
/m/07wm6	/education/educational_institution/students_graduates./education/education/student	/m/03mdw3c	1
/m/0d34_	/user/alexander/philosophy/philosopher/interests	/m/027nb	0
/m/08tq4x	/film/film/release_date_s./film/film_regional_release_date/film_release_region	/m/059j2	1
/m/05xvj	/location/administrative_division/first_level_division_of	/m/01wqg8	0
/m/01x6v6	/award/award_nominee/award_nominations./award/award_nomination/nominated_for	/m/035bcl	1
/m/02rqwhl	/sports/sports_team_location/teams	/m/04pqqb	0
/m/02x1z2s	/award/award_category/nominees./award/award_nomination/nominated_for	/m/0315rp	1
/m/01w20rx	/sports/professional_sports_team/draft_picks./sports/sports_league_draft_pick/draft	/m/01qdhx	0
/m/0hhggmy	/film/film/release_date_s./film/film_regional_release_date/film_release_region	/m/059j2	1
/m/0mkdm	/medicine/symptom/symptom_of	/m/03xl77	0
/m/01x2tm8	/people/person/religion	/m/0kpl	1
/m/02pxst	/organization/endowed_organization/endowment./measurement_unit/dated_money_value/currency	/m/04_tv	0
/m/0mzkr	/music/record_label/artist	/m/01vrncs	1
/m/0vmt	/medicine/symptom/symptom_of	/m/03xb2w	0
/m/069_0y	/award/award_nominee/award_nominations./award/award_nomination/award_nominee	/m/02404v	1
/m/026qnh6	/sports/sports_team/roster./american_football/football_roster_position/position	/m/06rny	0
/m/018wdw	/award/award_category/winners./award/award_honor/award_winner	/m/04wp63	1
/m/02hsq3m	/travel/travel_destination/how_to_get_here./travel/transportation/mode_of_transportation	/m/02px_23	0
/m/07wjk	/education/educational_institution/colors	/m/083jv	1
/m/01wbgdv	/film/film/country	/m/01fsv9	0
/m/018wdw	/award/award_category/nominees./award/award_nomination/nominated_for	/m/03x7hd	1
/m/0ch280	/organization/organization/child./organization/organization_relationship/child	/m/02vcp0	0
/m/08lr6s	/award/award_winning_work/awards_won./award/award_honor/award_winner	/m/04fyhv	1
/m/026n998	/film/film/distributors./film/film_film_distributor_relationship/film_distribution_medium	/m/0ch280	0
/m/0407yfx	/film/film/genre	/m/01hmnh	1
/m/0mw93	/education/field_of_study/students_majoring./education/education/student	/m/04zjxcz	0
/m/04xvlr	/media_common/netflix_genre/titles	/m/01rwyq	1
/m/0bz6sq	/medicine/disease/risk_factors	/m/0p07_	0
/m/099flj	/award/award_category/nominees./award/award_nomination/nominated_for	/m/0fpv_3_	1
/m/01cwcr	/location/country/form_of_government	/m/02h3d1	0
/m/027s39y	/award/award_winning_work/awards_won./award/award_honor/award_winner	/m/05jcn8	1
/m/02tr7d	/music/performance_role/guest_performances./music/recording_contribution/performance_role	/m/01gtcc	0
/m/09qrn4	/award/award_category/nominees./award/award_nomination/nominated_for	/m/0124k9	1
/m/0294zg	/film/film/release_date_s./film/film_regional_release_date/film_release_region	/m/0837ql	0
/m/01yhm	/sports/professional_sports_team/draft_picks./sports/sports_league_draft_pick/school	/m/01fsv9	1
/m/09g7vfw	/award/award_ceremony/awards_presented./award/award_honor/award_winner	/m/03cffvv	0
/m/0192hw	/film/film/release_date_s./film/film_regional_release_date/film_release_region	/m/0d060g	1
/m/03n0cd	/influence/influence_node/influenced_by	/m/03_3d	0
/m/0gvbw	/base/schemastaging/organization_extra/phone_number./base/schemastaging/phone_sandbox/service_location	/m/0d060g	1
/m/01fsv9	/organization/endowed_organization/endowment./measurement_unit/dated_money_value/currency	/m/01r6jt2	0
/m/06z8s_	/film/film/genre	/m/04btyz	1
/m/0b66qd	/music/performance_role/regular_performances./music/group_membership/role	/m/03f68r6	0
/m/01wd9lv	/people/person/profession	/m/01d_h8	1
/m/01gtcc	/organization/organization_member/member_of./organization/organization_membership/organization	/m/02tr7d	0
/m/03zv9	/sports/sports_league/teams./sports/sports_league_participation/team	/m/045xx	1
/m/07kdkfj	/military/military_conflict/combatants./military/military_combatant_group/combatants	/m/016m5c	0
/m/07bdd_	/award/award_category/nominees./award/award_nomination/nominated_for	/m/03459x	1
/m/02hsq3m	/people/cause_of_death/people	/m/04z4j2	0
/m/026w_gk	/award/award_nominee/award_nominations./award/award_nomination/award_nominee	/m/02773nt	1
/m/02_hj4	/base/popstra/celebrity/breakup./base/popstra/breakup/participant	/m/027s39y	0
/m/03cfjg	/award/award_winner/awards_won./award/award_honor/award_winner	/m/01lmj3q	1
/m/04sntd	/people/ethnicity/languages_spoken	/m/0542n	0
/m/03x7hd	/film/film/other_crew./film/film_crew_gig/crewmember	/m/0bbxx9b	1
/m/06j8wx	/film/film/music	/m/07c52	0
/m/0fb7sd	/film/film/release_date_s./film/film_regional_release_date/film_release_distribution_medium	/m/029j_	1
/m/07y0n	/people/person/profession	/m/0qm8b	0
/m/06wxw	/base/petbreeds/city_with_dogs/top_breeds./base/petbreeds/dog_city_relationship/dog_breed	/m/0km3f	1
/m/01t21q	/people/ethnicity/people	/m/01w20rx	0
/m/0p4wb	/base/schemastaging/organization_extra/phone_number./base/schemastaging/phone_sandbox/service_language	/m/01r2l	1
/m/05mcjs	/tv/tv_program/program_creator	/m/05_6_y	0
/m/09kr66	/people/ethnicity/people	/m/05bnp0	1
/m/02_n3z	/tv/tv_writer/tv_programs./tv/tv_program_writer_relationship/tv_program	/m/07h76	0
/m/0250f	/people/person/profession	/m/01d_h8	1
/m/06gbnc	/sports/sports_team/sport	/m/013q0p	0
/m/04qp06	/award/award_nominee/award_nominations./award/award_nomination/award	/m/03rbj2	1
/m/03r8tl	/organization/organization_founder/organizations_founded	/m/02zrv7	0
/m/0c01c	/award/award_winner/awards_won./award/award_honor/award_winner	/m/01x_d8	1
/m/08z39v	/sports/sports_position/players./sports/sports_team_roster/team	/m/0d02km	0
/m/0b1xl	/organization/organization/headquarters./location/mailing_address/state_province_region	/m/03v0t	1
/m/081lh	/music/artist/origin	/m/07ytt	0
/m/01c0cc	/education/educational_institution/students_graduates./education/education/major_field_of_study	/m/04_tv	1
/m/016z9n	/film/film/language	/m/011w20	0
/m/02w9sd7	/award/award_category/nominees./award/award_nomination/nominated_for	/m/0yx_w	1
/m/0h7t36	/base/schemastaging/organization_extra/phone_number./base/schemastaging/phone_sandbox/contact_category	/m/05_6_y	0
/m/0187y5	/film/actor/film./film/performance/film	/m/02b6n9	1
/m/01c99j	/film/film/film_festivals	/m/027nb	0
/m/0fkhl	/location/us_county/county_seat	/m/01dljr	1
/m/03zrc_	/olympics/olympic_sport/athletes./olympics/olympic_athlete_affiliation/olympics	/m/045r_9	0
/m/05g3v	/american_football/football_team/current_roster./sports/sports_team_roster/position	/m/08ns5s	1
/m/05xvj	/base/popstra/celebrity/breakup./base/popstra/breakup/participant	/m/041r51	0
/m/0435vm	/film/film/produced_by	/m/05mvd62	1
/m/01xn6mc	/people/person/employment_history./business/employment_tenure/company	/m/02ltg3	0
/m/0dq_5	/business/job_title/people_with_this_title./business/employment_tenure/company	/m/0py9b	1
/m/026n998	/music/record_label/artist	/m/05kwx2	0
/m/026c1	/film/actor/film./film/performance/film	/m/0ch3qr1	1
/m/0b80__	/location/administrative_division/country	/m/0mzkr	0
/m/060c4	/organization/role/leaders./organization/leadership/organization	/m/01cf5	1
/m/0mzkr	/music/genre/parent_genre	/m/013crh	0
/m/01pj_5	/film/film/release_date_s./film/film_regional_release_date/film_release_distribution_medium	/m/029j_	1
/m/03rl1g	/sports/sports_team/roster./american_football/football_roster_position/position	/m/015wc0	0
/m/0dzlbx	/film/film/release_date_s./film/film_regional_release_date/film_release_region	/m/0d060g	1
/m/04344j	/film/film/estimated_budget./measurement_unit/dated_money_value/currency	/m/03p85	0
/m/09gkx35	/film/film/release_date_s./film/film_regional_release_date/film_release_region	/m/01mjq	1
/m/07yw6t	/people/person/places_lived./people/place_lived/location	/m/0bz6sq	0
/m/0f1pyf	/sports/pro_athlete/teams./sports/sports_team_roster/team	/m/02b17f	1
/m/0n1rj	/film/film_set_designer/film_sets_designed	/m/06ls0l	0
/m/02bqn1	/government/legislative_session/members./government/government_position_held/legislative_sessions	/m/02bn_p	1
/m/01s9vc	/award/award_category/winners./award/award_honor/ceremony	/m/03bdm4	0
/m/0dtw1x	/film/film/release_date_s./film/film_regional_release_date/film_release_region	/m/059j2	1
/m/0n1v8	/government/politician/government_positions_held./government/government_position_held/legislative_sessions	/m/0278x6s	0
/m/05pcn59	/award/award_category/nominees./award/award_nomination/nominated_for	/m/0hwpz	1
/m/07yw6t	/sports/sports_team/roster./basketball/basketball_roster_position/position	/m/0mkdm	0
/m/02ywwy	/film/film/produced_by	/m/04pqqb	1
/m/02_gzx	/music/performance_role/track_performances./music/track_contribution/role	/m/0cwt70	0
/m/056rgc	/people/person/place_of_birth	/m/02_286	1
/m/09889g	/time/event/instance_of_recurring_event	/m/01s753	0
/m/01v1ln	/award/award_winning_work/awards_won./award/award_honor/award	/m/02g2wv	1
/m/07yk1xz	/film/film/cinematography	/m/03fmfs	0
/m/03cfjg	/award/award_winner/awards_won./award/award_honor/award_winner	/m/01l47f5	1
/m/0cg9f	/people/deceased_person/place_of_burial	/m/0krdk	0
/m/07rlg	/olympics/olympic_sport/athletes./olympics/olympic_athlete_affiliation/country	/m/0345h	1
/m/08hmch	/education/educational_institution/colors	/m/026qnh6	0
/m/03g90h	/film/film/release_date_s./film/film_regional_release_date/film_release_region	/m/0345h	1
/m/04gcd1	/film/actor/film./film/performance/film	/m/06vkl	0
/m/03_8r	/olympics/olympic_sport/athletes./olympics/olympic_athlete_affiliation/country	/m/056vv	1
/m/0fphf3v	/tv/tv_program/languages	/m/02_hj4	0
/m/017s11	/film/film_distributor/films_distributed./film/film_film_distributor_relationship/film	/m/0830vk	1
/m/0k7tq	/film/film/other_crew./film/film_crew_gig/crewmember	/m/01cd7p	0
/m/0bx0l	/film/film/edited_by	/m/027pdrh	1
/m/09g7vfw	/music/artist/contribution./music/recording_contribution/performance_role	/m/016k6x	0
/m/0jsf6	/award/award_nominated_work/award_nominations./award/award_nomination/nominated_for	/m/07g1sm	1
/m/0l339	/people/person/spouse_s./people/marriage/type_of_union	/m/0n5yv	0
/m/01tntf	/education/educational_institution/students_graduates./education/education/major_field_of_study	/m/0fdys	1
/m/0l339	/sports/sports_team/roster./american_football/football_historical_roster_position/position_s	/m/063_t	0
/m/013w7j	/people/person/employment_history./business/employment_tenure/company	/m/01fb6d	1
/m/01t_wfl	/american_football/football_team/current_roster./sports/sports_team_roster/position	/m/06bss	0
/m/0bs8s1p	/film/film/genre	/m/01jfsb	1
/m/03xl77	/sports/sports_league/teams./sports/sports_league_participation/team	/m/06qw_	0
/m/02kv5k	/people/person/place_of_birth	/m/01_d4	1
/m/06rny	/education/field_of_study/students_majoring./education/education/student	/m/01g0jn	0
/m/0mz73	/award/award_nominee/award_nominations./award/award_nomination/award	/m/05pcn59	1
/m/0h_9252	/film/film/edited_by	/m/0g_bh	0
/m/04088s0	/sports/sports_team/colors	/m/083jv	1
/m/0cbgl	/sports/sports_team/roster./basketball/basketball_roster_position/position	/m/016z9n	0
/m/06wm0z	/base/popstra/celebrity/friendship./base/popstra/friendship/participant	/m/01cwkq	1
/m/0cc63l	/olympics/olympic_sport/athletes./olympics/olympic_athlete_affiliation/country	/m/027s39y	0
/m/04jn6y7	/film/film/production_companies	/m/0fvppk	1
/m/01m4yn	/sports/sports_league_draft/picks./sports/sports_league_draft_pick/school	/m/026kqs9	0
/m/015p3p	/film/actor/film./film/performance/film	/m/067ghz	1
/m/03n6r	/film/film/distributors./film/film_film_distributor_relationship/film_distribution_medium	/m/05x8n	0
/m/01x6v6	/award/award_nominee/award_nominations./award/award_nomination/nominated_for	/m/0c0zq	1
/m/0krdk	/sports/sports_team/roster./american_football/football_roster_position/position	/m/0f2sq	0
/m/0cg9f	/film/actor/film./film/performance/film	/m/026fs38	1
/m/0621cs	/base/culturalevent/event/entity_involved	/m/0dhdp	0
/m/09krm_	/organization/organization/headquarters./location/mailing_address/citytown	/m/0f2nf	1
/m/016vn3	/award/award_nominated_work/award_nominations./award/award_nomination/nominated_for	/m/0294zg	0
/m/0f04v	/travel/travel_destination/climate./travel/travel_destination_monthly_climate/month	/m/040fb	1
/m/02vcp0	/base/schemastaging/organization_extra/phone_number./base/schemastaging/phone_sandbox/contact_category	/m/05gml8	0
/m/02ndbd	/award/award_nominee/award_nominations./award/award_nomination/nominated_for	/m/0fphf3v	1
/m/01j7pt	/sports/sports_league_draft/picks./sports/sports_league_draft_pick/school	/m/02z13jg	0
/m/03g90h	/film/film/release_date_s./film/film_regional_release_date/film_release_region	/m/06t8v	1
/m/0j1z8	/sports/professional_sports_team/draft_picks./sports/sports_league_draft_pick/draft	/m/040rmy	0
/m/01rdm0	/location/country/capital	/m/096gm	1
/m/03n6r	/government/political_party/politicians_in_this_party./government/political_party_tenure/politician	/m/0249kn	0
/m/043tvp3	/film/film/other_crew./film/film_crew_gig/film_crew_role	/m/094hwz	1
/m/012vd6	/people/profession/specialization_of	/m/06qw_	0
/m/027kp3	/education/educational_institution/colors	/m/04mkbj	1
/m/09889g	/music/record_label/artist	/m/02tr7d	0
/m/04crrxr	/award/award_nominee/award_nominations./award/award_nomination/award_nominee	/m/0bz5v2	1
/m/012dtf	/olympics/olympic_sport/athletes./olympics/olympic_athlete_affiliation/country	/m/01j5sv	0
/m/03r8v_	/award/award_category/winners./award/award_honor/award_winner	/m/02ctyy	1
/m/02ctyy	/location/country/capital	/m/07yk1xz	0
/m/01vw8mh	/award/award_nominee/award_nominations./award/award_nomination/award_nominee	/m/0412f5y	1
/m/074qgb	/award/award_ceremony/awards_presented./award/award_honor/honored_for	/m/01s9vc	0
/m/04192r	/business/job_title/people_with_this_title./business/employment_tenure/company	/m/0py9b	1
/m/05kwx2	/film/film/written_by	/m/0jjy0	0
/m/0mmpm	/location/location/adjoin_s./location/adjoining_relationship/adjoins	/m/0mmpz	1
/m/0ght2	/education/educational_institution/colors	/m/03nyts	0
/m/02tk74	/people/person/spouse_s./people/marriage/spouse	/m/0h5g_	1
/m/0k57l	/film/film/executive_produced_by	/m/024lt6	0
/m/064t9	/music/genre/artists	/m/01vrt_c	1
/m/027s39y	/location/us_county/county_seat	/m/0k9p4	0
/m/01yg9y	/award/award_winner/awards_won./award/award_honor/award_winner	/m/06jw0s	1
/m/07w6r	/music/artist/track_contributions./music/track_contribution/role	/m/01fsv9	0
/m/0b68vs	/music/artist/track_contributions./music/track_contribution/role	/m/042v_gx	1
/m/0fzm0g	/education/educational_degree/people_with_this_degree./education/education/institution	/m/0p07_	0
/m/026670	/award/award_nominee/award_nominations./award/award_nomination/nominated_for	/m/02b6n9	1
/m/04jwly	/olympics/olympic_sport/athletes./olympics/olympic_athlete_affiliation/olympics	/m/033hqf	0
/m/042fk	/government/politician/government_positions_held./government/government_position_held/legislative_sessions	/m/01gtcc	1
/m/06s6l	/base/schemastaging/person_extra/net_worth./measurement_unit/dated_money_value/currency	/m/03cffvv	0
/m/07663r	/people/person/profession	/m/018gz8	1
/m/04jwly	/film/film/edited_by	/m/06ls0l	0
/m/02t8gf	/music/genre/parent_genre	/m/0mmp3	1
/m/014vk4	/organization/organization/place_founded	/m/014vk4	0
/m/07c52	/media_common/netflix_genre/titles	/m/08bytj	1
/m/02t1cp	/sports/sports_team_location/teams	/m/0gvvm6l	0
/m/0kz10	/music/genre/parent_genre	/m/0mmp3	1
/m/01fsv9	/music/instrument/family	/m/05ff6	0
/m/02_h0	/film/film_subject/films	/m/095zlp	1
/m/01s9vc	/organization/organization/headquarters./location/mailing_address/state_province_region	/m/01cwkq	0
/m/069q4f	/award/award_winning_work/awards_won./award/award_honor/award	/m/05b4l5x	1
/m/02h3d1	/organization/organization/place_founded	/m/03f5vvx	0
/m/05kwx2	/film/actor/film./film/performance/film	/m/04k9y6	1
/m/01fb6d	/film/film_distributor/films_distributed./film/film_film_distributor_relationship/film	/m/01wbgdv	0
/m/016ndm	/education/educational_institution/colors	/m/083jv	1
/m/03n6r	/base/schemastaging/organization_extra/phone_number./base/schemastaging/phone_sandbox/contact_category	/m/0c031k6	0
/m/02qcr	/film/film/genre	/m/0glj9q	1
/m/02yv_b	/organization/endowed_organization/endowment./measurement_unit/dated_money_value/currency	/m/02ngbs	0
/m/0b9dmk	/people/person/profession	/m/02jknp	1
/m/04sntd	/people/person/spouse_s./people/marriage/location_of_ceremony	/m/05nlx4	0
/m/027j79k	/people/person/places_lived./people/place_lived/location	/m/01x73	1
/m/02vx4	/base/popstra/celebrity/dated./base/popstra/dated/participant	/m/0l2yf	0
/m/0fpv_3_	/film/film/release_date_s./film/film_regional_release_date/film_release_region	/m/03ryn	1
/m/04pqqb	/influence/influence_node/peers./influence/peer_relationship/peers	/m/03mv0b	0
/m/013q0p	/film/film/genre	/m/02kdv5l	1
/m/0hcr	/film/film/production_companies	/m/015wc0	0
/m/03tn80	/film/film/genre	/m/01jfsb	1
/m/04z4j2	/government/legislative_session/members./government/government_position_held/district_represented	/m/04mrfv	0
/m/0bkf4	/award/award_nominee/award_nominations./award/award_nomination/award_nominee	/m/015mrk	1
/m/07y0n	/people/deceased_person/place_of_burial	/m/016z9n	0
/m/0bdw1g	/award/award_category/nominees./award/award_nomination/nominated_for	/m/01j67j	1
/m/03hbzj	/base/schemastaging/organization_extra/phone_number./base/schemastaging/phone_sandbox/service_language	/m/03r8tl	0
/m/016zdd	/people/person/place_of_birth	/m/02_286	1
/m/027nb	/music/record_label/artist	/m/01gtcc	0
/m/07ghq	/award/award_winning_work/awards_won./award/award_honor/award_winner	/m/03_gd	1
/m/0h1yf	/medicine/disease/risk_factors	/m/02zccd	0
/m/01rtm4	/education/educational_institution/students_graduates./education/education/student	/m/05xpms	1
/m/01w20rx	/time/event/instance_of_recurring_event	/m/05ff6	0
/m/02qcr	/film/film/genre	/m/02js9	1
/m/05xvj	/base/biblioness/bibs_location/country	/m/05x8n	0
/m/0dzlbx	/film/film/executive_produced_by	/m/01twdk	1
/m/09fb5	/film/film/runtime./film/film_cut/film_release_region	/m/0249kn	0
/m/07r1_	/music/artist/origin	/m/01_d4	1
/m/04xvlr	/film/film/other_crew./film/film_crew_gig/crewmember	/m/02xlf	0
/m/064lsn	/film/film/release_date_s./film/film_regional_release_date/film_release_region	/m/03_3d	1
/m/059j2	/base/popstra/location/vacationers./base/popstra/vacation_choice/vacationer	/m/0l339	0
/m/01cf5	/education/educational_institution/students_graduates./education/education/major_field_of_study	/m/0fdys	1
/m/01t_wfl	/tv/tv_personality/tv_regular_appearances./tv/tv_regular_personal_appearance/program	/m/01t_wfl	0
/m/0dvld	/award/award_nominee/award_nominations./award/award_nomination/award	/m/05pcn59	1
/m/0jsf6	/people/deceased_person/place_of_death	/m/01j7pt	0
/m/01kv4mb	/award/award_winner/awards_won./award/award_honor/award_winner	/m/0bhvtc	1
/m/0dhdp	/base/popstra/celebrity/dated./base/popstra/dated/participant	/m/077yk0	0
/m/013knm	/award/award_winner/awards_won./award/award_honor/award_winner	/m/02__7n	1
/m/0d34_	/base/saturdaynightlive/snl_cast_member/seasons./base/saturdaynightlive/snl_season_tenure/cast_members	/m/05j0wc	0
/m/05fm6m	/film/film/production_companies	/m/017s11	1
/m/01fsv9	/base/marchmadness/ncaa_basketball_tournament/seeds./base/marchmadness/ncaa_tournament_seed/team	/m/02xb2bt	0
/m/0ds3t5x	/award/award_winning_work/awards_won./award/award_honor/award	/m/02ppm4q	1
/m/01wbgdv	/tv/tv_writer/tv_programs./tv/tv_program_writer_relationship/tv_program	/m/0164v	0
/m/03cbtlj	/award/award_winner/awards_won./award/award_honor/award_winner	/m/04x4s2	1
/m/0k0q73t	/government/government_office_category/officeholders./government/government_position_held/jurisdiction_of_office	/m/06wm0z	0
/m/02n9nmz	/award/award_category/nominees./award/award_nomination/nominated_for	/m/04cj79	1
/m/03khn	/influence/influence_node/peers./influence/peer_relationship/peers	/m/01s9vc	0
/m/0ffgh	/base/popstra/celebrity/friendship./base/popstra/friendship/participant	/m/02lkcc	1
/m/02rqwhl	/sports/professional_sports_team/draft_picks./sports/sports_league_draft_pick/draft	/m/03r8tl	0
/m/02hsq3m	/award/award_category/nominees./award/award_nomination/nominated_for	/m/0hwpz	1
/m/027s39y	/sports/sports_team/roster./american_football/football_roster_position/position	/m/013zs9	0
/m/04w_7	/base/localfood/seasonal_month/produce_available./base/localfood/produce_availability/seasonal_months	/m/06vkl	1
/m/03lgg	/location/location/contains	/m/06xkst	0
/m/0fbtbt	/award/award_category/nominees./award/award_nomination/nominated_for	/m/02rcwq0	1
/m/0n3g	/olympics/olympic_games/sports	/m/02zs4	0
/m/04mz10g	/award/award_nominee/award_nominations./award/award_nomination/award_nominee	/m/05wqr1	1
/m/039yzs	/location/location/adjoin_s./location/adjoining_relationship/adjoins	/m/03mv0b	0
/m/0hn6d	/ice_hockey/hockey_team/current_roster./sports/sports_team_roster/position	/m/02qvzf	1
/m/04gr35	/education/university/local_tuition./measurement_unit/dated_money_value/currency	/m/0g5qmbz	0
/m/0f3m1	/film/film/distributors./film/film_film_distributor_relationship/film_distribution_medium	/m/029j_	1
/m/0fphf3v	/sports/sports_league_draft/picks./sports/sports_league_draft_pick/school	/m/08hmch	0
/m/01kv4mb	/award/award_winner/awards_won./award/award_honor/award_winner	/m/02fn5r	1
/m/01ty7ll	/film/film/executive_produced_by	/m/0892sx	0
/m/057xs89	/award/award_category/nominees./award/award_nomination/nominated_for	/m/013q0p	1
/m/04pqqb	/organization/organization/headquarters./location/mailing_address/citytown	/m/0n1rj	0
/m/0309jm	/people/person/profession	/m/018gz8	1
/m/03n6r	/film/film/estimated_budget./measurement_unit/dated_money_value/currency	/m/03s0w	0
/m/01cky2	/award/award_category/winners./award/award_honor/award_winner	/m/04xrx	1
/m/0bzn6_	/organization/organization/child./organization/organization_relationship/child	/m/0k0q73t	0
/m/02h3d1	/award/award_category/winners./award/award_honor/award_winner	/m/0k7pf	1
/m/01cwcr	/film/film/film_art_direction_by	/m/01cwcr	0
/m/02jxbw	/film/film/genre	/m/02kdv5l	1
/m/0jsf6	/award/award_nominated_work/award_nominations./award/award_nomination/nominated_for	/m/0621cs	0
/m/05glrg	/sports/sports_team/sport	/m/02vx4	1
/m/012vd6	/ice_hockey/hockey_team/current_roster./sports/sports_team_roster/position	/m/013q0p	0
/m/025txtg	/sports/sports_team/sport	/m/02vx4	1
/m/0n1v8	/sports/sports_team/roster./basketball/basketball_roster_position/position	/m/0621cs	0
/m/0c4f4	/people/person/spouse_s./people/marriage/spouse	/m/0sw6g	1
/m/01my95	/base/localfood/seasonal_month/produce_available./base/localfood/produce_availability/seasonal_months	/m/03s0w	0
/m/07_l6	/music/performance_role/regular_performances./music/group_membership/role	/m/05r5c	1
/m/01q8hj	/people/marriage_union_type/unions_of_this_type./people/marriage/location_of_ceremony	/m/0d34_	0
/m/0gd5z	/people/person/gender	/m/02zsn	1
/m/04gr35	/education/educational_degree/people_with_this_degree./education/education/student	/m/04205z	0
/m/05bnp0	/film/actor/film./film/performance/film	/m/012s1d	1
/m/0h3c3g	/people/person/place_of_birth	/m/06rny	0
/m/02mqc4	/award/award_nominee/award_nominations./award/award_nomination/award_nominee	/m/047c9l	1
/m/01twdk	/film/film/cinematography	/m/0173s9	0
/m/01gzm2	/people/person/profession	/m/02jknp	1
/m/0837ql	/music/performance_role/regular_performances./music/group_membership/role	/m/04jn6y7	0
/m/024lt6	/film/film/release_date_s./film/film_regional_release_date/film_release_distribution_medium	/m/029j_	1
/m/07k2x	/people/marriage_union_type/unions_of_this_type./people/marriage/location_of_ceremony	/m/01wbgdv	0
/m/07gql	/music/performance_role/regular_performances./music/group_membership/group	/m/0163m1	1
/m/03d6fyn	/people/person/sibling_s./people/sibling_relationship/sibling	/m/03bdm4	0
/m/06l22	/sports/sports_team/colors	/m/083jv	1
/m/0fzm0g	/music/group_member/membership./music/group_membership/group	/m/03n0cd	0
/m/06nrt	/location/location/adjoin_s./location/adjoining_relationship/adjoins	/m/04s7y	1
/m/012x03	/celebrities/celebrity/celebrity_friends./celebrities/friendship/friend	/m/02_n3z	0
/m/049mql	/film/film/country	/m/059j2	1
/m/02z13jg	/olympics/olympic_sport/athletes./olympics/olympic_athlete_affiliation/country	/m/02tr7d	0
/m/09rvwmy	/film/film/other_crew./film/film_crew_gig/film_crew_role	/m/02vs3x5	1
/m/04q42	/government/legislative_session/members./government/government_position_held/legislative_sessions	/m/0163m1	0
/m/0jsf6	/film/film/prequel	/m/07g1sm	1
/m/0cc63l	/celebrities/celebrity/celebrity_friends./celebrities/friendship/friend	/m/02zrv7	0
/m/0g9zcgx	/award/award_nominee/award_nominations./award/award_nomination/award_nominee	/m/0cw67g	1
/m/02xlf	/education/educational_degree/people_with_this_degree./education/education/student	/m/01gtbb	0
/m/04j_gs	/award/award_nominee/award_nominations./award/award_nomination/award_nominee	/m/03f0r5w	1
/m/06rny	/government/legislative_session/members./government/government_position_held/district_represented	/m/01l1rw	0
/m/0214km	/music/performance_role/track_performances./music/track_contribution/role	/m/026t6	1
/m/01wyy_	/business/business_operation/industry	/m/069ld1	0
/m/01pkhw	/film/actor/film./film/performance/film	/m/02vqsll	1
/m/060s9	/sports/pro_athlete/teams./sports/sports_team_roster/team	/m/0j871	0
/m/01qgr3	/education/educational_institution/students_graduates./education/education/major_field_of_study	/m/0_jm	1
/m/02h3d1	/film/film/edited_by	/m/0j1z8	0
/m/02rzdcp	/award/award_winning_work/awards_won./award/award_honor/award_winner	/m/04gnbv1	1
/m/02yv6b	/american_football/football_team/current_roster./sports/sports_team_roster/position	/m/02xlf	0
/m/05b1610	/award/award_category/nominees./award/award_nomination/nominated_for	/m/0cn_b8	1
/m/01fb6d	/media_common/netflix_genre/titles	/m/0dzlk	0
/m/01dpts	/award/award_nominee/award_nominations./award/award_nomination/award	/m/02x4wb	1
/m/074qgb	/soccer/football_player/current_team./sports/sports_team_roster/team	/m/0p07_	0
/m/05xvj	/sports/professional_sports_team/draft_picks./sports/sports_league_draft_pick/draft	/m/02z6872	1
/m/01t21q	/user/ktrueman/default_domain/international_organization/member_states	/m/0bx0lc	0
/m/0qm98	/film/film/release_date_s./film/film_regional_release_date/film_release_distribution_medium	/m/029j_	1
/m/0kb3n	/music/instrument/instrumentalists	/m/0n1rj	0
/m/05xpms	/award/award_nominee/award_nominations./award/award_nomination/award_nominee	/m/0cnl09	1
/m/0gpx6	/baseball/baseball_team/team_stats./baseball/baseball_team_stats/season	/m/03p85	0
/m/05szp	/award/award_nominee/award_nominations./award/award_nomination/award_nominee	/m/01my_c	1
/m/059gkk	/people/person/sibling_s./people/sibling_relationship/sibling	/m/0278x6s	0
/m/0c0k1	/base/popstra/celebrity/dated./base/popstra/dated/participant	/m/01k8rb	1
/m/01j7pt	/location/administrative_division/country	/m/011w20	0
/m/03kxj2	/film/film/genre	/m/01hmnh	1
/m/03_3d	/film/film/produced_by	/m/06m6p7	0
/m/07y9w5	/film/film/production_companies	/m/017s11	1
/m/0234j5	/celebrities/celebrity/sexual_relationships./celebrities/romantic_relationship/celebrity	/m/03hbzj	0
/m/0zjpz	/music/artist/track_contributions./music/track_contribution/role	/m/0214km	1
/m/02js9	/people/person/gender	/m/05ff6	0
/m/0bdx29	/award/award_category/nominees./award/award_nomination/nominated_for	/m/0kfv9	1
/m/02_hj4	/base/petbreeds/city_with_dogs/top_breeds./base/petbreeds/dog_city_relationship/dog_breed	/m/02tr7d	0
/m/01tnxc	/award/award_nominee/award_nominations./award/award_nomination/award_nominee	/m/07h565	1
/m/0294mx	/tv/tv_program/languages	/m/05g56	0
/m/04p0c	/base/aareas/schema/administrative_area/administrative_parent	/m/0345h	1
/m/01445t	/music/performance_role/track_performances./music/track_contribution/role	/m/06j8wx	0
/m/042v_gx	/music/performance_role/track_performances./music/track_contribution/role	/m/0dwvl	1
/m/01grpq	/base/saturdaynightlive/snl_cast_member/seasons./base/saturdaynightlive/snl_season_tenure/cast_members	/m/04jn6y7	0
/m/012s5j	/award/award_nominee/award_nominations./award/award_nomination/award	/m/05b4l5x	1
/m/0n5yv	/base/schemastaging/organization_extra/phone_number./base/schemastaging/phone_sandbox/contact_category	/m/063_t	0
/m/019vv1	/education/educational_institution/school_type	/m/01jlsn	1
/m/01g23m	/tv/tv_program/genre	/m/02js9	0
/m/02fn5r	/award/award_nominated_work/award_nominations./award/award_nomination/nominated_for	/m/0pmw9	1
/m/01yznp	/location/country/form_of_government	/m/0f2sq	0
/m/014bpd	/award/award_winning_work/awards_won./award/award_honor/award	/m/02qwdhq	1
/m/0294zg	/people/person/spouse_s./people/marriage/type_of_union	/m/03zv9	0
/m/01x2tm8	/award/award_nominee/award_nominations./award/award_nomination/award	/m/03r8tl	1
/m/01bpc9	/film/film_distributor/films_distributed./film/film_film_distributor_relationship/film	/m/0k9ts	0
/m/0gqng	/award/award_category/winners./award/award_honor/ceremony	/m/0fk0xk	1
/m/0k0q73t	/baseball/baseball_team/team_stats./baseball/baseball_team_stats/season	/m/01vs14j	0
/m/026n998	/award/award_nominee/award_nominations./award/award_nomination/award_nominee	/m/0265vcb	1
/m/03lgg	/award/award_winning_work/awards_won./award/award_honor/award	/m/0n3g	0
/m/0270k40	/film/film/genre	/m/01hmnh	1
/m/039yzs	/film/film/other_crew./film/film_crew_gig/crewmember	/m/067nv	0
/m/0bwfn	/education/educational_institution/students_graduates./education/education/student	/m/01n9d9	1
/m/026g801	/sports/sports_position/players./sports/sports_team_roster/team	/m/01445t	0
/m/064t9	/music/genre/parent_genre	/m/0ggq0m	1
/m/04_tv	/people/deceased_person/place_of_burial	/m/05wdgq	0
/m/0gd0c7x	/film/film/release_date_s./film/film_regional_release_date/film_release_region	/m/0d0kn	1
/m/02_gzx	/award/award_category/disciplines_or_subjects	/m/0cg9f	0
/m/08hmch	/film/film/release_date_s./film/film_regional_release_date/film_release_region	/m/03h64	1
/m/012f86	/american_football/football_team/current_roster./sports/sports_team_roster/position	/m/04f6df0	0
/m/0pz7h	/base/popstra/celebrity/dated./base/popstra/dated/participant	/m/026w_gk	1
/m/0137n0	/music/genre/artists	/m/0qm8b	0
/m/02fcs2	/people/person/profession	/m/02jknp	1
/m/014pg1	/base/saturdaynightlive/snl_cast_member/seasons./base/saturdaynightlive/snl_season_tenure/cast_members	/m/0dhdp	0
/m/0k7pf	/award/award_nominee/award_nominations./award/award_nomination/award	/m/02h3d1	1
/m/01vl17	/time/event/locations	/m/040rmy	0
/m/04q42	/base/biblioness/bibs_location/country	/m/059j2	1
/m/0222qb	/military/military_combatant/military_conflicts./military/military_combatant_group/combatants	/m/01jc6q	0
/m/0gqzz	/award/award_category/nominees./award/award_nomination/nominated_for	/m/03x7hd	1
/m/0drc1	/award/award_ceremony/awards_presented./award/award_honor/award_winner	/m/03xl77	0
/m/0dzlbx	/film/film/release_date_s./film/film_regional_release_date/film_release_region	/m/07t21	1
/m/0mw93	/media_common/netflix_genre/titles	/m/0g4c1t	0
/m/04mkft	/film/film_distributor/films_distributed./film/film_film_distributor_relationship/film	/m/01f8f7	1
/m/0c4f4	/education/educational_institution/students_graduates./education/education/major_field_of_study	/m/0cbgl	0
/m/013w7j	/base/popstra/celebrity/friendship./base/popstra/friendship/participant	/m/0456xp	1
/m/02tr7d	/sports/sports_team/roster./baseball/baseball_roster_position/position	/m/03hbzj	0
/m/0gjcrrw	/film/film/release_date_s./film/film_regional_release_date/film_release_region	/m/0d060g	1
/m/04zjxcz	/education/educational_institution/school_type	/m/05ll37	0
/m/0d1w9	/film/film_subject/films	/m/0_b3d	1
/m/04999m	/base/locations/continents/countries_within	/m/0fphf3v	0
/m/05ty4m	/film/actor/film./film/performance/film	/m/034qzw	1
/m/02xlf	/people/cause_of_death/people	/m/01gq0b	0
/m/03bnv	/award/award_nominee/award_nominations./award/award_nomination/award_nominee	/m/03j24kf	1
/m/05wdgq	/government/politician/government_positions_held./government/government_position_held/legislative_sessions	/m/016vn3	0
/m/0345h	/location/location/adjoin_s./location/adjoining_relationship/adjoins	/m/0k6nt	1
/m/0c4hnm	/government/legislative_session/members./government/government_position_held/district_represented	/m/0j1z8	0
/m/09q17	/media_common/netflix_genre/titles	/m/026mfbr	1
/m/06pvr	/location/capital_of_administrative_division/capital_of./location/administrative_division_capital_relationship/administrative_division	/m/01ty7ll	0
/m/03b78r	/award/award_nominee/award_nominations./award/award_nomination/award_nominee	/m/029_3	1
/m/027kp3	/base/petbreeds/city_with_dogs/top_breeds./base/petbreeds/dog_city_relationship/dog_breed	/m/05xvj	0
/m/043tvp3	/film/film/genre	/m/01jfsb	1
/m/03rz4	/location/country/second_level_divisions	/m/0l178	0
/m/01qnfc	/people/person/profession	/m/01d_h8	1
/m/02tr7d	/award/award_category/winners./award/award_honor/ceremony	/m/013crh	0
/m/03rx9	/people/person/places_lived./people/place_lived/location	/m/0cr3d	1
/m/01t21q	/award/award_winner/awards_won./award/award_honor/award_winner	/m/0dgq_kn	0
/m/0br1w	/people/person/places_lived./people/place_lived/location	/m/071vr	1
/m/0b80__	/music/artist/track_contributions./music/track_contribution/role	/m/026kqs9	0
/m/05xvj	/baseball/baseball_team/team_stats./baseball/baseball_team_stats/season	/m/04110b0	1
/m/06rny	/award/award_category/winners./award/award_honor/award_winner	/m/026n998	0
/m/014zcr	/award/award_nominee/award_nominations./award/award_nomination/award	/m/02x4wr9	1
/m/0mw93	/military/military_combatant/military_conflicts./military/military_combatant_group/combatants	/m/07y0n	0
/m/0bxtg	/award/award_nominee/award_nominations./award/award_nomination/award	/m/0279c15	1
/m/01wyy_	/sports/sports_league_draft/picks./sports/sports_league_draft_pick/school	/m/0bzn6_	0
/m/0k1wz	/people/person/religion	/m/0kpl	1
/m/04328m	/influence/influence_node/peers./influence/peer_relationship/peers	/m/01c9f2	0
/m/0161c2	/people/person/gender	/m/02zsn	1
/m/0163m1	/people/person/spouse_s./people/marriage/type_of_union	/m/05xvj	0
/m/02114t	/base/popstra/celebrity/breakup./base/popstra/breakup/participant	/m/01g0jn	1
/m/02_hj4	/base/popstra/celebrity/canoodled./base/popstra/canoodled/participant	/m/01trxd	0
/m/0fqyc	/location/administrative_division/country	/m/059j2	1
/m/02_hj4	/base/schemastaging/organization_extra/phone_number./base/schemastaging/phone_sandbox/contact_category	/m/0jcx1	0
/m/07bs0	/olympics/olympic_sport/athletes./olympics/olympic_athlete_affiliation/country	/m/07t21	1
/m/01xn6mc	/american_football/football_team/current_roster./sports/sports_team_roster/position	/m/03zrc_	0
/m/03m6t5	/base/americancomedy/celebrity_impressionist/celebrities_impersonated	/m/0cg9f	1
/m/01j7pt	/education/educational_institution/students_graduates./education/education/major_field_of_study	/m/011w20	0
/m/0c9k8	/award/award_winning_work/awards_won./award/award_honor/award_winner	/m/09fb5	1
/m/069ld1	/music/instrument/family	/m/024lt6	0
/m/0c4y8	/people/person/spouse_s./people/marriage/type_of_union	/m/01g63y	1
/m/0fvyg	/education/educational_degree/people_with_this_degree./education/education/student	/m/06wm0z	0
/m/01c99j	/award/award_category/winners./award/award_honor/award_winner	/m/0dzlk	1
/m/04sntd	/film/film/release_date_s./film/film_regional_release_date/film_release_distribution_medium	/m/07fj_	0
/m/014g22	/award/award_nominee/award_nominations./award/award_nomination/nominated_for	/m/0ds3t5x	1
/m/032zg9	/education/university/international_tuition./measurement_unit/dated_money_value/currency	/m/02rlj20	0
/m/0ggq0m	/music/genre/artists	/m/03zrp	1
/m/03n0cd	/education/university/local_tuition./measurement_unit/dated_money_value/currency	/m/0gfmc_	0
/m/0j0k	/base/locations/continents/countries_within	/m/02lx0	1
/m/013q0p	/location/country/official_language	/m/07kdkfj	0
/m/0b9dmk	/award/award_nominee/award_nominations./award/award_nomination/award_nominee	/m/05wqr1	1
/m/01yznp	/base/popstra/celebrity/friendship./base/popstra/friendship/participant	/m/02px_23	0
/m/0151ns	/award/award_nominee/award_nominations./award/award_nomination/award	/m/05b4l5x	1
/m/0163m1	/film/film/runtime./film/film_cut/film_release_region	/m/060s9	0
/m/01vrt_c	/award/award_nominee/award_nominations./award/award_nomination/award_nominee	/m/09hnb	1
/m/0n1v8	/award/award_category/nominees./award/award_nomination/nominated_for	/m/032zg9	0
/m/03r8v_	/award/award_category/winners./award/award_honor/award_winner	/m/06wvfq	1
/m/0vmt	/film/film/dubbing_performances./film/dubbing_performance/actor	/m/06d4h	0
/m/06jw0s	/people/person/gender	/m/02zsn	1
/m/03nyts	/organization/organization/child./organization/organization_relationship/child	/m/0d02km	0
/m/019v9k	/education/educational_degree/people_with_this_degree./education/education/institution	/m/026m3y	1
/m/04vjh	/film/director/film	/m/0drc1	0
/m/03d34x8	/award/award_winning_work/awards_won./award/award_honor/award_winner	/m/03y9ccy	1
/m/03xb2w	/award/award_ceremony/awards_presented./award/award_honor/honored_for	/m/01v27pl	0
/m/01d6g	/baseball/baseball_team/team_stats./baseball/baseball_team_stats/season	/m/03c6sl9	1
/m/04xvlr	/film/film/distributors./film/film_film_distributor_relationship/region	/m/026qnh6	0
/m/0fpv_3_	/film/film/release_date_s./film/film_regional_release_date/film_release_region	/m/01mjq	1
/m/063_t	/olympics/olympic_participating_country/medals_won./olympics/olympic_medal_honor/olympics	/m/05xvj	0
/m/01rxyb	/film/film/release_date_s./film/film_regional_release_date/film_release_distribution_medium	/m/029j_	1
/m/063_t	/tv/tv_program/languages	/m/035zr0	0
/m/011zf2	/award/award_nominee/award_nominations./award/award_nomination/award_nominee	/m/06fmdb	1
/m/03khn	/music/artist/contribution./music/recording_contribution/performance_role	/m/013q0p	0
/m/09pj68	/award/award_ceremony/awards_presented./award/award_honor/award_winner	/m/0697kh	1
/m/03rz4	/people/person/languages	/m/0n1rj	0
/m/0l6wj	/award/award_winner/awards_won./award/award_honor/award_winner	/m/017s11	1
/m/0ch280	/travel/travel_destination/climate./travel/travel_destination_monthly_climate/month	/m/02zccd	0
/m/031778	/award/award_winning_work/awards_won./award/award_honor/honored_for	/m/01flv_	1
/m/0g_bh	/base/popstra/celebrity/dated./base/popstra/dated/participant	/m/07y0n	0
/m/0dln8jk	/film/film/release_date_s./film/film_regional_release_date/film_release_distribution_medium	/m/029j_	1
/m/013zs9	/film/film/other_crew./film/film_crew_gig/film_crew_role	/m/07k2x	0
/m/01grnp	/government/legislative_session/members./government/government_position_held/legislative_sessions	/m/01grp0	1
/m/0dzlk	/people/person/nationality	/m/01lqnff	0
/m/0kb3n	/award/award_nominee/award_nominations./award/award_nomination/nominated_for	/m/0dj0m5	1
/m/0dhdp	/time/event/locations	/m/0294zg	0
/m/04hvw	/organization/organization_member/member_of./organization/organization_membership/organization	/m/041288	1
/m/02w9sd7	/travel/travel_destination/climate./travel/travel_destination_monthly_climate/month	/m/01grpq	0
/m/06gp3f	/people/person/gender	/m/02zsn	1
/m/02n9nmz	/music/artist/contribution./music/recording_contribution/performance_role	/m/07h9gp	0
/m/0kvgtf	/film/film/genre	/m/01hmnh	1
/m/08z39v	/music/artist/origin	/m/01c65z	0
/m/06pvr	/location/location/contains	/m/0135g	1
/m/06j8wx	/government/legislative_session/members./government/government_position_held/district_represented	/m/01c65z	0
/m/03cvv4	/film/actor/film./film/performance/film	/m/0bscw	1
/m/081lh	/award/award_nominee/award_nominations./award/award_nomination/award_nominee	/m/01vl17	0
/m/03r8tl	/award/award_category/winners./award/award_honor/award_winner	/m/021j72	1
/m/0ch280	/people/cause_of_death/people	/m/04sntd	0
/m/04f6hhm	/tv/tv_program/regular_cast./tv/regular_tv_appearance/actor	/m/022yb4	1
/m/0cc63l	/film/film/genre	/m/04999m	0
/m/01v3bn	/people/person/spouse_s./people/marriage/location_of_ceremony	/m/071vr	1
/m/016m5c	/film/film/release_date_s./film/film_regional_release_date/film_release_distribution_medium	/m/0bx0lc	0
/m/01qgry	/music/artist/track_contributions./music/track_contribution/role	/m/05r5c	1
/m/0gpx6	/base/x2010fifaworldcupsouthafrica/world_cup_squad/current_world_cup_squad./base/x2010fifaworldcupsouthafrica/current_world_cup_squad/current_club	/m/03p85	0
/m/017s11	/film/film_distributor/films_distributed./film/film_film_distributor_relationship/film	/m/0p_sc	1
/m/0cxn2	/sports/sports_team/roster./american_football/football_historical_roster_position/position_s	/m/0cg9f	0
/m/026t6	/music/instrument/instrumentalists	/m/020hh3	1
/m/01t21q	/location/country/form_of_government	/m/05kwx2	0
/m/0349s	/language/human_language/countries_spoken_in	/m/01mjq	1
/m/03s0w	/film/film/personal_appearances./film/personal_film_appearance/person	/m/0173s9	0
/m/01jfsb	/media_common/netflix_genre/titles	/m/0fy34l	1
/m/02grdc	/location/hud_county_place/county	/m/0h1yf	0
/m/096f8	/olympics/olympic_sport/athletes./olympics/olympic_athlete_affiliation/country	/m/0d060g	1
/m/0163m1	/tv/tv_program/program_creator	/m/0d34_	0
/m/035bcl	/film/film/other_crew./film/film_crew_gig/film_crew_role	/m/0263ycg	1
/m/012x03	/olympics/olympic_participating_country/medals_won./olympics/olympic_medal_honor/olympics	/m/02pxst	0
/m/02ppm4q	/award/award_category/winners./award/award_honor/award_winner	/m/01fwf1	1
/m/01gtcc	/base/popstra/celebrity/dated./base/popstra/dated/participant	/m/027cyf7	0
/m/0g768	/music/record_label/artist	/m/04k05	1
/m/01yznp	/film/film/other_crew./film/film_crew_gig/crewmember	/m/0h7t36	0
/m/05lfwd	/tv/tv_program/program_creator	/m/06y9bd	1
/m/034zc0	/travel/travel_destination/climate./travel/travel_destination_monthly_climate/month	/m/05t54s	0
/m/04pqqb	/award/award_nominee/award_nominations./award/award_nomination/award_nominee	/m/01tt43d	1
/m/032j_n	/base/petbreeds/city_with_dogs/top_breeds./base/petbreeds/dog_city_relationship/dog_breed	/m/05ff6	0
/m/03cd1q	/award/award_winner/awards_won./award/award_honor/award_winner	/m/01wbgdv	1
/m/06gbnc	/dataworld/gardening_hint/split_to	/m/01f9zw	0
/m/0dq_5	/organization/role/leaders./organization/leadership/organization	/m/0k9ts	1
/m/02zs4	/influence/influence_node/peers./influence/peer_relationship/peers	/m/07wjk	0
/m/012f86	/people/ethnicity/geographic_distribution	/m/07t21	1
/m/0n5yv	/celebrities/celebrity/sexual_relationships./celebrities/romantic_relationship/celebrity	/m/0837ql	0
/m/0p9sw	/award/award_category/winners./award/award_honor/award_winner	/m/021yc7p	1
/m/07wjk	/sports/pro_athlete/teams./sports/sports_team_roster/team	/m/01c65z	0
/m/07s846j	/film/film/release_date_s./film/film_regional_release_date/film_release_region	/m/03h64	1
/m/016m5c	/medicine/symptom/symptom_of	/m/06qw_	0
/m/0cbvg	/film/film_subject/films	/m/020fcn	1
/m/03rz4	/award/award_ceremony/awards_presented./award/award_honor/award_winner	/m/01wbgdv	0
/m/04mhbh	/film/actor/film./film/performance/film	/m/04k9y6	1
/m/09889g	/base/petbreeds/city_with_dogs/top_breeds./base/petbreeds/dog_city_relationship/dog_breed	/m/0fphf3v	0
/m/040rmy	/film/film/language	/m/04h9h	1
/m/02tr7d	/medicine/symptom/symptom_of	/m/02pxst	0
/m/02rb607	/award/award_winning_work/awards_won./award/award_honor/award_winner	/m/041jlr	1
/m/058cm	/celebrities/celebrity/sexual_relationships./celebrities/romantic_relationship/celebrity	/m/0cwt70	0
/m/03t22m	/music/performance_role/regular_performances./music/group_membership/role	/m/07gql	1
/m/0b5x23	/film/film/costume_design_by	/m/03p85	0
/m/09y20	/people/person/spouse_s./people/marriage/type_of_union	/m/01g63y	1
/m/05b2gsm	/sports/sports_league_draft/picks./sports/sports_league_draft_pick/school	/m/0dhd5	0
/m/056wb	/award/award_nominee/award_nominations./award/award_nomination/award_nominee	/m/03wbzp	1
/m/03s0w	/award/award_category/winners./award/award_honor/award_winner	/m/02ctyy	0
/m/0cgzj	/award/award_nominee/award_nominations./award/award_nomination/award	/m/02grdc	1
/m/0n1v8	/location/country/form_of_government	/m/0g4c1t	0
/m/025n3p	/award/award_nominee/award_nominations./award/award_nomination/award_nominee	/m/078mgh	1
/m/03f5vvx	/education/educational_institution/colors	/m/03fmfs	0
/m/0137g1	/people/person/spouse_s./people/marriage/type_of_union	/m/01g63y	1
/m/0cv1h	/education/university/international_tuition./measurement_unit/dated_money_value/currency	/m/0892sx	0
/m/036px	/people/person/place_of_birth	/m/013kcv	1
/m/09889g	/baseball/baseball_team/team_stats./baseball/baseball_team_stats/season	/m/02ngbs	0
/m/0ddfwj1	/film/film/release_date_s./film/film_regional_release_date/film_release_region	/m/0d060g	1
/m/02yv_b	/film/film/dubbing_performances./film/dubbing_performance/actor	/m/03r8tl	0
/m/015q1n	/education/educational_institution/students_graduates./education/education/major_field_of_study	/m/01mkq	1
/m/0294zg	/dataworld/gardening_hint/split_to	/m/04jn6y7	0
/m/01vxxb	/award/award_nominee/award_nominations./award/award_nomination/award_nominee	/m/0dvld	1
/m/0dj0m5	/film/film/story_by	/m/06__m6	0
/m/026c1	/award/award_nominee/award_nominations./award/award_nomination/award	/m/05b4l5x	1
/m/04l57x	/music/record_label/artist	/m/0jmk7	0
/m/02ctyy	/award/award_nominee/award_nominations./award/award_nomination/award	/m/03r8v_	1
/m/092kgw	/film/film/other_crew./film/film_crew_gig/crewmember	/m/0173s9	0
/m/0308kx	/award/award_nominee/award_nominations./award/award_nomination/award_nominee	/m/058ncz	1
/m/09kr66	/people/deceased_person/place_of_death	/m/02h3d1	0
/m/02x4sn8	/award/award_category/nominees./award/award_nomination/nominated_for	/m/0bmhvpr	1
/m/0cc63l	/film/film/music	/m/0l178	0
/m/014zcr	/film/actor/film./film/performance/film	/m/0bmhvpr	1
/m/07h76	/base/biblioness/bibs_location/country	/m/01twdk	0
/m/03s0w	/location/location/contains	/m/02j3w	1
/m/0b80__	/sports/sport/pro_athletes./sports/pro_sports_played/athlete	/m/015wc0	0
/m/05bnp0	/award/award_nominee/award_nominations./award/award_nomination/award	/m/04ljl_l	1
/m/026g801	/location/statistical_region/places_exported_to./location/imports_and_exports/exported_to	/m/01c99j	0
/m/01k8rb	/people/person/place_of_birth	/m/02d6c	1
/m/04344j	/base/localfood/seasonal_month/produce_available./base/localfood/produce_availability/seasonal_months	/m/02_gzx	0
/m/064t9	/music/genre/artists	/m/01vwbts	1
/m/0qm8b	/sports/sports_position/players./sports/sports_team_roster/team	/m/04jn6y7	0
/m/01vsn38	/people/person/profession	/m/01d_h8	1
/m/02zrv7	/influence/influence_node/peers./influence/peer_relationship/peers	/m/04xvlr	0
/m/02mxbd	/people/person/profession	/m/026sdt1	1
/m/0cbgl	/location/hud_county_place/county	/m/07yk1xz	0
/m/05c1t6z	/award/award_ceremony/awards_presented./award/award_honor/honored_for	/m/04xbq3	1
/m/04x4s2	/government/politician/government_positions_held./government/government_position_held/basic_title	/m/01t21q	0
/m/0c4f4	/film/actor/film./film/performance/film	/m/011yn5	1
/m/039yzs	/sports/sports_team/roster./basketball/basketball_roster_position/position	/m/0285m87	0
/m/0ddj0x	/film/film/release_date_s./film/film_regional_release_date/film_release_region	/m/03_3d	1
/m/02tr7d	/award/award_winning_work/awards_won./award/award_honor/award	/m/02ngbs	0
/m/07gyv	/olympics/olympic_sport/athletes./olympics/olympic_athlete_affiliation/country	/m/07t_x	1
/m/03zrc_	/film/film/executive_produced_by	/m/01xn6mc	0
/m/026spg	/film/actor/film./film/performance/film	/m/03hfmm	1
/m/02ngbs	/tv/tv_personality/tv_regular_appearances./tv/tv_regular_personal_appearance/program	/m/02zrv7	0
/m/04cv9m	/film/film/country	/m/0345h	1
/m/0bwfn	/film/film/executive_produced_by	/m/013_vh	0
/m/028r4y	/award/award_winner/awards_won./award/award_honor/award_winner	/m/01tnxc	1
/m/07h9gp	/base/americancomedy/celebrity_impressionist/celebrities_impersonated	/m/04sntd	0
/m/0bwfn	/education/educational_institution/students_graduates./education/education/student	/m/01wjrn	1
/m/026ps1	/people/person/gender	/m/03d6fyn	0
/m/0bwfn	/education/educational_institution/students_graduates./education/education/student	/m/016732	1
/m/0g5qmbz	/organization/organization_member/member_of./organization/organization_membership/organization	/m/0164v	0
/m/03b_fm5	/film/film/country	/m/0345h	1
/m/02xlf	/base/biblioness/bibs_location/country	/m/026n998	0
/m/02f4s3	/education/educational_institution/students_graduates./education/education/major_field_of_study	/m/01mkq	1
/m/04l57x	/celebrities/celebrity/celebrity_friends./celebrities/friendship/friend	/m/0249kn	0
/m/029jt9	/film/film/release_date_s./film/film_regional_release_date/film_release_distribution_medium	/m/029j_	1
/m/01grpq	/location/capital_of_administrative_division/capital_of./location/administrative_division_capital_relationship/administrative_division	/m/02tr7d	0
/m/031778	/film/film/release_date_s./film/film_regional_release_date/film_release_distribution_medium	/m/029j_	1
/m/02_hj4	/film/film_distributor/films_distributed./film/film_film_distributor_relationship/film	/m/027s39y	0
/m/028n3	/base/aareas/schema/administrative_area/capital	/m/02m__	1
/m/0g_bh	/film/film/runtime./film/film_cut/film_release_region	/m/02ltg3	0
/m/06tp4h	/people/person/profession	/m/01xr66	1
/m/039yzs	/food/food/nutrients./food/nutrition_fact/nutrient	/m/02yv_b	0
/m/0pmpl	/base/biblioness/bibs_location/country	/m/0d060g	1
/m/08hmch	/government/politician/government_positions_held./government/government_position_held/legislative_sessions	/m/039yzs	0
/m/034qmv	/film/film/executive_produced_by	/m/012d40	1
/m/02xlf	/award/award_nominee/award_nominations./award/award_nomination/nominated_for	/m/0285m87	0
/m/09lcsj	/film/film/genre	/m/04xvlr	1
/m/04gr35	/base/popstra/celebrity/friendship./base/popstra/friendship/participant	/m/05ll37	0
/m/01grr2	/government/legislative_session/members./government/government_position_held/legislative_sessions	/m/01grp0	1
/m/0m32h	/film/film/produced_by	/m/0flsf	0
/m/05r6t	/music/genre/artists	/m/03xl77	1
/m/06qw_	/influence/influence_node/peers./influence/peer_relationship/peers	/m/07h9gp	0
/m/07gbf	/tv/tv_program/regular_cast./tv/regular_tv_appearance/actor	/m/01k8rb	1
/m/06qw_	/sports/sports_team_location/teams	/m/0ch280	0
/m/05qdh	/education/field_of_study/students_majoring./education/education/student	/m/0gs1_	1
/m/0dzlk	/government/legislative_session/members./government/government_position_held/legislative_sessions	/m/016k6x	0
/m/07bdd_	/award/award_category/nominees./award/award_nomination/nominated_for	/m/074rg9	1
/m/01c99j	/film/film_subject/films	/m/06bss	0
/m/07m77x	/award/award_nominee/award_nominations./award/award_nomination/award_nominee	/m/05ztm4r	1
/m/029h7y	/education/educational_institution/students_graduates./education/education/major_field_of_study	/m/0b66qd	0
/m/01ky2h	/people/person/place_of_birth	/m/02_286	1
/m/09889g	/education/educational_degree/people_with_this_degree./education/education/institution	/m/03r8tl	0
/m/0kfv9	/award/award_winning_work/awards_won./award/award_honor/award_winner	/m/04x4s2	1
/m/06ls0l	/sports/sports_team/roster./american_football/football_historical_roster_position/position_s	/m/0l178	0
/m/05b1610	/award/award_category/nominees./award/award_nomination/nominated_for	/m/09y6pb	1
/m/0cwt70	/sports/sports_league/teams./sports/sports_league_participation/team	/m/01gtcc	0
/m/0xv2x	/music/genre/artists	/m/016lmg	1
/m/03rz4	/ice_hockey/hockey_team/current_roster./sports/sports_team_roster/position	/m/01c0cc	0
/m/0ggq0m	/music/genre/artists	/m/0k7pf	1
/m/02_hj4	/people/marriage_union_type/unions_of_this_type./people/marriage/location_of_ceremony	/m/02xb2bt	0
/m/0l6px	/award/award_winner/awards_won./award/award_honor/award_winner	/m/01hkhq	1
/m/02rrh1w	/award/award_nominee/award_nominations./award/award_nomination/award	/m/074qgb	0
/m/015d3h	/film/actor/film./film/performance/film	/m/0bscw	1
/m/09889g	/music/instrument/family	/m/01gtbb	0
/m/0721cy	/award/award_nominee/award_nominations./award/award_nomination/award	/m/0fc9js	1
/m/01cd7p	/people/person/profession	/m/07c52	0
/m/0f6c3	/government/government_office_category/officeholders./government/government_position_held/jurisdiction_of_office	/m/03s0w	1
/m/01gtbb	/base/biblioness/bibs_location/state	/m/0g5qmbz	0
/m/0d02km	/award/award_nominee/award_nominations./award/award_nomination/award_nominee	/m/05qg6g	1
/m/0qm8b	/tv/non_character_role/tv_regular_personal_appearances./tv/tv_regular_personal_appearance/person	/m/02rmd_2	0
/m/042v_gx	/music/performance_role/regular_performances./music/group_membership/role	/m/026t6	1
/m/08z39v	/people/ethnicity/people	/m/03f5vvx	0
/m/0bl5c	/film/film/genre	/m/01g6gs	1
/m/03rl1g	/film/film/distributors./film/film_film_distributor_relationship/film_distribution_medium	/m/02px_23	0
/m/09fb5	/award/award_nominee/award_nominations./award/award_nomination/nominated_for	/m/0296rz	1
/m/012f86	/film/film_subject/films	/m/02yv_b	0
/m/01wy6	/music/performance_role/track_performances./music/track_contribution/role	/m/07_l6	1
/m/0d34_	/base/aareas/schema/administrative_area/administrative_parent	/m/0gpx6	0
/m/04wp63	/award/award_winner/awards_won./award/award_honor/award_winner	/m/09dvgb8	1
/m/0mw93	/people/person/gender	/m/0mw93	0
/m/01trxd	/education/educational_institution/students_graduates./education/education/major_field_of_study	/m/01mkq	1
/m/0cc63l	/film/film/release_date_s./film/film_regional_release_date/film_regional_debut_venue	/m/04jwly	0
/m/05tbn	/location/location/contains	/m/0fvzz	1
/m/0ch26b_	/film/film/release_date_s./film/film_regional_release_date/film_regional_debut_venue	/m/01fsv9	0
/m/02w0dc0	/award/award_nominee/award_nominations./award/award_nomination/nominated_for	/m/02q5g1z	1
/m/01l1rw	/location/country/form_of_government	/m/06qw_	0
/m/0gy30w	/film/film/genre	/m/01jfsb	1
/m/04344j	/film/film_set_designer/film_sets_designed	/m/0n3g	0
/m/03cfjg	/award/award_nominee/award_nominations./award/award_nomination/award_nominee	/m/01ww2fs	1
/m/05gml8	/film/film/cinematography	/m/01tntf	0
/m/03wbzp	/people/person/profession	/m/01d_h8	1
/m/0621cs	/tv/tv_program/genre	/m/059gkk	0
/m/014635	/people/person/profession	/m/0d8qb	1
/m/09g7vfw	/film/film/film_production_design_by	/m/0g5qmbz	0
/m/0199wf	/tv/tv_program/regular_cast./tv/regular_tv_appearance/actor	/m/015qt5	1
/m/0294mx	/film/film/other_crew./film/film_crew_gig/film_crew_role	/m/035v3	0
/m/05kwx2	/award/award_winner/awards_won./award/award_honor/award_winner	/m/0170pk	1
/m/047tsx3	/olympics/olympic_sport/athletes./olympics/olympic_athlete_affiliation/olympics	/m/0fbx6	0
/m/067ghz	/film/film/release_date_s./film/film_regional_release_date/film_release_region	/m/03h64	1
/m/05kwx2	/base/biblioness/bibs_location/state	/m/033db3	0
/m/039x1k	/award/award_nominee/award_nominations./award/award_nomination/nominated_for	/m/0c9k8	1
/m/01j7pt	/award/award_winner/awards_won./award/award_honor/award_winner	/m/0621cs	0
/m/02kxg_	/military/military_conflict/combatants./military/military_combatant_group/combatants	/m/01rdm0	1
/m/05wdgq	/government/politician/government_positions_held./government/government_position_held/legislative_sessions	/m/050xxm	0
/m/01cj6y	/award/award_nominee/award_nominations./award/award_nomination/award_nominee	/m/01pkhw	1
/m/01z3bz	/tv/tv_program/regular_cast./tv/regular_tv_appearance/actor	/m/0234j5	0
/m/01_xtx	/people/person/profession	/m/01d_h8	1
/m/0621cs	/base/schemastaging/organization_extra/phone_number./base/schemastaging/phone_sandbox/service_language	/m/0d810y	0
/m/07jjt	/olympics/olympic_sport/athletes./olympics/olympic_athlete_affiliation/country	/m/059j2	1
/m/0j0k	/medicine/symptom/symptom_of	/m/092kgw	0
/m/05szp	/award/award_nominee/award_nominations./award/award_nomination/award	/m/01c99j	1
/m/01my95	/film/film/executive_produced_by	/m/0n5yv	0
/m/0l6m5	/olympics/olympic_games/sports	/m/02bkg	1
/m/023vrq	/tv/tv_network/programs./tv/tv_network_duration/program	/m/02pxst	0
/m/03_gd	/people/person/profession	/m/01d_h8	1
/m/014vk4	/film/film/release_date_s./film/film_regional_release_date/film_regional_debut_venue	/m/05j0wc	0
/m/01vsnff	/music/artist/track_contributions./music/track_contribution/role	/m/0dwsp	1
/m/027nb	/military/military_conflict/combatants./military/military_combatant_group/combatants	/m/081lh	0
/m/012z8_	/music/artist/track_contributions./music/track_contribution/role	/m/05r5c	1
/m/02xlf	/dataworld/gardening_hint/split_to	/m/012f86	0
/m/028dcg	/education/educational_degree/people_with_this_degree./education/education/institution	/m/02zccd	1
/m/03xb2w	/location/hud_county_place/county	/m/06rny	0
/m/013q0p	/film/film/music	/m/01wd9lv	1
/m/01htxr	/sports/sport/pro_athletes./sports/pro_sports_played/athlete	/m/04x4s2	0
/m/06pr6	/location/location/contains	/m/02_gzx	1
/m/01r6jt2	/education/educational_institution/school_type	/m/0285m87	0
/m/0dj75	/food/food/nutrients./food/nutrition_fact/nutrient	/m/0h1yy	1
/m/04zjxcz	/base/americancomedy/celebrity_impressionist/celebrities_impersonated	/m/02vklm3	0
/m/03bxwtd	/award/award_nominee/award_nominations./award/award_nomination/award_nominee	/m/0412f5y	1
/m/0294mx	/film/film/personal_appearances./film/personal_film_appearance/person	/m/0k0q73t	0
/m/05pd94v	/award/award_ceremony/awards_presented./award/award_honor/award_winner	/m/016m5c	1
/m/08z39v	/base/petbreeds/city_with_dogs/top_breeds./base/petbreeds/dog_city_relationship/dog_breed	/m/0d02km	0
/m/043q4d	/tv/non_character_role/tv_regular_personal_appearances./tv/tv_regular_personal_appearance/person	/m/0261x8t	1
/m/05kwx2	/location/administrative_division/first_level_division_of	/m/05g56	0
/m/026c1	/film/actor/film./film/performance/film	/m/0ds2l81	1
/m/012x03	/travel/travel_destination/climate./travel/travel_destination_monthly_climate/month	/m/01j7pt	0
/m/02gl58	/tv/tv_program/genre	/m/01hmnh	1
/m/01c65z	/music/performance_role/guest_performances./music/recording_contribution/performance_role	/m/081lh	0
/m/0g51l1	/people/person/places_lived./people/place_lived/location	/m/02_286	1
/m/0fy59t	/people/person/place_of_birth	/m/0fbx6	0
/m/09qs08	/award/award_category/nominees./award/award_nomination/nominated_for	/m/01fszq	1
/m/0294mx	/film/film/personal_appearances./film/personal_film_appearance/person	/m/0bzn6_	0
/m/015mrk	/award/award_winner/awards_won./award/award_honor/award_winner	/m/016732	1
/m/08xvpn	/film/film_set_designer/film_sets_designed	/m/03f5vvx	0
/m/026ps1	/award/award_winner/awards_won./award/award_honor/award_winner	/m/011zf2	1
/m/016vn3	/film/film/film_production_design_by	/m/0l339	0
/m/02lnbg	/music/genre/artists	/m/09889g	1
/m/0249kn	/celebrities/celebrity/sexual_relationships./celebrities/romantic_relationship/celebrity	/m/02vx4	0
/m/07c52	/media_common/netflix_genre/titles	/m/05pbsry	1
/m/01fwf1	/music/performance_role/guest_performances./music/recording_contribution/performance_role	/m/032j_n	0
/m/03wpmd	/people/person/profession	/m/01d_h8	1
/m/06qw_	/organization/organization/place_founded	/m/01l1rw	0
/m/04xvlr	/media_common/netflix_genre/titles	/m/042y1c	1
/m/04vjh	/location/hud_county_place/county	/m/0fc9js	0
/m/02x_h0	/award/award_nominee/award_nominations./award/award_nomination/award_nominee	/m/0770cd	1
/m/039yzs	/film/film/featured_film_locations	/m/05ll37	0
/m/09889g	/influence/influence_node/peers./influence/peer_relationship/peers	/m/03j24kf	1
/m/0164v	/medicine/disease/risk_factors	/m/02x73k6	0
/m/09k56b7	/film/film/release_date_s./film/film_regional_release_date/film_release_region	/m/0d0kn	1
/m/0g5qmbz	/people/person/religion	/m/026kqs9	0
/m/0cqh6z	/award/award_category/winners./award/award_honor/award_winner	/m/03d_w3h	1
/m/04z4j2	/olympics/olympic_participating_country/athletes./olympics/olympic_athlete_affiliation/olympics	/m/014vk4	0
/m/02qpt1w	/award/award_winning_work/awards_won./award/award_honor/award_winner	/m/081lh	1
/m/05qjt	/tv/tv_producer/programs_produced./tv/tv_producer_term/program	/m/01ty7ll	0
/m/05r5c	/music/instrument/instrumentalists	/m/0bdlj	1
/m/069ld1	/people/person/employment_history./business/employment_tenure/company	/m/025rxjq	0
/m/05kwx2	/award/award_nominee/award_nominations./award/award_nomination/award_nominee	/m/0170pk	1
/m/013crh	/film/film/other_crew./film/film_crew_gig/crewmember	/m/0bkf4	0
/m/09k0f	/people/person/profession	/m/04gc2	1
/m/060s9	/dataworld/gardening_hint/split_to	/m/0d34_	0
/m/07gql	/music/performance_role/track_performances./music/track_contribution/role	/m/026t6	1
/m/032zg9	/film/film/genre	/m/01q8hj	0
/m/02h3d1	/award/award_category/winners./award/award_honor/award_winner	/m/0417z2	1
/m/06m6p7	/music/performance_role/track_performances./music/track_contribution/role	/m/0542n	0
/m/067ghz	/film/film/release_date_s./film/film_regional_release_date/film_release_distribution_medium	/m/029j_	1
/m/01wk3c	/education/educational_degree/people_with_this_degree./education/education/institution	/m/01wk3c	0
/m/051wwp	/award/award_winner/awards_won./award/award_honor/award_winner	/m/06j8wx	1
/m/07k2x	/people/person/languages	/m/04gr35	0
/m/0dq_5	/organization/role/leaders./organization/leadership/organization	/m/01yx7f	1
/m/01hcvm	/award/award_nominated_work/award_nominations./award/award_nomination/nominated_for	/m/02rqwhl	0
/m/016pns	/award/award_nominee/award_nominations./award/award_nomination/award	/m/023vrq	1
/m/01t2h2	/sports/sports_team/roster./baseball/baseball_roster_position/position	/m/0bkf4	0
/m/0krdk	/business/job_title/people_with_this_title./business/employment_tenure/company	/m/0z90c	1
/m/0dj0m5	/soccer/football_player/current_team./sports/sports_team_roster/team	/m/0c031k6	0
/m/016fjj	/award/award_nominee/award_nominations./award/award_nomination/award_nominee	/m/042ly5	1
/m/07wjk	/government/legislative_session/members./government/government_position_held/legislative_sessions	/m/01gtcc	0
/m/02r9p0c	/film/film/genre	/m/02kdv5l	1
/m/05mcjs	/organization/organization/place_founded	/m/03x_k5m	0
/m/031f_m	/film/film/dubbing_performances./film/dubbing_performance/actor	/m/01x_d8	1
/m/01c65z	/award/award_ceremony/awards_presented./award/award_honor/award_winner	/m/09fb5	0
/m/0dq_5	/business/job_title/people_with_this_title./business/employment_tenure/company	/m/0gvbw	1
/m/03n6r	/location/hud_county_place/county	/m/01c9f2	0
/m/07m77x	/film/actor/film./film/performance/film	/m/0416y94	1
/m/01fsv9	/film/film/cinematography	/m/0krdk	0
/m/0794g	/base/popstra/celebrity/friendship./base/popstra/friendship/participant	/m/02mjf2	1
/m/064lsn	/base/biblioness/bibs_location/state	/m/04f6df0	0
/m/015f7	/award/award_nominee/award_nominations./award/award_nomination/award	/m/05b4l5x	1
/m/02px_23	/music/artist/track_contributions./music/track_contribution/role	/m/0krdk	0
/m/03g90h	/film/film/release_date_s./film/film_regional_release_date/film_release_region	/m/05sb1	1
/m/01nv4h	/travel/travel_destination/how_to_get_here./travel/transportation/mode_of_transportation	/m/02_n3z	0
/m/0bhvtc	/award/award_nominated_work/award_nominations./award/award_nomination/nominated_for	/m/03cfjg	1
/m/0fzm0g	/dataworld/gardening_hint/split_to	/m/04sntd	0
/m/060c4	/organization/role/leaders./organization/leadership/organization	/m/02bhj4	1
/m/02zrv7	/award/award_nominee/award_nominations./award/award_nomination/award_nominee	/m/01722w	0
/m/032xhg	/film/actor/film./film/performance/film	/m/02x2jl_	1
/m/04mrfv	/government/legislative_session/members./government/government_position_held/legislative_sessions	/m/01yznp	0
/m/0p9sw	/award/award_category/nominees./award/award_nomination/nominated_for	/m/01kf4tt	1
/m/027nb	/location/us_county/county_seat	/m/05mcjs	0
/m/051wwp	/award/award_winner/awards_won./award/award_honor/award_winner	/m/01hkhq	1
/m/03p85	/base/popstra/celebrity/friendship./base/popstra/friendship/participant	/m/01tszq	0
/m/0d04z6	/olympics/olympic_participating_country/medals_won./olympics/olympic_medal_honor/olympics	/m/018wrk	1
/m/04gr35	/music/performance_role/track_performances./music/track_contribution/role	/m/03n6r	0
/m/01csqg	/education/educational_institution/students_graduates./education/education/major_field_of_study	/m/05qjt	1
/m/0285m87	/people/person/sibling_s./people/sibling_relationship/sibling	/m/04l57x	0
/m/01d38t	/award/award_category/winners./award/award_honor/ceremony	/m/02rjjll	1
/m/05byxm	/education/educational_degree/people_with_this_degree./education/education/student	/m/02_hj4	0
/m/03t22m	/music/instrument/instrumentalists	/m/01ky2h	1
/m/026n998	/location/location/adjoin_s./location/adjoining_relationship/adjoins	/m/0234j5	0
/m/063b4k	/film/director/film	/m/091z_p	1
/m/07ytt	/sports/sports_team/roster./baseball/baseball_roster_position/position	/m/01c99j	0
/m/012vd6	/music/artist/track_contributions./music/track_contribution/role	/m/05r5c	1
/m/01yznp	/travel/travel_destination/climate./travel/travel_destination_monthly_climate/month	/m/03p85	0
/m/060c4	/organization/role/leaders./organization/leadership/organization	/m/0bwfn	1
/m/02773nt	/base/schemastaging/organization_extra/phone_number./base/schemastaging/phone_sandbox/contact_category	/m/0gy30w	0
/m/05l71	/sports/sports_team/roster./american_football/football_historical_roster_position/position_s	/m/01r3hr	1
/m/04_tv	/film/film/story_by	/m/02z13jg	0
/m/031f_m	/film/film/genre	/m/01jfsb	1
/m/06rny	/people/person/profession	/m/0ch280	0
/m/02vx4	/sports/sport/pro_athletes./sports/pro_sports_played/athlete	/m/0g9zjp	1
/m/01cwcr	/base/localfood/seasonal_month/produce_available./base/localfood/produce_availability/seasonal_months	/m/05_6_y	0
/m/0fb7sd	/film/film/country	/m/0345h	1
/m/0fy59t	/film/film/produced_by	/m/06m6p7	0
/m/0151b0	/music/performance_role/regular_performances./music/group_membership/role	/m/03qmg1	1
/m/01nxzv	/location/country/form_of_government	/m/01gw8b	0
/m/05qfh	/education/field_of_study/students_majoring./education/education/student	/m/016kjs	1
/m/03d6fyn	/base/x2010fifaworldcupsouthafrica/world_cup_squad/current_world_cup_squad./base/x2010fifaworldcupsouthafrica/current_world_cup_squad/current_club	/m/0bx0lc	0
/m/06mzp	/location/country/official_language	/m/02bjrlw	1
/m/03hbzj	/film/film/estimated_budget./measurement_unit/dated_money_value/currency	/m/0jmk7	0
/m/070mff	/government/legislative_session/members./government/government_position_held/district_represented	/m/02xry	1
/m/02js9	/music/group_member/membership./music/group_membership/role	/m/0294mx	0
/m/016sp_	/award/award_nominee/award_nominations./award/award_nomination/award_nominee	/m/02cx90	1
/m/02px_23	/location/country/capital	/m/0cv1h	0
/m/04xvlr	/media_common/netflix_genre/titles	/m/0353xq	1
/m/027nb	/location/administrative_division/country	/m/0gd_b_	0
/m/02w7fs	/award/award_category/winners./award/award_honor/ceremony	/m/01c6qp	1
/m/063_t	/organization/organization/headquarters./location/mailing_address/state_province_region	/m/0137n0	0
/m/057_yx	/film/actor/film./film/performance/film	/m/047csmy	1
/m/02ltg3	/education/educational_institution/colors	/m/07yk1xz	0
/m/02x4sn8	/award/award_category/nominees./award/award_nomination/nominated_for	/m/0320fn	1
/m/064lsn	/base/popstra/celebrity/friendship./base/popstra/friendship/participant	/m/013_vh	0
/m/01gb54	/award/award_nominee/award_nominations./award/award_nomination/award_nominee	/m/016dmx	1
/m/077yk0	/dataworld/gardening_hint/split_to	/m/07y0n	0
/m/06w99h3	/film/film/release_date_s./film/film_regional_release_date/film_release_distribution_medium	/m/029j_	1
/m/01_xtx	/award/award_category/nominees./award/award_nomination/nominated_for	/m/01fsv9	0
/m/0dq_5	/business/job_title/people_with_this_title./business/employment_tenure/company	/m/0300cp	1
/m/05ll37	/education/educational_degree/people_with_this_degree./education/education/student	/m/01z3bz	0
/m/014vk4	/award/award_winner/awards_won./award/award_honor/award_winner	/m/09b6zr	1
/m/0fcrg	/base/marchmadness/ncaa_basketball_tournament/seeds./base/marchmadness/ncaa_tournament_seed/team	/m/05_6_y	0
/m/027nb	/organization/organization_member/member_of./organization/organization_membership/organization	/m/041288	1
/m/0278x6s	/people/ethnicity/languages_spoken	/m/01twdk	0
/m/0bc773	/award/award_ceremony/awards_presented./award/award_honor/award_winner	/m/09hnb	1
/m/0gd_b_	/film/film/featured_film_locations	/m/0bdlj	0
/m/07m77x	/award/award_nominee/award_nominations./award/award_nomination/award_nominee	/m/051wwp	1
/m/04l57x	/influence/influence_node/influenced_by	/m/039yzs	0
/m/0b9rdk	/film/film/costume_design_by	/m/03qhyn8	1
/m/0fphf3v	/organization/endowed_organization/endowment./measurement_unit/dated_money_value/currency	/m/0bkf4	0
/m/03_8r	/olympics/olympic_sport/athletes./olympics/olympic_athlete_affiliation/country	/m/01nln	1
/m/01wqg8	/music/performance_role/regular_performances./music/group_membership/role	/m/04jn6y7	0
/m/0260bz	/award/award_winning_work/awards_won./award/award_honor/award_winner	/m/016dmx	1
/m/02tr7d	/location/administrative_division/country	/m/04czx7	0
/m/01k8rb	/people/person/gender	/m/02zsn	1
/m/01_xtx	/education/educational_degree/people_with_this_degree./education/education/student	/m/0194d	0
/m/01pv91	/award/award_winning_work/awards_won./award/award_honor/award_winner	/m/01gb54	1
/m/01tntf	/medicine/disease/risk_factors	/m/01nxzv	0
/m/02rjjll	/award/award_ceremony/awards_presented./award/award_honor/award_winner	/m/03gr7w	1
/m/0249kn	/baseball/baseball_team/team_stats./baseball/baseball_team_stats/season	/m/0l178	0
/m/016zp5	/award/award_winner/awards_won./award/award_honor/award_winner	/m/02gvwz	1
/m/02xb2bt	/location/hud_county_place/county	/m/02x73k6	0
/m/0sw6g	/award/award_nominee/award_nominations./award/award_nomination/award	/m/0bdw6t	1
/m/05t54s	/people/person/nationality	/m/04sntd	0
/m/0191n	/award/award_winning_work/awards_won./award/award_honor/award_winner	/m/02fn5	1
/m/01qdhx	/film/director/film	/m/026n998	0
/m/01wgxtl	/base/popstra/celebrity/friendship./base/popstra/friendship/participant	/m/04xrx	1
/m/032j_n	/award/award_category/winners./award/award_honor/award_winner	/m/01tntf	0
/m/03f4k	/people/person/sibling_s./people/sibling_relationship/sibling	/m/03zrp	1
/m/0c031k6	/base/biblioness/bibs_location/state	/m/02tr7d	0
/m/0hvb2	/award/award_nominee/award_nominations./award/award_nomination/nominated_for	/m/01vnbh	1
/m/023vrq	/sports/sports_team/roster./american_football/football_historical_roster_position/position_s	/m/01wqg8	0
/m/02zs4	/business/business_operation/industry	/m/0k4j	1
/m/02x73k6	/user/ktrueman/default_domain/international_organization/member_states	/m/0dhd5	0
/m/0d060g	/location/location/contains	/m/01gb_p	1
/m/012dtf	/education/educational_degree/people_with_this_degree./education/education/major_field_of_study	/m/059gkk	0
/m/053vcrp	/film/film_set_designer/film_sets_designed	/m/04v8x9	1
/m/0p07_	/film/film/country	/m/0cbxl0	0
/m/024rdh	/film/film_distributor/films_distributed./film/film_film_distributor_relationship/film	/m/0cmc26r	1
/m/04sntd	/celebrities/celebrity/celebrity_friends./celebrities/friendship/friend	/m/03_3d	0
/m/0dwsp	/music/instrument/instrumentalists	/m/01vsnff	1
/m/03xl77	/government/politician/government_positions_held./government/government_position_held/jurisdiction_of_office	/m/0cbxl0	0
/m/0205dx	/award/award_nominee/award_nominations./award/award_nomination/award	/m/02w9sd7	1
/m/0k0q73t	/location/statistical_region/places_exported_to./location/imports_and_exports/exported_to	/m/0p07_	0
/m/0lzkm	/music/artist/origin	/m/01_d4	1
/m/02d42t	/education/educational_institution/students_graduates./education/education/student	/m/027nb	0
/m/02_286	/travel/travel_destination/climate./travel/travel_destination_monthly_climate/month	/m/06vkl	1
/m/04999m	/film/film/film_production_design_by	/m/0n1rj	0
/m/020fcn	/award/award_winning_work/awards_won./award/award_honor/award	/m/018wdw	1
/m/0d02km	/film/film/other_crew./film/film_crew_gig/crewmember	/m/0j1z8	0
/m/02114t	/film/actor/film./film/performance/film	/m/01jzyf	1
/m/02js9	/tv/tv_program/genre	/m/01s9vc	0
/m/03qbnj	/award/award_category/winners./award/award_honor/award_winner	/m/016732	1
/m/07k2x	/music/instrument/instrumentalists	/m/02yv_b	0
/m/0cxn2	/food/food/nutrients./food/nutrition_fact/nutrient	/m/02kc5rj	1
/m/01c9f2	/ice_hockey/hockey_team/current_roster./sports/sports_team_roster/position	/m/03f68r6	0
/m/0ds33	/film/film/genre	/m/01jfsb	1
/m/02zccd	/base/locations/continents/countries_within	/m/01l1rw	0
/m/03mg35	/award/award_nominee/award_nominations./award/award_nomination/award	/m/02w9sd7	1
/m/01c99j	/location/country/official_language	/m/074qgb	0
/m/0cmf0m0	/film/film/release_date_s./film/film_regional_release_date/film_release_region	/m/07t21	1
/m/02xlf	/user/jg/default_domain/olympic_games/sports	/m/029h7y	0
/m/06by7	/music/genre/artists	/m/032nwy	1
/m/0222qb	/film/film/genre	/m/02n9nmz	0
/m/01bx35	/award/award_ceremony/awards_presented./award/award_honor/award_winner	/m/01x6v6	1
/m/081lh	/education/field_of_study/students_majoring./education/education/major_field_of_study	/m/02zs4	0
/m/02hsq3m	/award/award_category/nominees./award/award_nomination/nominated_for	/m/020fcn	1
/m/0ght2	/film/film/release_date_s./film/film_regional_release_date/film_regional_debut_venue	/m/07w6r	0
/m/07w6r	/education/educational_institution/students_graduates./education/education/major_field_of_study	/m/05qjt	1
/m/04z4j2	/sports/sports_team/roster./american_football/football_historical_roster_position/position_s	/m/037d35	0
/m/04gnbv1	/tv/tv_producer/programs_produced./tv/tv_producer_term/program	/m/02rzdcp	1
/m/012vd6	/organization/organization_founder/organizations_founded	/m/0ch280	0
/m/028mc6	/people/person/place_of_birth	/m/013kcv	1
/m/01fb6d	/location/country/form_of_government	/m/0jmk7	0
/m/027vps	/people/person/places_lived./people/place_lived/location	/m/05tbn	1
/m/02x73k6	/education/university/international_tuition./measurement_unit/dated_money_value/currency	/m/027s39y	0
/m/070bjw	/award/award_nominee/award_nominations./award/award_nomination/award_nominee	/m/06hzsx	1
/m/02xb2bt	/music/artist/origin	/m/02j490	0
/m/0gvvm6l	/film/film/country	/m/0345h	1
/m/07w6r	/government/government_office_category/officeholders./government/government_position_held/jurisdiction_of_office	/m/0l2yf	0
/m/03459x	/film/film/genre	/m/02kdv5l	1
/m/07yw6t	/location/statistical_region/religions./location/religion_percentage/religion	/m/02grdc	0
/m/05nlx4	/film/film/genre	/m/03k9fj	1
/m/05mcjs	/dataworld/gardening_hint/split_to	/m/07w6r	0
/m/043kzcr	/award/award_nominee/award_nominations./award/award_nomination/nominated_for	/m/0ds3t5x	1
/m/02cg2v	/film/film/film_production_design_by	/m/08z39v	0
/m/0kst7v	/people/person/languages	/m/03k50	1
/m/01nv4h	/people/ethnicity/geographic_distribution	/m/041r51	0
/m/0bxtg	/award/award_nominee/award_nominations./award/award_nomination/award_nominee	/m/02d4ct	1
/m/02w70	/education/university/local_tuition./measurement_unit/dated_money_value/currency	/m/032zg9	0
/m/05148p4	/music/performance_role/regular_performances./music/group_membership/role	/m/0j871	1
/m/01n4w	/organization/organization/place_founded	/m/03_3d	0
/m/0dq23	/business/business_operation/industry	/m/019mlh	1
/m/0163m1	/military/military_conflict/combatants./military/military_combatant_group/combatants	/m/011w20	0
/m/0cc8l6d	/award/award_category/winners./award/award_honor/award_winner	/m/06jrhz	1
/m/0294zg	/film/film/featured_film_locations	/m/01my95	0
/m/07h565	/award/award_winner/awards_won./award/award_honor/award_winner	/m/013knm	1
/m/098n_m	/language/human_language/countries_spoken_in	/m/025rxjq	0
/m/060c4	/organization/role/leaders./organization/leadership/organization	/m/0q19t	1
/m/01hcvm	/base/popstra/celebrity/breakup./base/popstra/breakup/participant	/m/05ff6	0
/m/04xrx	/award/award_nominee/award_nominations./award/award_nomination/award	/m/01c99j	1
/m/01t_wfl	/award/award_nominee/award_nominations./award/award_nomination/award_nominee	/m/0krdk	0
/m/08m4c8	/people/person/places_lived./people/place_lived/location	/m/02_286	1
/m/0249kn	/tv/tv_network/programs./tv/tv_network_duration/program	/m/05ll37	0
/m/0bkq7	/film/film/genre	/m/01g6gs	1
/m/07w6r	/people/person/employment_history./business/employment_tenure/company	/m/0892sx	0
/m/028q6	/music/group_member/membership./music/group_membership/role	/m/05r5c	1
/m/05xvj	/tv/tv_writer/tv_programs./tv/tv_program_writer_relationship/tv_program	/m/02z13jg	0
/m/02grdc	/award/award_category/winners./award/award_honor/ceremony	/m/01c6qp	1
/m/0drc1	/medicine/symptom/symptom_of	/m/025rxjq	0
/m/09pj68	/award/award_ceremony/awards_presented./award/award_honor/award_winner	/m/014x77	1
/m/0jcx1	/education/university/international_tuition./measurement_unit/dated_money_value/currency	/m/01gy7r	0
/m/05qzv	/influence/influence_node/influenced_by	/m/032l1	1
/m/063_t	/people/person/languages	/m/03f68r6	0
/m/015pdg	/music/genre/artists	/m/03gr7w	1
/m/05wdgq	/film/film/runtime./film/film_cut/film_release_region	/m/01j7pt	0
/m/05cgy8	/people/person/profession	/m/0dgd_	1
/m/0k9ts	/location/location/adjoin_s./location/adjoining_relationship/adjoins	/m/0gfmc_	0
/m/015n8	/people/deceased_person/place_of_death	/m/07g0_	1
/m/0mx6c	/sports/sport/pro_athletes./sports/pro_sports_played/athlete	/m/01t_wfl	0
/m/01f7v_	/film/director/film	/m/01f8f7	1
/m/0222qb	/location/us_county/county_seat	/m/0m32h	0
/m/0fpgp26	/film/film/genre	/m/03k9fj	1
/m/016z9n	/sports/sports_position/players./sports/sports_team_roster/team	/m/0j871	0
/m/0c3xw46	/film/film/release_date_s./film/film_regional_release_date/film_release_region	/m/06mzp	1
/m/0b5x23	/government/legislative_session/members./government/government_position_held/district_represented	/m/015wc0	0
/m/026dd2b	/award/award_nominee/award_nominations./award/award_nomination/nominated_for	/m/0gj50	1
/m/02rrh1w	/location/country/form_of_government	/m/06pvr	0
/m/03wpmd	/award/award_winner/awards_won./award/award_honor/award_winner	/m/0cbxl0	1
/m/0ght2	/film/film/featured_film_locations	/m/0l2yf	0
/m/0bwfn	/education/educational_institution/students_graduates./education/education/student	/m/0892sx	1
/m/01fb6d	/education/field_of_study/students_majoring./education/education/major_field_of_study	/m/01z3bz	0
/m/01wyy_	/people/person/place_of_birth	/m/06wxw	1
/m/01wbgdv	/film/film/production_companies	/m/04205z	0
/m/01l1rw	/people/person/place_of_birth	/m/02_286	1
/m/01c99j	/user/ktrueman/default_domain/international_organization/member_states	/m/04z4j2	0
/m/014zcr	/award/award_nominee/award_nominations./award/award_nomination/nominated_for	/m/029k4p	1
/m/02bg8v	/music/instrument/family	/m/01s9vc	0
/m/06w7v	/music/performance_role/regular_performances./music/group_membership/role	/m/05148p4	1
/m/02_n3z	/government/politician/government_positions_held./government/government_position_held/jurisdiction_of_office	/m/041r51	0
/m/059t8	/location/location/contains	/m/02dj3	1
/m/01gtcc	/education/educational_institution/students_graduates./education/education/student	/m/014vk4	0
/m/05jcn8	/award/award_nominee/award_nominations./award/award_nomination/nominated_for	/m/027s39y	1
/m/01w20rx	/people/person/languages	/m/06d4h	0
/m/01g0jn	/base/popstra/celebrity/breakup./base/popstra/breakup/participant	/m/02114t	1
/m/02zrv7	/organization/organization_member/member_of./organization/organization_membership/organization	/m/02tjl3	0
/m/034x61	/award/award_winner/awards_won./award/award_honor/award_winner	/m/0k2mxq	1
/m/02bg8v	/tv/tv_program/genre	/m/07k2x	0
/m/02lnbg	/music/genre/artists	/m/05szp	1
/m/07w6r	/american_football/football_team/current_roster./sports/sports_team_roster/position	/m/01gwck	0
/m/018cqq	/user/ktrueman/default_domain/international_organization/member_states	/m/0d060g	1
/m/074qgb	/location/location/adjoin_s./location/adjoining_relationship/adjoins	/m/09fb5	0
/m/0b_6xf	/time/event/locations	/m/0lhql	1
/m/0dzlk	/award/award_ceremony/awards_presented./award/award_honor/honored_for	/m/0mzkr	0
/m/012d40	/people/person/nationality	/m/03h64	1
/m/03lgg	/film/film/film_production_design_by	/m/0krdk	0
/m/018wdw	/award/award_category/nominees./award/award_nomination/nominated_for	/m/072r5v	1
/m/01htxr	/music/performance_role/regular_performances./music/group_membership/role	/m/035v3	0
/m/02zd460	/education/educational_institution/students_graduates./education/education/student	/m/02cg2v	1
/m/03d6fyn	/tv/non_character_role/tv_regular_personal_appearances./tv/tv_regular_personal_appearance/person	/m/01z3bz	0
/m/0jzw	/award/ranked_item/appears_in_ranked_lists./award/ranking/list	/m/05glt	1
/m/05xvj	/award/award_nominee/award_nominations./award/award_nomination/award_nominee	/m/02rlj20	0
/m/02ppm4q	/award/award_category/winners./award/award_honor/award_winner	/m/0dvld	1
/m/06j8wx	/base/aareas/schema/administrative_area/capital	/m/03rl1g	0
/m/0jyb4	/film/film/release_date_s./film/film_regional_release_date/film_release_region	/m/0k6nt	1
/m/032zg9	/award/award_nominee/award_nominations./award/award_nomination/award_nominee	/m/01gtcc	0
[truncated: 848 more rows]
