# Supplementary material
Source: ML conference proceedings conference paper supplement (https://proceedings.neurips.cc/paper_files/paper/2021/hash/0fd600c953cde8121262e322ef09f70e-Abstract.html)
Supplement: Supplementary file 1 [file 0fd600c953cde8121262e322ef09f70e-Supplemental.zip › Supplementary_Material_Paper_8745/data/GraIL-BM_fb237_v4/train/train.txt]

/m/05f7w84	/tv/tv_program/genre	/m/05p553
/m/0g701n	/soccer/football_team/current_roster./soccer/football_roster_position/position	/m/02_j1w
/m/0gfsq9	/film/film/other_crew./film/film_crew_gig/film_crew_role	/m/09zzb8
/m/02h4rq6	/education/educational_degree/people_with_this_degree./education/education/institution	/m/022jr5
/m/0330r	/tv/tv_program/genre	/m/0c4xc
/m/0bh8yn3	/film/film/release_date_s./film/film_regional_release_date/film_release_region	/m/0ctw_b
/m/02hy9p	/award/award_nominee/award_nominations./award/award_nomination/nominated_for	/m/0n83s
/m/02p65p	/award/award_nominee/award_nominations./award/award_nomination/award_nominee	/m/04sx9_
/m/0f8l9c	/organization/organization_member/member_of./organization/organization_membership/organization	/m/02jxk
/m/02b0yz	/soccer/football_team/current_roster./soccer/football_roster_position/position	/m/0dgrmp
/m/012vby	/award/award_nominee/award_nominations./award/award_nomination/award	/m/054ky1
/m/01vvyc_	/base/popstra/celebrity/canoodled./base/popstra/canoodled/participant	/m/03f3yfj
/m/0pd64	/film/film/release_date_s./film/film_regional_release_date/film_release_region	/m/0b90_r
/m/0m2wm	/people/person/languages	/m/064_8sq
/m/0534v	/people/person/places_lived./people/place_lived/location	/m/07dfk
/m/01z27	/olympics/olympic_sport/athletes./olympics/olympic_athlete_affiliation/country	/m/05qhw
/m/039bp	/film/actor/film./film/performance/film	/m/032sl_
/m/011wtv	/film/film/other_crew./film/film_crew_gig/film_crew_role	/m/02r96rf
/m/02_j1w	/sports/sports_position/players./sports/sports_team_roster/team	/m/057pq5
/m/01xwv7	/people/person/profession	/m/0n1h
/m/0gs96	/award/award_category/winners./award/award_honor/award_winner	/m/02cqbx
/m/01nms7	/award/award_nominee/award_nominations./award/award_nomination/award	/m/09sb52
/m/043t8t	/film/film/other_crew./film/film_crew_gig/film_crew_role	/m/09vw2b7
/m/02_j1w	/sports/sports_position/players./sports/sports_team_roster/team	/m/06ylv0
/m/0789_m	/award/award_category/winners./award/award_honor/award_winner	/m/0301bq
/m/04gycf	/people/person/spouse_s./people/marriage/type_of_union	/m/04ztj
/m/0kz4w	/soccer/football_team/current_roster./soccer/football_roster_position/position	/m/0dgrmp
/m/04jkpgv	/film/film/release_date_s./film/film_regional_release_date/film_release_distribution_medium	/m/07z4p
/m/01vnt4	/music/performance_role/track_performances./music/track_contribution/role	/m/03qlv7
/m/04t2l2	/base/popstra/celebrity/friendship./base/popstra/friendship/participant	/m/01xdf5
/m/02bgmr	/people/person/profession	/m/01c72t
/m/0hnkp	/film/actor/film./film/performance/film	/m/0gcpc
/m/060j8b	/base/popstra/celebrity/friendship./base/popstra/friendship/participant	/m/08hsww
/m/02_xgp2	/education/educational_degree/people_with_this_degree./education/education/institution	/m/01jswq
/m/0qmk5	/tv/tv_program/genre	/m/07s9rl0
/m/02_7t	/education/field_of_study/students_majoring./education/education/major_field_of_study	/m/0g26h
/m/076xkps	/film/film/other_crew./film/film_crew_gig/film_crew_role	/m/0dxtw
/m/04gv3db	/film/film/featured_film_locations	/m/01d26y
/m/013pk3	/award/award_nominee/award_nominations./award/award_nomination/award_nominee	/m/03l3ln
/m/0dzc16	/film/actor/film./film/performance/film	/m/0ndsl1x
/m/0k20s	/film/film/country	/m/0h3y
/m/01c9dd	/award/award_category/winners./award/award_honor/award_winner	/m/01vw20h
/m/03rjj	/olympics/olympic_participating_country/medals_won./olympics/olympic_medal_honor/olympics	/m/0lbbj
/m/0mk59	/base/aareas/schema/administrative_area/administrative_parent	/m/0846v
/m/01chc7	/people/person/gender	/m/05zppz
/m/05p1tzf	/film/film/language	/m/02h40lc
/m/04dn09n	/award/award_category/winners./award/award_honor/award_winner	/m/01q415
/m/0kpys	/location/location/contains	/m/0281rp
/m/02wrhj	/people/person/spouse_s./people/marriage/type_of_union	/m/04ztj
/m/02_j1w	/sports/sports_position/players./sports/sports_team_roster/team	/m/0287xhr
/m/04sry	/award/award_nominee/award_nominations./award/award_nomination/award	/m/054ky1
/m/046b0s	/award/award_nominee/award_nominations./award/award_nomination/award_nominee	/m/03ktjq
/m/0jsw9l	/people/person/gender	/m/05zppz
/m/01vvb4m	/base/popstra/celebrity/dated./base/popstra/dated/participant	/m/0m66w
/m/053yx	/people/person/profession	/m/0n1h
/m/0140t7	/film/actor/film./film/performance/film	/m/0295sy
/m/01crd5	/organization/organization_member/member_of./organization/organization_membership/organization	/m/0_2v
/m/02kk_c	/tv/tv_program/regular_cast./tv/regular_tv_appearance/actor	/m/03cglm
/m/0hvvf	/film/film/genre	/m/07s9rl0
/m/0bynt	/olympics/olympic_sport/athletes./olympics/olympic_athlete_affiliation/country	/m/03rjj
/m/026p4q7	/film/film/produced_by	/m/030_3z
/m/05css_	/film/film/genre	/m/02l7c8
/m/0fz20l	/award/award_ceremony/awards_presented./award/award_honor/honored_for	/m/0kbf1
/m/07nv3_	/people/person/gender	/m/05zppz
/m/0ctw_b	/location/location/adjoin_s./location/adjoining_relationship/adjoins	/m/0chghy
/m/01352_	/base/x2010fifaworldcupsouthafrica/world_cup_squad/current_world_cup_squad./base/x2010fifaworldcupsouthafrica/current_world_cup_squad/current_club	/m/02rh_0
/m/0jv5x	/soccer/football_team/current_roster./soccer/football_roster_position/position	/m/02_j1w
/m/06wbm8q	/film/film/release_date_s./film/film_regional_release_date/film_release_region	/m/0chghy
/m/014mlp	/education/educational_degree/people_with_this_degree./education/education/major_field_of_study	/m/03r8gp
/m/023r2x	/music/performance_role/track_performances./music/track_contribution/role	/m/01xqw
/m/0dnkmq	/film/film/other_crew./film/film_crew_gig/film_crew_role	/m/0ch6mp2
/m/028tv0	/music/performance_role/regular_performances./music/group_membership/group	/m/0143q0
/m/02lf0c	/people/person/gender	/m/05zppz
/m/01hww_	/music/performance_role/regular_performances./music/group_membership/role	/m/01xqw
/m/06czyr	/people/person/religion	/m/0c8wxp
/m/02lf70	/award/award_nominee/award_nominations./award/award_nomination/award_nominee	/m/01l1sq
/m/09th87	/sports/sports_league_draft/picks./sports/sports_league_draft_pick/school	/m/01jsn5
/m/02_ssl	/sports/sports_position/players./sports/sports_team_roster/team	/m/027yf83
/m/016tt2	/film/film_distributor/films_distributed./film/film_film_distributor_relationship/film	/m/01_1hw
/m/02whj	/people/person/spouse_s./people/marriage/type_of_union	/m/04ztj
/m/0cw10	/people/person/spouse_s./people/marriage/type_of_union	/m/04ztj
/m/0kjrx	/film/actor/film./film/performance/film	/m/07tw_b
/m/03c_pqj	/people/person/place_of_birth	/m/0fl2s
/m/01v3rb	/business/business_operation/industry	/m/020mfr
/m/0bby9p5	/film/film/other_crew./film/film_crew_gig/film_crew_role	/m/02r96rf
/m/08s6mr	/film/film/genre	/m/05p553
/m/0169dl	/celebrities/celebrity/sexual_relationships./celebrities/romantic_relationship/celebrity	/m/01fwj8
/m/04zd4m	/people/person/profession	/m/0cbd2
/m/01cw51	/award/award_category/winners./award/award_honor/award_winner	/m/03d2k
/m/0fp_xp	/soccer/football_player/current_team./sports/sports_team_roster/team	/m/05z01
/m/0db94w	/film/film/release_date_s./film/film_regional_release_date/film_regional_debut_venue	/m/018cvf
/m/0311wg	/film/actor/film./film/performance/film	/m/01f7gh
/m/0gkxgfq	/award/award_ceremony/awards_presented./award/award_honor/award_winner	/m/049_zz
/m/01wk7b7	/base/popstra/celebrity/friendship./base/popstra/friendship/participant	/m/0sx5w
/m/015c4g	/award/award_nominee/award_nominations./award/award_nomination/nominated_for	/m/08nhfc1
/m/02brqp	/base/schemastaging/organization_extra/phone_number./base/schemastaging/phone_sandbox/service_language	/m/02h40lc
/m/02q3bb	/film/actor/film./film/performance/film	/m/017z49
/m/0d_wms	/film/film/language	/m/02h40lc
/m/0qm9n	/film/film/release_date_s./film/film_regional_release_date/film_release_region	/m/0f8l9c
/m/02rh_0	/soccer/football_team/current_roster./sports/sports_team_roster/position	/m/0dgrmp
/m/03_wj_	/award/award_winner/awards_won./award/award_honor/award_winner	/m/044mjy
/m/01679d	/music/performance_role/track_performances./music/track_contribution/role	/m/02sgy
/m/04t36	/media_common/netflix_genre/titles	/m/02q_4ph
/m/01jw4r	/award/award_nominee/award_nominations./award/award_nomination/award_nominee	/m/016yvw
/m/026lyl4	/people/person/spouse_s./people/marriage/type_of_union	/m/04ztj
/m/0hn821n	/award/award_ceremony/awards_presented./award/award_honor/award_winner	/m/02wk_43
/m/0879bpq	/film/film/music	/m/04pf4r
/m/016jny	/music/genre/artists	/m/01qmy04
/m/011yqc	/film/film/release_date_s./film/film_regional_release_date/film_release_region	/m/07f1x
/m/0cc8q3	/base/marchmadness/ncaa_basketball_tournament/seeds./base/marchmadness/ncaa_tournament_seed/team	/m/027yf83
/m/01chc7	/award/award_nominee/award_nominations./award/award_nomination/award_nominee	/m/048lv
/m/0yls9	/education/educational_institution/students_graduates./education/education/student	/m/0136g9
/m/0qmfz	/award/award_winning_work/awards_won./award/award_honor/award_winner	/m/01vwllw
/m/07s9rl0	/media_common/netflix_genre/titles	/m/06cm5
/m/0466s8n	/film/film/other_crew./film/film_crew_gig/film_crew_role	/m/01pvkk
/m/0h1nt	/award/award_nominee/award_nominations./award/award_nomination/award_nominee	/m/027f7dj
/m/02_xgp2	/education/educational_degree/people_with_this_degree./education/education/institution	/m/01bdhf
/m/01cmp9	/film/film/story_by	/m/0jf1b
/m/0ctw_b	/location/statistical_region/gdp_real./measurement_unit/adjusted_money_value/adjustment_currency	/m/09nqf
/m/06pj8	/award/award_nominee/award_nominations./award/award_nomination/nominated_for	/m/0cc5qkt
/m/06msq2	/people/person/profession	/m/0cbd2
/m/02jyhv	/base/popstra/celebrity/friendship./base/popstra/friendship/participant	/m/0227vl
/m/02f5qb	/award/award_category/winners./award/award_honor/award_winner	/m/01wyz92
/m/065dc4	/film/film/produced_by	/m/04wvhz
/m/017z49	/film/film/release_date_s./film/film_regional_release_date/film_release_region	/m/0154j
/m/0p17j	/people/person/place_of_birth	/m/030qb3t
/m/02g3w	/people/person/gender	/m/05zppz
/m/0b7l4x	/film/film/edited_by	/m/04cy8rb
/m/0cp0ph6	/film/film/release_date_s./film/film_regional_release_date/film_release_region	/m/015fr
/m/0gqz2	/award/award_category/winners./award/award_honor/ceremony	/m/073hmq
/m/0645k5	/film/film/release_date_s./film/film_regional_release_date/film_release_region	/m/047yc
/m/0gs96	/award/award_category/nominees./award/award_nomination/nominated_for	/m/05p09dd
/m/02rky4	/education/university/domestic_tuition./measurement_unit/dated_money_value/currency	/m/09nqf
/m/026s90	/music/record_label/artist	/m/0c9d9
/m/01713c	/award/award_nominee/award_nominations./award/award_nomination/award	/m/09sdmz
/m/047gpsd	/film/film/other_crew./film/film_crew_gig/film_crew_role	/m/09zzb8
/m/040njc	/award/award_category/nominees./award/award_nomination/nominated_for	/m/063hp4
/m/020ddc	/education/educational_institution/students_graduates./education/education/student	/m/0jt90f5
/m/04ztj	/people/marriage_union_type/unions_of_this_type./people/marriage/location_of_ceremony	/m/013ksx
/m/084nh	/people/person/gender	/m/05zppz
/m/025sc50	/music/genre/artists	/m/01cwhp
/m/0484q	/celebrities/celebrity/sexual_relationships./celebrities/romantic_relationship/celebrity	/m/01w02sy
/m/01qhm_	/people/ethnicity/people	/m/0h953
/m/0k4fz	/film/film/language	/m/02h40lc
/m/09z2b7	/film/film/story_by	/m/0l99s
/m/04ztj	/people/marriage_union_type/unions_of_this_type./people/marriage/location_of_ceremony	/m/01n7q
/m/03bxh	/people/person/gender	/m/05zppz
/m/0487_	/sports/sports_team/roster./american_football/football_historical_roster_position/position_s	/m/04nfpk
/m/05k17c	/organization/role/leaders./organization/leadership/organization	/m/043q2z
/m/041rx	/people/ethnicity/people	/m/03gvpk
/m/02qgqt	/award/award_winner/awards_won./award/award_honor/award_winner	/m/015v3r
/m/098n5	/award/award_winner/awards_won./award/award_honor/award_winner	/m/08qvhv
/m/0sxns	/film/film/genre	/m/07s9rl0
/m/0ggbhy7	/film/film/produced_by	/m/0b13g7
/m/01hn_t	/tv/tv_program/languages	/m/02h40lc
/m/02js9p	/people/person/place_of_birth	/m/0h778
/m/0c3ybss	/film/film/release_date_s./film/film_regional_release_date/film_release_region	/m/06t2t
/m/01ztgm	/celebrities/celebrity/sexual_relationships./celebrities/romantic_relationship/celebrity	/m/01vs_v8
/m/0m5s5	/film/film/estimated_budget./measurement_unit/dated_money_value/currency	/m/09nqf
/m/02fm4d	/award/award_category/winners./award/award_honor/ceremony	/m/01mhwk
/m/024rgt	/award/award_nominee/award_nominations./award/award_nomination/nominated_for	/m/02qlp4
/m/01pr_j6	/music/artist/origin	/m/0f1_p
/m/0d7vtk	/film/film/language	/m/03_9r
/m/051zy_b	/film/film/cinematography	/m/06r_by
/m/04nfpk	/sports/sports_position/players./sports/sports_team_roster/team	/m/0ftf0f
/m/0d7wh	/people/ethnicity/people	/m/09d5d5
/m/05g3b	/sports/professional_sports_team/draft_picks./sports/sports_league_draft_pick/draft	/m/05vsb7
/m/02bh8z	/business/business_operation/industry	/m/04rlf
/m/0p_pd	/award/award_nominee/award_nominations./award/award_nomination/award_nominee	/m/039bp
/m/017g2y	/people/person/spouse_s./people/marriage/type_of_union	/m/04ztj
/m/0qjfl	/award/hall_of_fame/inductees./award/hall_of_fame_induction/inductee	/m/02l0xc
/m/024rbz	/film/film_distributor/films_distributed./film/film_film_distributor_relationship/film	/m/0bmfnjs
/m/04sylm	/education/educational_institution/students_graduates./education/education/student	/m/05_swj
/m/05218gr	/award/award_nominee/award_nominations./award/award_nomination/nominated_for	/m/0gl3hr
/m/07qg8v	/film/film/release_date_s./film/film_regional_release_date/film_release_region	/m/0h7x
/m/03q43g	/film/actor/film./film/performance/film	/m/03bx2lk
/m/07z542	/award/award_winner/awards_won./award/award_honor/award_winner	/m/01m15br
/m/0mn9x	/location/statistical_region/rent50_2./measurement_unit/dated_money_value/currency	/m/09nqf
/m/01g_bs	/music/genre/artists	/m/01v_pj6
/m/018417	/people/person/spouse_s./people/marriage/type_of_union	/m/04ztj
/m/07p__7	/government/legislative_session/members./government/government_position_held/district_represented	/m/0498y
/m/0fhnf	/location/location/adjoin_s./location/adjoining_relationship/adjoins	/m/01gpy4
/m/02_j1w	/sports/sports_position/players./sports/sports_team_roster/team	/m/03lb76
/m/030hcs	/base/schemastaging/person_extra/net_worth./measurement_unit/dated_money_value/currency	/m/09nqf
/m/0kvbl6	/film/film/other_crew./film/film_crew_gig/film_crew_role	/m/02r96rf
/m/02lw8j	/music/genre/artists	/m/011hdn
/m/015qyf	/people/person/gender	/m/05zppz
/m/051qvn	/soccer/football_team/current_roster./sports/sports_team_roster/position	/m/0dgrmp
/m/0ckrnn	/award/award_winning_work/awards_won./award/award_honor/award	/m/0gs96
/m/0f_y9	/people/person/profession	/m/0nbcg
/m/0k269	/award/award_nominee/award_nominations./award/award_nomination/award	/m/054ks3
/m/0645k5	/film/film/genre	/m/07s9rl0
/m/03b1sb	/film/film/genre	/m/0vgkd
/m/02g87m	/award/award_nominee/award_nominations./award/award_nomination/award	/m/05zvj3m
/m/02bqm0	/government/legislative_session/members./government/government_position_held/legislative_sessions	/m/032ft5
/m/06sfk6	/film/film/other_crew./film/film_crew_gig/film_crew_role	/m/0ch6mp2
/m/02825kb	/film/film/estimated_budget./measurement_unit/dated_money_value/currency	/m/09nqf
/m/0jt5zcn	/location/location/contains	/m/0ym17
/m/0b1mf	/location/capital_of_administrative_division/capital_of./location/administrative_division_capital_relationship/administrative_division	/m/0fhnf
/m/0f8l9c	/military/military_combatant/military_conflicts./military/military_combatant_group/combatants	/m/025ndl
/m/01d_4t	/people/person/profession	/m/0np9r
/m/0cp0ph6	/film/film/genre	/m/05p553
/m/03l6bs	/organization/non_profit_organization/registered_with./organization/non_profit_registration/registering_agency	/m/03z19
/m/027pfg	/film/film/release_date_s./film/film_regional_release_date/film_release_region	/m/03rk0
/m/02wxvtv	/people/person/spouse_s./people/marriage/type_of_union	/m/04ztj
/m/05p1tzf	/film/film/release_date_s./film/film_regional_release_date/film_release_region	/m/05qhw
/m/0175tv	/soccer/football_team/current_roster./soccer/football_roster_position/position	/m/0dgrmp
/m/0kpzy	/location/location/adjoin_s./location/adjoining_relationship/adjoins	/m/0d6lp
/m/02cqbx	/award/award_nominee/award_nominations./award/award_nomination/nominated_for	/m/0jsqk
/m/03fg0r	/award/award_nominee/award_nominations./award/award_nomination/award_nominee	/m/0m66w
/m/0fqjhm	/award/award_nominee/award_nominations./award/award_nomination/award_nominee	/m/02js9p
/m/02h40lc	/education/field_of_study/students_majoring./education/education/student	/m/02dh86
/m/01g3gq	/film/film/written_by	/m/04h68j
/m/010xjr	/award/award_nominee/award_nominations./award/award_nomination/award	/m/09sb52
/m/05vsxz	/film/actor/film./film/performance/film	/m/0fh2v5
/m/02ck7w	/award/award_winner/awards_won./award/award_honor/award_winner	/m/0154qm
/m/0l14j_	/music/performance_role/regular_performances./music/group_membership/group	/m/05crg7
/m/049fcd	/soccer/football_team/current_roster./sports/sports_team_roster/position	/m/02_j1w
/m/06z6r	/olympics/olympic_sport/athletes./olympics/olympic_athlete_affiliation/country	/m/05qkp
/m/01dzg0	/education/university/local_tuition./measurement_unit/dated_money_value/currency	/m/09nqf
/m/03mnn0	/film/film/genre	/m/04rlf
/m/01zkxv	/people/person/profession	/m/0cbd2
/m/0j3v	/people/person/employment_history./business/employment_tenure/company	/m/01stzp
/m/040njc	/award/award_category/nominees./award/award_nomination/nominated_for	/m/0b85mm
/m/04ztj	/people/marriage_union_type/unions_of_this_type./people/marriage/location_of_ceremony	/m/07tcs
/m/034fl9	/tv/tv_program/regular_cast./tv/regular_tv_appearance/actor	/m/01nrq5
/m/06wbm8q	/film/film/release_date_s./film/film_regional_release_date/film_release_region	/m/06c1y
/m/02qm5j	/music/genre/artists	/m/01vsqvs
/m/014g_s	/base/popstra/celebrity/friendship./base/popstra/friendship/participant	/m/0tc7
/m/01w524f	/people/person/religion	/m/0c8wxp
/m/0690ct	/soccer/football_team/current_roster./soccer/football_roster_position/position	/m/0dgrmp
/m/02jxkw	/award/award_winner/awards_won./award/award_honor/award_winner	/m/02r4qs
/m/01frpd	/organization/organization/headquarters./location/mailing_address/citytown	/m/030qb3t
/m/0h7x	/location/location/contains	/m/0fhp9
/m/0fpkhkz	/award/award_winning_work/awards_won./award/award_honor/award	/m/02rdxsh
/m/03jldb	/people/person/languages	/m/02h40lc
/m/01sgl	/olympics/olympic_sport/athletes./olympics/olympic_athlete_affiliation/country	/m/03rjj
/m/06sks6	/olympics/olympic_games/participating_countries	/m/06qd3
/m/06cv1	/people/person/profession	/m/0cbd2
/m/065z3_x	/film/film/language	/m/02h40lc
/m/01vdm0	/music/performance_role/track_performances./music/track_contribution/role	/m/03gvt
/m/016tb7	/people/person/places_lived./people/place_lived/location	/m/0k049
/m/02fm4d	/award/award_category/winners./award/award_honor/ceremony	/m/02cg41
/m/0ktpx	/film/film/written_by	/m/0gv5c
/m/03t0k1	/award/award_nominee/award_nominations./award/award_nomination/nominated_for	/m/0m313
/m/02_j1w	/sports/sports_position/players./sports/sports_team_roster/team	/m/0c02jh8
/m/07l50vn	/film/film/genre	/m/02n4kr
/m/01j7rd	/award/award_winner/awards_won./award/award_honor/award_winner	/m/05pzdk
/m/0bh8yn3	/film/film/release_date_s./film/film_regional_release_date/film_release_region	/m/03rk0
/m/0cq7tx	/film/film/produced_by	/m/0hsmh
/m/05842k	/music/performance_role/track_performances./music/track_contribution/role	/m/03gvt
/m/0gtvrv3	/film/film/release_date_s./film/film_regional_release_date/film_release_region	/m/07f1x
/m/01x0sy	/film/actor/dubbing_performances./film/dubbing_performance/language	/m/02h40lc
/m/02lyr4	/sports/sports_position/players./sports/sports_team_roster/team	/m/06x68
/m/05jjl	/award/award_winner/awards_won./award/award_honor/award_winner	/m/0b7xl8
/m/020_95	/award/award_nominee/award_nominations./award/award_nomination/award_nominee	/m/014gf8
/m/0xnvg	/people/ethnicity/people	/m/06cgy
/m/0m123	/tv/tv_program/languages	/m/02h40lc
/m/05n19y	/people/person/gender	/m/05zppz
/m/05r3qc	/film/film/other_crew./film/film_crew_gig/film_crew_role	/m/01pvkk
/m/02_j1w	/sports/sports_position/players./sports/sports_team_roster/team	/m/0420td
/m/01pbxb	/award/award_nominee/award_nominations./award/award_nomination/award	/m/054ks3
/m/05lb87	/award/award_nominee/award_nominations./award/award_nomination/award_nominee	/m/03zqc1
/m/0bkj86	/education/educational_degree/people_with_this_degree./education/education/institution	/m/07tl0
/m/09w1n	/olympics/olympic_sport/athletes./olympics/olympic_athlete_affiliation/country	/m/0chghy
/m/0gz6b6g	/film/film/other_crew./film/film_crew_gig/film_crew_role	/m/09zzb8
/m/07p12s	/film/film/other_crew./film/film_crew_gig/film_crew_role	/m/089g0h
/m/0gs96	/award/award_category/winners./award/award_honor/ceremony	/m/073hmq
/m/05n6sq	/film/film/genre	/m/07s9rl0
/m/0dcsx	/people/cause_of_death/people	/m/014zn0
/m/09qvms	/award/award_ceremony/awards_presented./award/award_honor/honored_for	/m/05sy_5
/m/09sb52	/award/award_category/winners./award/award_honor/award_winner	/m/03v3xp
/m/018n6m	/people/person/places_lived./people/place_lived/location	/m/0mn8t
/m/0ylvj	/education/educational_institution/students_graduates./education/education/major_field_of_study	/m/04rjg
/m/01gvpz	/award/award_winning_work/awards_won./award/award_honor/award_winner	/m/01wrcxr
/m/06cl2w	/film/actor/film./film/performance/film	/m/0b7l4x
/m/01l8t8	/education/educational_institution/students_graduates./education/education/major_field_of_study	/m/037mh8
/m/0cqhk0	/award/award_category/winners./award/award_honor/award_winner	/m/015c2f
/m/05q8pss	/award/award_category/nominees./award/award_nomination/nominated_for	/m/0n83s
/m/026036	/education/educational_institution/students_graduates./education/education/student	/m/03swmf
/m/0hsmh	/film/director/film	/m/0cq7tx
/m/01_x6v	/people/person/languages	/m/03_9r
/m/02vtnf	/award/award_nominee/award_nominations./award/award_nomination/nominated_for	/m/063hp4
/m/02zfdp	/award/award_nominee/award_nominations./award/award_nomination/award_nominee	/m/02rf1y
/m/0b76d_m	/film/film/language	/m/02h40lc
/m/02yvct	/film/film/release_date_s./film/film_regional_release_date/film_release_region	/m/016wzw
/m/02x8n1n	/award/award_category/nominees./award/award_nomination/nominated_for	/m/0gz6b6g
/m/02_1sj	/film/film/featured_film_locations	/m/0d6lp
/m/0mkg	/music/performance_role/track_performances./music/track_contribution/role	/m/0l15bq
/m/019vhk	/film/film/written_by	/m/07s93v
/m/062zm5h	/film/film/other_crew./film/film_crew_gig/film_crew_role	/m/02r96rf
/m/0509bl	/people/person/place_of_birth	/m/017j4q
/m/05h43ls	/award/award_winning_work/awards_won./award/award_honor/award_winner	/m/070j61
/m/03kbb8	/people/person/places_lived./people/place_lived/location	/m/030qb3t
/m/01ym8l	/business/business_operation/operating_income./measurement_unit/dated_money_value/currency	/m/09nqf
/m/030znt	/award/award_nominee/award_nominations./award/award_nomination/award	/m/0cqhk0
/m/0g26h	/education/field_of_study/students_majoring./education/education/student	/m/0tc7
/m/0pgjm	/music/group_member/membership./music/group_membership/role	/m/028tv0
/m/0gyh2wm	/film/film/release_date_s./film/film_regional_release_date/film_release_region	/m/015fr
/m/02qyntr	/award/award_category/nominees./award/award_nomination/nominated_for	/m/0llcx
/m/01v3rb	/organization/organization/headquarters./location/mailing_address/citytown	/m/07dfk
/m/0l6qt	/award/award_nominee/award_nominations./award/award_nomination/nominated_for	/m/016z7s
/m/0x335	/base/biblioness/bibs_location/state	/m/050l8
/m/010xjr	/people/person/gender	/m/05zppz
/m/03cv_gy	/tv/tv_program/languages	/m/02h40lc
/m/017yxq	/people/person/profession	/m/0dxtg
/m/01w1kyf	/people/person/spouse_s./people/marriage/type_of_union	/m/04ztj
/m/04w391	/award/award_nominee/award_nominations./award/award_nomination/nominated_for	/m/03ct7jd
/m/057176	/award/award_nominee/award_nominations./award/award_nomination/award_nominee	/m/036hf4
/m/0wr_s	/location/location/time_zones	/m/02fqwt
/m/0k269	/film/actor/film./film/performance/film	/m/0dfw0
/m/01q940	/music/record_label/artist	/m/01t8399
/m/0498y	/location/statistical_region/religions./location/religion_percentage/religion	/m/01lp8
/m/09sdmz	/award/award_category/nominees./award/award_nomination/nominated_for	/m/0bdjd
/m/0f25w9	/food/food/nutrients./food/nutrition_fact/nutrient	/m/0f4hc
/m/0jhn7	/user/jg/default_domain/olympic_games/sports	/m/0d1t3
/m/01m2n1	/base/biblioness/bibs_location/state	/m/05k7sb
/m/017jd9	/film/film/release_date_s./film/film_regional_release_date/film_release_region	/m/05b4w
/m/03gvt	/music/performance_role/track_performances./music/track_contribution/role	/m/0mkg
/m/030hbp	/people/person/places_lived./people/place_lived/location	/m/06yxd
/m/04l58n	/sports/sports_team/colors	/m/038hg
/m/01svq8	/people/person/gender	/m/05zppz
/m/01vttb9	/award/award_nominee/award_nominations./award/award_nomination/award_nominee	/m/016jll
/m/0gzlb9	/film/film/other_crew./film/film_crew_gig/film_crew_role	/m/09zzb8
/m/0x67	/people/ethnicity/people	/m/01wrcxr
/m/09qvc0	/award/award_category/nominees./award/award_nomination/nominated_for	/m/05p9_ql
/m/018ljb	/user/jg/default_domain/olympic_games/sports	/m/0bynt
/m/08y7b9	/film/actor/film./film/performance/film	/m/01p3ty
/m/023jq1	/award/award_winner/awards_won./award/award_honor/award_winner	/m/02c0mv
/m/0f_nbyh	/award/award_category/nominees./award/award_nomination/nominated_for	/m/0cc5qkt
/m/01jft4	/film/film/other_crew./film/film_crew_gig/film_crew_role	/m/02r96rf
/m/01s3vk	/film/film/other_crew./film/film_crew_gig/film_crew_role	/m/01vx2h
/m/027hnjh	/award/award_winner/awards_won./award/award_honor/award_winner	/m/02q5xsx
/m/01clyb	/education/educational_institution/colors	/m/01g5v
/m/02py7pj	/award/award_category/winners./award/award_honor/ceremony	/m/09qvms
/m/0466s8n	/film/film/other_crew./film/film_crew_gig/film_crew_role	/m/02r96rf
/m/0bj25	/award/award_winning_work/awards_won./award/award_honor/award_winner	/m/0h1m9
/m/0fxky3	/people/person/gender	/m/05zppz
/m/0171lb	/people/deceased_person/place_of_death	/m/0k049
/m/012gx2	/people/person/spouse_s./people/marriage/type_of_union	/m/04ztj
/m/04t2l2	/people/person/religion	/m/0c8wxp
/m/073hhn	/soccer/football_team/current_roster./sports/sports_team_roster/position	/m/02_j1w
/m/01mhwk	/award/award_ceremony/awards_presented./award/award_honor/award_winner	/m/0jbp0
/m/0d7vtk	/tv/tv_program/languages	/m/02h40lc
/m/04gc65	/film/actor/film./film/performance/film	/m/01j5ql
/m/087pfc	/film/film/release_date_s./film/film_regional_release_date/film_release_region	/m/0d0vqn
/m/04gc65	/film/actor/film./film/performance/film	/m/01718w
/m/0vrmb	/base/biblioness/bibs_location/state	/m/04rrx
/m/04mx__	/people/person/spouse_s./people/marriage/type_of_union	/m/04ztj
/m/0bpm4yw	/film/film/release_date_s./film/film_regional_release_date/film_release_region	/m/04hqz
/m/05fjf	/location/location/contains	/m/0cvyp
/m/02kxbwx	/award/award_nominee/award_nominations./award/award_nomination/award	/m/0f_nbyh
/m/041rx	/people/ethnicity/people	/m/034q3l
/m/01gp_x	/award/award_nominee/award_nominations./award/award_nomination/nominated_for	/m/07g9f
/m/019n8z	/olympics/olympic_games/sports	/m/09w1n
/m/0gffmn8	/film/film/release_date_s./film/film_regional_release_date/film_release_region	/m/016wzw
/m/04q24zv	/film/film/genre	/m/02l7c8
/m/011lpr	/people/person/place_of_birth	/m/06_kh
/m/01hcj2	/people/person/languages	/m/02h40lc
/m/0488g9	/people/person/profession	/m/0196pc
/m/04dn09n	/award/award_category/nominees./award/award_nomination/nominated_for	/m/04vr_f
/m/02x02kb	/people/person/nationality	/m/03rk0
/m/07s9rl0	/media_common/netflix_genre/titles	/m/0170th
/m/06pj8	/award/award_nominee/award_nominations./award/award_nomination/award_nominee	/m/09gb9xh
/m/01wp_jm	/people/deceased_person/place_of_death	/m/0ftvg
/m/02d02	/sports/sports_team/roster./baseball/baseball_roster_position/position	/m/02wszf
/m/0gkz15s	/film/film/release_date_s./film/film_regional_release_date/film_release_region	/m/03gj2
/m/0gz6b6g	/film/film/release_date_s./film/film_regional_release_date/film_release_region	/m/03rjj
/m/0h1nt	/award/award_winner/awards_won./award/award_honor/award_winner	/m/01gvr1
/m/01k47c	/people/person/profession	/m/01c72t
/m/0dth6b	/award/award_ceremony/awards_presented./award/award_honor/award_winner	/m/079hvk
/m/011yxg	/award/award_winning_work/awards_won./award/award_honor/award_winner	/m/016tt2
/m/0n5dt	/location/location/time_zones	/m/02hcv8
/m/041rx	/people/ethnicity/people	/m/01pq5j7
/m/054ky1	/award/award_category/winners./award/award_honor/award_winner	/m/01b9ck
/m/02kwcj	/tv/tv_program/regular_cast./tv/regular_tv_appearance/actor	/m/05bp8g
/m/04kxsb	/award/award_category/nominees./award/award_nomination/nominated_for	/m/016ks5
/m/06mmb	/award/award_nominee/award_nominations./award/award_nomination/award_nominee	/m/0m2wm
/m/028c_8	/sports/sports_position/players./sports/sports_team_roster/team	/m/04b5l3
/m/01kvqc	/people/person/spouse_s./people/marriage/type_of_union	/m/04ztj
/m/0fpkhkz	/film/film/release_date_s./film/film_regional_release_date/film_release_region	/m/0jgx
/m/037n97	/music/genre/artists	/m/01k_mc
/m/07fvf1	/award/award_nominee/award_nominations./award/award_nomination/award_nominee	/m/03xp8d5
/m/02778yp	/people/person/spouse_s./people/marriage/type_of_union	/m/04ztj
/m/016tb7	/award/award_nominee/award_nominations./award/award_nomination/award_nominee	/m/06hhrs
/m/03gwpw2	/award/award_ceremony/awards_presented./award/award_honor/award_winner	/m/0276jmv
/m/0g293	/music/genre/artists	/m/015882
/m/01v9l67	/award/award_nominee/award_nominations./award/award_nomination/award	/m/09sb52
/m/0292qb	/film/film/other_crew./film/film_crew_gig/film_crew_role	/m/01pvkk
/m/05qbckf	/film/film/release_date_s./film/film_regional_release_date/film_release_region	/m/04hqz
/m/09px1w	/people/person/spouse_s./people/marriage/type_of_union	/m/04ztj
/m/0322yj	/film/film/other_crew./film/film_crew_gig/film_crew_role	/m/09vw2b7
/m/02qyv3h	/film/film/release_date_s./film/film_regional_release_date/film_release_region	/m/06c1y
/m/01pgzn_	/award/award_nominee/award_nominations./award/award_nomination/award_nominee	/m/08swgx
/m/026p_bs	/film/film/genre	/m/07s9rl0
/m/05567m	/film/film/film_format	/m/0cj16
/m/0k2cb	/film/film/language	/m/02h40lc
/m/0prfz	/award/award_nominee/award_nominations./award/award_nomination/award	/m/0bs0bh
/m/030qb3t	/base/popstra/location/vacationers./base/popstra/vacation_choice/vacationer	/m/0gy6z9
/m/040njc	/award/award_category/nominees./award/award_nomination/nominated_for	/m/05sy_5
/m/02js9p	/people/person/places_lived./people/place_lived/location	/m/030qb3t
/m/012v9y	/people/deceased_person/place_of_death	/m/06_kh
/m/0n5dt	/location/location/adjoin_s./location/adjoining_relationship/adjoins	/m/0n5fl
/m/03_2y	/award/award_winner/awards_won./award/award_honor/award_winner	/m/0pksh
/m/02wtp6	/film/film/release_date_s./film/film_regional_release_date/film_release_region	/m/0chghy
/m/0d4fqn	/award/award_winner/awards_won./award/award_honor/award_winner	/m/02bvt
/m/01j5ql	/film/film/other_crew./film/film_crew_gig/film_crew_role	/m/0ch6mp2
/m/015v3r	/film/actor/film./film/performance/film	/m/060__7
/m/07cn2c	/film/actor/dubbing_performances./film/dubbing_performance/language	/m/02h40lc
/m/01m1_t	/location/hud_county_place/county	/m/0m2gk
/m/0d0vqn	/location/statistical_region/gdp_nominal_per_capita./measurement_unit/dated_money_value/currency	/m/09nqf
/m/0jhz_	/location/us_county/county_seat	/m/0ggh3
/m/031786	/film/film/music	/m/08c9b0
/m/0bynt	/olympics/olympic_sport/athletes./olympics/olympic_athlete_affiliation/country	/m/06v36
/m/01c9d1	/award/award_category/winners./award/award_honor/ceremony	/m/02cg41
/m/01_qp_	/music/genre/parent_genre	/m/0y3_8
/m/02pl5bx	/music/genre/artists	/m/01yzl2
/m/05nrkb	/education/educational_institution/students_graduates./education/education/student	/m/032wdd
/m/05gm16l	/education/educational_institution/colors	/m/038hg
/m/0642ykh	/film/film/story_by	/m/01wd02c
/m/02dlh2	/music/performance_role/regular_performances./music/group_membership/role	/m/02pprs
/m/02zfdp	/people/person/profession	/m/0np9r
/m/0gy6z9	/base/popstra/celebrity/dated./base/popstra/dated/participant	/m/01pw2f1
/m/02v3yy	/award/award_nominee/award_nominations./award/award_nomination/award_nominee	/m/01n8gr
/m/01f2f8	/people/person/place_of_birth	/m/06c62
/m/073hhn	/soccer/football_team/current_roster./soccer/football_roster_position/position	/m/0dgrmp
/m/0g48m4	/people/ethnicity/geographic_distribution	/m/05fjf
/m/0127m7	/award/award_nominee/award_nominations./award/award_nomination/award_nominee	/m/016tw3
/m/09myny	/award/award_nominee/award_nominations./award/award_nomination/nominated_for	/m/0gcrg
/m/0m_mm	/film/film/produced_by	/m/012vct
/m/07s8r0	/award/award_nominee/award_nominations./award/award_nomination/award_nominee	/m/02zfdp
/m/0k9j_	/people/person/gender	/m/05zppz
/m/04dqdk	/award/award_winner/awards_won./award/award_honor/award_winner	/m/028qdb
/m/0crx5w	/award/award_nominee/award_nominations./award/award_nomination/award_nominee	/m/03wh8kl
/m/06w6_	/people/person/spouse_s./people/marriage/location_of_ceremony	/m/0b90_r
/m/05m_8	/sports/sports_team/roster./baseball/baseball_roster_position/position	/m/02lyr4
/m/0fhpv4	/award/award_category/nominees./award/award_nomination/nominated_for	/m/0cc5qkt
/m/02c8d7	/music/genre/artists	/m/016ppr
/m/03xq0f	/film/film_distributor/films_distributed./film/film_film_distributor_relationship/film	/m/05c9zr
/m/0y3_8	/music/genre/artists	/m/01271h
/m/0f8l9c	/location/country/second_level_divisions	/m/05qtj
/m/0b_dy	/award/award_nominee/award_nominations./award/award_nomination/nominated_for	/m/027pfg
/m/065ym0c	/film/film/release_date_s./film/film_regional_release_date/film_release_region	/m/06t2t
/m/014mlp	/education/educational_degree/people_with_this_degree./education/education/institution	/m/0221g_
/m/014lc_	/film/film/language	/m/02h40lc
/m/05m9f9	/award/award_nominee/award_nominations./award/award_nomination/award_nominee	/m/04sry
/m/0swbd	/olympics/olympic_games/sports	/m/09w1n
/m/0q9b0	/film/film/production_companies	/m/0283xx2
/m/0gs96	/award/award_category/winners./award/award_honor/ceremony	/m/0bzmt8
/m/02py7pj	/award/award_category/winners./award/award_honor/award_winner	/m/01bj6y
/m/03ln8b	/tv/tv_program/languages	/m/02h40lc
/m/012mzw	/education/educational_institution/students_graduates./education/education/major_field_of_study	/m/03nfmq
/m/03jht	/award/award_nominee/award_nominations./award/award_nomination/award	/m/0ddd9
/m/032s66	/people/cause_of_death/people	/m/0484q
/m/012zng	/music/artist/origin	/m/01c40n
/m/087vz	/location/location/contains	/m/07bbc
/m/01vdm0	/music/performance_role/regular_performances./music/group_membership/role	/m/0l14md
/m/0l14gg	/music/genre/artists	/m/01mkn_d
/m/01pcj4	/education/educational_institution/students_graduates./education/education/student	/m/02p2zq
/m/052hl	/people/person/gender	/m/05zppz
/m/029cpw	/people/person/gender	/m/05zppz
/m/06b3g4	/film/actor/film./film/performance/film	/m/04b2qn
/m/0l14md	/music/performance_role/regular_performances./music/group_membership/group	/m/03d9d6
/m/08052t3	/film/film/genre	/m/05p553
/m/03x3wf	/award/award_category/winners./award/award_honor/award_winner	/m/01vsy3q
/m/0blbxk	/award/award_nominee/award_nominations./award/award_nomination/award_nominee	/m/042xrr
/m/01_x6v	/award/award_winner/awards_won./award/award_honor/award_winner	/m/01_x6d
/m/0194xc	/people/person/spouse_s./people/marriage/type_of_union	/m/04ztj
/m/05_5rjx	/film/film/other_crew./film/film_crew_gig/film_crew_role	/m/0ch6mp2
/m/01s3vk	/film/film/story_by	/m/07rd7
/m/0fc2c	/location/statistical_region/rent50_2./measurement_unit/dated_money_value/currency	/m/09nqf
/m/015fr	/olympics/olympic_participating_country/medals_won./olympics/olympic_medal_honor/olympics	/m/0lbd9
/m/02tv80	/film/actor/film./film/performance/film	/m/01jmyj
/m/0fby2t	/people/person/gender	/m/05zppz
/m/01ckhj	/people/person/nationality	/m/0ctw_b
/m/0661ql3	/film/film/produced_by	/m/0184dt
/m/021vwt	/people/person/gender	/m/05zppz
/m/0bh8drv	/film/film/production_companies	/m/024rbz
/m/0168t	/location/location/time_zones	/m/042g7t
/m/014v6f	/film/actor/film./film/performance/film	/m/0cz_ym
/m/05h43ls	/film/film/other_crew./film/film_crew_gig/film_crew_role	/m/01vx2h
/m/06rmdr	/film/film/genre	/m/05p553
/m/03ktjq	/award/award_nominee/award_nominations./award/award_nomination/award_nominee	/m/016tt2
/m/03cs_xw	/people/person/gender	/m/05zppz
/m/0dc_ms	/film/film/release_date_s./film/film_regional_release_date/film_release_region	/m/06c1y
/m/07f1x	/military/military_combatant/military_conflicts./military/military_combatant_group/combatants	/m/06f32
/m/02mx98	/people/person/gender	/m/05zppz
/m/09byk	/people/person/spouse_s./people/marriage/type_of_union	/m/04ztj
/m/01v1d8	/music/performance_role/track_performances./music/track_contribution/role	/m/01vdm0
/m/02_j1w	/sports/sports_position/players./sports/sports_team_roster/team	/m/075q_
/m/01wyzyl	/people/person/profession	/m/0np9r
/m/09w1n	/olympics/olympic_sport/athletes./olympics/olympic_athlete_affiliation/country	/m/0jgx
/m/0bth54	/film/film/other_crew./film/film_crew_gig/film_crew_role	/m/0d2b38
/m/0gkvb7	/award/award_category/winners./award/award_honor/ceremony	/m/03nnm4t
/m/09w1n	/olympics/olympic_sport/athletes./olympics/olympic_athlete_affiliation/country	/m/0b90_r
/m/0407yj_	/film/film/language	/m/064_8sq
/m/0xnvg	/people/ethnicity/people	/m/02jyhv
/m/01vsl3_	/award/award_nominee/award_nominations./award/award_nomination/award	/m/01bgqh
/m/0tz01	/location/statistical_region/rent50_2./measurement_unit/dated_money_value/currency	/m/09nqf
/m/02zj61	/award/award_nominee/award_nominations./award/award_nomination/award	/m/054ks3
/m/0bm02	/music/performance_role/track_performances./music/track_contribution/role	/m/0l14qv
/m/02nt3d	/film/film/genre	/m/05p553
/m/06ztvyx	/film/film/genre	/m/01zhp
/m/0127xk	/award/award_nominee/award_nominations./award/award_nomination/award	/m/0bp_b2
/m/01g4bk	/people/person/profession	/m/05z96
/m/0184jw	/film/director/film	/m/02q56mk
/m/014mlp	/education/educational_degree/people_with_this_degree./education/education/institution	/m/03x23q
/m/014mlp	/education/educational_degree/people_with_this_degree./education/education/institution	/m/01j_9c
/m/09dv0sz	/award/award_winner/awards_won./award/award_honor/award_winner	/m/0fqjhm
/m/083chw	/award/award_winner/awards_won./award/award_honor/award_winner	/m/03_l8m
/m/02cqbx	/people/deceased_person/place_of_death	/m/030qb3t
/m/07l8x	/sports/sports_team/roster./baseball/baseball_roster_position/position	/m/028c_8
/m/04rg6	/people/person/gender	/m/05zppz
/m/01v9l67	/award/award_winner/awards_won./award/award_honor/award_winner	/m/09wj5
/m/02klny	/education/university/domestic_tuition./measurement_unit/dated_money_value/currency	/m/09nqf
/m/09qj50	/award/award_category/winners./award/award_honor/award_winner	/m/04mhxx
/m/0yxl	/people/person/profession	/m/0196pc
/m/01sdzg	/sports/sports_position/players./sports/sports_team_roster/team	/m/07l8x
/m/0bq8tmw	/film/film/produced_by	/m/01qbjg
/m/0d07j8	/people/person/place_of_birth	/m/030qb3t
/m/02krdz	/film/film/language	/m/02h40lc
/m/019bk0	/award/award_ceremony/awards_presented./award/award_honor/award_winner	/m/018ndc
/m/02l101	/award/award_nominee/award_nominations./award/award_nomination/award	/m/0bfvd4
/m/047gpsd	/film/film/featured_film_locations	/m/030qb3t
/m/027xx3	/education/university/domestic_tuition./measurement_unit/dated_money_value/currency	/m/09nqf
/m/01lyv	/music/genre/artists	/m/017xm3
/m/0cjdk	/tv/tv_network/programs./tv/tv_network_duration/program	/m/07g9f
/m/0gcpc	/film/film/cinematography	/m/087yty
/m/0cc97st	/film/film/release_date_s./film/film_regional_release_date/film_release_region	/m/0chghy
/m/0pgjm	/award/award_winner/awards_won./award/award_honor/award_winner	/m/03qd_
/m/04dqdk	/people/person/profession	/m/0nbcg
/m/0fpzt5	/people/person/places_lived./people/place_lived/location	/m/0qpn9
/m/02ywhz	/award/award_ceremony/awards_presented./award/award_honor/honored_for	/m/0170xl
/m/02zbjwr	/people/person/gender	/m/05zppz
/m/0408np	/people/person/gender	/m/05zppz
/m/045bg	/influence/influence_node/influenced_by	/m/0j3v
/m/01q415	/award/award_nominee/award_nominations./award/award_nomination/award	/m/04dn09n
/m/01vdm0	/music/performance_role/track_performances./music/track_contribution/role	/m/02sgy
/m/011ywj	/film/film/genre	/m/0j5nm
/m/01f7gh	/film/film/language	/m/02h40lc
/m/0303jw	/soccer/football_team/current_roster./sports/sports_team_roster/position	/m/0dgrmp
/m/02nx2k	/film/film/language	/m/02h40lc
/m/02s6sh	/people/person/gender	/m/05zppz
/m/05_5rjx	/film/film/language	/m/064_8sq
/m/014mlp	/education/educational_degree/people_with_this_degree./education/education/institution	/m/018m5q
/m/07nxnw	/film/film/language	/m/02h40lc
/m/02z5x7l	/film/film/genre	/m/0jxy
/m/05pdh86	/film/film/release_date_s./film/film_regional_release_date/film_release_region	/m/015fr
/m/0myk8	/music/performance_role/regular_performances./music/group_membership/role	/m/014zz1
/m/071t0	/olympics/olympic_sport/athletes./olympics/olympic_athlete_affiliation/country	/m/0h3y
/m/0dgrmp	/sports/sports_position/players./sports/sports_team_roster/team	/m/01kj5h
/m/03_wpf	/award/award_nominee/award_nominations./award/award_nomination/award_nominee	/m/07f3xb
/m/02g87m	/people/person/languages	/m/02h40lc
/m/01gst9	/government/legislative_session/members./government/government_position_held/district_represented	/m/059f4
/m/02d413	/film/film/genre	/m/07s9rl0
/m/07bx6	/film/film/featured_film_locations	/m/01c40n
/m/02n4kr	/media_common/netflix_genre/titles	/m/0c_j9x
/m/0bzm__	/award/award_ceremony/awards_presented./award/award_honor/honored_for	/m/0sxgv
/m/0m66w	/people/person/spouse_s./people/marriage/type_of_union	/m/04ztj
/m/06h7l7	/people/person/profession	/m/0np9r
/m/0f8l9c	/location/location/adjoin_s./location/adjoining_relationship/adjoins	/m/04g61
/m/01dhmw	/influence/influence_node/influenced_by	/m/09dt7
/m/02fgdx	/business/business_operation/assets./measurement_unit/dated_money_value/currency	/m/09nqf
/m/09n4nb	/award/award_ceremony/awards_presented./award/award_honor/award_winner	/m/02r4qs
/m/02645b	/people/person/profession	/m/0dxtg
/m/013yq	/travel/travel_destination/climate./travel/travel_destination_monthly_climate/month	/m/04wzr
/m/083shs	/film/film/other_crew./film/film_crew_gig/film_crew_role	/m/09vw2b7
/m/0h63gl9	/film/film/other_crew./film/film_crew_gig/film_crew_role	/m/0ch6mp2
/m/0j2jr	/soccer/football_team/current_roster./soccer/football_roster_position/position	/m/02_j1w
/m/0ckrnn	/film/film/music	/m/012201
/m/07nv3_	/people/person/spouse_s./people/marriage/type_of_union	/m/04ztj
/m/07hwkr	/people/ethnicity/people	/m/018zvb
/m/023l9y	/music/artist/track_contributions./music/track_contribution/role	/m/01vdm0
/m/0by17xn	/film/film/release_date_s./film/film_regional_release_date/film_release_region	/m/0b90_r
/m/05qhw	/location/location/contains	/m/0mzg2
/m/0l3h	/location/statistical_region/religions./location/religion_percentage/religion	/m/0c8wxp
/m/09qvc0	/award/award_category/category_of	/m/0gcf2r
/m/071xj	/people/person/places_lived./people/place_lived/location	/m/0cvw9
/m/02t_h3	/film/film/language	/m/02h40lc
/m/02dwj	/film/film/language	/m/02h40lc
/m/014mlp	/education/educational_degree/people_with_this_degree./education/education/institution	/m/0dplh
/m/02hwww	/education/educational_institution/students_graduates./education/education/student	/m/050llt
/m/07kc_	/music/performance_role/regular_performances./music/group_membership/role	/m/0l14qv
/m/02hsgn	/award/award_nominee/award_nominations./award/award_nomination/award	/m/0bdwqv
/m/02q0v8n	/film/film/other_crew./film/film_crew_gig/film_crew_role	/m/09vw2b7
/m/045n3p	/people/person/nationality	/m/03rk0
/m/0lbfv	/organization/organization/headquarters./location/mailing_address/citytown	/m/052bw
/m/03jqfx	/base/culturalevent/event/entity_involved	/m/025ndl
/m/0fpzt5	/award/award_nominee/award_nominations./award/award_nomination/award	/m/0262zm
/m/09f0bj	/award/award_winner/awards_won./award/award_honor/award_winner	/m/06czyr
/m/0789_m	/award/award_category/winners./award/award_honor/award_winner	/m/03swmf
/m/01ckcd	/award/award_category/winners./award/award_honor/award_winner	/m/01vvycq
/m/05qbckf	/film/film/release_date_s./film/film_regional_release_date/film_release_region	/m/0d0vqn
/m/0h3mh3q	/award/award_winning_work/awards_won./award/award_honor/award_winner	/m/0hsn_
/m/024mpp	/film/film/release_date_s./film/film_regional_release_date/film_release_region	/m/03rjj
/m/01trf3	/award/award_nominee/award_nominations./award/award_nomination/award	/m/0h53c_5
/m/0tygl	/location/location/time_zones	/m/02hcv8
/m/060j8b	/people/person/religion	/m/0c8wxp
/m/01679d	/music/performance_role/track_performances./music/track_contribution/role	/m/05842k
/m/0mrq3	/location/statistical_region/rent50_2./measurement_unit/dated_money_value/currency	/m/09nqf
/m/0f0kz	/award/award_nominee/award_nominations./award/award_nomination/award_nominee	/m/02bfmn
/m/017dtf	/tv/tv_program/genre	/m/07s9rl0
/m/05lb30	/award/award_winner/awards_won./award/award_honor/award_winner	/m/05lb65
/m/04ztj	/people/marriage_union_type/unions_of_this_type./people/marriage/location_of_ceremony	/m/0fk98
/m/03txms	/government/politician/government_positions_held./government/government_position_held/jurisdiction_of_office	/m/0n5gq
/m/01jq4b	/education/university/local_tuition./measurement_unit/dated_money_value/currency	/m/09nqf
/m/0hdf8	/music/genre/artists	/m/02ndj5
/m/06s7rd	/base/schemastaging/person_extra/net_worth./measurement_unit/dated_money_value/currency	/m/09nqf
/m/0l14qv	/music/performance_role/track_performances./music/track_contribution/role	/m/0jtg0
/m/0nm6z	/location/location/adjoin_s./location/adjoining_relationship/adjoins	/m/0nm9h
/m/07q0g5	/award/award_nominee/award_nominations./award/award_nomination/award_nominee	/m/0276jmv
/m/02h30z	/education/university/local_tuition./measurement_unit/dated_money_value/currency	/m/09nqf
/m/02v703	/award/award_category/winners./award/award_honor/award_winner	/m/02rxbmt
/m/05qhw	/military/military_combatant/military_conflicts./military/military_combatant_group/combatants	/m/04g61
/m/04ztj	/people/marriage_union_type/unions_of_this_type./people/marriage/location_of_ceremony	/m/0dv9v
/m/08c6k9	/film/film/language	/m/02h40lc
/m/016wzw	/location/statistical_region/gni_per_capita_in_ppp_dollars./measurement_unit/dated_money_value/currency	/m/09nqf
/m/027r8p	/award/award_nominee/award_nominations./award/award_nomination/award_nominee	/m/0210hf
/m/0cn68	/people/ethnicity/people	/m/02qjj7
/m/0m6x4	/award/award_nominee/award_nominations./award/award_nomination/award	/m/0bfvw2
/m/04dn09n	/award/award_category/nominees./award/award_nomination/nominated_for	/m/07cw4
/m/03ts0c	/people/ethnicity/people	/m/0cbkc
/m/02rxbmt	/people/person/spouse_s./people/marriage/type_of_union	/m/04ztj
/m/02__x	/sports/sports_team/roster./baseball/baseball_roster_position/position	/m/01z9v6
/m/0778p	/organization/organization/headquarters./location/mailing_address/citytown	/m/0d9jr
/m/0134pk	/award/award_nominee/award_nominations./award/award_nomination/award	/m/01ckcd
/m/02yvct	/film/film/country	/m/0f8l9c
/m/05bnq3j	/award/award_nominee/award_nominations./award/award_nomination/award_nominee	/m/05pzdk
/m/0266bd5	/sports/sports_team/colors	/m/038hg
/m/0cfywh	/people/person/spouse_s./people/marriage/type_of_union	/m/04ztj
/m/02_j1w	/sports/sports_position/players./sports/sports_team_roster/team	/m/02029f
/m/0227vl	/base/popstra/celebrity/friendship./base/popstra/friendship/participant	/m/01w02sy
/m/029q_y	/tv/tv_writer/tv_programs./tv/tv_program_writer_relationship/tv_program	/m/01f3p_
/m/0b_ljy	/soccer/football_team/current_roster./soccer/football_roster_position/position	/m/02_j1w
/m/01k2wn	/education/educational_institution/students_graduates./education/education/student	/m/03cs_z7
/m/0g293	/music/genre/artists	/m/02ndj5
/m/03hy3g	/people/person/gender	/m/05zppz
/m/03b12	/location/location/time_zones	/m/02fqwt
/m/03j70t	/soccer/football_team/current_roster./sports/sports_team_roster/position	/m/0dgrmp
/m/02ln1	/influence/influence_node/influenced_by	/m/05qmj
/m/0pksh	/film/actor/film./film/performance/film	/m/0gl02yg
/m/040_t	/influence/influence_node/influenced_by	/m/081k8
/m/0crvfq	/award/award_nominee/award_nominations./award/award_nomination/award	/m/09sb52
/m/02qgqt	/award/award_winner/awards_won./award/award_honor/award_winner	/m/05k2s_
/m/018grr	/award/award_nominee/award_nominations./award/award_nomination/nominated_for	/m/07tw_b
/m/07bzz7	/film/film/music	/m/01vsl3_
/m/05842k	/music/performance_role/track_performances./music/track_contribution/role	/m/03qlv7
/m/05567m	/film/film/genre	/m/05p553
/m/0f5xn	/people/person/places_lived./people/place_lived/location	/m/0k049
/m/05z55	/food/food/nutrients./food/nutrition_fact/nutrient	/m/0f4hc
/m/026mmy	/award/award_category/winners./award/award_honor/award_winner	/m/0140t7
/m/02p65p	/award/award_nominee/award_nominations./award/award_nomination/award_nominee	/m/06g2d1
/m/07ym0	/people/person/profession	/m/05z96
/m/018ctl	/olympics/olympic_games/participating_countries	/m/0jgx
/m/02hp6p	/organization/endowed_organization/endowment./measurement_unit/dated_money_value/currency	/m/09nqf
/m/0gcpc	/film/film/music	/m/01jpmpv
/m/05d49	/location/location/time_zones	/m/0gsrz4
/m/03yj_0n	/award/award_nominee/award_nominations./award/award_nomination/award_nominee	/m/06cgy
/m/030_1m	/film/film_distributor/films_distributed./film/film_film_distributor_relationship/film	/m/03wj4r8
/m/02q7fl9	/film/film/genre	/m/07s9rl0
/m/012yc	/music/genre/artists	/m/01271h
/m/02ylg6	/film/film/release_date_s./film/film_regional_release_date/film_release_region	/m/0154j
/m/029ql	/award/award_winner/awards_won./award/award_honor/award_winner	/m/015dcj
/m/019z7q	/film/director/film	/m/03cvwkr
/m/030znt	/award/award_winner/awards_won./award/award_honor/award_winner	/m/03zqc1
/m/014mlp	/education/educational_degree/people_with_this_degree./education/education/institution	/m/0ylvj
/m/07y9ts	/award/award_ceremony/awards_presented./award/award_honor/award_winner	/m/09_99w
/m/06rzwx	/film/film/release_date_s./film/film_regional_release_date/film_release_region	/m/0d0vqn
/m/02rf1y	/award/award_nominee/award_nominations./award/award_nomination/award_nominee	/m/05th8t
/m/08qz1l	/military/military_conflict/combatants./military/military_combatant_group/combatants	/m/02psqkz
/m/01chc7	/award/award_nominee/award_nominations./award/award_nomination/award_nominee	/m/02bj6k
/m/01gg59	/people/person/spouse_s./people/marriage/type_of_union	/m/04ztj
/m/02581q	/award/award_category/category_of	/m/0c4ys
/m/01dy7j	/award/award_nominee/award_nominations./award/award_nomination/award_nominee	/m/01z7_f
/m/01rxw	/location/country/form_of_government	/m/06cx9
/m/02lf1j	/film/actor/film./film/performance/film	/m/0sxgv
/m/01wp_jm	/influence/influence_node/influenced_by	/m/014z8v
/m/013fn	/tv/tv_network/programs./tv/tv_network_duration/program	/m/01hn_t
/m/013zdg	/education/educational_degree/people_with_this_degree./education/education/institution	/m/0217m9
/m/06x68	/sports/professional_sports_team/draft_picks./sports/sports_league_draft_pick/school	/m/037njl
/m/0fq7dv_	/film/film/release_date_s./film/film_regional_release_date/film_release_region	/m/0154j
/m/015fs3	/education/university/local_tuition./measurement_unit/dated_money_value/currency	/m/09nqf
/m/01kvqc	/music/artist/track_contributions./music/track_contribution/role	/m/03qlv7
/m/06sy4c	/sports/pro_athlete/teams./sports/sports_team_roster/team	/m/01fjz9
/m/0t0n5	/location/location/time_zones	/m/02fqwt
/m/02_xgp2	/education/educational_degree/people_with_this_degree./education/education/student	/m/03gkn5
/m/0253b6	/people/person/places_lived./people/place_lived/location	/m/02hrh0_
/m/02kcz	/location/country/form_of_government	/m/06cx9
/m/06qgvf	/award/award_nominee/award_nominations./award/award_nomination/award_nominee	/m/05vsxz
/m/03gvpk	/people/person/profession	/m/0n1h
/m/05m9f9	/award/award_nominee/award_nominations./award/award_nomination/award	/m/07z2lx
/m/0154qm	/award/award_nominee/award_nominations./award/award_nomination/nominated_for	/m/017gl1
/m/0fhpv4	/award/award_category/nominees./award/award_nomination/nominated_for	/m/04vr_f
/m/02k6rq	/award/award_nominee/award_nominations./award/award_nomination/award_nominee	/m/0h0yt
/m/0154j	/organization/organization_member/member_of./organization/organization_membership/organization	/m/01rz1
/m/07g9f	/tv/tv_program/genre	/m/02n4kr
/m/033f8n	/film/film/estimated_budget./measurement_unit/dated_money_value/currency	/m/09nqf
/m/04j14qc	/film/film/genre	/m/04t36
/m/07nxvj	/film/film/production_companies	/m/02jd_7
/m/04gzd	/organization/organization_member/member_of./organization/organization_membership/organization	/m/01rz1
/m/07brj	/music/performance_role/track_performances./music/track_contribution/role	/m/05842k
/m/0bkj86	/education/educational_degree/people_with_this_degree./education/education/student	/m/018p4y
/m/0bmfnjs	/film/film/release_date_s./film/film_regional_release_date/film_release_region	/m/04g5k
/m/0fhp9	/travel/travel_destination/climate./travel/travel_destination_monthly_climate/month	/m/04wzr
/m/0g9yrw	/film/film/production_companies	/m/016tw3
/m/0jgd	/location/location/adjoin_s./location/adjoining_relationship/adjoins	/m/015fr
/m/094jv	/location/location/contains	/m/09kvv
/m/027kmrb	/award/award_nominee/award_nominations./award/award_nomination/nominated_for	/m/0bdjd
/m/09sb52	/award/award_category/winners./award/award_honor/award_winner	/m/09yhzs
/m/01z9_x	/people/person/gender	/m/05zppz
/m/013rds	/people/person/gender	/m/05zppz
/m/06qgvf	/award/award_nominee/award_nominations./award/award_nomination/nominated_for	/m/0cz_ym
/m/09f6b	/olympics/olympic_sport/athletes./olympics/olympic_athlete_affiliation/country	/m/06c1y
/m/0kryqm	/award/award_winner/awards_won./award/award_honor/award_winner	/m/04y79_n
/m/0fpj4lx	/people/person/profession	/m/0xzm
/m/0kr5_	/film/director/film	/m/0209hj
/m/04zwjd	/people/person/nationality	/m/0jgd
/m/01pgzn_	/award/award_nominee/award_nominations./award/award_nomination/award_nominee	/m/04w391
/m/02qkt	/location/location/contains	/m/0166b
/m/0gj96ln	/film/film/release_date_s./film/film_regional_release_date/film_release_region	/m/03gj2
/m/01cwhp	/award/award_nominee/award_nominations./award/award_nomination/award_nominee	/m/02qlg7s
/m/04y9dk	/people/person/gender	/m/05zppz
/m/01vdm0	/music/performance_role/track_performances./music/track_contribution/role	/m/01qbl
/m/060__7	/film/film/other_crew./film/film_crew_gig/crewmember	/m/094tsh6
/m/0184jw	/award/award_nominee/award_nominations./award/award_nomination/award	/m/0gr4k
/m/037mh8	/education/field_of_study/students_majoring./education/education/major_field_of_study	/m/02h40lc
/m/01kpt	/award/award_category/winners./award/award_honor/award_winner	/m/03fvqg
/m/02byfd	/base/popstra/celebrity/friendship./base/popstra/friendship/participant	/m/029q_y
/m/031786	/film/film/prequel	/m/03177r
/m/0b1f49	/award/award_nominee/award_nominations./award/award_nomination/nominated_for	/m/04vr_f
/m/03flwk	/award/award_nominee/award_nominations./award/award_nomination/award	/m/040njc
/m/0kvgnq	/film/film/other_crew./film/film_crew_gig/crewmember	/m/09rp4r_
/m/04vn5	/sports/sports_team/roster./american_football/football_historical_roster_position/position_s	/m/0b13yt
/m/0j_1v	/location/statistical_region/rent50_2./measurement_unit/dated_money_value/currency	/m/09nqf
/m/03qlv7	/music/performance_role/track_performances./music/track_contribution/role	/m/05842k
/m/07f5x	/location/statistical_region/gni_per_capita_in_ppp_dollars./measurement_unit/dated_money_value/currency	/m/09nqf
/m/04sx9_	/award/award_winner/awards_won./award/award_honor/award_winner	/m/0b_dy
/m/040njc	/award/award_category/nominees./award/award_nomination/nominated_for	/m/0661ql3
/m/06x68	/sports/professional_sports_team/draft_picks./sports/sports_league_draft_pick/school	/m/01jsk6
/m/011yxg	/film/film/production_companies	/m/016tt2
/m/02l4pj	/film/actor/film./film/performance/film	/m/0cc5qkt
/m/0jhn7	/user/jg/default_domain/olympic_games/sports	/m/0d1tm
/m/01xsc9	/people/person/spouse_s./people/marriage/type_of_union	/m/04ztj
/m/03_44z	/soccer/football_team/current_roster./soccer/football_roster_position/position	/m/02_j1w
/m/06s9y	/location/country/official_language	/m/02h40lc
/m/04mlh8	/film/actor/film./film/performance/film	/m/03h3x5
/m/03wh95l	/award/award_nominee/award_nominations./award/award_nomination/award	/m/0gkr9q
/m/0m3gy	/film/film/release_date_s./film/film_regional_release_date/film_release_region	/m/0f8l9c
/m/0jdhp	/award/award_winner/awards_won./award/award_honor/award_winner	/m/01vd7hn
/m/0h63q6t	/tv/tv_program/regular_cast./tv/regular_tv_appearance/actor	/m/0219q
/m/0c41y70	/sports/sports_team/colors	/m/019sc
/m/02825kb	/film/film/other_crew./film/film_crew_gig/film_crew_role	/m/0dxtw
/m/040njc	/award/award_category/nominees./award/award_nomination/nominated_for	/m/049xgc
/m/0dgrmp	/sports/sports_position/players./sports/sports_team_roster/team	/m/0287xhr
/m/06fcqw	/film/film/release_date_s./film/film_regional_release_date/film_release_region	/m/0154j
/m/02dlh2	/music/performance_role/track_performances./music/track_contribution/role	/m/01qbl
/m/0jgd	/olympics/olympic_participating_country/medals_won./olympics/olympic_medal_honor/olympics	/m/0lbbj
/m/0bsnm	/education/university/local_tuition./measurement_unit/dated_money_value/currency	/m/0ptk_
/m/03nx8mj	/film/film/music	/m/01mkn_d
/m/0gd9k	/film/director/film	/m/0dgrwqr
/m/03v3xp	/award/award_nominee/award_nominations./award/award_nomination/award_nominee	/m/02l4pj
/m/0dr_9t7	/film/film/genre	/m/05p553
/m/073749	/award/award_nominee/award_nominations./award/award_nomination/award_nominee	/m/03qd_
/m/01nz1q6	/award/award_nominee/award_nominations./award/award_nomination/award	/m/01ckbq
/m/01c0h6	/location/administrative_division/country	/m/03rk0
/m/02_j1w	/sports/sports_position/players./sports/sports_team_roster/team	/m/03fn16
/m/014lc_	/film/film/music	/m/023361
/m/02rdxsh	/award/award_category/nominees./award/award_nomination/nominated_for	/m/0hvvf
/m/06cgy	/people/person/nationality	/m/03rjj
/m/03h_9lg	/award/award_nominee/award_nominations./award/award_nomination/award_nominee	/m/036hf4
/m/0bshwmp	/film/film/genre	/m/02l7c8
/m/0ctb4g	/film/film/genre	/m/02n4kr
/m/0f5zj6	/base/popstra/celebrity/friendship./base/popstra/friendship/participant	/m/01zh29
/m/051cc	/influence/influence_node/influenced_by	/m/0bwx3
/m/03z20c	/film/film/other_crew./film/film_crew_gig/film_crew_role	/m/01pvkk
/m/05fnl9	/film/actor/film./film/performance/film	/m/0pvms
/m/08c9b0	/people/person/profession	/m/01c72t
/m/01_x6d	/people/person/places_lived./people/place_lived/location	/m/02cl1
/m/01j7rd	/award/award_winner/awards_won./award/award_honor/award_winner	/m/05bnq3j
/m/01vs4f3	/people/person/profession	/m/039v1
/m/0k2m6	/award/award_winning_work/awards_won./award/award_honor/award	/m/02rdxsh
/m/02j9z	/location/location/contains	/m/04g5k
/m/063t3j	/award/award_nominee/award_nominations./award/award_nomination/award	/m/01bgqh
/m/06mr6	/award/award_nominee/award_nominations./award/award_nomination/nominated_for	/m/07bx6
/m/0qb0j	/base/aareas/schema/administrative_area/administrative_parent	/m/0d05w3
/m/0c0tzp	/film/film_set_designer/film_sets_designed	/m/097zcz
/m/0cm2xh	/military/military_conflict/combatants./military/military_combatant_group/combatants	/m/02psqkz
/m/01gj8_	/people/person/gender	/m/05zppz
/m/04cbbz	/award/award_nominated_work/award_nominations./award/award_nomination/nominated_for	/m/06c0ns
/m/02_j1w	/sports/sports_position/players./sports/sports_team_roster/team	/m/09hldj
/m/0fq9zcx	/award/award_category/winners./award/award_honor/award_winner	/m/0h32q
/m/07y9ts	/award/award_ceremony/awards_presented./award/award_honor/honored_for	/m/01b_lz
/m/064_8sq	/language/human_language/countries_spoken_in	/m/0154j
/m/0cj2w	/award/award_nominee/award_nominations./award/award_nomination/award	/m/054krc
/m/05zvq6g	/award/award_category/nominees./award/award_nomination/nominated_for	/m/016mhd
/m/024dgj	/people/person/spouse_s./people/marriage/type_of_union	/m/04ztj
/m/01n6r0	/education/university/local_tuition./measurement_unit/dated_money_value/currency	/m/09nqf
/m/02z2mr7	/film/film/other_crew./film/film_crew_gig/film_crew_role	/m/0ch6mp2
/m/01swxv	/education/educational_institution/students_graduates./education/education/student	/m/012gx2
/m/0217m9	/education/educational_institution/students_graduates./education/education/major_field_of_study	/m/088tb
/m/0gs96	/award/award_category/winners./award/award_honor/award_winner	/m/05x2t7
/m/06z9f8	/soccer/football_team/current_roster./sports/sports_team_roster/position	/m/02_j1w
/m/050rj	/music/performance_role/track_performances./music/track_contribution/role	/m/02sgy
/m/02xbyr	/film/film/release_date_s./film/film_regional_release_date/film_release_region	/m/0ctw_b
/m/01n5309	/award/award_nominee/award_nominations./award/award_nomination/award	/m/09qvc0
/m/02lf1j	/film/actor/film./film/performance/film	/m/051zy_b
/m/01pgp6	/film/film/production_companies	/m/016tt2
/m/03vrp	/people/person/spouse_s./people/marriage/type_of_union	/m/04ztj
/m/03xpsrx	/base/schemastaging/person_extra/net_worth./measurement_unit/dated_money_value/currency	/m/09nqf
/m/041rhq	/film/actor/film./film/performance/film	/m/06c0ns
/m/0symg	/film/film/genre	/m/07s9rl0
/m/02x4x18	/award/award_category/winners./award/award_honor/award_winner	/m/0h1nt
/m/02q7fl9	/film/film/music	/m/01d4cb
/m/01v1d8	/music/instrument/instrumentalists	/m/01w9k25
/m/02wszf	/sports/sports_position/players./sports/sports_team_roster/team	/m/0713r
/m/03bdkd	/film/film/estimated_budget./measurement_unit/dated_money_value/currency	/m/09nqf
/m/041rx	/people/ethnicity/people	/m/04hcw
/m/0bkj86	/education/educational_degree/people_with_this_degree./education/education/institution	/m/0ym17
/m/0rh7t	/sports/sports_team_location/teams	/m/0ftf0f
/m/01bh6y	/award/award_nominee/award_nominations./award/award_nomination/award_nominee	/m/086sj
/m/0gk4g	/people/cause_of_death/people	/m/0hwd8
/m/02zbjwr	/sports/pro_athlete/teams./sports/sports_team_roster/team	/m/0425gc
/m/02bj6k	/people/person/spouse_s./people/marriage/type_of_union	/m/04ztj
/m/01h910	/people/person/profession	/m/0dxtg
/m/02k6rq	/award/award_winner/awards_won./award/award_honor/award_winner	/m/065jlv
/m/02qvhbb	/people/person/profession	/m/0dxtg
/m/029m83	/award/award_nominee/award_nominations./award/award_nomination/award	/m/040njc
/m/0jtg0	/music/instrument/instrumentalists	/m/01tw31
/m/0chghy	/base/popstra/location/vacationers./base/popstra/vacation_choice/vacationer	/m/01cwhp
/m/019fz	/influence/influence_node/peers./influence/peer_relationship/peers	/m/0424m
/m/06x68	/sports/professional_sports_team/draft_picks./sports/sports_league_draft_pick/school	/m/01lnyf
/m/012ykt	/film/actor/film./film/performance/film	/m/0drnwh
/m/014zz1	/music/performance_role/track_performances./music/track_contribution/role	/m/04q7r
/m/02bqxb	/film/film/language	/m/02h40lc
/m/0b79gfg	/award/award_nominee/award_nominations./award/award_nomination/nominated_for	/m/03cv_gy
/m/0c5dd	/film/film/genre	/m/05p553
/m/0d6_s	/film/film/other_crew./film/film_crew_gig/film_crew_role	/m/01vx2h
/m/0gls4q_	/people/person/profession	/m/0dxtg
/m/0mkg	/music/instrument/instrumentalists	/m/06rgq
/m/01cmp9	/award/award_winning_work/awards_won./award/award_honor/award	/m/09sb52
/m/01swxv	/business/business_operation/assets./measurement_unit/dated_money_value/currency	/m/09nqf
/m/03__77	/soccer/football_team/current_roster./sports/sports_team_roster/position	/m/0dgrmp
/m/0bq6ntw	/film/film/release_date_s./film/film_regional_release_date/film_release_region	/m/06t2t
/m/01qbl	/music/performance_role/track_performances./music/track_contribution/role	/m/03qlv7
/m/0686zv	/people/person/spouse_s./people/marriage/type_of_union	/m/04ztj
/m/037ls6	/food/food/nutrients./food/nutrition_fact/nutrient	/m/025sf0_
/m/06crng	/award/award_nominee/award_nominations./award/award_nomination/award	/m/05zvj3m
/m/018w8	/olympics/olympic_sport/athletes./olympics/olympic_athlete_affiliation/country	/m/03rjj
/m/0993r	/award/award_nominee/award_nominations./award/award_nomination/award_nominee	/m/020_95
/m/04hwbq	/film/film/release_date_s./film/film_regional_release_date/film_release_region	/m/03rk0
/m/04dn09n	/award/award_category/winners./award/award_honor/award_winner	/m/0h5f5n
/m/02y21l	/music/record_label/artist	/m/07hgm
/m/0151w_	/award/award_nominee/award_nominations./award/award_nomination/award_nominee	/m/0169dl
/m/023slg	/music/group_member/membership./music/group_membership/role	/m/0l14qv
/m/01vsy3q	/people/person/place_of_birth	/m/0d9jr
/m/04sx9_	/award/award_nominee/award_nominations./award/award_nomination/award_nominee	/m/04smkr
/m/07f1x	/location/country/form_of_government	/m/01fpfn
/m/086xm	/education/educational_institution/students_graduates./education/education/major_field_of_study	/m/037mh8
/m/0gj96ln	/film/film/other_crew./film/film_crew_gig/film_crew_role	/m/02r96rf
/m/0czp_	/award/award_category/nominees./award/award_nomination/nominated_for	/m/0k419
/m/02p2zq	/music/group_member/membership./music/group_membership/group	/m/014kyy
/m/016vg8	/award/award_nominee/award_nominations./award/award_nomination/award_nominee	/m/01p4vl
/m/068p_	/medicine/disease/notable_people_with_this_condition	/m/02c7lt
/m/04jjy	/film/film_subject/films	/m/0jyx6
/m/019mcm	/soccer/football_team/current_roster./soccer/football_roster_position/position	/m/0dgrmp
/m/0fhzwl	/award/award_winning_work/awards_won./award/award_honor/award	/m/0bp_b2
/m/07jbh	/olympics/olympic_sport/athletes./olympics/olympic_athlete_affiliation/country	/m/03rjj
/m/0b76kw1	/award/award_winning_work/awards_won./award/award_honor/award	/m/0bfvw2
/m/0l14md	/music/performance_role/regular_performances./music/group_membership/group	/m/089tm
/m/018ctl	/olympics/olympic_games/sports	/m/09f6b
/m/016lv3	/people/person/gender	/m/05zppz
/m/02_j7t	/film/actor/film./film/performance/film	/m/07yvsn
/m/07sqnh	/soccer/football_team/current_roster./sports/sports_team_roster/position	/m/0dgrmp
/m/03jht	/influence/influence_node/influenced_by	/m/0j3v
/m/04n52p6	/film/film/production_companies	/m/05h4t7
/m/01k_mc	/award/award_nominee/award_nominations./award/award_nomination/award	/m/01cw51
/m/01gvxh	/government/legislative_session/members./government/government_position_held/district_represented	/m/015jr
/m/0gqz2	/award/award_category/winners./award/award_honor/ceremony	/m/0fv89q
/m/04gxf	/sports/sports_team_location/teams	/m/0bjkk9
/m/01gsrl	/government/legislative_session/members./government/government_position_held/district_represented	/m/06yxd
/m/01bdxz	/soccer/football_team/current_roster./soccer/football_roster_position/position	/m/0dgrmp
/m/03b1sb	/film/film/genre	/m/0c3351
/m/0j2jr	/soccer/football_team/current_roster./soccer/football_roster_position/position	/m/0dgrmp
/m/0qmd5	/award/award_winning_work/awards_won./award/award_honor/award_winner	/m/026dx
/m/01gg59	/award/award_nominee/award_nominations./award/award_nomination/nominated_for	/m/09fn1w
/m/05qhw	/location/statistical_region/gdp_nominal./measurement_unit/dated_money_value/currency	/m/09nqf
/m/02_xgp2	/education/educational_degree/people_with_this_degree./education/education/institution	/m/01swxv
/m/03qgjwc	/award/award_category/winners./award/award_honor/award_winner	/m/03k545
/m/0gk4g	/people/cause_of_death/people	/m/030dx5
/m/02kx91	/tv/tv_network/programs./tv/tv_network_duration/program	/m/01_2n
/m/06z6r	/olympics/olympic_sport/athletes./olympics/olympic_athlete_affiliation/country	/m/0chghy
/m/01l1sq	/award/award_nominee/award_nominations./award/award_nomination/award_nominee	/m/01dy7j
/m/0dgrmp	/sports/sports_position/players./sports/sports_team_roster/team	/m/0g701n
/m/05vsxz	/award/award_nominee/award_nominations./award/award_nomination/award_nominee	/m/0m2wm
/m/09wj5	/film/actor/film./film/performance/film	/m/017gl1
/m/0gyfp9c	/film/film/release_date_s./film/film_regional_release_date/film_release_region	/m/0154j
/m/0mkg	/music/performance_role/regular_performances./music/group_membership/role	/m/07kc_
/m/03t97y	/film/film/other_crew./film/film_crew_gig/film_crew_role	/m/01vx2h
/m/028tv0	/music/performance_role/regular_performances./music/group_membership/group	/m/0knhk
/m/065jlv	/award/award_nominee/award_nominations./award/award_nomination/award_nominee	/m/0755wz
/m/06q8qh	/film/film/other_crew./film/film_crew_gig/film_crew_role	/m/01pvkk
/m/0pksh	/people/person/spouse_s./people/marriage/type_of_union	/m/04ztj
/m/08y2fn	/film/film/genre	/m/04xvh5
/m/01h910	/award/award_nominee/award_nominations./award/award_nomination/award_nominee	/m/02dth1
/m/025m8y	/award/award_category/winners./award/award_honor/ceremony	/m/01s695
/m/05683cn	/people/person/gender	/m/05zppz
/m/016z7s	/film/film/genre	/m/04xvh5
/m/0gd92	/film/film/language	/m/02h40lc
/m/05qm9f	/award/award_winning_work/awards_won./award/award_honor/award	/m/04dn09n
/m/03r1pr	/award/award_nominee/award_nominations./award/award_nomination/nominated_for	/m/011xg5
/m/0cqhk0	/award/award_category/winners./award/award_honor/award_winner	/m/05lb87
/m/0mp3l	/location/location/time_zones	/m/02hcv8
/m/01rr31	/education/university/local_tuition./measurement_unit/dated_money_value/currency	/m/09nqf
/m/02rzmzk	/people/person/spouse_s./people/marriage/type_of_union	/m/04ztj
/m/06p8m	/base/schemastaging/organization_extra/phone_number./base/schemastaging/phone_sandbox/service_language	/m/02h40lc
/m/05zm34	/sports/sports_position/players./sports/sports_team_roster/team	/m/05g3b
/m/09w1n	/olympics/olympic_sport/athletes./olympics/olympic_athlete_affiliation/country	/m/04hqz
/m/02p11jq	/music/record_label/artist	/m/05_swj
/m/016mhd	/film/film/other_crew./film/film_crew_gig/film_crew_role	/m/09vw2b7
/m/02w64f	/soccer/football_team/current_roster./sports/sports_team_roster/position	/m/02_j1w
/m/01wrcxr	/people/person/languages	/m/02h40lc
/m/0d0vqn	/olympics/olympic_participating_country/medals_won./olympics/olympic_medal_honor/olympics	/m/0124ld
/m/05d7rk	/people/person/religion	/m/0flw86
/m/0dgrmp	/sports/sports_position/players./sports/sports_team_roster/team	/m/06zpgb2
/m/02pzz3p	/award/award_category/nominees./award/award_nomination/nominated_for	/m/0phrl
/m/0xnvg	/people/ethnicity/people	/m/0807ml
/m/0645k5	/film/film/release_date_s./film/film_regional_release_date/film_release_region	/m/04gzd
/m/01h4rj	/people/person/languages	/m/02h40lc
/m/027rwmr	/award/award_nominee/award_nominations./award/award_nomination/nominated_for	/m/0295sy
/m/01j6t0	/medicine/symptom/symptom_of	/m/072hv
/m/0g68zt	/film/film/genre	/m/09blyk
/m/05_5rjx	/film/film/other_crew./film/film_crew_gig/film_crew_role	/m/0dxtw
/m/06bw5	/education/educational_institution/students_graduates./education/education/major_field_of_study	/m/04rjg
/m/03qd_	/base/schemastaging/person_extra/net_worth./measurement_unit/dated_money_value/currency	/m/09nqf
/m/0241y7	/film/film/production_companies	/m/04rcl7
/m/02ddqh	/award/award_category/winners./award/award_honor/ceremony	/m/01s695
/m/0261g5l	/people/person/place_of_birth	/m/0f2v0
/m/03y_46	/award/award_nominee/award_nominations./award/award_nomination/award_nominee	/m/0151w_
/m/01xn7x1	/soccer/football_team/current_roster./sports/sports_team_roster/position	/m/02_j1w
/m/01s3vk	/film/film/other_crew./film/film_crew_gig/film_crew_role	/m/0dxtw
/m/02dq8f	/organization/endowed_organization/endowment./measurement_unit/dated_money_value/currency	/m/09nqf
/m/02w29z	/film/actor/film./film/performance/film	/m/0btbyn
/m/02qjj7	/people/person/languages	/m/02h40lc
/m/01tkfj	/organization/organization/headquarters./location/mailing_address/citytown	/m/07dfk
/m/05_swj	/award/award_nominee/award_nominations./award/award_nomination/nominated_for	/m/019nnl
/m/0bfvd4	/award/award_category/category_of	/m/0gcf2r
/m/03q2t9	/people/person/gender	/m/05zppz
/m/0419kt	/film/film/other_crew./film/film_crew_gig/film_crew_role	/m/09vw2b7
/m/02zq43	/people/person/languages	/m/02h40lc
/m/027l0b	/film/actor/film./film/performance/film	/m/0291ck
/m/012mrr	/award/award_winning_work/awards_won./award/award_honor/award_winner	/m/06pj8
/m/06z6r	/olympics/olympic_sport/athletes./olympics/olympic_athlete_affiliation/country	/m/06npd
/m/0h7x	/location/location/partially_contains	/m/026zt
/m/033pf1	/film/film/estimated_budget./measurement_unit/dated_money_value/currency	/m/09nqf
/m/015pnb	/tv/tv_program/genre	/m/0c4xc
/m/01wyz92	/people/person/profession	/m/0nbcg
/m/0m66w	/award/award_nominee/award_nominations./award/award_nomination/award_nominee	/m/03fg0r
/m/03xf_m	/film/film/estimated_budget./measurement_unit/dated_money_value/currency	/m/09nqf
/m/040db	/influence/influence_node/influenced_by	/m/05gpy
/m/01n7q	/location/location/contains	/m/0r066
/m/025ts_z	/film/film/executive_produced_by	/m/09_99w
/m/065dc4	/film/film/estimated_budget./measurement_unit/dated_money_value/currency	/m/09nqf
/m/02gtm4	/sports/sports_team/colors	/m/088fh
/m/03d2k	/award/award_nominee/award_nominations./award/award_nomination/award	/m/01cw51
/m/0h14ln	/film/film/other_crew./film/film_crew_gig/film_crew_role	/m/0ch6mp2
/m/01b65l	/award/award_winning_work/awards_won./award/award_honor/award_winner	/m/0265v21
/m/011ysn	/film/film/other_crew./film/film_crew_gig/film_crew_role	/m/0ch6mp2
/m/01l7qw	/award/award_nominee/award_nominations./award/award_nomination/nominated_for	/m/01242_
/m/04sh80	/film/film/written_by	/m/06d6y
/m/01hb6v	/people/person/gender	/m/05zppz
/m/07zft	/people/person/profession	/m/01c72t
/m/01c6k4	/base/schemastaging/organization_extra/phone_number./base/schemastaging/phone_sandbox/service_language	/m/064_8sq
/m/0c02jh8	/sports/sports_team/colors	/m/01g5v
/m/01w40h	/music/record_label/artist	/m/0knhk
/m/01b195	/film/film/production_companies	/m/02jd_7
/m/059j4x	/people/person/gender	/m/05zppz
/m/016tt2	/film/film_distributor/films_distributed./film/film_film_distributor_relationship/film	/m/0642ykh
/m/02p86pb	/film/film/language	/m/02h40lc
/m/0_9wr	/film/film/production_companies	/m/016tw3
/m/03cv_gy	/award/award_winning_work/awards_won./award/award_honor/award_winner	/m/0b79gfg
/m/07kb5	/people/person/religion	/m/0c8wxp
/m/01nfys	/people/person/gender	/m/05zppz
/m/049xgc	/film/film/genre	/m/03bxz7
/m/064177	/people/person/profession	/m/0dxtg
/m/04bgy	/people/person/profession	/m/01c72t
/m/01clyr	/music/record_label/artist	/m/02qwg
/m/05c26ss	/film/film/music	/m/0150t6
/m/09sdmz	/award/award_category/nominees./award/award_nomination/nominated_for	/m/047myg9
/m/01hc9_	/influence/influence_node/influenced_by	/m/07lp1
/m/0dbxy	/people/ethnicity/people	/m/04f7c55
/m/02y_lrp	/film/film/other_crew./film/film_crew_gig/film_crew_role	/m/01pvkk
/m/01v_pj6	/award/award_nominee/award_nominations./award/award_nomination/award	/m/02f73b
/m/047xyn	/award/award_category/winners./award/award_honor/award_winner	/m/014ps4
/m/01cw51	/award/award_category/winners./award/award_honor/award_winner	/m/06s7rd
/m/014j1m	/food/food/nutrients./food/nutrition_fact/nutrient	/m/06x4c
/m/026lj	/user/alexander/philosophy/philosopher/interests	/m/02jcc
/m/012wyq	/location/location/contains	/m/02b7nz
/m/02qw1zx	/sports/sports_league_draft/picks./sports/sports_league_draft_pick/school	/m/01swxv
/m/02cg41	/award/award_ceremony/awards_presented./award/award_honor/award_winner	/m/03t852
/m/02v8kmz	/film/film/genre	/m/02l7c8
/m/01qscs	/people/person/places_lived./people/place_lived/location	/m/030qb3t
/m/07h07	/award/award_nominee/award_nominations./award/award_nomination/award_nominee	/m/03m9c8
/m/087pfc	/film/film/release_date_s./film/film_regional_release_date/film_release_region	/m/06t2t
/m/02g5h5	/award/award_nominee/award_nominations./award/award_nomination/award	/m/0cqhk0
/m/037mh8	/education/field_of_study/students_majoring./education/education/student	/m/02kxbwx
/m/04ktcgn	/award/award_nominee/award_nominations./award/award_nomination/nominated_for	/m/01vksx
/m/019fz	/influence/influence_node/influenced_by	/m/07ym0
/m/04vzv4	/award/award_nominee/award_nominations./award/award_nomination/award_nominee	/m/02cqbx
/m/07kb5	/user/alexander/philosophy/philosopher/interests	/m/02jcc
/m/07bx6	/film/film/estimated_budget./measurement_unit/dated_money_value/currency	/m/09nqf
/m/030hcs	/people/person/spouse_s./people/marriage/spouse	/m/030hbp
/m/01qqtr	/award/award_winner/awards_won./award/award_honor/award_winner	/m/03zg2x
/m/07bwr	/film/film/estimated_budget./measurement_unit/dated_money_value/currency	/m/09nqf
/m/0dzst	/education/educational_institution/students_graduates./education/education/student	/m/016lh0
/m/01_2n	/tv/tv_program/genre	/m/07s9rl0
/m/06ylv0	/soccer/football_team/current_roster./soccer/football_roster_position/position	/m/0dgrmp
/m/0c1jh	/people/person/nationality	/m/03rjj
/m/0d7wh	/people/ethnicity/people	/m/0126rp
/m/01hcj2	/base/popstra/celebrity/friendship./base/popstra/friendship/participant	/m/0bq2g
/m/0315q3	/award/award_nominee/award_nominations./award/award_nomination/award_nominee	/m/0309lm
/m/03s9kp	/film/film/genre	/m/05c3mp2
/m/0fxky3	/people/person/spouse_s./people/marriage/type_of_union	/m/04ztj
/m/01vsy3q	/influence/influence_node/peers./influence/peer_relationship/peers	/m/044k8
/m/01kwsg	/film/actor/film./film/performance/film	/m/06q8qh
/m/0f5xn	/film/actor/film./film/performance/film	/m/02yvct
/m/0bwfwpj	/film/film/release_date_s./film/film_regional_release_date/film_release_region	/m/05qhw
/m/01svw8n	/award/award_nominee/award_nominations./award/award_nomination/award_nominee	/m/01w9wwg
/m/02v1m7	/award/award_category/winners./award/award_honor/ceremony	/m/01s695
/m/019pm_	/base/popstra/celebrity/breakup./base/popstra/breakup/participant	/m/0h7pj
/m/02qyxs5	/award/award_category/nominees./award/award_nomination/nominated_for	/m/02rb84n
/m/014mlp	/education/educational_degree/people_with_this_degree./education/education/major_field_of_study	/m/06b_j
/m/03ln8b	/award/award_winning_work/awards_won./award/award_honor/award_winner	/m/01dw4q
/m/0141kz	/people/person/places_lived./people/place_lived/location	/m/06y9v
/m/038bht	/film/actor/film./film/performance/film	/m/02yxbc
/m/05f7w84	/tv/tv_program/regular_cast./tv/regular_tv_appearance/actor	/m/01r4bps
/m/06qm3	/media_common/netflix_genre/titles	/m/033fqh
/m/02hft3	/education/university/fraternities_and_sororities	/m/0325pb
/m/02wtp6	/film/film/release_date_s./film/film_regional_release_date/film_release_region	/m/05qhw
/m/03q2t9	/people/person/places_lived./people/place_lived/location	/m/019fh
/m/0kz4w	/sports/sports_team/colors	/m/01g5v
/m/01gvts	/award/award_winning_work/awards_won./award/award_honor/award	/m/040njc
/m/0gtsx8c	/film/film/language	/m/02h40lc
/m/0gr4k	/award/award_category/nominees./award/award_nomination/nominated_for	/m/0pd64
/m/0633p0	/award/award_nominee/award_nominations./award/award_nomination/award_nominee	/m/06dn58
/m/0ph24	/tv/tv_program/languages	/m/02h40lc
/m/0c3ns	/award/award_winner/awards_won./award/award_honor/award_winner	/m/07b3r9
/m/016yvw	/award/award_nominee/award_nominations./award/award_nomination/award_nominee	/m/01kwsg
/m/0k3jq	/location/location/adjoin_s./location/adjoining_relationship/adjoins	/m/0k3gj
/m/0sxmx	/award/award_winning_work/awards_won./award/award_honor/award	/m/02qyntr
/m/02kxbwx	/people/person/gender	/m/05zppz
/m/01gz9n	/people/person/spouse_s./people/marriage/type_of_union	/m/04ztj
/m/04n52p6	/film/film/other_crew./film/film_crew_gig/film_crew_role	/m/020xn5
/m/021yw7	/base/popstra/celebrity/dated./base/popstra/dated/participant	/m/01jb26
/m/0r2l7	/base/biblioness/bibs_location/state	/m/05fjf
/m/03rhqg	/music/record_label/artist	/m/01t8399
/m/0473rc	/film/film/featured_film_locations	/m/030qb3t
/m/0jtg0	/music/performance_role/regular_performances./music/group_membership/role	/m/0l14qv
/m/0d05w3	/olympics/olympic_participating_country/medals_won./olympics/olympic_medal_honor/olympics	/m/06sks6
/m/032sl_	/award/award_winning_work/awards_won./award/award_honor/award_winner	/m/0147dk
/m/014v6f	/award/award_nominee/award_nominations./award/award_nomination/award_nominee	/m/0bgrsl
/m/0kjrx	/film/actor/dubbing_performances./film/dubbing_performance/language	/m/02h40lc
/m/01wdcxk	/people/person/profession	/m/039v1
/m/01pbxb	/people/person/profession	/m/016z4k
/m/05z55	/food/food/nutrients./food/nutrition_fact/nutrient	/m/025s0s0
/m/01kwlwp	/people/person/profession	/m/0n1h
/m/05b6rdt	/film/film/release_date_s./film/film_regional_release_date/film_release_region	/m/0ctw_b
/m/0gk4g	/people/cause_of_death/people	/m/052h3
/m/05qbckf	/film/film/other_crew./film/film_crew_gig/film_crew_role	/m/0ch6mp2
/m/05fjf	/location/location/contains	/m/0n5fl
/m/0f_nbyh	/award/award_category/nominees./award/award_nomination/nominated_for	/m/026p4q7
/m/05zm34	/sports/sports_position/players./sports/sports_team_roster/team	/m/07l24
/m/016tt2	/film/film_distributor/films_distributed./film/film_film_distributor_relationship/film	/m/01f7gh
/m/01fxfk	/award/award_nominee/award_nominations./award/award_nomination/award	/m/01l29r
/m/03k7bd	/award/award_nominee/award_nominations./award/award_nomination/award_nominee	/m/016yvw
/m/01c9dd	/award/award_category/winners./award/award_honor/ceremony	/m/09n4nb
/m/0h63gl9	/film/film/release_date_s./film/film_regional_release_date/film_release_region	/m/05qhw
/m/05qm9f	/award/award_winning_work/awards_won./award/award_honor/award	/m/0gr4k
/m/044p4_	/soccer/football_team/current_roster./sports/sports_team_roster/position	/m/02_j1w
/m/02l3_5	/award/award_nominee/award_nominations./award/award_nomination/award	/m/09qvf4
/m/011wtv	/film/film/estimated_budget./measurement_unit/dated_money_value/currency	/m/09nqf
/m/01sby_	/film/film/genre	/m/07s9rl0
/m/01fdc0	/award/award_nominee/award_nominations./award/award_nomination/award	/m/09sb52
/m/014mlp	/education/educational_degree/people_with_this_degree./education/education/institution	/m/012mzw
/m/05pbl56	/film/film/other_crew./film/film_crew_gig/film_crew_role	/m/089g0h
/m/01z7_f	/film/actor/film./film/performance/film	/m/0277j40
/m/09r9m7	/people/person/profession	/m/01c72t
/m/05l8y	/location/statistical_region/gdp_real./measurement_unit/adjusted_money_value/adjustment_currency	/m/09nqf
/m/026zvx7	/award/award_nominee/award_nominations./award/award_nomination/award_nominee	/m/05lb30
/m/0n3dv	/location/us_county/county_seat	/m/0ynfz
/m/08sfxj	/film/film/genre	/m/07s9rl0
/m/03qnc6q	/film/film/estimated_budget./measurement_unit/dated_money_value/currency	/m/09nqf
/m/07s9rl0	/media_common/netflix_genre/titles	/m/07jqjx
/m/0djc3s	/people/person/nationality	/m/03rk0
/m/01wg6y	/people/person/profession	/m/01c72t
/m/049xgc	/film/film/cinematography	/m/06r_by
/m/03f7nt	/award/award_winning_work/awards_won./award/award_honor/honored_for	/m/03xf_m
/m/0291hr	/film/film/produced_by	/m/052hl
/m/0b90_r	/military/military_combatant/military_conflicts./military/military_combatant_group/combatants	/m/087vz
/m/0k2cb	/film/film/genre	/m/04xvh5
/m/02wd48	/people/person/profession	/m/0dxtg
/m/02y49	/people/person/spouse_s./people/marriage/type_of_union	/m/04ztj
/m/078g3l	/people/person/spouse_s./people/marriage/type_of_union	/m/04ztj
/m/09d6p2	/organization/role/leaders./organization/leadership/organization	/m/0778_3
/m/0l14j_	/music/performance_role/regular_performances./music/group_membership/role	/m/0g2ff
/m/02w_6xj	/award/award_category/winners./award/award_honor/award_winner	/m/02l5rm
/m/0lkr7	/award/award_nominee/award_nominations./award/award_nomination/nominated_for	/m/011ysn
/m/04rjg	/education/field_of_study/students_majoring./education/education/major_field_of_study	/m/04g51
/m/014dm6	/award/award_nominee/award_nominations./award/award_nomination/award	/m/02ddqh
/m/02hft3	/business/business_operation/assets./measurement_unit/dated_money_value/currency	/m/09nqf
/m/04cbbz	/film/film/language	/m/02h40lc
/m/01cqz5	/people/person/religion	/m/07mfk
/m/05m_8	/baseball/baseball_team/team_stats./baseball/baseball_team_stats/season	/m/027pwzc
/m/01hjy5	/education/educational_institution/students_graduates./education/education/student	/m/027n4zv
/m/03cw411	/film/film/release_date_s./film/film_regional_release_date/film_release_region	/m/0chghy
/m/02wb6d	/people/person/profession	/m/01c72t
/m/0b_6qj	/time/event/locations	/m/0d9jr
/m/02wk_43	/award/award_winner/awards_won./award/award_honor/award_winner	/m/0crx5w
/m/07f3xb	/people/person/languages	/m/02h40lc
/m/02_j1w	/sports/sports_position/players./sports/sports_team_roster/team	/m/02b14q
/m/02lw5z	/organization/organization/headquarters./location/mailing_address/state_province_region	/m/01n7q
/m/01n_g9	/education/educational_institution/students_graduates./education/education/major_field_of_study	/m/04rjg
/m/0169dl	/film/actor/film./film/performance/film	/m/0gd92
/m/0cc97st	/film/film/genre	/m/05p553
/m/093h7p	/film/film_distributor/films_distributed./film/film_film_distributor_relationship/film	/m/099bhp
/m/07tw_b	/film/film/written_by	/m/052hl
/m/0gyv0b4	/film/film/personal_appearances./film/personal_film_appearance/person	/m/02ts3h
/m/040db	/influence/influence_node/influenced_by	/m/05qmj
/m/0nv6n	/location/location/adjoin_s./location/adjoining_relationship/adjoins	/m/0nvg4
/m/031786	/film/film/other_crew./film/film_crew_gig/film_crew_role	/m/09zzb8
/m/01wrcxr	/film/actor/film./film/performance/film	/m/01gvpz
/m/06q8qh	/film/film/other_crew./film/film_crew_gig/film_crew_role	/m/0ch6mp2
/m/05vtbl	/people/person/profession	/m/0np9r
/m/01svw8n	/award/award_nominee/award_nominations./award/award_nomination/award	/m/03t5n3
/m/0bynt	/olympics/olympic_sport/athletes./olympics/olympic_athlete_affiliation/country	/m/05qkp
/m/01rh0w	/film/actor/film./film/performance/film	/m/0dnkmq
/m/0fpkhkz	/film/film/release_date_s./film/film_regional_release_date/film_release_region	/m/06c1y
/m/03j2gxx	/people/person/employment_history./business/employment_tenure/company	/m/0yls9
/m/01mhwk	/award/award_ceremony/awards_presented./award/award_honor/award_winner	/m/03j149k
/m/035d1m	/olympics/olympic_sport/athletes./olympics/olympic_athlete_affiliation/country	/m/0h7x
/m/02qwg	/music/group_member/membership./music/group_membership/role	/m/028tv0
/m/0cwrr	/tv/tv_program/regular_cast./tv/regular_tv_appearance/actor	/m/01vy_v8
/m/0194zl	/film/film/genre	/m/0hn10
/m/0dgrmp	/sports/sports_position/players./sports/sports_team_roster/team	/m/01xn7x1
/m/01vw26l	/award/award_nominee/award_nominations./award/award_nomination/award_nominee	/m/0fby2t
/m/0cc97st	/film/film/release_date_s./film/film_regional_release_date/film_release_region	/m/03gj2
/m/01ydzx	/people/person/profession	/m/039v1
/m/03np_7	/education/educational_institution/colors	/m/01g5v
/m/06crng	/people/person/spouse_s./people/marriage/location_of_ceremony	/m/03rk0
/m/0cp9f9	/people/person/spouse_s./people/marriage/type_of_union	/m/04ztj
/m/019pm_	/award/award_winner/awards_won./award/award_honor/award_winner	/m/048lv
/m/0djgt	/base/aareas/schema/administrative_area/administrative_parent	/m/03rk0
/m/03ffcz	/film/film/language	/m/02h40lc
/m/07dnx	/people/person/profession	/m/0cbd2
/m/0lccn	/people/person/profession	/m/0cbd2
/m/01nyl	/location/statistical_region/gdp_real./measurement_unit/adjusted_money_value/adjustment_currency	/m/09nqf
/m/05842k	/music/performance_role/track_performances./music/track_contribution/role	/m/01p970
/m/01pgzn_	/award/award_nominee/award_nominations./award/award_nomination/award_nominee	/m/02k4b2
/m/05ldxl	/film/film/release_date_s./film/film_regional_release_date/film_release_region	/m/0f8l9c
/m/01ckhj	/people/person/gender	/m/05zppz
/m/01ckhj	/award/award_nominee/award_nominations./award/award_nomination/nominated_for	/m/0_b9f
/m/035xwd	/film/film/genre	/m/07s9rl0
/m/0209hj	/film/film/other_crew./film/film_crew_gig/film_crew_role	/m/01pvkk
/m/09kvv	/education/educational_institution/students_graduates./education/education/major_field_of_study	/m/037mh8
/m/06f_qn	/people/person/profession	/m/0np9r
/m/04n52p6	/film/film/release_date_s./film/film_regional_release_date/film_release_region	/m/04g5k
/m/06s7rd	/award/award_nominee/award_nominations./award/award_nomination/award	/m/02f777
/m/0n84k	/base/biblioness/bibs_location/country	/m/03rk0
/m/014ps4	/award/award_nominee/award_nominations./award/award_nomination/award	/m/0262zm
/m/019vhk	/film/film/other_crew./film/film_crew_gig/film_crew_role	/m/09zzb8
/m/01cmp9	/film/film/genre	/m/07s9rl0
/m/0b478	/people/person/spouse_s./people/marriage/type_of_union	/m/04ztj
/m/0432_5	/film/film/release_date_s./film/film_regional_release_date/film_release_region	/m/0jgd
/m/01hznh	/soccer/football_team/current_roster./soccer/football_roster_position/position	/m/02_j1w
/m/05q7cj	/award/award_ceremony/awards_presented./award/award_honor/award_winner	/m/01vwllw
/m/04smdd	/film/film/genre	/m/07s9rl0
/m/02q0k7v	/film/film/other_crew./film/film_crew_gig/film_crew_role	/m/02r96rf
/m/03177r	/film/film/language	/m/02h40lc
/m/03f1r6t	/people/person/gender	/m/05zppz
/m/0mkg	/music/performance_role/regular_performances./music/group_membership/role	/m/07brj
/m/0bqs56	/people/person/places_lived./people/place_lived/location	/m/030qb3t
/m/01l7qw	/award/award_nominee/award_nominations./award/award_nomination/award	/m/04kxsb
/m/0cp0ph6	/film/film/release_date_s./film/film_regional_release_date/film_release_region	/m/03rjj
/m/06g2d1	/people/person/languages	/m/02h40lc
/m/0c2ry	/award/award_nominee/award_nominations./award/award_nomination/nominated_for	/m/0jz71
/m/0kx4m	/award/award_winner/awards_won./award/award_honor/award_winner	/m/0343h
/m/03rjj	/location/location/contains	/m/0hknf
/m/0f8l9c	/olympics/olympic_participating_country/athletes./olympics/olympic_athlete_affiliation/olympics	/m/018ljb
/m/0jc7g	/location/statistical_region/rent50_2./measurement_unit/dated_money_value/currency	/m/09nqf
/m/01r93l	/base/popstra/celebrity/friendship./base/popstra/friendship/participant	/m/0k269
/m/01wz_ml	/music/artist/track_contributions./music/track_contribution/role	/m/06w87
/m/032sl_	/film/film/music	/m/04pf4r
/m/08gwzt	/people/person/gender	/m/05zppz
/m/0372p	/people/person/profession	/m/06q2q
/m/05pxnmb	/film/film/featured_film_locations	/m/030qb3t
/m/064vjs	/olympics/olympic_sport/athletes./olympics/olympic_athlete_affiliation/country	/m/04g5k
/m/0168cl	/people/person/spouse_s./people/marriage/type_of_union	/m/04ztj
/m/014mlp	/education/educational_degree/people_with_this_degree./education/education/institution	/m/01n6r0
/m/0mdqp	/influence/influence_node/influenced_by	/m/014z8v
/m/01ztgm	/people/person/gender	/m/05zppz
/m/01p970	/music/performance_role/track_performances./music/track_contribution/role	/m/01w4c9
/m/01xdxy	/film/film/other_crew./film/film_crew_gig/film_crew_role	/m/089g0h
/m/05b4w	/olympics/olympic_participating_country/athletes./olympics/olympic_athlete_affiliation/olympics	/m/0sxrz
/m/03ckfl9	/music/genre/artists	/m/024dw0
/m/0dgrmp	/sports/sports_position/players./sports/sports_team_roster/team	/m/03m6zs
/m/0c3351	/media_common/netflix_genre/titles	/m/017z49
/m/030znt	/award/award_nominee/award_nominations./award/award_nomination/award_nominee	/m/01dw4q
/m/03k7bd	/award/award_nominee/award_nominations./award/award_nomination/award	/m/09sdmz
/m/06c0ns	/award/award_winning_work/awards_won./award/award_honor/honored_for	/m/03phtz
/m/030znt	/award/award_nominee/award_nominations./award/award_nomination/nominated_for	/m/064ndc
/m/0b85mm	/film/film/other_crew./film/film_crew_gig/film_crew_role	/m/09zzb8
/m/05z55	/food/food/nutrients./food/nutrition_fact/nutrient	/m/09pbb
/m/01b9ck	/award/award_nominee/award_nominations./award/award_nomination/nominated_for	/m/0bykpk
/m/0bwx3	/people/person/places_lived./people/place_lived/location	/m/05k7sb
/m/0bdwqv	/award/award_category/category_of	/m/0gcf2r
/m/018c_r	/base/schemastaging/organization_extra/phone_number./base/schemastaging/phone_sandbox/service_language	/m/02h40lc
/m/027pfg	/film/film/release_date_s./film/film_regional_release_date/film_release_region	/m/0h7x
/m/0454s1	/people/person/profession	/m/0dxtg
/m/0fhpv4	/award/award_category/nominees./award/award_nomination/nominated_for	/m/0d4htf
/m/02nhxf	/award/award_category/winners./award/award_honor/ceremony	/m/013b2h
/m/0cqt41	/sports/sports_team/roster./baseball/baseball_roster_position/position	/m/01z9v6
/m/05q7cj	/time/event/instance_of_recurring_event	/m/0g_w
/m/04tng0	/film/film/other_crew./film/film_crew_gig/film_crew_role	/m/0dxtw
/m/07b3r9	/award/award_winner/awards_won./award/award_honor/award_winner	/m/0c3ns
/m/049k4w	/sports/sports_position/players./sports/sports_team_roster/team	/m/07l8x
/m/01vsl3_	/music/artist/track_contributions./music/track_contribution/role	/m/0xzly
/m/0tygl	/location/statistical_region/rent50_2./measurement_unit/dated_money_value/currency	/m/09nqf
/m/02rv1w	/organization/endowed_organization/endowment./measurement_unit/dated_money_value/currency	/m/09nqf
/m/01bbwp	/people/person/spouse_s./people/marriage/type_of_union	/m/04ztj
/m/05vzw3	/award/award_nominee/award_nominations./award/award_nomination/award_nominee	/m/01vs_v8
/m/07jrjb	/celebrities/celebrity/sexual_relationships./celebrities/romantic_relationship/celebrity	/m/01w_10
/m/0295sy	/film/film/language	/m/02h40lc
/m/0c3351	/media_common/netflix_genre/titles	/m/01jmyj
/m/0404wqb	/people/person/languages	/m/02h40lc
/m/0yls9	/organization/organization/headquarters./location/mailing_address/state_province_region	/m/0jt5zcn
/m/0k_9j	/film/film/cinematography	/m/06p0s1
/m/05xpv	/people/deceased_person/place_of_death	/m/0k049
/m/016kv6	/film/film/language	/m/02h40lc
/m/015nhn	/government/politician/government_positions_held./government/government_position_held/basic_title	/m/0p5vf
/m/03cglm	/award/award_nominee/award_nominations./award/award_nomination/nominated_for	/m/0cz_ym
/m/0257pw	/award/award_category/category_of	/m/0c4ys
/m/03lty	/music/genre/artists	/m/02whj
/m/02zmh5	/award/award_nominee/award_nominations./award/award_nomination/award	/m/01bgqh
/m/02bh8z	/music/record_label/artist	/m/01fkxr
/m/0bl8l	/sports/sports_team/colors	/m/01g5v
/m/01wj18h	/award/award_nominee/award_nominations./award/award_nomination/award_nominee	/m/02bgmr
/m/0ndwt2w	/film/film/costume_design_by	/m/02h1rt
/m/01271h	/award/award_nominee/award_nominations./award/award_nomination/award	/m/054krc
/m/07lnk	/music/genre/artists	/m/01v_pj6
/m/0gnkb	/film/film/music	/m/025vry
/m/0b2km_	/film/film/other_crew./film/film_crew_gig/film_crew_role	/m/01pvkk
/m/071xj	/people/person/spouse_s./people/marriage/type_of_union	/m/04ztj
/m/0gv5c	/people/person/spouse_s./people/marriage/type_of_union	/m/04ztj
/m/04n52p6	/film/film/release_date_s./film/film_regional_release_date/film_release_region	/m/0h7x
/m/015c2f	/award/award_nominee/award_nominations./award/award_nomination/nominated_for	/m/05h43ls
/m/02p76f9	/film/film/estimated_budget./measurement_unit/dated_money_value/currency	/m/09nqf
/m/027kmrb	/people/person/spouse_s./people/marriage/type_of_union	/m/04ztj
/m/0l14md	/music/performance_role/regular_performances./music/group_membership/group	/m/017mbb
/m/03j3pg9	/award/award_nominee/award_nominations./award/award_nomination/award_nominee	/m/01vw20h
/m/02x0fs9	/film/film/language	/m/02h40lc
/m/0ptdz	/film/film/language	/m/02h40lc
/m/07j8r	/film/film/genre	/m/07s9rl0
/m/06jkm	/people/person/profession	/m/0cbd2
/m/04y79_n	/award/award_winner/awards_won./award/award_honor/award_winner	/m/065ydwb
/m/01jmyj	/film/film/music	/m/023361
/m/01v1d8	/music/performance_role/regular_performances./music/group_membership/role	/m/0l14md
/m/0bp_b2	/award/award_category/nominees./award/award_nomination/nominated_for	/m/0828jw
/m/06rzwx	/film/film/estimated_budget./measurement_unit/dated_money_value/currency	/m/09nqf
/m/06cgy	/film/actor/film./film/performance/film	/m/06cm5
/m/05y5kf	/award/award_nominee/award_nominations./award/award_nomination/award_nominee	/m/02w9895
/m/048wrb	/award/award_winner/awards_won./award/award_honor/award_winner	/m/0cj2nl
/m/049nq	/location/country/official_language	/m/02bv9
/m/02lg3y	/award/award_nominee/award_nominations./award/award_nomination/award_nominee	/m/01dy7j
/m/01pcj4	/business/business_operation/operating_income./measurement_unit/dated_money_value/currency	/m/09nqf
/m/0pvms	/film/film/produced_by	/m/04353
/m/0qmk5	/tv/tv_program/program_creator	/m/04mx__
/m/01bgqh	/award/award_category/winners./award/award_honor/award_winner	/m/02qwg
/m/01lhdt	/education/educational_institution/students_graduates./education/education/student	/m/07dnx
/m/03ct7jd	/film/film/genre	/m/02n4kr
/m/03xkps	/award/award_winner/awards_won./award/award_honor/award_winner	/m/015c2f
/m/04wgh	/location/country/form_of_government	/m/01fpfn
/m/01gp_x	/award/award_winner/awards_won./award/award_honor/award_winner	/m/027hnjh
/m/0879bpq	/film/film/release_date_s./film/film_regional_release_date/film_release_region	/m/0h7x
/m/026mg3	/award/award_category/category_of	/m/0c4ys
/m/013q07	/film/film/language	/m/02h40lc
/m/03cw411	/film/film/release_date_s./film/film_regional_release_date/film_release_region	/m/06t2t
/m/02qm5j	/music/genre/artists	/m/012zng
/m/0fw9vx	/sports/sports_team/sport	/m/018w8
/m/013km	/people/person/gender	/m/05zppz
/m/0lp_cd3	/award/award_ceremony/awards_presented./award/award_honor/award_winner	/m/01j7rd
/m/049k07	/award/award_nominee/award_nominations./award/award_nomination/nominated_for	/m/0b76t12
/m/02kxbwx	/film/director/film	/m/02704ff
/m/016vg8	/award/award_nominee/award_nominations./award/award_nomination/award_nominee	/m/023kzp
/m/07cn2c	/award/award_winner/awards_won./award/award_honor/award_winner	/m/02s5v5
/m/0bgv4g	/sports/sports_position/players./sports/sports_team_roster/team	/m/0289q
/m/01y9xg	/award/award_nominee/award_nominations./award/award_nomination/award_nominee	/m/01y665
/m/03kts	/award/award_nominee/award_nominations./award/award_nomination/award	/m/0gkvb7
/m/018ljb	/olympics/olympic_games/sports	/m/0bynt
/m/06182p	/education/educational_institution/students_graduates./education/education/student	/m/012dr7
/m/01w524f	/people/person/profession	/m/0nbcg
/m/01vsy3q	/influence/influence_node/peers./influence/peer_relationship/peers	/m/02qwg
/m/02fgp0	/award/award_nominee/award_nominations./award/award_nomination/award_nominee	/m/02fgpf
/m/0466s8n	/film/film/other_crew./film/film_crew_gig/film_crew_role	/m/09zzb8
/m/047p7fr	/film/film/release_date_s./film/film_regional_release_date/film_release_region	/m/015fr
/m/0kv238	/film/film/release_date_s./film/film_regional_release_date/film_release_region	/m/0jgd
/m/059f4	/location/statistical_region/religions./location/religion_percentage/religion	/m/0c8wxp
/m/0k2sk	/film/film/production_companies	/m/04rcl7
/m/0g2c8	/award/hall_of_fame/inductees./award/hall_of_fame_induction/inductee	/m/07hgm
/m/04t2l2	/award/award_nominee/award_nominations./award/award_nomination/award_nominee	/m/0cj2nl
/m/016khd	/award/award_nominee/award_nominations./award/award_nomination/award	/m/04kxsb
/m/0283xx2	/film/film_distributor/films_distributed./film/film_film_distributor_relationship/film	/m/016mhd
/m/05gjfk	/soccer/football_team/current_roster./soccer/football_roster_position/position	/m/0dgrmp
/m/01h6pn	/military/military_conflict/combatants./military/military_combatant_group/combatants	/m/05qhw
/m/01xdf5	/people/person/gender	/m/05zppz
/m/07g2b	/people/person/profession	/m/0cbd2
/m/03flwk	/people/person/profession	/m/0dxtg
/m/026yqrr	/award/award_nominee/award_nominations./award/award_nomination/award_nominee	/m/01w9k25
/m/05842k	/music/performance_role/track_performances./music/track_contribution/role	/m/02dlh2
/m/06gst	/music/record_label/artist	/m/0f_y9
/m/02l7c8	/media_common/netflix_genre/titles	/m/03nm_fh
/m/026y23w	/sports/pro_athlete/teams./sports/sports_team_roster/team	/m/03dj6y
/m/040njc	/award/award_category/nominees./award/award_nomination/nominated_for	/m/0sxns
/m/064_8sq	/education/field_of_study/students_majoring./education/education/major_field_of_study	/m/037mh8
/m/01xcqc	/people/person/place_of_birth	/m/01sn3
/m/013b2h	/award/award_ceremony/awards_presented./award/award_honor/award_winner	/m/014z8v
/m/03rk0	/location/location/adjoin_s./location/adjoining_relationship/adjoins	/m/06m_5
/m/01qhm_	/people/ethnicity/people	/m/03t852
/m/06x68	/sports/professional_sports_team/draft_picks./sports/sports_league_draft_pick/school	/m/01jpqb
/m/0h08p	/music/genre/artists	/m/0140t7
/m/0lbl6	/base/aareas/schema/administrative_area/administrative_parent	/m/0d05w3
/m/062zm5h	/film/film/release_date_s./film/film_regional_release_date/film_release_region	/m/06t2t
/m/0k_q_	/location/hud_county_place/county	/m/0kpys
/m/02kxwk	/award/award_nominee/award_nominations./award/award_nomination/award_nominee	/m/02lxj_
/m/021dvj	/music/genre/artists	/m/01vyp_
/m/015c4g	/award/award_nominee/award_nominations./award/award_nomination/nominated_for	/m/04j13sx
/m/09gb9xh	/award/award_nominee/award_nominations./award/award_nomination/nominated_for	/m/07vqnc
/m/0gyh2wm	/film/film/release_date_s./film/film_regional_release_date/film_regional_debut_venue	/m/0j63cyr
/m/04nfpk	/sports/sports_position/players./sports/sports_team_roster/team	/m/07l2m
/m/05bp8g	/people/person/place_of_birth	/m/07dfk
/m/0h1nt	/award/award_nominee/award_nominations./award/award_nomination/nominated_for	/m/0qm9n
/m/05p9_ql	/tv/tv_program/regular_cast./tv/regular_tv_appearance/actor	/m/01dy7j
/m/04t2l2	/award/award_winner/awards_won./award/award_honor/award_winner	/m/0cl0bk
/m/0lgsq	/people/person/profession	/m/016z4k
/m/041rx	/people/ethnicity/people	/m/0m66w
/m/0pj9t	/people/person/gender	/m/05zppz
/m/01qbl	/music/performance_role/track_performances./music/track_contribution/role	/m/0dwt5
/m/05lb87	/people/person/spouse_s./people/marriage/type_of_union	/m/04ztj
/m/04kxsb	/award/award_category/nominees./award/award_nomination/nominated_for	/m/011yqc
/m/0gfh84d	/film/film/language	/m/02h40lc
/m/02qdymm	/people/person/profession	/m/0dxtg
/m/034bgm	/film/actor/film./film/performance/film	/m/05sns6
/m/08w7vj	/people/person/gender	/m/05zppz
/m/0bkj86	/education/educational_degree/people_with_this_degree./education/education/institution	/m/01qrb2
/m/0f7hw	/film/film/language	/m/02h40lc
/m/07jnt	/film/film/genre	/m/07s9rl0
/m/0m66w	/base/popstra/celebrity/friendship./base/popstra/friendship/participant	/m/01pcdn
/m/0nppc	/location/location/adjoin_s./location/adjoining_relationship/adjoins	/m/0nf3h
/m/028tv0	/music/performance_role/regular_performances./music/group_membership/role	/m/0l14qv
/m/03t0k1	/award/award_winner/awards_won./award/award_honor/award_winner	/m/01tspc6
/m/07yvsn	/film/film/other_crew./film/film_crew_gig/film_crew_role	/m/020xn5
/m/0ym17	/education/educational_institution/students_graduates./education/education/student	/m/07g2b
/m/079vf	/film/actor/film./film/performance/film	/m/0dnkmq
/m/02z3zp	/film/actor/film./film/performance/film	/m/05qbckf
/m/0ddjy	/award/award_winning_work/awards_won./award/award_honor/award_winner	/m/03h26tm
/m/017v3q	/education/educational_institution/students_graduates./education/education/student	/m/07cbs
/m/02qyv3h	/film/film/release_date_s./film/film_regional_release_date/film_release_region	/m/06npd
/m/02lfns	/award/award_winner/awards_won./award/award_honor/award_winner	/m/02l6dy
/m/09qvc0	/award/award_category/winners./award/award_honor/award_winner	/m/027l0b
/m/01rwcgb	/people/person/profession	/m/0nbcg
/m/016s0m	/music/artist/origin	/m/01sn3
/m/0ny1p	/base/aareas/schema/administrative_area/capital	/m/014vm4
/m/0d1qmz	/film/film/language	/m/06b_j
/m/0192l	/music/performance_role/regular_performances./music/group_membership/role	/m/02sgy
/m/0fhp9	/travel/travel_destination/climate./travel/travel_destination_monthly_climate/month	/m/05cw8
/m/0dzc16	/award/award_nominee/award_nominations./award/award_nomination/award	/m/02nhxf
/m/0bx8pn	/organization/endowed_organization/endowment./measurement_unit/dated_money_value/currency	/m/09nqf
/m/0292qb	/film/film/music	/m/02jxkw
/m/0j46b	/soccer/football_team/current_roster./soccer/football_roster_position/position	/m/0dgrmp
/m/03_hd	/influence/influence_node/influenced_by	/m/0tfc
/m/0jgld	/location/statistical_region/rent50_2./measurement_unit/dated_money_value/currency	/m/09nqf
/m/0dyztm	/award/award_winner/awards_won./award/award_honor/award_winner	/m/027dtv3
/m/032jlh	/soccer/football_team/current_roster./sports/sports_team_roster/position	/m/0dgrmp
/m/01xhh5	/people/ethnicity/geographic_distribution	/m/05b7q
/m/01xqw	/music/performance_role/track_performances./music/track_contribution/role	/m/04q7r
/m/03vrp	/influence/influence_node/influenced_by	/m/07ym0
/m/016jny	/music/genre/artists	/m/01kcms4
/m/0x67	/people/ethnicity/people	/m/03j0br4
/m/08hhm6	/people/person/profession	/m/0dxtg
/m/0dl5d	/music/genre/artists	/m/04m2zj
/m/070xg	/sports/professional_sports_team/draft_picks./sports/sports_league_draft_pick/draft	/m/02qw1zx
/m/01n5309	/influence/influence_node/influenced_by	/m/0bqs56
/m/0gy7bj4	/film/film/release_date_s./film/film_regional_release_date/film_release_region	/m/06f32
/m/0rt80	/location/location/time_zones	/m/02hcv8
/m/0n0bp	/film/film/genre	/m/07s9rl0
/m/04ymln	/music/genre/parent_genre	/m/02z7f3
/m/02_j1w	/sports/sports_position/players./sports/sports_team_roster/team	/m/0d_q40
/m/0c4b8	/military/military_combatant/military_conflicts./military/military_combatant_group/combatants	/m/0chghy
/m/0gkvb7	/award/award_category/winners./award/award_honor/award_winner	/m/015882
/m/01r97z	/film/film/distributors./film/film_film_distributor_relationship/film_distribution_medium	/m/0dq6p
/m/0gtvrv3	/film/film/release_date_s./film/film_regional_release_date/film_release_region	/m/0f8l9c
/m/04t061	/music/record_label/artist	/m/02b25y
/m/0gr4k	/award/award_category/winners./award/award_honor/ceremony	/m/05q7cj
/m/01t8399	/people/person/spouse_s./people/marriage/type_of_union	/m/04ztj
/m/0qb0j	/location/location/contains	/m/01l3s0
/m/0hw1j	/award/award_nominee/award_nominations./award/award_nomination/award_nominee	/m/07s93v
/m/067pl7	/award/award_nominee/award_nominations./award/award_nomination/award_nominee	/m/07rd7
/m/01lyv	/music/genre/artists	/m/044k8
/m/09k34g	/soccer/football_team/current_roster./soccer/football_roster_position/position	/m/0dgrmp
/m/01ww_vs	/people/person/gender	/m/05zppz
/m/03m5y9p	/film/film/other_crew./film/film_crew_gig/film_crew_role	/m/0ch6mp2
/m/01gg59	/people/person/profession	/m/028kk_
/m/07s9rl0	/media_common/netflix_genre/titles	/m/03hp2y1
/m/0crvfq	/award/award_nominee/award_nominations./award/award_nomination/award_nominee	/m/01zg98
/m/048wrb	/award/award_nominee/award_nominations./award/award_nomination/award_nominee	/m/0cj2k3
/m/016wyn	/education/educational_institution/school_type	/m/01rs41
/m/018n6m	/music/artist/origin	/m/0mn8t
/m/05tk7y	/award/award_nominee/award_nominations./award/award_nomination/award_nominee	/m/0m2wm
/m/0126y2	/people/person/profession	/m/0n1h
/m/0m2wm	/award/award_nominee/award_nominations./award/award_nomination/award_nominee	/m/0993r
/m/02bn75	/award/award_nominee/award_nominations./award/award_nomination/award	/m/0gqz2
/m/0d07j8	/people/person/gender	/m/05zppz
/m/04gc65	/film/actor/film./film/performance/film	/m/03m5y9p
/m/083q7	/people/person/employment_history./business/employment_tenure/company	/m/01g7_r
/m/0fqjhm	/people/person/gender	/m/05zppz
/m/048wrb	/award/award_winner/awards_won./award/award_honor/award_winner	/m/04t2l2
/m/046fz5	/soccer/football_team/current_roster./soccer/football_roster_position/position	/m/0dgrmp
/m/018ctl	/olympics/olympic_games/participating_countries	/m/04g61
/m/07s9rl0	/media_common/netflix_genre/titles	/m/04smdd
/m/0c3ybss	/film/film/other_crew./film/film_crew_gig/film_crew_role	/m/09zzb8
/m/02lvtb	/people/person/gender	/m/05zppz
/m/02g87m	/people/person/spouse_s./people/marriage/type_of_union	/m/04ztj
/m/07h07	/award/award_winner/awards_won./award/award_honor/award_winner	/m/04cw0j
/m/0k4fz	/film/film/release_date_s./film/film_regional_release_date/film_release_region	/m/0h7x
/m/03yj_0n	/award/award_winner/awards_won./award/award_honor/award_winner	/m/02l6dy
/m/0gyfp9c	/film/film/release_date_s./film/film_regional_release_date/film_release_region	/m/0jgd
/m/0dgrmp	/sports/sports_position/players./sports/sports_team_roster/team	/m/09cvbq
/m/040z9	/film/actor/film./film/performance/film	/m/0qmhk
/m/02bqxb	/film/film/genre	/m/0g092b
/m/01gw4f	/film/actor/film./film/performance/film	/m/0140g4
/m/012cj0	/people/person/gender	/m/05zppz
/m/02h3tp	/people/deceased_person/place_of_death	/m/030qb3t
/m/01dzg0	/organization/endowed_organization/endowment./measurement_unit/dated_money_value/currency	/m/09nqf
/m/0d9qmn	/soccer/football_team/current_roster./sports/sports_team_roster/position	/m/0dgrmp
/m/018ym2	/location/location/time_zones	/m/03plfd
/m/03x3wf	/award/award_category/winners./award/award_honor/ceremony	/m/09n4nb
/m/02h4rq6	/education/educational_degree/people_with_this_degree./education/education/major_field_of_study	/m/02lp1
/m/01r97z	/award/award_winning_work/awards_won./award/award_honor/award_winner	/m/019pm_
/m/0gkz15s	/film/film/release_date_s./film/film_regional_release_date/film_release_region	/m/047yc
/m/048lv	/award/award_winner/awards_won./award/award_honor/award_winner	/m/02bj6k
/m/054ks3	/award/award_category/winners./award/award_honor/award_winner	/m/01vs_v8
/m/02j9z	/location/location/contains	/m/015wy_
/m/019r_1	/people/person/profession	/m/0dxtg
/m/0gtvrv3	/film/film/release_date_s./film/film_regional_release_date/film_release_region	/m/0chghy
/m/03rwng	/award/award_nominee/award_nominations./award/award_nomination/nominated_for	/m/0330r
/m/02qm5j	/music/genre/artists	/m/07bzp
/m/017gl1	/film/film/release_date_s./film/film_regional_release_date/film_release_region	/m/03rjj
/m/02l7c8	/media_common/netflix_genre/titles	/m/09z2b7
/m/01z7_f	/people/person/spouse_s./people/marriage/location_of_ceremony	/m/02hrh0_
/m/060j8b	/award/award_nominee/award_nominations./award/award_nomination/award_nominee	/m/0cl0bk
/m/04kxsb	/award/award_category/winners./award/award_honor/award_winner	/m/039bp
/m/02nx2k	/film/film/estimated_budget./measurement_unit/dated_money_value/currency	/m/09nqf
/m/019nnl	/tv/tv_program/regular_cast./tv/regular_tv_appearance/actor	/m/021yw7
/m/02_j1w	/sports/sports_position/players./sports/sports_team_roster/team	/m/03mp37
/m/01817f	/people/person/spouse_s./people/marriage/type_of_union	/m/04ztj
/m/02dlh2	/music/performance_role/regular_performances./music/group_membership/group	/m/03c3yf
/m/0fq117k	/award/award_nominee/award_nominations./award/award_nomination/award	/m/01ckcd
/m/01k_mc	/award/award_winner/awards_won./award/award_honor/award_winner	/m/03t852
/m/01ycfv	/award/award_nominee/award_nominations./award/award_nomination/award_nominee	/m/01bczm
/m/03h610	/award/award_nominee/award_nominations./award/award_nomination/award	/m/0fhpv4
/m/01g969	/base/popstra/celebrity/dated./base/popstra/dated/participant	/m/0cwtm
/m/05ldxl	/film/film/release_date_s./film/film_regional_release_date/film_release_region	/m/0chghy
/m/0451j	/people/person/nationality	/m/06t2t
/m/01bgqh	/award/award_category/winners./award/award_honor/award_winner	/m/03d2k
/m/034bgm	/award/award_nominee/award_nominations./award/award_nomination/award	/m/0gr4k
/m/059_c	/location/location/contains	/m/0n6nl
/m/0gl6f	/education/educational_institution/colors	/m/019sc
/m/0126y2	/film/actor/film./film/performance/film	/m/03l6q0
/m/01r7pq	/people/person/profession	/m/016z4k
/m/0gr4k	/award/award_category/nominees./award/award_nomination/nominated_for	/m/0kvgnq
/m/0c38gj	/film/film/other_crew./film/film_crew_gig/film_crew_role	/m/0ch6mp2
/m/016s0m	/people/person/places_lived./people/place_lived/location	/m/01sn3
/m/055td_	/film/film/other_crew./film/film_crew_gig/film_crew_role	/m/0dxtw
/m/01lyv	/music/genre/parent_genre	/m/02fhtq
/m/01l_yg	/people/person/spouse_s./people/marriage/type_of_union	/m/04ztj
/m/06zpgb2	/soccer/football_team/current_roster./sports/sports_team_roster/position	/m/0dgrmp
/m/01gsry	/government/legislative_session/members./government/government_position_held/district_represented	/m/05fjf
/m/0227vl	/base/schemastaging/person_extra/net_worth./measurement_unit/dated_money_value/currency	/m/09nqf
/m/049_zz	/award/award_winner/awards_won./award/award_honor/award_winner	/m/03ldxq
/m/01dw_f	/award/award_nominee/award_nominations./award/award_nomination/award	/m/054ks3
/m/0ljbg	/soccer/football_team/current_roster./soccer/football_roster_position/position	/m/02_j1w
/m/01q4qv	/people/person/spouse_s./people/marriage/type_of_union	/m/04ztj
/m/0bs5k8r	/film/film/other_crew./film/film_crew_gig/film_crew_role	/m/09vw2b7
/m/0d1t3	/olympics/olympic_sport/athletes./olympics/olympic_athlete_affiliation/country	/m/04wgh
/m/014g91	/people/person/places_lived./people/place_lived/location	/m/0h6l4
/m/022jr5	/organization/organization/headquarters./location/mailing_address/citytown	/m/0j8p6
/m/04h4c9	/film/film/estimated_budget./measurement_unit/dated_money_value/currency	/m/09nqf
/m/02lgfh	/award/award_nominee/award_nominations./award/award_nomination/award_nominee	/m/02lf70
/m/063fh9	/film/film/story_by	/m/01wd02c
/m/0hnkp	/people/person/religion	/m/0c8wxp
/m/05567m	/film/film/production_companies	/m/024rgt
/m/035dk	/olympics/olympic_participating_country/medals_won./olympics/olympic_medal_honor/olympics	/m/0lbbj
/m/0f4_l	/award/award_winning_work/awards_won./award/award_honor/award	/m/02rdxsh
/m/09xrxq	/award/award_winner/awards_won./award/award_honor/award_winner	/m/01nfys
/m/03_44z	/base/x2010fifaworldcupsouthafrica/world_cup_squad/current_world_cup_squad./base/x2010fifaworldcupsouthafrica/current_world_cup_squad/current_club	/m/05z01
/m/02hp6p	/education/university/domestic_tuition./measurement_unit/dated_money_value/currency	/m/09nqf
/m/03t97y	/film/film/other_crew./film/film_crew_gig/crewmember	/m/051z6rz
/m/015c4g	/film/actor/film./film/performance/film	/m/02_nsc
/m/03cvwkr	/film/film/cinematography	/m/0280mv7
/m/01gg59	/award/award_nominee/award_nominations./award/award_nomination/award	/m/054krc
/m/09qwmm	/award/award_category/winners./award/award_honor/ceremony	/m/027hjff
/m/01b7lc	/business/business_operation/operating_income./measurement_unit/dated_money_value/currency	/m/09nqf
/m/0bwfwpj	/film/film/release_date_s./film/film_regional_release_date/film_release_region	/m/03rk0
/m/0gl02yg	/film/film/release_date_s./film/film_regional_release_date/film_release_region	/m/0d0vqn
/m/049_zz	/people/person/spouse_s./people/marriage/type_of_union	/m/04ztj
/m/02rxbmt	/people/person/gender	/m/05zppz
/m/04ztj	/people/marriage_union_type/unions_of_this_type./people/marriage/location_of_ceremony	/m/022_6
/m/02p8v8	/people/person/gender	/m/05zppz
/m/01k3qj	/people/person/languages	/m/03_9r
/m/037njl	/organization/non_profit_organization/registered_with./organization/non_profit_registration/registering_agency	/m/03z19
/m/047gpsd	/film/film/other_crew./film/film_crew_gig/film_crew_role	/m/02r96rf
/m/0408m53	/film/film/language	/m/02h40lc
/m/0hw1j	/award/award_nominee/award_nominations./award/award_nomination/award	/m/04dn09n
/m/048vhl	/film/film/other_crew./film/film_crew_gig/crewmember	/m/0b79gfg
/m/01xwv7	/people/person/spouse_s./people/marriage/type_of_union	/m/04ztj
/m/0gyfp9c	/film/film/release_date_s./film/film_regional_release_date/film_release_region	/m/05b4w
/m/06jkm	/influence/influence_node/peers./influence/peer_relationship/peers	/m/05gpy
/m/06ylv0	/soccer/football_team/current_roster./soccer/football_roster_position/position	/m/02_j1w
/m/01dzz7	/influence/influence_node/influenced_by	/m/09dt7
/m/0dc_ms	/film/film/release_date_s./film/film_regional_release_date/film_release_region	/m/07f1x
/m/0cm2xh	/military/military_conflict/combatants./military/military_combatant_group/combatants	/m/0ctw_b
/m/07nxvj	/film/film/film_format	/m/07fb8_
/m/034qrh	/film/film/genre	/m/05p553
/m/01q940	/music/record_label/artist	/m/01vxlbm
/m/0b1f49	/award/award_nominee/award_nominations./award/award_nomination/award_nominee	/m/0c7t58
/m/0hw1j	/award/award_nominee/award_nominations./award/award_nomination/award	/m/0gr4k
/m/015v3r	/people/person/spouse_s./people/marriage/spouse	/m/0kjrx
/m/0cqhk0	/award/award_category/winners./award/award_honor/award_winner	/m/0266r6h
/m/02_j1w	/sports/sports_position/players./sports/sports_team_roster/team	/m/07sqnh
/m/06cgy	/people/person/spouse_s./people/marriage/type_of_union	/m/04ztj
/m/08_vwq	/award/award_category/winners./award/award_honor/award_winner	/m/01w0yrc
/m/012ycy	/music/artist/track_contributions./music/track_contribution/role	/m/01vdm0
/m/04dn09n	/award/award_category/nominees./award/award_nomination/nominated_for	/m/0hvvf
/m/046b0s	/award/award_nominee/award_nominations./award/award_nomination/nominated_for	/m/060v34
/m/0dgrmp	/sports/sports_position/players./sports/sports_team_roster/team	/m/01r5xw
/m/0fp_xp	/soccer/football_player/current_team./sports/sports_team_roster/team	/m/02b10w
/m/0171lb	/people/person/spouse_s./people/marriage/type_of_union	/m/04ztj
/m/039bp	/people/person/place_of_birth	/m/0r4qq
/m/0gx1673	/award/award_ceremony/awards_presented./award/award_honor/award_winner	/m/06x4l_
/m/016yvw	/award/award_nominee/award_nominations./award/award_nomination/award_nominee	/m/01jw4r
/m/03xf_m	/film/film/other_crew./film/film_crew_gig/film_crew_role	/m/0ch6mp2
/m/064ndc	/film/film/produced_by	/m/0bgrsl
/m/01pbxb	/award/award_nominee/award_nominations./award/award_nomination/award	/m/0gqz2
/m/01gglm	/film/film/other_crew./film/film_crew_gig/film_crew_role	/m/0dxtw
/m/09sdmz	/award/award_category/nominees./award/award_nomination/nominated_for	/m/02yxbc
/m/011yph	/film/film/production_companies	/m/016tt2
/m/022s1m	/people/person/profession	/m/0np9r
/m/0828jw	/award/award_winning_work/awards_won./award/award_honor/award_winner	/m/01xndd
/m/03fbb6	/award/award_nominee/award_nominations./award/award_nomination/award	/m/09qvc0
/m/0y_pg	/film/film/genre	/m/05p553
/m/02_j1w	/sports/sports_position/players./sports/sports_team_roster/team	/m/042l8n
/m/014mlp	/education/educational_degree/people_with_this_degree./education/education/institution	/m/09hgk
/m/084l5	/sports/sports_team/roster./american_football/football_historical_roster_position/position_s	/m/05zm34
/m/0401sg	/film/film/release_date_s./film/film_regional_release_date/film_release_region	/m/0jgd
/m/01pcj4	/education/educational_institution/students_graduates./education/education/student	/m/0kbg6
/m/0chghy	/olympics/olympic_participating_country/athletes./olympics/olympic_athlete_affiliation/olympics	/m/018ctl
/m/0cq4k_	/soccer/football_team/current_roster./sports/sports_team_roster/position	/m/02_j1w
/m/04wgh	/location/statistical_region/gdp_nominal_per_capita./measurement_unit/dated_money_value/currency	/m/09nqf
/m/0f4_l	/film/film/other_crew./film/film_crew_gig/film_crew_role	/m/09vw2b7
/m/03lty	/music/genre/artists	/m/03sww
/m/0nk3g	/music/genre/artists	/m/01pq5j7
/m/04dn09n	/award/award_category/nominees./award/award_nomination/nominated_for	/m/0sxmx
/m/02l424	/education/educational_institution/students_graduates./education/education/major_field_of_study	/m/0g26h
/m/0kvbl6	/film/film/other_crew./film/film_crew_gig/film_crew_role	/m/01pvkk
/m/0dbns	/education/educational_institution/students_graduates./education/education/student	/m/05g3ss
/m/057wlm	/organization/organization/headquarters./location/mailing_address/state_province_region	/m/06yxd
/m/02w4v	/music/genre/artists	/m/01wz3cx
/m/0161h5	/award/award_nominee/award_nominations./award/award_nomination/nominated_for	/m/0ckrnn
/m/01hvv0	/tv/tv_program/languages	/m/02h40lc
/m/02krdz	/film/film/estimated_budget./measurement_unit/dated_money_value/currency	/m/09nqf
/m/0265v21	/people/person/profession	/m/0dxtg
/m/04smdd	/film/film/genre	/m/0vgkd
/m/05r3qc	/film/film/personal_appearances./film/personal_film_appearance/person	/m/046lt
/m/02mmwk	/film/film/estimated_budget./measurement_unit/dated_money_value/currency	/m/09nqf
/m/05dbyt	/film/actor/film./film/performance/film	/m/040_lv
/m/02lz1s	/people/person/profession	/m/0nbcg
/m/080_y	/soccer/football_team/current_roster./sports/sports_team_roster/position	/m/02_j1w
/m/01wj18h	/award/award_nominee/award_nominations./award/award_nomination/award	/m/02f777
/m/036hf4	/award/award_nominee/award_nominations./award/award_nomination/award_nominee	/m/01w9wwg
/m/0dgrmp	/sports/sports_position/players./sports/sports_team_roster/team	/m/042rlf
/m/01w7nwm	/base/schemastaging/person_extra/net_worth./measurement_unit/dated_money_value/currency	/m/09nqf
/m/016jny	/music/genre/artists	/m/04mky3
/m/06jwys	/soccer/football_team/current_roster./soccer/football_roster_position/position	/m/0dgrmp
/m/03rk0	/location/location/contains	/m/055vr
/m/016gkf	/award/award_nominee/award_nominations./award/award_nomination/award	/m/0bdwqv
/m/01rhl	/music/performance_role/track_performances./music/track_contribution/role	/m/04q7r
/m/04g5k	/olympics/olympic_participating_country/medals_won./olympics/olympic_medal_honor/olympics	/m/018ctl
/m/01dw4q	/award/award_winner/awards_won./award/award_honor/award_winner	/m/05lb87
/m/0147dk	/award/award_nominee/award_nominations./award/award_nomination/nominated_for	/m/06rhz7
/m/03xgm3	/award/award_winner/awards_won./award/award_honor/award_winner	/m/07z542
/m/02g8mp	/award/award_category/winners./award/award_honor/award_winner	/m/02_jkc
/m/0c1pj	/award/award_nominee/award_nominations./award/award_nomination/nominated_for	/m/01br2w
/m/0n4mk	/location/location/time_zones	/m/02hcv8
/m/02fbpz	/people/person/places_lived./people/place_lived/location	/m/0fl2s
/m/0g48m4	/people/ethnicity/people	/m/0dzc16
/m/09gdm7q	/film/film/language	/m/02h40lc
/m/017n9	/film/film/other_crew./film/film_crew_gig/film_crew_role	/m/09zzb8
/m/034cm	/dataworld/gardening_hint/split_to	/m/014tss
/m/01vvycq	/people/person/profession	/m/0nbcg
/m/02lxj_	/people/person/place_of_birth	/m/06_kh
/m/041rx	/people/ethnicity/people	/m/05cx7x
/m/02rzmzk	/people/person/places_lived./people/place_lived/location	/m/09c6w
/m/01npw8	/organization/organization/headquarters./location/mailing_address/state_province_region	/m/059_c
/m/03ln8b	/award/award_winning_work/awards_won./award/award_honor/award_winner	/m/05lb65
/m/07tds	/education/educational_institution/students_graduates./education/education/student	/m/0b455l
/m/026s90	/music/record_label/artist	/m/01k_n63
/m/041rx	/people/ethnicity/people	/m/0jdhp
/m/0pkgt	/people/person/profession	/m/0nbcg
/m/017gl1	/film/film/release_date_s./film/film_regional_release_date/film_release_region	/m/0ctw_b
/m/0mwxz	/location/location/time_zones	/m/02hcv8
/m/040db	/people/person/profession	/m/0cbd2
/m/01vvydl	/award/award_nominee/award_nominations./award/award_nomination/award_nominee	/m/018n6m
/m/052hl	/award/award_nominee/award_nominations./award/award_nomination/nominated_for	/m/07tw_b
/m/03dctt	/award/award_nominee/award_nominations./award/award_nomination/award	/m/0b6k___
/m/01n7q	/location/location/contains	/m/0r2l7
/m/037n97	/music/genre/artists	/m/01wg6y
/m/06qgvf	/people/person/places_lived./people/place_lived/location	/m/030qb3t
/m/0343h	/award/award_nominee/award_nominations./award/award_nomination/award_nominee	/m/0kx4m
/m/02ppg1r	/tv/tv_program/regular_cast./tv/regular_tv_appearance/actor	/m/0kryqm
/m/0l14j_	/music/performance_role/guest_performances./music/recording_contribution/performance_role	/m/0l14md
/m/040njc	/award/award_category/nominees./award/award_nomination/nominated_for	/m/08nvyr
/m/02lm0t	/base/schemastaging/person_extra/net_worth./measurement_unit/dated_money_value/currency	/m/09nqf
/m/0gkr9q	/award/award_category/nominees./award/award_nomination/nominated_for	/m/0828jw
/m/0150t6	/people/person/spouse_s./people/marriage/type_of_union	/m/04ztj
/m/05mt6w	/award/award_nominee/award_nominations./award/award_nomination/award	/m/025m8y
/m/02glc4	/government/legislative_session/members./government/government_position_held/legislative_sessions	/m/07p__7
/m/0fxky3	/award/award_nominee/award_nominations./award/award_nomination/award_nominee	/m/06w58f
/m/046fz5	/soccer/football_team/current_roster./soccer/football_roster_position/position	/m/02_j1w
/m/0gzlb9	/film/film/executive_produced_by	/m/0ksf29
/m/0dgrmp	/sports/sports_position/players./sports/sports_team_roster/team	/m/044p4_
/m/0bqs56	/influence/influence_node/influenced_by	/m/0p_pd
/m/072bb1	/award/award_nominee/award_nominations./award/award_nomination/award_nominee	/m/04t2l2
/m/03ts0c	/people/ethnicity/people	/m/06b_0
/m/0b4lkx	/film/film/genre	/m/07s9rl0
/m/0jkhr	/organization/endowed_organization/endowment./measurement_unit/dated_money_value/currency	/m/09nqf
/m/01gz9n	/people/deceased_person/place_of_death	/m/030qb3t
/m/0kvbl6	/award/award_winning_work/awards_won./award/award_honor/award	/m/05q8pss
/m/03_0p	/award/award_nominee/award_nominations./award/award_nomination/award_nominee	/m/0127gn
/m/01ycfv	/award/award_nominee/award_nominations./award/award_nomination/award_nominee	/m/04rcr
/m/01gst_	/government/legislative_session/members./government/government_position_held/legislative_sessions	/m/01gsrl
/m/0157m	/people/person/spouse_s./people/marriage/spouse	/m/0d06m5
/m/05l0j5	/award/award_nominee/award_nominations./award/award_nomination/award_nominee	/m/072bb1
/m/01gst9	/government/legislative_session/members./government/government_position_held/legislative_sessions	/m/01gsry
/m/01wqlc	/music/genre/artists	/m/01k47c
/m/023r2x	/music/performance_role/track_performances./music/track_contribution/role	/m/011_6p
/m/09th87	/sports/sports_league_draft/picks./sports/sports_league_draft_pick/school	/m/0dzst
/m/01ggc9	/people/person/places_lived./people/place_lived/location	/m/030qb3t
/m/01qwb5	/education/educational_institution/colors	/m/067z2v
/m/0151w_	/award/award_winner/awards_won./award/award_honor/award_winner	/m/01y9xg
/m/05sns6	/film/film/other_crew./film/film_crew_gig/film_crew_role	/m/09vw2b7
/m/09qwmm	/award/award_category/nominees./award/award_nomination/nominated_for	/m/04xg2f
/m/0ywqc	/film/actor/film./film/performance/film	/m/09p4w8
/m/02cl1	/travel/travel_destination/how_to_get_here./travel/transportation/mode_of_transportation	/m/01bjv
/m/087qxp	/award/award_nominee/award_nominations./award/award_nomination/award_nominee	/m/01j7rd
/m/01nn3m	/people/person/profession	/m/0nbcg
/m/0413cff	/film/film/genre	/m/07s9rl0
/m/05p09zm	/award/award_category/nominees./award/award_nomination/nominated_for	/m/0gwgn1k
/m/02_xgp2	/education/educational_degree/people_with_this_degree./education/education/institution	/m/04hgpt
/m/09v3jyg	/film/film/release_date_s./film/film_regional_release_date/film_release_region	/m/03gj2
/m/05p09zm	/award/award_category/winners./award/award_honor/award_winner	/m/07ldhs
/m/03zj_3	/soccer/football_team/current_roster./soccer/football_roster_position/position	/m/0dgrmp
/m/026gyn_	/film/film/language	/m/02h40lc
/m/0l14j_	/music/instrument/family	/m/085jw
/m/047p7fr	/film/film/release_date_s./film/film_regional_release_date/film_release_region	/m/03rjj
/m/04gp58p	/film/film/other_crew./film/film_crew_gig/film_crew_role	/m/0ch6mp2
/m/01hww_	/music/performance_role/track_performances./music/track_contribution/role	/m/0jtg0
/m/05mt6w	/award/award_nominee/award_nominations./award/award_nomination/award_nominee	/m/01pbxb
/m/0127m7	/film/actor/film./film/performance/film	/m/0y_9q
/m/027pfg	/film/film/release_date_s./film/film_regional_release_date/film_release_region	/m/06c1y
/m/06b_0	/award/award_nominee/award_nominations./award/award_nomination/award	/m/0gr4k
/m/0c_n9	/award/award_category/disciplines_or_subjects	/m/04g51
/m/0pvms	/film/film/other_crew./film/film_crew_gig/film_crew_role	/m/09zzb8
/m/02_xgp2	/education/educational_degree/people_with_this_degree./education/education/student	/m/01tdnyh
/m/0gh65c5	/film/film/release_date_s./film/film_regional_release_date/film_release_region	/m/04gzd
/m/021_rm	/award/award_nominee/award_nominations./award/award_nomination/award_nominee	/m/01z7_f
/m/01pbs9w	/award/award_nominee/award_nominations./award/award_nomination/award	/m/0gqz2
/m/01q940	/music/record_label/artist	/m/01l1sq
/m/0by17xn	/film/film/genre	/m/09blyk
/m/0j210	/music/performance_role/regular_performances./music/group_membership/role	/m/07brj
/m/03205_	/education/educational_institution/school_type	/m/01rs41
/m/0bs8d	/award/award_nominee/award_nominations./award/award_nomination/award	/m/01l78d
/m/0789_m	/award/award_category/winners./award/award_honor/award_winner	/m/03k7bd
/m/01yc02	/business/job_title/people_with_this_title./business/employment_tenure/company	/m/0gy1_
/m/0bynt	/olympics/olympic_sport/athletes./olympics/olympic_athlete_affiliation/country	/m/02kcz
/m/03rjj	/location/location/contains	/m/03tm68
/m/02y_2y	/film/actor/film./film/performance/film	/m/07l450
/m/03ntbmw	/film/film/other_crew./film/film_crew_gig/film_crew_role	/m/0ch6mp2
/m/03x3wf	/award/award_category/winners./award/award_honor/award_winner	/m/014g91
/m/017jd9	/award/award_winning_work/awards_won./award/award_honor/award_winner	/m/02ck7w
/m/02dwj	/film/film/genre	/m/07s9rl0
/m/03gj2	/location/statistical_region/gdp_nominal./measurement_unit/dated_money_value/currency	/m/09nqf
/m/03x23q	/education/educational_institution/colors	/m/019sc
/m/01qbl	/music/performance_role/track_performances./music/track_contribution/role	/m/01vdm0
/m/01qvgl	/award/award_nominee/award_nominations./award/award_nomination/award	/m/02x17c2
/m/02cvcd	/organization/endowed_organization/endowment./measurement_unit/dated_money_value/currency	/m/09nqf
/m/04wg38	/people/person/religion	/m/0c8wxp
/m/0p17j	/people/person/places_lived./people/place_lived/location	/m/0281y0
/m/015882	/award/award_nominee/award_nominations./award/award_nomination/award	/m/01bgqh
/m/01b1mj	/organization/endowed_organization/endowment./measurement_unit/dated_money_value/currency	/m/09nqf
/m/04kxsb	/award/award_category/nominees./award/award_nomination/nominated_for	/m/02q56mk
/m/03f3yfj	/award/award_nominee/award_nominations./award/award_nomination/award	/m/05zkcn5
/m/014zn0	/people/person/gender	/m/05zppz
/m/07r4c	/people/person/profession	/m/0nbcg
/m/07jqjx	/film/film/release_date_s./film/film_regional_release_date/film_release_region	/m/03gj2
/m/01dhmw	/award/award_nominee/award_nominations./award/award_nomination/award	/m/0262x6
/m/01gst_	/government/legislative_session/members./government/government_position_held/legislative_sessions	/m/01grrf
/m/04lqvly	/film/film/other_crew./film/film_crew_gig/film_crew_role	/m/02r96rf
/m/04zwjd	/award/award_nominee/award_nominations./award/award_nomination/award	/m/0gqz2
/m/01w_d6	/soccer/football_team/current_roster./sports/sports_team_roster/position	/m/0dgrmp
/m/01p4vl	/people/person/spouse_s./people/marriage/spouse	/m/019pm_
/m/0h1cdwq	/film/film/release_date_s./film/film_regional_release_date/film_release_region	/m/0d0vqn
/m/03z20c	/film/film/genre	/m/02l7c8
/m/01q940	/organization/organization/headquarters./location/mailing_address/citytown	/m/0chgzm
/m/03cvwkr	/film/film/release_date_s./film/film_regional_release_date/film_release_region	/m/0f8l9c
/m/031k24	/film/actor/film./film/performance/film	/m/0b76kw1
/m/01y9r2	/film/film/other_crew./film/film_crew_gig/film_crew_role	/m/0ch6mp2
/m/01xqw	/music/performance_role/regular_performances./music/group_membership/role	/m/0jtg0
/m/0crvfq	/award/award_winner/awards_won./award/award_honor/award_winner	/m/0b_dy
/m/0b2km_	/film/film/language	/m/02h40lc
/m/05ldxl	/film/film/release_date_s./film/film_regional_release_date/film_release_region	/m/082fr
/m/01k_n63	/award/award_nominee/award_nominations./award/award_nomination/award_nominee	/m/0168cl
/m/0gs96	/award/award_category/winners./award/award_honor/ceremony	/m/0c53vt
/m/0kb1g	/film/film/genre	/m/03bxz7
/m/09qwmm	/award/award_category/winners./award/award_honor/award_winner	/m/0bq2g
/m/0flw6	/people/person/profession	/m/01c72t
/m/03fhml	/soccer/football_team/current_roster./sports/sports_team_roster/position	/m/0dgrmp
/m/0mnz0	/location/location/contains	/m/010m55
/m/01zh29	/people/person/gender	/m/05zppz
/m/0m2wm	/award/award_nominee/award_nominations./award/award_nomination/award_nominee	/m/06mmb
/m/037njl	/business/business_operation/operating_income./measurement_unit/dated_money_value/currency	/m/09nqf
/m/01gt99	/government/legislative_session/members./government/government_position_held/district_represented	/m/05k7sb
/m/016nvh	/people/person/gender	/m/05zppz
/m/02yvct	/film/film/release_date_s./film/film_regional_release_date/film_release_region	/m/03gj2
/m/0b76d_m	/film/film/release_date_s./film/film_regional_release_date/film_release_region	/m/047yc
/m/03qlv7	/music/performance_role/regular_performances./music/group_membership/role	/m/01v1d8
/m/06szd3	/award/hall_of_fame/inductees./award/hall_of_fame_induction/inductee	/m/024swd
/m/02qyxs5	/award/award_category/nominees./award/award_nomination/nominated_for	/m/08s6mr
/m/0bkj86	/education/educational_degree/people_with_this_degree./education/education/student	/m/01zh29
/m/08qvhv	/award/award_winner/awards_won./award/award_honor/award_winner	/m/03xp8d5
/m/0291hr	/film/film/featured_film_locations	/m/0d6lp
/m/0dtzkt	/film/film/other_crew./film/film_crew_gig/film_crew_role	/m/01pvkk
/m/03_wj_	/award/award_winner/awards_won./award/award_honor/award_winner	/m/06bzwt
/m/03ln8b	/award/award_winning_work/awards_won./award/award_honor/award	/m/09qvf4
/m/0c3ns	/award/award_winner/awards_won./award/award_honor/award_winner	/m/0bkf72
/m/0d87hc	/film/film/other_crew./film/film_crew_gig/film_crew_role	/m/0ch6mp2
/m/09yhzs	/award/award_nominee/award_nominations./award/award_nomination/award	/m/05zvj3m
/m/01j7rd	/people/person/profession	/m/0dxtg
/m/01r7pq	/award/award_nominee/award_nominations./award/award_nomination/award_nominee	/m/02_jkc
/m/0sx5w	/people/person/gender	/m/05zppz
/m/05dxl_	/people/person/gender	/m/05zppz
/m/0bdwqv	/award/award_category/winners./award/award_honor/award_winner	/m/048q6x
/m/0b76d_m	/film/film/release_date_s./film/film_regional_release_date/film_release_region	/m/03gj2
/m/01v0fn1	/award/award_winner/awards_won./award/award_honor/award_winner	/m/01r7pq
/m/0c61p	/base/aareas/schema/administrative_area/administrative_parent	/m/03rjj
/m/05fgt1	/film/film/genre	/m/05p553
/m/0mx3k	/location/statistical_region/rent50_2./measurement_unit/dated_money_value/currency	/m/09nqf
/m/0bq0p9	/military/military_combatant/military_conflicts./military/military_combatant_group/combatants	/m/0chghy
/m/03m3mgq	/people/profession/specialization_of	/m/06q2q
/m/02kx4w	/music/genre/parent_genre	/m/03p7rp
/m/09qwmm	/award/award_category/nominees./award/award_nomination/nominated_for	/m/09z2b7
/m/01br2w	/film/film/other_crew./film/film_crew_gig/film_crew_role	/m/09zzb8
/m/0gwgn1k	/film/film/release_date_s./film/film_regional_release_date/film_release_region	/m/0f8l9c
/m/0d1tm	/olympics/olympic_sport/athletes./olympics/olympic_athlete_affiliation/country	/m/02k1b
/m/05pdh86	/film/film/release_date_s./film/film_regional_release_date/film_release_region	/m/03gj2
/m/021bk	/award/award_winner/awards_won./award/award_honor/award_winner	/m/0pgjm
/m/06dfz1	/tv/tv_program/genre	/m/07s9rl0
/m/083wr9	/people/person/gender	/m/05zppz
/m/09pnw5	/award/award_ceremony/awards_presented./award/award_honor/award_winner	/m/0m66w
/m/015t56	/award/award_nominee/award_nominations./award/award_nomination/award_nominee	/m/01d1st
/m/01vvb4m	/people/person/spouse_s./people/marriage/type_of_union	/m/04ztj
/m/0gr4k	/award/award_category/winners./award/award_honor/ceremony	/m/02ywhz
/m/03ywyk	/people/person/spouse_s./people/marriage/type_of_union	/m/04ztj
/m/076psv	/award/award_winner/awards_won./award/award_honor/award_winner	/m/0c0tzp
/m/05c0jwl	/organization/role/leaders./organization/leadership/organization	/m/07tl0
/m/01c1nm	/location/administrative_division/country	/m/03rk0
/m/0x67	/people/ethnicity/people	/m/0gbwp
/m/02h4rq6	/education/educational_degree/people_with_this_degree./education/education/institution	/m/09vzz
/m/044bn	/people/person/profession	/m/0dxtg
/m/087pfc	/film/film/estimated_budget./measurement_unit/dated_money_value/currency	/m/09nqf
/m/03h8_g	/base/schemastaging/person_extra/net_worth./measurement_unit/dated_money_value/currency	/m/09nqf
/m/0233bn	/film/film/release_date_s./film/film_regional_release_date/film_release_region	/m/06qd3
/m/03xpfzg	/people/person/profession	/m/0cbd2
/m/011k1h	/music/record_label/artist	/m/0840vq
/m/0947l	/travel/travel_destination/climate./travel/travel_destination_monthly_climate/month	/m/04wzr
/m/06dv3	/award/award_nominee/award_nominations./award/award_nomination/nominated_for	/m/0cz_ym
/m/095zvfg	/award/award_nominee/award_nominations./award/award_nomination/nominated_for	/m/049xgc
/m/02b0zt	/soccer/football_team/current_roster./sports/sports_team_roster/position	/m/0dgrmp
/m/0h7pj	/people/person/spouse_s./people/marriage/type_of_union	/m/04ztj
/m/01tspc6	/people/person/languages	/m/02h40lc
/m/03j722	/soccer/football_team/current_roster./sports/sports_team_roster/position	/m/02_j1w
/m/017z49	/film/film/release_date_s./film/film_regional_release_date/film_release_region	/m/0chghy
/m/0dszr0	/people/person/profession	/m/0np9r
/m/014mlp	/education/educational_degree/people_with_this_degree./education/education/institution	/m/01g7_r
/m/09d3b7	/award/award_winning_work/awards_won./award/award_honor/award	/m/054krc
/m/0g9wdmc	/film/film/other_crew./film/film_crew_gig/film_crew_role	/m/0ch6mp2
/m/07ghv5	/film/film/dubbing_performances./film/dubbing_performance/actor	/m/05v954
/m/09w1n	/olympics/olympic_sport/athletes./olympics/olympic_athlete_affiliation/country	/m/0f8l9c
/m/0chghy	/military/military_combatant/military_conflicts./military/military_combatant_group/combatants	/m/05qhw
/m/07swvb	/film/actor/film./film/performance/film	/m/05pdh86
/m/063hp4	/film/film/produced_by	/m/01gz9n
/m/019pm_	/award/award_nominee/award_nominations./award/award_nomination/award	/m/05p09zm
/m/01wj18h	/people/person/places_lived./people/place_lived/location	/m/030qb3t
/m/0dgrmp	/sports/sports_position/players./sports/sports_team_roster/team	/m/06jwys
/m/026mfs	/award/award_category/winners./award/award_honor/ceremony	/m/09n4nb
/m/01kgg9	/base/popstra/celebrity/friendship./base/popstra/friendship/participant	/m/0h1m9
/m/016zwt	/olympics/olympic_participating_country/athletes./olympics/olympic_athlete_affiliation/olympics	/m/06sks6
/m/02_j1w	/sports/sports_position/players./sports/sports_team_roster/team	/m/02b0zd
/m/083shs	/film/film/other_crew./film/film_crew_gig/film_crew_role	/m/02r96rf
/m/06c1y	/location/statistical_region/religions./location/religion_percentage/religion	/m/0c8wxp
/m/01xdf5	/base/schemastaging/person_extra/net_worth./measurement_unit/dated_money_value/currency	/m/09nqf
/m/0fhp9	/location/location/adjoin_s./location/adjoining_relationship/adjoins	/m/0133h8
/m/0ndsl1x	/film/film/release_date_s./film/film_regional_release_date/film_release_region	/m/0b90_r
/m/0dcz8_	/film/film/other_crew./film/film_crew_gig/film_crew_role	/m/0dxtw
/m/01j7rd	/award/award_nominee/award_nominations./award/award_nomination/award_nominee	/m/05pzdk
/m/05l8y	/base/aareas/schema/administrative_area/administrative_parent	/m/02j71
/m/0gj96ln	/film/film/release_date_s./film/film_regional_release_date/film_release_region	/m/01crd5
/m/03hfxx	/people/person/spouse_s./people/marriage/type_of_union	/m/04ztj
/m/09gdh6k	/film/film/film_festivals	/m/0bmj62v
/m/05pdd86	/film/film/other_crew./film/film_crew_gig/film_crew_role	/m/020xn5
/m/09n4nb	/award/award_ceremony/awards_presented./award/award_honor/award_winner	/m/0hl3d
/m/0d6lp	/travel/travel_destination/climate./travel/travel_destination_monthly_climate/month	/m/04wzr
/m/0295sy	/film/film/genre	/m/05p553
/m/01l7qw	/people/person/places_lived./people/place_lived/location	/m/0hyxv
/m/0319l	/music/performance_role/track_performances./music/track_contribution/role	/m/02dlh2
/m/04dqdk	/people/person/profession	/m/016z4k
/m/02h4rq6	/education/educational_degree/people_with_this_degree./education/education/institution	/m/0146hc
/m/03q43g	/people/person/spouse_s./people/marriage/type_of_union	/m/04ztj
/m/0gkr9q	/award/award_category/nominees./award/award_nomination/nominated_for	/m/07g9f
/m/0n3dv	/location/location/contains	/m/0ynfz
/m/04rwx	/organization/endowed_organization/endowment./measurement_unit/dated_money_value/currency	/m/09nqf
/m/04g51	/education/field_of_study/students_majoring./education/education/major_field_of_study	/m/04rjg
/m/0clvcx	/award/award_nominee/award_nominations./award/award_nomination/award_nominee	/m/02w9895
/m/03cglm	/award/award_nominee/award_nominations./award/award_nomination/award_nominee	/m/014v6f
/m/02xbyr	/film/film/release_date_s./film/film_regional_release_date/film_release_region	/m/03gj2
/m/01dzz7	/award/award_nominee/award_nominations./award/award_nomination/award	/m/040vk98
/m/045j3w	/film/film/release_date_s./film/film_regional_release_date/film_release_region	/m/03rjj
/m/01q_ph	/award/award_nominee/award_nominations./award/award_nomination/award	/m/05zvj3m
/m/0mbwf	/education/university/local_tuition./measurement_unit/dated_money_value/currency	/m/0ptk_
/m/01w58n3	/award/award_nominee/award_nominations./award/award_nomination/award	/m/02v703
/m/0gz6b6g	/film/film/language	/m/02h40lc
/m/0mkg	/music/performance_role/regular_performances./music/group_membership/role	/m/02g9p4
/m/019nnl	/tv/tv_program/regular_cast./tv/regular_tv_appearance/actor	/m/03jldb
/m/06182p	/organization/organization/headquarters./location/mailing_address/state_province_region	/m/01n7q
/m/0jq27	/location/capital_of_administrative_division/capital_of./location/administrative_division_capital_relationship/administrative_division	/m/0lwkz
/m/0msck	/location/statistical_region/rent50_2./measurement_unit/dated_money_value/currency	/m/09nqf
/m/042f1	/people/person/spouse_s./people/marriage/type_of_union	/m/04ztj
/m/02bqvs	/film/film/genre	/m/05p553
/m/0djbw	/people/profession/specialization_of	/m/0db79
/m/05l0j5	/award/award_nominee/award_nominations./award/award_nomination/award_nominee	/m/0cj36c
/m/0bs8hvm	/film/film/release_date_s./film/film_regional_release_date/film_release_region	/m/0f8l9c
/m/07cdz	/film/film/music	/m/02ryx0
/m/0dgrmp	/sports/sports_position/players./sports/sports_team_roster/team	/m/0520y3
/m/016tt2	/film/film_distributor/films_distributed./film/film_film_distributor_relationship/film	/m/011ysn
/m/08x5c_	/people/person/gender	/m/05zppz
/m/0kqbh	/soccer/football_team/current_roster./soccer/football_roster_position/position	/m/02_j1w
/m/0q8sw	/location/location/time_zones	/m/02fqwt
/m/02lyr4	/sports/sports_position/players./sports/sports_team_roster/team	/m/04913k
/m/0jvtp	/people/person/gender	/m/05zppz
/m/0233bn	/film/film/other_crew./film/film_crew_gig/film_crew_role	/m/02r96rf
/m/0pksh	/people/person/profession	/m/0dxtg
/m/016tt2	/film/film_distributor/films_distributed./film/film_film_distributor_relationship/film	/m/0291hr
/m/016gkf	/people/person/spouse_s./people/marriage/type_of_union	/m/04ztj
/m/0166b	/location/statistical_region/gdp_real./measurement_unit/adjusted_money_value/adjustment_currency	/m/09nqf
/m/01q4qv	/film/director/film	/m/0k20s
/m/042xrr	/award/award_nominee/award_nominations./award/award_nomination/award_nominee	/m/0blbxk
/m/014kg4	/people/person/gender	/m/05zppz
/m/026v1z	/award/award_winner/awards_won./award/award_honor/award_winner	/m/04cw0j
/m/03rjj	/location/country/form_of_government	/m/01fpfn
/m/05qbckf	/film/film/release_date_s./film/film_regional_release_date/film_release_region	/m/03rk0
/m/0x67	/people/ethnicity/people	/m/0807ml
/m/015cl6	/award/award_category/winners./award/award_honor/award_winner	/m/021sv1
/m/01kff7	/award/award_winning_work/awards_won./award/award_honor/award	/m/05q8pss
/m/02l0xc	/people/person/gender	/m/05zppz
/m/03zqc1	/award/award_nominee/award_nominations./award/award_nomination/award	/m/09qj50
/m/02d413	/film/film/production_companies	/m/030_1m
/m/087vz	/olympics/olympic_participating_country/athletes./olympics/olympic_athlete_affiliation/olympics	/m/0jhn7
/m/025m8y	/award/award_category/winners./award/award_honor/award_winner	/m/02ryx0
/m/040b5k	/film/film/release_date_s./film/film_regional_release_date/film_release_region	/m/03gj2
/m/0432_5	/film/film/release_date_s./film/film_regional_release_date/film_release_region	/m/06f32
/m/026m9w	/award/award_category/winners./award/award_honor/award_winner	/m/01wmgrf
/m/0cz_ym	/film/film/other_crew./film/film_crew_gig/film_crew_role	/m/089fss
/m/03q45x	/base/saturdaynightlive/snl_cast_member/seasons./base/saturdaynightlive/snl_season_tenure/cast_members	/m/01v3s2_
/m/0291hr	/film/film/language	/m/02h40lc
/m/01zlwg6	/location/hud_county_place/county	/m/0kvt9
/m/0hfml	/people/person/profession	/m/0cbd2
/m/02l96k	/music/genre/artists	/m/01vsy3q
/m/0h1cdwq	/film/film/other_crew./film/film_crew_gig/film_crew_role	/m/0ch6mp2
/m/08xwck	/award/award_nominee/award_nominations./award/award_nomination/nominated_for	/m/04p5cr
/m/01ffx4	/film/film/release_date_s./film/film_regional_release_date/film_release_region	/m/0h7x
/m/07tp2	/location/country/form_of_government	/m/06cx9
/m/03k545	/film/actor/film./film/performance/film	/m/0407yj_
/m/0jqn5	/film/film/release_date_s./film/film_regional_release_date/film_release_region	/m/0f8l9c
/m/0n_hp	/film/film/other_crew./film/film_crew_gig/film_crew_role	/m/0dxtw
/m/04ztj	/people/marriage_union_type/unions_of_this_type./people/marriage/location_of_ceremony	/m/0ply0
/m/03c7ln	/music/artist/track_contributions./music/track_contribution/role	/m/05842k
/m/0202p_	/film/actor/film./film/performance/film	/m/04v89z
/m/09nz_c	/film/actor/film./film/performance/film	/m/033qdy
/m/0fhzwl	/tv/tv_program/genre	/m/09blyk
/m/05c26ss	/film/film/release_date_s./film/film_regional_release_date/film_release_region	/m/0jgd
/m/02z3r8t	/film/film/other_crew./film/film_crew_gig/film_crew_role	/m/0ch6mp2
/m/024rgt	/film/film_distributor/films_distributed./film/film_film_distributor_relationship/film	/m/02g5q1
/m/0579tg2	/people/deceased_person/place_of_death	/m/030qb3t
/m/09blyk	/media_common/netflix_genre/titles	/m/0g68zt
/m/05qhw	/military/military_combatant/military_conflicts./military/military_combatant_group/combatants	/m/0ctw_b
/m/0cc07	/location/location/contains	/m/0dhml
/m/044mjy	/people/person/spouse_s./people/marriage/type_of_union	/m/04ztj
/m/01ffx4	/film/film/featured_film_locations	/m/03rjj
/m/02rxbmt	/award/award_nominee/award_nominations./award/award_nomination/award	/m/02681vq
/m/042z_g	/film/actor/film./film/performance/film	/m/0y_pg
/m/045j3w	/film/film/release_date_s./film/film_regional_release_date/film_release_region	/m/06qd3
/m/0bq8tmw	/film/film/release_date_s./film/film_regional_release_date/film_release_region	/m/06t2t
/m/03ffcz	/tv/tv_program/languages	/m/02h40lc
/m/0m313	/film/film/genre	/m/02l7c8
/m/06crng	/people/person/gender	/m/05zppz
/m/02dth1	/award/award_nominee/award_nominations./award/award_nomination/award_nominee	/m/01h910
/m/013q07	/film/film/executive_produced_by	/m/03c9pqt
/m/0m66w	/film/actor/film./film/performance/film	/m/03bzyn4
/m/02gyl0	/people/person/gender	/m/05zppz
/m/048wrb	/people/person/profession	/m/0cbd2
/m/01vvyc_	/award/award_nominee/award_nominations./award/award_nomination/award	/m/03t5b6
/m/0dw4g	/award/award_nominee/award_nominations./award/award_nomination/award	/m/054ks3
/m/02rrsz	/people/person/places_lived./people/place_lived/location	/m/030qb3t
/m/0154j	/location/statistical_region/gdp_real./measurement_unit/adjusted_money_value/adjustment_currency	/m/09nqf
/m/0fthdk	/award/award_nominee/award_nominations./award/award_nomination/award_nominee	/m/06t74h
/m/02nx2k	/film/film/other_crew./film/film_crew_gig/film_crew_role	/m/09zzb8
/m/02b0y3	/soccer/football_team/current_roster./soccer/football_roster_position/position	/m/03f0fp
/m/02vr3gz	/film/film/genre	/m/07s9rl0
/m/03qlv7	/music/instrument/instrumentalists	/m/07z542
/m/0k9j_	/people/person/places_lived./people/place_lived/location	/m/015zxh
/m/01txts	/music/record_label/artist	/m/01nz1q6
/m/0jtg0	/music/performance_role/regular_performances./music/group_membership/role	/m/0g33q
/m/051z6rz	/people/person/profession	/m/0n1h
/m/0h336	/user/alexander/philosophy/philosopher/interests	/m/0x0w
/m/01n7q	/location/location/contains	/m/0r172
/m/0c11mj	/people/person/nationality	/m/03rjj
/m/039wsf	/film/actor/film./film/performance/film	/m/05qm9f
/m/04ztj	/people/marriage_union_type/unions_of_this_type./people/marriage/location_of_ceremony	/m/0pbhz
/m/027jq2	/people/person/gender	/m/05zppz
/m/05hjnw	/award/award_winning_work/awards_won./award/award_honor/award_winner	/m/01q415
/m/0c8hct	/people/person/profession	/m/0np9r
/m/015lhm	/people/person/religion	/m/01lp8
/m/016jll	/people/person/profession	/m/01c72t
/m/01gxqf	/soccer/football_team/current_roster./sports/sports_team_roster/position	/m/02_j1w
/m/07hyk	/organization/organization_member/member_of./organization/organization_membership/organization	/m/02_l9
/m/03qnc6q	/film/film/other_crew./film/film_crew_gig/film_crew_role	/m/01vx2h
/m/06rgq	/music/artist/track_contributions./music/track_contribution/role	/m/03gvt
/m/02whj	/award/award_nominee/award_nominations./award/award_nomination/award	/m/01ckcd
/m/016tt2	/film/film_distributor/films_distributed./film/film_film_distributor_relationship/film	/m/02krdz
/m/0168cl	/base/schemastaging/person_extra/net_worth./measurement_unit/dated_money_value/currency	/m/09nqf
/m/09p5mwg	/film/film/other_crew./film/film_crew_gig/film_crew_role	/m/09vw2b7
/m/02qkwl	/film/film/other_crew./film/film_crew_gig/film_crew_role	/m/0ch6mp2
/m/0dwt5	/music/performance_role/track_performances./music/track_contribution/role	/m/0979zs
/m/0g9wdmc	/film/film/other_crew./film/film_crew_gig/film_crew_role	/m/09vw2b7
/m/0947l	/base/popstra/location/vacationers./base/popstra/vacation_choice/vacationer	/m/01vs_v8
/m/0d06m5	/people/person/employment_history./business/employment_tenure/company	/m/07vsl
/m/04sry	/award/award_winner/awards_won./award/award_honor/award_winner	/m/04t38b
/m/054krc	/award/award_category/winners./award/award_honor/ceremony	/m/0g5b0q5
/m/0j_tw	/film/film/production_companies	/m/016tw3
/m/06wbm8q	/film/film/release_date_s./film/film_regional_release_date/film_release_region	/m/06m_5
/m/0275_pj	/award/award_winner/awards_won./award/award_honor/award_winner	/m/02rghbp
/m/07bx6	/film/film/language	/m/02h40lc
/m/07l4z	/sports/sports_team/roster./baseball/baseball_roster_position/position	/m/028c_8
/m/06g2d1	/award/award_nominee/award_nominations./award/award_nomination/award_nominee	/m/0blbxk
/m/0m68w	/people/person/places_lived./people/place_lived/location	/m/0qpqn
/m/0bz3jx	/film/film/genre	/m/02l7c8
/m/01kt17	/people/person/profession	/m/0dxtg
/m/0147dk	/award/award_nominee/award_nominations./award/award_nomination/award	/m/05zkcn5
/m/04_1nk	/award/award_nominee/award_nominations./award/award_nomination/nominated_for	/m/027ct7c
/m/01h6pn	/time/event/locations	/m/0f8l9c
/m/07s9rl0	/media_common/netflix_genre/titles	/m/08nhfc1
/m/02gnj2	/people/person/profession	/m/0dxtg
/m/016khd	/film/actor/film./film/performance/film	/m/0dnkmq
/m/0gr4k	/award/award_category/nominees./award/award_nomination/nominated_for	/m/0kb07
/m/094tsh6	/award/award_nominee/award_nominations./award/award_nomination/nominated_for	/m/0gfsq9
/m/014mlp	/education/educational_degree/people_with_this_degree./education/education/institution	/m/02dq8f
/m/06qd3	/military/military_combatant/military_conflicts./military/military_combatant_group/combatants	/m/0ctw_b
/m/09w1n	/olympics/olympic_sport/athletes./olympics/olympic_athlete_affiliation/country	/m/0ctw_b
/m/040b5k	/film/film/release_date_s./film/film_regional_release_date/film_release_region	/m/0d05w3
/m/02y_lrp	/film/film/genre	/m/05p553
/m/07rd7	/film/director/film	/m/01s3vk
/m/01qhm_	/people/ethnicity/people	/m/028rk
/m/02bqvs	/film/film/estimated_budget./measurement_unit/dated_money_value/currency	/m/09nqf
/m/02s6sh	/music/artist/track_contributions./music/track_contribution/role	/m/05842k
/m/011yqc	/film/film/release_date_s./film/film_regional_release_date/film_release_region	/m/06qd3
/m/0d_w7	/people/person/gender	/m/05zppz
/m/06f32	/military/military_combatant/military_conflicts./military/military_combatant_group/combatants	/m/0f8l9c
/m/02pgky2	/award/award_ceremony/awards_presented./award/award_honor/honored_for	/m/02q6gfp
/m/0c5tl	/people/person/profession	/m/05z96
/m/07q0g5	/people/person/spouse_s./people/marriage/type_of_union	/m/04ztj
/m/01frpd	/business/business_operation/revenue./measurement_unit/dated_money_value/currency	/m/09nqf
/m/02y_2y	/film/actor/film./film/performance/film	/m/07j8r
/m/082brv	/music/artist/track_contributions./music/track_contribution/role	/m/0dwt5
[truncated: 25,203 more rows]
