# Supplementary material
Source: ML conference proceedings conference paper supplement (https://proceedings.neurips.cc/paper_files/paper/2021/hash/0fd600c953cde8121262e322ef09f70e-Abstract.html)
Supplement: Supplementary file 1 [file 0fd600c953cde8121262e322ef09f70e-Supplemental.zip › Supplementary_Material_Paper_8745/data/GraIL-BM_fb237_v4/train/valid.txt]

/m/04353	/film/director/film	/m/04gp58p
/m/04g865	/people/person/profession	/m/0cbd2
/m/01n7q	/location/statistical_region/gdp_nominal./measurement_unit/dated_money_value/currency	/m/09nqf
/m/027dtv3	/award/award_winner/awards_won./award/award_honor/award_winner	/m/0dyztm
/m/01vsksr	/music/group_member/membership./music/group_membership/role	/m/0l14md
/m/01p7yb	/film/actor/film./film/performance/film	/m/02q56mk
/m/04y79_n	/award/award_nominee/award_nominations./award/award_nomination/award_nominee	/m/065ydwb
/m/01t_z	/people/person/profession	/m/04s2z
/m/0184dt	/award/award_nominee/award_nominations./award/award_nomination/award	/m/0f_nbyh
/m/02_xgp2	/education/educational_degree/people_with_this_degree./education/education/institution	/m/01pcj4
/m/023r2x	/music/performance_role/track_performances./music/track_contribution/role	/m/0l15f_
/m/0192l	/music/instrument/instrumentalists	/m/0140t7
/m/02g9p4	/music/performance_role/track_performances./music/track_contribution/role	/m/02sgy
/m/0jsqk	/film/film/language	/m/02h40lc
/m/0j2jr	/soccer/football_team/current_roster./sports/sports_team_roster/position	/m/0dgrmp
/m/0p7pw	/film/film/estimated_budget./measurement_unit/dated_money_value/currency	/m/09nqf
/m/042z_g	/award/award_nominee/award_nominations./award/award_nomination/award_nominee	/m/021vwt
/m/040njc	/award/award_category/nominees./award/award_nomination/nominated_for	/m/0yzvw
/m/0kbf1	/film/film/release_date_s./film/film_regional_release_date/film_release_region	/m/0f8l9c
/m/0m313	/award/award_winning_work/awards_won./award/award_honor/award	/m/09qwmm
/m/016s0m	/music/artist/track_contributions./music/track_contribution/role	/m/05842k
/m/08sfxj	/film/film/other_crew./film/film_crew_gig/film_crew_role	/m/0ch6mp2
/m/01ptt7	/education/university/local_tuition./measurement_unit/dated_money_value/currency	/m/09nqf
/m/05pzdk	/award/award_nominee/award_nominations./award/award_nomination/award_nominee	/m/06msq2
/m/0l14qv	/music/performance_role/track_performances./music/track_contribution/role	/m/01rhl
/m/02lf1j	/people/person/places_lived./people/place_lived/location	/m/0d6lp
/m/05cqhl	/award/award_winner/awards_won./award/award_honor/award_winner	/m/078jt5
/m/07qg8v	/film/film/genre	/m/04t36
/m/055c8	/award/award_nominee/award_nominations./award/award_nomination/award	/m/0bs0bh
/m/04sx9_	/award/award_nominee/award_nominations./award/award_nomination/award_nominee	/m/03vgp7
/m/03bnd9	/business/business_operation/revenue./measurement_unit/dated_money_value/currency	/m/09nqf
/m/087_xx	/soccer/football_team/current_roster./sports/sports_team_roster/position	/m/02_j1w
/m/06qgvf	/people/person/places_lived./people/place_lived/location	/m/0rrwt
/m/0l15bq	/music/performance_role/track_performances./music/track_contribution/role	/m/0dwt5
/m/01kwsg	/award/award_winner/awards_won./award/award_honor/award_winner	/m/01713c
/m/0pd64	/film/film/release_date_s./film/film_regional_release_date/film_release_region	/m/0d0vqn
/m/033f8n	/film/film/genre	/m/0556j8
/m/029sk	/medicine/disease/notable_people_with_this_condition	/m/01rh0w
/m/04q5zw	/award/award_nominee/award_nominations./award/award_nomination/nominated_for	/m/02y_lrp
/m/04v68c	/sports/pro_athlete/teams./sports/sports_team_roster/team	/m/02029f
/m/07s9rl0	/media_common/netflix_genre/titles	/m/04jm_hq
/m/0bs0bh	/award/award_category/winners./award/award_honor/award_winner	/m/02_p8v
/m/02bgmr	/people/person/nationality	/m/0jgd
/m/028tv0	/music/performance_role/regular_performances./music/group_membership/role	/m/01qbl
/m/04dn09n	/award/award_category/nominees./award/award_nomination/nominated_for	/m/08nvyr
/m/05567m	/film/film/estimated_budget./measurement_unit/dated_money_value/currency	/m/09nqf
/m/01pw2f1	/people/person/spouse_s./people/marriage/type_of_union	/m/04ztj
/m/02j9z	/base/locations/continents/countries_within	/m/0154j
/m/02qyxs5	/award/award_category/nominees./award/award_nomination/nominated_for	/m/04lqvly
/m/07l2m	/sports/sports_team/roster./american_football/football_historical_roster_position/position_s	/m/0b13yt
/m/080dfr7	/film/film/language	/m/02h40lc
/m/0kbg6	/people/person/gender	/m/05zppz
/m/0fkvn	/government/government_office_category/officeholders./government/government_position_held/jurisdiction_of_office	/m/07ww5
/m/0b90_r	/base/popstra/location/vacationers./base/popstra/vacation_choice/vacationer	/m/036hf4
/m/0n5gq	/location/us_county/county_seat	/m/0hptm
/m/039wsf	/award/award_nominee/award_nominations./award/award_nomination/nominated_for	/m/05qm9f
/m/065ydwb	/award/award_nominee/award_nominations./award/award_nomination/award	/m/0c422z4
/m/02j9z	/location/location/contains	/m/06c1y
/m/0171lb	/people/person/profession	/m/0dxtg
/m/0chghy	/military/military_combatant/military_conflicts./military/military_combatant_group/combatants	/m/015fr
/m/02qw1zx	/sports/sports_league_draft/picks./sports/sports_league_draft_pick/school	/m/01jsk6
/m/0p_pd	/award/award_nominee/award_nominations./award/award_nomination/nominated_for	/m/043t8t
/m/084302	/film/film/language	/m/02h40lc
/m/0dgrmp	/sports/sports_position/players./sports/sports_team_roster/team	/m/080_y
/m/0336mc	/film/actor/film./film/performance/film	/m/01vw8k
/m/01h910	/tv/tv_producer/programs_produced./tv/tv_producer_term/program	/m/01bv8b
/m/025vry	/people/person/gender	/m/05zppz
/m/02q7fl9	/film/film/other_crew./film/film_crew_gig/film_crew_role	/m/09zzb8
/m/0bfvw2	/award/award_category/nominees./award/award_nomination/nominated_for	/m/064r97z
/m/07swvb	/people/person/languages	/m/02h40lc
/m/040b5k	/film/film/release_date_s./film/film_regional_release_date/film_release_region	/m/05b4w
/m/029v40	/film/film/estimated_budget./measurement_unit/dated_money_value/currency	/m/09nqf
/m/0c40vxk	/film/film/release_date_s./film/film_regional_release_date/film_release_region	/m/05qhw
/m/01xg_w	/film/actor/film./film/performance/film	/m/02y_lrp
/m/01ycbq	/people/person/profession	/m/0np9r
/m/04cl1	/award/award_nominee/award_nominations./award/award_nomination/award_nominee	/m/03wh8kl
/m/0m9v7	/people/person/spouse_s./people/marriage/type_of_union	/m/04ztj
/m/0bynt	/olympics/olympic_sport/athletes./olympics/olympic_athlete_affiliation/country	/m/05b4w
/m/03rwz3	/base/schemastaging/organization_extra/phone_number./base/schemastaging/phone_sandbox/service_language	/m/02h40lc
/m/01817f	/award/award_nominee/award_nominations./award/award_nomination/award	/m/054ks3
/m/05zr0xl	/award/award_winning_work/awards_won./award/award_honor/award_winner	/m/0crx5w
/m/0154j	/olympics/olympic_participating_country/athletes./olympics/olympic_athlete_affiliation/olympics	/m/0lbbj
/m/05zjtn4	/education/university/domestic_tuition./measurement_unit/dated_money_value/currency	/m/09nqf
/m/0c3kw	/award/award_nominee/award_nominations./award/award_nomination/award	/m/01bb1c
/m/0401sg	/film/film/release_date_s./film/film_regional_release_date/film_release_region	/m/06f32
/m/0140t7	/music/artist/track_contributions./music/track_contribution/role	/m/01vdm0
/m/02lv2v	/organization/non_profit_organization/registered_with./organization/non_profit_registration/registering_agency	/m/03z19
/m/01vsl3_	/people/person/profession	/m/016z4k
/m/015lhm	/people/person/gender	/m/05zppz
/m/01mkn_d	/people/person/gender	/m/05zppz
/m/02_j1w	/sports/sports_position/players./sports/sports_team_roster/team	/m/06zdt7
/m/0170th	/film/film/other_crew./film/film_crew_gig/film_crew_role	/m/0dxtw
/m/017gl1	/film/film/release_date_s./film/film_regional_release_date/film_release_region	/m/0154j
/m/03kq98	/tv/tv_program/regular_cast./tv/regular_tv_appearance/actor	/m/01gvr1
/m/0713r	/baseball/baseball_team/team_stats./baseball/baseball_team_stats/season	/m/027pwzc
/m/02z6l5f	/award/award_nominee/award_nominations./award/award_nomination/nominated_for	/m/016mhd
/m/014v1q	/people/person/profession	/m/0cbd2
/m/0gkr9q	/award/award_category/nominees./award/award_nomination/nominated_for	/m/0d7vtk
/m/0h3mh3q	/tv/tv_program/regular_cast./tv/regular_tv_appearance/actor	/m/01y9xg
/m/01p7yb	/award/award_nominee/award_nominations./award/award_nomination/award	/m/03qgjwc
/m/06jtd	/location/location/adjoin_s./location/adjoining_relationship/adjoins	/m/09ksp
/m/01n1pp	/education/educational_institution/students_graduates./education/education/student	/m/016hvl
/m/01nty	/location/statistical_region/gdp_nominal./measurement_unit/dated_money_value/currency	/m/09nqf
/m/073749	/award/award_nominee/award_nominations./award/award_nomination/award_nominee	/m/07y8l9
/m/064177	/award/award_nominee/award_nominations./award/award_nomination/award	/m/0gr4k
/m/05ldxl	/film/film/other_crew./film/film_crew_gig/film_crew_role	/m/09zzb8
/m/05z_kps	/film/film/production_companies	/m/0283xx2
/m/045j3w	/film/film/runtime./film/film_cut/film_release_region	/m/06qd3
/m/05vsxz	/award/award_nominee/award_nominations./award/award_nomination/award_nominee	/m/0blbxk
/m/0g54xkt	/film/film/genre	/m/0hn10
/m/01n8gr	/people/person/profession	/m/01c72t
/m/015_30	/award/award_nominee/award_nominations./award/award_nomination/award	/m/054krc
/m/06t74h	/award/award_winner/awards_won./award/award_honor/award_winner	/m/06g2d1
/m/044mjy	/award/award_nominee/award_nominations./award/award_nomination/award_nominee	/m/07f3xb
/m/040rjq	/influence/influence_node/influenced_by	/m/07h07
/m/0gwgn1k	/film/film/release_date_s./film/film_regional_release_date/film_release_region	/m/04gzd
/m/02bvt	/award/award_winner/awards_won./award/award_honor/award_winner	/m/0d4fqn
/m/0l14md	/music/performance_role/regular_performances./music/group_membership/role	/m/01hww_
/m/0fj52s	/food/food/nutrients./food/nutrition_fact/nutrient	/m/01n78x
/m/0170xl	/film/film/genre	/m/07s9rl0
/m/0498y	/location/statistical_region/gdp_nominal./measurement_unit/dated_money_value/currency	/m/09nqf
/m/03_44z	/soccer/football_team/current_roster./soccer/football_roster_position/position	/m/0dgrmp
/m/041rx	/people/ethnicity/people	/m/03fg0r
/m/0hmr4	/award/award_winning_work/awards_won./award/award_honor/award	/m/02qyntr
/m/0b85mm	/film/film/country	/m/03rjj
/m/01cwhp	/award/award_nominee/award_nominations./award/award_nomination/award	/m/054ks3
/m/02wwmhc	/film/film/genre	/m/05p553
/m/09_99w	/award/award_nominee/award_nominations./award/award_nomination/award_nominee	/m/04wvhz
/m/065jlv	/award/award_nominee/award_nominations./award/award_nomination/award_nominee	/m/0h0yt
/m/0265vt	/award/award_category/winners./award/award_honor/award_winner	/m/0fpzt5
/m/01jft4	/film/film/executive_produced_by	/m/04l3_z
/m/05pdh86	/film/film/other_crew./film/film_crew_gig/film_crew_role	/m/089g0h
/m/01jgpsh	/award/award_nominee/award_nominations./award/award_nomination/award	/m/09qvf4
/m/048scx	/film/film/other_crew./film/film_crew_gig/film_crew_role	/m/04pyp5
/m/0h63q6t	/tv/tv_program/genre	/m/07s9rl0
/m/0l15bq	/music/performance_role/track_performances./music/track_contribution/role	/m/0l14qv
/m/0hsmh	/award/award_nominee/award_nominations./award/award_nomination/nominated_for	/m/0cq7tx
/m/05r3qc	/film/film/estimated_budget./measurement_unit/dated_money_value/currency	/m/09nqf
/m/02704ff	/film/film/other_crew./film/film_crew_gig/film_crew_role	/m/02r96rf
/m/04sx9_	/film/actor/film./film/performance/film	/m/05567m
/m/07dfk	/travel/travel_destination/climate./travel/travel_destination_monthly_climate/month	/m/02xx5
/m/0l14md	/music/performance_role/regular_performances./music/group_membership/role	/m/01xqw
/m/06qgvf	/people/person/place_of_birth	/m/0rrwt
/m/0bzjvm	/award/award_ceremony/awards_presented./award/award_honor/award_winner	/m/0kft
/m/02qgqt	/people/person/gender	/m/05zppz
/m/01_k7f	/education/university/domestic_tuition./measurement_unit/dated_money_value/currency	/m/09nqf
/m/0nhr5	/location/statistical_region/rent50_2./measurement_unit/dated_money_value/currency	/m/09nqf
/m/016jfw	/people/person/profession	/m/0nbcg
/m/04gzd	/location/country/capital	/m/07_kq
/m/0c3ns	/award/award_nominee/award_nominations./award/award_nomination/nominated_for	/m/0llcx
/m/0fd3y	/music/genre/parent_genre	/m/0190_q
/m/051zy_b	/award/award_winning_work/awards_won./award/award_honor/award_winner	/m/019pm_
/m/01ww_vs	/influence/influence_node/influenced_by	/m/048xh
/m/02wtp6	/film/film/release_date_s./film/film_regional_release_date/film_release_region	/m/0h7x
/m/0cv2m	/base/aareas/schema/administrative_area/administrative_parent	/m/03rk0
/m/0bqxw	/education/university/fraternities_and_sororities	/m/0325pb
/m/0b13g7	/award/award_nominee/award_nominations./award/award_nomination/nominated_for	/m/05vxdh
/m/011_6p	/music/performance_role/track_performances./music/track_contribution/role	/m/01vdm0
/m/0cq806	/award/award_winning_work/awards_won./award/award_honor/award	/m/0gr4k
/m/08l0x2	/tv/tv_program/regular_cast./tv/regular_tv_appearance/actor	/m/01gvr1
/m/0m3gy	/film/film/release_date_s./film/film_regional_release_date/film_release_region	/m/03gj2
/m/02qlg7s	/award/award_nominee/award_nominations./award/award_nomination/award_nominee	/m/01cwhp
/m/0dgrmp	/sports/sports_position/players./sports/sports_team_roster/team	/m/03xzxb
/m/011yqc	/film/film/language	/m/02h40lc
/m/030155	/people/person/profession	/m/016z4k
/m/0n04r	/film/film/release_date_s./film/film_regional_release_date/film_regional_debut_venue	/m/07zmj
/m/05fgt1	/film/film/other_crew./film/film_crew_gig/crewmember	/m/03m49ly
/m/041rx	/people/ethnicity/people	/m/0h25
/m/0167v	/location/statistical_region/gdp_nominal_per_capita./measurement_unit/dated_money_value/currency	/m/09nqf
/m/0qjfl	/award/hall_of_fame/inductees./award/hall_of_fame_induction/inductee	/m/03fvqg
/m/018n6m	/people/person/profession	/m/0n1h
/m/014v6f	/award/award_nominee/award_nominations./award/award_nomination/award	/m/09sdmz
/m/08rr3p	/film/film/genre	/m/05p553
/m/0h63gl9	/film/film/release_date_s./film/film_regional_release_date/film_release_region	/m/0154j
/m/0frq6	/food/food/nutrients./food/nutrition_fact/nutrient	/m/0f4hc
/m/0gffmn8	/film/film/release_date_s./film/film_regional_release_date/film_release_region	/m/0b90_r
/m/0g68zt	/award/award_winning_work/awards_won./award/award_honor/award_winner	/m/01pcql
/m/03_c8p	/organization/organization/headquarters./location/mailing_address/citytown	/m/024bqj
/m/0prjs	/people/person/places_lived./people/place_lived/location	/m/01l63
/m/0233bn	/film/film/release_date_s./film/film_regional_release_date/film_release_region	/m/03rjj
/m/09nz_c	/people/person/spouse_s./people/marriage/type_of_union	/m/04ztj
/m/07s9rl0	/media_common/netflix_genre/titles	/m/011yqc
/m/01w1kyf	/award/award_nominee/award_nominations./award/award_nomination/award	/m/054ky1
/m/02qkt	/location/location/contains	/m/016zwt
/m/047fjjr	/film/film/release_date_s./film/film_regional_release_date/film_release_region	/m/047yc
/m/018w8	/olympics/olympic_sport/athletes./olympics/olympic_athlete_affiliation/country	/m/0jgd
/m/0bq6ntw	/film/film/film_format	/m/017fx5
/m/0jqzt	/film/film/release_date_s./film/film_regional_release_date/film_release_region	/m/0h7x
/m/02__x	/baseball/baseball_team/team_stats./baseball/baseball_team_stats/season	/m/026fmqm
/m/02p8v8	/film/actor/film./film/performance/film	/m/065z3_x
/m/0xnvg	/people/ethnicity/people	/m/046lt
/m/014mlp	/education/educational_degree/people_with_this_degree./education/education/institution	/m/02klny
/m/09n5b9	/government/government_office_category/officeholders./government/government_position_held/jurisdiction_of_office	/m/01n7q
/m/02g9p4	/music/performance_role/regular_performances./music/group_membership/role	/m/0jtg0
/m/04n7jdv	/music/genre/artists	/m/03sww
/m/05qtj	/location/location/contains	/m/02cw8s
/m/0nbjq	/olympics/olympic_games/sports	/m/0bynt
/m/01xdf5	/influence/influence_node/influenced_by	/m/013qvn
/m/0136g9	/award/award_nominee/award_nominations./award/award_nomination/nominated_for	/m/0cc5qkt
/m/0n2bh	/tv/tv_program/genre	/m/07qht4
/m/0pd64	/film/film/film_format	/m/0cj16
/m/02mjs7	/education/educational_degree/people_with_this_degree./education/education/institution	/m/01dbns
/m/01y3v	/american_football/football_team/current_roster./sports/sports_team_roster/position	/m/04nfpk
/m/0pc62	/film/film/music	/m/0150t6
/m/0661ql3	/film/film/release_date_s./film/film_regional_release_date/film_release_region	/m/05b4w
/m/03_hd	/people/person/profession	/m/0frz0
/m/02sgy	/music/performance_role/track_performances./music/track_contribution/role	/m/07kc_
/m/06r2_	/film/film/release_date_s./film/film_regional_release_date/film_release_region	/m/05b4w
/m/0bmssv	/film/film/language	/m/02h40lc
/m/0d05w3	/location/statistical_region/gni_per_capita_in_ppp_dollars./measurement_unit/dated_money_value/currency	/m/09nqf
/m/05fgt1	/film/film/genre	/m/07s9rl0
/m/01rr_d	/education/educational_degree/people_with_this_degree./education/education/institution	/m/014zws
/m/0gzlb9	/film/film/other_crew./film/film_crew_gig/film_crew_role	/m/0dxtw
/m/09f6b	/olympics/olympic_sport/athletes./olympics/olympic_athlete_affiliation/country	/m/04g5k
/m/02xgdv	/people/person/nationality	/m/03rk0
/m/01v0fn1	/award/award_nominee/award_nominations./award/award_nomination/award_nominee	/m/05mt6w
/m/02cj_f	/people/person/profession	/m/016z4k
/m/093h7p	/film/film_distributor/films_distributed./film/film_film_distributor_relationship/film	/m/01vksx
/m/0h63q6t	/film/film/other_crew./film/film_crew_gig/film_crew_role	/m/02r96rf
/m/01w9wwg	/people/person/gender	/m/05zppz
/m/02t0n9	/people/deceased_person/place_of_burial	/m/018mmj
/m/03qd_	/award/award_winner/awards_won./award/award_honor/award_winner	/m/021bk
/m/0d0vqn	/location/statistical_region/gdp_nominal./measurement_unit/dated_money_value/currency	/m/09nqf
/m/014mlp	/education/educational_degree/people_with_this_degree./education/education/student	/m/0686zv
/m/0h0wd9	/film/film/film_festivals	/m/059_y8d
/m/023kzp	/award/award_nominee/award_nominations./award/award_nomination/award_nominee	/m/019pm_
/m/0bvn25	/film/film/genre	/m/05p553
/m/01z27	/olympics/olympic_sport/athletes./olympics/olympic_athlete_affiliation/country	/m/06c1y
/m/026b7bz	/award/award_nominee/award_nominations./award/award_nomination/nominated_for	/m/0phrl
/m/03jg5t	/award/award_nominee/award_nominations./award/award_nomination/award	/m/0bp_b2
/m/06zpgb2	/soccer/football_team/current_roster./soccer/football_roster_position/position	/m/02_j1w
/m/02dlh2	/music/performance_role/track_performances./music/track_contribution/role	/m/0319l
/m/0gs96	/award/award_category/nominees./award/award_nomination/nominated_for	/m/0ckrnn
/m/0fpj4lx	/people/person/profession	/m/016z4k
/m/0jsqk	/film/film/story_by	/m/0l99s
/m/027xx3	/education/educational_institution/school_type	/m/04399
/m/0m3gy	/film/film/release_date_s./film/film_regional_release_date/film_release_region	/m/03rjj
/m/02wk_43	/people/person/profession	/m/0dxtg
/m/0135xb	/people/person/profession	/m/0nbcg
/m/02_j1w	/sports/sports_position/players./sports/sports_team_roster/team	/m/03d0d7
/m/0prjs	/award/award_nominee/award_nominations./award/award_nomination/nominated_for	/m/01kff7
/m/0l76z	/tv/tv_program/genre	/m/0vgkd
/m/04ddm4	/film/film/release_date_s./film/film_regional_release_date/film_release_region	/m/082fr
/m/09qvf4	/award/award_category/winners./award/award_honor/award_winner	/m/03rwng
/m/0mkg	/music/performance_role/track_performances./music/track_contribution/role	/m/04q7r
/m/03kg2v	/film/film/genre	/m/02l7c8
/m/01vvycq	/people/person/profession	/m/0dxtg
/m/01vw26l	/award/award_winner/awards_won./award/award_honor/award_winner	/m/0gy6z9
/m/01s7j5	/organization/organization/headquarters./location/mailing_address/citytown	/m/0psxp
/m/01x4wq	/soccer/football_team/current_roster./soccer/football_roster_position/position	/m/0dgrmp
/m/07nxvj	/award/award_winning_work/awards_won./award/award_honor/award_winner	/m/0169dl
/m/02__x	/baseball/baseball_team/team_stats./baseball/baseball_team_stats/season	/m/0285r5d
/m/0ddd9	/award/award_category/winners./award/award_honor/award_winner	/m/0m77m
/m/08cn4_	/people/person/places_lived./people/place_lived/location	/m/030qb3t
/m/0x67	/people/ethnicity/people	/m/01j7z7
/m/02qlg7s	/award/award_winner/awards_won./award/award_honor/award_winner	/m/01cwhp
/m/04cbbz	/film/film/language	/m/06b_j
/m/01n6r0	/education/educational_institution/students_graduates./education/education/student	/m/01qbjg
/m/014mlp	/education/educational_degree/people_with_this_degree./education/education/institution	/m/07tgn
/m/021yw7	/people/person/profession	/m/01c72t
/m/07fvf1	/award/award_nominee/award_nominations./award/award_nomination/nominated_for	/m/01bv8b
/m/05zwrg0	/film/film/film_festivals	/m/0bmj62v
/m/030_1m	/film/film_distributor/films_distributed./film/film_film_distributor_relationship/film	/m/08rr3p
/m/040njc	/award/award_category/nominees./award/award_nomination/nominated_for	/m/014l6_
/m/03rgvr	/people/person/gender	/m/05zppz
/m/0gxkm	/soccer/football_team/current_roster./sports/sports_team_roster/position	/m/0dgrmp
/m/01h1b	/award/award_nominee/award_nominations./award/award_nomination/award_nominee	/m/05pzdk
/m/0l14md	/music/performance_role/regular_performances./music/group_membership/role	/m/0d8lm
/m/08s6mr	/film/film/other_crew./film/film_crew_gig/film_crew_role	/m/089g0h
/m/09sdmz	/award/award_category/winners./award/award_honor/award_winner	/m/0b_dy
/m/041rx	/people/ethnicity/people	/m/03swmf
/m/013ksx	/location/location/time_zones	/m/02hcv8
/m/0p2rj	/location/location/contains	/m/0ftvg
/m/017_pb	/influence/influence_node/influenced_by	/m/0l99s
/m/02633g	/people/person/gender	/m/05zppz
/m/026yqrr	/people/person/profession	/m/0nbcg
/m/0713r	/sports/sports_team/roster./baseball/baseball_roster_position/position	/m/02dwpf
/m/023sng	/people/person/place_of_birth	/m/0hj6h
/m/0221g_	/base/schemastaging/organization_extra/phone_number./base/schemastaging/phone_sandbox/service_location	/m/02j71
/m/0cp9f9	/award/award_winner/awards_won./award/award_honor/award_winner	/m/02f9wb
/m/019pkm	/people/person/gender	/m/05zppz
/m/06p0s1	/people/person/gender	/m/05zppz
/m/01dhmw	/award/award_nominee/award_nominations./award/award_nomination/award	/m/040vk98
/m/01ycbq	/award/award_winner/awards_won./award/award_honor/award_winner	/m/0k269
/m/0hvvf	/film/film/language	/m/02h40lc
/m/02qyntr	/award/award_category/nominees./award/award_nomination/nominated_for	/m/011yd2
/m/02dlh2	/music/performance_role/track_performances./music/track_contribution/role	/m/0dwt5
/m/0h63gl9	/film/film/release_date_s./film/film_regional_release_date/film_release_region	/m/03gj2
/m/01zg98	/award/award_nominee/award_nominations./award/award_nomination/award_nominee	/m/0b_dy
/m/065ydwb	/award/award_nominee/award_nominations./award/award_nomination/award_nominee	/m/06w2yp9
/m/03jvmp	/award/award_winner/awards_won./award/award_honor/award_winner	/m/0283xx2
/m/047myg9	/film/film/other_crew./film/film_crew_gig/film_crew_role	/m/0dxtw
/m/04cw0j	/award/award_nominee/award_nominations./award/award_nomination/award_nominee	/m/04135
/m/050yyb	/award/award_ceremony/awards_presented./award/award_honor/honored_for	/m/02wgk1
/m/0pm85	/music/genre/parent_genre	/m/03p7rp
/m/02q6gfp	/film/film/other_crew./film/film_crew_gig/film_crew_role	/m/0dxtw
/m/06gn7r	/people/person/spouse_s./people/marriage/type_of_union	/m/04ztj
/m/01vvycq	/people/person/gender	/m/05zppz
/m/01gstn	/government/legislative_session/members./government/government_position_held/legislative_sessions	/m/01gsrl
/m/0jv5x	/soccer/football_team/current_roster./sports/sports_team_roster/position	/m/0dgrmp
/m/02p65p	/people/person/gender	/m/05zppz
/m/02b0zd	/soccer/football_team/current_roster./soccer/football_roster_position/position	/m/02_j1w
/m/0d05w3	/location/location/contains	/m/014vm4
/m/04ztj	/people/marriage_union_type/unions_of_this_type./people/marriage/location_of_ceremony	/m/04rrx
/m/02n4kr	/media_common/netflix_genre/titles	/m/05znxx
/m/02tgz4	/film/film/other_crew./film/film_crew_gig/film_crew_role	/m/089fss
/m/0l14md	/music/performance_role/regular_performances./music/group_membership/role	/m/0l15bq
/m/04ztj	/people/marriage_union_type/unions_of_this_type./people/marriage/location_of_ceremony	/m/0ck6r
/m/0hx4y	/film/film/language	/m/02h40lc
/m/0h63q6t	/tv/tv_program/languages	/m/02h40lc
/m/05q8pss	/award/award_category/winners./award/award_honor/award_winner	/m/02fgpf
/m/0dtzkt	/film/film/music	/m/0lccn
/m/0cwrr	/award/award_winning_work/awards_won./award/award_honor/award_winner	/m/015wfg
/m/01p7yb	/people/person/spouse_s./people/marriage/type_of_union	/m/04ztj
/m/06cgy	/film/director/film	/m/07nxvj
/m/064vjs	/olympics/olympic_sport/athletes./olympics/olympic_athlete_affiliation/country	/m/0jgx
/m/01wg25j	/people/person/profession	/m/0nbcg
/m/030hcs	/award/award_winner/awards_won./award/award_honor/award_winner	/m/0169dl
/m/015vql	/people/person/spouse_s./people/marriage/type_of_union	/m/04ztj
/m/04cl1	/tv/tv_producer/programs_produced./tv/tv_producer_term/program	/m/0330r
/m/0f2v0	/base/popstra/location/vacationers./base/popstra/vacation_choice/vacationer	/m/01pgzn_
/m/05sy2k_	/tv/tv_program/genre	/m/07s9rl0
/m/0dwt5	/music/performance_role/track_performances./music/track_contribution/role	/m/01679d
/m/0154qm	/film/actor/film./film/performance/film	/m/027m5wv
/m/01xlqd	/film/film/release_date_s./film/film_regional_release_date/film_release_region	/m/03rjj
/m/02_xgp2	/education/educational_degree/people_with_this_degree./education/education/student	/m/08_hns
/m/05218gr	/award/award_nominee/award_nominations./award/award_nomination/award_nominee	/m/051ysmf
/m/04v89z	/film/film/genre	/m/07s9rl0
/m/0265v21	/award/award_winner/awards_won./award/award_honor/award_winner	/m/02rghbp
/m/016vg8	/award/award_nominee/award_nominations./award/award_nomination/award_nominee	/m/02p65p
/m/013zdg	/education/educational_degree/people_with_this_degree./education/education/institution	/m/09b_0m
/m/0gvx_	/award/award_category/winners./award/award_honor/ceremony	/m/0dth6b
/m/02hp70	/education/educational_institution/students_graduates./education/education/major_field_of_study	/m/0g26h
/m/011yxg	/award/award_winning_work/awards_won./award/award_honor/award	/m/0gs96
/m/040njc	/award/award_category/nominees./award/award_nomination/nominated_for	/m/0dmn0x
/m/0h1x5f	/film/film/language	/m/02h40lc
/m/014mlp	/education/educational_degree/people_with_this_degree./education/education/student	/m/03f1r6t
/m/01tjsl	/location/location/adjoin_s./location/adjoining_relationship/adjoins	/m/01tjt2
/m/01tspc6	/award/award_nominee/award_nominations./award/award_nomination/award_nominee	/m/03t0k1
/m/07g9f	/award/award_winning_work/awards_won./award/award_honor/award_winner	/m/01gp_x
/m/045zr	/award/award_nominee/award_nominations./award/award_nomination/award_nominee	/m/02qtywd
/m/012cph	/people/person/spouse_s./people/marriage/location_of_ceremony	/m/0d6lp
/m/05sy_5	/film/film/film_festivals	/m/0bmj62v
/m/028tv0	/music/performance_role/regular_performances./music/group_membership/group	/m/0134pk
/m/0gs96	/award/award_category/nominees./award/award_nomination/nominated_for	/m/017jd9
/m/0gwgn1k	/film/film/release_date_s./film/film_regional_release_date/film_release_region	/m/03rjj
/m/09qvf4	/award/award_category/winners./award/award_honor/award_winner	/m/031sg0
/m/09ntbc	/soccer/football_player/current_team./sports/sports_team_roster/team	/m/01x4wq
/m/0gqz2	/award/award_category/winners./award/award_honor/ceremony	/m/0bzm__
/m/01v_pj6	/music/artist/track_contributions./music/track_contribution/role	/m/01vdm0
/m/0311wg	/award/award_nominee/award_nominations./award/award_nomination/award_nominee	/m/038bht
/m/03m3vr6	/people/cause_of_death/people	/m/0137hn
/m/026p_bs	/film/film/language	/m/02h40lc
/m/02z3zp	/people/person/profession	/m/0cbd2
/m/03rhqg	/music/record_label/artist	/m/01fchy
/m/03zg2x	/award/award_winner/awards_won./award/award_honor/award_winner	/m/02qgqt
/m/032wdd	/award/award_winner/awards_won./award/award_honor/award_winner	/m/06mmb
/m/03jg5t	/sports/pro_athlete/teams./sports/sports_team_roster/team	/m/02b168
/m/05b4w	/military/military_combatant/military_conflicts./military/military_combatant_group/combatants	/m/05qhw
/m/01c9d1	/award/award_category/winners./award/award_honor/ceremony	/m/01mhwk
/m/08mg_b	/film/film/genre	/m/07s9rl0
/m/07l4z	/baseball/baseball_team/team_stats./baseball/baseball_team_stats/season	/m/0285r5d
/m/0bpm4yw	/film/film/film_format	/m/017fx5
/m/077rj	/people/person/gender	/m/05zppz
/m/024dw0	/people/person/gender	/m/05zppz
/m/07hwkr	/people/ethnicity/languages_spoken	/m/06b_j
/m/05zvj3m	/award/award_category/nominees./award/award_nomination/nominated_for	/m/013q07
/m/01pcq3	/people/person/places_lived./people/place_lived/location	/m/030qb3t
/m/016tw3	/film/film_distributor/films_distributed./film/film_film_distributor_relationship/film	/m/035xwd
/m/0cqhk0	/award/award_category/nominees./award/award_nomination/nominated_for	/m/0431v3
/m/014mlp	/education/educational_degree/people_with_this_degree./education/education/major_field_of_study	/m/088tb
/m/019fnv	/people/person/spouse_s./people/marriage/type_of_union	/m/04ztj
/m/01j6t0	/medicine/symptom/symptom_of	/m/074m2
/m/07bwr	/film/film/genre	/m/0556j8
/m/03f3yfj	/people/person/profession	/m/0nbcg
/m/0dl5d	/music/genre/artists	/m/01vrwfv
/m/01s695	/award/award_ceremony/awards_presented./award/award_honor/award_winner	/m/04rcr
/m/02qkwl	/film/film/other_crew./film/film_crew_gig/film_crew_role	/m/09vw2b7
/m/01vs4f3	/people/person/profession	/m/016z4k
/m/03l3ln	/people/person/gender	/m/05zppz
/m/0c3351	/media_common/netflix_genre/titles	/m/02q0v8n
/m/0f8l9c	/location/location/contains	/m/09nyf
/m/02_j1w	/sports/sports_position/players./sports/sports_team_roster/team	/m/09pgj2
/m/02hkv5	/people/person/nationality	/m/03rk0
/m/0fhpv4	/award/award_category/nominees./award/award_nomination/nominated_for	/m/04b2qn
/m/01qscs	/film/actor/film./film/performance/film	/m/02d478
/m/05h43ls	/film/film/other_crew./film/film_crew_gig/film_crew_role	/m/0215hd
/m/070j61	/award/award_nominee/award_nominations./award/award_nomination/award_nominee	/m/024rgt
/m/0dgrmp	/sports/sports_position/players./sports/sports_team_roster/team	/m/01x4wq
/m/07jrjb	/people/person/places_lived./people/place_lived/location	/m/05fjf
/m/01679d	/music/performance_role/regular_performances./music/group_membership/role	/m/0xzly
/m/0gkvb7	/award/award_category/winners./award/award_honor/award_winner	/m/02l3_5
/m/0gtvrv3	/film/film/other_crew./film/film_crew_gig/film_crew_role	/m/01pvkk
/m/0cttx	/soccer/football_team/current_roster./sports/sports_team_roster/position	/m/02_j1w
/m/01j7z7	/people/person/profession	/m/0dxtg
/m/0154qm	/award/award_nominee/award_nominations./award/award_nomination/award_nominee	/m/02qgyv
/m/01sbv9	/film/film/genre	/m/01zhp
/m/01738w	/film/film/other_crew./film/film_crew_gig/film_crew_role	/m/0dxtw
/m/0778_3	/education/university/domestic_tuition./measurement_unit/dated_money_value/currency	/m/0ptk_
/m/0745k7	/people/person/spouse_s./people/marriage/type_of_union	/m/04ztj
/m/0cz_ym	/film/film/produced_by	/m/04wvhz
/m/03rk0	/sports/sports_team_location/teams	/m/024nj1
/m/024dw0	/people/person/spouse_s./people/marriage/type_of_union	/m/04ztj
/m/043g7l	/music/record_label/artist	/m/01lf293
/m/071pf2	/sports/pro_athlete/teams./sports/sports_team_roster/team	/m/01rl_3
/m/054ks3	/award/award_category/winners./award/award_honor/award_winner	/m/02fgp0
/m/0l2xl	/location/location/contains	/m/0r679
/m/01hwkn	/military/military_conflict/combatants./military/military_combatant_group/combatants	/m/014tss
/m/07ylj	/olympics/olympic_participating_country/athletes./olympics/olympic_athlete_affiliation/olympics	/m/0lbd9
/m/05qkp	/location/statistical_region/gdp_nominal_per_capita./measurement_unit/dated_money_value/currency	/m/09nqf
/m/02h30z	/organization/organization/headquarters./location/mailing_address/citytown	/m/0rd5k
/m/03phgz	/award/ranked_item/appears_in_ranked_lists./award/ranking/list	/m/01pd60
/m/01jzyx	/education/educational_institution/students_graduates./education/education/student	/m/03swmf
/m/0mr_8	/location/statistical_region/rent50_2./measurement_unit/dated_money_value/currency	/m/09nqf
/m/01y49	/sports/sports_team/roster./american_football/football_roster_position/position	/m/04nfpk
/m/02h22	/film/film/other_crew./film/film_crew_gig/film_crew_role	/m/0ch6mp2
/m/0bynt	/olympics/olympic_sport/athletes./olympics/olympic_athlete_affiliation/country	/m/0d05w3
/m/06x68	/sports/sports_team/roster./baseball/baseball_roster_position/position	/m/028c_8
/m/0c8tkt	/film/film/language	/m/02h40lc
/m/06mr6	/base/schemastaging/person_extra/net_worth./measurement_unit/dated_money_value/currency	/m/09nqf
/m/0dckvs	/film/film/release_date_s./film/film_regional_release_date/film_release_region	/m/0jgd
/m/0bjkk9	/american_football/football_team/current_roster./sports/sports_team_roster/position	/m/04nfpk
/m/01kwsg	/award/award_nominee/award_nominations./award/award_nomination/award_nominee	/m/031k24
/m/01vw917	/people/person/gender	/m/05zppz
/m/054ks3	/award/award_category/nominees./award/award_nomination/nominated_for	/m/06rhz7
/m/0b_dy	/award/award_winner/awards_won./award/award_honor/award_winner	/m/01zg98
/m/019pkm	/people/person/profession	/m/012t_z
/m/01vdm0	/music/performance_role/track_performances./music/track_contribution/role	/m/0192l
/m/01w1kyf	/people/person/profession	/m/0dxtg
/m/0dnkmq	/film/film/prequel	/m/024mpp
/m/0jtg0	/music/instrument/instrumentalists	/m/019389
/m/03gvpk	/people/person/profession	/m/0cbd2
/m/0f1_p	/base/biblioness/bibs_location/country	/m/03rk0
/m/06msq2	/award/award_nominee/award_nominations./award/award_nomination/award_nominee	/m/087qxp
/m/03d2k	/music/artist/track_contributions./music/track_contribution/role	/m/02sgy
/m/02qjj7	/people/person/profession	/m/0dxtg
/m/02g75	/award/award_nominee/award_nominations./award/award_nomination/award	/m/040v3t
/m/0dr_9t7	/film/film/film_format	/m/0cj16
/m/0fc_9	/location/statistical_region/rent50_2./measurement_unit/dated_money_value/currency	/m/09nqf
/m/016s0m	/award/award_nominee/award_nominations./award/award_nomination/award	/m/01bgqh
/m/016tt2	/film/film_distributor/films_distributed./film/film_film_distributor_relationship/film	/m/03bdkd
/m/045zr	/award/award_winner/awards_won./award/award_honor/award_winner	/m/0lccn
/m/0h7x	/olympics/olympic_participating_country/athletes./olympics/olympic_athlete_affiliation/olympics	/m/0swbd
/m/02l3_5	/film/actor/film./film/performance/film	/m/0291ck
/m/0mcf4	/music/record_label/artist	/m/01lcxbb
/m/02_t2t	/people/person/spouse_s./people/marriage/type_of_union	/m/04ztj
/m/0bqthy	/base/marchmadness/ncaa_basketball_tournament/seeds./base/marchmadness/ncaa_tournament_seed/team	/m/027yf83
/m/049_zz	/award/award_winner/awards_won./award/award_honor/award_winner	/m/01w_10
/m/07t3gd	/business/job_title/people_with_this_title./business/employment_tenure/company	/m/01t38b
/m/03rhqg	/music/record_label/artist	/m/0qf3p
/m/01w40h	/music/record_label/artist	/m/01w02sy
/m/05sy_5	/award/award_winning_work/awards_won./award/award_honor/award_winner	/m/06g2d1
/m/05wkw	/people/profession/specialization_of	/m/0n1h
/m/07zl1	/award/award_nominee/award_nominations./award/award_nomination/award	/m/0262x6
/m/0322yj	/film/film/language	/m/064_8sq
/m/03jldb	/tv/tv_writer/tv_programs./tv/tv_program_writer_relationship/tv_program	/m/019nnl
/m/071ywj	/award/award_nominee/award_nominations./award/award_nomination/award_nominee	/m/04wp3s
/m/05pdh86	/film/film/genre	/m/02l7c8
/m/015lhm	/people/person/spouse_s./people/marriage/type_of_union	/m/04ztj
/m/040njc	/award/award_category/winners./award/award_honor/award_winner	/m/02hh8j
/m/06wjf	/travel/travel_destination/how_to_get_here./travel/transportation/mode_of_transportation	/m/01bjv
/m/02lnhv	/film/actor/film./film/performance/film	/m/05n6sq
/m/06c1y	/military/military_combatant/military_conflicts./military/military_combatant_group/combatants	/m/06npd
/m/04q7r	/music/performance_role/track_performances./music/track_contribution/role	/m/07brj
/m/02vtnf	/award/award_nominee/award_nominations./award/award_nomination/nominated_for	/m/0gcrg
/m/0fpj4lx	/music/artist/track_contributions./music/track_contribution/role	/m/02sgy
/m/01j5ql	/film/film/other_crew./film/film_crew_gig/film_crew_role	/m/09zzb8
/m/0ywqc	/award/award_nominee/award_nominations./award/award_nomination/award	/m/0bdwqv
/m/067nsm	/music/artist/track_contributions./music/track_contribution/role	/m/01vdm0
/m/0j3v	/influence/influence_node/influenced_by	/m/043s3
/m/01q_ph	/award/award_nominee/award_nominations./award/award_nomination/award_nominee	/m/0mdqp
/m/032_wv	/award/award_winning_work/awards_won./award/award_honor/award_winner	/m/05m883
/m/04sry	/people/person/religion	/m/0c8wxp
/m/0m3gy	/film/film/release_date_s./film/film_regional_release_date/film_release_region	/m/0chghy
/m/01nz1q6	/people/person/spouse_s./people/marriage/spouse	/m/01vsl3_
/m/02gkzs	/government/legislative_session/members./government/government_position_held/legislative_sessions	/m/032ft5
/m/03gvt	/music/performance_role/track_performances./music/track_contribution/role	/m/0gkd1
/m/02f6s3	/people/deceased_person/place_of_death	/m/0r89d
/m/0d3qd0	/people/person/profession	/m/099md
/m/03ckfl9	/music/genre/artists	/m/03c7ln
/m/0g8st4	/award/award_nominee/award_nominations./award/award_nomination/award_nominee	/m/07s8r0
/m/027dtv3	/award/award_nominee/award_nominations./award/award_nomination/award_nominee	/m/08w7vj
/m/076psv	/film/film_set_designer/film_sets_designed	/m/0bj25
/m/0prfz	/people/person/gender	/m/05zppz
/m/02p2zq	/music/artist/track_contributions./music/track_contribution/role	/m/0l14qv
/m/07s9rl0	/media_common/netflix_genre/titles	/m/04xg2f
/m/0187nd	/education/educational_institution/students_graduates./education/education/student	/m/06rgq
/m/05lb87	/award/award_winner/awards_won./award/award_honor/award_winner	/m/09btt1
/m/02h4rq6	/education/educational_degree/people_with_this_degree./education/education/institution	/m/04jhp
/m/04wp3s	/award/award_nominee/award_nominations./award/award_nomination/award_nominee	/m/015pvh
/m/05zr0xl	/tv/tv_program/genre	/m/0c4xc
/m/0bv8h2	/film/film/language	/m/02h40lc
/m/03cw411	/film/film/other_crew./film/film_crew_gig/film_crew_role	/m/02r96rf
/m/01h4rj	/people/person/spouse_s./people/marriage/type_of_union	/m/04ztj
/m/028kb	/base/localfood/seasonal_month/produce_available./base/localfood/produce_availability/seasonal_months	/m/04wzr
/m/014j1m	/food/food/nutrients./food/nutrition_fact/nutrient	/m/02kcv4x
/m/01hx2t	/education/educational_institution/students_graduates./education/education/major_field_of_study	/m/0g26h
/m/05qtj	/location/location/time_zones	/m/02llzg
/m/02k84w	/music/instrument/instrumentalists	/m/01mwsnc
/m/0_b9f	/film/film/runtime./film/film_cut/film_release_region	/m/0chghy
/m/01wmxfs	/base/popstra/celebrity/dated./base/popstra/dated/participant	/m/02ts3h
/m/07f1x	/military/military_combatant/military_conflicts./military/military_combatant_group/combatants	/m/0chghy
/m/0169dl	/award/award_winner/awards_won./award/award_honor/award_winner	/m/06cgy
/m/01vsksr	/people/person/gender	/m/05zppz
/m/023361	/award/award_nominee/award_nominations./award/award_nomination/award	/m/054krc
/m/01zg98	/people/person/place_of_birth	/m/030qb3t
/m/07qg8v	/film/film/release_date_s./film/film_regional_release_date/film_release_region	/m/03gj2
/m/016yxn	/film/film/music	/m/07q1v4
/m/02mt4k	/award/award_winner/awards_won./award/award_honor/award_winner	/m/04bdxl
/m/019pm_	/award/award_winner/awards_won./award/award_honor/award_winner	/m/01chc7
/m/03_b1g	/tv/tv_program/regular_cast./tv/regular_tv_appearance/actor	/m/035wq7
/m/052hl	/award/award_winner/awards_won./award/award_honor/award_winner	/m/027l0b
/m/013d_f	/location/hud_county_place/county	/m/0njlp
/m/02h4rq6	/education/educational_degree/people_with_this_degree./education/education/institution	/m/0221g_
/m/0209hj	/film/film/genre	/m/07s9rl0
/m/0g9wdmc	/film/film/release_date_s./film/film_regional_release_date/film_release_region	/m/0154j
/m/01xn5th	/sports/sports_team/colors	/m/019sc
/m/01v0fn1	/people/person/gender	/m/05zppz
/m/02r5dz	/business/business_operation/operating_income./measurement_unit/dated_money_value/currency	/m/09nqf
/m/0140t7	/award/award_nominee/award_nominations./award/award_nomination/award	/m/02x17c2
/m/025ts_z	/film/film/other_crew./film/film_crew_gig/film_crew_role	/m/09zzb8
/m/02825nf	/film/film/release_date_s./film/film_regional_release_date/film_release_region	/m/04gzd
/m/03rk0	/location/location/contains	/m/03p7r
/m/04kxsb	/award/award_category/nominees./award/award_nomination/nominated_for	/m/016mhd
/m/03nm_fh	/award/award_winning_work/awards_won./award/award_honor/award_winner	/m/07ldhs
/m/01cspq	/award/award_nominee/award_nominations./award/award_nomination/award	/m/0czp_
/m/011wtv	/film/film/production_companies	/m/016tt2
/m/04ztj	/people/marriage_union_type/unions_of_this_type./people/marriage/location_of_ceremony	/m/04bz2f
/m/01vyp_	/people/person/profession	/m/01c72t
/m/0gnkb	/award/award_winning_work/awards_won./award/award_honor/award_winner	/m/025vry
/m/0n_hp	/film/film/other_crew./film/film_crew_gig/film_crew_role	/m/0ch6mp2
/m/09sdmz	/award/award_category/winners./award/award_honor/award_winner	/m/0f7hc
/m/0f5mdz	/award/award_nominee/award_nominations./award/award_nomination/nominated_for	/m/03cvwkr
/m/01vvydl	/award/award_nominee/award_nominations./award/award_nomination/award_nominee	/m/01vvyc_
/m/027_sn	/film/actor/film./film/performance/film	/m/0ddjy
/m/05vsb7	/sports/sports_league_draft/picks./sports/sports_league_draft_pick/school	/m/02pptm
/m/017gl1	/award/award_winning_work/awards_won./award/award_honor/award_winner	/m/05bm4sm
/m/017z49	/film/film/release_date_s./film/film_regional_release_date/film_release_region	/m/015fr
/m/04h68j	/award/award_nominee/award_nominations./award/award_nomination/award_nominee	/m/027hnjh
/m/0487_	/sports/professional_sports_team/draft_picks./sports/sports_league_draft_pick/draft	/m/05vsb7
/m/0jcx	/influence/influence_node/influenced_by	/m/026lj
/m/0c3351	/media_common/netflix_genre/titles	/m/032sl_
/m/08c6k9	/film/film/other_crew./film/film_crew_gig/film_crew_role	/m/01vx2h
/m/0277990	/award/award_nominee/award_nominations./award/award_nomination/award	/m/0cqhk0
/m/01wmxfs	/people/person/gender	/m/05zppz
/m/03s2y9	/people/deceased_person/place_of_death	/m/06_kh
/m/08w7vj	/award/award_nominee/award_nominations./award/award_nomination/award_nominee	/m/0dyztm
/m/0g5b0q5	/award/award_ceremony/awards_presented./award/award_honor/award_winner	/m/02zj61
/m/034bgm	/base/popstra/celebrity/dated./base/popstra/dated/participant	/m/016vg8
/m/0234_c	/education/educational_institution/students_graduates./education/education/student	/m/01kgv4
/m/02qk3fk	/film/film/release_date_s./film/film_regional_release_date/film_release_region	/m/0h7x
/m/032v0v	/award/award_nominee/award_nominations./award/award_nomination/nominated_for	/m/0b76d_m
/m/04_1nk	/film/film_set_designer/film_sets_designed	/m/027ct7c
/m/052hl	/film/actor/film./film/performance/film	/m/07tw_b
/m/04svwx	/tv/tv_program/languages	/m/03_9r
/m/01h910	/people/person/religion	/m/0c8wxp
/m/051kd	/tv/tv_program/languages	/m/03_9r
/m/01xlqd	/film/film/language	/m/02h40lc
/m/07q1v4	/award/award_nominee/award_nominations./award/award_nomination/award	/m/025m8y
/m/0mkg	/music/performance_role/regular_performances./music/group_membership/group	/m/018ndc
/m/0166v	/location/statistical_region/gdp_nominal./measurement_unit/dated_money_value/currency	/m/09nqf
/m/0275_pj	/award/award_winner/awards_won./award/award_honor/award_winner	/m/0265v21
/m/04wvhz	/tv/tv_producer/programs_produced./tv/tv_producer_term/program	/m/0dsx3f
/m/027pfg	/film/film/release_date_s./film/film_regional_release_date/film_release_region	/m/0b90_r
/m/04q7r	/music/performance_role/track_performances./music/track_contribution/role	/m/01vdm0
/m/04hqbbz	/people/person/places_lived./people/place_lived/location	/m/023vwt
/m/02s5v5	/film/actor/film./film/performance/film	/m/02r858_
/m/05fjf	/location/location/contains	/m/0n5gq
/m/015wfg	/people/person/places_lived./people/place_lived/location	/m/0xmqf
/m/025ts_z	/film/film/other_crew./film/film_crew_gig/film_crew_role	/m/089fss
/m/05cx7x	/film/actor/film./film/performance/film	/m/03xf_m
/m/0q9t7	/people/person/languages	/m/02h40lc
/m/0k269	/people/person/spouse_s./people/marriage/type_of_union	/m/04ztj
/m/01y9r2	/film/film/other_crew./film/film_crew_gig/film_crew_role	/m/02r96rf
/m/0dl5d	/music/genre/artists	/m/07hgm
/m/02_xgp2	/education/educational_degree/people_with_this_degree./education/education/major_field_of_study	/m/06mnr
/m/025vry	/people/person/nationality	/m/0h7x
/m/0l14qv	/music/performance_role/track_performances./music/track_contribution/role	/m/05842k
/m/051ysmf	/people/person/profession	/m/089fss
/m/02_xgp2	/education/educational_degree/people_with_this_degree./education/education/institution	/m/01n6r0
/m/012ycy	/base/schemastaging/person_extra/net_worth./measurement_unit/dated_money_value/currency	/m/09nqf
/m/018mxj	/base/schemastaging/organization_extra/phone_number./base/schemastaging/phone_sandbox/service_location	/m/02j71
/m/080nwsb	/film/film/genre	/m/05p553
/m/0_24q	/location/location/time_zones	/m/02hcv8
/m/09gdm7q	/film/film/genre	/m/07s9rl0
/m/02h4rq6	/education/educational_degree/people_with_this_degree./education/education/institution	/m/0187nd
/m/02qvhbb	/people/person/nationality	/m/03rk0
/m/012mzw	/education/educational_institution/students_graduates./education/education/major_field_of_study	/m/0193x
/m/05d1dy	/people/person/gender	/m/05zppz
/m/0gy7bj4	/film/film/release_date_s./film/film_regional_release_date/film_release_region	/m/0chghy
/m/02d02	/sports/professional_sports_team/draft_picks./sports/sports_league_draft_pick/draft	/m/02x2khw
/m/02qw_v	/education/educational_institution/students_graduates./education/education/major_field_of_study	/m/0l5mz
/m/031zp2	/soccer/football_team/current_roster./sports/sports_team_roster/position	/m/0dgrmp
/m/01qmy04	/award/award_nominee/award_nominations./award/award_nomination/award	/m/03m79j_
/m/01y9xg	/people/person/place_of_birth	/m/030qb3t
/m/02qgyv	/award/award_nominee/award_nominations./award/award_nomination/award	/m/0789_m
/m/027m5wv	/film/film/other_crew./film/film_crew_gig/film_crew_role	/m/0ch6mp2
/m/02r4qs	/award/award_nominee/award_nominations./award/award_nomination/award	/m/02x17c2
/m/04qz6n	/award/award_nominee/award_nominations./award/award_nomination/award_nominee	/m/0210hf
/m/0824r	/location/location/time_zones	/m/02fqwt
/m/02r5dz	/base/schemastaging/organization_extra/phone_number./base/schemastaging/phone_sandbox/contact_category	/m/03w5xm
/m/027jq2	/people/person/profession	/m/0dxtg
/m/024my5	/people/person/profession	/m/0np9r
/m/02ny8t	/music/genre/artists	/m/04f7c55
/m/03nx8mj	/film/film/language	/m/02h40lc
/m/0ndsl1x	/film/film/release_date_s./film/film_regional_release_date/film_release_region	/m/0chghy
/m/049_zz	/award/award_nominee/award_nominations./award/award_nomination/award_nominee	/m/02qssrm
/m/02s6sh	/music/artist/track_contributions./music/track_contribution/role	/m/0l14qv
/m/01hjy5	/education/educational_institution/colors	/m/036k5h
/m/02_j1w	/sports/sports_position/players./sports/sports_team_roster/team	/m/0f6cl2
/m/03pmfw	/organization/organization/place_founded	/m/07dfk
/m/02g8mp	/award/award_category/winners./award/award_honor/ceremony	/m/09n4nb
/m/06c0ns	/award/award_winning_work/awards_won./award/award_honor/honored_for	/m/04cbbz
/m/011wtv	/film/film/film_format	/m/07fb8_
/m/035d1m	/olympics/olympic_sport/athletes./olympics/olympic_athlete_affiliation/olympics	/m/0jhn7
/m/0drnwh	/film/film/genre	/m/07s9rl0
/m/05mt6w	/award/award_nominee/award_nominations./award/award_nomination/award	/m/054krc
/m/0863x_	/base/schemastaging/person_extra/net_worth./measurement_unit/dated_money_value/currency	/m/09nqf
/m/048wrb	/award/award_nominee/award_nominations./award/award_nomination/award_nominee	/m/062ftr
/m/02w4v	/music/genre/artists	/m/018ndc
/m/054ky1	/award/award_category/winners./award/award_honor/award_winner	/m/0k9j_
/m/055td_	/film/film/estimated_budget./measurement_unit/dated_money_value/currency	/m/09nqf
/m/06r1k	/tv/tv_program/genre	/m/07s9rl0
/m/06c62	/travel/travel_destination/climate./travel/travel_destination_monthly_climate/month	/m/028kb
/m/02t__l	/award/award_nominee/award_nominations./award/award_nomination/award	/m/09qvc0
/m/02l5rm	/people/person/profession	/m/0dxtg
/m/02g1jh	/people/person/profession	/m/01c72t
/m/01dy7j	/award/award_nominee/award_nominations./award/award_nomination/award_nominee	/m/01l1sq
/m/07l8f	/sports/sports_team/sport	/m/018jz
/m/01w_10	/award/award_winner/awards_won./award/award_honor/award_winner	/m/049_zz
/m/0c53zb	/award/award_ceremony/awards_presented./award/award_honor/honored_for	/m/0k419
/m/0dckvs	/film/film/other_crew./film/film_crew_gig/film_crew_role	/m/09zzb8
/m/0xnvg	/people/ethnicity/people	/m/02lg3y
/m/013pk3	/base/schemastaging/person_extra/net_worth./measurement_unit/dated_money_value/currency	/m/09nqf
/m/07hwkr	/people/ethnicity/people	/m/0157m
/m/019pkm	/people/person/profession	/m/0dxtg
/m/0ph2w	/influence/influence_node/influenced_by	/m/01t9qj_
/m/0bzmt8	/award/award_ceremony/awards_presented./award/award_honor/award_winner	/m/01vttb9
/m/07j87	/food/food/nutrients./food/nutrition_fact/nutrient	/m/025s7x6
/m/01_lhg	/base/x2010fifaworldcupsouthafrica/world_cup_squad/current_world_cup_squad./base/x2010fifaworldcupsouthafrica/current_world_cup_squad/current_club	/m/0138mv
/m/02h4rq6	/education/educational_degree/people_with_this_degree./education/education/institution	/m/0dplh
/m/0159r9	/education/educational_institution/students_graduates./education/education/student	/m/02z2xdf
/m/0pd64	/film/film/language	/m/064_8sq
/m/0cc5qkt	/film/film/other_crew./film/film_crew_gig/film_crew_role	/m/0ch6mp2
/m/02q636	/business/business_operation/revenue./measurement_unit/dated_money_value/currency	/m/09nqf
/m/01clyr	/music/record_label/artist	/m/0889x
/m/04s5_s	/music/artist/track_contributions./music/track_contribution/role	/m/0gkd1
/m/0175rc	/soccer/football_team/current_roster./sports/sports_team_roster/position	/m/0dgrmp
/m/07j8r	/film/film/genre	/m/02l7c8
/m/011ywj	/film/film/genre	/m/05p553
/m/04zl8	/film/film/genre	/m/04xvh5
/m/02xtxw	/film/film/other_crew./film/film_crew_gig/film_crew_role	/m/0ch6mp2
/m/014v6f	/award/award_nominee/award_nominations./award/award_nomination/award	/m/09sb52
/m/014z8v	/influence/influence_node/influenced_by	/m/01wp_jm
/m/040b5k	/film/film/release_date_s./film/film_regional_release_date/film_release_region	/m/0chghy
/m/0h0wd9	/film/film/genre	/m/02l7c8
/m/025ljp	/tv/tv_program/regular_cast./tv/regular_tv_appearance/actor	/m/01nd6v
/m/06jntd	/film/film_distributor/films_distributed./film/film_film_distributor_relationship/film	/m/065dc4
/m/03zg2x	/award/award_nominee/award_nominations./award/award_nomination/award_nominee	/m/02mt4k
/m/01p3ty	/film/film/other_crew./film/film_crew_gig/film_crew_role	/m/09zzb8
/m/0686zv	/award/award_winner/awards_won./award/award_honor/award_winner	/m/02qgyv
/m/0289q	/sports/sports_team/colors	/m/01g5v
/m/0661ql3	/film/film/release_date_s./film/film_regional_release_date/film_release_region	/m/04gzd
/m/0lkr7	/people/person/languages	/m/02h40lc
/m/01l1sq	/award/award_nominee/award_nominations./award/award_nomination/award_nominee	/m/021_rm
/m/02r4qs	/award/award_nominee/award_nominations./award/award_nomination/award	/m/02nhxf
/m/015pvh	/people/person/religion	/m/0c8wxp
/m/01y9r2	/film/film/other_crew./film/film_crew_gig/film_crew_role	/m/09vw2b7
/m/07brj	/music/instrument/instrumentalists	/m/01vsqvs
/m/060__7	/film/film/other_crew./film/film_crew_gig/film_crew_role	/m/02r96rf
/m/01l4g5	/music/artist/track_contributions./music/track_contribution/role	/m/07brj
/m/02hh8j	/people/person/profession	/m/0dxtg
/m/0n85g	/music/record_label/artist	/m/0135xb
/m/0l15f_	/music/instrument/family	/m/0l14j_
/m/03cz83	/education/educational_institution/school_type	/m/01rs41
/m/04cl1	/award/award_nominee/award_nominations./award/award_nomination/award_nominee	/m/02wk_43
/m/01v_pj6	/people/person/profession	/m/0fnpj
/m/029ql	/award/award_winner/awards_won./award/award_honor/award_winner	/m/0k9j_
/m/01vs_v8	/base/popstra/celebrity/canoodled./base/popstra/canoodled/participant	/m/0m68w
/m/02s6sh	/music/artist/track_contributions./music/track_contribution/role	/m/02sgy
/m/09sb52	/award/award_category/winners./award/award_honor/award_winner	/m/02l4pj
/m/06m_5	/location/location/adjoin_s./location/adjoining_relationship/adjoins	/m/03rk0
/m/0187nd	/education/educational_institution/students_graduates./education/education/student	/m/0l786
/m/0136g9	/people/person/spouse_s./people/marriage/type_of_union	/m/04ztj
/m/08l0x2	/film/film/genre	/m/07s9rl0
/m/0bv8h2	/film/film/other_crew./film/film_crew_gig/film_crew_role	/m/09zzb8
/m/0h63gl9	/film/film/release_date_s./film/film_regional_release_date/film_release_region	/m/015fr
/m/01rc4p	/people/person/place_of_birth	/m/094jv
/m/06mr6	/people/person/gender	/m/05zppz
/m/05p09zm	/award/award_category/nominees./award/award_nomination/nominated_for	/m/05pdh86
/m/02kcz	/location/statistical_region/gdp_real./measurement_unit/adjusted_money_value/adjustment_currency	/m/09nqf
/m/0640m69	/film/film/genre	/m/05p553
/m/03177r	/film/film/distributors./film/film_film_distributor_relationship/film_distribution_medium	/m/0dq6p
/m/02dth1	/film/actor/film./film/performance/film	/m/07cw4
/m/02_j1w	/sports/sports_position/players./sports/sports_team_roster/team	/m/02qhlm
/m/05qbckf	/film/film/release_date_s./film/film_regional_release_date/film_release_region	/m/0f8l9c
/m/087pfc	/film/film/release_date_s./film/film_regional_release_date/film_release_region	/m/03rjj
/m/0c422z4	/award/award_category/nominees./award/award_nomination/nominated_for	/m/02825kb
/m/02x6dqb	/film/film/language	/m/02h40lc
/m/06rf7	/location/location/contains	/m/0g7pm
/m/03177r	/film/film/other_crew./film/film_crew_gig/film_crew_role	/m/01vx2h
/m/0154j	/location/location/contains	/m/0fydw
/m/011yg9	/film/film/genre	/m/02l7c8
/m/01vnt4	/music/performance_role/regular_performances./music/group_membership/role	/m/0l14md
/m/09d6p2	/business/job_title/people_with_this_title./business/employment_tenure/company	/m/018c_r
/m/0v9qg	/base/biblioness/bibs_location/state	/m/04rrx
/m/0fp_xp	/sports/pro_athlete/teams./sports/sports_team_roster/team	/m/01kc4s
/m/01w40h	/music/record_label/artist	/m/0dw4g
/m/0h3k3f	/award/award_winning_work/awards_won./award/award_honor/award_winner	/m/0171lb
/m/045bg	/influence/influence_node/influenced_by	/m/02ln1
/m/03jxw	/influence/influence_node/influenced_by	/m/05gpy
/m/017gl1	/film/film/language	/m/02h40lc
/m/025hzx	/award/award_nominee/award_nominations./award/award_nomination/award_nominee	/m/07rd7
/m/03qnc6q	/film/film/genre	/m/07s9rl0
/m/02ptczs	/film/film/estimated_budget./measurement_unit/dated_money_value/currency	/m/09nqf
/m/047xyn	/award/award_category/winners./award/award_honor/award_winner	/m/040db
/m/05842k	/music/performance_role/track_performances./music/track_contribution/role	/m/0l14j_
/m/01tcf7	/award/award_nominee/award_nominations./award/award_nomination/nominated_for	/m/0b4lkx
/m/040njc	/award/award_category/nominees./award/award_nomination/nominated_for	/m/0gl3hr
/m/03h304l	/people/person/gender	/m/05zppz
/m/02v1m7	/award/award_category/winners./award/award_honor/award_winner	/m/01v_pj6
/m/023qfd	/people/person/spouse_s./people/marriage/type_of_union	/m/04ztj
/m/0jt90f5	/people/person/place_of_birth	/m/0c4kv
/m/0yxl	/people/person/profession	/m/0n1h
/m/0jmfv	/sports/sports_team/roster./basketball/basketball_roster_position/position	/m/01pv51
/m/0lp_cd3	/award/award_ceremony/awards_presented./award/award_honor/honored_for	/m/0hr41p6
/m/0151w_	/base/popstra/celebrity/friendship./base/popstra/friendship/participant	/m/029q_y
/m/0d87hc	/award/award_winning_work/awards_won./award/award_honor/award_winner	/m/0f7hc
/m/01nn3m	/award/award_nominee/award_nominations./award/award_nomination/award	/m/054ks3
/m/019pm_	/base/popstra/celebrity/dated./base/popstra/dated/participant	/m/0h7pj
/m/01jzxy	/education/field_of_study/students_majoring./education/education/student	/m/0bq2g
/m/06hgj	/influence/influence_node/influenced_by	/m/04hcw
/m/054ky1	/award/award_category/winners./award/award_honor/ceremony	/m/09pnw5
/m/01xwv7	/influence/influence_node/influenced_by	/m/0f7hc
/m/01xdn1	/base/schemastaging/organization_extra/phone_number./base/schemastaging/phone_sandbox/service_language	/m/02h40lc
/m/052h3	/people/person/profession	/m/0frz0
/m/01zg98	/award/award_winner/awards_won./award/award_honor/award_winner	/m/01qscs
/m/05b6rdt	/film/film/release_date_s./film/film_regional_release_date/film_release_region	/m/03rjj
/m/01c92g	/award/award_category/winners./award/award_honor/ceremony	/m/013b2h
/m/02ck7w	/award/award_winner/awards_won./award/award_honor/award_winner	/m/01rh0w
/m/0jtg0	/music/performance_role/track_performances./music/track_contribution/role	/m/014zz1
/m/0h3y	/location/statistical_region/gdp_real./measurement_unit/adjusted_money_value/adjustment_currency	/m/09nqf
/m/03ldxq	/base/schemastaging/person_extra/net_worth./measurement_unit/dated_money_value/currency	/m/09nqf
/m/0c53zb	/award/award_ceremony/awards_presented./award/award_honor/honored_for	/m/0k4bc
/m/05_5rjx	/film/film/genre	/m/07s9rl0
/m/05_5rjx	/film/film/other_crew./film/film_crew_gig/film_crew_role	/m/09vw2b7
/m/0m31m	/award/award_nominee/award_nominations./award/award_nomination/award_nominee	/m/01tspc6
/m/02zyy4	/people/person/profession	/m/05z96
/m/02_xgp2	/education/educational_degree/people_with_this_degree./education/education/institution	/m/01jsk6
/m/0bv7t	/award/award_nominee/award_nominations./award/award_nomination/award	/m/04hddx
/m/04n1hqz	/soccer/football_team/current_roster./sports/sports_team_roster/position	/m/02_j1w
/m/01c6l	/people/person/profession	/m/0dxtg
/m/017jd9	/award/award_winning_work/awards_won./award/award_honor/award_winner	/m/01v9l67
/m/03lty	/music/genre/artists	/m/0134pk
/m/06pj8	/tv/tv_producer/programs_produced./tv/tv_producer_term/program	/m/025x1t
/m/0bh8yn3	/film/film/release_date_s./film/film_regional_release_date/film_release_region	/m/0154j
/m/02nx2k	/film/film/genre	/m/0h9qh
/m/083chw	/award/award_nominee/award_nominations./award/award_nomination/award_nominee	/m/05l0j5
/m/04sylm	/education/educational_institution/students_graduates./education/education/student	/m/02ryx0
/m/081pw	/time/event/locations	/m/05rgl
/m/04rlf	/education/field_of_study/students_majoring./education/education/student	/m/03_l8m
/m/015dcj	/film/actor/film./film/performance/film	/m/0m_mm
/m/01t6b4	/people/person/religion	/m/01lp8
/m/015t56	/award/award_nominee/award_nominations./award/award_nomination/award_nominee	/m/01ps2h8
/m/0xzly	/music/performance_role/regular_performances./music/group_membership/role	/m/0gkd1
/m/013sg6	/film/actor/film./film/performance/film	/m/0kbf1
/m/054yc0	/film/film_subject/films	/m/02825nf
/m/0262x6	/award/award_category/winners./award/award_honor/award_winner	/m/02y49
/m/09sdmz	/award/award_category/winners./award/award_honor/award_winner	/m/014v6f
/m/06x76	/sports/professional_sports_team/draft_picks./sports/sports_league_draft_pick/school	/m/01hx2t
/m/0g54xkt	/film/film/other_crew./film/film_crew_gig/film_crew_role	/m/0dxtw
/m/03bx2lk	/film/film/release_date_s./film/film_regional_release_date/film_release_region	/m/05b4w
/m/0bpm4yw	/film/film/release_date_s./film/film_regional_release_date/film_release_region	/m/07ylj
/m/05mkhs	/people/person/gender	/m/05zppz
/m/07l8x	/sports/professional_sports_team/draft_picks./sports/sports_league_draft_pick/draft	/m/02rl201
/m/013yq	/location/location/contains	/m/03818y
/m/014mlp	/education/educational_degree/people_with_this_degree./education/education/institution	/m/02897w
/m/057pq5	/soccer/football_team/current_roster./soccer/football_roster_position/position	/m/0dgrmp
/m/05hyzx	/sports/sports_team/colors	/m/01g5v
/m/018ndc	/award/award_nominee/award_nominations./award/award_nomination/award	/m/01bgqh
/m/019f2f	/award/award_nominee/award_nominations./award/award_nomination/nominated_for	/m/01gvts
/m/05b6rdt	/film/film/release_date_s./film/film_regional_release_date/film_release_region	/m/0154j
/m/05qbckf	/film/film/language	/m/064_8sq
/m/03hp2y1	/film/film/language	/m/02h40lc
/m/0gjv_	/education/educational_institution/students_graduates./education/education/student	/m/02k6rq
/m/0f9rw9	/base/marchmadness/ncaa_basketball_tournament/seeds./base/marchmadness/ncaa_tournament_seed/team	/m/02pjzvh
/m/06jd89	/soccer/football_team/current_roster./sports/sports_team_roster/position	/m/02_j1w
/m/011yd2	/film/film/other_crew./film/film_crew_gig/film_crew_role	/m/09zzb8
/m/016kkx	/base/popstra/celebrity/friendship./base/popstra/friendship/participant	/m/0210hf
/m/05qhw	/base/aareas/schema/administrative_area/administrative_parent	/m/02j71
/m/0d9jr	/sports/sports_team_location/teams	/m/070xg
/m/0jqn5	/award/award_winning_work/awards_won./award/award_honor/award	/m/054krc
/m/02qlg7s	/award/award_nominee/award_nominations./award/award_nomination/award	/m/01bgqh
/m/0g_gl	/base/aareas/schema/administrative_area/administrative_parent	/m/0b90_r
/m/04vzv4	/people/deceased_person/place_of_death	/m/06_kh
/m/087pfc	/film/film/genre	/m/02l7c8
/m/01n8gr	/people/person/profession	/m/0n1h
/m/06x77g	/award/award_winning_work/awards_won./award/award_honor/award	/m/02w_6xj
/m/040njc	/award/award_category/nominees./award/award_nomination/nominated_for	/m/02dwj
/m/07ym0	/influence/influence_node/influenced_by	/m/043s3
/m/06r713	/government/legislative_session/members./government/government_position_held/district_represented	/m/05k7sb
/m/0pj8m	/people/person/profession	/m/01c72t
/m/0404wqb	/award/award_winner/awards_won./award/award_honor/award_winner	/m/096lf_
/m/0dcsx	/people/cause_of_death/people	/m/012vby
/m/0d4fqn	/award/award_nominee/award_nominations./award/award_nomination/award_nominee	/m/03xp8d5
/m/04vh83	/film/film/genre	/m/07s9rl0
/m/01900g	/influence/influence_node/influenced_by	/m/0f7hc
/m/0gfsq9	/film/film/estimated_budget./measurement_unit/dated_money_value/currency	/m/09nqf
/m/02sgy	/music/performance_role/track_performances./music/track_contribution/role	/m/01qbl
/m/03z20c	/film/film/other_crew./film/film_crew_gig/film_crew_role	/m/089fss
/m/030hbp	/base/popstra/celebrity/dated./base/popstra/dated/participant	/m/030hcs
/m/01vqc7	/soccer/football_team/current_roster./sports/sports_team_roster/position	/m/0dgrmp
/m/01vs_v8	/award/award_nominee/award_nominations./award/award_nomination/award	/m/02x17c2
/m/02_j1w	/sports/sports_position/players./sports/sports_team_roster/team	/m/0175tv
/m/027pfg	/film/film/language	/m/02h40lc
/m/02hft3	/organization/non_profit_organization/registered_with./organization/non_profit_registration/registering_agency	/m/03z19
/m/0dzt9	/location/location/time_zones	/m/02hcv8
/m/016yvw	/award/award_nominee/award_nominations./award/award_nomination/award	/m/04kxsb
/m/0209hj	/film/film/music	/m/0pj8m
/m/017w_	/sports/sports_team_location/teams	/m/0266bd5
/m/0bxy67	/people/person/nationality	/m/03rk0
/m/02x0bdb	/award/award_winner/awards_won./award/award_honor/award_winner	/m/01t9qj_
/m/0k4fz	/film/film/release_date_s./film/film_regional_release_date/film_release_region	/m/0chghy
/m/07b3r9	/people/person/spouse_s./people/marriage/type_of_union	/m/04ztj
/m/04h68j	/people/person/profession	/m/0dxtg
/m/01zh29	/people/person/religion	/m/0flw86
/m/01xlqd	/film/film/release_date_s./film/film_regional_release_date/film_release_region	/m/05b4w
/m/0mcf4	/music/record_label/artist	/m/02pbrn
/m/0g9wdmc	/film/film/release_date_s./film/film_regional_release_date/film_release_region	/m/03rjj
/m/041rx	/people/ethnicity/people	/m/0h0yt
/m/0d_wms	/film/film/estimated_budget./measurement_unit/dated_money_value/currency	/m/09nqf
/m/05p09dd	/film/film/genre	/m/07s9rl0
/m/0v9qg	/location/location/contains	/m/02grjf
/m/052hl	/people/person/profession	/m/0np9r
/m/012xdf	/sports/pro_athlete/teams./sports/sports_team_roster/team	/m/0bwjj
/m/0f0kz	/film/actor/film./film/performance/film	/m/0dfw0
/m/04b5n0	/soccer/football_team/current_roster./soccer/football_roster_position/position	/m/0dgrmp
/m/01xndd	/tv/tv_producer/programs_produced./tv/tv_producer_term/program	/m/0828jw
/m/01hznh	/soccer/football_team/current_roster./soccer/football_roster_position/position	/m/0dgrmp
/m/0262zm	/award/award_category/winners./award/award_honor/award_winner	/m/01963w
/m/04x56	/influence/influence_node/influenced_by	/m/040_9
/m/027b9j5	/award/award_category/winners./award/award_honor/award_winner	/m/0jvtp
/m/0c3351	/media_common/netflix_genre/titles	/m/04ddm4
/m/011xg5	/film/film/estimated_budget./measurement_unit/dated_money_value/currency	/m/09nqf
/m/07cw4	/award/award_winning_work/awards_won./award/award_honor/award_winner	/m/06cgy
/m/0f_nbyh	/award/award_category/nominees./award/award_nomination/nominated_for	/m/05hjnw
/m/0kr5_	/film/actor/film./film/performance/film	/m/0hx4y
/m/0qmfz	/award/award_winning_work/awards_won./award/award_honor/award_winner	/m/01g42
/m/0151xv	/award/award_nominee/award_nominations./award/award_nomination/award	/m/04kxsb
/m/05nlzq	/tv/tv_program/regular_cast./tv/regular_tv_appearance/actor	/m/024my5
/m/06t2t	/travel/travel_destination/climate./travel/travel_destination_monthly_climate/month	/m/02xx5
/m/02xtxw	/film/film/language	/m/02h40lc
/m/03s6l2	/film/film/featured_film_locations	/m/0b90_r
/m/0d3qd0	/government/politician/government_positions_held./government/government_position_held/legislative_sessions	/m/02bqm0
/m/02rybfn	/people/person/spouse_s./people/marriage/type_of_union	/m/04ztj
/m/06rhz7	/film/film/produced_by	/m/0147dk
/m/0l56b	/base/schemastaging/person_extra/net_worth./measurement_unit/dated_money_value/currency	/m/09nqf
/m/024rwx	/tv/tv_program/regular_cast./tv/regular_tv_appearance/actor	/m/03wy70
/m/021yw7	/tv/tv_producer/programs_produced./tv/tv_producer_term/program	/m/019nnl
/m/0h5f5n	/award/award_nominee/award_nominations./award/award_nomination/award_nominee	/m/02z2xdf
/m/0m_mm	/film/film/language	/m/02h40lc
/m/02d02	/baseball/baseball_team/team_stats./baseball/baseball_team_stats/season	/m/0285r5d
/m/04j14qc	/film/film/produced_by	/m/06cgy
/m/0584j4n	/award/award_nominee/award_nominations./award/award_nomination/award_nominee	/m/058vfp4
/m/0crx5w	/tv/tv_producer/programs_produced./tv/tv_producer_term/program	/m/05zr0xl
/m/026y23w	/soccer/football_player/current_team./sports/sports_team_roster/team	/m/02b1mc
/m/02_j1w	/sports/sports_position/players./sports/sports_team_roster/team	/m/01kkg5
/m/01m9f1	/location/statistical_region/rent50_2./measurement_unit/dated_money_value/currency	/m/09nqf
/m/04fc6c	/base/schemastaging/organization_extra/phone_number./base/schemastaging/phone_sandbox/contact_category	/m/03w5xm
/m/0fpj9pm	/base/popstra/celebrity/friendship./base/popstra/friendship/participant	/m/060j8b
/m/02f6s3	/people/person/gender	/m/05zppz
/m/07s467s	/people/profession/specialization_of	/m/06q2q
/m/0crx5w	/award/award_nominee/award_nominations./award/award_nomination/award_nominee	/m/01l_yg
/m/026g51	/music/genre/artists	/m/027hm_
/m/05t7c1	/organization/organization/headquarters./location/mailing_address/citytown	/m/03hrz
/m/0kft	/award/award_nominee/award_nominations./award/award_nomination/award	/m/040njc
/m/070j61	/award/award_winner/awards_won./award/award_honor/award_winner	/m/03fg0r
/m/09sb52	/award/award_category/winners./award/award_honor/award_winner	/m/01v9l67
/m/03hp2y1	/film/film/genre	/m/04t36
/m/012201	/award/award_nominee/award_nominations./award/award_nomination/award	/m/054krc
/m/0484q	/people/person/gender	/m/05zppz
/m/05l8y	/location/statistical_region/gdp_nominal_per_capita./measurement_unit/dated_money_value/currency	/m/09nqf
/m/01xlqd	/film/film/genre	/m/0hn10
/m/02qmncd	/award/award_nominee/award_nominations./award/award_nomination/award	/m/025m8y
/m/0jf1b	/people/person/spouse_s./people/marriage/type_of_union	/m/04ztj
/m/09qwmm	/award/award_category/nominees./award/award_nomination/nominated_for	/m/0g9wdmc
/m/02_xgp2	/education/educational_degree/people_with_this_degree./education/education/institution	/m/0885n
/m/049l7	/award/award_nominee/award_nominations./award/award_nomination/award	/m/02wkmx
/m/0343h	/people/person/gender	/m/05zppz
/m/031n5b	/education/educational_institution/students_graduates./education/education/major_field_of_study	/m/04rlf
/m/0bx8pn	/education/university/local_tuition./measurement_unit/dated_money_value/currency	/m/09nqf
/m/04nlb94	/film/film/country	/m/0d0vqn
/m/01738w	/film/film/other_crew./film/film_crew_gig/film_crew_role	/m/0ch6mp2
/m/02qgyv	/award/award_nominee/award_nominations./award/award_nomination/award_nominee	/m/02p65p
/m/011_6p	/music/performance_role/track_performances./music/track_contribution/role	/m/023r2x
/m/0dc_ms	/film/film/release_date_s./film/film_regional_release_date/film_release_region	/m/03rjj
/m/07s9rl0	/media_common/netflix_genre/titles	/m/08rr3p
/m/019lwb	/soccer/football_team/current_roster./soccer/football_roster_position/position	/m/02_j1w
/m/01xqw	/music/performance_role/track_performances./music/track_contribution/role	/m/0l14j_
/m/05pbl56	/film/film/other_crew./film/film_crew_gig/film_crew_role	/m/0d2b38
/m/01jz6x	/people/person/gender	/m/05zppz
/m/01n7q	/location/location/contains	/m/0r8bh
/m/06rgq	/base/popstra/celebrity/canoodled./base/popstra/canoodled/participant	/m/01vhb0
/m/0gv40	/base/popstra/celebrity/dated./base/popstra/dated/participant	/m/0h1m9
/m/01y665	/base/popstra/celebrity/friendship./base/popstra/friendship/participant	/m/0151w_
/m/040b5k	/film/film/film_format	/m/07fb8_
/m/0219q	/film/actor/film./film/performance/film	/m/0fq7dv_
/m/015fr	/base/popstra/location/vacationers./base/popstra/vacation_choice/vacationer	/m/01r93l
/m/01gglm	/film/film/estimated_budget./measurement_unit/dated_money_value/currency	/m/09nqf
/m/0ggbhy7	/film/film/other_crew./film/film_crew_gig/film_crew_role	/m/09zzb8
/m/03xgm3	/award/award_nominee/award_nominations./award/award_nomination/award_nominee	/m/07z542
/m/05n19y	/people/person/profession	/m/0nbcg
/m/02y_2y	/people/person/spouse_s./people/marriage/type_of_union	/m/04ztj
/m/07hwkr	/people/ethnicity/people	/m/01bcq
/m/011yqc	/film/film/other_crew./film/film_crew_gig/film_crew_role	/m/09zzb8
/m/0g54xkt	/film/film/genre	/m/03bxz7
/m/041rx	/people/ethnicity/people	/m/02v60l
/m/01817f	/people/person/profession	/m/0cbd2
/m/016zwt	/location/location/partially_contains	/m/09glw
/m/01p4vl	/award/award_nominee/award_nominations./award/award_nomination/award_nominee	/m/019pm_
/m/01c333	/education/educational_institution/students_graduates./education/education/major_field_of_study	/m/04rjg
/m/0cwx_	/education/educational_institution/students_graduates./education/education/major_field_of_study	/m/0g26h
/m/07jq_	/film/film_subject/films	/m/07j8r
/m/06rvn	/music/performance_role/track_performances./music/track_contribution/role	/m/0dwt5
/m/0l99s	/organization/organization_member/member_of./organization/organization_membership/organization	/m/03lb_v
/m/08cn4_	/award/award_nominee/award_nominations./award/award_nomination/award_nominee	/m/03nkts
/m/02z6fs	/education/educational_institution/students_graduates./education/education/major_field_of_study	/m/088tb
/m/0l14j_	/music/performance_role/regular_performances./music/group_membership/role	/m/05kms
/m/0bw87	/award/award_nominee/award_nominations./award/award_nomination/nominated_for	/m/03hj3b3
/m/05dfy_	/film/film/language	/m/03_9r
/m/07vfj	/education/educational_institution/colors	/m/01g5v
/m/07s9rl0	/media_common/netflix_genre/titles	/m/01hqhm
/m/0286hyp	/award/award_nominated_work/award_nominations./award/award_nomination/nominated_for	/m/0286gm1
/m/0gtvpkw	/film/film/genre	/m/02l7c8
/m/03c0t9	/soccer/football_team/current_roster./sports/sports_team_roster/position	/m/0dgrmp
/m/0640m69	/film/film/genre	/m/0556j8
/m/05g3ss	/people/person/languages	/m/02h40lc
/m/02_j1w	/sports/sports_position/players./sports/sports_team_roster/team	/m/01kkjq
/m/0mdqp	/award/award_nominee/award_nominations./award/award_nomination/nominated_for	/m/0bmssv
/m/03176f	/film/film/distributors./film/film_film_distributor_relationship/film_distribution_medium	/m/0dq6p
/m/0mdqp	/award/award_nominee/award_nominations./award/award_nomination/award_nominee	/m/0p_pd
/m/03gvt	/music/instrument/instrumentalists	/m/01z9_x
/m/0336mc	/people/person/spouse_s./people/marriage/spouse	/m/03_6y
/m/049w1q	/film/film/release_date_s./film/film_regional_release_date/film_release_region	/m/06qd3
/m/07jbh	/olympics/olympic_sport/athletes./olympics/olympic_athlete_affiliation/country	/m/06npd
/m/0crlz	/olympics/olympic_sport/athletes./olympics/olympic_athlete_affiliation/country	/m/03rjj
/m/02wtp6	/film/film/release_date_s./film/film_regional_release_date/film_release_region	/m/05b4w
/m/0gk4g	/people/cause_of_death/people	/m/02xgdv
/m/06wbm8q	/film/film/release_date_s./film/film_regional_release_date/film_release_region	/m/03rk0
/m/0c1jh	/influence/influence_node/influenced_by	/m/0379s
/m/0fk98	/base/biblioness/bibs_location/country	/m/03rk0
/m/02h4rq6	/education/educational_degree/people_with_this_degree./education/education/institution	/m/013719
/m/072hx4	/film/film/release_date_s./film/film_regional_release_date/film_release_region	/m/06npd
/m/09n4nb	/award/award_ceremony/awards_presented./award/award_honor/award_winner	/m/05y7hc
/m/01vvyc_	/award/award_nominee/award_nominations./award/award_nomination/award_nominee	/m/01wyz92
/m/05218gr	/award/award_nominee/award_nominations./award/award_nomination/award_nominee	/m/0579tg2
/m/06mmb	/film/actor/film./film/performance/film	/m/0gtsx8c
/m/0gls4q_	/people/person/places_lived./people/place_lived/location	/m/030qb3t
/m/02g8mp	/award/award_category/winners./award/award_honor/award_winner	/m/06p03s
/m/01njml	/soccer/football_team/current_roster./sports/sports_team_roster/position	/m/0dgrmp
/m/01bv8b	/award/award_winning_work/awards_won./award/award_honor/award_winner	/m/01h910
/m/02x8n1n	/award/award_category/nominees./award/award_nomination/nominated_for	/m/0symg
/m/0147dk	/people/person/gender	/m/05zppz
/m/02hh8j	/people/person/spouse_s./people/marriage/type_of_union	/m/04ztj
/m/0c53zb	/award/award_ceremony/awards_presented./award/award_honor/honored_for	/m/014knw
/m/019f2f	/people/person/religion	/m/0c8wxp
/m/07l50vn	/film/film/release_date_s./film/film_regional_release_date/film_release_region	/m/0154j
/m/025b5y	/award/award_nominee/award_nominations./award/award_nomination/award_nominee	/m/09f0bj
/m/0b_fw	/people/person/gender	/m/05zppz
/m/0b82vw	/music/artist/origin	/m/0f2r6
/m/0h1x5f	/film/film/genre	/m/05p553
/m/049w1q	/film/film/release_date_s./film/film_regional_release_date/film_release_region	/m/03rjj
/m/0bkmf	/people/person/gender	/m/05zppz
/m/02tf1y	/award/award_nominee/award_nominations./award/award_nomination/award_nominee	/m/0h7pj
/m/01jpmpv	/award/award_nominee/award_nominations./award/award_nomination/nominated_for	/m/0m_mm
/m/01v5h	/award/award_nominee/award_nominations./award/award_nomination/nominated_for	/m/0bl06
/m/01pgzn_	/award/award_nominee/award_nominations./award/award_nomination/award_nominee	/m/01p4vl
/m/07s9rl0	/media_common/netflix_genre/titles	/m/01y9r2
/m/0c40vxk	/film/film/release_date_s./film/film_regional_release_date/film_release_region	/m/0f8l9c
/m/0fhpv4	/award/award_category/nominees./award/award_nomination/nominated_for	/m/026p4q7
/m/016jfw	/people/person/profession	/m/0dxtg
/m/04xfb	/people/person/profession	/m/0cbd2
/m/0fby2t	/award/award_nominee/award_nominations./award/award_nomination/nominated_for	/m/0bq8tmw
/m/0qm9n	/film/film/release_date_s./film/film_regional_release_date/film_release_region	/m/03gj2
/m/02sgy	/music/performance_role/regular_performances./music/group_membership/role	/m/028tv0
/m/02_j1w	/sports/sports_position/players./sports/sports_team_roster/team	/m/02qjb_
/m/0bj25	/award/award_winning_work/awards_won./award/award_honor/award_winner	/m/02cj_f
/m/01xdn1	/award/ranked_item/appears_in_ranked_lists./award/ranking/list	/m/01pd60
/m/07s8r0	/award/award_nominee/award_nominations./award/award_nomination/award_nominee	/m/02p65p
/m/078jt5	/award/award_winner/awards_won./award/award_honor/award_winner	/m/05cqhl
/m/0xnvg	/people/ethnicity/people	/m/02g87m
/m/0dr_9t7	/film/film/other_crew./film/film_crew_gig/film_crew_role	/m/0ch6mp2
/m/03jvmp	/award/award_nominee/award_nominations./award/award_nomination/nominated_for	/m/03cv_gy
/m/06yxd	/location/location/time_zones	/m/02hcv8
/m/0517bc	/film/actor/film./film/performance/film	/m/0n_hp
/m/031n8c	/organization/organization/headquarters./location/mailing_address/state_province_region	/m/05k7sb
/m/015882	/award/award_nominee/award_nominations./award/award_nomination/award	/m/01ckbq
/m/03xkps	/award/award_nominee/award_nominations./award/award_nomination/nominated_for	/m/06w7mlh
/m/05k17c	/business/job_title/people_with_this_title./business/employment_tenure/company	/m/018sg9
/m/030qb3t	/location/location/contains	/m/0l1pj
/m/01yk13	/people/person/places_lived./people/place_lived/location	/m/030qb3t
/m/05qmj	/people/person/gender	/m/05zppz
/m/0152n0	/olympics/olympic_sport/athletes./olympics/olympic_athlete_affiliation/country	/m/0f8l9c
/m/0168cl	/award/award_nominee/award_nominations./award/award_nomination/award	/m/026mfs
/m/0dh8v4	/film/film/language	/m/03_9r
/m/02rhwjr	/tv/tv_program/regular_cast./tv/regular_tv_appearance/actor	/m/01vs8ng
/m/03qd_	/film/actor/film./film/performance/film	/m/01738w
/m/0gz6b6g	/film/film/release_date_s./film/film_regional_release_date/film_release_region	/m/0f8l9c
/m/027tbrc	/tv/tv_program/regular_cast./tv/regular_tv_appearance/actor	/m/01vzxmq
/m/02qwg	/award/award_nominee/award_nominations./award/award_nomination/award_nominee	/m/01w724
/m/0jqn5	/award/award_winning_work/awards_won./award/award_honor/award_winner	/m/02ryx0
/m/0fb7c	/base/schemastaging/person_extra/net_worth./measurement_unit/dated_money_value/currency	/m/09nqf
/m/07s93v	/people/person/profession	/m/0cbd2
/m/07brj	/music/performance_role/track_performances./music/track_contribution/role	/m/0jtg0
/m/0gyv0b4	/award/award_winning_work/awards_won./award/award_honor/award_winner	/m/0kjrx
/m/064_8sq	/language/human_language/countries_spoken_in	/m/06sw9
/m/0bq2g	/celebrities/celebrity/celebrity_friends./celebrities/friendship/friend	/m/06pj8
/m/09th87	/sports/sports_league_draft/picks./sports/sports_league_draft_pick/school	/m/0jkhr
/m/010p3	/people/person/profession	/m/0dxtg
/m/03bzyn4	/film/film/produced_by	/m/070j61
/m/0275n3y	/award/award_ceremony/awards_presented./award/award_honor/honored_for	/m/08fn5b
/m/07c72	/tv/tv_program/regular_cast./tv/regular_tv_appearance/actor	/m/01h910
/m/048scx	/film/film/other_crew./film/film_crew_gig/crewmember	/m/0b79gfg
/m/0l14qv	/music/performance_role/track_performances./music/track_contribution/role	/m/0dwt5
/m/0ksy_	/soccer/football_team/current_roster./sports/sports_team_roster/position	/m/0dgrmp
/m/02c0mv	/people/person/gender	/m/05zppz
/m/0210hf	/award/award_winner/awards_won./award/award_honor/award_winner	/m/04qz6n
/m/04mp8x	/soccer/football_team/current_roster./soccer/football_roster_position/position	/m/02_j1w
/m/03_c8p	/base/schemastaging/organization_extra/phone_number./base/schemastaging/phone_sandbox/service_language	/m/03_9r
/m/0885n	/location/location/time_zones	/m/02hcv8
/m/03rgvr	/people/person/languages	/m/02h40lc
/m/048scx	/film/film/estimated_budget./measurement_unit/dated_money_value/currency	/m/09nqf
/m/05vtbl	/award/award_nominee/award_nominations./award/award_nomination/award_nominee	/m/0dbpyd
/m/03rk0	/location/country/official_language	/m/02h40lc
/m/03hj3b3	/film/film/music	/m/02ryx0
/m/0hptm	/location/location/time_zones	/m/02hcv8
/m/02h659	/business/business_operation/revenue./measurement_unit/dated_money_value/currency	/m/09nqf
/m/01xhh5	/people/ethnicity/geographic_distribution	/m/06f32
/m/011ysn	/film/film/genre	/m/07s9rl0
/m/064_8sq	/language/human_language/countries_spoken_in	/m/02kcz
/m/05nrkb	/education/educational_institution/students_graduates./education/education/student	/m/04bdqk
/m/0bq6ntw	/film/film/release_date_s./film/film_regional_release_date/film_release_region	/m/0b90_r
/m/0bq8tmw	/film/film/other_crew./film/film_crew_gig/film_crew_role	/m/09zzb8
/m/01kff7	/film/film/genre	/m/05p553
/m/01sby_	/film/film/release_date_s./film/film_regional_release_date/film_release_region	/m/06t2t
/m/03rjj	/location/statistical_region/gdp_real./measurement_unit/adjusted_money_value/adjustment_currency	/m/09nqf
/m/02glc4	/government/legislative_session/members./government/government_position_held/district_represented	/m/05k7sb
/m/0227tr	/film/actor/film./film/performance/film	/m/0473rc
/m/01d38g	/award/award_category/winners./award/award_honor/ceremony	/m/013b2h
/m/01lyv	/music/genre/artists	/m/013qvn
/m/02yvct	/film/film/other_crew./film/film_crew_gig/film_crew_role	/m/089fss
/m/04nl83	/film/film/country	/m/0f8l9c
/m/050yyb	/award/award_ceremony/awards_presented./award/award_honor/honored_for	/m/03xf_m
/m/0k_q_	/base/biblioness/bibs_location/state	/m/01n7q
/m/0401sg	/film/film/release_date_s./film/film_regional_release_date/film_release_region	/m/0h7x
/m/01_x6v	/people/person/languages	/m/02h40lc
/m/036jb	/people/person/spouse_s./people/marriage/type_of_union	/m/04ztj
/m/0lwkz	/base/aareas/schema/administrative_area/capital	/m/0jq27
/m/03xf_m	/film/film/other_crew./film/film_crew_gig/film_crew_role	/m/01pvkk
/m/0ft5vs	/american_football/football_team/current_roster./sports/sports_team_roster/position	/m/05zm34
/m/02xbyr	/film/film/estimated_budget./measurement_unit/dated_money_value/currency	/m/09nqf
/m/06chvn	/people/person/gender	/m/05zppz
/m/0pk1p	/film/film/written_by	/m/0h7pj
/m/0dhml	/location/capital_of_administrative_division/capital_of./location/administrative_division_capital_relationship/administrative_division	/m/0cc07
/m/0cj36c	/award/award_nominee/award_nominations./award/award_nomination/award_nominee	/m/0cl0bk
/m/0140t7	/award/award_nominee/award_nominations./award/award_nomination/award	/m/0gqz2
/m/01rr_d	/education/educational_degree/people_with_this_degree./education/education/student	/m/09xvf7
/m/0713r	/sports/professional_sports_team/draft_picks./sports/sports_league_draft_pick/school	/m/01jpqb
/m/01q415	/award/award_nominee/award_nominations./award/award_nomination/award	/m/0gr4k
/m/02ywhz	/award/award_ceremony/awards_presented./award/award_honor/award_winner	/m/06pj8
/m/02_xgp2	/education/educational_degree/people_with_this_degree./education/education/institution	/m/0dzst
/m/01swxv	/education/educational_institution/students_graduates./education/education/major_field_of_study	/m/02h40lc
/m/0djb3vw	/film/film/release_date_s./film/film_regional_release_date/film_release_region	/m/03rjj
/m/01bczm	/base/popstra/celebrity/canoodled./base/popstra/canoodled/participant	/m/05r5w
/m/02yvct	/film/film/release_date_s./film/film_regional_release_date/film_release_region	/m/0f8l9c
/m/02g75	/award/award_nominee/award_nominations./award/award_nomination/award	/m/0265vt
/m/02z3zp	/award/award_nominee/award_nominations./award/award_nomination/award_nominee	/m/0crx5w
/m/02vnp2	/business/business_operation/operating_income./measurement_unit/dated_money_value/currency	/m/09nqf
/m/01v1d8	/music/performance_role/guest_performances./music/recording_contribution/performance_role	/m/0l14qv
/m/09rp4r_	/people/person/place_of_birth	/m/0d6lp
/m/03kg2v	/film/film/other_crew./film/film_crew_gig/film_crew_role	/m/0ch6mp2
/m/01l_pn	/film/film/genre	/m/05p553
/m/01tz6vs	/people/person/languages	/m/06b_j
/m/0m66w	/award/award_nominee/award_nominations./award/award_nomination/award_nominee	/m/046b0s
/m/03cglm	/award/award_nominee/award_nominations./award/award_nomination/award_nominee	/m/06dv3
/m/0431v3	/award/award_winning_work/awards_won./award/award_honor/award_winner	/m/030hbp
/m/05h43ls	/award/award_winning_work/awards_won./award/award_honor/award_winner	/m/024rgt
/m/04mky3	/people/person/profession	/m/0n1h
/m/0g476	/award/award_nominee/award_nominations./award/award_nomination/award	/m/0gkvb7
/m/0d0vqn	/olympics/olympic_participating_country/medals_won./olympics/olympic_medal_honor/olympics	/m/0lbd9
/m/02qjj7	/base/popstra/celebrity/dated./base/popstra/dated/participant	/m/05r5w
/m/015v3r	/award/award_nominee/award_nominations./award/award_nomination/award	/m/0bs0bh
/m/05pdd86	/film/film/other_crew./film/film_crew_gig/film_crew_role	/m/09vw2b7
/m/02tvsn	/military/military_conflict/combatants./military/military_combatant_group/combatants	/m/01m41_
/m/014mlp	/education/educational_degree/people_with_this_degree./education/education/institution	/m/07wlf
/m/01snvb	/sports/sports_position/players./sports/sports_team_roster/team	/m/0ftf0f
/m/0fzrtf	/time/event/instance_of_recurring_event	/m/0g_w
/m/04s430	/base/saturdaynightlive/snl_cast_member/seasons./base/saturdaynightlive/snl_season_tenure/cast_members	/m/03q45x
/m/047p7fr	/film/film/genre	/m/07s9rl0
/m/02_j1w	/sports/sports_position/players./sports/sports_team_roster/team	/m/07_w1l
/m/0k419	/award/award_winning_work/awards_won./award/award_honor/award	/m/0gs96
/m/05r5w	/base/popstra/celebrity/friendship./base/popstra/friendship/participant	/m/0993r
/m/02ywhz	/award/award_ceremony/awards_presented./award/award_honor/honored_for	/m/0m313
/m/014g_s	/base/schemastaging/person_extra/net_worth./measurement_unit/dated_money_value/currency	/m/09nqf
/m/0bwfwpj	/film/film/release_date_s./film/film_regional_release_date/film_release_region	/m/01crd5
/m/06gb2q	/people/person/gender	/m/05zppz
/m/0qmhk	/film/film/music	/m/07zft
/m/06pj8	/base/popstra/celebrity/friendship./base/popstra/friendship/participant	/m/0gx_p
/m/0gr4k	/award/award_category/nominees./award/award_nomination/nominated_for	/m/0ccck7
/m/0ply0	/base/popstra/location/vacationers./base/popstra/vacation_choice/vacationer	/m/01d1st
/m/05p1tzf	/film/film/other_crew./film/film_crew_gig/film_crew_role	/m/02r96rf
/m/055sjw	/tv/tv_producer/programs_produced./tv/tv_producer_term/program	/m/01h72l
/m/02z0j	/travel/travel_destination/how_to_get_here./travel/transportation/mode_of_transportation	/m/01bjv
/m/0fpkhkz	/film/film/release_date_s./film/film_regional_release_date/film_release_region	/m/015fr
/m/035d1m	/olympics/olympic_sport/athletes./olympics/olympic_athlete_affiliation/country	/m/0f8l9c
/m/06q07	/base/schemastaging/organization_extra/phone_number./base/schemastaging/phone_sandbox/service_language	/m/064_8sq
/m/07l50vn	/film/film/release_date_s./film/film_regional_release_date/film_release_region	/m/05b4w
/m/0lp_cd3	/award/award_ceremony/awards_presented./award/award_honor/award_winner	/m/02kxwk
/m/05tk7y	/award/award_nominee/award_nominations./award/award_nomination/award_nominee	/m/020_95
/m/01k8vh	/sports/professional_sports_team/draft_picks./sports/sports_league_draft_pick/school	/m/01b1mj
/m/014mlp	/education/educational_degree/people_with_this_degree./education/education/institution	/m/03205_
/m/02l96k	/music/genre/artists	/m/044k8
/m/0gj9qxr	/film/film/other_crew./film/film_crew_gig/film_crew_role	/m/0ch6mp2
/m/03gkn5	/people/person/languages	/m/02h40lc
/m/04v8h1	/film/film/estimated_budget./measurement_unit/dated_money_value/currency	/m/09nqf
/m/0gjv_	/education/educational_institution/colors	/m/01g5v
/m/01vs4f3	/people/person/gender	/m/05zppz
/m/04j13sx	/film/film/language	/m/02h40lc
/m/0bp_b2	/award/award_category/winners./award/award_honor/ceremony	/m/03nnm4t
/m/07qg8v	/film/film/release_date_s./film/film_regional_release_date/film_release_region	/m/0f8l9c
/m/05hmp6	/award/award_ceremony/awards_presented./award/award_honor/award_winner	/m/01jpmpv
/m/01p7yb	/people/person/places_lived./people/place_lived/location	/m/0498y
/m/0h3y	/location/statistical_region/places_exported_to./location/imports_and_exports/exported_to	/m/015fr
/m/03bx2lk	/film/film/release_date_s./film/film_regional_release_date/film_release_region	/m/05qhw
/m/013b2h	/award/award_ceremony/awards_presented./award/award_honor/award_winner	/m/0hl3d
/m/026p_bs	/film/film/music	/m/023361
/m/0cwx_	/organization/non_profit_organization/registered_with./organization/non_profit_registration/registering_agency	/m/03z19
/m/057176	/award/award_nominee/award_nominations./award/award_nomination/award_nominee	/m/07swvb
/m/02p65p	/award/award_nominee/award_nominations./award/award_nomination/award_nominee	/m/0lkr7
/m/07s9rl0	/media_common/netflix_genre/titles	/m/0b2km_
/m/01w02sy	/people/person/profession	/m/0n1h
/m/0gffmn8	/film/film/release_date_s./film/film_regional_release_date/film_release_region	/m/05qhw
/m/0ndsl1x	/film/film/genre	/m/02l7c8
/m/0738b8	/award/award_nominee/award_nominations./award/award_nomination/award_nominee	/m/03q43g
/m/07tp2	/olympics/olympic_participating_country/medals_won./olympics/olympic_medal_honor/olympics	/m/06sks6
/m/0d1xh	/location/location/time_zones	/m/02fqwt
/m/02cg41	/time/event/instance_of_recurring_event	/m/0c4ys
/m/01r93l	/people/person/gender	/m/05zppz
/m/02_j1w	/sports/sports_position/players./sports/sports_team_roster/team	/m/04vn_k
/m/02p11jq	/music/record_label/artist	/m/015_30
/m/07l50vn	/film/film/release_date_s./film/film_regional_release_date/film_release_region	/m/016wzw
/m/012v9y	/film/actor/film./film/performance/film	/m/0h3k3f
/m/01vv6_6	/people/person/profession	/m/0nbcg
/m/01v5h	/award/award_nominee/award_nominations./award/award_nomination/nominated_for	/m/0k4kk
/m/02p2zq	/people/person/profession	/m/0nbcg
/m/0h953	/people/deceased_person/place_of_death	/m/030qb3t
/m/01n8gr	/people/person/spouse_s./people/marriage/type_of_union	/m/04ztj
/m/0466s8n	/film/film/film_format	/m/0cj16
/m/0b_6qj	/time/event/locations	/m/02cl1
/m/02pzc4	/award/award_winner/awards_won./award/award_honor/award_winner	/m/02pbrn
/m/0c1pj	/base/popstra/celebrity/friendship./base/popstra/friendship/participant	/m/06dv3
/m/069z_5	/people/person/spouse_s./people/marriage/type_of_union	/m/04ztj
/m/08966	/travel/travel_destination/climate./travel/travel_destination_monthly_climate/month	/m/02xx5
/m/027hm_	/people/person/gender	/m/05zppz
/m/063fh9	/film/film/featured_film_locations	/m/0ctw_b
/m/01ycfv	/award/award_nominee/award_nominations./award/award_nomination/award	/m/054krc
/m/0hsn_	/award/award_nominee/award_nominations./award/award_nomination/award	/m/09qwmm
/m/03wj4r8	/film/film/estimated_budget./measurement_unit/dated_money_value/currency	/m/09nqf
/m/0l786	/award/award_nominee/award_nominations./award/award_nomination/nominated_for	/m/0n04r
/m/03cw411	/film/film/release_date_s./film/film_regional_release_date/film_release_region	/m/03rjj
/m/045n3p	/people/person/gender	/m/05zppz
/m/011k1h	/music/record_label/artist	/m/01sxd1
/m/073hkh	/award/award_ceremony/awards_presented./award/award_honor/honored_for	/m/077q8x
/m/01rl_3	/soccer/football_team/current_roster./sports/sports_team_roster/position	/m/02_j1w
/m/0c1fs	/people/person/profession	/m/0dxtg
/m/0gr4k	/award/award_category/nominees./award/award_nomination/nominated_for	/m/0h3k3f
/m/0c6g1l	/people/person/places_lived./people/place_lived/location	/m/0d6lp
/m/073hkh	/time/event/instance_of_recurring_event	/m/0g_w
/m/02jkkv	/film/film/other_crew./film/film_crew_gig/film_crew_role	/m/02r96rf
/m/013b2h	/award/award_ceremony/awards_presented./award/award_honor/award_winner	/m/0cc5tgk
/m/0b13yt	/sports/sports_position/players./sports/sports_team_roster/team	/m/05g49
/m/03rjj	/olympics/olympic_participating_country/medals_won./olympics/olympic_medal_honor/olympics	/m/0sxrz
/m/037cr1	/film/film/language	/m/02h40lc
/m/0bqvs2	/film/actor/film./film/performance/film	/m/03l6q0
/m/0l14qv	/music/performance_role/regular_performances./music/group_membership/role	/m/0gkd1
/m/0gls4q_	/people/person/place_of_birth	/m/01sn3
/m/028tv0	/music/performance_role/regular_performances./music/group_membership/group	/m/04qmr
/m/03bx2lk	/film/film/edited_by	/m/04cy8rb
/m/09wj5	/award/award_nominee/award_nominations./award/award_nomination/award_nominee	/m/015t56
/m/03j76b	/soccer/football_team/current_roster./soccer/football_roster_position/position	/m/0dgrmp
/m/02_1sj	/film/film/language	/m/02h40lc
/m/01grrf	/government/legislative_session/members./government/government_position_held/district_represented	/m/05fjf
/m/06wbm8q	/film/film/other_crew./film/film_crew_gig/film_crew_role	/m/01vx2h
/m/01q_ph	/award/award_nominee/award_nominations./award/award_nomination/nominated_for	/m/0ndsl1x
/m/02yw0y	/music/genre/artists	/m/0889x
/m/0276jmv	/award/award_nominee/award_nominations./award/award_nomination/nominated_for	/m/0fhzwl
/m/0hyxv	/sports/sports_team_location/teams	/m/0j46b
/m/0h0yt	/award/award_winner/awards_won./award/award_honor/award_winner	/m/065jlv
/m/0bmssv	/film/film/estimated_budget./measurement_unit/dated_money_value/currency	/m/09nqf
/m/07zl1	/people/person/spouse_s./people/marriage/type_of_union	/m/04ztj
/m/0p7pw	/film/film/genre	/m/07s9rl0
/m/01cszh	/music/record_label/artist	/m/0394y
/m/03_b1g	/tv/tv_program/genre	/m/07s9rl0
/m/0c53vt	/award/award_ceremony/awards_presented./award/award_honor/honored_for	/m/0h3k3f
/m/02h4rq6	/education/educational_degree/people_with_this_degree./education/education/institution	/m/05q2c
/m/052hl	/award/award_nominee/award_nominations./award/award_nomination/award	/m/0gqz2
/m/025sc50	/music/genre/artists	/m/01vxlbm
/m/0661ql3	/film/film/release_date_s./film/film_regional_release_date/film_release_region	/m/06t2t
/m/0chgzm	/travel/travel_destination/climate./travel/travel_destination_monthly_climate/month	/m/028kb
/m/05zm34	/sports/sports_position/players./sports/sports_team_roster/team	/m/0ft5vs
/m/0gs96	/award/award_category/nominees./award/award_nomination/nominated_for	/m/0k419
/m/01vw917	/award/award_nominee/award_nominations./award/award_nomination/award_nominee	/m/0jdhp
/m/02h40lc	/language/human_language/countries_spoken_in	/m/03_xj
/m/04dn09n	/award/award_category/nominees./award/award_nomination/nominated_for	/m/0hmr4
/m/035dk	/olympics/olympic_participating_country/medals_won./olympics/olympic_medal_honor/olympics	/m/0lbd9
/m/02p2zq	/award/award_winner/awards_won./award/award_honor/award_winner	/m/014kyy
/m/01n8gr	/people/person/profession	/m/016z4k
/m/0661ql3	/film/film/other_crew./film/film_crew_gig/film_crew_role	/m/09zzb8
/m/07cw4	/award/award_winning_work/awards_won./award/award_honor/award	/m/02wkmx
/m/087pfc	/film/film/release_date_s./film/film_regional_release_date/film_release_region	/m/0154j
/m/0d0vqn	/location/location/contains	/m/07tcs
/m/0gz6b6g	/film/film/film_festivals	/m/0j63cyr
/m/01pg1d	/people/person/profession	/m/0dxtg
/m/09sb52	/award/award_category/winners./award/award_honor/award_winner	/m/03kbb8
/m/01c6k4	/base/schemastaging/organization_extra/phone_number./base/schemastaging/phone_sandbox/service_location	/m/0chghy
/m/012c6j	/people/deceased_person/place_of_death	/m/0k049
/m/03tdlh	/film/actor/film./film/performance/film	/m/0b4lkx
/m/01cpqk	/film/person_or_entity_appearing_in_film/films./film/personal_film_appearance/type_of_appearance	/m/01jdpf
/m/02kxjx	/military/military_conflict/combatants./military/military_combatant_group/combatants	/m/0ctw_b
/m/06zsk51	/tv/tv_program/languages	/m/02h40lc
/m/01p4vl	/base/popstra/celebrity/canoodled./base/popstra/canoodled/participant	/m/0227vl
/m/0gfh84d	/film/film/other_crew./film/film_crew_gig/film_crew_role	/m/02r96rf
/m/018n6m	/base/schemastaging/person_extra/net_worth./measurement_unit/dated_money_value/currency	/m/09nqf
/m/012v9y	/film/actor/film./film/performance/film	/m/04j13sx
/m/05lb65	/award/award_nominee/award_nominations./award/award_nomination/nominated_for	/m/03ln8b
/m/01cdt5	/medicine/symptom/symptom_of	/m/07jwr
/m/01pw9v	/people/person/gender	/m/05zppz
/m/0979zs	/music/performance_role/track_performances./music/track_contribution/role	/m/0gkd1
/m/036gdw	/people/person/place_of_birth	/m/0nbrp
/m/081pw	/military/military_conflict/combatants./military/military_combatant_group/combatants	/m/06c1y
/m/022dp5	/people/ethnicity/people	/m/01tvz5j
/m/0ddjy	/film/film/production_companies	/m/0kx4m
/m/07c2wt	/soccer/football_team/current_roster./soccer/football_roster_position/position	/m/0dgrmp
/m/01d38g	/award/award_category/category_of	/m/0c4ys
/m/01ry_x	/award/award_winning_work/awards_won./award/award_honor/award	/m/054krc
/m/018c_r	/base/schemastaging/organization_extra/phone_number./base/schemastaging/phone_sandbox/contact_category	/m/03w5xm
/m/01vvb4m	/base/popstra/celebrity/dated./base/popstra/dated/participant	/m/0kjrx
/m/0427y	/people/person/gender	/m/05zppz
/m/06l32y	/education/university/domestic_tuition./measurement_unit/dated_money_value/currency	/m/09nqf
/m/025sc50	/music/genre/artists	/m/02h9_l
/m/04n52p6	/film/film/release_date_s./film/film_regional_release_date/film_release_region	/m/0chghy
/m/063472	/people/person/spouse_s./people/marriage/type_of_union	/m/04ztj
/m/02g0mx	/people/person/place_of_birth	/m/030qb3t
/m/03gvt	/music/performance_role/guest_performances./music/recording_contribution/performance_role	/m/01qbl
/m/06w58f	/people/person/place_of_birth	/m/030qb3t
/m/05r5w	/base/popstra/celebrity/dated./base/popstra/dated/participant	/m/02qjj7
/m/0431v3	/tv/tv_program/genre	/m/05p553
/m/01_x6d	/people/person/religion	/m/0kq2
/m/02s5v5	/people/person/spouse_s./people/marriage/type_of_union	/m/04ztj
/m/0gqz2	/award/award_category/winners./award/award_honor/award_winner	/m/016jll
/m/014mlp	/education/educational_degree/people_with_this_degree./education/education/institution	/m/0217m9
/m/0k419	/film/film/country	/m/03rjj
/m/03y_46	/award/award_nominee/award_nominations./award/award_nomination/award	/m/09sb52
/m/0kv9d3	/award/award_winning_work/awards_won./award/award_honor/award	/m/054krc
/m/063t3j	/people/person/profession	/m/016z4k
/m/02ylg6	/film/film/other_crew./film/film_crew_gig/film_crew_role	/m/0215hd
/m/09z2b7	/film/film/genre	/m/07s9rl0
/m/04zl8	/film/film/release_date_s./film/film_regional_release_date/film_release_region	/m/0f8l9c
/m/04b5n0	/soccer/football_team/current_roster./sports/sports_team_roster/position	/m/0dgrmp
/m/023slg	/people/person/gender	/m/05zppz
/m/07rzf	/people/person/languages	/m/02h40lc
/m/06x77g	/award/award_winning_work/awards_won./award/award_honor/award_winner	/m/042l3v
/m/02yvct	/film/film/release_date_s./film/film_regional_release_date/film_release_region	/m/0ctw_b
/m/02dq8f	/education/educational_institution/students_graduates./education/education/student	/m/04wg38
/m/085pr	/award/award_nominee/award_nominations./award/award_nomination/nominated_for	/m/0p9tm
/m/01qrb2	/education/educational_institution/students_graduates./education/education/major_field_of_study	/m/02_7t
/m/02l7c8	/media_common/netflix_genre/titles	/m/06t2t2
/m/05cx7x	/award/award_nominee/award_nominations./award/award_nomination/award_nominee	/m/015t56
/m/01gsry	/government/legislative_session/members./government/government_position_held/legislative_sessions	/m/01gst9
/m/0l14md	/music/instrument/instrumentalists	/m/07zft
/m/0k269	/people/person/places_lived./people/place_lived/location	/m/030qb3t
/m/05qbckf	/film/film/personal_appearances./film/personal_film_appearance/person	/m/079vf
/m/015dqj	/award/award_nominee/award_nominations./award/award_nomination/nominated_for	/m/015qqg
/m/02k4b2	/film/actor/film./film/performance/film	/m/02xtxw
/m/024rbz	/film/film_distributor/films_distributed./film/film_film_distributor_relationship/film	/m/04q24zv
/m/0dcz8_	/film/film/other_crew./film/film_crew_gig/film_crew_role	/m/01pvkk
/m/0ynfz	/location/capital_of_administrative_division/capital_of./location/administrative_division_capital_relationship/administrative_division	/m/0n3dv
/m/05cl2w	/award/award_nominee/award_nominations./award/award_nomination/award_nominee	/m/06cgy
/m/0c422z4	/award/award_category/nominees./award/award_nomination/nominated_for	/m/0bq8tmw
/m/077q8x	/film/film/other_crew./film/film_crew_gig/film_crew_role	/m/0dxtw
/m/02bfmn	/award/award_nominee/award_nominations./award/award_nomination/award_nominee	/m/01ps2h8
/m/01385g	/people/person/gender	/m/05zppz
/m/03xkps	/people/person/spouse_s./people/marriage/type_of_union	/m/04ztj
/m/05bm4sm	/award/award_nominee/award_nominations./award/award_nomination/award_nominee	/m/0b6mgp_
/m/07l50vn	/film/film/release_date_s./film/film_regional_release_date/film_release_region	/m/06c1y
/m/02cllz	/people/person/gender	/m/05zppz
/m/01g3gq	/film/film/language	/m/064_8sq
/m/0kvbl6	/award/award_winning_work/awards_won./award/award_honor/award_winner	/m/0127m7
/m/02x258x	/award/award_category/nominees./award/award_nomination/nominated_for	/m/017gl1
/m/0nh57	/location/location/adjoin_s./location/adjoining_relationship/adjoins	/m/0ngy8
/m/0b4lkx	/award/award_winning_work/awards_won./award/award_honor/award_winner	/m/085pr
/m/049w1q	/film/film/release_date_s./film/film_regional_release_date/film_release_region	/m/0f8l9c
/m/0gffmn8	/film/film/release_date_s./film/film_regional_release_date/film_release_region	/m/0jgd
/m/032sl_	/film/film/other_crew./film/film_crew_gig/film_crew_role	/m/0ch6mp2
/m/02b168	/soccer/football_team/current_roster./sports/sports_team_roster/position	/m/0dgrmp
/m/0ctw_b	/location/statistical_region/places_exported_to./location/imports_and_exports/exported_to	/m/0chghy
/m/016tw3	/film/film_distributor/films_distributed./film/film_film_distributor_relationship/film	/m/0gyh2wm
/m/04hcw	/user/alexander/philosophy/philosopher/interests	/m/09xq9d
/m/05g8pg	/film/film/language	/m/02h40lc
/m/0l14qv	/music/performance_role/track_performances./music/track_contribution/role	/m/02g9p4
/m/01l_pn	/film/film/other_crew./film/film_crew_gig/film_crew_role	/m/09vw2b7
/m/0b7xl8	/award/award_nominee/award_nominations./award/award_nomination/award	/m/01lk0l
/m/06cgy	/award/award_nominee/award_nominations./award/award_nomination/award_nominee	/m/0b13g7
/m/06crng	/influence/influence_node/influenced_by	/m/01w524f
/m/0gy0l_	/film/film/other_crew./film/film_crew_gig/film_crew_role	/m/0ch6mp2
/m/0gzlb9	/film/film/other_crew./film/film_crew_gig/film_crew_role	/m/09vw2b7
/m/023g6w	/film/film/country	/m/0f8l9c
/m/0154qm	/award/award_winner/awards_won./award/award_honor/award_winner	/m/01ps2h8
/m/0mcf4	/music/record_label/artist	/m/01z9_x
/m/06cgy	/award/award_nominee/award_nominations./award/award_nomination/award_nominee	/m/01900g
/m/0b76t12	/film/film/film_festivals	/m/0cmd3zy
/m/06r713	/government/legislative_session/members./government/government_position_held/legislative_sessions	/m/07p__7
/m/01914	/travel/travel_destination/how_to_get_here./travel/transportation/mode_of_transportation	/m/01bjv
/m/01vttb9	/people/person/spouse_s./people/marriage/type_of_union	/m/04ztj
/m/017hnw	/organization/organization/headquarters./location/mailing_address/state_province_region	/m/05k7sb
/m/05g3b	/sports/professional_sports_team/draft_picks./sports/sports_league_draft_pick/draft	/m/02qw1zx
/m/0g3bw	/location/location/contains	/m/018jk2
/m/05m_8	/baseball/baseball_team/team_stats./baseball/baseball_team_stats/season	/m/026fmqm
/m/0b7l4x	/film/film/produced_by	/m/079vf
/m/0k1bs	/music/group_member/membership./music/group_membership/group	/m/0394y
/m/0377k9	/government/government_office_category/officeholders./government/government_position_held/jurisdiction_of_office	/m/035dk
/m/036hnm	/education/educational_institution/school_type	/m/01rs41
/m/0dgrmp	/sports/sports_position/players./sports/sports_team_roster/team	/m/03__77
/m/02_j1w	/sports/sports_position/players./sports/sports_team_roster/team	/m/0303jw
/m/0ylvj	/education/educational_institution/students_graduates./education/education/student	/m/041h0
/m/04kxsb	/award/award_category/nominees./award/award_nomination/nominated_for	/m/03xf_m
/m/01vksx	/film/film/release_date_s./film/film_regional_release_date/film_release_region	/m/03rjj
/m/03ylxn	/soccer/football_team/current_roster./sports/sports_team_roster/position	/m/0dgrmp
/m/03l6bs	/location/location/time_zones	/m/02fqwt
/m/02qwg	/award/award_nominee/award_nominations./award/award_nomination/award_nominee	/m/05crg7
/m/0gr4k	/award/award_category/nominees./award/award_nomination/nominated_for	/m/05ldxl
/m/02ppg1r	/tv/tv_program/regular_cast./tv/regular_tv_appearance/actor	/m/02wcx8c
/m/0b7xl8	/award/award_winner/awards_won./award/award_honor/award_winner	/m/05jjl
/m/084nh	/award/award_nominee/award_nominations./award/award_nomination/award	/m/0ddd9
/m/031k24	/award/award_nominee/award_nominations./award/award_nomination/award_nominee	/m/03k7bd
/m/017r2	/people/person/gender	/m/05zppz
/m/086xm	/education/educational_institution/students_graduates./education/education/student	/m/031k24
/m/02q8ms8	/film/film/film_festivals	/m/04grdgy
/m/06pj8	/award/award_nominee/award_nominations./award/award_nomination/nominated_for	/m/012mrr
/m/04hcw	/people/person/gender	/m/05zppz
/m/01r93l	/people/person/place_of_birth	/m/01llj3
/m/06ryl	/olympics/olympic_participating_country/athletes./olympics/olympic_athlete_affiliation/olympics	/m/06sks6
/m/0f4_l	/film/film/estimated_budget./measurement_unit/dated_money_value/currency	/m/09nqf
/m/0126rp	/film/actor/film./film/performance/film	/m/0407yj_
/m/0hfml	/people/person/gender	/m/05zppz
/m/09dt7	/award/award_nominee/award_nominations./award/award_nomination/award	/m/040vk98
/m/04n52p6	/film/film/release_date_s./film/film_regional_release_date/film_release_region	/m/015fr
/m/030hbp	/award/award_nominee/award_nominations./award/award_nomination/award	/m/0cqhk0
/m/0gy7bj4	/film/film/release_date_s./film/film_regional_release_date/film_regional_debut_venue	/m/018cvf
/m/05gqy	/base/aareas/schema/administrative_area/administrative_parent	/m/0166c7
/m/0p9tm	/award/award_winning_work/awards_won./award/award_honor/award	/m/040njc
/m/06f_qn	/people/person/gender	/m/05zppz
/m/05sq84	/people/person/gender	/m/05zppz
/m/0dgrmp	/sports/sports_position/players./sports/sports_team_roster/team	/m/01kckd
/m/026m9w	/award/award_category/winners./award/award_honor/award_winner	/m/01fkxr
/m/0d8cr0	/people/person/gender	/m/05zppz
/m/082brv	/people/person/profession	/m/01c72t
/m/01l9v7n	/award/award_nominee/award_nominations./award/award_nomination/nominated_for	/m/0cf08
/m/09v3jyg	/film/film/release_date_s./film/film_regional_release_date/film_release_region	/m/0154j
/m/07y8l9	/people/person/spouse_s./people/marriage/type_of_union	/m/04ztj
/m/0661m4p	/film/film/genre	/m/0556j8
/m/02qjj7	/base/popstra/celebrity/canoodled./base/popstra/canoodled/participant	/m/05r5w
/m/02qyntr	/award/award_category/nominees./award/award_nomination/nominated_for	/m/0k20s
/m/021yw7	/award/award_nominee/award_nominations./award/award_nomination/nominated_for	/m/019nnl
/m/030hbp	/people/person/place_of_birth	/m/06yxd
/m/07_3qd	/music/artist/track_contributions./music/track_contribution/role	/m/07brj
/m/02w_6xj	/award/award_category/winners./award/award_honor/award_winner	/m/0184jw
/m/06bzwt	/film/actor/film./film/performance/film	/m/047fjjr
/m/0gtvpkw	/film/film/release_date_s./film/film_regional_release_date/film_release_region	/m/0154j
/m/01b4p4	/music/genre/parent_genre	/m/0y3_8
/m/02bj22	/film/film/other_crew./film/film_crew_gig/film_crew_role	/m/02r96rf
/m/0gy6z9	/award/award_nominee/award_nominations./award/award_nomination/award_nominee	/m/02qgyv
/m/01r97z	/film/film/genre	/m/05p553
/m/01_lh1	/business/business_operation/revenue./measurement_unit/dated_money_value/currency	/m/09nqf
/m/07y2s	/base/schemastaging/organization_extra/phone_number./base/schemastaging/phone_sandbox/service_location	/m/02j9z
/m/08vk_r	/soccer/football_team/current_roster./sports/sports_team_roster/position	/m/02_j1w
/m/04zx08r	/award/award_category/winners./award/award_honor/award_winner	/m/01r_t_
/m/049468	/people/person/spouse_s./people/marriage/type_of_union	/m/04ztj
/m/0dgrmp	/sports/sports_position/players./sports/sports_team_roster/team	/m/013xh7
/m/0bby9p5	/film/film/release_date_s./film/film_regional_release_date/film_release_region	/m/0d0vqn
/m/0210hf	/award/award_nominee/award_nominations./award/award_nomination/nominated_for	/m/0b76kw1
/m/057wlm	/organization/organization/headquarters./location/mailing_address/citytown	/m/0gkgp
/m/011k1h	/music/record_label/artist	/m/01vw26l
/m/05qbckf	/film/film/release_date_s./film/film_regional_release_date/film_release_region	/m/030qb3t
/m/02z0j	/travel/travel_destination/climate./travel/travel_destination_monthly_climate/month	/m/028kb
/m/03nsm5x	/film/film/release_date_s./film/film_regional_release_date/film_release_region	/m/06t2t
/m/05d6q1	/film/film_distributor/films_distributed./film/film_film_distributor_relationship/film	/m/04jkpgv
/m/0bnzd	/film/film/genre	/m/09blyk
/m/0gwgn1k	/film/film/other_crew./film/film_crew_gig/film_crew_role	/m/09vw2b7
/m/047bynf	/film/film/other_crew./film/film_crew_gig/film_crew_role	/m/09zzb8
/m/017gl1	/film/film/costume_design_by	/m/02h1rt
/m/026mmy	/award/award_category/winners./award/award_honor/ceremony	/m/02cg41
/m/0ddd9	/award/award_category/winners./award/award_honor/award_winner	/m/07dnx
/m/0bx8pn	/education/educational_institution/students_graduates./education/education/student	/m/06yj20
/m/01vh08	/people/person/gender	/m/05zppz
/m/0431v3	/tv/tv_program/languages	/m/02h40lc
/m/03xq0f	/film/film_distributor/films_distributed./film/film_film_distributor_relationship/film	/m/02x6dqb
/m/0fx2s	/film/film_subject/films	/m/0k2m6
/m/0184dt	/award/award_nominee/award_nominations./award/award_nomination/award	/m/04dn09n
/m/03_dj	/people/person/profession	/m/0cbd2
/m/02bj22	/film/film/language	/m/02h40lc
/m/0ndsl1x	/film/film/release_date_s./film/film_regional_release_date/film_release_region	/m/06c1y
/m/076lxv	/people/person/profession	/m/089fss
/m/03djpm	/music/genre/artists	/m/01ww_vs
/m/01xlqd	/film/film/release_date_s./film/film_regional_release_date/film_release_region	/m/0f8l9c
/m/033rq	/award/award_nominee/award_nominations./award/award_nomination/award	/m/040njc
/m/05fnl9	/award/award_nominee/award_nominations./award/award_nomination/award_nominee	/m/0151w_
/m/0fpj9pm	/people/person/profession	/m/016z4k
/m/0l6qt	/people/person/profession	/m/0cbd2
/m/02q0k7v	/film/film/genre	/m/07s9rl0
/m/07l24	/sports/professional_sports_team/draft_picks./sports/sports_league_draft_pick/school	/m/01wdj_
/m/06z6r	/olympics/olympic_sport/athletes./olympics/olympic_athlete_affiliation/country	/m/02k1b
/m/04kxsb	/award/award_category/nominees./award/award_nomination/nominated_for	/m/09p7fh
/m/03f1d47	/film/actor/film./film/performance/film	/m/04g9gd
/m/0b_dy	/film/actor/film./film/performance/film	/m/0c_j9x
/m/01c6k4	/base/schemastaging/organization_extra/phone_number./base/schemastaging/phone_sandbox/service_location	/m/059g4
/m/04vh83	/film/film/other_crew./film/film_crew_gig/film_crew_role	/m/09zzb8
/m/025x1t	/tv/tv_program/languages	/m/02h40lc
/m/02rchht	/people/person/gender	/m/05zppz
/m/05m_8	/organization/organization/headquarters./location/mailing_address/state_province_region	/m/01n7q
/m/01jw4r	/people/person/spouse_s./people/marriage/type_of_union	/m/04ztj
/m/01qscs	/award/award_nominee/award_nominations./award/award_nomination/award_nominee	/m/02p65p
/m/0c7t58	/award/award_winner/awards_won./award/award_honor/award_winner	/m/0cp9f9
/m/09v3jyg	/film/film/release_date_s./film/film_regional_release_date/film_release_region	/m/0ctw_b
/m/07x4qr	/film/film/release_date_s./film/film_regional_release_date/film_release_region	/m/05qhw
/m/048vhl	/film/film/production_companies	/m/016tt2
/m/01j7z7	/film/actor/film./film/performance/film	/m/03f7nt
/m/02sfnv	/film/film/estimated_budget./measurement_unit/dated_money_value/currency	/m/09nqf
/m/087pfc	/film/film/language	/m/03_9r
/m/0154j	/location/location/adjoin_s./location/adjoining_relationship/adjoins	/m/0f8l9c
/m/084l5	/american_football/football_team/current_roster./sports/sports_team_roster/position	/m/04nfpk
/m/02dlh2	/music/performance_role/track_performances./music/track_contribution/role	/m/01xqw
/m/01tlmw	/location/statistical_region/rent50_2./measurement_unit/dated_money_value/currency	/m/09nqf
/m/05r3qc	/film/film/genre	/m/05p553
/m/054krc	/award/award_category/nominees./award/award_nomination/nominated_for	/m/0y_9q
/m/04rrx	/location/location/adjoin_s./location/adjoining_relationship/adjoins	/m/0824r
/m/0d0l91	/people/person/profession	/m/012t_z
/m/0gkd1	/music/performance_role/regular_performances./music/group_membership/role	/m/03gvt
/m/014mlp	/education/educational_degree/people_with_this_degree./education/education/institution	/m/01n4w_
/m/049gc	/people/person/profession	/m/0dxtg
/m/04h4c9	/film/film/music	/m/01x1fq
/m/05c26ss	/film/film/release_date_s./film/film_regional_release_date/film_release_region	/m/03gj2
/m/06x76	/sports/sports_team/roster./american_football/football_roster_position/position	/m/04nfpk
/m/0qjfl	/award/hall_of_fame/inductees./award/hall_of_fame_induction/inductee	/m/0f5xn
/m/083q7	/government/politician/government_positions_held./government/government_position_held/basic_title	/m/0fkvn
/m/013yq	/travel/travel_destination/how_to_get_here./travel/transportation/mode_of_transportation	/m/07jdr
/m/0gt3p	/people/person/gender	/m/05zppz
/m/02xp18	/people/person/profession	/m/0np9r
/m/02qyntr	/award/award_category/nominees./award/award_nomination/nominated_for	/m/027ct7c
/m/08nvyr	/film/film/language	/m/02h40lc
/m/02ct_k	/film/actor/film./film/performance/film	/m/02_fm2
/m/01bh6y	/film/actor/dubbing_performances./film/dubbing_performance/language	/m/02h40lc
/m/02g8mp	/award/award_category/winners./award/award_honor/ceremony	/m/01s695
/m/01jv_6	/sports/sports_team/roster./american_football/football_historical_roster_position/position_s	/m/04nfpk
/m/0bpm4yw	/film/film/other_crew./film/film_crew_gig/film_crew_role	/m/09vw2b7
/m/01n4w_	/education/educational_institution/students_graduates./education/education/student	/m/018zvb
/m/086sj	/award/award_nominee/award_nominations./award/award_nomination/nominated_for	/m/03bxp5
/m/06t2t2	/film/film/genre	/m/02l7c8
/m/02qk3fk	/film/film/release_date_s./film/film_regional_release_date/film_release_region	/m/05qhw
/m/02fybl	/film/actor/film./film/performance/film	/m/011ysn
/m/054ks3	/award/award_category/winners./award/award_honor/award_winner	/m/01vvycq
/m/01_k1z	/people/person/gender	/m/05zppz
/m/0ndsl1x	/film/film/release_date_s./film/film_regional_release_date/film_release_region	/m/016wzw
/m/02qwg	/award/award_nominee/award_nominations./award/award_nomination/award	/m/05zkcn5
/m/06x76	/american_football/football_team/current_roster./sports/sports_team_roster/position	/m/05zm34
/m/09w1n	/olympics/olympic_sport/athletes./olympics/olympic_athlete_affiliation/country	/m/0154j
/m/04wg38	/people/person/profession	/m/0dxtg
/m/0f_nbyh	/award/award_category/nominees./award/award_nomination/nominated_for	/m/05c46y6
/m/0mdqp	/people/person/profession	/m/0dxtg
/m/01vw26l	/people/person/places_lived./people/place_lived/location	/m/030qb3t
/m/02wk_43	/award/award_nominee/award_nominations./award/award_nomination/award_nominee	/m/03wh8kl
/m/0f67f	/base/biblioness/bibs_location/state	/m/04rrx
/m/03qnc6q	/film/film/release_date_s./film/film_regional_release_date/film_release_region	/m/05b4w
/m/017jd9	/film/film/release_date_s./film/film_regional_release_date/film_release_region	/m/0d05w3
/m/01grmk	/government/legislative_session/members./government/government_position_held/district_represented	/m/059f4
/m/01pw9v	/influence/influence_node/influenced_by	/m/03jxw
/m/01fx5l	/award/award_nominee/award_nominations./award/award_nomination/award_nominee	/m/07s8r0
/m/01hqhm	/film/film/estimated_budget./measurement_unit/dated_money_value/currency	/m/09nqf
/m/0147dk	/people/person/spouse_s./people/marriage/type_of_union	/m/04ztj
/m/07hwkr	/people/ethnicity/people	/m/01h320
/m/017z88	/education/educational_institution/students_graduates./education/education/student	/m/01v3vp
/m/0blbxk	/award/award_nominee/award_nominations./award/award_nomination/award_nominee	/m/05yh_t
/m/049nq	/location/location/contains	/m/0fqxw
/m/01qvgl	/award/award_nominee/award_nominations./award/award_nomination/award	/m/0gqz2
/m/0c5qvw	/film/film/language	/m/02h40lc
/m/02wcx8c	/award/award_nominee/award_nominations./award/award_nomination/award_nominee	/m/067sqt
/m/07ym0	/influence/influence_node/influenced_by	/m/081k8
/m/07yjb	/media_common/netflix_genre/titles	/m/076xkps
/m/0184jw	/people/person/languages	/m/02h40lc
/m/04g61	/military/military_combatant/military_conflicts./military/military_combatant_group/combatants	/m/0f8l9c
/m/014j1m	/food/food/nutrients./food/nutrition_fact/nutrient	/m/03d49
/m/025sc50	/music/genre/artists	/m/06s7rd
/m/02897w	/business/business_operation/operating_income./measurement_unit/dated_money_value/currency	/m/09nqf
/m/02r8hh_	/film/film/release_date_s./film/film_regional_release_date/film_release_region	/m/06f32
/m/0bkj86	/education/educational_degree/people_with_this_degree./education/education/institution	/m/07tgn
/m/02lm0t	/sports/pro_athlete/teams./sports/sports_team_roster/team	/m/0jmgb
/m/05zjtn4	/education/educational_institution/students_graduates./education/education/major_field_of_study	/m/0g26h
/m/04cbbz	/film/film/music	/m/023361
/m/0bq2g	/award/award_winner/awards_won./award/award_honor/award_winner	/m/0m31m
/m/02q3fdr	/film/film/executive_produced_by	/m/0534v
/m/09k34g	/soccer/football_team/current_roster./sports/sports_team_roster/position	/m/02_j1w
/m/071t0	/olympics/olympic_sport/athletes./olympics/olympic_athlete_affiliation/country	/m/047yc
/m/04q7r	/music/performance_role/track_performances./music/track_contribution/role	/m/0mkg
/m/0177gl	/soccer/football_team/current_roster./soccer/football_roster_position/position	/m/0dgrmp
/m/0315q3	/award/award_nominee/award_nominations./award/award_nomination/award_nominee	/m/02w29z
/m/01rzqj	/people/person/spouse_s./people/marriage/type_of_union	/m/04ztj
/m/030_3z	/people/person/gender	/m/05zppz
/m/0b7l4x	/film/film/other_crew./film/film_crew_gig/film_crew_role	/m/02y6fz
/m/04f9r2	/award/award_nominee/award_nominations./award/award_nomination/award	/m/054krc
/m/010p3	/people/person/profession	/m/08z956
/m/0c9d9	/people/person/nationality	/m/0f8l9c
/m/0gz6b6g	/film/film/distributors./film/film_film_distributor_relationship/region	/m/06m_5
/m/06m_5	/location/country/form_of_government	/m/01fpfn
/m/055sjw	/people/person/gender	/m/05zppz
/m/071t0	/olympics/olympic_sport/athletes./olympics/olympic_athlete_affiliation/country	/m/05b4w
/m/0gtv7pk	/film/film/release_date_s./film/film_regional_release_date/film_release_region	/m/04gzd
/m/02khs	/location/location/time_zones	/m/0gsrz4
/m/01pbwwl	/people/person/spouse_s./people/marriage/spouse	/m/0dx_q
/m/014mlp	/education/educational_degree/people_with_this_degree./education/education/institution	/m/05t7c1
/m/0gbwp	/music/artist/origin	/m/0281y0
/m/0l2tk	/education/university/local_tuition./measurement_unit/dated_money_value/currency	/m/09nqf
/m/030znt	/award/award_nominee/award_nominations./award/award_nomination/award	/m/0bfvw2
/m/013nv_	/location/location/time_zones	/m/02fqwt
/m/0169dl	/award/award_nominee/award_nominations./award/award_nomination/award_nominee	/m/02p65p
/m/0d0vqn	/base/popstra/location/vacationers./base/popstra/vacation_choice/vacationer	/m/018grr
/m/06mvq	/people/ethnicity/people	/m/017l4
/m/0cq806	/award/award_winning_work/awards_won./award/award_honor/award	/m/0gs96
/m/025sc50	/music/genre/artists	/m/01w9wwg
/m/01y665	/award/award_nominee/award_nominations./award/award_nomination/award	/m/09sb52
/m/0fx2s	/film/film_subject/films	/m/04vh83
/m/0mkg	/music/performance_role/regular_performances./music/group_membership/role	/m/085jw
/m/05css_	/film/film/genre	/m/0bkbm
/m/01xlqd	/film/film/release_date_s./film/film_regional_release_date/film_release_region	/m/0b90_r
/m/04vr_f	/film/film/language	/m/02h40lc
/m/08nhfc1	/film/film/other_crew./film/film_crew_gig/film_crew_role	/m/0ch6mp2
/m/0d4fqn	/award/award_nominee/award_nominations./award/award_nomination/award_nominee	/m/02wk_43
/m/05q_mg	/people/person/profession	/m/0dxtg
/m/01cwhp	/people/person/languages	/m/064_8sq
/m/01n4w_	/business/business_operation/revenue./measurement_unit/dated_money_value/currency	/m/09nqf
/m/0gy7bj4	/film/film/release_date_s./film/film_regional_release_date/film_release_region	/m/0ctw_b
/m/010dft	/location/hud_county_place/county	/m/0jc6p
/m/025sc50	/music/genre/artists	/m/01yzl2
/m/03vgp7	/people/person/profession	/m/0np9r
/m/012gx2	/people/person/gender	/m/05zppz
/m/0fpzt5	/award/award_nominee/award_nominations./award/award_nomination/award	/m/02662b
/m/06mm1x	/award/award_nominee/award_nominations./award/award_nomination/award_nominee	/m/03xpfzg
/m/03qlv7	/music/performance_role/track_performances./music/track_contribution/role	/m/07brj
/m/0j_tw	/film/film/featured_film_locations	/m/01n6r0
/m/01tspc6	/award/award_winner/awards_won./award/award_honor/award_winner	/m/0151w_
/m/02wwmhc	/film/film/other_crew./film/film_crew_gig/film_crew_role	/m/09vw2b7
/m/015c2f	/film/actor/film./film/performance/film	/m/05h43ls
/m/0f25w9	/food/food/nutrients./food/nutrition_fact/nutrient	/m/01n78x
/m/07ghv5	/film/film/genre	/m/0jxy
/m/02wwmhc	/film/film/story_by	/m/03qcq
/m/0cqt90	/base/popstra/celebrity/friendship./base/popstra/friendship/participant	/m/049_zz
/m/02r4qs	/people/person/places_lived./people/place_lived/location	/m/0wp9b
/m/01tw31	/music/group_member/membership./music/group_membership/role	/m/028tv0
/m/01wbz9	/people/person/gender	/m/05zppz
/m/084l5	/sports/sports_team/roster./american_football/football_roster_position/position	/m/05zm34
/m/016ks5	/film/film/genre	/m/02l7c8
/m/025ts_z	/film/film/release_date_s./film/film_regional_release_date/film_release_region	/m/03gj2
/m/07tlfx	/film/film/other_crew./film/film_crew_gig/film_crew_role	/m/0ch6mp2
/m/01pr_j6	/people/person/nationality	/m/03rk0
/m/04vn5	/american_football/football_team/current_roster./sports/sports_team_roster/position	/m/04nfpk
/m/02lf1j	/people/person/place_of_birth	/m/0d6lp
/m/04g61	/location/statistical_region/gdp_nominal./measurement_unit/dated_money_value/currency	/m/09nqf
/m/0h7x	/location/location/contains	/m/0fhnf
/m/018ctl	/olympics/olympic_games/participating_countries	/m/06npd
/m/02_xgp2	/education/educational_degree/people_with_this_degree./education/education/institution	/m/01y9pk
/m/03m79j_	/award/award_category/winners./award/award_honor/award_winner	/m/01qmy04
/m/01p79b	/education/educational_institution/colors	/m/0jc_p
/m/01v9l67	/film/actor/film./film/performance/film	/m/017gl1
/m/0bynt	/olympics/olympic_sport/athletes./olympics/olympic_athlete_affiliation/country	/m/0166v
/m/0bn8fw	/people/person/gender	/m/05zppz
/m/0jmhr	/sports/professional_sports_team/draft_picks./sports/sports_league_draft_pick/draft	/m/038c0q
/m/016tw3	/film/film_distributor/films_distributed./film/film_film_distributor_relationship/film	/m/0jz71
/m/06fcqw	/film/film/release_date_s./film/film_regional_release_date/film_release_region	/m/0h7x
/m/0sxrz	/time/event/locations	/m/0fydw
/m/0d2by	/people/ethnicity/people	/m/07ftc0
/m/05zvj3m	/award/award_category/nominees./award/award_nomination/nominated_for	/m/0bmssv
/m/021p26	/soccer/football_team/current_roster./soccer/football_roster_position/position	/m/02_j1w
/m/0h0yt	/influence/influence_node/influenced_by	/m/01hb6v
/m/03cz83	/education/university/fraternities_and_sororities	/m/04m8fy
/m/069z_5	/film/actor/film./film/performance/film	/m/063zky
/m/07g9f	/award/award_winning_work/awards_won./award/award_honor/award_winner	/m/0cjdk
/m/0bqdvt	/award/award_nominee/award_nominations./award/award_nomination/award	/m/09sb52
/m/0cwtm	/base/popstra/celebrity/friendship./base/popstra/friendship/participant	/m/01jw4r
/m/0275_pj	/award/award_winner/awards_won./award/award_honor/award_winner	/m/05qsxy
/m/03xnwz	/music/genre/artists	/m/01w524f
/m/0nhmw	/location/statistical_region/rent50_2./measurement_unit/dated_money_value/currency	/m/09nqf
/m/02rnns	/people/person/spouse_s./people/marriage/type_of_union	/m/04ztj
/m/063hp4	/award/award_winning_work/awards_won./award/award_honor/award_winner	/m/01vrlr4
/m/0ctw_b	/location/statistical_region/gdp_nominal_per_capita./measurement_unit/dated_money_value/currency	/m/09nqf
/m/01w_d6	/soccer/football_team/current_roster./soccer/football_roster_position/position	/m/02_j1w
/m/03xx9l	/people/person/profession	/m/0dxtg
/m/016tt2	/film/film_distributor/films_distributed./film/film_film_distributor_relationship/film	/m/0cq7tx
/m/03cvwkr	/film/film/produced_by	/m/0f5mdz
/m/029ghl	/people/person/spouse_s./people/marriage/spouse	/m/03xpsrx
/m/01nkt	/food/food/nutrients./food/nutrition_fact/nutrient	/m/025sf8g
/m/02z2xdf	/award/award_nominee/award_nominations./award/award_nomination/nominated_for	/m/0h1x5f
/m/0443xn	/people/person/spouse_s./people/marriage/location_of_ceremony	/m/03gh4
/m/0ksf29	/award/award_nominee/award_nominations./award/award_nomination/award	/m/0fdtd7
/m/09qj50	/award/award_category/winners./award/award_honor/ceremony	/m/03nnm4t
/m/04g5k	/location/statistical_region/gdp_nominal_per_capita./measurement_unit/dated_money_value/currency	/m/09nqf
/m/0cm2xh	/film/film_subject/films	/m/04h4c9
/m/03mkk4	/education/educational_degree/people_with_this_degree./education/education/institution	/m/01hhvg
/m/0bby9p5	/film/film/release_date_s./film/film_regional_release_date/film_release_region	/m/0ctw_b
/m/0l15bq	/music/performance_role/guest_performances./music/recording_contribution/performance_role	/m/02dlh2
/m/048vhl	/film/film/other_crew./film/film_crew_gig/film_crew_role	/m/02r96rf
/m/04q24zv	/film/film/other_crew./film/film_crew_gig/film_crew_role	/m/0ch6mp2
/m/0gkxgfq	/award/award_ceremony/awards_presented./award/award_honor/honored_for	/m/01b65l
/m/06f32	/military/military_combatant/military_conflicts./military/military_combatant_group/combatants	/m/07f1x
/m/01pv51	/sports/sports_position/players./sports/sports_team_roster/team	/m/0jmfv
/m/090s_0	/tv/tv_program/regular_cast./tv/regular_tv_appearance/actor	/m/019_1h
/m/06823p	/film/film/other_crew./film/film_crew_gig/film_crew_role	/m/0ch6mp2
/m/02y9ln	/sports/pro_athlete/teams./sports/sports_team_roster/team	/m/013xh7
/m/0fkvn	/government/government_office_category/officeholders./government/government_position_held/jurisdiction_of_office	/m/0846v
/m/05p09zm	/award/award_category/nominees./award/award_nomination/nominated_for	/m/06bd5j
/m/014v6f	/film/actor/film./film/performance/film	/m/0pc62
/m/0661ql3	/film/film/release_date_s./film/film_regional_release_date/film_release_region	/m/0h7x
/m/018c_r	/business/business_operation/operating_income./measurement_unit/dated_money_value/currency	/m/09nqf
/m/08nvyr	/film/film/film_format	/m/07fb8_
/m/048scx	/film/film/language	/m/02h40lc
/m/01wyz92	/award/award_nominee/award_nominations./award/award_nomination/award	/m/02f5qb
/m/020_4z	/people/person/profession	/m/0nbcg
/m/03gwpw2	/award/award_ceremony/awards_presented./award/award_honor/award_winner	/m/02kxbwx
/m/06hzq3	/music/genre/parent_genre	/m/017371
/m/04xg2f	/film/film/genre	/m/05p553
/m/03rtmz	/government/legislative_session/members./government/government_position_held/district_represented	/m/04rrx
/m/015t56	/award/award_nominee/award_nominations./award/award_nomination/award_nominee	/m/01p4vl
/m/04ztj	/people/marriage_union_type/unions_of_this_type./people/marriage/location_of_ceremony	/m/0174qm
/m/02v3yy	/award/award_nominee/award_nominations./award/award_nomination/award	/m/0gqz2
/m/026hxwx	/film/film/language	/m/02h40lc
/m/047fjjr	/film/film/country	/m/0d05w3
/m/0343h	/people/person/languages	/m/02h40lc
/m/01p7yb	/award/award_nominee/award_nominations./award/award_nomination/award	/m/02x4x18
/m/0dgrmp	/sports/sports_position/players./sports/sports_team_roster/team	/m/037mjv
/m/043n0v_	/film/film/genre	/m/03bxz7
/m/02ryyk	/soccer/football_team/current_roster./sports/sports_team_roster/position	/m/02_j1w
/m/0dgrmp	/sports/sports_position/players./sports/sports_team_roster/team	/m/03fhml
/m/01v1d8	/music/performance_role/regular_performances./music/group_membership/role	/m/0jtg0
/m/06msq2	/award/award_nominee/award_nominations./award/award_nomination/award_nominee	/m/01j7rd
/m/02b1b5	/soccer/football_team/current_roster./sports/sports_team_roster/position	/m/02_j1w
/m/027zz	/people/person/gender	/m/05zppz
/m/03phgz	/base/schemastaging/organization_extra/phone_number./base/schemastaging/phone_sandbox/contact_category	/m/03w5xm
/m/0gzlb9	/film/film/estimated_budget./measurement_unit/dated_money_value/currency	/m/09nqf
/m/05hjnw	/film/film/costume_design_by	/m/03gt0c5
/m/02bvt	/award/award_nominee/award_nominations./award/award_nomination/award_nominee	/m/04cl1
/m/01p79b	/education/university/local_tuition./measurement_unit/dated_money_value/currency	/m/09nqf
/m/06cp5	/music/genre/artists	/m/04qmr
/m/01vvb4m	/people/person/gender	/m/05zppz
/m/01wbl_r	/award/award_nominee/award_nominations./award/award_nomination/award_nominee	/m/01w9wwg
/m/0h32q	/people/person/sibling_s./people/sibling_relationship/sibling	/m/01fdc0
/m/019803	/film/actor/film./film/performance/film	/m/03h3x5
/m/03x31g	/people/person/places_lived./people/place_lived/location	/m/09c6w
/m/0420td	/soccer/football_team/current_roster./soccer/football_roster_position/position	/m/02_j1w
/m/02zcz3	/organization/endowed_organization/endowment./measurement_unit/dated_money_value/currency	/m/09nqf
/m/040z9	/film/actor/film./film/performance/film	/m/0prh7
/m/01qh7	/location/location/contains	/m/043q2z
/m/0292qb	/film/film/other_crew./film/film_crew_gig/crewmember	/m/0b6mgp_
/m/0ntxg	/location/location/contains	/m/0sgxg
/m/01vw20h	/people/person/places_lived./people/place_lived/location	/m/0f2v0
/m/02yxbc	/film/film/genre	/m/07s9rl0
/m/026dx	/film/director/film	/m/0qmd5
/m/04sx9_	/award/award_winner/awards_won./award/award_honor/award_winner	/m/04smkr
/m/08cn4_	/people/person/profession	/m/0np9r
/m/0l14md	/music/performance_role/regular_performances./music/group_membership/role	/m/0gkd1
/m/015c4g	/award/award_nominee/award_nominations./award/award_nomination/award	/m/05p09zm
/m/03qnc6q	/film/film/release_date_s./film/film_regional_release_date/film_release_region	/m/04hqz
/m/0d9jr	/location/location/contains	/m/0778p
/m/043djx	/government/legislative_session/members./government/government_position_held/district_represented	/m/05k7sb
/m/082brv	/music/artist/track_contributions./music/track_contribution/role	/m/02sgy
/m/09yhzs	/people/person/place_of_birth	/m/0qpqn
/m/0jmfv	/sports/sports_team/roster./basketball/basketball_roster_position/position	/m/02_ssl
/m/02h4rq6	/education/educational_degree/people_with_this_degree./education/education/institution	/m/02z6fs
/m/04p5cr	/tv/tv_program/genre	/m/0djd22
/m/06rf7	/location/location/adjoin_s./location/adjoining_relationship/adjoins	/m/03hrz
/m/04ztj	/people/marriage_union_type/unions_of_this_type./people/marriage/location_of_ceremony	/m/01wx74
/m/05znxx	/film/film/estimated_budget./measurement_unit/dated_money_value/currency	/m/09nqf
/m/07s9rl0	/media_common/netflix_genre/titles	/m/0bby9p5
/m/099bhp	/film/film/genre	/m/01zhp
/m/03q2t9	/people/person/spouse_s./people/marriage/type_of_union	/m/04ztj
/m/0661m4p	/film/film/genre	/m/05p553
/m/051cc	/people/person/place_of_birth	/m/013yq
/m/025m8y	/award/award_category/winners./award/award_honor/award_winner	/m/02fgpf
/m/0hn10	/media_common/netflix_genre/titles	/m/05_5rjx
/m/0885n	/education/educational_institution/students_graduates./education/education/major_field_of_study	/m/037mh8
/m/0c_j9x	/film/film/cinematography	/m/06qn87
/m/06ztvyx	/film/film/release_date_s./film/film_regional_release_date/film_release_region	/m/03rk0
/m/04gycf	/base/popstra/celebrity/friendship./base/popstra/friendship/participant	/m/0320jz
/m/07vqnc	/tv/tv_program/languages	/m/02h40lc
/m/01l_pn	/film/film/featured_film_locations	/m/03gh4
/m/0291hr	/film/film/production_companies	/m/016tt2
/m/01271h	/music/artist/track_contributions./music/track_contribution/role	/m/0gkd1
/m/07bx6	/film/film/other_crew./film/film_crew_gig/crewmember	/m/04ktcgn
/m/026dx	/award/award_nominee/award_nominations./award/award_nomination/award	/m/0gr4k
/m/011xg5	/award/award_winning_work/awards_won./award/award_honor/award_winner	/m/06pj8
/m/0993r	/award/award_nominee/award_nominations./award/award_nomination/award	/m/05p09zm
/m/02rzmzk	/people/person/gender	/m/05zppz
/m/03ldxq	/award/award_nominee/award_nominations./award/award_nomination/award_nominee	/m/02qssrm
/m/06dn58	/award/award_nominee/award_nominations./award/award_nomination/nominated_for	/m/05p9_ql
/m/01nkt	/food/food/nutrients./food/nutrition_fact/nutrient	/m/01n78x
/m/06czxq	/people/person/profession	/m/0np9r
/m/0169dl	/award/award_nominee/award_nominations./award/award_nomination/award_nominee	/m/01r93l
/m/031sg0	/base/popstra/celebrity/breakup./base/popstra/breakup/participant	/m/0l786
/m/015qqg	/award/award_winning_work/awards_won./award/award_honor/award_winner	/m/01tcf7
/m/0kbf1	/film/film/production_companies	/m/016tt2
/m/025sc50	/music/genre/artists	/m/016ppr
/m/019vsw	/education/educational_institution/students_graduates./education/education/student	/m/0219q
/m/0bh8yn3	/film/film/other_crew./film/film_crew_gig/film_crew_role	/m/09vw2b7
/m/050r1z	/film/film/estimated_budget./measurement_unit/dated_money_value/currency	/m/09nqf
/m/0m313	/award/award_winning_work/awards_won./award/award_honor/award_winner	/m/0m31m
/m/0cqhb3	/award/award_category/winners./award/award_honor/ceremony	/m/09qvms
/m/02p65p	/award/award_winner/awards_won./award/award_honor/award_winner	/m/03vgp7
/m/052bw	/location/location/contains	/m/0lbfv
/m/02x0fs9	/film/film/other_crew./film/film_crew_gig/film_crew_role	/m/0215hd
/m/0bp_b2	/award/award_category/nominees./award/award_nomination/nominated_for	/m/03kq98
/m/0gs96	/award/award_category/winners./award/award_honor/award_winner	/m/0d07j8
/m/03rjj	/olympics/olympic_participating_country/athletes./olympics/olympic_athlete_affiliation/olympics	/m/0sxrz
/m/0mdqp	/people/person/profession	/m/0np9r
/m/05sy_5	/film/film/other_crew./film/film_crew_gig/film_crew_role	/m/09vw2b7
/m/02x4x18	/award/award_category/winners./award/award_honor/award_winner	/m/019f2f
/m/016tt2	/film/film_distributor/films_distributed./film/film_film_distributor_relationship/film	/m/02bqxb
/m/02kxbwx	/film/director/film	/m/011yhm
/m/07j87	/food/food/nutrients./food/nutrition_fact/nutrient	/m/025sf0_
/m/0h0yt	/film/actor/film./film/performance/film	/m/011ywj
/m/02_j1w	/sports/sports_position/players./sports/sports_team_roster/team	/m/03m6zs
/m/02_j1w	/sports/sports_position/players./sports/sports_team_roster/team	/m/0544vh
/m/024dzn	/award/award_category/winners./award/award_honor/award_winner	/m/01d4cb
/m/0pnf3	/award/award_nominee/award_nominations./award/award_nomination/award_nominee	/m/02p65p
/m/02_1sj	/film/film/other_crew./film/film_crew_gig/film_crew_role	/m/09vw2b7
/m/067nsm	/award/award_nominee/award_nominations./award/award_nomination/award_nominee	/m/01wmxfs
/m/014mlp	/education/educational_degree/people_with_this_degree./education/education/student	/m/01t6b4
/m/04cw0j	/award/award_nominee/award_nominations./award/award_nomination/award_nominee	/m/03m9c8
/m/0dq3c	/business/job_title/people_with_this_title./business/employment_tenure/company	/m/0168nq
/m/017jd9	/film/film/release_date_s./film/film_regional_release_date/film_release_region	/m/03rk0
/m/0gkxgfq	/award/award_ceremony/awards_presented./award/award_honor/award_winner	/m/03ldxq
/m/039zft	/film/film/genre	/m/07s9rl0
/m/01l4g5	/people/person/profession	/m/01c72t
/m/01vw20h	/award/award_nominee/award_nominations./award/award_nomination/award_nominee	/m/05mxw33
/m/0bs5k8r	/film/film/language	/m/02h40lc
/m/0661m4p	/film/film/other_crew./film/film_crew_gig/film_crew_role	/m/02r96rf
/m/02d02	/sports/sports_team/roster./baseball/baseball_roster_position/position	/m/028c_8
/m/017gl1	/film/film/release_date_s./film/film_regional_release_date/film_release_region	/m/0f8l9c
/m/011yqc	/film/film/film_format	/m/0cj16
/m/0277j40	/film/film/estimated_budget./measurement_unit/dated_money_value/currency	/m/09nqf
/m/07hwkr	/people/ethnicity/people	/m/0197tq
/m/03f7nt	/award/award_nominated_work/award_nominations./award/award_nomination/nominated_for	/m/03xf_m
/m/09v478h	/award/award_category/winners./award/award_honor/award_winner	/m/02lnhv
/m/07hyk	/people/person/spouse_s./people/marriage/type_of_union	/m/04ztj
/m/01wdj_	/education/educational_institution/students_graduates./education/education/major_field_of_study	/m/01tbp
/m/0d6_s	/film/film/music	/m/089kpp
/m/05p1tzf	/film/film/release_date_s./film/film_regional_release_date/film_release_region	/m/07ylj
/m/0dzc16	/base/schemastaging/person_extra/net_worth./measurement_unit/dated_money_value/currency	/m/09nqf
/m/0h1m9	/film/actor/film./film/performance/film	/m/0bj25
/m/02xbyr	/film/film/release_date_s./film/film_regional_release_date/film_release_region	/m/06c1y
/m/01pcq3	/film/actor/dubbing_performances./film/dubbing_performance/language	/m/02h40lc
/m/015pvh	/award/award_nominee/award_nominations./award/award_nomination/award	/m/09sb52
/m/018417	/award/award_nominee/award_nominations./award/award_nomination/award_nominee	/m/05kh_
/m/03xq0f	/film/film_distributor/films_distributed./film/film_film_distributor_relationship/film	/m/03h3x5
/m/0259r0	/music/artist/origin	/m/01n7q
/m/030hcs	/film/actor/film./film/performance/film	/m/0czyxs
/m/0dmtp	/base/schemastaging/organization_extra/phone_number./base/schemastaging/phone_sandbox/service_language	/m/02h40lc
/m/059dn	/user/ktrueman/default_domain/international_organization/member_states	/m/04g5k
/m/030qb3t	/base/popstra/location/vacationers./base/popstra/vacation_choice/vacationer	/m/01xyt7
/m/071ywj	/film/actor/film./film/performance/film	/m/0ggbhy7
/m/0150t6	/award/award_nominee/award_nominations./award/award_nomination/nominated_for	/m/0661ql3
/m/05m_8	/sports/sports_team/roster./baseball/baseball_roster_position/position	/m/01z9v6
/m/011yxy	/film/film/cinematography	/m/05dppk
/m/0l14md	/music/performance_role/regular_performances./music/group_membership/role	/m/02dlh2
/m/0flw6	/people/person/sibling_s./people/sibling_relationship/sibling	/m/03xkps
/m/0b85mm	/film/film/release_date_s./film/film_regional_release_date/film_release_region	/m/082fr
/m/027tbrc	/tv/tv_program/regular_cast./tv/regular_tv_appearance/actor	/m/02k6rq
/m/0h63gl9	/film/film/release_date_s./film/film_regional_release_date/film_release_region	/m/07f1x
/m/0flddp	/award/award_nominee/award_nominations./award/award_nomination/nominated_for	/m/0kbf1
/m/0166b	/location/country/form_of_government	/m/06cx9
/m/037mjv	/soccer/football_team/current_roster./soccer/football_roster_position/position	/m/02_j1w
/m/04sry	/award/award_nominee/award_nominations./award/award_nomination/nominated_for	/m/019vhk
/m/01gz9n	/people/person/gender	/m/05zppz
/m/071t0	/olympics/olympic_sport/athletes./olympics/olympic_athlete_affiliation/country	/m/07ylj
/m/02k_kn	/music/genre/artists	/m/02qwg
/m/03q5dr	/award/award_nominee/award_nominations./award/award_nomination/award	/m/09sb52
/m/05lb30	/award/award_winner/awards_won./award/award_honor/award_winner	/m/030znt
/m/05pzdk	/award/award_winner/awards_won./award/award_honor/award_winner	/m/05bnq3j
/m/0c1jh	/influence/influence_node/influenced_by	/m/084nh
/m/0hqly	/people/person/profession	/m/0dxtg
/m/02_j1w	/sports/sports_position/players./sports/sports_team_roster/team	/m/05z01
/m/02825nf	/film/film/release_date_s./film/film_regional_release_date/film_release_region	/m/05qhw
/m/041rx	/people/ethnicity/people	/m/025vry
/m/0jf1b	/people/person/profession	/m/0dxtg
/m/04mp75	/sports/sports_team/colors	/m/019sc
/m/0g2c8	/award/hall_of_fame/inductees./award/hall_of_fame_induction/inductee	/m/01zlh5
/m/02_j1w	/sports/sports_position/players./sports/sports_team_roster/team	/m/0kz4w
/m/0kx4m	/award/award_winner/awards_won./award/award_honor/award_winner	/m/030_3z
/m/016nff	/award/award_nominee/award_nominations./award/award_nomination/award	/m/05zvq6g
/m/02825kb	/film/film/language	/m/03_9r
/m/0gl02yg	/film/film/release_date_s./film/film_regional_release_date/film_release_region	/m/06f32
/m/04hwbq	/film/film/release_date_s./film/film_regional_release_date/film_release_region	/m/0h7x
/m/03ckfl9	/music/genre/artists	/m/01k3qj
/m/09qwmm	/award/award_category/nominees./award/award_nomination/nominated_for	/m/0bnzd
/m/03bx2lk	/film/film/release_date_s./film/film_regional_release_date/film_release_region	/m/06npd
/m/02xbw2	/people/person/spouse_s./people/marriage/type_of_union	/m/04ztj
/m/0gs5q	/award/award_nominee/award_nominations./award/award_nomination/nominated_for	/m/01b195
/m/017dtf	/tv/tv_program/genre	/m/05p553
/m/02p65p	/award/award_nominee/award_nominations./award/award_nomination/award_nominee	/m/07s8r0
/m/0l14j_	/music/instrument/instrumentalists	/m/02b25y
/m/09wj5	/award/award_winner/awards_won./award/award_honor/award_winner	/m/01rh0w
/m/0b6k___	/award/award_category/winners./award/award_honor/award_winner	/m/015npr
/m/0y3_8	/music/genre/artists	/m/01fchy
/m/034q3l	/award/award_nominee/award_nominations./award/award_nomination/nominated_for	/m/0b4lkx
/m/02t_zq	/award/award_nominee/award_nominations./award/award_nomination/nominated_for	/m/05jyb2
/m/0577d	/location/location/time_zones	/m/02llzg
/m/07jqjx	/film/film/genre	/m/07s9rl0
/m/01qmy04	/award/award_nominee/award_nominations./award/award_nomination/award	/m/02681vq
/m/02ln1	/influence/influence_node/influenced_by	/m/0372p
/m/0151w_	/film/actor/film./film/performance/film	/m/0pc62
/m/047myg9	/film/film/other_crew./film/film_crew_gig/film_crew_role	/m/02r96rf
/m/0133h8	/location/location/adjoin_s./location/adjoining_relationship/adjoins	/m/0fhp9
/m/02gkzs	/government/legislative_session/members./government/government_position_held/district_represented	/m/05fjf
/m/04vr_f	/film/film/other_crew./film/film_crew_gig/film_crew_role	/m/0dxtw
/m/03r1pr	/award/award_nominee/award_nominations./award/award_nomination/award_nominee	/m/027rwmr
/m/0gtxj2q	/film/film/other_crew./film/film_crew_gig/film_crew_role	/m/0ch6mp2
/m/03rwz3	/film/film_distributor/films_distributed./film/film_film_distributor_relationship/film	/m/0fqt1ns
/m/0k269	/film/actor/film./film/performance/film	/m/047p7fr
/m/029h45	/people/person/profession	/m/0dxtg
/m/0dgrmp	/sports/sports_position/players./sports/sports_team_roster/team	/m/037css
/m/05pdh86	/film/film/release_date_s./film/film_regional_release_date/film_release_region	/m/047yc
/m/04zx08r	/award/award_category/nominees./award/award_nomination/nominated_for	/m/01sby_
/m/0275n3y	/award/award_ceremony/awards_presented./award/award_honor/honored_for	/m/04vr_f
/m/019pm_	/base/popstra/celebrity/friendship./base/popstra/friendship/participant	/m/0h7pj
/m/0fhzwl	/award/award_winning_work/awards_won./award/award_honor/award_winner	/m/0276jmv
/m/012v9y	/award/award_nominee/award_nominations./award/award_nomination/award	/m/04kxsb
/m/01n7q	/location/location/contains	/m/0kvt9
/m/01b195	/film/film/genre	/m/07s9rl0
/m/0d0vqn	/organization/organization_member/member_of./organization/organization_membership/organization	/m/02jxk
/m/0jmmn	/sports/sports_team/sport	/m/018w8
/m/0g96wd	/people/ethnicity/languages_spoken	/m/03x42
/m/05k17c	/organization/role/leaders./organization/leadership/organization	/m/04_j5s
/m/06npd	/location/location/adjoin_s./location/adjoining_relationship/adjoins	/m/05qhw
/m/03_dj	/people/person/spouse_s./people/marriage/type_of_union	/m/04ztj
/m/0h3mh3q	/tv/tv_program/regular_cast./tv/regular_tv_appearance/actor	/m/0hsn_
/m/040z9	/award/award_nominee/award_nominations./award/award_nomination/award	/m/0789_m
/m/03xzxb	/soccer/football_team/current_roster./sports/sports_team_roster/position	/m/0dgrmp
/m/02gm9n	/award/award_category/winners./award/award_honor/ceremony	/m/09n4nb
/m/01ydtg	/music/genre/artists	/m/0lccn
/m/0jpn8	/education/university/local_tuition./measurement_unit/dated_money_value/currency	/m/09nqf
/m/04vn5	/sports/professional_sports_team/draft_picks./sports/sports_league_draft_pick/draft	/m/09l0x9
/m/02gm9n	/award/award_category/winners./award/award_honor/ceremony	/m/019bk0
/m/0jt3qpk	/award/award_ceremony/awards_presented./award/award_honor/honored_for	/m/0cwrr
/m/01v_pj6	/award/award_nominee/award_nominations./award/award_nomination/award	/m/02f777
/m/0myk8	/music/performance_role/regular_performances./music/group_membership/role	/m/011_6p
/m/0fxmbn	/film/film/country	/m/014tss
/m/0rd6b	/location/location/time_zones	/m/02hcv8
/m/01963w	/award/award_nominee/award_nominations./award/award_nomination/award	/m/0262x6
/m/03vhvp	/award/award_nominee/award_nominations./award/award_nomination/award	/m/01ckcd
/m/05_5_22	/film/film/other_crew./film/film_crew_gig/film_crew_role	/m/09vw2b7
/m/0sxrz	/user/jg/default_domain/olympic_games/sports	/m/0486tv
/m/085jw	/music/performance_role/track_performances./music/track_contribution/role	/m/01vdm0
/m/0gkr9q	/award/award_category/winners./award/award_honor/award_winner	/m/0g69lg
/m/014gf8	/award/award_nominee/award_nominations./award/award_nomination/nominated_for	/m/01dyvs
/m/0bdjd	/film/film/estimated_budget./measurement_unit/dated_money_value/currency	/m/09nqf
/m/03rhqg	/music/record_label/artist	/m/01w7nwm
/m/0l14j_	/music/performance_role/track_performances./music/track_contribution/role	/m/0l15bq
/m/0bx6zs	/time/event/instance_of_recurring_event	/m/0gcf2r
/m/0dbxy	/people/ethnicity/people	/m/016kkx
/m/0m31m	/award/award_nominee/award_nominations./award/award_nomination/award_nominee	/m/03t0k1
/m/0bkj86	/education/educational_degree/people_with_this_degree./education/education/institution	/m/01y17m
/m/05y7hc	/people/person/gender	/m/05zppz
/m/0266bd5	/soccer/football_team/current_roster./soccer/football_roster_position/position	/m/0dgrmp
/m/01vy_v8	/film/actor/film./film/performance/film	/m/0ddjy
/m/05pxnmb	/film/film/estimated_budget./measurement_unit/dated_money_value/currency	/m/09nqf
/m/01wf86y	/people/person/profession	/m/0nbcg
/m/04sh80	/film/film/produced_by	/m/030vmc
/m/0bq2g	/award/award_nominee/award_nominations./award/award_nomination/award	/m/09sb52
/m/029q_y	/base/popstra/celebrity/friendship./base/popstra/friendship/participant	/m/03zqc1
/m/02xbyr	/film/film/release_date_s./film/film_regional_release_date/film_release_region	/m/06t2t
/m/09qvc0	/award/award_category/winners./award/award_honor/award_winner	/m/0pnf3
/m/036hf4	/film/actor/film./film/performance/film	/m/048tv9
/m/060j8b	/base/popstra/celebrity/dated./base/popstra/dated/participant	/m/072bb1
/m/03rwz3	/film/film_distributor/films_distributed./film/film_film_distributor_relationship/film	/m/08rr3p
/m/08hsww	/award/award_nominee/award_nominations./award/award_nomination/award_nominee	/m/04t2l2
/m/02wd48	/people/person/spouse_s./people/marriage/type_of_union	/m/04ztj
/m/0ggbhy7	/film/film/other_crew./film/film_crew_gig/film_crew_role	/m/02r96rf
/m/013pk3	/people/person/profession	/m/0np9r
/m/01j7rd	/award/award_nominee/award_nominations./award/award_nomination/award_nominee	/m/01xdf5
/m/063hp4	/film/film/cinematography	/m/02rybfn
/m/01w7nwm	/music/artist/track_contributions./music/track_contribution/role	/m/0l15bq
/m/04yj5z	/people/person/profession	/m/0np9r
/m/03rhqg	/music/record_label/artist	/m/01wmgrf
/m/0y_pg	/film/film/language	/m/02h40lc
/m/0lccn	/award/award_nominee/award_nominations./award/award_nomination/award_nominee	/m/02qtywd
/m/02rky4	/education/educational_institution/school_type	/m/01rs41
/m/01qg7c	/film/director/film	/m/0277j40
/m/02fgdx	/base/schemastaging/organization_extra/phone_number./base/schemastaging/phone_sandbox/contact_category	/m/03w5xm
/m/02j9z	/base/locations/continents/countries_within	/m/0h7x
/m/02s2lg	/base/x2010fifaworldcupsouthafrica/world_cup_squad/current_world_cup_squad./base/x2010fifaworldcupsouthafrica/current_world_cup_squad/current_club	/m/01cwm1
/m/0cwx_	/organization/endowed_organization/endowment./measurement_unit/dated_money_value/currency	/m/09nqf
/m/01zg98	/award/award_nominee/award_nominations./award/award_nomination/award_nominee	/m/0crvfq
/m/0fpkhkz	/film/film/film_format	/m/0cj16
/m/01clyr	/music/record_label/artist	/m/0144l1
/m/013b2h	/award/award_ceremony/awards_presented./award/award_honor/award_winner	/m/01wyz92
/m/043t1s	/soccer/football_team/current_roster./sports/sports_team_roster/position	/m/0dgrmp
/m/0c8tkt	/film/film/production_companies	/m/016tw3
/m/04913k	/sports/sports_team/roster./baseball/baseball_roster_position/position	/m/02lyr4
/m/01h6pn	/military/military_conflict/combatants./military/military_combatant_group/combatants	/m/02psqkz
/m/057pq5	/soccer/football_team/current_roster./sports/sports_team_roster/position	/m/0dgrmp
/m/0flw6	/film/actor/film./film/performance/film	/m/08nhfc1
/m/08hp53	/tv/tv_writer/tv_programs./tv/tv_program_writer_relationship/tv_program	/m/09kn9
/m/01vv6_6	/people/person/spouse_s./people/marriage/location_of_ceremony	/m/03gh4
/m/018x3	/people/person/gender	/m/05zppz
/m/02f72n	/award/award_category/winners./award/award_honor/award_winner	/m/014_lq
/m/0bj25	/award/award_winning_work/awards_won./award/award_honor/award	/m/0gs96
/m/047sxrj	/award/award_nominee/award_nominations./award/award_nomination/award_nominee	/m/067nsm
/m/0166v	/location/statistical_region/gdp_nominal_per_capita./measurement_unit/dated_money_value/currency	/m/09nqf
/m/05t7c1	/education/educational_institution/students_graduates./education/education/major_field_of_study	/m/037mh8
/m/0126rp	/influence/influence_node/influenced_by	/m/01wp_jm
/m/03l6bs	/education/university/local_tuition./measurement_unit/dated_money_value/currency	/m/09nqf
/m/0320jz	/people/person/spouse_s./people/marriage/type_of_union	/m/04ztj
/m/01w5gg6	/people/person/profession	/m/08z956
/m/0135xb	/people/person/places_lived./people/place_lived/location	/m/0619_
/m/02p65p	/award/award_winner/awards_won./award/award_honor/award_winner	/m/0b_dy
/m/01q4qv	/award/award_nominee/award_nominations./award/award_nomination/nominated_for	/m/0k20s
/m/09w1n	/olympics/olympic_sport/athletes./olympics/olympic_athlete_affiliation/country	/m/06npd
/m/05l0j5	/award/award_nominee/award_nominations./award/award_nomination/award_nominee	/m/08hsww
/m/0c02jh8	/soccer/football_team/current_roster./sports/sports_team_roster/position	/m/0dgrmp
/m/01cmp9	/film/film/language	/m/02h40lc
/m/019z7q	/influence/influence_node/influenced_by	/m/01pq5j7
/m/03xq0f	/film/film_distributor/films_distributed./film/film_film_distributor_relationship/film	/m/0czyxs
/m/06dv3	/base/popstra/celebrity/friendship./base/popstra/friendship/participant	/m/0c1pj
/m/0bx6zs	/award/award_ceremony/awards_presented./award/award_honor/honored_for	/m/0330r
/m/03rhqg	/music/record_label/artist	/m/02vgh
/m/0gvvf4j	/film/film/release_date_s./film/film_regional_release_date/film_release_region	/m/0d0vqn
/m/0ms1n	/location/location/time_zones	/m/02fqwt
/m/01vvycq	/award/award_nominee/award_nominations./award/award_nomination/award	/m/01cw51
/m/02qdymm	/people/person/gender	/m/05zppz
/m/04y79_n	/award/award_nominee/award_nominations./award/award_nomination/award_nominee	/m/06w2yp9
/m/026mx4	/location/administrative_division/country	/m/03rk0
/m/0mdqp	/award/award_nominee/award_nominations./award/award_nomination/award	/m/09qvc0
/m/01d8l	/olympics/olympic_participating_country/medals_won./olympics/olympic_medal_honor/olympics	/m/018ljb
/m/01fs__	/tv/tv_program/genre	/m/0c4xc
/m/03rk0	/location/location/contains	/m/01j922
/m/0j0pf	/influence/influence_node/influenced_by	/m/014ps4
/m/041rx	/people/ethnicity/people	/m/012bk
/m/06w92	/location/location/time_zones	/m/02llzg
/m/06k02	/people/person/spouse_s./people/marriage/type_of_union	/m/04ztj
/m/02rdxsh	/award/award_category/nominees./award/award_nomination/nominated_for	/m/0_b9f
/m/021q2j	/education/educational_institution/school_type	/m/01rs41
/m/0cc97st	/film/film/release_date_s./film/film_regional_release_date/film_release_region	/m/0jgd
/m/01vw20h	/award/award_nominee/award_nominations./award/award_nomination/award_nominee	/m/0126y2
/m/06f32	/military/military_combatant/military_conflicts./military/military_combatant_group/combatants	/m/06qd3
/m/0bykpk	/film/film/music	/m/02sj1x
/m/0db94w	/film/film/release_date_s./film/film_regional_release_date/film_release_region	/m/016wzw
/m/02rky4	/education/university/local_tuition./measurement_unit/dated_money_value/currency	/m/09nqf
/m/01p4vl	/people/person/place_of_birth	/m/0t0n5
/m/0p_pd	/award/award_nominee/award_nominations./award/award_nomination/award	/m/04kxsb
/m/01vd7hn	/award/award_winner/awards_won./award/award_honor/award_winner	/m/01m15br
/m/0d3k14	/people/person/places_lived./people/place_lived/location	/m/05k7sb
/m/0344gc	/film/film/language	/m/02h40lc
/m/014mlp	/education/educational_degree/people_with_this_degree./education/education/institution	/m/06bw5
/m/0pc62	/film/film/language	/m/064_8sq
/m/09w1n	/olympics/olympic_sport/athletes./olympics/olympic_athlete_affiliation/country	/m/04g5k
/m/04jjy	/film/film_subject/films	/m/0b7l4x
/m/069vt	/business/business_operation/industry	/m/0vg8
/m/048scx	/film/film/language	/m/06b_j
/m/0gvx_	/award/award_category/nominees./award/award_nomination/nominated_for	/m/072hx4
/m/041rx	/people/ethnicity/people	/m/01p6xx
/m/0xnvg	/people/ethnicity/people	/m/0315q3
/m/0262zm	/award/award_category/winners./award/award_honor/award_winner	/m/0c3kw
/m/037mh8	/people/person/gender	/m/05zppz
/m/01ffx4	/film/film/release_date_s./film/film_regional_release_date/film_release_region	/m/03gj2
/m/04nfpk	/sports/sports_position/players./sports/sports_team_roster/team	/m/0289q
/m/03rjj	/location/location/contains	/m/01ngn3
/m/04snp2	/people/person/profession	/m/0196pc
/m/0cqt41	/sports/professional_sports_team/draft_picks./sports/sports_league_draft_pick/draft	/m/02x2khw
/m/0n5fl	/location/location/time_zones	/m/02hcv8
/m/015lhm	/people/person/profession	/m/0dxtg
/m/09qvc0	/award/award_category/winners./award/award_honor/award_winner	/m/052hl
/m/0l14md	/music/performance_role/regular_performances./music/group_membership/group	/m/0dw4g
/m/09sb52	/award/award_category/winners./award/award_honor/award_winner	/m/01kwsg
/m/02sgy	/music/performance_role/track_performances./music/track_contribution/role	/m/05842k
/m/01vnt4	/music/performance_role/track_performances./music/track_contribution/role	/m/0l14j_
/m/05z_kps	/film/film/release_date_s./film/film_regional_release_date/film_release_region	/m/05qhw
/m/079vf	/people/person/spouse_s./people/marriage/type_of_union	/m/04ztj
/m/06v36	/olympics/olympic_participating_country/athletes./olympics/olympic_athlete_affiliation/olympics	/m/06sks6
/m/0dgrmp	/sports/sports_position/players./sports/sports_team_roster/team	/m/02qjb_
/m/0fphgb	/film/film/other_crew./film/film_crew_gig/film_crew_role	/m/09vw2b7
/m/0lbbj	/olympics/olympic_games/sports	/m/0486tv
/m/05b4w	/military/military_combatant/military_conflicts./military/military_combatant_group/combatants	/m/0b90_r
/m/0dl5d	/music/genre/artists	/m/02whj
/m/0473q	/people/person/gender	/m/05zppz
[truncated: 1,352 more rows]
