# Supplementary material
Source: ML conference proceedings conference paper supplement (https://proceedings.neurips.cc/paper_files/paper/2021/hash/0fd600c953cde8121262e322ef09f70e-Abstract.html)
Supplement: Supplementary file 1 [file 0fd600c953cde8121262e322ef09f70e-Supplemental.zip › Supplementary_Material_Paper_8745/data/GraIL-BM_nell_v1/test/test-fact.txt]

concept:televisionstation:wqec	concept:subpartof	concept:company:pbs
concept:televisionstation:kusm	concept:agentbelongstoorganization	concept:company:pbs
concept:televisionstation:kqsd_tv	concept:agentcollaborateswithagent	concept:company:pbs
concept:company:pbs	concept:agentcontrols	concept:televisionstation:kufm_tv
concept:company:pbs	concept:acquired	concept:company:kues
concept:company:pbs	concept:agentcontrols	concept:televisionstation:kyne_tv
concept:company:pbs	concept:agentcontrols	concept:televisionstation:kcos_tv
concept:televisionstation:wxxi_tv	concept:agentbelongstoorganization	concept:company:pbs
concept:televisionstation:wvta	concept:subpartof	concept:company:pbs
concept:televisionstation:wunp_tv	concept:agentcollaborateswithagent	concept:company:pbs
concept:televisionstation:koac_tv	concept:agentbelongstoorganization	concept:company:pbs
concept:televisionstation:wsec	concept:subpartof	concept:company:pbs
concept:televisionstation:wvta	concept:agentbelongstoorganization	concept:company:pbs
concept:televisionstation:kepb_tv	concept:agentbelongstoorganization	concept:company:pbs
concept:televisionstation:wedn	concept:subpartof	concept:company:pbs
concept:televisionstation:wunf_tv	concept:agentbelongstoorganization	concept:company:pbs
concept:televisionstation:ktwu	concept:agentbelongstoorganization	concept:company:pbs
concept:televisionstation:kood	concept:televisionstationaffiliatedwith	concept:televisionnetwork:pbs
concept:televisionstation:wvut	concept:subpartof	concept:company:pbs
concept:televisionstation:kfts	concept:subpartof	concept:company:pbs
concept:televisionstation:wunm_tv	concept:agentcollaborateswithagent	concept:company:pbs
concept:televisionstation:whla_tv	concept:televisionstationaffiliatedwith	concept:televisionnetwork:pbs
concept:televisionstation:whtj	concept:agentbelongstoorganization	concept:company:pbs
concept:company:pbs	concept:agentcontrols	concept:televisionstation:wmed_tv
concept:televisionstation:kpsd_tv	concept:subpartof	concept:company:pbs
concept:televisionstation:wkyu_tv	concept:agentcollaborateswithagent	concept:company:pbs
concept:televisionstation:wkon	concept:agentcollaborateswithagent	concept:company:pbs
concept:televisionstation:kuid_tv	concept:subpartof	concept:company:pbs
concept:televisionstation:ktsd_tv	concept:agentcollaborateswithagent	concept:company:pbs
concept:televisionstation:wgiq	concept:agentcollaborateswithagent	concept:company:pbs
concept:televisionstation:wlef_tv	concept:subpartof	concept:company:pbs
concept:televisionstation:whro_tv	concept:subpartof	concept:company:pbs
concept:televisionstation:wung_tv	concept:subpartoforganization	concept:televisionnetwork:pbs
concept:televisionstation:wkoh	concept:agentbelongstoorganization	concept:company:pbs
concept:televisionstation:wetp_tv	concept:agentbelongstoorganization	concept:company:pbs
concept:televisionstation:wfiq	concept:agentcollaborateswithagent	concept:company:pbs
concept:televisionstation:kopb_tv	concept:subpartof	concept:company:pbs
concept:televisionstation:wfiq	concept:agentbelongstoorganization	concept:company:pbs
concept:televisionstation:wmpt	concept:subpartof	concept:company:pbs
concept:televisionstation:kbyu_tv	concept:agentcollaborateswithagent	concept:company:pbs
concept:televisionstation:wmeb_tv	concept:subpartof	concept:company:pbs
concept:company:pbs	concept:agentcontrols	concept:televisionstation:krma_tv
concept:televisionstation:wntv	concept:agentbelongstoorganization	concept:company:pbs
concept:televisionstation:ktsc_tv	concept:subpartoforganization	concept:televisionnetwork:pbs
concept:televisionstation:wmae_tv	concept:televisionstationaffiliatedwith	concept:televisionnetwork:pbs
concept:televisionstation:wbcc_tv	concept:agentbelongstoorganization	concept:company:pbs
concept:televisionstation:kcet	concept:televisionstationaffiliatedwith	concept:televisionnetwork:pbs
concept:televisionstation:kwse	concept:agentbelongstoorganization	concept:company:pbs
concept:televisionstation:ktci_tv	concept:agentbelongstoorganization	concept:company:pbs
concept:televisionstation:wmae_tv	concept:agentcollaborateswithagent	concept:company:pbs
concept:televisionstation:wunj_tv	concept:televisionstationaffiliatedwith	concept:televisionnetwork:pbs
concept:televisionstation:kufm_tv	concept:agentbelongstoorganization	concept:company:pbs
concept:televisionstation:kufm_tv	concept:subpartoforganization	concept:televisionnetwork:pbs
concept:televisionstation:wpbt	concept:subpartof	concept:company:pbs
concept:televisionstation:whmc	concept:subpartoforganization	concept:televisionnetwork:pbs
concept:company:pbs	concept:agentcontrols	concept:televisionstation:kcts_tv
concept:televisionstation:whtj	concept:subpartoforganization	concept:televisionnetwork:pbs
concept:company:pbs	concept:agentcontrols	concept:televisionstation:wlpb_tv
concept:televisionstation:wkno_tv	concept:agentbelongstoorganization	concept:company:pbs
concept:televisionstation:ktsd_tv	concept:agentbelongstoorganization	concept:company:pbs
concept:televisionstation:wviz_tv	concept:agentbelongstoorganization	concept:company:pbs
concept:company:pbs	concept:agentcontrols	concept:televisionstation:wgvu_tv
concept:company:pbs	concept:agentcontrols	concept:televisionstation:wbiq_tv
concept:company:pbs	concept:agentcontrols	concept:televisionstation:woub_tv
concept:televisionstation:wenh	concept:televisionstationaffiliatedwith	concept:televisionnetwork:pbs
concept:televisionstation:kbyu_tv	concept:subpartof	concept:company:pbs
concept:televisionstation:wunm_tv	concept:agentbelongstoorganization	concept:company:pbs
concept:televisionstation:klru	concept:televisionstationaffiliatedwith	concept:televisionnetwork:pbs
concept:televisionstation:wgby_tv	concept:subpartof	concept:company:pbs
concept:company:pbs	concept:agentcontrols	concept:televisionstation:wdse_tv
concept:company:pbs	concept:agentcontrols	concept:televisionstation:wmpt
concept:televisionstation:kacv_tv	concept:subpartof	concept:company:pbs
concept:televisionstation:kaet	concept:subpartof	concept:company:pbs
concept:televisionstation:ketc	concept:agentcollaborateswithagent	concept:company:pbs
concept:televisionstation:kbhe_tv	concept:subpartof	concept:company:pbs
concept:televisionstation:kwse	concept:televisionstationaffiliatedwith	concept:televisionnetwork:pbs
concept:televisionstation:krwg_tv	concept:subpartof	concept:company:pbs
concept:televisionstation:weta_tv	concept:subpartof	concept:company:pbs
concept:company:pbs	concept:agentcontrols	concept:televisionstation:kisu_tv
concept:televisionstation:wfwa	concept:subpartof	concept:company:pbs
concept:televisionstation:weta_tv	concept:televisionstationaffiliatedwith	concept:televisionnetwork:pbs
concept:televisionstation:kcwc_tv	concept:subpartof	concept:company:pbs
concept:televisionstation:ktne_tv	concept:televisionstationaffiliatedwith	concept:televisionnetwork:pbs
concept:company:pbs	concept:agentcontrols	concept:televisionstation:wmsy_tv
concept:company:pbs	concept:agentcontrols	concept:televisionstation:kopb_tv
concept:televisionstation:wund_tv	concept:subpartof	concept:company:pbs
concept:company:pbs	concept:agentcontrols	concept:televisionstation:kamu_tv
concept:company:pbs	concept:agentcontrols	concept:televisionstation:wkzt_tv
concept:company:pbs	concept:agentcontrols	concept:televisionstation:wpby_tv
concept:televisionstation:kedt	concept:televisionstationaffiliatedwith	concept:televisionnetwork:pbs
concept:televisionstation:ketg	concept:subpartof	concept:company:pbs
concept:televisionstation:whro_tv	concept:agentcollaborateswithagent	concept:company:pbs
concept:televisionstation:wneo	concept:agentcollaborateswithagent	concept:company:pbs
concept:televisionstation:wpbt	concept:subpartoforganization	concept:televisionnetwork:pbs
concept:televisionstation:kcwc_tv	concept:agentbelongstoorganization	concept:company:pbs
concept:televisionstation:kopb_tv	concept:televisionstationaffiliatedwith	concept:televisionnetwork:pbs
concept:televisionstation:wlrn_tv	concept:agentcollaborateswithagent	concept:company:pbs
concept:televisionstation:weta_tv	concept:agentcollaborateswithagent	concept:company:pbs
concept:televisionstation:kera_tv	concept:agentbelongstoorganization	concept:company:pbs
concept:company:pbs	concept:agentcontrols	concept:televisionstation:wkha
