# Supplementary material
Source: ML conference proceedings conference paper supplement (https://proceedings.neurips.cc/paper_files/paper/2021/hash/0fd600c953cde8121262e322ef09f70e-Abstract.html)
Supplement: Supplementary file 1 [file 0fd600c953cde8121262e322ef09f70e-Supplemental.zip › Supplementary_Material_Paper_8745/data/GraIL-BM_nell_v1/test/test-random-sample/test9.txt]

concept:televisionstation:wqec	concept:subpartof	concept:company:pbs	1
concept:televisionstation:kltm_tv	concept:subpartof	concept:televisionstation:wvpy	0
concept:televisionstation:kusm	concept:agentbelongstoorganization	concept:company:pbs	1
concept:televisionstation:wvpy	concept:subpartof	concept:company:pbs	0
concept:televisionstation:kqsd_tv	concept:agentcollaborateswithagent	concept:company:pbs	1
concept:televisionstation:wfiq	concept:subpartof	concept:televisionstation:ktwu	0
concept:company:pbs	concept:agentcontrols	concept:televisionstation:kufm_tv	1
concept:televisionstation:whla_tv	concept:agentbelongstoorganization	concept:televisionstation:krma_tv	0
concept:company:pbs	concept:acquired	concept:company:kues	1
concept:televisionstation:wgcu_tv	concept:televisionstationaffiliatedwith	concept:televisionstation:krma_tv	0
concept:company:pbs	concept:agentcontrols	concept:televisionstation:kyne_tv	1
concept:televisionstation:kfts	concept:acquired	concept:televisionstation:wmau_tv	0
concept:company:pbs	concept:agentcontrols	concept:televisionstation:kcos_tv	1
concept:televisionstation:knpb_tv	concept:subpartof	concept:televisionstation:wsiu_tv	0
concept:televisionstation:wxxi_tv	concept:agentbelongstoorganization	concept:company:pbs	1
concept:televisionstation:wlrn_tv	concept:organizationterminatedperson	concept:televisionstation:krcb	0
concept:televisionstation:wvta	concept:subpartof	concept:company:pbs	1
concept:televisionstation:whla_tv	concept:subpartoforganization	concept:televisionstation:wnit_tv	0
concept:televisionstation:wunp_tv	concept:agentcollaborateswithagent	concept:company:pbs	1
concept:televisionstation:wosu_tv	concept:acquired	concept:televisionstation:wvut	0
concept:televisionstation:koac_tv	concept:agentbelongstoorganization	concept:company:pbs	1
concept:televisionstation:kuid_tv	concept:headquarteredin	concept:televisionstation:witf_tv	0
concept:televisionstation:wsec	concept:subpartof	concept:company:pbs	1
concept:televisionstation:wneo	concept:agentcollaborateswithagent	concept:academicfield:media	0
concept:televisionstation:wvta	concept:agentbelongstoorganization	concept:company:pbs	1
concept:televisionstation:wunf_tv	concept:organizationhiredperson	concept:televisionstation:kcge_dt	0
concept:televisionstation:kepb_tv	concept:agentbelongstoorganization	concept:company:pbs	1
concept:televisionstation:wlvt_tv	concept:agentcontrols	concept:televisionstation:weiq_tv	0
concept:televisionstation:wedn	concept:subpartof	concept:company:pbs	1
concept:televisionstation:wlpb_tv	concept:agentcontrols	concept:televisionstation:kcos_tv	0
concept:televisionstation:wunf_tv	concept:agentbelongstoorganization	concept:company:pbs	1
concept:televisionstation:kbyu_tv	concept:agentcontrols	concept:televisionstation:kyve_tv	0
concept:televisionstation:ktwu	concept:agentbelongstoorganization	concept:company:pbs	1
concept:personus:pat_mitchell	concept:agentbelongstoorganization	concept:televisionstation:ktsd_tv	0
concept:televisionstation:kood	concept:televisionstationaffiliatedwith	concept:televisionnetwork:pbs	1
concept:televisionstation:wedn	concept:topmemberoforganization	concept:televisionstation:wpto	0
concept:televisionstation:wvut	concept:subpartof	concept:company:pbs	1
concept:televisionstation:wtiu_tv	concept:televisionstationaffiliatedwith	concept:televisionstation:wbiq_tv	0
concept:televisionstation:kfts	concept:subpartof	concept:company:pbs	1
concept:journalist:gwen_ifill	concept:organizationterminatedperson	concept:company:kues	0
concept:televisionstation:wunm_tv	concept:agentcollaborateswithagent	concept:company:pbs	1
concept:academicfield:news	concept:organizationterminatedperson	concept:televisionstation:kbhe_tv	0
concept:televisionstation:whla_tv	concept:televisionstationaffiliatedwith	concept:televisionnetwork:pbs	1
concept:televisionstation:wkle	concept:organizationhiredperson	concept:televisionstation:wljt_tv	0
concept:televisionstation:whtj	concept:agentbelongstoorganization	concept:company:pbs	1
concept:televisionstation:wpto	concept:agentcollaborateswithagent	concept:televisionstation:wkha	0
concept:company:pbs	concept:agentcontrols	concept:televisionstation:wmed_tv	1
concept:televisionstation:kuat_tv	concept:companyeconomicsector	concept:televisionstation:krma_tv	0
concept:televisionstation:kpsd_tv	concept:subpartof	concept:company:pbs	1
concept:academicfield:media	concept:organizationhiredperson	concept:televisionstation:wlae_tv	0
concept:televisionstation:wkyu_tv	concept:agentcollaborateswithagent	concept:company:pbs	1
concept:televisionstation:wkpi	concept:companyeconomicsector	concept:televisionstation:wlef_tv	0
concept:televisionstation:wkon	concept:agentcollaborateswithagent	concept:company:pbs	1
concept:televisionstation:wsec	concept:agentcollaborateswithagent	concept:televisionstation:wedn	0
concept:televisionstation:kuid_tv	concept:subpartof	concept:company:pbs	1
concept:televisionstation:wpbt	concept:acquired	concept:televisionstation:wqec	0
concept:televisionstation:ktsd_tv	concept:agentcollaborateswithagent	concept:company:pbs	1
concept:televisionstation:wvpy	concept:organizationhiredperson	concept:televisionstation:kfts	0
concept:televisionstation:wgiq	concept:agentcollaborateswithagent	concept:company:pbs	1
concept:televisionstation:kera_tv	concept:agentcontrols	concept:televisionstation:wlvt_tv	0
concept:televisionstation:wlef_tv	concept:subpartof	concept:company:pbs	1
concept:televisionstation:wkle	concept:worksfor	concept:televisionstation:ketc	0
concept:televisionstation:whro_tv	concept:subpartof	concept:company:pbs	1
concept:televisionstation:wvta	concept:agentcontrols	concept:televisionstation:wmfe_tv	0
concept:televisionstation:wung_tv	concept:subpartoforganization	concept:televisionnetwork:pbs	1
concept:televisionstation:krsc_tv	concept:topmemberoforganization	concept:televisionstation:wcet	0
concept:televisionstation:wkoh	concept:agentbelongstoorganization	concept:company:pbs	1
concept:televisionstation:kbdi_tv	concept:organizationheadquarteredincity	concept:televisionstation:klru	0
concept:televisionstation:wetp_tv	concept:agentbelongstoorganization	concept:company:pbs	1
concept:televisionstation:ktci_tv	concept:organizationheadquarteredincity	concept:televisionstation:wdse_tv	0
concept:televisionstation:wfiq	concept:agentcollaborateswithagent	concept:company:pbs	1
concept:televisionstation:wkno_tv	concept:organizationterminatedperson	concept:televisionstation:wlvt_tv	0
concept:televisionstation:kopb_tv	concept:subpartof	concept:company:pbs	1
concept:televisionstation:kopb_tv	concept:worksfor	concept:company:kues	0
concept:televisionstation:wfiq	concept:agentbelongstoorganization	concept:company:pbs	1
concept:televisionstation:kacv_tv	concept:acquired	concept:televisionstation:krsc_tv	0
concept:televisionstation:wmpt	concept:subpartof	concept:company:pbs	1
concept:televisionstation:wcet	concept:organizationterminatedperson	concept:televisionstation:wqec	0
concept:televisionstation:kbyu_tv	concept:agentcollaborateswithagent	concept:company:pbs	1
concept:televisionstation:wunu	concept:worksfor	concept:televisionstation:whla_tv	0
concept:televisionstation:wmeb_tv	concept:subpartof	concept:company:pbs	1
concept:televisionstation:kuas_tv	concept:televisionstationaffiliatedwith	concept:televisionstation:kmbh_tv	0
concept:company:pbs	concept:agentcontrols	concept:televisionstation:krma_tv	1
concept:televisionstation:wxel_tv	concept:companyeconomicsector	concept:televisionstation:kuas_tv	0
concept:televisionstation:wntv	concept:agentbelongstoorganization	concept:company:pbs	1
concept:televisionstation:ktsc_tv	concept:organizationterminatedperson	concept:televisionstation:kdin_tv	0
concept:televisionstation:ktsc_tv	concept:subpartoforganization	concept:televisionnetwork:pbs	1
concept:televisionstation:wrja_tv	concept:agentcontrols	concept:televisionstation:wkmj_tv	0
concept:televisionstation:wmae_tv	concept:televisionstationaffiliatedwith	concept:televisionnetwork:pbs	1
concept:televisionstation:wedn	concept:subpartoforganization	concept:televisionstation:wkas	0
concept:televisionstation:wbcc_tv	concept:agentbelongstoorganization	concept:company:pbs	1
concept:televisionstation:wkoh	concept:subpartof	concept:televisionstation:kbyu_tv	0
concept:televisionstation:kcet	concept:televisionstationaffiliatedwith	concept:televisionnetwork:pbs	1
concept:televisionstation:wmed_tv	concept:topmemberoforganization	concept:televisionstation:kxne_tv	0
concept:televisionstation:kwse	concept:agentbelongstoorganization	concept:company:pbs	1
concept:televisionstation:klts_tv	concept:companyeconomicsector	concept:televisionnetwork:pbs	0
concept:televisionstation:ktci_tv	concept:agentbelongstoorganization	concept:company:pbs	1
concept:televisionstation:krne_tv	concept:headquarteredin	concept:televisionstation:wtvi	0
concept:televisionstation:wmae_tv	concept:agentcollaborateswithagent	concept:company:pbs	1
concept:televisionstation:wlae_tv	concept:companyeconomicsector	concept:televisionstation:kaet	0
concept:televisionstation:wunj_tv	concept:televisionstationaffiliatedwith	concept:televisionnetwork:pbs	1
concept:televisionstation:wsec	concept:organizationheadquarteredincity	concept:televisionstation:krma_tv	0
concept:televisionstation:kufm_tv	concept:agentbelongstoorganization	concept:company:pbs	1
concept:televisionstation:koac_tv	concept:subpartoforganization	concept:televisionstation:wwpb	0
concept:televisionstation:kufm_tv	concept:subpartoforganization	concept:televisionnetwork:pbs	1
concept:televisionstation:wfpt	concept:agentbelongstoorganization	concept:televisionstation:kpts	0
concept:televisionstation:wpbt	concept:subpartof	concept:company:pbs	1
concept:televisionstation:kdin_tv	concept:acquired	concept:televisionstation:wvut	0
concept:televisionstation:whmc	concept:subpartoforganization	concept:televisionnetwork:pbs	1
concept:televisionstation:kbtc_tv	concept:agentbelongstoorganization	concept:televisionstation:wmaw_tv	0
concept:company:pbs	concept:agentcontrols	concept:televisionstation:kcts_tv	1
concept:televisionstation:wiiq	concept:organizationhiredperson	concept:televisionstation:wjeb_tv	0
concept:televisionstation:whtj	concept:subpartoforganization	concept:televisionnetwork:pbs	1
concept:televisionstation:wlrn_tv	concept:organizationheadquarteredincity	concept:televisionstation:wpby_tv	0
concept:company:pbs	concept:agentcontrols	concept:televisionstation:wlpb_tv	1
concept:televisionstation:wiiq	concept:companyeconomicsector	concept:televisionstation:wmaw_tv	0
concept:televisionstation:wkno_tv	concept:agentbelongstoorganization	concept:company:pbs	1
concept:televisionstation:wpby_tv	concept:organizationhiredperson	concept:televisionstation:wenh	0
concept:televisionstation:ktsd_tv	concept:agentbelongstoorganization	concept:company:pbs	1
concept:televisionstation:kcdt_tv	concept:topmemberoforganization	concept:televisionstation:kawe	0
concept:televisionstation:wviz_tv	concept:agentbelongstoorganization	concept:company:pbs	1
concept:televisionstation:wrja_tv	concept:worksfor	concept:televisionstation:wosu_tv	0
concept:company:pbs	concept:agentcontrols	concept:televisionstation:wgvu_tv	1
concept:televisionstation:kcsd_tv	concept:organizationheadquarteredincity	concept:televisionstation:klts_tv	0
concept:company:pbs	concept:agentcontrols	concept:televisionstation:wbiq_tv	1
concept:televisionstation:kmne_tv	concept:organizationterminatedperson	concept:televisionstation:wbcc_tv	0
concept:company:pbs	concept:agentcontrols	concept:televisionstation:woub_tv	1
concept:televisionstation:wkas	concept:televisionstationaffiliatedwith	concept:televisionstation:kpsd_tv	0
concept:televisionstation:wenh	concept:televisionstationaffiliatedwith	concept:televisionnetwork:pbs	1
concept:televisionstation:wcfe_tv	concept:agentbelongstoorganization	concept:televisionstation:kltm_tv	0
concept:televisionstation:kbyu_tv	concept:subpartof	concept:company:pbs	1
concept:televisionstation:wunl_tv	concept:topmemberoforganization	concept:televisionstation:wfpt	0
concept:televisionstation:wunm_tv	concept:agentbelongstoorganization	concept:company:pbs	1
concept:televisionstation:kpne_tv	concept:companyeconomicsector	concept:televisionstation:wosu_tv	0
concept:televisionstation:klru	concept:televisionstationaffiliatedwith	concept:televisionnetwork:pbs	1
concept:televisionstation:wdse_tv	concept:worksfor	concept:televisionstation:wunp_tv	0
concept:televisionstation:wgby_tv	concept:subpartof	concept:company:pbs	1
concept:televisionstation:wkpi	concept:acquired	concept:televisionstation:wbcc_tv	0
concept:company:pbs	concept:agentcontrols	concept:televisionstation:wdse_tv	1
concept:televisionstation:wunp_tv	concept:televisionstationaffiliatedwith	concept:televisionstation:wbra_tv	0
concept:company:pbs	concept:agentcontrols	concept:televisionstation:wmpt	1
concept:televisionstation:kvcr_tv	concept:subpartof	concept:televisionstation:wfpt	0
concept:televisionstation:kacv_tv	concept:subpartof	concept:company:pbs	1
concept:televisionstation:ketg	concept:agentbelongstoorganization	concept:televisionstation:wpby_tv	0
concept:televisionstation:kaet	concept:subpartof	concept:company:pbs	1
concept:televisionstation:kets_tv	concept:televisionstationaffiliatedwith	concept:televisionstation:wfpt	0
concept:televisionstation:ketc	concept:agentcollaborateswithagent	concept:company:pbs	1
concept:televisionstation:krwg_tv	concept:agentcollaborateswithagent	concept:televisionstation:kera_tv	0
concept:televisionstation:kbhe_tv	concept:subpartof	concept:company:pbs	1
concept:televisionstation:kvie	concept:organizationhiredperson	concept:televisionstation:wkoh	0
concept:televisionstation:kwse	concept:televisionstationaffiliatedwith	concept:televisionnetwork:pbs	1
concept:company:kemv	concept:organizationterminatedperson	concept:televisionstation:wkso_tv	0
concept:televisionstation:krwg_tv	concept:subpartof	concept:company:pbs	1
concept:televisionstation:wjeb_tv	concept:organizationhiredperson	concept:televisionstation:wpbo_tv	0
concept:televisionstation:weta_tv	concept:subpartof	concept:company:pbs	1
concept:televisionstation:wmaw_tv	concept:agentcontrols	concept:televisionstation:witf_tv	0
concept:company:pbs	concept:agentcontrols	concept:televisionstation:kisu_tv	1
concept:televisionstation:wpsx_tv	concept:subpartof	concept:televisionstation:wha	0
concept:televisionstation:wfwa	concept:subpartof	concept:company:pbs	1
concept:televisionstation:ksps_tv	concept:agentcollaborateswithagent	concept:televisionstation:kamu_tv	0
concept:televisionstation:weta_tv	concept:televisionstationaffiliatedwith	concept:televisionnetwork:pbs	1
concept:televisionstation:kdck	concept:agentcontrols	concept:televisionstation:wpba	0
concept:televisionstation:kcwc_tv	concept:subpartof	concept:company:pbs	1
concept:website:keta_tv	concept:agentcontrols	concept:televisionstation:whro_tv	0
concept:televisionstation:ktne_tv	concept:televisionstationaffiliatedwith	concept:televisionnetwork:pbs	1
concept:televisionstation:wbcc_tv	concept:subpartof	concept:televisionstation:kopb_tv	0
concept:company:pbs	concept:agentcontrols	concept:televisionstation:wmsy_tv	1
concept:televisionstation:kaet	concept:organizationhiredperson	concept:televisionstation:kzsd_tv	0
concept:company:pbs	concept:agentcontrols	concept:televisionstation:kopb_tv	1
concept:televisionstation:wlrn_tv	concept:organizationterminatedperson	concept:personus:pat_mitchell	0
concept:televisionstation:wund_tv	concept:subpartof	concept:company:pbs	1
concept:televisionstation:wpto	concept:organizationhiredperson	concept:televisionstation:whmc	0
concept:company:pbs	concept:agentcontrols	concept:televisionstation:kamu_tv	1
concept:televisionstation:wqpt_tv	concept:agentcollaborateswithagent	concept:televisionstation:kixe_tv	0
concept:company:pbs	concept:agentcontrols	concept:televisionstation:wkzt_tv	1
concept:company:pbs	concept:subpartof	concept:city:new_york	0
concept:company:pbs	concept:agentcontrols	concept:televisionstation:wpby_tv	1
concept:televisionstation:wkmr	concept:companyeconomicsector	concept:academicfield:media	0
concept:televisionstation:kedt	concept:televisionstationaffiliatedwith	concept:televisionnetwork:pbs	1
concept:televisionstation:kopb_tv	concept:agentcontrols	concept:televisionstation:kwet	0
concept:televisionstation:ketg	concept:subpartof	concept:company:pbs	1
concept:televisionstation:wlvt_tv	concept:agentcontrols	concept:televisionstation:kcet	0
concept:televisionstation:whro_tv	concept:agentcollaborateswithagent	concept:company:pbs	1
concept:televisionstation:wunc_tv	concept:organizationhiredperson	concept:televisionstation:wfsu_tv	0
concept:televisionstation:wneo	concept:agentcollaborateswithagent	concept:company:pbs	1
concept:televisionstation:wljt_tv	concept:organizationterminatedperson	concept:televisionstation:whla_tv	0
concept:televisionstation:wpbt	concept:subpartoforganization	concept:televisionnetwork:pbs	1
concept:televisionstation:klpa_tv	concept:agentcontrols	concept:televisionstation:kbme_tv	0
concept:televisionstation:kcwc_tv	concept:agentbelongstoorganization	concept:company:pbs	1
concept:televisionstation:wpba	concept:agentcollaborateswithagent	concept:televisionstation:wsec	0
concept:televisionstation:kopb_tv	concept:televisionstationaffiliatedwith	concept:televisionnetwork:pbs	1
concept:televisionstation:kyne_tv	concept:companyeconomicsector	concept:televisionstation:whtj	0
concept:televisionstation:wlrn_tv	concept:agentcollaborateswithagent	concept:company:pbs	1
concept:televisionstation:kfts	concept:agentbelongstoorganization	concept:televisionstation:kdck	0
concept:televisionstation:weta_tv	concept:agentcollaborateswithagent	concept:company:pbs	1
concept:televisionstation:wnjn	concept:agentbelongstoorganization	concept:televisionstation:kawe	0
concept:televisionstation:kera_tv	concept:agentbelongstoorganization	concept:company:pbs	1
concept:televisionstation:kvcr_tv	concept:agentbelongstoorganization	concept:televisionstation:wmaw_tv	0
concept:company:pbs	concept:agentcontrols	concept:televisionstation:wkha	1
concept:televisionstation:wouc_tv	concept:worksfor	concept:televisionstation:wkmu	0
