# Supplementary material
Source: ML conference proceedings conference paper supplement (https://proceedings.neurips.cc/paper_files/paper/2021/hash/0fd600c953cde8121262e322ef09f70e-Abstract.html)
Supplement: Supplementary file 1 [file 0fd600c953cde8121262e322ef09f70e-Supplemental.zip › Supplementary_Material_Paper_8745/data/GraIL-BM_nell_v1/train/train.txt]

concept:coach:harbaugh	concept:worksfor	concept:sportsteam:ravens
concept:county:detroit	concept:organizationhiredperson	concept:politician:dave_bing
concept:university:iu	concept:organizationhiredperson	concept:person:knight
concept:sportsteam:ravens	concept:organizationhiredperson	concept:writer:brian_billick
concept:sportsteam:minnesota_vikings	concept:organizationhiredperson	concept:coach:brad_childress
concept:university:kent_state	concept:organizationhiredperson	concept:coach:doug_martin
concept:blog:america_online	concept:agentcollaborateswithagent	concept:ceo:steve_case
concept:male:sun	concept:agentcontrols	concept:actor:scott_mcnealy
concept:sportsteam:georgia_southern_eagles	concept:agentcollaborateswithagent	concept:personmexico:ncaa
concept:nongovorganization:legislature	concept:subpartoforganization	concept:organization:the_country
concept:nongovorganization:u_s_	concept:organizationhiredperson	concept:coach:tony_dicicco
concept:personmexico:ncaa	concept:agentcontrols	concept:sportsteam:boise_state_broncos
concept:city:florida	concept:organizationhiredperson	concept:coach:steve_spurrier
concept:vehicle:states	concept:subpartof	concept:city:texas
concept:programminglanguage:system	concept:subpartof	concept:visualizablething:commercial_water
concept:sportsteam:georgia_bulldogs	concept:subpartoforganization	concept:sportsteam:ncaa_youth_kids
concept:coach:charlie_weis	concept:agentcollaborateswithagent	concept:male:notre_dame
concept:bedroomitem:new	concept:subpartof	concept:musicsong:louisiana
concept:buildingfeature:systems	concept:subpartof	concept:beverage:large_water
concept:website:facebook	concept:headquarteredin	concept:city:palo_alto
concept:televisionstation:wbre_tv	concept:subpartof	concept:retailstore:nbc
concept:person:les_moonves	concept:agentcontrols	concept:website:cbs
concept:creditunion:kansas	concept:organizationhiredperson	concept:personaustralia:bill_self
concept:city:guyana	concept:agentbelongstoorganization	concept:sportsleague:mls
concept:personus:joe_dimaggio	concept:subpartof	concept:sportsleague:new
concept:university:haverford_college	concept:agentcontrols	concept:book:tim
concept:male:world	concept:agentcollaborateswithagent	concept:politician:jobs
concept:sportsteam:orlando_magic	concept:organizationhiredperson	concept:chef:brian_hill
concept:sportsteam:utep_miners	concept:subpartoforganization	concept:sportsteam:ncaa_youth_kids
concept:company:aol	concept:agentcollaborateswithagent	concept:company:case
concept:city:members	concept:organizationhiredperson	concept:personmexico:ryan_whitney
concept:creditunion:michigan	concept:subpartoforganization	concept:sportsteam:ncaa_mens_midwest_regionals
concept:website:facebook	concept:organizationheadquarteredincity	concept:city:palo_alto
concept:sportsteam:long_island_blackbirds	concept:subpartoforganization	concept:sportsteam:ncaa_youth_kids
concept:governmentorganization:governments	concept:organizationhiredperson	concept:personmexico:ryan_whitney
concept:mountain:fox	concept:agentcollaborateswithagent	concept:politicsblog:geraldo_rivera
concept:university:memphis	concept:subpartoforganization	concept:sportsteam:ncaa_youth_kids
concept:mlalgorithm:ames	concept:subpartof	concept:musicalbum:iowa
concept:programminglanguage:services	concept:subpartof	concept:buildingmaterial:drainage
concept:sportsteam:florida_international	concept:organizationhiredperson	concept:coach:john_fox
concept:legume:tempe	concept:subpartof	concept:beverage:arizona
concept:buildingfeature:systems	concept:subpartof	concept:visualizablething:waste_water
concept:university:msu	concept:organizationhiredperson	concept:coach:sylvester_croom
concept:athlete:joe_flacco	concept:subpartof	concept:sportsteam:ravens
concept:bodypart:affected_areas	concept:subpartof	concept:weatherphenomenon:water
concept:sportsteam:broncos	concept:organizationhiredperson	concept:coach:mike_shanahan
concept:city:service	concept:agentcontrols	concept:hotel:job
concept:personmexico:ncaa	concept:agentcontrols	concept:sportsteam:louisville_cardinals
concept:coach:rick_barnes	concept:worksfor	concept:city:texas
concept:musicartist:season	concept:organizationhiredperson	concept:person:jose_juan_barea
concept:sportsequipment:goal	concept:subpartof	concept:weatherphenomenon:water
concept:buildingfeature:systems	concept:subpartof	concept:chemical:pipes
concept:company:north_carolina	concept:agentbelongstoorganization	concept:sportsteam:ncaa_youth_kids
concept:company:ibm	concept:organizationterminatedperson	concept:ceo:samuel_j__palmisano
concept:sportsteam:middle_tennessee_state_blue_raiders	concept:subpartoforganization	concept:sportsteam:ncaa_youth_kids
concept:website:wptv	concept:subpartof	concept:retailstore:nbc
concept:sportsteam:germany	concept:organizationhiredperson	concept:coach:joachim_loew
concept:city:lakeland	concept:subpartof	concept:city:florida
concept:programminglanguage:system	concept:subpartof	concept:beverage:advanced_water
concept:website:netscape	concept:subpartoforganization	concept:blog:america_online
concept:geopoliticallocation:kerry	concept:agentcollaborateswithagent	concept:personus:john_edwards
concept:politicsblog:geraldo_rivera	concept:agentcollaborateswithagent	concept:mountain:fox
concept:blog:google	concept:acquired	concept:company:doubleclick
concept:city:miami_beach	concept:subpartof	concept:city:florida
concept:sportsteam:marquette_golden_eagles	concept:agentcollaborateswithagent	concept:personmexico:ncaa
concept:company:nbc	concept:agentcontrols	concept:newspaper:wcsh_tv
concept:museum:facilities	concept:subpartof	concept:visualizableattribute:major_water
concept:politician:congress	concept:agentcollaborateswithagent	concept:company:clinton
concept:coach:brett_lee	concept:worksfor	concept:university:uw
concept:coach:tom_coughlin	concept:worksfor	concept:sportsteam:new_york_giants
concept:personmexico:isaiah_thomas	concept:worksfor	concept:sportsteam:knicks
concept:organization:kremlin	concept:organizationterminatedperson	concept:person:alexander_korzhakov
concept:sportsteam:new_orleans_saints	concept:organizationhiredperson	concept:coach:mike_ditka
concept:coach:tommy_tuberville	concept:subpartof	concept:stateorprovince:auburn
concept:blog:sun	concept:organizationheadquarteredincity	concept:city:washington_d_c
concept:personmexico:ncaa	concept:agentcontrols	concept:sportsteam:western_kentucky_hilltoppers
concept:county:chicago	concept:organizationhiredperson	concept:coach:mike_ditka
concept:personmexico:ncaa	concept:agentcontrols	concept:sportsteam:louisiana_lafayette_ragin_cajuns
concept:company:flickr001	concept:organizationterminatedperson	concept:person:caterina_fake
concept:company:microsoft	concept:companyeconomicsector	concept:academicfield:information_technology
concept:coach:new	concept:subpartof	concept:city:florida
concept:island:head	concept:subpartof	concept:software:adrenalin
concept:programminglanguage:system	concept:subpartof	concept:beverage:modern_water
concept:coach:new_york_knicks	concept:agentbelongstoorganization	concept:sportsleague:nba
concept:coach:rex_ryan	concept:subpartof	concept:sportsleague:new
concept:actor:scott_mcnealy	concept:agentcontrols	concept:male:sun
concept:company:booksurge	concept:companyeconomicsector	concept:economicsector:internet
concept:county:san_francisco	concept:organizationhiredperson	concept:athlete:mike_singletary
concept:recordlabel:dreamworks_skg	concept:organizationterminatedperson	concept:ceo:jeffrey_katzenberg
concept:company:nbc	concept:agentcontrols	concept:website:wdtn
concept:company:nbc	concept:agentcontrols	concept:televisionstation:kcen
concept:female:universal_studios	concept:agentcontrols	concept:person:ron_meyer
concept:sportsteam:steelers	concept:organizationhiredperson	concept:coach:ken_whisenhunt
concept:bedroomitem:new	concept:subpartof	concept:room:way
concept:company:ebay002	concept:acquired	concept:company:skype_com
concept:stateorprovince:indiana	concept:organizationhiredperson	concept:coach:terry_hoeppner
concept:coach:scott_linehan	concept:worksfor	concept:city:st_louis
concept:tradeunion:congress	concept:agentcollaborateswithagent	concept:fish:white
concept:personmexico:ncaa	concept:agentcontrols	concept:sportsteam:delaware_state_hornets
concept:room:offices	concept:subpartof	concept:programminglanguage:state
concept:month:june	concept:subpartof	concept:stateorprovince:illinois
concept:county:philadelphia	concept:subpartof	concept:stateorprovince:pennsylvania
concept:sportsteam:colorado_college	concept:agentcollaborateswithagent	concept:personmexico:ncaa
concept:celebrity:venice	concept:subpartof	concept:city:florida
concept:stateorprovince:arizona	concept:organizationhiredperson	concept:coach:ken_whisenhunt
concept:bedroomitem:new	concept:subpartof	concept:musicalbum:life
concept:televisionstation:wand	concept:televisionstationaffiliatedwith	concept:televisionnetwork:nbc_universal
concept:county:miami	concept:organizationhiredperson	concept:coach:frank_haith
concept:personmexico:ncaa	concept:agentcontrols	concept:sportsteam:augustana_vikings
concept:coach:tom_o_brien	concept:worksfor	concept:sportsteam:boston_college
concept:company:business_week	concept:agentcollaborateswithagent	concept:coach:stephen_baker
concept:personmexico:ryan_whitney	concept:worksfor	concept:governmentorganization:state_department
concept:coach:carroll	concept:worksfor	concept:sportsteam:usc
concept:city:marysville	concept:subpartof	concept:city:washington_d_c
concept:stateorprovince:vermont	concept:subpartof	concept:country:usa
concept:blog:google	concept:acquired	concept:company:greenborder
concept:city:santa_cruz_das_flores	concept:subpartof	concept:stateorprovince:california
concept:organization:kremlin	concept:organizationhiredperson	concept:personmexico:ryan_whitney
concept:person:mccain	concept:agentcollaborateswithagent	concept:politicianus:democratic_presidential_candidate_barack_obama
concept:personmexico:ncaa	concept:agentcontrols	concept:sportsteam:southern_methodist_mustangs
concept:bank:administration	concept:subpartof	concept:weatherphenomenon:water
concept:coach:new	concept:subpartof	concept:publication:people_
concept:county:miami	concept:organizationhiredperson	concept:coach:manny_diaz
concept:museum:facilities	concept:subpartof	concept:beverage:industrial_water
concept:sportsteam:miami_dolphins	concept:organizationhiredperson	concept:coach:sparano
concept:company:pixar	concept:agentcontrols	concept:website:jobs
concept:televisionstation:keci	concept:subpartof	concept:retailstore:nbc
concept:city:bush	concept:organizationhiredperson	concept:personmexico:ryan_whitney
concept:city:ottawa	concept:organizationhiredperson	concept:coach:jim_watson
concept:website:campaigns	concept:subpartof	concept:weatherphenomenon:water
concept:televisionstation:wyff_tv	concept:subpartof	concept:retailstore:nbc
concept:televisionstation:wpxi_tv	concept:organizationheadquarteredincity	concept:city:pittsburgh
concept:governmentorganization:government	concept:agentcontrols	concept:programminglanguage:technology
concept:buildingfeature:systems	concept:subpartof	concept:beverage:industrial_water
concept:county:salem	concept:subpartof	concept:politicsissue:oregon
concept:televisionstation:ktuu	concept:televisionstationaffiliatedwith	concept:televisionnetwork:nbc_universal
concept:stateorprovince:wyoming_cowboys	concept:agentcollaborateswithagent	concept:personmexico:ncaa
concept:sportsteam:notre_dame	concept:organizationhiredperson	concept:coach:charlie_weis
concept:personmexico:ncaa	concept:agentcontrols	concept:sportsteam:brown_bears
concept:politicalparty:republican_party	concept:organizationhiredperson	concept:personmexico:ryan_whitney
concept:city:bellevue	concept:subpartof	concept:city:washington_d_c
concept:vehicle:states	concept:subpartof	concept:sportsequipment:northwest
concept:stateorprovince:tennessee	concept:organizationhiredperson	concept:person:lane_kiffin
concept:website:kfor_tv	concept:subpartof	concept:retailstore:nbc
concept:city:cincinnati	concept:organizationhiredperson	concept:politician:mark_l__mallory
concept:stateorprovince:colorado	concept:subpartoforganization	concept:sportsteam:ncaa_youth_kids
concept:stateorprovince:south_carolina	concept:organizationhiredperson	concept:coach:ron_cooper
concept:sportsleague:nfl	concept:organizationterminatedperson	concept:scientist:no_
concept:sportsteam:minnesota_wilds	concept:agentcollaborateswithagent	concept:athlete:niklas_backstrom
concept:sportsteam:san_diego_padres	concept:subpartoforganization	concept:sportsleague:nfl
concept:city:san_bernardino	concept:subpartof	concept:stateorprovince:california
concept:programminglanguage:system	concept:subpartof	concept:governmentorganization:stormwater
concept:university:microsoft	concept:agentcollaborateswithagent	concept:company:gates
concept:sportsteam:ohio_state_buckeyes	concept:subpartoforganization	concept:sportsteam:ncaa_youth_kids
concept:programminglanguage:system	concept:subpartof	concept:beverage:central_water
concept:academicfield:documents	concept:subpartof	concept:weatherphenomenon:water
concept:athlete:boston_red_sox	concept:subpartof	concept:sportsleague:mlb
concept:coach:d_antoni	concept:worksfor	concept:sportsteam:knicks
concept:personmexico:ncaa	concept:agentcontrols	concept:sportsteam:cameron_aggies
concept:sportsteam:new_york_giants	concept:organizationhiredperson	concept:coach:tom_coughlin
concept:televisionstation:wvva_tv	concept:subpartoforganization	concept:televisionnetwork:nbc_universal
concept:charactertrait:institutions	concept:subpartof	concept:weatherphenomenon:water
concept:jobposition:agency	concept:subpartof	concept:river:state
concept:sportsteam:broncos	concept:organizationhiredperson	concept:coach:josh_mcdaniels
concept:personmexico:ncaa	concept:agentcontrols	concept:sportsteam:montana_grizzlies
concept:celebrity:laura_bush	concept:agentcollaborateswithagent	concept:company:clinton
concept:politician:obama	concept:agentcollaborateswithagent	concept:politicianus:hillary_rodham_clinton
concept:biotechcompany:white	concept:agentbelongstoorganization	concept:tradeunion:congress
concept:sportsteam:ravens	concept:organizationhiredperson	concept:coach:billick
concept:sportsteam:italy	concept:agentcontrols	concept:personeurope:alessandro_del_piero
concept:person:bill	concept:agentcollaborateswithagent	concept:geopoliticallocation:kerry
concept:coach:new	concept:subpartof	concept:musicinstrument:africa
concept:publication:syracuse_university	concept:organizationhiredperson	concept:coach:ben_schwartzwalder
concept:bank:bank_america	concept:organizationterminatedperson	concept:ceo:kenneth_lewis
concept:university:boston_red_sox	concept:subpartoforganization	concept:sportsleague:mlb
concept:personmexico:ryan_whitney	concept:worksfor	concept:nongovorganization:council
concept:coach:new	concept:subpartof	concept:university:reasons
concept:city:number	concept:organizationhiredperson	concept:personmexico:ryan_whitney
concept:coach:toronto_blue_jays	concept:agentbelongstoorganization	concept:sportsleague:mlb
concept:radiostation:nevada	concept:organizationhiredperson	concept:personus:chris_ault
concept:person:mccain	concept:agentcollaborateswithagent	concept:politicianus:senator_clinton
concept:sportsteam:wake_forest	concept:organizationhiredperson	concept:coach:grobe
concept:personmexico:ncaa	concept:agentcontrols	concept:sportsteam:arkansas_state_red_wolves
concept:island:head	concept:subpartof	concept:vehicle:air
concept:company:nbc	concept:agentcontrols	concept:televisionstation:wpbn_tv
concept:sportsteam:new_england_patriots	concept:organizationhiredperson	concept:coach:carroll
concept:sportsteam:auburn_tigers	concept:subpartoforganization	concept:sportsteam:ncaa_youth_kids
concept:city:vienna	concept:subpartof	concept:country:republic_of_austria
concept:sportsteam:blue_jays	concept:agentcollaborateswithagent	concept:athlete:vernon_wells
concept:nongovorganization:zanu_pf	concept:agentcollaborateswithagent	concept:person:mugabe
concept:professionalorganization:lions	concept:organizationhiredperson	concept:coach:mariucci
concept:musicalbum:chattanooga	concept:subpartof	concept:weatherphenomenon:tennessee
concept:website:wbir_tv	concept:organizationheadquarteredincity	concept:city:knoxville
concept:terroristorganization:state	concept:agentcontrols	concept:programminglanguage:process
concept:city:midland	concept:subpartof	concept:stateorprovince:texas
concept:sportsteam:buccaneers	concept:organizationhiredperson	concept:coach:tony_dungy
concept:governmentorganization:departments	concept:organizationhiredperson	concept:personmexico:ryan_whitney
concept:athlete:mike_mccarthy	concept:worksfor	concept:sportsteam:packers
concept:tradeunion:congress	concept:organizationhiredperson	concept:person:republican
concept:sportsteam:boise_state_broncos	concept:subpartoforganization	concept:sportsteam:ncaa_youth_kids
concept:ceo:steve_case	concept:topmemberoforganization	concept:company:aol
concept:female:yankees	concept:agentcollaborateswithagent	concept:personus:hideki_matsui
concept:personmexico:arizona_diamond_backs	concept:agentcollaborateswithagent	concept:personus:luis_gonzalez
concept:personus:officials	concept:agentcontrols	concept:biotechcompany:white
concept:university:alabama	concept:organizationhiredperson	concept:coach:mark_gottfried
concept:coach:new	concept:subpartof	concept:aquarium:uk_
concept:sportsteam:vcu_rams	concept:subpartoforganization	concept:sportsteam:ncaa_youth_kids
concept:coach:chuck_long	concept:worksfor	concept:sportsteam:san_diego_padres
concept:website:yahoo_mail	concept:agentcollaborateswithagent	concept:ceo:terry_semel
concept:geopoliticallocation:kerry	concept:agentbelongstoorganization	concept:governmentorganization:house
concept:personmexico:ncaa	concept:agentcontrols	concept:sportsteam:winston_salem_state_rams
concept:stateorprovince:oklahoma	concept:organizationhiredperson	concept:coach:bud_wilkinson
concept:coach:kansas_city_chiefs	concept:agentcollaborateswithagent	concept:sportsleague:nfl
concept:politicianus:jimmy_carter	concept:agentcollaborateswithagent	concept:city:bush
concept:sportsteam:siena_saints	concept:agentcollaborateswithagent	concept:personmexico:ncaa
concept:televisionnetwork:cbs	concept:agentcollaborateswithagent	concept:journalist:bob_schieffer
concept:sportsteam:boise_state_broncos	concept:organizationhiredperson	concept:coach:chris_petersen
concept:televisionstation:wxii	concept:subpartof	concept:retailstore:nbc
concept:celebrity:gary_williams	concept:agentbelongstoorganization	concept:stateorprovince:maryland
concept:sportsteam:montana_grizzlies	concept:subpartoforganization	concept:sportsteam:ncaa_youth_kids
concept:stadiumoreventvenue:soldier_field	concept:subpartof	concept:county:chicago
concept:clothing:white	concept:subpartof	concept:clothing:dept
concept:coach:new	concept:subpartof	concept:country:korea
concept:sportsteam:dallas_mavericks	concept:agentcollaborateswithagent	concept:sportsleague:western_conference
concept:buildingfeature:systems	concept:subpartof	concept:visualizablething:wastewater
concept:sportsteam:leafs	concept:organizationhiredperson	concept:coach:paul_maurice
concept:journalist:nicholas_kristof	concept:worksfor	concept:musicartist:times
concept:stateorprovince:illinois	concept:subpartoforganization	concept:sportsteam:ncaa_youth_kids
concept:sportsteam:rockets	concept:organizationhiredperson	concept:coach:van_gundy
concept:company:clinton	concept:organizationheadquarteredincity	concept:city:brooklyn
concept:programminglanguage:services	concept:subpartof	concept:kitchenitem:public_water
concept:university:nebraska	concept:organizationhiredperson	concept:actor:callahan
concept:company:apple002	concept:agentcollaborateswithagent	concept:politicianus:john_sculley
concept:city:sources	concept:organizationhiredperson	concept:personmexico:ryan_whitney
concept:personus:steve_ballmer	concept:topmemberoforganization	concept:company:microsoft
concept:coach:harbaugh	concept:worksfor	concept:sportsteam:stanford
concept:nongovorganization:democrat	concept:subpartoforganization	concept:governmentorganization:house
concept:city:team	concept:agentcollaborateswithagent	concept:politician:jobs
concept:city:carmel_by_the_sea	concept:subpartof	concept:stateorprovince:indiana
concept:stateorprovince:ole_miss	concept:organizationhiredperson	concept:coach:houston_nutt
concept:personmexico:ncaa	concept:agentcontrols	concept:sportsteam:kansas_state
concept:city:gillette	concept:subpartof	concept:stateorprovince:wyoming
concept:museum:facilities	concept:subpartof	concept:visualizablething:wastewater
concept:coach:new	concept:subpartof	concept:company:new_york
concept:sportsteam:bucs	concept:organizationhiredperson	concept:coach:raheem_morris
concept:city:port_huron	concept:subpartof	concept:creditunion:michigan
concept:sportsteam:indiana_hoosiers	concept:agentcollaborateswithagent	concept:personmexico:ncaa
concept:country:sierra_leone	concept:agentbelongstoorganization	concept:sportsleague:mls
concept:city:pittsburgh	concept:organizationhiredperson	concept:male:dave_wannstedt
concept:geopoliticallocation:agencies	concept:subpartoforganization	concept:landscapefeatures:states
concept:person:matt_mullenweg	concept:worksfor	concept:blog:wordpress
concept:blog:george_w__bush	concept:agentcollaborateswithagent	concept:company:clinton
concept:vehicle:services	concept:subpartof	concept:musicalbum:us
concept:governmentorganization:homeland_security	concept:organizationhiredperson	concept:personmexico:ryan_whitney
concept:journalist:dan_rather	concept:worksfor	concept:televisionnetwork:cbs
concept:newspaper:jane	concept:agentcontrols	concept:weatherphenomenon:world
concept:sportsteam:old_dominion_monarchs	concept:subpartoforganization	concept:sportsteam:ncaa_youth_kids
concept:building:houses	concept:subpartof	concept:weatherphenomenon:water
concept:city:beijing	concept:organizationhiredperson	concept:personmexico:ryan_whitney
concept:university:media	concept:organizationhiredperson	concept:personmexico:ryan_whitney
concept:coach:new	concept:subpartof	concept:sportsgame:yrs
concept:coach:bill_lynch	concept:worksfor	concept:stateorprovince:indiana
concept:room:community	concept:subpartof	concept:politicsissue:energy
concept:chemical:management	concept:subpartof	concept:visualizablething:effective_water
concept:person:greg001	concept:agentcollaborateswithagent	concept:male:world
concept:website:jobs	concept:subpartof	concept:company:pixar
concept:ceo:frederick_smith	concept:topmemberoforganization	concept:magazine:fedex
concept:male:notre_dame	concept:agentcontrols	concept:coach:tyrone_willingham
concept:website:universal	concept:subpartof	concept:company:vivendi_games
concept:sportsteam:central_michigan_chippewas	concept:subpartoforganization	concept:sportsteam:ncaa_youth_kids
concept:city:dallas	concept:organizationhiredperson	concept:coach:sparano
concept:sportsteam:ohio_state_university	concept:subpartoforganization	concept:sportsteam:ncaa_mens_midwest_regionals
concept:sportsteam:stanford	concept:subpartoforganization	concept:sportsteam:ncaa_mens_midwest_regionals
concept:coach:oklahoma_sooners	concept:agentcollaborateswithagent	concept:sportsteam:ncaa_youth_kids
concept:county:miami	concept:organizationhiredperson	concept:male:dave_wannstedt
concept:bird:star	concept:agentcollaborateswithagent	concept:person:ronaldo
concept:sportsteam:detroit_lions	concept:organizationhiredperson	concept:coach:marty_mornhinweg
concept:televisionstation:wicd	concept:subpartof	concept:retailstore:nbc
concept:person:mccain	concept:agentcollaborateswithagent	concept:person:bill
concept:sportsteam:ncaa_youth_kids	concept:agentcontrols	concept:coach:kentucky_wildcats
concept:sportsteam:texas_a_m	concept:organizationhiredperson	concept:person:sherman
concept:governmentorganization:fbi	concept:organizationterminatedperson	concept:personmexico:ryan_whitney
concept:personmexico:ncaa	concept:agentcontrols	concept:sportsteam:arkansas_pine_bluff_golden_lions
concept:city:houston	concept:organizationhiredperson	concept:coach:kevin_sumlin
concept:city:communities	concept:subpartoforganization	concept:terroristorganization:state
concept:university:cu	concept:organizationhiredperson	concept:coach:gary_barnett
concept:city:gardena	concept:subpartof	concept:stateorprovince:california
concept:personmexico:ncaa	concept:agentcontrols	concept:sportsteam:oral_roberts_golden_eagles
concept:sportsteam:northwestern_state_demons	concept:subpartoforganization	concept:sportsteam:ncaa_youth_kids
concept:bedroomitem:new	concept:subpartof	concept:book:five_years
concept:personmexico:ncaa	concept:agentcontrols	concept:sportsteam:northern_illinois_huskies
concept:publication:people_	concept:agentcollaborateswithagent	concept:personaustralia:jobs
concept:city:summit	concept:organizationhiredperson	concept:personmexico:ryan_whitney
concept:crimeorcharge:fort_pierce	concept:subpartof	concept:city:florida
concept:sportsteam:razorbacks	concept:organizationhiredperson	concept:coach:bobby_petrino
concept:coach:new_york_giants	concept:subpartof	concept:sportsleague:nfl
concept:blog:science	concept:agentcollaborateswithagent	concept:personus:jon_cohen
concept:university:iu	concept:organizationhiredperson	concept:coach:bill_lynch
concept:politician:obama	concept:agentcollaborateswithagent	concept:politicianus:bill_clinton
concept:sportsteam:morehouse_maroon_tigers	concept:agentcollaborateswithagent	concept:personmexico:ncaa
concept:room:dates	concept:subpartof	concept:weatherphenomenon:water
concept:personmexico:ncaa	concept:agentcontrols	concept:sportsteam:northern_iowa_panthers
concept:politician:jobs	concept:agentcontrols	concept:ceo:eric_schmidt
concept:politicaloffice:wisconsin	concept:subpartof	concept:sportsteam:ncaa_mens_midwest_regionals
concept:governmentorganization:state_department	concept:organizationhiredperson	concept:personmexico:ryan_whitney
concept:city:arena	concept:subpartoforganization	concept:terroristorganization:state
concept:company:nbc	concept:agentcontrols	concept:televisionstation:wcmh_tv
concept:celebrity:southern_illinois_salukis	concept:subpartof	concept:sportsteam:ncaa_youth_kids
concept:coach:philip_fulmer	concept:worksfor	concept:geopoliticallocation:ut
concept:sportsteam:rams	concept:organizationhiredperson	concept:coach:scott_linehan
concept:coach:john_beilein	concept:worksfor	concept:company:west_virginia
concept:website:experience	concept:subpartoforganization	concept:terroristorganization:state
concept:city:home	concept:subpartoforganization	concept:governmentorganization:government
concept:male:world	concept:agentcollaborateswithagent	concept:person:michael002
concept:sportsteam:ucla	concept:organizationhiredperson	concept:coach:john_wooden
concept:company:north_carolina	concept:organizationhiredperson	concept:coach:everett_withers
concept:terroristorganization:state	concept:agentcontrols	concept:politicsissue:laws
concept:personmexico:ryan_whitney	concept:worksfor	concept:university:administration
concept:vehicle:states	concept:subpartof	concept:book:middle
concept:coach:baltimore_ravens	concept:agentcollaborateswithagent	concept:sportsleague:nfl
concept:sportsteam:eastern_kentucky_colonels	concept:agentcollaborateswithagent	concept:personmexico:ncaa
concept:company:nbc	concept:agentcontrols	concept:televisionstation:wtwc_tv
concept:governmentorganization:government	concept:agentcontrols	concept:website:homes
concept:publication:syracuse_university	concept:organizationhiredperson	concept:coach:jim_boeheim
concept:beverage:hershey	concept:subpartof	concept:stateorprovince:pennsylvania
concept:governmentorganization:rule	concept:organizationhiredperson	concept:personmexico:ryan_whitney
concept:televisionnetwork:cbs	concept:agentcollaborateswithagent	concept:personmexico:david_martin
concept:officebuildingroom:living_room	concept:subpartof	concept:weatherphenomenon:water
concept:personmexico:ncaa	concept:agentcontrols	concept:sportsteam:east_carolina_pirates
concept:sportsteam:new_mexico_state_aggies	concept:subpartoforganization	concept:sportsteam:ncaa_youth_kids
concept:televisionstation:kcen	concept:televisionstationaffiliatedwith	concept:televisionnetwork:nbc_universal
concept:company:national_public_radio	concept:headquarteredin	concept:city:washington_d_c
concept:sportsteam:saint_louis_billikens	concept:subpartoforganization	concept:sportsteam:ncaa_youth_kids
concept:company:missouri	concept:companyeconomicsector	concept:economicsector:insurance
concept:sportsteam:lsu	concept:organizationhiredperson	concept:coach:nick_saban
concept:stateorprovince:mailing	concept:subpartoforganization	concept:blog:form
concept:personus:john_gibson	concept:worksfor	concept:mountain:fox
concept:televisionstation:kveo_tv	concept:televisionstationaffiliatedwith	concept:televisionnetwork:nbc_universal
concept:politicianus:democratic_nominee_barack_obama	concept:agentcollaborateswithagent	concept:person:mccain
concept:city:fairchild_air_force_base	concept:organizationhiredperson	concept:coach:fisher_deberry
concept:organization:republicans	concept:organizationhiredperson	concept:personmexico:ryan_whitney
concept:coach:tom_cable	concept:worksfor	concept:university:raiders
concept:sportsteam:nevada_wolfpack	concept:subpartoforganization	concept:sportsteam:ncaa_youth_kids
concept:personmexico:ryan_whitney	concept:worksfor	concept:governmentorganization:intelligence_community
concept:sportsteam:notre_dame	concept:organizationhiredperson	concept:coach:tyrone_willingham
concept:politicsblog:tribune	concept:agentcontrols	concept:terroristorganization:le_monde
concept:politicianus:bill_clinton	concept:agentbelongstoorganization	concept:politicalparty:house
concept:ceo:jeffrey_katzenberg	concept:topmemberoforganization	concept:recordlabel:dreamworks_skg
concept:sportsteam:san_antonio	concept:organizationhiredperson	concept:coach:gregg_popovich
concept:governmentorganization:government	concept:agentcontrols	concept:scientificterm:statistical_information
concept:personmexico:ryan_whitney	concept:worksfor	concept:governmentorganization:justice_department
concept:televisionstation:ktvm	concept:televisionstationaffiliatedwith	concept:televisionnetwork:nbc_universal
concept:city:challenge	concept:subpartof	concept:weatherphenomenon:air
concept:person:lawrence_frank	concept:worksfor	concept:sportsteam:new_jersey_nets
concept:governmentorganization:department	concept:subpartoforganization	concept:governmentorganization:treasury
concept:visualizablething:measures	concept:subpartof	concept:weatherphenomenon:water
concept:personmexico:ryan_whitney	concept:worksfor	concept:terroristorganization:group
concept:coach:steve_sarkisian	concept:worksfor	concept:city:washington_d_c
concept:stateorprovince:facility	concept:subpartoforganization	concept:terroristorganization:state
concept:coach:scott_linehan	concept:worksfor	concept:sportsleague:new
concept:company:nbc	concept:agentcontrols	concept:website:kprc_tv
concept:coach:cam_cameron	concept:worksfor	concept:county:miami
concept:stateorprovince:colorado	concept:organizationhiredperson	concept:coach:bill_mccartney
concept:company:nbc	concept:agentcontrols	concept:televisionstation:kark_tv
concept:company:cnn__pbs	concept:subpartoforganization	concept:bank:viacom
concept:televisionstation:wbbh_tv	concept:subpartoforganization	concept:televisionnetwork:nbc_universal
concept:politicsblog:tribune	concept:agentcontrols	concept:politicsblog:wall_street_journal
concept:politician:jobs	concept:agentcontrols	concept:county:newton
concept:website:wfxt	concept:subpartof	concept:mountain:fox
concept:personmexico:mack_brown	concept:worksfor	concept:city:texas
concept:county:detroit	concept:organizationhiredperson	concept:coach:jim_schwartz
concept:personmexico:ncaa	concept:agentcontrols	concept:sportsteam:indiana_hoosiers
concept:politicsblog:tribune	concept:agentcontrols	concept:building:times
concept:sportsteam:sd_chargers	concept:organizationhiredperson	concept:athlete:marty_schottenheimer
concept:sportsteam:real_madrid	concept:organizationhiredperson	concept:athlete:bernd_schuster
concept:blog:google	concept:acquired	concept:company:deja
concept:personmexico:ncaa	concept:agentcontrols	concept:sportsteam:appalachian_state_mo
concept:politician:jobs	concept:agentcontrols	concept:nonneginteger:one
concept:city:rio	concept:subpartof	concept:traditionalgame:vegas
concept:athlete:records	concept:agentbelongstoorganization	concept:governmentorganization:government
concept:person:government	concept:agentcollaborateswithagent	concept:nongovorganization:information
concept:personasia:site	concept:agentbelongstoorganization	concept:terroristorganization:state
concept:city:carlisle	concept:subpartof	concept:stateorprovince:pennsylvania
concept:stateorprovince:colorado	concept:organizationhiredperson	concept:coach:dan_hawkins
concept:governmentorganization:treasury	concept:agentcontrols	concept:mediatype:white
concept:personus:ken_lewis	concept:subpartof	concept:book:america
concept:sportsteam:army_black_knights	concept:subpartoforganization	concept:sportsteam:ncaa_youth_kids
concept:city:team	concept:organizationhiredperson	concept:writer:brown
concept:personmexico:ncaa	concept:agentcontrols	concept:sportsteam:wright_state_raiders
concept:musician:agencies	concept:agentbelongstoorganization	concept:governmentorganization:department
concept:personmexico:ryan_whitney	concept:worksfor	concept:city:announcements
concept:coach:steve_spagnuolo	concept:worksfor	concept:city:st_louis
concept:celebrity:sam_adams	concept:agentbelongstoorganization	concept:politicsblog:portland
concept:sportsteam:arizona_cardinals_27_23	concept:organizationhiredperson	concept:coach:ken_whisenhunt
concept:stateorprovince:connecticut	concept:organizationterminatedperson	concept:coach:randy_edsall
concept:stateorprovince:wyoming	concept:subpartof	concept:country:usa
concept:company:ibm	concept:companyeconomicsector	concept:academicfield:consulting
concept:personmexico:ryan_whitney	concept:worksfor	concept:company:focus
concept:country:australia	concept:organizationhiredperson	concept:personaustralia:kevin_rudd
concept:university:usc	concept:organizationhiredperson	concept:coach:steve_spurrier
concept:city:resources	concept:agentcollaborateswithagent	concept:person:state
concept:dateliteral:n2006	concept:subpartof	concept:stateorprovince:texas
concept:country:liberia	concept:agentbelongstoorganization	concept:sportsleague:mls
concept:athlete:rick_pitino	concept:worksfor	concept:sportsteam:boston_celtics
concept:politician:clinton	concept:agentcollaborateswithagent	concept:politician:barack_hussein_obama
concept:personmexico:ryan_whitney	concept:worksfor	concept:nongovorganization:lawmakers
concept:company:charleston	concept:subpartof	concept:company:west_virginia
concept:televisionnetwork:cbs	concept:agentcollaborateswithagent	concept:journalist:dan_rather
concept:country:__america	concept:organizationterminatedperson	concept:scientist:no_
concept:ceo:andy_grove	concept:worksfor	concept:company:intel
concept:city:venice	concept:subpartof	concept:stateorprovince:california
concept:sportsteam:umass_lowell_river_hawks	concept:subpartoforganization	concept:sportsteam:ncaa_mens_midwest_regionals
concept:politician:jobs	concept:agentcontrols	concept:personus:steve_ballmer
concept:sportsteam:iowa_state	concept:subpartoforganization	concept:sportsteam:ncaa_youth_kids
concept:coach:bob_stoops	concept:worksfor	concept:stateorprovince:oklahoma
concept:company:north_carolina	concept:organizationhiredperson	concept:coach:john_bunting
concept:athlete:paul_brown	concept:worksfor	concept:sportsteam:eagles
concept:sportsteam:new_england_patriots	concept:organizationhiredperson	concept:person:belichick
concept:sportsteam:houston_cougars	concept:agentcollaborateswithagent	concept:personmexico:ncaa
concept:county:wilson	concept:subpartof	concept:creditunion:north_carolina
concept:city:louisville	concept:organizationhiredperson	concept:coach:steve_kragthorpe
concept:politicianus:rudy_giuliani	concept:agentcollaborateswithagent	concept:person:mccain
concept:televisionstation:jersey_city	concept:subpartof	concept:radiostation:new_jersey
concept:bank:viacom	concept:organizationterminatedperson	concept:ceo:sumner_redstone
concept:coach:alabama_crimson_tide	concept:agentbelongstoorganization	concept:sportsteam:ncaa_youth_kids
concept:musician:agencies	concept:agentbelongstoorganization	concept:governmentorganization:government
concept:televisionstation:kbjr_tv	concept:televisionstationaffiliatedwith	concept:televisionnetwork:nbc_universal
concept:personmexico:ncaa	concept:agentcontrols	concept:sportsteam:pittsburg_state_gorillas
concept:creditunion:kansas	concept:subpartoforganization	concept:sportsteam:ncaa_youth_kids
concept:country:region	concept:organizationterminatedperson	concept:scientist:no_
concept:stateorprovince:colorado	concept:organizationterminatedperson	concept:coach:dan_hawkins
concept:company:nbc	concept:agentcontrols	concept:televisionstation:whag
concept:person:jose_juan_barea	concept:worksfor	concept:sportsteam:chicago_bulls
concept:city:bush	concept:agentcollaborateswithagent	concept:politician:congress
concept:personmexico:ryan_whitney	concept:worksfor	concept:geopoliticallocation:agencies
concept:company:nebraska	concept:companyeconomicsector	concept:economicsector:insurance_coverage
concept:sportsteam:niagara_purple_eagles	concept:agentcollaborateswithagent	concept:personmexico:ncaa
concept:city:sweden	concept:agentbelongstoorganization	concept:sportsleague:mls
concept:transportation:stations	concept:subpartof	concept:weatherphenomenon:water
concept:stateorprovince:eu	concept:subpartof	concept:vehicle:countries
concept:company:nbc	concept:agentcontrols	concept:televisionstation:ksng
concept:sportsteam:texas_christian	concept:subpartoforganization	concept:sportsteam:ncaa_youth_kids
concept:person:michael002	concept:worksfor	concept:musicartist:times
concept:sportsleague:new	concept:organizationhiredperson	concept:coach:sean_payton
concept:person:president_bill_clinton	concept:agentcollaborateswithagent	concept:city:bush
concept:building:outlet	concept:subpartof	concept:weatherphenomenon:air
concept:sportsteam:oklahoma_state_cowboys	concept:agentcollaborateswithagent	concept:personmexico:ncaa
concept:sportsteam:grand_valley_state_lakers	concept:subpartoforganization	concept:sportsteam:ncaa_youth_kids
concept:vehicle:states	concept:subpartof	concept:country:southern_africa
concept:city:team	concept:organizationhiredperson	concept:coach:wade_phillips
concept:sportsteam:ucla	concept:subpartoforganization	concept:sportsteam:ncaa_youth_kids
concept:coach:steve_spurrier	concept:worksfor	concept:stateorprovince:south_carolina
concept:city:houston	concept:organizationhiredperson	concept:coach:art_briles
concept:blog:roger_ailes	concept:agentbelongstoorganization	concept:mountain:fox
concept:geopoliticallocation:agencies	concept:subpartoforganization	concept:governmentorganization:federal
concept:sportsteam:tulane_green_wave	concept:agentcollaborateswithagent	concept:personmexico:ncaa
concept:bank:viacom	concept:companyeconomicsector	concept:politicsissue:entertainment
concept:coach:bill_belichick	concept:worksfor	concept:sportsteam:cleveland_browns
concept:sportsteam:villanova_wildcats	concept:subpartoforganization	concept:sportsteam:ncaa_youth_kids
concept:company:nbc	concept:agentcontrols	concept:personus:david_gregory
concept:personaustralia:jobs	concept:worksfor	concept:company:disney
concept:company:clinton	concept:agentbelongstoorganization	concept:politicalparty:house
concept:university:uab	concept:organizationhiredperson	concept:person:davis
concept:city:sources	concept:subpartoforganization	concept:governmentorganization:department
concept:company:general_motors	concept:companyeconomicsector	concept:economicsector:automobile
concept:university:google	concept:agentcontrols	concept:city:number
concept:creditunion:kansas	concept:organizationhiredperson	concept:coach:mark_mangino
concept:museum:facilities	concept:subpartof	concept:book:electricity
concept:coach:vince_lombardi	concept:worksfor	concept:sportsteam:redskins
concept:coach:philip_fulmer	concept:worksfor	concept:newspaper:tennessee
concept:coach:new	concept:subpartof	concept:sportsleague:terms
concept:geopoliticalorganization:us_state	concept:agentcollaborateswithagent	concept:governmentorganization:house
concept:website:sydney_morning_herald	concept:agentcollaborateswithagent	concept:journalist:paul_sheehan
concept:sportsteam:nittany_lions	concept:subpartoforganization	concept:sportsteam:ncaa_mens_midwest_regionals
concept:coach:philip_fulmer	concept:worksfor	concept:sportsteam:vols
concept:city:tehran	concept:organizationhiredperson	concept:personmexico:ryan_whitney
concept:governmentorganization:government	concept:agentcontrols	concept:website:statistics
concept:book:new	concept:subpartof	concept:musicartist:town
concept:newspaper:financial_times	concept:headquarteredin	concept:city:london_city
concept:city:vancouver	concept:subpartof	concept:visualizablescene:washington
concept:coach:jim_haslett	concept:worksfor	concept:city:st_louis
concept:televisionstation:wdiv	concept:televisionstationaffiliatedwith	concept:televisionnetwork:nbc_universal
concept:person:state	concept:agentcollaborateswithagent	concept:company:services
concept:county:las_vegas	concept:subpartof	concept:traditionalgame:vegas
concept:sportsteam:liverpool_john_moores_university	concept:subpartoforganization	concept:sportsleague:fa
concept:televisionstation:wvtm_tv	concept:subpartof	concept:retailstore:nbc
concept:sportsteam:ball_state_university	concept:organizationhiredperson	concept:coach:brady_hoke
concept:university:oracle	concept:agentcontrols	concept:personus:larry_ellison
concept:terroristorganization:state	concept:agentcontrols	concept:website:resources
concept:personmexico:ncaa	concept:agentcontrols	concept:sportsteam:auburn_tigers
concept:city:tulare	concept:subpartof	concept:stateorprovince:california
concept:governmentorganization:epa	concept:organizationhiredperson	concept:personmexico:ryan_whitney
concept:male:world	concept:agentcollaborateswithagent	concept:person:mark001
concept:sportsleague:nfl	concept:agentcollaborateswithagent	concept:coach:baltimore_ravens
concept:automobilemaker:honda	concept:organizationterminatedperson	concept:ceo:takeo_fukui
concept:company:pixar	concept:agentcollaborateswithagent	concept:personaustralia:jobs
concept:website:wsls_tv	concept:subpartof	concept:retailstore:nbc
concept:sportsteam:arkansas_state_red_wolves	concept:subpartoforganization	concept:sportsteam:ncaa_youth_kids
concept:buildingfeature:organizations	concept:subpartof	concept:weatherphenomenon:air
concept:sportsteam:boston_celtics	concept:organizationhiredperson	concept:athlete:rick_pitino
concept:politician:jobs	concept:agentcontrols	concept:retailstore:itunes_store
concept:company:new_york	concept:agentcontrols	concept:mlconference:services_website
concept:personmexico:ncaa	concept:agentcontrols	concept:sportsteam:saint_louis_billikens
concept:televisionstation:wcau	concept:televisionstationaffiliatedwith	concept:televisionnetwork:nbc_universal
concept:city:experts	concept:subpartoforganization	concept:terroristorganization:state
concept:automobilemaker:chevrolet	concept:subpartoforganization	concept:company:general_motors001
concept:sportsteam:phillies	concept:agentcollaborateswithagent	concept:personus:shane_victorino
concept:coach:chicago_bulls	concept:agentbelongstoorganization	concept:sportsleague:nba
concept:vehicle:states	concept:subpartof	concept:airport:europe
concept:ceo:terry_semel	concept:topmemberoforganization	concept:company:yahoo001
concept:automobilemaker:chevrolet	concept:companyeconomicsector	concept:economicsector:auto
concept:male:world	concept:agentcontrols	concept:candy:john
concept:male:world	concept:agentcollaborateswithagent	concept:person:stephen
concept:coach:greg_robinson	concept:worksfor	concept:musicartist:orange
concept:programminglanguage:services	concept:subpartof	concept:visualizablething:effective_water
concept:company:north_carolina	concept:organizationhiredperson	concept:athlete:roy_williams
concept:university:purdue	concept:subpartoforganization	concept:sportsteam:ncaa_mens_midwest_regionals
concept:person:mccain	concept:agentcollaborateswithagent	concept:politicianus:mr__obama
concept:musicartist:journal	concept:agentcontrols	concept:company:business_week
concept:geopoliticallocation:agencies	concept:subpartoforganization	concept:politicalparty:federal_government
concept:city:berkeley	concept:subpartof	concept:stateorprovince:california
concept:personmexico:ncaa	concept:subpartof	concept:sportsteam:ncaa_youth_kids
concept:stateorprovince:south_carolina	concept:organizationhiredperson	concept:coach:steve_spurrier
concept:terroristorganization:state	concept:agentcontrols	concept:sport:initiatives
concept:coach:cincinnati_bengals	concept:agentbelongstoorganization	concept:sportsleague:nfl
concept:governmentorganization:agency	concept:subpartoforganization	concept:terroristorganization:state
concept:person:niklas_zennstr_m	concept:topmemberoforganization	concept:company:skype_com
concept:city:abc	concept:subpartoforganization	concept:company:disney
concept:sportsleague:syracuse	concept:organizationhiredperson	concept:coach:ben_schwartzwalder
concept:journalist:charles_osgood	concept:worksfor	concept:televisionnetwork:cbs
concept:blog:george_w__bush	concept:agentcontrols	concept:clothing:white
concept:politicsissue:programs	concept:subpartof	concept:weatherphenomenon:water
concept:personmexico:ncaa	concept:agentcontrols	concept:sportsteam:oregon_ducks
concept:city:denver	concept:organizationhiredperson	concept:politicianus:john_hickenlooper
concept:musicartist:journal	concept:agentcontrols	concept:company:bloomberg001
concept:sportsteam:western_illinois	concept:agentcollaborateswithagent	concept:personmexico:ncaa
concept:sportsteam:suns	concept:organizationhiredperson	concept:coach:mike_d_antoni
concept:city:deerfield_beach	concept:subpartof	concept:city:florida
concept:personmexico:ncaa	concept:agentcontrols	concept:sportsteam:new_mexico_state_aggies
concept:city:home	concept:agentbelongstoorganization	concept:stateorprovince:contact
concept:buildingfeature:systems	concept:subpartof	concept:visualizablething:basic_water
concept:company:north_carolina	concept:organizationhiredperson	concept:coach:matt_doherty
concept:company:nbc	concept:agentcontrols	concept:televisionstation:wmgt
concept:sportsteam:liverpool_university	concept:subpartoforganization	concept:sportsleague:fa
concept:nongovorganization:gop	concept:organizationhiredperson	concept:personmexico:ryan_whitney
concept:buildingfeature:systems	concept:subpartof	concept:visualizableattribute:two_water
concept:perceptionaction:cedar_rapids	concept:subpartof	concept:musicalbum:iowa
concept:city:chapel_hill	concept:subpartof	concept:creditunion:north_carolina
concept:city:area	concept:subpartof	concept:weatherphenomenon:air
concept:female:yankees	concept:agentcollaborateswithagent	concept:politicianus:austin_jackson
concept:sportsteam:duke_blue_devils	concept:agentcollaborateswithagent	concept:personmexico:ncaa
concept:televisionstation:wcnc_tv	concept:televisionstationaffiliatedwith	concept:televisionnetwork:nbc_universal
concept:sportsteam:florida_atlantic_owls	concept:subpartoforganization	concept:sportsteam:ncaa_youth_kids
concept:geopoliticallocation:agencies	concept:subpartoforganization	concept:nonprofitorganization:organizations
concept:sportsteam:suns	concept:agentcollaborateswithagent	concept:personmexico:jerry_colangelo
concept:person:andy_reid	concept:worksfor	concept:sportsteam:philadelphia_eagles
concept:biotechcompany:gateway_2000	concept:subpartoforganization	concept:company:acer_aspire
concept:politician:jobs	concept:agentcontrols	concept:automobilemaker:jeff_bezos
concept:person:andy_reid	concept:worksfor	concept:sportsteam:eagles
concept:televisionstation:weau_tv	concept:televisionstationaffiliatedwith	concept:televisionnetwork:nbc_universal
concept:politicianus:gov__sarah_palin	concept:agentcollaborateswithagent	concept:person:mccain
concept:sportsleague:nfl	concept:agentcollaborateswithagent	concept:coach:new_orleans_saints
concept:company:new_york	concept:organizationterminatedperson	concept:person:juan_carlos_osorio
concept:coach:philip_fulmer	concept:subpartof	concept:astronaut:vols
concept:buildingfeature:systems	concept:subpartof	concept:beverage:home_water
concept:governmentorganization:justice_department	concept:agentcontrols	concept:mediatype:white
concept:website:technorati	concept:organizationhiredperson	concept:ceo:david_sifry
concept:geopoliticallocation:grand_junction	concept:subpartof	concept:stateorprovince:colorado
concept:programminglanguage:system	concept:subpartof	concept:weatherphenomenon:water
concept:politician:obama	concept:agentcollaborateswithagent	concept:politicianus:hillary_clinton
concept:buildingfeature:service	concept:subpartof	concept:visualizablething:water_supply
concept:city:florida	concept:organizationhiredperson	concept:coach:ron_zook
concept:sportsteam:wichita_state	concept:subpartoforganization	concept:sportsteam:ncaa_youth_kids
concept:city:pictures	concept:subpartof	concept:weatherphenomenon:air
concept:buildingfeature:systems	concept:subpartof	concept:visualizableattribute:storm_water
concept:sportsteam:jaguars	concept:organizationhiredperson	concept:coach:tom_coughlin
concept:city:phoenix	concept:organizationhiredperson	concept:coach:terry_porter
concept:programminglanguage:services	concept:subpartof	concept:visualizableattribute:drinking_water
concept:sportsleague:syracuse	concept:subpartoforganization	concept:sportsteam:ncaa_youth_kids
concept:sportsteam:texans	concept:organizationhiredperson	concept:coach:gary_kubiak
concept:country:united_states	concept:organizationhiredperson	concept:personmexico:ryan_whitney
concept:musicartist:journal	concept:agentcontrols	concept:website:financial
concept:company:nbc	concept:agentcontrols	concept:website:witn_tv
concept:personmexico:ncaa	concept:agentcontrols	concept:sportsteam:rutgers_scarlet_knights
concept:governmentorganization:government	concept:agentcontrols	concept:vehicle:benefits
concept:company:nbc	concept:agentcontrols	concept:website:ksee
concept:coach:john_harbaugh	concept:worksfor	concept:sportsteam:ravens
concept:politicianus:rodham_clinton	concept:agentcollaborateswithagent	concept:person:bill
concept:university:kentucky	concept:organizationhiredperson	concept:coach:adolph_rupp
concept:terroristorganization:money	concept:agentbelongstoorganization	concept:politicalparty:federal_government
concept:coach:baltimore_ravens	concept:agentcontrols	concept:sportsleague:nfl
concept:county:brooklyn	concept:subpartof	concept:city:york
concept:politicsissue:programs	concept:subpartof	concept:visualizableattribute:various_water
concept:bathroomitem:firm	concept:subpartof	concept:weatherphenomenon:air
concept:personmexico:ncaa	concept:agentcontrols	concept:sportsteam:colorado_buffaloes
concept:coach:raymond_james_stadium	concept:subpartof	concept:city:tampa_bay
concept:country:party	concept:organizationhiredperson	concept:personus:party
concept:city:winchester	concept:subpartof	concept:stateorprovince:virginia
concept:radiostation:beaumont	concept:subpartof	concept:city:texas
concept:city:westminster	concept:subpartof	concept:stateorprovince:california
concept:journalist:thomas_friedman	concept:worksfor	concept:company:york_times
concept:sportsteam:charleston_cougars	concept:agentcollaborateswithagent	concept:personmexico:ncaa
concept:sportsteam:colts	concept:organizationhiredperson	concept:coach:jim_caldwell
concept:city:san_jose	concept:agentbelongstoorganization	concept:sportsleague:mls
concept:city:york	concept:subpartof	concept:stateorprovince:pennsylvania
concept:visualizablething:brockton	concept:subpartof	concept:beach:massachusetts
concept:bedroomitem:system	concept:subpartof	concept:transportation:full_air
concept:sportsteam:chicago_cubs	concept:agentcollaborateswithagent	concept:personmexico:carlos_fisher
concept:geopoliticallocation:bolton	concept:organizationhiredperson	concept:personmexico:ryan_whitney
concept:musicartist:times	concept:agentcollaborateswithagent	concept:bird:frank_rich
concept:city:bethlehem	concept:subpartof	concept:stateorprovince:pennsylvania
concept:bedroomitem:system	concept:subpartof	concept:kitchenitem:public_water
concept:county:detroit	concept:organizationhiredperson	concept:coach:michael_curry
concept:terroristorganization:state	concept:agentcontrols	concept:museum:technologies
concept:city:st_louis	concept:organizationhiredperson	concept:coach:jim_haslett
concept:terroristorganization:operation	concept:organizationhiredperson	concept:personmexico:ryan_whitney
concept:city:click	concept:subpartof	concept:weatherphenomenon:water
concept:buildingfeature:american	concept:subpartof	concept:county:york_city
concept:personafrica:jonathan_schwartz	concept:topmemberoforganization	concept:company:sun
concept:country:usa	concept:organizationhiredperson	concept:personaustralia:mike_krzyzewski
concept:personmexico:ncaa	concept:agentcontrols	concept:sportsteam:long_island_blackbirds
concept:sportsteam:tennessee_state_tigers	concept:agentcollaborateswithagent	concept:personmexico:ncaa
concept:televisionstation:ketk	concept:subpartof	concept:retailstore:nbc
concept:stateorprovince:wyoming	concept:organizationhiredperson	concept:personmexico:frank_robinson
concept:blog:manager	concept:subpartof	concept:weatherphenomenon:water
concept:buildingfeature:systems	concept:subpartof	concept:visualizablething:effective_water
concept:city:dallas	concept:organizationhiredperson	concept:coach:bill_walsh
concept:company:north_carolina	concept:organizationhiredperson	concept:coach:dean_smith
concept:sportsteam:western_carolina_catamounts	concept:subpartoforganization	concept:sportsteam:ncaa_youth_kids
concept:sportsleague:new	concept:organizationhiredperson	concept:coach:steve_spagnuolo
concept:room:schools	concept:subpartof	concept:weatherphenomenon:air
concept:nongovorganization:u_s_	concept:organizationterminatedperson	concept:scientist:no_
concept:sportsleague:terms	concept:organizationterminatedperson	concept:scientist:no_
concept:city:washington_d_c	concept:subpartoforganization	concept:sportsteam:ncaa_mens_midwest_regionals
concept:coach:nick_saban	concept:worksfor	concept:newspaper:alabama
concept:person:state	concept:agentcontrols	concept:visualizablething:measures
concept:retailstore:consumers	concept:subpartof	concept:weatherphenomenon:air
concept:blog:george_w__bush	concept:agentcollaborateswithagent	concept:geopoliticallocation:kerry
concept:geopoliticallocation:anderson	concept:subpartof	concept:stateorprovince:indiana
concept:sportsteam:coastal_carolina_chanticleers	concept:subpartoforganization	concept:sportsteam:ncaa_youth_kids
concept:website:inktomi	concept:subpartoforganization	concept:website:yahoo_mail
concept:city:service	concept:subpartof	concept:retailstore:aapl
concept:sportsteam:alabama_crimson_tide	concept:organizationhiredperson	concept:coach:nick_saban
concept:bank:iowa_state	concept:subpartoforganization	concept:sportsteam:ncaa_mens_midwest_regionals
concept:biotechcompany:gateway_2000	concept:organizationhiredperson	concept:ceo:ted_waitt
concept:governmentorganization:defense_department	concept:organizationhiredperson	concept:personmexico:ryan_whitney
concept:website:powerset	concept:subpartoforganization	concept:university:microsoft
concept:politicsblog:amazon_com	concept:organizationheadquarteredincity	concept:city:seattle
concept:person:spurrier	concept:worksfor	concept:sportsteam:redskins
concept:politicianus:hillary_rodham_clinton	concept:agentcollaborateswithagent	concept:politician:obama
concept:sportsteam:akron_zips	concept:agentcollaborateswithagent	concept:personmexico:ncaa
concept:company:nbc	concept:agentcontrols	concept:website:wmc
concept:sportsteam:buckeyes	concept:organizationhiredperson	concept:coach:tressel
concept:vehicle:research	concept:subpartof	concept:weatherphenomenon:air
concept:person:home001	concept:agentcollaborateswithagent	concept:stateorprovince:contact
concept:personmexico:ncaa	concept:agentcontrols	concept:sportsteam:siena_saints
concept:room:community	concept:subpartof	concept:hallwayitem:gas
concept:coach:jon_gruden	concept:worksfor	concept:sportsteam:buccaneers
concept:sportsteam:notre_dame	concept:subpartoforganization	concept:sportsteam:ncaa_youth_kids
concept:sportsteam:delaware_state_hornets	concept:subpartoforganization	concept:sportsteam:ncaa_youth_kids
concept:eventoutcome:rights	concept:subpartof	concept:weatherphenomenon:water
concept:sportsteam:elon_phoenix	concept:subpartoforganization	concept:sportsteam:ncaa_youth_kids
concept:company:nbc	concept:agentcontrols	concept:televisionstation:wdiv
concept:continent:europe	concept:organizationterminatedperson	concept:scientist:no_
concept:blog:iowa	concept:companyeconomicsector	concept:economicsector:insurance_coverage
concept:city:washington_d_c	concept:organizationhiredperson	concept:person:willingham
concept:company:arizona	concept:companyeconomicsector	concept:economicsector:insurance_coverage
concept:politician:david_brooks	concept:agentcollaborateswithagent	concept:musicartist:times
concept:male:dave_wannstedt	concept:worksfor	concept:city:pittsburgh
concept:politician:barack_hussein_obama	concept:agentcollaborateswithagent	concept:politician:clinton
concept:sportsteam:florida_state	concept:organizationhiredperson	concept:male:bobby_bowden
concept:musician:agencies	concept:agentcollaborateswithagent	concept:person:state
concept:company:acer_aspire	concept:subpartoforganization	concept:biotechcompany:gateway_2000
concept:city:hutchinson	concept:subpartof	concept:stateorprovince:kansas
concept:university:clemson	concept:organizationhiredperson	concept:athlete:frank_howard
concept:sportsteam:weber_state_wildcats	concept:agentcollaborateswithagent	concept:personmexico:ncaa
concept:buildingfeature:systems	concept:subpartof	concept:beverage:various_air
concept:company:disney	concept:acquired	concept:company:pixar
concept:county:baltimore	concept:organizationhiredperson	concept:coach:john_harbaugh
concept:personafrica:tom_brokaw	concept:subpartof	concept:retailstore:nbc
concept:person:wozniak	concept:worksfor	concept:company:apple002
concept:county:baltimore	concept:organizationhiredperson	concept:coach:harbaugh
concept:company:fox	concept:agentcollaborateswithagent	concept:journalist:greta_van_susteren
concept:radiostation:nevada	concept:companyeconomicsector	concept:economicsector:insurance
concept:personmexico:ncaa	concept:agentcontrols	concept:sportsteam:grambling_tigers
concept:city:bush	concept:agentcollaborateswithagent	concept:personnorthamerica:john_mccain
concept:sportsteam:eagles	concept:organizationhiredperson	concept:person:andy_reid
concept:sportsteam:bulldogs	concept:organizationhiredperson	concept:coach:dennis_felton
concept:coach:new	concept:subpartof	concept:mammal:australasia
concept:creditunion:michigan	concept:organizationhiredperson	concept:coach:tommy_amaker
concept:room:house	concept:subpartof	concept:beverage:tankless_water
concept:bone:ankle	concept:subpartof	concept:website:blood
concept:personmexico:ncaa	concept:agentcontrols	concept:sportsteam:northern_colorado_bears
concept:newspaper:texas	concept:companyeconomicsector	concept:economicsector:insurance
concept:sportsteam:utah_state	concept:agentcollaborateswithagent	concept:personmexico:ncaa
concept:city:baghdad	concept:organizationhiredperson	concept:personmexico:ryan_whitney
concept:automobilemaker:dallas_cowboys	concept:organizationhiredperson	concept:musician:jimmy_johnson
concept:person:state	concept:agentcontrols	concept:governmentorganization:regulatory_agencies
concept:company:nbc	concept:agentcontrols	concept:televisionstation:kalb_tv
concept:sportsleague:new	concept:organizationhiredperson	concept:coach:spagnuolo
concept:sportsteam:boston_terriers	concept:agentcollaborateswithagent	concept:personmexico:ncaa
concept:county:miami	concept:organizationhiredperson	concept:coach:nick_saban
concept:university:purdue	concept:subpartoforganization	concept:sportsteam:ncaa_youth_kids
concept:sportsteam:nevada_wolfpack	concept:organizationhiredperson	concept:coach:chuck_amato
concept:coach:bill_callahan	concept:worksfor	concept:university:raiders
concept:bank:administration	concept:agentbelongstoorganization	concept:governmentorganization:house
concept:biotechcompany:white	concept:agentbelongstoorganization	concept:city:washington_d_c
concept:sportsteam:ncaa_youth_kids	concept:agentcontrols	concept:celebrity:yale_bulldogs
concept:sportsteam:lsu_tigers	concept:agentcollaborateswithagent	concept:personmexico:ncaa
concept:tableitem:distributor	concept:subpartof	concept:weatherphenomenon:air
concept:transportation:network	concept:subpartof	concept:weatherphenomenon:water
concept:radiostation:newark	concept:subpartof	concept:university:ohio
concept:city:side	concept:agentcontrols	concept:stateorprovince:bruce
concept:county:san_francisco_state	concept:agentcontrols	concept:personus:danny_glover
concept:politician:jobs	concept:agentcontrols	concept:videogamesystem:ipod
concept:personmexico:ncaa	concept:agentcontrols	concept:sportsteam:california_golden_bears
concept:coach:new	concept:subpartof	concept:politicaloffice:office
concept:newspaper:business_journal	concept:organizationheadquarteredincity	concept:city:washington_d_c
concept:stateorprovince:georgia	concept:organizationhiredperson	concept:coach:vince_dooley
concept:weapon:laboratory	concept:subpartof	concept:weatherphenomenon:air
concept:sportsleague:nfl	concept:agentcollaborateswithagent	concept:coach:philadelphia_eagles
concept:sportsleague:nba	concept:agentcontrols	concept:coach:new_orleans_hornets
concept:programminglanguage:system	concept:subpartof	concept:chemical:flue_gas
concept:coach:carroll	concept:worksfor	concept:university:usc
concept:buildingfeature:systems	concept:subpartof	concept:visualizablething:low_cost_water
concept:museum:facilities	concept:subpartof	concept:lake:small_water
concept:politicalparty:democrats	concept:agentbelongstoorganization	concept:governmentorganization:house
concept:city:bush	concept:agentcollaborateswithagent	concept:governmentorganization:house
concept:city:uk	concept:organizationterminatedperson	concept:scientist:no_
concept:website:concord	concept:subpartof	concept:company:north_carolina
concept:company:clinton	concept:agentcollaborateswithagent	concept:person:bill
concept:city:pittsburgh	concept:organizationhiredperson	concept:coach:cowher
concept:company:west_virginia	concept:organizationhiredperson	concept:coach:bill_stewart
concept:geometricshape:landscape	concept:subpartof	concept:weatherphenomenon:water
concept:governmentorganization:u_s__senate	concept:subpartoforganization	concept:nongovorganization:u_s_
concept:sportsleague:nba	concept:subpartoforganization	concept:sportsteam:los_angeles_lakers
concept:female:yankees	concept:agentcollaborateswithagent	concept:personcanada:mike_mussina
concept:stateorprovince:author	concept:agentcollaborateswithagent	concept:male:world
concept:sportsteam:weber_state_wildcats	concept:subpartoforganization	concept:sportsteam:ncaa_youth_kids
concept:programminglanguage:system	concept:subpartof	concept:visualizablething:water_supply
concept:geopoliticallocation:world	concept:organizationterminatedperson	concept:personasia:number
concept:city:clinton	concept:organizationhiredperson	concept:personmexico:ryan_whitney
concept:stateorprovince:virginia	concept:subpartoforganization	concept:sportsteam:ncaa_youth_kids
concept:politician:jobs	concept:worksfor	concept:website:technology
concept:jobposition:superintendent	concept:subpartof	concept:weatherphenomenon:water
concept:person:larry_ellison	concept:agentcontrols	concept:perceptionaction:oracle_corporation
concept:company:north_carolina	concept:organizationterminatedperson	concept:scientist:no_
concept:stateorprovince:maharashtra	concept:subpartof	concept:country:republic_of_india
concept:company:post	concept:organizationheadquarteredincity	concept:county:los_angeles_county
concept:sportsteam:reds	concept:agentcontrols	concept:person:ken_griffey_jr
concept:sportsteam:florida_gators	concept:organizationhiredperson	concept:visualartist:meyer
concept:governmentorganization:u_s__department	concept:organizationhiredperson	concept:personmexico:ryan_whitney
concept:company:yahoo_inc_	concept:companyeconomicsector	concept:economicsector:internet
concept:personmexico:ncaa	concept:agentcontrols	concept:sportsteam:virginia_tech_hokies
concept:politician:jobs	concept:agentcontrols	concept:person:larry_ellison
concept:sportsteam:akron_pros	concept:organizationhiredperson	concept:coach:j_d__brookhart
concept:sportsteam:boston_college	concept:subpartoforganization	concept:sportsteam:ncaa_youth_kids
concept:company:general_motors	concept:organizationterminatedperson	concept:personus:roger_smith
concept:sportsteam:mississippi_rebels	concept:subpartoforganization	concept:sportsteam:ncaa_youth_kids
concept:male:world	concept:agentcontrols	concept:person:greg001
concept:personus:jann_wenner	concept:worksfor	concept:website:rolling_stone_magazine
concept:blog:google	concept:acquired	concept:company:applied_semantics
concept:coach:bill_stewart	concept:worksfor	concept:city:abc
concept:university:raiders	concept:organizationhiredperson	concept:actor:bill_callahan
concept:politicsissue:programs	concept:subpartof	concept:beverage:local_water
concept:room:house	concept:subpartof	concept:beverage:solar_water
concept:nonprofitorganization:operations	concept:organizationhiredperson	concept:personmexico:ryan_whitney
concept:personmexico:ncaa	concept:agentcontrols	concept:sportsteam:nevada_wolfpack
concept:politician:u_s__congress	concept:agentcollaborateswithagent	concept:city:bush
concept:coach:miami_dolphins	concept:agentbelongstoorganization	concept:sportsleague:nfl
concept:mldataset:groups	concept:subpartof	concept:weatherphenomenon:water
concept:company:nbc	concept:agentcontrols	concept:website:wbir_tv
concept:person:gore	concept:agentcollaborateswithagent	concept:politician:w__bush
concept:coach:new	concept:subpartof	concept:musicinstrument:resource
concept:terroristorganization:state	concept:agentcontrols	concept:profession:professionals
concept:company:new_york	concept:organizationhiredperson	concept:coach:eric_mangini
concept:personmexico:ncaa	concept:agentcontrols	concept:sportsteam:alabama_birmingham_blazers
concept:creditunion:wisconsin	concept:organizationterminatedperson	concept:scientist:no_
concept:book:years	concept:subpartof	concept:weatherphenomenon:air
concept:coach:frank_beamer	concept:worksfor	concept:county:virginia_tech
concept:university:butler	concept:subpartoforganization	concept:sportsteam:ncaa_youth_kids
concept:city:westminster	concept:subpartof	concept:stateorprovince:colorado
concept:city:wellington	concept:subpartof	concept:country:new_zealand
concept:televisionstation:wxii	concept:televisionstationaffiliatedwith	concept:televisionnetwork:nbc_universal
concept:ceo:john_o_shea	concept:topmemberoforganization	concept:blog:goal
concept:blog:myspace	concept:subpartoforganization	concept:company:news_corp_
concept:scientist:paypal	concept:agentcollaborateswithagent	concept:ceo:peter_thiel
concept:company:new_york	concept:organizationterminatedperson	concept:scientist:no_
concept:terroristorganization:state	concept:agentcontrols	concept:landscapefeatures:steps
concept:coach:ken_whisenhunt	concept:worksfor	concept:sportsteam:steelers
concept:county:san_diego	concept:organizationhiredperson	concept:coach:norv_turner
concept:sportsleague:new	concept:organizationhiredperson	concept:politician:schwartz
concept:programminglanguage:system	concept:subpartof	concept:visualizableattribute:proper_water
concept:newspaper:kgw_tv	concept:subpartof	concept:retailstore:nbc
concept:sportsteam:ncaa_youth_kids	concept:agentcontrols	concept:coach:stanford_cardinal
concept:sportsteam:packers	concept:organizationhiredperson	concept:coach:mike_holmgren
concept:stateorprovince:arkansas	concept:organizationhiredperson	concept:coach:bobby_petrino
concept:company:city_paper001	concept:organizationheadquarteredincity	concept:city:washington_d_c
concept:programminglanguage:system	concept:subpartof	concept:visualizablething:rainwater
concept:televisionnetwork:cbs	concept:agentcontrols	concept:televisionstation:wdtv
concept:judge:mr_	concept:agentcollaborateswithagent	concept:person:house
concept:sportsleague:nfl	concept:organizationhiredperson	concept:coach:cowher
concept:televisionstation:wluc	concept:subpartof	concept:retailstore:nbc
concept:stateorprovince:minnesota	concept:organizationhiredperson	concept:coach:dennis_green
concept:politicianus:joe_biden	concept:agentcollaborateswithagent	concept:politician:obama
concept:sportsteam:arizona_wildcats	concept:subpartoforganization	concept:sportsteam:ncaa_youth_kids
concept:county:new_london	concept:subpartof	concept:stateorprovince:connecticut
concept:sportsteam:kansas_city_chiefs	concept:organizationhiredperson	concept:coach:todd_haley
concept:politician:congress	concept:agentcollaborateswithagent	concept:city:bush
concept:person:home001	concept:agentbelongstoorganization	concept:politicalparty:college
concept:city:muncie	concept:subpartof	concept:stateorprovince:indiana
concept:city:kennewick	concept:subpartof	concept:city:washington_d_c
concept:website:ktal_tv	concept:subpartof	concept:retailstore:nbc
concept:programminglanguage:system	concept:subpartof	concept:beverage:industrial_air
concept:city:team	concept:agentcontrols	concept:museum:steve
concept:perceptionaction:davenport	concept:subpartof	concept:musicalbum:iowa
concept:radiostation:cleveland	concept:organizationhiredperson	concept:coach:eric_mangini
concept:person:jackson001	concept:agentcollaborateswithagent	concept:comedian:frank_melton
concept:politicsblog:amazon_com	concept:headquarteredin	concept:city:seattle
concept:geopoliticallocation:arms	concept:subpartof	concept:website:blood
concept:stateorprovince:colorado	concept:organizationterminatedperson	concept:coach:bill_mccartney
concept:sportsteam:red_sox	concept:organizationhiredperson	concept:personus:theo_epstein
concept:county:manhattan	concept:subpartof	concept:company:new_york
concept:coach:gene_chizik	concept:agentbelongstoorganization	concept:stateorprovince:auburn
concept:sportsteam:huskies	concept:organizationhiredperson	concept:personaustralia:jim_calhoun
concept:person:john003	concept:worksfor	concept:politicsblog:ny_times
concept:politicianus:fred_smith	concept:topmemberoforganization	concept:magazine:fedex
concept:sportsteam:oregon_state_beavers	concept:organizationhiredperson	concept:coach:mike_riley
concept:politicsblog:wlbz	concept:agentcollaborateswithagent	concept:company:nbc
concept:museum:facilities	concept:subpartof	concept:musicalbum:power
concept:person:mccain	concept:agentcollaborateswithagent	concept:writer:barak_obama
concept:city:louisville	concept:subpartoforganization	concept:sportsteam:ncaa_youth_kids
concept:website:ksaz_tv	concept:subpartof	concept:mountain:fox
concept:company:ap_001	concept:headquarteredin	concept:city:washington_d_c
concept:company:nbc	concept:agentcontrols	concept:televisionstation:knop_tv
concept:personmexico:ryan_whitney	concept:worksfor	concept:university:media
concept:transportation:concerns	concept:subpartof	concept:weatherphenomenon:air
concept:biotechcompany:fast	concept:companyeconomicsector	concept:economicsector:insurance
concept:city:somerville	concept:subpartof	concept:stateorprovince:massachusetts
concept:sportsleague:nba	concept:agentcontrols	concept:coach:new_jersey_nets
concept:programminglanguage:services	concept:subpartof	concept:beverage:efficient_water
concept:terroristorganization:state	concept:agentcontrols	concept:boardgame:board
concept:city:cottage	concept:subpartof	concept:weatherphenomenon:water
concept:coach:stanford_cardinal	concept:subpartof	concept:sportsteam:ncaa_youth_kids
concept:country:chile	concept:organizationhiredperson	concept:coach:marcelo_bielsa
concept:ceo:ted_waitt	concept:worksfor	concept:biotechcompany:gateway_2000
concept:coach:kansas_state	concept:agentcontrols	concept:coach:bill_snyder
concept:person:monroe	concept:subpartof	concept:creditunion:wisconsin
concept:city:port_arthur	concept:subpartof	concept:stateorprovince:texas
concept:sportsteam:oregon_state_beavers	concept:organizationhiredperson	concept:person:riley001
concept:city:hemet	concept:subpartof	concept:stateorprovince:california
concept:island:argentina	concept:subpartof	concept:room:mls
concept:city:washington_d_c	concept:subpartof	concept:musicalbum:us
concept:museum:facilities	concept:subpartof	concept:weatherphenomenon:water
concept:coach:gregg_popovich	concept:worksfor	concept:sportsteam:spurs
concept:politicsblog:tribune	concept:agentcontrols	concept:company:christian_science_monitor
concept:city:largo	concept:subpartof	concept:city:florida
concept:politician:jobs	concept:worksfor	concept:city:design
concept:director:jonathan_gold	concept:worksfor	concept:website:l_a__weekly
concept:blog:bill_o_reilly	concept:agentbelongstoorganization	concept:mountain:fox
concept:politician:jobs	concept:agentcontrols	concept:company:pixar
concept:sportsteam:ncaa_youth_kids	concept:agentcontrols	concept:coach:mississippi_state_bulldogs
concept:blog:today	concept:organizationhiredperson	concept:personmexico:ryan_whitney
concept:company:aol	concept:acquired	concept:company:advertising_com
concept:stateorprovince:oregon	concept:subpartoforganization	concept:sportsteam:ncaa_mens_midwest_regionals
concept:sociopolitical:independence	concept:subpartof	concept:company:missouri
concept:actor:chris_wallace	concept:worksfor	concept:mountain:fox
concept:university:auburn	concept:organizationhiredperson	concept:person:terry_bowden
concept:company:companies	concept:companyeconomicsector	concept:economicsector:insurance
concept:person:kevin	concept:agentbelongstoorganization	concept:recordlabel:friends
concept:city:jacksonville	concept:organizationhiredperson	concept:coach:jack_del_rio
concept:room:community	concept:subpartof	concept:room:plumbing
concept:company:aol_	concept:acquired	concept:website:netscape
concept:room:development	concept:subpartof	concept:politicsissue:energy
concept:personus:thomas_jefferson	concept:agentcollaborateswithagent	concept:city:bush
concept:company:nbc	concept:agentcontrols	concept:televisionstation:wsav_tv
concept:person:phil_jackson	concept:worksfor	concept:sportsteam:chicago_bulls
concept:person:republican	concept:agentcontrols	concept:coach:sarah_palin
concept:celebrity:yale_bulldogs	concept:agentcollaborateswithagent	concept:personmexico:ncaa
concept:politician:jobs	concept:agentcontrols	concept:person:macintosh
concept:politicianus:bill_clinton	concept:agentcollaborateswithagent	concept:politician:obama
concept:programminglanguage:system	concept:subpartof	concept:beverage:safe_water
concept:company:nbc	concept:agentcontrols	concept:politicsblog:wlbz
concept:sportsteam:boston_college	concept:organizationhiredperson	concept:person:al_skinner
concept:company:clinton	concept:agentcollaborateswithagent	concept:personus:john_edwards
concept:terroristorganization:state	concept:agentcontrols	concept:emotion:lands
concept:university:message	concept:organizationhiredperson	concept:personmexico:ryan_whitney
concept:newspaper:jane	concept:agentcollaborateswithagent	concept:male:world
concept:county:virginia_tech	concept:organizationhiredperson	concept:coach:frank_beamer
concept:sportsleague:nfl	concept:agentcontrols	concept:coach:san_francisco_49ers
concept:politicsblog:amazon_com	concept:companyeconomicsector	concept:economicsector:internet
concept:mountain:fox	concept:agentcontrols	concept:website:koki_tv
concept:sportsteam:bills	concept:organizationhiredperson	concept:coach:dick_jauron
concept:televisionstation:wwbt	concept:subpartof	concept:retailstore:nbc
concept:profession:installers	concept:subpartof	concept:weatherphenomenon:water
concept:company:nbc	concept:agentcontrols	concept:televisionstation:khas_tv
concept:stateorprovince:indiana	concept:organizationhiredperson	concept:coach:bobby_knight
concept:city:nebraska	concept:subpartof	concept:country:usa
concept:sportsteam:boise_state_broncos	concept:agentcollaborateswithagent	concept:personmexico:ncaa
concept:blog:google	concept:acquired	concept:website:pyra_labs
concept:county:columbus	concept:subpartof	concept:university:ohio
concept:politicianus:hillary_clinton	concept:agentcollaborateswithagent	concept:politician:obama
concept:university:iu	concept:organizationhiredperson	concept:personafrica:mike_davis
concept:coach:new	concept:subpartof	concept:director:summers
concept:county:miami	concept:subpartof	concept:city:florida
concept:televisionstation:kvbc	concept:televisionstationaffiliatedwith	concept:televisionnetwork:nbc_universal
concept:company:nbc	concept:agentcollaborateswithagent	concept:person:tim_russert
concept:terroristorganization:state	concept:agentcontrols	concept:profession:employees
concept:retailstore:lake_havasu_city	concept:subpartof	concept:beverage:arizona
concept:buildingfeature:systems	concept:subpartof	concept:beverage:conventional_water
concept:person:fred	concept:agentbelongstoorganization	concept:geopoliticallocation:world
concept:person:ron_meyer	concept:agentcollaborateswithagent	concept:female:universal_studios
concept:recordlabel:friends	concept:companyeconomicsector	concept:economicsector:insurance
concept:animal:head	concept:agentcollaborateswithagent	concept:person:davis
concept:televisionstation:wfla_tv	concept:televisionstationaffiliatedwith	concept:televisionnetwork:nbc_universal
concept:musician:agencies	concept:agentbelongstoorganization	concept:landscapefeatures:states
concept:jobposition:facility	concept:subpartof	concept:weatherphenomenon:water
concept:vehicle:services	concept:subpartof	concept:nongovorganization:u_s_
concept:programminglanguage:services	concept:subpartof	concept:visualizablething:wastewater
concept:website:new_york_times	concept:organizationhiredperson	concept:personmexico:ryan_whitney
concept:stateorprovince:general_motors	concept:agentcontrols	concept:hotel:roger_smith
concept:terroristorganization:state	concept:organizationhiredperson	concept:personmexico:ryan_whitney
concept:room:level	concept:subpartof	concept:weatherphenomenon:air
concept:sportsteam:vanderbilt_commodores	concept:subpartoforganization	concept:sportsteam:ncaa_youth_kids
concept:coach:hayden_fry	concept:worksfor	concept:blog:iowa
concept:city:resources	concept:subpartof	concept:river:state
concept:university:google	concept:agentcontrols	concept:programminglanguage:doubleclick
concept:governmentorganization:government	concept:agentcontrols	concept:personus:important_information
concept:website:feature	concept:subpartof	concept:weatherphenomenon:air
concept:programminglanguage:system	concept:subpartof	concept:beverage:tap_water
concept:sportsteam:appalachian_state_mo	concept:agentcollaborateswithagent	concept:personmexico:ncaa
concept:company:ebay001	concept:agentcontrols	concept:vehicle:skype
concept:biotechcompany:white	concept:agentbelongstoorganization	concept:bank:administration
concept:buildingfeature:systems	concept:subpartof	concept:book:electricity
concept:sportsteam:idaho_state_bengals	concept:agentcollaborateswithagent	concept:personmexico:ncaa
concept:vehicle:states	concept:subpartof	concept:trainstation:south_central
concept:sportsteam:niagara_purple_eagles	concept:subpartoforganization	concept:sportsteam:ncaa_youth_kids
concept:company:nbc	concept:agentcontrols	concept:televisionstation:ksan_tv
concept:sportsteam:steelers	concept:organizationhiredperson	concept:coach:cowher
concept:televisionstation:wtwc_tv	concept:televisionstationaffiliatedwith	concept:televisionnetwork:nbc_universal
concept:athlete:fred_smith	concept:worksfor	concept:magazine:fedex
concept:bodypart:art	concept:subpartof	concept:candy:york
concept:company:orbitz_worldwide	concept:companyeconomicsector	concept:economicsector:travel
concept:sportsteam:ncaa_youth_kids	concept:agentcontrols	concept:celebrity:seton_hall_pirates
concept:televisionstation:kris	concept:televisionstationaffiliatedwith	concept:televisionnetwork:nbc_universal
concept:sportsleague:mlb	concept:agentcontrols	concept:sport:nationals
concept:sportsteam:mary_hardin_baylor_crusaders	concept:organizationhiredperson	concept:coach:guy_morriss
concept:company:nbc	concept:agentcontrols	concept:company:kget001
concept:university:google	concept:organizationterminatedperson	concept:scientist:no_
concept:programminglanguage:state	concept:subpartof	concept:weatherphenomenon:air
concept:website:new_york_times	concept:companyeconomicsector	concept:academicfield:business
concept:coach:jim_boeheim	concept:worksfor	concept:website:syracuse
concept:sportsteam:colts	concept:organizationhiredperson	concept:coach:dungy
concept:university:mankato	concept:subpartof	concept:personnorthamerica:minnesota
concept:person:oklahoma_state	concept:agentbelongstoorganization	concept:sportsteam:ncaa_youth_kids
concept:politician:jobs	concept:topmemberoforganization	concept:biotechcompany:apple
concept:personmexico:ryan_whitney	concept:worksfor	concept:terroristorganization:operation
concept:personmexico:ncaa	concept:agentcontrols	concept:sportsteam:mississippi_rebels
concept:city:arkansas	concept:organizationhiredperson	concept:coach:petrino
concept:website:kdvr	concept:subpartof	concept:mountain:fox
concept:personus:paul_allen	concept:subpartof	concept:university:microsoft
concept:company:pixar	concept:headquarteredin	concept:city:emeryville
concept:sportsteam:sacramento_state	concept:agentcollaborateswithagent	concept:personmexico:ncaa
concept:politicianus:democratic_candidate_barack_obama	concept:agentcollaborateswithagent	concept:person:mccain
concept:museum:facilities	concept:subpartof	concept:beverage:local_water
concept:stateorprovince:tennessee	concept:organizationhiredperson	concept:coach:pat_summitt
concept:city:washington_d_c	concept:subpartof	concept:university:national
concept:sportsteam:kansas_state	concept:subpartof	concept:sportsteam:ncaa_youth_kids
concept:stateorprovince:oklahoma	concept:organizationhiredperson	concept:coach:barry_switzer
concept:university:kentucky	concept:organizationhiredperson	concept:personaustralia:tubby_smith
concept:book:new	concept:subpartof	concept:politicsissue:residents
concept:university:purdue	concept:organizationhiredperson	concept:personmexico:matt_painter
concept:sportsteam:emory_eagles	concept:subpartoforganization	concept:sportsteam:ncaa_youth_kids
concept:sportsteam:rams	concept:organizationhiredperson	concept:coach:steve_spagnuolo
concept:coach:rex_ryan	concept:agentbelongstoorganization	concept:sportsleague:new
concept:city:districts	concept:subpartoforganization	concept:terroristorganization:state
concept:radiostation:nevada	concept:subpartoforganization	concept:sportsteam:ncaa_youth_kids
concept:city:team	concept:agentcontrols	concept:clothing:white
concept:country:finland	concept:subpartof	concept:vehicle:countries
concept:hallwayitem:connection	concept:subpartof	concept:weatherphenomenon:water
concept:personus:ken_lewis	concept:worksfor	concept:country:__america
concept:blog:george_w__bush	concept:agentbelongstoorganization	concept:governmentorganization:house
concept:geopoliticallocation:option	concept:subpartof	concept:vehicle:air
concept:politician:jobs	concept:worksfor	concept:university:google
concept:company:hyperion_solutions	concept:subpartoforganization	concept:company:oracle
concept:personmexico:ryan_whitney	concept:worksfor	concept:governmentorganization:us_congress
concept:politicianus:nominee_barack_obama	concept:agentcollaborateswithagent	concept:person:mccain
concept:newspaper:tribune	concept:agentcollaborateswithagent	concept:ceo:sam_zell
concept:sportsequipment:officials	concept:subpartof	concept:weatherphenomenon:water
concept:mlconference:services_website	concept:subpartof	concept:city:texas
concept:politician:jobs	concept:agentcollaborateswithagent	concept:male:world
concept:city:home	concept:subpartof	concept:city:co
concept:coach:vince_lombardi	concept:worksfor	concept:sportsteam:packers
concept:company:west_virginia	concept:subpartoforganization	concept:sportsteam:ncaa_mens_midwest_regionals
concept:coach:new	concept:subpartof	concept:musicinstrument:blocks
concept:city:bush	concept:agentcollaborateswithagent	concept:politicianus:jimmy_carter
concept:city:abc	concept:subpartoforganization	concept:recordlabel:walt_disney
concept:landscapefeatures:camp	concept:subpartof	concept:weatherphenomenon:water
concept:musicartist:times	concept:agentcollaborateswithagent	concept:professor:david_pogue
concept:musician:jimmy_johnson	concept:worksfor	concept:automobilemaker:dallas_cowboys
concept:coach:new	concept:subpartof	concept:profession:division
concept:governmentorganization:united_states_congress	concept:organizationhiredperson	concept:personmexico:ryan_whitney
concept:coach:jeff_fisher	concept:worksfor	concept:sportsteam:titans
concept:female:yankees	concept:agentbelongstoorganization	concept:sportsleague:mlb
concept:university:kentucky	concept:organizationhiredperson	concept:coach:bill_curry
concept:personmexico:ncaa	concept:agentcontrols	concept:sportsteam:ohio_state_buckeyes
concept:university:villanova	concept:subpartoforganization	concept:sportsteam:ncaa_mens_midwest_regionals
concept:city:home	concept:subpartof	concept:transportation:central_air
concept:personmexico:ncaa	concept:agentcontrols	concept:sportsteam:pepperdine_waves
concept:sportsteam:dallas_mavericks	concept:organizationhiredperson	concept:personaustralia:avery_johnson
concept:radiostation:canton	concept:subpartof	concept:creditunion:michigan
concept:politician:w__bush	concept:agentcollaborateswithagent	concept:personnorthamerica:john_mccain
concept:stateorprovince:minnesota	concept:subpartof	concept:country:usa
concept:person:richard002	concept:agentcollaborateswithagent	concept:male:world
concept:politicsblog:tribune	concept:organizationheadquarteredincity	concept:city:washington_d_c
concept:sportsteam:pittsburgh_penguins	concept:organizationhiredperson	concept:coach:therrien
concept:musicartist:journal	concept:agentcontrols	concept:hotel:fortune
concept:stateorprovince:virginia	concept:organizationhiredperson	concept:professor:terry_holland
concept:sportsteam:colorado_buffaloes	concept:subpartoforganization	concept:sportsteam:ncaa_youth_kids
concept:website:inktomi	concept:subpartoforganization	concept:university:yahoo
concept:person:mccain	concept:agentcollaborateswithagent	concept:politicianus:presidential_candidate_barack_obama
concept:company:hp	concept:companyeconomicsector	concept:academicfield:information_technology
concept:city:petersburg	concept:subpartof	concept:stateorprovince:virginia
concept:company:west_virginia	concept:organizationhiredperson	concept:athlete:rich_rodriguez
concept:personmexico:ncaa	concept:agentcontrols	concept:sportsteam:penn_state_nittany_lions
concept:biotechcompany:apple	concept:agentcontrols	concept:island:steven
concept:televisionstation:kalamazoo	concept:subpartof	concept:creditunion:michigan
concept:mlalgorithm:solutions	concept:subpartof	concept:weatherphenomenon:water
concept:sportsteam:bowling_green_falcons	concept:subpartoforganization	concept:sportsteam:ncaa_youth_kids
concept:person:jackson001	concept:worksfor	concept:sportsteam:chicago_bulls
concept:stateorprovince:indiana	concept:agentcontrols	concept:personafrica:mike_davis
concept:stateorprovince:mississippi	concept:organizationhiredperson	concept:personafrica:andy_kennedy
concept:personmexico:ncaa	concept:agentcontrols	concept:sportsteam:colorado_state_rams
concept:company:intel	concept:acquired	concept:company:sarvega
concept:personaustralia:jobs	concept:worksfor	concept:publication:macworld
concept:website:amazon	concept:headquarteredin	concept:city:seattle
concept:bedroomitem:new	concept:subpartof	concept:book:years
concept:company:nbc	concept:agentcontrols	concept:televisionstation:wmaq
concept:stateorprovince:decision	concept:organizationhiredperson	concept:personmexico:ryan_whitney
concept:sportsteam:falcons	concept:organizationhiredperson	concept:coach:petrino
concept:politicsblog:kpnx_tv	concept:agentcollaborateswithagent	concept:company:nbc
concept:city:announcements	concept:organizationhiredperson	concept:personmexico:ryan_whitney
concept:sportsteam:new_york_jets	concept:organizationhiredperson	concept:person:edwards
concept:coach:carolina_panthers	concept:agentbelongstoorganization	concept:sportsleague:nfl
concept:person:john003	concept:worksfor	concept:company:the_new_york_times001
concept:building:glendale	concept:subpartof	concept:beverage:arizona
concept:governmentorganization:senators	concept:organizationhiredperson	concept:personmexico:ryan_whitney
concept:coach:philip_fulmer	concept:worksfor	concept:stateorprovince:volunteer
concept:ceo:sumner_redstone	concept:topmemberoforganization	concept:bank:viacom
concept:coach:jagodzinski	concept:worksfor	concept:sportsteam:boston_college
concept:buildingfeature:systems	concept:subpartof	concept:visualizableattribute:elaborate_water
concept:tradeunion:congress	concept:agentcontrols	concept:emotion:money
concept:sportsteam:boston_terriers	concept:subpartoforganization	concept:sportsteam:ncaa_youth_kids
concept:buildingfeature:systems	concept:subpartof	concept:visualizableattribute:building_water
concept:company:west_virginia	concept:subpartoforganization	concept:sportsteam:ncaa_youth_kids
concept:company:nbc	concept:agentcontrols	concept:televisionstation:ksnt_tv
concept:stateorprovince:mississippi_state	concept:subpartoforganization	concept:sportsteam:ncaa_mens_midwest_regionals
concept:country:west_indies	concept:organizationhiredperson	concept:personmexico:ryan_whitney
concept:geometricshape:queens	concept:subpartof	concept:company:new_york
concept:sportsteam:cleveland_state_vikings	concept:subpartoforganization	concept:sportsteam:ncaa_youth_kids
concept:personmexico:ncaa	concept:agentcontrols	concept:sportsteam:columbia_lions
concept:ceo:takeo_fukui	concept:topmemberoforganization	concept:automobilemaker:honda
concept:university:uga	concept:organizationhiredperson	concept:coach:richt
concept:televisionstation:kiem_tv	concept:subpartoforganization	concept:televisionnetwork:nbc_universal
concept:athlete:rockies	concept:subpartof	concept:sportsleague:mlb
concept:televisionstation:wtwo	concept:subpartof	concept:retailstore:nbc
concept:person:pat_riley	concept:worksfor	concept:sportsteam:heat
concept:sportsteam:redskins	concept:organizationhiredperson	concept:coach:steve_spurrier
concept:politicianus:john_f__kennedy	concept:agentbelongstoorganization	concept:politicalparty:house
concept:biotechcompany:white	concept:agentcollaborateswithagent	concept:city:team
concept:coach:bill_belichick	concept:worksfor	concept:sportsteam:new_england_patriots
concept:university:microsoft	concept:agentcontrols	concept:company:yahoo001
concept:sportsteam:georgetown_hoyas	concept:subpartoforganization	concept:sportsteam:ncaa_youth_kids
concept:coach:new	concept:subpartof	concept:sportsteam:uk
concept:newspaper:journal	concept:agentcontrols	concept:city:london_city
concept:musician:agencies	concept:agentbelongstoorganization	concept:terroristorganization:state
concept:city:texas	concept:subpartoforganization	concept:sportsteam:ncaa_youth_kids
concept:company:intel	concept:acquired	concept:company:dialogic
concept:city:home	concept:subpartof	concept:website:google_s
concept:skiarea:farmington	concept:subpartof	concept:county:new_mexico
concept:university:france_telecom	concept:subpartoforganization	concept:biotechcompany:orange
concept:personmexico:ncaa	concept:agentcontrols	concept:sportsteam:syracuse_orangemen
concept:company:sun_microsystems001	concept:agentcollaborateswithagent	concept:ceo:scott_mcnealy
concept:city:jacksonville	concept:organizationterminatedperson	concept:actor:jack_del_rio
concept:blog:linkedin	concept:companyeconomicsector	concept:economicsector:social_networking
concept:televisionnetwork:cbs	concept:subpartoforganization	concept:bank:viacom
concept:sportsteam:chicago_bulls	concept:organizationhiredperson	concept:person:jackson001
concept:politicsblog:journal	concept:organizationheadquarteredincity	concept:city:washington_d_c
concept:coach:bob_bradley	concept:worksfor	concept:nongovorganization:u_s_
concept:athlete:boston_red_sox	concept:agentbelongstoorganization	concept:sportsleague:mlb
concept:governmentorganization:government	concept:agentcontrols	concept:currency:territories
concept:person:don_shula	concept:worksfor	concept:sportsteam:miami_dolphins
concept:country:egypt	concept:organizationterminatedperson	concept:person:yehia_kazarian
concept:ceo:reid_hoffman	concept:agentcontrols	concept:agriculturalproduct:linkedin
concept:personmexico:ncaa	concept:agentcontrols	concept:sportsteam:eastern_illinois_panthers
concept:sportsteam:nebraska_cornhuskers	concept:agentcollaborateswithagent	concept:personmexico:ncaa
concept:sportsteam:butler_bulldogs	concept:agentcollaborateswithagent	concept:personmexico:ncaa
concept:company:fox	concept:agentcollaborateswithagent	concept:journalist:shepard_smith
concept:person:michael002	concept:agentcontrols	concept:charactertrait:world
concept:city:gilbert	concept:subpartof	concept:beverage:arizona
concept:politician:obama	concept:agentcollaborateswithagent	concept:politicianus:george_w__bush
concept:professor:david_pogue	concept:worksfor	concept:company:nyt
concept:company:general_motors001	concept:headquarteredin	concept:city:detroit
concept:personmexico:ncaa	concept:agentcontrols	concept:sportsteam:southeast_missouri_state_redhawks
concept:televisionnetwork:cbs	concept:agentcontrols	concept:televisionstation:wsaw
concept:company:nbc	concept:agentcontrols	concept:website:wrex_tv
concept:company:disney	concept:acquired	concept:website:infoseek
concept:university:purdue	concept:organizationhiredperson	concept:coach:danny_hope
concept:city:fresno	concept:organizationhiredperson	concept:politician:ashley_swearengin
concept:city:uk	concept:organizationhiredperson	concept:personaustralia:tubby_smith
concept:personus:john_edwards	concept:agentcollaborateswithagent	concept:geopoliticallocation:kerry
concept:person:kevin	concept:agentcollaborateswithagent	concept:male:world
concept:governmentorganization:government	concept:agentcontrols	concept:emotion:land
concept:musicartist:journal	concept:agentcontrols	concept:city:l_a_
concept:sportsteam:ohio_state_buckeyes	concept:agentcollaborateswithagent	concept:personmexico:ncaa
concept:city:bloomington	concept:subpartof	concept:stateorprovince:indiana
concept:nonprofitorganization:organizations	concept:organizationhiredperson	concept:personus:party
concept:person:tony_snow	concept:worksfor	concept:mountain:fox
concept:company:ebay001	concept:organizationheadquarteredincity	concept:city:san_jose
concept:bedroomitem:new	concept:subpartof	concept:musicalbum:seasons
concept:sportsteam:gonzaga_bulldogs	concept:subpartoforganization	concept:sportsteam:ncaa_youth_kids
concept:sportsteam:bucks	concept:organizationhiredperson	concept:person:jose_juan_barea
concept:personmexico:ncaa	concept:agentcontrols	concept:sportsteam:james_madison_dukes
concept:city:hendersonville	concept:subpartof	concept:stateorprovince:tennessee
concept:stateorprovince:georgia	concept:subpartoforganization	concept:sportsteam:ncaa_youth_kids
concept:company:google_inc	concept:acquired	concept:website:youtube
concept:website:wbir_tv	concept:subpartof	concept:retailstore:nbc
concept:person:mccain	concept:agentbelongstoorganization	concept:politicalparty:house
concept:sportsteam:penn_state_nittany_lions	concept:subpartoforganization	concept:sportsteam:ncaa_youth_kids
concept:buildingfeature:organizations	concept:subpartof	concept:weatherphenomenon:water
concept:automobilemaker:jeff_bezos	concept:subpartof	concept:website:amazon
concept:city:cookeville	concept:subpartof	concept:weatherphenomenon:tennessee
concept:politicsblog:wis	concept:subpartof	concept:retailstore:nbc
concept:personmexico:ncaa	concept:agentcontrols	concept:sportsteam:miami_hurricanes
concept:writer:barak_obama	concept:agentcollaborateswithagent	concept:company:clinton
concept:coach:skip_holtz	concept:worksfor	concept:sportsteam:pirates
concept:mountain:fox	concept:agentcollaborateswithagent	concept:blog:bill_o_reilly
concept:buildingfeature:service	concept:subpartof	concept:visualizableattribute:drinking_water
concept:company:missouri	concept:organizationhiredperson	concept:personaustralia:gary_pinkel
concept:sportsleague:new	concept:organizationhiredperson	concept:coach:gene_chizik
concept:buildingfeature:material	concept:subpartof	concept:weatherphenomenon:air
concept:geopoliticallocation:world	concept:organizationhiredperson	concept:personmexico:ryan_whitney
concept:televisionstation:wwbt	concept:televisionstationaffiliatedwith	concept:televisionnetwork:nbc_universal
concept:female:hilary	concept:agentcollaborateswithagent	concept:person:mccain
concept:sportsteam:bengals	concept:subpartoforganization	concept:sportsleague:nfl
concept:televisionstation:kark_tv	concept:subpartof	concept:retailstore:nbc
concept:nongovorganization:u_s_	concept:organizationhiredperson	concept:coach:greg_ryan
concept:company:japan	concept:organizationterminatedperson	concept:scientist:no_
concept:televisionstation:kobi	concept:subpartoforganization	concept:televisionnetwork:nbc_universal
concept:county:manhattan	concept:subpartof	concept:creditunion:kansas
concept:city:cape_coral	concept:subpartof	concept:city:florida
concept:buildingfeature:systems	concept:subpartof	concept:visualizableattribute:on_site_water
concept:sportsleague:nba	concept:organizationhiredperson	concept:athlete:john_lucas
concept:coach:douglas_edwards	concept:agentbelongstoorganization	concept:televisionnetwork:cbs
concept:televisionstation:ktvz_tv	concept:subpartoforganization	concept:televisionnetwork:nbc_universal
concept:sportsteam:wisconsin_green_bay_phoenix	concept:subpartoforganization	concept:sportsteam:ncaa_youth_kids
concept:sportsteam:notre_dame	concept:organizationhiredperson	concept:person:ty_willingham
concept:coach:kay_yow	concept:worksfor	concept:sportsteam:nc_state
concept:building:outlet	concept:subpartof	concept:weatherphenomenon:water
concept:university:nebraska	concept:organizationhiredperson	concept:coach:tom_osborne
concept:sportsteam:ncaa_youth_kids	concept:agentcontrols	concept:celebrity:northwestern_wildcats
concept:sportsteam:xavier_musketeers	concept:agentcollaborateswithagent	concept:personmexico:ncaa
concept:city:louisville	concept:organizationhiredperson	concept:coach:petrino
concept:country:australia	concept:organizationterminatedperson	concept:coach:hiddink
concept:visualizablething:use	concept:subpartof	concept:book:terms
concept:newspaper:wics_tv	concept:subpartof	concept:retailstore:nbc
concept:sportsteam:oregon_ducks	concept:subpartoforganization	concept:sportsteam:ncaa_youth_kids
concept:coach:tressel	concept:worksfor	concept:sportsteam:ohio_state_university
concept:city:orange	concept:organizationhiredperson	concept:visualizablescene:robinson
concept:museum:facilities	concept:subpartof	concept:visualizableattribute:community_water
concept:newspaper:new_hampshire	concept:companyeconomicsector	concept:economicsector:insurance_coverage
concept:sportsteam:sacred_heart_pioneers	concept:subpartoforganization	concept:sportsteam:ncaa_youth_kids
concept:personus:steve_ballmer	concept:agentcontrols	concept:retailstore:microsoft
concept:city:capital	concept:organizationhiredperson	concept:personmexico:ryan_whitney
concept:geopoliticallocation:agencies	concept:subpartoforganization	concept:sportsteam:universities
concept:buildingfeature:systems	concept:subpartof	concept:visualizableattribute:potable_water
concept:university:alabama	concept:organizationhiredperson	concept:coach:bear_bryant
concept:coach:new	concept:subpartof	concept:musicinstrument:asia
concept:buildingfeature:home	concept:subpartof	concept:weatherphenomenon:cold_air
concept:televisionstation:wptz	concept:televisionstationaffiliatedwith	concept:televisionnetwork:nbc_universal
concept:company:nbc	concept:agentcontrols	concept:website:wnwo_tv
concept:city:buckeye	concept:organizationhiredperson	concept:coach:tressel
concept:company:sun_microsystems001	concept:companyeconomicsector	concept:economicsector:computer
concept:company:nbc	concept:agentcontrols	concept:televisionstation:wnyt_tv
concept:company:nbc	concept:agentcontrols	concept:televisionstation:kcfw_tv
concept:televisionnetwork:cbs	concept:agentcollaborateswithagent	concept:journalist:bill_plante
concept:company:hp	concept:organizationheadquarteredincity	concept:city:palo_alto
concept:city:tampa_bay	concept:organizationhiredperson	concept:athlete:john_tortorella
concept:governmentorganization:workers	concept:organizationhiredperson	concept:personmexico:ryan_whitney
concept:radiostation:topeka	concept:subpartof	concept:creditunion:kansas
concept:nongovorganization:u_s_	concept:agentcollaborateswithagent	concept:politicianus:palin
concept:company:spirit	concept:headquarteredin	concept:city:fort_lauderdale
concept:televisionnetwork:cbs	concept:agentcontrols	concept:televisionstation:wkyt
concept:personmexico:ncaa	concept:agentcontrols	concept:sportsteam:indiana_state_sycamores
concept:vehicle:states	concept:subpartof	concept:room:community
concept:county:columbus	concept:subpartof	concept:stateorprovince:georgia
concept:mountain:fox	concept:agentcontrols	concept:website:waws_tv
concept:country:vatican	concept:organizationhiredperson	concept:personmexico:ryan_whitney
concept:actor:scott_mcnealy	concept:worksfor	concept:blog:sun
concept:personmexico:ncaa	concept:agentcontrols	concept:sportsteam:baylor_bears
concept:sportsteam:east_tennessee_state_buccaneers	concept:subpartoforganization	concept:sportsteam:ncaa_youth_kids
concept:politicianus:richard_riordan	concept:worksfor	concept:company:los_angeles
concept:personmexico:ncaa	concept:agentcontrols	concept:sportsteam:texas_state_bobcats
concept:person:mccain	concept:agentcollaborateswithagent	concept:politician:w__bush
concept:televisionstation:wdsu_tv	concept:subpartof	concept:retailstore:nbc
concept:personmexico:ncaa	concept:agentcontrols	concept:sportsteam:grand_valley_state_lakers
concept:coach:sparano	concept:worksfor	concept:sportsleague:new
concept:televisionstation:kmoh	concept:subpartoforganization	concept:televisionnetwork:nbc_universal
concept:televisionstation:kkco	concept:subpartof	concept:retailstore:nbc
concept:room:area	concept:subpartof	concept:politicsissue:energy
concept:company:nbc	concept:agentcontrols	concept:televisionstation:wise
concept:museum:facilities	concept:subpartof	concept:beverage:available_water
concept:company:nbc	concept:agentcontrols	concept:televisionstation:ktuu
concept:creditunion:michigan	concept:organizationhiredperson	concept:coach:beilein
concept:coach:new_york_giants	concept:agentcontrols	concept:sportsleague:nfl
concept:city:texas	concept:agentcollaborateswithagent	concept:city:service
concept:governmentorganization:amazon_com	concept:agentcollaborateswithagent	concept:ceo:jeff_bezos
concept:sportsteam:northern_arizona_lumberjacks	concept:subpartoforganization	concept:sportsteam:ncaa_youth_kids
concept:geopoliticallocation:authorities	concept:subpartof	concept:beverage:local_water
concept:company:nbc	concept:agentcontrols	concept:televisionstation:wptz
concept:geopoliticallocation:air_conditioning	concept:subpartof	concept:university:central
concept:sportsteam:los_angeles_lakers	concept:organizationhiredperson	concept:person:jackson001
concept:city:nj	concept:subpartof	concept:country:usa
concept:company:nbc	concept:agentcontrols	concept:televisionstation:weau_tv
concept:sportsteam:former_san_francisco_giants	concept:agentcollaborateswithagent	concept:athlete:bonds
concept:sportsteam:rams	concept:organizationterminatedperson	concept:coach:rich_brooks
concept:politicalparty:house	concept:organizationhiredperson	concept:personus:democratic
concept:sportsteam:knicks	concept:organizationhiredperson	concept:person:pat_riley
concept:company:disney	concept:acquired	concept:publication:espn
concept:blog:google	concept:acquired	concept:company:postini
concept:coach:tomlin	concept:worksfor	concept:sportsteam:steelers
concept:city:home	concept:subpartof	concept:book:electricity
concept:company:yahoo001	concept:acquired	concept:website:kelkoo
concept:city:richmond	concept:subpartof	concept:stateorprovince:california
concept:personnorthamerica:john_mccain	concept:agentcollaborateswithagent	concept:politician:clinton
concept:book:new	concept:subpartof	concept:programminglanguage:state
concept:visualizablescene:robinson	concept:worksfor	concept:website:syracuse
concept:politician:michael_nutter	concept:worksfor	concept:county:philadelphia
concept:personmexico:ncaa	concept:agentcontrols	concept:sportsteam:uc_irvine_anteaters
concept:personmexico:ryan_whitney	concept:worksfor	concept:governmentorganization:representatives
concept:televisionstation:kndu	concept:televisionstationaffiliatedwith	concept:televisionnetwork:nbc_universal
concept:company:doubleclick	concept:companyeconomicsector	concept:economicsector:online_advertising
concept:coach:dennis_green	concept:worksfor	concept:sportsteam:minnesota_vikings
concept:criminal:baton_rouge	concept:subpartof	concept:musicsong:louisiana
concept:county:newton	concept:subpartof	concept:creditunion:iowa
concept:person:monroe	concept:subpartof	concept:company:north_carolina
concept:sportsteam:arizona_cardinals_27_23	concept:organizationhiredperson	concept:coach:todd_haley
concept:sportsteam:sacramento_state	concept:subpartoforganization	concept:sportsteam:ncaa_youth_kids
concept:sport:peoria	concept:subpartof	concept:beverage:arizona
concept:sportsteam:colorado_avalanche	concept:organizationhiredperson	concept:coach:joel_quenneville
concept:company:nbc	concept:agentcontrols	concept:website:walb_tv
concept:company:reuters	concept:agentcollaborateswithagent	concept:journalist:jon_decker
concept:coach:jim_caldwell	concept:worksfor	concept:sportsteam:colts
concept:company:north_carolina	concept:organizationhiredperson	concept:professor:anson_dorrance
concept:city:pittsfield	concept:subpartof	concept:beach:massachusetts
concept:county:detroit	concept:organizationhiredperson	concept:coach:rod_marinelli
concept:sportsteam:philadelphia_eagles	concept:organizationhiredperson	concept:athlete:paul_brown
concept:coach:sparano	concept:worksfor	concept:musicartist:season
concept:sportsteam:george_washington_colonials	concept:subpartoforganization	concept:sportsteam:ncaa_youth_kids
concept:animal:head	concept:agentcontrols	concept:person:davis
concept:programminglanguage:services	concept:subpartof	concept:beverage:improved_water
concept:coach:steve_spurrier	concept:worksfor	concept:university:usc
concept:biotechcompany:white	concept:agentbelongstoorganization	concept:governmentorganization:house
concept:governmentorganization:rule	concept:subpartoforganization	concept:terroristorganization:state
concept:city:boston	concept:subpartoforganization	concept:sportsleague:nba
concept:city:phoenix	concept:organizationhiredperson	concept:politician:phil_gordon
concept:visualizablething:residence	concept:subpartof	concept:weatherphenomenon:air
concept:televisionstation:wcyb_tv	concept:subpartoforganization	concept:televisionnetwork:nbc_universal
concept:website:issue	concept:subpartof	concept:weatherphenomenon:air
concept:personmexico:ncaa	concept:agentcontrols	concept:sportsteam:florida_state_seminoles
concept:sportsteam:ball_state_university	concept:agentcollaborateswithagent	concept:coach:stan_parrish
concept:sportsteam:buffalo_sabres	concept:organizationhiredperson	concept:coach:lindy_ruff
concept:coach:kentucky	concept:subpartof	concept:sportsteam:ncaa_mens_midwest_regionals
concept:sportsteam:oklahoma_state_cowboys	concept:subpartoforganization	concept:sportsteam:ncaa_youth_kids
concept:island:investment	concept:subpartof	concept:weatherphenomenon:water
concept:room:homes	concept:subpartof	concept:weatherphenomenon:water
concept:journalist:bob_schieffer	concept:worksfor	concept:televisionnetwork:cbs
concept:personmexico:ncaa	concept:agentcontrols	concept:sportsteam:cleveland_state_vikings
concept:city:texas	concept:organizationhiredperson	concept:coach:rick_barnes
concept:company:general_motors001	concept:organizationterminatedperson	concept:ceo:fritz_henderson
concept:publication:wsaz_tv	concept:subpartof	concept:retailstore:nbc
concept:sportsleague:western_conference	concept:agentcontrols	concept:sportsteam:la_clippers
concept:politicianus:dick_cheney	concept:agentbelongstoorganization	concept:politicalparty:house
concept:televisionstation:wise_tv	concept:televisionstationaffiliatedwith	concept:televisionnetwork:nbc_universal
concept:governmentorganization:government	concept:agentcontrols	concept:vehicle:research
concept:sportsteam:red_wings	concept:organizationhiredperson	concept:personmexico:scotty_bowman
concept:profession:managers	concept:subpartof	concept:weatherphenomenon:water
concept:musicartist:policy	concept:agentcontrols	concept:clothing:white
concept:televisionstation:wdtv	concept:agentcollaborateswithagent	concept:televisionnetwork:cbs
concept:county:oakland	concept:organizationhiredperson	concept:person:lane_kiffin
concept:sportsteam:seminoles	concept:organizationhiredperson	concept:male:bobby_bowden
concept:recordlabel:friends	concept:organizationhiredperson	concept:personmexico:ryan_whitney
concept:stateorprovince:minnesota	concept:organizationhiredperson	concept:personaustralia:tubby_smith
concept:politicianus:john_kennedy	concept:agentcontrols	concept:conference:ifpi
concept:coach:new_orleans_saints	concept:agentbelongstoorganization	concept:sportsleague:nfl
concept:televisionstation:wtmj_tv	concept:subpartof	concept:retailstore:nbc
concept:website:wnwo_tv	concept:subpartof	concept:retailstore:nbc
concept:city:bush	concept:agentbelongstoorganization	concept:politicalparty:house
concept:politicsblog:geraldo_rivera	concept:agentbelongstoorganization	concept:mountain:fox
concept:city:syracuse	concept:organizationhiredperson	concept:visualizablescene:robinson
concept:personmexico:ncaa	concept:agentcontrols	concept:sportsteam:elon_phoenix
concept:comedian:oklahoma	concept:agentcollaborateswithagent	concept:coach:bob_stoops
concept:personmexico:ncaa	concept:agentcontrols	concept:sportsteam:unc_asheville_bulldogs
concept:politician:john_peyton	concept:worksfor	concept:city:jacksonville
concept:company:north_carolina	concept:companyeconomicsector	concept:economicsector:insurance
concept:sportsteam:alabama_crimson_tide	concept:subpartoforganization	concept:sportsteam:ncaa_mens_midwest_regionals
concept:televisionstation:wicd	concept:subpartoforganization	concept:televisionnetwork:nbc_universal
concept:city:louisiana	concept:subpartof	concept:country:usa
concept:sportsteam:uc_irvine_anteaters	concept:subpartoforganization	concept:sportsteam:ncaa_youth_kids
concept:museum:facilities	concept:subpartof	concept:profession:sewers
concept:governmentorganization:capitol	concept:agentcontrols	concept:mediatype:white
concept:profession:professionals	concept:subpartof	concept:weatherphenomenon:air
concept:coach:philip_fulmer	concept:subpartof	concept:retailstore:ut
concept:personus:jobs	concept:worksfor	concept:website:technology
concept:personmexico:ryan_whitney	concept:worksfor	concept:geopoliticallocation:world
concept:governmentorganization:capitol	concept:organizationheadquarteredincity	concept:city:seattle
concept:sportsteam:suns	concept:organizationhiredperson	concept:personmexico:steve_nash
concept:coach:new_york_jets	concept:subpartof	concept:sportsleague:nfl
concept:airport:little_rock	concept:subpartof	concept:book:arkansas
concept:sportsteam:ncaa_youth_kids	concept:agentcontrols	concept:coach:michigan_wolverines
concept:sportsteam:western_michigan_broncos	concept:agentcollaborateswithagent	concept:personmexico:ncaa
concept:shoppingmall:asheville	concept:subpartof	concept:creditunion:north_carolina
concept:city:princeton	concept:organizationhiredperson	concept:coach:bill_tierney
concept:company:sun	concept:headquarteredin	concept:city:washington_d_c
concept:person:edwards	concept:agentcollaborateswithagent	concept:female:hillary
concept:automobilemaker:jeff_bezos	concept:agentcontrols	concept:governmentorganization:amazon_com
concept:city:springfield	concept:subpartof	concept:stateorprovince:missouri
concept:governmentorganization:document	concept:organizationhiredperson	concept:personmexico:ryan_whitney
concept:vehicle:regions	concept:subpartof	concept:website:blood
concept:website:witn_tv	concept:subpartof	concept:retailstore:nbc
concept:stateorprovince:indiana	concept:organizationhiredperson	concept:person:davis
concept:celebrity:washington_state_cougars	concept:agentcollaborateswithagent	concept:personmexico:ncaa
concept:automobilemaker:gm	concept:headquarteredin	concept:city:detroit
concept:musicartist:journal	concept:agentcontrols	concept:celebrity:barron_s
concept:sportsteam:florida_state_seminoles	concept:subpartoforganization	concept:sportsteam:ncaa_youth_kids
concept:politician:jobs	concept:agentcontrols	concept:website:phone
concept:musicartist:times	concept:agentcollaborateswithagent	concept:person:tom_friedman
concept:personmexico:ncaa	concept:agentcontrols	concept:sportsteam:george_mason_patriots
concept:politicianus:john_kerry	concept:agentcollaborateswithagent	concept:politician:obama
concept:chemical:pipes	concept:subpartof	concept:governmentorganization:stormwater
concept:university:wozniak	concept:agentcontrols	concept:biotechcompany:apple
concept:sportsteam:gonzaga_bulldogs	concept:agentcollaborateswithagent	concept:personmexico:ncaa
concept:biotechcompany:china	concept:companyeconomicsector	concept:economicsector:insurance
concept:university:memphis	concept:subpartoforganization	concept:sportsteam:ncaa_mens_midwest_regionals
concept:musicartist:orange	concept:agentcollaborateswithagent	concept:university:france_telecom
concept:company:power	concept:organizationhiredperson	concept:personmexico:ryan_whitney
concept:city:jamaica	concept:agentbelongstoorganization	concept:sportsleague:mls
concept:sportsteam:pistons	concept:organizationhiredperson	concept:coach:richard_hamilton
concept:politicsblog:kpnx_tv	concept:subpartof	concept:retailstore:nbc
concept:person:mugabe	concept:agentcontrols	concept:personus:party
concept:bedroomitem:system	concept:subpartof	concept:museum:national_air
concept:county:chicago	concept:organizationhiredperson	concept:coach:dick_jauron
concept:sportsteam:citadel_bulldogs	concept:subpartoforganization	concept:sportsteam:ncaa_youth_kids
concept:actor:scott_mcnealy	concept:worksfor	concept:company:sun
concept:personus:jeremiah_wright	concept:agentcollaborateswithagent	concept:politician:obama
concept:personmexico:ncaa	concept:agentcontrols	concept:sportsteam:coastal_carolina_chanticleers
concept:sportsteam:nc_state	concept:organizationhiredperson	concept:personmexico:jim_valvano
concept:musicartist:journal	concept:agentcontrols	concept:company:cnn
concept:city:ontario	concept:subpartof	concept:stateorprovince:california
concept:country:united_states	concept:agentbelongstoorganization	concept:sportsleague:mls
concept:sportsteam:tennessee_state_tigers	concept:subpartoforganization	concept:sportsteam:ncaa_youth_kids
concept:stateorprovince:tennessee	concept:organizationhiredperson	concept:coach:doug_dickey
concept:programminglanguage:services	concept:subpartof	concept:visualizableattribute:storm_water
concept:sportsteam:nebraska_cornhuskers	concept:subpartoforganization	concept:sportsteam:ncaa_youth_kids
concept:coach:bob_stoops	concept:agentcollaborateswithagent	concept:comedian:oklahoma
concept:ceo:site_usage	concept:subpartof	concept:weatherphenomenon:air
concept:sportsteam:texas_longhorns	concept:agentcollaborateswithagent	concept:personmexico:ncaa
concept:company:case	concept:agentbelongstoorganization	concept:blog:america_online
concept:website:walb_tv	concept:subpartof	concept:retailstore:nbc
concept:politician:sheila_dixon	concept:worksfor	concept:county:baltimore
concept:building:houses	concept:organizationhiredperson	concept:personmexico:ryan_whitney
concept:male:world	concept:agentcollaborateswithagent	concept:person:greg001
concept:ceo:steve_case	concept:worksfor	concept:company:revolution_health_com
concept:stateorprovince:michigan	concept:organizationhiredperson	concept:politicianus:john_engler
concept:coach:mike_holmgren	concept:worksfor	concept:sportsteam:packers
concept:museum:facilities	concept:subpartof	concept:visualizablething:water_supply
concept:newspaper:sacramento_bee	concept:agentcollaborateswithagent	concept:athlete:dan_walters
concept:journalist:thomas_friedman	concept:worksfor	concept:politicsblog:ny_times
concept:televisionnetwork:cbs	concept:agentcontrols	concept:personcanada:ed_bradley
concept:politicsblog:wall_street_journal	concept:headquarteredin	concept:city:washington_d_c
concept:company:walt_disney_world	concept:organizationheadquarteredincity	concept:city:burbank
concept:sportsequipment:board	concept:subpartof	concept:weatherphenomenon:water
concept:personmexico:ryan_whitney	concept:worksfor	concept:country:left_parties
concept:buildingfeature:service	concept:subpartof	concept:beverage:full_water
concept:website:facebook	concept:organizationterminatedperson	concept:ceo:mark_zuckerberg
concept:coach:kansas_city_chiefs	concept:subpartof	concept:sportsleague:nfl
concept:city:phoenix	concept:organizationhiredperson	concept:coach:d_antoni
concept:blog:google	concept:acquired	concept:blog:blogger_com
concept:person:temple	concept:subpartof	concept:city:texas
concept:sportsteam:louisville_cardinals	concept:agentcollaborateswithagent	concept:personmexico:ncaa
concept:sportsteam:bears_29_17	concept:organizationhiredperson	concept:coach:mike_ditka
concept:company:nbc	concept:agentcontrols	concept:website:kvoa
concept:politician:obama	concept:agentcollaborateswithagent	concept:politicianus:al_gore
concept:county:miami	concept:organizationhiredperson	concept:person:davis
concept:sportsteam:broncos	concept:organizationhiredperson	concept:athlete:jeremy_bates
concept:sportsteam:boston_college	concept:organizationhiredperson	concept:coach:jagodzinski
concept:website:youtube	concept:agentcontrols	concept:island:chen
concept:geopoliticallocation:air_conditioning	concept:subpartof	concept:vehicle:air
concept:city:design	concept:subpartof	concept:weatherphenomenon:water
concept:coach:miami_dolphins	concept:subpartof	concept:sportsleague:nfl
concept:journalist:staff	concept:agentcollaborateswithagent	concept:biotechcompany:white
concept:sportsteam:eastern_michigan_eagles	concept:agentcollaborateswithagent	concept:personmexico:ncaa
concept:university:microsoft	concept:agentcollaborateswithagent	concept:personus:steve_ballmer
concept:nongovorganization:senate_judiciary_committee	concept:organizationhiredperson	concept:personmexico:ryan_whitney
concept:personmexico:ncaa	concept:agentcontrols	concept:sportsteam:niagara_purple_eagles
concept:city:washington_d_c	concept:organizationterminatedperson	concept:person:ty_willingham
concept:personafrica:george_bush	concept:agentcontrols	concept:election:white
concept:politician:jobs	concept:worksfor	concept:company:case
concept:sportsteam:new_orleans_hornets	concept:organizationhiredperson	concept:coach:byron_scott
concept:website:tacoda	concept:subpartof	concept:mldataset:aol
concept:journalist:bob_schieffer	concept:subpartof	concept:website:cbs
concept:coach:barry_melrose	concept:worksfor	concept:city:tampa_bay
concept:coach:philadelphia_eagles	concept:agentcollaborateswithagent	concept:sportsleague:nfl
concept:governmentorganization:governments	concept:agentcontrols	concept:transportation:money
concept:university:uf	concept:organizationhiredperson	concept:visualartist:meyer
concept:bathroomitem:water_treatment	concept:subpartof	concept:weatherphenomenon:water
concept:sportsteam:red_sox	concept:organizationterminatedperson	concept:personus:theo_epstein
concept:sportsteam:detroit_lions	concept:organizationhiredperson	concept:coach:mariucci
concept:journalist:maureen_dowd	concept:worksfor	concept:musicartist:times
concept:company:nbc	concept:agentcontrols	concept:televisionstation:kwqc_tv
concept:website:wwlp	concept:subpartof	concept:retailstore:nbc
concept:sportsteam:miami_dolphins	concept:organizationhiredperson	concept:person:don_shula
concept:bedroomitem:new	concept:subpartof	concept:transportation:airports
concept:stateorprovince:minnesota	concept:organizationhiredperson	concept:coach:brad_childress
concept:personnorthamerica:minnesota	concept:agentcontrols	concept:coach:glen_mason
concept:governmentorganization:government	concept:agentcontrols	concept:buildingfeature:total_amount
concept:country:__america	concept:organizationhiredperson	concept:personnorthamerica:kenneth_d__lewis
concept:personmexico:ncaa	concept:agentcontrols	concept:sportsteam:ohio_bobcats
concept:country:australia	concept:organizationhiredperson	concept:professor:john_howard
concept:female:yankees	concept:agentcollaborateswithagent	concept:personus:melky_cabrera
concept:coach:don_nelson	concept:worksfor	concept:sportsteam:golden_state_warriors
concept:personmexico:ncaa	concept:agentcontrols	concept:sportsteam:georgia_bulldogs
concept:country:england	concept:organizationhiredperson	concept:coach:brian_ashton
concept:automobilemaker:jeff_bezos	concept:agentcontrols	concept:museum:steve
concept:museum:wilmington	concept:subpartof	concept:company:north_carolina
concept:politician:jobs	concept:agentcontrols	concept:wallitem:beginning
concept:politicsissue:laws	concept:subpartof	concept:weatherphenomenon:water
concept:city:service	concept:agentcollaborateswithagent	concept:politician:jobs
concept:sportsteam:sacramento_kings	concept:organizationhiredperson	concept:coach:reggie_theus
concept:academicfield:businesses	concept:subpartof	concept:weatherphenomenon:water
concept:hallwayitem:areas	concept:subpartof	concept:weatherphenomenon:water
concept:stateorprovince:minnesota	concept:organizationhiredperson	concept:coach:herb_brooks
concept:geopoliticallocation:authorities	concept:subpartof	concept:river:state
concept:terroristorganization:state	concept:agentcontrols	concept:geometricshape:property
concept:county:edison	concept:subpartof	concept:radiostation:new_jersey
concept:coach:bill_tierney	concept:worksfor	concept:city:princeton
concept:personmexico:ncaa	concept:agentcontrols	concept:sportsteam:central_florida_knights
concept:stateorprovince:tennessee	concept:organizationhiredperson	concept:coach:philip_fulmer
concept:sportsteam:man_utd	concept:organizationhiredperson	concept:personmexico:alex_ferguson
concept:sportsleague:new	concept:organizationhiredperson	concept:coach:jim_schwartz
concept:sportsleague:new	concept:organizationhiredperson	concept:coach:mangini
concept:county:paris	concept:subpartof	concept:traditionalgame:vegas
concept:politicsblog:amazon_com	concept:acquired	concept:company:junglee
concept:stateorprovince:oregon	concept:organizationterminatedperson	concept:male:vin_lananna
concept:city:fredericksburg	concept:subpartof	concept:stateorprovince:virginia
concept:year:n1992	concept:subpartof	concept:city:texas
concept:person:mccain	concept:agentcollaborateswithagent	concept:female:hillary
concept:personus:warren_buffet	concept:agentcollaborateswithagent	concept:politician:jobs
concept:city:broomfield	concept:subpartof	concept:stateorprovince:colorado
concept:biotechcompany:white	concept:agentcollaborateswithagent	concept:governmentorganization:office
concept:city:portsmouth	concept:subpartof	concept:stateorprovince:virginia
concept:website:netscape	concept:subpartoforganization	concept:company:aol_
concept:televisionstation:kobi	concept:subpartof	concept:retailstore:nbc
concept:person:spurrier	concept:worksfor	concept:stateorprovince:south_carolina
concept:city:durango	concept:subpartof	concept:stateorprovince:colorado
concept:sportsteam:minnesota_duluth_bulldogs	concept:agentcollaborateswithagent	concept:personmexico:ncaa
concept:continent:europe	concept:organizationhiredperson	concept:personus:john_fleming
concept:personmexico:ryan_whitney	concept:worksfor	concept:politicalparty:republican_party
concept:sportsteam:charlotte_49ers	concept:subpartoforganization	concept:sportsteam:ncaa_youth_kids
concept:musicartist:policy	concept:organizationhiredperson	concept:personmexico:ryan_whitney
concept:sportsteam:wisconsin_badgers	concept:agentcollaborateswithagent	concept:personmexico:ncaa
concept:biotechcompany:apple	concept:acquired	concept:biotechcompany:pa_semi
concept:vehicle:states	concept:subpartof	concept:musicinstrument:asia
concept:university:southern_cal	concept:organizationhiredperson	concept:coach:carroll
concept:programminglanguage:services	concept:subpartof	concept:visualizablething:basic_water
concept:country:__america	concept:organizationhiredperson	concept:ceo:reggie_fils_aime
concept:televisionstation:wcau	concept:agentcollaborateswithagent	concept:company:nbc
concept:company:yahoo001	concept:acquired	concept:company:dialpad
concept:personmexico:ncaa	concept:agentcontrols	concept:sportsteam:kennesaw_state_owls
concept:coach:new	concept:agentcollaborateswithagent	concept:coach:rex_ryan
concept:company:national_city	concept:subpartoforganization	concept:bank:pnc
concept:mountain:fox	concept:agentcontrols	concept:website:kriv_tv
concept:visualizablething:measures	concept:subpartof	concept:weatherphenomenon:air
concept:geopoliticallocation:corporation	concept:subpartof	concept:weatherphenomenon:water
concept:politicsissue:programs	concept:subpartof	concept:visualizableattribute:drinking_water
concept:city:avon	concept:organizationhiredperson	concept:ceo:andrea_jung
concept:programminglanguage:system	concept:subpartof	concept:visualizableattribute:reliable_water
concept:company:nbc	concept:agentcontrols	concept:televisionstation:ksnt
concept:person:mccain	concept:agentcollaborateswithagent	concept:politicianus:rudy_giuliani
concept:coach:new_orleans_saints	concept:agentcollaborateswithagent	concept:sportsleague:nfl
concept:sportsteam:boston_college	concept:agentcollaborateswithagent	concept:personmexico:ncaa
concept:university:oracle	concept:agentcollaborateswithagent	concept:personus:larry_ellison
concept:company:nbc	concept:agentcontrols	concept:televisionstation:wwbt
concept:person:molly_moore	concept:worksfor	concept:city:washington_d_c
concept:governmentorganization:federal_agencies	concept:organizationhiredperson	concept:personmexico:ryan_whitney
concept:sportsteam:steelers	concept:organizationhiredperson	concept:coach:chuck_noll
concept:buildingfeature:buildings	concept:subpartof	concept:weatherphenomenon:water
concept:stateorprovince:georgia	concept:organizationhiredperson	concept:coach:richt
concept:bank:henderson	concept:subpartof	concept:radiostation:nevada
concept:university:central_intelligence_agency	concept:organizationhiredperson	concept:personmexico:ryan_whitney
concept:hospital:star	concept:organizationhiredperson	concept:person:rodriguez
concept:radiostation:new_jersey	concept:organizationterminatedperson	concept:scientist:no_
concept:sportsteam:valparaiso_crusaders	concept:agentcollaborateswithagent	concept:personmexico:ncaa
concept:company:clinton	concept:agentcontrols	concept:clothing:white
concept:governmentorganization:patriot	concept:organizationhiredperson	concept:person:belichick
concept:company:case	concept:organizationhiredperson	concept:personmexico:ryan_whitney
concept:televisionstation:wmgt	concept:televisionstationaffiliatedwith	concept:televisionnetwork:nbc_universal
concept:city:home	concept:subpartof	concept:book:oil
concept:sportsteam:uc_santa_barbara_gauchos	concept:subpartoforganization	concept:sportsteam:ncaa_youth_kids
concept:sportsteam:rochester_yellow_jackets	concept:agentcollaborateswithagent	concept:personmexico:ncaa
concept:sportsteam:fresno_state_bulldogs	concept:agentcollaborateswithagent	concept:personmexico:ncaa
concept:sportsteam:ucla	concept:organizationhiredperson	concept:coach:ben_howland
concept:coach:virginia_tech	concept:agentcollaborateswithagent	concept:coach:frank_beamer
concept:politician:obama	concept:agentbelongstoorganization	concept:politicalparty:house
concept:politicsissue:laws	concept:subpartof	concept:weatherphenomenon:air
concept:journalist:thomas_friedman	concept:worksfor	concept:musicartist:times
concept:book:new	concept:subpartof	concept:visualizablething:thousand_years
concept:sportsteam:ncaa_youth_kids	concept:subpartoforganization	concept:sportsteam:ncaa_mens_midwest_regionals
concept:buildingfeature:systems	concept:subpartof	concept:beverage:fluid
concept:city:florida	concept:organizationhiredperson	concept:coach:steve_addazio
concept:male:end	concept:agentcollaborateswithagent	concept:politician:jobs
concept:politician:jobs	concept:worksfor	concept:recordlabel:walt_disney
concept:sportsteam:east_carolina_pirates	concept:agentcollaborateswithagent	concept:personmexico:ncaa
concept:mountain:fox	concept:agentcollaborateswithagent	concept:person:brit_hume
concept:person:caterina_fake	concept:topmemberoforganization	concept:company:flickr001
concept:company:nbc	concept:companyeconomicsector	concept:academicfield:programming
concept:website:bill	concept:subpartof	concept:weatherphenomenon:air
concept:magazine:orlando	concept:subpartof	concept:city:florida
concept:male:dave_wannstedt	concept:worksfor	concept:sportsteam:florida_international
concept:city:cincinnati	concept:organizationhiredperson	concept:coach:brian_kelly
concept:ceo:brian_moynihan	concept:worksfor	concept:bank:bank_america
concept:politicianus:rodham_clinton	concept:agentcollaborateswithagent	concept:politician:obama
concept:stateorprovince:indiana	concept:organizationhiredperson	concept:coach:bill_lynch
concept:programminglanguage:system	concept:subpartof	concept:visualizableattribute:piped_water
concept:televisionnetwork:cbs	concept:agentcollaborateswithagent	concept:person:les_moonves
concept:website:ksby	concept:organizationheadquarteredincity	concept:city:san_luis_obispo
concept:governmentorganization:government	concept:agentcontrols	concept:website:resources
concept:sportsteam:cavaliers	concept:organizationhiredperson	concept:writer:brown
concept:person:home001	concept:worksfor	concept:university:google
concept:university:loyola	concept:organizationterminatedperson	concept:coach:jimmy_patsos
concept:ceo:andrea_jung	concept:topmemberoforganization	concept:biotechcompany:avon
concept:county:austin	concept:subpartof	concept:city:texas
concept:coach:san_antonio_spurs	concept:agentbelongstoorganization	concept:sportsleague:nba
concept:politician:obama	concept:agentcollaborateswithagent	concept:personus:hilary_rodham_clinton
concept:company:microsoft	concept:companyeconomicsector	concept:economicsector:electronics
concept:stateorprovince:tennessee	concept:organizationhiredperson	concept:personmexico:bruce_pearl
concept:biotechcompany:microsoft_corp	concept:agentcontrols	concept:company:gates
concept:personmexico:ncaa	concept:agentcontrols	concept:sportsteam:citadel_bulldogs
concept:sportsleague:terms	concept:organizationhiredperson	concept:personmexico:ryan_whitney
concept:governmentorganization:government	concept:agentcontrols	concept:academicfield:documents
concept:televisionstation:knop_tv	concept:subpartof	concept:retailstore:nbc
concept:sportsteam:uk	concept:organizationhiredperson	concept:personmexico:billy_gillispie
concept:sportsleague:nba	concept:subpartoforganization	concept:sportsteam:san_antonio
concept:buildingfeature:systems	concept:subpartof	concept:visualizablething:commercial_water
concept:university:usc	concept:organizationhiredperson	concept:coach:carroll
concept:male:world	concept:agentcollaborateswithagent	concept:politician:james
concept:country:england	concept:organizationhiredperson	concept:coach:steve_mcclaren
concept:sportsteam:dallas_cowboys	concept:organizationhiredperson	concept:coach:bill_parcells
concept:sportsteam:oral_roberts_golden_eagles	concept:agentcollaborateswithagent	concept:personmexico:ncaa
concept:person:riley001	concept:worksfor	concept:sportsteam:oregon_state_beavers
concept:politicsblog:tribune	concept:headquarteredin	concept:city:washington_d_c
concept:personaustralia:avery_johnson	concept:worksfor	concept:city:dallas
concept:politicianus:rodham_clinton	concept:agentcollaborateswithagent	concept:politicianus:barack
concept:sportsteam:south_florida_bulls	concept:agentcollaborateswithagent	concept:personmexico:ncaa
concept:university:southern_cal	concept:subpartoforganization	concept:sportsteam:ncaa_youth_kids
concept:company:weekly_standard001	concept:headquarteredin	concept:city:washington_d_c
concept:university:administration	concept:agentcontrols	concept:person:mugabe
concept:university:uconn	concept:organizationhiredperson	concept:personaustralia:jim_calhoun
concept:company:new_york	concept:agentcontrols	concept:vehicle:services
concept:wallitem:works	concept:subpartof	concept:chemical:sewage
concept:personmexico:ncaa	concept:agentcontrols	concept:sportsteam:cal_state_fullerton_titans
concept:city:melbourne	concept:subpartof	concept:city:florida
concept:county:penn_state	concept:organizationhiredperson	concept:coach:joe_paterno
concept:televisionnetwork:cbs	concept:agentcontrols	concept:televisionstation:whbf
concept:sociopolitical:justice	concept:subpartof	concept:room:house
concept:televisionstation:wrcb_tv	concept:subpartof	concept:retailstore:nbc
concept:coach:michigan_state_spartans	concept:agentcollaborateswithagent	concept:sportsteam:ncaa_youth_kids
concept:governmentorganization:regulatory_agencies	concept:subpartoforganization	concept:terroristorganization:state
concept:sportsteam:mississippi_rebels	concept:agentcollaborateswithagent	concept:personmexico:ncaa
concept:sportsteam:eastern_michigan_eagles	concept:subpartoforganization	concept:sportsteam:ncaa_youth_kids
concept:personnorthamerica:john_mccain	concept:agentcollaborateswithagent	concept:politician:w__bush
concept:televisionstation:wnyt_tv	concept:subpartof	concept:retailstore:nbc
concept:sportsteam:louisiana_lafayette_ragin_cajuns	concept:subpartoforganization	concept:sportsteam:ncaa_youth_kids
concept:coach:jack_del_rio	concept:worksfor	concept:city:jacksonville
concept:company:nbc	concept:agentcontrols	concept:televisionstation:ktiv
concept:sportsteam:new_york_mets	concept:agentcollaborateswithagent	concept:athlete:carlos_beltran
concept:coach:bobby_petrino	concept:worksfor	concept:stateorprovince:arkansas
concept:country:united_states	concept:agentcontrols	concept:city:number
concept:personmexico:ncaa	concept:agentcontrols	concept:sportsteam:tennessee_state_tigers
concept:company:intel	concept:agentcollaborateswithagent	concept:ceo:paul_otellini
concept:company:nbc	concept:agentcontrols	concept:televisionstation:wpsd_tv
concept:programminglanguage:services	concept:subpartof	concept:visualizableattribute:rural_water
concept:company:press	concept:organizationheadquarteredincity	concept:city:washington_d_c
concept:politician:jobs	concept:agentcontrols	concept:city:team
concept:sportsteam:mississippi_valley_state_delta_devils	concept:subpartoforganization	concept:sportsteam:ncaa_youth_kids
concept:sportsleague:new	concept:organizationhiredperson	concept:coach:bill_parcells
concept:sportsteam:brown_bears	concept:agentcollaborateswithagent	concept:personmexico:ncaa
concept:programminglanguage:system	concept:subpartof	concept:beverage:efficient_water
concept:stateorprovince:indiana	concept:organizationhiredperson	concept:coach:tom_crean
concept:sportsteam:stanford	concept:organizationhiredperson	concept:coach:harbaugh
concept:newspaper:times	concept:organizationheadquarteredincity	concept:city:l_a_
concept:country:south_korea	concept:organizationterminatedperson	concept:personasia:lee_won_jong
concept:televisionstation:kark_tv	concept:organizationheadquarteredincity	concept:city:little_rock
concept:personus:thomas_steen	concept:worksfor	concept:university:butler
concept:governmentorganization:house	concept:subpartoforganization	concept:governmentorganization:government
concept:city:delivery	concept:subpartof	concept:weatherphenomenon:water
concept:bank:dhl	concept:acquired	concept:bank:airborne
concept:coach:new	concept:subpartof	concept:city:texas
concept:creditunion:wisconsin	concept:subpartoforganization	concept:sportsteam:ncaa_mens_midwest_regionals
concept:governmentorganization:u_s__senate	concept:organizationhiredperson	concept:personmexico:ryan_whitney
concept:sportsteam:butler_bulldogs	concept:subpartoforganization	concept:sportsteam:ncaa_youth_kids
concept:personmexico:ryan_whitney	concept:worksfor	concept:nonprofitorganization:operations
concept:company:aol	concept:companyeconomicsector	concept:economicsector:internet
concept:personmexico:ncaa	concept:agentcontrols	concept:sportsteam:northeastern_huskies
concept:politicalparty:way	concept:organizationhiredperson	concept:personmexico:ryan_whitney
concept:publication:people_	concept:agentcontrols	concept:hotel:white
concept:company:canada	concept:companyeconomicsector	concept:economicsector:insurance
concept:room:back	concept:subpartof	concept:physicalaction:hands
concept:book:new	concept:subpartof	concept:politicsissue:markets
concept:blog:roger_ailes	concept:agentbelongstoorganization	concept:governmentorganization:fox_news
concept:county:olympia	concept:subpartof	concept:city:washington_d_c
concept:sportsteam:leafs	concept:organizationhiredperson	concept:coach:al_arbour
concept:coach:rich_brooks	concept:worksfor	concept:university:kentucky
concept:person:mccain	concept:agentcollaborateswithagent	concept:newspaper:president_elect_barack_obama
concept:sportsteam:sacred_heart_pioneers	concept:agentcollaborateswithagent	concept:personmexico:ncaa
concept:braintissue:knoxville	concept:subpartof	concept:weatherphenomenon:tennessee
concept:city:louisville	concept:organizationhiredperson	concept:coach:bobby_petrino
concept:company:nbc	concept:agentcontrols	concept:televisionstation:wtwo
concept:personmexico:colorado_rockies	concept:subpartof	concept:sportsleague:mlb
concept:stateorprovince:oklahoma	concept:organizationhiredperson	concept:athlete:jeff_campbell
concept:city:father	concept:agentbelongstoorganization	concept:politicalparty:house
concept:person:mccain	concept:agentcollaborateswithagent	concept:politicianus:nominee_barack_obama
concept:ceo:iphone	concept:agentcollaborateswithagent	concept:politician:jobs
concept:city:woodland_hills	concept:subpartof	concept:stateorprovince:california
concept:blog:google	concept:acquired	concept:website:writely
concept:politician:jobs	concept:agentcontrols	concept:charactertrait:world
concept:vehicle:services	concept:subpartof	concept:country:united_states
concept:person:andy_reid	concept:worksfor	concept:county:philadelphia
concept:company:nbc	concept:agentcontrols	concept:televisionstation:ksnw_tv
concept:terroristorganization:state	concept:agentcontrols	concept:profession:personnel
concept:city:springfield	concept:subpartof	concept:stateorprovince:virginia
concept:country:moldova	concept:subpartof	concept:vehicle:countries
concept:governmentorganization:u_s__senate	concept:organizationhiredperson	concept:person:republican
concept:politicianus:john_edwards	concept:agentcollaborateswithagent	concept:politician:obama
concept:personus:jason_giambi	concept:subpartof	concept:sportsleague:new
concept:sportsteam:colts	concept:agentcontrols	concept:charactertrait:dungy
concept:country:left_parties	concept:organizationhiredperson	concept:personus:party
concept:company:aol	concept:acquired	concept:company:userplane
concept:buildingfeature:home	concept:subpartof	concept:chemical:combustion
concept:coach:kentucky	concept:agentbelongstoorganization	concept:sportsteam:ncaa_youth_kids
concept:geopoliticallocation:partners	concept:subpartof	concept:weatherphenomenon:water
concept:sportsteam:pepperdine_waves	concept:subpartoforganization	concept:sportsteam:ncaa_youth_kids
concept:vehicle:services	concept:subpartof	concept:book:transit
concept:coach:locksley	concept:worksfor	concept:county:new_mexico
concept:sportsleague:western_conference	concept:agentcollaborateswithagent	concept:radiostation:san_antonio
concept:person:jeff_tedford	concept:worksfor	concept:professionalorganization:cal
concept:stateorprovince:california	concept:organizationhiredperson	concept:coach:tedford
concept:politician:jobs	concept:agentcontrols	concept:musicalbum:point
concept:programminglanguage:system	concept:subpartof	concept:visualizablething:drinking_water_supply
concept:sportsteam:titans	concept:organizationhiredperson	concept:coach:jeff_fisher
concept:county:york_county	concept:subpartof	concept:programminglanguage:state
concept:city:texas	concept:subpartof	concept:country:usa
concept:governmentorganization:justice_department	concept:organizationhiredperson	concept:personmexico:ryan_whitney
concept:televisionstation:wvtm_tv	concept:televisionstationaffiliatedwith	concept:televisionnetwork:nbc_universal
concept:scientist:balmer	concept:worksfor	concept:university:microsoft
concept:transportation:fax	concept:subpartof	concept:musicsong:form
concept:city:home	concept:subpartof	concept:university:google
concept:university:microsoft	concept:agentcollaborateswithagent	concept:ceo:steve_ballmer
concept:male:john_thompson_iii	concept:worksfor	concept:city:georgetown
concept:mountain:fox	concept:agentcontrols	concept:website:kdvr
concept:hallwayitem:project	concept:subpartof	concept:visualizablething:water_supply
concept:county:detroit	concept:organizationhiredperson	concept:personmexico:bernard_robinson
concept:company:ibm	concept:organizationterminatedperson	concept:person:thomas_watson
concept:televisionstation:khq__tv	concept:subpartof	concept:retailstore:nbc
concept:personmexico:ncaa	concept:agentcontrols	concept:sportsteam:santa_clara_broncos
concept:geopoliticallocation:agencies	concept:subpartoforganization	concept:governmentorganization:department
concept:personmexico:ncaa	concept:agentcontrols	concept:sportsteam:south_dakota_st_jackrabbits
concept:newspaper:herald	concept:organizationheadquarteredincity	concept:county:los_angeles_county
concept:personmexico:ncaa	concept:agentcontrols	concept:sportsteam:ball_state_cardinals
concept:personus:officials	concept:agentbelongstoorganization	concept:terroristorganization:state
concept:sportsteam:western_kentucky_hilltoppers	concept:agentcollaborateswithagent	concept:personmexico:ncaa
concept:city:round_rock	concept:subpartof	concept:stateorprovince:texas
concept:radiostation:job	concept:agentcontrols	concept:website:jobs
concept:buildingfeature:systems	concept:subpartof	concept:beverage:available_water
concept:televisionstation:kdlv_tv	concept:subpartof	concept:retailstore:nbc
concept:sportsteam:washington_state	concept:organizationhiredperson	concept:coach:paul_wulff
concept:televisionstation:ktiv	concept:televisionstationaffiliatedwith	concept:televisionnetwork:nbc_universal
concept:comedian:oklahoma	concept:subpartof	concept:sportsteam:ncaa_mens_midwest_regionals
concept:university:kentucky	concept:subpartoforganization	concept:sportsteam:ncaa_youth_kids
concept:sportsteam:buccaneers	concept:organizationhiredperson	concept:coach:jon_gruden
concept:city:uk	concept:organizationterminatedperson	concept:personasia:number
concept:company:nbc	concept:agentcollaborateswithagent	concept:journalist:andrea_mitchell
concept:city:worcester	concept:subpartof	concept:stateorprovince:massachusetts
concept:city:toronto	concept:organizationhiredperson	concept:coach:mitch_williams
concept:televisionnetwork:cbs	concept:agentcollaborateswithagent	concept:politicianus:mike_wallace
concept:sportsteam:cleveland_state_vikings	concept:agentcollaborateswithagent	concept:personmexico:ncaa
concept:politicianus:president_bush	concept:agentbelongstoorganization	concept:politicalparty:house
concept:company:nbc	concept:agentcontrols	concept:televisionstation:kulr_tv
concept:sportsteam:st__johns_red_storm	concept:subpartoforganization	concept:sportsteam:ncaa_youth_kids
concept:male:world	concept:agentcontrols	concept:museum:steve
concept:city:washington_d_c	concept:organizationhiredperson	concept:celebrity:don_james
concept:company:clinton	concept:agentcollaborateswithagent	concept:tradeunion:john_kerry
concept:county:penn_state	concept:subpartoforganization	concept:sportsteam:ncaa_youth_kids
concept:city:harrisonburg	concept:subpartof	concept:stateorprovince:virginia
concept:sportsteam:georgia_state	concept:organizationhiredperson	concept:personeurope:curry
concept:mlalgorithm:solutions	concept:subpartof	concept:visualizableattribute:drinking_water
concept:county:utah	concept:organizationhiredperson	concept:coach:kyle_whittingham
concept:televisionstation:wfla_tv	concept:subpartof	concept:retailstore:nbc
concept:buildingfeature:systems	concept:subpartof	concept:beverage:new
concept:coach:virginia_tech	concept:agentcontrols	concept:coach:frank_beamer
concept:city:father	concept:agentcollaborateswithagent	concept:company:clinton
concept:university:wozniak	concept:agentcollaborateswithagent	concept:company:apple002
concept:city:bush	concept:agentcollaborateswithagent	concept:politicianus:president_clinton
concept:stateorprovince:california	concept:agentcontrols	concept:vehicle:services
concept:tradeunion:agreement	concept:agentbelongstoorganization	concept:terroristorganization:state
concept:personmexico:ncaa	concept:agentcontrols	concept:sportsteam:notre_dame
concept:person:tom_friedman	concept:worksfor	concept:website:new_york_times
concept:radiostation:cleveland	concept:subpartof	concept:university:ohio
concept:jobposition:agency	concept:subpartof	concept:weatherphenomenon:water
concept:male:world	concept:agentcontrols	concept:city:number
concept:coach:new_orleans_hornets	concept:subpartof	concept:sportsleague:nfl
concept:company:france_telecom	concept:acquired	concept:biotechcompany:orange
concept:stateorprovince:iowa_hawkeyes	concept:agentcollaborateswithagent	concept:personmexico:ncaa
concept:website:paypal	concept:subpartof	concept:retailstore:ebay
concept:company:apple002	concept:organizationheadquarteredincity	concept:city:cupertino
concept:coach:reggie_theus	concept:worksfor	concept:sportsteam:sacramento_kings
concept:city:hagerstown	concept:subpartof	concept:stateorprovince:maryland
concept:vehicle:states	concept:subpartof	concept:vehicle:west_coast
concept:company:nbc	concept:agentcontrols	concept:televisionstation:wcnc_tv
concept:televisionstation:ksng	concept:televisionstationaffiliatedwith	concept:televisionnetwork:nbc_universal
concept:city:service	concept:subpartof	concept:book:electricity
concept:person:ronaldo	concept:worksfor	concept:politicsblog:star
concept:personmexico:ncaa	concept:agentcontrols	concept:sportsteam:wisconsin_badgers
concept:politician:obama	concept:agentcollaborateswithagent	concept:politicianus:john_kerry
concept:politicsissue:programs	concept:subpartof	concept:beverage:integrated_water
concept:buildingfeature:systems	concept:subpartof	concept:beverage:advanced_water
concept:person:republican	concept:agentcollaborateswithagent	concept:politicianus:gov__sarah_palin
concept:televisionstation:wptz	concept:organizationheadquarteredincity	concept:city:burlington
concept:politicalparty:dems	concept:organizationhiredperson	concept:personmexico:ryan_whitney
concept:coach:green_bay_packers	concept:agentbelongstoorganization	concept:sportsleague:nfl
concept:university:auburn	concept:organizationhiredperson	concept:coach:pat_dye
concept:musicartist:journal	concept:agentcontrols	concept:company:los_angeles
concept:room:house	concept:subpartof	concept:hallwayitem:gas
concept:city:palm_springs	concept:agentcollaborateswithagent	concept:comedian:sonny_bono
concept:website:amazon	concept:organizationterminatedperson	concept:ceo:jeff_bezos
concept:personmexico:ncaa	concept:agentcontrols	concept:sportsteam:boston_college
concept:company:microsoft_corporation	concept:acquired	concept:company:softricity
concept:profession:newark	concept:subpartof	concept:bridge:new_jersey
concept:politicianus:howard_dean	concept:worksfor	concept:nongovorganization:dnc
concept:radiostation:cleveland	concept:organizationhiredperson	concept:coach:mangini
concept:coach:jack_del_rio	concept:worksfor	concept:sportsteam:jacksonville_jaguars
concept:museum:facilities	concept:subpartof	concept:beverage:municipal_water
concept:sportsteam:knicks	concept:organizationhiredperson	concept:person:jeff_van_gundy
concept:county:chicago	concept:organizationhiredperson	concept:coach:lovie_smith
concept:governmentorganization:management	concept:organizationheadquarteredincity	concept:city:washington_d_c
concept:city:santa_rosa	concept:subpartof	concept:stateorprovince:california
concept:stateorprovince:minnesota	concept:organizationhiredperson	concept:coach:tim_brewster
concept:city:clinton	concept:agentcollaborateswithagent	concept:person:barbara_bush
concept:website:washington_times	concept:headquarteredin	concept:city:washington_d_c
concept:biotechcompany:apple	concept:agentcontrols	concept:university:wozniak
concept:personmexico:ncaa	concept:agentcontrols	concept:sportsteam:tennessee_chattanooga_mocs
concept:athlete:roy_williams	concept:worksfor	concept:creditunion:kansas
concept:sportsteam:colorado_state_rams	concept:agentcollaborateswithagent	concept:personmexico:ncaa
concept:bedroomitem:system	concept:subpartof	concept:musicalbum:stage
concept:musician:agencies	concept:agentbelongstoorganization	concept:governmentorganization:us_department
concept:terroristorganization:group	concept:organizationhiredperson	concept:personmexico:ryan_whitney
concept:personafrica:jonathan_schwartz	concept:worksfor	concept:company:sun
concept:politician:jobs	concept:agentcontrols	concept:musicalbum:stage
concept:automobilemodel:marquette	concept:subpartof	concept:creditunion:michigan
concept:company:nbc	concept:agentcontrols	concept:televisionstation:kmtr
concept:criminal:baton_rouge	concept:subpartof	concept:chemical:old
concept:university:memphis	concept:organizationhiredperson	concept:coach:john_calipari
concept:sportsteam:rutgers_scarlet_knights	concept:subpartoforganization	concept:sportsteam:ncaa_youth_kids
concept:sportsteam:ball_state_cardinals	concept:subpartoforganization	concept:sportsteam:ncaa_youth_kids
concept:sportsteam:man_utd	concept:agentcollaborateswithagent	concept:person:ronaldo
concept:recordlabel:dreamworks_skg	concept:companyeconomicsector	concept:politicsissue:entertainment
concept:university:google	concept:agentcollaborateswithagent	concept:ceo:eric_schmidt
concept:governmentorganization:governments	concept:agentcontrols	concept:geometricshape:property
concept:coach:louisville	concept:subpartof	concept:stateorprovince:colorado
concept:programminglanguage:technology	concept:subpartof	concept:visualizablething:water_supply
concept:coach:bob_stoops	concept:subpartof	concept:musicsong:oklahoma
concept:personmexico:ncaa	concept:agentcontrols	concept:sportsteam:minnesota_state_mavericks
concept:animal:head	concept:agentcontrols	concept:politician:jobs
concept:televisionstation:wstm	concept:televisionstationaffiliatedwith	concept:televisionnetwork:nbc_universal
concept:sportsteam:heat	concept:organizationhiredperson	concept:coach:van_gundy
concept:musicartist:season	concept:organizationhiredperson	concept:coach:mike_tomlin
concept:university:administration	concept:organizationhiredperson	concept:personmexico:ryan_whitney
concept:company:ibm	concept:acquired	concept:company:cognos
concept:coach:mississippi_state_bulldogs	concept:subpartof	concept:sportsteam:ncaa_youth_kids
concept:company:disney	concept:acquired	concept:company:abc_television_network
concept:company:craigslist	concept:organizationhiredperson	concept:personus:craig_newmark
concept:mlalgorithm:solutions	concept:subpartof	concept:weatherphenomenon:air
concept:company:clinton	concept:agentcollaborateswithagent	concept:male:barak
concept:creditunion:michigan	concept:organizationhiredperson	concept:coach:john_beilein
concept:athlete:paul_brown	concept:worksfor	concept:sportsteam:kansas_city_chiefs
concept:company:microsoft	concept:companyeconomicsector	concept:economicsector:computer_software
concept:coach:sylvester_croom	concept:worksfor	concept:university:msu
concept:website:friendster	concept:companyeconomicsector	concept:economicsector:social_networking
concept:buildingfeature:organizations	concept:subpartof	concept:programminglanguage:state
concept:professionalorganization:lions	concept:organizationhiredperson	concept:coach:steve_mariucci
concept:sportsteam:georgetown_hoyas	concept:agentcollaborateswithagent	concept:personmexico:ncaa
concept:buildingfeature:systems	concept:subpartof	concept:beverage:modern_water
concept:blog:iowa	concept:companyeconomicsector	concept:economicsector:insurance
concept:programminglanguage:system	concept:subpartof	concept:room:sewer
concept:company:new_york	concept:organizationhiredperson	concept:coach:van_gundy
concept:newspaper:journal	concept:agentcontrols	concept:website:chicago_tribune
concept:city:silver_spring	concept:subpartof	concept:stateorprovince:maryland
concept:politicalparty:democrats	concept:agentcollaborateswithagent	concept:politician:clinton
concept:televisionstation:wsav_tv	concept:televisionstationaffiliatedwith	concept:televisionnetwork:nbc_universal
concept:person:duke	concept:agentcollaborateswithagent	concept:sportsteam:ncaa_youth_kids
concept:sportsteam:bills	concept:organizationhiredperson	concept:personmexico:ryan_whitney
concept:programminglanguage:system	concept:subpartof	concept:politicsissue:innovative_water
concept:sportsteam:pittsburg_state_gorillas	concept:subpartoforganization	concept:sportsteam:ncaa_youth_kids
concept:city:area	concept:organizationterminatedperson	concept:scientist:no_
concept:politician:norwood	concept:subpartof	concept:beach:massachusetts
concept:sportsteam:cleveland_browns	concept:organizationhiredperson	concept:person:belichick
concept:county:chicago	concept:subpartof	concept:stateorprovince:illinois
concept:profession:personnel	concept:subpartof	concept:weatherphenomenon:water
concept:city:costa_rica	concept:agentbelongstoorganization	concept:sportsleague:mls
concept:city:arkansas	concept:subpartof	concept:country:usa
concept:coach:randy_shannon	concept:worksfor	concept:city:um
concept:city:xavier	concept:subpartoforganization	concept:sportsteam:ncaa_youth_kids
concept:blog:george_w__bush	concept:agentcollaborateswithagent	concept:criminal:gore
concept:nongovorganization:u_s_	concept:organizationhiredperson	concept:personmexico:ryan_whitney
concept:country:gambia	concept:agentbelongstoorganization	concept:sportsleague:mls
concept:automobilemaker:honda	concept:companyeconomicsector	concept:economicsector:auto
concept:city:children	concept:subpartof	concept:weatherphenomenon:air
concept:publication:macworld	concept:agentcontrols	concept:personus:jobs
concept:county:los_angeles_county	concept:organizationhiredperson	concept:politicianus:richard_riordan
concept:county:miami	concept:organizationhiredperson	concept:musician:jimmy_johnson
concept:female:yankees	concept:agentcollaborateswithagent	concept:personus:bernie_williams
concept:agent:division	concept:organizationterminatedperson	concept:scientist:no_
concept:buildingfeature:project	concept:subpartof	concept:visualizableattribute:rural_water
concept:person:duke	concept:agentcollaborateswithagent	concept:politicianus:mike_krzyzewski
concept:book:new	concept:subpartof	concept:musicartist:shows
concept:tradeunion:congress	concept:organizationhiredperson	concept:personmexico:ryan_whitney
concept:personmexico:ncaa	concept:subpartof	concept:sportsteam:ncaa_mens_midwest_regionals
concept:university:auburn	concept:organizationhiredperson	concept:coach:tuberville
concept:nongovorganization:u_s_	concept:organizationhiredperson	concept:ceo:bernard_l__madoff
concept:politicianus:palin	concept:agentcollaborateswithagent	concept:personnorthamerica:john_mccain
concept:politician:obama	concept:agentcollaborateswithagent	concept:female:hillary
concept:televisionstation:wesh	concept:subpartoforganization	concept:televisionnetwork:nbc_universal
concept:biotechcompany:white	concept:agentcollaborateswithagent	concept:governmentorganization:house
concept:coach:tommy_bowden	concept:agentcollaborateswithagent	concept:coach:clemson
concept:personnorthamerica:everett	concept:subpartof	concept:city:washington_d_c
concept:sportsteam:indiana_state_sycamores	concept:subpartoforganization	concept:sportsteam:ncaa_youth_kids
concept:person:t__boone_pickens	concept:worksfor	concept:newspaper:texas
concept:city:team	concept:organizationhiredperson	concept:male:dale_mitchell
concept:city:greensboro	concept:subpartof	concept:creditunion:north_carolina
concept:biotechcompany:apple	concept:companyeconomicsector	concept:economicsector:consumer_electronics
concept:televisionstation:kcfw_tv	concept:televisionstationaffiliatedwith	concept:televisionnetwork:nbc_universal
concept:personmexico:ncaa	concept:agentcontrols	concept:sportsteam:sam_houston_state_bearkats
concept:city:elyria	concept:subpartof	concept:university:ohio
concept:sportsteam:valparaiso_crusaders	concept:subpartoforganization	concept:sportsteam:ncaa_youth_kids
concept:city:washington_d_c	concept:organizationhiredperson	concept:person:marion_barry
concept:stateorprovince:indiana	concept:organizationhiredperson	concept:personmexico:ike_davis
concept:personmexico:ncaa	concept:agentcontrols	concept:sportsteam:liberty_flames
concept:sportsteam:o_s	concept:organizationhiredperson	concept:coach:doc_holliday
concept:athlete:mike_singletary	concept:worksfor	concept:county:san_francisco
concept:newspaper:texas	concept:companyeconomicsector	concept:economicsector:insurance_companies
concept:geopoliticallocation:agencies	concept:subpartoforganization	concept:tradeunion:congress
concept:personmexico:ryan_whitney	concept:worksfor	concept:musicartist:secret_service
concept:sportsteam:la_salle_explorers	concept:subpartoforganization	concept:sportsteam:ncaa_youth_kids
concept:coach:new	concept:subpartof	concept:sportsgame:days_last_week
concept:company:clinton	concept:agentcollaborateswithagent	concept:criminal:gore
concept:personmexico:ncaa	concept:agentcontrols	concept:sportsteam:south_dakota_coyotes
concept:country:england	concept:organizationhiredperson	concept:personaustralia:fabio_capello
concept:sportsteam:dallas_cowboys	concept:organizationhiredperson	concept:coach:wade_phillips
concept:city:florida	concept:agentcontrols	concept:programminglanguage:services
concept:visualizablething:use	concept:organizationhiredperson	concept:personmexico:ryan_whitney
concept:county:baltimore	concept:subpartof	concept:stateorprovince:maryland
concept:musician:agencies	concept:agentbelongstoorganization	concept:governmentorganization:u_s__department
concept:person:stephen	concept:agentbelongstoorganization	concept:company:apple001
concept:politicianus:al_gore	concept:agentcollaborateswithagent	concept:politician:obama
concept:terroristorganization:state	concept:agentcontrols	concept:physicalcharacteristic:statutes
concept:buildingfeature:systems	concept:subpartof	concept:visualizableattribute:small_scale_water
concept:buildingfeature:service	concept:subpartof	concept:hallwayitem:gas
concept:company:amazon_com_inc	concept:acquired	concept:company:abebooks
concept:city:service	concept:subpartof	concept:nongovorganization:u_s_
concept:athlete:paul_brown	concept:worksfor	concept:city:st_louis
concept:male:bill_gates	concept:agentcollaborateswithagent	concept:politician:clinton
concept:university:uconn	concept:subpartoforganization	concept:sportsteam:ncaa_youth_kids
concept:creditunion:michigan	concept:organizationhiredperson	concept:athlete:rich_rodriguez
concept:programminglanguage:procedures	concept:subpartof	concept:weatherphenomenon:air
concept:musician:agencies	concept:agentbelongstoorganization	concept:professionalorganization:federal
concept:bank:citizens	concept:organizationhiredperson	concept:personmexico:ryan_whitney
concept:comedian:frank_melton	concept:worksfor	concept:newspaper:jackson
concept:buildingfeature:home	concept:subpartof	concept:visualizablething:outside_air
concept:personmexico:ryan_whitney	concept:worksfor	concept:country:party
concept:politician:jobs	concept:agentcontrols	concept:politicsissue:god
concept:sportsteam:georgia_tech	concept:agentcollaborateswithagent	concept:personmexico:ncaa
concept:city:cincinnati	concept:organizationhiredperson	concept:coach:mick_cronin
concept:blog:america_online	concept:agentcollaborateswithagent	concept:company:case
concept:televisionstation:wcmh_tv	concept:televisionstationaffiliatedwith	concept:televisionnetwork:nbc_universal
concept:geopoliticallocation:air_conditioning	concept:subpartof	concept:transportation:central_air
concept:personus:jon_cohen	concept:worksfor	concept:blog:science
concept:governmentorganization:directory	concept:subpartoforganization	concept:terroristorganization:state
concept:country:__america	concept:organizationterminatedperson	concept:personasia:number
concept:stateorprovince:michigan	concept:organizationhiredperson	concept:person:rodriguez
concept:newspaper:herald	concept:headquarteredin	concept:county:los_angeles_county
concept:governmentorganization:industry	concept:organizationhiredperson	concept:personmexico:ryan_whitney
concept:governmentorganization:commission	concept:subpartof	concept:weatherphenomenon:water
concept:city:washington_d_c	concept:organizationhiredperson	concept:person:molly_moore
concept:sportsteam:raptors	concept:organizationhiredperson	concept:coach:mitch_williams
concept:sportsteam:wake_forest_demon_deacons	concept:subpartoforganization	concept:sportsteam:ncaa_youth_kids
concept:televisionstation:kytv	concept:subpartoforganization	concept:televisionnetwork:nbc_universal
concept:personmexico:ryan_whitney	concept:worksfor	concept:county:records
concept:profession:professionals	concept:subpartof	concept:weatherphenomenon:water
concept:city:link	concept:organizationhiredperson	concept:personmexico:ryan_whitney
concept:stateorprovince:metairie	concept:subpartof	concept:musicsong:louisiana
concept:coach:new	concept:subpartof	concept:city:washington_d_c
concept:musicartist:times	concept:agentcollaborateswithagent	concept:journalist:john_markoff
concept:politicianus:jimmy_carter	concept:agentcollaborateswithagent	concept:politician:obama
concept:personus:denzel_washington	concept:agentcollaborateswithagent	concept:politician:obama
concept:company:nbc	concept:agentcontrols	concept:televisionstation:kget_tv
concept:politician:jobs	concept:agentcontrols	concept:company:imac
concept:sportsteam:arizona_cardinals_27_23	concept:organizationhiredperson	concept:coach:dennis_green
concept:sportsleague:nfl	concept:agentcollaborateswithagent	concept:sportsteam:buffalo_bills
concept:sportsleague:new	concept:organizationhiredperson	concept:person:lane_kiffin
concept:politician:jobs	concept:agentcollaborateswithagent	concept:company:innovation
concept:personmexico:frank_robinson	concept:worksfor	concept:newspaper:wyoming
concept:televisionstation:kulr_tv	concept:televisionstationaffiliatedwith	concept:televisionnetwork:nbc_universal
concept:wallitem:works	concept:subpartof	concept:hallwayitem:air
concept:personmexico:ryan_whitney	concept:worksfor	concept:governmentorganization:office
concept:personmexico:ryan_whitney	concept:worksfor	concept:governmentorganization:u_s__congress
concept:governmentorganization:doj	concept:organizationhiredperson	concept:personmexico:ryan_whitney
concept:programminglanguage:services	concept:subpartof	concept:visualizableattribute:sanitation
concept:room:house	concept:subpartof	concept:sportsteam:heat
concept:vehicle:services	concept:subpartof	concept:hallwayitem:fuel
concept:room:development	concept:subpartof	concept:weatherphenomenon:water
concept:blog:ksnf	concept:agentcollaborateswithagent	concept:company:nbc
concept:journalist:tom_brokaw	concept:worksfor	concept:musicartist:television
concept:sportsleague:new	concept:organizationhiredperson	concept:coach:cam_cameron
concept:company:general_motors	concept:organizationheadquarteredincity	concept:city:lansing
concept:city:budget	concept:organizationhiredperson	concept:personmexico:ryan_whitney
concept:newspaper:texas	concept:companyeconomicsector	concept:academicfield:real_estate
concept:city:service	concept:subpartof	concept:book:oil
concept:museum:facilities	concept:subpartof	concept:politicsissue:more_water
concept:person:mccain	concept:agentcollaborateswithagent	concept:politicianus:palin
concept:programminglanguage:state	concept:subpartof	concept:room:house
concept:ceo:mark_zuckerberg	concept:topmemberoforganization	concept:website:facebook
concept:sportsteam:savannah_state_tigers	concept:subpartoforganization	concept:sportsteam:ncaa_youth_kids
concept:county:atlanta	concept:organizationhiredperson	concept:coach:petrino
concept:coach:barry_melrose	concept:subpartof	concept:perceptionevent:lightning
concept:programminglanguage:system	concept:subpartof	concept:beverage:integrated_water
concept:politicianus:democratic_presidential_candidate_barack_obama	concept:agentcollaborateswithagent	concept:person:mccain
concept:vehicle:states	concept:subpartof	concept:airport:south_america
concept:personcanada:search	concept:agentcontrols	concept:website:iphone
concept:city:boston	concept:organizationhiredperson	concept:person:john__honey_fitz__fitzgerald
concept:coach:san_antonio_spurs	concept:subpartof	concept:sportsleague:nba
concept:athlete:paul_brown	concept:worksfor	concept:sportsteam:philadelphia_eagles
concept:newspaper:daily_journal	concept:companyeconomicsector	concept:economicsector:insurance
concept:televisionstation:wise_tv	concept:agentcollaborateswithagent	concept:company:nbc
concept:city:population	concept:subpartof	concept:weatherphenomenon:water
concept:city:conroe	concept:subpartof	concept:stateorprovince:texas
concept:county:york_city	concept:subpartof	concept:stateorprovince:new_york
concept:company:west_virginia	concept:organizationhiredperson	concept:personmexico:stewart
concept:radiostation:job	concept:agentbelongstoorganization	concept:company:apple001
concept:musicartist:orange	concept:organizationhiredperson	concept:coach:greg_robinson
concept:musicartist:journal	concept:agentcontrols	concept:company:new_york
concept:programminglanguage:system	concept:subpartof	concept:landscapefeatures:hot_water
concept:newspaper:journal	concept:agentcontrols	concept:publication:people_
concept:visualartist:meyer	concept:subpartof	concept:buildingmaterial:head
concept:person:monroe	concept:subpartof	concept:musicsong:louisiana
concept:personmexico:ncaa	concept:agentcontrols	concept:sportsteam:jacksonville_state_gamecocks
concept:profession:employees	concept:subpartof	concept:weatherphenomenon:water
concept:sportsequipment:officials	concept:subpartof	concept:hallwayitem:air
concept:website:l_a__weekly	concept:organizationheadquarteredincity	concept:city:la
concept:city:boston	concept:organizationhiredperson	concept:politicianus:thomas_menino
concept:coach:new	concept:subpartof	concept:city:towns
concept:sportsteam:pittsburgh_panthers	concept:agentcollaborateswithagent	concept:personmexico:ncaa
concept:coach:josh_mcdaniels	concept:worksfor	concept:sportsteam:broncos
concept:sportsteam:san_jose_sharks	concept:organizationhiredperson	concept:coach:al_arbour
concept:person:fred	concept:agentcollaborateswithagent	concept:male:world
concept:coach:alabama_crimson_tide	concept:subpartof	concept:sportsteam:ncaa_youth_kids
concept:country:turkey	concept:organizationhiredperson	concept:personmexico:ryan_whitney
concept:city:service	concept:subpartoforganization	concept:governmentorganization:government
concept:bedroomitem:new	concept:subpartof	concept:bodypart:art
concept:female:saint_paul	concept:subpartof	concept:personnorthamerica:minnesota
concept:beach:jacksonville	concept:subpartof	concept:creditunion:north_carolina
concept:sportsteam:denver_nuggets	concept:organizationhiredperson	concept:coach:george_karl
concept:company:microsoft	concept:acquired	concept:biotechcompany:fast
concept:hallwayitem:market	concept:subpartof	concept:beverage:industrial_water
concept:county:seattle	concept:subpartof	concept:city:washington_d_c
concept:coach:bruce_arena	concept:worksfor	concept:city:team
concept:company:wthr_tv	concept:subpartof	concept:retailstore:nbc
concept:ceo:chad_hurley	concept:worksfor	concept:website:youtube
concept:governmentorganization:government	concept:agentcontrols	concept:emotion:data
concept:city:sheboygan	concept:subpartof	concept:creditunion:wisconsin
concept:celebrity:davidson_wildcats	concept:agentcollaborateswithagent	concept:personmexico:ncaa
concept:coach:mike_shanahan	concept:subpartof	concept:sportsteam:broncos
concept:politicianus:president_clinton	concept:agentbelongstoorganization	concept:politicalparty:house
concept:university:parkersburg	concept:subpartof	concept:company:west_virginia
concept:automobilemaker:jeff_bezos	concept:agentcontrols	concept:website:amazon
concept:sportsteam:blue_jays	concept:agentcontrols	concept:personmexico:roberto_alomar
concept:programminglanguage:system	concept:subpartof	concept:beverage:home_water
concept:city:place	concept:subpartof	concept:weatherphenomenon:air
concept:coach:new	concept:subpartof	concept:city:service
concept:personmexico:ncaa	concept:agentcontrols	concept:sportsteam:weber_state_wildcats
concept:blog:america_online	concept:companyeconomicsector	concept:economicsector:internet
[truncated: 2,687 more rows]
