# Supplementary material
Source: ML conference proceedings conference paper supplement (https://proceedings.neurips.cc/paper_files/paper/2021/hash/0fd600c953cde8121262e322ef09f70e-Abstract.html)
Supplement: Supplementary file 1 [file 0fd600c953cde8121262e322ef09f70e-Supplemental.zip › Supplementary_Material_Paper_8745/data/GraIL-BM_WN18RR_v2/test/test-fact.txt]

08858942	_has_part	08890097
01725712	_derivationally_related_form	07480896
02542280	_derivationally_related_form	01203676
10515194	_derivationally_related_form	05945508
01958615	_derivationally_related_form	00299217
01398212	_hypernym	14989820
02112891	_hypernym	02112029
04695963	_derivationally_related_form	01537409
02491383	_derivationally_related_form	10526096
10489944	_hypernym	10707233
01856225	_member_meronym	01856553
05748786	_derivationally_related_form	02666882
00812526	_derivationally_related_form	01572978
01949110	_hypernym	01955984
02064131	_derivationally_related_form	13774404
09334396	_derivationally_related_form	01502762
09688008	_derivationally_related_form	02957823
05715864	_derivationally_related_form	02194495
04926427	_hypernym	04924103
14798450	_derivationally_related_form	02627221
01098869	_derivationally_related_form	01156438
01926984	_verb_group	02099829
02964389	_derivationally_related_form	01612084
07635155	_hypernym	07628870
13291189	_derivationally_related_form	02543874
00753428	_hypernym	00752493
01144657	_derivationally_related_form	00452293
01131043	_also_see	01125429
01073241	_derivationally_related_form	01182293
01074650	_also_see	02530861
10488016	_hypernym	10632576
02632567	_derivationally_related_form	14493426
08277805	_derivationally_related_form	09759311
05050379	_hypernym	05050115
00470084	_derivationally_related_form	00233386
02666943	_derivationally_related_form	01322854
08873622	_has_part	08597023
01781983	_derivationally_related_form	14405931
00299217	_derivationally_related_form	01958615
06220616	_hypernym	06212839
01904293	_derivationally_related_form	09281777
00481739	_derivationally_related_form	06667317
01182293	_derivationally_related_form	04638585
02046755	_derivationally_related_form	13878112
07813107	_derivationally_related_form	00213353
00467717	_derivationally_related_form	05924920
09759311	_derivationally_related_form	02669885
00409211	_derivationally_related_form	02443849
01775535	_hypernym	01775164
10672662	_derivationally_related_form	05186306
05707146	_derivationally_related_form	00614999
02519991	_derivationally_related_form	00259643
01845627	_member_meronym	01855672
01390616	_derivationally_related_form	00113113
14299070	_derivationally_related_form	00091124
01955508	_derivationally_related_form	00121645
01389329	_derivationally_related_form	00616083
00596393	_derivationally_related_form	10464542
00601822	_derivationally_related_form	00180770
02530861	_also_see	00853776
00560893	_derivationally_related_form	00358931
01856748	_hypernym	01507175
08877208	_instance_hypernym	08633957
06682794	_derivationally_related_form	01955127
13855627	_derivationally_related_form	00661213
00838367	_derivationally_related_form	01179865
03150232	_derivationally_related_form	01522276
01073822	_derivationally_related_form	04993413
01944692	_derivationally_related_form	02858304
00350889	_hypernym	00350461
02478059	_derivationally_related_form	14455700
07238102	_derivationally_related_form	02677332
09424489	_derivationally_related_form	01816431
02887209	_hypernym	04336034
13580723	_derivationally_related_form	01193721
10093658	_derivationally_related_form	01140794
00330160	_derivationally_related_form	00438178
13552270	_derivationally_related_form	00239614
01224744	_verb_group	00597385
05219724	_has_part	05514905
01354006	_derivationally_related_form	14705718
01234345	_derivationally_related_form	00421535
04576211	_has_part	04574999
02270165	_derivationally_related_form	10330189
00044673	_derivationally_related_form	00417001
02250625	_derivationally_related_form	13282550
00891216	_derivationally_related_form	13344804
00182213	_derivationally_related_form	02461314
14622893	_has_part	14619225
05238282	_has_part	05244934
05174653	_derivationally_related_form	02519991
13282550	_derivationally_related_form	02519991
03933529	_derivationally_related_form	02085742
00366547	_derivationally_related_form	00357680
02519991	_derivationally_related_form	13290676
01493897	_derivationally_related_form	14425974
04828255	_derivationally_related_form	01782519
08277805	_hypernym	08276720
01406356	_verb_group	01406512
01487311	_hypernym	01488956
04980656	_derivationally_related_form	01053144
15129927	_hypernym	05816790
01537409	_derivationally_related_form	05244934
02531422	_also_see	00856860
05003090	_derivationally_related_form	01882170
02125641	_derivationally_related_form	05714466
00113113	_derivationally_related_form	01754105
00695523	_also_see	01475282
00658052	_derivationally_related_form	01009871
06561942	_derivationally_related_form	00844298
02235666	_verb_group	02537407
13874073	_derivationally_related_form	00417001
14971519	_derivationally_related_form	00238867
02291708	_synset_domain_topic_of	13333237
01150467	_hypernym	01150200
13282550	_derivationally_related_form	02253456
13720096	_hypernym	13716084
01167780	_derivationally_related_form	03200357
01475282	_also_see	02451951
10330189	_derivationally_related_form	02269894
08612049	_has_part	08495617
00105778	_derivationally_related_form	09930876
10478960	_derivationally_related_form	02163301
00842989	_derivationally_related_form	09762385
01097031	_derivationally_related_form	08397255
00657728	_derivationally_related_form	00874977
02196690	_derivationally_related_form	14599641
01684337	_derivationally_related_form	00937656
00980908	_derivationally_related_form	06790042
00658052	_derivationally_related_form	06483454
05659365	_hypernym	05659621
01074650	_derivationally_related_form	10112591
02072501	_derivationally_related_form	13649791
01227137	_also_see	01370590
00800930	_hypernym	00685683
02250625	_derivationally_related_form	00259894
13573666	_hypernym	13575433
07551052	_derivationally_related_form	00859604
05527216	_has_part	05525628
00590148	_derivationally_related_form	09906986
09334396	_derivationally_related_form	01292727
00859604	_derivationally_related_form	01073241
00843468	_derivationally_related_form	06730780
09203827	_member_meronym	09316454
00239614	_verb_group	00238867
01958615	_synset_domain_topic_of	00450335
02700104	_derivationally_related_form	00552841
01960911	_derivationally_related_form	00442115
04236001	_hypernym	03895866
06685456	_derivationally_related_form	00890100
00365188	_verb_group	00365647
07450343	_hypernym	07447641
08871007	_has_part	08877208
00622584	_derivationally_related_form	01143838
06767777	_derivationally_related_form	01058880
01820302	_derivationally_related_form	07491981
10293332	_derivationally_related_form	01924505
09759311	_derivationally_related_form	08280124
02080577	_derivationally_related_form	02671880
00622266	_derivationally_related_form	01574292
04493505	_derivationally_related_form	02079525
03216828	_derivationally_related_form	01305731
00657550	_derivationally_related_form	05737153
13969243	_derivationally_related_form	02700104
09612291	_derivationally_related_form	00869596
01526956	_derivationally_related_form	03872495
02672540	_derivationally_related_form	00259643
02058794	_also_see	02523275
05524615	_hypernym	05525252
05014099	_derivationally_related_form	00328128
02191766	_derivationally_related_form	05715864
00812274	_derivationally_related_form	01216004
10298912	_derivationally_related_form	00595146
01216522	_derivationally_related_form	00812526
00299580	_derivationally_related_form	05755486
00085678	_derivationally_related_form	02274482
01547641	_verb_group	01547390
15183428	_hypernym	15157225
06200010	_derivationally_related_form	00350461
01027263	_derivationally_related_form	04659090
02085742	_derivationally_related_form	10655169
01158690	_derivationally_related_form	00467717
00851933	_derivationally_related_form	01224517
00259643	_derivationally_related_form	02519991
09826204	_derivationally_related_form	01941093
13876371	_derivationally_related_form	02738544
02120458	_derivationally_related_form	00513401
01524298	_hypernym	01524871
02653996	_derivationally_related_form	02945161
10058411	_derivationally_related_form	01820302
02834778	_has_part	04289690
02446164	_derivationally_related_form	00583461
00015303	_derivationally_related_form	00858849
00842989	_derivationally_related_form	07234230
00320486	_derivationally_related_form	02001858
00963241	_hypernym	00962129
00356790	_derivationally_related_form	01387786
14585519	_derivationally_related_form	00330144
01354405	_derivationally_related_form	04049405
15145586	_has_part	15146545
02163301	_derivationally_related_form	01135529
04854389	_hypernym	04827652
01385920	_derivationally_related_form	09307300
00937656	_derivationally_related_form	01551871
02326695	_also_see	02451951
13279262	_hypernym	13281275
01179865	_derivationally_related_form	07800091
13875970	_derivationally_related_form	00143204
01940403	_derivationally_related_form	00302394
00061290	_derivationally_related_form	01955127
01951276	_derivationally_related_form	13326198
00467717	_derivationally_related_form	13617952
02632567	_hypernym	02632353
00963283	_derivationally_related_form	00963241
01432601	_derivationally_related_form	10395073
01193099	_hypernym	01166351
01961691	_synset_domain_topic_of	00441824
00443231	_hypernym	00442115
13649791	_hypernym	13603305
05058140	_derivationally_related_form	00438178
01273263	_derivationally_related_form	02784732
01131043	_also_see	02037272
00136800	_derivationally_related_form	13446197
01510827	_derivationally_related_form	14008806
00683185	_also_see	01880531
00073828	_hypernym	00070965
01640850	_also_see	00666058
00658052	_derivationally_related_form	14429608
04565375	_derivationally_related_form	01087197
02123672	_derivationally_related_form	05713737
04046810	_hypernym	04048568
01958615	_synset_domain_topic_of	00299217
07480068	_hypernym	00026192
03933529	_derivationally_related_form	01305731
08894456	_has_part	08895928
01193099	_derivationally_related_form	01073655
02261464	_derivationally_related_form	08069878
01073655	_hypernym	01073241
01535709	_also_see	01640850
00854000	_derivationally_related_form	01226600
03000447	_derivationally_related_form	13575433
10527334	_hypernym	10503452
01840238	_derivationally_related_form	10096217
00890100	_derivationally_related_form	06685456
13282007	_derivationally_related_form	02249741
00014742	_derivationally_related_form	15273626
14798450	_hypernym	15010703
00208943	_derivationally_related_form	02405252
02667228	_hypernym	02666882
02332999	_derivationally_related_form	07556637
01100145	_derivationally_related_form	10782791
14493426	_derivationally_related_form	02632567
09361517	_hypernym	09437454
01235258	_derivationally_related_form	01153486
00852922	_hypernym	00849080
00841628	_derivationally_related_form	01193721
01167981	_derivationally_related_form	03200357
00619183	_derivationally_related_form	15159819
01854415	_hypernym	01852861
09906848	_hypernym	10474645
13858045	_hypernym	13857486
01845627	_member_meronym	01854047
00105778	_derivationally_related_form	00513401
01510827	_derivationally_related_form	00409211
01100145	_derivationally_related_form	10782940
01639105	_derivationally_related_form	03772269
02384686	_derivationally_related_form	07186148
14436875	_derivationally_related_form	02237631
14429608	_hypernym	14429985
01182024	_derivationally_related_form	01197338
00459114	_hypernym	00458754
05645199	_derivationally_related_form	00609100
10768585	_derivationally_related_form	01093172
00609506	_derivationally_related_form	01941093
01820302	_derivationally_related_form	10058411
04135315	_hypernym	03872495
00300317	_hypernym	00299580
09622302	_derivationally_related_form	01775535
07238102	_derivationally_related_form	02636921
07183151	_derivationally_related_form	00869126
02043982	_derivationally_related_form	08612049
00853633	_derivationally_related_form	06778102
14889479	_derivationally_related_form	00239614
01941093	_derivationally_related_form	10433164
00043480	_derivationally_related_form	05714466
08278324	_hypernym	08276342
09861946	_derivationally_related_form	01944692
09747329	_derivationally_related_form	03130073
05658603	_derivationally_related_form	02124748
00724029	_derivationally_related_form	13421462
01190840	_derivationally_related_form	07891726
02274482	_derivationally_related_form	00085678
01020117	_similar_to	01017738
02174311	_derivationally_related_form	07380144
02464342	_hypernym	02463704
07460104	_derivationally_related_form	01914947
00588473	_derivationally_related_form	09759501
00135718	_also_see	01880531
02053941	_verb_group	01849746
00550016	_derivationally_related_form	10318892
01021579	_derivationally_related_form	00958823
01475282	_also_see	01613463
00384620	_derivationally_related_form	00261405
01203676	_derivationally_related_form	02662979
13529616	_derivationally_related_form	02672859
05046471	_hypernym	05046009
01387786	_derivationally_related_form	01741562
00366547	_verb_group	00364868
00858849	_derivationally_related_form	00016380
00076072	_hypernym	00074790
03199901	_has_part	03905730
00231567	_derivationally_related_form	02478059
15166462	_has_part	15169421
08654360	_hypernym	08491826
13622591	_has_part	13622209
00657550	_derivationally_related_form	00874977
00453935	_derivationally_related_form	01140794
00754731	_derivationally_related_form	10672192
04665813	_derivationally_related_form	02529284
02402409	_derivationally_related_form	00215838
01882170	_derivationally_related_form	04544979
00302394	_derivationally_related_form	01941093
14619225	_has_part	09272085
02652494	_derivationally_related_form	10269458
04046810	_derivationally_related_form	01954559
01186208	_hypernym	01194418
00759694	_derivationally_related_form	10702781
00660102	_derivationally_related_form	10506762
15122231	_derivationally_related_form	00490968
08571139	_hypernym	08523483
15166462	_has_part	15169248
04440749	_hypernym	03533972
02519991	_derivationally_related_form	13341756
07847198	_derivationally_related_form	01418037
01242716	_derivationally_related_form	02512922
09889941	_hypernym	10744164
02252931	_derivationally_related_form	01120448
02566227	_derivationally_related_form	10157744
04157320	_derivationally_related_form	01551871
09334396	_derivationally_related_form	02022359
01996735	_derivationally_related_form	08428019
10529965	_derivationally_related_form	01957529
10769321	_derivationally_related_form	02493260
01940403	_derivationally_related_form	10096217
00555648	_derivationally_related_form	02055649
06508816	_derivationally_related_form	01001643
03309465	_has_part	04082886
00239614	_hypernym	00239321
02005756	_derivationally_related_form	04864515
01782218	_derivationally_related_form	07520612
01223182	_derivationally_related_form	13877918
01136614	_derivationally_related_form	03467984
02478059	_derivationally_related_form	00231567
00595146	_derivationally_related_form	10298912
00980908	_derivationally_related_form	05960464
00365188	_derivationally_related_form	00365471
07543288	_derivationally_related_form	01775164
06778102	_derivationally_related_form	00105554
00891216	_derivationally_related_form	10209731
10760340	_derivationally_related_form	02461314
13358549	_hypernym	13384557
00074790	_hypernym	00070965
00452293	_derivationally_related_form	02003601
02994858	_derivationally_related_form	00329831
15165490	_hypernym	15228378
02210119	_verb_group	02236124
00643197	_derivationally_related_form	09790278
02529284	_derivationally_related_form	00066397
00264875	_derivationally_related_form	13426238
00754731	_derivationally_related_form	06513366
01219706	_derivationally_related_form	02886599
08587828	_hypernym	08491826
01765392	_derivationally_related_form	00759551
02046755	_derivationally_related_form	07440979
06201136	_derivationally_related_form	10402086
00882961	_derivationally_related_form	02123672
04660080	_hypernym	05207130
04879658	_derivationally_related_form	00963283
10051975	_derivationally_related_form	00416135
02079525	_derivationally_related_form	05246511
01510827	_derivationally_related_form	07338114
14889479	_hypernym	14865800
10084635	_derivationally_related_form	00800421
09790278	_hypernym	10488016
07246742	_derivationally_related_form	00807461
00087152	_also_see	01922763
07204911	_derivationally_related_form	02473431
10299250	_derivationally_related_form	02592397
07677593	_hypernym	07675627
05714161	_hypernym	05713737
10433737	_derivationally_related_form	01180975
00849080	_derivationally_related_form	10561320
00302394	_derivationally_related_form	01940403
02344243	_hypernym	02344060
00258854	_derivationally_related_form	00199659
01960911	_derivationally_related_form	10683126
01912893	_derivationally_related_form	04544979
02368336	_also_see	02395115
02037272	_also_see	01549291
02738031	_hypernym	04566257
07186148	_derivationally_related_form	01470225
00031820	_also_see	00802136
02395115	_also_see	01073822
02583139	_derivationally_related_form	00962129
04465933	_hypernym	03605722
02523275	_derivationally_related_form	05042871
02657219	_derivationally_related_form	04713428
00070965	_derivationally_related_form	00842538
09759311	_derivationally_related_form	08279298
01522052	_derivationally_related_form	00345641
14425974	_derivationally_related_form	01489722
15159819	_derivationally_related_form	00619183
01570562	_hypernym	01387786
00616857	_derivationally_related_form	10351625
00739270	_derivationally_related_form	00311663
02274482	_derivationally_related_form	09810364
02418205	_derivationally_related_form	05769471
15170786	_has_part	15171008
01857632	_derivationally_related_form	01053339
09366017	_hypernym	09287968
04842515	_derivationally_related_form	01587077
02462580	_verb_group	02461314
02389220	_derivationally_related_form	13939353
02022486	_derivationally_related_form	09334396
04713428	_derivationally_related_form	02657219
00511212	_hypernym	00510189
09879744	_derivationally_related_form	02566227
00321486	_derivationally_related_form	03873064
00259894	_derivationally_related_form	02250625
02924116	_derivationally_related_form	01949110
10002760	_derivationally_related_form	02521410
00135718	_derivationally_related_form	04721650
02055649	_derivationally_related_form	00330160
01522276	_derivationally_related_form	10781984
00922867	_derivationally_related_form	01004582
02667900	_hypernym	02657219
08895771	_instance_hypernym	08524735
15137047	_hypernym	15163005
02700104	_verb_group	02657219
03624966	_derivationally_related_form	01671039
02402409	_hypernym	02405252
