# Supplementary material
Source: ML conference proceedings conference paper supplement (https://proceedings.neurips.cc/paper_files/paper/2021/hash/0fd600c953cde8121262e322ef09f70e-Abstract.html)
Supplement: Supplementary file 1 [file 0fd600c953cde8121262e322ef09f70e-Supplemental.zip › Supplementary_Material_Paper_8745/data/GraIL-BM_WN18RR_v2/test/test-graph.txt]

01489161	_derivationally_related_form	13326198
00657016	_derivationally_related_form	09307300
03058603	_hypernym	03309808
08184600	_hypernym	08182379
02254258	_derivationally_related_form	00228535
09952163	_derivationally_related_form	00482473
00510189	_derivationally_related_form	02491383
07556637	_derivationally_related_form	01167188
02653996	_derivationally_related_form	04411264
00302394	_derivationally_related_form	01451842
09763784	_derivationally_related_form	13931145
00431893	_derivationally_related_form	02418686
13359941	_hypernym	13359690
13982357	_hypernym	13980845
07313241	_hypernym	07313004
02047650	_derivationally_related_form	13878112
07710616	_hypernym	07566863
00609506	_derivationally_related_form	05611302
01370590	_also_see	00957176
05614657	_derivationally_related_form	00589309
02523275	_also_see	02058794
04278605	_derivationally_related_form	02046755
07238102	_hypernym	07234230
04018399	_has_part	02796995
02627221	_derivationally_related_form	14633206
00467717	_derivationally_related_form	13373214
00120010	_hypernym	00119568
09892693	_derivationally_related_form	00589769
10271677	_hypernym	10285135
02196690	_derivationally_related_form	14607521
09334396	_derivationally_related_form	02022486
08675967	_has_part	08615374
08278324	_member_meronym	08278169
01227137	_also_see	02588099
02269894	_hypernym	01143838
14780040	_derivationally_related_form	00238867
00297906	_derivationally_related_form	15129927
01838651	_verb_group	01904293
10221312	_hypernym	09930876
01859325	_hypernym	01858441
02048891	_derivationally_related_form	00342755
13858045	_derivationally_related_form	00869596
08873622	_instance_hypernym	08691669
10478960	_hypernym	10676877
15160579	_derivationally_related_form	00619183
09811852	_derivationally_related_form	01134522
01364184	_verb_group	01679433
00039488	_derivationally_related_form	05259240
00891936	_derivationally_related_form	10149527
02828648	_hypernym	03519981
03224893	_hypernym	03679384
02958017	_derivationally_related_form	08860123
00812526	_derivationally_related_form	01216522
13279262	_derivationally_related_form	02291708
07738353	_derivationally_related_form	01262936
03841666	_hypernym	03953020
02291708	_derivationally_related_form	04612722
13877918	_derivationally_related_form	00362128
02527651	_derivationally_related_form	00076072
07573696	_has_part	07580053
01186208	_derivationally_related_form	07578093
03684823	_has_part	03380461
07678193	_hypernym	07677593
00320681	_verb_group	00321148
02395115	_also_see	02368787
13875571	_derivationally_related_form	01673472
13867276	_derivationally_related_form	01223182
07313241	_derivationally_related_form	00365188
14428160	_hypernym	14429985
03216828	_hypernym	03638321
00914215	_derivationally_related_form	07123288
00416399	_hypernym	00416135
02337667	_derivationally_related_form	05716577
01828736	_derivationally_related_form	05813229
01904293	_verb_group	01874568
02945161	_derivationally_related_form	02653996
01547001	_verb_group	01985029
01944692	_derivationally_related_form	09861946
01418037	_derivationally_related_form	07847198
00284798	_derivationally_related_form	01882170
00458471	_verb_group	00458754
01880531	_also_see	02035337
02527651	_derivationally_related_form	00075618
05816790	_derivationally_related_form	00922867
02194286	_derivationally_related_form	05715283
05259240	_hypernym	05256862
15137676	_hypernym	15118453
10140783	_derivationally_related_form	00657728
01257612	_also_see	02531422
08276720	_member_meronym	08287586
00856860	_derivationally_related_form	04629194
06950209	_hypernym	06947032
14633206	_derivationally_related_form	00369628
10280130	_derivationally_related_form	00595146
02566015	_derivationally_related_form	04645599
04827652	_derivationally_related_form	02037272
01857171	_member_meronym	01857325
08871007	_has_part	08878016
00749574	_hypernym	00732746
09359803	_has_part	09361517
03420559	_derivationally_related_form	01089137
05959954	_derivationally_related_form	03057075
00605310	_derivationally_related_form	07424109
05243704	_hypernym	08657249
00076393	_derivationally_related_form	02174115
01179865	_derivationally_related_form	10042300
05243879	_hypernym	08657249
02542280	_derivationally_related_form	04641153
00910135	_derivationally_related_form	10018021
02671880	_derivationally_related_form	02080577
15234764	_hypernym	15154774
00014742	_hypernym	00014405
00963283	_derivationally_related_form	05960464
13319726	_hypernym	13319032
10042300	_derivationally_related_form	01179865
04426618	_hypernym	04096066
13403331	_derivationally_related_form	02896789
13559409	_derivationally_related_form	00458471
00028565	_derivationally_related_form	05601357
07440979	_derivationally_related_form	02939919
03195485	_hypernym	03679384
00702226	_derivationally_related_form	04438304
00208797	_derivationally_related_form	02401809
00239614	_derivationally_related_form	14889479
15119536	_derivationally_related_form	01731351
09759069	_derivationally_related_form	08280124
15170504	_has_part	15163797
02636921	_hypernym	00930368
14889479	_derivationally_related_form	00274283
02405252	_derivationally_related_form	00208943
05046471	_derivationally_related_form	00341917
00884466	_has_part	00889472
09934921	_derivationally_related_form	13384877
02124748	_derivationally_related_form	04980008
02686568	_has_part	02932019
05524243	_hypernym	05246796
01966861	_also_see	00616498
07181935	_hypernym	07180787
04894037	_derivationally_related_form	01899360
01155421	_derivationally_related_form	03386011
05043973	_hypernym	05042871
02551602	_derivationally_related_form	11083656
06960566	_hypernym	06960298
00330144	_derivationally_related_form	00388210
10149527	_derivationally_related_form	00891936
00366275	_derivationally_related_form	00357680
01684337	_derivationally_related_form	04157320
00853633	_derivationally_related_form	00431005
02653159	_hypernym	02651424
07260623	_hypernym	13577171
05734381	_derivationally_related_form	00851933
10227266	_derivationally_related_form	02100709
00696852	_derivationally_related_form	00891850
01849221	_derivationally_related_form	00280853
03873064	_derivationally_related_form	01576917
13575433	_derivationally_related_form	00458754
00815801	_derivationally_related_form	01941093
01222884	_derivationally_related_form	04873550
15155220	_has_part	15165490
01637633	_derivationally_related_form	05769471
02352019	_derivationally_related_form	00228535
01886407	_also_see	02523275
00231567	_derivationally_related_form	02644622
01168961	_derivationally_related_form	00869596
02592397	_hypernym	01194418
03470387	_hypernym	04216963
00320681	_derivationally_related_form	07678729
13933841	_derivationally_related_form	02028722
05238282	_has_part	05245626
13282550	_hypernym	13282007
00492410	_hypernym	02547225
00431005	_derivationally_related_form	00853633
03691459	_hypernym	03274561
10618848	_derivationally_related_form	08366202
15146545	_synset_domain_topic_of	00704305
06277280	_has_part	06277803
03287733	_has_part	03431745
01675190	_derivationally_related_form	04796490
02519991	_also_see	02672540
00854000	_derivationally_related_form	01425511
01223616	_derivationally_related_form	05257737
00869931	_derivationally_related_form	06508816
13875970	_derivationally_related_form	02687251
01387786	_derivationally_related_form	01149911
11450566	_derivationally_related_form	00506040
05706629	_hypernym	05706228
01475831	_also_see	01483324
00369399	_hypernym	00369802
01800422	_derivationally_related_form	06716796
04902925	_derivationally_related_form	00683185
00015303	_hypernym	00015498
10334567	_derivationally_related_form	09359803
07891726	_derivationally_related_form	00459114
06946497	_derivationally_related_form	02958126
00749767	_derivationally_related_form	02537407
08875547	_instance_hypernym	08540532
02045790	_derivationally_related_form	00342028
13878112	_derivationally_related_form	02047650
02527651	_derivationally_related_form	01134699
01305361	_hypernym	02085742
07181935	_derivationally_related_form	00869126
02329292	_derivationally_related_form	05246511
01740892	_also_see	02512922
01522052	_derivationally_related_form	10781984
08860123	_member_of_domain_usage	10548227
01177033	_derivationally_related_form	00807461
01140794	_derivationally_related_form	02512053
01115411	_derivationally_related_form	00044673
00855295	_derivationally_related_form	06777794
13758745	_derivationally_related_form	02291708
05635188	_derivationally_related_form	01941093
01097031	_derivationally_related_form	05640184
07450343	_derivationally_related_form	00855295
02599939	_derivationally_related_form	08274923
00274283	_derivationally_related_form	14889479
01115411	_hypernym	01111816
00133417	_also_see	01716227
00922867	_derivationally_related_form	05816790
01549291	_also_see	02513740
02085742	_derivationally_related_form	00052146
05945508	_derivationally_related_form	10515194
09759501	_derivationally_related_form	08280124
01424456	_hypernym	01216522
06201136	_derivationally_related_form	10059582
02271137	_derivationally_related_form	10216106
01647867	_derivationally_related_form	06773976
13459322	_synset_domain_topic_of	06055946
08877807	_instance_hypernym	08524735
13560417	_derivationally_related_form	00210259
01924505	_derivationally_related_form	10293332
00074790	_derivationally_related_form	00013172
08544813	_member_meronym	08548733
02237631	_hypernym	02236124
01106272	_derivationally_related_form	01951276
10515194	_derivationally_related_form	00384620
02446651	_also_see	00828779
00095329	_hypernym	00095121
02738701	_derivationally_related_form	02829696
01904293	_verb_group	01838651
01073241	_derivationally_related_form	00859604
07351909	_derivationally_related_form	01349493
02876088	_derivationally_related_form	01895630
01489722	_also_see	01646941
02529284	_derivationally_related_form	04665813
00298041	_derivationally_related_form	06220616
09430771	_instance_hypernym	09411430
01853072	_hypernym	01507175
00123430	_hypernym	00123234
08183398	_hypernym	08182379
00896688	_hypernym	00896348
07618871	_hypernym	07612632
02792552	_derivationally_related_form	01950502
00616153	_derivationally_related_form	10351625
02334867	_derivationally_related_form	02738031
00215838	_derivationally_related_form	02402409
05715283	_derivationally_related_form	02194286
13333237	_derivationally_related_form	02271137
07234230	_derivationally_related_form	00842989
00264875	_derivationally_related_form	14599641
05238282	_has_part	05240211
10612931	_derivationally_related_form	02417504
00429440	_derivationally_related_form	10062996
00653620	_derivationally_related_form	09626238
02461314	_also_see	02473688
01406684	_derivationally_related_form	09334396
13793776	_derivationally_related_form	02636921
00890590	_verb_group	00890100
13969243	_derivationally_related_form	00482473
02738544	_hypernym	02738701
00885925	_derivationally_related_form	01210816
00810557	_derivationally_related_form	00204199
03057021	_derivationally_related_form	00051511
01489989	_derivationally_related_form	00713952
10209731	_hypernym	09777012
01981436	_derivationally_related_form	09433442
03916031	_derivationally_related_form	02126382
01952750	_derivationally_related_form	04096066
05514905	_has_part	05526384
02583780	_hypernym	02583139
01181295	_derivationally_related_form	10763383
00882702	_derivationally_related_form	02191546
03469493	_hypernym	02677718
00800421	_member_meronym	10084635
08544813	_has_part	08556491
13326198	_derivationally_related_form	01489161
00897811	_derivationally_related_form	00696852
09334396	_derivationally_related_form	01406684
00922867	_hypernym	00928015
01845627	_member_meronym	01850676
00537682	_hypernym	00532110
15010703	_derivationally_related_form	01073822
00807461	_derivationally_related_form	07246742
02746365	_derivationally_related_form	01136614
03199647	_hypernym	04081281
13878112	_derivationally_related_form	02048891
00076393	_hypernym	00074790
13382766	_hypernym	13381734
01223833	_hypernym	01223616
04073669	_hypernym	04157320
13279262	_derivationally_related_form	02252931
08518505	_hypernym	08647945
09360122	_hypernym	08617963
01981279	_derivationally_related_form	09334396
08894456	_member_meronym	09747329
03065424	_derivationally_related_form	02049190
07441619	_hypernym	07440979
01612084	_derivationally_related_form	02964389
01155421	_derivationally_related_form	03420559
02686568	_hypernym	03125870
02876088	_derivationally_related_form	05240211
15228378	_derivationally_related_form	02743112
01099436	_derivationally_related_form	02271137
10388440	_derivationally_related_form	05198036
13291189	_derivationally_related_form	02672540
07458453	_hypernym	07456188
01866192	_derivationally_related_form	04101701
00858377	_derivationally_related_form	00015498
00199912	_derivationally_related_form	00095329
15282696	_derivationally_related_form	02055649
07886849	_hypernym	07886572
07800091	_derivationally_related_form	01180206
00113113	_derivationally_related_form	01390616
09626238	_derivationally_related_form	00653620
00869126	_derivationally_related_form	07181935
08254055	_hypernym	08253640
00052146	_derivationally_related_form	02085742
09411430	_has_part	09274500
02253456	_derivationally_related_form	13282550
03872495	_hypernym	03873064
08612340	_hypernym	08616311
08253640	_hypernym	08253815
08875369	_instance_hypernym	08537837
07236077	_hypernym	07234230
00999245	_derivationally_related_form	00295697
07866151	_hypernym	07557434
00203649	_derivationally_related_form	00800930
02447001	_derivationally_related_form	09892831
01093172	_derivationally_related_form	10768585
09892831	_derivationally_related_form	02447001
08250635	_hypernym	08188235
01424456	_derivationally_related_form	00417397
00298041	_derivationally_related_form	10618848
07491981	_hypernym	07555014
00458754	_derivationally_related_form	13575433
01153947	_verb_group	02344243
02896789	_derivationally_related_form	06510977
09424489	_derivationally_related_form	02671880
02653996	_derivationally_related_form	08518171
01983797	_also_see	01227137
13875970	_derivationally_related_form	02098458
00700652	_hypernym	00661091
00085219	_derivationally_related_form	02273293
01322221	_derivationally_related_form	14427239
00013172	_derivationally_related_form	09879744
08871007	_has_part	08877382
03130073	_derivationally_related_form	08894456
13446197	_derivationally_related_form	02673134
02190166	_derivationally_related_form	01940403
04626280	_derivationally_related_form	00853776
10039391	_derivationally_related_form	02566227
00744616	_hypernym	00732746
07710616	_has_part	07711471
13282550	_derivationally_related_form	02250625
01524298	_derivationally_related_form	13774404
00015303	_also_see	00017282
05737153	_derivationally_related_form	00657728
09622302	_derivationally_related_form	01775164
00766234	_derivationally_related_form	02636921
00869126	_hypernym	00869596
09334396	_derivationally_related_form	01981436
00804802	_derivationally_related_form	07181546
00657550	_derivationally_related_form	01003729
00828779	_also_see	02446651
09884391	_derivationally_related_form	01322854
08860123	_derivationally_related_form	02958017
02653159	_derivationally_related_form	02944826
02653996	_derivationally_related_form	01055165
00666058	_also_see	01535709
02124106	_hypernym	02124332
03891051	_hypernym	03589791
05755486	_derivationally_related_form	00482893
08873269	_instance_hypernym	08524735
01551871	_derivationally_related_form	04157320
02250625	_derivationally_related_form	00259643
08890097	_has_part	08881674
03497657	_has_part	03138534
00297906	_derivationally_related_form	15122231
09217230	_hypernym	09287968
02491383	_derivationally_related_form	00510189
08069878	_hypernym	08419984
01424948	_verb_group	01609953
01387786	_derivationally_related_form	00369802
00417001	_verb_group	02672187
01912893	_derivationally_related_form	05003090
14024882	_hypernym	14034177
01775164	_derivationally_related_form	09622302
00618057	_derivationally_related_form	09879744
08891889	_derivationally_related_form	10275249
00238867	_derivationally_related_form	14971519
00328128	_derivationally_related_form	03612814
01265740	_derivationally_related_form	07622261
00417643	_hypernym	00417397
01547390	_derivationally_related_form	01064148
08890097	_has_part	08892766
01239868	_derivationally_related_form	02271137
01765392	_derivationally_related_form	13971561
10435988	_derivationally_related_form	02048891
08276720	_member_meronym	10560352
01111028	_derivationally_related_form	10117511
00764902	_derivationally_related_form	00759551
02274482	_derivationally_related_form	01145015
02579447	_derivationally_related_form	00511212
00768778	_derivationally_related_form	10775379
02513740	_derivationally_related_form	00745637
00482473	_derivationally_related_form	00185104
02834778	_has_part	03796605
01840238	_synset_domain_topic_of	00300441
13650045	_has_part	13649791
01424948	_derivationally_related_form	00417643
09886010	_hypernym	10320863
00247792	_derivationally_related_form	00324231
02405252	_hypernym	02401809
01451842	_verb_group	01941093
01950798	_also_see	01955127
02478059	_derivationally_related_form	10214390
01853498	_hypernym	01852861
02402409	_derivationally_related_form	00215683
02950256	_derivationally_related_form	01134522
08615374	_derivationally_related_form	00492677
01158596	_derivationally_related_form	14708720
01941093	_verb_group	01451842
01949007	_derivationally_related_form	02930766
13650921	_has_part	13650447
08428019	_derivationally_related_form	01919391
10435988	_hypernym	10709529
00614999	_derivationally_related_form	10351625
01954852	_derivationally_related_form	02792552
02194495	_derivationally_related_form	05715864
00075618	_derivationally_related_form	02527651
08691669	_hypernym	08524735
02001858	_derivationally_related_form	10720097
00295697	_derivationally_related_form	03451473
05187446	_hypernym	05177285
02418205	_hypernym	02417504
00782072	_derivationally_related_form	10722965
09359803	_derivationally_related_form	10334567
10095869	_hypernym	10099375
01210816	_derivationally_related_form	02651424
04995531	_hypernym	04995211
00597629	_derivationally_related_form	10474645
02217266	_derivationally_related_form	01098698
02174461	_derivationally_related_form	07380144
01785748	_derivationally_related_form	07537259
02463704	_derivationally_related_form	00741478
08184600	_derivationally_related_form	02064131
02105990	_derivationally_related_form	07512465
01874568	_derivationally_related_form	11527967
02579447	_derivationally_related_form	00271263
01194418	_derivationally_related_form	10186774
10351625	_derivationally_related_form	00614999
01944692	_synset_domain_topic_of	00815801
09701148	_hypernym	09700964
06767693	_derivationally_related_form	00851933
05967097	_derivationally_related_form	10515194
07153727	_derivationally_related_form	00853958
03581125	_hypernym	03605722
09367991	_derivationally_related_form	02632567
10643837	_hypernym	10245639
01010334	_derivationally_related_form	00658052
02043982	_hypernym	02044278
07555014	_hypernym	00026192
01134522	_derivationally_related_form	02950256
01169067	_derivationally_related_form	10132988
04335435	_derivationally_related_form	01945183
02249741	_derivationally_related_form	13282007
00880227	_derivationally_related_form	06695862
01088381	_hypernym	01098869
00199912	_derivationally_related_form	00258854
09351547	_hypernym	09397391
08013453	_instance_hypernym	08392137
01167981	_hypernym	01166351
10655169	_derivationally_related_form	02085742
03719053	_has_part	03718581
01025913	_derivationally_related_form	04660261
08873622	_has_part	08874273
02521410	_derivationally_related_form	10002760
01882170	_derivationally_related_form	05003090
04347519	_hypernym	03701391
10702781	_synset_domain_topic_of	00759694
05517406	_hypernym	05516848
00016380	_derivationally_related_form	00858849
00999787	_hypernym	00999245
09759069	_derivationally_related_form	08279298
02792552	_hypernym	02858304
01072780	_hypernym	01072565
01424456	_derivationally_related_form	00854000
02194286	_derivationally_related_form	05715864
01111816	_derivationally_related_form	13594585
09916209	_hypernym	09893015
02829696	_derivationally_related_form	02033137
00953923	_derivationally_related_form	06767777
04438304	_derivationally_related_form	00490968
01266895	_derivationally_related_form	10118587
01058880	_derivationally_related_form	06767777
03109399	_derivationally_related_form	00094001
05238282	_has_part	05243879
05245192	_hypernym	05244934
01741562	_hypernym	01726692
00259894	_hypernym	00259643
00658052	_derivationally_related_form	01010334
01222884	_also_see	01227137
01602318	_derivationally_related_form	02152212
08524735	_derivationally_related_form	00499642
02725067	_derivationally_related_form	14013005
02579447	_derivationally_related_form	04850996
10248876	_derivationally_related_form	00031820
05524615	_has_part	05526175
14493716	_derivationally_related_form	02317970
01483324	_derivationally_related_form	05008227
00276813	_derivationally_related_form	01537409
04594489	_derivationally_related_form	02354536
02033137	_derivationally_related_form	02829696
10298647	_derivationally_related_form	00595146
02708707	_derivationally_related_form	10744164
04411264	_has_part	03471779
00199912	_derivationally_related_form	00259177
02632567	_derivationally_related_form	10766025
01523986	_derivationally_related_form	13875571
00657016	_derivationally_related_form	07961016
02194495	_derivationally_related_form	05658226
00207728	_derivationally_related_form	00271263
01780941	_derivationally_related_form	01222666
01738347	_derivationally_related_form	01020117
02271137	_derivationally_related_form	01239868
05219724	_has_part	05513807
03420559	_hypernym	03763403
06513366	_derivationally_related_form	00753428
01262936	_derivationally_related_form	10607706
00682436	_derivationally_related_form	01158690
00768778	_derivationally_related_form	06695862
01035199	_derivationally_related_form	09879297
04629604	_derivationally_related_form	01257612
04993413	_synset_domain_topic_of	14589223
10002760	_derivationally_related_form	00910135
09811852	_derivationally_related_form	02950826
02957823	_derivationally_related_form	09688008
04005630	_has_part	02992032
08879388	_instance_hypernym	08633957
01724185	_derivationally_related_form	00550016
04031884	_derivationally_related_form	02653159
10293332	_hypernym	10412055
05717342	_hypernym	05715283
09437454	_hypernym	09287968
01235137	_hypernym	01234729
05514905	_has_part	05517406
01966861	_derivationally_related_form	00120010
07520612	_derivationally_related_form	02506361
00514658	_hypernym	00514128
11449907	_derivationally_related_form	00506040
02644622	_hypernym	02644234
13580723	_derivationally_related_form	01183573
01017738	_similar_to	01020117
01639105	_derivationally_related_form	09934921
06878071	_derivationally_related_form	01067512
01856626	_derivationally_related_form	01318478
02080577	_also_see	00051045
06624161	_has_part	06764623
00159899	_derivationally_related_form	00768778
01003729	_derivationally_related_form	00657728
13650447	_has_part	13650045
02677332	_derivationally_related_form	09435965
14299070	_derivationally_related_form	00071803
07596684	_hypernym	07557165
15159819	_derivationally_related_form	00734927
00280853	_derivationally_related_form	01849221
07313241	_derivationally_related_form	01387786
03540267	_hypernym	03381126
10062996	_derivationally_related_form	01637633
01224744	_derivationally_related_form	00830448
03679986	_hypernym	04571088
01469770	_derivationally_related_form	07186148
02880940	_hypernym	03206908
02001858	_derivationally_related_form	07883860
07424109	_derivationally_related_form	00605310
09790278	_derivationally_related_form	00643197
02673134	_derivationally_related_form	13934900
01589497	_derivationally_related_form	00999245
00695523	_derivationally_related_form	04907991
10454972	_hypernym	09884391
08860123	_member_of_domain_usage	10071332
01547390	_hypernym	01547001
02053941	_hypernym	01849221
01576917	_derivationally_related_form	02911158
01349493	_derivationally_related_form	07351909
02639606	_hypernym	02417504
02079525	_derivationally_related_form	04493505
00874977	_derivationally_related_form	00657728
01153762	_hypernym	01153486
01950502	_derivationally_related_form	02792552
00311663	_also_see	00754873
00358089	_hypernym	00356790
15147850	_derivationally_related_form	00252710
07621776	_hypernym	07621618
01322854	_derivationally_related_form	02666943
13363970	_hypernym	13359690
00616857	_derivationally_related_form	05706629
13112664	_derivationally_related_form	13118569
14599641	_derivationally_related_form	00264875
04441528	_hypernym	03497657
06960298	_hypernym	06941644
01424456	_derivationally_related_form	00417859
13246662	_hypernym	13246475
06276697	_hypernym	06271778
01679433	_verb_group	00542809
00438178	_derivationally_related_form	15282696
14599168	_hypernym	14739360
02669885	_derivationally_related_form	09759311
02672540	_derivationally_related_form	13291189
04137444	_has_part	04257790
00384620	_derivationally_related_form	10515194
02834778	_hypernym	04576211
00272448	_hypernym	00271263
07248653	_derivationally_related_form	02302817
04592741	_hypernym	02688443
07612632	_hypernym	07609840
15159583	_hypernym	15155220
01716227	_also_see	00828779
01387786	_derivationally_related_form	00369399
10112591	_derivationally_related_form	01074650
10702615	_derivationally_related_form	10702781
00713952	_derivationally_related_form	01489989
02671880	_hypernym	02667900
02700104	_hypernym	02657219
14012667	_derivationally_related_form	02417504
07874780	_hypernym	07557434
01945381	_hypernym	01944692
07609840	_hypernym	07556970
00622584	_derivationally_related_form	01144657
01850676	_member_meronym	01851375
02317970	_derivationally_related_form	01150467
01922763	_derivationally_related_form	07515560
00859604	_hypernym	01182293
01156899	_hypernym	01156438
01933305	_derivationally_related_form	10433452
10275249	_derivationally_related_form	08891889
02035337	_also_see	01370590
07313004	_derivationally_related_form	00240571
00490722	_derivationally_related_form	13650447
05658226	_derivationally_related_form	02192992
01134522	_derivationally_related_form	09811852
00509846	_derivationally_related_form	02491383
03130073	_derivationally_related_form	09747329
13934900	_derivationally_related_form	02673134
10118587	_derivationally_related_form	01266895
02493260	_hypernym	02491383
01030022	_derivationally_related_form	05074374
03814112	_has_part	03068181
14563564	_derivationally_related_form	02513740
11527967	_derivationally_related_form	01874568
13766896	_hypernym	13756125
08890097	_has_part	08892971
03024746	_hypernym	03068181
00300317	_derivationally_related_form	03003344
01475282	_also_see	00695523
02270404	_derivationally_related_form	10197967
00854150	_hypernym	02418686
09930876	_hypernym	09940146
01003729	_derivationally_related_form	01614079
02126382	_derivationally_related_form	05714466
10196965	_derivationally_related_form	05152696
01828736	_derivationally_related_form	10058411
09366317	_hypernym	09287968
10655169	_derivationally_related_form	01489989
00238867	_verb_group	00239614
07578093	_derivationally_related_form	01185981
01144657	_derivationally_related_form	00622584
06513764	_hypernym	06513366
02398854	_derivationally_related_form	10271677
07295955	_derivationally_related_form	00229630
06509210	_hypernym	06508816
00183505	_derivationally_related_form	02462580
14599641	_derivationally_related_form	02196690
09952163	_derivationally_related_form	01093587
00505802	_derivationally_related_form	11449907
04854389	_derivationally_related_form	01370590
01696135	_derivationally_related_form	04683136
02653159	_derivationally_related_form	03679384
14989820	_derivationally_related_form	00287258
00450335	_derivationally_related_form	01958615
06698252	_hypernym	06697331
10712573	_derivationally_related_form	02202133
10561613	_derivationally_related_form	01193099
13793776	_derivationally_related_form	02677332
02950482	_derivationally_related_form	01134522
01273263	_derivationally_related_form	04683136
02677332	_derivationally_related_form	13793776
00459114	_derivationally_related_form	13573666
04574999	_derivationally_related_form	01887020
01859496	_hypernym	01858441
04005630	_hypernym	03111690
02363128	_derivationally_related_form	03497657
02466496	_synset_domain_topic_of	01125693
00897026	_synset_domain_topic_of	06892775
05960464	_derivationally_related_form	00963283
08871007	_has_part	09430771
08168117	_hypernym	08167365
15184170	_hypernym	15183802
07186148	_derivationally_related_form	00793580
00343249	_hypernym	00342028
05238282	_has_part	05241072
02055649	_also_see	00438178
09359803	_has_part	09360122
10402086	_derivationally_related_form	06201136
00889555	_derivationally_related_form	06686174
10224098	_derivationally_related_form	00431005
01941093	_derivationally_related_form	09826204
01425709	_derivationally_related_form	00138599
08544813	_member_meronym	08654360
01181295	_verb_group	01180351
01226600	_derivationally_related_form	00854000
13344664	_derivationally_related_form	00891216
01637633	_derivationally_related_form	05769726
00319939	_derivationally_related_form	02000868
07622061	_has_part	07622261
01845627	_member_meronym	01847565
00028565	_hypernym	00034288
08893223	_instance_hypernym	09203827
14012667	_derivationally_related_form	02725067
06778102	_derivationally_related_form	00853958
10021892	_derivationally_related_form	02893338
00598056	_derivationally_related_form	10480730
06700030	_hypernym	06697331
02493260	_derivationally_related_form	00511212
00016380	_hypernym	00014405
14361182	_hypernym	14360459
01489989	_derivationally_related_form	10655169
01679433	_derivationally_related_form	04484160
00589309	_derivationally_related_form	02105990
13934900	_derivationally_related_form	00136800
04242704	_hypernym	02880940
08617963	_derivationally_related_form	02021376
03287733	_derivationally_related_form	10057714
07557434	_has_part	07621776
01387786	_derivationally_related_form	03082807
15235126	_hypernym	15154774
10209731	_derivationally_related_form	00891216
01532329	_derivationally_related_form	04694809
00302394	_hypernym	00300441
02461314	_derivationally_related_form	00183505
02064131	_derivationally_related_form	08184600
00657728	_derivationally_related_form	05737153
05658226	_derivationally_related_form	02868916
03337140	_derivationally_related_form	01001857
00228535	_derivationally_related_form	02254258
10562749	_derivationally_related_form	02167571
02588099	_also_see	01227137
03467984	_has_part	03469493
03916470	_derivationally_related_form	00043480
05714466	_hypernym	05713737
00013172	_derivationally_related_form	00074790
08860123	_has_part	08887841
03498316	_hypernym	02784732
01121855	_derivationally_related_form	02249741
01166351	_derivationally_related_form	00838367
08818835	_instance_hypernym	08524735
08871007	_derivationally_related_form	03003344
02834778	_has_part	02999410
07858595	_hypernym	07809368
02417504	_derivationally_related_form	01065441
02192992	_derivationally_related_form	05715283
07642182	_hypernym	07628870
01053144	_derivationally_related_form	05714894
04906273	_derivationally_related_form	02542795
00490722	_derivationally_related_form	00285557
05046471	_derivationally_related_form	01849746
00315390	_derivationally_related_form	01945381
01537409	_derivationally_related_form	00276813
00969506	_synset_domain_topic_of	06277280
01391280	_hypernym	00463778
10237196	_derivationally_related_form	01431230
00793037	_derivationally_related_form	09961739
00599835	_derivationally_related_form	00076563
07181935	_derivationally_related_form	00804802
00185104	_hypernym	00044673
01765392	_derivationally_related_form	09952163
01156438	_derivationally_related_form	00270215
01726692	_hypernym	01661818
00890100	_derivationally_related_form	10760763
03873064	_derivationally_related_form	01526956
06669384	_hypernym	06667317
07710007	_hypernym	07707451
00811171	_derivationally_related_form	02828648
00506040	_derivationally_related_form	11450566
08041840	_instance_hypernym	00759694
08638260	_hypernym	08633957
03872495	_derivationally_related_form	00321486
04370048	_has_part	03815278
00492410	_derivationally_related_form	05244934
02167571	_derivationally_related_form	10562749
02520509	_derivationally_related_form	02940509
00172732	_derivationally_related_form	01150467
01858989	_member_meronym	01859496
03343853	_hypernym	03467984
08894319	_instance_hypernym	09203827
07676425	_hypernym	07675627
14705718	_derivationally_related_form	01269008
01696135	_derivationally_related_form	04694809
01125429	_also_see	01131043
06702458	_hypernym	06697331
02636921	_derivationally_related_form	13793776
07537259	_derivationally_related_form	01818972
10118382	_derivationally_related_form	00605310
01675190	_also_see	00487653
02331919	_derivationally_related_form	04048568
01547390	_verb_group	01547641
05177285	_hypernym	05174653
00858849	_derivationally_related_form	00015303
02334867	_derivationally_related_form	04565375
01273016	_derivationally_related_form	06855207
07544647	_derivationally_related_form	02530861
01257612	_derivationally_related_form	04629604
01035199	_hypernym	00768778
10224098	_derivationally_related_form	00105554
02523275	_also_see	02094755
05715864	_derivationally_related_form	02191766
01064999	_derivationally_related_form	13381734
03916031	_hypernym	04447443
02919100	_derivationally_related_form	00962129
01547390	_derivationally_related_form	00341548
02124748	_derivationally_related_form	05713737
15228378	_hypernym	15129927
06941644	_hypernym	06904171
07800487	_hypernym	07800091
13344804	_derivationally_related_form	00891216
03542333	_has_part	03542860
02087551	_hypernym	02087122
01912893	_derivationally_related_form	10412055
00666058	_derivationally_related_form	05050379
01153486	_derivationally_related_form	09826074
13278375	_derivationally_related_form	02252931
04980008	_derivationally_related_form	01055073
01912893	_derivationally_related_form	00284798
00657550	_derivationally_related_form	14429608
04146050	_derivationally_related_form	02387910
00261405	_derivationally_related_form	00167934
15137890	_derivationally_related_form	10744164
08895928	_instance_hypernym	09316454
01133825	_derivationally_related_form	00123234
02326695	_also_see	01613463
02395115	_also_see	02368336
01073822	_also_see	02395115
08524735	_has_part	08571139
13969700	_hypernym	13969243
07383823	_derivationally_related_form	01928838
00482893	_derivationally_related_form	05755486
00749767	_hypernym	00749574
00619183	_derivationally_related_form	15160579
01589217	_also_see	01227137
08894456	_instance_hypernym	08558488
04577293	_hypernym	02792552
01904293	_derivationally_related_form	00442115
07832902	_derivationally_related_form	01364184
02958126	_derivationally_related_form	06946497
14449405	_derivationally_related_form	02632353
09702134	_hypernym	09701148
13897996	_derivationally_related_form	02673134
02935658	_hypernym	04081281
13970764	_derivationally_related_form	01765392
03068181	_derivationally_related_form	01215694
02049190	_derivationally_related_form	03065424
00804802	_derivationally_related_form	13982357
00745499	_derivationally_related_form	01009871
00666058	_also_see	01640850
08890097	_member_meronym	09730533
00374668	_derivationally_related_form	05014099
02281485	_derivationally_related_form	07556637
00014742	_also_see	00015806
03763403	_has_part	03763727
05525252	_hypernym	05513302
02864593	_hypernym	03988170
03200357	_derivationally_related_form	01167780
13874073	_hypernym	13873502
03340723	_hypernym	03851341
15137890	_hypernym	15137676
06510977	_hypernym	06509210
02001858	_derivationally_related_form	00320284
15138401	_hypernym	15137890
05074374	_derivationally_related_form	01030022
07578093	_hypernym	07573696
00651954	_derivationally_related_form	01954852
00660102	_derivationally_related_form	10506915
05525807	_hypernym	05236322
08890097	_has_part	08893223
02274482	_derivationally_related_form	00082870
02384686	_verb_group	01469770
07440979	_derivationally_related_form	02043982
07127006	_derivationally_related_form	00031820
02653996	_derivationally_related_form	09889941
04137444	_derivationally_related_form	00969137
02491383	_derivationally_related_form	00509846
01185981	_verb_group	01186208
02253456	_derivationally_related_form	10409634
10478960	_derivationally_related_form	02593354
10217436	_derivationally_related_form	09316454
09907196	_hypernym	10164747
00417859	_hypernym	00417397
02389220	_derivationally_related_form	08683548
02636921	_derivationally_related_form	07238102
01406512	_verb_group	01406356
02964389	_derivationally_related_form	01489989
04341133	_hypernym	04329477
10142747	_hypernym	10143172
10214390	_derivationally_related_form	02478059
02513740	_derivationally_related_form	14563564
00273319	_hypernym	00271263
01840238	_derivationally_related_form	00302394
00658052	_derivationally_related_form	10140783
02346724	_derivationally_related_form	00084371
00589769	_derivationally_related_form	09892693
08876773	_instance_hypernym	08554440
02253456	_also_see	01153947
02196690	_hypernym	02196948
00082870	_derivationally_related_form	02274482
00514871	_derivationally_related_form	15068436
08346655	_hypernym	08342039
01941093	_synset_domain_topic_of	02686568
05524615	_has_part	05382729
09879297	_derivationally_related_form	01035199
08860123	_has_part	08890097
10058411	_derivationally_related_form	01828736
04796490	_derivationally_related_form	01675190
01131043	_also_see	02035337
00362128	_derivationally_related_form	02829696
15155220	_has_part	15167027
13259917	_hypernym	13254985
07246742	_derivationally_related_form	00773285
01537409	_derivationally_related_form	00072261
08504594	_hypernym	08683548
02542795	_derivationally_related_form	01167146
10566072	_derivationally_related_form	01256157
01524298	_derivationally_related_form	08183398
04411264	_hypernym	04191595
01489989	_derivationally_related_form	03679986
02991463	_derivationally_related_form	08337324
01305731	_derivationally_related_form	03216828
01395049	_derivationally_related_form	03959936
01193099	_derivationally_related_form	00840630
08493064	_derivationally_related_form	02812482
00186740	_derivationally_related_form	14798450
00366275	_verb_group	00366547
04659090	_derivationally_related_form	01027263
04578708	_derivationally_related_form	02046755
08276720	_derivationally_related_form	02387910
15160866	_hypernym	15184170
07695965	_hypernym	07712382
15159583	_derivationally_related_form	00734927
08871007	_member_meronym	09701603
02672371	_derivationally_related_form	02651424
10117511	_derivationally_related_form	01111028
09827683	_derivationally_related_form	15145586
07380144	_derivationally_related_form	02174115
00209546	_derivationally_related_form	02473431
05186306	_derivationally_related_form	10672662
02672187	_derivationally_related_form	09626238
03199647	_derivationally_related_form	01167780
00259177	_hypernym	00258854
02551602	_derivationally_related_form	00094001
10452752	_hypernym	10287213
00869931	_derivationally_related_form	03337140
02368336	_also_see	02337667
07234230	_hypernym	06561942
01936537	_derivationally_related_form	04463679
14498404	_derivationally_related_form	00492410
13869327	_hypernym	13867641
00273963	_derivationally_related_form	13552270
05003090	_derivationally_related_form	01906823
13875571	_derivationally_related_form	01523986
07573696	_has_part	07556970
15146004	_synset_domain_topic_of	00704305
09810364	_derivationally_related_form	02275365
07884567	_derivationally_related_form	01158596
06790042	_hypernym	06789411
15170786	_hypernym	15169873
07896994	_hypernym	07891726
02194286	_derivationally_related_form	00882702
04713332	_hypernym	04712735
02354536	_derivationally_related_form	04594489
01606205	_derivationally_related_form	03420559
04236001	_derivationally_related_form	02701445
01509079	_derivationally_related_form	00106272
02249741	_derivationally_related_form	13279262
02047650	_derivationally_related_form	07433145
05737153	_derivationally_related_form	01112364
00148057	_derivationally_related_form	00420132
01957529	_synset_domain_topic_of	00299217
14427239	_derivationally_related_form	09827683
03096960	_derivationally_related_form	01224744
10013242	_derivationally_related_form	01167981
00737536	_derivationally_related_form	00683185
04694809	_derivationally_related_form	01696135
03352961	_hypernym	04500060
00992331	_derivationally_related_form	00619183
01957529	_derivationally_related_form	00299217
01845627	_member_meronym	01856225
00482473	_derivationally_related_form	10160412
02886599	_hypernym	04336034
00962722	_derivationally_related_form	02583780
04879658	_derivationally_related_form	10722965
01489722	_derivationally_related_form	14425974
01321854	_hypernym	01321579
13345286	_hypernym	13344804
00240571	_derivationally_related_form	07313004
02701445	_derivationally_related_form	04236001
04404412	_synset_domain_topic_of	06277280
10242791	_hypernym	10083823
02933304	_derivationally_related_form	05524615
02523275	_also_see	01886407
00609506	_derivationally_related_form	01933305
00812526	_hypernym	00812274
03003344	_derivationally_related_form	06947032
13560417	_hypernym	13456715
08547300	_hypernym	08647945
08873622	_has_part	08876773
13381734	_derivationally_related_form	02311260
00589769	_derivationally_related_form	10298912
09433442	_derivationally_related_form	01981436
00321148	_verb_group	00320681
08366202	_derivationally_related_form	10618848
00356790	_derivationally_related_form	01389329
08286163	_member_meronym	08282696
10515194	_derivationally_related_form	00265386
10435988	_derivationally_related_form	01509079
13298935	_hypernym	13298701
01856553	_hypernym	01855672
03068181	_has_part	03315805
13391452	_hypernym	13388245
07859583	_hypernym	07858595
04666837	_hypernym	04666615
05731568	_derivationally_related_form	00657016
02195470	_derivationally_related_form	07858595
07869937	_hypernym	07557434
01886407	_also_see	02094755
01941093	_derivationally_related_form	00302394
08890097	_has_part	08891595
00812526	_derivationally_related_form	01216004
01914947	_derivationally_related_form	00293916
02194495	_hypernym	02194286
04870643	_derivationally_related_form	10196965
10720097	_derivationally_related_form	02001858
01945381	_synset_domain_topic_of	00815801
00896348	_hypernym	00894552
01190494	_derivationally_related_form	07884567
02196690	_derivationally_related_form	05716744
02123672	_derivationally_related_form	05658603
06667317	_derivationally_related_form	00481739
15227846	_derivationally_related_form	02743112
02478059	_derivationally_related_form	06185748
00084371	_hypernym	00083975
10527334	_derivationally_related_form	02402409
03471779	_hypernym	02886599
00435688	_verb_group	00125078
06483454	_derivationally_related_form	00658052
01498498	_derivationally_related_form	08523483
03519981	_has_part	04466386
02317970	_derivationally_related_form	10409011
04645599	_derivationally_related_form	02566015
10614363	_derivationally_related_form	00028565
07851054	_derivationally_related_form	01262936
10632576	_derivationally_related_form	05705184
01845627	_member_meronym	01850035
00271263	_derivationally_related_form	02579447
04305323	_hypernym	03719053
00311663	_also_see	01899360
06960298	_derivationally_related_form	02957823
00319939	_derivationally_related_form	02001858
02091885	_derivationally_related_form	00285557
07556872	_hypernym	07556637
08877382	_instance_hypernym	08633957
00501479	_hypernym	00499066
01858910	_derivationally_related_form	03032811
01074650	_also_see	02257141
07642471	_hypernym	07597145
00992331	_hypernym	00646833
09918554	_derivationally_related_form	14427065
02544191	_hypernym	02543874
02064131	_derivationally_related_form	08182716
01741562	_derivationally_related_form	01387786
01140794	_derivationally_related_form	00453935
15234764	_has_part	15235126
09612131	_hypernym	10782940
07703889	_hypernym	07874780
10143172	_hypernym	10102369
00842989	_hypernym	00843468
01850035	_hypernym	01507175
08274923	_has_part	08278169
09811852	_derivationally_related_form	01136614
01922763	_also_see	01740892
02693168	_derivationally_related_form	08617963
07460104	_hypernym	07458453
10186774	_derivationally_related_form	01194418
01167981	_derivationally_related_form	08253815
00957176	_also_see	01370590
02047650	_derivationally_related_form	07442068
04484160	_derivationally_related_form	01679806
13421832	_hypernym	13358549
04096733	_hypernym	02819697
09272085	_hypernym	09386422
07543288	_derivationally_related_form	01775535
07722217	_hypernym	07707451
00271263	_derivationally_related_form	01800422
01716227	_also_see	00133417
00369628	_derivationally_related_form	14633206
01613463	_derivationally_related_form	02543181
01256157	_derivationally_related_form	00942234
07177437	_derivationally_related_form	00482893
08954057	_instance_hypernym	09203827
10564800	_derivationally_related_form	02463990
02672859	_derivationally_related_form	13450636
00616153	_derivationally_related_form	04665813
13946760	_derivationally_related_form	00417001
10495555	_derivationally_related_form	02245555
01166351	_also_see	01196802
01949110	_derivationally_related_form	02924116
01765392	_derivationally_related_form	01151097
01193099	_derivationally_related_form	10132988
07886572	_hypernym	07884567
01847565	_member_meronym	01848648
02102398	_verb_group	01957529
03525454	_hypernym	03525827
05513807	_has_part	05331404
01167146	_hypernym	01166926
01222666	_synset_domain_topic_of	00759694
05813229	_derivationally_related_form	01775164
01922895	_derivationally_related_form	10334567
14429985	_derivationally_related_form	00660102
00838367	_has_part	00278810
02836035	_hypernym	04574999
01227137	_also_see	01589217
01305731	_derivationally_related_form	10655169
00189565	_hypernym	00186634
00754873	_derivationally_related_form	00616153
10494935	_derivationally_related_form	02001858
00443231	_derivationally_related_form	01904293
08879680	_instance_hypernym	08633957
07556637	_derivationally_related_form	02281485
03814906	_has_part	03908831
00274283	_derivationally_related_form	13453428
00930368	_derivationally_related_form	05769833
08188235	_hypernym	08246613
01955984	_verb_group	02102398
13138658	_derivationally_related_form	13138308
01950798	_derivationally_related_form	10590339
15155220	_has_part	15164957
02478059	_derivationally_related_form	10365984
00140393	_derivationally_related_form	01510827
05238282	_has_part	05245775
08033194	_instance_hypernym	08392137
00695523	_also_see	02451951
10150940	_derivationally_related_form	02384686
07711080	_hypernym	07710616
00085432	_hypernym	00088481
03933529	_derivationally_related_form	01305241
09759069	_derivationally_related_form	02669885
09433442	_has_part	09217230
04046810	_derivationally_related_form	01936537
00765193	_synset_domain_topic_of	00759694
14455700	_derivationally_related_form	02478059
09893015	_derivationally_related_form	00589769
00510723	_hypernym	00510189
15227846	_has_part	15228162
07456188	_hypernym	07288639
08617963	_derivationally_related_form	02021149
03098140	_has_part	06874688
07800091	_derivationally_related_form	01179865
10785869	_derivationally_related_form	02706816
03191776	_hypernym	02770830
02317970	_derivationally_related_form	14493716
07180787	_derivationally_related_form	00804802
00094001	_derivationally_related_form	02551602
10489944	_derivationally_related_form	00700652
07884567	_derivationally_related_form	00139908
02124748	_derivationally_related_form	00882961
02461314	_derivationally_related_form	00182213
02384940	_derivationally_related_form	10150940
08860123	_member_of_domain_usage	03904183
02657219	_hypernym	02664769
05638778	_derivationally_related_form	09841188
02045790	_derivationally_related_form	02939919
09435965	_derivationally_related_form	02677332
10506915	_derivationally_related_form	00660102
05050115	_hypernym	05046009
05658226	_derivationally_related_form	02395115
10077593	_derivationally_related_form	01775164
03933529	_derivationally_related_form	02331175
15273626	_derivationally_related_form	02701445
05246511	_derivationally_related_form	02079525
03471779	_derivationally_related_form	00271520
02673134	_verb_group	01602318
00453935	_hypernym	00433661
15169873	_has_part	15170504
02188699	_hypernym	02159955
01337653	_derivationally_related_form	07679356
00735389	_hypernym	01273016
01955127	_derivationally_related_form	10017422
07543288	_derivationally_related_form	01828736
01431230	_derivationally_related_form	00854000
00596692	_derivationally_related_form	09906986
04665813	_hypernym	04664964
01364184	_verb_group	00542809
10096217	_derivationally_related_form	01940403
02829696	_derivationally_related_form	02738701
02520509	_derivationally_related_form	13292787
08287586	_member_meronym	10480730
05240211	_has_part	05243704
01849746	_verb_group	02053941
14633206	_hypernym	14622893
09826204	_derivationally_related_form	05635188
08873622	_has_part	04460947
06790042	_derivationally_related_form	00963283
02512922	_derivationally_related_form	01242716
09762385	_derivationally_related_form	00843468
00595146	_derivationally_related_form	10280130
00125078	_verb_group	00435688
10437852	_derivationally_related_form	00844298
00657728	_derivationally_related_form	10140783
05042871	_derivationally_related_form	02523275
01723224	_derivationally_related_form	00894552
00616857	_derivationally_related_form	00418615
10783734	_derivationally_related_form	02354536
05513020	_has_part	05512670
01672607	_derivationally_related_form	04794751
03697109	_hypernym	04329477
02252931	_derivationally_related_form	13278375
00365471	_derivationally_related_form	00365188
05636402	_derivationally_related_form	10693459
02249741	_derivationally_related_form	13282550
00452293	_derivationally_related_form	01144657
00685683	_derivationally_related_form	00076341
00506040	_derivationally_related_form	11449907
14431169	_hypernym	14428160
10474645	_derivationally_related_form	00597629
03881534	_hypernym	03141065
07390945	_derivationally_related_form	02491383
14429985	_derivationally_related_form	00658052
02513740	_also_see	01131043
13986679	_derivationally_related_form	01816431
04544979	_derivationally_related_form	01882170
00510922	_hypernym	00510723
01848976	_hypernym	01846331
00853633	_derivationally_related_form	10224098
00851933	_derivationally_related_form	00425905
07573241	_hypernym	07573103
03916470	_hypernym	03916031
05714466	_derivationally_related_form	02125641
02046755	_derivationally_related_form	00342755
00618057	_derivationally_related_form	00073828
10760763	_derivationally_related_form	00890100
13418047	_hypernym	13417410
01850373	_hypernym	01846331
10536897	_hypernym	10526096
10183757	_derivationally_related_form	02546075
02909006	_derivationally_related_form	00314469
02512053	_hypernym	01473806
07532112	_hypernym	07531255
03150232	_derivationally_related_form	01223616
01483324	_also_see	01476685
10057714	_derivationally_related_form	03684823
01322221	_derivationally_related_form	15145586
14633206	_derivationally_related_form	00373520
13969243	_derivationally_related_form	00483181
09906986	_hypernym	10164747
00851933	_derivationally_related_form	06715786
01364357	_derivationally_related_form	07829412
04216963	_hypernym	03852280
01535709	_also_see	00666058
02236124	_also_see	02346724
01136614	_derivationally_related_form	00123430
04048568	_derivationally_related_form	01950657
00608978	_derivationally_related_form	00073828
08860123	_member_of_domain_usage	15246853
00183505	_derivationally_related_form	02463141
02346895	_derivationally_related_form	08223263
01522276	_also_see	00435688
01223182	_derivationally_related_form	13867276
00293916	_derivationally_related_form	02092309
04159354	_derivationally_related_form	01354006
02344243	_verb_group	01153947
13381734	_hypernym	13377268
00597385	_derivationally_related_form	10280130
10117017	_hypernym	10059582
02743112	_derivationally_related_form	15228378
02021376	_derivationally_related_form	08617963
00342755	_derivationally_related_form	02048891
10760340	_derivationally_related_form	02400760
01224517	_derivationally_related_form	00852922
05050668	_derivationally_related_form	01535709
01020117	_synset_domain_topic_of	06277280
01418037	_hypernym	01418179
03497657	_has_part	03498316
07449862	_hypernym	07447641
02451951	_also_see	02389220
01025913	_derivationally_related_form	04862592
00593219	_derivationally_related_form	10474645
02461314	_verb_group	02462580
00985106	_hypernym	00984609
01716227	_also_see	02395115
00505802	_derivationally_related_form	10783734
05696020	_hypernym	05695806
10162354	_derivationally_related_form	03497657
01406512	_derivationally_related_form	00129089
02639606	_derivationally_related_form	10197967
07491708	_derivationally_related_form	01828736
13291189	_derivationally_related_form	02717831
00853633	_also_see	00851933
04980008	_derivationally_related_form	02641378
10118382	_derivationally_related_form	01821634
00167934	_derivationally_related_form	00261405
01775535	_derivationally_related_form	07543288
01180975	_derivationally_related_form	10433737
00735389	_hypernym	00734927
05635188	_derivationally_related_form	09826204
00233386	_hypernym	00231567
10018021	_derivationally_related_form	02521410
01940403	_derivationally_related_form	02190166
09841188	_derivationally_related_form	05638778
00456740	_derivationally_related_form	05696020
03003344	_derivationally_related_form	08871007
00302394	_derivationally_related_form	01847845
05513807	_has_part	05524615
02111684	_similar_to	02112891
01886407	_also_see	02360448
00431005	_derivationally_related_form	10224098
01167981	_derivationally_related_form	10013242
04827652	_hypernym	04850589
00853958	_hypernym	00853633
01848648	_hypernym	01846331
13384557	_hypernym	13372961
01613463	_also_see	00695523
00962129	_derivationally_related_form	02919100
08874469	_instance_hypernym	08546183
08398036	_derivationally_related_form	01089137
00973077	_has_part	00964343
00741478	_derivationally_related_form	02464342
08552138	_derivationally_related_form	02512150
00123430	_derivationally_related_form	01136614
02055649	_derivationally_related_form	00555648
01125429	_also_see	00229630
03467984	_has_part	04322026
13298011	_hypernym	13296899
02886599	_derivationally_related_form	01219706
01966861	_derivationally_related_form	00129089
14440623	_derivationally_related_form	00207728
10299250	_derivationally_related_form	01194418
10464542	_derivationally_related_form	00596393
02939919	_derivationally_related_form	02045790
08617963	_derivationally_related_form	02693168
00616498	_hypernym	00614999
05527848	_hypernym	05264756
04594489	_derivationally_related_form	00505802
02493260	_derivationally_related_form	10536897
02478059	_hypernym	02477334
02269894	_derivationally_related_form	00945916
00073828	_derivationally_related_form	00618057
05514905	_has_part	05525252
09833441	_hypernym	09917593
13622209	_has_part	13622035
05658226	_derivationally_related_form	02191546
00167934	_verb_group	00384620
01151407	_derivationally_related_form	01765392
01845627	_member_meronym	01852544
02112891	_derivationally_related_form	13428159
00800930	_derivationally_related_form	00203649
00358931	_derivationally_related_form	00560893
09424489	_derivationally_related_form	01183573
04463679	_derivationally_related_form	01954559
00105554	_derivationally_related_form	00431005
01424948	_hypernym	01220303
00914215	_derivationally_related_form	01859325
14008806	_derivationally_related_form	01510827
02237631	_derivationally_related_form	14436875
06778102	_derivationally_related_form	00031820
02686568	_has_part	03061505
08890097	_has_part	08891889
13385913	_hypernym	13372961
03462747	_synset_domain_topic_of	11449907
02950826	_hypernym	03467984
04792357	_derivationally_related_form	00051045
07441619	_derivationally_related_form	01866610
01197338	_derivationally_related_form	01182024
02521410	_derivationally_related_form	10018021
02599939	_derivationally_related_form	08280124
10769321	_derivationally_related_form	02491383
04666837	_derivationally_related_form	01475831
00366547	_verb_group	00366275
02194495	_derivationally_related_form	05715283
00323856	_hypernym	00322847
01950798	_also_see	01955508
06946823	_hypernym	06946497
01151097	_derivationally_related_form	01765392
13530408	_derivationally_related_form	00239321
08895497	_instance_hypernym	08633957
06686174	_derivationally_related_form	00890100
05615147	_hypernym	05614657
06513366	_derivationally_related_form	00754731
01945183	_derivationally_related_form	04335435
10252674	_hypernym	10099375
02718015	_derivationally_related_form	13291189
00458471	_derivationally_related_form	14738752
08182716	_derivationally_related_form	02064131
04545471	_derivationally_related_form	01912893
02123672	_derivationally_related_form	00882961
03612814	_derivationally_related_form	00328128
15145586	_derivationally_related_form	01322221
09952163	_derivationally_related_form	01647867
01193099	_derivationally_related_form	10561613
01850676	_hypernym	01507175
01775164	_derivationally_related_form	10077593
08618379	_hypernym	08520401
02579447	_derivationally_related_form	00272448
10753182	_hypernym	10186774
13650447	_hypernym	13603305
00962129	_derivationally_related_form	02583139
02671880	_derivationally_related_form	01072565
01354006	_verb_group	01353405
01845627	_member_meronym	01857171
01215694	_derivationally_related_form	03024882
08873622	_derivationally_related_form	09704630
02706816	_derivationally_related_form	00695523
00051511	_derivationally_related_form	03058603
05645199	_hypernym	05644922
00442115	_hypernym	00441824
10614363	_derivationally_related_form	01067512
13446197	_derivationally_related_form	00136800
02466132	_derivationally_related_form	01961691
01828736	_hypernym	01777210
15056541	_derivationally_related_form	01372682
07597145	_hypernym	07596684
03461385	_derivationally_related_form	02326198
00891936	_derivationally_related_form	06685456
08276720	_derivationally_related_form	02792903
01775164	_derivationally_related_form	05813229
13417410	_hypernym	13416345
00285557	_derivationally_related_form	00490722
02834778	_derivationally_related_form	09986189
05006898	_derivationally_related_form	00651630
01866192	_also_see	01966706
01150467	_derivationally_related_form	02317661
00095121	_derivationally_related_form	02520509
02651424	_derivationally_related_form	03195485
02044278	_derivationally_related_form	03032811
03541696	_derivationally_related_form	02652494
01926311	_derivationally_related_form	07460104
13617952	_derivationally_related_form	00467717
07186148	_hypernym	06624161
03309465	_hypernym	03656484
05517406	_has_part	05527216
01182293	_derivationally_related_form	01072780
10064229	_synset_domain_topic_of	15259284
01082153	_derivationally_related_form	01173826
01182024	_also_see	00828779
07712382	_hypernym	07557434
04792127	_derivationally_related_form	02080577
13326198	_derivationally_related_form	01951276
15183802	_hypernym	15183428
02944826	_derivationally_related_form	02653996
00854000	_derivationally_related_form	01424948
01828736	_derivationally_related_form	01072072
02035337	_also_see	01880531
08540532	_hypernym	08491826
04468005	_derivationally_related_form	01936537
01852701	_also_see	02676496
01256332	_also_see	01725712
08860123	_member_of_domain_usage	07707451
02743020	_derivationally_related_form	02152212
13559409	_hypernym	13560417
08524735	_has_part	08543496
02202133	_derivationally_related_form	13298701
03905730	_hypernym	03525454
01847845	_verb_group	01941093
05659621	_hypernym	05654052
05526384	_has_part	05513020
00076563	_derivationally_related_form	00599835
02087122	_hypernym	02084071
07237758	_derivationally_related_form	00727991
04592741	_has_part	04087126
02123672	_derivationally_related_form	04980008
00284798	_derivationally_related_form	01912893
05748786	_derivationally_related_form	00730499
02579447	_derivationally_related_form	00273319
00542809	_verb_group	01364184
03479397	_hypernym	03224893
07679356	_derivationally_related_form	01337653
06645039	_derivationally_related_form	02091410
01370590	_derivationally_related_form	04854389
00910135	_derivationally_related_form	10002760
07186148	_derivationally_related_form	01063695
00185104	_derivationally_related_form	00482473
04404412	_derivationally_related_form	00969506
02022486	_hypernym	02087156
08183398	_derivationally_related_form	01524298
00812526	_derivationally_related_form	01574292
08677801	_hypernym	08569165
13971561	_hypernym	13970236
01955984	_derivationally_related_form	10403876
03467984	_has_part	02973017
13982357	_derivationally_related_form	00804802
03274561	_hypernym	04470953
01848123	_hypernym	01846331
01030022	_derivationally_related_form	05257737
02194495	_derivationally_related_form	00882702
00492677	_also_see	02111684
02672371	_hypernym	03679384
05967773	_derivationally_related_form	10084635
00417001	_derivationally_related_form	09626238
03757723	_hypernym	04334599
10100124	_derivationally_related_form	02000868
02530861	_derivationally_related_form	07544647
08544813	_hypernym	08491826
04405907	_has_part	03617594
10193026	_derivationally_related_form	01143838
10057714	_derivationally_related_form	03287733
00851933	_derivationally_related_form	06767693
01398941	_hypernym	01398212
07673397	_hypernym	07672135
03068181	_hypernym	02784218
04468005	_member_meronym	02959942
00683185	_derivationally_related_form	00737536
00293916	_derivationally_related_form	01926984
11527967	_derivationally_related_form	01904293
00085678	_derivationally_related_form	02273293
04334599	_hypernym	04426618
13290676	_derivationally_related_form	02250625
08280124	_derivationally_related_form	09759069
10112591	_derivationally_related_form	13931145
05043973	_derivationally_related_form	02112029
01052248	_derivationally_related_form	04980463
01844859	_synset_domain_topic_of	00300441
04907991	_derivationally_related_form	00695523
01266895	_derivationally_related_form	00713250
02542280	_hypernym	02542795
01489332	_derivationally_related_form	00123234
01542252	_derivationally_related_form	14585519
10512982	_derivationally_related_form	00199912
04852088	_derivationally_related_form	01131043
02099829	_verb_group	02421921
05238282	_has_part	05245192
01950798	_derivationally_related_form	02964389
05240211	_hypernym	08657249
04437953	_has_part	04436675
06960566	_derivationally_related_form	02957823
01322854	_derivationally_related_form	09884391
06697331	_hypernym	06696483
00215838	_hypernym	00215683
01614079	_derivationally_related_form	14429608
13573666	_derivationally_related_form	00459114
02729965	_derivationally_related_form	10117017
00734927	_derivationally_related_form	15159819
15164957	_has_part	15165289
02190166	_hypernym	02188699
08874273	_instance_hypernym	08523483
13409647	_hypernym	13409160
08339454	_hypernym	08077292
02037272	_derivationally_related_form	04827652
07491708	_derivationally_related_form	01820302
09847010	_derivationally_related_form	02317970
00450866	_hypernym	00450335
13719410	_hypernym	13608788
03823540	_hypernym	04005630
03519981	_hypernym	04096066
02531422	_derivationally_related_form	04629604
05658226	_derivationally_related_form	02194495
05769471	_derivationally_related_form	01637633
02270404	_derivationally_related_form	10252674
10193026	_derivationally_related_form	01144657
01088749	_derivationally_related_form	08439955
10566072	_derivationally_related_form	01551871
10140783	_derivationally_related_form	00658052
04980008	_derivationally_related_form	02124748
00186740	_derivationally_related_form	14796969
10480730	_derivationally_related_form	00598056
01140794	_derivationally_related_form	10093658
04466386	_hypernym	03640660
01219993	_derivationally_related_form	02887209
10059582	_derivationally_related_form	06201136
01111816	_derivationally_related_form	10562391
15237567	_derivationally_related_form	02677332
01235137	_derivationally_related_form	02344060
01855672	_hypernym	01845477
02478059	_derivationally_related_form	01240979
01216004	_derivationally_related_form	00812274
02125641	_derivationally_related_form	05713737
02291708	_derivationally_related_form	13279262
06535222	_hypernym	08453464
10565502	_derivationally_related_form	00878052
00324231	_hypernym	00328128
01001643	_derivationally_related_form	03337140
00696852	_derivationally_related_form	00897811
00504592	_also_see	00227507
06056923	_hypernym	06055946
00584954	_derivationally_related_form	04565375
03045337	_hypernym	03863923
00542809	_derivationally_related_form	07678729
00609506	_derivationally_related_form	05762149
07642471	_derivationally_related_form	00212049
02017937	_hypernym	02053941
01853379	_hypernym	01507175
02250625	_derivationally_related_form	13290676
00271520	_derivationally_related_form	03471779
01156438	_derivationally_related_form	01088381
03337140	_derivationally_related_form	01001643
01266945	_derivationally_related_form	01219993
01185981	_derivationally_related_form	00716130
01266895	_derivationally_related_form	10118382
03763727	_hypernym	03679384
01612084	_derivationally_related_form	03679986
10683126	_derivationally_related_form	01960911
10336904	_hypernym	10411551
02048891	_derivationally_related_form	07442068
03616428	_hypernym	04100174
00599472	_derivationally_related_form	10570019
01821634	_derivationally_related_form	10118382
01570562	_derivationally_related_form	03024746
15171008	_hypernym	15157225
10409011	_hypernym	10453357
00343249	_derivationally_related_form	01349493
02302817	_derivationally_related_form	07248653
01087197	_derivationally_related_form	03420559
02112029	_hypernym	02110927
10536897	_derivationally_related_form	02493260
02174115	_derivationally_related_form	00076393
01955508	_hypernym	01950798
07705931	_has_part	07738353
02317970	_hypernym	02317661
04289690	_hypernym	04574999
02812482	_derivationally_related_form	08552138
00285557	_derivationally_related_form	02091885
03694761	_hypernym	03959936
10184822	_hypernym	10287213
05714894	_derivationally_related_form	02124106
00869596	_derivationally_related_form	07183151
08554440	_hypernym	08553535
09827683	_derivationally_related_form	14427239
03003344	_derivationally_related_form	00300317
01135529	_derivationally_related_form	02163301
10252674	_derivationally_related_form	02270404
04024862	_hypernym	02801938
01177703	_derivationally_related_form	02521816
02438861	_derivationally_related_form	01134479
01960911	_derivationally_related_form	10683349
15169421	_hypernym	15228378
08439955	_derivationally_related_form	01088749
01740892	_also_see	01246579
05513807	_hypernym	05509146
02463141	_hypernym	02461314
10655169	_derivationally_related_form	01612084
09359803	_hypernym	09366317
01476685	_derivationally_related_form	05008227
00138599	_derivationally_related_form	01425709
00616153	_derivationally_related_form	00754873
01480149	_verb_group	01480469
00593108	_derivationally_related_form	10474645
07532112	_derivationally_related_form	01183573
06695862	_derivationally_related_form	00880227
08894456	_derivationally_related_form	03130073
05244934	_derivationally_related_form	00492410
07441619	_derivationally_related_form	00143204
10224098	_derivationally_related_form	06778102
00891936	_derivationally_related_form	06686174
06884790	_hypernym	06883073
01526956	_hypernym	01524871
05715864	_derivationally_related_form	02194138
08818835	_instance_hypernym	08633957
07123288	_derivationally_related_form	00914215
10722965	_derivationally_related_form	04879658
05714894	_hypernym	05713737
02834778	_has_part	03616428
14619225	_derivationally_related_form	00330144
02196214	_derivationally_related_form	05717342
01725712	_also_see	00853776
02521816	_derivationally_related_form	00290579
02627221	_derivationally_related_form	14798450
01372682	_derivationally_related_form	02754103
14485064	_derivationally_related_form	01646528
00891216	_verb_group	02672859
02249741	_derivationally_related_form	00259643
01996735	_derivationally_related_form	00290579
10221312	_derivationally_related_form	00854150
00890100	_derivationally_related_form	06686174
08554440	_derivationally_related_form	02804590
09757653	_derivationally_related_form	00421535
07569423	_hypernym	07569106
01887020	_derivationally_related_form	04574999
03399047	_derivationally_related_form	10113362
02344381	_derivationally_related_form	07295629
00695523	_derivationally_related_form	02706816
01373138	_hypernym	01372682
01219706	_derivationally_related_form	02887209
02152212	_derivationally_related_form	02743020
01612084	_derivationally_related_form	10655169
02326695	_derivationally_related_form	04863074
01180351	_derivationally_related_form	13766896
07621618	_derivationally_related_form	01679433
01067512	_derivationally_related_form	06878071
00342755	_hypernym	00342028
01052248	_derivationally_related_form	05714466
01220303	_derivationally_related_form	00812526
02651424	_derivationally_related_form	01210816
14429608	_derivationally_related_form	00657550
01549291	_also_see	01131043
10320863	_hypernym	10069645
00897026	_derivationally_related_form	01723224
02493260	_derivationally_related_form	10769321
00442115	_derivationally_related_form	01960911
02100709	_also_see	01646941
09262690	_hypernym	09468604
10451858	_derivationally_related_form	00492410
01955127	_derivationally_related_form	06682794
02417504	_derivationally_related_form	10612931
00897811	_hypernym	00894552
02506361	_derivationally_related_form	07520612
03933529	_derivationally_related_form	01489734
08524735	_hypernym	08626283
04336034	_derivationally_related_form	00222472
01845627	_member_meronym	01858989
05014099	_derivationally_related_form	00374668
01134238	_derivationally_related_form	00123234
06696483	_derivationally_related_form	02546075
09280380	_hypernym	09274500
13377268	_hypernym	06481156
04995531	_derivationally_related_form	00133417
06777794	_hypernym	06777687
05716577	_derivationally_related_form	02368336
13279262	_derivationally_related_form	02290196
02812482	_derivationally_related_form	08493064
00890590	_derivationally_related_form	06686174
00270215	_derivationally_related_form	01156438
01958615	_hypernym	01957529
00330160	_derivationally_related_form	02055649
02957823	_derivationally_related_form	06960566
02512053	_has_part	02465929
01899360	_derivationally_related_form	04894037
10607706	_derivationally_related_form	01262936
02368787	_also_see	02395115
07631212	_hypernym	07628870
08167953	_hypernym	08167365
09612291	_synset_domain_topic_of	00181781
05737153	_derivationally_related_form	00658052
01364184	_derivationally_related_form	07832902
00962129	_derivationally_related_form	02583780
01131043	_also_see	01549291
10702781	_derivationally_related_form	10702615
09759501	_derivationally_related_form	00588473
02461314	_derivationally_related_form	10760340
04665813	_derivationally_related_form	00616153
10535706	_hypernym	09772029
02021149	_derivationally_related_form	08617963
14409489	_hypernym	14408086
02543181	_derivationally_related_form	01179707
00606093	_derivationally_related_form	00894552
10489944	_derivationally_related_form	06056923
01523986	_derivationally_related_form	13875970
15227846	_has_part	15234764
01602318	_hypernym	01601234
01093587	_hypernym	00764902
00969506	_derivationally_related_form	04404412
01679433	_derivationally_related_form	07621618
06946497	_hypernym	06941644
10472799	_derivationally_related_form	08558488
00123234	_derivationally_related_form	01134238
00014742	_derivationally_related_form	05681117
14374432	_synset_domain_topic_of	06055946
10409634	_derivationally_related_form	02253456
08871007	_instance_hypernym	08696931
05525100	_hypernym	05524615
13358549	_derivationally_related_form	02218635
00957176	_derivationally_related_form	00744616
01849746	_hypernym	01849221
10062996	_hypernym	09993901
01845627	_member_meronym	01851996
00745637	_derivationally_related_form	02513740
02188699	_has_part	02152212
10287213	_hypernym	09624168
10024119	_hypernym	10582154
13453428	_derivationally_related_form	00274283
01480149	_derivationally_related_form	09609561
02743112	_derivationally_related_form	15227846
10744164	_derivationally_related_form	02708707
01134699	_derivationally_related_form	02527651
01672014	_derivationally_related_form	03624966
00511041	_derivationally_related_form	02493260
00752493	_also_see	01469770
02055649	_derivationally_related_form	05058140
00492677	_derivationally_related_form	04764741
00963283	_derivationally_related_form	02402409
13326198	_hypernym	13325010
02270165	_hypernym	02270815
15235126	_has_part	15236338
07237758	_derivationally_related_form	00842989
02048891	_derivationally_related_form	10435988
05611302	_derivationally_related_form	00609506
00485711	_derivationally_related_form	04764741
10023656	_hypernym	10402086
01292727	_hypernym	01292534
00869126	_derivationally_related_form	07183151
10672908	_derivationally_related_form	05186306
00051511	_derivationally_related_form	03057021
07573696	_has_part	07557434
08860123	_member_of_domain_usage	04217546
04201733	_hypernym	02814533
10781984	_derivationally_related_form	01522276
00773285	_derivationally_related_form	07246742
05526384	_has_part	05526957
04101701	_derivationally_related_form	01866192
02673134	_derivationally_related_form	14002279
01125693	_synset_domain_topic_of	06535222
03971422	_hypernym	04440749
01246579	_also_see	01740892
02754103	_derivationally_related_form	00330144
04713118	_derivationally_related_form	02700104
10515194	_derivationally_related_form	05967097
00314469	_derivationally_related_form	02909006
10500942	_hypernym	10299250
04216963	_has_part	03309465
02958126	_derivationally_related_form	06950528
10506762	_hypernym	10622053
01954852	_derivationally_related_form	00651954
01176567	_hypernym	01176232
15169873	_has_part	15157041
05748786	_derivationally_related_form	00661213
01840238	_verb_group	01941093
08877208	_instance_hypernym	08524735
01531265	_hypernym	01531742
07751451	_hypernym	07705931
01182293	_derivationally_related_form	01073241
03141065	_derivationally_related_form	01844859
08871007	_has_part	08879680
06595351	_has_part	06258228
01370590	_also_see	02037272
01574292	_derivationally_related_form	00447540
10766025	_derivationally_related_form	02632567
07551052	_hypernym	00026192
09612131	_derivationally_related_form	00869596
02834778	_has_part	02836035
08890097	_has_part	08954057
06778102	_derivationally_related_form	10224098
14842992	_derivationally_related_form	01292727
07795598	_hypernym	07775375
00891216	_hypernym	00891936
02126382	_derivationally_related_form	04980008
00072261	_derivationally_related_form	01537409
04980008	_derivationally_related_form	02126382
04995211	_derivationally_related_form	01716227
07442068	_derivationally_related_form	02048891
01820302	_derivationally_related_form	01072072
02195470	_hypernym	02196948
10672192	_hypernym	10437852
10208189	_hypernym	10476671
00768778	_derivationally_related_form	06696025
09879744	_derivationally_related_form	02527651
00843468	_derivationally_related_form	07234230
10632576	_hypernym	10020890
09433442	_hypernym	09287968
01852701	_derivationally_related_form	08521816
01679806	_derivationally_related_form	04484160
08871007	_has_part	08877807
00343249	_derivationally_related_form	02048891
04994413	_hypernym	04992163
00029025	_derivationally_related_form	10147262
01850192	_hypernym	01846331
08890097	_instance_hypernym	08696931
15227846	_has_part	15228267
13428159	_derivationally_related_form	02112891
03895866	_hypernym	02959942
07460104	_derivationally_related_form	02092309
02102398	_verb_group	01955984
02091410	_derivationally_related_form	00285557
01269008	_derivationally_related_form	14705718
15273955	_derivationally_related_form	00014742
00542809	_verb_group	01679433
07209305	_derivationally_related_form	00804802
00962129	_derivationally_related_form	10210137
02513740	_similar_to	02515214
04638585	_hypernym	04637923
07832902	_hypernym	07829412
00800421	_derivationally_related_form	10084635
02345272	_derivationally_related_form	04730580
00514871	_derivationally_related_form	02446651
00843468	_derivationally_related_form	06561942
05258299	_derivationally_related_form	01223833
07186661	_derivationally_related_form	02384686
07580053	_hypernym	07557434
01724185	_derivationally_related_form	10318892
01866192	_derivationally_related_form	07441619
15159819	_hypernym	15155220
03059366	_hypernym	02934168
15246853	_hypernym	15122231
07858595	_derivationally_related_form	02195470
07515790	_hypernym	07515560
02381726	_derivationally_related_form	00082870
06790042	_derivationally_related_form	00980908
01781983	_hypernym	01780941
10002760	_derivationally_related_form	02521816
02037272	_also_see	01370590
00812526	_derivationally_related_form	01222328
09934921	_derivationally_related_form	01639105
02053941	_derivationally_related_form	07310507
00842989	_derivationally_related_form	00766234
08284481	_hypernym	08276720
01716227	_derivationally_related_form	04995211
02687251	_derivationally_related_form	13875970
00596692	_derivationally_related_form	09907196
10064046	_hypernym	10287213
10781984	_derivationally_related_form	01522052
09626238	_derivationally_related_form	00889831
02636921	_derivationally_related_form	00766234
03206908	_derivationally_related_form	01180351
08342670	_hypernym	08342039
08871007	_has_part	08879388
02836035	_has_part	04283378
02326198	_derivationally_related_form	03461385
00922867	_derivationally_related_form	00999787
02360448	_also_see	01886407
02091410	_derivationally_related_form	06645039
00793037	_derivationally_related_form	01230850
06185748	_derivationally_related_form	02478059
02003601	_derivationally_related_form	00452293
00969137	_derivationally_related_form	04137444
07441619	_derivationally_related_form	01887020
04137444	_derivationally_related_form	02043982
01064148	_derivationally_related_form	00026385
02088627	_derivationally_related_form	07380144
10508475	_hypernym	09957156
04463679	_derivationally_related_form	01503268
00329831	_derivationally_related_form	08521816
05264247	_hypernym	05264081
15282696	_derivationally_related_form	00438178
09302616	_hypernym	09366317
03624966	_hypernym	03816849
00015498	_derivationally_related_form	15273626
10237196	_hypernym	09622302
01263018	_derivationally_related_form	02527651
04993882	_derivationally_related_form	02196690
04638585	_derivationally_related_form	01182293
00695523	_also_see	01613463
02236124	_verb_group	02210119
10018021	_derivationally_related_form	00804802
01850035	_member_meronym	01850373
01093172	_derivationally_related_form	13981403
01919391	_derivationally_related_form	00290579
03024882	_derivationally_related_form	01570562
01480469	_verb_group	01480149
13875970	_derivationally_related_form	01523986
01828736	_derivationally_related_form	07491708
08491826	_hypernym	08552138
01353405	_derivationally_related_form	04159058
07380144	_derivationally_related_form	02174311
02301825	_derivationally_related_form	00082870
08877382	_instance_hypernym	08524735
05611684	_hypernym	05611302
02530861	_also_see	01074650
03195485	_derivationally_related_form	02652494
02126022	_hypernym	02125641
00658052	_derivationally_related_form	14429985
02401809	_derivationally_related_form	00208797
15163797	_hypernym	15137047
00620424	_has_part	00223854
00853633	_derivationally_related_form	10221312
14002279	_derivationally_related_form	01602318
15166462	_hypernym	15164957
00265386	_derivationally_related_form	10515194
02673134	_derivationally_related_form	13897996
05695806	_hypernym	05695554
00186634	_derivationally_related_form	01111816
02636921	_derivationally_related_form	07237758
01223616	_derivationally_related_form	05259240
00851933	_derivationally_related_form	05734381
01637633	_derivationally_related_form	09993901
01186208	_verb_group	01185981
02754103	_derivationally_related_form	01372682
09893191	_hypernym	09943239
02035337	_also_see	01131043
01176232	_verb_group	02261642
08069878	_derivationally_related_form	02261464
00804802	_derivationally_related_form	07181935
02651424	_derivationally_related_form	02672371
15273955	_hypernym	15273626
00129089	_derivationally_related_form	01966861
09307300	_derivationally_related_form	01385920
01053144	_derivationally_related_form	04980656
00438178	_derivationally_related_form	05058140
06781383	_derivationally_related_form	00105778
07944050	_hypernym	07943480
00015498	_hypernym	00014742
14428160	_derivationally_related_form	00658052
01073241	_derivationally_related_form	02570267
01406684	_verb_group	01406356
02521410	_derivationally_related_form	01177033
08612049	_hypernym	08616311
10280130	_derivationally_related_form	00597385
01089137	_derivationally_related_form	03420559
[truncated: 2,011 more rows]
