# Supplementary material
Source: ML conference proceedings conference paper supplement (https://proceedings.neurips.cc/paper_files/paper/2021/hash/0fd600c953cde8121262e322ef09f70e-Abstract.html)
Supplement: Supplementary file 1 [file 0fd600c953cde8121262e322ef09f70e-Supplemental.zip › Supplementary_Material_Paper_8745/data/GraIL-BM_WN18RR_v2/test/test-random-sample/test0.txt]

08858942	_has_part	08890097	1
15228162	_similar_to	09218641	0
01725712	_derivationally_related_form	07480896	1
02094755	_has_part	10209731	0
02542280	_derivationally_related_form	01203676	1
08285896	_hypernym	01041762	0
10515194	_derivationally_related_form	05945508	1
02094755	_has_part	14455700	0
01958615	_derivationally_related_form	00299217	1
07531255	_also_see	14426449	0
01398212	_hypernym	14989820	1
01906823	_hypernym	00419950	0
02112891	_hypernym	02112029	1
01021579	_member_meronym	03519578	0
04695963	_derivationally_related_form	01537409	1
02639606	_instance_hypernym	01547001	0
02491383	_derivationally_related_form	10526096	1
01041762	_instance_hypernym	03003344	0
10489944	_hypernym	10707233	1
00891850	_member_of_domain_usage	02334867	0
01856225	_member_meronym	01856553	1
01740892	_synset_domain_topic_of	13650045	0
05748786	_derivationally_related_form	02666882	1
05924920	_instance_hypernym	13459322	0
00812526	_derivationally_related_form	01572978	1
00596393	_synset_domain_topic_of	00186634	0
01949110	_hypernym	01955984	1
02094755	_member_meronym	02112891	0
02064131	_derivationally_related_form	13774404	1
04390873	_derivationally_related_form	14426449	0
09334396	_derivationally_related_form	01502762	1
01041762	_synset_domain_topic_of	09437454	0
09688008	_derivationally_related_form	02957823	1
10160412	_also_see	10209731	0
05715864	_derivationally_related_form	02194495	1
03420559	_instance_hypernym	01063695	0
04926427	_hypernym	04924103	1
00140393	_derivationally_related_form	05731568	0
14798450	_derivationally_related_form	02627221	1
02092309	_instance_hypernym	09218641	0
01098869	_derivationally_related_form	01156438	1
02639606	_member_meronym	02639606	0
01926984	_verb_group	02099829	1
00815173	_derivationally_related_form	07204401	0
02964389	_derivationally_related_form	01612084	1
04390873	_hypernym	07234230	0
07635155	_hypernym	07628870	1
01740892	_has_part	03150232	0
13291189	_derivationally_related_form	02543874	1
02672859	_similar_to	03003344	0
00753428	_hypernym	00752493	1
02094755	_has_part	04005630	0
01144657	_derivationally_related_form	00452293	1
03451473	_hypernym	01150200	0
01131043	_also_see	01125429	1
00609506	_member_of_domain_usage	09218641	0
01073241	_derivationally_related_form	01182293	1
05011790	_hypernym	02094755	0
01074650	_also_see	02530861	1
01906823	_instance_hypernym	00765193	0
10488016	_hypernym	10632576	1
00815173	_derivationally_related_form	04005630	0
02632567	_derivationally_related_form	14493426	1
02331175	_member_of_domain_usage	05091316	0
08277805	_derivationally_related_form	09759311	1
14622893	_hypernym	01150200	0
05050379	_hypernym	05050115	1
10183757	_derivationally_related_form	03764822	0
00470084	_derivationally_related_form	00233386	1
13421832	_synset_domain_topic_of	14622893	0
02666943	_derivationally_related_form	01322854	1
05074374	_has_part	14455700	0
08873622	_has_part	08597023	1
00609506	_has_part	14989820	0
01781983	_derivationally_related_form	14405931	1
03003344	_has_part	07944050	0
00299217	_derivationally_related_form	01958615	1
02958126	_derivationally_related_form	15119536	0
06220616	_hypernym	06212839	1
02632353	_synset_domain_topic_of	08617963	0
01904293	_derivationally_related_form	09281777	1
14426449	_verb_group	03420559	0
00481739	_derivationally_related_form	06667317	1
09218641	_derivationally_related_form	09218641	0
01182293	_derivationally_related_form	04638585	1
00657016	_instance_hypernym	13594585	0
02046755	_derivationally_related_form	13878112	1
14455700	_instance_hypernym	02334867	0
07813107	_derivationally_related_form	00213353	1
13650045	_derivationally_related_form	00596393	0
00467717	_derivationally_related_form	05924920	1
09437454	_verb_group	01150200	0
09759311	_derivationally_related_form	02669885	1
05731568	_member_meronym	09218641	0
00409211	_derivationally_related_form	02443849	1
02958126	_derivationally_related_form	02326198	0
01775535	_hypernym	01775164	1
07204401	_has_part	03121897	0
10672662	_derivationally_related_form	05186306	1
00765193	_instance_hypernym	08280124	0
05707146	_derivationally_related_form	00614999	1
03121897	_member_of_domain_usage	00891850	0
02519991	_derivationally_related_form	00259643	1
01121855	_member_meronym	08617963	0
01845627	_member_meronym	01855672	1
03451473	_hypernym	13594585	0
01390616	_derivationally_related_form	00113113	1
07204401	_has_part	07944050	0
14299070	_derivationally_related_form	00091124	1
06685456	_derivationally_related_form	07531255	0
01955508	_derivationally_related_form	00121645	1
01135529	_similar_to	00815173	0
01389329	_derivationally_related_form	00616083	1
08280124	_also_see	00891850	0
00596393	_derivationally_related_form	10464542	1
10535706	_member_meronym	00419950	0
00601822	_derivationally_related_form	00180770	1
07234230	_member_of_domain_usage	10535706	0
02530861	_also_see	00853776	1
08280124	_verb_group	01063695	0
00560893	_derivationally_related_form	00358931	1
14405931	_instance_hypernym	02964389	0
01856748	_hypernym	01507175	1
14426449	_synset_domain_topic_of	02958126	0
08877208	_instance_hypernym	08633957	1
04390873	_instance_hypernym	00186634	0
06682794	_derivationally_related_form	01955127	1
05091316	_also_see	03451473	0
13855627	_derivationally_related_form	00661213	1
01150200	_member_meronym	03624966	0
00838367	_derivationally_related_form	01179865	1
01906823	_hypernym	03467984	0
03150232	_derivationally_related_form	01522276	1
04713692	_verb_group	07234230	0
01073822	_derivationally_related_form	04993413	1
08617963	_member_meronym	02092309	0
01944692	_derivationally_related_form	02858304	1
00140393	_has_part	02950482	0
00350889	_hypernym	00350461	1
01527271	_instance_hypernym	00874977	0
02478059	_derivationally_related_form	14455700	1
02639606	_member_of_domain_usage	01527271	0
07238102	_derivationally_related_form	02677332	1
02331175	_synset_domain_topic_of	00874977	0
09424489	_derivationally_related_form	01816431	1
04390873	_derivationally_related_form	00765193	0
02887209	_hypernym	04336034	1
10140783	_similar_to	05011790	0
13580723	_derivationally_related_form	01193721	1
09218641	_member_of_domain_usage	08555333	0
10093658	_derivationally_related_form	01140794	1
13650045	_derivationally_related_form	02112891	0
00330160	_derivationally_related_form	00438178	1
03467984	_also_see	00657016	0
13552270	_derivationally_related_form	00239614	1
01850192	_instance_hypernym	10183757	0
01224744	_verb_group	00597385	1
14455700	_also_see	03624966	0
05219724	_has_part	05514905	1
02094755	_synset_domain_topic_of	01945381	0
01354006	_derivationally_related_form	14705718	1
00657016	_has_part	02639606	0
01234345	_derivationally_related_form	00421535	1
00290579	_derivationally_related_form	14426449	0
04576211	_has_part	04574999	1
03150232	_has_part	05924920	0
02270165	_derivationally_related_form	10330189	1
00290579	_hypernym	07234230	0
00044673	_derivationally_related_form	00417001	1
05091316	_member_of_domain_usage	02326198	0
02250625	_derivationally_related_form	13282550	1
13970764	_instance_hypernym	01906823	0
00891216	_derivationally_related_form	13344804	1
07204401	_hypernym	03150232	0
00182213	_derivationally_related_form	02461314	1
10160412	_verb_group	07531255	0
14622893	_has_part	14619225	1
08280124	_member_meronym	14989820	0
05238282	_has_part	05244934	1
00186634	_also_see	00815173	0
05174653	_derivationally_related_form	02519991	1
00765193	_instance_hypernym	02112891	0
13282550	_derivationally_related_form	02519991	1
02672859	_has_part	14426449	0
03933529	_derivationally_related_form	02085742	1
01740892	_member_meronym	08555333	0
00366547	_derivationally_related_form	00357680	1
02332999	_synset_domain_topic_of	00140393	0
02519991	_derivationally_related_form	13290676	1
01121855	_synset_domain_topic_of	01856225	0
01493897	_derivationally_related_form	14425974	1
02639606	_derivationally_related_form	08280124	0
04828255	_derivationally_related_form	01782519	1
00419950	_has_part	01781983	0
08277805	_hypernym	08276720	1
03003344	_also_see	10209731	0
01406356	_verb_group	01406512	1
01887020	_member_meronym	03121897	0
01487311	_hypernym	01488956	1
15165490	_verb_group	02094755	0
04980656	_derivationally_related_form	01053144	1
01856225	_synset_domain_topic_of	01021579	0
15129927	_hypernym	05816790	1
14426449	_instance_hypernym	02950482	0
01537409	_derivationally_related_form	05244934	1
00889472	_hypernym	00290579	0
02531422	_also_see	00856860	1
13970764	_member_meronym	02672859	0
05003090	_derivationally_related_form	01882170	1
02126022	_hypernym	09218641	0
02125641	_derivationally_related_form	05714466	1
00651630	_member_of_domain_usage	04005630	0
00113113	_derivationally_related_form	01754105	1
03003344	_also_see	02334867	0
00695523	_also_see	01475282	1
15119536	_verb_group	09274500	0
00658052	_derivationally_related_form	01009871	1
00290579	_verb_group	00186634	0
06561942	_derivationally_related_form	00844298	1
15228162	_also_see	02632353	0
02235666	_verb_group	02537407	1
01906823	_member_meronym	02126022	0
13874073	_derivationally_related_form	00417001	1
01945381	_synset_domain_topic_of	10535706	0
14971519	_derivationally_related_form	00238867	1
00651630	_member_meronym	14405931	0
02291708	_synset_domain_topic_of	13333237	1
07944050	_hypernym	02092309	0
01150467	_hypernym	01150200	1
08280124	_similar_to	03451473	0
13282550	_derivationally_related_form	02253456	1
13459322	_member_of_domain_usage	03764822	0
13720096	_hypernym	13716084	1
02950482	_has_part	09218641	0
01167780	_derivationally_related_form	03200357	1
07531255	_hypernym	01740892	0
01475282	_also_see	02451951	1
01856225	_verb_group	06685456	0
10330189	_derivationally_related_form	02269894	1
02632567	_hypernym	05074374	0
08612049	_has_part	08495617	1
10535706	_hypernym	03121897	0
00105778	_derivationally_related_form	09930876	1
02331175	_similar_to	02112891	0
10478960	_derivationally_related_form	02163301	1
03451473	_hypernym	04005630	0
00842989	_derivationally_related_form	09762385	1
01150200	_verb_group	14405931	0
01097031	_derivationally_related_form	08397255	1
02639606	_similar_to	03121897	0
00657728	_derivationally_related_form	00874977	1
04005630	_member_meronym	02331175	0
02196690	_derivationally_related_form	14599641	1
02326198	_also_see	03467984	0
01684337	_derivationally_related_form	00937656	1
14405931	_similar_to	13650045	0
00980908	_derivationally_related_form	06790042	1
01740892	_has_part	10676018	0
00658052	_derivationally_related_form	06483454	1
14622893	_verb_group	08153874	0
05659365	_hypernym	05659621	1
02329883	_derivationally_related_form	04390873	0
01074650	_derivationally_related_form	10112591	1
07531255	_member_of_domain_usage	03150232	0
02072501	_derivationally_related_form	13649791	1
01135529	_derivationally_related_form	08153874	0
01227137	_also_see	01370590	1
02520509	_hypernym	01887020	0
00800930	_hypernym	00685683	1
10535706	_synset_domain_topic_of	02092309	0
02250625	_derivationally_related_form	00259894	1
02677332	_instance_hypernym	00815173	0
13573666	_hypernym	13575433	1
00815173	_verb_group	05731568	0
07551052	_derivationally_related_form	00859604	1
15119536	_instance_hypernym	03121897	0
05527216	_has_part	05525628	1
02126022	_instance_hypernym	01150200	0
00590148	_derivationally_related_form	09906986	1
02326198	_verb_group	02672859	0
09334396	_derivationally_related_form	01292727	1
03519578	_has_part	07234230	0
00859604	_derivationally_related_form	01073241	1
08153874	_verb_group	03519578	0
00843468	_derivationally_related_form	06730780	1
01850192	_hypernym	13459322	0
09203827	_member_meronym	09316454	1
03624966	_member_of_domain_usage	00366547	0
00239614	_verb_group	00238867	1
02402409	_verb_group	01135529	0
01958615	_synset_domain_topic_of	00450335	1
05074374	_derivationally_related_form	00765193	0
02700104	_derivationally_related_form	00552841	1
15119536	_synset_domain_topic_of	05074374	0
01960911	_derivationally_related_form	00442115	1
15119536	_member_meronym	08617963	0
04236001	_hypernym	03895866	1
02329883	_has_part	01906823	0
06685456	_derivationally_related_form	00890100	1
00609506	_also_see	01547001	0
00365188	_verb_group	00365647	1
14989820	_verb_group	01527271	0
07450343	_hypernym	07447641	1
01150200	_verb_group	15228162	0
08871007	_has_part	08877208	1
10160412	_synset_domain_topic_of	01716227	0
00622584	_derivationally_related_form	01143838	1
14405931	_verb_group	00815173	0
06767777	_derivationally_related_form	01058880	1
13970764	_instance_hypernym	09274500	0
01820302	_derivationally_related_form	07491981	1
02950482	_has_part	09274500	0
10293332	_derivationally_related_form	01924505	1
08285896	_also_see	02520509	0
09759311	_derivationally_related_form	08280124	1
08280124	_also_see	02402409	0
02080577	_derivationally_related_form	02671880	1
13421832	_instance_hypernym	00290579	0
00622266	_derivationally_related_form	01574292	1
00874977	_also_see	01945381	0
04493505	_derivationally_related_form	02079525	1
02332999	_also_see	05924920	0
03216828	_derivationally_related_form	01305731	1
01856225	_also_see	00815173	0
00657550	_derivationally_related_form	05737153	1
00186634	_instance_hypernym	01041762	0
13969243	_derivationally_related_form	02700104	1
14405931	_derivationally_related_form	09274500	0
09612291	_derivationally_related_form	00869596	1
01021579	_member_of_domain_usage	00140393	0
01526956	_derivationally_related_form	03872495	1
01716227	_also_see	14622893	0
02672540	_derivationally_related_form	00259643	1
01527271	_also_see	00140393	0
02058794	_also_see	02523275	1
07204401	_member_meronym	03451473	0
05524615	_hypernym	05525252	1
01945381	_synset_domain_topic_of	00596393	0
05014099	_derivationally_related_form	00328128	1
03624966	_derivationally_related_form	00889472	0
02191766	_derivationally_related_form	05715864	1
13650045	_verb_group	02329883	0
00812274	_derivationally_related_form	01216004	1
03420559	_derivationally_related_form	10160412	0
10298912	_derivationally_related_form	00595146	1
02672859	_verb_group	02520509	0
01216522	_derivationally_related_form	00812526	1
08153874	_member_meronym	14622893	0
00299580	_derivationally_related_form	05755486	1
08285896	_synset_domain_topic_of	08555333	0
00085678	_derivationally_related_form	02274482	1
07204401	_similar_to	01887020	0
01547641	_verb_group	01547390	1
08280124	_verb_group	02334867	0
15183428	_hypernym	15157225	1
08555333	_instance_hypernym	03467984	0
06200010	_derivationally_related_form	00350461	1
00815173	_member_of_domain_usage	05924920	0
01027263	_derivationally_related_form	04659090	1
02672859	_similar_to	02334867	0
02085742	_derivationally_related_form	10655169	1
04390873	_derivationally_related_form	05731568	0
01158690	_derivationally_related_form	00467717	1
02092309	_derivationally_related_form	07204401	0
00851933	_derivationally_related_form	01224517	1
01906823	_has_part	14426449	0
00259643	_derivationally_related_form	02519991	1
03150232	_member_of_domain_usage	10183757	0
09826204	_derivationally_related_form	01941093	1
02331175	_instance_hypernym	02174461	0
13876371	_derivationally_related_form	02738544	1
04005630	_synset_domain_topic_of	14455700	0
02120458	_derivationally_related_form	00513401	1
02329883	_member_meronym	14426449	0
01524298	_hypernym	01524871	1
10676018	_member_of_domain_usage	00186634	0
02653996	_derivationally_related_form	02945161	1
00858849	_derivationally_related_form	01781983	0
10058411	_derivationally_related_form	01820302	1
07944050	_synset_domain_topic_of	00874977	0
02834778	_has_part	04289690	1
14426449	_synset_domain_topic_of	13594585	0
02446164	_derivationally_related_form	00583461	1
00140393	_member_of_domain_usage	01945381	0
00015303	_derivationally_related_form	00858849	1
04713692	_hypernym	02094755	0
00842989	_derivationally_related_form	07234230	1
03519578	_hypernym	04390873	0
00320486	_derivationally_related_form	02001858	1
15228162	_instance_hypernym	04390873	0
00963241	_hypernym	00962129	1
03624966	_derivationally_related_form	03121897	0
00356790	_derivationally_related_form	01387786	1
07944050	_also_see	01021579	0
14585519	_derivationally_related_form	00330144	1
02092309	_verb_group	01887020	0
01354405	_derivationally_related_form	04049405	1
00140393	_member_of_domain_usage	02632353	0
15145586	_has_part	15146545	1
00140393	_member_of_domain_usage	00609506	0
02163301	_derivationally_related_form	01135529	1
02126022	_also_see	15228162	0
04854389	_hypernym	04827652	1
02329883	_instance_hypernym	02964389	0
01385920	_derivationally_related_form	09307300	1
07944050	_has_part	03420559	0
00937656	_derivationally_related_form	01551871	1
03420559	_verb_group	08617963	0
02326695	_also_see	02451951	1
02632567	_hypernym	13650045	0
13279262	_hypernym	13281275	1
05011790	_synset_domain_topic_of	01021579	0
01179865	_derivationally_related_form	07800091	1
03121897	_member_meronym	00140393	0
13875970	_derivationally_related_form	00143204	1
13421832	_member_of_domain_usage	10676018	0
01940403	_derivationally_related_form	00302394	1
02112891	_verb_group	01547001	0
00061290	_derivationally_related_form	01955127	1
02326198	_member_of_domain_usage	13421832	0
01951276	_derivationally_related_form	13326198	1
03150232	_has_part	02632353	0
00467717	_derivationally_related_form	13617952	1
13459322	_member_meronym	15119536	0
02632567	_hypernym	02632353	1
13459322	_instance_hypernym	15228162	0
00963283	_derivationally_related_form	00963241	1
01887020	_similar_to	02632353	0
01432601	_derivationally_related_form	10395073	1
03519578	_has_part	01850192	0
01193099	_hypernym	01166351	1
13594585	_hypernym	00609506	0
01961691	_synset_domain_topic_of	00441824	1
01121855	_synset_domain_topic_of	02964389	0
00443231	_hypernym	00442115	1
08617963	_verb_group	02092309	0
13649791	_hypernym	13603305	1
00596393	_similar_to	02126022	0
05058140	_derivationally_related_form	00438178	1
02639606	_also_see	14989820	0
01273263	_derivationally_related_form	02784732	1
02331175	_hypernym	01121855	0
01131043	_also_see	02037272	1
05011790	_derivationally_related_form	02112891	0
00136800	_derivationally_related_form	13446197	1
02334867	_also_see	02329883	0
01510827	_derivationally_related_form	14008806	1
08153874	_derivationally_related_form	02632353	0
00683185	_also_see	01880531	1
02094755	_member_of_domain_usage	05731568	0
00073828	_hypernym	00070965	1
00290579	_synset_domain_topic_of	13650045	0
01640850	_also_see	00666058	1
09218641	_derivationally_related_form	02672859	0
00658052	_derivationally_related_form	14429608	1
09274500	_synset_domain_topic_of	02677332	0
04565375	_derivationally_related_form	01087197	1
10676018	_similar_to	02126022	0
02123672	_derivationally_related_form	05713737	1
01527271	_has_part	00858849	0
04046810	_hypernym	04048568	1
01135529	_also_see	01150200	0
01958615	_synset_domain_topic_of	00299217	1
08617963	_also_see	03420559	0
07480068	_hypernym	00026192	1
00657016	_similar_to	01547001	0
03933529	_derivationally_related_form	01305731	1
01781983	_verb_group	01021579	0
08894456	_has_part	08895928	1
04390873	_instance_hypernym	03150232	0
01193099	_derivationally_related_form	01073655	1
14455700	_verb_group	05091316	0
02261464	_derivationally_related_form	08069878	1
00815173	_synset_domain_topic_of	00596393	0
01073655	_hypernym	01073241	1
04390873	_derivationally_related_form	02958126	0
01535709	_also_see	01640850	1
01121855	_derivationally_related_form	00596393	0
00854000	_derivationally_related_form	01226600	1
05074374	_verb_group	14622893	0
03000447	_derivationally_related_form	13575433	1
01716227	_similar_to	00891850	0
10527334	_hypernym	10503452	1
01781983	_similar_to	00186634	0
01840238	_derivationally_related_form	10096217	1
14455700	_member_of_domain_usage	03150232	0
00890100	_derivationally_related_form	06685456	1
02174461	_instance_hypernym	05731568	0
13282007	_derivationally_related_form	02249741	1
13650045	_similar_to	02639606	0
00014742	_derivationally_related_form	15273626	1
04390873	_hypernym	00290579	0
14798450	_hypernym	15010703	1
01716227	_has_part	14405931	0
00208943	_derivationally_related_form	02405252	1
00815173	_derivationally_related_form	07531255	0
02667228	_hypernym	02666882	1
07531255	_verb_group	02126022	0
02332999	_derivationally_related_form	07556637	1
07234230	_hypernym	00657016	0
01100145	_derivationally_related_form	10782791	1
00657016	_hypernym	13459322	0
14493426	_derivationally_related_form	02632567	1
01121855	_also_see	14405931	0
09361517	_hypernym	09437454	1
00290579	_synset_domain_topic_of	10183757	0
01235258	_derivationally_related_form	01153486	1
00815173	_also_see	01063695	0
00852922	_hypernym	00849080	1
00889472	_member_meronym	08280124	0
00841628	_derivationally_related_form	01193721	1
00858849	_hypernym	09274500	0
01167981	_derivationally_related_form	03200357	1
14455700	_member_meronym	01945381	0
00619183	_derivationally_related_form	15159819	1
02326198	_hypernym	10140783	0
01854415	_hypernym	01852861	1
00815173	_synset_domain_topic_of	00140393	0
09906848	_hypernym	10474645	1
00815173	_synset_domain_topic_of	08555333	0
13858045	_hypernym	13857486	1
02632567	_has_part	03764822	0
01845627	_member_meronym	01854047	1
02639606	_has_part	03003344	0
00105778	_derivationally_related_form	00513401	1
01527271	_member_of_domain_usage	02112891	0
01510827	_derivationally_related_form	00409211	1
02174461	_has_part	09274500	0
01100145	_derivationally_related_form	10782940	1
03150232	_derivationally_related_form	13421832	0
01639105	_derivationally_related_form	03772269	1
14622893	_member_of_domain_usage	01021579	0
02384686	_derivationally_related_form	07186148	1
14622893	_hypernym	01945381	0
14436875	_derivationally_related_form	02237631	1
02332999	_hypernym	05924920	0
14429608	_hypernym	14429985	1
01121855	_instance_hypernym	00596393	0
01182024	_derivationally_related_form	01197338	1
02639606	_similar_to	03451473	0
00459114	_hypernym	00458754	1
03420559	_verb_group	01527271	0
05645199	_derivationally_related_form	00609100	1
02332999	_verb_group	10140783	0
10768585	_derivationally_related_form	01093172	1
00891850	_member_of_domain_usage	14622893	0
00609506	_derivationally_related_form	01941093	1
00858849	_also_see	02672859	0
01820302	_derivationally_related_form	10058411	1
15165490	_member_of_domain_usage	07531255	0
04135315	_hypernym	03872495	1
03150232	_synset_domain_topic_of	13970764	0
00300317	_hypernym	00299580	1
00290579	_similar_to	01740892	0
09622302	_derivationally_related_form	01775535	1
01887020	_member_of_domain_usage	15119536	0
07238102	_derivationally_related_form	02636921	1
14405931	_similar_to	08153874	0
07183151	_derivationally_related_form	00869126	1
02520509	_member_meronym	00609506	0
02043982	_derivationally_related_form	08612049	1
00609506	_hypernym	14405931	0
00853633	_derivationally_related_form	06778102	1
01781983	_synset_domain_topic_of	07234230	0
14889479	_derivationally_related_form	00239614	1
06685456	_member_of_domain_usage	01150200	0
01941093	_derivationally_related_form	10433164	1
07234230	_member_of_domain_usage	00609506	0
00043480	_derivationally_related_form	05714466	1
00366547	_synset_domain_topic_of	03150232	0
08278324	_hypernym	08276342	1
00657016	_similar_to	13459322	0
09861946	_derivationally_related_form	01944692	1
05091316	_verb_group	03150232	0
09747329	_derivationally_related_form	03130073	1
02964389	_verb_group	02094755	0
05658603	_derivationally_related_form	02124748	1
04390873	_member_meronym	15165490	0
00724029	_derivationally_related_form	13421462	1
07944050	_has_part	02326198	0
01190840	_derivationally_related_form	07891726	1
06685456	_hypernym	08153874	0
02274482	_derivationally_related_form	00085678	1
02332999	_member_of_domain_usage	00366547	0
01020117	_similar_to	01017738	1
07204401	_member_of_domain_usage	08153874	0
02174311	_derivationally_related_form	07380144	1
09274500	_similar_to	08285896	0
02464342	_hypernym	02463704	1
02950482	_instance_hypernym	01887020	0
07460104	_derivationally_related_form	01914947	1
00186634	_verb_group	15165490	0
00588473	_derivationally_related_form	09759501	1
07204401	_member_of_domain_usage	01547001	0
00135718	_also_see	01880531	1
00651630	_derivationally_related_form	13421832	0
02053941	_verb_group	01849746	1
01021579	_has_part	03003344	0
00550016	_derivationally_related_form	10318892	1
02958126	_instance_hypernym	03624966	0
01021579	_derivationally_related_form	00958823	1
07531255	_similar_to	00874977	0
01475282	_also_see	01613463	1
10535706	_synset_domain_topic_of	02964389	0
00384620	_derivationally_related_form	00261405	1
00891850	_member_of_domain_usage	02092309	0
01203676	_derivationally_related_form	02662979	1
02332999	_member_meronym	02094755	0
13529616	_derivationally_related_form	02672859	1
04005630	_has_part	01150200	0
05046471	_hypernym	05046009	1
15228162	_derivationally_related_form	02639606	0
01387786	_derivationally_related_form	01741562	1
05731568	_member_meronym	03624966	0
00366547	_verb_group	00364868	1
01906823	_member_of_domain_usage	09218641	0
00858849	_derivationally_related_form	00016380	1
02112891	_synset_domain_topic_of	10140783	0
00076072	_hypernym	00074790	1
00651630	_synset_domain_topic_of	13421832	0
03199901	_has_part	03905730	1
08617963	_verb_group	00290579	0
00231567	_derivationally_related_form	02478059	1
06685456	_synset_domain_topic_of	04005630	0
15166462	_has_part	15169421	1
02126022	_synset_domain_topic_of	02632567	0
08654360	_hypernym	08491826	1
08153874	_member_meronym	00596393	0
13622591	_has_part	13622209	1
00596393	_instance_hypernym	02950482	0
00657550	_derivationally_related_form	00874977	1
01527271	_member_of_domain_usage	00891850	0
00453935	_derivationally_related_form	01140794	1
05091316	_member_meronym	00657016	0
00754731	_derivationally_related_form	10672192	1
02094755	_has_part	13459322	0
04665813	_derivationally_related_form	02529284	1
01781983	_also_see	01121855	0
02402409	_derivationally_related_form	00215838	1
05924920	_similar_to	03003344	0
01882170	_derivationally_related_form	04544979	1
02632567	_similar_to	15228162	0
00302394	_derivationally_related_form	01941093	1
00657016	_synset_domain_topic_of	08285896	0
14619225	_has_part	09272085	1
02958126	_verb_group	00596393	0
02652494	_derivationally_related_form	10269458	1
02332999	_has_part	07944050	0
04046810	_derivationally_related_form	01954559	1
13459322	_verb_group	02672859	0
01186208	_hypernym	01194418	1
02112891	_member_of_domain_usage	03624966	0
00759694	_derivationally_related_form	10702781	1
04390873	_has_part	01041762	0
00660102	_derivationally_related_form	10506762	1
10140783	_similar_to	02672859	0
15122231	_derivationally_related_form	00490968	1
04713692	_similar_to	13594585	0
08571139	_hypernym	08523483	1
01547001	_derivationally_related_form	03150232	0
15166462	_has_part	15169248	1
10676018	_instance_hypernym	02326198	0
04440749	_hypernym	03533972	1
10160412	_derivationally_related_form	01547001	0
02519991	_derivationally_related_form	13341756	1
01041762	_instance_hypernym	00765193	0
07847198	_derivationally_related_form	01418037	1
00858849	_also_see	14989820	0
01242716	_derivationally_related_form	02512922	1
00290579	_member_meronym	01150200	0
09889941	_hypernym	10744164	1
09218641	_instance_hypernym	13459322	0
02252931	_derivationally_related_form	01120448	1
01887020	_derivationally_related_form	00874977	0
02566227	_derivationally_related_form	10157744	1
02964389	_verb_group	03519578	0
04157320	_derivationally_related_form	01551871	1
02964389	_verb_group	04005630	0
09334396	_derivationally_related_form	02022359	1
07944050	_member_meronym	09437454	0
01996735	_derivationally_related_form	08428019	1
00891850	_similar_to	05091316	0
10529965	_derivationally_related_form	01957529	1
01906823	_verb_group	02632353	0
10769321	_derivationally_related_form	02493260	1
02094755	_instance_hypernym	03467984	0
01940403	_derivationally_related_form	10096217	1
00657016	_verb_group	07944050	0
00555648	_derivationally_related_form	02055649	1
00596393	_member_of_domain_usage	01041762	0
06508816	_derivationally_related_form	01001643	1
01121855	_similar_to	02632567	0
03309465	_has_part	04082886	1
08285896	_hypernym	03467984	0
00239614	_hypernym	00239321	1
07234230	_has_part	13459322	0
02005756	_derivationally_related_form	04864515	1
14989820	_hypernym	05924920	0
01782218	_derivationally_related_form	07520612	1
03467984	_also_see	01716227	0
01223182	_derivationally_related_form	13877918	1
14426449	_also_see	08280124	0
01136614	_derivationally_related_form	03467984	1
07204401	_has_part	02092309	0
02478059	_derivationally_related_form	00231567	1
02639606	_synset_domain_topic_of	03420559	0
00595146	_derivationally_related_form	10298912	1
05731568	_member_of_domain_usage	02326198	0
00980908	_derivationally_related_form	05960464	1
04713692	_member_of_domain_usage	03451473	0
00365188	_derivationally_related_form	00365471	1
03764822	_hypernym	08285896	0
07543288	_derivationally_related_form	01775164	1
03467984	_synset_domain_topic_of	13421832	0
06778102	_derivationally_related_form	00105554	1
00765193	_hypernym	05091316	0
00891216	_derivationally_related_form	10209731	1
00889472	_verb_group	01063695	0
10760340	_derivationally_related_form	02461314	1
08617963	_similar_to	08555333	0
13358549	_hypernym	13384557	1
13594585	_instance_hypernym	01856225	0
00074790	_hypernym	00070965	1
05011790	_synset_domain_topic_of	00140393	0
00452293	_derivationally_related_form	02003601	1
00290579	_synset_domain_topic_of	02094755	0
02994858	_derivationally_related_form	00329831	1
05011790	_member_of_domain_usage	01135529	0
15165490	_hypernym	15228378	1
08555333	_has_part	10676018	0
02210119	_verb_group	02236124	1
01063695	_verb_group	02094755	0
00643197	_derivationally_related_form	09790278	1
01945381	_member_of_domain_usage	07531255	0
02529284	_derivationally_related_form	00066397	1
02964389	_hypernym	09274500	0
00264875	_derivationally_related_form	13426238	1
01887020	_synset_domain_topic_of	02329883	0
00754731	_derivationally_related_form	06513366	1
02402409	_hypernym	00651630	0
01219706	_derivationally_related_form	02886599	1
03467984	_verb_group	01906823	0
08587828	_hypernym	08491826	1
01850192	_hypernym	05011790	0
01765392	_derivationally_related_form	00759551	1
02174461	_also_see	00858849	0
02046755	_derivationally_related_form	07440979	1
00815173	_verb_group	14405931	0
06201136	_derivationally_related_form	10402086	1
01887020	_has_part	14989820	0
00882961	_derivationally_related_form	02123672	1
00290579	_derivationally_related_form	13421832	0
04660080	_hypernym	05207130	1
02677332	_instance_hypernym	10676018	0
04879658	_derivationally_related_form	00963283	1
13970764	_has_part	01041762	0
10051975	_derivationally_related_form	00416135	1
08153874	_also_see	01887020	0
02079525	_derivationally_related_form	05246511	1
02964389	_hypernym	10535706	0
01510827	_derivationally_related_form	07338114	1
05011790	_has_part	08280124	0
14889479	_hypernym	14865800	1
10183757	_instance_hypernym	02329883	0
10084635	_derivationally_related_form	00800421	1
02964389	_has_part	03420559	0
09790278	_hypernym	10488016	1
01856225	_has_part	02677332	0
07246742	_derivationally_related_form	00807461	1
13459322	_similar_to	08280124	0
00087152	_also_see	01922763	1
02094755	_similar_to	08285896	0
07204911	_derivationally_related_form	02473431	1
01945381	_has_part	00858849	0
10299250	_derivationally_related_form	02592397	1
08617963	_similar_to	01856225	0
07677593	_hypernym	07675627	1
07944050	_similar_to	00140393	0
05714161	_hypernym	05713737	1
01135529	_hypernym	01781983	0
10433737	_derivationally_related_form	01180975	1
02632353	_has_part	03519578	0
00849080	_derivationally_related_form	10561320	1
07234230	_derivationally_related_form	00419950	0
00302394	_derivationally_related_form	01940403	1
01547001	_derivationally_related_form	01740892	0
02344243	_hypernym	02344060	1
03624966	_synset_domain_topic_of	15119536	0
00258854	_derivationally_related_form	00199659	1
02326198	_also_see	01740892	0
01960911	_derivationally_related_form	10683126	1
01547001	_instance_hypernym	10160412	0
01912893	_derivationally_related_form	04544979	1
00657016	_hypernym	01021579	0
02368336	_also_see	02395115	1
02639606	_instance_hypernym	02094755	0
02037272	_also_see	01549291	1
01527271	_verb_group	00815173	0
02738031	_hypernym	04566257	1
01781983	_verb_group	10140783	0
07186148	_derivationally_related_form	01470225	1
03624966	_derivationally_related_form	15119536	0
00031820	_also_see	00802136	1
01716227	_member_of_domain_usage	00366547	0
02395115	_also_see	01073822	1
10160412	_similar_to	01041762	0
02583139	_derivationally_related_form	00962129	1
07204401	_derivationally_related_form	03003344	0
04465933	_hypernym	03605722	1
00140393	_synset_domain_topic_of	01945381	0
02523275	_derivationally_related_form	05042871	1
03519578	_similar_to	14405931	0
02657219	_derivationally_related_form	04713428	1
14405931	_hypernym	05924920	0
00070965	_derivationally_related_form	00842538	1
00186634	_member_of_domain_usage	03121897	0
09759311	_derivationally_related_form	08279298	1
00609506	_has_part	08555333	0
01522052	_derivationally_related_form	00345641	1
02331175	_instance_hypernym	03150232	0
14425974	_derivationally_related_form	01489722	1
03420559	_similar_to	02334867	0
15159819	_derivationally_related_form	00619183	1
02958126	_member_of_domain_usage	10535706	0
01570562	_hypernym	01387786	1
13594585	_hypernym	08153874	0
00616857	_derivationally_related_form	10351625	1
01121855	_hypernym	01906823	0
00739270	_derivationally_related_form	00311663	1
13421832	_similar_to	14426449	0
02274482	_derivationally_related_form	09810364	1
01740892	_member_of_domain_usage	14426449	0
02418205	_derivationally_related_form	05769471	1
01945381	_derivationally_related_form	00186634	0
15170786	_has_part	15171008	1
13421832	_member_of_domain_usage	08280124	0
01857632	_derivationally_related_form	01053339	1
04005630	_similar_to	00651630	0
09366017	_hypernym	09287968	1
02402409	_similar_to	08555333	0
04842515	_derivationally_related_form	01587077	1
00874977	_instance_hypernym	01716227	0
02462580	_verb_group	02461314	1
03150232	_verb_group	15228162	0
02389220	_derivationally_related_form	13939353	1
03121897	_instance_hypernym	15165490	0
02022486	_derivationally_related_form	09334396	1
14622893	_verb_group	09437454	0
04713428	_derivationally_related_form	02657219	1
01063695	_also_see	00891850	0
00511212	_hypernym	00510189	1
00140393	_has_part	09274500	0
09879744	_derivationally_related_form	02566227	1
13970764	_synset_domain_topic_of	09437454	0
00321486	_derivationally_related_form	03873064	1
00657016	_instance_hypernym	08285896	0
00259894	_derivationally_related_form	02250625	1
13650045	_similar_to	02958126	0
02924116	_derivationally_related_form	01949110	1
00889472	_member_of_domain_usage	14426449	0
10002760	_derivationally_related_form	02521410	1
05011790	_synset_domain_topic_of	04713692	0
00135718	_derivationally_related_form	04721650	1
01887020	_similar_to	14989820	0
02055649	_derivationally_related_form	00330160	1
01021579	_similar_to	04390873	0
01522276	_derivationally_related_form	10781984	1
15119536	_hypernym	00891850	0
00922867	_derivationally_related_form	01004582	1
03624966	_also_see	10140783	0
02667900	_hypernym	02657219	1
04713692	_verb_group	03121897	0
08895771	_instance_hypernym	08524735	1
10160412	_similar_to	15119536	0
15137047	_hypernym	15163005	1
04713692	_hypernym	00657016	0
02700104	_verb_group	02657219	1
04390873	_verb_group	10209731	0
03624966	_derivationally_related_form	01671039	1
02174461	_derivationally_related_form	03003344	0
02402409	_hypernym	02405252	1
02632353	_member_of_domain_usage	09218641	0
