# Supplementary material
Source: ML conference proceedings conference paper supplement (https://proceedings.neurips.cc/paper_files/paper/2021/hash/0fd600c953cde8121262e322ef09f70e-Abstract.html)
Supplement: Supplementary file 1 [file 0fd600c953cde8121262e322ef09f70e-Supplemental.zip › Supplementary_Material_Paper_8745/data/GraIL-BM_WN18RR_v2/test/test-random-sample/test3.txt]

08858942	_has_part	08890097	1
10683126	_hypernym	05257737	0
01725712	_derivationally_related_form	07480896	1
06946497	_similar_to	02028722	0
02542280	_derivationally_related_form	01203676	1
00356790	_verb_group	06883073	0
10515194	_derivationally_related_form	05945508	1
10782791	_has_part	03065424	0
01958615	_derivationally_related_form	00299217	1
14622893	_verb_group	08153874	0
01398212	_hypernym	14989820	1
04499660	_member_meronym	02911158	0
02112891	_hypernym	02112029	1
05924920	_also_see	00596393	0
04695963	_derivationally_related_form	01537409	1
08167779	_verb_group	03479397	0
02491383	_derivationally_related_form	10526096	1
00015303	_also_see	01765392	0
10489944	_hypernym	10707233	1
04782116	_similar_to	10782791	0
01856225	_member_meronym	01856553	1
15228162	_derivationally_related_form	01716227	0
05748786	_derivationally_related_form	02666882	1
07204401	_similar_to	02463704	0
00812526	_derivationally_related_form	01572978	1
09302616	_instance_hypernym	09810364	0
01949110	_hypernym	01955984	1
02334867	_similar_to	03467984	0
02064131	_derivationally_related_form	13774404	1
06877578	_synset_domain_topic_of	04782116	0
09334396	_derivationally_related_form	01502762	1
11450566	_similar_to	02669885	0
09688008	_derivationally_related_form	02957823	1
09437454	_hypernym	03467984	0
05715864	_derivationally_related_form	02194495	1
05245775	_instance_hypernym	05198036	0
04926427	_hypernym	04924103	1
00891850	_also_see	07944050	0
14798450	_derivationally_related_form	02627221	1
05243879	_synset_domain_topic_of	01177703	0
01098869	_derivationally_related_form	01156438	1
00450866	_verb_group	07775375	0
01926984	_verb_group	02099829	1
04520480	_derivationally_related_form	05959954	0
02964389	_derivationally_related_form	01612084	1
04863074	_also_see	02551602	0
07635155	_hypernym	07628870	1
00589769	_has_part	06882561	0
13291189	_derivationally_related_form	02543874	1
03479397	_synset_domain_topic_of	09302616	0
00753428	_hypernym	00752493	1
02994858	_verb_group	02237631	0
01144657	_derivationally_related_form	00452293	1
04792127	_synset_domain_topic_of	09810364	0
01131043	_also_see	01125429	1
01354405	_verb_group	10717921	0
01073241	_derivationally_related_form	01182293	1
10702615	_member_of_domain_usage	00964105	0
01074650	_also_see	02530861	1
01856225	_similar_to	10183757	0
10488016	_hypernym	10632576	1
04792127	_also_see	06877578	0
02632567	_derivationally_related_form	14493426	1
14989820	_has_part	09218641	0
08277805	_derivationally_related_form	09759311	1
04520480	_instance_hypernym	02463141	0
05050379	_hypernym	05050115	1
08280124	_has_part	01041762	0
00470084	_derivationally_related_form	00233386	1
01954559	_has_part	07432973	0
02666943	_derivationally_related_form	01322854	1
09274500	_similar_to	02094755	0
08873622	_has_part	08597023	1
13757724	_member_of_domain_usage	08276342	0
01781983	_derivationally_related_form	14405931	1
00470084	_synset_domain_topic_of	02384940	0
00299217	_derivationally_related_form	01958615	1
03216828	_synset_domain_topic_of	00356790	0
06220616	_hypernym	06212839	1
00953923	_similar_to	07752264	0
01904293	_derivationally_related_form	09281777	1
02672859	_member_meronym	03150232	0
00481739	_derivationally_related_form	06667317	1
14299336	_derivationally_related_form	01222666	0
01182293	_derivationally_related_form	04638585	1
00167934	_synset_domain_topic_of	00167934	0
02046755	_derivationally_related_form	13878112	1
02402409	_derivationally_related_form	02094755	0
07813107	_derivationally_related_form	00213353	1
08402828	_hypernym	02210119	0
00467717	_derivationally_related_form	05924920	1
08617963	_member_of_domain_usage	09437454	0
09759311	_derivationally_related_form	02669885	1
10614363	_similar_to	00421535	0
00409211	_derivationally_related_form	02443849	1
13292787	_derivationally_related_form	08253815	0
01775535	_hypernym	01775164	1
00014405	_has_part	00683185	0
10672662	_derivationally_related_form	05186306	1
10183757	_verb_group	01150200	0
05707146	_derivationally_related_form	00614999	1
05959954	_member_of_domain_usage	01647672	0
02519991	_derivationally_related_form	00259643	1
10087736	_member_of_domain_usage	10413276	0
01845627	_member_meronym	01855672	1
02566227	_verb_group	02919100	0
01390616	_derivationally_related_form	00113113	1
05695806	_synset_domain_topic_of	03216828	0
14299070	_derivationally_related_form	00091124	1
00350461	_has_part	02984061	0
01955508	_derivationally_related_form	00121645	1
13757724	_instance_hypernym	01015104	0
01389329	_derivationally_related_form	00616083	1
07450343	_instance_hypernym	02964389	0
00596393	_derivationally_related_form	10464542	1
00274283	_verb_group	02463704	0
00601822	_derivationally_related_form	00180770	1
04782116	_verb_group	02064131	0
02530861	_also_see	00853776	1
00366547	_member_of_domain_usage	02331175	0
00560893	_derivationally_related_form	00358931	1
03891051	_member_meronym	02911158	0
01856748	_hypernym	01507175	1
10676018	_member_of_domain_usage	02521816	0
08877208	_instance_hypernym	08633957	1
02022359	_member_meronym	00810729	0
06682794	_derivationally_related_form	01955127	1
13650045	_hypernym	07944050	0
13855627	_derivationally_related_form	00661213	1
00874977	_synset_domain_topic_of	04005630	0
00838367	_derivationally_related_form	01179865	1
07711471	_derivationally_related_form	00964343	0
03150232	_derivationally_related_form	01522276	1
14299336	_derivationally_related_form	10712573	0
01073822	_derivationally_related_form	04993413	1
13766896	_also_see	03078287	0
01944692	_derivationally_related_form	02858304	1
13292787	_synset_domain_topic_of	00772813	0
00350889	_hypernym	00350461	1
01475831	_has_part	08524735	0
02478059	_derivationally_related_form	14455700	1
09218641	_member_of_domain_usage	02332999	0
07238102	_derivationally_related_form	02677332	1
13766896	_member_meronym	00651630	0
09424489	_derivationally_related_form	01816431	1
07432973	_verb_group	10320863	0
02887209	_hypernym	04336034	1
06518253	_also_see	06780882	0
13580723	_derivationally_related_form	01193721	1
06263369	_also_see	10021892	0
10093658	_derivationally_related_form	01140794	1
01848648	_member_meronym	02237631	0
00330160	_derivationally_related_form	00438178	1
00470084	_synset_domain_topic_of	00470084	0
13552270	_derivationally_related_form	00239614	1
13377268	_member_of_domain_usage	02237631	0
01224744	_verb_group	00597385	1
09218641	_hypernym	09274500	0
05219724	_has_part	05514905	1
02958126	_synset_domain_topic_of	02126022	0
01354006	_derivationally_related_form	14705718	1
08153874	_member_meronym	10183757	0
01234345	_derivationally_related_form	00421535	1
01041762	_also_see	02632567	0
04576211	_has_part	04574999	1
05259240	_synset_domain_topic_of	00589769	0
02270165	_derivationally_related_form	10330189	1
07531255	_similar_to	02964389	0
00044673	_derivationally_related_form	00417001	1
10614363	_hypernym	13617952	0
02250625	_derivationally_related_form	13282550	1
00325785	_verb_group	00450866	0
00891216	_derivationally_related_form	13344804	1
10676018	_hypernym	13594585	0
00182213	_derivationally_related_form	02461314	1
13617952	_instance_hypernym	01966861	0
14622893	_has_part	14619225	1
04020617	_also_see	15163797	0
05238282	_has_part	05244934	1
00815173	_derivationally_related_form	07204401	0
05174653	_derivationally_related_form	02519991	1
02384940	_member_meronym	01065441	0
13282550	_derivationally_related_form	02519991	1
03130073	_hypernym	07288639	0
03933529	_derivationally_related_form	02085742	1
01985029	_member_meronym	10717921	0
00366547	_derivationally_related_form	00357680	1
03624966	_instance_hypernym	10535706	0
02519991	_derivationally_related_form	13290676	1
06685456	_has_part	00419950	0
01493897	_derivationally_related_form	14425974	1
10712573	_also_see	01510827	0
04828255	_derivationally_related_form	01782519	1
02022359	_derivationally_related_form	02092309	0
08277805	_hypernym	08276720	1
02254258	_verb_group	02092309	0
01406356	_verb_group	01406512	1
13292787	_derivationally_related_form	01134522	0
01487311	_hypernym	01488956	1
00761713	_verb_group	10285135	0
04980656	_derivationally_related_form	01053144	1
10261388	_derivationally_related_form	00470084	0
15129927	_hypernym	05816790	1
14738752	_hypernym	00014405	0
01537409	_derivationally_related_form	05244934	1
06669384	_hypernym	13985818	0
02531422	_also_see	00856860	1
06201136	_also_see	01765392	0
05003090	_derivationally_related_form	01882170	1
01716227	_member_meronym	10535706	0
02125641	_derivationally_related_form	05714466	1
00350461	_member_meronym	01983771	0
00113113	_derivationally_related_form	01754105	1
00470084	_synset_domain_topic_of	13341756	0
00695523	_also_see	01475282	1
14622893	_verb_group	02094755	0
00658052	_derivationally_related_form	01009871	1
06877578	_member_of_domain_usage	00858377	0
06561942	_derivationally_related_form	00844298	1
00772813	_instance_hypernym	04381994	0
02235666	_verb_group	02537407	1
05959954	_also_see	03130073	0
13874073	_derivationally_related_form	00417001	1
14374432	_derivationally_related_form	00070965	0
14971519	_derivationally_related_form	00238867	1
04792127	_also_see	01065441	0
02291708	_synset_domain_topic_of	13333237	1
13384877	_synset_domain_topic_of	03393017	0
01150467	_hypernym	01150200	1
13421832	_verb_group	05074374	0
13282550	_derivationally_related_form	02253456	1
03764822	_derivationally_related_form	02463704	0
13720096	_hypernym	13716084	1
05382729	_has_part	00810729	0
01167780	_derivationally_related_form	03200357	1
07752264	_verb_group	03617594	0
01475282	_also_see	02451951	1
02326198	_verb_group	08280124	0
10330189	_derivationally_related_form	02269894	1
01015104	_member_of_domain_usage	08524735	0
08612049	_has_part	08495617	1
14299637	_similar_to	01406684	0
00105778	_derivationally_related_form	09930876	1
00143204	_derivationally_related_form	07622261	0
10478960	_derivationally_related_form	02163301	1
01112364	_similar_to	00252710	0
00842989	_derivationally_related_form	09762385	1
00450866	_has_part	00597957	0
01097031	_derivationally_related_form	08397255	1
01855476	_verb_group	06715786	0
00657728	_derivationally_related_form	00874977	1
02112891	_also_see	02958126	0
02196690	_derivationally_related_form	14599641	1
00351406	_verb_group	01015104	0
01684337	_derivationally_related_form	00937656	1
08617963	_instance_hypernym	02677332	0
00980908	_derivationally_related_form	06790042	1
00958823	_member_of_domain_usage	00492677	0
00658052	_derivationally_related_form	06483454	1
01067512	_synset_domain_topic_of	01177703	0
05659365	_hypernym	05659621	1
02254258	_similar_to	03479397	0
01074650	_derivationally_related_form	10112591	1
06518253	_member_of_domain_usage	09810364	0
02072501	_derivationally_related_form	13649791	1
13617952	_member_of_domain_usage	00421535	0
01227137	_also_see	01370590	1
01531265	_verb_group	07722485	0
00800930	_hypernym	00685683	1
10183757	_instance_hypernym	01906823	0
02250625	_derivationally_related_form	00259894	1
01073822	_similar_to	01848976	0
13573666	_hypernym	13575433	1
02261642	_hypernym	10702615	0
07551052	_derivationally_related_form	00859604	1
02326198	_similar_to	02174461	0
05527216	_has_part	05525628	1
03393017	_synset_domain_topic_of	10717921	0
00590148	_derivationally_related_form	09906986	1
00953923	_member_of_domain_usage	10676018	0
09334396	_derivationally_related_form	01292727	1
00015303	_synset_domain_topic_of	07450343	0
00859604	_derivationally_related_form	01073241	1
01256157	_hypernym	04863074	0
00843468	_derivationally_related_form	06730780	1
10305802	_member_meronym	13398241	0
09203827	_member_meronym	09316454	1
01150200	_verb_group	01945381	0
00239614	_verb_group	00238867	1
05525628	_instance_hypernym	02028722	0
01958615	_synset_domain_topic_of	00450335	1
09942871	_also_see	01065441	0
02700104	_derivationally_related_form	00552841	1
06960298	_derivationally_related_form	01524871	0
01960911	_derivationally_related_form	00442115	1
01524871	_hypernym	07883860	0
04236001	_hypernym	03895866	1
08657249	_has_part	06904171	0
06685456	_derivationally_related_form	00890100	1
02669885	_similar_to	00209546	0
00365188	_verb_group	00365647	1
10160412	_instance_hypernym	01527271	0
07450343	_hypernym	07447641	1
04520480	_also_see	00143204	0
08871007	_has_part	08877208	1
08346655	_verb_group	14429608	0
00622584	_derivationally_related_form	01143838	1
09307300	_member_of_domain_usage	15200661	0
06767777	_derivationally_related_form	01058880	1
06780882	_also_see	11450566	0
01820302	_derivationally_related_form	07491981	1
14989820	_derivationally_related_form	01850192	0
10293332	_derivationally_related_form	01924505	1
07711471	_member_meronym	03519981	0
09759311	_derivationally_related_form	08280124	1
04730580	_synset_domain_topic_of	02017937	0
02080577	_derivationally_related_form	02671880	1
04381994	_also_see	07711471	0
00622266	_derivationally_related_form	01574292	1
07123288	_derivationally_related_form	01222645	0
04493505	_derivationally_related_form	02079525	1
06715786	_hypernym	13319726	0
03216828	_derivationally_related_form	01305731	1
03900509	_derivationally_related_form	00252710	0
00657550	_derivationally_related_form	05737153	1
02387910	_verb_group	01647672	0
13969243	_derivationally_related_form	02700104	1
00272448	_derivationally_related_form	10614363	0
09612291	_derivationally_related_form	00869596	1
02261642	_similar_to	01945381	0
01526956	_derivationally_related_form	03872495	1
02639606	_member_of_domain_usage	07944050	0
02672540	_derivationally_related_form	00259643	1
07531255	_member_meronym	09307300	0
02058794	_also_see	02523275	1
02384940	_member_meronym	13341756	0
05524615	_hypernym	05525252	1
00964343	_instance_hypernym	05959954	0
05014099	_derivationally_related_form	00328128	1
03469493	_instance_hypernym	00537682	0
02191766	_derivationally_related_form	05715864	1
00351406	_instance_hypernym	10614363	0
00812274	_derivationally_related_form	01216004	1
14426449	_derivationally_related_form	15119536	0
10298912	_derivationally_related_form	00595146	1
05198036	_similar_to	05525628	0
01216522	_derivationally_related_form	00812526	1
02017937	_similar_to	06478582	0
00299580	_derivationally_related_form	05755486	1
07204911	_hypernym	09626238	0
00085678	_derivationally_related_form	02274482	1
01064758	_also_see	10782791	0
01547641	_verb_group	01547390	1
02919100	_member_of_domain_usage	13720096	0
15183428	_hypernym	15157225	1
13325010	_member_of_domain_usage	15160866	0
06200010	_derivationally_related_form	00350461	1
06271778	_member_meronym	02754103	0
01027263	_derivationally_related_form	04659090	1
03141065	_similar_to	01054227	0
02085742	_derivationally_related_form	10655169	1
00550016	_member_meronym	09612131	0
01158690	_derivationally_related_form	00467717	1
01177703	_instance_hypernym	03210683	0
00851933	_derivationally_related_form	01224517	1
05513807	_instance_hypernym	07883860	0
00259643	_derivationally_related_form	02519991	1
13398241	_instance_hypernym	07442068	0
09826204	_derivationally_related_form	01941093	1
04713692	_hypernym	10209731	0
13876371	_derivationally_related_form	02738544	1
00252710	_member_meronym	00143204	0
02120458	_derivationally_related_form	00513401	1
01093587	_instance_hypernym	04730580	0
01524298	_hypernym	01524871	1
08153874	_member_of_domain_usage	13594585	0
02653996	_derivationally_related_form	02945161	1
05706629	_also_see	11450566	0
10058411	_derivationally_related_form	01820302	1
10413276	_verb_group	00356790	0
02834778	_has_part	04289690	1
10676018	_hypernym	00889472	0
02446164	_derivationally_related_form	00583461	1
00609506	_has_part	13594585	0
00015303	_derivationally_related_form	00858849	1
08276342	_member_of_domain_usage	00421535	0
00842989	_derivationally_related_form	07234230	1
08402828	_verb_group	08402828	0
00320486	_derivationally_related_form	02001858	1
00550016	_derivationally_related_form	02003601	0
00963241	_hypernym	00962129	1
01112364	_hypernym	00272448	0
00356790	_derivationally_related_form	01387786	1
13757724	_verb_group	13325010	0
14585519	_derivationally_related_form	00330144	1
13325010	_verb_group	01475831	0
01354405	_derivationally_related_form	04049405	1
02237631	_verb_group	01524871	0
15145586	_has_part	15146545	1
02599004	_similar_to	01531265	0
02163301	_derivationally_related_form	01135529	1
00810729	_has_part	03891051	0
04854389	_hypernym	04827652	1
06698252	_synset_domain_topic_of	06882561	0
01385920	_derivationally_related_form	09307300	1
00854150	_member_of_domain_usage	02028722	0
00937656	_derivationally_related_form	01551871	1
02331175	_member_of_domain_usage	00419950	0
02326695	_also_see	02451951	1
10305802	_verb_group	00015303	0
13279262	_hypernym	13281275	1
02028722	_member_of_domain_usage	01072072	0
01179865	_derivationally_related_form	07800091	1
02950482	_also_see	05011790	0
13875970	_derivationally_related_form	00143204	1
01856225	_hypernym	02520509	0
01940403	_derivationally_related_form	00302394	1
01848976	_synset_domain_topic_of	01054227	0
00061290	_derivationally_related_form	01955127	1
02551602	_verb_group	04020617	0
01951276	_derivationally_related_form	13326198	1
00953923	_derivationally_related_form	02210119	0
00467717	_derivationally_related_form	13617952	1
02363128	_instance_hypernym	03694761	0
02632567	_hypernym	02632353	1
10140783	_also_see	13421832	0
00963283	_derivationally_related_form	00963241	1
08555333	_hypernym	01035199	0
01432601	_derivationally_related_form	10395073	1
07182485	_member_of_domain_usage	06669384	0
01193099	_hypernym	01166351	1
01646528	_member_of_domain_usage	10261388	0
01961691	_synset_domain_topic_of	00441824	1
06715786	_similar_to	14374432	0
00443231	_hypernym	00442115	1
06478582	_member_meronym	09759311	0
13649791	_hypernym	13603305	1
00765193	_member_of_domain_usage	13650045	0
05058140	_derivationally_related_form	00438178	1
02254258	_instance_hypernym	02022359	0
01273263	_derivationally_related_form	02784732	1
10637038	_instance_hypernym	10280945	0
01131043	_also_see	02037272	1
14405931	_member_of_domain_usage	13970764	0
00136800	_derivationally_related_form	13446197	1
01531265	_member_of_domain_usage	01510827	0
01510827	_derivationally_related_form	14008806	1
00324231	_synset_domain_topic_of	00964105	0
00683185	_also_see	01880531	1
01547001	_has_part	00140393	0
00073828	_hypernym	00070965	1
03694761	_instance_hypernym	10722965	0
01640850	_also_see	00666058	1
03420559	_derivationally_related_form	02402409	0
00658052	_derivationally_related_form	14429608	1
03467984	_instance_hypernym	00889472	0
04565375	_derivationally_related_form	01087197	1
06946497	_synset_domain_topic_of	06946497	0
02123672	_derivationally_related_form	05713737	1
01222645	_instance_hypernym	02111684	0
04046810	_hypernym	04048568	1
01406684	_instance_hypernym	05245775	0
01958615	_synset_domain_topic_of	00299217	1
02064131	_derivationally_related_form	15200661	0
07480068	_hypernym	00026192	1
02334867	_also_see	00964343	0
03933529	_derivationally_related_form	01305731	1
04081281	_instance_hypernym	07722485	0
08894456	_has_part	08895928	1
00651630	_member_meronym	01135529	0
01193099	_derivationally_related_form	01073655	1
01256157	_derivationally_related_form	06883073	0
02261464	_derivationally_related_form	08069878	1
00014405	_member_meronym	03393017	0
01073655	_hypernym	01073241	1
00143204	_also_see	06669384	0
01535709	_also_see	01640850	1
08504851	_similar_to	13985818	0
00854000	_derivationally_related_form	01226600	1
03393017	_hypernym	01950502	0
03000447	_derivationally_related_form	13575433	1
02463141	_instance_hypernym	02669885	0
10527334	_hypernym	10503452	1
10683126	_derivationally_related_form	02994858	0
01840238	_derivationally_related_form	10096217	1
01950502	_instance_hypernym	07450343	0
00890100	_derivationally_related_form	06685456	1
01064758	_verb_group	01606205	0
13282007	_derivationally_related_form	02249741	1
00274283	_has_part	03764822	0
00014742	_derivationally_related_form	15273626	1
10782791	_similar_to	05259240	0
14798450	_hypernym	15010703	1
01135529	_has_part	08280124	0
00208943	_derivationally_related_form	02405252	1
09957156	_hypernym	10676018	0
02667228	_hypernym	02666882	1
06882561	_also_see	02363128	0
02332999	_derivationally_related_form	07556637	1
10683126	_derivationally_related_form	00683185	0
01100145	_derivationally_related_form	10782791	1
05924920	_hypernym	02402409	0
14493426	_derivationally_related_form	02632567	1
00772813	_synset_domain_topic_of	02551602	0
09361517	_hypernym	09437454	1
13325010	_member_of_domain_usage	05706228	0
01235258	_derivationally_related_form	01153486	1
02210119	_instance_hypernym	03764822	0
00852922	_hypernym	00849080	1
02669885	_member_of_domain_usage	04020617	0
00841628	_derivationally_related_form	01193721	1
02017937	_member_of_domain_usage	01522052	0
01167981	_derivationally_related_form	03200357	1
06946497	_also_see	07450343	0
00619183	_derivationally_related_form	15159819	1
00350461	_member_meronym	15160866	0
01854415	_hypernym	01852861	1
14299336	_also_see	05243879	0
09906848	_hypernym	10474645	1
01117723	_derivationally_related_form	00421535	0
13858045	_hypernym	13857486	1
06960298	_similar_to	01531265	0
01845627	_member_meronym	01854047	1
10676018	_hypernym	00252710	0
00105778	_derivationally_related_form	00513401	1
00252710	_has_part	08168117	0
01510827	_derivationally_related_form	00409211	1
01003729	_hypernym	00274283	0
01100145	_derivationally_related_form	10782940	1
01003729	_hypernym	02334867	0
01639105	_derivationally_related_form	03772269	1
01985029	_verb_group	05706228	0
02384686	_derivationally_related_form	07186148	1
10413276	_verb_group	00143204	0
14436875	_derivationally_related_form	02237631	1
06518253	_verb_group	00351406	0
14429608	_hypernym	14429985	1
01547001	_also_see	02334867	0
01182024	_derivationally_related_form	01197338	1
00609506	_verb_group	00186634	0
00459114	_hypernym	00458754	1
00273963	_member_meronym	02965300	0
05645199	_derivationally_related_form	00609100	1
07512465	_also_see	14374432	0
10768585	_derivationally_related_form	01093172	1
04055030	_hypernym	08346655	0
00609506	_derivationally_related_form	01941093	1
14455700	_member_of_domain_usage	02332999	0
01820302	_derivationally_related_form	10058411	1
04792127	_derivationally_related_form	01945381	0
04135315	_hypernym	03872495	1
00589769	_member_of_domain_usage	00421535	0
00300317	_hypernym	00299580	1
05706629	_verb_group	01015104	0
09622302	_derivationally_related_form	01775535	1
08878016	_instance_hypernym	07432973	0
07238102	_derivationally_related_form	02636921	1
00889472	_synset_domain_topic_of	13459322	0
07183151	_derivationally_related_form	00869126	1
02743112	_member_meronym	00651630	0
02043982	_derivationally_related_form	08612049	1
00815173	_member_meronym	13421832	0
00853633	_derivationally_related_form	06778102	1
01848976	_also_see	07622261	0
14889479	_derivationally_related_form	00239614	1
02387910	_derivationally_related_form	05527216	0
01941093	_derivationally_related_form	10433164	1
00889472	_verb_group	05731568	0
00043480	_derivationally_related_form	05714466	1
02746365	_synset_domain_topic_of	07447641	0
08278324	_hypernym	08276342	1
08153874	_member_of_domain_usage	03624966	0
09861946	_derivationally_related_form	01944692	1
02950482	_hypernym	02174461	0
09747329	_derivationally_related_form	03130073	1
00272448	_verb_group	06518253	0
05658603	_derivationally_related_form	02124748	1
01222645	_hypernym	07711471	0
00724029	_derivationally_related_form	13421462	1
04005630	_derivationally_related_form	00186634	0
01190840	_derivationally_related_form	07891726	1
04713692	_instance_hypernym	02958126	0
02274482	_derivationally_related_form	00085678	1
00140393	_member_of_domain_usage	01135529	0
01020117	_similar_to	01017738	1
03216828	_has_part	05695806	0
02174311	_derivationally_related_form	07380144	1
01256157	_instance_hypernym	00252710	0
02464342	_hypernym	02463704	1
00014405	_hypernym	00015303	0
07460104	_derivationally_related_form	01914947	1
09302616	_has_part	07512465	0
00588473	_derivationally_related_form	09759501	1
02210119	_member_meronym	04081281	0
00135718	_also_see	01880531	1
00858849	_hypernym	02112891	0
02053941	_verb_group	01849746	1
14374432	_member_of_domain_usage	00858377	0
00550016	_derivationally_related_form	10318892	1
00421535	_hypernym	08524735	0
01021579	_derivationally_related_form	00958823	1
01647672	_instance_hypernym	00325785	0
01475282	_also_see	01613463	1
02237631	_member_meronym	04906273	0
00384620	_derivationally_related_form	00261405	1
00293916	_member_of_domain_usage	02064131	0
01203676	_derivationally_related_form	02662979	1
00514658	_synset_domain_topic_of	15163797	0
13529616	_derivationally_related_form	02672859	1
00140393	_instance_hypernym	10160412	0
05046471	_hypernym	05046009	1
07450343	_instance_hypernym	06263369	0
01387786	_derivationally_related_form	01741562	1
07182485	_member_meronym	02669885	0
00366547	_verb_group	00364868	1
06698252	_also_see	08524735	0
00858849	_derivationally_related_form	00016380	1
13757724	_instance_hypernym	02092309	0
00076072	_hypernym	00074790	1
01135529	_derivationally_related_form	08392137	0
03199901	_has_part	03905730	1
07450343	_instance_hypernym	10683126	0
00231567	_derivationally_related_form	02478059	1
07442068	_member_of_domain_usage	05243879	0
15166462	_has_part	15169421	1
02334867	_verb_group	01121855	0
08654360	_hypernym	08491826	1
04463679	_synset_domain_topic_of	02334867	0
13622591	_has_part	13622209	1
14622893	_hypernym	14426449	0
00657550	_derivationally_related_form	00874977	1
02022359	_hypernym	06715786	0
00453935	_derivationally_related_form	01140794	1
02261642	_hypernym	00421535	0
00754731	_derivationally_related_form	10672192	1
02334867	_hypernym	02332999	0
04665813	_derivationally_related_form	02529284	1
01475831	_hypernym	02326695	0
02402409	_derivationally_related_form	00215838	1
13580723	_synset_domain_topic_of	02064131	0
01882170	_derivationally_related_form	04544979	1
03003730	_member_meronym	00273963	0
00302394	_derivationally_related_form	01941093	1
09612131	_instance_hypernym	02017937	0
14619225	_has_part	09272085	1
01093587	_similar_to	00683185	0
02652494	_derivationally_related_form	10269458	1
04020617	_also_see	00514658	0
04046810	_derivationally_related_form	01954559	1
02064131	_member_of_domain_usage	04782116	0
01186208	_hypernym	01194418	1
03078287	_also_see	08382297	0
00759694	_derivationally_related_form	10702781	1
00810729	_verb_group	07696527	0
00660102	_derivationally_related_form	10506762	1
13720096	_instance_hypernym	02919100	0
15122231	_derivationally_related_form	00490968	1
01093587	_instance_hypernym	01167981	0
08571139	_hypernym	08523483	1
01035199	_verb_group	10305802	0
15166462	_has_part	15169248	1
02463704	_member_of_domain_usage	01954559	0
04440749	_hypernym	03533972	1
10676018	_also_see	01063695	0
02519991	_derivationally_related_form	13341756	1
07123288	_hypernym	13292787	0
07847198	_derivationally_related_form	01418037	1
00435688	_instance_hypernym	01406684	0
01242716	_derivationally_related_form	02512922	1
03519981	_member_of_domain_usage	13867276	0
09889941	_hypernym	10744164	1
05091316	_also_see	00889472	0
02252931	_derivationally_related_form	01120448	1
07711471	_has_part	13292787	0
02566227	_derivationally_related_form	10157744	1
13325010	_similar_to	09612131	0
04157320	_derivationally_related_form	01551871	1
03469493	_verb_group	04873550	0
09334396	_derivationally_related_form	02022359	1
00499066	_similar_to	00273963	0
01996735	_derivationally_related_form	08428019	1
03393017	_hypernym	00435688	0
10529965	_derivationally_related_form	01957529	1
03003344	_has_part	05011790	0
10769321	_derivationally_related_form	02493260	1
05259240	_member_of_domain_usage	02326695	0
01940403	_derivationally_related_form	10096217	1
00252710	_verb_group	00858377	0
00555648	_derivationally_related_form	02055649	1
02387910	_similar_to	03694761	0
06508816	_derivationally_related_form	01001643	1
03479397	_synset_domain_topic_of	07696527	0
03309465	_has_part	04082886	1
06882561	_also_see	02599004	0
00239614	_hypernym	00239321	1
04005630	_hypernym	02677332	0
02005756	_derivationally_related_form	04864515	1
14429608	_derivationally_related_form	09810364	0
01782218	_derivationally_related_form	07520612	1
13421832	_has_part	02964389	0
01223182	_derivationally_related_form	13877918	1
02669885	_verb_group	13867276	0
01136614	_derivationally_related_form	03467984	1
13341756	_synset_domain_topic_of	10637038	0
02478059	_derivationally_related_form	00231567	1
00593108	_instance_hypernym	02746365	0
00595146	_derivationally_related_form	10298912	1
08153874	_has_part	06882561	0
00980908	_derivationally_related_form	05960464	1
01647672	_synset_domain_topic_of	00964343	0
00365188	_derivationally_related_form	00365471	1
00596393	_member_of_domain_usage	03467984	0
07543288	_derivationally_related_form	01775164	1
07123288	_synset_domain_topic_of	14585519	0
06778102	_derivationally_related_form	00105554	1
01134522	_has_part	00252710	0
00891216	_derivationally_related_form	10209731	1
02911158	_hypernym	01015104	0
10760340	_derivationally_related_form	02461314	1
01646528	_verb_group	10782791	0
13358549	_hypernym	13384557	1
02754103	_similar_to	00492677	0
00074790	_hypernym	00070965	1
00609506	_hypernym	03420559	0
00452293	_derivationally_related_form	02003601	1
07622261	_also_see	00964343	0
02994858	_derivationally_related_form	00329831	1
10601526	_derivationally_related_form	00358931	0
15165490	_hypernym	15228378	1
01134522	_instance_hypernym	07288639	0
02210119	_verb_group	02236124	1
08504851	_also_see	01684337	0
00643197	_derivationally_related_form	09790278	1
08873269	_instance_hypernym	01093587	0
02529284	_derivationally_related_form	00066397	1
13325010	_also_see	06877578	0
00264875	_derivationally_related_form	13426238	1
03451473	_hypernym	02331175	0
00754731	_derivationally_related_form	06513366	1
08167779	_synset_domain_topic_of	03764822	0
01219706	_derivationally_related_form	02886599	1
03764822	_member_meronym	13969700	0
08587828	_hypernym	08491826	1
06960298	_instance_hypernym	01985029	0
01765392	_derivationally_related_form	00759551	1
03891051	_hypernym	06877578	0
02046755	_derivationally_related_form	07440979	1
03216828	_instance_hypernym	07622261	0
06201136	_derivationally_related_form	10402086	1
07313004	_has_part	04520480	0
00882961	_derivationally_related_form	02123672	1
01021579	_derivationally_related_form	14622893	0
04660080	_hypernym	05207130	1
06715786	_instance_hypernym	08346655	0
04879658	_derivationally_related_form	00963283	1
00186634	_also_see	15228162	0
10051975	_derivationally_related_form	00416135	1
08549733	_hypernym	00858377	0
02079525	_derivationally_related_form	05246511	1
06877578	_derivationally_related_form	00433458	0
01510827	_derivationally_related_form	07338114	1
05527216	_member_meronym	02599004	0
14889479	_hypernym	14865800	1
13985818	_has_part	07712382	0
10084635	_derivationally_related_form	00800421	1
10712573	_member_meronym	02566227	0
09790278	_hypernym	10488016	1
15163797	_member_meronym	02551602	0
07246742	_derivationally_related_form	00807461	1
01527271	_instance_hypernym	01150200	0
00087152	_also_see	01922763	1
02028722	_similar_to	03469493	0
07204911	_derivationally_related_form	02473431	1
04713692	_synset_domain_topic_of	01041762	0
10299250	_derivationally_related_form	02592397	1
02521816	_member_meronym	00597957	0
07677593	_hypernym	07675627	1
02911158	_verb_group	04055030	0
05714161	_hypernym	05713737	1
14008806	_member_of_domain_usage	02001461	0
10433737	_derivationally_related_form	01180975	1
00274283	_has_part	00274283	0
00849080	_derivationally_related_form	10561320	1
03519981	_instance_hypernym	00252710	0
00302394	_derivationally_related_form	01940403	1
06510977	_instance_hypernym	04055030	0
02344243	_hypernym	02344060	1
01112364	_similar_to	01475831	0
00258854	_derivationally_related_form	00199659	1
00596393	_synset_domain_topic_of	09218641	0
01960911	_derivationally_related_form	10683126	1
14429608	_synset_domain_topic_of	01983771	0
01912893	_derivationally_related_form	04544979	1
06904171	_member_of_domain_usage	13384877	0
02368336	_also_see	02395115	1
07182485	_derivationally_related_form	10722965	0
02037272	_also_see	01549291	1
01216004	_instance_hypernym	02999410	0
02738031	_hypernym	04566257	1
00293916	_instance_hypernym	08549733	0
07186148	_derivationally_related_form	01470225	1
03467984	_instance_hypernym	02334867	0
00031820	_also_see	00802136	1
05525628	_has_part	08382297	0
02395115	_also_see	01073822	1
13377268	_instance_hypernym	04730580	0
02583139	_derivationally_related_form	00962129	1
00186634	_synset_domain_topic_of	01850192	0
04465933	_hypernym	03605722	1
04005630	_member_meronym	02092309	0
02523275	_derivationally_related_form	05042871	1
01063695	_hypernym	01021579	0
02657219	_derivationally_related_form	04713428	1
03479397	_hypernym	01606205	0
00070965	_derivationally_related_form	00842538	1
01781983	_also_see	10140783	0
09759311	_derivationally_related_form	08279298	1
04606574	_similar_to	14585519	0
01522052	_derivationally_related_form	00345641	1
10261388	_member_meronym	03891051	0
14425974	_derivationally_related_form	01489722	1
10280945	_hypernym	00761713	0
15159819	_derivationally_related_form	00619183	1
01135529	_member_of_domain_usage	01135529	0
01570562	_hypernym	01387786	1
00450866	_also_see	13292787	0
00616857	_derivationally_related_form	10351625	1
07531255	_verb_group	05289601	0
00739270	_derivationally_related_form	00311663	1
01542252	_instance_hypernym	00964343	0
02274482	_derivationally_related_form	09810364	1
01542252	_similar_to	03617594	0
02418205	_derivationally_related_form	05769471	1
01106272	_member_of_domain_usage	00651630	0
15170786	_has_part	15171008	1
06518253	_instance_hypernym	07531255	0
01857632	_derivationally_related_form	01053339	1
10712573	_similar_to	01985029	0
09366017	_hypernym	09287968	1
05198036	_instance_hypernym	06263369	0
04842515	_derivationally_related_form	01587077	1
07577772	_member_of_domain_usage	06263369	0
02462580	_verb_group	02461314	1
00651630	_has_part	02632567	0
02389220	_derivationally_related_form	13939353	1
00858849	_verb_group	03150232	0
02022486	_derivationally_related_form	09334396	1
02551602	_member_of_domain_usage	01135529	0
04713428	_derivationally_related_form	02657219	1
05695806	_has_part	08402828	0
00511212	_hypernym	00510189	1
10683126	_member_of_domain_usage	00984609	0
09879744	_derivationally_related_form	02566227	1
04782116	_instance_hypernym	06518253	0
00321486	_derivationally_related_form	03873064	1
10087736	_member_meronym	00143204	0
00259894	_derivationally_related_form	02250625	1
08167779	_instance_hypernym	00499066	0
02924116	_derivationally_related_form	01949110	1
09810364	_derivationally_related_form	07847453	0
10002760	_derivationally_related_form	02521410	1
06904171	_verb_group	01106272	0
00135718	_derivationally_related_form	04721650	1
02334867	_similar_to	08168117	0
02055649	_derivationally_related_form	00330160	1
02334867	_similar_to	00325785	0
01522276	_derivationally_related_form	10781984	1
14008806	_synset_domain_topic_of	00683185	0
00922867	_derivationally_related_form	01004582	1
09302616	_has_part	02876088	0
02667900	_hypernym	02657219	1
08549733	_member_meronym	00350461	0
08895771	_instance_hypernym	08524735	1
08878016	_has_part	00274283	0
15137047	_hypernym	15163005	1
15160866	_also_see	00499066	0
02700104	_verb_group	02657219	1
01354405	_verb_group	02994858	0
03624966	_derivationally_related_form	01671039	1
08617963	_synset_domain_topic_of	08280124	0
02402409	_hypernym	02405252	1
05074374	_also_see	10676018	0
