# Supplementary material
Source: ML conference proceedings conference paper supplement (https://proceedings.neurips.cc/paper_files/paper/2021/hash/0fd600c953cde8121262e322ef09f70e-Abstract.html)
Supplement: Supplementary file 1 [file 0fd600c953cde8121262e322ef09f70e-Supplemental.zip › Supplementary_Material_Paper_8745/data/GraIL-BM_WN18RR_v2/test/test-random-sample/test5.txt]

08858942	_has_part	08890097	1
10562968	_similar_to	02387910	0
01725712	_derivationally_related_form	07480896	1
02632353	_hypernym	07204401	0
02542280	_derivationally_related_form	01203676	1
02706816	_also_see	00810557	0
10515194	_derivationally_related_form	05945508	1
13867276	_similar_to	15163797	0
01958615	_derivationally_related_form	00299217	1
01849746	_verb_group	04460947	0
01398212	_hypernym	14989820	1
10334567	_instance_hypernym	03096960	0
02112891	_hypernym	02112029	1
10676018	_member_meronym	07775375	0
04695963	_derivationally_related_form	01537409	1
02092309	_hypernym	01855476	0
02491383	_derivationally_related_form	10526096	1
07204401	_derivationally_related_form	07123288	0
10489944	_hypernym	10707233	1
14429608	_similar_to	13617952	0
01856225	_member_meronym	01856553	1
07847453	_member_of_domain_usage	03900509	0
05748786	_derivationally_related_form	02666882	1
02210119	_instance_hypernym	07775375	0
00812526	_derivationally_related_form	01572978	1
07071942	_similar_to	01120448	0
01949110	_hypernym	01955984	1
03900509	_derivationally_related_form	02911158	0
02064131	_derivationally_related_form	13774404	1
13757724	_also_see	02254258	0
09334396	_derivationally_related_form	01502762	1
00433458	_member_meronym	06698252	0
09688008	_derivationally_related_form	02957823	1
00761713	_derivationally_related_form	02092309	0
05715864	_derivationally_related_form	02194495	1
02657219	_has_part	03624966	0
04926427	_hypernym	04924103	1
00252710	_derivationally_related_form	02363128	0
14798450	_derivationally_related_form	02627221	1
00239321	_has_part	05816790	0
01098869	_derivationally_related_form	01156438	1
01063695	_also_see	14622893	0
01926984	_verb_group	02099829	1
02677718	_member_meronym	00984609	0
02964389	_derivationally_related_form	01612084	1
01432601	_has_part	01035199	0
07635155	_hypernym	07628870	1
09307300	_hypernym	01966861	0
13291189	_derivationally_related_form	02543874	1
13969700	_instance_hypernym	01606205	0
00753428	_hypernym	00752493	1
00815173	_synset_domain_topic_of	15119536	0
01144657	_derivationally_related_form	00452293	1
03216828	_member_of_domain_usage	04081281	0
01131043	_also_see	01125429	1
07847453	_hypernym	02087156	0
01073241	_derivationally_related_form	01182293	1
06596179	_has_part	05706228	0
01074650	_also_see	02530861	1
00070965	_similar_to	00470084	0
10488016	_hypernym	10632576	1
10160412	_also_see	00366547	0
02632567	_derivationally_related_form	14493426	1
08036849	_member_meronym	02331919	0
08277805	_derivationally_related_form	09759311	1
10280130	_has_part	01580928	0
05050379	_hypernym	05050115	1
00651630	_derivationally_related_form	00962634	0
00470084	_derivationally_related_form	00233386	1
02911158	_member_meronym	04641153	0
02666943	_derivationally_related_form	01322854	1
00984609	_similar_to	02028722	0
08873622	_has_part	08597023	1
00984609	_verb_group	10305802	0
01781983	_derivationally_related_form	14405931	1
00443231	_has_part	13875970	0
00299217	_derivationally_related_form	01958615	1
05046009	_verb_group	10768585	0
06220616	_hypernym	06212839	1
05245775	_member_of_domain_usage	06263369	0
01904293	_derivationally_related_form	09281777	1
13384877	_also_see	01177703	0
00481739	_derivationally_related_form	06667317	1
03096960	_derivationally_related_form	08036849	0
01182293	_derivationally_related_form	04638585	1
15228162	_member_of_domain_usage	03467984	0
02046755	_derivationally_related_form	13878112	1
07944050	_hypernym	14405931	0
07813107	_derivationally_related_form	00213353	1
09262690	_member_of_domain_usage	05005250	0
00467717	_derivationally_related_form	05924920	1
14426449	_has_part	10140783	0
09759311	_derivationally_related_form	02669885	1
02188699	_also_see	03519578	0
00409211	_derivationally_related_form	02443849	1
02087156	_member_meronym	03764822	0
01775535	_hypernym	01775164	1
04020617	_hypernym	03617594	0
10672662	_derivationally_related_form	05186306	1
07569423	_verb_group	04339291	0
05707146	_derivationally_related_form	00614999	1
02911158	_verb_group	02725067	0
02519991	_derivationally_related_form	00259643	1
09437454	_similar_to	03003344	0
01845627	_member_meronym	01855672	1
03694761	_instance_hypernym	10722965	0
01390616	_derivationally_related_form	00113113	1
01765392	_has_part	08555333	0
14299070	_derivationally_related_form	00091124	1
13766896	_instance_hypernym	00435688	0
01955508	_derivationally_related_form	00121645	1
02188699	_derivationally_related_form	01574292	0
01389329	_derivationally_related_form	00616083	1
00350461	_also_see	03479397	0
00596393	_derivationally_related_form	10464542	1
00885925	_has_part	10683126	0
00601822	_derivationally_related_form	00180770	1
02017937	_synset_domain_topic_of	00492677	0
02530861	_also_see	00853776	1
00492677	_instance_hypernym	13384877	0
00560893	_derivationally_related_form	00358931	1
04370048	_member_meronym	00350461	0
01856748	_hypernym	01507175	1
13325010	_similar_to	13580723	0
08877208	_instance_hypernym	08633957	1
02754103	_verb_group	04730580	0
06682794	_derivationally_related_form	01955127	1
04511002	_has_part	10183757	0
13855627	_derivationally_related_form	00661213	1
05005250	_synset_domain_topic_of	07071942	0
00838367	_derivationally_related_form	01179865	1
04339291	_derivationally_related_form	10334567	0
03150232	_derivationally_related_form	01522276	1
01547001	_instance_hypernym	13459322	0
01073822	_derivationally_related_form	04993413	1
07123288	_instance_hypernym	00252710	0
01944692	_derivationally_related_form	02858304	1
10413276	_member_of_domain_usage	01848123	0
00350889	_hypernym	00350461	1
10026553	_member_of_domain_usage	05043973	0
02478059	_derivationally_related_form	14455700	1
03764822	_has_part	02332999	0
07238102	_derivationally_related_form	02677332	1
03125870	_member_of_domain_usage	08626522	0
09424489	_derivationally_related_form	01816431	1
10548227	_instance_hypernym	01957529	0
02887209	_hypernym	04336034	1
13298935	_similar_to	13358549	0
13580723	_derivationally_related_form	01193721	1
01150200	_has_part	01906823	0
10093658	_derivationally_related_form	01140794	1
07204401	_hypernym	10140783	0
00330160	_derivationally_related_form	00438178	1
10209731	_member_of_domain_usage	00609506	0
13552270	_derivationally_related_form	00239614	1
01041762	_has_part	07531255	0
01224744	_verb_group	00597385	1
00026192	_member_meronym	08879197	0
05219724	_has_part	05514905	1
05331404	_member_of_domain_usage	10320863	0
01354006	_derivationally_related_form	14705718	1
05706629	_member_of_domain_usage	08549733	0
01234345	_derivationally_related_form	00421535	1
05043973	_similar_to	00443231	0
04576211	_has_part	04574999	1
13720096	_verb_group	02003601	0
02270165	_derivationally_related_form	10330189	1
02551602	_member_meronym	05003090	0
00044673	_derivationally_related_form	00417001	1
02784732	_has_part	00958823	0
02250625	_derivationally_related_form	13282550	1
07775375	_hypernym	00964343	0
00891216	_derivationally_related_form	13344804	1
10562968	_hypernym	02387910	0
00182213	_derivationally_related_form	02461314	1
00026192	_instance_hypernym	00213353	0
14622893	_has_part	14619225	1
07775375	_instance_hypernym	02387910	0
05238282	_has_part	05244934	1
01035199	_instance_hypernym	05257737	0
05174653	_derivationally_related_form	02519991	1
14989820	_instance_hypernym	02950482	0
13282550	_derivationally_related_form	02519991	1
01135529	_similar_to	02677332	0
03933529	_derivationally_related_form	02085742	1
01510827	_similar_to	01072072	0
00366547	_derivationally_related_form	00357680	1
10334567	_derivationally_related_form	10515194	0
02519991	_derivationally_related_form	13290676	1
01072072	_also_see	05706228	0
01493897	_derivationally_related_form	14425974	1
14738752	_also_see	07450343	0
04828255	_derivationally_related_form	01782519	1
04993413	_derivationally_related_form	00880227	0
08277805	_hypernym	08276720	1
00453935	_has_part	02017937	0
01406356	_verb_group	01406512	1
00418615	_member_of_domain_usage	01064148	0
01487311	_hypernym	01488956	1
04055030	_verb_group	02064131	0
04980656	_derivationally_related_form	01053144	1
10388440	_member_meronym	04460947	0
15129927	_hypernym	05816790	1
07512465	_similar_to	00511041	0
01537409	_derivationally_related_form	05244934	1
05043973	_synset_domain_topic_of	00014405	0
02531422	_also_see	00856860	1
01489989	_member_meronym	05681117	0
05003090	_derivationally_related_form	01882170	1
00026192	_has_part	02334867	0
02125641	_derivationally_related_form	05714466	1
09307300	_synset_domain_topic_of	11450566	0
00113113	_derivationally_related_form	01754105	1
00213353	_synset_domain_topic_of	03502509	0
00695523	_also_see	01475282	1
01957529	_hypernym	10024119	0
00658052	_derivationally_related_form	01009871	1
13594585	_hypernym	09274500	0
06561942	_derivationally_related_form	00844298	1
06780882	_synset_domain_topic_of	00293916	0
02235666	_verb_group	02537407	1
05289601	_similar_to	01064758	0
13874073	_derivationally_related_form	00417001	1
06882561	_instance_hypernym	01134522	0
14971519	_derivationally_related_form	00238867	1
10024119	_verb_group	13290676	0
02291708	_synset_domain_topic_of	13333237	1
15160866	_hypernym	06518253	0
01150467	_hypernym	01150200	1
00511041	_synset_domain_topic_of	02523275	0
13282550	_derivationally_related_form	02253456	1
07569423	_also_see	05615147	0
13720096	_hypernym	13716084	1
00593108	_has_part	05003090	0
01167780	_derivationally_related_form	03200357	1
02984061	_hypernym	00351406	0
01475282	_also_see	02451951	1
10221312	_hypernym	01955984	0
10330189	_derivationally_related_form	02269894	1
09262690	_member_meronym	00609100	0
08612049	_has_part	08495617	1
00953923	_also_see	08878016	0
00105778	_derivationally_related_form	09930876	1
07696527	_also_see	00599835	0
10478960	_derivationally_related_form	02163301	1
07432973	_hypernym	07711471	0
00842989	_derivationally_related_form	09762385	1
02384940	_also_see	00351406	0
01097031	_derivationally_related_form	08397255	1
00858377	_also_see	08346655	0
00657728	_derivationally_related_form	00874977	1
13617952	_instance_hypernym	01983771	0
02196690	_derivationally_related_form	14599641	1
01035199	_has_part	00167934	0
01684337	_derivationally_related_form	00937656	1
09203827	_similar_to	02583139	0
00980908	_derivationally_related_form	06790042	1
00683185	_has_part	00984609	0
00658052	_derivationally_related_form	06483454	1
03519981	_instance_hypernym	00356790	0
05659365	_hypernym	05659621	1
04863074	_derivationally_related_form	03519981	0
01074650	_derivationally_related_form	10112591	1
08879197	_instance_hypernym	10280130	0
02072501	_derivationally_related_form	13649791	1
06478582	_verb_group	04873550	0
01227137	_also_see	01370590	1
02332999	_member_meronym	03624966	0
00800930	_hypernym	00685683	1
06882561	_member_meronym	00433458	0
02250625	_derivationally_related_form	00259894	1
13650045	_also_see	08280124	0
13573666	_hypernym	13575433	1
09612131	_hypernym	06201136	0
07551052	_derivationally_related_form	00859604	1
08168117	_derivationally_related_form	10087736	0
05527216	_has_part	05525628	1
07575510	_similar_to	10024119	0
00590148	_derivationally_related_form	09906986	1
00290579	_also_see	10140783	0
09334396	_derivationally_related_form	01292727	1
08879197	_member_of_domain_usage	02439501	0
00859604	_derivationally_related_form	01073241	1
00421535	_verb_group	13319726	0
00843468	_derivationally_related_form	06730780	1
01855476	_has_part	00620424	0
09203827	_member_meronym	09316454	1
00213353	_has_part	03679986	0
00239614	_verb_group	00238867	1
02331175	_member_of_domain_usage	00596393	0
01958615	_synset_domain_topic_of	00450335	1
15164957	_derivationally_related_form	15164957	0
02700104	_derivationally_related_form	00552841	1
13969700	_synset_domain_topic_of	06780882	0
01960911	_derivationally_related_form	00442115	1
04993413	_instance_hypernym	02893338	0
04236001	_hypernym	03895866	1
01063695	_also_see	08285896	0
06685456	_derivationally_related_form	00890100	1
02017937	_has_part	02027612	0
00365188	_verb_group	00365647	1
00015303	_synset_domain_topic_of	14299336	0
07450343	_hypernym	07447641	1
00514658	_member_meronym	14585519	0
08871007	_has_part	08877208	1
00597957	_member_of_domain_usage	04463679	0
00622584	_derivationally_related_form	01143838	1
08410688	_instance_hypernym	01672607	0
06767777	_derivationally_related_form	01058880	1
01179865	_has_part	10717921	0
01820302	_derivationally_related_form	07491981	1
00724029	_has_part	00595146	0
10293332	_derivationally_related_form	01924505	1
13421832	_also_see	10535706	0
09759311	_derivationally_related_form	08280124	1
01432601	_member_of_domain_usage	05257737	0
02080577	_derivationally_related_form	02671880	1
13421832	_derivationally_related_form	01216004	0
00622266	_derivationally_related_form	01574292	1
02746365	_hypernym	02521816	0
04493505	_derivationally_related_form	02079525	1
01954559	_also_see	06882561	0
03216828	_derivationally_related_form	01305731	1
00593108	_synset_domain_topic_of	07752264	0
00657550	_derivationally_related_form	05737153	1
10026553	_has_part	01064148	0
13969243	_derivationally_related_form	02700104	1
08392137	_derivationally_related_form	01848976	0
09612291	_derivationally_related_form	00869596	1
01179865	_derivationally_related_form	01510827	0
01526956	_derivationally_related_form	03872495	1
13358549	_member_of_domain_usage	03971422	0
02672540	_derivationally_related_form	00259643	1
00853776	_has_part	01064148	0
02058794	_also_see	02523275	1
02893338	_derivationally_related_form	02519991	0
05524615	_hypernym	05525252	1
06268784	_also_see	08311933	0
05014099	_derivationally_related_form	00328128	1
04792127	_synset_domain_topic_of	03891051	0
02191766	_derivationally_related_form	05715864	1
02583139	_similar_to	00810557	0
00812274	_derivationally_related_form	01216004	1
00593108	_derivationally_related_form	02463704	0
10298912	_derivationally_related_form	00595146	1
10285135	_member_meronym	13325010	0
01216522	_derivationally_related_form	00812526	1
01242716	_verb_group	06695227	0
00299580	_derivationally_related_form	05755486	1
06596179	_derivationally_related_form	00014405	0
00085678	_derivationally_related_form	02274482	1
00739270	_similar_to	10768585	0
01547641	_verb_group	01547390	1
02092309	_derivationally_related_form	00858377	0
15183428	_hypernym	15157225	1
03467984	_instance_hypernym	07531255	0
06200010	_derivationally_related_form	00350461	1
01093587	_instance_hypernym	02017937	0
01027263	_derivationally_related_form	04659090	1
15165490	_derivationally_related_form	01856225	0
02085742	_derivationally_related_form	10655169	1
02583139	_has_part	02583139	0
01158690	_derivationally_related_form	00467717	1
07432973	_has_part	08168117	0
00851933	_derivationally_related_form	01224517	1
10388440	_member_meronym	00453935	0
00259643	_derivationally_related_form	02519991	1
10413276	_synset_domain_topic_of	02210119	0
09826204	_derivationally_related_form	01941093	1
08555333	_instance_hypernym	01041762	0
13876371	_derivationally_related_form	02738544	1
03003344	_has_part	03467984	0
02120458	_derivationally_related_form	00513401	1
03101796	_similar_to	10183757	0
01524298	_hypernym	01524871	1
01740892	_synset_domain_topic_of	10160412	0
02653996	_derivationally_related_form	02945161	1
01848976	_also_see	01134522	0
10058411	_derivationally_related_form	01820302	1
02334867	_synset_domain_topic_of	05243704	0
02834778	_has_part	04289690	1
00470084	_member_of_domain_usage	01646528	0
02446164	_derivationally_related_form	00583461	1
02632567	_hypernym	09437454	0
00015303	_derivationally_related_form	00858849	1
01067512	_member_meronym	10601526	0
00842989	_derivationally_related_form	07234230	1
00272448	_member_meronym	01015104	0
00320486	_derivationally_related_form	02001858	1
01522052	_hypernym	00492677	0
00963241	_hypernym	00962129	1
02017937	_verb_group	00418615	0
00356790	_derivationally_related_form	01387786	1
02784732	_instance_hypernym	00014405	0
14585519	_derivationally_related_form	00330144	1
01121855	_member_of_domain_usage	03003344	0
01354405	_derivationally_related_form	04049405	1
10024119	_verb_group	08311933	0
15145586	_has_part	15146545	1
07512465	_has_part	02725067	0
02163301	_derivationally_related_form	01135529	1
05681117	_synset_domain_topic_of	00239321	0
04854389	_hypernym	04827652	1
08878016	_hypernym	13421832	0
01385920	_derivationally_related_form	09307300	1
03248958	_derivationally_related_form	10149527	0
00937656	_derivationally_related_form	01551871	1
03393017	_similar_to	10305802	0
02326695	_also_see	02451951	1
10285135	_member_of_domain_usage	02911158	0
13279262	_hypernym	13281275	1
07752264	_has_part	01216004	0
01179865	_derivationally_related_form	07800091	1
01167981	_synset_domain_topic_of	10712573	0
13875970	_derivationally_related_form	00143204	1
08555333	_member_of_domain_usage	08382297	0
01940403	_derivationally_related_form	00302394	1
00143204	_instance_hypernym	08504851	0
00061290	_derivationally_related_form	01955127	1
08555333	_also_see	03078287	0
01951276	_derivationally_related_form	13326198	1
08873269	_hypernym	09612131	0
00467717	_derivationally_related_form	13617952	1
00143204	_similar_to	04081281	0
02632567	_hypernym	02632353	1
13650045	_verb_group	03519578	0
00963283	_derivationally_related_form	00963241	1
00550016	_has_part	10601526	0
01432601	_derivationally_related_form	10395073	1
00014405	_similar_to	09612131	0
01193099	_hypernym	01166351	1
15235126	_also_see	05046009	0
01961691	_synset_domain_topic_of	00441824	1
05174653	_derivationally_related_form	04993882	0
00443231	_hypernym	00442115	1
07722485	_member_meronym	14585519	0
13649791	_hypernym	13603305	1
02639606	_member_meronym	00765193	0
05058140	_derivationally_related_form	00438178	1
00083975	_also_see	00724029	0
01273263	_derivationally_related_form	02784732	1
03891051	_similar_to	13617952	0
01131043	_also_see	02037272	1
08346655	_member_meronym	00351406	0
00136800	_derivationally_related_form	13446197	1
07722485	_has_part	10320863	0
01510827	_derivationally_related_form	14008806	1
01606205	_also_see	00252710	0
00683185	_also_see	01880531	1
05734381	_member_of_domain_usage	00121645	0
00073828	_hypernym	00070965	1
01928838	_similar_to	03821660	0
01640850	_also_see	00666058	1
04020617	_hypernym	01134522	0
00658052	_derivationally_related_form	14429608	1
10676018	_synset_domain_topic_of	02387910	0
04565375	_derivationally_related_form	01087197	1
00538876	_synset_domain_topic_of	00026192	0
02123672	_derivationally_related_form	05713737	1
02329883	_instance_hypernym	02329883	0
04046810	_hypernym	04048568	1
06882561	_derivationally_related_form	05259240	0
01958615	_synset_domain_topic_of	00299217	1
14429608	_derivationally_related_form	13325010	0
07480068	_hypernym	00026192	1
00854150	_has_part	02677718	0
03933529	_derivationally_related_form	01305731	1
01940403	_hypernym	05816790	0
08894456	_has_part	08895928	1
07531255	_synset_domain_topic_of	13594585	0
01193099	_derivationally_related_form	01073655	1
11450566	_synset_domain_topic_of	13969700	0
02261464	_derivationally_related_form	08069878	1
13766896	_has_part	01406684	0
01073655	_hypernym	01073241	1
09218641	_instance_hypernym	03519578	0
01535709	_also_see	01640850	1
00958823	_also_see	07577772	0
00854000	_derivationally_related_form	01226600	1
10149527	_member_of_domain_usage	03101796	0
03000447	_derivationally_related_form	13575433	1
14299637	_derivationally_related_form	05243879	0
10527334	_hypernym	10503452	1
01073822	_member_of_domain_usage	07123288	0
01840238	_derivationally_related_form	10096217	1
09957156	_also_see	10413276	0
00890100	_derivationally_related_form	06685456	1
00311663	_derivationally_related_form	00616083	0
13282007	_derivationally_related_form	02249741	1
01547001	_hypernym	01856225	0
00014742	_derivationally_related_form	15273626	1
03519578	_member_meronym	14622893	0
14798450	_hypernym	15010703	1
09302616	_verb_group	06877578	0
00208943	_derivationally_related_form	02405252	1
04370048	_member_meronym	00761713	0
02667228	_hypernym	02666882	1
13459322	_instance_hypernym	02112891	0
02332999	_derivationally_related_form	07556637	1
10017422	_also_see	01580928	0
01100145	_derivationally_related_form	10782791	1
07696527	_similar_to	02022359	0
14493426	_derivationally_related_form	02632567	1
13358549	_has_part	02381726	0
09361517	_hypernym	09437454	1
07643026	_also_see	07643026	0
01235258	_derivationally_related_form	01153486	1
07722217	_has_part	01523986	0
00852922	_hypernym	00849080	1
01489722	_also_see	00853776	0
00841628	_derivationally_related_form	01193721	1
04339291	_also_see	04005630	0
01167981	_derivationally_related_form	03200357	1
03003344	_derivationally_related_form	00366547	0
00619183	_derivationally_related_form	15159819	1
02964389	_has_part	03451473	0
01854415	_hypernym	01852861	1
00880227	_hypernym	05681117	0
09906848	_hypernym	10474645	1
06777687	_hypernym	01966706	0
13858045	_hypernym	13857486	1
13875970	_has_part	03880323	0
01845627	_member_meronym	01854047	1
04339291	_member_of_domain_usage	00589309	0
00105778	_derivationally_related_form	00513401	1
10334567	_hypernym	00239321	0
01510827	_derivationally_related_form	00409211	1
00435688	_member_of_domain_usage	00958823	0
01100145	_derivationally_related_form	10782940	1
02999410	_member_meronym	10320863	0
01639105	_derivationally_related_form	03772269	1
06780882	_similar_to	13969700	0
02384686	_derivationally_related_form	07186148	1
10334567	_similar_to	03171356	0
14436875	_derivationally_related_form	02237631	1
02706816	_member_meronym	02706816	0
14429608	_hypernym	14429985	1
00492677	_has_part	02677718	0
01182024	_derivationally_related_form	01197338	1
02706816	_also_see	04081281	0
00459114	_hypernym	00458754	1
03469493	_member_meronym	06263369	0
05645199	_derivationally_related_form	00609100	1
00853776	_instance_hypernym	02017937	0
10768585	_derivationally_related_form	01093172	1
01216004	_derivationally_related_form	01854415	0
00609506	_derivationally_related_form	01941093	1
00015303	_has_part	05245775	0
01820302	_derivationally_related_form	10058411	1
00609506	_member_meronym	01856225	0
04135315	_hypernym	03872495	1
02210119	_instance_hypernym	08504851	0
00300317	_hypernym	00299580	1
02876088	_member_meronym	05706629	0
09622302	_derivationally_related_form	01775535	1
03096960	_derivationally_related_form	10515194	0
07238102	_derivationally_related_form	02636921	1
01177703	_hypernym	02566227	0
07183151	_derivationally_related_form	00869126	1
00953923	_instance_hypernym	00964343	0
02043982	_derivationally_related_form	08612049	1
14585519	_verb_group	04520480	0
00853633	_derivationally_related_form	06778102	1
07531255	_instance_hypernym	02984061	0
14889479	_derivationally_related_form	00239614	1
03479397	_member_meronym	09302616	0
01941093	_derivationally_related_form	10433164	1
02463141	_member_of_domain_usage	00356790	0
00043480	_derivationally_related_form	05714466	1
09886010	_similar_to	00595146	0
08278324	_hypernym	08276342	1
01957529	_synset_domain_topic_of	08033194	0
09861946	_derivationally_related_form	01944692	1
15235126	_verb_group	02523275	0
09747329	_derivationally_related_form	03130073	1
07531255	_has_part	01646528	0
05658603	_derivationally_related_form	02124748	1
10087736	_synset_domain_topic_of	07573103	0
00724029	_derivationally_related_form	13421462	1
08392137	_also_see	02463141	0
01190840	_derivationally_related_form	07891726	1
08549733	_similar_to	13969700	0
02274482	_derivationally_related_form	00085678	1
03479397	_instance_hypernym	00272448	0
01020117	_similar_to	01017738	1
03191776	_synset_domain_topic_of	14889479	0
02174311	_derivationally_related_form	07380144	1
07896994	_derivationally_related_form	03999992	0
02464342	_hypernym	02463704	1
05091316	_synset_domain_topic_of	14622893	0
07460104	_derivationally_related_form	01914947	1
01135529	_derivationally_related_form	10183757	0
00588473	_derivationally_related_form	09759501	1
05243879	_derivationally_related_form	01177703	0
00135718	_also_see	01880531	1
00290579	_member_meronym	02677332	0
02053941	_verb_group	01849746	1
09262690	_verb_group	05681117	0
00550016	_derivationally_related_form	10318892	1
00274283	_member_meronym	02521816	0
01021579	_derivationally_related_form	00958823	1
03065424	_also_see	04792127	0
01475282	_also_see	01613463	1
13580723	_has_part	02984061	0
00384620	_derivationally_related_form	00261405	1
01158596	_hypernym	02261464	0
01203676	_derivationally_related_form	02662979	1
01955984	_member_meronym	00212049	0
13529616	_derivationally_related_form	02672859	1
03156405	_derivationally_related_form	05198036	0
05046471	_hypernym	05046009	1
08549733	_member_of_domain_usage	05382729	0
01387786	_derivationally_related_form	01741562	1
02957823	_member_meronym	07896994	0
00366547	_verb_group	00364868	1
05243879	_has_part	00984609	0
00858849	_derivationally_related_form	00016380	1
00325785	_member_of_domain_usage	01216004	0
00076072	_hypernym	00074790	1
00616083	_member_of_domain_usage	09203827	0
03199901	_has_part	03905730	1
08402828	_similar_to	10676018	0
00231567	_derivationally_related_form	02478059	1
09302616	_has_part	01064758	0
15166462	_has_part	15169421	1
10160412	_hypernym	07531255	0
08654360	_hypernym	08491826	1
07182485	_instance_hypernym	14585519	0
13622591	_has_part	13622209	1
02958126	_verb_group	07204401	0
00657550	_derivationally_related_form	00874977	1
07696527	_member_meronym	03065424	0
00453935	_derivationally_related_form	01140794	1
00351406	_hypernym	08524735	0
00754731	_derivationally_related_form	10672192	1
02599004	_instance_hypernym	03519981	0
04665813	_derivationally_related_form	02529284	1
13319726	_derivationally_related_form	09302616	0
02402409	_derivationally_related_form	00215838	1
00311663	_member_of_domain_usage	02368336	0
01882170	_derivationally_related_form	04544979	1
02384940	_member_meronym	02984061	0
00302394	_derivationally_related_form	01941093	1
02754103	_similar_to	02919100	0
14619225	_has_part	09272085	1
00683185	_hypernym	07442068	0
02652494	_derivationally_related_form	10269458	1
03467984	_has_part	15228162	0
04046810	_derivationally_related_form	01954559	1
05177285	_also_see	04907269	0
01186208	_hypernym	01194418	1
01848648	_member_meronym	03210683	0
00759694	_derivationally_related_form	10702781	1
00973077	_has_part	10017422	0
00660102	_derivationally_related_form	10506762	1
10334567	_member_meronym	01955984	0
15122231	_derivationally_related_form	00490968	1
04005630	_hypernym	13290676	0
08571139	_hypernym	08523483	1
05331404	_also_see	07204401	0
15166462	_has_part	15169248	1
00651630	_also_see	14989820	0
04440749	_hypernym	03533972	1
09302616	_member_of_domain_usage	10285135	0
02519991	_derivationally_related_form	13341756	1
00964105	_synset_domain_topic_of	01855476	0
07847198	_derivationally_related_form	01418037	1
10140783	_has_part	13459322	0
01242716	_derivationally_related_form	02512922	1
00458754	_synset_domain_topic_of	07071942	0
09889941	_hypernym	10744164	1
13325010	_synset_domain_topic_of	05245775	0
02252931	_derivationally_related_form	01120448	1
02784732	_instance_hypernym	10683126	0
02566227	_derivationally_related_form	10157744	1
10280130	_similar_to	05734381	0
04157320	_derivationally_related_form	01551871	1
07442068	_verb_group	00683185	0
09334396	_derivationally_related_form	02022359	1
00419950	_has_part	03764822	0
01996735	_derivationally_related_form	08428019	1
01121855	_synset_domain_topic_of	04713692	0
10529965	_derivationally_related_form	01957529	1
14455700	_verb_group	00651630	0
10769321	_derivationally_related_form	02493260	1
07569423	_member_of_domain_usage	05046009	0
01940403	_derivationally_related_form	10096217	1
01716227	_derivationally_related_form	10140783	0
00555648	_derivationally_related_form	02055649	1
14455700	_instance_hypernym	01121855	0
06508816	_derivationally_related_form	01001643	1
01182293	_member_meronym	06882561	0
03309465	_has_part	04082886	1
03821660	_synset_domain_topic_of	03624966	0
00239614	_hypernym	00239321	1
04520480	_member_of_domain_usage	00593108	0
02005756	_derivationally_related_form	04864515	1
03900509	_has_part	09307300	0
01782218	_derivationally_related_form	07520612	1
00810557	_synset_domain_topic_of	03999992	0
01223182	_derivationally_related_form	13877918	1
01828736	_verb_group	03393017	0
01136614	_derivationally_related_form	03467984	1
01856225	_verb_group	08280124	0
02478059	_derivationally_related_form	00231567	1
04792127	_synset_domain_topic_of	00293916	0
00595146	_derivationally_related_form	10298912	1
03156405	_instance_hypernym	01985029	0
00980908	_derivationally_related_form	05960464	1
07447641	_has_part	07204911	0
00365188	_derivationally_related_form	00365471	1
02368336	_member_of_domain_usage	00616083	0
07543288	_derivationally_related_form	01775164	1
02190166	_verb_group	00810557	0
06778102	_derivationally_related_form	00105554	1
00651630	_verb_group	00651630	0
00891216	_derivationally_related_form	10209731	1
09810364	_synset_domain_topic_of	09302616	0
10760340	_derivationally_related_form	02461314	1
00433458	_member_meronym	04055030	0
13358549	_hypernym	13384557	1
05706228	_instance_hypernym	02028722	0
00074790	_hypernym	00070965	1
03096960	_has_part	00596692	0
00452293	_derivationally_related_form	02003601	1
01849746	_member_of_domain_usage	14889479	0
02994858	_derivationally_related_form	00329831	1
08311933	_member_of_domain_usage	10334567	0
15165490	_hypernym	15228378	1
03624966	_similar_to	09437454	0
02210119	_verb_group	02236124	1
06780882	_verb_group	09810364	0
00643197	_derivationally_related_form	09790278	1
04381994	_synset_domain_topic_of	02463141	0
02529284	_derivationally_related_form	00066397	1
05257737	_verb_group	01177703	0
00264875	_derivationally_related_form	13426238	1
03451473	_member_of_domain_usage	07234230	0
00754731	_derivationally_related_form	06513366	1
03130073	_verb_group	13421832	0
01219706	_derivationally_related_form	02886599	1
04005630	_similar_to	02657219	0
08587828	_hypernym	08491826	1
02964389	_instance_hypernym	10601526	0
01765392	_derivationally_related_form	00759551	1
07722217	_instance_hypernym	01957529	0
02046755	_derivationally_related_form	07440979	1
02190166	_also_see	10515194	0
06201136	_derivationally_related_form	10402086	1
02950482	_member_of_domain_usage	00858849	0
00882961	_derivationally_related_form	02123672	1
00453935	_similar_to	07573103	0
04660080	_hypernym	05207130	1
04339291	_synset_domain_topic_of	05005250	0
04879658	_derivationally_related_form	00963283	1
00683185	_similar_to	00683185	0
10051975	_derivationally_related_form	00416135	1
13969700	_member_meronym	11450566	0
02079525	_derivationally_related_form	05246511	1
09942871	_hypernym	06698252	0
01510827	_derivationally_related_form	07338114	1
08626522	_has_part	10183757	0
14889479	_hypernym	14865800	1
05003090	_member_meronym	08168117	0
10084635	_derivationally_related_form	00800421	1
06268784	_synset_domain_topic_of	03999992	0
09790278	_hypernym	10488016	1
01158596	_hypernym	04520480	0
07246742	_derivationally_related_form	00807461	1
02092309	_verb_group	09810364	0
00087152	_also_see	01922763	1
13377268	_also_see	05198036	0
07204911	_derivationally_related_form	02473431	1
00761713	_similar_to	00293916	0
10299250	_derivationally_related_form	02592397	1
08253815	_also_see	13278375	0
07677593	_hypernym	07675627	1
08280124	_derivationally_related_form	13650045	0
05714161	_hypernym	05713737	1
13278375	_also_see	04863074	0
10433737	_derivationally_related_form	01180975	1
14455700	_instance_hypernym	01740892	0
00849080	_derivationally_related_form	10561320	1
08873269	_also_see	01406684	0
00302394	_derivationally_related_form	01940403	1
02964389	_derivationally_related_form	00657016	0
02344243	_hypernym	02344060	1
13358549	_instance_hypernym	03057021	0
00258854	_derivationally_related_form	00199659	1
00435688	_verb_group	00537682	0
01960911	_derivationally_related_form	10683126	1
02911158	_has_part	07537259	0
01912893	_derivationally_related_form	04544979	1
01828736	_has_part	10305802	0
02368336	_also_see	02395115	1
10183757	_similar_to	13594585	0
02037272	_also_see	01549291	1
00356790	_verb_group	02551602	0
02738031	_hypernym	04566257	1
07204401	_hypernym	02111684	0
07186148	_derivationally_related_form	01470225	1
07204401	_hypernym	04081281	0
00031820	_also_see	00802136	1
01118614	_derivationally_related_form	00443231	0
02395115	_also_see	01073822	1
02439501	_member_of_domain_usage	00984609	0
02583139	_derivationally_related_form	00962129	1
01041762	_derivationally_related_form	13650045	0
04465933	_hypernym	03605722	1
15160866	_verb_group	01064758	0
02523275	_derivationally_related_form	05042871	1
00596692	_instance_hypernym	10087736	0
02657219	_derivationally_related_form	04713428	1
02098458	_similar_to	05040275	0
00070965	_derivationally_related_form	00842538	1
03764822	_member_meronym	13757724	0
09759311	_derivationally_related_form	08279298	1
00418615	_verb_group	01856748	0
01522052	_derivationally_related_form	00345641	1
02632353	_hypernym	13290676	0
14425974	_derivationally_related_form	01489722	1
00083975	_has_part	02725067	0
15159819	_derivationally_related_form	00619183	1
08873269	_has_part	13384877	0
01570562	_hypernym	01387786	1
01855672	_similar_to	14408086	0
00616857	_derivationally_related_form	10351625	1
01966706	_has_part	07884567	0
00739270	_derivationally_related_form	00311663	1
06201136	_member_meronym	14299637	0
02274482	_derivationally_related_form	09810364	1
05816790	_hypernym	03057021	0
02418205	_derivationally_related_form	05769471	1
03880323	_verb_group	04511002	0
15170786	_has_part	15171008	1
07432973	_similar_to	07722485	0
01857632	_derivationally_related_form	01053339	1
10140783	_also_see	02639606	0
09366017	_hypernym	09287968	1
02519991	_synset_domain_topic_of	07071942	0
04842515	_derivationally_related_form	01587077	1
00239321	_member_of_domain_usage	04339291	0
02462580	_verb_group	02461314	1
13292787	_member_meronym	04520480	0
02389220	_derivationally_related_form	13939353	1
13594585	_has_part	02402409	0
02022486	_derivationally_related_form	09334396	1
08276342	_derivationally_related_form	10637038	0
04713428	_derivationally_related_form	02657219	1
08276342	_member_of_domain_usage	00293916	0
00511212	_hypernym	00510189	1
01646528	_similar_to	05289601	0
09879744	_derivationally_related_form	02566227	1
00026192	_also_see	10280130	0
00321486	_derivationally_related_form	03873064	1
07310507	_has_part	06882561	0
00259894	_derivationally_related_form	02250625	1
01121855	_similar_to	01527271	0
02924116	_derivationally_related_form	01949110	1
00609100	_verb_group	09886010	0
10002760	_derivationally_related_form	02521410	1
13325010	_derivationally_related_form	03891051	0
00135718	_derivationally_related_form	04721650	1
01547001	_hypernym	15165490	0
02055649	_derivationally_related_form	00330160	1
02326198	_instance_hypernym	14426449	0
01522276	_derivationally_related_form	10781984	1
00889472	_member_meronym	01523986	0
00922867	_derivationally_related_form	01004582	1
02098458	_member_of_domain_usage	08311933	0
02667900	_hypernym	02657219	1
08168117	_hypernym	02746365	0
08895771	_instance_hypernym	08524735	1
03764822	_synset_domain_topic_of	01135529	0
15137047	_hypernym	15163005	1
01510827	_member_of_domain_usage	10717921	0
02700104	_verb_group	02657219	1
08153874	_member_meronym	15200661	0
03624966	_derivationally_related_form	01671039	1
13766896	_verb_group	01072072	0
02402409	_hypernym	02405252	1
08311933	_also_see	01118614	0
