# Supplementary material
Source: ML conference proceedings conference paper supplement (https://proceedings.neurips.cc/paper_files/paper/2021/hash/0fd600c953cde8121262e322ef09f70e-Abstract.html)
Supplement: Supplementary file 1 [file 0fd600c953cde8121262e322ef09f70e-Supplemental.zip › Supplementary_Material_Paper_8745/data/GraIL-BM_WN18RR_v2/test/test-random-sample/test6.txt]

08858942	_has_part	08890097	1
02669885	_instance_hypernym	00964105	0
01725712	_derivationally_related_form	07480896	1
02632353	_has_part	10535706	0
02542280	_derivationally_related_form	01203676	1
00453935	_member_meronym	01580928	0
10515194	_derivationally_related_form	05945508	1
02950482	_hypernym	02326198	0
01958615	_derivationally_related_form	00299217	1
06699225	_instance_hypernym	04995211	0
01398212	_hypernym	14989820	1
05040275	_derivationally_related_form	03191776	0
02112891	_hypernym	02112029	1
08168117	_derivationally_related_form	03216828	0
04695963	_derivationally_related_form	01537409	1
00739270	_verb_group	01855476	0
02491383	_derivationally_related_form	10526096	1
13421832	_similar_to	02746365	0
10489944	_hypernym	10707233	1
14299336	_instance_hypernym	01765392	0
01856225	_member_meronym	01856553	1
04993413	_has_part	01489989	0
05748786	_derivationally_related_form	02666882	1
03003344	_member_of_domain_usage	09437454	0
00812526	_derivationally_related_form	01572978	1
04390873	_also_see	00366547	0
01949110	_hypernym	01955984	1
00962634	_member_meronym	02237631	0
02064131	_derivationally_related_form	13774404	1
00651630	_instance_hypernym	05525628	0
09334396	_derivationally_related_form	01502762	1
01432601	_member_of_domain_usage	02566227	0
09688008	_derivationally_related_form	02957823	1
00026192	_member_meronym	03679986	0
05715864	_derivationally_related_form	02194495	1
13377268	_similar_to	02677718	0
04926427	_hypernym	04924103	1
05257737	_member_meronym	10712573	0
14798450	_derivationally_related_form	02627221	1
00815173	_has_part	10216106	0
01098869	_derivationally_related_form	01156438	1
01781983	_verb_group	00891850	0
01926984	_verb_group	02099829	1
08878016	_member_meronym	08392137	0
02964389	_derivationally_related_form	01612084	1
02677332	_instance_hypernym	00891850	0
07635155	_hypernym	07628870	1
05245775	_has_part	03393017	0
13291189	_derivationally_related_form	02543874	1
10042300	_member_meronym	03883664	0
00753428	_hypernym	00752493	1
07722217	_similar_to	03171356	0
01144657	_derivationally_related_form	00452293	1
07573103	_verb_group	08879197	0
01131043	_also_see	01125429	1
01041762	_member_meronym	01887020	0
01073241	_derivationally_related_form	01182293	1
10021892	_derivationally_related_form	02754103	0
01074650	_also_see	02530861	1
03156405	_member_of_domain_usage	07442068	0
10488016	_hypernym	10632576	1
04520480	_hypernym	06777687	0
02632567	_derivationally_related_form	14493426	1
09274500	_also_see	02126022	0
08277805	_derivationally_related_form	09759311	1
10160412	_similar_to	10515194	0
05050379	_hypernym	05050115	1
01065441	_instance_hypernym	02965300	0
00470084	_derivationally_related_form	00233386	1
00182213	_hypernym	13292787	0
02666943	_derivationally_related_form	01322854	1
01510827	_similar_to	05257737	0
08873622	_has_part	08597023	1
06695227	_member_of_domain_usage	07537259	0
01781983	_derivationally_related_form	14405931	1
00620424	_similar_to	00537682	0
00299217	_derivationally_related_form	01958615	1
01216004	_hypernym	00597957	0
06220616	_hypernym	06212839	1
01097031	_member_meronym	06669384	0
01904293	_derivationally_related_form	09281777	1
00066397	_similar_to	07889814	0
00481739	_derivationally_related_form	06667317	1
00815801	_similar_to	03777126	0
01182293	_derivationally_related_form	04638585	1
14425974	_member_of_domain_usage	03821660	0
02046755	_derivationally_related_form	13878112	1
01524871	_instance_hypernym	01524871	0
07813107	_derivationally_related_form	00213353	1
04873550	_hypernym	03393017	0
00467717	_derivationally_related_form	05924920	1
10535706	_instance_hypernym	00889472	0
09759311	_derivationally_related_form	02669885	1
10683126	_member_meronym	06946497	0
00409211	_derivationally_related_form	02443849	1
01945381	_also_see	03420559	0
01775535	_hypernym	01775164	1
01106272	_similar_to	00492677	0
10672662	_derivationally_related_form	05186306	1
00550016	_instance_hypernym	03469493	0
05707146	_derivationally_related_form	00614999	1
10021892	_member_of_domain_usage	00651630	0
02519991	_derivationally_related_form	00259643	1
02190166	_member_meronym	00014405	0
01845627	_member_meronym	01855672	1
01855476	_verb_group	07531255	0
01390616	_derivationally_related_form	00113113	1
00272448	_instance_hypernym	06780882	0
14299070	_derivationally_related_form	00091124	1
02345272	_hypernym	00620424	0
01955508	_derivationally_related_form	00121645	1
02639606	_synset_domain_topic_of	02326198	0
01389329	_derivationally_related_form	00616083	1
05011790	_hypernym	01135529	0
00596393	_derivationally_related_form	10464542	1
01950502	_has_part	08382297	0
00601822	_derivationally_related_form	00180770	1
13421832	_similar_to	02958126	0
02530861	_also_see	00853776	1
02958126	_verb_group	03519578	0
00560893	_derivationally_related_form	00358931	1
00537682	_also_see	06624161	0
01856748	_hypernym	01507175	1
01177033	_synset_domain_topic_of	02880940	0
08877208	_instance_hypernym	08633957	1
04008947	_hypernym	05681117	0
06682794	_derivationally_related_form	01955127	1
03999992	_derivationally_related_form	05040275	0
13855627	_derivationally_related_form	00661213	1
05003090	_instance_hypernym	07288639	0
00838367	_derivationally_related_form	01179865	1
06669384	_also_see	13278375	0
03150232	_derivationally_related_form	01522276	1
01242716	_verb_group	01182293	0
01073822	_derivationally_related_form	04993413	1
01966706	_synset_domain_topic_of	07896994	0
01944692	_derivationally_related_form	02858304	1
07722217	_hypernym	01120448	0
00350889	_hypernym	00350461	1
03519981	_verb_group	05331404	0
02478059	_derivationally_related_form	14455700	1
01242716	_member_of_domain_usage	08033194	0
07238102	_derivationally_related_form	02677332	1
07537259	_hypernym	04641153	0
09424489	_derivationally_related_form	01816431	1
04055030	_member_of_domain_usage	10782791	0
02887209	_hypernym	04336034	1
04511002	_member_of_domain_usage	10408324	0
13580723	_derivationally_related_form	01193721	1
09302616	_verb_group	02669885	0
10093658	_derivationally_related_form	01140794	1
10209731	_member_of_domain_usage	13650045	0
00330160	_derivationally_related_form	00438178	1
02092309	_verb_group	06877578	0
13552270	_derivationally_related_form	00239614	1
02092309	_synset_domain_topic_of	02334867	0
01224744	_verb_group	00597385	1
01177033	_member_of_domain_usage	01850035	0
05219724	_has_part	05514905	1
08346655	_member_meronym	09302616	0
01354006	_derivationally_related_form	14705718	1
05695806	_member_of_domain_usage	00597957	0
01234345	_derivationally_related_form	00421535	1
10548227	_member_of_domain_usage	01955984	0
04576211	_has_part	04574999	1
00597957	_verb_group	10087736	0
02270165	_derivationally_related_form	10330189	1
03656484	_derivationally_related_form	10149527	0
00044673	_derivationally_related_form	00417001	1
10548681	_member_of_domain_usage	05734381	0
02250625	_derivationally_related_form	13282550	1
00683185	_member_meronym	02521816	0
00891216	_derivationally_related_form	13344804	1
00505802	_instance_hypernym	13326198	0
00182213	_derivationally_related_form	02461314	1
04863074	_derivationally_related_form	02746365	0
14622893	_has_part	14619225	1
13298935	_member_of_domain_usage	00889472	0
05238282	_has_part	05244934	1
10454972	_also_see	01234729	0
05174653	_derivationally_related_form	02519991	1
01574292	_also_see	04839676	0
13282550	_derivationally_related_form	02519991	1
00252710	_instance_hypernym	02521816	0
03933529	_derivationally_related_form	02085742	1
01646528	_verb_group	02384940	0
00366547	_derivationally_related_form	00357680	1
01850192	_synset_domain_topic_of	02958126	0
02519991	_derivationally_related_form	13290676	1
01954559	_derivationally_related_form	03057021	0
01493897	_derivationally_related_form	14425974	1
02064131	_also_see	08153874	0
04828255	_derivationally_related_form	01782519	1
00658052	_verb_group	03863262	0
08277805	_hypernym	08276720	1
00874977	_instance_hypernym	00651630	0
01406356	_verb_group	01406512	1
00239321	_instance_hypernym	01928838	0
01487311	_hypernym	01488956	1
03451473	_instance_hypernym	02331175	0
04980656	_derivationally_related_form	01053144	1
14299336	_member_of_domain_usage	00015303	0
15129927	_hypernym	05816790	1
00964343	_also_see	09287968	0
01537409	_derivationally_related_form	05244934	1
10183757	_synset_domain_topic_of	00443231	0
02531422	_also_see	00856860	1
15165490	_derivationally_related_form	08153874	0
05003090	_derivationally_related_form	01882170	1
01222645	_hypernym	00593108	0
02125641	_derivationally_related_form	05714466	1
14408086	_member_of_domain_usage	10026553	0
00113113	_derivationally_related_form	01754105	1
10320863	_synset_domain_topic_of	07537259	0
00695523	_also_see	01475282	1
01954559	_also_see	08253815	0
00658052	_derivationally_related_form	01009871	1
02334867	_member_of_domain_usage	03125870	0
06561942	_derivationally_related_form	00844298	1
13421832	_member_of_domain_usage	01216004	0
02235666	_verb_group	02537407	1
01725712	_has_part	01580928	0
13874073	_derivationally_related_form	00417001	1
05005250	_has_part	07071942	0
14971519	_derivationally_related_form	00238867	1
05695806	_hypernym	05003090	0
02291708	_synset_domain_topic_of	13333237	1
04339291	_derivationally_related_form	00431005	0
01150467	_hypernym	01150200	1
10637038	_member_of_domain_usage	10261388	0
13282550	_derivationally_related_form	02253456	1
07531255	_member_meronym	00761713	0
13720096	_hypernym	13716084	1
13617952	_derivationally_related_form	05289601	0
01167780	_derivationally_related_form	03200357	1
08675967	_similar_to	00856860	0
01475282	_also_see	02451951	1
09886010	_member_of_domain_usage	02911158	0
10330189	_derivationally_related_form	02269894	1
00724029	_hypernym	08431721	0
08612049	_has_part	08495617	1
10373998	_also_see	02725067	0
00105778	_derivationally_related_form	09930876	1
02551602	_member_meronym	07204401	0
10478960	_derivationally_related_form	02163301	1
00874977	_also_see	02174461	0
00842989	_derivationally_related_form	09762385	1
06695227	_hypernym	07569423	0
01097031	_derivationally_related_form	08397255	1
01574292	_has_part	10024119	0
00657728	_derivationally_related_form	00874977	1
01614079	_member_of_domain_usage	02439501	0
02196690	_derivationally_related_form	14599641	1
02669885	_instance_hypernym	11450566	0
01684337	_derivationally_related_form	00937656	1
05382729	_synset_domain_topic_of	10637038	0
00980908	_derivationally_related_form	06790042	1
03469493	_also_see	07577772	0
00658052	_derivationally_related_form	06483454	1
15228378	_also_see	08167365	0
05659365	_hypernym	05659621	1
14989820	_has_part	02112891	0
01074650	_derivationally_related_form	10112591	1
02893338	_also_see	01574292	0
02072501	_derivationally_related_form	13649791	1
09759311	_member_meronym	05245775	0
01227137	_also_see	01370590	1
00537682	_member_meronym	03078287	0
00800930	_hypernym	00685683	1
08346655	_verb_group	06882561	0
02250625	_derivationally_related_form	00259894	1
00810729	_similar_to	00272448	0
13573666	_hypernym	13575433	1
07573103	_derivationally_related_form	10548681	0
07551052	_derivationally_related_form	00859604	1
02331175	_synset_domain_topic_of	01887020	0
05527216	_has_part	05525628	1
06518253	_synset_domain_topic_of	04782116	0
00590148	_derivationally_related_form	09906986	1
09759501	_hypernym	00537682	0
09334396	_derivationally_related_form	01292727	1
00889831	_verb_group	02672187	0
00859604	_derivationally_related_form	01073241	1
10717921	_instance_hypernym	06624161	0
00843468	_derivationally_related_form	06730780	1
00538876	_has_part	14889479	0
09203827	_member_meronym	09316454	1
05706629	_member_meronym	01855476	0
00239614	_verb_group	00238867	1
06201136	_derivationally_related_form	03872495	0
01958615	_synset_domain_topic_of	00450335	1
02669885	_synset_domain_topic_of	05695806	0
02700104	_derivationally_related_form	00552841	1
00083975	_member_meronym	03821660	0
01960911	_derivationally_related_form	00442115	1
04993882	_similar_to	08167365	0
04236001	_hypernym	03895866	1
00810729	_similar_to	15160866	0
06685456	_derivationally_related_form	00890100	1
05003090	_instance_hypernym	09626238	0
00365188	_verb_group	00365647	1
03156405	_similar_to	01067512	0
07450343	_hypernym	07447641	1
08036849	_member_of_domain_usage	02334867	0
08871007	_has_part	08877208	1
01093587	_derivationally_related_form	01828736	0
00622584	_derivationally_related_form	01143838	1
01848648	_member_of_domain_usage	00651630	0
06767777	_derivationally_related_form	01058880	1
00889831	_similar_to	13292787	0
01820302	_derivationally_related_form	07491981	1
05731568	_member_meronym	02639606	0
10293332	_derivationally_related_form	01924505	1
13752679	_also_see	00815801	0
09759311	_derivationally_related_form	08280124	1
10280130	_instance_hypernym	00443231	0
02080577	_derivationally_related_form	02671880	1
05046009	_verb_group	10221312	0
00622266	_derivationally_related_form	01574292	1
03141065	_verb_group	07722485	0
04493505	_derivationally_related_form	02079525	1
06698252	_synset_domain_topic_of	00589769	0
03216828	_derivationally_related_form	01305731	1
13359941	_similar_to	04993882	0
00657550	_derivationally_related_form	05737153	1
01985029	_hypernym	03872495	0
13969243	_derivationally_related_form	02700104	1
10676018	_has_part	00858849	0
09612291	_derivationally_related_form	00869596	1
00537682	_similar_to	02784732	0
01526956	_derivationally_related_form	03872495	1
08311933	_verb_group	02027612	0
02672540	_derivationally_related_form	00259643	1
01135529	_synset_domain_topic_of	00274283	0
02058794	_also_see	02523275	1
03393017	_hypernym	09612131	0
05524615	_hypernym	05525252	1
05174653	_instance_hypernym	03171356	0
05014099	_derivationally_related_form	00328128	1
14405931	_also_see	01063695	0
02191766	_derivationally_related_form	05715864	1
00964343	_synset_domain_topic_of	04520480	0
00812274	_derivationally_related_form	01216004	1
01848123	_synset_domain_topic_of	01135529	0
10298912	_derivationally_related_form	00595146	1
13766896	_derivationally_related_form	00854150	0
01216522	_derivationally_related_form	00812526	1
07573103	_has_part	05177285	0
00299580	_derivationally_related_form	05755486	1
00958823	_hypernym	00358931	0
00085678	_derivationally_related_form	02274482	1
07573103	_verb_group	10388440	0
01547641	_verb_group	01547390	1
08167365	_similar_to	10142747	0
15183428	_hypernym	15157225	1
01035199	_verb_group	05245775	0
06200010	_derivationally_related_form	00350461	1
01646528	_hypernym	13969700	0
01027263	_derivationally_related_form	04659090	1
01957529	_hypernym	00514871	0
02085742	_derivationally_related_form	10655169	1
14299637	_instance_hypernym	00167934	0
01158690	_derivationally_related_form	00467717	1
01406684	_also_see	02017937	0
00851933	_derivationally_related_form	01224517	1
01106272	_member_meronym	06596179	0
00259643	_derivationally_related_form	02519991	1
00815801	_has_part	13359941	0
09826204	_derivationally_related_form	01941093	1
00537682	_has_part	07512465	0
13876371	_derivationally_related_form	02738544	1
01985029	_member_meronym	00651630	0
02120458	_derivationally_related_form	00513401	1
06596179	_derivationally_related_form	03469493	0
01524298	_hypernym	01524871	1
15200661	_has_part	13325010	0
02653996	_derivationally_related_form	02945161	1
00311663	_verb_group	04907269	0
10058411	_derivationally_related_form	01820302	1
03156405	_has_part	06904171	0
02834778	_has_part	04289690	1
07569106	_derivationally_related_form	10548227	0
02446164	_derivationally_related_form	00583461	1
08871007	_hypernym	05243704	0
00015303	_derivationally_related_form	00858849	1
01064148	_member_meronym	08691669	0
00842989	_derivationally_related_form	07234230	1
08280124	_similar_to	03519578	0
00320486	_derivationally_related_form	02001858	1
09367991	_also_see	01185981	0
00963241	_hypernym	00962129	1
02094755	_member_meronym	01121855	0
00356790	_derivationally_related_form	01387786	1
02017937	_synset_domain_topic_of	05826914	0
14585519	_derivationally_related_form	00330144	1
06596179	_member_of_domain_usage	00958823	0
01354405	_derivationally_related_form	04049405	1
01072072	_member_of_domain_usage	01406684	0
15145586	_has_part	15146545	1
00538876	_synset_domain_topic_of	10280130	0
02163301	_derivationally_related_form	01135529	1
00683185	_similar_to	14738752	0
04854389	_hypernym	04827652	1
00815173	_verb_group	02632567	0
01385920	_derivationally_related_form	09307300	1
03467984	_synset_domain_topic_of	00651630	0
00937656	_derivationally_related_form	01551871	1
09274500	_synset_domain_topic_of	01856225	0
02326695	_also_see	02451951	1
01684337	_instance_hypernym	01954559	0
13279262	_hypernym	13281275	1
02519991	_also_see	01523986	0
01179865	_derivationally_related_form	07800091	1
04730580	_similar_to	01093587	0
13875970	_derivationally_related_form	00143204	1
00984609	_also_see	07577772	0
01940403	_derivationally_related_form	00302394	1
02677332	_hypernym	01716227	0
00061290	_derivationally_related_form	01955127	1
00325785	_member_of_domain_usage	07204911	0
01951276	_derivationally_related_form	13326198	1
13594585	_member_meronym	02094755	0
00467717	_derivationally_related_form	13617952	1
01135795	_also_see	13345286	0
02632567	_hypernym	02632353	1
00853776	_hypernym	00853776	0
00963283	_derivationally_related_form	00963241	1
01305361	_has_part	00431005	0
01432601	_derivationally_related_form	10395073	1
01475282	_similar_to	00853776	0
01193099	_hypernym	01166351	1
06882561	_also_see	01966861	0
01961691	_synset_domain_topic_of	00441824	1
15228162	_synset_domain_topic_of	14426449	0
00443231	_hypernym	00442115	1
08555333	_has_part	01072072	0
13649791	_hypernym	13603305	1
08873269	_also_see	02919100	0
05058140	_derivationally_related_form	00438178	1
08626522	_member_meronym	06699225	0
01273263	_derivationally_related_form	02784732	1
08691669	_member_meronym	03656484	0
01131043	_also_see	02037272	1
10217436	_has_part	13292787	0
00136800	_derivationally_related_form	13446197	1
02994858	_instance_hypernym	07609840	0
01510827	_derivationally_related_form	14008806	1
00499066	_member_of_domain_usage	13757724	0
00683185	_also_see	01880531	1
15119536	_derivationally_related_form	05011790	0
00073828	_hypernym	00070965	1
01041762	_verb_group	02332999	0
01640850	_also_see	00666058	1
10320863	_hypernym	00274283	0
00658052	_derivationally_related_form	14429608	1
00463469	_derivationally_related_form	08626522	0
04565375	_derivationally_related_form	01087197	1
05382729	_synset_domain_topic_of	01065441	0
02123672	_derivationally_related_form	05713737	1
04008947	_verb_group	02893338	0
04046810	_hypernym	04048568	1
05289601	_derivationally_related_form	00589769	0
01958615	_synset_domain_topic_of	00299217	1
07884567	_synset_domain_topic_of	00026192	0
07480068	_hypernym	00026192	1
00252710	_similar_to	03130073	0
03933529	_derivationally_related_form	01305731	1
10722965	_verb_group	02210119	0
08894456	_has_part	08895928	1
01373844	_member_of_domain_usage	00882961	0
01193099	_derivationally_related_form	01073655	1
02027612	_member_of_domain_usage	03096960	0
02261464	_derivationally_related_form	08069878	1
04008947	_verb_group	01672607	0
01073655	_hypernym	01073241	1
06669384	_also_see	01854415	0
01535709	_also_see	01640850	1
10140783	_verb_group	03451473	0
00854000	_derivationally_related_form	01226600	1
02022359	_instance_hypernym	02965300	0
03000447	_derivationally_related_form	13575433	1
06624161	_member_meronym	06669384	0
10527334	_hypernym	10503452	1
01950502	_member_meronym	05706228	0
01840238	_derivationally_related_form	10096217	1
00810729	_has_part	04792127	0
00890100	_derivationally_related_form	06685456	1
03764822	_verb_group	00366547	0
13282007	_derivationally_related_form	02249741	1
13384877	_member_of_domain_usage	07442068	0
00014742	_derivationally_related_form	15273626	1
04460947	_similar_to	00182213	0
14798450	_hypernym	15010703	1
08871007	_synset_domain_topic_of	04460947	0
00208943	_derivationally_related_form	02405252	1
02463141	_verb_group	09626238	0
02667228	_hypernym	02666882	1
15228378	_derivationally_related_form	01574292	0
02332999	_derivationally_related_form	07556637	1
00293916	_has_part	02326695	0
01100145	_derivationally_related_form	10782791	1
04390873	_hypernym	02950482	0
14493426	_derivationally_related_form	02632567	1
00761713	_verb_group	04499660	0
09361517	_hypernym	09437454	1
07712382	_hypernym	13278375	0
01235258	_derivationally_related_form	01153486	1
13459322	_member_meronym	02964389	0
00852922	_hypernym	00849080	1
15160866	_has_part	11450566	0
00841628	_derivationally_related_form	01193721	1
10373998	_member_of_domain_usage	08431721	0
01167981	_derivationally_related_form	03200357	1
02332999	_also_see	00815173	0
00619183	_derivationally_related_form	15159819	1
10562968	_hypernym	10413276	0
01854415	_hypernym	01852861	1
02657219	_hypernym	07569106	0
09906848	_hypernym	10474645	1
14485064	_instance_hypernym	10334567	0
13858045	_hypernym	13857486	1
02893338	_hypernym	14425974	0
01845627	_member_meronym	01854047	1
06685456	_also_see	02672859	0
00105778	_derivationally_related_form	00513401	1
00121645	_hypernym	08879197	0
01510827	_derivationally_related_form	00409211	1
14429608	_instance_hypernym	02087156	0
01100145	_derivationally_related_form	10782940	1
00458754	_member_of_domain_usage	03399047	0
01639105	_derivationally_related_form	03772269	1
02402409	_hypernym	01547001	0
02384686	_derivationally_related_form	07186148	1
00739270	_also_see	05615147	0
14436875	_derivationally_related_form	02237631	1
02363128	_similar_to	02669885	0
14429608	_hypernym	14429985	1
00964343	_has_part	04595855	0
01182024	_derivationally_related_form	01197338	1
03150232	_verb_group	05091316	0
00459114	_hypernym	00458754	1
10280945	_instance_hypernym	04499660	0
05645199	_derivationally_related_form	00609100	1
05816790	_has_part	01182293	0
10768585	_derivationally_related_form	01093172	1
05382729	_also_see	09302616	0
00609506	_derivationally_related_form	01941093	1
00366547	_synset_domain_topic_of	01527271	0
01820302	_derivationally_related_form	10058411	1
00300317	_synset_domain_topic_of	10300154	0
04135315	_hypernym	03872495	1
10722965	_hypernym	07447641	0
00300317	_hypernym	00299580	1
08033194	_has_part	07569423	0
09622302	_derivationally_related_form	01775535	1
00274283	_derivationally_related_form	02746365	0
07238102	_derivationally_related_form	02636921	1
01185981	_member_of_domain_usage	10717921	0
07183151	_derivationally_related_form	00869126	1
00964105	_instance_hypernym	03764822	0
02043982	_derivationally_related_form	08612049	1
02331175	_member_meronym	13594585	0
00853633	_derivationally_related_form	06778102	1
04993882	_member_meronym	07512465	0
14889479	_derivationally_related_form	00239614	1
10160412	_similar_to	00810557	0
01941093	_derivationally_related_form	10433164	1
00815801	_also_see	07752264	0
00043480	_derivationally_related_form	05714466	1
06780882	_also_see	00252710	0
08278324	_hypernym	08276342	1
00962634	_has_part	05198036	0
09861946	_derivationally_related_form	01944692	1
00325785	_has_part	07775375	0
09747329	_derivationally_related_form	03130073	1
02381726	_member_meronym	01158596	0
05658603	_derivationally_related_form	02124748	1
05046009	_member_meronym	03971422	0
00724029	_derivationally_related_form	13421462	1
02210119	_instance_hypernym	01954559	0
01190840	_derivationally_related_form	07891726	1
02027612	_instance_hypernym	01580928	0
02274482	_derivationally_related_form	00085678	1
09281777	_synset_domain_topic_of	04902925	0
01020117	_similar_to	01017738	1
01222645	_synset_domain_topic_of	07204911	0
02174311	_derivationally_related_form	07380144	1
02964389	_hypernym	03469493	0
02464342	_hypernym	02463704	1
14455700	_derivationally_related_form	01740892	0
07460104	_derivationally_related_form	01914947	1
14429608	_instance_hypernym	02022359	0
00588473	_derivationally_related_form	09759501	1
02523275	_hypernym	01135795	0
00135718	_also_see	01880531	1
00765193	_derivationally_related_form	01527271	0
02053941	_verb_group	01849746	1
02188699	_hypernym	01120448	0
00550016	_derivationally_related_form	10318892	1
03451473	_synset_domain_topic_of	01121855	0
01021579	_derivationally_related_form	00958823	1
03150232	_also_see	14622893	0
01475282	_also_see	01613463	1
09810364	_member_meronym	07847453	0
00384620	_derivationally_related_form	00261405	1
01112364	_instance_hypernym	10702615	0
01203676	_derivationally_related_form	02662979	1
00121645	_member_meronym	00213353	0
13529616	_derivationally_related_form	02672859	1
08431721	_member_meronym	02188699	0
05046471	_hypernym	05046009	1
04993413	_hypernym	07071942	0
01387786	_derivationally_related_form	01741562	1
01547001	_member_meronym	07944050	0
00366547	_verb_group	00364868	1
00538876	_synset_domain_topic_of	05734381	0
00858849	_derivationally_related_form	00016380	1
13282007	_also_see	04641153	0
00076072	_hypernym	00074790	1
09626238	_member_meronym	09287968	0
03199901	_has_part	03905730	1
00451866	_member_meronym	00070965	0
00231567	_derivationally_related_form	02478059	1
05695806	_verb_group	08504851	0
15166462	_has_part	15169421	1
00964343	_hypernym	00431005	0
08654360	_hypernym	08491826	1
00589309	_synset_domain_topic_of	01954559	0
13622591	_has_part	13622209	1
01216004	_member_meronym	05003090	0
00657550	_derivationally_related_form	00874977	1
03999992	_similar_to	10388440	0
00453935	_derivationally_related_form	01140794	1
04008947	_member_of_domain_usage	05046009	0
00754731	_derivationally_related_form	10672192	1
02743112	_member_meronym	01106272	0
04665813	_derivationally_related_form	02529284	1
02964389	_hypernym	01093587	0
02402409	_derivationally_related_form	00215838	1
08346655	_derivationally_related_form	13325010	0
01882170	_derivationally_related_form	04544979	1
13617952	_similar_to	01606205	0
00302394	_derivationally_related_form	01941093	1
13875970	_hypernym	03101796	0
14619225	_has_part	09272085	1
13325010	_member_of_domain_usage	02261642	0
02652494	_derivationally_related_form	10269458	1
06669384	_synset_domain_topic_of	08626522	0
04046810	_derivationally_related_form	01954559	1
01185981	_member_of_domain_usage	01234729	0
01186208	_hypernym	01194418	1
10160412	_instance_hypernym	01740892	0
00759694	_derivationally_related_form	10702781	1
02028722	_has_part	01985029	0
00660102	_derivationally_related_form	10506762	1
01954559	_also_see	07204911	0
15122231	_derivationally_related_form	00490968	1
02387910	_has_part	01954559	0
08571139	_hypernym	08523483	1
01135529	_has_part	02632353	0
15166462	_has_part	15169248	1
00324231	_derivationally_related_form	07512465	0
04440749	_hypernym	03533972	1
03764822	_hypernym	00889472	0
02519991	_derivationally_related_form	13341756	1
08675967	_hypernym	00506040	0
07847198	_derivationally_related_form	01418037	1
13650045	_member_meronym	02094755	0
01242716	_derivationally_related_form	02512922	1
01219993	_synset_domain_topic_of	01574292	0
09889941	_hypernym	10744164	1
00293916	_has_part	02092309	0
02252931	_derivationally_related_form	01120448	1
02261464	_also_see	01064148	0
02566227	_derivationally_related_form	10157744	1
00550016	_member_meronym	00962634	0
04157320	_derivationally_related_form	01551871	1
07447641	_synset_domain_topic_of	04081281	0
09334396	_derivationally_related_form	02022359	1
09307300	_verb_group	08153874	0
01996735	_derivationally_related_form	08428019	1
05091316	_instance_hypernym	13594585	0
10529965	_derivationally_related_form	01957529	1
10280130	_instance_hypernym	10515194	0
10769321	_derivationally_related_form	02493260	1
02334867	_member_of_domain_usage	00538876	0
01940403	_derivationally_related_form	10096217	1
00252710	_synset_domain_topic_of	14585519	0
00555648	_derivationally_related_form	02055649	1
00815173	_verb_group	07204401	0
06508816	_derivationally_related_form	01001643	1
15165490	_member_meronym	02094755	0
03309465	_has_part	04082886	1
07577772	_hypernym	01828736	0
00239614	_hypernym	00239321	1
13650045	_member_of_domain_usage	02329883	0
02005756	_derivationally_related_form	04864515	1
03519578	_similar_to	10548227	0
01782218	_derivationally_related_form	07520612	1
04863074	_similar_to	00143204	0
01223182	_derivationally_related_form	13877918	1
08657249	_hypernym	00537682	0
01136614	_derivationally_related_form	03467984	1
00186634	_similar_to	02126022	0
02478059	_derivationally_related_form	00231567	1
05243704	_verb_group	03125870	0
00595146	_derivationally_related_form	10298912	1
02398463	_similar_to	06699225	0
00980908	_derivationally_related_form	05960464	1
10026553	_synset_domain_topic_of	02027612	0
00365188	_derivationally_related_form	00365471	1
10683126	_has_part	01406684	0
07543288	_derivationally_related_form	01775164	1
01542252	_has_part	13278375	0
06778102	_derivationally_related_form	00105554	1
04993413	_similar_to	14485064	0
00891216	_derivationally_related_form	10209731	1
04713692	_synset_domain_topic_of	07234230	0
10760340	_derivationally_related_form	02461314	1
03078287	_derivationally_related_form	14299637	0
13358549	_hypernym	13384557	1
02784732	_instance_hypernym	01177703	0
00074790	_hypernym	00070965	1
10183757	_member_meronym	08153874	0
00452293	_derivationally_related_form	02003601	1
06263369	_hypernym	08657249	0
02994858	_derivationally_related_form	00329831	1
07622261	_similar_to	04381994	0
15165490	_hypernym	15228378	1
00815173	_similar_to	07531255	0
02210119	_verb_group	02236124	1
10069645	_member_meronym	02401809	0
00643197	_derivationally_related_form	09790278	1
02190166	_hypernym	00418615	0
02529284	_derivationally_related_form	00066397	1
07884567	_has_part	00616083	0
00264875	_derivationally_related_form	13426238	1
08626522	_has_part	05177285	0
00754731	_derivationally_related_form	06513366	1
00609506	_has_part	00889472	0
01219706	_derivationally_related_form	02886599	1
01848648	_verb_group	05243879	0
08587828	_hypernym	08491826	1
01216004	_synset_domain_topic_of	02551602	0
01765392	_derivationally_related_form	00759551	1
01354405	_instance_hypernym	05525628	0
02046755	_derivationally_related_form	07440979	1
05734381	_derivationally_related_form	00388210	0
06201136	_derivationally_related_form	10402086	1
05046009	_verb_group	07643026	0
00882961	_derivationally_related_form	02123672	1
00421535	_instance_hypernym	15200661	0
04660080	_hypernym	05207130	1
06882561	_hypernym	07712382	0
04879658	_derivationally_related_form	00963283	1
01954559	_similar_to	04606574	0
10051975	_derivationally_related_form	00416135	1
13298935	_hypernym	15235126	0
02079525	_derivationally_related_form	05246511	1
09759311	_synset_domain_topic_of	00962634	0
01510827	_derivationally_related_form	07338114	1
02706816	_synset_domain_topic_of	00026192	0
14889479	_hypernym	14865800	1
06883073	_verb_group	00597957	0
10084635	_derivationally_related_form	00800421	1
00958823	_synset_domain_topic_of	08382297	0
09790278	_hypernym	10488016	1
01646528	_hypernym	03003730	0
07246742	_derivationally_related_form	00807461	1
03156405	_member_of_domain_usage	02521816	0
00087152	_also_see	01922763	1
01112364	_synset_domain_topic_of	13319726	0
07204911	_derivationally_related_form	02473431	1
06877578	_verb_group	10285135	0
10299250	_derivationally_related_form	02592397	1
01063695	_member_of_domain_usage	01021579	0
07677593	_hypernym	07675627	1
02332999	_member_of_domain_usage	01781983	0
05714161	_hypernym	05713737	1
00252710	_hypernym	00350461	0
10433737	_derivationally_related_form	01180975	1
01928838	_hypernym	00589309	0
00849080	_derivationally_related_form	10561320	1
02911158	_member_meronym	00212049	0
00302394	_derivationally_related_form	01940403	1
03150232	_similar_to	04005630	0
02344243	_hypernym	02344060	1
08168117	_verb_group	01073822	0
00258854	_derivationally_related_form	00199659	1
10181990	_member_meronym	08167365	0
01960911	_derivationally_related_form	10683126	1
13390857	_hypernym	07569423	0
01912893	_derivationally_related_form	04544979	1
01848648	_hypernym	01093587	0
02368336	_also_see	02395115	1
05046009	_synset_domain_topic_of	01574292	0
02037272	_also_see	01549291	1
00419950	_instance_hypernym	13650045	0
02738031	_hypernym	04566257	1
07752264	_verb_group	06878071	0
07186148	_derivationally_related_form	01470225	1
00772813	_synset_domain_topic_of	07123288	0
00031820	_also_see	00802136	1
06904171	_member_meronym	06263369	0
02395115	_also_see	01073822	1
02112891	_has_part	01063695	0
02583139	_derivationally_related_form	00962129	1
10077593	_member_of_domain_usage	09281777	0
04465933	_hypernym	03605722	1
03891051	_hypernym	10637038	0
02523275	_derivationally_related_form	05042871	1
01489989	_has_part	08410688	0
02657219	_derivationally_related_form	04713428	1
10280945	_similar_to	10285135	0
00070965	_derivationally_related_form	00842538	1
08876773	_also_see	00300317	0
09759311	_derivationally_related_form	08279298	1
14889479	_verb_group	03096960	0
01522052	_derivationally_related_form	00345641	1
10149527	_verb_group	01856748	0
14425974	_derivationally_related_form	01489722	1
01854415	_similar_to	00209546	0
15159819	_derivationally_related_form	00619183	1
07537259	_has_part	00514871	0
01570562	_hypernym	01387786	1
02237631	_member_of_domain_usage	08555333	0
00616857	_derivationally_related_form	10351625	1
03393017	_verb_group	02003601	0
00739270	_derivationally_related_form	00311663	1
01418179	_instance_hypernym	13326198	0
02274482	_derivationally_related_form	09810364	1
02098458	_instance_hypernym	00213353	0
02418205	_derivationally_related_form	05769471	1
00882961	_hypernym	00182213	0
15170786	_has_part	15171008	1
04993882	_verb_group	00239321	0
01857632	_derivationally_related_form	01053339	1
07512465	_synset_domain_topic_of	00511041	0
09366017	_hypernym	09287968	1
02463704	_derivationally_related_form	00325785	0
04842515	_derivationally_related_form	01587077	1
00597957	_derivationally_related_form	03519981	0
02462580	_verb_group	02461314	1
02911158	_hypernym	01646528	0
02389220	_derivationally_related_form	13939353	1
02331919	_hypernym	06254669	0
02022486	_derivationally_related_form	09334396	1
08691669	_member_of_domain_usage	07575510	0
04713428	_derivationally_related_form	02657219	1
03519578	_member_of_domain_usage	08033194	0
00511212	_hypernym	00510189	1
00511041	_also_see	03971422	0
09879744	_derivationally_related_form	02566227	1
01725712	_derivationally_related_form	10548681	0
00321486	_derivationally_related_form	03873064	1
01849746	_member_of_domain_usage	07884567	0
00259894	_derivationally_related_form	02250625	1
10181990	_hypernym	04305323	0
02924116	_derivationally_related_form	01949110	1
06904171	_similar_to	00854150	0
10002760	_derivationally_related_form	02521410	1
03399047	_member_meronym	04005630	0
00135718	_derivationally_related_form	04721650	1
10209731	_has_part	03003344	0
02055649	_derivationally_related_form	00330160	1
05289601	_derivationally_related_form	06780882	0
01522276	_derivationally_related_form	10781984	1
05040275	_member_meronym	00538876	0
00922867	_derivationally_related_form	01004582	1
01256157	_hypernym	15163797	0
02667900	_hypernym	02657219	1
09612131	_instance_hypernym	01354405	0
08895771	_instance_hypernym	08524735	1
04995211	_member_of_domain_usage	08167953	0
15137047	_hypernym	15163005	1
07204401	_synset_domain_topic_of	10160412	0
02700104	_verb_group	02657219	1
00143204	_member_of_domain_usage	08392137	0
03624966	_derivationally_related_form	01671039	1
01855476	_similar_to	00724029	0
02402409	_hypernym	02405252	1
01580928	_verb_group	02334867	0
