# Supplementary material
Source: ML conference proceedings conference paper supplement (https://proceedings.neurips.cc/paper_files/paper/2021/hash/0fd600c953cde8121262e322ef09f70e-Abstract.html)
Supplement: Supplementary file 1 [file 0fd600c953cde8121262e322ef09f70e-Supplemental.zip › Supplementary_Material_Paper_8745/data/GraIL-BM_WN18RR_v2/test/test-random-sample/test7.txt]

08858942	_has_part	08890097	1
00858377	_verb_group	07696527	0
01725712	_derivationally_related_form	07480896	1
13969700	_member_of_domain_usage	04370048	0
02542280	_derivationally_related_form	01203676	1
04993882	_member_of_domain_usage	01219993	0
10515194	_derivationally_related_form	05945508	1
01118614	_synset_domain_topic_of	09203827	0
01958615	_derivationally_related_form	00299217	1
01242716	_has_part	14485064	0
01398212	_hypernym	14989820	1
14455700	_verb_group	14426449	0
02112891	_hypernym	02112029	1
05611302	_similar_to	00849080	0
04695963	_derivationally_related_form	01537409	1
00388210	_has_part	07890068	0
02491383	_derivationally_related_form	10526096	1
02001461	_verb_group	00958823	0
10489944	_hypernym	10707233	1
10280130	_hypernym	00418615	0
01856225	_member_meronym	01856553	1
00272448	_member_meronym	09810364	0
05748786	_derivationally_related_form	02666882	1
03764822	_verb_group	08285896	0
00812526	_derivationally_related_form	01572978	1
14889479	_instance_hypernym	08691669	0
01949110	_hypernym	01955984	1
00409211	_hypernym	15234764	0
02064131	_derivationally_related_form	13774404	1
01072072	_hypernym	14738752	0
09334396	_derivationally_related_form	01502762	1
06715786	_derivationally_related_form	01966861	0
09688008	_derivationally_related_form	02957823	1
02087156	_derivationally_related_form	01112364	0
05715864	_derivationally_related_form	02194495	1
01672607	_verb_group	00514871	0
04926427	_hypernym	04924103	1
01906823	_member_meronym	10140783	0
14798450	_derivationally_related_form	02627221	1
01966861	_member_meronym	00252710	0
01098869	_derivationally_related_form	01156438	1
03823540	_instance_hypernym	01118614	0
01926984	_verb_group	02099829	1
09302616	_verb_group	03003730	0
02964389	_derivationally_related_form	01612084	1
07182485	_member_meronym	01542252	0
07635155	_hypernym	07628870	1
01489722	_also_see	02261464	0
13291189	_derivationally_related_form	02543874	1
00451866	_member_of_domain_usage	07531255	0
00753428	_hypernym	00752493	1
04370048	_member_of_domain_usage	00350461	0
01144657	_derivationally_related_form	00452293	1
01940403	_instance_hypernym	02657219	0
01131043	_also_see	01125429	1
00026385	_also_see	08285896	0
01073241	_derivationally_related_form	01182293	1
00014405	_derivationally_related_form	08382297	0
01074650	_also_see	02530861	1
00858849	_member_of_domain_usage	02950482	0
10488016	_hypernym	10632576	1
03467984	_synset_domain_topic_of	02334867	0
02632567	_derivationally_related_form	14493426	1
04081281	_member_meronym	00810557	0
08277805	_derivationally_related_form	09759311	1
13278375	_instance_hypernym	05527216	0
05050379	_hypernym	05050115	1
06764623	_member_of_domain_usage	01086945	0
00470084	_derivationally_related_form	00233386	1
00889472	_member_meronym	09262690	0
02666943	_derivationally_related_form	01322854	1
04995211	_synset_domain_topic_of	06624161	0
08873622	_has_part	08597023	1
04839676	_member_of_domain_usage	13875571	0
01781983	_derivationally_related_form	14405931	1
00233386	_member_of_domain_usage	02261464	0
00299217	_derivationally_related_form	01958615	1
08555333	_synset_domain_topic_of	03872495	0
06220616	_hypernym	06212839	1
03479397	_derivationally_related_form	06715786	0
01904293	_derivationally_related_form	09281777	1
00384620	_member_of_domain_usage	07537259	0
00481739	_derivationally_related_form	06667317	1
00505802	_hypernym	13875571	0
01182293	_derivationally_related_form	04638585	1
01219993	_derivationally_related_form	04993882	0
02046755	_derivationally_related_form	13878112	1
06946497	_has_part	14299336	0
07813107	_derivationally_related_form	00213353	1
01848976	_member_of_domain_usage	09626238	0
00467717	_derivationally_related_form	05924920	1
02044278	_member_of_domain_usage	04993882	0
09759311	_derivationally_related_form	02669885	1
05006898	_similar_to	13326198	0
00409211	_derivationally_related_form	02443849	1
10300154	_also_see	04595855	0
01775535	_hypernym	01775164	1
13766896	_hypernym	00015303	0
10672662	_derivationally_related_form	05186306	1
10021892	_member_meronym	02028722	0
05707146	_derivationally_related_form	00614999	1
01614079	_similar_to	08626522	0
02519991	_derivationally_related_form	00259643	1
07775375	_hypernym	10676018	0
01845627	_member_meronym	01855672	1
10529965	_has_part	01672607	0
01390616	_derivationally_related_form	00113113	1
08392137	_has_part	01216004	0
14299070	_derivationally_related_form	00091124	1
01850192	_similar_to	01547001	0
01955508	_derivationally_related_form	00121645	1
04499660	_instance_hypernym	04792127	0
01389329	_derivationally_related_form	00616083	1
09437454	_similar_to	06685456	0
00596393	_derivationally_related_form	10464542	1
03971422	_verb_group	00083975	0
00601822	_derivationally_related_form	00180770	1
15237567	_verb_group	03624966	0
02530861	_also_see	00853776	1
14408086	_verb_group	08871007	0
00560893	_derivationally_related_form	00358931	1
03519578	_has_part	00609506	0
01856748	_hypernym	01507175	1
03904183	_similar_to	01489989	0
08877208	_instance_hypernym	08633957	1
01305361	_verb_group	10042300	0
06682794	_derivationally_related_form	01955127	1
04499660	_has_part	00293916	0
13855627	_derivationally_related_form	00661213	1
10181990	_instance_hypernym	04305323	0
00838367	_derivationally_related_form	01179865	1
01524871	_has_part	05245775	0
03150232	_derivationally_related_form	01522276	1
00514658	_similar_to	05959954	0
01073822	_derivationally_related_form	04993413	1
00272448	_similar_to	04055030	0
01944692	_derivationally_related_form	02858304	1
08346655	_hypernym	15160866	0
00350889	_hypernym	00350461	1
13278375	_derivationally_related_form	01222645	0
02478059	_derivationally_related_form	14455700	1
09281777	_member_meronym	07531255	0
07238102	_derivationally_related_form	02677332	1
10334567	_hypernym	00233386	0
09424489	_derivationally_related_form	01816431	1
01945381	_similar_to	00499066	0
02887209	_hypernym	04336034	1
00143204	_hypernym	00450866	0
13580723	_derivationally_related_form	01193721	1
04460947	_instance_hypernym	06263609	0
10093658	_derivationally_related_form	01140794	1
06764623	_similar_to	06669384	0
00330160	_derivationally_related_form	00438178	1
07643026	_similar_to	04993882	0
13552270	_derivationally_related_form	00239614	1
02911158	_synset_domain_topic_of	04339291	0
01224744	_verb_group	00597385	1
03479397	_member_of_domain_usage	10261388	0
05219724	_has_part	05514905	1
00962634	_also_see	00418615	0
01354006	_derivationally_related_form	14705718	1
02381726	_member_of_domain_usage	00973077	0
01234345	_derivationally_related_form	00421535	1
02044278	_derivationally_related_form	10164747	0
04576211	_has_part	04574999	1
07751451	_member_of_domain_usage	08877208	0
02270165	_derivationally_related_form	10330189	1
10164747	_synset_domain_topic_of	00365471	0
00044673	_derivationally_related_form	00417001	1
07896994	_derivationally_related_form	04511002	0
02250625	_derivationally_related_form	13282550	1
00504592	_verb_group	01966861	0
00891216	_derivationally_related_form	13344804	1
15228378	_instance_hypernym	07752264	0
00182213	_derivationally_related_form	02461314	1
08346655	_verb_group	05259240	0
14622893	_has_part	14619225	1
07752264	_synset_domain_topic_of	07288639	0
05238282	_has_part	05244934	1
06878071	_has_part	00014742	0
05174653	_derivationally_related_form	02519991	1
04792127	_similar_to	07847453	0
13282550	_derivationally_related_form	02519991	1
06904171	_verb_group	01035199	0
03933529	_derivationally_related_form	02085742	1
03216828	_has_part	10722965	0
00366547	_derivationally_related_form	00357680	1
10017422	_similar_to	02439501	0
02519991	_derivationally_related_form	13290676	1
06695227	_member_meronym	00212049	0
01493897	_derivationally_related_form	14425974	1
14408086	_verb_group	00233386	0
04828255	_derivationally_related_form	01782519	1
10782791	_has_part	08153874	0
08277805	_hypernym	08276720	1
10515194	_member_meronym	03101796	0
01406356	_verb_group	01406512	1
08253815	_instance_hypernym	03694761	0
01487311	_hypernym	01488956	1
00366547	_verb_group	01063695	0
04980656	_derivationally_related_form	01053144	1
10117511	_derivationally_related_form	10142747	0
15129927	_hypernym	05816790	1
00739270	_hypernym	10373998	0
01537409	_derivationally_related_form	05244934	1
00849080	_hypernym	09892831	0
02531422	_also_see	00856860	1
02725067	_similar_to	03624966	0
05003090	_derivationally_related_form	01882170	1
03101796	_member_meronym	08871007	0
02125641	_derivationally_related_form	05714466	1
00015303	_member_meronym	05525628	0
00113113	_derivationally_related_form	01754105	1
00815173	_instance_hypernym	07537259	0
00695523	_also_see	01475282	1
07751451	_member_meronym	15237567	0
00658052	_derivationally_related_form	01009871	1
01542252	_has_part	05695806	0
06561942	_derivationally_related_form	00844298	1
02334867	_similar_to	09218641	0
02235666	_verb_group	02537407	1
05046009	_hypernym	04339291	0
13874073	_derivationally_related_form	00417001	1
01524298	_derivationally_related_form	04659090	0
14971519	_derivationally_related_form	00238867	1
09262690	_hypernym	00622266	0
02291708	_synset_domain_topic_of	13333237	1
01983771	_synset_domain_topic_of	09810364	0
01150467	_hypernym	01150200	1
07531255	_derivationally_related_form	01855476	0
13282550	_derivationally_related_form	02253456	1
00207728	_verb_group	01304121	0
13720096	_hypernym	13716084	1
13282007	_also_see	08431721	0
01167780	_derivationally_related_form	03200357	1
10683126	_similar_to	01035199	0
01475282	_also_see	02451951	1
05960464	_derivationally_related_form	01185981	0
10330189	_derivationally_related_form	02269894	1
01906823	_verb_group	05074374	0
08612049	_has_part	08495617	1
10024119	_has_part	02381726	0
00105778	_derivationally_related_form	09930876	1
00616083	_derivationally_related_form	01118614	0
10478960	_derivationally_related_form	02163301	1
00964343	_member_of_domain_usage	07447641	0
00842989	_derivationally_related_form	09762385	1
04595855	_instance_hypernym	10300154	0
01097031	_derivationally_related_form	08397255	1
13594585	_verb_group	01063695	0
00657728	_derivationally_related_form	00874977	1
10017422	_synset_domain_topic_of	04081281	0
02196690	_derivationally_related_form	14599641	1
10181990	_instance_hypernym	00882961	0
01684337	_derivationally_related_form	00937656	1
09626238	_similar_to	00143204	0
00980908	_derivationally_related_form	06790042	1
07921455	_member_of_domain_usage	00622266	0
00658052	_derivationally_related_form	06483454	1
08879197	_instance_hypernym	02706816	0
05659365	_hypernym	05659621	1
00014405	_instance_hypernym	01950502	0
01074650	_derivationally_related_form	10112591	1
08657249	_has_part	14008806	0
02072501	_derivationally_related_form	13649791	1
14585519	_hypernym	01054227	0
01227137	_also_see	01370590	1
00550242	_instance_hypernym	05681117	0
00800930	_hypernym	00685683	1
10042300	_synset_domain_topic_of	06764623	0
02250625	_derivationally_related_form	00259894	1
00882961	_instance_hypernym	09889941	0
13573666	_hypernym	13575433	1
01432601	_has_part	00683185	0
07551052	_derivationally_related_form	00859604	1
02188699	_similar_to	01135795	0
05527216	_has_part	05525628	1
03130073	_verb_group	04020617	0
00590148	_derivationally_related_form	09906986	1
10454972	_also_see	07889814	0
09334396	_derivationally_related_form	01292727	1
08167953	_derivationally_related_form	15228378	0
00859604	_derivationally_related_form	01073241	1
10160412	_synset_domain_topic_of	00213353	0
00843468	_derivationally_related_form	06730780	1
03479397	_hypernym	13757724	0
09203827	_member_meronym	09316454	1
02022359	_member_meronym	07531255	0
00239614	_verb_group	00238867	1
03891051	_has_part	00421535	0
01958615	_synset_domain_topic_of	00450335	1
01093587	_hypernym	07883860	0
02700104	_derivationally_related_form	00552841	1
01574292	_instance_hypernym	00511041	0
01960911	_derivationally_related_form	00442115	1
02005756	_instance_hypernym	13985818	0
04236001	_hypernym	03895866	1
05289601	_has_part	07696527	0
06685456	_derivationally_related_form	00890100	1
02237631	_instance_hypernym	01765392	0
00365188	_verb_group	00365647	1
10280945	_verb_group	06780882	0
07450343	_hypernym	07447641	1
03125870	_member_of_domain_usage	07573103	0
08871007	_has_part	08877208	1
06960298	_instance_hypernym	07450343	0
00622584	_derivationally_related_form	01143838	1
05331404	_verb_group	07447641	0
06767777	_derivationally_related_form	01058880	1
09889941	_member_of_domain_usage	02326198	0
01820302	_derivationally_related_form	07491981	1
04659090	_derivationally_related_form	01305241	0
10293332	_derivationally_related_form	01924505	1
06254669	_verb_group	06268784	0
09759311	_derivationally_related_form	08280124	1
00365471	_synset_domain_topic_of	01853072	0
02080577	_derivationally_related_form	02671880	1
00739270	_instance_hypernym	04008947	0
00622266	_derivationally_related_form	01574292	1
07921455	_synset_domain_topic_of	10162991	0
04493505	_derivationally_related_form	02079525	1
01531265	_has_part	04906273	0
03216828	_derivationally_related_form	01305731	1
15160866	_similar_to	02064131	0
00657550	_derivationally_related_form	05737153	1
04468005	_verb_group	10717921	0
13969243	_derivationally_related_form	02700104	1
07752264	_similar_to	02363128	0
09612291	_derivationally_related_form	00869596	1
07577772	_instance_hypernym	01985029	0
01526956	_derivationally_related_form	03872495	1
02439501	_also_see	01614079	0
02672540	_derivationally_related_form	00259643	1
00622266	_derivationally_related_form	03999992	0
02058794	_also_see	02523275	1
01432601	_also_see	00167934	0
05524615	_hypernym	05525252	1
00609100	_member_meronym	04641153	0
05014099	_derivationally_related_form	00328128	1
06777687	_hypernym	14889479	0
02191766	_derivationally_related_form	05715864	1
15234764	_also_see	00417859	0
00812274	_derivationally_related_form	01216004	1
01527271	_similar_to	00140393	0
10298912	_derivationally_related_form	00595146	1
02463704	_also_see	14585519	0
01216522	_derivationally_related_form	00812526	1
02984061	_similar_to	01606205	0
00299580	_derivationally_related_form	05755486	1
11450566	_synset_domain_topic_of	13617952	0
00085678	_derivationally_related_form	02274482	1
08555333	_member_meronym	08153874	0
01547641	_verb_group	01547390	1
00366547	_similar_to	01041762	0
15183428	_hypernym	15157225	1
00358931	_hypernym	07442068	0
06200010	_derivationally_related_form	00350461	1
01117723	_member_of_domain_usage	00070965	0
01027263	_derivationally_related_form	04659090	1
01167981	_similar_to	03469493	0
02085742	_derivationally_related_form	10655169	1
05960464	_derivationally_related_form	10042300	0
01158690	_derivationally_related_form	00467717	1
01945381	_similar_to	00350461	0
00851933	_derivationally_related_form	01224517	1
00143204	_derivationally_related_form	05003090	0
00259643	_derivationally_related_form	02519991	1
08168117	_also_see	10570019	0
09826204	_derivationally_related_form	01941093	1
05198036	_has_part	06960298	0
13876371	_derivationally_related_form	02738544	1
00683185	_verb_group	09612131	0
02120458	_derivationally_related_form	00513401	1
02746365	_member_of_domain_usage	14585519	0
01524298	_hypernym	01524871	1
02958126	_synset_domain_topic_of	04713692	0
02653996	_derivationally_related_form	02945161	1
02725067	_similar_to	01219993	0
10058411	_derivationally_related_form	01820302	1
00854150	_member_of_domain_usage	06263369	0
02834778	_has_part	04289690	1
01098698	_similar_to	08077292	0
02446164	_derivationally_related_form	00583461	1
14989820	_instance_hypernym	03451473	0
00015303	_derivationally_related_form	00858849	1
15160866	_has_part	02669885	0
00842989	_derivationally_related_form	07234230	1
07569423	_hypernym	08410688	0
00320486	_derivationally_related_form	02001858	1
10261388	_also_see	07531255	0
00963241	_hypernym	00962129	1
04257986	_hypernym	00365471	0
00356790	_derivationally_related_form	01387786	1
00358931	_derivationally_related_form	01067512	0
14585519	_derivationally_related_form	00330144	1
00273963	_instance_hypernym	06698252	0
01354405	_derivationally_related_form	04049405	1
00458754	_instance_hypernym	15235126	0
15145586	_has_part	15146545	1
13766896	_member_meronym	13384877	0
02163301	_derivationally_related_form	01135529	1
02000868	_hypernym	13875571	0
04854389	_hypernym	04827652	1
10644598	_instance_hypernym	03513627	0
01385920	_derivationally_related_form	09307300	1
01304121	_synset_domain_topic_of	07537259	0
00937656	_derivationally_related_form	01551871	1
10160412	_similar_to	01121855	0
02326695	_also_see	02451951	1
01489722	_derivationally_related_form	00014405	0
13279262	_hypernym	13281275	1
01855476	_member_meronym	02632353	0
01179865	_derivationally_related_form	07800091	1
01117723	_has_part	03891051	0
13875970	_derivationally_related_form	00143204	1
02958126	_member_of_domain_usage	04005630	0
01940403	_derivationally_related_form	00302394	1
14485064	_member_meronym	10024119	0
00061290	_derivationally_related_form	01955127	1
00290579	_derivationally_related_form	01063695	0
01951276	_derivationally_related_form	13326198	1
02174461	_verb_group	02632353	0
00467717	_derivationally_related_form	13617952	1
08167365	_also_see	10077593	0
02632567	_hypernym	02632353	1
03003344	_also_see	10160412	0
00963283	_derivationally_related_form	00963241	1
10548227	_member_meronym	01672607	0
01432601	_derivationally_related_form	10395073	1
14989820	_also_see	08617963	0
01193099	_hypernym	01166351	1
07186148	_verb_group	09892831	0
01961691	_synset_domain_topic_of	00441824	1
01242716	_instance_hypernym	06695227	0
00443231	_hypernym	00442115	1
00274283	_has_part	07204911	0
13649791	_hypernym	13603305	1
15119536	_hypernym	10140783	0
05058140	_derivationally_related_form	00438178	1
05734381	_member_of_domain_usage	00233386	0
01273263	_derivationally_related_form	02784732	1
03656484	_member_of_domain_usage	06268784	0
01131043	_also_see	02037272	1
01524871	_derivationally_related_form	00885925	0
00136800	_derivationally_related_form	13446197	1
07810907	_has_part	06263609	0
01510827	_derivationally_related_form	14008806	1
05681117	_derivationally_related_form	01855476	0
00683185	_also_see	01880531	1
04159354	_member_of_domain_usage	05615147	0
00073828	_hypernym	00070965	1
07944050	_also_see	08285896	0
01640850	_also_see	00666058	1
00984609	_verb_group	05826914	0
00658052	_derivationally_related_form	14429608	1
04520480	_also_see	13358549	0
04565375	_derivationally_related_form	01087197	1
00311663	_similar_to	08871007	0
02123672	_derivationally_related_form	05713737	1
02005756	_verb_group	00878052	0
04046810	_hypernym	04048568	1
02984061	_similar_to	00858377	0
01958615	_synset_domain_topic_of	00299217	1
04994413	_member_of_domain_usage	00882961	0
07480068	_hypernym	00026192	1
02005756	_derivationally_related_form	07751451	0
03933529	_derivationally_related_form	01305731	1
00622266	_synset_domain_topic_of	00207728	0
08894456	_has_part	08895928	1
00358931	_also_see	07442068	0
01193099	_derivationally_related_form	01073655	1
02261642	_hypernym	01966861	0
02261464	_derivationally_related_form	08069878	1
06960298	_verb_group	05525628	0
01073655	_hypernym	01073241	1
01510827	_similar_to	09759311	0
01535709	_also_see	01640850	1
01054227	_instance_hypernym	00274283	0
00854000	_derivationally_related_form	01226600	1
00300317	_similar_to	15259284	0
03000447	_derivationally_related_form	13575433	1
01304121	_member_of_domain_usage	01851996	0
10527334	_hypernym	10503452	1
10261388	_similar_to	01112364	0
01840238	_derivationally_related_form	10096217	1
13282007	_hypernym	02893338	0
00890100	_derivationally_related_form	06685456	1
01828736	_has_part	07450343	0
13282007	_derivationally_related_form	02249741	1
05091316	_verb_group	10676018	0
00014742	_derivationally_related_form	15273626	1
00418615	_hypernym	05243704	0
14798450	_hypernym	15010703	1
01354405	_also_see	08555333	0
00208943	_derivationally_related_form	02405252	1
05734381	_similar_to	09203827	0
02667228	_hypernym	02666882	1
02387910	_derivationally_related_form	03130073	0
02332999	_derivationally_related_form	07556637	1
08346655	_also_see	04792127	0
01100145	_derivationally_related_form	10782791	1
10140783	_hypernym	08555333	0
14493426	_derivationally_related_form	02632567	1
02334867	_has_part	01716227	0
09361517	_hypernym	09437454	1
00121645	_also_see	06268784	0
01235258	_derivationally_related_form	01153486	1
13594585	_member_meronym	14455700	0
00852922	_hypernym	00849080	1
01856748	_similar_to	04520480	0
00841628	_derivationally_related_form	01193721	1
04159354	_also_see	10570019	0
01167981	_derivationally_related_form	03200357	1
03694761	_member_of_domain_usage	02111684	0
00619183	_derivationally_related_form	15159819	1
10601526	_instance_hypernym	00651630	0
01854415	_hypernym	01852861	1
04005630	_synset_domain_topic_of	02632353	0
09906848	_hypernym	10474645	1
01135529	_verb_group	08280124	0
13858045	_hypernym	13857486	1
02523275	_verb_group	01940403	0
01845627	_member_meronym	01854047	1
09397391	_has_part	02632567	0
00105778	_derivationally_related_form	00513401	1
03679986	_also_see	03125870	0
01510827	_derivationally_related_form	00409211	1
03872495	_derivationally_related_form	14008806	0
01100145	_derivationally_related_form	10782940	1
00182213	_derivationally_related_form	00506040	0
01639105	_derivationally_related_form	03772269	1
08280124	_has_part	03121897	0
02384686	_derivationally_related_form	07186148	1
07531255	_derivationally_related_form	03624966	0
14436875	_derivationally_related_form	02237631	1
02326695	_similar_to	00589769	0
14429608	_hypernym	14429985	1
10768585	_member_of_domain_usage	04159354	0
01182024	_derivationally_related_form	01197338	1
09892693	_instance_hypernym	04594489	0
00459114	_hypernym	00458754	1
14299637	_synset_domain_topic_of	05525628	0
05645199	_derivationally_related_form	00609100	1
10717921	_member_meronym	01373844	0
10768585	_derivationally_related_form	01093172	1
00366547	_member_of_domain_usage	08555333	0
00609506	_derivationally_related_form	01941093	1
00293916	_also_see	05259240	0
01820302	_derivationally_related_form	10058411	1
15235126	_instance_hypernym	02657219	0
04135315	_hypernym	03872495	1
15164957	_instance_hypernym	01672607	0
00300317	_hypernym	00299580	1
09287968	_instance_hypernym	01647672	0
09622302	_derivationally_related_form	01775535	1
04520480	_synset_domain_topic_of	00450866	0
07238102	_derivationally_related_form	02636921	1
05245775	_has_part	00958823	0
07183151	_derivationally_related_form	00869126	1
00167934	_synset_domain_topic_of	04873550	0
02043982	_derivationally_related_form	08612049	1
08873269	_instance_hypernym	10683126	0
00853633	_derivationally_related_form	06778102	1
10334567	_similar_to	07573103	0
14889479	_derivationally_related_form	00239614	1
03078287	_instance_hypernym	00854150	0
01941093	_derivationally_related_form	10433164	1
01222645	_member_meronym	00450866	0
00043480	_derivationally_related_form	05714466	1
06271778	_also_see	03210683	0
08278324	_hypernym	08276342	1
00666058	_member_of_domain_usage	00417859	0
09861946	_derivationally_related_form	01944692	1
02092309	_synset_domain_topic_of	02332999	0
09747329	_derivationally_related_form	03130073	1
02261464	_member_of_domain_usage	10026553	0
05658603	_derivationally_related_form	02124748	1
10216106	_has_part	07609840	0
00724029	_derivationally_related_form	13421462	1
00622266	_hypernym	05816790	0
01190840	_derivationally_related_form	07891726	1
01216004	_similar_to	02999410	0
02274482	_derivationally_related_form	00085678	1
03216828	_derivationally_related_form	10676018	0
01020117	_similar_to	01017738	1
15228378	_member_of_domain_usage	09759501	0
02174311	_derivationally_related_form	07380144	1
10373998	_hypernym	10024119	0
02464342	_hypernym	02463704	1
00015303	_member_of_domain_usage	07883860	0
07460104	_derivationally_related_form	01914947	1
03057021	_member_meronym	13390857	0
00588473	_derivationally_related_form	09759501	1
10637038	_member_of_domain_usage	08346655	0
00135718	_also_see	01880531	1
10042300	_has_part	01373844	0
02053941	_verb_group	01849746	1
13358549	_similar_to	00620424	0
00550016	_derivationally_related_form	10318892	1
00186634	_has_part	15228162	0
01021579	_derivationally_related_form	00958823	1
04907269	_verb_group	06268784	0
01475282	_also_see	01613463	1
02368336	_derivationally_related_form	10183757	0
00384620	_derivationally_related_form	00261405	1
07643026	_member_meronym	02519991	0
01203676	_derivationally_related_form	02662979	1
06268784	_has_part	13358549	0
13529616	_derivationally_related_form	02672859	1
10217436	_verb_group	09367991	0
05046471	_hypernym	05046009	1
01134522	_synset_domain_topic_of	02746365	0
01387786	_derivationally_related_form	01741562	1
04305323	_member_meronym	03777126	0
00366547	_verb_group	00364868	1
00514871	_similar_to	00658052	0
00858849	_derivationally_related_form	00016380	1
01928838	_similar_to	03624966	0
00076072	_hypernym	00074790	1
01531265	_derivationally_related_form	03764822	0
03199901	_has_part	03905730	1
01570562	_also_see	01743531	0
00231567	_derivationally_related_form	02478059	1
08626522	_has_part	08626522	0
15166462	_has_part	15169421	1
03519578	_hypernym	00620424	0
08654360	_hypernym	08491826	1
02911158	_also_see	02657219	0
13622591	_has_part	13622209	1
07313004	_instance_hypernym	02746365	0
00657550	_derivationally_related_form	00874977	1
03003730	_member_of_domain_usage	13580723	0
00453935	_derivationally_related_form	01140794	1
01177033	_also_see	15259284	0
00754731	_derivationally_related_form	10672192	1
00252710	_synset_domain_topic_of	01854415	0
04665813	_derivationally_related_form	02529284	1
01169067	_has_part	00882961	0
02402409	_derivationally_related_form	00215838	1
04460947	_similar_to	04511002	0
01882170	_derivationally_related_form	04544979	1
03101796	_member_of_domain_usage	00984609	0
00302394	_derivationally_related_form	01941093	1
00265386	_instance_hypernym	01470225	0
14619225	_has_part	09272085	1
01234729	_instance_hypernym	01234729	0
02652494	_derivationally_related_form	10269458	1
09889941	_similar_to	09889941	0
04046810	_derivationally_related_form	01954559	1
03399047	_member_of_domain_usage	03399047	0
01186208	_hypernym	01194418	1
04499660	_also_see	05382729	0
00759694	_derivationally_related_form	10702781	1
03764822	_member_of_domain_usage	00891850	0
00660102	_derivationally_related_form	10506762	1
07751451	_instance_hypernym	13344804	0
15122231	_derivationally_related_form	00490968	1
07450343	_hypernym	14738752	0
08571139	_hypernym	08523483	1
07890068	_synset_domain_topic_of	01118614	0
15166462	_has_part	15169248	1
00683185	_similar_to	10717921	0
04440749	_hypernym	03533972	1
08276342	_also_see	01966861	0
02519991	_derivationally_related_form	13341756	1
05959954	_member_of_domain_usage	01580928	0
07847198	_derivationally_related_form	01418037	1
03479397	_similar_to	00421535	0
01242716	_derivationally_related_form	02512922	1
04460947	_member_meronym	01305361	0
09889941	_hypernym	10744164	1
10712573	_hypernym	02919100	0
02252931	_derivationally_related_form	01120448	1
01781983	_has_part	05091316	0
02566227	_derivationally_related_form	10157744	1
04460947	_instance_hypernym	14408086	0
04157320	_derivationally_related_form	01551871	1
00290579	_similar_to	00657016	0
09334396	_derivationally_related_form	02022359	1
08346655	_derivationally_related_form	08346655	0
01996735	_derivationally_related_form	08428019	1
07512465	_hypernym	01475831	0
10529965	_derivationally_related_form	01957529	1
02094755	_has_part	00657016	0
10769321	_derivationally_related_form	02493260	1
02331175	_synset_domain_topic_of	01716227	0
01940403	_derivationally_related_form	10096217	1
00458754	_member_meronym	13290676	0
00555648	_derivationally_related_form	02055649	1
00622266	_hypernym	00856860	0
06508816	_derivationally_related_form	01001643	1
01177703	_similar_to	02237631	0
03309465	_has_part	04082886	1
04460947	_has_part	13359941	0
00239614	_hypernym	00239321	1
01432601	_instance_hypernym	09612131	0
02005756	_derivationally_related_form	04864515	1
15234764	_hypernym	00026385	0
01782218	_derivationally_related_form	07520612	1
05003090	_verb_group	02363128	0
01223182	_derivationally_related_form	13877918	1
00207728	_member_of_domain_usage	02632567	0
01136614	_derivationally_related_form	03467984	1
00300317	_has_part	06669384	0
02478059	_derivationally_related_form	00231567	1
10454972	_derivationally_related_form	06878071	0
00595146	_derivationally_related_form	10298912	1
01054227	_also_see	02669885	0
00980908	_derivationally_related_form	05960464	1
06254669	_member_of_domain_usage	07890068	0
00365188	_derivationally_related_form	00365471	1
07710007	_has_part	10300154	0
07543288	_derivationally_related_form	01775164	1
02519991	_instance_hypernym	02911158	0
06778102	_derivationally_related_form	00105554	1
03479397	_derivationally_related_form	00470084	0
00891216	_derivationally_related_form	10209731	1
06478582	_member_of_domain_usage	02237631	0
10760340	_derivationally_related_form	02461314	1
07921455	_synset_domain_topic_of	01851996	0
13358549	_hypernym	13384557	1
01169067	_synset_domain_topic_of	02672187	0
00074790	_hypernym	00070965	1
03399047	_member_meronym	00622266	0
00452293	_derivationally_related_form	02003601	1
03513627	_synset_domain_topic_of	00666058	0
02994858	_derivationally_related_form	00329831	1
03130073	_hypernym	02521816	0
15165490	_hypernym	15228378	1
09307300	_has_part	00589769	0
02210119	_verb_group	02236124	1
00458754	_hypernym	01240979	0
00643197	_derivationally_related_form	09790278	1
00356790	_instance_hypernym	05003090	0
02529284	_derivationally_related_form	00066397	1
00889472	_has_part	01242716	0
00264875	_derivationally_related_form	13426238	1
02022359	_synset_domain_topic_of	03764822	0
00754731	_derivationally_related_form	06513366	1
05046009	_instance_hypernym	13292787	0
01219706	_derivationally_related_form	02886599	1
01256157	_similar_to	01684337	0
08587828	_hypernym	08491826	1
03467984	_derivationally_related_form	15165490	0
01765392	_derivationally_related_form	00759551	1
01646528	_member_of_domain_usage	04792127	0
02046755	_derivationally_related_form	07440979	1
15165490	_instance_hypernym	07449862	0
06201136	_derivationally_related_form	10402086	1
05527216	_derivationally_related_form	07752264	0
00882961	_derivationally_related_form	02123672	1
09203827	_instance_hypernym	00026192	0
04660080	_hypernym	05207130	1
00651630	_derivationally_related_form	13459322	0
04879658	_derivationally_related_form	00963283	1
10548227	_has_part	01219993	0
10051975	_derivationally_related_form	00416135	1
00589309	_instance_hypernym	09262690	0
02079525	_derivationally_related_form	05246511	1
03872495	_verb_group	03156405	0
01510827	_derivationally_related_form	07338114	1
00683185	_member_meronym	00537682	0
14889479	_hypernym	14865800	1
03624966	_hypernym	02331175	0
10084635	_derivationally_related_form	00800421	1
10162991	_has_part	01851996	0
09790278	_hypernym	10488016	1
00350461	_member_meronym	01475831	0
07246742	_derivationally_related_form	00807461	1
09287968	_hypernym	05959954	0
00087152	_also_see	01922763	1
02693168	_has_part	01572978	0
07204911	_derivationally_related_form	02473431	1
00849080	_hypernym	00878052	0
10299250	_derivationally_related_form	02592397	1
10676018	_instance_hypernym	13985818	0
07677593	_hypernym	07675627	1
02022359	_instance_hypernym	05382729	0
05714161	_hypernym	05713737	1
04305323	_member_of_domain_usage	09367991	0
10433737	_derivationally_related_form	01180975	1
01887020	_hypernym	13650045	0
00849080	_derivationally_related_form	10561320	1
14299637	_member_meronym	02017937	0
00302394	_derivationally_related_form	01940403	1
10388440	_verb_group	00853776	0
02344243	_hypernym	02344060	1
02261642	_hypernym	00858377	0
00258854	_derivationally_related_form	00199659	1
05525628	_has_part	01985029	0
01960911	_derivationally_related_form	10683126	1
15228162	_verb_group	00140393	0
01912893	_derivationally_related_form	04544979	1
01850035	_member_of_domain_usage	00889831	0
02368336	_also_see	02395115	1
01177033	_derivationally_related_form	04839676	0
02037272	_also_see	01549291	1
01570562	_derivationally_related_form	08556491	0
02738031	_hypernym	04566257	1
01740892	_synset_domain_topic_of	13421832	0
07186148	_derivationally_related_form	01470225	1
01856748	_member_of_domain_usage	09203827	0
00031820	_also_see	00802136	1
07537259	_hypernym	02000868	0
02395115	_also_see	01073822	1
06263369	_similar_to	14299336	0
02583139	_derivationally_related_form	00962129	1
13421832	_hypernym	03150232	0
04465933	_hypernym	03605722	1
09759501	_verb_group	10614363	0
02523275	_derivationally_related_form	05042871	1
00589309	_derivationally_related_form	02519991	0
02657219	_derivationally_related_form	04713428	1
07712382	_hypernym	02463704	0
00070965	_derivationally_related_form	00842538	1
05731568	_instance_hypernym	00596393	0
09759311	_derivationally_related_form	08279298	1
01740892	_hypernym	00815173	0
01522052	_derivationally_related_form	00345641	1
00885925	_also_see	10305802	0
14425974	_derivationally_related_form	01489722	1
01966706	_member_of_domain_usage	00973077	0
15159819	_derivationally_related_form	00619183	1
02632353	_member_meronym	00858849	0
01570562	_hypernym	01387786	1
08382297	_derivationally_related_form	01524871	0
00616857	_derivationally_related_form	10351625	1
02672187	_derivationally_related_form	00182213	0
00739270	_derivationally_related_form	00311663	1
05639651	_verb_group	05639651	0
02274482	_derivationally_related_form	09810364	1
01846331	_hypernym	00700652	0
02418205	_derivationally_related_form	05769471	1
04081281	_instance_hypernym	10515194	0
15170786	_has_part	15171008	1
03057021	_member_meronym	00856860	0
01857632	_derivationally_related_form	01053339	1
05011790	_also_see	10183757	0
09366017	_hypernym	09287968	1
04460947	_hypernym	00810557	0
04842515	_derivationally_related_form	01587077	1
08346655	_member_of_domain_usage	00499066	0
02462580	_verb_group	02461314	1
01850192	_has_part	09274500	0
02389220	_derivationally_related_form	13939353	1
00597957	_member_of_domain_usage	04606574	0
02022486	_derivationally_related_form	09334396	1
10454972	_also_see	10217436	0
04713428	_derivationally_related_form	02657219	1
10413276	_derivationally_related_form	05695806	0
00511212	_hypernym	00510189	1
00388210	_similar_to	02261464	0
09879744	_derivationally_related_form	02566227	1
01117723	_derivationally_related_form	09302616	0
00321486	_derivationally_related_form	03873064	1
05615147	_has_part	04641153	0
00259894	_derivationally_related_form	02250625	1
02958126	_similar_to	02092309	0
02924116	_derivationally_related_form	01949110	1
07071942	_also_see	00658052	0
10002760	_derivationally_related_form	02521410	1
02639606	_instance_hypernym	07234230	0
00135718	_derivationally_related_form	04721650	1
03624966	_instance_hypernym	02911158	0
02055649	_derivationally_related_form	00330160	1
01983771	_member_meronym	00273963	0
01522276	_derivationally_related_form	10781984	1
06877578	_has_part	03065424	0
00922867	_derivationally_related_form	01004582	1
02463141	_member_of_domain_usage	10320863	0
02667900	_hypernym	02657219	1
03764822	_instance_hypernym	15160866	0
08895771	_instance_hypernym	08524735	1
09287968	_hypernym	01135529	0
15137047	_hypernym	15163005	1
01475282	_similar_to	13875970	0
02700104	_verb_group	02657219	1
02332999	_instance_hypernym	03519578	0
03624966	_derivationally_related_form	01671039	1
00874977	_derivationally_related_form	02639606	0
02402409	_hypernym	02405252	1
02332999	_synset_domain_topic_of	13970764	0
