# Supplementary material
Source: ML conference proceedings conference paper supplement (https://proceedings.neurips.cc/paper_files/paper/2021/hash/0fd600c953cde8121262e322ef09f70e-Abstract.html)
Supplement: Supplementary file 1 [file 0fd600c953cde8121262e322ef09f70e-Supplemental.zip › Supplementary_Material_Paper_8745/data/GraIL-BM_WN18RR_v2/test/test-random-sample/test8.txt]

08858942	_has_part	08890097	1
10021892	_hypernym	07442068	0
01725712	_derivationally_related_form	07480896	1
01527271	_hypernym	13970764	0
02542280	_derivationally_related_form	01203676	1
01945381	_member_of_domain_usage	00596393	0
10515194	_derivationally_related_form	05945508	1
08033194	_has_part	02537407	0
01958615	_derivationally_related_form	00299217	1
10285135	_also_see	00070965	0
01398212	_hypernym	14989820	1
05245775	_hypernym	10717921	0
02112891	_hypernym	02112029	1
00815173	_instance_hypernym	00889831	0
04695963	_derivationally_related_form	01537409	1
03823540	_instance_hypernym	02005756	0
02491383	_derivationally_related_form	10526096	1
02331175	_synset_domain_topic_of	02950482	0
10489944	_hypernym	10707233	1
01856748	_hypernym	07575510	0
01856225	_member_meronym	01856553	1
02964389	_instance_hypernym	00885925	0
05748786	_derivationally_related_form	02666882	1
06268784	_derivationally_related_form	10548681	0
00812526	_derivationally_related_form	01572978	1
01216004	_member_of_domain_usage	13421832	0
01949110	_hypernym	01955984	1
01222645	_also_see	00209546	0
02064131	_derivationally_related_form	13774404	1
00143204	_derivationally_related_form	01684337	0
09334396	_derivationally_related_form	01502762	1
13421832	_has_part	05959954	0
09688008	_derivationally_related_form	02957823	1
00589769	_has_part	01475831	0
05715864	_derivationally_related_form	02194495	1
00843468	_also_see	01743531	0
04926427	_hypernym	04924103	1
08626522	_verb_group	00213353	0
14798450	_derivationally_related_form	02627221	1
00843468	_synset_domain_topic_of	07209305	0
01098869	_derivationally_related_form	01156438	1
06263369	_verb_group	01848648	0
01926984	_verb_group	02099829	1
04994413	_synset_domain_topic_of	01232246	0
02964389	_derivationally_related_form	01612084	1
13358549	_similar_to	01672607	0
07635155	_hypernym	07628870	1
00066397	_has_part	10217436	0
13291189	_derivationally_related_form	02543874	1
00273963	_also_see	02669885	0
00753428	_hypernym	00752493	1
10676018	_has_part	07775375	0
01144657	_derivationally_related_form	00452293	1
02893338	_member_meronym	07512465	0
01131043	_also_see	01125429	1
03150232	_instance_hypernym	01041762	0
01073241	_derivationally_related_form	01182293	1
07775375	_instance_hypernym	08504851	0
01074650	_also_see	02530861	1
01475282	_also_see	09892831	0
10488016	_hypernym	10632576	1
10683126	_synset_domain_topic_of	01828736	0
02632567	_derivationally_related_form	14493426	1
08683548	_verb_group	04852750	0
08277805	_derivationally_related_form	09759311	1
01672607	_verb_group	01120448	0
05050379	_hypernym	05050115	1
02092309	_synset_domain_topic_of	04390873	0
00470084	_derivationally_related_form	00233386	1
03626115	_member_meronym	00228535	0
02666943	_derivationally_related_form	01322854	1
07800091	_instance_hypernym	00209546	0
08873622	_has_part	08597023	1
03519981	_member_of_domain_usage	03519981	0
01781983	_derivationally_related_form	14405931	1
00209546	_has_part	00810557	0
00299217	_derivationally_related_form	01958615	1
00973077	_member_of_domain_usage	05177285	0
06220616	_hypernym	06212839	1
00651630	_member_meronym	05525628	0
01904293	_derivationally_related_form	09281777	1
02657219	_instance_hypernym	00595146	0
00481739	_derivationally_related_form	06667317	1
02334867	_member_of_domain_usage	08555333	0
01182293	_derivationally_related_form	04638585	1
09957156	_has_part	01073822	0
02046755	_derivationally_related_form	13878112	1
01855672	_member_of_domain_usage	02368336	0
07813107	_derivationally_related_form	00213353	1
07577772	_verb_group	02003601	0
00467717	_derivationally_related_form	05924920	1
14299336	_member_meronym	09612131	0
09759311	_derivationally_related_form	02669885	1
05198036	_member_meronym	01848648	0
00409211	_derivationally_related_form	02443849	1
07710616	_instance_hypernym	14034177	0
01775535	_hypernym	01775164	1
13939353	_also_see	13358549	0
10672662	_derivationally_related_form	05186306	1
01849746	_has_part	14779550	0
05707146	_derivationally_related_form	00614999	1
02523275	_hypernym	05046009	0
02519991	_derivationally_related_form	00259643	1
02111684	_instance_hypernym	04081281	0
01845627	_member_meronym	01855672	1
07313004	_similar_to	00810557	0
01390616	_derivationally_related_form	00113113	1
04520480	_derivationally_related_form	07711471	0
14299070	_derivationally_related_form	00091124	1
01614079	_has_part	04081281	0
01955508	_derivationally_related_form	00121645	1
10408324	_instance_hypernym	06268784	0
01389329	_derivationally_related_form	00616083	1
00366547	_member_meronym	00891850	0
00596393	_derivationally_related_form	10464542	1
04339291	_verb_group	06669384	0
00601822	_derivationally_related_form	00180770	1
03003730	_member_of_domain_usage	02965300	0
02530861	_also_see	00853776	1
01950502	_synset_domain_topic_of	05245775	0
00560893	_derivationally_related_form	00358931	1
00443231	_instance_hypernym	07575510	0
01856748	_hypernym	01507175	1
00985921	_hypernym	00295697	0
08877208	_instance_hypernym	08633957	1
04005630	_synset_domain_topic_of	02632353	0
06682794	_derivationally_related_form	01955127	1
10548681	_member_meronym	00616083	0
13855627	_derivationally_related_form	00661213	1
04460947	_has_part	04339291	0
00838367	_derivationally_related_form	01179865	1
04499660	_derivationally_related_form	00589769	0
03150232	_derivationally_related_form	01522276	1
14299637	_member_meronym	04730580	0
01073822	_derivationally_related_form	04993413	1
00682436	_also_see	00682436	0
01944692	_derivationally_related_form	02858304	1
00463469	_also_see	02398463	0
00350889	_hypernym	00350461	1
01064758	_instance_hypernym	01983771	0
02478059	_derivationally_related_form	14455700	1
10601526	_also_see	04191595	0
07238102	_derivationally_related_form	02677332	1
06510977	_derivationally_related_form	00433458	0
09424489	_derivationally_related_form	01816431	1
02098458	_derivationally_related_form	01725712	0
02887209	_hypernym	04336034	1
02599004	_hypernym	03216828	0
13580723	_derivationally_related_form	01193721	1
00293916	_member_meronym	13757724	0
10093658	_derivationally_related_form	01140794	1
08556491	_synset_domain_topic_of	04993882	0
00330160	_derivationally_related_form	00438178	1
00421535	_derivationally_related_form	09942871	0
13552270	_derivationally_related_form	00239614	1
01547001	_verb_group	00874977	0
01224744	_verb_group	00597385	1
03863262	_derivationally_related_form	00589309	0
05219724	_has_part	05514905	1
02519991	_instance_hypernym	00658052	0
01354006	_derivationally_related_form	14705718	1
01850035	_derivationally_related_form	04994413	0
01234345	_derivationally_related_form	00421535	1
09893015	_hypernym	08556491	0
04576211	_has_part	04574999	1
06263369	_has_part	08873269	0
02270165	_derivationally_related_form	10330189	1
01179865	_instance_hypernym	01179865	0
00044673	_derivationally_related_form	00417001	1
10024119	_instance_hypernym	07573103	0
02250625	_derivationally_related_form	13282550	1
03697109	_synset_domain_topic_of	02706816	0
00891216	_derivationally_related_form	13344804	1
13939353	_synset_domain_topic_of	04928416	0
00182213	_derivationally_related_form	02461314	1
02001461	_derivationally_related_form	00962634	0
14622893	_has_part	14619225	1
02519991	_verb_group	00212049	0
05238282	_has_part	05244934	1
10280945	_synset_domain_topic_of	10637038	0
05174653	_derivationally_related_form	02519991	1
05695806	_instance_hypernym	00143204	0
13282550	_derivationally_related_form	02519991	1
00015303	_member_meronym	01828736	0
03933529	_derivationally_related_form	02085742	1
02028722	_instance_hypernym	14008806	0
00366547	_derivationally_related_form	00357680	1
02672187	_derivationally_related_form	10142747	0
02519991	_derivationally_related_form	13290676	1
00880227	_verb_group	13282007	0
01493897	_derivationally_related_form	14425974	1
07310507	_verb_group	00511041	0
04828255	_derivationally_related_form	01782519	1
00882961	_hypernym	04594489	0
08277805	_hypernym	08276720	1
01614079	_also_see	10087736	0
01406356	_verb_group	01406512	1
06216160	_member_meronym	00365471	0
01487311	_hypernym	01488956	1
02190166	_verb_group	07884567	0
04980656	_derivationally_related_form	01053144	1
13278375	_similar_to	03130073	0
15129927	_hypernym	05816790	1
08891889	_verb_group	00889831	0
01537409	_derivationally_related_form	05244934	1
05816790	_also_see	06882561	0
02531422	_also_see	00856860	1
08168117	_verb_group	07622261	0
05003090	_derivationally_related_form	01882170	1
10320863	_verb_group	01954559	0
02125641	_derivationally_related_form	05714466	1
02332999	_instance_hypernym	10160412	0
00113113	_derivationally_related_form	01754105	1
04460947	_synset_domain_topic_of	03125870	0
00695523	_also_see	01475282	1
00984609	_has_part	00388210	0
00658052	_derivationally_related_form	01009871	1
03519981	_similar_to	01954559	0
06561942	_derivationally_related_form	00844298	1
00849080	_also_see	02834778	0
02235666	_verb_group	02537407	1
03679986	_member_of_domain_usage	04460947	0
13874073	_derivationally_related_form	00417001	1
07847453	_member_meronym	04792127	0
14971519	_derivationally_related_form	00238867	1
10021892	_similar_to	06596179	0
02291708	_synset_domain_topic_of	13333237	1
00350461	_instance_hypernym	04499660	0
01150467	_hypernym	01150200	1
02017937	_similar_to	01072072	0
13282550	_derivationally_related_form	02253456	1
00418615	_member_of_domain_usage	07449862	0
13720096	_hypernym	13716084	1
15228378	_has_part	08504851	0
01167780	_derivationally_related_form	03200357	1
02519991	_hypernym	15164957	0
01475282	_also_see	02451951	1
10320863	_verb_group	01854415	0
10330189	_derivationally_related_form	02269894	1
00239321	_synset_domain_topic_of	07722217	0
08612049	_has_part	08495617	1
00505802	_member_meronym	07531255	0
00105778	_derivationally_related_form	09930876	1
07710007	_derivationally_related_form	00815173	0
10478960	_derivationally_related_form	02163301	1
09307300	_member_of_domain_usage	04792127	0
00842989	_derivationally_related_form	09762385	1
02329883	_member_meronym	02112891	0
01097031	_derivationally_related_form	08397255	1
00182213	_member_meronym	14299070	0
00657728	_derivationally_related_form	00874977	1
09759501	_member_of_domain_usage	01232246	0
02196690	_derivationally_related_form	14599641	1
01235258	_derivationally_related_form	01475282	0
01684337	_derivationally_related_form	00937656	1
15234764	_hypernym	05658603	0
00980908	_derivationally_related_form	06790042	1
00026192	_hypernym	07896994	0
00658052	_derivationally_related_form	06483454	1
01848648	_synset_domain_topic_of	03156405	0
05659365	_hypernym	05659621	1
00463778	_member_of_domain_usage	05382729	0
01074650	_derivationally_related_form	10112591	1
09281777	_member_meronym	10217436	0
02072501	_derivationally_related_form	13649791	1
00815801	_similar_to	01177033	0
01227137	_also_see	01370590	1
03764822	_has_part	01781983	0
00800930	_hypernym	00685683	1
02368336	_instance_hypernym	03125870	0
02250625	_derivationally_related_form	00259894	1
05638778	_member_meronym	01849746	0
13573666	_hypernym	13575433	1
15228378	_verb_group	10069645	0
07551052	_derivationally_related_form	00859604	1
01940403	_has_part	01574292	0
05527216	_has_part	05525628	1
10142747	_hypernym	08876773	0
00590148	_derivationally_related_form	09906986	1
07889814	_hypernym	00014742	0
09334396	_derivationally_related_form	01292727	1
04242704	_member_of_domain_usage	02547225	0
00859604	_derivationally_related_form	01073241	1
01135529	_verb_group	02326198	0
00843468	_derivationally_related_form	06730780	1
00622266	_has_part	00384620	0
09203827	_member_meronym	09316454	1
06669384	_has_part	00537682	0
00239614	_verb_group	00238867	1
00658052	_instance_hypernym	00083975	0
01958615	_synset_domain_topic_of	00450335	1
09957156	_similar_to	07288639	0
02700104	_derivationally_related_form	00552841	1
00651630	_member_of_domain_usage	06201136	0
01960911	_derivationally_related_form	00442115	1
01064148	_also_see	07896994	0
04236001	_hypernym	03895866	1
01853072	_hypernym	09892831	0
06685456	_derivationally_related_form	00890100	1
08167365	_member_of_domain_usage	10717921	0
00365188	_verb_group	00365647	1
04081281	_verb_group	00443231	0
07450343	_hypernym	07447641	1
02402409	_synset_domain_topic_of	14426449	0
08871007	_has_part	08877208	1
14427239	_synset_domain_topic_of	00295697	0
00622584	_derivationally_related_form	01143838	1
01063695	_member_of_domain_usage	14455700	0
06767777	_derivationally_related_form	01058880	1
01118614	_has_part	05826914	0
01820302	_derivationally_related_form	07491981	1
00506040	_derivationally_related_form	03883664	0
10293332	_derivationally_related_form	01924505	1
00300317	_hypernym	06624161	0
09759311	_derivationally_related_form	08280124	1
14408086	_member_of_domain_usage	00853776	0
02080577	_derivationally_related_form	02671880	1
01858910	_synset_domain_topic_of	13939353	0
00622266	_derivationally_related_form	01574292	1
07944050	_instance_hypernym	03121897	0
04493505	_derivationally_related_form	02079525	1
03679986	_has_part	03096960	0
03216828	_derivationally_related_form	01305731	1
04827652	_has_part	05527848	0
00657550	_derivationally_related_form	05737153	1
10280130	_has_part	02334867	0
13969243	_derivationally_related_form	02700104	1
02331175	_verb_group	13459322	0
09612291	_derivationally_related_form	00869596	1
02192992	_member_meronym	01981279	0
01526956	_derivationally_related_form	03872495	1
07573103	_similar_to	08036849	0
02672540	_derivationally_related_form	00259643	1
04907269	_similar_to	00616083	0
02058794	_also_see	02523275	1
10722965	_derivationally_related_form	02463704	0
05524615	_hypernym	05525252	1
00889472	_instance_hypernym	00589309	0
05014099	_derivationally_related_form	00328128	1
07071942	_also_see	00724029	0
02191766	_derivationally_related_form	05715864	1
01182293	_instance_hypernym	01957529	0
00812274	_derivationally_related_form	01216004	1
07537259	_also_see	07512465	0
10298912	_derivationally_related_form	00595146	1
00658052	_member_meronym	02725067	0
01216522	_derivationally_related_form	00812526	1
02112891	_similar_to	05011790	0
00299580	_derivationally_related_form	05755486	1
04713692	_similar_to	06685456	0
00085678	_derivationally_related_form	02274482	1
00066397	_derivationally_related_form	08504851	0
01547641	_verb_group	01547390	1
14374432	_instance_hypernym	00433458	0
15183428	_hypernym	15157225	1
09942871	_member_of_domain_usage	00366547	0
06200010	_derivationally_related_form	00350461	1
01120448	_similar_to	08033194	0
01027263	_derivationally_related_form	04659090	1
03467984	_verb_group	02331175	0
02085742	_derivationally_related_form	10655169	1
06715786	_hypernym	05706629	0
01158690	_derivationally_related_form	00467717	1
05524243	_synset_domain_topic_of	03764822	0
00851933	_derivationally_related_form	01224517	1
00985921	_derivationally_related_form	01549291	0
00259643	_derivationally_related_form	02519991	1
01041762	_similar_to	10535706	0
09826204	_derivationally_related_form	01941093	1
09957156	_member_of_domain_usage	07204911	0
13876371	_derivationally_related_form	02738544	1
13594585	_synset_domain_topic_of	02112891	0
02120458	_derivationally_related_form	00513401	1
01222666	_also_see	01848648	0
01524298	_hypernym	01524871	1
02003601	_member_meronym	02676496	0
02653996	_derivationally_related_form	02945161	1
01510827	_derivationally_related_form	10683126	0
10058411	_derivationally_related_form	01820302	1
09307300	_member_of_domain_usage	10614363	0
02834778	_has_part	04289690	1
00810557	_similar_to	09203827	0
02446164	_derivationally_related_form	00583461	1
06596179	_similar_to	06960298	0
00015303	_derivationally_related_form	00858849	1
13358549	_derivationally_related_form	07313004	0
00842989	_derivationally_related_form	07234230	1
00854150	_instance_hypernym	13325010	0
00320486	_derivationally_related_form	02001858	1
08392137	_similar_to	03130073	0
00963241	_hypernym	00962129	1
05091316	_derivationally_related_form	10160412	0
00356790	_derivationally_related_form	01387786	1
05259240	_instance_hypernym	05706629	0
14585519	_derivationally_related_form	00330144	1
00252710	_verb_group	00597957	0
01354405	_derivationally_related_form	04049405	1
00014405	_synset_domain_topic_of	02957823	0
15145586	_has_part	15146545	1
00366547	_verb_group	13296899	0
02163301	_derivationally_related_form	01135529	1
10515194	_synset_domain_topic_of	05043973	0
04854389	_hypernym	04827652	1
01856225	_member_of_domain_usage	01135529	0
01385920	_derivationally_related_form	09307300	1
06685456	_hypernym	10676018	0
00937656	_derivationally_related_form	01551871	1
00492677	_has_part	00683185	0
02326695	_also_see	02451951	1
01489989	_has_part	00239321	0
13279262	_hypernym	13281275	1
08402828	_has_part	00953923	0
01179865	_derivationally_related_form	07800091	1
05003090	_member_meronym	01073822	0
13875970	_derivationally_related_form	00143204	1
01983771	_hypernym	10782791	0
01940403	_derivationally_related_form	00302394	1
00418615	_also_see	01118614	0
00061290	_derivationally_related_form	01955127	1
14405931	_member_meronym	15228162	0
01951276	_derivationally_related_form	13326198	1
01549291	_instance_hypernym	01053339	0
00467717	_derivationally_related_form	13617952	1
00252710	_verb_group	13867276	0
02632567	_hypernym	02632353	1
06715786	_instance_hypernym	13617952	0
00963283	_derivationally_related_form	00963241	1
00431005	_hypernym	01086945	0
01432601	_derivationally_related_form	10395073	1
13384877	_member_of_domain_usage	05198036	0
01193099	_hypernym	01166351	1
05658603	_member_of_domain_usage	10164747	0
01961691	_synset_domain_topic_of	00441824	1
05040275	_hypernym	05959954	0
00443231	_hypernym	00442115	1
01899360	_similar_to	02202133	0
13649791	_hypernym	13603305	1
01035199	_member_of_domain_usage	03393017	0
05058140	_derivationally_related_form	00438178	1
10042300	_synset_domain_topic_of	00815173	0
01273263	_derivationally_related_form	02784732	1
08167365	_derivationally_related_form	00300317	0
01131043	_also_see	02037272	1
01672607	_verb_group	00856860	0
00136800	_derivationally_related_form	13446197	1
01957529	_has_part	06700030	0
01510827	_derivationally_related_form	14008806	1
14374432	_derivationally_related_form	02876088	0
00683185	_also_see	01880531	1
06777687	_has_part	10515194	0
00073828	_hypernym	00070965	1
01955984	_also_see	02519991	0
01640850	_also_see	00666058	1
14429608	_similar_to	00252710	0
00658052	_derivationally_related_form	14429608	1
08167779	_has_part	02669885	0
04565375	_derivationally_related_form	01087197	1
01549291	_derivationally_related_form	04730580	0
02123672	_derivationally_related_form	05713737	1
06700030	_member_of_domain_usage	00812977	0
04046810	_hypernym	04048568	1
03624966	_synset_domain_topic_of	00140393	0
01958615	_synset_domain_topic_of	00299217	1
13290676	_hypernym	13290676	0
07480068	_hypernym	00026192	1
03420559	_member_of_domain_usage	09274500	0
03933529	_derivationally_related_form	01305731	1
02022359	_synset_domain_topic_of	04792127	0
08894456	_has_part	08895928	1
08873269	_instance_hypernym	08873269	0
01193099	_derivationally_related_form	01073655	1
15228378	_derivationally_related_form	00882961	0
02261464	_derivationally_related_form	08069878	1
08285896	_similar_to	00358089	0
01073655	_hypernym	01073241	1
14408086	_also_see	01966706	0
01535709	_also_see	01640850	1
02880940	_derivationally_related_form	06699225	0
00854000	_derivationally_related_form	01226600	1
02210119	_member_of_domain_usage	07313004	0
03000447	_derivationally_related_form	13575433	1
02001461	_derivationally_related_form	05198036	0
10527334	_hypernym	10503452	1
08617963	_hypernym	14426449	0
01840238	_derivationally_related_form	10096217	1
10280130	_synset_domain_topic_of	03248958	0
00890100	_derivationally_related_form	06685456	1
02999410	_similar_to	06882561	0
13282007	_derivationally_related_form	02249741	1
03679986	_has_part	02957823	0
00014742	_derivationally_related_form	15273626	1
00070965	_similar_to	01646528	0
14798450	_hypernym	15010703	1
02965300	_instance_hypernym	00451866	0
00208943	_derivationally_related_form	02405252	1
02880940	_member_meronym	02191766	0
02667228	_hypernym	02666882	1
13422061	_member_of_domain_usage	02202133	0
02332999	_derivationally_related_form	07556637	1
05816622	_instance_hypernym	06700030	0
01100145	_derivationally_related_form	10782791	1
05074374	_has_part	03150232	0
14493426	_derivationally_related_form	02632567	1
03467984	_derivationally_related_form	01716227	0
09361517	_hypernym	09437454	1
06780882	_synset_domain_topic_of	01646528	0
01235258	_derivationally_related_form	01153486	1
13422061	_derivationally_related_form	02191766	0
00852922	_hypernym	00849080	1
05091316	_has_part	00596393	0
00841628	_derivationally_related_form	01193721	1
07573103	_derivationally_related_form	00388210	0
01167981	_derivationally_related_form	03200357	1
08683548	_derivationally_related_form	04852750	0
00619183	_derivationally_related_form	15159819	1
15164957	_hypernym	02632353	0
01854415	_hypernym	01852861	1
02254258	_instance_hypernym	05382729	0
09906848	_hypernym	10474645	1
02401809	_derivationally_related_form	03777126	0
13858045	_hypernym	13857486	1
15165490	_hypernym	09889941	0
01845627	_member_meronym	01854047	1
13398241	_also_see	00962634	0
00105778	_derivationally_related_form	00513401	1
10285135	_derivationally_related_form	06510977	0
01510827	_derivationally_related_form	00409211	1
08346655	_member_meronym	10702615	0
01100145	_derivationally_related_form	10782940	1
15163797	_hypernym	13278375	0
01639105	_derivationally_related_form	03772269	1
10529965	_also_see	13345286	0
02384686	_derivationally_related_form	07186148	1
03823540	_similar_to	14865800	0
14436875	_derivationally_related_form	02237631	1
02363128	_similar_to	04381994	0
14429608	_hypernym	14429985	1
13985818	_verb_group	03519981	0
01182024	_derivationally_related_form	01197338	1
00682436	_verb_group	15170504	0
00459114	_hypernym	00458754	1
02984061	_has_part	08549733	0
05645199	_derivationally_related_form	00609100	1
00958823	_member_of_domain_usage	05198036	0
10768585	_derivationally_related_form	01093172	1
01064758	_also_see	08153874	0
00609506	_derivationally_related_form	01941093	1
02677332	_member_meronym	07204401	0
01820302	_derivationally_related_form	10058411	1
02911158	_synset_domain_topic_of	05046009	0
04135315	_hypernym	03872495	1
00683185	_instance_hypernym	07883860	0
00300317	_hypernym	00299580	1
08875547	_synset_domain_topic_of	00889831	0
09622302	_derivationally_related_form	01775535	1
00358089	_member_meronym	03823540	0
07238102	_derivationally_related_form	02636921	1
02463141	_similar_to	13421832	0
07183151	_derivationally_related_form	00869126	1
13766896	_instance_hypernym	00015303	0
02043982	_derivationally_related_form	08612049	1
02401809	_has_part	00889831	0
00853633	_derivationally_related_form	06778102	1
03519981	_member_of_domain_usage	02334867	0
14889479	_derivationally_related_form	00239614	1
01850192	_also_see	14405931	0
01941093	_derivationally_related_form	10433164	1
02994858	_instance_hypernym	02566227	0
00043480	_derivationally_related_form	05714466	1
00066397	_verb_group	02546467	0
08278324	_hypernym	08276342	1
02994858	_synset_domain_topic_of	01067512	0
09861946	_derivationally_related_form	01944692	1
02402409	_member_of_domain_usage	15165490	0
09747329	_derivationally_related_form	03130073	1
08346655	_member_of_domain_usage	10280945	0
05658603	_derivationally_related_form	02124748	1
05959954	_instance_hypernym	02111684	0
00724029	_derivationally_related_form	13421462	1
03502509	_instance_hypernym	06777687	0
01190840	_derivationally_related_form	07891726	1
01855672	_hypernym	04907269	0
02274482	_derivationally_related_form	00085678	1
10712573	_has_part	01035199	0
01020117	_similar_to	01017738	1
00984609	_verb_group	07442068	0
02174311	_derivationally_related_form	07380144	1
10077593	_member_of_domain_usage	10181990	0
02464342	_hypernym	02463704	1
09893015	_similar_to	07449862	0
07460104	_derivationally_related_form	01914947	1
10676018	_instance_hypernym	03216828	0
00588473	_derivationally_related_form	09759501	1
07883860	_synset_domain_topic_of	08873269	0
00135718	_also_see	01880531	1
02669885	_member_of_domain_usage	01542252	0
02053941	_verb_group	01849746	1
10529965	_similar_to	04993413	0
00550016	_derivationally_related_form	10318892	1
10717921	_verb_group	00182213	0
01021579	_derivationally_related_form	00958823	1
01574292	_synset_domain_topic_of	10373998	0
01475282	_also_see	01613463	1
03046257	_synset_domain_topic_of	00228535	0
00384620	_derivationally_related_form	00261405	1
07775375	_instance_hypernym	10320863	0
01203676	_derivationally_related_form	02662979	1
06882561	_verb_group	08524735	0
13529616	_derivationally_related_form	02672859	1
02693168	_synset_domain_topic_of	00550242	0
05046471	_hypernym	05046009	1
03130073	_member_of_domain_usage	01073822	0
01387786	_derivationally_related_form	01741562	1
01966861	_member_meronym	05382729	0
00366547	_verb_group	00364868	1
08285896	_member_of_domain_usage	01887020	0
00858849	_derivationally_related_form	00016380	1
01854415	_member_of_domain_usage	02669885	0
00076072	_hypernym	00074790	1
01232246	_member_of_domain_usage	01232246	0
03199901	_has_part	03905730	1
03872495	_member_of_domain_usage	09612131	0
00231567	_derivationally_related_form	02478059	1
13766896	_member_meronym	07883860	0
15166462	_has_part	15169421	1
08402828	_hypernym	07752264	0
08654360	_hypernym	08491826	1
10117511	_has_part	01097031	0
13622591	_has_part	13622209	1
01672607	_derivationally_related_form	09262690	0
00657550	_derivationally_related_form	00874977	1
09274500	_has_part	03003344	0
00453935	_derivationally_related_form	01140794	1
00458754	_has_part	09262690	0
00754731	_derivationally_related_form	10672192	1
06904171	_has_part	06263369	0
04665813	_derivationally_related_form	02529284	1
07751451	_derivationally_related_form	03999992	0
02402409	_derivationally_related_form	00215838	1
10644598	_hypernym	08285896	0
01882170	_derivationally_related_form	04544979	1
08549733	_synset_domain_topic_of	00810729	0
00302394	_derivationally_related_form	01941093	1
07450343	_also_see	03078287	0
14619225	_has_part	09272085	1
13875571	_instance_hypernym	15228378	0
02652494	_derivationally_related_form	10269458	1
03999992	_instance_hypernym	09609561	0
04046810	_derivationally_related_form	01954559	1
07961270	_synset_domain_topic_of	01981279	0
01186208	_hypernym	01194418	1
00651630	_hypernym	10676018	0
00759694	_derivationally_related_form	10702781	1
13875970	_instance_hypernym	10024119	0
00660102	_derivationally_related_form	10506762	1
01924505	_member_of_domain_usage	02125641	0
15122231	_derivationally_related_form	00490968	1
10717921	_instance_hypernym	05243879	0
08571139	_hypernym	08523483	1
00858377	_hypernym	10637038	0
15166462	_has_part	15169248	1
07512465	_derivationally_related_form	10261388	0
04440749	_hypernym	03533972	1
02672187	_verb_group	10216106	0
02519991	_derivationally_related_form	13341756	1
01547001	_hypernym	00140393	0
07847198	_derivationally_related_form	01418037	1
01219993	_member_meronym	00595146	0
01242716	_derivationally_related_form	02512922	1
10300154	_similar_to	04995211	0
09889941	_hypernym	10744164	1
10017422	_member_of_domain_usage	05734381	0
02252931	_derivationally_related_form	01120448	1
01985029	_member_of_domain_usage	13377268	0
02566227	_derivationally_related_form	10157744	1
00121645	_derivationally_related_form	00984609	0
04157320	_derivationally_related_form	01551871	1
04339291	_verb_group	00463469	0
09334396	_derivationally_related_form	02022359	1
02329883	_similar_to	03624966	0
01996735	_derivationally_related_form	08428019	1
05257737	_member_of_domain_usage	07710616	0
10529965	_derivationally_related_form	01957529	1
13292787	_member_of_domain_usage	15259284	0
10769321	_derivationally_related_form	02493260	1
04993882	_has_part	00882961	0
01940403	_derivationally_related_form	10096217	1
10184822	_similar_to	05526175	0
00555648	_derivationally_related_form	02055649	1
05046009	_has_part	03624966	0
06508816	_derivationally_related_form	01001643	1
13292787	_instance_hypernym	01003729	0
03309465	_has_part	04082886	1
01475282	_similar_to	00233386	0
00239614	_hypernym	00239321	1
04594489	_member_of_domain_usage	07537259	0
02005756	_derivationally_related_form	04864515	1
06698252	_instance_hypernym	10285135	0
01782218	_derivationally_related_form	07520612	1
01179865	_member_meronym	02994858	0
01223182	_derivationally_related_form	13877918	1
13298935	_derivationally_related_form	08543081	0
01136614	_derivationally_related_form	03467984	1
00889831	_member_meronym	10793168	0
02478059	_derivationally_related_form	00231567	1
02746365	_instance_hypernym	10562968	0
00595146	_derivationally_related_form	10298912	1
03900509	_also_see	00351406	0
00980908	_derivationally_related_form	05960464	1
01855476	_derivationally_related_form	02984061	0
00365188	_derivationally_related_form	00365471	1
06276902	_member_meronym	14374432	0
07543288	_derivationally_related_form	01775164	1
00143204	_verb_group	00143204	0
06778102	_derivationally_related_form	00105554	1
05960464	_also_see	13875571	0
00891216	_derivationally_related_form	10209731	1
00657016	_instance_hypernym	02126022	0
10760340	_derivationally_related_form	02461314	1
04336034	_also_see	13290676	0
13358549	_hypernym	13384557	1
13594585	_derivationally_related_form	10676018	0
00074790	_hypernym	00070965	1
10183757	_has_part	01063695	0
00452293	_derivationally_related_form	02003601	1
07722485	_similar_to	13421832	0
02994858	_derivationally_related_form	00329831	1
14426449	_similar_to	10209731	0
15165490	_hypernym	15228378	1
03457686	_verb_group	14865800	0
02210119	_verb_group	02236124	1
04005630	_similar_to	02326198	0
00643197	_derivationally_related_form	09790278	1
00889831	_hypernym	03075768	0
02529284	_derivationally_related_form	00066397	1
14299336	_derivationally_related_form	13720096	0
00264875	_derivationally_related_form	13426238	1
05006898	_has_part	04595855	0
00754731	_derivationally_related_form	06513366	1
00506040	_member_meronym	10069645	0
01219706	_derivationally_related_form	02886599	1
01167981	_has_part	06596179	0
08587828	_hypernym	08491826	1
04839676	_similar_to	00513401	0
01765392	_derivationally_related_form	00759551	1
01945381	_instance_hypernym	02632353	0
02046755	_derivationally_related_form	07440979	1
07071942	_also_see	02537407	0
06201136	_derivationally_related_form	10402086	1
02911158	_synset_domain_topic_of	00458754	0
00882961	_derivationally_related_form	02123672	1
03883664	_instance_hypernym	00700652	0
04660080	_hypernym	05207130	1
00538876	_synset_domain_topic_of	13875970	0
04879658	_derivationally_related_form	00963283	1
15228162	_synset_domain_topic_of	01887020	0
10051975	_derivationally_related_form	00416135	1
10413276	_member_meronym	00772813	0
02079525	_derivationally_related_form	05246511	1
05259240	_verb_group	05706629	0
01510827	_derivationally_related_form	07338114	1
05243879	_hypernym	03872495	0
14889479	_hypernym	14865800	1
07204401	_hypernym	00874977	0
10084635	_derivationally_related_form	00800421	1
08871007	_synset_domain_topic_of	08311933	0
09790278	_hypernym	10488016	1
02368336	_verb_group	00973077	0
07246742	_derivationally_related_form	00807461	1
08392137	_derivationally_related_form	00450866	0
00087152	_also_see	01922763	1
01906823	_derivationally_related_form	02329883	0
07204911	_derivationally_related_form	02473431	1
01850192	_hypernym	03121897	0
10299250	_derivationally_related_form	02592397	1
09942871	_synset_domain_topic_of	00358089	0
07677593	_hypernym	07675627	1
07310507	_verb_group	01489989	0
05714161	_hypernym	05713737	1
15259284	_synset_domain_topic_of	07710007	0
10433737	_derivationally_related_form	01180975	1
02094755	_member_of_domain_usage	03764822	0
00849080	_derivationally_related_form	10561320	1
07751451	_similar_to	10644598	0
00302394	_derivationally_related_form	01940403	1
03519578	_member_of_domain_usage	03904183	0
02344243	_hypernym	02344060	1
13970764	_similar_to	03003344	0
00258854	_derivationally_related_form	00199659	1
05615147	_has_part	08033194	0
01960911	_derivationally_related_form	10683126	1
00492677	_similar_to	03393017	0
01912893	_derivationally_related_form	04544979	1
06478582	_hypernym	02001461	0
02368336	_also_see	02395115	1
05681117	_derivationally_related_form	05816790	0
02037272	_also_see	01549291	1
01848976	_instance_hypernym	07432973	0
02738031	_hypernym	04566257	1
06878071	_synset_domain_topic_of	10181990	0
07186148	_derivationally_related_form	01470225	1
05177285	_has_part	00026192	0
00031820	_also_see	00802136	1
00550016	_synset_domain_topic_of	01354405	0
02395115	_also_see	01073822	1
00550016	_hypernym	02001461	0
02583139	_derivationally_related_form	00962129	1
00167934	_has_part	01072072	0
04465933	_hypernym	03605722	1
01242716	_synset_domain_topic_of	02537407	0
02523275	_derivationally_related_form	05042871	1
00538876	_also_see	08311933	0
02657219	_derivationally_related_form	04713428	1
00083975	_verb_group	15235126	0
00070965	_derivationally_related_form	00842538	1
10280945	_member_meronym	06698252	0
09759311	_derivationally_related_form	08279298	1
09957156	_derivationally_related_form	00143204	0
01522052	_derivationally_related_form	00345641	1
01848648	_member_of_domain_usage	01765392	0
14425974	_derivationally_related_form	01489722	1
05005250	_member_of_domain_usage	00856860	0
15159819	_derivationally_related_form	00619183	1
08549733	_member_of_domain_usage	01966861	0
01570562	_hypernym	01387786	1
00962634	_member_meronym	00265386	0
00616857	_derivationally_related_form	10351625	1
02210119	_has_part	00356790	0
00739270	_derivationally_related_form	00311663	1
02632567	_derivationally_related_form	13650045	0
02274482	_derivationally_related_form	09810364	1
04008947	_member_of_domain_usage	03399047	0
02418205	_derivationally_related_form	05769471	1
00589769	_verb_group	09302616	0
15170786	_has_part	15171008	1
08879197	_member_meronym	01855672	0
01857632	_derivationally_related_form	01053339	1
10087736	_hypernym	06669384	0
09366017	_hypernym	09287968	1
04873550	_member_of_domain_usage	10683126	0
04842515	_derivationally_related_form	01587077	1
13292787	_synset_domain_topic_of	02250625	0
02462580	_verb_group	02461314	1
03191776	_similar_to	10408324	0
02389220	_derivationally_related_form	13939353	1
01099436	_synset_domain_topic_of	04463679	0
02022486	_derivationally_related_form	09334396	1
09437454	_synset_domain_topic_of	00651630	0
04713428	_derivationally_related_form	02657219	1
02677332	_has_part	02326198	0
00511212	_hypernym	00510189	1
08626522	_verb_group	01234729	0
09879744	_derivationally_related_form	02566227	1
04008947	_has_part	10529965	0
00321486	_derivationally_related_form	03873064	1
00620424	_derivationally_related_form	04595855	0
00259894	_derivationally_related_form	02250625	1
02098458	_has_part	10388440	0
02924116	_derivationally_related_form	01949110	1
10702615	_also_see	13319726	0
10002760	_derivationally_related_form	02521410	1
01097031	_verb_group	10217436	0
00135718	_derivationally_related_form	04721650	1
01015104	_verb_group	13969700	0
02055649	_derivationally_related_form	00330160	1
03469493	_hypernym	02919100	0
01522276	_derivationally_related_form	10781984	1
03863262	_hypernym	01182293	0
00922867	_derivationally_related_form	01004582	1
04008947	_similar_to	01855476	0
02667900	_hypernym	02657219	1
00418615	_derivationally_related_form	03274561	0
08895771	_instance_hypernym	08524735	1
03046257	_similar_to	01118614	0
15137047	_hypernym	15163005	1
00325785	_member_meronym	00593108	0
02700104	_verb_group	02657219	1
00550242	_verb_group	04257986	0
03624966	_derivationally_related_form	01671039	1
10069645	_has_part	10181990	0
02402409	_hypernym	02405252	1
09886010	_derivationally_related_form	07071942	0
