# Supplementary material
Source: ML conference proceedings conference paper supplement (https://proceedings.neurips.cc/paper_files/paper/2021/hash/0fd600c953cde8121262e322ef09f70e-Abstract.html)
Supplement: Supplementary file 1 [file 0fd600c953cde8121262e322ef09f70e-Supplemental.zip › Supplementary_Material_Paper_8745/data/GraIL-BM_WN18RR_v2/test/test-random-sample/test9.txt]

08858942	_has_part	08890097	1
10021892	_hypernym	02003601	0
01725712	_derivationally_related_form	07480896	1
08276342	_hypernym	08167779	0
02542280	_derivationally_related_form	01203676	1
01222645	_hypernym	07622261	0
10515194	_derivationally_related_form	05945508	1
08543081	_derivationally_related_form	10768585	0
01958615	_derivationally_related_form	00299217	1
08877208	_synset_domain_topic_of	01235258	0
01398212	_hypernym	14989820	1
06878071	_member_of_domain_usage	08876773	0
02112891	_hypernym	02112029	1
10087736	_derivationally_related_form	01855672	0
04695963	_derivationally_related_form	01537409	1
03451473	_member_meronym	02964389	0
02491383	_derivationally_related_form	10526096	1
13290676	_verb_group	05816790	0
10489944	_hypernym	10707233	1
09893015	_also_see	00369399	0
01856225	_member_meronym	01856553	1
02190166	_synset_domain_topic_of	00810557	0
05748786	_derivationally_related_form	02666882	1
09367991	_also_see	06764623	0
00812526	_derivationally_related_form	01572978	1
13344804	_synset_domain_topic_of	01853072	0
01949110	_hypernym	01955984	1
01580928	_verb_group	08879197	0
02064131	_derivationally_related_form	13774404	1
01527271	_also_see	02520509	0
09334396	_derivationally_related_form	01502762	1
00273963	_member_meronym	06510977	0
09688008	_derivationally_related_form	02957823	1
08877208	_derivationally_related_form	01099436	0
05715864	_derivationally_related_form	02194495	1
07209305	_similar_to	00066397	0
04926427	_hypernym	04924103	1
01135795	_has_part	08168117	0
14798450	_derivationally_related_form	02627221	1
01041762	_has_part	01856225	0
01098869	_derivationally_related_form	01156438	1
07123288	_synset_domain_topic_of	05527216	0
01926984	_verb_group	02099829	1
01373844	_verb_group	07577657	0
02964389	_derivationally_related_form	01612084	1
01855672	_instance_hypernym	00213353	0
07635155	_hypernym	07628870	1
01179865	_derivationally_related_form	05243879	0
13291189	_derivationally_related_form	02543874	1
07889814	_derivationally_related_form	02000868	0
00753428	_hypernym	00752493	1
00856860	_member_meronym	01135795	0
01144657	_derivationally_related_form	00452293	1
10164747	_hypernym	02546467	0
01131043	_also_see	01125429	1
13552270	_also_see	01153947	0
01073241	_derivationally_related_form	01182293	1
06878071	_derivationally_related_form	01373844	0
01074650	_also_see	02530861	1
03479397	_derivationally_related_form	06698252	0
10488016	_hypernym	10632576	1
10024119	_verb_group	00984609	0
02632567	_derivationally_related_form	14493426	1
13398241	_similar_to	02994858	0
08277805	_derivationally_related_form	09759311	1
02880940	_member_meronym	00810557	0
05050379	_hypernym	05050115	1
14408086	_has_part	10408324	0
00470084	_derivationally_related_form	00233386	1
04792127	_hypernym	02254258	0
02666943	_derivationally_related_form	01322854	1
08879197	_verb_group	07575510	0
08873622	_has_part	08597023	1
13319726	_derivationally_related_form	02254258	0
01781983	_derivationally_related_form	14405931	1
04081281	_has_part	07575510	0
00299217	_derivationally_related_form	01958615	1
00514871	_derivationally_related_form	07569106	0
06220616	_hypernym	06212839	1
03171356	_verb_group	01240979	0
01904293	_derivationally_related_form	09281777	1
00300317	_similar_to	02250625	0
00481739	_derivationally_related_form	06667317	1
04339291	_verb_group	01240979	0
01182293	_derivationally_related_form	04638585	1
02957823	_synset_domain_topic_of	10026553	0
02046755	_derivationally_related_form	13878112	1
00066397	_similar_to	02677718	0
07813107	_derivationally_related_form	00213353	1
01118614	_has_part	07890068	0
00467717	_derivationally_related_form	05924920	1
01406684	_instance_hypernym	02017937	0
09759311	_derivationally_related_form	02669885	1
13138658	_instance_hypernym	02288295	0
00409211	_derivationally_related_form	02443849	1
00858377	_also_see	02326695	0
01775535	_hypernym	01775164	1
02547225	_member_of_domain_usage	05638778	0
10672662	_derivationally_related_form	05186306	1
10140783	_instance_hypernym	00858849	0
05707146	_derivationally_related_form	00614999	1
03469493	_instance_hypernym	10305802	0
02519991	_derivationally_related_form	00259643	1
00167934	_has_part	00537682	0
01845627	_member_meronym	01855672	1
06056923	_member_meronym	15155220	0
01390616	_derivationally_related_form	00113113	1
00962634	_member_meronym	05611302	0
14299070	_derivationally_related_form	00091124	1
00651630	_member_meronym	05513807	0
01955508	_derivationally_related_form	00121645	1
01966861	_member_of_domain_usage	01966861	0
01389329	_derivationally_related_form	00616083	1
00858377	_member_of_domain_usage	00351406	0
00596393	_derivationally_related_form	10464542	1
06882561	_also_see	05615147	0
00601822	_derivationally_related_form	00180770	1
07710007	_similar_to	03883664	0
02530861	_also_see	00853776	1
00514871	_derivationally_related_form	10768585	0
00560893	_derivationally_related_form	00358931	1
03764822	_member_of_domain_usage	09810364	0
01856748	_hypernym	01507175	1
14485064	_similar_to	05174653	0
08877208	_instance_hypernym	08633957	1
08877208	_member_of_domain_usage	01503268	0
06682794	_derivationally_related_form	01955127	1
09886010	_member_meronym	01672607	0
13855627	_derivationally_related_form	00661213	1
14989820	_has_part	03451473	0
00838367	_derivationally_related_form	01179865	1
07943480	_verb_group	02537407	0
03150232	_derivationally_related_form	01522276	1
02672859	_derivationally_related_form	02288295	0
01073822	_derivationally_related_form	04993413	1
05524243	_member_of_domain_usage	01928838	0
01944692	_derivationally_related_form	02858304	1
05681117	_hypernym	15237567	0
00350889	_hypernym	00350461	1
05681117	_member_meronym	02632567	0
02478059	_derivationally_related_form	14455700	1
01179865	_instance_hypernym	00358931	0
07238102	_derivationally_related_form	02677332	1
01828736	_synset_domain_topic_of	04730580	0
09424489	_derivationally_related_form	01816431	1
01928838	_also_see	09262690	0
02887209	_hypernym	04336034	1
00810557	_similar_to	02288295	0
13580723	_derivationally_related_form	01193721	1
15235126	_member_meronym	01574292	0
10093658	_derivationally_related_form	01140794	1
13421832	_verb_group	01542252	0
00330160	_derivationally_related_form	00438178	1
08402828	_member_meronym	13985818	0
13552270	_derivationally_related_form	00239614	1
10305802	_derivationally_related_form	08382297	0
01224744	_verb_group	00597385	1
13345286	_has_part	00880227	0
05219724	_has_part	05514905	1
01219993	_has_part	00658052	0
01354006	_derivationally_related_form	14705718	1
01928838	_synset_domain_topic_of	08033194	0
01234345	_derivationally_related_form	00421535	1
13358549	_also_see	01928838	0
04576211	_has_part	04574999	1
01855476	_instance_hypernym	08524735	0
02270165	_derivationally_related_form	10330189	1
10413276	_has_part	02387910	0
00044673	_derivationally_related_form	00417001	1
04659090	_synset_domain_topic_of	05639651	0
02250625	_derivationally_related_form	13282550	1
07569106	_also_see	03863262	0
00891216	_derivationally_related_form	13344804	1
03519578	_derivationally_related_form	03519578	0
00182213	_derivationally_related_form	02461314	1
14455700	_synset_domain_topic_of	02326198	0
14622893	_has_part	14619225	1
00300317	_also_see	01135795	0
05238282	_has_part	05244934	1
02387910	_instance_hypernym	10087736	0
05174653	_derivationally_related_form	02519991	1
01086945	_also_see	07889814	0
13282550	_derivationally_related_form	02519991	1
01098698	_member_meronym	00431893	0
03933529	_derivationally_related_form	02085742	1
05198036	_member_of_domain_usage	13398241	0
00366547	_derivationally_related_form	00357680	1
01849746	_verb_group	01292727	0
02519991	_derivationally_related_form	13290676	1
02003601	_hypernym	03078287	0
01493897	_derivationally_related_form	14425974	1
02329883	_member_meronym	08280124	0
04828255	_derivationally_related_form	01782519	1
01003729	_hypernym	01054227	0
08277805	_hypernym	08276720	1
08168117	_instance_hypernym	07622261	0
01406356	_verb_group	01406512	1
01387786	_similar_to	00985921	0
01487311	_hypernym	01488956	1
08504851	_member_meronym	15228378	0
04980656	_derivationally_related_form	01053144	1
03679986	_verb_group	10408324	0
15129927	_hypernym	05816790	1
00962634	_instance_hypernym	01305241	0
01537409	_derivationally_related_form	05244934	1
00358089	_verb_group	08873622	0
02531422	_also_see	00856860	1
09889941	_instance_hypernym	10644598	0
05003090	_derivationally_related_form	01882170	1
15163797	_has_part	00252710	0
02125641	_derivationally_related_form	05714466	1
10024119	_similar_to	02368336	0
00113113	_derivationally_related_form	01754105	1
14299070	_also_see	00622266	0
00695523	_also_see	01475282	1
01547001	_has_part	02332999	0
00658052	_derivationally_related_form	01009871	1
10722965	_member_meronym	02111684	0
06561942	_derivationally_related_form	00844298	1
01928838	_member_of_domain_usage	00622266	0
02235666	_verb_group	02537407	1
01945381	_instance_hypernym	00765193	0
13874073	_derivationally_related_form	00417001	1
10683126	_has_part	13766896	0
14971519	_derivationally_related_form	00238867	1
00537682	_derivationally_related_form	01305361	0
02291708	_synset_domain_topic_of	13333237	1
02191766	_instance_hypernym	01053339	0
01150467	_hypernym	01150200	1
01232246	_hypernym	00506040	0
13282550	_derivationally_related_form	02253456	1
08556491	_derivationally_related_form	07186148	0
13720096	_hypernym	13716084	1
03130073	_synset_domain_topic_of	09626238	0
01167780	_derivationally_related_form	03200357	1
01856225	_similar_to	03764822	0
01475282	_also_see	02451951	1
00015303	_has_part	05513807	0
10330189	_derivationally_related_form	02269894	1
02257141	_similar_to	05960464	0
08612049	_has_part	08495617	1
00182213	_verb_group	00810557	0
00105778	_derivationally_related_form	09930876	1
03479397	_similar_to	08276342	0
10478960	_derivationally_related_form	02163301	1
00066397	_verb_group	04782116	0
00842989	_derivationally_related_form	09762385	1
05331404	_hypernym	01134522	0
01097031	_derivationally_related_form	08397255	1
09287968	_verb_group	02551602	0
00657728	_derivationally_related_form	00874977	1
01292727	_member_of_domain_usage	05526175	0
02196690	_derivationally_related_form	14599641	1
07512465	_synset_domain_topic_of	02632353	0
01684337	_derivationally_related_form	00937656	1
02345272	_derivationally_related_form	00514871	0
00980908	_derivationally_related_form	06790042	1
00167934	_synset_domain_topic_of	02880940	0
00658052	_derivationally_related_form	06483454	1
00233386	_synset_domain_topic_of	03451473	0
05659365	_hypernym	05659621	1
00618057	_instance_hypernym	05245775	0
01074650	_derivationally_related_form	10112591	1
00265386	_instance_hypernym	08877208	0
02072501	_derivationally_related_form	13649791	1
00143204	_hypernym	00597957	0
01227137	_also_see	01370590	1
03451473	_hypernym	02094755	0
00800930	_hypernym	00685683	1
08556491	_synset_domain_topic_of	15234764	0
02250625	_derivationally_related_form	00259894	1
05615147	_has_part	00595146	0
13573666	_hypernym	13575433	1
00622266	_also_see	00880227	0
07551052	_derivationally_related_form	00859604	1
06201136	_derivationally_related_form	01432601	0
05527216	_has_part	05525628	1
02027612	_synset_domain_topic_of	10024119	0
00590148	_derivationally_related_form	09906986	1
03150232	_synset_domain_topic_of	04005630	0
09334396	_derivationally_related_form	01292727	1
08657249	_hypernym	09759311	0
00859604	_derivationally_related_form	01073241	1
01985029	_has_part	13384877	0
00843468	_derivationally_related_form	06730780	1
08504851	_member_meronym	01054227	0
09203827	_member_meronym	09316454	1
02672859	_member_of_domain_usage	00657016	0
00239614	_verb_group	00238867	1
09893015	_verb_group	09889941	0
01958615	_synset_domain_topic_of	00450335	1
01855476	_member_meronym	07696527	0
02700104	_derivationally_related_form	00552841	1
00889831	_member_of_domain_usage	05526175	0
01960911	_derivationally_related_form	00442115	1
13278375	_similar_to	07288639	0
04236001	_hypernym	03895866	1
04520480	_verb_group	00593108	0
06685456	_derivationally_related_form	00890100	1
04839676	_member_of_domain_usage	10717921	0
00365188	_verb_group	00365647	1
00212049	_synset_domain_topic_of	05615147	0
07450343	_hypernym	07447641	1
10334567	_also_see	01955984	0
08871007	_has_part	08877208	1
00622266	_member_of_domain_usage	07450343	0
00622584	_derivationally_related_form	01143838	1
04839676	_hypernym	14034177	0
06767777	_derivationally_related_form	01058880	1
09942871	_derivationally_related_form	02600255	0
01820302	_derivationally_related_form	07491981	1
02332999	_member_meronym	08153874	0
10293332	_derivationally_related_form	01924505	1
04606574	_instance_hypernym	13278375	0
09759311	_derivationally_related_form	08280124	1
08549733	_verb_group	10702615	0
02080577	_derivationally_related_form	02671880	1
00273963	_synset_domain_topic_of	01093587	0
00622266	_derivationally_related_form	01574292	1
03626115	_also_see	01305241	0
04493505	_derivationally_related_form	02079525	1
01522052	_synset_domain_topic_of	10717921	0
03216828	_derivationally_related_form	01305731	1
00293916	_derivationally_related_form	08153874	0
00657550	_derivationally_related_form	05737153	1
01475282	_hypernym	10515194	0
13969243	_derivationally_related_form	02700104	1
00274283	_hypernym	03130073	0
09612291	_derivationally_related_form	00869596	1
10644598	_has_part	01570562	0
01526956	_derivationally_related_form	03872495	1
02111684	_instance_hypernym	10676018	0
02672540	_derivationally_related_form	00259643	1
07752264	_derivationally_related_form	02257141	0
02058794	_also_see	02523275	1
02583139	_member_of_domain_usage	05043973	0
05524615	_hypernym	05525252	1
01177703	_synset_domain_topic_of	02001461	0
05014099	_derivationally_related_form	00328128	1
00185104	_instance_hypernym	03101796	0
02191766	_derivationally_related_form	05715864	1
00458754	_derivationally_related_form	00514871	0
00812274	_derivationally_related_form	01216004	1
07884567	_member_meronym	03248958	0
10298912	_derivationally_related_form	00595146	1
02743112	_also_see	00435688	0
01216522	_derivationally_related_form	00812526	1
00891850	_similar_to	00651630	0
00299580	_derivationally_related_form	05755486	1
04081281	_verb_group	07313004	0
00085678	_derivationally_related_form	02274482	1
01180975	_member_of_domain_usage	02677718	0
01547641	_verb_group	01547390	1
01924505	_member_meronym	00810557	0
15183428	_hypernym	15157225	1
00593108	_derivationally_related_form	07751451	0
06200010	_derivationally_related_form	00350461	1
03101796	_instance_hypernym	08311933	0
01027263	_derivationally_related_form	04659090	1
08873622	_similar_to	00812977	0
02085742	_derivationally_related_form	10655169	1
08657249	_member_of_domain_usage	04906273	0
01158690	_derivationally_related_form	00467717	1
01945381	_instance_hypernym	00451866	0
00851933	_derivationally_related_form	01224517	1
00583246	_also_see	15170504	0
00259643	_derivationally_related_form	02519991	1
00122661	_also_see	01153947	0
09826204	_derivationally_related_form	01941093	1
01955984	_also_see	05816622	0
13876371	_derivationally_related_form	02738544	1
14427239	_verb_group	01899360	0
02120458	_derivationally_related_form	00513401	1
01547641	_derivationally_related_form	10002760	0
01524298	_hypernym	01524871	1
00854150	_also_see	01067512	0
02653996	_derivationally_related_form	02945161	1
00874977	_has_part	01150200	0
10058411	_derivationally_related_form	01820302	1
01672607	_instance_hypernym	14425974	0
02834778	_has_part	04289690	1
01180975	_similar_to	00485711	0
02446164	_derivationally_related_form	00583461	1
00026192	_has_part	08871007	0
00015303	_derivationally_related_form	00858849	1
00599835	_hypernym	01945381	0
00842989	_derivationally_related_form	07234230	1
04463679	_has_part	00418615	0
00320486	_derivationally_related_form	02001858	1
00958823	_has_part	09612131	0
00963241	_hypernym	00962129	1
07943480	_similar_to	02677718	0
00356790	_derivationally_related_form	01387786	1
14865800	_instance_hypernym	01305241	0
14585519	_derivationally_related_form	00330144	1
07609840	_verb_group	00889831	0
01354405	_derivationally_related_form	04049405	1
01134522	_similar_to	08504851	0
15145586	_has_part	15146545	1
07512465	_member_of_domain_usage	07537259	0
02163301	_derivationally_related_form	01135529	1
00351406	_member_meronym	13325010	0
04854389	_hypernym	04827652	1
15228162	_instance_hypernym	01856225	0
01385920	_derivationally_related_form	09307300	1
13278375	_derivationally_related_form	14585519	0
00937656	_derivationally_related_form	01551871	1
10069645	_derivationally_related_form	09759501	0
02326695	_also_see	02451951	1
05257737	_verb_group	02443849	0
13279262	_hypernym	13281275	1
00957176	_synset_domain_topic_of	01955984	0
01179865	_derivationally_related_form	07800091	1
10002760	_instance_hypernym	01273263	0
13875970	_derivationally_related_form	00143204	1
03626115	_verb_group	01524298	0
01940403	_derivationally_related_form	00302394	1
01003729	_instance_hypernym	08168117	0
00061290	_derivationally_related_form	01955127	1
06877578	_derivationally_related_form	08153874	0
01951276	_derivationally_related_form	13326198	1
00274283	_member_meronym	07432973	0
00467717	_derivationally_related_form	13617952	1
00878052	_verb_group	00384620	0
02632567	_hypernym	02632353	1
02022359	_hypernym	03003730	0
00963283	_derivationally_related_form	00963241	1
01035199	_derivationally_related_form	02001461	0
01432601	_derivationally_related_form	10395073	1
00228535	_synset_domain_topic_of	00409211	0
01193099	_hypernym	01166351	1
01354405	_has_part	02784732	0
01961691	_synset_domain_topic_of	00441824	1
00419950	_has_part	03420559	0
00443231	_hypernym	00442115	1
00682436	_member_of_domain_usage	00513401	0
13649791	_hypernym	13603305	1
13757724	_has_part	14374432	0
05058140	_derivationally_related_form	00438178	1
02519991	_similar_to	02632353	0
01273263	_derivationally_related_form	02784732	1
13867641	_also_see	01086945	0
01131043	_also_see	02037272	1
00014405	_instance_hypernym	00213353	0
00136800	_derivationally_related_form	13446197	1
01945381	_member_of_domain_usage	01740892	0
01510827	_derivationally_related_form	14008806	1
00470084	_member_of_domain_usage	02254258	0
00683185	_also_see	01880531	1
07696527	_derivationally_related_form	13580723	0
00073828	_hypernym	00070965	1
01855672	_also_see	10024119	0
01640850	_also_see	00666058	1
00228535	_instance_hypernym	00843468	0
00658052	_derivationally_related_form	14429608	1
04257986	_derivationally_related_form	15237567	0
04565375	_derivationally_related_form	01087197	1
00724029	_member_of_domain_usage	02893338	0
02123672	_derivationally_related_form	05713737	1
06518068	_has_part	06730780	0
04046810	_hypernym	04048568	1
02112891	_instance_hypernym	10676018	0
01958615	_synset_domain_topic_of	00299217	1
13384877	_hypernym	08873269	0
07480068	_hypernym	00026192	1
02332999	_synset_domain_topic_of	14622893	0
03933529	_derivationally_related_form	01305731	1
00815801	_synset_domain_topic_of	01185981	0
08894456	_has_part	08895928	1
02964389	_similar_to	00889472	0
01193099	_derivationally_related_form	01073655	1
00854150	_instance_hypernym	02017937	0
02261464	_derivationally_related_form	08069878	1
07450343	_hypernym	02192992	0
01073655	_hypernym	01073241	1
01574292	_member_of_domain_usage	03971422	0
01535709	_also_see	01640850	1
07622261	_also_see	03617594	0
00854000	_derivationally_related_form	01226600	1
01985029	_verb_group	14299336	0
03000447	_derivationally_related_form	13575433	1
00815173	_has_part	03883664	0
10527334	_hypernym	10503452	1
00815801	_also_see	04995211	0
01840238	_derivationally_related_form	10096217	1
03150232	_hypernym	01098869	0
00890100	_derivationally_related_form	06685456	1
10334567	_derivationally_related_form	07071942	0
13282007	_derivationally_related_form	02249741	1
01848976	_member_meronym	07711471	0
00014742	_derivationally_related_form	15273626	1
02911158	_instance_hypernym	04792127	0
14798450	_hypernym	15010703	1
00470084	_similar_to	15200661	0
00208943	_derivationally_related_form	02405252	1
03823540	_also_see	02880940	0
02667228	_hypernym	02666882	1
00172732	_verb_group	00485711	0
02332999	_derivationally_related_form	07556637	1
05615147	_member_of_domain_usage	00239321	0
01100145	_derivationally_related_form	10782791	1
02005756	_has_part	00962634	0
14493426	_derivationally_related_form	02632567	1
04839676	_has_part	00537682	0
09361517	_hypernym	09437454	1
08556491	_has_part	13985818	0
01235258	_derivationally_related_form	01153486	1
01418179	_similar_to	06699225	0
00852922	_hypernym	00849080	1
01854047	_verb_group	03328201	0
00841628	_derivationally_related_form	01193721	1
02126022	_similar_to	07234230	0
01167981	_derivationally_related_form	03200357	1
02746365	_also_see	06882561	0
00619183	_derivationally_related_form	15159819	1
08402828	_verb_group	07246742	0
01854415	_hypernym	01852861	1
01489722	_derivationally_related_form	05734381	0
09906848	_hypernym	10474645	1
14299637	_member_meronym	01179865	0
13858045	_hypernym	13857486	1
01981279	_instance_hypernym	00513401	0
01845627	_member_meronym	01854047	1
01134522	_similar_to	09957156	0
00105778	_derivationally_related_form	00513401	1
07866151	_member_meronym	04400289	0
01510827	_derivationally_related_form	00409211	1
01489989	_instance_hypernym	02519991	0
01100145	_derivationally_related_form	10782940	1
07751451	_has_part	05658603	0
01639105	_derivationally_related_form	03772269	1
02672859	_member_of_domain_usage	10209731	0
02384686	_derivationally_related_form	07186148	1
02123672	_member_meronym	06056923	0
14436875	_derivationally_related_form	02237631	1
10676018	_similar_to	10413276	0
14429608	_hypernym	14429985	1
08153874	_hypernym	03003730	0
01182024	_derivationally_related_form	01197338	1
01475831	_member_meronym	00761713	0
00459114	_hypernym	00458754	1
00964343	_has_part	01169067	0
05645199	_derivationally_related_form	00609100	1
00463778	_member_meronym	01853072	0
10768585	_derivationally_related_form	01093172	1
01848123	_derivationally_related_form	02210119	0
00609506	_derivationally_related_form	01941093	1
00453935	_synset_domain_topic_of	05243704	0
01820302	_derivationally_related_form	10058411	1
10305802	_synset_domain_topic_of	08555333	0
04135315	_hypernym	03872495	1
00843468	_verb_group	13649791	0
00300317	_hypernym	00299580	1
08167365	_has_part	01305361	0
09622302	_derivationally_related_form	01775535	1
09892693	_verb_group	01305241	0
07238102	_derivationally_related_form	02636921	1
01574292	_instance_hypernym	07512465	0
07183151	_derivationally_related_form	00869126	1
00550242	_derivationally_related_form	07449862	0
02043982	_derivationally_related_form	08612049	1
10614363	_hypernym	10142747	0
00853633	_derivationally_related_form	06778102	1
00889831	_verb_group	01858910	0
14889479	_derivationally_related_form	00239614	1
00843468	_hypernym	01572978	0
01941093	_derivationally_related_form	10433164	1
05456732	_derivationally_related_form	06700030	0
00043480	_derivationally_related_form	05714466	1
01121855	_also_see	00419950	0
08278324	_hypernym	08276342	1
01135795	_similar_to	04995211	0
09861946	_derivationally_related_form	01944692	1
02537407	_verb_group	00485711	0
09747329	_derivationally_related_form	03130073	1
00313647	_synset_domain_topic_of	00483181	0
05658603	_derivationally_related_form	02124748	1
03764822	_member_meronym	02092309	0
00724029	_derivationally_related_form	13421462	1
00167934	_verb_group	00583246	0
01190840	_derivationally_related_form	07891726	1
13326198	_has_part	02000868	0
02274482	_derivationally_related_form	00085678	1
05706228	_synset_domain_topic_of	10717921	0
01020117	_similar_to	01017738	1
02257141	_instance_hypernym	15259284	0
02174311	_derivationally_related_form	07380144	1
06715786	_member_meronym	04782116	0
02464342	_hypernym	02463704	1
05331404	_member_meronym	07722485	0
07460104	_derivationally_related_form	01914947	1
01855476	_hypernym	10702615	0
00588473	_derivationally_related_form	09759501	1
14427239	_member_meronym	05257737	0
00135718	_also_see	01880531	1
00658052	_member_of_domain_usage	04993882	0
02053941	_verb_group	01849746	1
07512465	_also_see	00856860	0
00550016	_derivationally_related_form	10318892	1
02334867	_has_part	00366547	0
01021579	_derivationally_related_form	00958823	1
02632567	_derivationally_related_form	00419950	0
01475282	_also_see	01613463	1
07609840	_similar_to	01234729	0
00384620	_derivationally_related_form	00261405	1
03420559	_member_meronym	03420559	0
01203676	_derivationally_related_form	02662979	1
01117723	_similar_to	13325010	0
13529616	_derivationally_related_form	02672859	1
02880940	_member_meronym	07707451	0
05046471	_hypernym	05046009	1
00233386	_synset_domain_topic_of	00657728	0
01387786	_derivationally_related_form	01741562	1
03096960	_has_part	03697109	0
00366547	_verb_group	00364868	1
01246579	_hypernym	08287586	0
00858849	_derivationally_related_form	00016380	1
07449862	_instance_hypernym	07209305	0
00076072	_hypernym	00074790	1
01475831	_similar_to	13325010	0
03199901	_has_part	03905730	1
02551602	_synset_domain_topic_of	06883073	0
00231567	_derivationally_related_form	02478059	1
00889472	_verb_group	00856860	0
15166462	_has_part	15169421	1
02657219	_hypernym	01523986	0
08654360	_hypernym	08491826	1
00014405	_verb_group	03469493	0
13622591	_has_part	13622209	1
10529965	_member_of_domain_usage	03624966	0
00657550	_derivationally_related_form	00874977	1
01219993	_synset_domain_topic_of	02911158	0
00453935	_derivationally_related_form	01140794	1
05734381	_instance_hypernym	02957823	0
00754731	_derivationally_related_form	10672192	1
00596692	_member_meronym	07884567	0
04665813	_derivationally_related_form	02529284	1
06055946	_hypernym	00017282	0
02402409	_derivationally_related_form	00215838	1
00538876	_hypernym	06254669	0
01882170	_derivationally_related_form	04544979	1
03191776	_also_see	13875970	0
00302394	_derivationally_related_form	01941093	1
13985818	_has_part	00550242	0
14619225	_has_part	09272085	1
00252710	_verb_group	00070965	0
02652494	_derivationally_related_form	10269458	1
07537259	_also_see	02000868	0
04046810	_derivationally_related_form	01954559	1
01406684	_similar_to	00550016	0
01186208	_hypernym	01194418	1
14889479	_member_of_domain_usage	01614079	0
00759694	_derivationally_related_form	10702781	1
05706228	_member_meronym	01179865	0
00660102	_derivationally_related_form	10506762	1
04242704	_verb_group	00622266	0
15122231	_derivationally_related_form	00490968	1
05177285	_member_meronym	07890068	0
08571139	_hypernym	08523483	1
01856748	_similar_to	10026553	0
15166462	_has_part	15169248	1
00066397	_derivationally_related_form	13985818	0
04440749	_hypernym	03533972	1
01179865	_derivationally_related_form	01851996	0
02519991	_derivationally_related_form	13341756	1
00593108	_member_of_domain_usage	00356790	0
07847198	_derivationally_related_form	01418037	1
07260623	_similar_to	08587828	0
01242716	_derivationally_related_form	02512922	1
00167934	_derivationally_related_form	01510827	0
09889941	_hypernym	10744164	1
01158596	_hypernym	01118614	0
02252931	_derivationally_related_form	01120448	1
08382297	_member_of_domain_usage	08555333	0
02566227	_derivationally_related_form	10157744	1
00300317	_also_see	13326198	0
04157320	_derivationally_related_form	01551871	1
00182213	_also_see	02125641	0
09334396	_derivationally_related_form	02022359	1
06254669	_also_see	04460947	0
01996735	_derivationally_related_form	08428019	1
05382729	_derivationally_related_form	02693168	0
10529965	_derivationally_related_form	01957529	1
01856225	_member_of_domain_usage	02677332	0
10769321	_derivationally_related_form	02493260	1
02523275	_has_part	10221312	0
01940403	_derivationally_related_form	10096217	1
15164957	_synset_domain_topic_of	01855476	0
00555648	_derivationally_related_form	02055649	1
10280130	_member_meronym	00538876	0
06508816	_derivationally_related_form	01001643	1
14361182	_instance_hypernym	02202133	0
03309465	_has_part	04082886	1
07123288	_member_of_domain_usage	08168117	0
00239614	_hypernym	00239321	1
13766896	_also_see	01222666	0
02005756	_derivationally_related_form	04864515	1
04792127	_derivationally_related_form	09810364	0
01782218	_derivationally_related_form	07520612	1
13398241	_hypernym	13720096	0
01223182	_derivationally_related_form	13877918	1
00550242	_synset_domain_topic_of	00228535	0
01136614	_derivationally_related_form	03467984	1
01547001	_instance_hypernym	03823540	0
02478059	_derivationally_related_form	00231567	1
00228535	_similar_to	07537259	0
00595146	_derivationally_related_form	10298912	1
04595855	_verb_group	10069645	0
00980908	_derivationally_related_form	05960464	1
06715786	_verb_group	01015104	0
00365188	_derivationally_related_form	00365471	1
13358549	_derivationally_related_form	07071942	0
07543288	_derivationally_related_form	01775164	1
02677718	_hypernym	03101796	0
06778102	_derivationally_related_form	00105554	1
00622266	_has_part	02600255	0
00891216	_derivationally_related_form	10209731	1
02669885	_verb_group	00070965	0
10760340	_derivationally_related_form	02461314	1
08691669	_instance_hypernym	04907269	0
13358549	_hypernym	13384557	1
10042300	_synset_domain_topic_of	02880940	0
00074790	_hypernym	00070965	1
13319726	_derivationally_related_form	00499066	0
00452293	_derivationally_related_form	02003601	1
10214390	_has_part	01851996	0
02994858	_derivationally_related_form	00329831	1
00159899	_instance_hypernym	04928416	0
15165490	_hypernym	15228378	1
09886010	_synset_domain_topic_of	07722217	0
02210119	_verb_group	02236124	1
00962634	_member_of_domain_usage	04336034	0
00643197	_derivationally_related_form	09790278	1
00984609	_synset_domain_topic_of	02566227	0
02529284	_derivationally_related_form	00066397	1
00499066	_instance_hypernym	10285135	0
00264875	_derivationally_related_form	13426238	1
05706629	_similar_to	02384940	0
00754731	_derivationally_related_form	06513366	1
13421832	_also_see	07722485	0
01219706	_derivationally_related_form	02886599	1
07943480	_derivationally_related_form	13297850	0
08587828	_hypernym	08491826	1
08504851	_verb_group	07182485	0
01765392	_derivationally_related_form	00759551	1
01887020	_verb_group	03519578	0
02046755	_derivationally_related_form	07440979	1
05382729	_also_see	14455206	0
06201136	_derivationally_related_form	10402086	1
04257986	_member_of_domain_usage	00358089	0
00882961	_derivationally_related_form	02123672	1
09892693	_similar_to	00651954	0
04660080	_hypernym	05207130	1
10087736	_synset_domain_topic_of	08504851	0
04879658	_derivationally_related_form	00963283	1
00985921	_has_part	02191766	0
10051975	_derivationally_related_form	00416135	1
01167981	_member_meronym	13398241	0
02079525	_derivationally_related_form	05246511	1
01158596	_has_part	08879197	0
01510827	_derivationally_related_form	07338114	1
10742546	_instance_hypernym	06056923	0
14889479	_hypernym	14865800	1
02112891	_instance_hypernym	01887020	0
10084635	_derivationally_related_form	00800421	1
00209546	_also_see	15170504	0
09790278	_hypernym	10488016	1
06669384	_synset_domain_topic_of	02669885	0
07246742	_derivationally_related_form	00807461	1
10280945	_verb_group	01945381	0
00087152	_also_see	01922763	1
00458754	_instance_hypernym	07512465	0
07204911	_derivationally_related_form	02473431	1
01234729	_member_of_domain_usage	10142747	0
10299250	_derivationally_related_form	02592397	1
01524871	_also_see	01524871	0
07677593	_hypernym	07675627	1
01928838	_has_part	01232246	0
05714161	_hypernym	05713737	1
00374668	_instance_hypernym	05734381	0
10433737	_derivationally_related_form	01180975	1
01099436	_also_see	01524298	0
00849080	_derivationally_related_form	10561320	1
01098869	_instance_hypernym	13297850	0
00302394	_derivationally_related_form	01940403	1
00622266	_similar_to	00622266	0
02344243	_hypernym	02344060	1
01246579	_also_see	02023341	0
00258854	_derivationally_related_form	00199659	1
01232246	_verb_group	05046009	0
01960911	_derivationally_related_form	10683126	1
01547641	_also_see	07246742	0
01912893	_derivationally_related_form	04544979	1
01547001	_derivationally_related_form	03121897	0
02368336	_also_see	02395115	1
00618057	_instance_hypernym	00657728	0
02037272	_also_see	01549291	1
09218641	_synset_domain_topic_of	15228162	0
02738031	_hypernym	04566257	1
06960298	_instance_hypernym	01222666	0
07186148	_derivationally_related_form	01470225	1
00438178	_has_part	10742546	0
00031820	_also_see	00802136	1
03065424	_member_of_domain_usage	01983771	0
02395115	_also_see	01073822	1
01765392	_also_see	06271778	0
02583139	_derivationally_related_form	00962129	1
03624966	_has_part	01135795	0
04465933	_hypernym	03605722	1
13138658	_member_of_domain_usage	14361182	0
02523275	_derivationally_related_form	05042871	1
02202133	_similar_to	02125641	0
02657219	_derivationally_related_form	04713428	1
01928838	_hypernym	09886010	0
00070965	_derivationally_related_form	00842538	1
00358089	_instance_hypernym	01725712	0
09759311	_derivationally_related_form	08279298	1
01015104	_verb_group	02911158	0
01522052	_derivationally_related_form	00345641	1
02288295	_member_meronym	08891889	0
14425974	_derivationally_related_form	01489722	1
00765193	_synset_domain_topic_of	00891850	0
15159819	_derivationally_related_form	00619183	1
02521816	_has_part	07712382	0
01570562	_hypernym	01387786	1
01240979	_member_meronym	13358549	0
00616857	_derivationally_related_form	10351625	1
01954559	_hypernym	03694761	0
00739270	_derivationally_related_form	00311663	1
04159354	_derivationally_related_form	01928838	0
02274482	_derivationally_related_form	09810364	1
00537682	_derivationally_related_form	01524871	0
02418205	_derivationally_related_form	05769471	1
08543081	_hypernym	00724029	0
15170786	_has_part	15171008	1
01093587	_has_part	02001461	0
01857632	_derivationally_related_form	01053339	1
03393017	_instance_hypernym	08555333	0
09366017	_hypernym	09287968	1
07313004	_similar_to	09847010	0
04842515	_derivationally_related_form	01587077	1
01182293	_has_part	01242716	0
02462580	_verb_group	02461314	1
01489722	_hypernym	02368336	0
02389220	_derivationally_related_form	13939353	1
01134522	_derivationally_related_form	13421832	0
02022486	_derivationally_related_form	09334396	1
00492677	_also_see	01106272	0
04713428	_derivationally_related_form	02657219	1
07890068	_also_see	02957823	0
00511212	_hypernym	00510189	1
01222666	_has_part	07450343	0
09879744	_derivationally_related_form	02566227	1
00889472	_verb_group	08555333	0
00321486	_derivationally_related_form	03873064	1
01041762	_verb_group	00657016	0
00259894	_derivationally_related_form	02250625	1
09952163	_synset_domain_topic_of	00233386	0
02924116	_derivationally_related_form	01949110	1
01489989	_member_of_domain_usage	04159354	0
10002760	_derivationally_related_form	02521410	1
13752679	_similar_to	01097031	0
00135718	_derivationally_related_form	04721650	1
00014405	_similar_to	05243704	0
02055649	_derivationally_related_form	00330160	1
02463704	_member_meronym	04606574	0
01522276	_derivationally_related_form	10781984	1
02005756	_synset_domain_topic_of	00463778	0
00922867	_derivationally_related_form	01004582	1
06777687	_synset_domain_topic_of	04907269	0
02667900	_hypernym	02657219	1
00365471	_member_of_domain_usage	03823540	0
08895771	_instance_hypernym	08524735	1
04839676	_derivationally_related_form	08504851	0
15137047	_hypernym	15163005	1
10782791	_member_meronym	02911158	0
02700104	_verb_group	02657219	1
05382729	_verb_group	06715786	0
03624966	_derivationally_related_form	01671039	1
03872495	_hypernym	13720096	0
02402409	_hypernym	02405252	1
06596179	_hypernym	01106272	0
