# Supplementary material
Source: ML conference proceedings conference paper supplement (https://proceedings.neurips.cc/paper_files/paper/2021/hash/0fd600c953cde8121262e322ef09f70e-Abstract.html)
Supplement: Supplementary file 1 [file 0fd600c953cde8121262e322ef09f70e-Supplemental.zip › Supplementary_Material_Paper_8745/data/GraIL-BM_WN18RR_v2/train/train.txt]

01130169	_derivationally_related_form	09614684
01023259	_derivationally_related_form	06763681
08164585	_member_meronym	08381636
00506672	_derivationally_related_form	13485408
04184435	_derivationally_related_form	00142191
07291312	_derivationally_related_form	00484166
13102409	_derivationally_related_form	01921964
00906367	_derivationally_related_form	01189282
02627555	_derivationally_related_form	04353803
06817782	_derivationally_related_form	01004062
00261604	_derivationally_related_form	00293141
06744000	_hypernym	06738281
02308741	_derivationally_related_form	10670310
02958343	_hypernym	03791235
00427397	_derivationally_related_form	00230172
10724699	_hypernym	10335931
06746580	_derivationally_related_form	00965871
02614181	_derivationally_related_form	00004475
01987228	_member_meronym	01987353
00756338	_derivationally_related_form	06730563
10349243	_hypernym	09615465
04149208	_hypernym	04208210
00945205	_hypernym	00941777
05562249	_hypernym	05560244
00872886	_derivationally_related_form	09968845
00426608	_derivationally_related_form	14498096
01378556	_also_see	02077148
03259505	_derivationally_related_form	02459633
10725280	_derivationally_related_form	00959827
00605086	_derivationally_related_form	05943300
08569591	_hypernym	08593262
06558277	_synset_domain_topic_of	08441203
05325378	_synset_domain_topic_of	06054700
13903387	_hypernym	13903079
02161432	_derivationally_related_form	05168261
00794079	_derivationally_related_form	07252764
02455407	_derivationally_related_form	00880662
02992070	_derivationally_related_form	05125377
02208537	_hypernym	02210855
05860200	_derivationally_related_form	00246217
02131279	_derivationally_related_form	10067968
04526964	_hypernym	03183080
10154601	_derivationally_related_form	02419773
02603926	_derivationally_related_form	00698855
03233905	_hypernym	03094503
04694441	_derivationally_related_form	01538928
02064745	_derivationally_related_form	02666239
15256915	_synset_domain_topic_of	00455599
00548781	_also_see	02383831
10055566	_hypernym	09946957
01014821	_hypernym	01010118
04692908	_derivationally_related_form	00336260
01090335	_derivationally_related_form	00446493
01921964	_derivationally_related_form	07370410
05151088	_derivationally_related_form	01834304
01340439	_hypernym	01296462
00649481	_derivationally_related_form	05785311
05532225	_has_part	05547508
01156834	_derivationally_related_form	00838098
05143690	_derivationally_related_form	00205046
05772667	_hypernym	05772356
01704236	_derivationally_related_form	00545501
14213328	_derivationally_related_form	02034986
02607909	_derivationally_related_form	09777353
05196375	_hypernym	05190804
00070816	_derivationally_related_form	07289014
02339413	_derivationally_related_form	10387712
13812607	_hypernym	00031921
06796642	_hypernym	06796506
07313814	_hypernym	07331400
05786372	_derivationally_related_form	00739082
00753685	_derivationally_related_form	02593001
00908492	_derivationally_related_form	01753788
02913152	_has_part	04143365
05638063	_derivationally_related_form	09974648
00337903	_derivationally_related_form	09442838
00415044	_derivationally_related_form	08374049
00235435	_hypernym	00199130
04596630	_hypernym	04424218
01756719	_hypernym	01698271
13754293	_hypernym	13576355
10724699	_derivationally_related_form	02232190
10513120	_derivationally_related_form	01700934
00255214	_derivationally_related_form	00035603
01329239	_derivationally_related_form	00715674
00146138	_verb_group	00125841
02011810	_derivationally_related_form	01778568
01356750	_derivationally_related_form	14704465
07009946	_derivationally_related_form	01756719
00081836	_hypernym	00081572
01201773	_derivationally_related_form	00495998
02499629	_derivationally_related_form	01160342
00879356	_derivationally_related_form	10484526
00811355	_derivationally_related_form	02281093
10801291	_derivationally_related_form	00993014
04687333	_derivationally_related_form	01807882
04876985	_hypernym	04723816
00344040	_derivationally_related_form	01346978
05117660	_derivationally_related_form	02510337
08482271	_derivationally_related_form	01999423
00879607	_derivationally_related_form	01843904
02229055	_hypernym	02200686
02028994	_derivationally_related_form	00369138
01079480	_derivationally_related_form	07467846
09780828	_derivationally_related_form	00751887
00946499	_derivationally_related_form	00264386
00683280	_derivationally_related_form	00644839
01560984	_hypernym	01556921
01783158	_derivationally_related_form	05946687
04728068	_hypernym	05093890
02293321	_derivationally_related_form	01108753
02974219	_hypernym	04588365
07217924	_derivationally_related_form	00965035
02808440	_hypernym	04531098
03234306	_derivationally_related_form	01690294
13412321	_hypernym	13403643
00217956	_derivationally_related_form	14535431
00488770	_derivationally_related_form	01253277
11414411	_hypernym	11410625
00044455	_derivationally_related_form	00423971
01041111	_hypernym	01206153
01458228	_derivationally_related_form	13534274
02335828	_derivationally_related_form	13580415
00702601	_derivationally_related_form	15283097
07073208	_derivationally_related_form	00978549
00704388	_hypernym	00628491
07358060	_derivationally_related_form	01280014
00281101	_derivationally_related_form	04956594
05573895	_has_part	05574151
01626138	_derivationally_related_form	09946957
00971999	_verb_group	00715239
04004475	_hypernym	03699975
06782680	_hypernym	06782019
10524973	_derivationally_related_form	00779360
02984104	_derivationally_related_form	10467179
00803617	_hypernym	00407535
00912960	_hypernym	00030358
05546540	_has_part	05547508
01807882	_derivationally_related_form	04687333
00782527	_derivationally_related_form	02776205
00923995	_hypernym	00912960
02572119	_derivationally_related_form	00780148
00949619	_derivationally_related_form	02809692
00765649	_derivationally_related_form	07252378
10752093	_derivationally_related_form	02500619
00704690	_derivationally_related_form	10438172
01626138	_derivationally_related_form	09949946
10381369	_derivationally_related_form	00480969
00046534	_derivationally_related_form	02728440
09930257	_derivationally_related_form	00484166
08374049	_hypernym	07965085
04060065	_hypernym	02974219
01458464	_derivationally_related_form	14997888
00185857	_derivationally_related_form	02840619
01022008	_derivationally_related_form	02376429
01410223	_derivationally_related_form	10178216
02537092	_hypernym	02536557
14498096	_derivationally_related_form	01534147
01645601	_derivationally_related_form	06740402
10720453	_derivationally_related_form	02244956
03079741	_derivationally_related_form	00483801
00024814	_hypernym	00109660
00872886	_derivationally_related_form	06650701
05930736	_hypernym	05726345
05138488	_derivationally_related_form	00681429
01635432	_hypernym	01636397
00205891	_hypernym	00030358
02294436	_derivationally_related_form	09784707
10338707	_derivationally_related_form	01327301
05770926	_derivationally_related_form	00739340
00430140	_derivationally_related_form	01155687
02913152	_has_part	03307274
02877704	_derivationally_related_form	05601198
07421316	_derivationally_related_form	00434374
00719231	_hypernym	00717358
00941990	_derivationally_related_form	07080868
00574218	_derivationally_related_form	00847340
00665886	_derivationally_related_form	02806261
00153961	_hypernym	00151497
02056971	_derivationally_related_form	03242713
00600370	_derivationally_related_form	00582868
00634472	_derivationally_related_form	10510339
00583990	_also_see	02291843
05036394	_derivationally_related_form	00227165
02700867	_derivationally_related_form	02964634
02874282	_derivationally_related_form	08188449
00030358	_hypernym	00029378
02303331	_derivationally_related_form	00205891
01018928	_derivationally_related_form	05822746
02330742	_derivationally_related_form	13354420
00017222	_synset_domain_topic_of	06066555
07177924	_derivationally_related_form	00698855
00760956	_derivationally_related_form	07150644
00001740	_derivationally_related_form	00831191
01405044	_hypernym	01511706
13477462	_hypernym	00029677
13266170	_derivationally_related_form	10251779
02744977	_derivationally_related_form	00795785
02527431	_derivationally_related_form	10089615
00624263	_derivationally_related_form	06372095
01532589	_derivationally_related_form	03040587
13286640	_hypernym	13285176
00948071	_derivationally_related_form	00634586
01048466	_derivationally_related_form	00442063
02958343	_has_part	04588365
05978812	_hypernym	05967977
01909397	_hypernym	01907258
04071876	_hypernym	03744840
00773402	_hypernym	00774107
00489837	_derivationally_related_form	00996969
01083645	_derivationally_related_form	02234087
00597915	_derivationally_related_form	10251779
05767733	_derivationally_related_form	01636397
02148788	_derivationally_related_form	07167415
02537092	_derivationally_related_form	14984973
00945401	_derivationally_related_form	01316401
01506157	_verb_group	01509584
00125841	_derivationally_related_form	07324673
01082454	_synset_domain_topic_of	00471613
01210352	_hypernym	01206218
01912159	_derivationally_related_form	09387222
02661252	_derivationally_related_form	04802776
07993109	_member_meronym	07993279
00095747	_hypernym	00094460
13367070	_derivationally_related_form	02323059
00382109	_derivationally_related_form	01461152
00647542	_derivationally_related_form	09979072
03791235	_has_part	03103128
10509605	_hypernym	00007846
04153751	_hypernym	03323703
00980453	_hypernym	00943837
01783022	_derivationally_related_form	07510625
02687172	_has_part	03363216
08436759	_synset_domain_topic_of	00017222
00404222	_derivationally_related_form	05726345
00283127	_hypernym	00279835
13446390	_synset_domain_topic_of	06084469
05539138	_hypernym	05538625
02459633	_derivationally_related_form	03259505
14507951	_derivationally_related_form	02557199
02728440	_derivationally_related_form	00046534
06726939	_derivationally_related_form	00861560
00274707	_derivationally_related_form	00281101
00596807	_derivationally_related_form	02984104
08566554	_hypernym	08566028
05051896	_derivationally_related_form	00781000
00295701	_derivationally_related_form	01845720
02367363	_also_see	02376429
01033527	_hypernym	00964911
00879759	_derivationally_related_form	02118933
00859001	_derivationally_related_form	00717358
04516672	_hypernym	03563967
05534333	_hypernym	05298729
14000403	_derivationally_related_form	09777353
02179279	_also_see	01222360
00841986	_derivationally_related_form	14854581
06742932	_derivationally_related_form	00828374
00531302	_derivationally_related_form	07335414
13572436	_derivationally_related_form	00575720
00215314	_hypernym	00209943
00282050	_derivationally_related_form	01993926
00608896	_hypernym	00606370
01846320	_derivationally_related_form	00312553
07233214	_derivationally_related_form	00864159
01217043	_derivationally_related_form	04360501
00641252	_hypernym	00637259
02170427	_derivationally_related_form	05650579
10225219	_derivationally_related_form	00593944
00084562	_hypernym	00497705
01229071	_derivationally_related_form	03194992
07988857	_derivationally_related_form	01292885
04689198	_hypernym	04688246
00815686	_derivationally_related_form	07200527
01685313	_derivationally_related_form	00643250
00033020	_derivationally_related_form	02231661
00205885	_derivationally_related_form	00248977
14535431	_derivationally_related_form	00215800
00075021	_derivationally_related_form	14016361
00916464	_has_part	00921790
01279978	_derivationally_related_form	14436438
10689564	_derivationally_related_form	01666717
03600977	_hypernym	03605915
04861486	_hypernym	04616059
00785008	_derivationally_related_form	07196682
02040054	_hypernym	02066510
07018931	_derivationally_related_form	01719921
02014553	_hypernym	02014165
02450505	_verb_group	01302019
05718254	_derivationally_related_form	02180529
06254007	_hypernym	06253690
00754956	_derivationally_related_form	01721754
02611630	_hypernym	02604760
01778990	_synset_domain_topic_of	05946687
00949619	_hypernym	00949134
02396205	_derivationally_related_form	00163779
00978549	_derivationally_related_form	09811712
09379111	_derivationally_related_form	01593614
06609503	_derivationally_related_form	01036804
02235229	_derivationally_related_form	10679998
01656788	_derivationally_related_form	03533486
02106006	_hypernym	02106506
02436349	_derivationally_related_form	01133281
02569790	_derivationally_related_form	07339329
02225492	_derivationally_related_form	10553627
00250259	_derivationally_related_form	00411020
07272545	_derivationally_related_form	01356750
10090498	_derivationally_related_form	02248465
08499840	_derivationally_related_form	10583387
06589574	_derivationally_related_form	01744611
02875013	_derivationally_related_form	01467370
02036578	_also_see	01319874
01653442	_hypernym	01653873
00652466	_hypernym	00635012
06389230	_hypernym	05128519
00171127	_derivationally_related_form	06320801
00295701	_derivationally_related_form	02102002
13370448	_derivationally_related_form	02256109
14841267	_derivationally_related_form	00442267
00205046	_derivationally_related_form	05143690
07014752	_derivationally_related_form	00066191
01170962	_derivationally_related_form	01090335
02573275	_derivationally_related_form	00754424
01582645	_verb_group	01690294
07885223	_hypernym	07578363
01719302	_derivationally_related_form	06893885
02659763	_derivationally_related_form	04930307
01122194	_derivationally_related_form	10533013
00022686	_derivationally_related_form	04836683
04780958	_derivationally_related_form	01627965
00633864	_derivationally_related_form	00789138
01169744	_derivationally_related_form	02742638
03335030	_hypernym	04552348
00070816	_derivationally_related_form	14055408
02468864	_hypernym	01896031
10155849	_derivationally_related_form	04928903
02556126	_derivationally_related_form	10407954
00874067	_derivationally_related_form	00670261
06671637	_derivationally_related_form	00882948
13777344	_hypernym	13576355
01012561	_hypernym	01012073
09912995	_derivationally_related_form	00661824
02675701	_derivationally_related_form	09964411
00838856	_also_see	00834198
00879759	_derivationally_related_form	02455407
14403107	_hypernym	14373582
05785885	_derivationally_related_form	00704388
06481320	_hypernym	06637824
00818553	_derivationally_related_form	07216083
00607114	_hypernym	00597915
02687172	_hypernym	04552696
05075602	_derivationally_related_form	01494310
15113229	_hypernym	13575869
00483146	_derivationally_related_form	01090446
05968450	_derivationally_related_form	10370381
13904843	_derivationally_related_form	01559055
00383390	_hypernym	00376063
01369346	_verb_group	01369758
00637259	_derivationally_related_form	00301187
00443384	_hypernym	00109660
01345109	_also_see	01587062
00644583	_derivationally_related_form	05787005
06468123	_derivationally_related_form	00243900
00632236	_hypernym	00719734
00631391	_derivationally_related_form	04802198
00643250	_also_see	01865197
13266170	_hypernym	13265904
10480018	_derivationally_related_form	02157100
13960117	_derivationally_related_form	01934554
01460029	_hypernym	01458973
10490699	_derivationally_related_form	00975902
08164585	_derivationally_related_form	02448185
00245457	_hypernym	00253761
05128519	_hypernym	05123416
10003120	_derivationally_related_form	02148788
01321456	_derivationally_related_form	15152817
06153186	_derivationally_related_form	03018498
15152817	_has_part	15153472
06648207	_hypernym	06643408
00201671	_derivationally_related_form	01435380
04424218	_hypernym	00021939
07578879	_derivationally_related_form	01195299
07344663	_derivationally_related_form	02040054
06568978	_hypernym	06566077
07518663	_derivationally_related_form	02558172
01128390	_hypernym	01123598
02950154	_derivationally_related_form	01476483
04692908	_derivationally_related_form	00336539
01417451	_derivationally_related_form	00949288
00540235	_verb_group	00540946
00334996	_derivationally_related_form	00376400
01919931	_derivationally_related_form	07122730
04694441	_derivationally_related_form	01252425
01989873	_also_see	01457954
11498203	_hypernym	11458624
10388924	_derivationally_related_form	00809465
00628491	_derivationally_related_form	10708454
01588172	_derivationally_related_form	04870340
01134781	_derivationally_related_form	10593115
00157957	_derivationally_related_form	02569790
01995211	_verb_group	01351170
10085217	_hypernym	09939313
11444117	_derivationally_related_form	02109818
00058743	_derivationally_related_form	02074677
10067968	_derivationally_related_form	00697062
01157517	_derivationally_related_form	01867502
00907147	_derivationally_related_form	10776339
10533983	_derivationally_related_form	01048939
02557199	_derivationally_related_form	14507951
15226732	_hypernym	15113229
03597469	_derivationally_related_form	01678685
03285912	_hypernym	02735688
01974062	_derivationally_related_form	00116376
13779032	_has_part	13600822
05269901	_has_part	05472032
04377057	_hypernym	03575240
00336922	_derivationally_related_form	09258715
00205046	_verb_group	00205885
15143276	_hypernym	15266911
15140405	_derivationally_related_form	10261041
00860292	_hypernym	00856824
02278939	_also_see	00873603
13558696	_hypernym	13524925
02338975	_hypernym	02327200
02338386	_derivationally_related_form	14875077
10740017	_derivationally_related_form	00824066
00780889	_derivationally_related_form	02321757
01817938	_derivationally_related_form	07251779
06524935	_derivationally_related_form	02919275
00046534	_also_see	00044149
00987071	_derivationally_related_form	07201365
00263947	_derivationally_related_form	00510364
00434374	_derivationally_related_form	00708017
02992070	_derivationally_related_form	14513259
00644066	_derivationally_related_form	05774129
10007109	_derivationally_related_form	02412939
01200440	_hypernym	01156834
01326291	_hypernym	00004475
04162998	_derivationally_related_form	02701962
01194331	_hypernym	01181475
00512749	_derivationally_related_form	02468864
02958343	_has_part	04357121
04143365	_derivationally_related_form	01358023
01929254	_derivationally_related_form	00285889
07248060	_hypernym	07247071
00520257	_derivationally_related_form	02148788
02283324	_hypernym	02202384
01138523	_derivationally_related_form	13342987
00877327	_derivationally_related_form	10523076
00708376	_derivationally_related_form	05927813
05328867	_hypernym	05327767
03540595	_has_part	04549919
06749881	_derivationally_related_form	00712135
02970685	_has_part	02767433
00735571	_hypernym	02432530
00958334	_derivationally_related_form	13503908
10207831	_derivationally_related_form	00784342
05051896	_derivationally_related_form	02727462
00286605	_verb_group	01531998
01236164	_derivationally_related_form	07410021
06193727	_hypernym	06193203
06766190	_derivationally_related_form	01024190
13565379	_derivationally_related_form	00644066
00661824	_derivationally_related_form	05738625
06712325	_derivationally_related_form	00827730
01990281	_hypernym	01969216
07284554	_hypernym	07283608
05728678	_hypernym	05726596
00535452	_derivationally_related_form	13864965
00237078	_derivationally_related_form	01651444
06760722	_hypernym	06758225
00125436	_derivationally_related_form	01247804
00228236	_derivationally_related_form	00278403
01778990	_hypernym	01778568
05898568	_derivationally_related_form	00704690
05761918	_derivationally_related_form	00609683
10140314	_derivationally_related_form	00592795
06678302	_derivationally_related_form	01747945
03122748	_hypernym	00021939
02735897	_hypernym	02670398
05194043	_derivationally_related_form	02586121
00332835	_derivationally_related_form	08509442
10483530	_derivationally_related_form	01881696
11498203	_derivationally_related_form	02713852
01320009	_derivationally_related_form	13085864
02618149	_verb_group	02614181
01552519	_also_see	01309701
00311809	_derivationally_related_form	01843055
00949093	_hypernym	00948853
01088923	_derivationally_related_form	00586262
02479323	_derivationally_related_form	01057200
01859586	_derivationally_related_form	01063697
01640207	_verb_group	01621555
00173338	_also_see	00641252
03961939	_hypernym	03536348
10767519	_hypernym	10791221
00567291	_derivationally_related_form	04689198
01638368	_derivationally_related_form	05898568
02612762	_derivationally_related_form	09608002
01346003	_derivationally_related_form	00338641
06532095	_synset_domain_topic_of	08441203
01552519	_derivationally_related_form	03154073
02208537	_derivationally_related_form	06522501
09774783	_derivationally_related_form	00827730
02595662	_derivationally_related_form	07342049
07202812	_derivationally_related_form	00956250
02964634	_derivationally_related_form	02701210
03224032	_has_part	03221720
00044150	_derivationally_related_form	01642924
06782680	_derivationally_related_form	00921072
13777344	_derivationally_related_form	02479323
09981540	_derivationally_related_form	00614489
07650637	_hypernym	07649854
01149138	_derivationally_related_form	09614684
00084562	_derivationally_related_form	03740161
00647542	_also_see	00996448
02609203	_hypernym	02604760
05141222	_derivationally_related_form	02500884
09754907	_derivationally_related_form	00243900
01176897	_derivationally_related_form	03201208
01110274	_derivationally_related_form	02728784
02038357	_hypernym	02035919
02286687	_derivationally_related_form	07214432
03082979	_has_part	02924713
05835747	_derivationally_related_form	01633343
00903559	_derivationally_related_form	10426749
00932324	_hypernym	00955148
00690614	_derivationally_related_form	06208751
02210855	_derivationally_related_form	08419163
02576921	_derivationally_related_form	10076957
05068080	_hypernym	05074774
02629793	_derivationally_related_form	00525453
06367373	_derivationally_related_form	00116619
07361416	_derivationally_related_form	01986367
01817314	_derivationally_related_form	07491286
02073714	_derivationally_related_form	09755241
00838524	_hypernym	01719302
01113068	_derivationally_related_form	02727883
01039330	_derivationally_related_form	10597505
02436349	_derivationally_related_form	01474513
00660971	_hypernym	00681429
01426153	_hypernym	01425892
00739662	_derivationally_related_form	07974025
00938247	_derivationally_related_form	07170753
02199590	_hypernym	02220461
00018158	_derivationally_related_form	00324384
10514784	_derivationally_related_form	00474492
01312371	_derivationally_related_form	13894306
07209965	_hypernym	07208338
01802689	_derivationally_related_form	07496755
00828082	_derivationally_related_form	02147109
01026095	_derivationally_related_form	07230502
00921014	_also_see	01343918
00846515	_derivationally_related_form	01426397
07413899	_derivationally_related_form	00237259
02559180	_also_see	01172889
07342049	_derivationally_related_form	01727490
01322509	_hypernym	01552519
10399299	_derivationally_related_form	00893167
10466198	_derivationally_related_form	02219940
03683708	_has_part	02933462
05462057	_hypernym	05237227
09941964	_synset_domain_topic_of	08199025
09901143	_synset_domain_topic_of	00471613
00955601	_derivationally_related_form	06377133
07647870	_has_part	07650637
00611481	_derivationally_related_form	07452841
09279458	_derivationally_related_form	01637982
05491612	_has_part	05497363
01119169	_derivationally_related_form	09821253
07252378	_derivationally_related_form	01230710
01016002	_hypernym	01016778
02679530	_hypernym	02679899
10475297	_derivationally_related_form	01747945
01178565	_derivationally_related_form	01086081
01053617	_hypernym	00030358
00938247	_derivationally_related_form	05928513
01841079	_derivationally_related_form	07311115
04050410	_hypernym	04451818
02213690	_hypernym	02212825
02310007	_derivationally_related_form	00089351
06308049	_derivationally_related_form	01298283
00163779	_derivationally_related_form	02391803
09798534	_hypernym	09774783
01171644	_hypernym	01170962
00053913	_derivationally_related_form	00173338
07130050	_hypernym	07109847
06528783	_derivationally_related_form	00672433
01290255	_derivationally_related_form	02755352
02656763	_derivationally_related_form	03201208
00875394	_derivationally_related_form	07162680
02106506	_derivationally_related_form	05805902
05708432	_hypernym	05701944
03800933	_derivationally_related_form	10340312
00813790	_hypernym	00813978
00388635	_derivationally_related_form	10008716
04194289	_has_part	03167666
07361416	_derivationally_related_form	01989053
10661563	_derivationally_related_form	05905348
05591256	_hypernym	05289861
02730265	_derivationally_related_form	01363648
01617192	_derivationally_related_form	09976429
10004539	_derivationally_related_form	02014165
02641463	_hypernym	02367363
01250335	_derivationally_related_form	02482425
15258450	_hypernym	05867413
00928630	_derivationally_related_form	09962789
00795008	_hypernym	00791078
02958343	_has_part	04085017
01039330	_derivationally_related_form	06875697
00193486	_hypernym	00182406
04723816	_derivationally_related_form	00956687
06253140	_hypernym	06251781
02285629	_verb_group	02247977
03269401	_hypernym	03183080
02304982	_derivationally_related_form	06593099
08565894	_hypernym	08512259
01280014	_derivationally_related_form	07358060
01931768	_derivationally_related_form	01142519
00908492	_derivationally_related_form	01685313
13489037	_hypernym	13526110
13864965	_hypernym	13860793
00819508	_derivationally_related_form	09954479
15271008	_derivationally_related_form	02641035
03061081	_derivationally_related_form	05996646
04981139	_derivationally_related_form	02179518
10030277	_derivationally_related_form	01701311
00158804	_derivationally_related_form	07375214
13903079	_derivationally_related_form	02710673
06762711	_derivationally_related_form	00961329
03169390	_derivationally_related_form	02748927
07939382	_hypernym	07938773
01471682	_has_part	02157557
05058580	_hypernym	05044528
03674440	_hypernym	03738241
08198137	_member_meronym	08198398
01989053	_derivationally_related_form	07477945
09949946	_derivationally_related_form	01744888
00414174	_hypernym	00413876
02513460	_hypernym	02512305
00772640	_derivationally_related_form	06648724
01016316	_derivationally_related_form	06559365
00069879	_derivationally_related_form	07313636
07969695	_derivationally_related_form	13812607
00684480	_derivationally_related_form	04754440
00621058	_derivationally_related_form	14379703
01506157	_derivationally_related_form	00170156
15255804	_has_part	15256022
09939313	_derivationally_related_form	00775156
08512736	_derivationally_related_form	00730301
00630223	_hypernym	00628491
05920791	_derivationally_related_form	02634808
00567044	_synset_domain_topic_of	00482298
10005721	_derivationally_related_form	02394445
00929839	_hypernym	00943837
06511874	_derivationally_related_form	00698855
01316401	_hypernym	01315613
04061969	_hypernym	03285912
02608347	_verb_group	02608823
00315986	_derivationally_related_form	01435380
05821775	_derivationally_related_form	01195299
00956131	_also_see	01369663
00879356	_hypernym	00875394
10630188	_derivationally_related_form	00941990
10599806	_derivationally_related_form	07110615
03040587	_derivationally_related_form	01532589
10439851	_derivationally_related_form	01072949
00376994	_derivationally_related_form	00335366
00066191	_derivationally_related_form	07014752
10718131	_derivationally_related_form	00310666
07389569	_hypernym	07371293
01627965	_derivationally_related_form	01810447
05547508	_has_part	05529159
05474346	_hypernym	05475681
01199035	_derivationally_related_form	02578008
02106006	_derivationally_related_form	05651971
01312810	_also_see	02290029
07298982	_derivationally_related_form	01783022
13440063	_hypernym	13526110
02728142	_hypernym	02604760
01329239	_derivationally_related_form	04321238
02387486	_derivationally_related_form	10665698
13986372	_derivationally_related_form	01812324
05268965	_derivationally_related_form	01194938
00954271	_derivationally_related_form	07221094
00697062	_derivationally_related_form	10565302
00908492	_derivationally_related_form	01621555
00797697	_derivationally_related_form	14412725
13465530	_hypernym	13518963
01635432	_derivationally_related_form	05767733
02148788	_derivationally_related_form	00520257
02729023	_derivationally_related_form	08482271
00973056	_derivationally_related_form	06254007
00805376	_verb_group	01035530
00952182	_derivationally_related_form	10743675
09800964	_derivationally_related_form	02396205
09858299	_derivationally_related_form	02581073
00261029	_hypernym	00248977
02036578	_also_see	02584981
01548718	_derivationally_related_form	00397760
00906735	_hypernym	01010118
06022291	_derivationally_related_form	02661252
00430140	_derivationally_related_form	01138523
01108753	_derivationally_related_form	02293321
04321534	_derivationally_related_form	02323286
00993014	_derivationally_related_form	10801291
07423560	_derivationally_related_form	00339464
01689379	_hypernym	01690294
00976653	_derivationally_related_form	07247071
10680609	_hypernym	09615807
00378985	_derivationally_related_form	01461328
09443136	_hypernym	09258715
01921964	_derivationally_related_form	10334957
00823669	_derivationally_related_form	06711855
00816143	_hypernym	00815686
01104624	_derivationally_related_form	00752954
02294179	_hypernym	02201644
01698271	_derivationally_related_form	00929718
00766418	_hypernym	00770437
02891188	_hypernym	02889425
07337390	_derivationally_related_form	01876907
01721754	_derivationally_related_form	00754956
02251743	_hypernym	02199590
01787955	_verb_group	01788733
13485408	_derivationally_related_form	00506672
00752431	_hypernym	00751145
00826509	_derivationally_related_form	05734018
01995549	_verb_group	02679899
09775663	_derivationally_related_form	00591236
09939313	_derivationally_related_form	01091427
00931232	_derivationally_related_form	06733227
00074038	_verb_group	00072012
07325190	_derivationally_related_form	00348746
01109863	_hypernym	01076615
01637368	_derivationally_related_form	05632446
02681795	_also_see	01131473
01466978	_derivationally_related_form	08513163
05919866	_derivationally_related_form	00931852
01170962	_derivationally_related_form	00775156
00651991	_verb_group	00921738
02025009	_derivationally_related_form	08274565
00144694	_derivationally_related_form	07375214
00664276	_derivationally_related_form	06855035
10168012	_derivationally_related_form	00809654
01347678	_derivationally_related_form	00827638
00043195	_derivationally_related_form	02128066
02214485	_derivationally_related_form	13368052
02400037	_hypernym	02397637
00976487	_derivationally_related_form	10482220
02498320	_derivationally_related_form	05795460
01438681	_derivationally_related_form	06556692
00939277	_hypernym	00831651
01789270	_derivationally_related_form	01628302
01021629	_derivationally_related_form	05795044
01974062	_derivationally_related_form	10773394
00994076	_derivationally_related_form	00615887
01590171	_hypernym	01291069
02661252	_derivationally_related_form	11415084
00586262	_derivationally_related_form	02333689
08550076	_derivationally_related_form	01311103
02809692	_derivationally_related_form	00949619
14534696	_hypernym	13920835
05755883	_derivationally_related_form	00607405
04768483	_hypernym	04767347
09897696	_hypernym	09629752
02260362	_derivationally_related_form	01110274
05936381	_derivationally_related_form	01636008
00162632	_derivationally_related_form	00699815
00688377	_derivationally_related_form	05697976
00765977	_derivationally_related_form	00282485
00941990	_derivationally_related_form	05302499
02650840	_derivationally_related_form	07942152
00632627	_derivationally_related_form	10510339
01843689	_derivationally_related_form	10757193
02154312	_hypernym	02163746
07357679	_derivationally_related_form	00474017
02156063	_hypernym	02154508
00598215	_hypernym	00586262
01563724	_derivationally_related_form	03894379
01686132	_hypernym	01619354
02418421	_derivationally_related_form	00426928
01503061	_has_part	01896031
03303965	_hypernym	03848729
00727573	_hypernym	00726300
09610660	_derivationally_related_form	00742320
00383275	_hypernym	00382635
00953216	_derivationally_related_form	07222823
14486122	_derivationally_related_form	00720063
06678302	_hypernym	06349220
01068134	_hypernym	00993014
02733122	_verb_group	02202928
02064887	_hypernym	01907258
05898568	_hypernym	05833840
03621049	_hypernym	04516672
01096497	_derivationally_related_form	13945102
10431625	_derivationally_related_form	00676450
00248026	_derivationally_related_form	15153787
00510364	_hypernym	00509607
00199309	_derivationally_related_form	06762380
05697976	_hypernym	05697135
03859958	_derivationally_related_form	02339413
00102586	_hypernym	00069879
00447309	_derivationally_related_form	15047313
00770437	_derivationally_related_form	05827684
00283127	_derivationally_related_form	01835496
00712135	_hypernym	00670261
02383440	_verb_group	02009433
01018366	_derivationally_related_form	00317888
01111375	_derivationally_related_form	02460199
02687916	_derivationally_related_form	05123416
02265231	_derivationally_related_form	05662532
02796412	_derivationally_related_form	01127215
00235918	_derivationally_related_form	06807198
07578363	_hypernym	13760316
10481268	_derivationally_related_form	00994076
00726300	_verb_group	00726784
03659292	_hypernym	02788689
03509025	_hypernym	04516874
01716619	_derivationally_related_form	07018931
01146039	_derivationally_related_form	02553697
00654625	_derivationally_related_form	09926862
01241331	_hypernym	01247647
13954253	_derivationally_related_form	02603699
08164585	_derivationally_related_form	00404642
08164585	_derivationally_related_form	02431971
02189714	_derivationally_related_form	10042690
10249950	_hypernym	10480253
01734502	_derivationally_related_form	05860200
02472033	_derivationally_related_form	13412321
05445668	_hypernym	05297523
05641959	_derivationally_related_form	00597634
05682950	_derivationally_related_form	02678438
01609287	_derivationally_related_form	00114431
03401721	_has_part	03401500
01146918	_hypernym	01090335
01675963	_derivationally_related_form	00261604
01313411	_derivationally_related_form	04561548
00192836	_hypernym	00022686
00709379	_hypernym	00704690
00882948	_derivationally_related_form	06694540
02413480	_derivationally_related_form	00575741
00813790	_derivationally_related_form	01256743
10673451	_derivationally_related_form	00875394
15267536	_derivationally_related_form	00351963
00033020	_derivationally_related_form	01070102
00824292	_hypernym	00824767
13083586	_has_part	05511286
00279835	_derivationally_related_form	01855606
06558277	_hypernym	06556692
00230172	_derivationally_related_form	02156546
15269513	_hypernym	00033615
06163751	_derivationally_related_form	10269785
06369829	_has_part	06373747
06766190	_derivationally_related_form	01020005
14997888	_derivationally_related_form	01458464
06399995	_derivationally_related_form	01699700
00858781	_derivationally_related_form	07139700
00037919	_derivationally_related_form	02808440
01011166	_derivationally_related_form	00946588
09964411	_hypernym	00007846
02310482	_hypernym	02284951
00602805	_derivationally_related_form	00729108
09179776	_hypernym	09178821
07423365	_derivationally_related_form	00125841
02733524	_hypernym	04341686
01999423	_verb_group	02729023
08061042	_hypernym	08056231
01394464	_hypernym	00338071
02510337	_derivationally_related_form	05641959
00331655	_derivationally_related_form	02012344
00029677	_hypernym	00001930
00350380	_derivationally_related_form	00780575
00923995	_derivationally_related_form	01654628
05763412	_derivationally_related_form	01026095
02945971	_derivationally_related_form	00887081
00443116	_verb_group	00443384
11669335	_has_part	11690893
02145543	_verb_group	01478002
02707429	_derivationally_related_form	00949134
03746574	_hypernym	03540595
08630985	_hypernym	00027167
00297507	_hypernym	00296178
01471682	_hypernym	01466257
00163779	_derivationally_related_form	02396716
08456993	_derivationally_related_form	00276883
01169704	_also_see	01197980
13814041	_hypernym	13812607
01149470	_verb_group	01079873
01734502	_derivationally_related_form	01249060
01583494	_verb_group	01583656
02150948	_verb_group	02129289
09769345	_derivationally_related_form	00897564
01115916	_hypernym	01091427
10637635	_hypernym	10693824
01018928	_derivationally_related_form	06770875
01113068	_derivationally_related_form	02244956
00668099	_derivationally_related_form	05032565
07073208	_hypernym	07139873
10066732	_hypernym	09824361
00820976	_derivationally_related_form	06643408
00771961	_derivationally_related_form	07251619
01201089	_derivationally_related_form	05546040
01256600	_derivationally_related_form	10789963
07374756	_derivationally_related_form	00184117
00842692	_derivationally_related_form	01186428
05090441	_derivationally_related_form	00240293
05776015	_hypernym	05775081
14407536	_derivationally_related_form	01806505
07313814	_derivationally_related_form	02431320
00788184	_derivationally_related_form	07193958
10521662	_derivationally_related_form	00967098
02479323	_hypernym	02479990
01086103	_hypernym	01072262
10027590	_derivationally_related_form	02537812
11447851	_derivationally_related_form	01650425
01020005	_derivationally_related_form	05703429
00348746	_derivationally_related_form	00235435
05172596	_derivationally_related_form	01279978
00747418	_derivationally_related_form	05194578
05763916	_hypernym	05760202
01793177	_derivationally_related_form	07550666
00754424	_derivationally_related_form	02573275
01455184	_hypernym	01974062
02171039	_derivationally_related_form	00882159
06796642	_derivationally_related_form	00975036
01498769	_derivationally_related_form	05209822
06649915	_derivationally_related_form	00820352
13086908	_hypernym	00019128
02290461	_derivationally_related_form	05157574
04904851	_hypernym	04904664
05946687	_derivationally_related_form	01783158
01449974	_verb_group	01061320
01062555	_derivationally_related_form	00121166
03209141	_hypernym	02935017
01637166	_derivationally_related_form	05833840
06043075	_derivationally_related_form	00084230
05598147	_hypernym	05300231
10565302	_hypernym	10067968
05732756	_derivationally_related_form	00654625
00352558	_hypernym	02367363
09774783	_derivationally_related_form	00876332
10490699	_hypernym	09610660
00697062	_derivationally_related_form	13411157
00237078	_derivationally_related_form	02432530
00250181	_hypernym	00252019
00368592	_derivationally_related_form	02030424
07213395	_derivationally_related_form	00933821
01714208	_derivationally_related_form	06891493
01974773	_has_part	02156532
06353934	_derivationally_related_form	00994076
01206153	_derivationally_related_form	00887463
04490091	_has_part	02918595
05109808	_hypernym	05107765
06333653	_derivationally_related_form	01028748
07514345	_derivationally_related_form	02116118
09911570	_derivationally_related_form	01036804
07524760	_hypernym	07523905
00914420	_derivationally_related_form	07123012
01883344	_derivationally_related_form	00331655
07209965	_derivationally_related_form	00907147
07959943	_derivationally_related_form	02025009
02913152	_has_part	04226537
00170156	_derivationally_related_form	01131197
00006484	_has_part	05445668
10468559	_hypernym	09966255
06763273	_derivationally_related_form	01020934
01385458	_derivationally_related_form	09465459
02207206	_derivationally_related_form	00081572
14286549	_derivationally_related_form	01254013
10752093	_derivationally_related_form	02574205
03281145	_hypernym	03664675
05789432	_derivationally_related_form	00648977
00280586	_hypernym	00191142
05805475	_derivationally_related_form	00588888
13273550	_derivationally_related_form	00689673
03270165	_has_part	03560567
07131854	_derivationally_related_form	00978549
02296153	_hypernym	00952524
05984584	_derivationally_related_form	00596644
14494716	_hypernym	13920835
01253060	_derivationally_related_form	00004605
02492362	_derivationally_related_form	00426928
00463246	_hypernym	00455599
00658082	_has_part	04074482
00917300	_derivationally_related_form	05892096
01075164	_synset_domain_topic_of	00523513
09448361	_derivationally_related_form	09415938
00340463	_derivationally_related_form	01418667
01215168	_hypernym	01212519
00751944	_derivationally_related_form	01653442
01310660	_derivationally_related_form	08550076
00849523	_hypernym	00844254
00296946	_derivationally_related_form	01912159
07370671	_derivationally_related_form	01974062
14419164	_hypernym	14418395
00795863	_hypernym	00751567
10284064	_derivationally_related_form	01659248
00314272	_derivationally_related_form	00375625
05599203	_hypernym	05225602
10721470	_derivationally_related_form	02245993
01447632	_hypernym	01871979
00918872	_derivationally_related_form	09279458
02435867	_derivationally_related_form	00242583
01731031	_derivationally_related_form	10599806
02541251	_derivationally_related_form	08186047
01054335	_hypernym	01053920
00203753	_hypernym	00203342
00781000	_derivationally_related_form	01017987
05677340	_derivationally_related_form	00715239
00991151	_derivationally_related_form	06479665
00282485	_derivationally_related_form	00765977
00144694	_derivationally_related_form	13899404
01362736	_derivationally_related_form	00717208
04473432	_has_part	02687992
00233335	_derivationally_related_form	13903079
00921738	_hypernym	00921300
01803380	_derivationally_related_form	10695555
05568767	_hypernym	05474346
00908672	_derivationally_related_form	06605396
01123415	_synset_domain_topic_of	00464894
14424780	_hypernym	00024720
00198631	_hypernym	00198451
06709692	_derivationally_related_form	00864159
00739340	_derivationally_related_form	05786372
00633443	_derivationally_related_form	10634316
01559055	_derivationally_related_form	13904843
00233335	_derivationally_related_form	05846355
10365514	_derivationally_related_form	01231252
07498854	_derivationally_related_form	00680841
02701962	_derivationally_related_form	04162998
00200397	_derivationally_related_form	10044879
04878861	_derivationally_related_form	00959731
01808626	_hypernym	01808769
00928077	_hypernym	00927261
04837425	_derivationally_related_form	00512487
10079399	_hypernym	10176679
02571511	_derivationally_related_form	00783063
05108947	_hypernym	05107765
04748836	_derivationally_related_form	00650353
02681795	_also_see	00495808
00125841	_derivationally_related_form	07423365
01509584	_verb_group	01506157
05870180	_hypernym	05869584
07370671	_derivationally_related_form	01968569
01312810	_derivationally_related_form	04208210
01369758	_derivationally_related_form	00708017
05855125	_derivationally_related_form	00489837
01731031	_derivationally_related_form	07048000
00125841	_hypernym	00109660
01149138	_hypernym	02453889
01079873	_verb_group	01079480
08055150	_derivationally_related_form	02479323
03259505	_has_part	02821627
01082606	_derivationally_related_form	13924659
00295701	_derivationally_related_form	01846916
00397953	_derivationally_related_form	10402285
01347678	_hypernym	01347298
07388987	_hypernym	07371293
00681429	_derivationally_related_form	00996969
05823932	_derivationally_related_form	01015244
01275762	_hypernym	01276970
02550296	_hypernym	02547586
07420770	_derivationally_related_form	00102586
01035530	_derivationally_related_form	13971065
01959294	_derivationally_related_form	04767347
13285714	_hypernym	13285176
01060234	_derivationally_related_form	02479323
10549510	_hypernym	10522759
02376429	_hypernym	02378623
01136519	_hypernym	01135952
00071178	_derivationally_related_form	00421437
08663354	_derivationally_related_form	02081178
04076846	_derivationally_related_form	01686132
00155487	_derivationally_related_form	02695895
00798245	_derivationally_related_form	01516534
10635275	_derivationally_related_form	02301502
06589574	_hypernym	04599396
13990502	_derivationally_related_form	00904046
02451370	_derivationally_related_form	05689249
05300231	_hypernym	05299178
00220522	_hypernym	00220023
06792645	_derivationally_related_form	00973056
00765977	_verb_group	02406916
01063350	_hypernym	01062817
00895304	_derivationally_related_form	09614684
00367976	_derivationally_related_form	01380122
00278403	_derivationally_related_form	00228236
07129867	_hypernym	07109847
01090446	_has_part	01105259
04681387	_derivationally_related_form	01004062
14778436	_hypernym	00020090
00446493	_derivationally_related_form	01090335
05271383	_derivationally_related_form	02646072
00940842	_derivationally_related_form	01632411
01110274	_derivationally_related_form	02260362
00932088	_derivationally_related_form	00532607
02661252	_derivationally_related_form	06022291
00932636	_derivationally_related_form	06601327
02030424	_derivationally_related_form	07331759
01146918	_derivationally_related_form	01171644
07250339	_derivationally_related_form	02043665
00968211	_derivationally_related_form	00368302
07199565	_derivationally_related_form	00815686
00311809	_derivationally_related_form	10596689
00812580	_hypernym	00813978
00884011	_derivationally_related_form	10482054
00751529	_hypernym	00751145
00474308	_derivationally_related_form	00751529
01719921	_verb_group	01719302
01171183	_verb_group	01172275
02284951	_derivationally_related_form	01121690
02166460	_verb_group	00813044
10279018	_derivationally_related_form	03699975
02327200	_derivationally_related_form	13777344
00955987	_hypernym	00952963
09222051	_derivationally_related_form	01259458
00125436	_hypernym	00046522
05560787	_has_part	05379734
02558172	_derivationally_related_form	14477667
03740161	_synset_domain_topic_of	06043075
00964694	_derivationally_related_form	07133701
02228698	_derivationally_related_form	01085098
10068804	_hypernym	10708454
01356750	_hypernym	01290422
09257949	_derivationally_related_form	01207951
01921204	_derivationally_related_form	00289175
01476483	_derivationally_related_form	03839993
00141806	_derivationally_related_form	00663353
02245765	_synset_domain_topic_of	01090446
00875246	_hypernym	00874067
00071178	_derivationally_related_form	00422551
01848465	_verb_group	00613393
04695176	_derivationally_related_form	00281101
01138911	_derivationally_related_form	00430140
01474513	_derivationally_related_form	02443049
01854132	_verb_group	02311387
04353803	_derivationally_related_form	01385170
06256229	_derivationally_related_form	02153023
02409148	_derivationally_related_form	00623370
00217014	_derivationally_related_form	00388635
01459896	_derivationally_related_form	00926668
03753077	_hypernym	03733925
02387034	_derivationally_related_form	10722575
01149480	_derivationally_related_form	01583494
02540670	_hypernym	02547586
00060201	_derivationally_related_form	02075049
01817938	_hypernym	01818235
09822955	_derivationally_related_form	00697062
10731848	_derivationally_related_form	01921204
14562324	_derivationally_related_form	01564144
14373582	_synset_domain_topic_of	06136258
10078806	_hypernym	09614315
01714208	_synset_domain_topic_of	06157326
00681429	_derivationally_related_form	05736149
14481929	_hypernym	13954253
08462320	_hypernym	07951464
04728068	_derivationally_related_form	00300761
00896803	_derivationally_related_form	01241767
01449974	_derivationally_related_form	02687172
00555138	_derivationally_related_form	02058191
05539595	_hypernym	08663354
03093792	_hypernym	03605915
00684480	_derivationally_related_form	00701877
02230056	_verb_group	02229550
00006484	_synset_domain_topic_of	06037666
00780575	_derivationally_related_form	00350380
07975026	_derivationally_related_form	02428924
00772189	_derivationally_related_form	05651680
05692419	_derivationally_related_form	00701040
04754440	_hypernym	04754237
07540866	_derivationally_related_form	02558172
02109818	_derivationally_related_form	00219575
07221756	_derivationally_related_form	00953216
00081836	_derivationally_related_form	02325968
01952898	_hypernym	01951480
01104406	_hypernym	01094725
00048129	_derivationally_related_form	00640828
09821253	_derivationally_related_form	01119169
00692329	_derivationally_related_form	05780104
00237078	_derivationally_related_form	01659248
10005280	_derivationally_related_form	02394445
10468962	_derivationally_related_form	02443609
02179279	_also_see	02460502
00155487	_hypernym	00151497
00495998	_hypernym	00494269
10431625	_hypernym	00007846
05502556	_has_part	05504107
14286549	_derivationally_related_form	01309143
02265231	_derivationally_related_form	00618734
01072949	_derivationally_related_form	10439851
01144355	_hypernym	01144133
06649915	_derivationally_related_form	00820976
00035758	_hypernym	00040353
01003570	_hypernym	00996969
06507041	_derivationally_related_form	02472033
07332148	_hypernym	07331759
02637202	_derivationally_related_form	01053617
02480923	_hypernym	00795863
01970646	_hypernym	01970826
13872421	_derivationally_related_form	01498872
14419164	_derivationally_related_form	02622234
00107739	_derivationally_related_form	00376994
00610374	_hypernym	00607780
01033458	_derivationally_related_form	02382087
13527965	_hypernym	13518963
11531090	_derivationally_related_form	00017222
07951464	_hypernym	00031264
02408965	_hypernym	01158872
13954253	_derivationally_related_form	00927017
02466670	_derivationally_related_form	01126856
06608143	_derivationally_related_form	01036804
05840650	_derivationally_related_form	00123170
10641755	_derivationally_related_form	00785690
09848489	_derivationally_related_form	00683280
02651014	_hypernym	02649830
05601198	_hypernym	05225090
04051825	_derivationally_related_form	01130607
01564144	_derivationally_related_form	07334490
00007846	_has_part	05217168
00236289	_hypernym	00233335
02244956	_derivationally_related_form	08063446
09764900	_hypernym	00007846
10794014	_derivationally_related_form	02651014
10695555	_derivationally_related_form	01787955
02629793	_verb_group	01033527
00218045	_derivationally_related_form	01656458
03782190	_has_part	03857828
01048912	_derivationally_related_form	02144835
00635850	_derivationally_related_form	02153387
01558883	_derivationally_related_form	09437369
00512186	_hypernym	00126264
00511817	_derivationally_related_form	01883716
06797169	_derivationally_related_form	00921300
07140978	_derivationally_related_form	00772640
04453910	_derivationally_related_form	01336635
13275288	_derivationally_related_form	02267060
02339413	_derivationally_related_form	03294048
05388805	_has_part	05343718
13307784	_hypernym	13306870
01876907	_derivationally_related_form	04770911
02163746	_derivationally_related_form	05654362
04728786	_hypernym	04723816
00892861	_derivationally_related_form	00830761
00647094	_derivationally_related_form	01498769
00644583	_derivationally_related_form	02708711
09909060	_hypernym	09605289
01970348	_derivationally_related_form	07445480
04876985	_derivationally_related_form	00958880
01133760	_derivationally_related_form	01732921
00954608	_hypernym	00952524
00403334	_hypernym	00403092
00527572	_derivationally_related_form	13491060
06818121	_hypernym	06817782
10624540	_hypernym	09947232
00834198	_also_see	00838856
00121366	_derivationally_related_form	02079933
00947128	_hypernym	00407535
11458624	_derivationally_related_form	01448100
06568978	_has_part	06582403
02648639	_derivationally_related_form	01054335
00161739	_derivationally_related_form	01696648
13742358	_derivationally_related_form	00637259
00644839	_derivationally_related_form	00683280
02736778	_derivationally_related_form	03173524
07185076	_derivationally_related_form	02297948
02282365	_derivationally_related_form	00372607
10381369	_hypernym	10383237
05560787	_has_part	05591256
02157100	_derivationally_related_form	07006951
05566504	_derivationally_related_form	01209953
01904930	_hypernym	01835496
03903424	_derivationally_related_form	01935476
07211092	_derivationally_related_form	00909219
01620854	_derivationally_related_form	07291794
13134947	_hypernym	11675842
10623354	_hypernym	10420031
13993517	_derivationally_related_form	00338071
02281093	_derivationally_related_form	13367070
07139700	_hypernym	06252138
04729710	_derivationally_related_form	00946499
02549847	_hypernym	02549581
02586619	_derivationally_related_form	15295416
01080366	_hypernym	00030358
01255967	_hypernym	01552519
02608347	_derivationally_related_form	00235435
05660937	_derivationally_related_form	02945971
00894738	_derivationally_related_form	05794403
00329227	_derivationally_related_form	02066939
00792471	_also_see	01097960
07248507	_derivationally_related_form	00976487
02665803	_derivationally_related_form	06037666
00786458	_derivationally_related_form	07197021
07044917	_hypernym	07037465
00975036	_verb_group	00783523
00666886	_derivationally_related_form	00075515
06713930	_derivationally_related_form	00824767
01770501	_derivationally_related_form	07524242
14442933	_hypernym	14441825
02382087	_derivationally_related_form	00548173
05600637	_has_part	05603160
06750804	_hypernym	06722453
05978812	_derivationally_related_form	00383275
01295275	_derivationally_related_form	00145218
00679389	_derivationally_related_form	00161243
07232655	_hypernym	07232421
01133281	_hypernym	01123598
00931555	_also_see	00064479
14818238	_synset_domain_topic_of	06084469
00474492	_derivationally_related_form	10514784
00329031	_derivationally_related_form	01888295
01744611	_derivationally_related_form	06589574
04682018	_derivationally_related_form	01695567
02354537	_derivationally_related_form	00895304
07647870	_hypernym	07578363
00621476	_hypernym	00620752
00021265	_hypernym	00020090
00180413	_derivationally_related_form	00797697
02077656	_also_see	01974062
04892084	_derivationally_related_form	00648977
01810447	_derivationally_related_form	01627965
03318438	_derivationally_related_form	00838043
01201856	_derivationally_related_form	00839778
10507070	_derivationally_related_form	01051956
02399331	_also_see	02482425
01466978	_derivationally_related_form	03265479
00646738	_derivationally_related_form	01005579
04782878	_hypernym	04723816
01275762	_derivationally_related_form	06798750
02291843	_also_see	01755627
00084738	_derivationally_related_form	03247620
01140839	_derivationally_related_form	02589013
06729499	_derivationally_related_form	01011031
03294833	_derivationally_related_form	00999815
09773245	_derivationally_related_form	02378623
09875786	_hypernym	09610660
01934205	_hypernym	01931768
04110439	_synset_domain_topic_of	06128570
02180529	_derivationally_related_form	05718254
00685638	_derivationally_related_form	04863969
02434238	_hypernym	02434976
03065685	_derivationally_related_form	14854262
05546540	_has_part	05341920
09225146	_hypernym	00002452
03295140	_hypernym	04341686
09909760	_hypernym	10004804
07039238	_derivationally_related_form	01727490
04250850	_derivationally_related_form	00001740
13467916	_derivationally_related_form	00355955
10442417	_derivationally_related_form	01921204
00922327	_derivationally_related_form	01163620
01276361	_derivationally_related_form	00263813
00372448	_derivationally_related_form	01575675
14031108	_synset_domain_topic_of	08199025
08198398	_hypernym	08189659
01038666	_hypernym	00964694
10207831	_derivationally_related_form	00784727
02600490	_derivationally_related_form	00418903
14920388	_hypernym	14818238
07172756	_hypernym	07138085
01315613	_derivationally_related_form	10567401
00180413	_derivationally_related_form	00719231
02419773	_derivationally_related_form	10684630
05220461	_hypernym	09385911
05068080	_derivationally_related_form	02038791
10596689	_derivationally_related_form	01843055
08512259	_derivationally_related_form	00233335
06290637	_hypernym	06286395
01664172	_derivationally_related_form	00243918
00374063	_derivationally_related_form	00220869
14415518	_derivationally_related_form	00494269
02002720	_verb_group	02056466
10339966	_derivationally_related_form	05718935
00868910	_derivationally_related_form	00926472
01045419	_hypernym	00983824
01843364	_hypernym	01843055
01177118	_derivationally_related_form	07565259
02432530	_derivationally_related_form	08164585
11415084	_derivationally_related_form	02661252
08418103	_derivationally_related_form	00158804
01018630	_derivationally_related_form	00958334
14050143	_derivationally_related_form	00559102
00527572	_hypernym	00212414
13986372	_derivationally_related_form	01812720
02128066	_derivationally_related_form	00043195
01276361	_derivationally_related_form	13905792
05641959	_hypernym	05640433
01699539	_derivationally_related_form	06399995
01719302	_derivationally_related_form	07007945
11690893	_hypernym	13152742
08368907	_hypernym	07941170
10533013	_derivationally_related_form	01072262
00096343	_hypernym	00093483
07965085	_hypernym	07950920
13980288	_derivationally_related_form	09773245
06733227	_hypernym	06725877
04320126	_derivationally_related_form	00022686
00765649	_derivationally_related_form	05195362
00604576	_derivationally_related_form	05651399
01372049	_also_see	01133876
04362025	_hypernym	00021939
02469274	_derivationally_related_form	00377169
07374756	_derivationally_related_form	01418667
02690384	_hypernym	02620587
01987160	_derivationally_related_form	04110439
10661563	_hypernym	10438172
01162754	_verb_group	02116980
02443609	_derivationally_related_form	10468559
01992503	_derivationally_related_form	07445265
07193596	_derivationally_related_form	00785008
08103777	_synset_domain_topic_of	06037666
00347420	_hypernym	00345761
00983824	_derivationally_related_form	07109847
01070187	_derivationally_related_form	10012484
00045250	_derivationally_related_form	01643657
02518990	_member_meronym	02519148
02609764	_derivationally_related_form	08565894
10541229	_derivationally_related_form	00599234
00797697	_hypernym	00717358
10001058	_derivationally_related_form	02293321
10700517	_hypernym	10523519
06410391	_derivationally_related_form	00855512
01206218	_derivationally_related_form	00046522
02582042	_derivationally_related_form	01186810
06355307	_derivationally_related_form	00994076
13480667	_derivationally_related_form	01457954
07202812	_derivationally_related_form	01021973
10468962	_hypernym	10469346
00723056	_hypernym	00722232
00721437	_derivationally_related_form	05808218
01498872	_derivationally_related_form	04061969
01976089	_hypernym	01974062
00813044	_derivationally_related_form	05785067
00976487	_derivationally_related_form	07248507
07173959	_derivationally_related_form	00932798
00123170	_derivationally_related_form	05840650
01803936	_derivationally_related_form	00158185
02106006	_derivationally_related_form	04946553
10140314	_hypernym	10451263
05395690	_has_part	05367912
00948071	_derivationally_related_form	03116767
10269785	_derivationally_related_form	05664069
07365193	_derivationally_related_form	02523521
00618682	_derivationally_related_form	05840188
00834198	_also_see	00839619
00695475	_derivationally_related_form	06528992
01127075	_hypernym	01476483
01818835	_derivationally_related_form	07252378
08324514	_member_meronym	09944022
03775199	_hypernym	03621049
01593254	_hypernym	01346003
00428000	_derivationally_related_form	02490877
00828374	_hypernym	00827730
11458624	_derivationally_related_form	01350449
00949134	_hypernym	00947128
02635794	_derivationally_related_form	02475922
02620724	_derivationally_related_form	05761918
01137138	_derivationally_related_form	10593115
03004358	_derivationally_related_form	07154330
00886978	_derivationally_related_form	01040646
07203126	_derivationally_related_form	01009240
01077350	_derivationally_related_form	02450505
00869583	_hypernym	00868910
00155487	_derivationally_related_form	01711749
07467846	_derivationally_related_form	02486932
10067968	_derivationally_related_form	02131279
00074038	_derivationally_related_form	10000007
00677544	_hypernym	00674607
06018022	_hypernym	06000644
02348324	_derivationally_related_form	01165692
00993014	_derivationally_related_form	00614224
13413493	_derivationally_related_form	00681429
15143276	_derivationally_related_form	00358431
05808102	_hypernym	05807306
10345804	_derivationally_related_form	01009240
00939452	_hypernym	00927261
02991302	_derivationally_related_form	02685299
00215314	_derivationally_related_form	02431320
09629065	_hypernym	09628382
02981759	_derivationally_related_form	06786629
01048912	_hypernym	00407535
14480772	_hypernym	14479615
02153709	_derivationally_related_form	00945401
15266265	_derivationally_related_form	00597265
00205885	_hypernym	00126264
05125377	_derivationally_related_form	02727039
06681551	_derivationally_related_form	00967098
09614684	_derivationally_related_form	01130169
07359599	_hypernym	07296428
07238694	_hypernym	07160883
08622950	_derivationally_related_form	02694933
10708454	_derivationally_related_form	00628491
00965035	_derivationally_related_form	07217924
03125057	_hypernym	03033986
00996485	_also_see	02343816
03211117	_has_part	04054795
10521470	_derivationally_related_form	02595662
04689198	_derivationally_related_form	00567291
02066939	_derivationally_related_form	09415938
02329733	_hypernym	02327200
02549581	_hypernym	02550296
00956687	_hypernym	00609683
01407904	_hypernym	01405044
01455184	_derivationally_related_form	04231693
00230172	_hypernym	00209943
00897746	_verb_group	00784342
10355449	_hypernym	10363913
09938672	_derivationally_related_form	14984973
01646866	_derivationally_related_form	09184975
00817680	_hypernym	00407535
01870867	_hypernym	01870275
04599396	_derivationally_related_form	02525447
01069391	_derivationally_related_form	00145218
00730301	_hypernym	00235368
02958343	_derivationally_related_form	10279018
03304730	_hypernym	14806838
03932203	_derivationally_related_form	01656788
05917477	_derivationally_related_form	01642924
08198137	_hypernym	08208016
00877083	_hypernym	00877327
05269901	_derivationally_related_form	05277728
14877585	_derivationally_related_form	00442267
10425946	_derivationally_related_form	06158346
02011810	_derivationally_related_form	06207561
05650329	_hypernym	05616246
07175241	_derivationally_related_form	00805376
02453692	_derivationally_related_form	05178715
06481320	_derivationally_related_form	02472223
00661824	_derivationally_related_form	09912995
00752431	_derivationally_related_form	02575082
01793177	_derivationally_related_form	00908672
06893885	_derivationally_related_form	01719302
02581073	_hypernym	02536557
05985999	_derivationally_related_form	10557854
00907930	_derivationally_related_form	10776339
00991900	_hypernym	00991683
01247804	_derivationally_related_form	00125436
08656590	_derivationally_related_form	01088923
15271008	_derivationally_related_form	00363493
15226214	_has_part	15226732
00978549	_derivationally_related_form	02643446
09915964	_hypernym	09612848
02713097	_hypernym	02887970
00880662	_derivationally_related_form	02150510
01018928	_hypernym	00888786
00503237	_has_part	03011521
05951323	_hypernym	05944958
05149325	_derivationally_related_form	02670890
10597234	_derivationally_related_form	00996485
01619929	_derivationally_related_form	00217014
04054795	_has_part	03952277
00165178	_derivationally_related_form	02391803
01740608	_derivationally_related_form	09260907
00962447	_derivationally_related_form	07135734
01731031	_verb_group	01067816
00374063	_hypernym	00363260
00716945	_hypernym	00712225
01744611	_hypernym	01697816
00923995	_derivationally_related_form	01632411
09952539	_derivationally_related_form	01733213
01091427	_hypernym	01090335
02498320	_hypernym	00752764
02736778	_derivationally_related_form	00900726
01644050	_derivationally_related_form	00238527
02067689	_derivationally_related_form	00329227
00835903	_derivationally_related_form	07434102
06490887	_derivationally_related_form	00946105
00337210	_derivationally_related_form	01864634
00831191	_derivationally_related_form	00779360
00706243	_hypernym	00704690
00046534	_verb_group	00044797
13582013	_derivationally_related_form	00946755
02523521	_verb_group	02522319
10623354	_derivationally_related_form	02458747
13368052	_derivationally_related_form	00724150
05651242	_hypernym	00023271
00387310	_derivationally_related_form	00068333
03875218	_derivationally_related_form	01684899
01332730	_derivationally_related_form	04151940
08160276	_member_meronym	09923673
01986869	_verb_group	01989873
00381601	_hypernym	00109660
00211110	_derivationally_related_form	02425913
03018498	_derivationally_related_form	08378356
02367363	_derivationally_related_form	14006945
00158804	_hypernym	00156601
05547508	_has_part	05301072
00022316	_hypernym	00019448
05594367	_hypernym	05594037
03432129	_hypernym	03736970
01632411	_derivationally_related_form	00923995
05926676	_hypernym	05809192
13920835	_hypernym	00024720
00387657	_hypernym	00383390
05967977	_hypernym	05952490
10076957	_derivationally_related_form	02576921
00604617	_also_see	00931555
02015598	_derivationally_related_form	00053097
02395395	_derivationally_related_form	01140839
10516692	_derivationally_related_form	02471690
07524242	_hypernym	07523905
09958892	_hypernym	09977660
03076708	_hypernym	00021939
10007109	_derivationally_related_form	00614057
00140652	_derivationally_related_form	01210737
10776339	_derivationally_related_form	00910973
01721169	_synset_domain_topic_of	07006119
00954422	_also_see	02193194
00664276	_hypernym	00820976
10395605	_derivationally_related_form	06413889
01380122	_derivationally_related_form	05088324
14840092	_hypernym	14580897
09632518	_derivationally_related_form	02410855
01645601	_hypernym	01617192
01789514	_derivationally_related_form	00419644
10716005	_derivationally_related_form	01803003
02034300	_derivationally_related_form	00350380
02874282	_derivationally_related_form	07050177
01256743	_hypernym	01256417
09941571	_derivationally_related_form	02441022
01921204	_derivationally_related_form	10442417
00250710	_hypernym	00250259
00948071	_derivationally_related_form	09969491
02149302	_derivationally_related_form	06709692
04019696	_hypernym	03183080
01803003	_derivationally_related_form	00422551
01226240	_also_see	01548193
01061017	_hypernym	00740577
05770926	_derivationally_related_form	00608808
01182709	_derivationally_related_form	01057200
06602148	_hypernym	06601327
00171586	_hypernym	00205885
05823054	_derivationally_related_form	00896141
07168131	_hypernym	07160883
04552696	_synset_domain_topic_of	08199025
08680888	_derivationally_related_form	01931768
02981759	_derivationally_related_form	00887081
01210352	_synset_domain_topic_of	00612160
00859001	_hypernym	13440063
05560244	_has_part	05566919
04754440	_derivationally_related_form	00550282
14491271	_hypernym	14488317
01912159	_derivationally_related_form	00296946
01139623	_hypernym	01139104
02406916	_hypernym	02407338
02531625	_derivationally_related_form	05787005
02337364	_hypernym	02327200
01128193	_derivationally_related_form	09614684
08186047	_derivationally_related_form	02541251
05125377	_derivationally_related_form	02992070
05068461	_derivationally_related_form	02037090
03614007	_hypernym	03183080
02021532	_hypernym	02020590
00953216	_derivationally_related_form	07220773
05216365	_has_part	05303402
08622950	_hypernym	08621598
02319050	_hypernym	02573275
02669081	_derivationally_related_form	13940456
00341285	_derivationally_related_form	05701363
02426171	_derivationally_related_form	00239230
00242583	_derivationally_related_form	02434238
10597234	_hypernym	00007846
02465939	_hypernym	02402825
07252206	_hypernym	06691442
01659248	_derivationally_related_form	10284064
01999798	_derivationally_related_form	09623038
00375625	_derivationally_related_form	00314782
10538272	_hypernym	09974648
00948071	_derivationally_related_form	03117199
00479391	_hypernym	01323958
09848489	_derivationally_related_form	00721098
07345593	_synset_domain_topic_of	06090869
07445896	_derivationally_related_form	01380122
00953216	_derivationally_related_form	07221756
03701640	_derivationally_related_form	01623967
00882159	_hypernym	00876874
01457954	_derivationally_related_form	13480667
09812338	_derivationally_related_form	02743547
05784242	_derivationally_related_form	02166460
01719302	_verb_group	01719921
05697135	_hypernym	05669934
13792692	_derivationally_related_form	01492052
03335030	_synset_domain_topic_of	08199025
05650820	_derivationally_related_form	00963570
06634376	_hypernym	06598915
07331400	_hypernym	07296428
03008275	_derivationally_related_form	00306017
15153472	_hypernym	15144371
04143365	_hypernym	04515129
02676054	_derivationally_related_form	13795180
06712833	_hypernym	06711855
05083328	_hypernym	05075602
02448185	_derivationally_related_form	00237078
00105624	_derivationally_related_form	02038357
01817500	_also_see	02354537
01503061	_has_part	02511633
07007945	_derivationally_related_form	10030277
00739340	_verb_group	00739082
00163779	_hypernym	00162632
01970826	_also_see	01989053
00634906	_hypernym	00588888
02418421	_derivationally_related_form	00511817
04836683	_derivationally_related_form	00765977
00368109	_derivationally_related_form	13810323
00636921	_hypernym	00633864
10207831	_derivationally_related_form	00897746
01558440	_hypernym	01557774
05624700	_hypernym	05616246
06818747	_hypernym	06817782
01011031	_derivationally_related_form	06732350
00680841	_hypernym	00701040
10069296	_hypernym	10415638
00930868	_hypernym	00929718
03733925	_hypernym	03574816
09855630	_derivationally_related_form	06037298
00190115	_also_see	00570590
01325774	_derivationally_related_form	00219012
00048633	_hypernym	00047945
07151892	_hypernym	07151380
00343334	_hypernym	00339934
09824361	_hypernym	09617867
02456031	_derivationally_related_form	00730538
10729175	_synset_domain_topic_of	08441203
10724699	_derivationally_related_form	01435380
04453910	_hypernym	03122748
01628449	_derivationally_related_form	00643250
10034906	_derivationally_related_form	02056971
01698271	_derivationally_related_form	10794014
00955060	_derivationally_related_form	01109863
07217924	_hypernym	07212190
08310389	_derivationally_related_form	02428924
05388805	_hypernym	05298729
00506658	_hypernym	00430140
04773596	_derivationally_related_form	02994448
05926676	_derivationally_related_form	00772967
00116376	_derivationally_related_form	01455866
09887034	_derivationally_related_form	00712135
01640855	_verb_group	00486018
01651293	_hypernym	01641914
00839778	_derivationally_related_form	01201856
01435380	_derivationally_related_form	10724699
04820258	_derivationally_related_form	00939857
07296428	_derivationally_related_form	00126264
07413899	_derivationally_related_form	00237511
14598079	_synset_domain_topic_of	06090869
09812338	_hypernym	09614315
01301410	_hypernym	00512186
15283097	_hypernym	15286249
00811355	_hypernym	00810598
02487573	_derivationally_related_form	10757193
02034986	_derivationally_related_form	13874384
00037457	_synset_domain_topic_of	06060845
00702601	_hypernym	00701040
00598954	_verb_group	02128873
00165942	_hypernym	00162632
00068333	_derivationally_related_form	00093327
05171045	_derivationally_related_form	00055539
10334957	_derivationally_related_form	01921964
01130607	_hypernym	01128193
01184625	_derivationally_related_form	01216191
07992450	_hypernym	07941170
00381013	_derivationally_related_form	03099945
13791389	_derivationally_related_form	02568884
00112628	_derivationally_related_form	13565379
01166093	_hypernym	01158872
00592102	_hypernym	00586262
01118449	_derivationally_related_form	09821253
07357388	_derivationally_related_form	00248659
02342132	_verb_group	02752931
07445265	_hypernym	07311115
06559365	_synset_domain_topic_of	08441203
02648253	_hypernym	02679899
00054628	_derivationally_related_form	10080869
07644382	_has_part	07647870
10785695	_hypernym	00007846
06468123	_hypernym	06467007
07018931	_derivationally_related_form	01716619
09625401	_derivationally_related_form	02496816
05211044	_hypernym	04723816
02450256	_hypernym	02367363
00494907	_derivationally_related_form	01070102
02493030	_derivationally_related_form	10757193
00031264	_derivationally_related_form	00656576
02153387	_derivationally_related_form	10565302
10060352	_derivationally_related_form	08056231
13905405	_hypernym	13904843
00607780	_derivationally_related_form	05761918
01109863	_derivationally_related_form	00955060
10599806	_derivationally_related_form	01729431
03055809	_derivationally_related_form	00611481
06516955	_derivationally_related_form	02265231
00905852	_hypernym	00903385
00662182	_verb_group	00661824
01782432	_derivationally_related_form	10240082
01588493	_hypernym	01296462
00548326	_derivationally_related_form	01714208
06818747	_derivationally_related_form	00662182
13457378	_derivationally_related_form	00431826
05686955	_hypernym	05686481
01742726	_synset_domain_topic_of	00916464
01040646	_synset_domain_topic_of	05946687
01583656	_hypernym	01582645
10027590	_derivationally_related_form	00854420
07423365	_derivationally_related_form	00146138
01644746	_hypernym	01617192
03706653	_derivationally_related_form	03209910
01019472	_verb_group	01018928
06427831	_synset_domain_topic_of	06364641
00863433	_derivationally_related_form	00133338
05567217	_derivationally_related_form	01209953
02699141	_hypernym	00836236
00201722	_verb_group	00243900
00917300	_hypernym	00927049
01133876	_derivationally_related_form	04631067
01698271	_also_see	01754576
00973056	_derivationally_related_form	09875786
00094460	_hypernym	00109660
06013741	_synset_domain_topic_of	06000644
00153263	_hypernym	00126264
01557614	_derivationally_related_form	00007846
01233993	_derivationally_related_form	04105068
01181902	_synset_domain_topic_of	08441203
10068234	_hypernym	10207831
03049457	_hypernym	04105893
06797671	_derivationally_related_form	00921300
01461328	_derivationally_related_form	07373803
00810598	_derivationally_related_form	02283324
06174404	_synset_domain_topic_of	06172789
03696065	_hypernym	03079741
02796412	_hypernym	02796623
05051896	_derivationally_related_form	02747709
01241767	_derivationally_related_form	00896803
09184975	_derivationally_related_form	01646866
02550868	_derivationally_related_form	00096343
13541167	_derivationally_related_form	00515154
10261041	_derivationally_related_form	13961642
05701363	_derivationally_related_form	00341285
10717589	_derivationally_related_form	01206849
00715239	_derivationally_related_form	05677340
01051082	_derivationally_related_form	01888295
01207951	_derivationally_related_form	02840619
01127075	_derivationally_related_form	02796412
01624169	_derivationally_related_form	10279018
01789514	_derivationally_related_form	10209246
01661804	_derivationally_related_form	07335097
02448185	_derivationally_related_form	01136519
06771653	_hypernym	06479665
01449974	_derivationally_related_form	09897696
05194043	_hypernym	05190804
13911151	_hypernym	13870805
00960961	_hypernym	00959827
01448100	_also_see	01661804
02469274	_hypernym	02467662
06776138	_hypernym	06598915
00696700	_derivationally_related_form	00644503
10603528	_derivationally_related_form	02640440
01845720	_derivationally_related_form	09629752
05922949	_derivationally_related_form	02676054
00899292	_hypernym	00898518
00885082	_hypernym	00885217
01744111	_derivationally_related_form	05710210
01649999	_hypernym	01645601
08293982	_derivationally_related_form	00733632
01564144	_derivationally_related_form	10008716
01478002	_derivationally_related_form	00562398
00717358	_derivationally_related_form	10524413
00900726	_hypernym	00900375
00751529	_derivationally_related_form	00835903
05785311	_derivationally_related_form	00649481
10383237	_derivationally_related_form	01463963
00921790	_derivationally_related_form	01320009
00692329	_derivationally_related_form	05854150
10284064	_derivationally_related_form	01621555
06726158	_derivationally_related_form	00965871
13844212	_derivationally_related_form	02724417
04677514	_hypernym	04673965
00119524	_derivationally_related_form	04748836
05546540	_has_part	05590366
00091013	_derivationally_related_form	02228031
01539063	_derivationally_related_form	10034201
00965871	_derivationally_related_form	00686890
01241331	_derivationally_related_form	00904690
05459232	_hypernym	05430628
04683814	_derivationally_related_form	09845999
11447851	_hypernym	11458624
02154508	_derivationally_related_form	01002956
10554455	_hypernym	09632518
14854581	_derivationally_related_form	00841986
00474492	_derivationally_related_form	13547199
15266265	_derivationally_related_form	10468962
02294179	_derivationally_related_form	10401639
00900726	_derivationally_related_form	01582645
07272545	_hypernym	07272172
00375071	_derivationally_related_form	00244625
03894379	_derivationally_related_form	00332835
01084637	_hypernym	01083645
06589574	_has_part	06780678
00819508	_derivationally_related_form	07216083
00590626	_derivationally_related_form	09941383
01209678	_verb_group	02127613
00153263	_derivationally_related_form	00363260
00006336	_derivationally_related_form	04940964
10771392	_derivationally_related_form	01845720
02260362	_derivationally_related_form	10720453
10524973	_hypernym	00007846
00205543	_hypernym	00205079
02348927	_derivationally_related_form	03540595
02634265	_derivationally_related_form	11410625
01009240	_derivationally_related_form	07203126
00820611	_verb_group	00820352
00704690	_derivationally_related_form	05728678
00525446	_derivationally_related_form	01030820
01638368	_derivationally_related_form	00795720
09773245	_derivationally_related_form	07548366
06817623	_hypernym	06806469
00612042	_hypernym	00610538
01850315	_derivationally_related_form	00280586
10525134	_derivationally_related_form	00233335
14562960	_derivationally_related_form	02609764
05549830	_has_part	05556204
09633969	_derivationally_related_form	02566528
02656763	_derivationally_related_form	04105893
05823054	_hypernym	05822746
05481095	_has_part	05502556
08101410	_hypernym	08101085
07220773	_derivationally_related_form	00954271
10415638	_derivationally_related_form	01714208
01206553	_hypernym	01206153
01157517	_hypernym	02267060
00841986	_derivationally_related_form	10206173
00780148	_hypernym	00769092
04673965	_derivationally_related_form	00422090
01134861	_hypernym	01133281
01739814	_derivationally_related_form	03322099
01438681	_hypernym	01438304
01195299	_derivationally_related_form	10728998
05461816	_hypernym	05237227
00625774	_derivationally_related_form	13960117
00815686	_derivationally_related_form	07199565
05124057	_derivationally_related_form	00947077
05558717	_hypernym	05220461
10252222	_hypernym	10045713
01651293	_derivationally_related_form	00795720
05656537	_derivationally_related_form	02129289
02034828	_also_see	01878466
02630189	_derivationally_related_form	05601758
07128946	_derivationally_related_form	00978549
01426153	_verb_group	01426397
01209678	_derivationally_related_form	04946553
01091905	_derivationally_related_form	02260362
02014165	_also_see	02345647
02577877	_hypernym	00782527
00820611	_derivationally_related_form	06649915
01072949	_derivationally_related_form	00041188
05194578	_derivationally_related_form	00747418
00377364	_derivationally_related_form	00306017
00015388	_hypernym	00004475
02650840	_hypernym	02649830
00773432	_derivationally_related_form	07140978
00173764	_also_see	01746605
07296428	_derivationally_related_form	00109660
00581812	_derivationally_related_form	02193194
00662589	_verb_group	00663353
00506299	_also_see	01507134
00612160	_derivationally_related_form	02760116
00745187	_derivationally_related_form	07110615
02448185	_derivationally_related_form	08426461
05250659	_hypernym	05248181
00811375	_derivationally_related_form	00203753
01688256	_synset_domain_topic_of	00933420
10541229	_hypernym	00007846
14037011	_derivationally_related_form	02116118
07071483	_hypernym	07066659
00115803	_hypernym	00114431
01015866	_derivationally_related_form	06763681
01512259	_hypernym	01511706
00064479	_also_see	01660994
01229938	_derivationally_related_form	02428924
04781349	_derivationally_related_form	00170156
01006675	_derivationally_related_form	01112584
05906554	_hypernym	05905802
09465459	_has_part	09385911
00896497	_hypernym	01012073
10045454	_derivationally_related_form	00611433
05551318	_synset_domain_topic_of	00015388
05767733	_derivationally_related_form	01635432
00732552	_derivationally_related_form	06767035
00621058	_hypernym	00939857
00219012	_hypernym	00209943
02600490	_derivationally_related_form	00158185
01860795	_derivationally_related_form	07365849
00387310	_derivationally_related_form	00235208
02644050	_derivationally_related_form	07311661
01539063	_derivationally_related_form	00842692
00713818	_hypernym	00713167
10575787	_derivationally_related_form	02153709
04613158	_hypernym	03091374
01796346	_derivationally_related_form	07528470
02996605	_derivationally_related_form	05309725
10794014	_derivationally_related_form	01744611
00055539	_synset_domain_topic_of	06037666
05793000	_hypernym	05770926
[truncated: 13,262 more rows]
