# Supplementary material
Source: ML conference proceedings conference paper supplement (https://proceedings.neurips.cc/paper_files/paper/2021/hash/0fd600c953cde8121262e322ef09f70e-Abstract.html)
Supplement: Supplementary file 1 [file 0fd600c953cde8121262e322ef09f70e-Supplemental.zip › Supplementary_Material_Paper_8745/data/GraIL-BM_WN18RR_v2/train/valid.txt]

04981139	_derivationally_related_form	02135048
06364149	_derivationally_related_form	01700934
04692157	_derivationally_related_form	01549905
01933900	_derivationally_related_form	05250659
00004605	_derivationally_related_form	14842091
00795785	_derivationally_related_form	02744977
01035530	_derivationally_related_form	07175241
00780575	_similar_to	00779374
14586258	_derivationally_related_form	00394813
02383440	_hypernym	00109660
02400378	_derivationally_related_form	10564224
08081403	_hypernym	08208560
00203342	_derivationally_related_form	00807178
00144314	_derivationally_related_form	09442838
00785690	_derivationally_related_form	10642151
02402825	_hypernym	02404224
02586458	_hypernym	02441022
01569566	_hypernym	01494310
01000214	_derivationally_related_form	06647206
02724417	_verb_group	00713818
05111835	_hypernym	05109808
14598079	_derivationally_related_form	01539063
00948071	_derivationally_related_form	09904057
02733122	_hypernym	01128193
07066659	_synset_domain_topic_of	00933420
09949946	_hypernym	10475297
02789271	_hypernym	03839993
00969873	_derivationally_related_form	07445896
09779790	_derivationally_related_form	01739814
01206218	_derivationally_related_form	10717589
02147603	_derivationally_related_form	01049475
01580050	_derivationally_related_form	14450691
04289027	_derivationally_related_form	01374767
07226545	_hypernym	06684383
05595083	_hypernym	05220461
00922438	_hypernym	00921738
00990812	_hypernym	01029852
10225219	_hypernym	10372373
08310389	_derivationally_related_form	02486932
02030158	_hypernym	01831531
01951480	_derivationally_related_form	00121166
01414288	_derivationally_related_form	07410021
03650173	_hypernym	00021939
02327200	_hypernym	02199590
00253761	_hypernym	00126264
00878136	_derivationally_related_form	07203126
01215392	_hypernym	01212519
02034986	_derivationally_related_form	05576573
13258362	_has_part	13285176
00430140	_hypernym	00747029
02267060	_derivationally_related_form	01122149
09801864	_derivationally_related_form	00588998
05563770	_hypernym	05560244
02391803	_derivationally_related_form	08402442
00281101	_derivationally_related_form	04695176
01014990	_derivationally_related_form	01380638
01865197	_derivationally_related_form	05147940
08132637	_synset_domain_topic_of	00883297
00732960	_also_see	01459422
01238640	_also_see	01412346
05802185	_derivationally_related_form	02265231
00909219	_derivationally_related_form	07211092
10729175	_derivationally_related_form	02500902
00914632	_derivationally_related_form	01622795
06387980	_hypernym	06365467
01253060	_derivationally_related_form	00105333
10349243	_derivationally_related_form	02558172
10611613	_derivationally_related_form	00785690
01182709	_hypernym	02199590
14010927	_derivationally_related_form	01861403
09610660	_derivationally_related_form	00740577
00258665	_verb_group	00434374
13485408	_derivationally_related_form	00056188
00050693	_derivationally_related_form	01990694
06757891	_derivationally_related_form	01634424
00467451	_derivationally_related_form	01237415
02573275	_hypernym	02574205
00940842	_hypernym	00927261
04152387	_derivationally_related_form	01130169
00695475	_derivationally_related_form	05804274
09913329	_hypernym	10633450
13549672	_derivationally_related_form	00104868
00052334	_hypernym	00048374
00607780	_derivationally_related_form	05833840
00356621	_derivationally_related_form	01157517
07270179	_derivationally_related_form	00651991
09798534	_derivationally_related_form	00894738
03005920	_derivationally_related_form	00109660
02161432	_also_see	01275562
00893955	_hypernym	00407535
00052500	_derivationally_related_form	01979901
02593001	_hypernym	02575082
01593254	_derivationally_related_form	03659292
02551144	_derivationally_related_form	00093483
05905802	_hypernym	05905348
00931555	_also_see	02495922
05068461	_hypernym	05074774
06376154	_derivationally_related_form	01701311
01170052	_derivationally_related_form	10034614
00125629	_derivationally_related_form	01236164
00444309	_derivationally_related_form	14480420
01369758	_also_see	00643473
01628449	_derivationally_related_form	00235435
05153520	_hypernym	05200169
15272029	_hypernym	15271008
07445896	_derivationally_related_form	00968211
00893741	_hypernym	00893435
01101913	_derivationally_related_form	01176219
10286539	_derivationally_related_form	00838043
01803380	_hypernym	01803003
01253060	_derivationally_related_form	00546192
10225219	_derivationally_related_form	08441203
10007109	_derivationally_related_form	02584097
05984584	_derivationally_related_form	01771535
00066901	_hypernym	00066636
04361095	_hypernym	04341686
13864153	_hypernym	13860793
00758627	_hypernym	00759269
00931852	_derivationally_related_form	05919866
00298161	_hypernym	01094725
00371314	_derivationally_related_form	00955601
07039238	_synset_domain_topic_of	07020895
10399299	_derivationally_related_form	00903385
01930874	_derivationally_related_form	10034906
07230502	_derivationally_related_form	01024190
02066939	_derivationally_related_form	07405893
05928513	_derivationally_related_form	00623151
02985137	_has_part	04152593
01560731	_derivationally_related_form	00359492
00367976	_hypernym	00367768
05054863	_derivationally_related_form	01755627
01198750	_derivationally_related_form	01068380
01690294	_hypernym	01686132
01632411	_derivationally_related_form	00940709
10042690	_hypernym	10165448
13559782	_derivationally_related_form	00119266
00791078	_derivationally_related_form	00539110
02608347	_derivationally_related_form	07325190
09792237	_hypernym	09617867
10151570	_derivationally_related_form	01931768
01566185	_derivationally_related_form	00217773
13508651	_derivationally_related_form	00443984
06349220	_has_part	06256229
02806261	_derivationally_related_form	00665886
05123416	_derivationally_related_form	02685951
01054545	_derivationally_related_form	02649830
15255804	_hypernym	05867413
13864153	_derivationally_related_form	00537339
10450303	_hypernym	09623038
00802318	_verb_group	02255462
00918820	_derivationally_related_form	01740608
01653873	_derivationally_related_form	00923995
00290740	_derivationally_related_form	09476521
10178216	_hypernym	10335931
05088324	_derivationally_related_form	02030424
00556193	_hypernym	00193486
01719302	_synset_domain_topic_of	06157326
01177118	_derivationally_related_form	09862345
01500873	_derivationally_related_form	13135832
09608002	_hypernym	10401829
10383505	_derivationally_related_form	00710005
01967104	_hypernym	01963942
06417598	_derivationally_related_form	00877083
10401829	_hypernym	09816771
00325110	_derivationally_related_form	01921964
07220773	_has_part	06396930
05651680	_derivationally_related_form	00772189
10754281	_derivationally_related_form	02567519
02730471	_hypernym	02133435
00435853	_hypernym	00140967
09938672	_derivationally_related_form	01696648
01642437	_derivationally_related_form	10434725
00004605	_derivationally_related_form	15109745
10008716	_hypernym	09831962
02752695	_derivationally_related_form	06467445
15274863	_derivationally_related_form	02208537
06324475	_hypernym	06291318
10309347	_derivationally_related_form	01024190
01484392	_derivationally_related_form	08008017
08647616	_derivationally_related_form	01543998
00956687	_derivationally_related_form	07201804
01883716	_derivationally_related_form	00429322
01054335	_derivationally_related_form	10700517
10285762	_hypernym	09633969
03327234	_hypernym	02796623
02420232	_hypernym	02410855
05217168	_derivationally_related_form	09792237
09882716	_hypernym	09609232
02535716	_derivationally_related_form	15271008
02698944	_derivationally_related_form	05217859
09605289	_derivationally_related_form	15152817
01654628	_verb_group	01685601
02460619	_derivationally_related_form	06523132
02014165	_derivationally_related_form	07375635
02347637	_derivationally_related_form	09909760
05816287	_derivationally_related_form	00831651
00007846	_hypernym	00007347
02649830	_derivationally_related_form	10268180
01131473	_derivationally_related_form	01147451
02465414	_hypernym	05297523
02262139	_derivationally_related_form	06471345
01834304	_also_see	00013160
02357072	_derivationally_related_form	07199922
02680814	_derivationally_related_form	15268239
07410021	_derivationally_related_form	01410223
02147109	_derivationally_related_form	04151940
00887081	_derivationally_related_form	02945971
01764171	_derivationally_related_form	04904996
01236164	_verb_group	01410223
02608823	_derivationally_related_form	00235435
00044797	_verb_group	00046534
07548366	_hypernym	07547805
01755504	_verb_group	00276068
00013615	_hypernym	00010435
01278427	_derivationally_related_form	13905792
00045250	_hypernym	00030358
02551832	_derivationally_related_form	10553805
07370270	_hypernym	07311115
07365849	_derivationally_related_form	02559752
04802403	_hypernym	04723816
01033527	_verb_group	02514187
06313457	_hypernym	07013736
00900616	_derivationally_related_form	05171045
01054335	_derivationally_related_form	10523519
01835496	_also_see	01921964
01675963	_hypernym	00126264
06733227	_synset_domain_topic_of	06163751
02428924	_derivationally_related_form	01229938
08292756	_hypernym	07951464
02420232	_derivationally_related_form	03322099
00989602	_derivationally_related_form	07167415
06532095	_hypernym	06479665
02555434	_derivationally_related_form	09815790
01921964	_derivationally_related_form	09206985
00329031	_derivationally_related_form	02234781
06793426	_derivationally_related_form	01570403
00674607	_derivationally_related_form	00161243
01369346	_derivationally_related_form	00708017
13896369	_hypernym	13864965
02434238	_derivationally_related_form	10383505
02466670	_derivationally_related_form	10253995
01356750	_derivationally_related_form	04689198
10718131	_hypernym	09629752
00193486	_derivationally_related_form	00378985
06170498	_derivationally_related_form	10380672
10402824	_hypernym	00007846
02577061	_also_see	02056880
00310201	_derivationally_related_form	10596689
00927049	_derivationally_related_form	10634316
02574516	_hypernym	02575082
00093327	_hypernym	00387310
07524529	_derivationally_related_form	02678438
09761403	_derivationally_related_form	02265231
06362953	_hypernym	06349220
01230710	_derivationally_related_form	07252378
05547508	_has_part	05305136
06013741	_hypernym	06003682
00681429	_derivationally_related_form	09802239
08473482	_derivationally_related_form	10720964
02765464	_derivationally_related_form	00006336
00708980	_derivationally_related_form	04864200
01106808	_derivationally_related_form	02244956
13859043	_hypernym	00031921
03773035	_hypernym	04069276
00838098	_hypernym	13440063
06397903	_derivationally_related_form	00901799
02460502	_also_see	02179279
00090779	_derivationally_related_form	02308741
00716945	_derivationally_related_form	01484982
08402442	_derivationally_related_form	09944022
05712076	_hypernym	05708432
10646942	_derivationally_related_form	01921204
01083044	_derivationally_related_form	10502046
00709379	_derivationally_related_form	05981768
07961480	_derivationally_related_form	00158804
00368847	_hypernym	00367685
02662297	_derivationally_related_form	05864177
00873682	_hypernym	00831651
00889229	_derivationally_related_form	10597234
00173283	_hypernym	00172710
01635432	_derivationally_related_form	00899927
08673395	_hypernym	08574314
01484392	_derivationally_related_form	07959943
03099945	_hypernym	03183080
01072949	_derivationally_related_form	15256915
00734587	_derivationally_related_form	05854150
01372049	_derivationally_related_form	04840011
09963914	_hypernym	10383237
00082241	_derivationally_related_form	04837232
01935233	_hypernym	01995549
10008716	_derivationally_related_form	01566490
08672562	_derivationally_related_form	00413876
00907657	_hypernym	00907147
07386370	_derivationally_related_form	02178866
00374224	_derivationally_related_form	00290302
01884974	_derivationally_related_form	04596630
03008275	_hypernym	03304730
01189282	_hypernym	01189001
00153263	_derivationally_related_form	13754293
00410247	_hypernym	00407535
01101913	_derivationally_related_form	07476623
00644503	_derivationally_related_form	02166460
01964367	_derivationally_related_form	07099271
01714208	_hypernym	01619354
00235435	_derivationally_related_form	00345761
00824767	_derivationally_related_form	10561861
06428216	_derivationally_related_form	00200863
06410776	_derivationally_related_form	01058574
00946105	_derivationally_related_form	05817845
02554922	_derivationally_related_form	10677713
06387980	_has_part	06399995
00190999	_derivationally_related_form	14841267
00219012	_derivationally_related_form	01325536
10458111	_derivationally_related_form	00733044
01072949	_derivationally_related_form	00557588
04679738	_derivationally_related_form	00929362
06153186	_synset_domain_topic_of	06037666
01457954	_derivationally_related_form	13534274
00748515	_derivationally_related_form	01171183
02963821	_has_part	03521076
05564590	_derivationally_related_form	01211098
01711445	_derivationally_related_form	00521562
05123416	_derivationally_related_form	02687916
01511706	_derivationally_related_form	00045250
01619929	_derivationally_related_form	00737973
13809207	_hypernym	00031921
06128570	_synset_domain_topic_of	03082979
05702275	_hypernym	05701944
01644050	_hypernym	01627355
00444309	_derivationally_related_form	02850732
02413480	_derivationally_related_form	09632518
01160031	_also_see	02559180
05370918	_hypernym	05418717
10767519	_derivationally_related_form	02282365
02008066	_derivationally_related_form	13940456
00732552	_derivationally_related_form	01002956
06763681	_derivationally_related_form	01059123
00611972	_synset_domain_topic_of	06148148
06504462	_hypernym	06502378
02382087	_derivationally_related_form	01033458
00794367	_derivationally_related_form	01112584
00388635	_derivationally_related_form	14525548
02321757	_derivationally_related_form	00780889
01835496	_also_see	01970646
10792178	_derivationally_related_form	01767163
02475922	_derivationally_related_form	00829378
01638368	_derivationally_related_form	05728678
01207951	_derivationally_related_form	04151940
02372326	_hypernym	02367363
10066732	_derivationally_related_form	00593944
07361128	_derivationally_related_form	01989053
02566528	_derivationally_related_form	00770270
00033599	_derivationally_related_form	04674715
10575787	_derivationally_related_form	01315613
01740608	_derivationally_related_form	03146846
01632411	_derivationally_related_form	05633385
02883344	_derivationally_related_form	01485158
10341955	_derivationally_related_form	00292672
00380083	_derivationally_related_form	00556193
01158872	_derivationally_related_form	00947128
00849523	_derivationally_related_form	00055142
07197021	_derivationally_related_form	00786816
06732350	_hypernym	06729499
00244625	_derivationally_related_form	00375071
06467445	_derivationally_related_form	02752695
07320302	_hypernym	07296428
00047317	_hypernym	00050652
00125629	_derivationally_related_form	01410223
09821253	_derivationally_related_form	00862683
06582403	_hypernym	06566077
00818553	_hypernym	00817311
04526964	_derivationally_related_form	00581891
00203342	_derivationally_related_form	02237338
00038849	_hypernym	00040353
01048718	_hypernym	00983824
00521562	_derivationally_related_form	02148788
01629958	_derivationally_related_form	05978623
04620216	_has_part	04660536
06649915	_derivationally_related_form	00820611
05388805	_has_part	05395286
06387980	_has_part	06397903
05662532	_hypernym	05661996
01131197	_derivationally_related_form	00170156
01163620	_derivationally_related_form	03768346
00403334	_derivationally_related_form	00477941
06365467	_hypernym	06362953
09257949	_hypernym	00019128
05761918	_derivationally_related_form	00611481
05301908	_has_part	05302499
01264050	_hypernym	00037396
03391770	_hypernym	04361095
01921964	_hypernym	01968569
02582042	_derivationally_related_form	06556692
00003553	_derivationally_related_form	00050693
07050177	_hypernym	07020895
09939313	_derivationally_related_form	01092366
00555138	_derivationally_related_form	02550516
01151110	_hypernym	01987160
07307754	_hypernym	07283608
04760771	_derivationally_related_form	01778212
05786372	_derivationally_related_form	01637166
09184975	_derivationally_related_form	00851239
02390470	_hypernym	02449847
07220773	_hypernym	07217924
07245125	_hypernym	06252138
00847340	_hypernym	00844254
01021420	_derivationally_related_form	00162632
04551375	_hypernym	03304730
05941423	_derivationally_related_form	00683280
14412725	_hypernym	13932421
00583990	_also_see	02504131
13359572	_derivationally_related_form	02265979
01319874	_also_see	00923321
00017222	_derivationally_related_form	11531090
01871979	_also_see	02056466
01333082	_hypernym	01329186
07355491	_derivationally_related_form	00358431
05765159	_hypernym	05701944
02858231	_derivationally_related_form	06158346
02240881	_derivationally_related_form	10575787
00717748	_hypernym	00717208
01292885	_derivationally_related_form	09900981
00632236	_derivationally_related_form	00083260
00413876	_derivationally_related_form	08672562
01301410	_derivationally_related_form	13999663
00055142	_hypernym	01617192
00820611	_verb_group	00820976
01884974	_derivationally_related_form	07364700
01158572	_derivationally_related_form	13451804
13904843	_derivationally_related_form	01558883
11480930	_derivationally_related_form	02135048
00784533	_derivationally_related_form	01557774
00382635	_derivationally_related_form	00398704
00593944	_derivationally_related_form	10066732
09623038	_derivationally_related_form	02440244
01214265	_also_see	02569630
06589574	_has_part	06998748
03265479	_derivationally_related_form	01466978
07232655	_derivationally_related_form	00621058
01867295	_derivationally_related_form	05147940
02635659	_derivationally_related_form	07292694
01995211	_verb_group	01854132
10425946	_derivationally_related_form	05943300
00300537	_derivationally_related_form	04930307
10617193	_derivationally_related_form	00785690
02002720	_hypernym	01850315
05896733	_hypernym	05893653
00737884	_hypernym	00668099
14441825	_hypernym	13920835
07291312	_derivationally_related_form	01620854
00596807	_derivationally_related_form	10468750
10235549	_derivationally_related_form	13812607
00331950	_derivationally_related_form	01831531
06633363	_derivationally_related_form	01631830
00990812	_derivationally_related_form	09769345
07006951	_derivationally_related_form	02157100
07881800	_hypernym	00021265
04110439	_derivationally_related_form	01494310
00637259	_derivationally_related_form	02938886
00276068	_verb_group	01755504
02681795	_also_see	01116585
00751887	_derivationally_related_form	09941383
07072698	_has_part	07098193
01469263	_hypernym	01494310
02425913	_derivationally_related_form	00229260
01092366	_derivationally_related_form	00953559
06753299	_derivationally_related_form	00716758
00903385	_derivationally_related_form	10399299
01233993	_derivationally_related_form	10538272
10630188	_hypernym	09811712
09875786	_derivationally_related_form	00973056
13534274	_derivationally_related_form	01458228
06172502	_hypernym	05999797
00813978	_derivationally_related_form	07140659
15267536	_hypernym	15266911
00250710	_derivationally_related_form	00251463
03270165	_hypernym	03294048
06685198	_derivationally_related_form	02235842
01083077	_derivationally_related_form	01378556
10752480	_hypernym	00007846
01083504	_derivationally_related_form	00081072
01002956	_hypernym	00996969
02744651	_derivationally_related_form	03499142
00896803	_derivationally_related_form	05823054
01261490	_hypernym	00242808
01031705	_derivationally_related_form	10381369
01640855	_hypernym	00484166
06740402	_derivationally_related_form	01645601
01691057	_derivationally_related_form	10801291
00251064	_hypernym	00252019
04446521	_has_part	04447028
00205891	_derivationally_related_form	02303331
05828102	_derivationally_related_form	01762528
07976936	_derivationally_related_form	01428853
00719494	_hypernym	00575741
14286549	_derivationally_related_form	01250908
07232655	_derivationally_related_form	00939857
00654885	_derivationally_related_form	00082081
01921772	_derivationally_related_form	00622068
02776205	_derivationally_related_form	02577877
00633443	_hypernym	00719734
01318053	_derivationally_related_form	01887474
08110373	_hypernym	07992450
05480794	_hypernym	05237227
00988287	_derivationally_related_form	00899292
01236795	_derivationally_related_form	07389569
01782432	_derivationally_related_form	05951566
05566504	_derivationally_related_form	01209678
01332730	_verb_group	01207951
02419773	_derivationally_related_form	00621627
00636061	_hypernym	00634906
00707624	_derivationally_related_form	07176962
07214432	_derivationally_related_form	00721437
01582645	_derivationally_related_form	00938419
02129289	_verb_group	02150948
02301502	_derivationally_related_form	10635275
01138523	_derivationally_related_form	10118844
01998793	_hypernym	02020590
05830059	_derivationally_related_form	01792567
02459633	_hypernym	02459173
13792579	_derivationally_related_form	00713167
01049685	_derivationally_related_form	02148369
07250339	_hypernym	07248801
05309392	_hypernym	05389762
08612786	_derivationally_related_form	01276361
08565701	_derivationally_related_form	02710673
09469285	_synset_domain_topic_of	00015388
00211110	_derivationally_related_form	02610628
06289250	_hypernym	06286395
00900957	_derivationally_related_form	01688771
13354420	_hypernym	13329641
01311103	_derivationally_related_form	00941974
07139873	_hypernym	06252138
02115430	_derivationally_related_form	07510625
05216365	_has_part	05462315
01189001	_hypernym	01187810
02282506	_derivationally_related_form	00811355
00611481	_derivationally_related_form	03055809
08628921	_derivationally_related_form	02741149
07214994	_derivationally_related_form	00841986
00494907	_derivationally_related_form	00742320
02658283	_derivationally_related_form	00141806
01279978	_also_see	02164402
01563005	_derivationally_related_form	05867413
13870805	_hypernym	00027807
00701877	_derivationally_related_form	00684480
07371293	_hypernym	07283608
00217014	_derivationally_related_form	01619929
06741305	_derivationally_related_form	00893435
00235918	_derivationally_related_form	13582013
00631391	_also_see	01878466
03005423	_derivationally_related_form	07006119
00672277	_derivationally_related_form	00874067
00989602	_derivationally_related_form	07071483
02213074	_derivationally_related_form	00205649
02202384	_verb_group	02283716
02434238	_derivationally_related_form	00237078
09765278	_hypernym	10415638
00594146	_derivationally_related_form	07240549
05761559	_derivationally_related_form	00611055
08559155	_synset_domain_topic_of	08441203
02425913	_derivationally_related_form	15267536
00375625	_derivationally_related_form	00731789
00785690	_derivationally_related_form	10617193
01548290	_derivationally_related_form	03038281
00341285	_hypernym	00339934
05804274	_hypernym	05803379
05765415	_derivationally_related_form	02806907
14010636	_derivationally_related_form	00363493
02244956	_synset_domain_topic_of	01090446
04871720	_hypernym	04871374
01013040	_derivationally_related_form	06684572
00717208	_derivationally_related_form	06753800
02460483	_derivationally_related_form	10700517
00646738	_hypernym	00637259
00334186	_hypernym	00140123
01742886	_derivationally_related_form	03104594
04016240	_derivationally_related_form	01560731
06763681	_derivationally_related_form	01015866
00022686	_derivationally_related_form	14050143
00597634	_derivationally_related_form	05641959
06196584	_derivationally_related_form	00680841
10421470	_derivationally_related_form	06084469
05546040	_derivationally_related_form	01201089
00249501	_derivationally_related_form	00558371
00932798	_derivationally_related_form	07173959
01078783	_hypernym	01079480
01191975	_hypernym	01187810
01624169	_hypernym	01659248
07203126	_derivationally_related_form	00878136
01014821	_derivationally_related_form	10786270
09609871	_derivationally_related_form	00169806
03714721	_hypernym	00002684
01292885	_derivationally_related_form	07988857
00157957	_hypernym	00157081
01206153	_hypernym	01202904
13961642	_hypernym	13954253
00315986	_hypernym	00280586
01800349	_derivationally_related_form	07490713
00548173	_hypernym	00097504
10360101	_hypernym	10484526
08621598	_derivationally_related_form	01987160
01018630	_hypernym	01017987
03177349	_has_part	04328946
02671062	_hypernym	04564698
05600637	_has_part	05479314
02107248	_hypernym	02106506
02034986	_derivationally_related_form	14213328
02479990	_hypernym	02220461
00841986	_hypernym	00831651
01719921	_verb_group	01716619
04904996	_derivationally_related_form	01764171
00442267	_derivationally_related_form	15055633
07231294	_derivationally_related_form	00868591
00954422	_derivationally_related_form	06733939
15274863	_derivationally_related_form	02460619
05718254	_hypernym	05712076
00203753	_derivationally_related_form	00811375
05784242	_derivationally_related_form	00703512
04821802	_hypernym	04820258
01385458	_hypernym	01385170
00854420	_derivationally_related_form	09998101
00043195	_derivationally_related_form	00598954
14513259	_derivationally_related_form	02992070
00102586	_derivationally_related_form	00403092
10008716	_derivationally_related_form	01619929
02898711	_hypernym	04341686
11499284	_hypernym	11452218
04836683	_derivationally_related_form	02406916
13740168	_hypernym	13576982
09780828	_derivationally_related_form	02441022
02558172	_derivationally_related_form	07518663
00442669	_derivationally_related_form	13491060
01854132	_derivationally_related_form	00392093
13955461	_derivationally_related_form	10509389
06196284	_hypernym	06193203
06734467	_synset_domain_topic_of	08441203
00765649	_derivationally_related_form	07139700
05790572	_hypernym	05788149
07193184	_hypernym	07185325
10286539	_hypernym	10608385
05790242	_derivationally_related_form	00676450
02329578	_derivationally_related_form	08101410
07133701	_hypernym	07109196
01214265	_also_see	01572510
00915722	_derivationally_related_form	01742726
15145171	_derivationally_related_form	00248026
00464651	_hypernym	00463246
01030132	_derivationally_related_form	06338908
00746479	_derivationally_related_form	08567877
01693727	_synset_domain_topic_of	00933420
02235229	_hypernym	02200686
01142519	_hypernym	01133281
15274863	_derivationally_related_form	02460199
00055539	_synset_domain_topic_of	08441203
07363883	_derivationally_related_form	01989873
01020356	_hypernym	00993014
00546389	_derivationally_related_form	01731031
00550282	_derivationally_related_form	01021420
01988080	_hypernym	01494310
00858568	_hypernym	00860292
02060141	_derivationally_related_form	07445896
04662951	_hypernym	04616059
01428853	_derivationally_related_form	07988857
05088324	_derivationally_related_form	02028994
15265518	_derivationally_related_form	00345761
00892861	_hypernym	00887081
02237024	_derivationally_related_form	14875077
10670310	_derivationally_related_form	02299269
02556817	_derivationally_related_form	01213886
00841986	_derivationally_related_form	07214994
08679369	_derivationally_related_form	02621853
00586262	_derivationally_related_form	02385634
04531098	_hypernym	03094503
06199702	_derivationally_related_form	00699815
00849982	_derivationally_related_form	00055539
00228655	_hypernym	00214951
01921964	_also_see	01978576
07999699	_synset_domain_topic_of	06000644
01332730	_derivationally_related_form	02840619
10561861	_derivationally_related_form	00844941
00397760	_derivationally_related_form	01548718
02566528	_derivationally_related_form	10285762
01635176	_derivationally_related_form	06367107
00592795	_hypernym	00586262
01872877	_derivationally_related_form	00112312
01329239	_derivationally_related_form	04179385
04750164	_hypernym	04748836
00878136	_derivationally_related_form	06648724
00066191	_derivationally_related_form	10773040
07452841	_hypernym	07450842
05068080	_derivationally_related_form	02037090
04990220	_hypernym	04983122
01139865	_derivationally_related_form	01503061
09942970	_hypernym	10317007
09941964	_derivationally_related_form	02441022
02559752	_derivationally_related_form	01063697
09947232	_hypernym	10339966
09882007	_hypernym	09882716
08378356	_derivationally_related_form	10693824
00923995	_derivationally_related_form	01653873
02394662	_derivationally_related_form	00623670
07419233	_hypernym	07413899
00908351	_derivationally_related_form	01129532
00100543	_derivationally_related_form	01686132
06776138	_derivationally_related_form	10191943
01726172	_hypernym	02179518
07176962	_derivationally_related_form	00707956
02297742	_verb_group	02297948
05908520	_derivationally_related_form	00707956
10008716	_derivationally_related_form	02559199
13365698	_derivationally_related_form	02219094
09615807	_hypernym	00007846
00795632	_verb_group	02498320
13455487	_has_part	13477462
05733583	_derivationally_related_form	00681429
07180183	_hypernym	07175241
01986538	_member_meronym	01986806
06608728	_derivationally_related_form	00776846
00946588	_hypernym	00946755
09795334	_hypernym	09610660
02244956	_derivationally_related_form	01110274
00884540	_derivationally_related_form	07227772
01778990	_derivationally_related_form	09847727
13403643	_synset_domain_topic_of	08441203
01986869	_hypernym	01850315
00306723	_derivationally_related_form	00377686
08592656	_derivationally_related_form	00730301
05710210	_derivationally_related_form	02193194
01326291	_synset_domain_topic_of	00017222
09328904	_hypernym	09225146
02472293	_has_part	02463403
06797169	_hypernym	00033020
02185373	_derivationally_related_form	07386370
00622068	_derivationally_related_form	02407338
01177314	_hypernym	01176897
02518161	_derivationally_related_form	01220984
00067990	_hypernym	01073995
09609232	_synset_domain_topic_of	01094725
01423285	_derivationally_related_form	01074694
04933544	_derivationally_related_form	02620587
00355955	_hypernym	00352826
02603699	_derivationally_related_form	00043765
01149470	_derivationally_related_form	00430140
00617989	_derivationally_related_form	01233993
01719921	_derivationally_related_form	06892016
01643657	_derivationally_related_form	00156390
10693824	_derivationally_related_form	06153186
05981230	_derivationally_related_form	01150559
10544748	_derivationally_related_form	00350380
00920336	_derivationally_related_form	00151497
02529772	_hypernym	01428580
02449847	_derivationally_related_form	00373130
09997404	_derivationally_related_form	00773432
00882159	_derivationally_related_form	02169891
00752144	_derivationally_related_form	00835506
05432948	_has_part	05434557
08081403	_derivationally_related_form	01127795
10182499	_derivationally_related_form	08078020
00672277	_hypernym	00698855
03894379	_derivationally_related_form	02467662
01038666	_derivationally_related_form	10757193
00380568	_derivationally_related_form	00394813
06593099	_derivationally_related_form	00244625
05779712	_hypernym	05773923
01385170	_derivationally_related_form	07964495
10743675	_derivationally_related_form	00940384
06539178	_synset_domain_topic_of	08441203
01208291	_hypernym	01207609
13757249	_derivationally_related_form	01929254
01209678	_derivationally_related_form	02584915
01753596	_hypernym	01640207
00471613	_hypernym	00471437
02285629	_derivationally_related_form	10090498
11415084	_derivationally_related_form	02662297
01834304	_derivationally_related_form	00410247
01292885	_derivationally_related_form	07976936
00368302	_derivationally_related_form	00270005
01734502	_derivationally_related_form	10511425
00949288	_derivationally_related_form	02679142
09949946	_derivationally_related_form	01626138
01964367	_derivationally_related_form	07342049
02154508	_derivationally_related_form	03180969
02461723	_also_see	02180797
07547805	_derivationally_related_form	01244410
00004475	_derivationally_related_form	02614181
05653848	_hypernym	05652926
00065575	_hypernym	00063652
01363648	_derivationally_related_form	03691128
06711855	_derivationally_related_form	00824066
00544549	_hypernym	00126264
00237869	_synset_domain_topic_of	06182144
00198631	_derivationally_related_form	02400037
10580030	_synset_domain_topic_of	01032368
00872107	_hypernym	00872541
00681429	_derivationally_related_form	05138488
01435380	_derivationally_related_form	00121366
00515154	_derivationally_related_form	01134861
09786922	_hypernym	09882007
00625393	_also_see	00626800
03138344	_hypernym	03659292
01767163	_derivationally_related_form	07524242
00334186	_also_see	00209174
09385137	_derivationally_related_form	01552219
14451020	_hypernym	14450691
01835496	_also_see	02073714
00142191	_derivationally_related_form	05930736
08402442	_derivationally_related_form	10323182
00089351	_derivationally_related_form	02310007
05217688	_derivationally_related_form	02698944
08357784	_hypernym	08164585
01733213	_verb_group	01732921
09998101	_derivationally_related_form	02573275
02482425	_derivationally_related_form	00222248
01165692	_derivationally_related_form	02348324
00334996	_hypernym	02031158
01627965	_derivationally_related_form	04780958
00422551	_derivationally_related_form	00071178
01323449	_derivationally_related_form	00829107
14015731	_hypernym	00024720
05036394	_derivationally_related_form	00290302
01478002	_verb_group	02145543
13154077	_derivationally_related_form	13152742
10575787	_hypernym	00007846
09887034	_derivationally_related_form	01718952
01014066	_derivationally_related_form	01380638
06743230	_hypernym	06742932
04216634	_derivationally_related_form	01460029
00309792	_derivationally_related_form	07390400
07180570	_derivationally_related_form	01705257
03931044	_derivationally_related_form	01686956
00114837	_hypernym	00109660
02376429	_derivationally_related_form	01022008
00043195	_derivationally_related_form	00721437
00701040	_derivationally_related_form	05692419
01884577	_derivationally_related_form	04435870
01617192	_also_see	01634424
01719302	_derivationally_related_form	00795785
10034906	_derivationally_related_form	01930874
01240432	_hypernym	01240210
03547054	_derivationally_related_form	02650552
14403282	_hypernym	14403107
01009637	_hypernym	01009190
02079933	_derivationally_related_form	00318735
00888009	_verb_group	00887463
01015244	_derivationally_related_form	06732710
00594621	_verb_group	00595630
03244388	_derivationally_related_form	01930874
13894306	_derivationally_related_form	01312371
02079933	_hypernym	02077656
09873604	_derivationally_related_form	01298931
10150794	_derivationally_related_form	00636061
00752298	_hypernym	00752431
00885217	_hypernym	02458103
05010062	_synset_domain_topic_of	06090869
05190804	_hypernym	04723816
01115349	_also_see	02460502
00161739	_hypernym	00161243
10491575	_derivationally_related_form	01745722
14379829	_hypernym	14379501
05808218	_derivationally_related_form	00598954
05763412	_derivationally_related_form	00652346
01901289	_derivationally_related_form	00348571
00976653	_derivationally_related_form	01101329
02140033	_derivationally_related_form	00521209
03249342	_has_part	03921209
02116980	_verb_group	01162754
00820976	_verb_group	00820611
02407987	_verb_group	02410855
01211699	_derivationally_related_form	00140652
05178715	_derivationally_related_form	02453692
00055539	_derivationally_related_form	05171045
00137313	_hypernym	00126264
01194938	_derivationally_related_form	05268965
01201856	_hypernym	01156834
10076957	_derivationally_related_form	00202236
02343595	_verb_group	00887463
02645007	_derivationally_related_form	05861067
04946553	_derivationally_related_form	01209678
02887970	_hypernym	03597469
10523519	_derivationally_related_form	02648639
00056930	_hypernym	01752495
03432129	_derivationally_related_form	00551065
01448100	_hypernym	01850315
00987071	_hypernym	01001294
00255710	_derivationally_related_form	01535246
00817680	_derivationally_related_form	01128193
05703429	_derivationally_related_form	02169352
00706243	_derivationally_related_form	07162680
00958334	_derivationally_related_form	01019129
04956594	_derivationally_related_form	09938672
01122194	_derivationally_related_form	01168569
01516534	_verb_group	01646300
01434822	_derivationally_related_form	07961480
00618734	_derivationally_related_form	09761403
07242104	_derivationally_related_form	00812580
05768415	_hypernym	05767733
10150794	_hypernym	00007846
01053920	_derivationally_related_form	02650552
13367070	_derivationally_related_form	02323286
00311809	_hypernym	00306426
05908520	_derivationally_related_form	01651444
13961642	_derivationally_related_form	10261041
00696518	_also_see	02451113
01412346	_derivationally_related_form	03365592
00351824	_derivationally_related_form	15271417
00233335	_derivationally_related_form	04181228
00243124	_derivationally_related_form	07373602
10464178	_hypernym	09927451
06364149	_hypernym	06362953
14333433	_hypernym	14322699
10180580	_hypernym	10351874
08482271	_derivationally_related_form	01935233
00394813	_derivationally_related_form	07375405
10770059	_hypernym	10150071
00235368	_derivationally_related_form	15224293
00833199	_hypernym	00831651
07162545	_hypernym	07162194
00874806	_derivationally_related_form	00660971
06208021	_hypernym	06193203
05301908	_hypernym	05249636
08567235	_derivationally_related_form	01130607
07395104	_derivationally_related_form	01374767
03294833	_derivationally_related_form	01548718
00103696	_also_see	00896555
02030424	_derivationally_related_form	05088324
07138085	_derivationally_related_form	01034312
01551195	_derivationally_related_form	04693900
02561332	_derivationally_related_form	00410247
08418103	_hypernym	07959016
00003316	_derivationally_related_form	00836788
02586619	_derivationally_related_form	08050678
02484570	_hypernym	01323958
02030424	_derivationally_related_form	00369138
13955461	_derivationally_related_form	10509605
01745722	_derivationally_related_form	10491309
01022178	_hypernym	01017987
00341695	_hypernym	00331950
07369604	_hypernym	07357388
01921964	_also_see	01923414
02466111	_also_see	00959731
09909760	_derivationally_related_form	02347637
00209943	_derivationally_related_form	00715074
00054628	_derivationally_related_form	08368907
02649830	_hypernym	02655135
03307274	_has_part	03882611
02559752	_derivationally_related_form	07365849
00270005	_hypernym	01850315
10516294	_hypernym	09944160
00722232	_derivationally_related_form	05704694
02994448	_derivationally_related_form	01835496
00783063	_derivationally_related_form	02571511
00510050	_derivationally_related_form	05153520
01902783	_hypernym	01835496
01084637	_derivationally_related_form	02294179
00114871	_derivationally_related_form	01454810
00665886	_derivationally_related_form	00153961
01214171	_derivationally_related_form	00827730
01016316	_hypernym	01016002
06755568	_hypernym	06753800
00779601	_derivationally_related_form	15274074
05772667	_derivationally_related_form	00644583
01000214	_hypernym	02225492
01812324	_derivationally_related_form	07528212
10212780	_derivationally_related_form	01686132
00634472	_derivationally_related_form	00162632
14578104	_hypernym	13920835
05692419	_derivationally_related_form	00947077
13275288	_hypernym	13252973
01555742	_derivationally_related_form	13905121
02060141	_derivationally_related_form	00368592
02671421	_derivationally_related_form	01328705
00779360	_hypernym	00779061
07334490	_derivationally_related_form	00479391
01321002	_hypernym	00430370
01489465	_derivationally_related_form	03246052
00786195	_derivationally_related_form	02531199
10526927	_hypernym	09979321
02722782	_derivationally_related_form	14451349
00727791	_derivationally_related_form	06763681
01059123	_hypernym	00717358
06467007	_derivationally_related_form	01007924
06892016	_hypernym	06891493
01711445	_hypernym	01619354
00692329	_hypernym	00690614
04770211	_hypernym	04723816
01195299	_derivationally_related_form	04133211
01817500	_also_see	00075135
02582450	_derivationally_related_form	01186810
01226215	_hypernym	01225970
02166460	_derivationally_related_form	05784831
08441203	_hypernym	07951464
02584981	_derivationally_related_form	04806804
04759849	_hypernym	04760771
00802318	_derivationally_related_form	06687358
00503164	_derivationally_related_form	05827684
13486270	_hypernym	13446390
08381636	_hypernym	08322981
05982152	_derivationally_related_form	01633825
02568672	_derivationally_related_form	00631378
05651399	_hypernym	05650329
00946755	_derivationally_related_form	13582013
02274253	_also_see	00289082
04050410	_derivationally_related_form	01516534
10340312	_derivationally_related_form	03800933
00082081	_hypernym	00081836
02513269	_also_see	01548193
02025009	_derivationally_related_form	07959943
02913152	_has_part	04298308
00386676	_hypernym	00385791
05581514	_hypernym	05225602
10691600	_hypernym	00007846
04897762	_hypernym	04616059
02394662	_derivationally_related_form	10671042
02995345	_has_part	03125057
00325110	_hypernym	00324384
03247620	_derivationally_related_form	00084738
02550868	_derivationally_related_form	10549510
00214951	_hypernym	00126264
02609764	_derivationally_related_form	00210518
07177924	_derivationally_related_form	00763399
00868910	_hypernym	01023820
02325968	_derivationally_related_form	00081836
01176219	_hypernym	01170962
10517826	_hypernym	10372373
10191613	_derivationally_related_form	00205885
10086074	_hypernym	00007846
00740577	_derivationally_related_form	06252743
04065464	_hypernym	04105893
00053913	_derivationally_related_form	00495998
13523661	_derivationally_related_form	03002351
07963987	_derivationally_related_form	01462005
10529231	_derivationally_related_form	02203362
14920388	_derivationally_related_form	01808769
02699141	_derivationally_related_form	05840188
00095747	_derivationally_related_form	13152742
02056971	_derivationally_related_form	00307631
14562142	_derivationally_related_form	00388635
01042531	_hypernym	00941990
09773962	_hypernym	10490699
06398401	_derivationally_related_form	01620854
01802689	_derivationally_related_form	04039041
01171644	_derivationally_related_form	01146918
00640828	_hypernym	00637259
08063446	_derivationally_related_form	02244956
10665698	_derivationally_related_form	00607405
00631378	_derivationally_related_form	02561332
02611002	_derivationally_related_form	11410625
01781180	_derivationally_related_form	01222477
07007945	_derivationally_related_form	01701311
10773394	_derivationally_related_form	01150370
06601327	_derivationally_related_form	00931852
04863969	_hypernym	04861486
07240549	_derivationally_related_form	00830761
00277659	_derivationally_related_form	10381369
00879540	_derivationally_related_form	07240925
01016832	_hypernym	01012360
01865197	_also_see	01870889
07331400	_derivationally_related_form	01299758
04836074	_derivationally_related_form	00884778
13911151	_derivationally_related_form	02660147
06757891	_hypernym	06756407
02641957	_hypernym	02641463
01760944	_derivationally_related_form	00802318
00993892	_derivationally_related_form	00615887
02231661	_derivationally_related_form	09469285
00353782	_hypernym	00351638
05157866	_derivationally_related_form	01870889
00019613	_hypernym	00020827
01638368	_hypernym	01631534
00613683	_derivationally_related_form	00053097
03318438	_derivationally_related_form	02576921
05869857	_derivationally_related_form	00368109
10383237	_derivationally_related_form	00404642
01552219	_hypernym	01552519
04688246	_derivationally_related_form	01505254
10209246	_derivationally_related_form	01789514
03412220	_hypernym	03619890
14997888	_derivationally_related_form	01458228
07222823	_derivationally_related_form	00953216
01649999	_derivationally_related_form	07252764
01090446	_derivationally_related_form	00483146
05800611	_hypernym	05797597
01636008	_hypernym	01636397
00980453	_derivationally_related_form	07154330
01740608	_synset_domain_topic_of	00916464
04164989	_hypernym	03892891
01209953	_hypernym	01206218
10169796	_derivationally_related_form	01931768
04836683	_hypernym	04835724
00611972	_derivationally_related_form	10450303
02507736	_derivationally_related_form	14406573
05838765	_hypernym	05835747
02075462	_derivationally_related_form	10115082
02037090	_derivationally_related_form	05069199
05549830	_has_part	05549061
04687333	_derivationally_related_form	00776523
03081021	_hypernym	03892891
02928413	_hypernym	03600977
03281145	_derivationally_related_form	01974062
03416329	_hypernym	03848729
00917772	_derivationally_related_form	07522128
00729109	_verb_group	02455407
00239230	_hypernym	00235435
07325190	_derivationally_related_form	00345761
00095502	_derivationally_related_form	02422026
06427831	_derivationally_related_form	00200397
07209965	_derivationally_related_form	00910973
03082979	_derivationally_related_form	02218759
07212424	_derivationally_related_form	01009240
14562324	_derivationally_related_form	01566490
01803003	_hypernym	01789514
00646542	_derivationally_related_form	00644503
01819554	_derivationally_related_form	01222477
05302499	_hypernym	05610008
02679530	_derivationally_related_form	02806261
05786372	_derivationally_related_form	00723056
00170156	_synset_domain_topic_of	06090869
01620854	_hypernym	01619929
02444159	_verb_group	01525666
10771392	_derivationally_related_form	01846916
07334876	_hypernym	07334490
10332385	_derivationally_related_form	13814041
00109660	_derivationally_related_form	11412727
14425103	_hypernym	14424780
02371718	_also_see	01959294
02455407	_derivationally_related_form	09626589
04773596	_derivationally_related_form	01835496
03327234	_derivationally_related_form	01130607
06251781	_derivationally_related_form	00973056
01647229	_derivationally_related_form	00240184
05590366	_hypernym	05289861
01555742	_derivationally_related_form	13904843
13889843	_derivationally_related_form	02037090
00186616	_also_see	00190115
00483801	_derivationally_related_form	03079741
00376400	_derivationally_related_form	01369758
07335097	_derivationally_related_form	01661804
02614181	_derivationally_related_form	13961642
08057633	_hypernym	08061042
09930257	_hypernym	10518194
02747709	_derivationally_related_form	01017987
01720660	_derivationally_related_form	00049003
02333689	_derivationally_related_form	05075602
00050652	_derivationally_related_form	03051540
01684663	_derivationally_related_form	03876519
06321054	_derivationally_related_form	00227165
00049003	_hypernym	00048374
01255967	_also_see	02467662
09278537	_has_part	08569591
02646931	_derivationally_related_form	14442933
02576349	_derivationally_related_form	09921409
01727490	_derivationally_related_form	07342049
02135048	_derivationally_related_form	11480930
07939638	_derivationally_related_form	00657260
04990220	_derivationally_related_form	01452593
01770501	_hypernym	01767949
01687569	_synset_domain_topic_of	00933420
07289014	_derivationally_related_form	01770501
02378623	_hypernym	02367363
00953216	_derivationally_related_form	10345804
02984104	_derivationally_related_form	10468559
10380672	_hypernym	10630188
09880741	_derivationally_related_form	02571511
00159177	_derivationally_related_form	01644050
05546040	_hypernym	05269901
02400378	_hypernym	00674607
00969873	_derivationally_related_form	05088324
02084104	_hypernym	01850315
05946687	_hypernym	05941423
02613487	_derivationally_related_form	07185076
01711749	_hypernym	01711445
01747717	_derivationally_related_form	10481268
00147454	_derivationally_related_form	01295275
10151570	_derivationally_related_form	02439732
10619492	_derivationally_related_form	02388950
10716389	_derivationally_related_form	00071178
01719921	_synset_domain_topic_of	07006119
05301908	_has_part	05305806
01261490	_derivationally_related_form	00851239
04837425	_hypernym	04837232
05812038	_hypernym	05810948
07039478	_hypernym	06398401
07199565	_hypernym	07160883
03285912	_derivationally_related_form	02711114
01322509	_derivationally_related_form	14287113
03405265	_hypernym	03575240
02643446	_derivationally_related_form	00978549
00154778	_derivationally_related_form	00365709
02515341	_similar_to	02517169
01079480	_verb_group	01080064
00367976	_derivationally_related_form	01378556
01256600	_hypernym	01552519
05806623	_derivationally_related_form	00588221
01058574	_derivationally_related_form	06410776
05827684	_derivationally_related_form	02116118
00378985	_derivationally_related_form	01657828
00831651	_derivationally_related_form	10205985
09379111	_hypernym	13910384
01036804	_derivationally_related_form	10206173
00081072	_hypernym	00078760
06691442	_hypernym	06686736
01191755	_derivationally_related_form	01085237
05268965	_derivationally_related_form	00991838
00013160	_derivationally_related_form	04759849
01745722	_derivationally_related_form	06589574
00647094	_derivationally_related_form	00033615
07312221	_derivationally_related_form	00270005
00255214	_hypernym	00255710
06470073	_has_part	06392935
00235918	_derivationally_related_form	06425065
00941990	_hypernym	00740577
01202728	_derivationally_related_form	01216191
01129201	_verb_group	02687916
00141806	_derivationally_related_form	00661824
00407633	_hypernym	00406243
00145218	_hypernym	00376063
06400271	_hypernym	06392001
10076957	_derivationally_related_form	00835903
01061481	_derivationally_related_form	00943363
02713594	_hypernym	02679415
00508032	_derivationally_related_form	06798750
01582645	_derivationally_related_form	00900726
05944958	_derivationally_related_form	00592702
06251781	_hypernym	06252138
01789514	_derivationally_related_form	01221790
02838592	_derivationally_related_form	13536794
01850315	_derivationally_related_form	10336234
02074377	_hypernym	02074677
08456993	_derivationally_related_form	00277659
01649999	_derivationally_related_form	00030358
00783523	_derivationally_related_form	06796642
02694933	_derivationally_related_form	00155487
00784388	_derivationally_related_form	09858299
13439570	_derivationally_related_form	00294522
02733122	_derivationally_related_form	10466918
05718935	_derivationally_related_form	10339966
00719734	_hypernym	00670261
02215001	_derivationally_related_form	00361192
01500873	_synset_domain_topic_of	00916464
00555138	_derivationally_related_form	02084252
00747418	_hypernym	02506546
02102484	_also_see	02103481
02649830	_also_see	01177505
01195299	_derivationally_related_form	08463817
02984104	_derivationally_related_form	10467395
04461696	_derivationally_related_form	01566185
02257370	_hypernym	02220461
01593614	_hypernym	01346003
10575787	_derivationally_related_form	00648224
02467662	_derivationally_related_form	03894379
00631391	_also_see	00021766
00876874	_derivationally_related_form	02106506
00838043	_hypernym	00836705
06757057	_hypernym	06756831
06251781	_derivationally_related_form	02079933
00590924	_derivationally_related_form	06593099
00961586	_derivationally_related_form	09942431
04879092	_derivationally_related_form	00583990
03082979	_has_part	03084204
02798574	_hypernym	08511241
01588493	_derivationally_related_form	07202579
06731378	_hypernym	06729499
03932203	_derivationally_related_form	01590171
02296726	_derivationally_related_form	07185076
00494269	_hypernym	02512305
00141806	_derivationally_related_form	00662589
14562683	_hypernym	14561618
06741305	_derivationally_related_form	00905852
07007945	_synset_domain_topic_of	06376154
00729378	_derivationally_related_form	05682570
01675963	_derivationally_related_form	00262249
04864200	_hypernym	04861486
06136258	_derivationally_related_form	10488865
07286799	_derivationally_related_form	00871942
00922144	_derivationally_related_form	01628197
09821831	_hypernym	09815790
00282076	_derivationally_related_form	00274707
10665302	_hypernym	00007846
02229828	_verb_group	02230056
01080064	_derivationally_related_form	00557588
03103198	_derivationally_related_form	01023636
01013434	_derivationally_related_form	02399331
01226240	_also_see	01222360
00334186	_derivationally_related_form	00376400
10231087	_hypernym	00007846
04682462	_derivationally_related_form	01538310
07369604	_derivationally_related_form	00300537
10034201	_derivationally_related_form	01171183
15109745	_derivationally_related_form	00004605
09913329	_derivationally_related_form	00858781
08512736	_derivationally_related_form	01467370
00974367	_hypernym	00831651
07212424	_derivationally_related_form	00873682
06634376	_derivationally_related_form	00831651
02511633	_hypernym	05225602
02547586	_hypernym	02556126
01711445	_synset_domain_topic_of	06157326
06428216	_derivationally_related_form	01549187
09795124	_derivationally_related_form	00965871
00355955	_derivationally_related_form	13467916
00650353	_derivationally_related_form	05748285
06170498	_hypernym	06169285
02329578	_synset_domain_topic_of	00917211
00772189	_derivationally_related_form	07140978
01952898	_derivationally_related_form	10514429
10309347	_hypernym	10630188
00681429	_derivationally_related_form	05733583
06392935	_hypernym	06392001
10794014	_derivationally_related_form	00929718
00444309	_derivationally_related_form	13508651
04767347	_hypernym	04723816
02469835	_hypernym	02434976
05352291	_hypernym	05333777
02468793	_derivationally_related_form	13810323
00657260	_derivationally_related_form	07939638
05600637	_has_part	05367341
05805902	_hypernym	05805475
00050195	_hypernym	00048374
01931768	_derivationally_related_form	10290422
00285889	_derivationally_related_form	01929254
04596630	_derivationally_related_form	01884974
01474513	_derivationally_related_form	02436349
02735418	_derivationally_related_form	07291312
02079933	_derivationally_related_form	00121366
00900375	_hypernym	00898518
13954253	_hypernym	00024720
10599806	_derivationally_related_form	01067816
04630689	_hypernym	00024264
07203126	_derivationally_related_form	00717045
01161635	_derivationally_related_form	14562324
13580415	_derivationally_related_form	02335828
00873603	_also_see	02278939
13354420	_derivationally_related_form	00731159
01505254	_derivationally_related_form	05850823
10388924	_derivationally_related_form	02204692
05764197	_derivationally_related_form	00713167
03579982	_has_part	03695122
06711159	_hypernym	06710546
03365592	_hypernym	03536348
00839778	_derivationally_related_form	01170052
03129123	_derivationally_related_form	01753788
07521674	_derivationally_related_form	01780202
02150510	_derivationally_related_form	00880662
01350283	_derivationally_related_form	00138956
00607780	_derivationally_related_form	05786372
00414409	_derivationally_related_form	00168658
00799383	_derivationally_related_form	10784922
01321456	_derivationally_related_form	14425103
10045454	_derivationally_related_form	05984287
00019792	_hypernym	00019448
10752480	_derivationally_related_form	00854904
13780719	_derivationally_related_form	10235549
01540449	_derivationally_related_form	14597158
01640855	_hypernym	01642924
02215001	_hypernym	02202384
14561618	_hypernym	14560612
00426958	_derivationally_related_form	00053609
01328705	_derivationally_related_form	02671421
02440244	_derivationally_related_form	09623038
00298497	_derivationally_related_form	01930874
01619929	_derivationally_related_form	03180504
00900375	_derivationally_related_form	01686956
01040707	_hypernym	00838043
02428924	_derivationally_related_form	01230965
06392935	_derivationally_related_form	00885082
02982790	_derivationally_related_form	01478002
11669921	_derivationally_related_form	00294245
02469274	_derivationally_related_form	09442838
01227235	_hypernym	01227675
10553805	_derivationally_related_form	02551144
02089984	_derivationally_related_form	07351612
01454810	_derivationally_related_form	00115036
00410247	_derivationally_related_form	01834304
00873682	_derivationally_related_form	07185668
00471437	_hypernym	00467719
00824066	_derivationally_related_form	10740017
02169702	_hypernym	02106506
09810166	_derivationally_related_form	02005948
01872877	_hypernym	01835496
02230056	_hypernym	02221959
01787955	_derivationally_related_form	14406573
10279018	_derivationally_related_form	01624169
00597915	_derivationally_related_form	09801864
00752144	_hypernym	00751944
01876907	_derivationally_related_form	00348571
02518990	_hypernym	01432517
02068413	_derivationally_related_form	07436100
06714288	_derivationally_related_form	00824292
01646866	_derivationally_related_form	05827253
02898711	_has_part	02733524
02205272	_also_see	02311387
01068134	_derivationally_related_form	06681551
00716758	_derivationally_related_form	06733227
01329239	_hypernym	01340439
05138208	_hypernym	04723816
10786517	_hypernym	00007846
00052672	_derivationally_related_form	01356750
10426749	_derivationally_related_form	00903559
00858781	_derivationally_related_form	07246036
00612114	_also_see	01718867
04846770	_hypernym	04723816
00311809	_derivationally_related_form	01843364
10596689	_derivationally_related_form	01843904
00784342	_derivationally_related_form	07193596
04661151	_derivationally_related_form	00813044
02807731	_hypernym	04105893
02648639	_derivationally_related_form	01053920
04096848	_hypernym	02796623
05426243	_hypernym	05267548
05549830	_has_part	05558717
05194043	_derivationally_related_form	01875295
10556518	_hypernym	10438172
01104624	_derivationally_related_form	09998101
02584915	_hypernym	02584643
06687178	_hypernym	06686736
06467445	_derivationally_related_form	01007924
06507041	_hypernym	06502378
02695895	_derivationally_related_form	00155487
02531625	_derivationally_related_form	10068234
00686890	_derivationally_related_form	00965871
05728678	_derivationally_related_form	01638368
02163746	_derivationally_related_form	00881649
00150287	_hypernym	00109660
00760402	_hypernym	01030832
00730538	_hypernym	00730247
09931640	_synset_domain_topic_of	00523513
00875394	_derivationally_related_form	10673451
00219012	_derivationally_related_form	01323958
01643657	_derivationally_related_form	13426376
05074774	_derivationally_related_form	01987160
14445226	_derivationally_related_form	00388635
02037090	_derivationally_related_form	13892897
03575240	_hypernym	00021939
08568978	_hypernym	08630039
07111047	_synset_domain_topic_of	06177033
02697725	_hypernym	00836236
07009538	_hypernym	07007945
01549719	_hypernym	01548718
10380672	_derivationally_related_form	00990008
02395395	_hypernym	02391803
10205985	_derivationally_related_form	00831651
10624310	_derivationally_related_form	00546389
04004210	_hypernym	03084420
02150510	_derivationally_related_form	10633450
00945853	_derivationally_related_form	01011166
00830761	_derivationally_related_form	07240549
02432530	_derivationally_related_form	04768657
01256743	_derivationally_related_form	02440244
05254795	_hypernym	05237755
00624263	_derivationally_related_form	06880664
00557813	_derivationally_related_form	02079933
09629752	_derivationally_related_form	02102002
08191701	_member_meronym	08191532
00053913	_derivationally_related_form	01511380
07203126	_derivationally_related_form	01011725
00152018	_derivationally_related_form	01030132
00887463	_hypernym	01158872
05786372	_derivationally_related_form	00607780
13536794	_derivationally_related_form	02838592
08078020	_derivationally_related_form	02459633
00388065	_derivationally_related_form	01322675
10126177	_derivationally_related_form	00240754
02448185	_derivationally_related_form	08008335
00235368	_derivationally_related_form	01149480
00830761	_derivationally_related_form	10252547
10518194	_derivationally_related_form	02412175
01291069	_hypernym	01354673
05578442	_has_part	05271383
01817314	_derivationally_related_form	07497976
05112609	_hypernym	04723816
02372605	_hypernym	02367363
04613158	_derivationally_related_form	01292885
03574555	_hypernym	03297735
05781347	_hypernym	05774614
05556325	_hypernym	05220461
10732314	_derivationally_related_form	02349212
02460502	_also_see	01115349
00556193	_derivationally_related_form	00380083
00792471	_also_see	01646866
00081072	_derivationally_related_form	00694990
04321534	_derivationally_related_form	10658304
00144694	_hypernym	00144850
05271383	_hypernym	05269901
07357679	_derivationally_related_form	00400883
02500884	_also_see	00933154
00233335	_derivationally_related_form	01148614
00678282	_derivationally_related_form	01144355
02703539	_hypernym	02690708
04295081	_hypernym	03430959
01172889	_also_see	02559180
02575723	_hypernym	02575082
00037396	_derivationally_related_form	02367363
00715239	_derivationally_related_form	05916739
00041188	_derivationally_related_form	01079480
05564590	_derivationally_related_form	02230772
07567390	_hypernym	07566340
01239064	_derivationally_related_form	02450256
10068234	_derivationally_related_form	00786458
09626589	_hypernym	00007846
08109624	_hypernym	07992450
02455407	_derivationally_related_form	06767035
00548173	_derivationally_related_form	02382087
02501278	_derivationally_related_form	02603926
02060141	_hypernym	01378556
05566097	_hypernym	05559908
10525134	_derivationally_related_form	01301410
00115036	_hypernym	00114431
10341955	_hypernym	00007846
02443609	_hypernym	02441022
00199707	_derivationally_related_form	00126264
14483917	_hypernym	14481929
01744111	_derivationally_related_form	00591519
01023259	_hypernym	00958334
13955461	_hypernym	13954818
05728678	_derivationally_related_form	00709625
01049266	_hypernym	01048912
02576921	_also_see	01634424
07339329	_hypernym	07283608
01649999	_verb_group	01771390
06387980	_has_part	06400271
07439570	_hypernym	07405893
04617562	_has_part	04623113
02685665	_derivationally_related_form	08628921
02567519	_hypernym	01120069
02396716	_hypernym	02475922
01487008	_hypernym	01482449
07216083	_derivationally_related_form	00818553
00806502	_derivationally_related_form	06687358
09628382	_hypernym	00007846
00241038	_hypernym	00441445
05827684	_derivationally_related_form	00770437
10261041	_derivationally_related_form	15140892
09998101	_derivationally_related_form	01104624
00048656	_derivationally_related_form	02020590
01306654	_derivationally_related_form	02156532
07881800	_derivationally_related_form	01170052
05195362	_derivationally_related_form	00765649
14497763	_derivationally_related_form	00419289
03008275	_derivationally_related_form	01490336
02479323	_derivationally_related_form	08055150
00264366	_derivationally_related_form	00171586
02608823	_hypernym	02604760
00952182	_derivationally_related_form	07110615
03109881	_derivationally_related_form	01934205
03775199	_derivationally_related_form	00394813
00756780	_derivationally_related_form	00854904
08482271	_synset_domain_topic_of	08199025
00413876	_derivationally_related_form	01051331
09926862	_hypernym	10708454
02614181	_verb_group	02618149
05145891	_derivationally_related_form	00933154
01899891	_derivationally_related_form	00348571
10349243	_derivationally_related_form	02557199
00787218	_hypernym	00786195
06733227	_derivationally_related_form	00716758
02128653	_derivationally_related_form	10633450
02517169	_similar_to	02515341
00338641	_derivationally_related_form	01346003
13732078	_derivationally_related_form	00642098
08664443	_derivationally_related_form	01711749
01505254	_derivationally_related_form	11498040
04879092	_hypernym	04878861
07002992	_hypernym	06634376
00258857	_derivationally_related_form	00403092
06740183	_derivationally_related_form	00894738
03789946	_hypernym	03699975
04877421	_derivationally_related_form	00887463
01639714	_derivationally_related_form	10438172
02422663	_derivationally_related_form	10525134
03949442	_derivationally_related_form	01163847
01017987	_derivationally_related_form	02684924
01534609	_derivationally_related_form	00717748
00828237	_derivationally_related_form	00040353
07326557	_hypernym	07323922
06539770	_derivationally_related_form	00715868
00931232	_derivationally_related_form	06602935
00946588	_derivationally_related_form	01011166
10037385	_derivationally_related_form	01190277
04702688	_hypernym	04701460
00732552	_derivationally_related_form	05818741
00512186	_derivationally_related_form	14548343
02678839	_hypernym	02678663
01835496	_derivationally_related_form	04773596
10468559	_derivationally_related_form	02443609
08199025	_hypernym	08208016
00941974	_hypernym	00941777
00339464	_verb_group	00342980
06018465	_derivationally_related_form	10652954
01935233	_derivationally_related_form	08482271
02027411	_hypernym	02025009
00509958	_hypernym	00109660
00940412	_derivationally_related_form	01632411
05775407	_derivationally_related_form	01881696
00378985	_hypernym	00376063
09606009	_derivationally_related_form	00796315
01448100	_verb_group	01609287
05827253	_hypernym	05827684
00013160	_also_see	01932973
02012344	_derivationally_related_form	10724699
05248181	_hypernym	05225602
02553697	_derivationally_related_form	09953178
01626420	_hypernym	01656788
00431826	_derivationally_related_form	13457378
03017922	_derivationally_related_form	01640855
05822746	_derivationally_related_form	00734054
00228236	_hypernym	00214951
01800349	_also_see	01133876
03103128	_has_part	03320046
00969873	_verb_group	00968211
00059376	_verb_group	00059019
01643464	_derivationally_related_form	00935940
07410207	_hypernym	07338681
14004317	_derivationally_related_form	00014549
01484982	_derivationally_related_form	14890659
00428000	_derivationally_related_form	02578510
00965871	_derivationally_related_form	06726158
07510625	_derivationally_related_form	00090186
03180504	_hypernym	04552696
00771961	_derivationally_related_form	10209082
01383638	_hypernym	00004475
01009190	_derivationally_related_form	00480969
00916464	_derivationally_related_form	09779790
00597265	_hypernym	00596807
01845720	_hypernym	01843055
00845523	_derivationally_related_form	01428853
10431625	_derivationally_related_form	00674607
03163798	_hypernym	03099945
10292316	_derivationally_related_form	01653442
00309310	_hypernym	00334186
01548193	_also_see	01226240
05600637	_has_part	05313535
01746605	_also_see	00173764
00831651	_derivationally_related_form	08462320
02073714	_derivationally_related_form	00055633
00193486	_derivationally_related_form	07373803
01995211	_derivationally_related_form	03233905
01014990	_derivationally_related_form	00158804
06740644	_derivationally_related_form	00895304
13541167	_hypernym	00029677
14298815	_hypernym	14285662
09258715	_hypernym	09379111
00610374	_derivationally_related_form	05762998
02444662	_hypernym	00803325
00368109	_derivationally_related_form	05869857
07356676	_derivationally_related_form	00156601
02150948	_derivationally_related_form	02517169
06763681	_derivationally_related_form	01705257
07561112	_hypernym	07560652
00255710	_derivationally_related_form	00036178
00050693	_derivationally_related_form	00426581
00941974	_derivationally_related_form	01309701
05838176	_derivationally_related_form	00699815
00029378	_hypernym	00023100
02131072	_also_see	00921014
00575720	_derivationally_related_form	15055633
05803938	_derivationally_related_form	00631737
00827730	_derivationally_related_form	01214171
13134947	_derivationally_related_form	00506672
00708980	_derivationally_related_form	05982152
01048466	_hypernym	01046984
02005948	_derivationally_related_form	00048374
02265231	_derivationally_related_form	09761403
07175241	_derivationally_related_form	01035530
01202415	_hypernym	01080366
02536557	_derivationally_related_form	11414608
13306870	_derivationally_related_form	02320374
00318035	_derivationally_related_form	02230772
05549830	_has_part	05555688
05704266	_derivationally_related_form	00722232
11498040	_derivationally_related_form	01609287
05216365	_has_part	05538625
06633363	_derivationally_related_form	00894738
07161429	_hypernym	07160883
05562249	_has_part	05573895
00893167	_derivationally_related_form	10399299
02735897	_derivationally_related_form	01207609
10729175	_hypernym	10225219
02749247	_hypernym	02748927
09805475	_derivationally_related_form	01639714
00935940	_derivationally_related_form	10029068
13367070	_derivationally_related_form	02285392
00151087	_derivationally_related_form	02154508
00971650	_derivationally_related_form	07202579
00419289	_derivationally_related_form	14498096
00470701	_verb_group	00471058
00376400	_derivationally_related_form	00334186
02556126	_derivationally_related_form	02354537
04687333	_derivationally_related_form	01806505
05785067	_derivationally_related_form	00813044
02554922	_hypernym	02556126
06684572	_derivationally_related_form	01013040
05601198	_derivationally_related_form	02877704
04897762	_derivationally_related_form	02518161
00335366	_derivationally_related_form	00376994
07348399	_hypernym	07352190
00783523	_verb_group	00975036
00786195	_hypernym	00407535
01930874	_synset_domain_topic_of	00298497
10451590	_hypernym	10207831
02169352	_derivationally_related_form	05818741
02390470	_derivationally_related_form	10206887
05785885	_derivationally_related_form	00630380
00164152	_hypernym	00163779
00824767	_hypernym	00826509
09285254	_hypernym	09385911
00334996	_derivationally_related_form	09873604
06252138	_derivationally_related_form	00742320
03180969	_hypernym	03183080
01767949	_derivationally_related_form	02364448
02479323	_derivationally_related_form	13367593
02367363	_derivationally_related_form	00165942
08108972	_member_meronym	08109624
00640828	_also_see	02645007
02348568	_hypernym	02232190
04105893	_has_part	04546855
00242808	_derivationally_related_form	01762528
01238640	_derivationally_related_form	07410207
01627355	_derivationally_related_form	07324380
00050693	_derivationally_related_form	02625016
01629000	_hypernym	01621555
09184834	_hypernym	00023773
04806804	_hypernym	05142180
02286204	_hypernym	02285629
01091427	_derivationally_related_form	09939313
00972621	_synset_domain_topic_of	08199025
02706691	_derivationally_related_form	06172502
01077887	_derivationally_related_form	00239230
14704966	_derivationally_related_form	01332205
07217924	_derivationally_related_form	00967098
01560984	_verb_group	01560731
00306723	_derivationally_related_form	00377364
02383831	_also_see	00548781
00372665	_hypernym	00146138
10214637	_hypernym	09614315
01817314	_derivationally_related_form	05979454
00804695	_also_see	00873603
00182406	_derivationally_related_form	00363788
01835496	_verb_group	01850315
00812580	_derivationally_related_form	04661151
05511618	_has_part	05385534
01830946	_derivationally_related_form	05520699
01092366	_derivationally_related_form	01170962
01106808	_hypernym	01080366
00795720	_derivationally_related_form	02419773
00742320	_derivationally_related_form	00494907
01458664	_derivationally_related_form	04332243
06589574	_has_part	06489659
00690614	_derivationally_related_form	06782019
02747709	_verb_group	02684924
01122194	_hypernym	01072262
01369346	_derivationally_related_form	14562683
00739082	_derivationally_related_form	05770926
00698855	_derivationally_related_form	10583916
10541229	_derivationally_related_form	00715868
00563824	_derivationally_related_form	05803212
04526241	_hypernym	03526198
10599354	_hypernym	00007846
02850732	_hypernym	03775199
13990502	_hypernym	13989627
00142191	_derivationally_related_form	05064037
00115036	_derivationally_related_form	01448100
00815379	_derivationally_related_form	07199922
10722385	_derivationally_related_form	00602805
05773923	_derivationally_related_form	00633443
02107248	_derivationally_related_form	04060647
00442267	_derivationally_related_form	14686913
00570590	_derivationally_related_form	05675130
02406916	_verb_group	00765977
02334595	_hypernym	02327200
07324380	_derivationally_related_form	01627355
08110373	_synset_domain_topic_of	06037666
02637202	_hypernym	02727462
01321002	_derivationally_related_form	13085864
11450869	_hypernym	11499284
10292316	_hypernym	10284064
00926668	_derivationally_related_form	01666131
06687701	_hypernym	06687358
00386676	_derivationally_related_form	02030158
00062133	_derivationally_related_form	02487718
00463246	_has_part	15256915
03091374	_hypernym	03575240
00523513	_hypernym	00426928
01023820	_derivationally_related_form	02438535
02749778	_derivationally_related_form	08053576
01062583	_hypernym	00030358
00455348	_derivationally_related_form	00486018
08053576	_hypernym	08008335
00035189	_derivationally_related_form	01640855
00446514	_hypernym	00146138
02670890	_derivationally_related_form	05149325
00066191	_verb_group	00066685
00445169	_synset_domain_topic_of	06090869
00038750	_derivationally_related_form	04635104
10752480	_derivationally_related_form	02500619
00873603	_derivationally_related_form	05035961
13941125	_hypernym	13939892
05808218	_derivationally_related_form	02154508
00946105	_hypernym	01026095
08000304	_hypernym	07999699
00754280	_derivationally_related_form	02572119
00920336	_verb_group	00662589
01494310	_also_see	01570403
01732921	_hypernym	01712704
00034574	_hypernym	00037396
00717358	_derivationally_related_form	00859001
07419233	_derivationally_related_form	00374534
01385170	_derivationally_related_form	04353803
00996485	_derivationally_related_form	06404582
01461328	_derivationally_related_form	05870180
04689660	_hypernym	04688246
02701210	_derivationally_related_form	02964634
00739340	_hypernym	00628491
00691516	_verb_group	00971015
10463943	_derivationally_related_form	01036804
15286042	_synset_domain_topic_of	07020895
02153709	_hypernym	02131279
00900616	_also_see	01275562
09791530	_hypernym	09617867
05657718	_hypernym	05652396
02232190	_hypernym	01850315
05786372	_derivationally_related_form	00739340
00658627	_derivationally_related_form	02348927
01872877	_verb_group	01872645
01563336	_hypernym	01563005
01342529	_hypernym	08106934
02407338	_derivationally_related_form	10665302
00306102	_hypernym	00042757
00445169	_derivationally_related_form	14480772
01563005	_derivationally_related_form	07747455
02526085	_derivationally_related_form	00062806
01930874	_derivationally_related_form	03244388
04474035	_derivationally_related_form	01953810
01116380	_also_see	02180797
00596644	_derivationally_related_form	01374582
02523521	_derivationally_related_form	00066901
09790482	_derivationally_related_form	00643473
02193194	_derivationally_related_form	05710210
