# Supplementary material
Source: ML conference proceedings conference paper supplement (https://proceedings.neurips.cc/paper_files/paper/2021/hash/0fd600c953cde8121262e322ef09f70e-Abstract.html)
Supplement: Supplementary file 1 [file 0fd600c953cde8121262e322ef09f70e-Supplemental.zip › Supplementary_Material_Paper_8745/data/GraIL-BM_WN18RR_v3/test/test-fact.txt]

02521241	_member_meronym	02521916
02341974	_hypernym	02339376
03109350	_instance_hypernym	04511002
00053609	_derivationally_related_form	00426958
01631759	_hypernym	01626134
08766988	_member_of_domain_region	09877443
01215137	_derivationally_related_form	06547832
02923510	_derivationally_related_form	06234825
08897065	_has_part	09168020
00014742	_hypernym	00014405
00211108	_derivationally_related_form	13460568
02354781	_hypernym	02353861
14894140	_hypernym	14727670
02441723	_member_meronym	02442845
00963283	_derivationally_related_form	06790042
02832818	_derivationally_related_form	02720201
01153305	_derivationally_related_form	00369194
02601589	_member_meronym	02601921
12043248	_member_meronym	12043444
01269360	_instance_hypernym	00223983
00702226	_derivationally_related_form	04438304
02399000	_derivationally_related_form	01174555
09044862	_has_part	09110422
02453890	_member_meronym	02457586
01292727	_hypernym	01292534
02528534	_member_meronym	02540255
02583139	_derivationally_related_form	00962129
02927512	_derivationally_related_form	09044862
00492677	_also_see	02111684
02593863	_member_meronym	02595902
00210738	_derivationally_related_form	13077033
09044862	_member_of_domain_region	08122009
03299648	_hypernym	03214670
04300080	_derivationally_related_form	01594362
09401474	_instance_hypernym	09403734
09052652	_member_meronym	10802283
02398854	_derivationally_related_form	10271677
06778102	_derivationally_related_form	00853633
03829085	_hypernym	02718811
01478300	_member_meronym	01478511
12982723	_hypernym	11592146
01454856	_hypernym	02552171
02870092	_derivationally_related_form	06413889
04186848	_derivationally_related_form	01560369
06845599	_member_of_domain_usage	02705651
01262936	_derivationally_related_form	07738353
08564307	_has_part	09109444
01042764	_hypernym	01041968
08860123	_member_of_domain_region	04240576
09169801	_instance_hypernym	08505573
07450343	_derivationally_related_form	00855295
12972818	_hypernym	11594676
14607521	_derivationally_related_form	00264875
15155220	_has_part	15227846
09131654	_has_part	09244972
05588174	_derivationally_related_form	02884456
09714120	_derivationally_related_form	08953324
09141526	_has_part	09145083
01639369	_member_meronym	01642671
00626800	_also_see	00625393
06845599	_member_of_domain_usage	04006727
08381820	_hypernym	08381636
07556637	_derivationally_related_form	01167188
00854150	_derivationally_related_form	10221312
08136260	_hypernym	08348815
10181990	_hypernym	10024119
08860123	_member_of_domain_region	02463990
06845599	_member_of_domain_usage	03771066
06621447	_derivationally_related_form	02797021
12992464	_member_meronym	12975207
09682291	_derivationally_related_form	02923510
02424085	_hypernym	02419796
09119277	_has_part	09370383
08860123	_member_of_domain_region	07722485
14487731	_derivationally_related_form	00492706
04762355	_derivationally_related_form	00625393
13016457	_member_meronym	13001743
01303582	_instance_hypernym	00962722
02536165	_has_part	07796165
02601344	_has_part	07784367
08416652	_hypernym	08251877
00963283	_derivationally_related_form	00963241
02176747	_hypernym	02176261
06214580	_derivationally_related_form	10619176
07689217	_hypernym	07689003
12970379	_member_meronym	12970560
10244913	_hypernym	09770949
08780881	_member_of_domain_region	07036862
02066450	_member_meronym	02068735
09117351	_has_part	09123809
04352070	_hypernym	02716205
13007417	_hypernym	12998815
03854065	_hypernym	04586932
13002433	_member_meronym	13003522
02655523	_hypernym	02652668
01245813	_derivationally_related_form	01078050
13077295	_derivationally_related_form	00210738
08615638	_derivationally_related_form	01934427
08860123	_member_of_domain_region	07696527
09078231	_member_of_domain_region	06938493
09048880	_has_part	09147964
08365855	_derivationally_related_form	09945603
08505573	_hypernym	07941945
01523823	_derivationally_related_form	01244593
00366858	_derivationally_related_form	13572436
01273016	_hypernym	01531742
14994328	_derivationally_related_form	00266586
09134386	_has_part	09192708
02353844	_derivationally_related_form	03427296
12992464	_member_meronym	12992868
01953810	_derivationally_related_form	04473432
09071690	_has_part	09074431
02635013	_member_meronym	02635154
09117351	_member_of_domain_region	01294127
02416104	_hypernym	02414578
15147850	_has_part	15146004
02456962	_hypernym	02453611
13023292	_member_meronym	13024012
02470451	_member_meronym	02483915
02601589	_member_meronym	02601767
09150448	_instance_hypernym	08672738
06845599	_member_of_domain_usage	03748456
03599761	_derivationally_related_form	02461063
02623170	_member_meronym	02623868
08894456	_has_part	09430771
09416076	_hypernym	00019128
00963283	_derivationally_related_form	04879658
02131418	_member_meronym	02133902
02509197	_hypernym	02507649
01448291	_hypernym	01446589
14894140	_derivationally_related_form	02192383
06295235	_member_of_domain_usage	03443912
09139380	_instance_hypernym	08665504
02602405	_hypernym	02552171
03457686	_hypernym	03461385
02484975	_hypernym	02484473
02449921	_member_meronym	02450034
13024967	_member_meronym	13025647
06845599	_member_of_domain_usage	14753808
02112891	_similar_to	02111684
00624263	_derivationally_related_form	06372095
01642671	_member_meronym	01643092
13052931	_hypernym	13049953
08953151	_has_part	08953324
02797021	_derivationally_related_form	06593803
00902932	_derivationally_related_form	06630627
09886807	_hypernym	09700492
02548689	_hypernym	02552171
13516176	_derivationally_related_form	00210738
07803408	_hypernym	07803545
02400139	_member_meronym	02423787
06845599	_member_of_domain_usage	03818843
08860123	_member_of_domain_region	08547300
02064154	_member_meronym	02064608
08174398	_member_meronym	09044862
02007417	_derivationally_related_form	00281132
02465414	_derivationally_related_form	01186428
08999482	_member_of_domain_region	09327077
08860123	_member_of_domain_region	13752172
02396427	_hypernym	02395003
02395244	_member_meronym	02396427
01552956	_member_meronym	01553142
04112752	_derivationally_related_form	00103317
08014860	_instance_hypernym	08392137
02011810	_derivationally_related_form	01778568
06960298	_derivationally_related_form	02957823
02658944	_member_meronym	02659176
00853633	_derivationally_related_form	00431005
13010219	_hypernym	11590783
12060546	_hypernym	12041446
02329093	_member_meronym	02329401
02535909	_member_meronym	02536864
02354950	_member_meronym	02355711
02400139	_member_meronym	02407959
10082146	_derivationally_related_form	00991838
08723006	_member_of_domain_region	05915584
09721244	_derivationally_related_form	08961402
06295235	_member_of_domain_usage	07140348
02660769	_member_meronym	02661765
02366702	_member_meronym	02366825
01244593	_derivationally_related_form	00038365
09095023	_has_part	09095751
04051825	_derivationally_related_form	01130607
02672859	_derivationally_related_form	13529616
14883206	_derivationally_related_form	00443670
09095751	_has_part	03009477
00902932	_hypernym	00897241
12998349	_member_meronym	13016457
03568653	_hypernym	03828465
08723006	_has_part	09327881
09051235	_has_part	09075842
08860123	_member_of_domain_region	08555333
00159899	_derivationally_related_form	00880227
12963796	_member_meronym	12965209
01604251	_derivationally_related_form	00299680
13011856	_member_meronym	13012030
02716866	_hypernym	02716205
08766988	_has_part	08775784
00491689	_derivationally_related_form	09440186
09095023	_has_part	09306031
01471070	_member_meronym	01626134
00897241	_derivationally_related_form	06630017
12979630	_hypernym	11592146
01542207	_verb_group	01541579
01503061	_has_part	01896031
02640857	_hypernym	02640242
14487731	_derivationally_related_form	00493259
02074915	_member_meronym	02083038
01645278	_hypernym	01626600
13065215	_member_meronym	13065514
00230172	_derivationally_related_form	02156546
08801678	_has_part	08804962
02534734	_has_part	07795751
02117900	_hypernym	02117135
04412727	_hypernym	02720201
00853633	_derivationally_related_form	10221312
01015996	_derivationally_related_form	10366779
02648313	_hypernym	02647660
14996020	_derivationally_related_form	01245637
04879658	_derivationally_related_form	00963283
09075842	_has_part	09076675
02641825	_member_meronym	02646377
15155220	_has_part	15165490
14599641	_derivationally_related_form	00264875
10338094	_derivationally_related_form	02390101
02551824	_member_meronym	02552171
06845599	_member_of_domain_usage	04407007
01299735	_has_part	01295918
01647803	_member_meronym	01648001
08860123	_member_of_domain_region	04314522
08766988	_member_of_domain_region	09222742
02136271	_derivationally_related_form	04069276
04010348	_hypernym	02720725
08860123	_member_of_domain_region	08504851
02379753	_derivationally_related_form	00212205
04733204	_derivationally_related_form	02262542
13060689	_member_meronym	13060912
04473432	_derivationally_related_form	01953810
07229747	_hypernym	07229530
08780881	_has_part	08783286
14686913	_derivationally_related_form	00442267
13054211	_member_meronym	13055009
12039743	_member_meronym	12045352
01915131	_derivationally_related_form	02898711
08305942	_hypernym	08168978
08860123	_member_of_domain_region	03702719
07673397	_hypernym	07672135
03519578	_hypernym	03519981
01640383	_member_meronym	01640567
02641608	_member_meronym	02651846
01465994	_member_meronym	01467986
03467517	_hypernym	04338517
13030852	_hypernym	13028611
02412440	_derivationally_related_form	00058265
08174398	_member_meronym	08780881
02854739	_hypernym	04508489
02389346	_verb_group	02389592
14807929	_hypernym	05407119
12985236	_hypernym	11592146
14859622	_hypernym	14961512
02505809	_member_meronym	02505998
06871384	_derivationally_related_form	01050896
13016457	_member_meronym	13232515
02659808	_hypernym	02658079
09070793	_has_part	02956500
00432839	_derivationally_related_form	14489113
09368224	_derivationally_related_form	08641113
00680485	_derivationally_related_form	06211078
02340186	_hypernym	02339922
02175958	_derivationally_related_form	04989657
00086835	_derivationally_related_form	00824054
13000372	_member_meronym	13005568
09117351	_has_part	09192973
09761068	_derivationally_related_form	02470685
02399000	_hypernym	02394477
13753585	_hypernym	13745420
10621514	_derivationally_related_form	00849294
09095023	_member_of_domain_region	01283935
08860123	_member_of_domain_region	09351547
00772813	_derivationally_related_form	00963283
09284015	_derivationally_related_form	01567888
02071294	_hypernym	02068974
07622261	_derivationally_related_form	01265740
08095647	_member_meronym	08096474
00410406	_derivationally_related_form	09738708
02549533	_member_meronym	02549796
06845599	_member_of_domain_usage	14753414
06695862	_derivationally_related_form	00880227
00883635	_hypernym	00883226
02649218	_hypernym	02648625
01645634	_hypernym	01626134
14836468	_hypernym	14732946
09709001	_hypernym	09708405
08554440	_hypernym	08553535
13077033	_hypernym	12992868
13043516	_hypernym	11590783
13575433	_derivationally_related_form	00458754
01398941	_derivationally_related_form	04049405
02528534	_member_meronym	02541431
08801678	_member_of_domain_region	06964247
08368308	_derivationally_related_form	02875499
02425086	_hypernym	02419796
01640383	_member_meronym	01640846
08563627	_has_part	09057311
08801099	_member_meronym	09696124
01190840	_derivationally_related_form	07891726
09301249	_instance_hypernym	09241247
01883212	_member_meronym	01883513
09071690	_has_part	09378014
08342039	_hypernym	08339454
04353016	_hypernym	04352070
13070003	_hypernym	11590783
02607630	_member_meronym	02609466
13039870	_member_meronym	13040108
02535349	_member_meronym	02535537
00105778	_derivationally_related_form	09930876
09682803	_derivationally_related_form	08095647
01890860	_hypernym	01889520
02936020	_derivationally_related_form	06321702
15169248	_hypernym	15228378
03933529	_derivationally_related_form	02331175
10272171	_hypernym	09886010
14599168	_hypernym	14739360
13060451	_member_meronym	13062112
00252710	_derivationally_related_form	15147850
02521241	_member_meronym	02525543
10146927	_derivationally_related_form	00899597
05951969	_derivationally_related_form	10306279
03315644	_derivationally_related_form	01271189
02435853	_hypernym	02399000
06845599	_member_of_domain_usage	03295357
04764741	_derivationally_related_form	00485711
08723006	_member_of_domain_region	08321469
09052314	_instance_hypernym	09044862
12083339	_member_meronym	12083591
09060768	_has_part	09358096
09044862	_has_part	09067277
06214744	_derivationally_related_form	00408852
13037124	_hypernym	11592146
00713250	_derivationally_related_form	01266895
06845599	_member_of_domain_usage	14747168
08801678	_member_of_domain_region	08541609
13298935	_hypernym	13298701
02409202	_hypernym	02407959
08860123	_member_of_domain_region	06699225
00105778	_derivationally_related_form	00427580
07858595	_derivationally_related_form	02195470
13015229	_hypernym	11592146
08174398	_member_meronym	09039411
00419137	_derivationally_related_form	07443210
06845599	_member_of_domain_usage	03155334
05716744	_derivationally_related_form	02196690
02420789	_derivationally_related_form	00719705
01468238	_hypernym	01466257
00575970	_derivationally_related_form	15055633
09232165	_instance_hypernym	09475292
08124971	_has_part	08125722
12998349	_member_meronym	13074084
08641113	_derivationally_related_form	10352299
06201908	_derivationally_related_form	00680346
00880227	_derivationally_related_form	06695579
08984788	_has_part	09453566
06845599	_member_of_domain_usage	04006953
02066707	_hypernym	02062744
08929922	_member_of_domain_region	13753274
01126846	_hypernym	01127411
06413889	_derivationally_related_form	07009946
12968408	_member_meronym	12970379
09127461	_instance_hypernym	09399592
00883226	_derivationally_related_form	07230089
00135285	_derivationally_related_form	06372095
10490421	_hypernym	09841188
04051068	_hypernym	02673637
02340930	_hypernym	02339376
08929922	_member_of_domain_region	06964901
02593863	_member_meronym	02596888
06845599	_member_of_domain_usage	04476633
09119277	_has_part	04604009
08674970	_derivationally_related_form	02468965
00105554	_derivationally_related_form	00431005
09038990	_has_part	09719430
09243405	_instance_hypernym	09215664
15159583	_derivationally_related_form	00734927
02633677	_hypernym	02632989
00485711	_derivationally_related_form	04764741
01896031	_has_part	01897991
01696135	_derivationally_related_form	04694809
03670622	_hypernym	02716866
09087599	_has_part	09368479
08149781	_hypernym	08081668
09260466	_hypernym	09416076
13024763	_member_meronym	13024967
02534352	_member_meronym	02535349
01891438	_member_meronym	01891633
03612814	_hypernym	03990474
09044862	_has_part	09111366
03662016	_hypernym	03681148
02396796	_hypernym	02395003
09082540	_has_part	09084483
10318892	_derivationally_related_form	01743531
12978969	_hypernym	11590783
06845599	_member_of_domain_usage	04443588
02989475	_hypernym	02996840
06344461	_hypernym	06343971
01874928	_hypernym	01874434
15228378	_hypernym	15129927
10352299	_derivationally_related_form	08641113
02068735	_member_meronym	02069569
02324045	_has_part	02158739
02356108	_member_meronym	02355477
03362393	_hypernym	02715941
05681117	_has_part	05768553
07427337	_derivationally_related_form	00223500
10582154	_derivationally_related_form	02540670
09078231	_member_of_domain_region	02581957
02507337	_member_meronym	02509694
10268299	_derivationally_related_form	02614387
07443210	_derivationally_related_form	00441212
08780881	_member_of_domain_region	09542697
02015168	_derivationally_related_form	00057306
09039411	_member_of_domain_region	06340047
02430191	_derivationally_related_form	01081456
06845599	_member_of_domain_usage	03588668
06295235	_member_of_domain_usage	09212572
02335349	_member_meronym	02338029
13007770	_hypernym	11592146
07679356	_derivationally_related_form	01337653
02331309	_hypernym	02331046
00680346	_hypernym	00680145
08986066	_instance_hypernym	08691669
11517494	_derivationally_related_form	00073584
09067277	_has_part	09373716
00842692	_derivationally_related_form	01186428
00492677	_derivationally_related_form	08615374
13005329	_hypernym	12998815
07653394	_hypernym	07649854
10382825	_derivationally_related_form	03854065
02652668	_hypernym	02552171
00088725	_derivationally_related_form	01215137
02453890	_member_meronym	02456776
09400667	_instance_hypernym	09440186
01158572	_derivationally_related_form	13451804
07779747	_hypernym	07775905
01653026	_hypernym	01639765
02358091	_hypernym	02355227
04947628	_hypernym	04947186
09075842	_has_part	09378014
08860123	_member_of_domain_region	07450343
00040188	_derivationally_related_form	00256961
02411705	_has_part	02439568
09044862	_has_part	09059274
00991838	_derivationally_related_form	14864360
02510455	_hypernym	02507649
02546075	_derivationally_related_form	10183757
02553196	_member_meronym	02621721
00191517	_derivationally_related_form	13496771
02400139	_member_meronym	02409702
14841267	_derivationally_related_form	02112891
01167981	_derivationally_related_form	08253815
00492677	_derivationally_related_form	04764741
02341475	_hypernym	02339376
10162354	_derivationally_related_form	03497657
02130308	_hypernym	02127808
01141938	_derivationally_related_form	02062744
07590611	_hypernym	07588947
02380009	_derivationally_related_form	10525617
01888520	_member_meronym	01893535
01560369	_derivationally_related_form	00360242
01648494	_member_meronym	01648620
09194357	_has_part	09357847
12967776	_hypernym	11590783
08932568	_has_part	08933621
01445027	_derivationally_related_form	14757547
02457756	_member_meronym	02457945
13660178	_derivationally_related_form	00491689
01130607	_derivationally_related_form	04051825
06845599	_member_of_domain_usage	15071684
02602212	_derivationally_related_form	07515974
03497657	_has_part	02902079
09103943	_has_part	09459557
00161739	_derivationally_related_form	01696648
08133189	_hypernym	08337324
00799537	_derivationally_related_form	02414473
13205482	_member_meronym	13210006
08860123	_member_of_domain_region	04441528
09109444	_has_part	09109882
01305361	_hypernym	02085742
02336011	_hypernym	02329401
03970363	_hypernym	02896442
03061081	_derivationally_related_form	05996646
13486270	_derivationally_related_form	00442267
01382818	_derivationally_related_form	01639765
02673480	_hypernym	02832168
08860123	_member_of_domain_region	07635155
13006377	_hypernym	11592146
01075117	_hypernym	00954086
02784732	_derivationally_related_form	01273263
06295235	_member_of_domain_usage	03885028
00089154	_derivationally_related_form	14283632
02907985	_instance_hypernym	04511002
15058163	_hypernym	15057744
08910668	_has_part	09237404
14276936	_hypernym	14070360
08214470	_hypernym	08190754
13038944	_member_meronym	13046285
00366858	_derivationally_related_form	15055633
08860123	_member_of_domain_region	13359941
02652979	_member_meronym	02653359
13029946	_member_meronym	13030157
09114696	_has_part	09418484
03914919	_derivationally_related_form	01543731
09109444	_has_part	09441725
05410646	_hypernym	05407119
13063269	_hypernym	12992868
03928814	_hypernym	03614007
02483915	_member_meronym	02484473
02068206	_hypernym	02066707
02654425	_hypernym	02652668
06845599	_member_of_domain_usage	03554131
00483656	_derivationally_related_form	06863751
13063046	_hypernym	11594676
00604617	_derivationally_related_form	04718563
06295235	_member_of_domain_usage	04323819
01144550	_derivationally_related_form	02443484
09049599	_has_part	09103943
13003522	_hypernym	12998815
14974264	_derivationally_related_form	01268457
08860123	_member_of_domain_region	07889814
02355477	_hypernym	02355227
09060768	_has_part	09326467
06510977	_derivationally_related_form	02896789
04248851	_derivationally_related_form	01480770
01758308	_derivationally_related_form	01173813
14705718	_derivationally_related_form	01354006
09044862	_member_of_domain_region	08303692
12992464	_member_meronym	11592146
03747746	_hypernym	03771443
13031956	_hypernym	11592146
01320513	_derivationally_related_form	10587227
02485451	_derivationally_related_form	01164874
01193099	_derivationally_related_form	00840630
13210006	_hypernym	13167078
03550533	_hypernym	02718469
02590237	_member_meronym	02592244
02373093	_member_meronym	02373601
12982103	_hypernym	11590783
04353410	_hypernym	03828465
02072355	_member_meronym	02072493
09711132	_hypernym	09710164
01290435	_instance_hypernym	01075117
09250165	_instance_hypernym	09453008
02156063	_derivationally_related_form	13773361
09114696	_has_part	09228619
01284444	_instance_hypernym	00223983
09044862	_has_part	09089139
02380980	_hypernym	01766952
02553196	_member_meronym	02618244
12996225	_member_meronym	13065902
06367373	_derivationally_related_form	01635176
13068434	_hypernym	13066129
02325211	_member_meronym	02325366
02554235	_derivationally_related_form	10663315
02574651	_member_meronym	02574910
06295235	_member_of_domain_usage	09269972
01546660	_member_meronym	01547459
00288486	_derivationally_related_form	01928730
09048880	_has_part	09092497
06295235	_member_of_domain_usage	01042764
00719705	_derivationally_related_form	02461063
02590910	_derivationally_related_form	10788852
00964105	_instance_hypernym	00962129
09141526	_has_part	09388121
10792335	_derivationally_related_form	01778017
02597367	_hypernym	02594250
02346315	_member_meronym	02346823
00201058	_derivationally_related_form	01972131
09152944	_has_part	09153710
02564403	_hypernym	02562315
13030157	_member_meronym	13030438
15165289	_has_part	15169136
02133704	_hypernym	02131653
09044862	_has_part	09075842
00962722	_derivationally_related_form	02583780
02072159	_derivationally_related_form	00914343
08932568	_has_part	08933940
10075529	_derivationally_related_form	06371413
01883513	_hypernym	01874434
05010801	_derivationally_related_form	02675458
01649948	_member_meronym	01650167
09138935	_has_part	09320985
09237076	_has_part	09405169
02688623	_derivationally_related_form	07802417
04236001	_derivationally_related_form	02701445
03200357	_hypernym	03895866
03718056	_hypernym	03214670
01644104	_hypernym	01626134
09044862	_has_part	09078231
00751389	_derivationally_related_form	00848466
09219078	_instance_hypernym	09403734
02546744	_member_meronym	02546873
05043973	_derivationally_related_form	02112029
01649948	_member_meronym	01652163
09078231	_derivationally_related_form	02738760
02989893	_hypernym	02996840
08860123	_member_of_domain_usage	10548227
