# Supplementary material
Source: ML conference proceedings conference paper supplement (https://proceedings.neurips.cc/paper_files/paper/2021/hash/0fd600c953cde8121262e322ef09f70e-Abstract.html)
Supplement: Supplementary file 1 [file 0fd600c953cde8121262e322ef09f70e-Supplemental.zip › Supplementary_Material_Paper_8745/data/GraIL-BM_WN18RR_v3/test/test-graph.txt]

04300080	_derivationally_related_form	00331842
04085873	_hypernym	03315644
09060768	_has_part	09166902
02502212	_member_meronym	02502357
02644967	_member_meronym	02645143
08860123	_member_of_domain_region	04188064
01648818	_member_meronym	01648993
00091124	_derivationally_related_form	14361182
00880227	_derivationally_related_form	10095869
00904046	_derivationally_related_form	13990502
07644382	_has_part	07650637
12978969	_member_meronym	12979129
06696025	_derivationally_related_form	00768778
08723006	_has_part	08728595
10118382	_derivationally_related_form	00605310
13007195	_member_meronym	13007417
01262936	_derivationally_related_form	07851054
15055633	_derivationally_related_form	00575720
09044862	_has_part	09292751
00619183	_derivationally_related_form	15159819
00015498	_derivationally_related_form	15273626
14487184	_derivationally_related_form	00427786
08726745	_has_part	08727396
03009477	_instance_hypernym	03813704
01567888	_derivationally_related_form	09284015
02581108	_hypernym	02580336
01653509	_hypernym	01639765
01894040	_member_meronym	01894207
08640111	_derivationally_related_form	02336947
01876667	_hypernym	01876326
13060912	_member_meronym	13061704
02600953	_member_meronym	02601200
06871384	_hypernym	06865345
08897065	_member_meronym	09700492
08723006	_has_part	08729626
09060768	_has_part	09064468
02553196	_member_meronym	02620033
02458135	_hypernym	02456962
00718573	_derivationally_related_form	01268112
01904120	_derivationally_related_form	00057306
15015501	_derivationally_related_form	00504676
08860123	_member_of_domain_region	03599964
03758720	_hypernym	02720201
12980231	_member_meronym	12981595
08766988	_has_part	08769645
09293917	_instance_hypernym	09403734
12039743	_member_meronym	12048772
08012765	_instance_hypernym	08392137
01305361	_derivationally_related_form	03933529
01642671	_member_meronym	01643374
03828465	_hypernym	02721538
08251877	_hypernym	08240633
09452395	_hypernym	09477890
01269008	_derivationally_related_form	04521987
07710616	_hypernym	07566863
15170786	_hypernym	15169873
00154778	_derivationally_related_form	00365709
07978423	_member_meronym	06372680
08894456	_has_part	08895771
13572436	_derivationally_related_form	00575720
08860123	_member_of_domain_region	06263020
02701445	_derivationally_related_form	15273626
08437968	_hypernym	08437515
06295235	_member_of_domain_usage	02892948
02446014	_member_meronym	02446206
08764107	_has_part	08765771
06973610	_derivationally_related_form	03075191
09089139	_has_part	09089923
01972131	_hypernym	00124442
02553196	_member_meronym	02581803
08860123	_member_of_domain_region	08482577
01871406	_member_meronym	01871699
08168978	_has_part	08167365
01234345	_derivationally_related_form	00421535
01269360	_instance_hypernym	01075117
02627292	_hypernym	02626762
14991927	_hypernym	14991712
06841365	_derivationally_related_form	00190023
08860123	_member_of_domain_region	10464542
00657016	_derivationally_related_form	09307300
02102605	_hypernym	02101108
02400139	_member_meronym	02423465
09141526	_has_part	03020927
07961016	_derivationally_related_form	00657016
09273447	_has_part	08887013
06767777	_derivationally_related_form	00953923
08554440	_derivationally_related_form	02804590
08929922	_has_part	08944561
02568392	_derivationally_related_form	10621514
14040846	_derivationally_related_form	00211108
00073584	_derivationally_related_form	11517494
02543412	_member_meronym	02543565
08766988	_member_of_domain_region	07491591
13016457	_member_meronym	13231436
08849753	_has_part	09421191
09326662	_hypernym	09303008
02366825	_member_meronym	02366959
02196690	_hypernym	02196948
09044862	_has_part	08564307
02341108	_member_meronym	02341288
00897241	_derivationally_related_form	10146927
02608176	_derivationally_related_form	10352299
01881857	_hypernym	01881171
02073041	_member_meronym	02073250
02262542	_derivationally_related_form	14481080
02638323	_member_meronym	02641063
09370773	_has_part	09232165
01481027	_hypernym	01480770
08197386	_hypernym	08337324
13034953	_member_meronym	13037124
08207540	_hypernym	08207209
09059274	_has_part	09419281
06295235	_member_of_domain_usage	09407346
06295235	_member_of_domain_usage	04434932
00963241	_derivationally_related_form	00963283
12998349	_member_meronym	13000372
01050896	_derivationally_related_form	06860177
09023321	_member_of_domain_region	07916970
02620318	_member_meronym	02620443
10690421	_hypernym	10726786
08809749	_has_part	08810220
00419137	_derivationally_related_form	00147862
00030358	_hypernym	00029378
01041674	_derivationally_related_form	00085626
09117351	_has_part	09330604
08801678	_has_part	08811982
09117351	_has_part	09114401
08860123	_member_of_domain_region	07752264
02657805	_member_meronym	02658079
09039411	_has_part	09203217
09057311	_has_part	09288946
00427786	_also_see	01908039
01193886	_derivationally_related_form	00904046
00999817	_also_see	01148283
06295235	_member_of_domain_usage	00508952
02649689	_member_meronym	02651412
03327234	_derivationally_related_form	01588134
02420789	_derivationally_related_form	03599761
03792334	_hypernym	02799897
02510240	_member_meronym	02510455
08860123	_member_of_domain_region	04115456
09126305	_has_part	09224325
09138935	_has_part	09222880
10775128	_derivationally_related_form	01141938
09039411	_has_part	09040839
01073655	_derivationally_related_form	01193099
10285135	_hypernym	09807754
02595217	_member_meronym	02595339
03534890	_instance_hypernym	03160309
12998349	_member_meronym	13019017
07189411	_derivationally_related_form	00866505
13043264	_hypernym	11594676
08860123	_member_of_domain_region	10336904
02613181	_hypernym	02612657
03836062	_hypernym	03017070
01954852	_derivationally_related_form	00651954
02641825	_member_meronym	02642107
03325769	_derivationally_related_form	02631659
10406072	_hypernym	09700964
00148472	_derivationally_related_form	13556509
01439121	_hypernym	01438208
09044862	_has_part	09410724
08860123	_member_of_domain_region	04781967
08897065	_has_part	02751623
02972499	_derivationally_related_form	08785343
09049303	_has_part	09134386
08019913	_instance_hypernym	08392137
02346627	_hypernym	02329401
01550429	_member_meronym	01550953
02692232	_hypernym	02687992
08039601	_instance_hypernym	08392137
00089351	_derivationally_related_form	02310482
09711132	_derivationally_related_form	02972499
09886010	_hypernym	10320863
08860123	_member_of_domain_region	08285896
13556509	_derivationally_related_form	00441212
02074915	_member_meronym	02116959
14536831	_derivationally_related_form	00211108
08766988	_has_part	08770932
11450566	_derivationally_related_form	00505802
09039411	_has_part	09042213
04072811	_derivationally_related_form	00025654
02402409	_derivationally_related_form	00215683
04449796	_hypernym	03828465
02583780	_derivationally_related_form	00962722
00298041	_derivationally_related_form	08366202
08800258	_has_part	08800676
01944617	_hypernym	01939598
00287258	_hypernym	00283911
01680132	_derivationally_related_form	01896031
13065215	_hypernym	11592146
08766988	_has_part	08951957
06845599	_member_of_domain_usage	03755991
12039743	_member_meronym	12074678
00782072	_derivationally_related_form	10722965
14842992	_derivationally_related_form	01292727
09090825	_has_part	09380817
07804152	_hypernym	07802417
09092497	_has_part	09093472
14910165	_hypernym	14732946
01645093	_member_meronym	01645278
08254055	_hypernym	08253640
01482071	_hypernym	01480516
14672224	_hypernym	14672023
02595702	_hypernym	02594552
08766988	_member_of_domain_region	13753067
00281132	_derivationally_related_form	02007417
09141526	_has_part	09341465
01650509	_member_meronym	01651059
00218475	_derivationally_related_form	03251766
13044778	_hypernym	12992868
01547641	_verb_group	01547390
09091909	_instance_hypernym	08638442
01547459	_member_meronym	01548143
09044862	_member_of_domain_region	13881381
06778102	_derivationally_related_form	10224098
06295235	_member_of_domain_usage	03093574
08860123	_member_of_domain_region	03868044
09131654	_has_part	09405949
04508062	_hypernym	02967626
11507321	_hypernym	11499817
13208468	_member_meronym	13208705
06214744	_derivationally_related_form	09945603
08860123	_member_of_domain_region	07642182
00980908	_derivationally_related_form	05960464
02368787	_derivationally_related_form	04993882
09192708	_instance_hypernym	09403734
08871007	_has_part	08876975
02628467	_member_meronym	02628600
09761068	_derivationally_related_form	02434541
11764231	_member_meronym	11764814
15273955	_derivationally_related_form	00014742
09103377	_instance_hypernym	08695539
12078172	_hypernym	12041446
01778568	_derivationally_related_form	02011810
13560417	_hypernym	13456715
00409281	_derivationally_related_form	09863749
09044862	_has_part	09377315
02400139	_member_meronym	02422249
03783017	_hypernym	02718811
00450335	_derivationally_related_form	01958615
08860123	_member_of_domain_region	03555426
10619176	_derivationally_related_form	06214580
02608004	_derivationally_related_form	09368224
09044862	_member_of_domain_region	15186871
02595339	_hypernym	02594552
02196690	_derivationally_related_form	05716744
01480880	_hypernym	01480516
06845599	_member_of_domain_usage	03553708
00256746	_derivationally_related_form	01596645
01645093	_hypernym	01626134
10117267	_derivationally_related_form	06778102
13211516	_member_meronym	13211790
06295235	_member_of_domain_usage	05872742
14487184	_derivationally_related_form	01908039
14712036	_derivationally_related_form	00025728
00030358	_derivationally_related_form	01643657
08929922	_has_part	08943601
02456147	_member_meronym	02456275
14747168	_hypernym	14747338
09089139	_has_part	09089782
02971469	_derivationally_related_form	06990000
12963796	_member_meronym	12966386
07573103	_hypernym	07572957
12053138	_member_meronym	12053405
07573241	_hypernym	07573103
09731436	_hypernym	09634494
03905730	_hypernym	03525454
13987423	_derivationally_related_form	01148283
02463990	_derivationally_related_form	10564800
07035420	_hypernym	07033007
07153727	_derivationally_related_form	00853958
10548227	_derivationally_related_form	00590518
02458822	_hypernym	02458517
02400139	_member_meronym	02426634
00025654	_derivationally_related_form	09407043
02064608	_member_meronym	02064816
03979847	_hypernym	14593671
01502946	_derivationally_related_form	03938244
10548227	_hypernym	10548681
08808292	_has_part	08808452
01653384	_member_meronym	01653509
12062468	_hypernym	12041446
02525866	_member_meronym	02527498
02644967	_member_meronym	02646117
02902079	_hypernym	04008947
09330604	_instance_hypernym	09328904
08860123	_member_of_domain_region	10452752
10472799	_hypernym	09807754
06845599	_member_of_domain_usage	03694490
04547592	_derivationally_related_form	01130607
07380144	_derivationally_related_form	02088627
08929922	_has_part	09331328
00441212	_derivationally_related_form	07443210
00419137	_hypernym	00223500
09109444	_has_part	09407632
02748618	_hypernym	15009843
09023321	_member_of_domain_region	08018189
08806897	_has_part	09161090
02470451	_member_meronym	02470899
08395682	_hypernym	08337324
08874469	_instance_hypernym	08546183
12975207	_member_meronym	12975608
02602215	_member_meronym	02602620
02663849	_has_part	07791274
08860123	_member_of_domain_region	07595751
00842692	_derivationally_related_form	01169704
01302086	_has_part	01300242
08929922	_member_of_domain_region	08626947
00089351	_derivationally_related_form	02310007
02281485	_derivationally_related_form	07556637
01428155	_member_meronym	02545569
00264875	_derivationally_related_form	14599641
12968408	_member_meronym	12968658
01253778	_derivationally_related_form	01706889
09127461	_instance_hypernym	09233715
12102133	_hypernym	12101870
00991838	_derivationally_related_form	10082146
06845599	_member_of_domain_usage	03568653
02546177	_member_meronym	02546331
09071690	_has_part	09075007
08897065	_has_part	09371360
03807052	_hypernym	03809939
01086945	_hypernym	13265904
02176611	_member_meronym	02176747
10454972	_hypernym	09884391
14879750	_hypernym	14879605
01547390	_derivationally_related_form	01064148
01675190	_also_see	00487653
06295235	_member_of_domain_usage	02831595
09688008	_derivationally_related_form	02957823
01446283	_member_meronym	01447822
15228267	_hypernym	15154774
02934594	_derivationally_related_form	05556943
13773539	_derivationally_related_form	01643657
02687992	_has_part	04396466
02631349	_derivationally_related_form	10163723
02996840	_hypernym	02716866
12968882	_member_meronym	12969670
05408388	_hypernym	14807929
14881303	_derivationally_related_form	02335363
09945603	_derivationally_related_form	06214744
01449252	_member_meronym	01449374
01649170	_hypernym	01639765
06845599	_member_of_domain_usage	04135315
11875691	_hypernym	11868814
02137549	_hypernym	02134971
02352591	_hypernym	02329401
00963283	_derivationally_related_form	02402409
07424109	_derivationally_related_form	00605310
14747587	_hypernym	14745635
02498355	_member_meronym	02498888
08174398	_member_meronym	08953324
02553196	_member_meronym	02618697
13572436	_derivationally_related_form	00442267
01427278	_derivationally_related_form	09772746
09060768	_has_part	09066534
02733187	_derivationally_related_form	05395690
11495041	_derivationally_related_form	00403401
08860123	_member_of_domain_region	09937489
01245986	_hypernym	01245637
09108164	_has_part	09340203
03626115	_derivationally_related_form	01531265
08082236	_has_part	08082602
02429695	_member_meronym	02434834
08785343	_derivationally_related_form	02972499
01448767	_member_meronym	01449586
02174115	_derivationally_related_form	00076393
09084750	_has_part	09473808
02073679	_member_meronym	02073831
12221522	_hypernym	12221191
09044862	_member_of_domain_region	07927931
09100982	_instance_hypernym	08638442
02596381	_hypernym	02594250
08860123	_member_of_domain_region	09928845
02339768	_member_meronym	02339922
06125041	_hypernym	05996646
09303008	_hypernym	09366317
13029946	_hypernym	11594676
04238321	_derivationally_related_form	01353670
13052431	_hypernym	11592146
02619029	_member_meronym	02619409
03298211	_hypernym	02830852
01633949	_hypernym	01626600
10352299	_derivationally_related_form	02608176
08849753	_has_part	08850741
02616851	_hypernym	02612657
08723006	_has_part	08728066
02083038	_member_meronym	02119961
07688412	_hypernym	07689003
00657016	_derivationally_related_form	07961016
12039743	_member_meronym	12054499
02134589	_member_meronym	02136285
06366581	_derivationally_related_form	00135285
09044862	_has_part	09356080
02432983	_hypernym	02430045
08860123	_member_of_domain_region	08250635
02553196	_member_meronym	02571300
12963307	_hypernym	11590783
06990000	_derivationally_related_form	02971469
07571547	_hypernym	07571324
02469588	_member_meronym	02501101
00550016	_derivationally_related_form	10318892
02391049	_hypernym	02374149
06947479	_derivationally_related_form	02927512
08929922	_has_part	08936647
00057306	_derivationally_related_form	01904120
08875547	_instance_hypernym	08540532
01472303	_member_meronym	01472502
09093608	_has_part	09452017
04988258	_hypernym	04987620
04201733	_hypernym	02814533
09148970	_has_part	09405515
02083038	_member_meronym	02118854
08168978	_hypernym	08359949
08984788	_has_part	09166304
09268927	_instance_hypernym	09386842
01706889	_derivationally_related_form	10160624
08860123	_member_of_domain_region	10490421
02572904	_member_meronym	02573075
01354006	_derivationally_related_form	14705718
02365672	_member_meronym	02365848
09762509	_derivationally_related_form	01720980
12994979	_member_meronym	13023292
01853696	_verb_group	01915365
06295235	_member_of_domain_usage	05921685
09704630	_derivationally_related_form	08873622
08340153	_member_meronym	08347704
02390101	_derivationally_related_form	10338094
08929922	_member_meronym	09692250
02434541	_derivationally_related_form	09761068
01503061	_has_part	07644382
08215248	_hypernym	08190754
09153570	_instance_hypernym	08638442
00828990	_derivationally_related_form	00086835
13061704	_synset_domain_topic_of	12992464
00578795	_derivationally_related_form	01245637
01044533	_derivationally_related_form	07127252
02643673	_derivationally_related_form	02394068
06845599	_member_of_domain_usage	03654086
08860123	_member_of_domain_region	15244351
06211078	_derivationally_related_form	00680485
08358594	_hypernym	08359949
03191967	_hypernym	03828465
02599784	_member_meronym	02600135
10254965	_hypernym	10182913
04947628	_derivationally_related_form	02234781
03701391	_hypernym	02760429
06845599	_member_of_domain_usage	03942244
09053185	_has_part	09453887
02655020	_has_part	07781972
09044862	_member_of_domain_region	06907728
01054694	_derivationally_related_form	02395406
12977795	_member_meronym	12978969
03856148	_hypernym	03800001
14750782	_hypernym	15058163
08860123	_member_of_domain_region	07455151
07642182	_hypernym	07628870
09134386	_has_part	09357580
08167779	_hypernym	08167365
02139479	_member_meronym	02140357
09075842	_has_part	09281545
07628870	_hypernym	07622061
09120594	_instance_hypernym	08540532
09076675	_has_part	08124649
14618253	_derivationally_related_form	00265094
01891438	_member_meronym	01892271
01928730	_derivationally_related_form	00288486
01550172	_hypernym	01547832
02639464	_member_meronym	02639605
09148970	_has_part	09151411
06767777	_derivationally_related_form	01058880
09714120	_derivationally_related_form	08953151
06845599	_member_of_domain_usage	03886237
02327028	_hypernym	02326432
04474466	_derivationally_related_form	01480770
09044862	_member_of_domain_region	13363970
08929922	_has_part	08932568
10663315	_derivationally_related_form	02322596
06845599	_member_of_domain_usage	03021531
09148970	_has_part	09151963
08894456	_instance_hypernym	08558488
13001930	_hypernym	12992868
00324231	_hypernym	00328128
06845599	_member_of_domain_usage	03031553
13408641	_hypernym	13408023
02919100	_derivationally_related_form	00962129
01650167	_hypernym	01639765
02553196	_member_meronym	02558724
01398941	_derivationally_related_form	04561734
02553196	_member_meronym	02607630
01058870	_derivationally_related_form	01186428
13460568	_hypernym	13478525
08723006	_member_of_domain_region	07638439
06295235	_member_of_domain_usage	01223877
01465994	_member_meronym	01466828
08849753	_has_part	08851034
01290435	_instance_hypernym	00968155
09222742	_instance_hypernym	09284015
06207561	_derivationally_related_form	01778017
02661765	_member_meronym	02661892
15137047	_hypernym	15163005
06969129	_synset_domain_topic_of	06236802
08860123	_member_of_domain_usage	03904183
08871007	_member_meronym	09701148
00513401	_derivationally_related_form	02120458
02458675	_member_meronym	02458822
07625493	_hypernym	07622708
00458754	_derivationally_related_form	13575433
10384214	_derivationally_related_form	01139865
08723006	_has_part	08729283
01652297	_hypernym	01650167
00853958	_derivationally_related_form	06778102
12039743	_member_meronym	12081851
10561613	_derivationally_related_form	01193099
02083038	_member_meronym	02120387
06889591	_derivationally_related_form	00883226
08812952	_has_part	08813699
00432839	_derivationally_related_form	13556509
01438720	_member_meronym	01439121
01304121	_instance_hypernym	00962567
07501420	_derivationally_related_form	01778017
08194927	_hypernym	08279800
10610465	_derivationally_related_form	00014742
12039743	_member_meronym	12082357
09747329	_derivationally_related_form	03130073
10163723	_derivationally_related_form	02631349
02483092	_hypernym	02470899
07623933	_hypernym	07625493
08482577	_hypernym	08337324
09382362	_instance_hypernym	09403734
02400139	_member_meronym	02425756
06845599	_member_of_domain_usage	04412727
02338449	_hypernym	02329401
09093608	_has_part	09094217
04305323	_hypernym	03719053
08873622	_has_part	08597023
02738760	_derivationally_related_form	09078231
06295235	_member_of_domain_usage	06128307
12039743	_member_meronym	12076075
09044862	_member_of_domain_region	06245084
13529616	_derivationally_related_form	02672859
00198213	_derivationally_related_form	14757547
08085648	_synset_domain_topic_of	08083599
02469588	_member_meronym	02470451
09057311	_has_part	09249418
12039743	_member_meronym	12083339
04078747	_hypernym	09328904
09044862	_member_of_domain_region	03720665
08801678	_has_part	08846135
02488291	_hypernym	02484473
08860123	_member_of_domain_region	09942871
12978654	_hypernym	11590783
02415435	_hypernym	02414578
09403734	_has_part	09348460
13205482	_member_meronym	13209647
09133010	_has_part	09326467
09078231	_member_of_domain_region	03637480
02628259	_hypernym	02627835
11449907	_derivationally_related_form	00505802
09139508	_instance_hypernym	08695539
09114696	_has_part	09341465
02927512	_derivationally_related_form	06947479
01756719	_derivationally_related_form	07009946
01628885	_member_meronym	01630284
00751389	_derivationally_related_form	06556481
01639105	_derivationally_related_form	09934921
09201301	_has_part	09192708
03046257	_derivationally_related_form	00490968
09934921	_derivationally_related_form	01639105
00849294	_hypernym	00854717
00492706	_derivationally_related_form	14857278
07229747	_derivationally_related_form	00883226
02553196	_member_meronym	02573918
09060768	_has_part	09268927
06295235	_member_of_domain_usage	03461119
09194357	_has_part	09464652
01893825	_has_part	01900837
02525044	_derivationally_related_form	10404426
08174398	_member_meronym	08984788
02355711	_member_meronym	02362025
03032576	_hypernym	02716866
09110422	_has_part	09243209
01543731	_derivationally_related_form	03914919
09102016	_has_part	09340935
15137676	_hypernym	15118453
00504676	_derivationally_related_form	13521873
14516743	_hypernym	14487184
06845599	_member_of_domain_usage	03023175
01749184	_derivationally_related_form	03926575
08897065	_instance_hypernym	08698379
01958615	_synset_domain_topic_of	00450335
02527813	_member_meronym	02544596
03599761	_derivationally_related_form	02420789
00021065	_derivationally_related_form	03041491
02329093	_member_meronym	02330582
09152944	_has_part	09177385
12963796	_member_meronym	12964572
02638323	_member_meronym	02640093
00963283	_derivationally_related_form	05960464
06845599	_member_of_domain_usage	03921749
01640567	_member_meronym	01641391
02547947	_member_meronym	02548247
02615739	_hypernym	02614387
02583567	_hypernym	01438208
02134589	_member_meronym	02135220
13393427	_hypernym	13388245
06845599	_member_of_domain_usage	03022041
02528534	_member_meronym	02528949
01885158	_hypernym	01883513
02064608	_member_meronym	02065026
01064401	_derivationally_related_form	02596381
12977565	_member_meronym	12977795
13049561	_member_meronym	13053816
09024467	_instance_hypernym	08691669
09141526	_has_part	09144730
08860123	_member_of_domain_region	07676425
01861465	_member_meronym	01873850
06845599	_member_of_domain_usage	04520618
01450081	_member_meronym	01451524
13053816	_hypernym	11592146
05407119	_derivationally_related_form	02915055
08790953	_instance_hypernym	09393605
10016103	_derivationally_related_form	00592001
01953810	_derivationally_related_form	04474035
00432839	_hypernym	00432683
02540637	_member_meronym	02540983
02553196	_member_meronym	02573406
08860123	_member_of_domain_region	10641301
15169873	_has_part	15170504
00458754	_derivationally_related_form	14738752
04295881	_has_part	04434285
06869951	_derivationally_related_form	00482180
02323186	_member_meronym	02328270
07796165	_hypernym	07795751
00442267	_derivationally_related_form	13572436
01646134	_hypernym	01626600
01625747	_member_meronym	01628450
00450866	_hypernym	00450335
00089657	_hypernym	00089351
14607521	_derivationally_related_form	02196690
02628600	_hypernym	02623445
01428155	_member_meronym	02546177
12141495	_hypernym	12102133
12060816	_member_meronym	12061614
09237404	_instance_hypernym	09328904
02831595	_hypernym	04205318
01353405	_derivationally_related_form	04159058
06757891	_derivationally_related_form	01635176
15209413	_has_part	15136147
13031956	_member_meronym	13032115
04066023	_hypernym	04511002
06295235	_member_of_domain_usage	00457228
10489944	_derivationally_related_form	06056923
07667151	_has_part	07667326
01643687	_hypernym	01626600
14753808	_hypernym	14751417
04007510	_hypernym	03800001
02650541	_hypernym	02650050
00858849	_derivationally_related_form	00016380
02367993	_member_meronym	02368116
11449907	_derivationally_related_form	00506040
04323819	_hypernym	03540267
02553196	_member_meronym	02611767
10485440	_derivationally_related_form	02580577
08860123	_member_of_domain_region	13345286
12997654	_hypernym	12992868
08910668	_member_meronym	09714429
04085873	_derivationally_related_form	01271658
08723006	_member_of_domain_region	07866723
09044862	_has_part	09482715
08860123	_member_of_domain_usage	04217546
04512476	_instance_hypernym	04511002
02373601	_member_meronym	02377480
02590237	_member_meronym	02591205
06477209	_hypernym	06471737
04521987	_derivationally_related_form	01269008
01908039	_derivationally_related_form	14487184
01894670	_member_meronym	01894803
02545569	_member_meronym	02545687
08729626	_member_of_domain_region	08019913
12963140	_hypernym	11594676
04760771	_derivationally_related_form	00626800
01245813	_hypernym	01245618
00590148	_derivationally_related_form	09906848
02599557	_has_part	07792470
08860123	_member_of_domain_region	00501479
06845599	_member_of_domain_usage	04419315
09823287	_derivationally_related_form	00918471
02324850	_has_part	07666521
02521916	_member_meronym	02521646
01477745	_member_meronym	01477875
12968882	_member_meronym	12969927
02486232	_derivationally_related_form	08385009
06699225	_hypernym	06698252
07443210	_derivationally_related_form	00421125
08801678	_has_part	08807894
08961402	_derivationally_related_form	09721244
01449374	_hypernym	01448951
09119277	_has_part	03073832
13390857	_hypernym	13388245
13315077	_hypernym	13314936
10722965	_derivationally_related_form	04879658
01158572	_derivationally_related_form	00356367
02593863	_member_meronym	02597173
08860123	_member_of_domain_region	15160418
02593863	_member_meronym	02598747
15227846	_has_part	15228267
12039743	_member_meronym	12055317
06966310	_hypernym	06963951
02529515	_member_meronym	02533075
02335349	_member_meronym	02340813
08723006	_has_part	08727396
14859622	_hypernym	03800001
09147046	_has_part	09147618
01971280	_hypernym	01971094
09044862	_member_of_domain_region	00542841
06128307	_synset_domain_topic_of	06271778
13034953	_hypernym	11590783
09078231	_member_of_domain_region	07778938
14753188	_hypernym	14752057
02635154	_hypernym	02632989
07009946	_derivationally_related_form	01756719
02438452	_member_meronym	02438580
02196690	_derivationally_related_form	14599641
09069190	_instance_hypernym	08695539
14864360	_derivationally_related_form	00991838
09023321	_has_part	09401474
01861465	_member_meronym	01871406
08860123	_member_of_domain_region	03883664
13065902	_member_meronym	13067845
01985029	_hypernym	01983771
13752172	_hypernym	13745420
06845599	_member_of_domain_usage	03747508
08860123	_member_of_domain_region	13650921
00016380	_hypernym	00014405
02630281	_hypernym	02623445
06938493	_derivationally_related_form	02738760
02631659	_derivationally_related_form	03325769
13019017	_member_meronym	13019202
08017974	_instance_hypernym	08392137
12973541	_hypernym	11592146
08766988	_has_part	09252766
08224684	_synset_domain_topic_of	06234825
05284333	_has_part	05273684
02483915	_member_meronym	02486787
12967281	_member_meronym	12967776
09060768	_has_part	09422294
01323518	_derivationally_related_form	14696793
03251766	_derivationally_related_form	00218475
09338910	_instance_hypernym	09388848
02348405	_member_meronym	02349730
11868814	_has_part	07713395
02355711	_member_meronym	02359204
00135013	_derivationally_related_form	06147873
02332606	_member_meronym	02332755
09233284	_instance_hypernym	09403734
08860123	_member_of_domain_region	15171008
04999741	_derivationally_related_form	00991838
14777606	_hypernym	14778019
13065514	_hypernym	13063269
08723006	_member_of_domain_region	08727606
13622209	_hypernym	13615557
08563180	_has_part	09201301
08765771	_instance_hypernym	09233715
02553196	_member_meronym	02622823
09044862	_has_part	09087599
02625418	_member_meronym	02625612
01130607	_derivationally_related_form	04546855
01497292	_derivationally_related_form	02967626
01215137	_derivationally_related_form	09801102
06372680	_hypernym	06369829
08761244	_has_part	08761868
09087599	_has_part	03020927
09972661	_hypernym	10506544
09049303	_has_part	09117351
08860123	_member_of_domain_region	07795598
03057075	_derivationally_related_form	05959954
01480336	_member_meronym	01480715
09482715	_instance_hypernym	09475292
13077033	_derivationally_related_form	00210738
08860123	_member_of_domain_region	03899100
08860123	_member_of_domain_region	10460033
10656969	_hypernym	10280945
00842692	_derivationally_related_form	00073584
01437805	_member_meronym	01438720
02348405	_member_meronym	02349980
07059255	_hypernym	07071942
08766988	_member_of_domain_region	08014860
03023415	_hypernym	02716866
08766988	_has_part	09367827
12039743	_member_meronym	12062227
06845599	_member_of_domain_usage	03362393
12977296	_member_meronym	12983217
08860123	_member_of_domain_region	03694761
02409369	_member_meronym	02409508
08871007	_has_part	08877208
06845599	_member_of_domain_usage	04007510
08780881	_member_of_domain_region	06976392
02356108	_member_meronym	02356381
00233614	_derivationally_related_form	00191517
02638323	_member_meronym	02639312
01547001	_verb_group	01985029
01886220	_member_meronym	02453373
09039411	_has_part	09040475
08766988	_has_part	09408540
02651412	_member_meronym	02651617
02692232	_has_part	02693246
12980840	_hypernym	13077295
02325366	_hypernym	02324045
00365709	_derivationally_related_form	00154778
06845599	_member_of_domain_usage	03752649
09095023	_has_part	09099264
01720980	_derivationally_related_form	10163723
00375021	_derivationally_related_form	02863750
05681117	_hypernym	14024882
01050896	_derivationally_related_form	06871384
01453852	_member_meronym	01455592
01176567	_hypernym	01176232
02659176	_hypernym	02658079
09114696	_has_part	09244972
06845599	_member_of_domain_usage	03922412
09157163	_has_part	09157766
01322854	_derivationally_related_form	00620424
07891726	_derivationally_related_form	00459114
03282060	_has_part	04085873
01635176	_derivationally_related_form	06757891
02085742	_derivationally_related_form	00052146
08860123	_member_of_domain_region	04341133
09076982	_instance_hypernym	08665504
09071690	_has_part	09075170
09041785	_has_part	03475118
01041674	_hypernym	00712833
08766988	_has_part	08771596
02650050	_hypernym	02642107
07035870	_hypernym	07035420
02522581	_derivationally_related_form	09762509
02760429	_hypernym	02759963
02751623	_instance_hypernym	03160309
01266895	_derivationally_related_form	10118382
03347472	_hypernym	04450749
07035870	_derivationally_related_form	00861423
01130607	_also_see	01389942
08860123	_member_of_domain_region	07678193
02323186	_member_meronym	02323449
08348815	_hypernym	08337324
09023321	_has_part	09028062
06845599	_member_of_domain_usage	03837157
01446283	_member_meronym	01448165
03761845	_hypernym	02830852
02551824	_member_meronym	02641825
12968882	_member_meronym	12969425
08174398	_member_meronym	09023321
03041491	_derivationally_related_form	00021065
10621514	_derivationally_related_form	02568392
09118639	_instance_hypernym	08665504
15159583	_derivationally_related_form	00735389
01884703	_member_meronym	01884834
08860123	_member_of_domain_region	08143486
07921834	_hypernym	07921455
03886237	_hypernym	03800001
09057311	_has_part	03634189
09109444	_has_part	09110229
01531265	_derivationally_related_form	04159058
04761212	_hypernym	04760771
01167981	_derivationally_related_form	10013242
09102016	_has_part	09103377
14723628	_hypernym	14723079
09100080	_instance_hypernym	08665504
00426958	_derivationally_related_form	00053609
13002433	_hypernym	11592146
06869951	_hypernym	06865345
08766988	_has_part	08771116
08174398	_member_meronym	08761244
08929922	_has_part	08945277
06845599	_member_of_domain_usage	14746417
01439514	_hypernym	01439121
00904878	_derivationally_related_form	01241594
03285348	_hypernym	02715941
06369829	_has_part	06373991
13067532	_hypernym	13066129
09273447	_has_part	09479238
08806897	_member_of_domain_region	02981024
08929922	_has_part	08935212
09069862	_has_part	09264116
02967626	_derivationally_related_form	01497292
00088713	_derivationally_related_form	14174549
02486232	_derivationally_related_form	09992538
08860123	_member_of_domain_region	08346655
06295235	_member_of_domain_usage	03347472
02593863	_member_meronym	02599207
00025728	_derivationally_related_form	05039709
01446283	_member_meronym	01446589
09065557	_instance_hypernym	08638442
09082540	_has_part	09341145
08860123	_member_of_domain_region	09906848
09130076	_has_part	09131553
01176232	_verb_group	02261642
08897065	_has_part	08899577
09073697	_instance_hypernym	08638442
02261642	_verb_group	01176232
00590518	_derivationally_related_form	10548227
07781207	_hypernym	07780627
02138441	_hypernym	02134971
09168592	_instance_hypernym	08505573
06938493	_hypernym	06937985
04476633	_hypernym	03829085
02484322	_hypernym	02469914
04018399	_hypernym	04395875
03552169	_hypernym	04423288
01652850	_member_meronym	01653026
09070793	_has_part	09071349
13138308	_derivationally_related_form	13138658
09117351	_has_part	09238425
09074431	_instance_hypernym	08638442
02641825	_member_meronym	02552737
01625747	_member_meronym	01627786
06128024	_hypernym	06125041
03155334	_hypernym	03800001
02156546	_derivationally_related_form	00230172
09053185	_has_part	09459557
01241594	_hypernym	01247647
13048666	_hypernym	11592146
08860123	_member_of_domain_region	15166742
00025728	_derivationally_related_form	14712036
00105778	_derivationally_related_form	06781383
13023292	_member_meronym	13024763
01886220	_member_meronym	02373093
04728376	_derivationally_related_form	02341266
02580577	_derivationally_related_form	10485440
08860123	_member_of_domain_usage	04135315
09679925	_hypernym	09678009
06845599	_member_of_domain_usage	15042542
03073832	_instance_hypernym	04511002
02398732	_member_meronym	02429695
09057311	_has_part	03634469
03912328	_hypernym	04522904
02330582	_member_meronym	02352390
02399000	_has_part	02399648
00016380	_also_see	00017282
03755545	_hypernym	03800001
02352390	_member_meronym	02353037
14299336	_hypernym	14299070
09110422	_has_part	09249418
09440186	_derivationally_related_form	00491689
08871007	_member_of_domain_region	01304121
08168531	_member_meronym	09648309
00431005	_derivationally_related_form	10224098
07703743	_hypernym	07703333
02324850	_hypernym	02324045
13208705	_hypernym	11545714
08780881	_has_part	08785343
02062209	_derivationally_related_form	02689973
02507337	_member_meronym	02507649
02708707	_derivationally_related_form	10744164
14861042	_hypernym	15016852
08028623	_instance_hypernym	08392137
08860123	_member_of_domain_region	08254055
02705201	_derivationally_related_form	02618468
08783286	_instance_hypernym	08782627
06845599	_member_of_domain_usage	14748335
02175958	_derivationally_related_form	04988258
08897065	_has_part	09170788
00015303	_hypernym	00015498
09148970	_has_part	09321180
02072159	_hypernym	02069888
01245986	_derivationally_related_form	04947628
08871007	_member_of_domain_region	09867154
09343422	_instance_hypernym	09440186
01638482	_hypernym	01626134
08860123	_member_of_domain_region	10656969
06510977	_hypernym	06509210
08860123	_member_of_domain_region	10690421
01456939	_member_meronym	01457082
00426958	_derivationally_related_form	10746346
00680485	_hypernym	00680346
00962722	_derivationally_related_form	10527334
02394822	_member_meronym	02395003
08932568	_has_part	04496035
02654256	_member_meronym	02654609
03895866	_hypernym	02959942
01639369	_member_meronym	01647803
01645776	_hypernym	01639765
00880227	_derivationally_related_form	06695862
02655355	_member_meronym	02655523
06845599	_member_of_domain_usage	04416530
13344664	_derivationally_related_form	00891216
09137032	_has_part	09137451
09060768	_has_part	09422964
02174115	_derivationally_related_form	07380144
02429695	_member_meronym	02433796
00866505	_derivationally_related_form	07189411
08860123	_member_of_domain_region	10583790
06295235	_member_of_domain_usage	02936020
01480770	_derivationally_related_form	04248851
01889328	_member_meronym	01891145
00105554	_derivationally_related_form	10221312
09068444	_has_part	09453288
00443670	_derivationally_related_form	14883206
02330582	_member_meronym	02351518
00793037	_derivationally_related_form	09961739
08999482	_has_part	09001580
06845599	_member_of_domain_usage	03287459
03854065	_derivationally_related_form	10382825
02416519	_has_part	01325417
09050730	_has_part	09049599
00223983	_derivationally_related_form	00479176
01883212	_member_meronym	01883762
06845599	_member_of_domain_usage	03921337
14599641	_derivationally_related_form	02196690
10766492	_derivationally_related_form	01050896
08860123	_member_of_domain_region	09262690
02583211	_member_meronym	02584004
00980908	_derivationally_related_form	10023656
06845599	_member_of_domain_usage	04424003
08806897	_member_of_domain_region	09905050
01897991	_hypernym	05236029
08860123	_member_of_domain_region	01087740
00211396	_derivationally_related_form	14040846
02553196	_member_meronym	02619738
09738708	_derivationally_related_form	00410406
02341266	_also_see	00227507
02068735	_member_meronym	02068974
08723006	_has_part	08729452
02324045	_hypernym	02323902
03251533	_hypernym	03216828
02596888	_member_meronym	02597004
02502902	_member_meronym	02506466
04224671	_instance_hypernym	03007130
02389592	_verb_group	02389346
04049405	_derivationally_related_form	01354405
06845599	_member_of_domain_usage	03198637
03774842	_hypernym	02716866
01215421	_derivationally_related_form	05097845
01628450	_member_meronym	01638952
09044862	_member_of_domain_region	07722485
04683136	_derivationally_related_form	01273263
08860123	_member_of_domain_region	02841063
13381734	_hypernym	13377268
01873310	_hypernym	01871875
02324717	_member_meronym	02324850
06845599	_member_of_domain_usage	03214051
02733187	_derivationally_related_form	05556943
01876326	_hypernym	01874434
02660769	_member_meronym	02662081
02335349	_member_meronym	02342109
08873622	_has_part	08875369
09053019	_has_part	09129442
01503061	_has_part	02511633
04248851	_hypernym	04474466
09105821	_has_part	09478355
00848282	_hypernym	00848098
00891216	_derivationally_related_form	13344804
02440705	_member_meronym	02446512
03652932	_derivationally_related_form	01289155
00492706	_derivationally_related_form	14487731
03878963	_derivationally_related_form	01130607
02457249	_member_meronym	02457408
00089154	_hypernym	00088713
02112891	_derivationally_related_form	13428159
04577293	_hypernym	02792552
09039411	_has_part	09041371
07620145	_hypernym	07612632
04568557	_hypernym	04474466
00190999	_derivationally_related_form	13426376
08860123	_member_of_domain_region	07631511
09129442	_has_part	09129926
01471070	_member_meronym	01479937
01453852	_member_meronym	01457276
02604014	_member_meronym	02604342
13028070	_member_meronym	12963796
02649082	_member_meronym	02649218
06295235	_member_of_domain_usage	06630627
09071690	_has_part	09377861
09039411	_member_of_domain_region	08042856
00853958	_derivationally_related_form	06767777
01305241	_hypernym	01305542
08723006	_has_part	08727003
04473432	_has_part	02687992
09152944	_has_part	09438554
08714132	_instance_hypernym	08698126
00265094	_derivationally_related_form	14778019
12967504	_hypernym	11590783
01944617	_member_meronym	01944812
08871007	_has_part	08877807
02373843	_member_meronym	02390101
02623170	_member_meronym	02629435
13053450	_member_meronym	13053608
07891726	_derivationally_related_form	01176567
08780881	_member_of_domain_region	01302935
08860123	_member_of_domain_region	10146559
06966825	_hypernym	06963951
03910033	_hypernym	02716866
10618848	_derivationally_related_form	00298041
01531265	_hypernym	01531742
01081456	_derivationally_related_form	02434541
08812952	_has_part	08813264
02521916	_member_meronym	02522990
01289155	_derivationally_related_form	03652932
08340153	_member_meronym	08133189
04412550	_hypernym	02698769
01652850	_hypernym	01626600
10182913	_derivationally_related_form	01201422
02335363	_derivationally_related_form	10132145
02127808	_hypernym	02120997
07443210	_derivationally_related_form	00419375
06778102	_derivationally_related_form	10117267
01287431	_instance_hypernym	00955060
06845599	_member_of_domain_usage	04480625
06147873	_hypernym	06147522
02105990	_derivationally_related_form	07512465
02600298	_hypernym	02599958
02332445	_derivationally_related_form	06344461
08873622	_has_part	08876773
09102016	_has_part	09102517
12045514	_hypernym	12041446
06845599	_member_of_domain_usage	03922561
06845599	_member_of_domain_usage	03804048
08541609	_derivationally_related_form	00409281
08860123	_member_of_domain_region	07573241
08029421	_instance_hypernym	08235343
02335349	_member_meronym	02345213
06967529	_hypernym	06963951
09044862	_has_part	09071690
13010401	_hypernym	11592146
02563497	_member_meronym	02563949
01493380	_derivationally_related_form	08615638
09141526	_has_part	09142771
00443670	_derivationally_related_form	11410298
09295576	_instance_hypernym	09403734
02346823	_member_meronym	02347443
09155306	_has_part	09155692
04947186	_hypernym	04946877
09327881	_has_part	09465135
02322596	_derivationally_related_form	10194566
01547832	_hypernym	01546921
09084750	_has_part	09085334
08860123	_member_of_domain_region	13408641
01610101	_derivationally_related_form	04081044
01445597	_derivationally_related_form	02329401
02660769	_member_meronym	02663086
02362194	_hypernym	02355227
09138935	_has_part	09139380
09126305	_has_part	09127461
06295235	_member_of_domain_usage	08404895
10619176	_derivationally_related_form	08368308
13205482	_member_meronym	13212751
08860123	_member_of_domain_region	08874469
02590237	_member_meronym	02591493
02434541	_derivationally_related_form	01081456
01628450	_member_meronym	01633047
00266197	_derivationally_related_form	13538757
09141526	_has_part	09286318
07036862	_hypernym	07035870
09141526	_has_part	09146111
13559409	_hypernym	13560417
00883226	_derivationally_related_form	07230227
08860123	_member_of_domain_region	03042697
09754051	_derivationally_related_form	00245289
08860123	_member_of_domain_region	06598244
02617029	_member_meronym	02617689
02503517	_hypernym	02503127
08125420	_hypernym	08337324
03497657	_derivationally_related_form	02363128
00126721	_derivationally_related_form	01082290
02328270	_member_meronym	02328429
08366202	_derivationally_related_form	10618848
09044862	_has_part	09070487
02322596	_derivationally_related_form	10663315
09719430	_hypernym	07967382
08766988	_member_of_domain_region	08475722
08860123	_member_of_domain_region	13298935
12039743	_member_meronym	12082593
01084180	_derivationally_related_form	02234551
09067277	_has_part	09068320
01437805	_member_meronym	01448767
09368224	_derivationally_related_form	02608004
03057075	_derivationally_related_form	06789411
08723006	_has_part	08727606
10788852	_derivationally_related_form	02590910
02641608	_member_meronym	02647503
00593837	_derivationally_related_form	10211203
02457756	_member_meronym	02458135
01465994	_member_meronym	01471070
02934594	_derivationally_related_form	05558345
09053185	_has_part	09054350
00482180	_derivationally_related_form	01253778
08860123	_member_of_domain_region	07677860
13055009	_hypernym	11592146
09126305	_has_part	09388318
01888520	_member_meronym	01889328
10224098	_derivationally_related_form	00427580
15049594	_derivationally_related_form	02069888
09044862	_has_part	09129442
02546075	_derivationally_related_form	07295629
08860123	_member_of_domain_region	08153874
00962129	_derivationally_related_form	10210137
06214744	_derivationally_related_form	02874876
03491724	_derivationally_related_form	02485631
06845599	_member_of_domain_usage	03807895
09159003	_has_part	09222880
03998525	_hypernym	02721160
06201908	_derivationally_related_form	00680145
09702134	_hypernym	09701148
08786855	_has_part	04407844
13074084	_hypernym	11590783
02553196	_member_meronym	02611425
00003826	_derivationally_related_form	14359459
02657083	_member_meronym	02663352
04078236	_hypernym	02721160
06845599	_member_of_domain_usage	03830582
14024882	_derivationally_related_form	00014742
06596179	_hypernym	06595351
11410298	_derivationally_related_form	00445940
01707306	_derivationally_related_form	07027458
00483656	_hypernym	00482180
08929922	_member_of_domain_region	13753585
09044862	_has_part	09102016
13024967	_member_meronym	13026146
02641608	_member_meronym	02648456
00505802	_derivationally_related_form	11449907
09109882	_instance_hypernym	08695539
00315383	_derivationally_related_form	01889074
09159003	_has_part	09139993
02457408	_hypernym	02456962
02423787	_member_meronym	02425228
00627849	_also_see	00629997
04989657	_derivationally_related_form	02183787
01453852	_member_meronym	01454260
02641825	_member_meronym	02646985
09238425	_instance_hypernym	09403734
02399000	_has_part	02399791
01546660	_member_meronym	01551430
13298701	_hypernym	13298011
09141526	_has_part	09144117
13054211	_member_meronym	13057845
02121620	_hypernym	02120997
10564800	_derivationally_related_form	02463990
02657805	_member_meronym	02658381
09060768	_has_part	09243209
02590237	_member_meronym	02591757
14752057	_hypernym	14751417
03697109	_hypernym	04329477
08860123	_member_of_domain_region	00479734
07781319	_hypernym	07775905
10659393	_derivationally_related_form	01323518
08812952	_has_part	08813156
13211516	_member_meronym	13212025
13428159	_derivationally_related_form	02112891
03804048	_hypernym	03828465
07711471	_hypernym	07738353
08570758	_derivationally_related_form	01081852
09044862	_has_part	09057311
09243209	_instance_hypernym	09328904
02593863	_member_meronym	02594250
09407043	_derivationally_related_form	00025654
08780881	_has_part	08787049
08860123	_member_of_domain_region	00162236
13205482	_member_meronym	13211516
14713748	_hypernym	14712692
08860123	_member_of_domain_region	03191776
02065932	_member_meronym	02066086
09407043	_derivationally_related_form	00419685
01972131	_hypernym	01971280
02621107	_member_meronym	02621258
08860123	_member_of_domain_region	07620485
01625747	_member_meronym	01628148
02486261	_hypernym	02484473
03763968	_hypernym	04509592
10607933	_hypernym	10024119
01546921	_hypernym	01524359
02537847	_member_meronym	02538406
00323856	_derivationally_related_form	07588947
02131418	_member_meronym	02131942
00793037	_hypernym	01041762
13060451	_member_meronym	13062630
09060768	_has_part	09289913
02616705	_member_meronym	02616851
01950502	_derivationally_related_form	10261388
13059485	_hypernym	11592146
09044862	_has_part	09108164
08124971	_hypernym	08339939
02415253	_hypernym	02414578
08665504	_has_part	08541130
08761244	_member_of_domain_region	01282466
01639765	_hypernym	01627424
09152944	_has_part	09154178
01268112	_derivationally_related_form	14974264
01585759	_derivationally_related_form	01244593
02430191	_derivationally_related_form	08305942
09057311	_has_part	09058219
07424109	_derivationally_related_form	00125633
02339376	_hypernym	02338901
10071332	_derivationally_related_form	00416399
08860123	_member_of_domain_region	03974671
02627686	_member_meronym	02627835
09044862	_member_of_domain_region	13753274
02039156	_derivationally_related_form	00341548
05426989	_has_part	05455690
02072209	_member_meronym	02072355
01650509	_member_meronym	01650901
09067277	_has_part	09423379
06845599	_member_of_domain_usage	02989475
00619183	_derivationally_related_form	00992331
09044862	_member_of_domain_region	15187077
09023321	_has_part	09026911
09138935	_has_part	09139849
08457976	_derivationally_related_form	02797021
08570758	_has_part	08571275
01439657	_member_meronym	01439808
08860123	_member_of_domain_region	10718509
09023321	_has_part	09027853
05426989	_hypernym	05426243
12968882	_member_meronym	12969131
08897065	_has_part	08899149
15142836	_derivationally_related_form	01186428
10023656	_derivationally_related_form	00980908
08215248	_derivationally_related_form	02031622
09078231	_member_of_domain_region	04506289
13212025	_hypernym	13211790
08860123	_member_of_domain_region	09830400
06295235	_member_of_domain_usage	03966976
08860123	_member_of_domain_region	10669236
08385009	_derivationally_related_form	02485844
08095647	_member_meronym	08096301
03587442	_hypernym	03783017
01322854	_derivationally_related_form	09884133
08849753	_has_part	09425835
01640567	_member_meronym	01641739
06295235	_member_of_domain_usage	04611654
02373843	_member_meronym	02391049
10527334	_derivationally_related_form	00963283
09023321	_has_part	09026780
09863749	_derivationally_related_form	00409281
02639312	_member_meronym	02639464
06814870	_has_part	06862202
02599557	_hypernym	02599052
01354006	_derivationally_related_form	04159354
00058265	_derivationally_related_form	02412440
00058645	_derivationally_related_form	02395406
08801678	_has_part	08801364
02121234	_member_meronym	02125689
01954852	_hypernym	01953810
01641206	_hypernym	01640846
08723006	_member_of_domain_region	06930934
02751782	_hypernym	02832168
08321469	_hypernym	08472335
06845599	_member_of_domain_usage	03755545
02627686	_member_meronym	02628259
08941208	_instance_hypernym	08939562
15166462	_has_part	15169421
00015303	_derivationally_related_form	00858849
03075097	_has_part	04452848
01639071	_hypernym	01626600
01385920	_derivationally_related_form	09307300
02553196	_member_meronym	02559232
01094086	_derivationally_related_form	07472929
00680346	_derivationally_related_form	06201908
08368308	_derivationally_related_form	10619176
10163723	_derivationally_related_form	02332445
01543731	_derivationally_related_form	04081044
12975207	_member_meronym	12975982
02440705	_member_meronym	02444103
00883226	_derivationally_related_form	06889591
09076675	_instance_hypernym	08695539
02582437	_member_meronym	02582591
01186428	_derivationally_related_form	00842692
13023292	_member_meronym	13028070
09152944	_has_part	09153570
13460568	_derivationally_related_form	00366858
08910668	_has_part	09333706
08897065	_member_of_domain_region	08012028
09148970	_has_part	09192708
01567888	_derivationally_related_form	08438533
03772269	_derivationally_related_form	01639105
10211203	_derivationally_related_form	00593837
08615374	_derivationally_related_form	00492677
10350220	_hypernym	10079893
00651954	_derivationally_related_form	01954852
00625393	_derivationally_related_form	04762355
03922412	_hypernym	02718469
08015731	_instance_hypernym	08392137
02640857	_has_part	07799738
00700652	_derivationally_related_form	10489944
09131654	_has_part	09206375
00704305	_derivationally_related_form	00643197
02367131	_member_meronym	02367678
08860123	_member_of_domain_region	13363970
00088725	_derivationally_related_form	01215421
14732946	_hypernym	14728724
02502085	_member_meronym	02502212
13019202	_hypernym	11592146
02119961	_member_meronym	02120079
02545687	_member_meronym	02545841
01954852	_derivationally_related_form	02792552
06845599	_member_of_domain_usage	02748618
02507337	_member_meronym	02509405
09678009	_derivationally_related_form	08082236
08860123	_member_of_domain_region	08325530
01587575	_derivationally_related_form	14881303
08860123	_member_of_domain_region	00504975
06845599	_member_of_domain_usage	04535634
09152944	_has_part	08564739
06295235	_member_of_domain_usage	04272054
10075529	_derivationally_related_form	06757891
08860123	_member_of_domain_region	15200661
01546660	_member_meronym	01552956
02575766	_member_meronym	02577532
09138935	_has_part	08502797
05949937	_derivationally_related_form	00680145
06630627	_hypernym	06630017
04492856	_hypernym	03582305
08860123	_member_of_domain_region	07913081
01176567	_derivationally_related_form	07891726
06845599	_member_of_domain_usage	04470037
01594362	_derivationally_related_form	04300080
00980908	_derivationally_related_form	06790042
02534352	_member_meronym	02535909
08564307	_has_part	09099526
08723006	_instance_hypernym	08700255
03600285	_hypernym	04489008
09044862	_has_part	09048880
01604251	_derivationally_related_form	04108268
08782976	_instance_hypernym	08782627
01542207	_derivationally_related_form	00329619
08860123	_member_of_domain_region	10506915
06696483	_derivationally_related_form	02546075
02136285	_hypernym	02135220
01142761	_derivationally_related_form	02324045
01886220	_member_meronym	01888520
15273626	_derivationally_related_form	00015498
09044862	_member_of_domain_region	08122141
02354536	_derivationally_related_form	04595855
02553196	_member_meronym	02586382
08860123	_member_of_domain_region	14685641
10663315	_derivationally_related_form	02554235
02335349	_member_meronym	02338592
06018465	_hypernym	06018022
04497570	_hypernym	03045337
09458587	_has_part	09396275
08860123	_member_of_domain_region	02828648
05426989	_has_part	05455912
01243474	_derivationally_related_form	01758308
03138534	_hypernym	08677801
14886579	_hypernym	15015501
04443257	_derivationally_related_form	04442831
06295235	_member_of_domain_usage	04450749
08174398	_member_meronym	08764107
01680132	_hypernym	01679980
09039411	_member_of_domain_region	01277288
09680504	_hypernym	09679925
00419685	_hypernym	00419375
06845599	_member_of_domain_usage	04078236
09333706	_instance_hypernym	09328904
09155306	_has_part	09157021
02600135	_member_meronym	02600503
04442831	_hypernym	14991927
13064852	_hypernym	11592146
02655020	_derivationally_related_form	00263682
03540267	_hypernym	03381126
06845599	_member_of_domain_usage	03174211
02346315	_member_meronym	02366702
06295235	_member_of_domain_usage	03324928
13498404	_derivationally_related_form	00088713
15227846	_has_part	15228162
09159003	_has_part	08610305
13027190	_hypernym	11590783
15022776	_hypernym	14736359
08805122	_has_part	08805565
09137032	_member_of_domain_region	07689217
07961270	_hypernym	07961016
09148970	_has_part	09398217
00629997	_also_see	00627849
12039743	_member_meronym	12084746
08340153	_member_meronym	08197386
02482820	_member_meronym	02483092
06845599	_member_of_domain_usage	03817062
01648001	_member_meronym	01648139
02435689	_member_meronym	02436067
08849753	_has_part	09353437
02332755	_hypernym	02330245
09148970	_has_part	09150863
01871699	_member_meronym	01873007
02134589	_member_meronym	02136901
02434541	_derivationally_related_form	14418822
12979478	_hypernym	11594676
08860123	_member_of_domain_region	06792526
12972414	_member_meronym	12972629
02503313	_member_meronym	02503517
09158024	_instance_hypernym	08695539
02183787	_derivationally_related_form	02009280
02597173	_member_meronym	02597367
09023321	_has_part	09435065
09313241	_instance_hypernym	09476331
01186428	_derivationally_related_form	03836062
00297906	_derivationally_related_form	15129927
07883384	_hypernym	07883251
01643374	_member_meronym	01643507
02710766	_derivationally_related_form	00021065
01193099	_derivationally_related_form	00510723
10293861	_hypernym	10271677
10525617	_derivationally_related_form	02379753
01471070	_member_meronym	02514575
08124649	_hypernym	08337324
00374668	_derivationally_related_form	02863750
14412882	_derivationally_related_form	01194238
09117351	_has_part	09118313
00410406	_derivationally_related_form	02927512
12039743	_member_meronym	12078954
09093608	_has_part	09243405
01041762	_derivationally_related_form	05978623
02133512	_member_meronym	02133704
06845599	_member_of_domain_usage	03371532
02445715	_hypernym	02441326
02553196	_member_meronym	02554512
06845599	_member_of_domain_usage	14886579
13010219	_member_meronym	13010401
02355711	_member_meronym	02357741
13298011	_hypernym	13296899
04473432	_derivationally_related_form	01853696
01888520	_member_meronym	01891438
00848466	_derivationally_related_form	00751389
03093184	_derivationally_related_form	09378529
06413889	_derivationally_related_form	06256229
01452633	_member_meronym	01452798
08860123	_member_of_domain_region	00637145
02430045	_has_part	02158739
03130073	_derivationally_related_form	06961557
02651846	_member_meronym	02652132
09084750	_has_part	09086070
07618871	_hypernym	07612632
01438720	_member_meronym	01439514
03757428	_hypernym	02723292
12992464	_member_meronym	11594676
09129442	_has_part	09340644
00855295	_derivationally_related_form	06777794
03075097	_derivationally_related_form	00038365
02722458	_derivationally_related_form	02629410
13063046	_member_meronym	13063269
00625393	_derivationally_related_form	04761212
15166742	_hypernym	15166462
02459808	_member_meronym	02461014
08860123	_member_of_domain_region	13282419
14299070	_derivationally_related_form	00091124
08780881	_member_of_domain_region	09498497
10160624	_derivationally_related_form	01706889
03246454	_derivationally_related_form	01985923
04580777	_instance_hypernym	03449564
06310945	_hypernym	06309383
01439808	_hypernym	01439514
08665504	_derivationally_related_form	08672199
02832168	_hypernym	02854156
09133010	_has_part	08564739
03933529	_derivationally_related_form	01305361
01885032	_member_meronym	01885158
10619176	_derivationally_related_form	06218459
02663657	_member_meronym	02665119
00025654	_derivationally_related_form	04072811
02542162	_member_meronym	02542283
08013453	_instance_hypernym	08392137
02575168	_member_meronym	02575325
07644382	_has_part	07647870
01642671	_member_meronym	01642943
01309143	_derivationally_related_form	10563826
06695579	_hypernym	06695227
09152944	_has_part	09313241
12039743	_member_meronym	12054902
00904046	_derivationally_related_form	00923321
06845599	_member_of_domain_usage	03757428
10207514	_derivationally_related_form	00086835
03216828	_derivationally_related_form	01305731
14751417	_hypernym	14745635
01478511	_hypernym	01474283
02395406	_derivationally_related_form	02615739
10765189	_derivationally_related_form	01268112
06845599	_member_of_domain_usage	03556281
02064816	_hypernym	02063224
06295235	_member_of_domain_usage	04446162
00891216	_derivationally_related_form	13344664
02396427	_has_part	01465713
01861465	_member_meronym	02370525
09126305	_has_part	09127844
08553535	_has_part	08549733
08860123	_member_of_domain_region	10753182
08999482	_has_part	09170294
08860123	_member_of_domain_region	08325851
00230172	_derivationally_related_form	00427397
00596393	_derivationally_related_form	10464542
09148970	_has_part	09151800
02440705	_member_meronym	02449464
02446819	_derivationally_related_form	10211203
08860123	_member_of_domain_region	03769967
08860123	_member_of_domain_region	15170786
02687992	_has_part	04120842
01428155	_member_meronym	02543412
01472502	_has_part	01472939
05284333	_has_part	05473104
06845599	_member_of_domain_usage	02706373
02685299	_derivationally_related_form	02991048
14739360	_hypernym	14607521
00842997	_derivationally_related_form	01186428
14070360	_hypernym	14061805
02553196	_member_meronym	02575766
08860123	_member_of_domain_region	03663433
00328128	_derivationally_related_form	03612814
00215838	_hypernym	00215683
09023321	_member_meronym	09692250
00858849	_derivationally_related_form	00015303
09103943	_member_of_domain_region	01298797
09307300	_derivationally_related_form	01385920
02469588	_member_meronym	02496576
02601921	_hypernym	02601344
08860123	_member_of_domain_region	05611684
02642107	_hypernym	02552171
00147862	_derivationally_related_form	00419375
08311687	_hypernym	08310949
00103317	_derivationally_related_form	04112752
02457586	_member_meronym	02457756
02640626	_hypernym	02640242
08766988	_has_part	08772551
01880937	_member_meronym	01881991
09052835	_has_part	09137869
09498497	_synset_domain_topic_of	06371413
13049285	_member_meronym	13049561
02009280	_derivationally_related_form	04989657
06593803	_has_part	06391766
01660386	_derivationally_related_form	03792048
00015303	_also_see	00017282
10452892	_hypernym	10470779
03075191	_derivationally_related_form	08910668
00086835	_derivationally_related_form	04517535
01650690	_hypernym	01650167
04107984	_derivationally_related_form	01543731
09130076	_has_part	09130452
01480715	_member_meronym	01480880
06845599	_member_of_domain_usage	04034884
03702719	_hypernym	04049405
09048880	_has_part	09111366
10146927	_derivationally_related_form	00900583
02551824	_member_meronym	02641608
06845599	_member_of_domain_usage	02989178
08029908	_instance_hypernym	08392137
08860123	_member_of_domain_region	07590611
02441723	_member_meronym	02441942
02234781	_also_see	02236842
15164957	_has_part	15165289
02626762	_hypernym	02623445
08605261	_instance_hypernym	08600992
06845599	_member_of_domain_usage	04034641
01646528	_derivationally_related_form	14485064
06295235	_member_of_domain_usage	01043333
12971157	_hypernym	11590783
00458471	_derivationally_related_form	13559409
08764107	_has_part	08765623
09710164	_derivationally_related_form	03016202
01650509	_member_meronym	01650690
01638611	_hypernym	01626600
09331328	_instance_hypernym	09328904
00223854	_derivationally_related_form	01322854
02074915	_member_meronym	02134589
06696025	_hypernym	06695579
00605310	_derivationally_related_form	10118382
13062112	_member_meronym	13062272
06295235	_member_of_domain_usage	04508489
03612814	_derivationally_related_form	00328128
02339768	_member_meronym	02340186
02628856	_member_meronym	02629230
14040846	_derivationally_related_form	00211396
08504594	_hypernym	08683548
08929922	_member_of_domain_region	01271428
01649948	_member_meronym	01651900
08766988	_has_part	08774374
14974264	_derivationally_related_form	01268112
08627919	_hypernym	08537837
01167780	_derivationally_related_form	03199647
06845599	_member_of_domain_usage	03328392
04159058	_derivationally_related_form	01353405
08723006	_has_part	08722844
12039743	_member_meronym	12046251
09863936	_derivationally_related_form	02875499
08933940	_instance_hypernym	08641113
03599628	_derivationally_related_form	02420789
03475118	_instance_hypernym	03800563
12967281	_hypernym	11594676
09133010	_has_part	09133895
12983404	_hypernym	11592146
02621721	_member_meronym	02621908
08723006	_has_part	08724726
08261589	_hypernym	08256968
01253778	_derivationally_related_form	00482180
08761244	_has_part	08951957
01454702	_member_meronym	01454856
01392080	_derivationally_related_form	01896031
09108164	_has_part	09108728
10538733	_hypernym	09972661
02470685	_derivationally_related_form	14418822
04842993	_derivationally_related_form	02105990
06781383	_hypernym	06780882
02469588	_member_meronym	02500749
01268457	_instance_hypernym	00958477
13035521	_member_meronym	13035707
08806897	_has_part	04224671
06295235	_member_of_domain_usage	03504420
01349493	_derivationally_related_form	07351909
01503061	_derivationally_related_form	01139865
10183757	_derivationally_related_form	02546075
03946532	_hypernym	03910033
08672199	_derivationally_related_form	08665504
02588108	_member_meronym	02588580
01696135	_derivationally_related_form	04683136
02373843	_member_meronym	02389346
01672607	_derivationally_related_form	04794751
04473432	_has_part	02898711
13057845	_hypernym	11592146
01889328	_member_meronym	01890718
02607630	_member_meronym	02609169
08860123	_member_of_domain_region	04229107
09148970	_has_part	09150047
02348788	_hypernym	02331309
02610541	_member_meronym	02610664
06845599	_member_of_domain_usage	03747103
12039743	_member_meronym	12080199
13802098	_synset_domain_topic_of	06969129
06295235	_member_of_domain_usage	02800793
08860123	_member_of_domain_region	10242791
06845599	_member_of_domain_usage	14713748
08149781	_derivationally_related_form	02794372
13031956	_member_meronym	13032381
13384877	_derivationally_related_form	09934921
02722458	_hypernym	03157987
08896645	_instance_hypernym	09388848
10318892	_derivationally_related_form	00550016
02063224	_hypernym	02062744
03224032	_has_part	02977619
02328662	_member_meronym	02328942
08860123	_member_of_domain_region	13393427
00510723	_derivationally_related_form	01193099
02351518	_member_meronym	02351870
01900488	_derivationally_related_form	02884456
02346627	_has_part	01900837
08780881	_has_part	09378529
09052835	_has_part	09126305
03863262	_hypernym	03121897
08933287	_instance_hypernym	08641113
13205482	_member_meronym	13208468
02074915	_member_meronym	02075727
01273016	_derivationally_related_form	06855207
08860123	_member_of_domain_region	10675481
04335435	_derivationally_related_form	01945183
00899597	_hypernym	00897241
06777794	_hypernym	06777687
08860123	_member_of_domain_region	15222686
01888520	_member_meronym	01889074
03460674	_hypernym	03910033
01648818	_member_meronym	01649170
06845599	_member_of_domain_usage	04100994
02553196	_member_meronym	02621107
08999482	_member_meronym	09693372
00015806	_hypernym	00014742
06960566	_derivationally_related_form	02957823
01724185	_derivationally_related_form	10318892
08860123	_member_of_domain_region	03040836
08860123	_member_of_domain_region	07613671
08806897	_member_of_domain_region	09823287
02701445	_derivationally_related_form	04236001
08860123	_member_of_domain_region	04520480
02453890	_member_meronym	02459808
02353709	_member_meronym	02354320
02647503	_member_meronym	02647903
06845599	_member_of_domain_usage	02996249
01354405	_derivationally_related_form	04049405
08860123	_member_of_domain_region	15160866
04370288	_hypernym	04489008
01643657	_derivationally_related_form	04485226
02629435	_member_meronym	02629581
14919272	_derivationally_related_form	00086835
09935233	_derivationally_related_form	01639105
08800258	_instance_hypernym	08557482
01547390	_hypernym	01547001
00883635	_derivationally_related_form	07229747
08790495	_has_part	08787240
02329093	_member_meronym	02354950
04438304	_derivationally_related_form	00702226
00190023	_derivationally_related_form	00390198
09071690	_has_part	09200649
01186428	_derivationally_related_form	01058870
02547213	_member_meronym	02547947
01241594	_derivationally_related_form	00904878
08340153	_has_part	08340753
01654429	_hypernym	01626600
01635176	_derivationally_related_form	06367107
06352782	_hypernym	06351613
00086835	_derivationally_related_form	10207514
08860123	_member_of_domain_region	10511960
00408852	_hypernym	00411547
10082146	_hypernym	10247044
06845599	_member_of_domain_usage	03296759
10531227	_derivationally_related_form	08416652
02120692	_member_meronym	02130190
01896031	_hypernym	14755804
09044862	_has_part	09052652
08911421	_instance_hypernym	08691669
02639605	_hypernym	02638596
06960566	_hypernym	06960298
12972966	_member_meronym	12973541
06845599	_member_of_domain_usage	04535826
01640383	_hypernym	01626134
03906590	_hypernym	03904183
01130607	_derivationally_related_form	04547592
02488149	_member_meronym	02488291
12039743	_member_meronym	12050295
02325884	_hypernym	02325366
08780881	_has_part	08790748
08860123	_member_of_domain_region	03963483
12965209	_member_meronym	12965463
06845599	_member_of_domain_usage	03918297
01778017	_derivationally_related_form	02011810
09992538	_derivationally_related_form	02485844
03818090	_hypernym	02716866
09260466	_derivationally_related_form	00443670
09044862	_has_part	09131654
00058265	_derivationally_related_form	07667151
02528534	_member_meronym	02542598
02527813	_member_meronym	02551824
04006727	_hypernym	03681148
08365855	_derivationally_related_form	00408852
03881534	_hypernym	03141065
02072159	_derivationally_related_form	00329819
00508952	_has_part	01245813
09044862	_member_of_domain_region	08546870
10210137	_hypernym	10527334
01881991	_member_meronym	01882125
10583250	_derivationally_related_form	02540670
09023321	_has_part	09025728
02402409	_hypernym	02405252
00360242	_derivationally_related_form	01560369
01480149	_verb_group	01480469
09103217	_instance_hypernym	08665504
02794372	_derivationally_related_form	08149781
06207561	_derivationally_related_form	01778568
02930766	_derivationally_related_form	01949007
08801678	_member_of_domain_region	07781801
06371413	_hypernym	06369829
01302086	_has_part	01288272
09044862	_has_part	09117351
13206584	_member_meronym	13206817
01944955	_hypernym	01944390
10783734	_derivationally_related_form	00505802
02440705	_member_meronym	02448200
09068444	_has_part	09069415
09114696	_has_part	09295576
15122231	_derivationally_related_form	00297906
01645278	_member_meronym	01645466
03469175	_hypernym	03962525
13012613	_member_meronym	13013187
09067277	_has_part	09407632
09071690	_has_part	09073258
02573918	_member_meronym	02574093
00245289	_derivationally_related_form	13556509
02136271	_derivationally_related_form	02009280
03497657	_has_part	03138534
01669643	_derivationally_related_form	04606014
00485711	_also_see	01672607
07230089	_derivationally_related_form	00883226
01633949	_member_meronym	01634392
06295235	_member_of_domain_usage	03348454
10024119	_hypernym	10582154
02657083	_member_meronym	02657805
02461372	_member_meronym	02461556
08780881	_has_part	08783812
01004961	_derivationally_related_form	00491689
12998349	_member_meronym	13070003
02373843	_member_meronym	02390454
01169067	_derivationally_related_form	10132988
02424305	_hypernym	02419796
03654086	_hypernym	02724966
09058219	_instance_hypernym	08638442
08871007	_has_part	08873622
02989685	_hypernym	02996840
08860123	_member_of_domain_region	03586631
08029421	_instance_hypernym	08392137
01437805	_member_meronym	01446283
00431005	_derivationally_related_form	00853633
01453852	_member_meronym	01457576
02593863	_member_meronym	02598438
09099526	_has_part	09100690
08860123	_member_of_domain_region	07620327
08860123	_member_of_domain_region	07468244
01645634	_member_meronym	01645776
13246662	_hypernym	13246475
08723006	_has_part	08725454
01452496	_member_meronym	01453188
06937985	_hypernym	06937768
09155306	_has_part	09155986
05556943	_derivationally_related_form	00132385
02562085	_member_meronym	02562315
02494866	_member_meronym	02495242
12996225	_member_meronym	13038944
01271658	_derivationally_related_form	04085873
00341548	_derivationally_related_form	02039156
02652335	_member_meronym	02654256
02329093	_member_meronym	02346315
01428155	_member_meronym	01437805
02074004	_member_meronym	02074542
09044862	_member_of_domain_region	13753740
02554512	_member_meronym	02637637
00105778	_hypernym	00105554
00626800	_derivationally_related_form	04760771
09328904	_has_part	09313716
02353529	_member_meronym	02354470
09063673	_has_part	09066948
02331479	_member_meronym	02332315
02425393	_member_meronym	02425532
09108164	_has_part	09482131
13000372	_member_meronym	13006741
08860123	_member_of_domain_region	07676967
08860123	_member_of_domain_region	08319198
08929922	_member_of_domain_region	13752911
09060768	_has_part	09170996
01542207	_derivationally_related_form	15049594
05558345	_derivationally_related_form	02934594
02606926	_member_meronym	02607072
14747338	_hypernym	14745635
08766988	_has_part	08775297
13418047	_hypernym	13417410
14752702	_hypernym	14751417
02262542	_derivationally_related_form	04733204
08253815	_derivationally_related_form	01167981
01465994	_member_meronym	01466996
12039743	_member_meronym	12059479
01466047	_derivationally_related_form	04029125
00299680	_derivationally_related_form	01604251
09044862	_member_of_domain_region	08168531
02542017	_hypernym	02541687
02431628	_hypernym	02430045
01643092	_hypernym	01626600
13573666	_derivationally_related_form	00459114
08800676	_member_meronym	09696124
01985029	_verb_group	01547001
01082290	_derivationally_related_form	08570758
08253815	_derivationally_related_form	01167780
06128307	_hypernym	06128024
02323715	_member_meronym	02326237
01642943	_hypernym	01639765
02797021	_derivationally_related_form	06621447
01653773	_hypernym	01639765
08860123	_member_of_domain_region	07569423
08174398	_member_meronym	08766988
06845599	_member_of_domain_usage	05408388
06845599	_member_of_domain_usage	04218383
02413131	_hypernym	02411705
02831724	_derivationally_related_form	02336947
01604251	_hypernym	01215421
04452848	_hypernym	04008947
01438720	_member_meronym	01442591
09147046	_has_part	09249418
02553196	_member_meronym	02635310
09884133	_derivationally_related_form	01322854
02398732	_member_meronym	02400139
06220616	_derivationally_related_form	00298041
09065328	_instance_hypernym	08638442
06845599	_member_of_domain_usage	03756624
06845599	_member_of_domain_usage	02996840
03036341	_hypernym	03036469
09068444	_has_part	09069190
00135285	_derivationally_related_form	06880664
14778019	_derivationally_related_form	00265094
06845599	_member_of_domain_usage	03299006
01883212	_member_meronym	01885367
06295235	_member_of_domain_usage	02896442
09102016	_has_part	09352108
08860123	_member_of_domain_region	13623054
08871007	_member_of_domain_region	10064229
01950502	_derivationally_related_form	02792552
02534352	_member_meronym	02534559
02952109	_derivationally_related_form	09428967
06880664	_derivationally_related_form	00624263
02132974	_member_meronym	02133161
14844693	_hypernym	14842992
00212790	_derivationally_related_form	13460568
01446589	_hypernym	01438208
12039743	_member_meronym	12044269
08860123	_member_of_domain_region	06700169
08860123	_member_of_domain_region	07066459
06845599	_member_of_domain_usage	03047353
08860123	_member_of_domain_usage	07674749
08860123	_member_of_domain_region	07800487
13720600	_hypernym	13716084
02011810	_derivationally_related_form	06207561
02989313	_hypernym	02996840
04694809	_derivationally_related_form	01532329
12998349	_member_meronym	12998815
08860123	_has_part	08887841
15160418	_hypernym	15159819
01448165	_member_meronym	01448291
01449586	_member_meronym	01449712
02971469	_derivationally_related_form	09700492
09117351	_has_part	09125629
08539893	_hypernym	08539717
02553196	_member_meronym	02562085
[truncated: 4,327 more rows]
