# Supplementary material
Source: ML conference proceedings conference paper supplement (https://proceedings.neurips.cc/paper_files/paper/2021/hash/0fd600c953cde8121262e322ef09f70e-Abstract.html)
Supplement: Supplementary file 1 [file 0fd600c953cde8121262e322ef09f70e-Supplemental.zip › Supplementary_Material_Paper_8745/data/GraIL-BM_WN18RR_v3/test/test-random-sample/test1.txt]

02521241	_member_meronym	02521916	1
13048666	_instance_hypernym	02502357	0
02341974	_hypernym	02339376	1
09142674	_hypernym	02062991	0
03109350	_instance_hypernym	04511002	1
05638778	_member_of_domain_region	02366825	0
00053609	_derivationally_related_form	00426958	1
01645093	_also_see	08250635	0
01631759	_hypernym	01626134	1
09772746	_has_part	09064594	0
08766988	_member_of_domain_region	09877443	1
04419315	_derivationally_related_form	02632239	0
01215137	_derivationally_related_form	06547832	1
08250635	_member_of_domain_region	01444164	0
02923510	_derivationally_related_form	06234825	1
07649463	_hypernym	07649463	0
08897065	_has_part	09168020	1
07649463	_synset_domain_topic_of	08012765	0
00014742	_hypernym	00014405	1
14604959	_hypernym	09084196	0
00211108	_derivationally_related_form	13460568	1
08250635	_verb_group	08122141	0
02354781	_hypernym	02353861	1
00088713	_derivationally_related_form	09268927	0
14894140	_hypernym	14727670	1
04993882	_synset_domain_topic_of	04441282	0
02441723	_member_meronym	02442845	1
09089782	_also_see	09058071	0
00963283	_derivationally_related_form	06790042	1
02398463	_instance_hypernym	00627437	0
02832818	_derivationally_related_form	02720201	1
15183802	_similar_to	02366825	0
01153305	_derivationally_related_form	00369194	1
01304121	_similar_to	09192973	0
02601589	_member_meronym	02601921	1
02682424	_member_of_domain_region	02630468	0
12043248	_member_meronym	12043444	1
01304121	_member_of_domain_usage	09877443	0
01269360	_instance_hypernym	00223983	1
09089782	_similar_to	06195698	0
00702226	_derivationally_related_form	04438304	1
13042814	_has_part	00052146	0
02399000	_derivationally_related_form	01174555	1
08505573	_verb_group	03198951	0
09044862	_has_part	09110422	1
10382825	_synset_domain_topic_of	02660769	0
02453890	_member_meronym	02457586	1
13030438	_verb_group	09693372	0
01292727	_hypernym	01292534	1
09959258	_has_part	09144117	0
02528534	_member_meronym	02540255	1
01439121	_also_see	03869222	0
02583139	_derivationally_related_form	00962129	1
00855295	_similar_to	01324799	0
02927512	_derivationally_related_form	09044862	1
09478355	_instance_hypernym	01439121	0
00492677	_also_see	02111684	1
01844859	_derivationally_related_form	02343772	0
02593863	_member_meronym	02595902	1
02650928	_synset_domain_topic_of	02343187	0
00210738	_derivationally_related_form	13077033	1
07851054	_member_meronym	00052146	0
09044862	_member_of_domain_region	08122009	1
01453330	_also_see	10641223	0
03299648	_hypernym	03214670	1
01304121	_hypernym	01293167	0
04300080	_derivationally_related_form	01594362	1
09192973	_derivationally_related_form	01290435	0
09401474	_instance_hypernym	09403734	1
10595361	_derivationally_related_form	12979129	0
09052652	_member_meronym	10802283	1
05385363	_has_part	02377480	0
02398854	_derivationally_related_form	10271677	1
03222959	_hypernym	03918297	0
06778102	_derivationally_related_form	00853633	1
09058071	_hypernym	09066948	0
03829085	_hypernym	02718811	1
02477890	_member_meronym	09472597	0
01478300	_member_meronym	01478511	1
01453188	_derivationally_related_form	08935212	0
12982723	_hypernym	11592146	1
02456147	_also_see	00356367	0
01454856	_hypernym	02552171	1
00459114	_also_see	02630052	0
02870092	_derivationally_related_form	06413889	1
00855295	_similar_to	00855295	0
04186848	_derivationally_related_form	01560369	1
09192973	_has_part	15183802	0
06845599	_member_of_domain_usage	02705651	1
14411243	_hypernym	00356367	0
01262936	_derivationally_related_form	07738353	1
00088713	_also_see	07380144	0
08564307	_has_part	09109444	1
00459114	_synset_domain_topic_of	08764561	0
01042764	_hypernym	01041968	1
02346627	_member_of_domain_region	02595702	0
08860123	_member_of_domain_region	04240576	1
08122141	_verb_group	02136285	0
09169801	_instance_hypernym	08505573	1
02653497	_member_of_domain_region	08764561	0
07450343	_derivationally_related_form	00855295	1
04947628	_hypernym	09332976	0
12972818	_hypernym	11594676	1
03198951	_member_meronym	02136285	0
14607521	_derivationally_related_form	00264875	1
09234104	_has_part	02630052	0
15155220	_has_part	15227846	1
02346627	_also_see	09066948	0
09131654	_has_part	09244972	1
02136285	_also_see	02952109	0
05588174	_derivationally_related_form	02884456	1
08935212	_member_meronym	00052146	0
09714120	_derivationally_related_form	08953324	1
09545324	_instance_hypernym	02343187	0
09141526	_has_part	09145083	1
02457408	_instance_hypernym	08549480	0
01639369	_member_meronym	01642671	1
00627437	_synset_domain_topic_of	01844859	0
00626800	_also_see	00625393	1
06310945	_synset_domain_topic_of	04438742	0
06845599	_member_of_domain_usage	04006727	1
00089657	_member_of_domain_usage	13042814	0
08381820	_hypernym	08381636	1
02398463	_similar_to	01439121	0
07556637	_derivationally_related_form	01167188	1
08095647	_also_see	09053019	0
00854150	_derivationally_related_form	10221312	1
14604959	_has_part	07842753	0
08136260	_hypernym	08348815	1
07649463	_member_meronym	02513742	0
10181990	_hypernym	10024119	1
04947628	_member_of_domain_region	08396537	0
08860123	_member_of_domain_region	02463990	1
09877443	_derivationally_related_form	06883073	0
06845599	_member_of_domain_usage	03771066	1
09313716	_verb_group	14411243	0
06621447	_derivationally_related_form	02797021	1
02553196	_synset_domain_topic_of	04107984	0
12992464	_member_meronym	12975207	1
02595702	_has_part	03922412	0
09682291	_derivationally_related_form	02923510	1
13753740	_derivationally_related_form	10550090	0
02424085	_hypernym	02419796	1
08726463	_member_of_domain_region	00918471	0
09119277	_has_part	09370383	1
08764561	_member_meronym	03222959	0
08860123	_member_of_domain_region	07722485	1
01821634	_has_part	01304121	0
14487731	_derivationally_related_form	00492706	1
04349701	_also_see	02682424	0
04762355	_derivationally_related_form	00625393	1
01885367	_also_see	03869222	0
13016457	_member_meronym	13001743	1
04242704	_has_part	04993882	0
01303582	_instance_hypernym	00962722	1
03869222	_derivationally_related_form	13753740	0
02536165	_has_part	07796165	1
09772746	_has_part	03962525	0
02601344	_has_part	07784367	1
01547001	_derivationally_related_form	02377480	0
08416652	_hypernym	08251877	1
09397391	_similar_to	03198951	0
00963283	_derivationally_related_form	00963241	1
09084196	_member_of_domain_region	13533470	0
02176747	_hypernym	02176261	1
02595702	_similar_to	03922412	0
06214580	_derivationally_related_form	10619176	1
02136285	_derivationally_related_form	00356367	0
07689217	_hypernym	07689003	1
00052146	_member_of_domain_usage	02509197	0
12970379	_member_meronym	12970560	1
00585810	_similar_to	01084180	0
10244913	_hypernym	09770949	1
04418644	_member_of_domain_region	10382825	0
08780881	_member_of_domain_region	07036862	1
09472597	_member_of_domain_usage	08804487	0
02066450	_member_meronym	02068735	1
02630052	_also_see	01547001	0
09117351	_has_part	09123809	1
01294791	_instance_hypernym	08851034	0
04352070	_hypernym	02716205	1
09091398	_member_of_domain_region	08787466	0
13007417	_hypernym	12998815	1
04419315	_verb_group	10460033	0
03854065	_hypernym	04586932	1
07842753	_member_of_domain_usage	02502357	0
13002433	_member_meronym	13003522	1
09313716	_hypernym	15183802	0
02655523	_hypernym	02652668	1
00223854	_member_of_domain_region	07775905	0
01245813	_derivationally_related_form	01078050	1
02102605	_member_of_domain_region	01885367	0
13077295	_derivationally_related_form	00210738	1
12058822	_member_meronym	08726463	0
08615638	_derivationally_related_form	01934427	1
09268927	_similar_to	01884348	0
08860123	_member_of_domain_region	07696527	1
10641223	_derivationally_related_form	10659393	0
09078231	_member_of_domain_region	06938493	1
09332976	_member_meronym	09111168	0
09048880	_has_part	09147964	1
09877443	_similar_to	07752264	0
08365855	_derivationally_related_form	09945603	1
08505573	_synset_domain_topic_of	09192973	0
08505573	_hypernym	07941945	1
12979129	_has_part	07380144	0
01523823	_derivationally_related_form	01244593	1
02595702	_similar_to	01293167	0
00366858	_derivationally_related_form	13572436	1
01324799	_synset_domain_topic_of	08082236	0
01273016	_hypernym	01531742	1
06310945	_similar_to	13533470	0
14994328	_derivationally_related_form	00266586	1
13030438	_synset_domain_topic_of	06195698	0
09134386	_has_part	09192708	1
08935212	_member_of_domain_usage	01290435	0
02353844	_derivationally_related_form	03427296	1
01645093	_instance_hypernym	15183802	0
12992464	_member_meronym	12992868	1
09091398	_similar_to	03198951	0
01953810	_derivationally_related_form	04473432	1
10382825	_instance_hypernym	02343772	0
09071690	_has_part	09074431	1
09736633	_member_of_domain_usage	09142674	0
02635013	_member_meronym	02635154	1
02630468	_instance_hypernym	02632239	0
09117351	_member_of_domain_region	01294127	1
10490421	_also_see	04438742	0
02416104	_hypernym	02414578	1
12058822	_verb_group	03869222	0
15147850	_has_part	15146004	1
01646528	_also_see	04242704	0
02456962	_hypernym	02453611	1
02343187	_member_of_domain_region	08396537	0
13023292	_member_meronym	13024012	1
04419315	_member_of_domain_region	01439121	0
02470451	_member_meronym	02483915	1
12977296	_also_see	09313716	0
02601589	_member_meronym	02601767	1
10550090	_derivationally_related_form	01349493	0
09150448	_instance_hypernym	08672738	1
12058822	_member_meronym	02136285	0
06845599	_member_of_domain_usage	03748456	1
15183802	_derivationally_related_form	08396537	0
03599761	_derivationally_related_form	02461063	1
01084180	_hypernym	09234104	0
02623170	_member_meronym	02623868	1
01293167	_has_part	09693372	0
08894456	_has_part	09430771	1
09313716	_has_part	02513742	0
09416076	_hypernym	00019128	1
10595361	_synset_domain_topic_of	09478355	0
00963283	_derivationally_related_form	04879658	1
09142674	_similar_to	05638778	0
02131418	_member_meronym	02133902	1
02650928	_member_meronym	08095647	0
02509197	_hypernym	02507649	1
00585810	_member_of_domain_region	08726463	0
01448291	_hypernym	01446589	1
09678009	_member_of_domain_region	10382825	0
14894140	_derivationally_related_form	02192383	1
12975608	_member_of_domain_usage	08764561	0
06295235	_member_of_domain_usage	03443912	1
08726463	_instance_hypernym	02068206	0
09139380	_instance_hypernym	08665504	1
13533470	_member_of_domain_usage	06767777	0
02602405	_hypernym	02552171	1
09091398	_member_of_domain_usage	02346627	0
03457686	_hypernym	03461385	1
02062991	_member_meronym	07851054	0
02484975	_hypernym	02484473	1
10595361	_synset_domain_topic_of	02652979	0
02449921	_member_meronym	02450034	1
01293167	_also_see	00089657	0
13024967	_member_meronym	13025647	1
06369829	_has_part	01293167	0
06845599	_member_of_domain_usage	14753808	1
12048772	_member_of_domain_usage	08726463	0
02112891	_similar_to	02111684	1
02398463	_has_part	10460033	0
00624263	_derivationally_related_form	06372095	1
01290435	_verb_group	02369012	0
01642671	_member_meronym	01643092	1
04349701	_similar_to	01439121	0
13052931	_hypernym	13049953	1
02457408	_also_see	08787466	0
08953151	_has_part	08953324	1
02509197	_member_of_domain_region	10641223	0
02797021	_derivationally_related_form	06593803	1
02751782	_similar_to	09192973	0
00902932	_derivationally_related_form	06630627	1
13875185	_similar_to	09064594	0
09886807	_hypernym	09700492	1
01293167	_member_of_domain_usage	03093574	0
02548689	_hypernym	02552171	1
09064594	_member_of_domain_usage	03918297	0
13516176	_derivationally_related_form	00210738	1
01453330	_member_of_domain_usage	07775905	0
07803408	_hypernym	07803545	1
04242704	_verb_group	02630468	0
02400139	_member_meronym	02423787	1
13003254	_similar_to	04438742	0
06845599	_member_of_domain_usage	03818843	1
00855295	_also_see	04018399	0
08860123	_member_of_domain_region	08547300	1
13533470	_member_meronym	02595702	0
02064154	_member_meronym	02064608	1
03663433	_hypernym	08764561	0
08174398	_member_meronym	09044862	1
01884348	_instance_hypernym	02682424	0
02007417	_derivationally_related_form	00281132	1
13875185	_derivationally_related_form	08726463	0
02465414	_derivationally_related_form	01186428	1
01453330	_derivationally_related_form	08764561	0
08999482	_member_of_domain_region	09327077	1
05638778	_similar_to	08250635	0
08860123	_member_of_domain_region	13752172	1
03222959	_hypernym	01457082	0
02396427	_hypernym	02395003	1
02136285	_instance_hypernym	14299336	0
02395244	_member_meronym	02396427	1
02137549	_member_of_domain_region	02630281	0
01552956	_member_meronym	01553142	1
02630468	_member_of_domain_usage	02398854	0
04112752	_derivationally_related_form	00103317	1
10382825	_member_of_domain_region	03869222	0
08014860	_instance_hypernym	08392137	1
02589955	_verb_group	01290435	0
02011810	_derivationally_related_form	01778568	1
03663433	_instance_hypernym	10641223	0
06960298	_derivationally_related_form	02957823	1
14604959	_has_part	10641223	0
02658944	_member_meronym	02659176	1
12058822	_synset_domain_topic_of	01457082	0
00853633	_derivationally_related_form	00431005	1
02398854	_verb_group	14299336	0
13010219	_hypernym	11590783	1
01444164	_synset_domain_topic_of	01645093	0
12060546	_hypernym	12041446	1
00627437	_verb_group	00223854	0
02329093	_member_meronym	02329401	1
09478355	_also_see	02530421	0
02535909	_member_meronym	02536864	1
02068206	_hypernym	10215623	0
02354950	_member_meronym	02355711	1
14604959	_also_see	08250635	0
02400139	_member_meronym	02407959	1
00627437	_instance_hypernym	02653497	0
10082146	_derivationally_related_form	00991838	1
07842753	_verb_group	14752057	0
08723006	_member_of_domain_region	05915584	1
07450549	_synset_domain_topic_of	03093574	0
09721244	_derivationally_related_form	08961402	1
02553196	_also_see	09142674	0
06295235	_member_of_domain_usage	07140348	1
06767777	_derivationally_related_form	01293167	0
02660769	_member_meronym	02661765	1
10382825	_has_part	08800676	0
02366702	_member_meronym	02366825	1
09273447	_hypernym	12975608	0
01244593	_derivationally_related_form	00038365	1
02630468	_member_of_domain_usage	03962525	0
09095023	_has_part	09095751	1
02398854	_has_part	04993882	0
04051825	_derivationally_related_form	01130607	1
09332976	_has_part	09313716	0
02672859	_derivationally_related_form	13529616	1
00918471	_derivationally_related_form	01915365	0
14883206	_derivationally_related_form	00443670	1
01324799	_has_part	07380144	0
09095751	_has_part	03009477	1
02509694	_has_part	04107984	0
00902932	_hypernym	00897241	1
09144117	_instance_hypernym	09066948	0
12998349	_member_meronym	13016457	1
01915365	_member_of_domain_usage	02377480	0
03568653	_hypernym	03828465	1
06195698	_hypernym	09084196	0
08723006	_has_part	09327881	1
07851054	_instance_hypernym	13533470	0
09051235	_has_part	09075842	1
00052146	_verb_group	07851054	0
08860123	_member_of_domain_region	08555333	1
01128071	_has_part	05638778	0
00159899	_derivationally_related_form	00880227	1
04993882	_also_see	04242704	0
12963796	_member_meronym	12965209	1
01821634	_verb_group	02457408	0
01604251	_derivationally_related_form	00299680	1
02589955	_has_part	08095647	0
13011856	_member_meronym	13012030	1
10641223	_verb_group	09959258	0
02716866	_hypernym	02716205	1
01454856	_also_see	03198951	0
08766988	_has_part	08775784	1
06366581	_also_see	09058071	0
00491689	_derivationally_related_form	09440186	1
10490421	_member_of_domain_region	09142674	0
09095023	_has_part	09306031	1
03654086	_instance_hypernym	00223854	0
01471070	_member_meronym	01626134	1
02630468	_synset_domain_topic_of	12979129	0
00897241	_derivationally_related_form	06630017	1
13048666	_member_meronym	10641223	0
12979630	_hypernym	11592146	1
09472597	_verb_group	01349493	0
01542207	_verb_group	01541579	1
10490421	_hypernym	13623054	0
01503061	_has_part	01896031	1
03198951	_member_of_domain_region	01293167	0
02640857	_hypernym	02640242	1
09313716	_also_see	05638778	0
14487731	_derivationally_related_form	00493259	1
03021531	_has_part	08787466	0
02074915	_member_meronym	02083038	1
03198951	_hypernym	02630052	0
01645278	_hypernym	01626600	1
08851034	_verb_group	09058071	0
13065215	_member_meronym	13065514	1
01646528	_also_see	02682424	0
00230172	_derivationally_related_form	02156546	1
02124623	_synset_domain_topic_of	04349701	0
08801678	_has_part	08804962	1
02398463	_member_of_domain_usage	02952109	0
02534734	_has_part	07795751	1
09772746	_instance_hypernym	13753740	0
02117900	_hypernym	02117135	1
08095647	_similar_to	03586631	0
04412727	_hypernym	02720201	1
01442591	_instance_hypernym	06366581	0
00853633	_derivationally_related_form	10221312	1
14299336	_verb_group	01324799	0
01015996	_derivationally_related_form	10366779	1
09959258	_has_part	06310945	0
02648313	_hypernym	02647660	1
02398463	_similar_to	03654086	0
14996020	_derivationally_related_form	01245637	1
10641223	_verb_group	13048666	0
04879658	_derivationally_related_form	00963283	1
08851034	_has_part	01821634	0
09075842	_has_part	09076675	1
00585810	_member_of_domain_region	04018399	0
02641825	_member_meronym	02646377	1
15183802	_hypernym	14752057	0
15155220	_has_part	15165490	1
15169421	_also_see	01324799	0
14599641	_derivationally_related_form	00264875	1
02589955	_member_meronym	02513742	0
10338094	_derivationally_related_form	02390101	1
01294791	_member_of_domain_usage	13533470	0
02551824	_member_meronym	02552171	1
09472597	_instance_hypernym	09478355	0
06845599	_member_of_domain_usage	04407007	1
09268927	_member_of_domain_usage	10460033	0
01299735	_has_part	01295918	1
10641223	_synset_domain_topic_of	09142674	0
01647803	_member_meronym	01648001	1
10485440	_member_meronym	01084180	0
08860123	_member_of_domain_region	04314522	1
01547001	_has_part	07380144	0
08766988	_member_of_domain_region	09222742	1
09545324	_instance_hypernym	09144117	0
02136271	_derivationally_related_form	04069276	1
13030438	_member_of_domain_usage	05638778	0
04010348	_hypernym	02720725	1
02415577	_synset_domain_topic_of	02952109	0
08860123	_member_of_domain_region	08504851	1
07775905	_has_part	07775905	0
02379753	_derivationally_related_form	00212205	1
04242704	_synset_domain_topic_of	02398854	0
04733204	_derivationally_related_form	02262542	1
05385363	_synset_domain_topic_of	02682424	0
13060689	_member_meronym	13060912	1
12058822	_verb_group	01439121	0
04473432	_derivationally_related_form	01953810	1
00627437	_verb_group	10659393	0
07229747	_hypernym	07229530	1
07752264	_has_part	13048666	0
08780881	_has_part	08783286	1
03869222	_derivationally_related_form	10641223	0
14686913	_derivationally_related_form	00442267	1
01164874	_hypernym	07450549	0
13054211	_member_meronym	13055009	1
00459114	_hypernym	03198951	0
12039743	_member_meronym	12045352	1
02630281	_has_part	10659393	0
01915131	_derivationally_related_form	02898711	1
04419315	_member_of_domain_usage	02415577	0
08305942	_hypernym	08168978	1
10659393	_has_part	10485440	0
08860123	_member_of_domain_region	03702719	1
02630052	_member_of_domain_region	01349493	0
07673397	_hypernym	07672135	1
01324799	_derivationally_related_form	00585810	0
03519578	_hypernym	03519981	1
02456147	_member_meronym	09091398	0
01640383	_member_meronym	01640567	1
10485440	_member_meronym	08804487	0
02641608	_member_meronym	02651846	1
05385363	_member_of_domain_usage	02102605	0
01465994	_member_meronym	01467986	1
02068206	_also_see	12975608	0
03467517	_hypernym	04338517	1
01349493	_verb_group	01885367	0
13030852	_hypernym	13028611	1
09332976	_also_see	02136285	0
02412440	_derivationally_related_form	00058265	1
10485440	_verb_group	12058822	0
08174398	_member_meronym	08780881	1
09194357	_instance_hypernym	03918297	0
02854739	_hypernym	04508489	1
02456147	_similar_to	15183802	0
02389346	_verb_group	02389592	1
03093574	_synset_domain_topic_of	02457408	0
14807929	_hypernym	05407119	1
07649463	_verb_group	13533470	0
12985236	_hypernym	11592146	1
10215623	_has_part	10215623	0
14859622	_hypernym	14961512	1
08095647	_similar_to	02346627	0
02505809	_member_meronym	02505998	1
13623054	_synset_domain_topic_of	06883073	0
06871384	_derivationally_related_form	01050896	1
09397391	_verb_group	09268927	0
13016457	_member_meronym	13232515	1
02369012	_similar_to	06310945	0
02659808	_hypernym	02658079	1
10460033	_member_of_domain_usage	02369012	0
09070793	_has_part	02956500	1
02068206	_verb_group	15159819	0
00432839	_derivationally_related_form	14489113	1
02398463	_derivationally_related_form	10460033	0
09368224	_derivationally_related_form	08641113	1
09194357	_member_of_domain_region	04419315	0
00680485	_derivationally_related_form	06211078	1
01293167	_hypernym	09058071	0
02340186	_hypernym	02339922	1
00855295	_member_of_domain_usage	03918297	0
02175958	_derivationally_related_form	04989657	1
10550090	_instance_hypernym	04419315	0
00086835	_derivationally_related_form	00824054	1
08012765	_also_see	08122141	0
13000372	_member_meronym	13005568	1
09122968	_synset_domain_topic_of	04441282	0
09117351	_has_part	09192973	1
07380144	_member_meronym	02343772	0
09761068	_derivationally_related_form	02470685	1
00088713	_member_of_domain_usage	00855295	0
02399000	_hypernym	02394477	1
09053019	_synset_domain_topic_of	01290435	0
13753585	_hypernym	13745420	1
14299336	_member_of_domain_region	02653497	0
10621514	_derivationally_related_form	00849294	1
14604959	_member_of_domain_region	00356367	0
09095023	_member_of_domain_region	01283935	1
02477890	_member_meronym	01268112	0
08860123	_member_of_domain_region	09351547	1
00052146	_member_of_domain_region	02346627	0
00772813	_derivationally_related_form	00963283	1
15183802	_member_of_domain_region	07752264	0
09284015	_derivationally_related_form	01567888	1
03586631	_derivationally_related_form	08012765	0
02071294	_hypernym	02068974	1
08122141	_member_meronym	03198951	0
07622261	_derivationally_related_form	01265740	1
09678009	_member_of_domain_usage	00088713	0
08095647	_member_meronym	08096474	1
02630052	_member_of_domain_region	02102605	0
00410406	_derivationally_related_form	09738708	1
01645278	_member_of_domain_usage	00627437	0
02549533	_member_meronym	02549796	1
02062991	_also_see	09142674	0
06845599	_member_of_domain_usage	14753414	1
12977296	_derivationally_related_form	09053019	0
06695862	_derivationally_related_form	00880227	1
01349493	_verb_group	00088713	0
00883635	_hypernym	00883226	1
02136285	_instance_hypernym	09268927	0
02649218	_hypernym	02648625	1
09192973	_synset_domain_topic_of	02456147	0
01645634	_hypernym	01626134	1
00459114	_similar_to	04441282	0
14836468	_hypernym	14732946	1
02650928	_derivationally_related_form	02346627	0
09709001	_hypernym	09708405	1
06369829	_also_see	00052146	0
08554440	_hypernym	08553535	1
03586631	_member_of_domain_usage	13623054	0
13077033	_hypernym	12992868	1
01885367	_has_part	01084180	0
13043516	_hypernym	11590783	1
08764561	_has_part	08800676	0
13575433	_derivationally_related_form	00458754	1
01128071	_member_of_domain_usage	08095647	0
01398941	_derivationally_related_form	04049405	1
03198951	_member_of_domain_usage	02062991	0
02528534	_member_meronym	02541431	1
09234104	_hypernym	02630052	0
08801678	_member_of_domain_region	06964247	1
08122141	_synset_domain_topic_of	01454856	0
08368308	_derivationally_related_form	02875499	1
02589955	_verb_group	05638778	0
02425086	_hypernym	02419796	1
02068206	_member_meronym	01547001	0
01640383	_member_meronym	01640846	1
02660769	_similar_to	04993882	0
08563627	_has_part	09057311	1
12977296	_has_part	08250635	0
08801099	_member_meronym	09696124	1
10595361	_has_part	02530421	0
01190840	_derivationally_related_form	07891726	1
09678009	_instance_hypernym	12967281	0
09301249	_instance_hypernym	09241247	1
01290435	_instance_hypernym	02456147	0
01883212	_member_meronym	01883513	1
01885367	_has_part	02354621	0
09071690	_has_part	09378014	1
09142674	_synset_domain_topic_of	06310945	0
08342039	_hypernym	08339454	1
02477890	_similar_to	00918471	0
04353016	_hypernym	04352070	1
01480880	_verb_group	05638778	0
13070003	_hypernym	11590783	1
03869222	_member_of_domain_usage	03918297	0
02607630	_member_meronym	02609466	1
01324799	_member_meronym	02377480	0
13039870	_member_meronym	13040108	1
03663433	_instance_hypernym	09772746	0
02535349	_member_meronym	02535537	1
02137549	_hypernym	04993882	0
00105778	_derivationally_related_form	09930876	1
09332976	_also_see	03098140	0
09682803	_derivationally_related_form	08095647	1
02457408	_similar_to	04955160	0
01890860	_hypernym	01889520	1
02952109	_derivationally_related_form	02137549	0
02936020	_derivationally_related_form	06321702	1
00918471	_hypernym	13875185	0
15169248	_hypernym	15228378	1
08250635	_verb_group	09111168	0
03933529	_derivationally_related_form	02331175	1
06883073	_synset_domain_topic_of	08250635	0
10272171	_hypernym	09886010	1
10490421	_instance_hypernym	07752264	0
14599168	_hypernym	14739360	1
07775905	_instance_hypernym	12084746	0
13060451	_member_meronym	13062112	1
02513742	_hypernym	03586631	0
00252710	_derivationally_related_form	15147850	1
13030438	_hypernym	03198951	0
02521241	_member_meronym	02525543	1
00223854	_member_of_domain_region	02137549	0
10146927	_derivationally_related_form	00899597	1
09678009	_verb_group	02136285	0
05951969	_derivationally_related_form	10306279	1
06767777	_derivationally_related_form	00356367	0
03315644	_derivationally_related_form	01271189	1
09959258	_member_meronym	13048666	0
02435853	_hypernym	02399000	1
14604959	_member_of_domain_usage	06883073	0
06845599	_member_of_domain_usage	03295357	1
09144117	_synset_domain_topic_of	13048666	0
04764741	_derivationally_related_form	00485711	1
14604959	_verb_group	01453188	0
08723006	_member_of_domain_region	08321469	1
12975608	_member_of_domain_region	07775905	0
09052314	_instance_hypernym	09044862	1
02102605	_synset_domain_topic_of	09678009	0
12083339	_member_meronym	12083591	1
01268112	_has_part	03663433	0
09060768	_has_part	09358096	1
08800676	_also_see	08726463	0
09044862	_has_part	09067277	1
02102605	_member_meronym	09478355	0
06214744	_derivationally_related_form	00408852	1
09058071	_verb_group	13010219	0
13037124	_hypernym	11592146	1
13010219	_member_meronym	10641223	0
00713250	_derivationally_related_form	01266895	1
02553196	_similar_to	09089782	0
06845599	_member_of_domain_usage	14747168	1
02630281	_derivationally_related_form	08800676	0
08801678	_member_of_domain_region	08541609	1
08396537	_member_of_domain_usage	06195698	0
13298935	_hypernym	13298701	1
02062991	_has_part	08012765	0
02409202	_hypernym	02407959	1
03869222	_member_of_domain_region	04242704	0
08860123	_member_of_domain_region	06699225	1
09545324	_member_meronym	01164874	0
00105778	_derivationally_related_form	00427580	1
13030438	_member_of_domain_usage	13533470	0
07858595	_derivationally_related_form	02195470	1
13010219	_derivationally_related_form	01128071	0
13015229	_hypernym	11592146	1
03962525	_has_part	02343772	0
08174398	_member_meronym	09039411	1
02630468	_has_part	01453330	0
00419137	_derivationally_related_form	07443210	1
00627437	_member_of_domain_region	01884348	0
06845599	_member_of_domain_usage	03155334	1
03098140	_synset_domain_topic_of	03922412	0
05716744	_derivationally_related_form	02196690	1
03098140	_member_of_domain_region	08095647	0
02420789	_derivationally_related_form	00719705	1
12967281	_verb_group	04018399	0
01468238	_hypernym	01466257	1
10460033	_also_see	03654086	0
00575970	_derivationally_related_form	15055633	1
05638778	_instance_hypernym	14411243	0
09232165	_instance_hypernym	09475292	1
01884348	_member_of_domain_usage	01084180	0
08124971	_has_part	08125722	1
03198951	_also_see	12048772	0
12998349	_member_meronym	13074084	1
00356367	_member_meronym	01304121	0
08641113	_derivationally_related_form	10352299	1
03869222	_derivationally_related_form	01884348	0
06201908	_derivationally_related_form	00680346	1
09053019	_member_meronym	13533470	0
00880227	_derivationally_related_form	06695579	1
02952109	_also_see	09268927	0
08984788	_has_part	09453566	1
14411243	_member_meronym	02062991	0
06845599	_member_of_domain_usage	04006953	1
08935212	_derivationally_related_form	09053019	0
02066707	_hypernym	02062744	1
06369829	_hypernym	08095647	0
08929922	_member_of_domain_region	13753274	1
09111168	_synset_domain_topic_of	02457408	0
01126846	_hypernym	01127411	1
09084196	_has_part	09332976	0
06413889	_derivationally_related_form	07009946	1
01442591	_derivationally_related_form	09111168	0
12968408	_member_meronym	12970379	1
02346627	_instance_hypernym	01645093	0
09127461	_instance_hypernym	09399592	1
02653497	_verb_group	04441282	0
00883226	_derivationally_related_form	07230089	1
15169421	_member_of_domain_usage	01645278	0
00135285	_derivationally_related_form	06372095	1
07775905	_member_meronym	13875185	0
10490421	_hypernym	09841188	1
08936303	_member_of_domain_region	07450549	0
04051068	_hypernym	02673637	1
09058071	_member_of_domain_region	08936303	0
02340930	_hypernym	02339376	1
10490421	_member_of_domain_region	14752057	0
08929922	_member_of_domain_region	06964901	1
13753740	_hypernym	04993882	0
02593863	_member_meronym	02596888	1
02415577	_member_of_domain_region	01457082	0
06845599	_member_of_domain_usage	04476633	1
09678009	_also_see	02102605	0
09119277	_has_part	04604009	1
02632239	_similar_to	02630052	0
08674970	_derivationally_related_form	02468965	1
10641223	_member_of_domain_region	13042814	0
00105554	_derivationally_related_form	00431005	1
10550090	_has_part	02632239	0
09038990	_has_part	09719430	1
01547001	_member_of_domain_usage	09678009	0
09243405	_instance_hypernym	09215664	1
09332976	_derivationally_related_form	05638778	0
15159583	_derivationally_related_form	00734927	1
01084180	_instance_hypernym	10460033	0
02633677	_hypernym	02632989	1
02502357	_member_of_domain_usage	13533470	0
00485711	_derivationally_related_form	04764741	1
04438742	_hypernym	08549480	0
01896031	_has_part	01897991	1
01304121	_member_of_domain_usage	01444164	0
01696135	_derivationally_related_form	04694809	1
02369012	_has_part	01453330	0
03670622	_hypernym	02716866	1
09332976	_synset_domain_topic_of	08785958	0
09087599	_has_part	09368479	1
06310945	_synset_domain_topic_of	09111168	0
08149781	_hypernym	08081668	1
13003254	_derivationally_related_form	02751782	0
09260466	_hypernym	09416076	1
01290435	_member_of_domain_region	04438742	0
13024763	_member_meronym	13024967	1
02136285	_instance_hypernym	02630468	0
02534352	_member_meronym	02535349	1
03962525	_hypernym	02124623	0
01891438	_member_meronym	01891633	1
08396537	_instance_hypernym	07752264	0
03612814	_hypernym	03990474	1
13003254	_member_of_domain_region	09545324	0
09044862	_has_part	09111366	1
03869222	_hypernym	15169421	0
03662016	_hypernym	03681148	1
14604959	_verb_group	10490421	0
02396796	_hypernym	02395003	1
09545324	_derivationally_related_form	14604959	0
09082540	_has_part	09084483	1
04441282	_has_part	09397391	0
10318892	_derivationally_related_form	01743531	1
08095647	_instance_hypernym	03021531	0
12978969	_hypernym	11590783	1
04418644	_member_of_domain_usage	00585810	0
06845599	_member_of_domain_usage	04443588	1
00918471	_instance_hypernym	09678009	0
02989475	_hypernym	02996840	1
00088713	_synset_domain_topic_of	02652979	0
06344461	_hypernym	06343971	1
08505573	_verb_group	08851034	0
01874928	_hypernym	01874434	1
02653497	_verb_group	09273447	0
15228378	_hypernym	15129927	1
04993882	_similar_to	12979129	0
10352299	_derivationally_related_form	08641113	1
01645093	_verb_group	08549480	0
02068735	_member_meronym	02069569	1
02343187	_verb_group	06767777	0
02324045	_has_part	02158739	1
01304121	_verb_group	08851034	0
02356108	_member_meronym	02355477	1
02343772	_member_of_domain_usage	03869222	0
03362393	_hypernym	02715941	1
01480880	_synset_domain_topic_of	13533470	0
05681117	_has_part	05768553	1
08804487	_derivationally_related_form	08726463	0
07427337	_derivationally_related_form	00223500	1
15183802	_also_see	08505573	0
10582154	_derivationally_related_form	02540670	1
13753740	_verb_group	02682424	0
09078231	_member_of_domain_region	02581957	1
08012765	_verb_group	13010219	0
02507337	_member_meronym	02509694	1
09772746	_verb_group	01439121	0
10268299	_derivationally_related_form	02614387	1
06369829	_derivationally_related_form	03093574	0
07443210	_derivationally_related_form	00441212	1
13533470	_verb_group	09110229	0
08780881	_member_of_domain_region	09542697	1
13040303	_has_part	14299336	0
02015168	_derivationally_related_form	00057306	1
02682424	_synset_domain_topic_of	12975608	0
09039411	_member_of_domain_region	06340047	1
13003254	_also_see	01543731	0
02430191	_derivationally_related_form	01081456	1
01645278	_synset_domain_topic_of	02398463	0
06845599	_member_of_domain_usage	03588668	1
02398463	_member_meronym	00855295	0
06295235	_member_of_domain_usage	09212572	1
01324799	_hypernym	04018399	0
02335349	_member_meronym	02338029	1
02457408	_instance_hypernym	13030438	0
13007770	_hypernym	11592146	1
08787466	_derivationally_related_form	02589955	0
07679356	_derivationally_related_form	01337653	1
01444164	_member_meronym	02502357	0
02331309	_hypernym	02331046	1
07775905	_hypernym	03663433	0
00680346	_hypernym	00680145	1
02343187	_verb_group	09736633	0
08986066	_instance_hypernym	08691669	1
09545324	_instance_hypernym	09144117	0
11517494	_derivationally_related_form	00073584	1
09053019	_derivationally_related_form	01454856	0
09067277	_has_part	09373716	1
02650928	_member_of_domain_region	02457408	0
00842692	_derivationally_related_form	01186428	1
07851054	_hypernym	03586631	0
00492677	_derivationally_related_form	08615374	1
13533470	_synset_domain_topic_of	08012765	0
13005329	_hypernym	12998815	1
01324799	_member_meronym	02952109	0
07653394	_hypernym	07649854	1
00223854	_verb_group	09268927	0
10382825	_derivationally_related_form	03854065	1
08851034	_similar_to	02513742	0
02652668	_hypernym	02552171	1
01453330	_also_see	12084746	0
00088725	_derivationally_related_form	01215137	1
01268112	_hypernym	02477890	0
02453890	_member_meronym	02456776	1
10382825	_member_of_domain_region	00918471	0
09400667	_instance_hypernym	09440186	1
13010219	_has_part	02513742	0
01158572	_derivationally_related_form	13451804	1
02366825	_member_meronym	09066948	0
07779747	_hypernym	07775905	1
03021531	_member_of_domain_usage	08935212	0
01653026	_hypernym	01639765	1
03222959	_has_part	08764561	0
02358091	_hypernym	02355227	1
12084746	_similar_to	04018399	0
04947628	_hypernym	04947186	1
08936303	_member_of_domain_usage	09545324	0
09075842	_has_part	09378014	1
03922412	_has_part	09144117	0
08860123	_member_of_domain_region	07450343	1
01645093	_derivationally_related_form	09066948	0
00040188	_derivationally_related_form	00256961	1
02630281	_member_of_domain_region	08804487	0
02411705	_has_part	02439568	1
02062991	_also_see	09110229	0
09044862	_has_part	09059274	1
01349493	_derivationally_related_form	00223854	0
00991838	_derivationally_related_form	14864360	1
01442591	_also_see	02509197	0
02510455	_hypernym	02507649	1
12084746	_member_meronym	01268112	0
02546075	_derivationally_related_form	10183757	1
12048772	_similar_to	08764561	0
02553196	_member_meronym	02621721	1
02343187	_similar_to	06767777	0
00191517	_derivationally_related_form	13496771	1
01294791	_hypernym	08505573	0
02400139	_member_meronym	02409702	1
10595361	_also_see	02369012	0
14841267	_derivationally_related_form	02112891	1
03869222	_synset_domain_topic_of	02136285	0
01167981	_derivationally_related_form	08253815	1
04242704	_synset_domain_topic_of	00223854	0
00492677	_derivationally_related_form	04764741	1
08785958	_verb_group	09545324	0
02341475	_hypernym	02339376	1
03654086	_derivationally_related_form	02377480	0
10162354	_derivationally_related_form	03497657	1
08935212	_synset_domain_topic_of	09084196	0
02130308	_hypernym	02127808	1
02509694	_has_part	01480880	0
01141938	_derivationally_related_form	02062744	1
03222959	_synset_domain_topic_of	02652979	0
07590611	_hypernym	07588947	1
13010219	_member_meronym	05638778	0
02380009	_derivationally_related_form	10525617	1
06369829	_also_see	01453188	0
01888520	_member_meronym	01893535	1
02509694	_has_part	02457408	0
01560369	_derivationally_related_form	00360242	1
02398854	_hypernym	00585810	0
01648494	_member_meronym	01648620	1
01543731	_also_see	06366581	0
09194357	_has_part	09357847	1
02343772	_has_part	02530421	0
12967776	_hypernym	11590783	1
04955160	_hypernym	03198951	0
08932568	_has_part	08933621	1
03654086	_has_part	04993882	0
01445027	_derivationally_related_form	14757547	1
01453188	_also_see	08396537	0
02457756	_member_meronym	02457945	1
00088713	_also_see	01915365	0
13660178	_derivationally_related_form	00491689	1
09194357	_member_meronym	15169421	0
01130607	_derivationally_related_form	04051825	1
08250635	_instance_hypernym	14752057	0
06845599	_member_of_domain_usage	15071684	1
04418644	_member_of_domain_region	09194357	0
02602212	_derivationally_related_form	07515974	1
01480880	_derivationally_related_form	10490421	0
03497657	_has_part	02902079	1
09091398	_derivationally_related_form	02346627	0
09103943	_has_part	09459557	1
03021531	_member_of_domain_usage	07752264	0
00161739	_derivationally_related_form	01696648	1
13040303	_also_see	04441282	0
08133189	_hypernym	08337324	1
09194357	_similar_to	02415577	0
00799537	_derivationally_related_form	02414473	1
09142674	_hypernym	01480880	0
13205482	_member_meronym	13210006	1
01884348	_member_meronym	12975608	0
08860123	_member_of_domain_region	04441528	1
02377480	_has_part	08726463	0
09109444	_has_part	09109882	1
01645278	_similar_to	12967281	0
01305361	_hypernym	02085742	1
01884348	_instance_hypernym	13753740	0
02336011	_hypernym	02329401	1
09472597	_similar_to	02102605	0
03970363	_hypernym	02896442	1
01543731	_has_part	14411243	0
03061081	_derivationally_related_form	05996646	1
12048772	_also_see	01915365	0
13486270	_derivationally_related_form	00442267	1
08082236	_derivationally_related_form	02477890	0
01382818	_derivationally_related_form	01639765	1
04221994	_member_of_domain_usage	09122968	0
02673480	_hypernym	02832168	1
13875185	_member_of_domain_usage	10485440	0
08860123	_member_of_domain_region	07635155	1
01442591	_hypernym	14604959	0
13006377	_hypernym	11592146	1
01454856	_member_of_domain_usage	01294791	0
01075117	_hypernym	00954086	1
08396537	_has_part	03021531	0
02784732	_derivationally_related_form	01273263	1
09478355	_has_part	15159819	0
06295235	_member_of_domain_usage	03885028	1
00088713	_member_meronym	02343772	0
00089154	_derivationally_related_form	14283632	1
08122141	_has_part	13003254	0
02907985	_instance_hypernym	04511002	1
00585810	_has_part	01645278	0
15058163	_hypernym	15057744	1
13533470	_derivationally_related_form	02369012	0
08910668	_has_part	09237404	1
04441282	_member_meronym	14607521	0
14276936	_hypernym	14070360	1
08800676	_member_of_domain_usage	12084746	0
08214470	_hypernym	08190754	1
01457082	_synset_domain_topic_of	10595361	0
13038944	_member_meronym	13046285	1
02354621	_derivationally_related_form	07775905	0
00366858	_derivationally_related_form	15055633	1
02343187	_derivationally_related_form	02595702	0
08860123	_member_of_domain_region	13359941	1
09058071	_verb_group	08122141	0
02652979	_member_meronym	02653359	1
09122968	_member_meronym	07380144	0
13029946	_member_meronym	13030157	1
02457408	_hypernym	08505573	0
09114696	_has_part	09418484	1
01543731	_also_see	14411243	0
03914919	_derivationally_related_form	01543731	1
04419315	_hypernym	02102605	0
09109444	_has_part	09441725	1
01884348	_similar_to	14299336	0
05410646	_hypernym	05407119	1
09066948	_verb_group	09332976	0
13063269	_hypernym	12992868	1
02369012	_hypernym	01457082	0
03928814	_hypernym	03614007	1
02068206	_verb_group	02136285	0
02483915	_member_meronym	02484473	1
03198951	_member_of_domain_usage	07380144	0
02068206	_hypernym	02066707	1
08082236	_instance_hypernym	12048772	0
02654425	_hypernym	02652668	1
00223854	_verb_group	13040303	0
06845599	_member_of_domain_usage	03554131	1
02509694	_similar_to	04107984	0
00483656	_derivationally_related_form	06863751	1
03918297	_hypernym	12979129	0
13063046	_hypernym	11594676	1
02630281	_member_of_domain_usage	04221994	0
00604617	_derivationally_related_form	04718563	1
06366581	_synset_domain_topic_of	08095647	0
06295235	_member_of_domain_usage	04323819	1
04018399	_derivationally_related_form	04018399	0
01144550	_derivationally_related_form	02443484	1
09091398	_also_see	00356367	0
09049599	_has_part	09103943	1
04418644	_verb_group	02477890	0
13003522	_hypernym	12998815	1
02398854	_member_of_domain_usage	02952109	0
14974264	_derivationally_related_form	01268457	1
03021531	_verb_group	03093574	0
08860123	_member_of_domain_region	07889814	1
04955160	_instance_hypernym	04107984	0
02355477	_hypernym	02355227	1
09234104	_synset_domain_topic_of	04242704	0
09060768	_has_part	09326467	1
02652979	_member_of_domain_usage	02630052	0
06510977	_derivationally_related_form	02896789	1
15159819	_similar_to	06310945	0
04248851	_derivationally_related_form	01480770	1
15169421	_has_part	02137549	0
01758308	_derivationally_related_form	01173813	1
09234104	_hypernym	02377480	0
14705718	_derivationally_related_form	01354006	1
06310945	_derivationally_related_form	09313716	0
09044862	_member_of_domain_region	08303692	1
01324799	_synset_domain_topic_of	12048772	0
12992464	_member_meronym	11592146	1
06310945	_verb_group	02343772	0
03747746	_hypernym	03771443	1
02456147	_derivationally_related_form	01294791	0
13031956	_hypernym	11592146	1
02509197	_instance_hypernym	09084196	0
01320513	_derivationally_related_form	10587227	1
01164874	_verb_group	09959258	0
02485451	_derivationally_related_form	01164874	1
08122141	_verb_group	13048666	0
01193099	_derivationally_related_form	00840630	1
10659393	_member_of_domain_region	01547001	0
13210006	_hypernym	13167078	1
04221994	_member_of_domain_region	09064594	0
03550533	_hypernym	02718469	1
06767777	_member_of_domain_region	10490421	0
02590237	_member_meronym	02592244	1
13030438	_synset_domain_topic_of	09144117	0
02373093	_member_meronym	02373601	1
02369012	_member_of_domain_usage	03962525	0
12982103	_hypernym	11590783	1
15169421	_instance_hypernym	02124623	0
04353410	_hypernym	03828465	1
13010219	_member_of_domain_usage	01444164	0
02072355	_member_meronym	02072493	1
08851034	_synset_domain_topic_of	08787466	0
09711132	_hypernym	09710164	1
02530421	_member_of_domain_region	13753740	0
01290435	_instance_hypernym	01075117	1
13048666	_also_see	02513742	0
09250165	_instance_hypernym	09453008	1
04947628	_verb_group	02751782	0
02156063	_derivationally_related_form	13773361	1
03654086	_hypernym	09478355	0
09114696	_has_part	09228619	1
07775905	_hypernym	00223854	0
01284444	_instance_hypernym	00223983	1
05638778	_also_see	09959258	0
09044862	_has_part	09089139	1
13030438	_has_part	09053019	0
02380980	_hypernym	01766952	1
09192973	_synset_domain_topic_of	07450549	0
02553196	_member_meronym	02618244	1
08250635	_also_see	01543731	0
12996225	_member_meronym	13065902	1
09877443	_member_meronym	01128071	0
06367373	_derivationally_related_form	01635176	1
01821634	_similar_to	09693372	0
13068434	_hypernym	13066129	1
12977296	_member_meronym	02509197	0
02325211	_member_meronym	02325366	1
02369012	_has_part	10550090	0
02554235	_derivationally_related_form	10663315	1
01645093	_hypernym	04438742	0
02574651	_member_meronym	02574910	1
12084746	_derivationally_related_form	14607521	0
06295235	_member_of_domain_usage	09269972	1
02509197	_member_meronym	09091398	0
01546660	_member_meronym	01547459	1
01454856	_has_part	14604959	0
00288486	_derivationally_related_form	01928730	1
13030438	_member_of_domain_region	08012765	0
09048880	_has_part	09092497	1
08787466	_similar_to	09091398	0
06295235	_member_of_domain_usage	01042764	1
08764561	_also_see	02136285	0
00719705	_derivationally_related_form	02461063	1
15183802	_instance_hypernym	03098140	0
02590910	_derivationally_related_form	10788852	1
01444164	_also_see	02509694	0
00964105	_instance_hypernym	00962129	1
08726463	_instance_hypernym	00223854	0
09141526	_has_part	09388121	1
08936303	_member_of_domain_region	09545324	0
10792335	_derivationally_related_form	01778017	1
01349493	_similar_to	03918297	0
02597367	_hypernym	02594250	1
14299336	_member_meronym	10485440	0
02346315	_member_meronym	02346823	1
01268112	_similar_to	00088713	0
00201058	_derivationally_related_form	01972131	1
12048772	_similar_to	01884348	0
09152944	_has_part	09153710	1
14299336	_member_of_domain_region	03918297	0
02564403	_hypernym	02562315	1
03093574	_also_see	09111168	0
13030157	_member_meronym	13030438	1
02369012	_member_of_domain_usage	02398854	0
15165289	_has_part	15169136	1
03654086	_synset_domain_topic_of	02630468	0
02133704	_hypernym	02131653	1
01646528	_similar_to	09772746	0
09044862	_has_part	09075842	1
02062991	_instance_hypernym	09332976	0
00962722	_derivationally_related_form	02583780	1
02354621	_derivationally_related_form	10595361	0
02072159	_derivationally_related_form	00914343	1
08851034	_verb_group	02513742	0
08932568	_has_part	08933940	1
09111168	_has_part	07851054	0
10075529	_derivationally_related_form	06371413	1
09545324	_member_of_domain_region	02136285	0
01883513	_hypernym	01874434	1
01480880	_has_part	03021531	0
05010801	_derivationally_related_form	02675458	1
04418644	_verb_group	04242704	0
01649948	_member_meronym	01650167	1
12975608	_synset_domain_topic_of	02415577	0
09138935	_has_part	09320985	1
03098140	_member_of_domain_usage	01444164	0
09237076	_has_part	09405169	1
02343187	_similar_to	01164874	0
02688623	_derivationally_related_form	07802417	1
14604959	_instance_hypernym	07752264	0
04236001	_derivationally_related_form	02701445	1
02652979	_member_of_domain_region	02682424	0
03200357	_hypernym	03895866	1
02124623	_similar_to	10550090	0
03718056	_hypernym	03214670	1
00356367	_verb_group	02369012	0
01644104	_hypernym	01626134	1
08936303	_member_of_domain_usage	14604959	0
09044862	_has_part	09078231	1
03962525	_instance_hypernym	00585810	0
00751389	_derivationally_related_form	00848466	1
08851034	_has_part	07842753	0
09219078	_instance_hypernym	09403734	1
09058071	_instance_hypernym	13030438	0
02546744	_member_meronym	02546873	1
09313716	_verb_group	01290435	0
05043973	_derivationally_related_form	02112029	1
02952109	_similar_to	08800676	0
01649948	_member_meronym	01652163	1
09332976	_also_see	08549480	0
09078231	_derivationally_related_form	02738760	1
00918471	_similar_to	04221994	0
02989893	_hypernym	02996840	1
01457082	_also_see	02632239	0
08860123	_member_of_domain_usage	10548227	1
03098140	_also_see	01442591	0
