# Supplementary material
Source: ML conference proceedings conference paper supplement (https://proceedings.neurips.cc/paper_files/paper/2021/hash/0fd600c953cde8121262e322ef09f70e-Abstract.html)
Supplement: Supplementary file 1 [file 0fd600c953cde8121262e322ef09f70e-Supplemental.zip › Supplementary_Material_Paper_8745/data/GraIL-BM_WN18RR_v3/test/test-random-sample/test2.txt]

02521241	_member_meronym	02521916	1
04441282	_verb_group	00855295	0
02341974	_hypernym	02339376	1
03151500	_similar_to	08570758	0
03109350	_instance_hypernym	04511002	1
08082236	_derivationally_related_form	03962525	0
00053609	_derivationally_related_form	00426958	1
09351647	_hypernym	05949937	0
01631759	_hypernym	01626134	1
07851054	_also_see	07851054	0
08766988	_member_of_domain_region	09877443	1
07678193	_derivationally_related_form	06776783	0
01215137	_derivationally_related_form	06547832	1
02513742	_member_of_domain_usage	08787466	0
02923510	_derivationally_related_form	06234825	1
01444164	_also_see	05638778	0
08897065	_has_part	09168020	1
04955160	_synset_domain_topic_of	08936303	0
00014742	_hypernym	00014405	1
04419315	_has_part	02477890	0
00211108	_derivationally_related_form	13460568	1
00485711	_member_meronym	04229107	0
02354781	_hypernym	02353861	1
01294791	_member_of_domain_usage	02509197	0
14894140	_hypernym	14727670	1
06767777	_verb_group	13010219	0
02441723	_member_meronym	02442845	1
05385363	_has_part	00627437	0
00963283	_derivationally_related_form	06790042	1
04441282	_instance_hypernym	02136285	0
02832818	_derivationally_related_form	02720201	1
03909835	_verb_group	01876180	0
01153305	_derivationally_related_form	00369194	1
03663433	_hypernym	04242704	0
02601589	_member_meronym	02601921	1
14894140	_member_of_domain_region	01474283	0
12043248	_member_meronym	12043444	1
02934168	_member_meronym	14672224	0
01269360	_instance_hypernym	00223983	1
02629410	_member_of_domain_usage	02601921	0
00702226	_derivationally_related_form	04438304	1
03222959	_instance_hypernym	02630468	0
02399000	_derivationally_related_form	01174555	1
09111168	_also_see	00356367	0
09044862	_has_part	09110422	1
03663433	_synset_domain_topic_of	01884348	0
02453890	_member_meronym	02457586	1
05949937	_synset_domain_topic_of	00233614	0
01292727	_hypernym	01292534	1
02062991	_similar_to	02457408	0
02528534	_member_meronym	02540255	1
03663433	_synset_domain_topic_of	04018399	0
02583139	_derivationally_related_form	00962129	1
09332976	_similar_to	02343187	0
02927512	_derivationally_related_form	09044862	1
04418644	_has_part	15159819	0
00492677	_also_see	02111684	1
02650928	_similar_to	00089657	0
02593863	_member_meronym	02595902	1
09332976	_synset_domain_topic_of	14411243	0
00210738	_derivationally_related_form	13077033	1
09157163	_synset_domain_topic_of	03352961	0
09044862	_member_of_domain_region	08122009	1
09356080	_derivationally_related_form	03519981	0
03299648	_hypernym	03214670	1
15183802	_instance_hypernym	04955160	0
04300080	_derivationally_related_form	01594362	1
02630052	_derivationally_related_form	02398463	0
09401474	_instance_hypernym	09403734	1
03198951	_similar_to	00233614	0
09052652	_member_meronym	10802283	1
09201301	_has_part	00374668	0
02398854	_derivationally_related_form	10271677	1
02136285	_similar_to	02456147	0
06778102	_derivationally_related_form	00853633	1
03586631	_instance_hypernym	09089782	0
03829085	_hypernym	02718811	1
02398463	_has_part	01439121	0
01478300	_member_meronym	01478511	1
03198951	_hypernym	03586631	0
12982723	_hypernym	11592146	1
08082236	_verb_group	10460033	0
01454856	_hypernym	02552171	1
02601921	_has_part	01015996	0
02870092	_derivationally_related_form	06413889	1
02485451	_instance_hypernym	08790953	0
04186848	_derivationally_related_form	01560369	1
02485451	_member_of_domain_usage	00842692	0
06845599	_member_of_domain_usage	02705651	1
03352961	_member_of_domain_region	02595569	0
01262936	_derivationally_related_form	07738353	1
12058822	_also_see	01645278	0
08564307	_has_part	09109444	1
12977565	_verb_group	00252710	0
01042764	_hypernym	01041968	1
09053019	_verb_group	04107984	0
08860123	_member_of_domain_region	04240576	1
10460033	_member_meronym	08764561	0
09169801	_instance_hypernym	08505573	1
02652132	_member_of_domain_region	01282466	0
07450343	_derivationally_related_form	00855295	1
09089782	_verb_group	03586631	0
12972818	_hypernym	11594676	1
02595702	_has_part	13030438	0
14607521	_derivationally_related_form	00264875	1
06767777	_has_part	04955160	0
15155220	_has_part	15227846	1
02343772	_has_part	07775905	0
09131654	_has_part	09244972	1
13030438	_synset_domain_topic_of	06369829	0
05588174	_derivationally_related_form	02884456	1
09111168	_member_of_domain_usage	13623054	0
09714120	_derivationally_related_form	08953324	1
02630468	_member_meronym	03869222	0
09141526	_has_part	09145083	1
09234104	_hypernym	10485440	0
01639369	_member_meronym	01642671	1
05525100	_also_see	03151500	0
00626800	_also_see	00625393	1
06366581	_synset_domain_topic_of	09091398	0
06845599	_member_of_domain_usage	04006727	1
10460033	_member_meronym	10485440	0
08381820	_hypernym	08381636	1
14752057	_derivationally_related_form	01294791	0
07556637	_derivationally_related_form	01167188	1
09066948	_member_of_domain_usage	13623054	0
00854150	_derivationally_related_form	10221312	1
13950812	_instance_hypernym	09219078	0
08136260	_hypernym	08348815	1
03519981	_member_of_domain_usage	04473432	0
10181990	_hypernym	10024119	1
08570758	_hypernym	01928390	0
08860123	_member_of_domain_region	02463990	1
08800676	_has_part	02660769	0
06845599	_member_of_domain_usage	03771066	1
03186005	_derivationally_related_form	03534890	0
06621447	_derivationally_related_form	02797021	1
12979129	_member_meronym	02124623	0
12992464	_member_meronym	12975207	1
15183802	_instance_hypernym	13030438	0
09682291	_derivationally_related_form	02923510	1
01015996	_member_meronym	06880664	0
02424085	_hypernym	02419796	1
01442591	_member_of_domain_usage	02751782	0
09119277	_has_part	09370383	1
06310945	_hypernym	09693372	0
08860123	_member_of_domain_region	07722485	1
00374668	_has_part	09453288	0
14487731	_derivationally_related_form	00492706	1
02601921	_verb_group	01474283	0
04762355	_derivationally_related_form	00625393	1
09110229	_member_of_domain_region	02343187	0
13016457	_member_meronym	13001743	1
09877443	_member_meronym	01444164	0
01303582	_instance_hypernym	00962722	1
04178329	_similar_to	05525100	0
02536165	_has_part	07796165	1
13076181	_also_see	01876180	0
02601344	_has_part	07784367	1
04438742	_has_part	06369829	0
08416652	_hypernym	08251877	1
10659393	_synset_domain_topic_of	04418644	0
00963283	_derivationally_related_form	00963241	1
02513742	_derivationally_related_form	09545324	0
02176747	_hypernym	02176261	1
01304121	_synset_domain_topic_of	01290435	0
06214580	_derivationally_related_form	10619176	1
01084180	_also_see	07775905	0
07689217	_hypernym	07689003	1
12975608	_derivationally_related_form	04419315	0
12970379	_member_meronym	12970560	1
01444164	_member_of_domain_region	03198951	0
10244913	_hypernym	09770949	1
01449586	_also_see	10209731	0
08780881	_member_of_domain_region	07036862	1
09157163	_derivationally_related_form	01086945	0
02066450	_member_meronym	02068735	1
13076181	_member_meronym	03966976	0
09117351	_has_part	09123809	1
03519981	_hypernym	03352961	0
04352070	_hypernym	02716205	1
04586932	_synset_domain_topic_of	04229107	0
13007417	_hypernym	12998815	1
03186005	_also_see	03519981	0
03854065	_hypernym	04586932	1
07752264	_member_of_domain_region	02509197	0
13002433	_member_meronym	13003522	1
06195698	_derivationally_related_form	10641223	0
02655523	_hypernym	02652668	1
07842753	_member_of_domain_usage	01645093	0
01245813	_derivationally_related_form	01078050	1
02068206	_also_see	07775905	0
13077295	_derivationally_related_form	00210738	1
12048772	_also_see	02630052	0
08615638	_derivationally_related_form	01934427	1
01885367	_also_see	09122968	0
08860123	_member_of_domain_region	07696527	1
03909835	_member_meronym	09731906	0
09078231	_member_of_domain_region	06938493	1
01547001	_derivationally_related_form	02398463	0
09048880	_has_part	09147964	1
15183802	_derivationally_related_form	14411243	0
08365855	_derivationally_related_form	09945603	1
00223854	_instance_hypernym	01268112	0
08505573	_hypernym	07941945	1
09736633	_instance_hypernym	02553196	0
01523823	_derivationally_related_form	01244593	1
01474283	_also_see	00252710	0
00366858	_derivationally_related_form	13572436	1
08122141	_has_part	08549480	0
01273016	_hypernym	01531742	1
03352961	_member_of_domain_region	10209731	0
14994328	_derivationally_related_form	00266586	1
08935212	_has_part	13048666	0
09134386	_has_part	09192708	1
02398463	_member_meronym	13040303	0
02353844	_derivationally_related_form	03427296	1
09053019	_also_see	09693372	0
12992464	_member_meronym	12992868	1
02660769	_derivationally_related_form	00627437	0
01953810	_derivationally_related_form	04473432	1
08404895	_also_see	07623933	0
09071690	_has_part	09074431	1
02477890	_also_see	02653497	0
02635013	_member_meronym	02635154	1
09678009	_member_of_domain_usage	01268112	0
09117351	_member_of_domain_region	01294127	1
04473432	_also_see	03534890	0
02416104	_hypernym	02414578	1
07623933	_similar_to	04535524	0
15147850	_has_part	15146004	1
04418644	_hypernym	10382825	0
02456962	_hypernym	02453611	1
09397391	_member_of_domain_usage	06310945	0
13023292	_member_meronym	13024012	1
02589955	_also_see	09545324	0
02470451	_member_meronym	02483915	1
00089657	_has_part	08250635	0
02601589	_member_meronym	02601767	1
09219078	_verb_group	06263609	0
09150448	_instance_hypernym	08672738	1
01294791	_derivationally_related_form	08936303	0
06845599	_member_of_domain_usage	03748456	1
02513742	_similar_to	14752057	0
03599761	_derivationally_related_form	02461063	1
02629410	_derivationally_related_form	12977565	0
02623170	_member_meronym	02623868	1
09807754	_derivationally_related_form	03757925	0
08894456	_has_part	09430771	1
03021531	_instance_hypernym	13030438	0
09416076	_hypernym	00019128	1
07623933	_derivationally_related_form	08782976	0
00963283	_derivationally_related_form	04879658	1
08505573	_member_meronym	02595702	0
02131418	_member_meronym	02133902	1
02136285	_member_of_domain_usage	01844859	0
02509197	_hypernym	02507649	1
13040303	_member_of_domain_usage	04018399	0
01448291	_hypernym	01446589	1
02650928	_hypernym	09693372	0
14894140	_derivationally_related_form	02192383	1
02415577	_also_see	15159819	0
06295235	_member_of_domain_usage	03443912	1
13064678	_similar_to	04535524	0
09139380	_instance_hypernym	08665504	1
13076181	_member_of_domain_region	03976268	0
02602405	_hypernym	02552171	1
09693372	_member_meronym	01293167	0
03457686	_hypernym	03461385	1
09155986	_instance_hypernym	09155986	0
02484975	_hypernym	02484473	1
14672224	_derivationally_related_form	01015996	0
02449921	_member_meronym	02450034	1
06310945	_synset_domain_topic_of	14607521	0
13024967	_member_meronym	13025647	1
01290435	_verb_group	08095647	0
06845599	_member_of_domain_usage	14753808	1
14894140	_member_of_domain_region	03534890	0
02112891	_similar_to	02111684	1
05949937	_derivationally_related_form	12963140	0
00624263	_derivationally_related_form	06372095	1
08082236	_member_of_domain_region	02124623	0
01642671	_member_meronym	01643092	1
09114696	_has_part	13076181	0
13052931	_hypernym	13049953	1
09736633	_similar_to	08250635	0
08953151	_has_part	08953324	1
01086945	_derivationally_related_form	04178329	0
02797021	_derivationally_related_form	06593803	1
02457408	_also_see	01821634	0
00902932	_derivationally_related_form	06630627	1
03976268	_derivationally_related_form	09219078	0
09886807	_hypernym	09700492	1
01885367	_similar_to	05385363	0
02548689	_hypernym	02552171	1
02398854	_also_see	01884348	0
13516176	_derivationally_related_form	00210738	1
08012765	_member_of_domain_region	09144117	0
07803408	_hypernym	07803545	1
00356367	_verb_group	01444164	0
02400139	_member_meronym	02423787	1
09545324	_instance_hypernym	08851034	0
06845599	_member_of_domain_usage	03818843	1
00991838	_member_of_domain_region	03352961	0
08860123	_member_of_domain_region	08547300	1
02369012	_member_of_domain_usage	08505573	0
02064154	_member_meronym	02064608	1
02630468	_member_of_domain_region	03869222	0
08174398	_member_meronym	09044862	1
09731906	_member_of_domain_region	03966976	0
02007417	_derivationally_related_form	00281132	1
09545324	_derivationally_related_form	07450549	0
02465414	_derivationally_related_form	01186428	1
09692624	_hypernym	09453288	0
08999482	_member_of_domain_region	09327077	1
14604959	_member_of_domain_region	01293167	0
08860123	_member_of_domain_region	13752172	1
01084180	_synset_domain_topic_of	02068206	0
02396427	_hypernym	02395003	1
09201301	_synset_domain_topic_of	14894140	0
02395244	_member_meronym	02396427	1
07752264	_synset_domain_topic_of	01480880	0
01552956	_member_meronym	01553142	1
01645278	_verb_group	09268927	0
04112752	_derivationally_related_form	00103317	1
15171008	_member_of_domain_usage	02629410	0
08014860	_instance_hypernym	08392137	1
09111168	_similar_to	04947628	0
02011810	_derivationally_related_form	01778568	1
02136285	_verb_group	13753740	0
06960298	_derivationally_related_form	02957823	1
02653497	_verb_group	10485440	0
02658944	_member_meronym	02659176	1
01821634	_has_part	01453188	0
00853633	_derivationally_related_form	00431005	1
14604959	_instance_hypernym	13003254	0
13010219	_hypernym	11590783	1
06369829	_hypernym	14752057	0
12060546	_hypernym	12041446	1
13030852	_similar_to	15171008	0
02329093	_member_meronym	02329401	1
07842753	_verb_group	02595702	0
02535909	_member_meronym	02536864	1
06883073	_member_meronym	09693372	0
02354950	_member_meronym	02355711	1
01474283	_similar_to	10595361	0
02400139	_member_meronym	02407959	1
00918471	_derivationally_related_form	01547001	0
10082146	_derivationally_related_form	00991838	1
08726463	_member_meronym	01844859	0
08723006	_member_of_domain_region	05915584	1
10641223	_member_of_domain_region	09545324	0
09721244	_derivationally_related_form	08961402	1
01349493	_instance_hypernym	02343772	0
06295235	_member_of_domain_usage	07140348	1
14411243	_synset_domain_topic_of	08250635	0
02660769	_member_meronym	02661765	1
01876180	_synset_domain_topic_of	01282466	0
02366702	_member_meronym	02366825	1
01884348	_verb_group	13875185	0
01244593	_derivationally_related_form	00038365	1
09719430	_hypernym	02658531	0
09095023	_has_part	09095751	1
09134999	_member_of_domain_usage	10472799	0
04051825	_derivationally_related_form	01130607	1
01277288	_verb_group	14672224	0
02672859	_derivationally_related_form	13529616	1
09678009	_derivationally_related_form	03962525	0
14883206	_derivationally_related_form	00443670	1
01324799	_instance_hypernym	01884348	0
09095751	_has_part	03009477	1
14752057	_also_see	08549480	0
00902932	_hypernym	00897241	1
01304121	_member_meronym	02369012	0
12998349	_member_meronym	13016457	1
02589955	_hypernym	01164874	0
03568653	_hypernym	03828465	1
09192973	_instance_hypernym	08549480	0
08723006	_has_part	09327881	1
02601921	_also_see	14894140	0
09051235	_has_part	09075842	1
02580991	_similar_to	03757925	0
08860123	_member_of_domain_region	08555333	1
13623054	_hypernym	09058071	0
00159899	_derivationally_related_form	00880227	1
09066948	_similar_to	02553196	0
12963796	_member_meronym	12965209	1
14604959	_also_see	08396537	0
01604251	_derivationally_related_form	00299680	1
02136285	_verb_group	09397391	0
13011856	_member_meronym	13012030	1
02589955	_also_see	02136285	0
02716866	_hypernym	02716205	1
02558350	_derivationally_related_form	02658531	0
08766988	_has_part	08775784	1
07803992	_derivationally_related_form	03909835	0
00491689	_derivationally_related_form	09440186	1
09678009	_derivationally_related_form	09234104	0
09095023	_has_part	09306031	1
00842692	_similar_to	03966976	0
01471070	_member_meronym	01626134	1
01304121	_verb_group	01821634	0
00897241	_derivationally_related_form	06630017	1
00585810	_derivationally_related_form	02377480	0
12979630	_hypernym	11592146	1
07803992	_synset_domain_topic_of	00329819	0
01542207	_verb_group	01541579	1
08570758	_member_of_domain_usage	08782976	0
01503061	_has_part	01896031	1
08804487	_verb_group	03663433	0
02640857	_hypernym	02640242	1
07803992	_derivationally_related_form	10595361	0
14487731	_derivationally_related_form	00493259	1
09472597	_member_of_domain_region	02398463	0
02074915	_member_meronym	02083038	1
08936303	_similar_to	14604959	0
01645278	_hypernym	01626600	1
09356080	_member_meronym	01015996	0
13065215	_member_meronym	13065514	1
02934168	_also_see	06263609	0
00230172	_derivationally_related_form	02156546	1
06883073	_member_meronym	08549480	0
08801678	_has_part	08804962	1
10485440	_hypernym	02630468	0
02534734	_has_part	07795751	1
02952109	_verb_group	03962525	0
02117900	_hypernym	02117135	1
00233614	_hypernym	05949937	0
04412727	_hypernym	02720201	1
01883920	_derivationally_related_form	09453288	0
00853633	_derivationally_related_form	10221312	1
02952109	_hypernym	09397391	0
01015996	_derivationally_related_form	10366779	1
03198951	_synset_domain_topic_of	00855295	0
02648313	_hypernym	02647660	1
10490421	_member_of_domain_usage	02751782	0
14996020	_derivationally_related_form	01245637	1
09058071	_similar_to	08012765	0
04879658	_derivationally_related_form	00963283	1
04018399	_hypernym	10595361	0
09075842	_has_part	09076675	1
07803992	_member_of_domain_region	02652132	0
02641825	_member_meronym	02646377	1
02513742	_member_of_domain_usage	01304121	0
15155220	_has_part	15165490	1
02558350	_hypernym	01319874	0
14599641	_derivationally_related_form	00264875	1
13048666	_derivationally_related_form	09192973	0
10338094	_derivationally_related_form	02390101	1
01883920	_verb_group	04473432	0
02551824	_member_meronym	02552171	1
15171008	_member_of_domain_usage	03352961	0
06845599	_member_of_domain_usage	04407007	1
02630468	_has_part	15169421	0
01299735	_has_part	01295918	1
00329819	_member_meronym	08214272	0
01647803	_member_meronym	01648001	1
02415577	_derivationally_related_form	02377480	0
08860123	_member_of_domain_region	04314522	1
02580991	_hypernym	09453288	0
08766988	_member_of_domain_region	09222742	1
01821634	_also_see	08012765	0
02136271	_derivationally_related_form	04069276	1
03663433	_derivationally_related_form	10595361	0
04010348	_hypernym	02720725	1
02660769	_member_of_domain_usage	06310945	0
08860123	_member_of_domain_region	08504851	1
13875185	_member_of_domain_usage	04993882	0
02379753	_derivationally_related_form	00212205	1
02660769	_member_meronym	09478355	0
04733204	_derivationally_related_form	02262542	1
06776783	_hypernym	02608004	0
13060689	_member_meronym	13060912	1
02415577	_member_of_domain_usage	00627437	0
04473432	_derivationally_related_form	01953810	1
06883073	_member_of_domain_region	02509197	0
07229747	_hypernym	07229530	1
04229107	_derivationally_related_form	00842692	0
08780881	_has_part	08783286	1
08549480	_has_part	02456147	0
14686913	_derivationally_related_form	00442267	1
02540670	_member_meronym	09155986	0
13054211	_member_meronym	13055009	1
02580991	_also_see	02989685	0
12039743	_member_meronym	12045352	1
01164874	_member_of_domain_region	13030438	0
01915131	_derivationally_related_form	02898711	1
07649463	_synset_domain_topic_of	09144117	0
08305942	_hypernym	08168978	1
08764561	_synset_domain_topic_of	04242704	0
08860123	_member_of_domain_region	03702719	1
03918297	_derivationally_related_form	08800676	0
07673397	_hypernym	07672135	1
02509694	_similar_to	09545324	0
03519578	_hypernym	03519981	1
08851034	_synset_domain_topic_of	08122141	0
01640383	_member_meronym	01640567	1
01457082	_derivationally_related_form	02398463	0
02641608	_member_meronym	02651846	1
10460033	_member_of_domain_usage	01645278	0
01465994	_member_meronym	01467986	1
04221994	_derivationally_related_form	12048772	0
03467517	_hypernym	04338517	1
14604959	_verb_group	01128071	0
13030852	_hypernym	13028611	1
00233614	_member_of_domain_region	09356080	0
02412440	_derivationally_related_form	00058265	1
12977296	_has_part	01442591	0
08174398	_member_meronym	08780881	1
08012765	_verb_group	04107984	0
02854739	_hypernym	04508489	1
14672224	_member_of_domain_usage	09356080	0
02389346	_verb_group	02389592	1
01645278	_verb_group	09772746	0
14807929	_hypernym	05407119	1
12975608	_synset_domain_topic_of	04419315	0
12985236	_hypernym	11592146	1
09155986	_similar_to	10311661	0
14859622	_hypernym	14961512	1
14040660	_also_see	04535524	0
02505809	_member_meronym	02505998	1
07667326	_verb_group	07678193	0
06871384	_derivationally_related_form	01050896	1
00233614	_instance_hypernym	04535524	0
13016457	_member_meronym	13232515	1
00252710	_also_see	08570758	0
02659808	_hypernym	02658079	1
08082236	_verb_group	02398463	0
09070793	_has_part	02956500	1
01645093	_member_of_domain_region	09545324	0
00432839	_derivationally_related_form	14489113	1
07775905	_also_see	01349493	0
09368224	_derivationally_related_form	08641113	1
14752057	_derivationally_related_form	10490421	0
00680485	_derivationally_related_form	06211078	1
01349493	_has_part	02068206	0
02340186	_hypernym	02339922	1
14411243	_member_of_domain_region	10490421	0
02175958	_derivationally_related_form	04989657	1
08800676	_derivationally_related_form	12975608	0
00086835	_derivationally_related_form	00824054	1
02456147	_hypernym	00356367	0
13000372	_member_meronym	13005568	1
08782976	_instance_hypernym	14672224	0
09117351	_has_part	09192973	1
07667326	_has_part	00991838	0
09761068	_derivationally_related_form	02470685	1
02650928	_member_meronym	09111168	0
02399000	_hypernym	02394477	1
13030852	_similar_to	00485711	0
13753585	_hypernym	13745420	1
15159819	_instance_hypernym	10485440	0
10621514	_derivationally_related_form	00849294	1
01084180	_member_of_domain_usage	02952109	0
09095023	_member_of_domain_region	01283935	1
08250635	_hypernym	03922412	0
08860123	_member_of_domain_region	09351547	1
01293167	_hypernym	07450549	0
00772813	_derivationally_related_form	00963283	1
12084746	_member_of_domain_region	07380144	0
09284015	_derivationally_related_form	01567888	1
10215623	_member_of_domain_usage	09472597	0
02071294	_hypernym	02068974	1
01268112	_member_of_domain_usage	12058822	0
07622261	_derivationally_related_form	01265740	1
02136285	_member_of_domain_usage	02530421	0
08095647	_member_meronym	08096474	1
01320513	_member_meronym	13950812	0
00410406	_derivationally_related_form	09738708	1
02456147	_verb_group	04438742	0
02549533	_member_meronym	02549796	1
01268112	_synset_domain_topic_of	01885367	0
06845599	_member_of_domain_usage	14753414	1
14607521	_similar_to	01084180	0
06695862	_derivationally_related_form	00880227	1
10485440	_member_of_domain_usage	02136285	0
00883635	_hypernym	00883226	1
10550090	_hypernym	02630468	0
02649218	_hypernym	02648625	1
02650928	_also_see	13048666	0
01645634	_hypernym	01626134	1
04947628	_has_part	01293167	0
14836468	_hypernym	14732946	1
09144117	_similar_to	09110229	0
09709001	_hypernym	09708405	1
00089657	_verb_group	02457408	0
08554440	_hypernym	08553535	1
09807754	_verb_group	00252710	0
13077033	_hypernym	12992868	1
07851054	_hypernym	01645093	0
13043516	_hypernym	11590783	1
02595339	_similar_to	03976268	0
13575433	_derivationally_related_form	00458754	1
02595569	_member_of_domain_usage	00991838	0
01398941	_derivationally_related_form	04049405	1
10382825	_verb_group	09194357	0
02528534	_member_meronym	02541431	1
07667326	_derivationally_related_form	09351647	0
08801678	_member_of_domain_region	06964247	1
08782976	_instance_hypernym	14040660	0
08368308	_derivationally_related_form	02875499	1
03519981	_instance_hypernym	02629410	0
02425086	_hypernym	02419796	1
02456147	_has_part	02509694	0
01640383	_member_meronym	01640846	1
00052146	_verb_group	09111168	0
08563627	_has_part	09057311	1
02136285	_synset_domain_topic_of	09772746	0
08801099	_member_meronym	09696124	1
05385363	_member_of_domain_region	15169421	0
01190840	_derivationally_related_form	07891726	1
00223854	_derivationally_related_form	00918471	0
09301249	_instance_hypernym	09241247	1
07623933	_has_part	10160624	0
01883212	_member_meronym	01883513	1
00485711	_has_part	03976268	0
09071690	_has_part	09378014	1
02601921	_member_meronym	03966976	0
08342039	_hypernym	08339454	1
04473432	_has_part	03198951	0
04353016	_hypernym	04352070	1
08549480	_hypernym	04107984	0
13070003	_hypernym	11590783	1
07649463	_member_meronym	09091398	0
02607630	_member_meronym	02609466	1
13010219	_member_meronym	02509694	0
13039870	_member_meronym	13040108	1
02343772	_instance_hypernym	09397391	0
02535349	_member_meronym	02535537	1
15183802	_derivationally_related_form	04438742	0
00105778	_derivationally_related_form	09930876	1
01646528	_similar_to	02682424	0
09682803	_derivationally_related_form	08095647	1
09066948	_member_of_domain_usage	08549480	0
01890860	_hypernym	01889520	1
01821634	_member_meronym	03093574	0
02936020	_derivationally_related_form	06321702	1
06366581	_also_see	04947628	0
15169248	_hypernym	15228378	1
09545324	_member_meronym	07851054	0
03933529	_derivationally_related_form	02331175	1
08936303	_synset_domain_topic_of	03098140	0
10272171	_hypernym	09886010	1
03534890	_hypernym	02133902	0
14599168	_hypernym	14739360	1
10382825	_member_of_domain_usage	02682424	0
13060451	_member_meronym	13062112	1
09453288	_has_part	10311661	0
00252710	_derivationally_related_form	15147850	1
09194357	_derivationally_related_form	14299336	0
02521241	_member_meronym	02525543	1
06195698	_hypernym	09736633	0
10146927	_derivationally_related_form	00899597	1
14607521	_verb_group	04418644	0
05951969	_derivationally_related_form	10306279	1
09142674	_synset_domain_topic_of	03922412	0
03315644	_derivationally_related_form	01271189	1
03186005	_synset_domain_topic_of	09356080	0
02435853	_hypernym	02399000	1
08851034	_derivationally_related_form	09144117	0
06845599	_member_of_domain_usage	03295357	1
09142674	_derivationally_related_form	09058071	0
04764741	_derivationally_related_form	00485711	1
02952109	_member_meronym	02630281	0
08723006	_member_of_domain_region	08321469	1
09719430	_has_part	13076181	0
09052314	_instance_hypernym	09044862	1
09332976	_verb_group	02136285	0
12083339	_member_meronym	12083591	1
07649463	_synset_domain_topic_of	08549480	0
09060768	_has_part	09358096	1
09356080	_similar_to	01474283	0
09044862	_has_part	09067277	1
05949937	_instance_hypernym	02967626	0
06214744	_derivationally_related_form	00408852	1
00052146	_similar_to	04438742	0
13037124	_hypernym	11592146	1
08790953	_also_see	00252710	0
00713250	_derivationally_related_form	01266895	1
03198951	_instance_hypernym	04107984	0
06845599	_member_of_domain_usage	14747168	1
01439121	_also_see	02653497	0
08801678	_member_of_domain_region	08541609	1
09545324	_member_of_domain_usage	03098140	0
13298935	_hypernym	13298701	1
06880664	_synset_domain_topic_of	02485451	0
02409202	_hypernym	02407959	1
04018399	_instance_hypernym	13875185	0
08860123	_member_of_domain_region	06699225	1
06767777	_derivationally_related_form	04947628	0
00105778	_derivationally_related_form	00427580	1
01928390	_instance_hypernym	03519981	0
07858595	_derivationally_related_form	02195470	1
02398854	_member_of_domain_usage	01915365	0
13015229	_hypernym	11592146	1
13533470	_member_of_domain_usage	09144117	0
08174398	_member_meronym	09039411	1
10490421	_member_of_domain_region	09111168	0
00419137	_derivationally_related_form	07443210	1
02658531	_hypernym	02652132	0
06845599	_member_of_domain_usage	03155334	1
02627292	_verb_group	05525100	0
05716744	_derivationally_related_form	02196690	1
03021531	_similar_to	01293167	0
02420789	_derivationally_related_form	00719705	1
09772746	_hypernym	15159819	0
01468238	_hypernym	01466257	1
01646528	_has_part	03962525	0
00575970	_derivationally_related_form	15055633	1
00233614	_also_see	05949937	0
09232165	_instance_hypernym	09475292	1
02989685	_member_of_domain_region	00991838	0
08124971	_has_part	08125722	1
04535524	_member_of_domain_usage	08570758	0
12998349	_member_meronym	13074084	1
02558350	_member_of_domain_region	05949937	0
08641113	_derivationally_related_form	10352299	1
03757925	_member_of_domain_region	03198951	0
06201908	_derivationally_related_form	00680346	1
13010219	_has_part	00052146	0
00880227	_derivationally_related_form	06695579	1
04229107	_member_of_domain_region	02720725	0
08984788	_has_part	09453566	1
01457082	_member_of_domain_region	09472597	0
06845599	_member_of_domain_usage	04006953	1
08800676	_member_meronym	01885367	0
02066707	_hypernym	02062744	1
00233614	_member_meronym	07678193	0
08929922	_member_of_domain_region	13753274	1
13048666	_also_see	03021531	0
01126846	_hypernym	01127411	1
06310945	_instance_hypernym	09111168	0
06413889	_derivationally_related_form	07009946	1
06310945	_hypernym	13003254	0
12968408	_member_meronym	12970379	1
02398854	_member_meronym	02630052	0
09127461	_instance_hypernym	09399592	1
02062991	_derivationally_related_form	02343187	0
00883226	_derivationally_related_form	07230089	1
04993882	_member_of_domain_region	06310945	0
00135285	_derivationally_related_form	06372095	1
07803992	_derivationally_related_form	01086945	0
10490421	_hypernym	09841188	1
01543731	_member_of_domain_region	10490421	0
04051068	_hypernym	02673637	1
04221994	_synset_domain_topic_of	02630281	0
02340930	_hypernym	02339376	1
01084180	_member_of_domain_region	02632239	0
08929922	_member_of_domain_region	06964901	1
01293167	_similar_to	08122141	0
02593863	_member_meronym	02596888	1
09144117	_similar_to	08095647	0
06845599	_member_of_domain_usage	04476633	1
01128071	_also_see	02343187	0
09119277	_has_part	04604009	1
03074922	_member_meronym	14894140	0
08674970	_derivationally_related_form	02468965	1
10595361	_instance_hypernym	08800676	0
00105554	_derivationally_related_form	00431005	1
06263609	_also_see	02133902	0
09038990	_has_part	09719430	1
05525100	_member_meronym	09719430	0
09243405	_instance_hypernym	09215664	1
10490421	_verb_group	07450549	0
15159583	_derivationally_related_form	00734927	1
09313716	_member_of_domain_usage	07842753	0
02633677	_hypernym	02632989	1
14411243	_has_part	13533470	0
00485711	_derivationally_related_form	04764741	1
07752264	_also_see	01290435	0
01896031	_has_part	01897991	1
08851034	_member_meronym	09545324	0
01696135	_derivationally_related_form	04694809	1
09678009	_similar_to	04993882	0
03670622	_hypernym	02716866	1
02934168	_derivationally_related_form	14672224	0
09087599	_has_part	09368479	1
09332976	_instance_hypernym	12977296	0
08149781	_hypernym	08081668	1
02630052	_hypernym	09273447	0
09260466	_hypernym	09416076	1
01453330	_verb_group	09478355	0
13024763	_member_meronym	13024967	1
09678009	_derivationally_related_form	10382825	0
02534352	_member_meronym	02535349	1
09110229	_similar_to	08095647	0
01891438	_member_meronym	01891633	1
10160624	_member_of_domain_region	13064678	0
03612814	_hypernym	03990474	1
00842692	_has_part	02595339	0
09044862	_has_part	09111366	1
13623054	_has_part	02369012	0
03662016	_hypernym	03681148	1
06195698	_similar_to	01821634	0
02396796	_hypernym	02395003	1
06880664	_member_of_domain_region	13064678	0
09082540	_has_part	09084483	1
03093574	_similar_to	10641223	0
10318892	_derivationally_related_form	01743531	1
00233614	_derivationally_related_form	02595569	0
12978969	_hypernym	11590783	1
08800676	_also_see	05385363	0
06845599	_member_of_domain_usage	04443588	1
04947628	_hypernym	03198951	0
02989475	_hypernym	02996840	1
07635155	_verb_group	00991838	0
06344461	_hypernym	06343971	1
02553196	_instance_hypernym	09332976	0
01874928	_hypernym	01874434	1
01128071	_member_of_domain_usage	09313716	0
15228378	_hypernym	15129927	1
09452395	_verb_group	09692624	0
10352299	_derivationally_related_form	08641113	1
09194357	_member_of_domain_region	07775905	0
02068735	_member_meronym	02069569	1
09692624	_verb_group	02540670	0
02324045	_has_part	02158739	1
08012765	_instance_hypernym	09877443	0
02356108	_member_meronym	02355477	1
08095647	_verb_group	13010219	0
03362393	_hypernym	02715941	1
03757925	_also_see	15171008	0
05681117	_has_part	05768553	1
01821634	_derivationally_related_form	06310945	0
07427337	_derivationally_related_form	00223500	1
08785958	_also_see	06310945	0
10582154	_derivationally_related_form	02540670	1
02601921	_verb_group	09719430	0
09078231	_member_of_domain_region	02581957	1
01543731	_hypernym	09959258	0
02507337	_member_meronym	02509694	1
10595361	_instance_hypernym	04535524	0
10268299	_derivationally_related_form	02614387	1
08214272	_verb_group	08404895	0
07443210	_derivationally_related_form	00441212	1
00585810	_has_part	09678009	0
08780881	_member_of_domain_region	09542697	1
01164874	_verb_group	12977296	0
02015168	_derivationally_related_form	00057306	1
08396537	_also_see	04955160	0
09039411	_member_of_domain_region	06340047	1
01543731	_derivationally_related_form	03922412	0
02430191	_derivationally_related_form	01081456	1
02650928	_similar_to	09332976	0
06845599	_member_of_domain_usage	03588668	1
01457082	_derivationally_related_form	03962525	0
06295235	_member_of_domain_usage	09212572	1
01282466	_member_of_domain_usage	08570758	0
02335349	_member_meronym	02338029	1
03519981	_member_meronym	09692624	0
13007770	_hypernym	11592146	1
07635155	_verb_group	02967626	0
07679356	_derivationally_related_form	01337653	1
00855295	_member_of_domain_region	07775905	0
02331309	_hypernym	02331046	1
02751782	_also_see	02502357	0
00680346	_hypernym	00680145	1
00918471	_instance_hypernym	12975608	0
08986066	_instance_hypernym	08691669	1
01128071	_also_see	09313716	0
11517494	_derivationally_related_form	00073584	1
00356367	_member_meronym	02595702	0
09067277	_has_part	09373716	1
01084180	_member_of_domain_region	09194357	0
00842692	_derivationally_related_form	01186428	1
09693372	_also_see	08936303	0
00492677	_derivationally_related_form	08615374	1
06366581	_similar_to	02456147	0
13005329	_hypernym	12998815	1
09452395	_verb_group	02595569	0
07653394	_hypernym	07649854	1
02369012	_hypernym	01543731	0
10382825	_derivationally_related_form	03854065	1
09111168	_synset_domain_topic_of	04438742	0
02652668	_hypernym	02552171	1
03098140	_member_of_domain_usage	09693372	0
00088725	_derivationally_related_form	01215137	1
14894140	_also_see	12963140	0
02453890	_member_meronym	02456776	1
04018399	_synset_domain_topic_of	01915365	0
09400667	_instance_hypernym	09440186	1
03021531	_synset_domain_topic_of	08851034	0
01158572	_derivationally_related_form	13451804	1
02366825	_derivationally_related_form	06310945	0
07779747	_hypernym	07775905	1
02629410	_hypernym	05525100	0
01653026	_hypernym	01639765	1
02589955	_derivationally_related_form	01290435	0
02358091	_hypernym	02355227	1
04955160	_verb_group	01304121	0
04947628	_hypernym	04947186	1
04993882	_member_meronym	02660769	0
09075842	_has_part	09378014	1
09959258	_member_of_domain_region	04438742	0
08860123	_member_of_domain_region	07450343	1
02398854	_instance_hypernym	12084746	0
00040188	_derivationally_related_form	00256961	1
04418644	_synset_domain_topic_of	01453330	0
02411705	_has_part	02439568	1
04473432	_instance_hypernym	02627292	0
09044862	_has_part	09059274	1
02660769	_instance_hypernym	00627437	0
00991838	_derivationally_related_form	14864360	1
08549480	_also_see	08012765	0
02510455	_hypernym	02507649	1
04586932	_member_of_domain_usage	01876180	0
02546075	_derivationally_related_form	10183757	1
04229107	_has_part	08790953	0
02553196	_member_meronym	02621721	1
03654086	_similar_to	02398463	0
00191517	_derivationally_related_form	13496771	1
04242704	_derivationally_related_form	09234104	0
02400139	_member_meronym	02409702	1
08250635	_synset_domain_topic_of	02136285	0
14841267	_derivationally_related_form	02112891	1
09234104	_synset_domain_topic_of	15159819	0
01167981	_derivationally_related_form	08253815	1
07803992	_hypernym	01449586	0
00492677	_derivationally_related_form	04764741	1
14607521	_has_part	09472597	0
02341475	_hypernym	02339376	1
13030438	_also_see	01543731	0
10162354	_derivationally_related_form	03497657	1
02595702	_has_part	09144117	0
02130308	_hypernym	02127808	1
10641223	_member_of_domain_usage	04419315	0
01141938	_derivationally_related_form	02062744	1
09478355	_member_of_domain_region	05385363	0
07590611	_hypernym	07588947	1
09155986	_instance_hypernym	03966976	0
02380009	_derivationally_related_form	10525617	1
00088713	_hypernym	02377480	0
01888520	_member_meronym	01893535	1
15171008	_also_see	03198951	0
01560369	_derivationally_related_form	00360242	1
03586631	_member_of_domain_usage	00052146	0
01648494	_member_meronym	01648620	1
13875185	_has_part	01453330	0
09194357	_has_part	09357847	1
01449586	_hypernym	01883920	0
12967776	_hypernym	11590783	1
07380144	_member_of_domain_region	12084746	0
08932568	_has_part	08933621	1
09053019	_synset_domain_topic_of	08505573	0
01445027	_derivationally_related_form	14757547	1
15183802	_member_of_domain_region	01304121	0
02457756	_member_meronym	02457945	1
01439121	_hypernym	00918471	0
13660178	_derivationally_related_form	00491689	1
03962525	_member_of_domain_region	07775905	0
01130607	_derivationally_related_form	04051825	1
02102605	_member_of_domain_usage	04418644	0
06845599	_member_of_domain_usage	15071684	1
12048772	_verb_group	00223854	0
02602212	_derivationally_related_form	07515974	1
01876180	_member_meronym	03976268	0
03497657	_has_part	02902079	1
03654086	_synset_domain_topic_of	04349701	0
09103943	_has_part	09459557	1
09719430	_similar_to	05949937	0
00161739	_derivationally_related_form	01696648	1
04418644	_instance_hypernym	02377480	0
08133189	_hypernym	08337324	1
03534890	_synset_domain_topic_of	00252710	0
00799537	_derivationally_related_form	02414473	1
01290435	_instance_hypernym	08787466	0
13205482	_member_meronym	13210006	1
13064678	_member_of_domain_region	05949937	0
08860123	_member_of_domain_region	04441528	1
10641223	_also_see	00052146	0
09109444	_has_part	09109882	1
01543731	_also_see	08787466	0
01305361	_hypernym	02085742	1
04993882	_member_of_domain_region	02630052	0
02336011	_hypernym	02329401	1
02485451	_member_meronym	03909835	0
03970363	_hypernym	02896442	1
13076181	_also_see	07678193	0
03061081	_derivationally_related_form	05996646	1
01453330	_verb_group	02136285	0
13486270	_derivationally_related_form	00442267	1
15159819	_derivationally_related_form	01645278	0
01382818	_derivationally_related_form	01639765	1
10460033	_similar_to	09678009	0
02673480	_hypernym	02832168	1
13753740	_has_part	08726463	0
08860123	_member_of_domain_region	07635155	1
02630281	_hypernym	00855295	0
13006377	_hypernym	11592146	1
02658531	_member_of_domain_region	09692624	0
01075117	_hypernym	00954086	1
09114696	_similar_to	02595339	0
02784732	_derivationally_related_form	01273263	1
01453188	_synset_domain_topic_of	09959258	0
06295235	_member_of_domain_usage	03885028	1
09134999	_has_part	07667326	0
00089154	_derivationally_related_form	14283632	1
08549480	_hypernym	09058071	0
02907985	_instance_hypernym	04511002	1
14607521	_synset_domain_topic_of	02630281	0
15058163	_hypernym	15057744	1
02102605	_hypernym	03962525	0
08910668	_has_part	09237404	1
01453330	_derivationally_related_form	03962525	0
14276936	_hypernym	14070360	1
01885367	_member_of_domain_usage	04349701	0
08214470	_hypernym	08190754	1
02136285	_member_of_domain_region	10382825	0
13038944	_member_meronym	13046285	1
08804487	_has_part	00088713	0
00366858	_derivationally_related_form	15055633	1
03962525	_member_of_domain_region	01915365	0
08860123	_member_of_domain_region	13359941	1
09545324	_derivationally_related_form	09959258	0
02652979	_member_meronym	02653359	1
13875185	_member_of_domain_region	12048772	0
13029946	_member_meronym	13030157	1
14604959	_member_meronym	00052146	0
09114696	_has_part	09418484	1
14752057	_also_see	06767777	0
03914919	_derivationally_related_form	01543731	1
02485451	_derivationally_related_form	02627292	0
09109444	_has_part	09441725	1
08082236	_similar_to	02136285	0
05410646	_hypernym	05407119	1
03966976	_member_of_domain_region	13030852	0
13063269	_hypernym	12992868	1
03962525	_instance_hypernym	00855295	0
03928814	_hypernym	03614007	1
02369012	_synset_domain_topic_of	02509694	0
02483915	_member_meronym	02484473	1
03098140	_synset_domain_topic_of	06369829	0
02068206	_hypernym	02066707	1
09201301	_verb_group	02934168	0
02654425	_hypernym	02652668	1
03976268	_synset_domain_topic_of	06776783	0
06845599	_member_of_domain_usage	03554131	1
10209731	_synset_domain_topic_of	03186005	0
00483656	_derivationally_related_form	06863751	1
08851034	_similar_to	07842753	0
13063046	_hypernym	11594676	1
01646528	_derivationally_related_form	13875185	0
00604617	_derivationally_related_form	04718563	1
02477890	_has_part	01324799	0
06295235	_member_of_domain_usage	04323819	1
02136285	_member_of_domain_region	02369012	0
01144550	_derivationally_related_form	02443484	1
00374668	_member_of_domain_region	09452395	0
09049599	_has_part	09103943	1
00223854	_member_of_domain_region	13753740	0
13003522	_hypernym	12998815	1
00356367	_has_part	03093574	0
14974264	_derivationally_related_form	01268457	1
09545324	_also_see	09736633	0
08860123	_member_of_domain_region	07889814	1
02346627	_member_of_domain_region	03922412	0
02355477	_hypernym	02355227	1
04018399	_synset_domain_topic_of	00627437	0
09060768	_has_part	09326467	1
13010219	_derivationally_related_form	09058071	0
06510977	_derivationally_related_form	02896789	1
01453330	_also_see	02343772	0
04248851	_derivationally_related_form	01480770	1
10489944	_synset_domain_topic_of	13950812	0
01758308	_derivationally_related_form	01173813	1
01304121	_also_see	02650928	0
14705718	_derivationally_related_form	01354006	1
02630281	_verb_group	00855295	0
09044862	_member_of_domain_region	08303692	1
01446760	_has_part	04473432	0
12992464	_member_meronym	11592146	1
08800676	_similar_to	12084746	0
03747746	_hypernym	03771443	1
09110229	_member_of_domain_region	01304121	0
13031956	_hypernym	11592146	1
02650928	_instance_hypernym	07649463	0
01320513	_derivationally_related_form	10587227	1
02513742	_hypernym	00356367	0
02485451	_derivationally_related_form	01164874	1
08012765	_member_of_domain_usage	03021531	0
01193099	_derivationally_related_form	00840630	1
02632239	_has_part	02653497	0
13210006	_hypernym	13167078	1
09234104	_instance_hypernym	03222959	0
03550533	_hypernym	02718469	1
01294791	_member_meronym	00356367	0
02590237	_member_meronym	02592244	1
03918297	_member_of_domain_region	01457082	0
02373093	_member_meronym	02373601	1
02934168	_instance_hypernym	02629410	0
12982103	_hypernym	11590783	1
02530421	_similar_to	02682424	0
04353410	_hypernym	03828465	1
05638778	_synset_domain_topic_of	10490421	0
02072355	_member_meronym	02072493	1
02630468	_similar_to	02630468	0
09711132	_hypernym	09710164	1
09122968	_also_see	01268112	0
01290435	_instance_hypernym	01075117	1
13042814	_verb_group	06310945	0
09250165	_instance_hypernym	09453008	1
13076181	_derivationally_related_form	02652132	0
02156063	_derivationally_related_form	13773361	1
02630281	_member_of_domain_usage	13875185	0
09114696	_has_part	09228619	1
07803992	_also_see	10595361	0
01284444	_instance_hypernym	00223983	1
02457408	_instance_hypernym	02136285	0
09044862	_has_part	09089139	1
02595569	_also_see	09692624	0
02380980	_hypernym	01766952	1
07623933	_hypernym	00374668	0
02553196	_member_meronym	02618244	1
08549480	_member_of_domain_usage	06366581	0
12996225	_member_meronym	13065902	1
10641223	_also_see	02630281	0
06367373	_derivationally_related_form	01635176	1
15169421	_also_see	09472597	0
13068434	_hypernym	13066129	1
00089657	_member_meronym	12977296	0
02325211	_member_meronym	02325366	1
07623933	_hypernym	07667326	0
02554235	_derivationally_related_form	10663315	1
02967626	_derivationally_related_form	01319874	0
02574651	_member_meronym	02574910	1
02502357	_derivationally_related_form	13003254	0
06295235	_member_of_domain_usage	09269972	1
09332976	_hypernym	02346627	0
01546660	_member_meronym	01547459	1
00223854	_instance_hypernym	04018399	0
00288486	_derivationally_related_form	01928730	1
02346627	_derivationally_related_form	07842753	0
09048880	_has_part	09092497	1
03962525	_synset_domain_topic_of	12979129	0
06295235	_member_of_domain_usage	01042764	1
07635155	_member_of_domain_region	01282466	0
00719705	_derivationally_related_form	02461063	1
02540670	_synset_domain_topic_of	14672224	0
02590910	_derivationally_related_form	10788852	1
02415577	_has_part	02354621	0
00964105	_instance_hypernym	00962129	1
03654086	_member_meronym	00585810	0
09141526	_has_part	09388121	1
01324799	_derivationally_related_form	02398463	0
10792335	_derivationally_related_form	01778017	1
08095647	_member_of_domain_region	01444164	0
02597367	_hypernym	02594250	1
01293167	_similar_to	09091398	0
02346315	_member_meronym	02346823	1
02137549	_hypernym	10550090	0
00201058	_derivationally_related_form	01972131	1
12048772	_similar_to	02530421	0
09152944	_has_part	09153710	1
01547001	_member_of_domain_region	09772746	0
02564403	_hypernym	02562315	1
09959258	_member_of_domain_region	10490421	0
13030157	_member_meronym	13030438	1
08782976	_verb_group	12977565	0
15165289	_has_part	15169136	1
06310945	_derivationally_related_form	00356367	0
02133704	_hypernym	02131653	1
02630281	_instance_hypernym	12058822	0
09044862	_has_part	09075842	1
09877443	_hypernym	06195698	0
00962722	_derivationally_related_form	02583780	1
15171008	_similar_to	10595361	0
02072159	_derivationally_related_form	00914343	1
02343187	_has_part	08936303	0
08932568	_has_part	08933940	1
03586631	_verb_group	08250635	0
10075529	_derivationally_related_form	06371413	1
04229107	_verb_group	03352961	0
01883513	_hypernym	01874434	1
14607521	_instance_hypernym	08082236	0
05010801	_derivationally_related_form	02675458	1
02652132	_member_of_domain_usage	03757925	0
01649948	_member_meronym	01650167	1
15183802	_synset_domain_topic_of	01128071	0
09138935	_has_part	09320985	1
03093574	_member_meronym	09066948	0
09237076	_has_part	09405169	1
09736633	_member_meronym	02553196	0
02688623	_derivationally_related_form	07802417	1
01453188	_has_part	02502357	0
04236001	_derivationally_related_form	02701445	1
01883920	_similar_to	02133902	0
03200357	_hypernym	03895866	1
09807754	_member_of_domain_region	01015996	0
03718056	_hypernym	03214670	1
10489944	_hypernym	08790953	0
01644104	_hypernym	01626134	1
14040660	_verb_group	09692624	0
09044862	_has_part	09078231	1
09959258	_also_see	04955160	0
00751389	_derivationally_related_form	00848466	1
01442591	_member_of_domain_region	02595702	0
09219078	_instance_hypernym	09403734	1
07775905	_member_of_domain_region	04018399	0
02546744	_member_meronym	02546873	1
04993882	_derivationally_related_form	02398854	0
05043973	_derivationally_related_form	02112029	1
03918297	_similar_to	01547001	0
01649948	_member_meronym	01652163	1
02627292	_member_of_domain_usage	01876180	0
09078231	_derivationally_related_form	02738760	1
02558350	_instance_hypernym	13030852	0
02989893	_hypernym	02996840	1
03093574	_hypernym	09110229	0
08860123	_member_of_domain_usage	10548227	1
10485440	_similar_to	08726463	0
