# Supplementary material
Source: ML conference proceedings conference paper supplement (https://proceedings.neurips.cc/paper_files/paper/2021/hash/0fd600c953cde8121262e322ef09f70e-Abstract.html)
Supplement: Supplementary file 1 [file 0fd600c953cde8121262e322ef09f70e-Supplemental.zip › Supplementary_Material_Paper_8745/data/GraIL-BM_WN18RR_v3/test/test-random-sample/test3.txt]

02521241	_member_meronym	02521916	1
01349493	_has_part	10382825	0
02341974	_hypernym	02339376	1
00201058	_similar_to	12978381	0
03109350	_instance_hypernym	04511002	1
02589955	_synset_domain_topic_of	04955160	0
00053609	_derivationally_related_form	00426958	1
09397391	_also_see	04441282	0
01631759	_hypernym	01626134	1
02630052	_verb_group	13753740	0
08766988	_member_of_domain_region	09877443	1
01015996	_member_meronym	09356080	0
01215137	_derivationally_related_form	06547832	1
08549480	_member_of_domain_usage	07851054	0
02923510	_derivationally_related_form	06234825	1
04535524	_member_meronym	14040660	0
08897065	_has_part	09168020	1
07752264	_member_of_domain_usage	02509197	0
00014742	_hypernym	00014405	1
07775905	_member_of_domain_usage	08082236	0
00211108	_derivationally_related_form	13460568	1
09458791	_instance_hypernym	09717047	0
02354781	_hypernym	02353861	1
02652132	_member_of_domain_usage	06776783	0
14894140	_hypernym	14727670	1
06880664	_similar_to	02458135	0
02441723	_member_meronym	02442845	1
02398463	_synset_domain_topic_of	00585810	0
00963283	_derivationally_related_form	06790042	1
09082540	_member_of_domain_usage	10113362	0
02832818	_derivationally_related_form	02720201	1
10641223	_similar_to	02136285	0
01153305	_derivationally_related_form	00369194	1
09201301	_has_part	05525100	0
02601589	_member_meronym	02601921	1
04107984	_derivationally_related_form	02346627	0
12043248	_member_meronym	12043444	1
02661317	_similar_to	02645304	0
01269360	_instance_hypernym	00223983	1
07667326	_has_part	02658531	0
00702226	_derivationally_related_form	04438304	1
09066948	_synset_domain_topic_of	09877443	0
02399000	_derivationally_related_form	01174555	1
01457082	_verb_group	13753740	0
09044862	_has_part	09110422	1
14607521	_member_of_domain_region	09234104	0
02453890	_member_meronym	02457586	1
02509197	_verb_group	02502357	0
01292727	_hypernym	01292534	1
10641223	_hypernym	04993882	0
02528534	_member_meronym	02540255	1
01086945	_similar_to	02720725	0
02583139	_derivationally_related_form	00962129	1
08787466	_member_of_domain_region	09091398	0
02927512	_derivationally_related_form	09044862	1
02062991	_hypernym	05638778	0
00492677	_also_see	02111684	1
10208189	_verb_group	03251766	0
02593863	_member_meronym	02595902	1
08396537	_hypernym	08851034	0
00210738	_derivationally_related_form	13077033	1
02398854	_hypernym	12967281	0
09044862	_member_of_domain_region	08122009	1
00374668	_instance_hypernym	01320513	0
03299648	_hypernym	03214670	1
14752057	_similar_to	09545324	0
04300080	_derivationally_related_form	01594362	1
02627292	_also_see	03757925	0
09401474	_instance_hypernym	09403734	1
02630468	_hypernym	03869222	0
09052652	_member_meronym	10802283	1
02447896	_similar_to	09702134	0
02398854	_derivationally_related_form	10271677	1
10472799	_verb_group	01277288	0
06778102	_derivationally_related_form	00853633	1
07066459	_also_see	09313716	0
03829085	_hypernym	02718811	1
02601921	_instance_hypernym	02720725	0
01478300	_member_meronym	01478511	1
10113362	_similar_to	01466828	0
12982723	_hypernym	11592146	1
01439121	_derivationally_related_form	02398854	0
01454856	_hypernym	02552171	1
09134999	_member_of_domain_region	06776783	0
02870092	_derivationally_related_form	06413889	1
04438742	_member_of_domain_usage	14604959	0
04186848	_derivationally_related_form	01560369	1
14299336	_verb_group	01884348	0
06845599	_member_of_domain_usage	02705651	1
13005329	_instance_hypernym	01889520	0
01262936	_derivationally_related_form	07738353	1
10472799	_verb_group	01876180	0
08564307	_has_part	09109444	1
01084180	_has_part	12084746	0
01042764	_hypernym	01041968	1
08082236	_has_part	12967281	0
08860123	_member_of_domain_region	04240576	1
02415577	_derivationally_related_form	04221994	0
09169801	_instance_hypernym	08505573	1
01277288	_instance_hypernym	09356080	0
07450343	_derivationally_related_form	00855295	1
10595361	_synset_domain_topic_of	12979129	0
12972818	_hypernym	11594676	1
04586932	_member_meronym	01876180	0
14607521	_derivationally_related_form	00264875	1
02456147	_has_part	03021531	0
15155220	_has_part	15227846	1
07775905	_synset_domain_topic_of	04993882	0
09131654	_has_part	09244972	1
03093574	_member_of_domain_region	01645093	0
05588174	_derivationally_related_form	02884456	1
02934168	_has_part	08404895	0
09714120	_derivationally_related_form	08953324	1
02989685	_member_of_domain_usage	01449586	0
09141526	_has_part	09145083	1
02682424	_synset_domain_topic_of	01457082	0
01639369	_member_meronym	01642671	1
02509197	_member_of_domain_region	09110229	0
00626800	_also_see	00625393	1
02595339	_member_of_domain_usage	01320513	0
06845599	_member_of_domain_usage	04006727	1
07618871	_also_see	02659808	0
08381820	_hypernym	08381636	1
08782976	_also_see	01928390	0
07556637	_derivationally_related_form	01167188	1
05959954	_similar_to	04497962	0
00854150	_derivationally_related_form	10221312	1
03352961	_member_of_domain_region	09114696	0
08136260	_hypernym	08348815	1
01274909	_verb_group	04497962	0
10181990	_hypernym	10024119	1
09114696	_derivationally_related_form	12963140	0
08860123	_member_of_domain_region	02463990	1
09089782	_synset_domain_topic_of	01164874	0
06845599	_member_of_domain_usage	03771066	1
13533470	_verb_group	08012765	0
06621447	_derivationally_related_form	02797021	1
02411427	_member_of_domain_usage	13005329	0
12992464	_member_meronym	12975207	1
01873310	_also_see	09292751	0
09682291	_derivationally_related_form	02923510	1
09100982	_verb_group	09242037	0
02424085	_hypernym	02419796	1
13003254	_derivationally_related_form	13030438	0
09119277	_has_part	09370383	1
02281485	_member_of_domain_usage	13752911	0
08860123	_member_of_domain_region	07722485	1
09731906	_instance_hypernym	01890860	0
14487731	_derivationally_related_form	00492706	1
04418644	_similar_to	01884348	0
04762355	_derivationally_related_form	00625393	1
09453288	_verb_group	01890860	0
13016457	_member_meronym	13001743	1
02582591	_instance_hypernym	03970363	0
01303582	_instance_hypernym	00962722	1
07851054	_derivationally_related_form	02366825	0
02536165	_has_part	07796165	1
06369829	_member_of_domain_usage	02456147	0
02601344	_has_part	07784367	1
04419315	_synset_domain_topic_of	02377480	0
08416652	_hypernym	08251877	1
14705533	_also_see	01285305	0
00963283	_derivationally_related_form	00963241	1
00918471	_member_of_domain_region	07380144	0
02176747	_hypernym	02176261	1
09458791	_derivationally_related_form	04760771	0
06214580	_derivationally_related_form	10619176	1
09194357	_hypernym	01349493	0
07689217	_hypernym	07689003	1
09959258	_also_see	02366825	0
12970379	_member_meronym	12970560	1
01635343	_instance_hypernym	15071684	0
10244913	_hypernym	09770949	1
01844859	_instance_hypernym	00223854	0
08780881	_member_of_domain_region	07036862	1
01319874	_similar_to	01277288	0
02066450	_member_meronym	02068735	1
12967281	_synset_domain_topic_of	04418644	0
09117351	_has_part	09123809	1
00052146	_synset_domain_topic_of	09693372	0
04352070	_hypernym	02716205	1
02398854	_member_meronym	13753740	0
13007417	_hypernym	12998815	1
08505573	_hypernym	08122141	0
03854065	_hypernym	04586932	1
04229107	_member_of_domain_usage	01883920	0
13002433	_member_meronym	13003522	1
03534890	_also_see	13950812	0
02655523	_hypernym	02652668	1
07803992	_member_of_domain_region	07678193	0
01245813	_derivationally_related_form	01078050	1
06349220	_instance_hypernym	09702134	0
13077295	_derivationally_related_form	00210738	1
01876180	_synset_domain_topic_of	07803992	0
08615638	_derivationally_related_form	01934427	1
09292751	_also_see	02535909	0
08860123	_member_of_domain_region	07696527	1
04418644	_member_of_domain_region	04018399	0
09078231	_member_of_domain_region	06938493	1
08095647	_similar_to	07851054	0
09048880	_has_part	09147964	1
03325769	_synset_domain_topic_of	03970363	0
08365855	_derivationally_related_form	09945603	1
02967626	_member_meronym	01449586	0
08505573	_hypernym	07941945	1
07752264	_instance_hypernym	02553196	0
01523823	_derivationally_related_form	01244593	1
02627292	_synset_domain_topic_of	02989685	0
00366858	_derivationally_related_form	13572436	1
08726463	_similar_to	10659393	0
01273016	_hypernym	01531742	1
07851054	_has_part	09053019	0
14994328	_derivationally_related_form	00266586	1
13003254	_has_part	02513742	0
09134386	_has_part	09192708	1
01466828	_derivationally_related_form	02586865	0
02353844	_derivationally_related_form	03427296	1
01873310	_also_see	04603872	0
12992464	_member_meronym	12992868	1
09268927	_has_part	01885367	0
01953810	_derivationally_related_form	04473432	1
06883073	_similar_to	08785958	0
09071690	_has_part	09074431	1
01883920	_has_part	01086945	0
02635013	_member_meronym	02635154	1
02068206	_hypernym	01915365	0
09117351	_member_of_domain_region	01294127	1
01449586	_synset_domain_topic_of	08790953	0
02416104	_hypernym	02414578	1
13623054	_member_of_domain_usage	10641223	0
15147850	_has_part	15146004	1
09219078	_member_meronym	04178329	0
02456962	_hypernym	02453611	1
09717047	_derivationally_related_form	03325769	0
13023292	_member_meronym	13024012	1
09142674	_has_part	02650928	0
02470451	_member_meronym	02483915	1
04603872	_also_see	02888000	0
02601589	_member_meronym	02601767	1
02967626	_similar_to	02601921	0
09150448	_instance_hypernym	08672738	1
03869222	_instance_hypernym	14607521	0
06845599	_member_of_domain_usage	03748456	1
06195698	_similar_to	02503313	0
03599761	_derivationally_related_form	02461063	1
09719430	_member_of_domain_usage	01474283	0
02623170	_member_meronym	02623868	1
09731906	_member_of_domain_region	01446760	0
08894456	_has_part	09430771	1
07618871	_also_see	04728376	0
09416076	_hypernym	00019128	1
09084196	_member_of_domain_usage	13003254	0
00963283	_derivationally_related_form	04879658	1
13875185	_member_meronym	04018399	0
02131418	_member_meronym	02133902	1
03922412	_member_of_domain_usage	09084196	0
02509197	_hypernym	02507649	1
04229107	_member_of_domain_usage	00233614	0
01448291	_hypernym	01446589	1
00201058	_has_part	09717047	0
14894140	_derivationally_related_form	02192383	1
03324928	_verb_group	00651954	0
06295235	_member_of_domain_usage	03443912	1
02650928	_also_see	08122141	0
09139380	_instance_hypernym	08665504	1
03098140	_instance_hypernym	02366825	0
02602405	_hypernym	02552171	1
03186005	_member_meronym	02608004	0
03457686	_hypernym	03461385	1
03093574	_instance_hypernym	08012765	0
02484975	_hypernym	02484473	1
01453330	_member_of_domain_region	02377480	0
02449921	_member_meronym	02450034	1
01646528	_member_meronym	07380144	0
13024967	_member_meronym	13025647	1
07623933	_derivationally_related_form	08790953	0
06845599	_member_of_domain_usage	14753808	1
10641223	_derivationally_related_form	09877443	0
02112891	_similar_to	02111684	1
09076982	_similar_to	02586865	0
00624263	_derivationally_related_form	06372095	1
07667326	_instance_hypernym	01277288	0
01642671	_member_meronym	01643092	1
09066948	_member_of_domain_usage	08851034	0
13052931	_hypernym	13049953	1
09076982	_has_part	03251766	0
08953151	_has_part	08953324	1
13875185	_member_of_domain_usage	00627437	0
02797021	_derivationally_related_form	06593803	1
04648207	_instance_hypernym	09242037	0
00902932	_derivationally_related_form	06630627	1
09194357	_member_of_domain_usage	12975608	0
09886807	_hypernym	09700492	1
07775905	_synset_domain_topic_of	13875185	0
02548689	_hypernym	02552171	1
02411427	_has_part	09242037	0
13516176	_derivationally_related_form	00210738	1
01319874	_hypernym	13076181	0
07803408	_hypernym	07803545	1
09458791	_synset_domain_topic_of	10208189	0
02400139	_member_meronym	02423787	1
02137549	_also_see	03198951	0
06845599	_member_of_domain_usage	03818843	1
15155891	_hypernym	15071684	0
08860123	_member_of_domain_region	08547300	1
01128071	_member_of_domain_region	02457408	0
02064154	_member_meronym	02064608	1
02398854	_member_of_domain_usage	04418644	0
08174398	_member_meronym	09044862	1
04760771	_instance_hypernym	02659808	0
02007417	_derivationally_related_form	00281132	1
03918297	_member_of_domain_usage	10550090	0
02465414	_derivationally_related_form	01186428	1
04418644	_similar_to	09064594	0
08999482	_member_of_domain_region	09327077	1
09064594	_synset_domain_topic_of	13040303	0
08860123	_member_of_domain_region	13752172	1
09194357	_also_see	01268112	0
02396427	_hypernym	02395003	1
09343422	_similar_to	01126846	0
02395244	_member_meronym	02396427	1
03093574	_derivationally_related_form	02751782	0
01552956	_member_meronym	01553142	1
02934168	_hypernym	01446760	0
04112752	_derivationally_related_form	00103317	1
08797254	_synset_domain_topic_of	02535909	0
08014860	_instance_hypernym	08392137	1
12048772	_member_meronym	02354621	0
02011810	_derivationally_related_form	01778568	1
09053019	_derivationally_related_form	14752057	0
06960298	_derivationally_related_form	02957823	1
08935212	_synset_domain_topic_of	01290435	0
02658944	_member_meronym	02659176	1
02369012	_member_of_domain_usage	09472597	0
00853633	_derivationally_related_form	00431005	1
01454856	_instance_hypernym	08851034	0
13010219	_hypernym	11590783	1
08404895	_member_of_domain_region	03909835	0
12060546	_hypernym	12041446	1
02338592	_member_meronym	03324928	0
02329093	_member_meronym	02329401	1
02281485	_synset_domain_topic_of	01889520	0
02535909	_member_meronym	02536864	1
09397391	_synset_domain_topic_of	02652979	0
02354950	_member_meronym	02355711	1
12979129	_member_of_domain_region	08726463	0
02400139	_member_meronym	02407959	1
02133902	_instance_hypernym	13076181	0
10082146	_derivationally_related_form	00991838	1
02471467	_derivationally_related_form	09070487	0
08723006	_member_of_domain_region	05915584	1
15159819	_verb_group	01645278	0
09721244	_derivationally_related_form	08961402	1
09089782	_member_of_domain_region	13010219	0
06295235	_member_of_domain_usage	07140348	1
01547001	_synset_domain_topic_of	10659393	0
02660769	_member_meronym	02661765	1
02415577	_synset_domain_topic_of	08800676	0
02366702	_member_meronym	02366825	1
10215623	_instance_hypernym	00088713	0
01244593	_derivationally_related_form	00038365	1
08570758	_hypernym	03909835	0
09095023	_has_part	09095751	1
02658531	_hypernym	06880664	0
04051825	_derivationally_related_form	01130607	1
12963140	_member_meronym	00252710	0
02672859	_derivationally_related_form	13529616	1
02354621	_has_part	10550090	0
14883206	_derivationally_related_form	00443670	1
02534734	_member_of_domain_region	06195698	0
09095751	_has_part	03009477	1
09114696	_verb_group	09692624	0
00902932	_hypernym	00897241	1
09192973	_member_meronym	03922412	0
12998349	_member_meronym	13016457	1
01454856	_synset_domain_topic_of	08549480	0
03568653	_hypernym	03828465	1
02571486	_also_see	02535909	0
08723006	_has_part	09327881	1
13752911	_member_of_domain_region	00201058	0
09051235	_has_part	09075842	1
09292751	_member_of_domain_usage	03970363	0
08860123	_member_of_domain_region	08555333	1
01015996	_also_see	03966976	0
00159899	_derivationally_related_form	00880227	1
07703889	_member_meronym	03970363	0
12963796	_member_meronym	12965209	1
02535909	_derivationally_related_form	07927197	0
01604251	_derivationally_related_form	00299680	1
01465713	_similar_to	09458791	0
13011856	_member_meronym	13012030	1
08082236	_instance_hypernym	08726463	0
02716866	_hypernym	02716205	1
09717047	_similar_to	08504594	0
08766988	_has_part	08775784	1
10641223	_instance_hypernym	09678009	0
00491689	_derivationally_related_form	09440186	1
10460033	_also_see	01268112	0
09095023	_has_part	09306031	1
09717047	_member_of_domain_region	02503313	0
01471070	_member_meronym	01626134	1
09157163	_member_meronym	12963140	0
00897241	_derivationally_related_form	06630017	1
02447896	_member_meronym	15071684	0
12979630	_hypernym	11592146	1
09093472	_instance_hypernym	04577293	0
01542207	_verb_group	01541579	1
00356367	_has_part	02457408	0
01503061	_has_part	01896031	1
15159819	_derivationally_related_form	02682424	0
02640857	_hypernym	02640242	1
02174461	_derivationally_related_form	02499434	0
14487731	_derivationally_related_form	00493259	1
00233614	_also_see	01282466	0
02074915	_member_meronym	02083038	1
14487731	_derivationally_related_form	02367993	0
01645278	_hypernym	01626600	1
08800676	_member_of_domain_region	08726463	0
13065215	_member_meronym	13065514	1
08012765	_similar_to	09066948	0
00230172	_derivationally_related_form	02156546	1
01439121	_synset_domain_topic_of	02653497	0
08801678	_has_part	08804962	1
01646528	_member_meronym	09273447	0
02534734	_has_part	07795751	1
10485440	_also_see	10460033	0
02117900	_hypernym	02117135	1
06310945	_verb_group	13048666	0
04412727	_hypernym	02720201	1
09157163	_synset_domain_topic_of	03909835	0
00853633	_derivationally_related_form	10221312	1
04603872	_member_meronym	07703889	0
01015996	_derivationally_related_form	10366779	1
03198951	_hypernym	10485440	0
02648313	_hypernym	02647660	1
01324799	_member_of_domain_region	01646528	0
14996020	_derivationally_related_form	01245637	1
04993882	_verb_group	02398854	0
04879658	_derivationally_related_form	00963283	1
09089782	_member_of_domain_usage	12977296	0
09075842	_has_part	09076675	1
09452395	_has_part	01883920	0
02641825	_member_meronym	02646377	1
02659808	_member_of_domain_region	13752911	0
15155220	_has_part	15165490	1
10224098	_has_part	10208189	0
14599641	_derivationally_related_form	00264875	1
14752057	_member_of_domain_usage	09313716	0
10338094	_derivationally_related_form	02390101	1
02174461	_derivationally_related_form	00651954	0
02551824	_member_meronym	02552171	1
10550090	_member_of_domain_usage	02354621	0
06845599	_member_of_domain_usage	04407007	1
04603872	_instance_hypernym	09082540	0
01299735	_has_part	01295918	1
08851034	_instance_hypernym	02456147	0
01647803	_member_meronym	01648001	1
14705533	_has_part	14487731	0
08860123	_member_of_domain_region	04314522	1
10209731	_verb_group	09351647	0
08766988	_member_of_domain_region	09222742	1
00089657	_instance_hypernym	13533470	0
02136271	_derivationally_related_form	04069276	1
02133902	_synset_domain_topic_of	02540670	0
04010348	_hypernym	02720725	1
01884348	_instance_hypernym	04242704	0
08860123	_member_of_domain_region	08504851	1
09131428	_instance_hypernym	03324928	0
02379753	_derivationally_related_form	00212205	1
07618871	_member_meronym	02447896	0
04733204	_derivationally_related_form	02262542	1
01543731	_member_of_domain_usage	02366825	0
13060689	_member_meronym	13060912	1
02682424	_also_see	02102605	0
04473432	_derivationally_related_form	01953810	1
02952109	_hypernym	03869222	0
07229747	_hypernym	07229530	1
04728376	_instance_hypernym	04648207	0
08780881	_has_part	08783286	1
02652132	_instance_hypernym	01883920	0
14686913	_derivationally_related_form	00442267	1
07775905	_also_see	00088713	0
13054211	_member_meronym	13055009	1
03325769	_also_see	09131428	0
12039743	_member_meronym	12045352	1
01645093	_verb_group	03198951	0
01915131	_derivationally_related_form	02898711	1
13010219	_member_meronym	10641223	0
08305942	_hypernym	08168978	1
10460033	_derivationally_related_form	04441282	0
08860123	_member_of_domain_region	03702719	1
09807754	_instance_hypernym	07803992	0
07673397	_hypernym	07672135	1
02595339	_member_of_domain_usage	09134999	0
03519578	_hypernym	03519981	1
10595361	_member_meronym	01084180	0
01640383	_member_meronym	01640567	1
10382825	_derivationally_related_form	06310945	0
02641608	_member_meronym	02651846	1
09268927	_member_meronym	10595361	0
01465994	_member_meronym	01467986	1
00233614	_synset_domain_topic_of	02629410	0
03467517	_hypernym	04338517	1
13950812	_derivationally_related_form	09356080	0
13030852	_hypernym	13028611	1
14411243	_similar_to	02346627	0
02412440	_derivationally_related_form	00058265	1
12978381	_member_meronym	03324928	0
08174398	_member_meronym	08780881	1
09478355	_synset_domain_topic_of	12058822	0
02854739	_hypernym	04508489	1
03976268	_instance_hypernym	13950812	0
02389346	_verb_group	02389592	1
04438742	_verb_group	02457408	0
14807929	_hypernym	05407119	1
02952109	_verb_group	08800676	0
12985236	_hypernym	11592146	1
01645093	_hypernym	01442591	0
14859622	_hypernym	14961512	1
14607521	_similar_to	08764561	0
02505809	_member_meronym	02505998	1
09192973	_synset_domain_topic_of	04947628	0
06871384	_derivationally_related_form	01050896	1
02343187	_derivationally_related_form	01290435	0
13016457	_member_meronym	13232515	1
07678193	_derivationally_related_form	09692624	0
02659808	_hypernym	02658079	1
02477890	_also_see	12979129	0
09070793	_has_part	02956500	1
10224098	_also_see	01465713	0
00432839	_derivationally_related_form	14489113	1
01915365	_derivationally_related_form	12979129	0
09368224	_derivationally_related_form	08641113	1
00513401	_verb_group	01873310	0
00680485	_derivationally_related_form	06211078	1
09219078	_member_meronym	02558350	0
02340186	_hypernym	02339922	1
09452395	_synset_domain_topic_of	04535524	0
02175958	_derivationally_related_form	04989657	1
02601921	_member_meronym	02595569	0
00086835	_derivationally_related_form	00824054	1
09058071	_member_of_domain_region	13623054	0
13000372	_member_meronym	13005568	1
03909835	_member_of_domain_region	10595361	0
09117351	_has_part	09192973	1
09772746	_member_of_domain_region	02137549	0
09761068	_derivationally_related_form	02470685	1
01285305	_hypernym	02338592	0
02399000	_hypernym	02394477	1
02751782	_member_of_domain_region	08012765	0
13753585	_hypernym	13745420	1
02586865	_similar_to	09343422	0
10621514	_derivationally_related_form	00849294	1
02580991	_verb_group	03976268	0
09095023	_member_of_domain_region	01283935	1
02580991	_instance_hypernym	04178329	0
08860123	_member_of_domain_region	09351547	1
14672224	_synset_domain_topic_of	01890860	0
00772813	_derivationally_related_form	00963283	1
09313716	_synset_domain_topic_of	01889520	0
09284015	_derivationally_related_form	01567888	1
00918471	_instance_hypernym	02377480	0
02071294	_hypernym	02068974	1
09076982	_derivationally_related_form	14705533	0
07622261	_derivationally_related_form	01265740	1
09058071	_has_part	01126846	0
08095647	_member_meronym	08096474	1
14752057	_member_of_domain_region	01294791	0
00410406	_derivationally_related_form	09738708	1
03251766	_member_of_domain_usage	02356381	0
02549533	_member_meronym	02549796	1
01442591	_member_of_domain_region	03922412	0
06845599	_member_of_domain_usage	14753414	1
02338592	_also_see	02499434	0
06695862	_derivationally_related_form	00880227	1
07803992	_hypernym	09155986	0
00883635	_hypernym	00883226	1
09736633	_member_of_domain_usage	08935212	0
02649218	_hypernym	02648625	1
14752057	_verb_group	07649463	0
01645634	_hypernym	01626134	1
09084196	_verb_group	03098140	0
14836468	_hypernym	14732946	1
00356367	_hypernym	02595702	0
09709001	_hypernym	09708405	1
02354621	_hypernym	04221994	0
08554440	_hypernym	08553535	1
07635155	_has_part	10595361	0
13077033	_hypernym	12992868	1
06310945	_has_part	01304121	0
13043516	_hypernym	11590783	1
07851054	_derivationally_related_form	01543731	0
13575433	_derivationally_related_form	00458754	1
06366581	_member_meronym	09192973	0
01398941	_derivationally_related_form	04049405	1
02513742	_similar_to	13042814	0
02528534	_member_meronym	02541431	1
03222959	_hypernym	12975608	0
08801678	_member_of_domain_region	06964247	1
00201058	_hypernym	00019128	0
08368308	_derivationally_related_form	02875499	1
09478355	_synset_domain_topic_of	04221994	0
02425086	_hypernym	02419796	1
08256968	_hypernym	09100982	0
01640383	_member_meronym	01640846	1
04760771	_hypernym	02355477	0
08563627	_has_part	09057311	1
13042814	_also_see	01821634	0
08801099	_member_meronym	09696124	1
08804487	_also_see	09397391	0
01190840	_derivationally_related_form	07891726	1
09234104	_member_of_domain_region	13040303	0
09301249	_instance_hypernym	09241247	1
02601921	_instance_hypernym	03151500	0
01883212	_member_meronym	01883513	1
00431005	_member_meronym	02661317	0
09071690	_has_part	09378014	1
06369829	_member_of_domain_usage	13030438	0
08342039	_hypernym	08339454	1
02582591	_member_meronym	09702134	0
04353016	_hypernym	04352070	1
02062991	_has_part	01480880	0
13070003	_hypernym	11590783	1
02652979	_instance_hypernym	01457082	0
02607630	_member_meronym	02609466	1
02608004	_member_meronym	01449586	0
13039870	_member_meronym	13040108	1
09142674	_instance_hypernym	05638778	0
02535349	_member_meronym	02535537	1
07667326	_similar_to	08214272	0
00105778	_derivationally_related_form	09930876	1
08570758	_member_meronym	08782976	0
09682803	_derivationally_related_form	08095647	1
13040303	_verb_group	02682424	0
01890860	_hypernym	01889520	1
09157021	_synset_domain_topic_of	04577293	0
02936020	_derivationally_related_form	06321702	1
01128071	_derivationally_related_form	07450549	0
15169248	_hypernym	15228378	1
05959954	_has_part	07803408	0
03933529	_derivationally_related_form	02331175	1
06369829	_hypernym	05638778	0
10272171	_hypernym	09886010	1
06776783	_hypernym	13030852	0
14599168	_hypernym	14739360	1
08790953	_also_see	01883920	0
13060451	_member_meronym	13062112	1
09058071	_member_of_domain_usage	06767777	0
00252710	_derivationally_related_form	15147850	1
02530421	_has_part	10659393	0
02521241	_member_meronym	02525543	1
03663433	_member_of_domain_region	07775905	0
10146927	_derivationally_related_form	00899597	1
02659808	_synset_domain_topic_of	10412910	0
05951969	_derivationally_related_form	10306279	1
09458791	_hypernym	13005329	0
03315644	_derivationally_related_form	01271189	1
03325769	_synset_domain_topic_of	10412910	0
02435853	_hypernym	02399000	1
02338592	_has_part	01285305	0
06845599	_member_of_domain_usage	03295357	1
03324928	_hypernym	01277755	0
04764741	_derivationally_related_form	00485711	1
03021531	_member_of_domain_usage	06369829	0
08723006	_member_of_domain_region	08321469	1
09219078	_member_of_domain_usage	10595361	0
09052314	_instance_hypernym	09044862	1
02650928	_verb_group	04955160	0
12083339	_member_meronym	12083591	1
07851054	_derivationally_related_form	01128071	0
09060768	_has_part	09358096	1
03074922	_verb_group	13076181	0
09044862	_has_part	09067277	1
01480880	_member_of_domain_region	09142674	0
06214744	_derivationally_related_form	00408852	1
01465713	_derivationally_related_form	03251766	0
13037124	_hypernym	11592146	1
12978381	_has_part	10102369	0
00713250	_derivationally_related_form	01266895	1
02582591	_hypernym	02896789	0
06845599	_member_of_domain_usage	14747168	1
13064678	_also_see	02458135	0
08801678	_member_of_domain_region	08541609	1
02682424	_similar_to	04221994	0
13298935	_hypernym	13298701	1
09356639	_also_see	09131428	0
02409202	_hypernym	02407959	1
13040303	_verb_group	02369012	0
08860123	_member_of_domain_region	06699225	1
02629410	_also_see	07623933	0
00105778	_derivationally_related_form	00427580	1
08785958	_has_part	15183802	0
07858595	_derivationally_related_form	02195470	1
13623054	_member_of_domain_region	12977296	0
13015229	_hypernym	11592146	1
08936303	_instance_hypernym	13042814	0
08174398	_member_meronym	09039411	1
10472799	_derivationally_related_form	01474283	0
00419137	_derivationally_related_form	07443210	1
03186005	_similar_to	10489944	0
06845599	_member_of_domain_usage	03155334	1
01821634	_instance_hypernym	12977296	0
05716744	_derivationally_related_form	02196690	1
05949937	_hypernym	09807754	0
02420789	_derivationally_related_form	00719705	1
09268927	_has_part	00918471	0
01468238	_hypernym	01466257	1
03519981	_member_of_domain_usage	09157163	0
00575970	_derivationally_related_form	15055633	1
02553196	_member_meronym	02456147	0
09232165	_instance_hypernym	09475292	1
02411427	_member_meronym	09458791	0
08124971	_has_part	08125722	1
03757925	_also_see	00252710	0
12998349	_member_meronym	13074084	1
13048666	_member_meronym	01128071	0
08641113	_derivationally_related_form	10352299	1
09397391	_member_meronym	02102605	0
06201908	_derivationally_related_form	00680346	1
06767777	_member_meronym	01294791	0
00880227	_derivationally_related_form	06695579	1
01480880	_also_see	04955160	0
08984788	_has_part	09453566	1
01319874	_member_meronym	01320513	0
06845599	_member_of_domain_usage	04006953	1
08396537	_has_part	02509694	0
02066707	_hypernym	02062744	1
09093472	_member_of_domain_region	04577293	0
08929922	_member_of_domain_region	13753274	1
01319874	_synset_domain_topic_of	13030852	0
01126846	_hypernym	01127411	1
03222959	_instance_hypernym	02652979	0
06413889	_derivationally_related_form	07009946	1
10160624	_instance_hypernym	07667326	0
12968408	_member_meronym	12970379	1
09292751	_derivationally_related_form	09131428	0
09127461	_instance_hypernym	09399592	1
08764561	_member_of_domain_region	00088713	0
00883226	_derivationally_related_form	07230089	1
01889520	_member_of_domain_usage	02411427	0
00135285	_derivationally_related_form	06372095	1
10215623	_synset_domain_topic_of	08800676	0
10490421	_hypernym	09841188	1
09058071	_member_of_domain_region	09242037	0
04051068	_hypernym	02673637	1
09058071	_derivationally_related_form	03922412	0
02340930	_hypernym	02339376	1
08256968	_derivationally_related_form	08504594	0
08929922	_member_of_domain_region	06964901	1
09234104	_derivationally_related_form	09273447	0
02593863	_member_meronym	02596888	1
01319874	_member_of_domain_usage	09114696	0
06845599	_member_of_domain_usage	04476633	1
01635343	_member_of_domain_region	02888000	0
09119277	_has_part	04604009	1
04178329	_member_of_domain_usage	09719430	0
08674970	_derivationally_related_form	02468965	1
13005329	_member_meronym	02534734	0
00105554	_derivationally_related_form	00431005	1
02281485	_synset_domain_topic_of	09945603	0
09038990	_has_part	09719430	1
10472799	_hypernym	03186005	0
09243405	_instance_hypernym	09215664	1
09157163	_derivationally_related_form	03352961	0
15159583	_derivationally_related_form	00734927	1
08214272	_verb_group	02580991	0
02633677	_hypernym	02632989	1
10641223	_similar_to	02137549	0
00485711	_derivationally_related_form	04764741	1
04221994	_verb_group	02632239	0
01896031	_has_part	01897991	1
09082540	_similar_to	09070487	0
01696135	_derivationally_related_form	04694809	1
02751782	_similar_to	02366825	0
03670622	_hypernym	02716866	1
00585810	_verb_group	08726463	0
09087599	_has_part	09368479	1
04018399	_verb_group	04419315	0
08149781	_hypernym	08081668	1
09082540	_instance_hypernym	07703889	0
09260466	_hypernym	09416076	1
01282466	_instance_hypernym	08570758	0
13024763	_member_meronym	13024967	1
09351647	_verb_group	10489944	0
02534352	_member_meronym	02535349	1
03922412	_synset_domain_topic_of	01442591	0
01891438	_member_meronym	01891633	1
02967626	_instance_hypernym	02595339	0
03612814	_hypernym	03990474	1
10485440	_has_part	02102605	0
09044862	_has_part	09111366	1
13950812	_has_part	10160624	0
03662016	_hypernym	03681148	1
04221994	_has_part	02630052	0
02396796	_hypernym	02395003	1
02595339	_derivationally_related_form	02575325	0
09082540	_has_part	09084483	1
01645278	_instance_hypernym	12979129	0
10318892	_derivationally_related_form	01743531	1
00201058	_instance_hypernym	03093184	0
12978969	_hypernym	11590783	1
01449586	_verb_group	09692624	0
06845599	_member_of_domain_usage	04443588	1
09157163	_has_part	02720725	0
02989475	_hypernym	02996840	1
13005329	_member_meronym	04760771	0
06344461	_hypernym	06343971	1
10595361	_similar_to	09219078	0
01874928	_hypernym	01874434	1
02595702	_similar_to	02509197	0
15228378	_hypernym	15129927	1
13533470	_member_of_domain_region	03098140	0
10352299	_derivationally_related_form	08641113	1
03869222	_synset_domain_topic_of	01884348	0
02068735	_member_meronym	02069569	1
10224098	_has_part	02645304	0
02324045	_has_part	02158739	1
01449586	_instance_hypernym	09351647	0
02356108	_member_meronym	02355477	1
06369829	_member_meronym	00089657	0
03362393	_hypernym	02715941	1
09458791	_member_meronym	01285305	0
05681117	_has_part	05768553	1
15159819	_instance_hypernym	01645278	0
07427337	_derivationally_related_form	00223500	1
10382825	_also_see	09194357	0
10582154	_derivationally_related_form	02540670	1
02582591	_verb_group	02896789	0
09078231	_member_of_domain_region	02581957	1
00513401	_hypernym	06349220	0
02507337	_member_meronym	02509694	1
02356381	_similar_to	01126846	0
10268299	_derivationally_related_form	02614387	1
00374668	_derivationally_related_form	02540670	0
07443210	_derivationally_related_form	00441212	1
09273447	_has_part	00918471	0
08780881	_member_of_domain_region	09542697	1
04438742	_member_meronym	15183802	0
02015168	_derivationally_related_form	00057306	1
07678193	_member_meronym	02658531	0
09039411	_member_of_domain_region	06340047	1
02133902	_member_meronym	02580991	0
02430191	_derivationally_related_form	01081456	1
08214272	_instance_hypernym	01449586	0
06845599	_member_of_domain_usage	03588668	1
00088713	_also_see	15159819	0
06295235	_member_of_domain_usage	09212572	1
13030438	_member_of_domain_usage	14752057	0
02335349	_member_meronym	02338029	1
02952109	_has_part	13040303	0
13007770	_hypernym	11592146	1
02136285	_hypernym	09736633	0
07679356	_derivationally_related_form	01337653	1
00374668	_also_see	02458135	0
02331309	_hypernym	02331046	1
06310945	_instance_hypernym	10659393	0
00680346	_hypernym	00680145	1
01928390	_similar_to	02989685	0
08986066	_instance_hypernym	08691669	1
01884348	_hypernym	02652979	0
11517494	_derivationally_related_form	00073584	1
02586865	_member_of_domain_region	02503313	0
09067277	_has_part	09373716	1
10215623	_member_of_domain_region	08764561	0
00842692	_derivationally_related_form	01186428	1
02355477	_member_meronym	14705533	0
00492677	_derivationally_related_form	08615374	1
01645093	_has_part	06883073	0
13005329	_hypernym	12998815	1
02720725	_also_see	13064678	0
07653394	_hypernym	07649854	1
02503313	_also_see	00431005	0
10382825	_derivationally_related_form	03854065	1
01164874	_member_of_domain_usage	08549480	0
02652668	_hypernym	02552171	1
01645093	_derivationally_related_form	13533470	0
00088725	_derivationally_related_form	01215137	1
02630468	_member_of_domain_region	12967281	0
02453890	_member_meronym	02456776	1
02589955	_similar_to	03586631	0
09400667	_instance_hypernym	09440186	1
03324928	_synset_domain_topic_of	13005329	0
01158572	_derivationally_related_form	13451804	1
02477890	_hypernym	04221994	0
07779747	_hypernym	07775905	1
00855295	_member_of_domain_region	02377480	0
01653026	_hypernym	01639765	1
09122968	_member_of_domain_region	01645278	0
02358091	_hypernym	02355227	1
02471467	_member_of_domain_region	01465713	0
04947628	_hypernym	04947186	1
01465713	_synset_domain_topic_of	09458791	0
09075842	_has_part	09378014	1
03198951	_synset_domain_topic_of	10489944	0
08860123	_member_of_domain_region	07450343	1
09313716	_also_see	01304121	0
00040188	_derivationally_related_form	00256961	1
04535524	_member_of_domain_usage	10595361	0
02411705	_has_part	02439568	1
01873310	_similar_to	02352390	0
09044862	_has_part	09059274	1
02369012	_derivationally_related_form	09234104	0
00991838	_derivationally_related_form	14864360	1
09242037	_member_meronym	02073041	0
02510455	_hypernym	02507649	1
02343772	_member_meronym	01453330	0
02546075	_derivationally_related_form	10183757	1
04221994	_instance_hypernym	02630468	0
02553196	_member_meronym	02621721	1
10489944	_synset_domain_topic_of	01890860	0
00191517	_derivationally_related_form	13496771	1
10550090	_also_see	00585810	0
02400139	_member_meronym	02409702	1
00585810	_hypernym	03654086	0
14841267	_derivationally_related_form	02112891	1
04473432	_member_meronym	02967626	0
01167981	_derivationally_related_form	08253815	1
09194357	_also_see	02102605	0
00492677	_derivationally_related_form	04764741	1
14705533	_member_of_domain_usage	01465713	0
02341475	_hypernym	02339376	1
04018399	_derivationally_related_form	01453330	0
10162354	_derivationally_related_form	03497657	1
02485451	_member_meronym	10595361	0
02130308	_hypernym	02127808	1
10102369	_derivationally_related_form	02367993	0
01141938	_derivationally_related_form	02062744	1
09201301	_also_see	03757925	0
07590611	_hypernym	07588947	1
09157163	_member_meronym	10311661	0
02380009	_derivationally_related_form	10525617	1
09082540	_also_see	07066459	0
01888520	_member_meronym	01893535	1
07667326	_synset_domain_topic_of	00374668	0
01560369	_derivationally_related_form	00360242	1
12084746	_member_meronym	03222959	0
01648494	_member_meronym	01648620	1
13623054	_also_see	08396537	0
09194357	_has_part	09357847	1
02073041	_synset_domain_topic_of	02356381	0
12967776	_hypernym	11590783	1
06195698	_instance_hypernym	09111168	0
08932568	_has_part	08933621	1
04497962	_hypernym	03324928	0
01445027	_derivationally_related_form	14757547	1
02343187	_derivationally_related_form	03922412	0
02457756	_member_meronym	02457945	1
02456147	_synset_domain_topic_of	01454856	0
13660178	_derivationally_related_form	00491689	1
06369829	_instance_hypernym	04947628	0
01130607	_derivationally_related_form	04051825	1
00223854	_synset_domain_topic_of	01084180	0
06845599	_member_of_domain_usage	15071684	1
00019128	_verb_group	10102369	0
02602212	_derivationally_related_form	07515974	1
09313716	_derivationally_related_form	07927197	0
03497657	_has_part	02902079	1
02503313	_hypernym	01274909	0
09103943	_has_part	09459557	1
04221994	_similar_to	02682424	0
00161739	_derivationally_related_form	01696648	1
06349220	_member_meronym	02582591	0
08133189	_hypernym	08337324	1
02888000	_member_meronym	07703889	0
00799537	_derivationally_related_form	02414473	1
10160624	_hypernym	01876180	0
13205482	_member_meronym	13210006	1
12979129	_also_see	04221994	0
08860123	_member_of_domain_region	04441528	1
02447896	_hypernym	10102369	0
09109444	_has_part	09109882	1
01928390	_verb_group	13064678	0
01305361	_hypernym	02085742	1
01465713	_has_part	09343422	0
02336011	_hypernym	02329401	1
01439121	_member_of_domain_region	01885367	0
03970363	_hypernym	02896442	1
04438742	_derivationally_related_form	06883073	0
03061081	_derivationally_related_form	05996646	1
02629410	_member_meronym	04473432	0
13486270	_derivationally_related_form	00442267	1
03198951	_synset_domain_topic_of	12977296	0
01382818	_derivationally_related_form	01639765	1
09134999	_derivationally_related_form	08790953	0
02673480	_hypernym	02832168	1
02355477	_synset_domain_topic_of	10224098	0
08860123	_member_of_domain_region	07635155	1
02343772	_member_meronym	12048772	0
13006377	_hypernym	11592146	1
01645093	_member_of_domain_region	08936303	0
01075117	_hypernym	00954086	1
09292751	_instance_hypernym	02073041	0
02784732	_derivationally_related_form	01273263	1
08800676	_derivationally_related_form	09064594	0
06295235	_member_of_domain_usage	03885028	1
09134999	_similar_to	02658531	0
00089154	_derivationally_related_form	14283632	1
02580991	_has_part	02989685	0
02907985	_instance_hypernym	04511002	1
05638778	_member_of_domain_usage	13533470	0
15058163	_hypernym	15057744	1
04107984	_synset_domain_topic_of	09110229	0
08910668	_has_part	09237404	1
03251766	_member_of_domain_usage	00513401	0
14276936	_hypernym	14070360	1
01928390	_has_part	03519981	0
08214470	_hypernym	08190754	1
07842753	_derivationally_related_form	14752057	0
13038944	_member_meronym	13046285	1
03663433	_similar_to	02343772	0
00366858	_derivationally_related_form	15055633	1
01285305	_hypernym	05959954	0
08860123	_member_of_domain_region	13359941	1
02652132	_also_see	00233614	0
02652979	_member_meronym	02653359	1
02136285	_instance_hypernym	04441282	0
13029946	_member_meronym	13030157	1
04497962	_derivationally_related_form	02352390	0
09114696	_has_part	09418484	1
14411243	_has_part	14752057	0
03914919	_derivationally_related_form	01543731	1
01480880	_member_of_domain_region	01453188	0
09109444	_has_part	09441725	1
00651954	_derivationally_related_form	10208189	0
05410646	_hypernym	05407119	1
02509694	_has_part	09313716	0
13063269	_hypernym	12992868	1
00052146	_has_part	09089782	0
03928814	_hypernym	03614007	1
00459114	_member_of_domain_usage	12975608	0
02483915	_member_meronym	02484473	1
02073041	_instance_hypernym	04728376	0
02068206	_hypernym	02066707	1
09313716	_member_of_domain_region	14705533	0
02654425	_hypernym	02652668	1
14299336	_hypernym	13875185	0
06845599	_member_of_domain_usage	03554131	1
07803992	_derivationally_related_form	00842692	0
00483656	_derivationally_related_form	06863751	1
08095647	_hypernym	09091398	0
13063046	_hypernym	11594676	1
02589955	_instance_hypernym	13623054	0
00604617	_derivationally_related_form	04718563	1
09719430	_synset_domain_topic_of	02558350	0
06295235	_member_of_domain_usage	04323819	1
02580991	_also_see	13950812	0
01144550	_derivationally_related_form	02443484	1
02102605	_derivationally_related_form	03918297	0
09049599	_has_part	09103943	1
09731906	_derivationally_related_form	02580991	0
13003522	_hypernym	12998815	1
04535524	_member_of_domain_usage	02601921	0
14974264	_derivationally_related_form	01268457	1
02411427	_hypernym	10224098	0
08860123	_member_of_domain_region	07889814	1
02338592	_synset_domain_topic_of	15071684	0
02355477	_hypernym	02355227	1
02595702	_instance_hypernym	09142674	0
09060768	_has_part	09326467	1
02457408	_also_see	02509694	0
06510977	_derivationally_related_form	02896789	1
03222959	_synset_domain_topic_of	04441282	0
04248851	_derivationally_related_form	01480770	1
03757925	_synset_domain_topic_of	02580991	0
01758308	_derivationally_related_form	01173813	1
12048772	_verb_group	04221994	0
14705718	_derivationally_related_form	01354006	1
08797254	_derivationally_related_form	04728376	0
09044862	_member_of_domain_region	08303692	1
00459114	_also_see	09472597	0
12992464	_member_meronym	11592146	1
13030852	_also_see	09134999	0
03747746	_hypernym	03771443	1
07703889	_member_meronym	09157021	0
13031956	_hypernym	11592146	1
07803408	_synset_domain_topic_of	02503313	0
01320513	_derivationally_related_form	10587227	1
08936303	_hypernym	08012765	0
02485451	_derivationally_related_form	01164874	1
13064678	_also_see	12963140	0
01193099	_derivationally_related_form	00840630	1
15155891	_member_meronym	02352390	0
13210006	_hypernym	13167078	1
07618871	_similar_to	04648207	0
03550533	_hypernym	02718469	1
09332976	_member_meronym	05638778	0
02590237	_member_meronym	02592244	1
01453330	_has_part	02653497	0
02373093	_member_meronym	02373601	1
02582591	_synset_domain_topic_of	02174461	0
12982103	_hypernym	11590783	1
09273447	_also_see	08764561	0
04353410	_hypernym	03828465	1
08505573	_also_see	02650928	0
02072355	_member_meronym	02072493	1
02660769	_member_of_domain_region	08800676	0
09711132	_hypernym	09710164	1
03869222	_instance_hypernym	09478355	0
01290435	_instance_hypernym	01075117	1
02601921	_verb_group	13030852	0
09250165	_instance_hypernym	09453008	1
03918297	_hypernym	14607521	0
02156063	_derivationally_related_form	13773361	1
00356367	_member_meronym	02457408	0
09114696	_has_part	09228619	1
07703889	_hypernym	02367993	0
01284444	_instance_hypernym	00223983	1
09356080	_member_of_domain_usage	09719430	0
09044862	_has_part	09089139	1
02658531	_also_see	01876180	0
02380980	_hypernym	01766952	1
01844859	_synset_domain_topic_of	02102605	0
02553196	_member_meronym	02618244	1
15183802	_synset_domain_topic_of	08785958	0
12996225	_member_meronym	13065902	1
04018399	_synset_domain_topic_of	01084180	0
06367373	_derivationally_related_form	01635176	1
02124623	_hypernym	01915365	0
13068434	_hypernym	13066129	1
04497962	_also_see	02338592	0
02325211	_member_meronym	02325366	1
08505573	_has_part	07851054	0
02554235	_derivationally_related_form	10663315	1
13040303	_has_part	02343772	0
02574651	_member_meronym	02574910	1
01320513	_member_of_domain_usage	08404895	0
06295235	_member_of_domain_usage	09269972	1
06767777	_similar_to	08787466	0
01546660	_member_meronym	01547459	1
10412910	_has_part	09292751	0
00288486	_derivationally_related_form	01928730	1
04107984	_derivationally_related_form	09693372	0
09048880	_has_part	09092497	1
02967626	_has_part	06880664	0
06295235	_member_of_domain_usage	01042764	1
03093574	_instance_hypernym	03586631	0
00719705	_derivationally_related_form	02461063	1
03151500	_member_of_domain_usage	01449586	0
02590910	_derivationally_related_form	10788852	1
08082236	_instance_hypernym	01645278	0
00964105	_instance_hypernym	00962129	1
00374668	_hypernym	01883920	0
09141526	_has_part	09388121	1
01884348	_member_of_domain_usage	08726463	0
10792335	_derivationally_related_form	01778017	1
02457408	_hypernym	02346627	0
02597367	_hypernym	02594250	1
04418644	_instance_hypernym	08804487	0
02346315	_member_meronym	02346823	1
09083390	_has_part	07927197	0
00201058	_derivationally_related_form	01972131	1
07667326	_member_of_domain_usage	03966976	0
09152944	_has_part	09153710	1
10460033	_has_part	07380144	0
02564403	_hypernym	02562315	1
01821634	_member_of_domain_usage	03922412	0
13030157	_member_meronym	13030438	1
09693372	_member_of_domain_usage	04955160	0
15165289	_has_part	15169136	1
02660769	_instance_hypernym	03962525	0
02133704	_hypernym	02131653	1
02934168	_member_of_domain_usage	13076181	0
09044862	_has_part	09075842	1
02503313	_also_see	07803408	0
00962722	_derivationally_related_form	02583780	1
02369012	_derivationally_related_form	04418644	0
02072159	_derivationally_related_form	00914343	1
08256968	_also_see	15155891	0
08932568	_has_part	08933940	1
02398463	_derivationally_related_form	03663433	0
10075529	_derivationally_related_form	06371413	1
08404895	_member_meronym	04178329	0
01883513	_hypernym	01874434	1
01915365	_verb_group	04419315	0
05010801	_derivationally_related_form	02675458	1
08012765	_also_see	09142674	0
01649948	_member_meronym	01650167	1
06369829	_synset_domain_topic_of	09144117	0
09138935	_has_part	09320985	1
01453330	_verb_group	09268927	0
09237076	_has_part	09405169	1
07678193	_synset_domain_topic_of	05949937	0
02688623	_derivationally_related_form	07802417	1
01889520	_derivationally_related_form	02535909	0
04236001	_derivationally_related_form	02701445	1
09772746	_member_of_domain_region	02415577	0
03200357	_hypernym	03895866	1
12084746	_hypernym	00088713	0
03718056	_hypernym	03214670	1
04107984	_synset_domain_topic_of	01294791	0
01644104	_hypernym	01626134	1
02989685	_also_see	02595569	0
09044862	_has_part	09078231	1
04242704	_member_meronym	02068206	0
00751389	_derivationally_related_form	00848466	1
09064594	_member_meronym	10485440	0
09219078	_instance_hypernym	09403734	1
10641223	_verb_group	02398854	0
02546744	_member_meronym	02546873	1
08250635	_also_see	02343187	0
05043973	_derivationally_related_form	02112029	1
00459114	_similar_to	01646528	0
01649948	_member_meronym	01652163	1
03970363	_has_part	09945603	0
09078231	_derivationally_related_form	02738760	1
10485440	_also_see	12979129	0
02989893	_hypernym	02996840	1
10641223	_instance_hypernym	02415577	0
08860123	_member_of_domain_usage	10548227	1
02751782	_synset_domain_topic_of	01304121	0
