# Supplementary material
Source: ML conference proceedings conference paper supplement (https://proceedings.neurips.cc/paper_files/paper/2021/hash/0fd600c953cde8121262e322ef09f70e-Abstract.html)
Supplement: Supplementary file 1 [file 0fd600c953cde8121262e322ef09f70e-Supplemental.zip › Supplementary_Material_Paper_8745/data/GraIL-BM_WN18RR_v3/test/test-random-sample/test4.txt]

02521241	_member_meronym	02521916	1
07800487	_instance_hypernym	01942177	0
02341974	_hypernym	02339376	1
08936303	_also_see	02513742	0
03109350	_instance_hypernym	04511002	1
00356367	_member_of_domain_region	08936303	0
00053609	_derivationally_related_form	00426958	1
09418484	_also_see	08729626	0
01631759	_hypernym	01626134	1
02595569	_instance_hypernym	03198951	0
08766988	_member_of_domain_region	09877443	1
09144117	_instance_hypernym	06883073	0
01215137	_derivationally_related_form	06547832	1
10641223	_hypernym	02630281	0
02923510	_derivationally_related_form	06234825	1
02483224	_member_of_domain_region	02661317	0
08897065	_has_part	09168020	1
12977296	_verb_group	01453188	0
00014742	_hypernym	00014405	1
09039260	_instance_hypernym	09168707	0
00211108	_derivationally_related_form	13460568	1
15187077	_similar_to	13505987	0
02354781	_hypernym	02353861	1
02192383	_member_meronym	02896789	0
14894140	_hypernym	14727670	1
02659808	_also_see	03251766	0
02441723	_member_meronym	02442845	1
13529616	_hypernym	09058071	0
00963283	_derivationally_related_form	06790042	1
02553196	_has_part	09959258	0
02832818	_derivationally_related_form	02720201	1
02477890	_member_meronym	09770949	0
01153305	_derivationally_related_form	00369194	1
00190999	_has_part	01245637	0
02601589	_member_meronym	02601921	1
15147850	_instance_hypernym	09701603	0
12043248	_member_meronym	12043444	1
02393300	_similar_to	02661317	0
01269360	_instance_hypernym	00223983	1
03074922	_synset_domain_topic_of	15171008	0
00702226	_derivationally_related_form	04438304	1
15171008	_has_part	00991838	0
02399000	_derivationally_related_form	01174555	1
05638778	_synset_domain_topic_of	13533470	0
09044862	_has_part	09110422	1
06369829	_similar_to	13505987	0
02453890	_member_meronym	02457586	1
01438720	_has_part	09084196	0
01292727	_hypernym	01292534	1
01650167	_has_part	01466828	0
02528534	_member_meronym	02540255	1
08349548	_has_part	08028148	0
02583139	_derivationally_related_form	00962129	1
02599207	_member_meronym	01942177	0
02927512	_derivationally_related_form	09044862	1
01227691	_instance_hypernym	03661861	0
00492677	_also_see	02111684	1
01282466	_member_of_domain_usage	01015996	0
02593863	_member_meronym	02595902	1
01440949	_verb_group	07631212	0
00210738	_derivationally_related_form	13077033	1
09907196	_similar_to	02444103	0
09044862	_member_of_domain_region	08122009	1
13030438	_has_part	09058071	0
03299648	_hypernym	03214670	1
12972414	_has_part	05273684	0
04300080	_derivationally_related_form	01594362	1
08811982	_member_of_domain_region	00981369	0
09401474	_instance_hypernym	09403734	1
02456147	_also_see	14752057	0
09052652	_member_meronym	10802283	1
02447896	_verb_group	10224098	0
02398854	_derivationally_related_form	10271677	1
01928390	_instance_hypernym	02558350	0
06778102	_derivationally_related_form	00853633	1
01889520	_similar_to	02586865	0
03829085	_hypernym	02718811	1
03380134	_derivationally_related_form	01245637	0
01478300	_member_meronym	01478511	1
09453288	_has_part	02458135	0
12982723	_hypernym	11592146	1
09064594	_hypernym	04418644	0
01454856	_hypernym	02552171	1
05959954	_hypernym	03970363	0
02870092	_derivationally_related_form	06413889	1
02967626	_also_see	09356080	0
04186848	_derivationally_related_form	01560369	1
09693372	_synset_domain_topic_of	02062991	0
06845599	_member_of_domain_usage	02705651	1
08143486	_has_part	15155891	0
01262936	_derivationally_related_form	07738353	1
01446760	_synset_domain_topic_of	00485711	0
08564307	_has_part	09109444	1
05638778	_verb_group	01543731	0
01042764	_hypernym	01041968	1
03324928	_synset_domain_topic_of	13529616	0
08860123	_member_of_domain_region	04240576	1
02571810	_derivationally_related_form	02499434	0
09169801	_instance_hypernym	08505573	1
02661317	_member_of_domain_usage	09082540	0
07450343	_derivationally_related_form	00855295	1
01137696	_member_meronym	09102517	0
12972818	_hypernym	11594676	1
02888000	_member_of_domain_usage	09093472	0
14607521	_derivationally_related_form	00264875	1
13030438	_synset_domain_topic_of	09111168	0
15155220	_has_part	15227846	1
01086945	_member_of_domain_region	03757925	0
09131654	_has_part	09244972	1
01645093	_member_of_domain_usage	00052146	0
05588174	_derivationally_related_form	02884456	1
04299699	_member_of_domain_usage	01303582	0
09714120	_derivationally_related_form	08953324	1
01645093	_member_of_domain_usage	02751782	0
09141526	_has_part	09145083	1
02621721	_verb_group	01440949	0
01639369	_member_meronym	01642671	1
04229107	_synset_domain_topic_of	03352961	0
00626800	_also_see	00625393	1
08851034	_derivationally_related_form	02457408	0
06845599	_member_of_domain_usage	04006727	1
08214272	_also_see	09201301	0
08381820	_hypernym	08381636	1
07803408	_member_of_domain_region	02281485	0
07556637	_derivationally_related_form	01167188	1
09313716	_derivationally_related_form	13752911	0
00854150	_derivationally_related_form	10221312	1
09058071	_instance_hypernym	02136285	0
08136260	_hypernym	08348815	1
02352390	_synset_domain_topic_of	10113362	0
10181990	_hypernym	10024119	1
03970363	_synset_domain_topic_of	06195698	0
08860123	_member_of_domain_region	02463990	1
09157163	_derivationally_related_form	08214272	0
06845599	_member_of_domain_usage	03771066	1
02608004	_member_of_domain_usage	01890860	0
06621447	_derivationally_related_form	02797021	1
13753740	_has_part	00585810	0
12992464	_member_meronym	12975207	1
02415577	_member_of_domain_region	15159819	0
09682291	_derivationally_related_form	02923510	1
08082236	_also_see	00585810	0
02424085	_hypernym	02419796	1
03324928	_synset_domain_topic_of	01466828	0
09119277	_has_part	09370383	1
05949937	_has_part	02608004	0
08860123	_member_of_domain_region	07722485	1
03021531	_verb_group	09066948	0
14487731	_derivationally_related_form	00492706	1
13875185	_member_of_domain_region	01439121	0
04762355	_derivationally_related_form	00625393	1
10198437	_instance_hypernym	00981369	0
13016457	_member_meronym	13001743	1
04419315	_also_see	01453330	0
01303582	_instance_hypernym	00962722	1
04577293	_member_of_domain_region	00513401	0
02536165	_has_part	07796165	1
09110229	_synset_domain_topic_of	08851034	0
02601344	_has_part	07784367	1
01320513	_has_part	01890860	0
08416652	_hypernym	08251877	1
07618871	_instance_hypernym	01873310	0
00963283	_derivationally_related_form	00963241	1
00329819	_member_of_domain_region	02658531	0
02176747	_hypernym	02176261	1
06310945	_member_meronym	15183802	0
06214580	_derivationally_related_form	10619176	1
05385363	_synset_domain_topic_of	02630281	0
07689217	_hypernym	07689003	1
08396537	_derivationally_related_form	03093574	0
12970379	_member_meronym	12970560	1
01454856	_has_part	04107984	0
10244913	_hypernym	09770949	1
09877443	_member_meronym	02343187	0
08780881	_member_of_domain_region	07036862	1
00431005	_instance_hypernym	10113362	0
02066450	_member_meronym	02068735	1
04603872	_member_meronym	02073041	0
09117351	_has_part	09123809	1
02356381	_member_meronym	15155891	0
04352070	_hypernym	02716205	1
01293167	_verb_group	02366825	0
13007417	_hypernym	12998815	1
13505987	_verb_group	00858377	0
03854065	_hypernym	04586932	1
14752057	_member_of_domain_usage	01444164	0
13002433	_member_meronym	13003522	1
04497962	_synset_domain_topic_of	09157021	0
02655523	_hypernym	02652668	1
04728376	_has_part	00431005	0
01245813	_derivationally_related_form	01078050	1
02620033	_synset_domain_topic_of	09125203	0
13077295	_derivationally_related_form	00210738	1
10550090	_similar_to	10382825	0
08615638	_derivationally_related_form	01934427	1
01128071	_hypernym	06310945	0
08860123	_member_of_domain_region	07696527	1
09418484	_has_part	02431785	0
09078231	_member_of_domain_region	06938493	1
09134999	_derivationally_related_form	09134999	0
09048880	_has_part	09147964	1
00089657	_verb_group	08012765	0
08365855	_derivationally_related_form	09945603	1
01015996	_has_part	02658531	0
08505573	_hypernym	07941945	1
01821634	_has_part	08936303	0
01523823	_derivationally_related_form	01244593	1
13950812	_hypernym	00374668	0
00366858	_derivationally_related_form	13572436	1
07380144	_similar_to	04018399	0
01273016	_hypernym	01531742	1
08936303	_has_part	01543731	0
14994328	_derivationally_related_form	00266586	1
01282466	_also_see	08790953	0
09134386	_has_part	09192708	1
00233614	_derivationally_related_form	02720725	0
02353844	_derivationally_related_form	03427296	1
02133902	_also_see	05525100	0
12992464	_member_meronym	12992868	1
00089657	_member_of_domain_usage	13533470	0
01953810	_derivationally_related_form	04473432	1
03021531	_member_of_domain_usage	01821634	0
09071690	_has_part	09074431	1
01444164	_member_meronym	04947628	0
02635013	_member_meronym	02635154	1
03074922	_also_see	01277288	0
09117351	_member_of_domain_region	01294127	1
04947628	_has_part	02595702	0
02416104	_hypernym	02414578	1
09736633	_has_part	10490421	0
15147850	_has_part	15146004	1
02343187	_verb_group	04438742	0
02456962	_hypernym	02453611	1
04586932	_member_meronym	01282466	0
13023292	_member_meronym	13024012	1
03654086	_also_see	00918471	0
02470451	_member_meronym	02483915	1
04473432	_similar_to	07803992	0
02601589	_member_meronym	02601767	1
09093472	_has_part	01277755	0
09150448	_instance_hypernym	08672738	1
09356639	_member_meronym	02281485	0
06845599	_member_of_domain_usage	03748456	1
09154178	_derivationally_related_form	01050896	0
03599761	_derivationally_related_form	02461063	1
09194357	_verb_group	12979129	0
02623170	_member_meronym	02623868	1
01442591	_derivationally_related_form	01442591	0
08894456	_has_part	09430771	1
02599207	_derivationally_related_form	12968658	0
09416076	_hypernym	00019128	1
00329819	_has_part	08404895	0
00963283	_derivationally_related_form	04879658	1
01440949	_instance_hypernym	01438720	0
02131418	_member_meronym	02133902	1
13752911	_also_see	02471467	0
02509197	_hypernym	02507649	1
08729626	_also_see	09418484	0
01448291	_hypernym	01446589	1
02366825	_verb_group	03021531	0
14894140	_derivationally_related_form	02192383	1
01650167	_hypernym	01126846	0
06295235	_member_of_domain_usage	03443912	1
01319874	_instance_hypernym	09134999	0
09139380	_instance_hypernym	08665504	1
06263609	_member_of_domain_region	09351647	0
02602405	_hypernym	02552171	1
02534734	_instance_hypernym	09717047	0
03457686	_hypernym	03461385	1
03869222	_synset_domain_topic_of	12084746	0
02484975	_hypernym	02484473	1
03098140	_also_see	01442591	0
02449921	_member_meronym	02450034	1
09064594	_also_see	02343772	0
13024967	_member_meronym	13025647	1
02580991	_similar_to	08214272	0
06845599	_member_of_domain_usage	14753808	1
07678193	_similar_to	06880664	0
02112891	_similar_to	02111684	1
03519981	_member_of_domain_region	08790953	0
00624263	_derivationally_related_form	06372095	1
05949937	_instance_hypernym	13064678	0
01642671	_member_meronym	01643092	1
01915365	_similar_to	00223854	0
13052931	_hypernym	13049953	1
04221994	_member_meronym	03918297	0
08953151	_has_part	08953324	1
09692624	_hypernym	03909835	0
02797021	_derivationally_related_form	06593803	1
02888000	_hypernym	14705533	0
00902932	_derivationally_related_form	06630627	1
06767777	_synset_domain_topic_of	09313716	0
09886807	_hypernym	09700492	1
01881857	_has_part	00981369	0
02548689	_hypernym	02552171	1
07927197	_similar_to	07927197	0
13516176	_derivationally_related_form	00210738	1
01282466	_member_of_domain_usage	02934168	0
07803408	_hypernym	07803545	1
02398854	_verb_group	00088713	0
02400139	_member_meronym	02423787	1
15171008	_derivationally_related_form	09155986	0
06845599	_member_of_domain_usage	03818843	1
04242704	_verb_group	00459114	0
08860123	_member_of_domain_region	08547300	1
13064678	_hypernym	09719430	0
02064154	_member_meronym	02064608	1
01440949	_similar_to	03661861	0
08174398	_member_meronym	09044862	1
02653497	_hypernym	04418644	0
02007417	_derivationally_related_form	00281132	1
00019128	_verb_group	08797254	0
02465414	_derivationally_related_form	01186428	1
14040660	_member_of_domain_usage	02595339	0
08999482	_member_of_domain_region	09327077	1
02720725	_hypernym	08570758	0
08860123	_member_of_domain_region	13752172	1
09478355	_instance_hypernym	13753740	0
02396427	_hypernym	02395003	1
01274909	_verb_group	09093472	0
02395244	_member_meronym	02396427	1
04760771	_member_of_domain_region	10102369	0
01552956	_member_meronym	01553142	1
01274909	_member_of_domain_region	00431005	0
04112752	_derivationally_related_form	00103317	1
13076181	_member_meronym	07635155	0
08014860	_instance_hypernym	08392137	1
01137696	_instance_hypernym	00856847	0
02011810	_derivationally_related_form	01778568	1
08339454	_member_of_domain_region	00126721	0
06960298	_derivationally_related_form	02957823	1
00356367	_has_part	09111168	0
02658944	_member_meronym	02659176	1
01928390	_synset_domain_topic_of	05949937	0
00853633	_derivationally_related_form	00431005	1
12975608	_similar_to	03663433	0
13010219	_hypernym	11590783	1
08785958	_instance_hypernym	06310945	0
12060546	_hypernym	12041446	1
09692624	_member_meronym	05525100	0
02329093	_member_meronym	02329401	1
03966976	_also_see	00991838	0
02535909	_member_meronym	02536864	1
00858377	_member_of_domain_usage	02031622	0
02354950	_member_meronym	02355711	1
10460033	_member_of_domain_region	13753740	0
02400139	_member_meronym	02407959	1
04473432	_member_of_domain_usage	12963140	0
10082146	_derivationally_related_form	00991838	1
00025654	_has_part	08729626	0
08723006	_member_of_domain_region	05915584	1
02352390	_synset_domain_topic_of	09356639	0
09721244	_derivationally_related_form	08961402	1
02571486	_instance_hypernym	02571486	0
06295235	_member_of_domain_usage	07140348	1
02665282	_member_meronym	03661861	0
02660769	_member_meronym	02661765	1
03928814	_verb_group	09292751	0
02366702	_member_meronym	02366825	1
02281485	_hypernym	02534734	0
01244593	_derivationally_related_form	00038365	1
12975608	_verb_group	12058822	0
09095023	_has_part	09095751	1
09064594	_instance_hypernym	10382825	0
04051825	_derivationally_related_form	01130607	1
00215683	_verb_group	09229409	0
02672859	_derivationally_related_form	13529616	1
06147873	_has_part	08339454	0
14883206	_derivationally_related_form	00443670	1
07678193	_member_of_domain_region	00842692	0
09095751	_has_part	03009477	1
06776783	_member_meronym	04178329	0
00902932	_hypernym	00897241	1
15183802	_has_part	06369829	0
12998349	_member_meronym	13016457	1
02595339	_also_see	02580991	0
03568653	_hypernym	03828465	1
14040846	_has_part	00019128	0
08723006	_has_part	09327881	1
06349220	_derivationally_related_form	09458791	0
09051235	_has_part	09075842	1
09082540	_verb_group	02661317	0
08860123	_member_of_domain_region	08555333	1
12968658	_verb_group	02423465	0
00159899	_derivationally_related_form	00880227	1
09093472	_member_of_domain_usage	10102369	0
12963796	_member_meronym	12965209	1
01015996	_also_see	01928390	0
01604251	_derivationally_related_form	00299680	1
15298507	_member_meronym	01942177	0
13011856	_member_meronym	13012030	1
03198951	_similar_to	12977565	0
02716866	_hypernym	02716205	1
09144117	_member_meronym	09091398	0
08766988	_has_part	08775784	1
00842692	_derivationally_related_form	01446760	0
00491689	_derivationally_related_form	09440186	1
06195698	_similar_to	03198951	0
09095023	_has_part	09306031	1
04577293	_similar_to	02073041	0
01471070	_member_meronym	01626134	1
13505987	_member_of_domain_region	01227691	0
00897241	_derivationally_related_form	06630017	1
09907196	_verb_group	01050896	0
12979630	_hypernym	11592146	1
07635155	_synset_domain_topic_of	00485711	0
01542207	_verb_group	01541579	1
13802098	_also_see	01881857	0
01503061	_has_part	01896031	1
15298507	_similar_to	12972414	0
02640857	_hypernym	02640242	1
14894140	_member_of_domain_usage	09356080	0
14487731	_derivationally_related_form	00493259	1
02431785	_member_meronym	03233423	0
02074915	_member_meronym	02083038	1
02458135	_similar_to	07623933	0
01645278	_hypernym	01626600	1
02456147	_hypernym	13030438	0
13065215	_member_meronym	13065514	1
02659808	_hypernym	06349220	0
00230172	_derivationally_related_form	02156546	1
03928814	_member_meronym	03928814	0
08801678	_has_part	08804962	1
06147873	_member_of_domain_usage	00419375	0
02534734	_has_part	07795751	1
06310945	_synset_domain_topic_of	06883073	0
02117900	_hypernym	02117135	1
02608004	_has_part	10595361	0
04412727	_hypernym	02720201	1
02367993	_member_meronym	09131428	0
00853633	_derivationally_related_form	10221312	1
09453288	_member_of_domain_usage	02652132	0
01015996	_derivationally_related_form	10366779	1
04577293	_member_meronym	02352390	0
02648313	_hypernym	02647660	1
09292751	_derivationally_related_form	10102369	0
14996020	_derivationally_related_form	01245637	1
00356367	_member_of_domain_region	08250635	0
04879658	_derivationally_related_form	00963283	1
01277755	_derivationally_related_form	06349220	0
09075842	_has_part	09076675	1
02483224	_hypernym	03093184	0
02641825	_member_meronym	02646377	1
07066459	_member_of_domain_usage	10224098	0
15155220	_has_part	15165490	1
09157021	_hypernym	09082540	0
14599641	_derivationally_related_form	00264875	1
00356367	_instance_hypernym	13010219	0
10338094	_derivationally_related_form	02390101	1
01442591	_derivationally_related_form	09091398	0
02551824	_member_meronym	02552171	1
10717921	_also_see	02621721	0
06845599	_member_of_domain_usage	04407007	1
01274909	_instance_hypernym	02571810	0
01299735	_has_part	01295918	1
15147850	_similar_to	03661861	0
01647803	_member_meronym	01648001	1
07851054	_verb_group	09313716	0
08860123	_member_of_domain_region	04314522	1
00223854	_member_of_domain_usage	02124623	0
08766988	_member_of_domain_region	09222742	1
07913081	_hypernym	07631212	0
02136271	_derivationally_related_form	04069276	1
04242704	_member_meronym	02343772	0
04010348	_hypernym	02720725	1
08505573	_has_part	09110229	0
08860123	_member_of_domain_region	08504851	1
08012765	_instance_hypernym	07842753	0
02379753	_derivationally_related_form	00212205	1
02068206	_synset_domain_topic_of	04993882	0
04733204	_derivationally_related_form	02262542	1
01543731	_member_of_domain_region	14604959	0
13060689	_member_meronym	13060912	1
01650167	_has_part	02499434	0
04473432	_derivationally_related_form	01953810	1
09124039	_similar_to	12063414	0
07229747	_hypernym	07229530	1
09194357	_member_of_domain_usage	02369012	0
08780881	_has_part	08783286	1
09076982	_member_of_domain_region	13005329	0
14686913	_derivationally_related_form	00442267	1
07913081	_instance_hypernym	09124039	0
13054211	_member_meronym	13055009	1
14487184	_synset_domain_topic_of	15147850	0
12039743	_member_meronym	12045352	1
02580991	_similar_to	14040660	0
01915131	_derivationally_related_form	02898711	1
01086945	_derivationally_related_form	08404895	0
08305942	_hypernym	08168978	1
01474283	_also_see	10160624	0
08860123	_member_of_domain_region	03702719	1
02408217	_has_part	13752911	0
07673397	_hypernym	07672135	1
02513742	_member_of_domain_region	07842753	0
03519578	_hypernym	03519981	1
14894140	_similar_to	14894140	0
01640383	_member_meronym	01640567	1
09122968	_has_part	02137549	0
02641608	_member_meronym	02651846	1
14752057	_has_part	09142674	0
01465994	_member_meronym	01467986	1
09114696	_also_see	02133902	0
03467517	_hypernym	04338517	1
01015996	_verb_group	01282466	0
13030852	_hypernym	13028611	1
01821634	_instance_hypernym	00356367	0
02412440	_derivationally_related_form	00058265	1
01480880	_has_part	04955160	0
08174398	_member_meronym	08780881	1
02355477	_has_part	01285305	0
02854739	_hypernym	04508489	1
03534890	_hypernym	09351647	0
02389346	_verb_group	02389592	1
04221994	_verb_group	10641223	0
14807929	_hypernym	05407119	1
04419315	_member_of_domain_region	08764561	0
12985236	_hypernym	11592146	1
12975608	_member_of_domain_usage	08726463	0
14859622	_hypernym	14961512	1
08726463	_similar_to	01439121	0
02505809	_member_meronym	02505998	1
12048231	_instance_hypernym	02031622	0
06871384	_derivationally_related_form	01050896	1
02595339	_member_of_domain_region	02989685	0
13016457	_member_meronym	13232515	1
03098140	_has_part	03098140	0
02659808	_hypernym	02658079	1
12048772	_member_of_domain_region	00585810	0
09070793	_has_part	02956500	1
12975608	_has_part	03663433	0
00432839	_derivationally_related_form	14489113	1
01050896	_derivationally_related_form	00126721	0
09368224	_derivationally_related_form	08641113	1
14672224	_also_see	03976268	0
00680485	_derivationally_related_form	06211078	1
00233614	_synset_domain_topic_of	07635155	0
02340186	_hypernym	02339922	1
02415577	_derivationally_related_form	02377480	0
02175958	_derivationally_related_form	04989657	1
02343772	_synset_domain_topic_of	07380144	0
00086835	_derivationally_related_form	00824054	1
02553196	_derivationally_related_form	09110229	0
13000372	_member_meronym	13005568	1
08804487	_similar_to	04221994	0
09117351	_has_part	09192973	1
08790953	_member_of_domain_usage	07635155	0
09761068	_derivationally_related_form	02470685	1
04497962	_similar_to	10113362	0
02399000	_hypernym	02394477	1
02896789	_also_see	09313716	0
13753585	_hypernym	13745420	1
07842753	_verb_group	08936303	0
10621514	_derivationally_related_form	00849294	1
02336011	_member_of_domain_usage	09154178	0
09095023	_member_of_domain_region	01283935	1
02338592	_derivationally_related_form	02352390	0
08860123	_member_of_domain_region	09351547	1
01015996	_member_meronym	05949937	0
00772813	_derivationally_related_form	00963283	1
14604959	_member_meronym	06883073	0
09284015	_derivationally_related_form	01567888	1
02456147	_has_part	09877443	0
02071294	_hypernym	02068974	1
09066948	_similar_to	08250635	0
07622261	_derivationally_related_form	01265740	1
03251766	_instance_hypernym	07066459	0
08095647	_member_meronym	08096474	1
01274909	_member_meronym	02661317	0
00410406	_derivationally_related_form	09738708	1
09058071	_verb_group	08505573	0
02549533	_member_meronym	02549796	1
13881512	_also_see	14487184	0
06845599	_member_of_domain_usage	14753414	1
13875185	_synset_domain_topic_of	14607521	0
06695862	_derivationally_related_form	00880227	1
13950812	_instance_hypernym	01449586	0
00883635	_hypernym	00883226	1
02509694	_member_of_domain_usage	02553196	0
02649218	_hypernym	02648625	1
01885367	_also_see	02136285	0
01645634	_hypernym	01626134	1
03198951	_instance_hypernym	08936303	0
14836468	_hypernym	14732946	1
06366581	_member_meronym	06310945	0
09709001	_hypernym	09708405	1
07752264	_verb_group	05638778	0
08554440	_hypernym	08553535	1
02952109	_member_meronym	00459114	0
13077033	_hypernym	12992868	1
09076982	_hypernym	00513401	0
13043516	_hypernym	11590783	1
12977296	_member_meronym	08095647	0
13575433	_derivationally_related_form	00458754	1
00991838	_similar_to	09807754	0
01398941	_derivationally_related_form	04049405	1
13048666	_verb_group	02457408	0
02528534	_member_meronym	02541431	1
04349701	_member_of_domain_usage	14299336	0
08801678	_member_of_domain_region	06964247	1
06349220	_synset_domain_topic_of	02192383	0
08368308	_derivationally_related_form	02875499	1
13003254	_also_see	09144117	0
02425086	_hypernym	02419796	1
09717047	_verb_group	07927197	0
01640383	_member_meronym	01640846	1
02582591	_instance_hypernym	09702134	0
08563627	_has_part	09057311	1
01086945	_synset_domain_topic_of	07678193	0
08801099	_member_meronym	09696124	1
02343772	_has_part	00855295	0
01190840	_derivationally_related_form	07891726	1
03251766	_member_of_domain_region	14705533	0
09301249	_instance_hypernym	09241247	1
09731906	_instance_hypernym	01282466	0
01883212	_member_meronym	01883513	1
02343187	_has_part	09144117	0
09071690	_has_part	09378014	1
09292751	_instance_hypernym	02356381	0
08342039	_hypernym	08339454	1
02989685	_has_part	02601921	0
04353016	_hypernym	04352070	1
01449586	_has_part	02627292	0
13070003	_hypernym	11590783	1
15171008	_hypernym	09155986	0
02607630	_member_meronym	02609466	1
09343422	_also_see	04577293	0
13039870	_member_meronym	13040108	1
02192383	_synset_domain_topic_of	09313716	0
02535349	_member_meronym	02535537	1
00419375	_member_meronym	01293650	0
00105778	_derivationally_related_form	09930876	1
09945603	_member_of_domain_usage	02571486	0
09682803	_derivationally_related_form	08095647	1
01844859	_hypernym	02398463	0
01890860	_hypernym	01889520	1
02553196	_member_meronym	02595702	0
02936020	_derivationally_related_form	06321702	1
01645093	_derivationally_related_form	02595702	0
15169248	_hypernym	15228378	1
06369829	_has_part	01304121	0
03933529	_derivationally_related_form	02331175	1
01277288	_instance_hypernym	14894140	0
10272171	_hypernym	09886010	1
02595339	_member_of_domain_region	03966976	0
14599168	_hypernym	14739360	1
02031622	_member_meronym	00858377	0
13060451	_member_meronym	13062112	1
02630468	_synset_domain_topic_of	04419315	0
00252710	_derivationally_related_form	15147850	1
01645093	_similar_to	08095647	0
02521241	_member_meronym	02525543	1
02601767	_member_of_domain_region	10621514	0
10146927	_derivationally_related_form	00899597	1
09313716	_similar_to	09693372	0
05951969	_derivationally_related_form	10306279	1
07851054	_member_of_domain_region	09144117	0
03315644	_derivationally_related_form	01271189	1
02575325	_synset_domain_topic_of	03757925	0
02435853	_hypernym	02399000	1
02338592	_verb_group	02586865	0
06845599	_member_of_domain_usage	03295357	1
09111168	_has_part	09089782	0
04764741	_derivationally_related_form	00485711	1
13030852	_instance_hypernym	05525100	0
08723006	_member_of_domain_region	08321469	1
02720725	_instance_hypernym	02595569	0
09052314	_instance_hypernym	09044862	1
09397391	_similar_to	02630281	0
12083339	_member_meronym	12083591	1
02601767	_similar_to	09418484	0
09060768	_has_part	09358096	1
13950812	_has_part	02558350	0
09044862	_has_part	09067277	1
13003254	_similar_to	02457408	0
06214744	_derivationally_related_form	00408852	1
08851034	_hypernym	06310945	0
13037124	_hypernym	11592146	1
04018399	_member_meronym	02682424	0
00713250	_derivationally_related_form	01266895	1
08787466	_hypernym	02509694	0
06845599	_member_of_domain_usage	14747168	1
08782976	_hypernym	02629410	0
08801678	_member_of_domain_region	08541609	1
06369829	_hypernym	08396537	0
13298935	_hypernym	13298701	1
08787466	_member_of_domain_usage	06883073	0
02409202	_hypernym	02407959	1
08570758	_member_meronym	03966976	0
08860123	_member_of_domain_region	06699225	1
02650928	_has_part	02346627	0
00105778	_derivationally_related_form	00427580	1
10198437	_also_see	12048231	0
07858595	_derivationally_related_form	02195470	1
02682424	_similar_to	10595361	0
13015229	_hypernym	11592146	1
09219078	_similar_to	01320513	0
08174398	_member_meronym	09039411	1
01164874	_also_see	07649463	0
00419137	_derivationally_related_form	07443210	1
10489944	_member_of_domain_region	00329819	0
06845599	_member_of_domain_usage	03155334	1
00233614	_member_meronym	12977565	0
05716744	_derivationally_related_form	02196690	1
09082540	_member_of_domain_region	04648207	0
02420789	_derivationally_related_form	00719705	1
03534890	_similar_to	00329819	0
01468238	_hypernym	01466257	1
04418644	_member_meronym	13753740	0
00575970	_derivationally_related_form	15055633	1
01439121	_also_see	02682424	0
09232165	_instance_hypernym	09475292	1
01466828	_has_part	08797254	0
08124971	_has_part	08125722	1
07618871	_synset_domain_topic_of	09083390	0
12998349	_member_meronym	13074084	1
08726463	_hypernym	08082236	0
08641113	_derivationally_related_form	10352299	1
09082540	_similar_to	02073041	0
06201908	_derivationally_related_form	00680346	1
09131428	_instance_hypernym	02174461	0
00880227	_derivationally_related_form	06695579	1
04955160	_has_part	07450549	0
08984788	_has_part	09453566	1
00329819	_synset_domain_topic_of	02595569	0
06845599	_member_of_domain_usage	04006953	1
04299699	_instance_hypernym	02423465	0
02066707	_hypernym	02062744	1
00431005	_synset_domain_topic_of	03251766	0
08929922	_member_of_domain_region	13753274	1
09736633	_derivationally_related_form	01128071	0
01126846	_hypernym	01127411	1
03661861	_verb_group	15187077	0
06413889	_derivationally_related_form	07009946	1
06310945	_derivationally_related_form	01453188	0
12968408	_member_meronym	12970379	1
09472597	_synset_domain_topic_of	01885367	0
09127461	_instance_hypernym	09399592	1
03962525	_verb_group	02136285	0
00883226	_derivationally_related_form	07230089	1
13076181	_member_of_domain_region	09219078	0
00135285	_derivationally_related_form	06372095	1
03352961	_member_of_domain_region	02458135	0
10490421	_hypernym	09841188	1
02571486	_instance_hypernym	09356639	0
04051068	_hypernym	02673637	1
01304121	_instance_hypernym	08505573	0
02340930	_hypernym	02339376	1
02447896	_similar_to	09242037	0
08929922	_member_of_domain_region	06964901	1
07635155	_also_see	00842692	0
02593863	_member_meronym	02596888	1
02477890	_member_of_domain_usage	13881512	0
06845599	_member_of_domain_usage	04476633	1
01245637	_also_see	02620033	0
09119277	_has_part	04604009	1
09867154	_has_part	09125203	0
08674970	_derivationally_related_form	02468965	1
12977296	_derivationally_related_form	07450549	0
00105554	_derivationally_related_form	00431005	1
13048666	_member_meronym	07649463	0
09038990	_has_part	09719430	1
09125203	_derivationally_related_form	02431785	0
09243405	_instance_hypernym	09215664	1
09701603	_verb_group	02444103	0
15159583	_derivationally_related_form	00734927	1
01442591	_also_see	01480880	0
02633677	_hypernym	02632989	1
00019128	_member_meronym	09157021	0
00485711	_derivationally_related_form	04764741	1
13041725	_member_meronym	08579487	0
01896031	_has_part	01897991	1
12977565	_member_meronym	09807754	0
01696135	_derivationally_related_form	04694809	1
04419315	_instance_hypernym	01268112	0
03670622	_hypernym	02716866	1
14487731	_has_part	03970363	0
09087599	_has_part	09368479	1
09959258	_member_of_domain_region	08936303	0
08149781	_hypernym	08081668	1
02553196	_member_meronym	02062991	0
09260466	_hypernym	09416076	1
04993882	_synset_domain_topic_of	09678009	0
13024763	_member_meronym	13024967	1
08729283	_member_of_domain_region	00858377	0
02534352	_member_meronym	02535349	1
03074922	_member_of_domain_region	01890860	0
01891438	_member_meronym	01891633	1
07649463	_member_of_domain_region	10641223	0
03612814	_hypernym	03990474	1
02447896	_synset_domain_topic_of	02571486	0
09044862	_has_part	09111366	1
02355477	_has_part	08256968	0
03662016	_hypernym	03681148	1
02408217	_synset_domain_topic_of	01466828	0
02396796	_hypernym	02395003	1
10641223	_member_of_domain_usage	14411243	0
09082540	_has_part	09084483	1
08504594	_instance_hypernym	04760771	0
10318892	_derivationally_related_form	01743531	1
03757925	_member_meronym	02658531	0
12978969	_hypernym	11590783	1
04299699	_instance_hypernym	13041725	0
06845599	_member_of_domain_usage	04443588	1
13881512	_member_of_domain_region	09168707	0
02989475	_hypernym	02996840	1
01885367	_synset_domain_topic_of	01645278	0
06344461	_hypernym	06343971	1
02613960	_derivationally_related_form	07631212	0
01874928	_hypernym	01874434	1
06776783	_member_of_domain_usage	02558350	0
15228378	_hypernym	15129927	1
07752264	_derivationally_related_form	08505573	0
10352299	_derivationally_related_form	08641113	1
01696648	_member_of_domain_region	09085441	0
02068735	_member_meronym	02069569	1
01015996	_hypernym	03519981	0
02324045	_has_part	02158739	1
02415577	_synset_domain_topic_of	02630281	0
02356108	_member_meronym	02355477	1
09693372	_member_meronym	14411243	0
03362393	_hypernym	02715941	1
02661317	_has_part	09082540	0
05681117	_has_part	05768553	1
09368224	_member_of_domain_usage	01696648	0
07427337	_derivationally_related_form	00223500	1
14040846	_member_of_domain_usage	15071684	0
10582154	_derivationally_related_form	02540670	1
02575325	_synset_domain_topic_of	05949937	0
09078231	_member_of_domain_region	02581957	1
00089657	_similar_to	13623054	0
02507337	_member_meronym	02509694	1
10384214	_member_of_domain_region	01293650	0
10268299	_derivationally_related_form	02614387	1
09472597	_synset_domain_topic_of	09064594	0
07443210	_derivationally_related_form	00441212	1
02366825	_has_part	02369012	0
08780881	_member_of_domain_region	09542697	1
04438742	_synset_domain_topic_of	08095647	0
02015168	_derivationally_related_form	00057306	1
02601767	_hypernym	13041725	0
09039411	_member_of_domain_region	06340047	1
08782976	_instance_hypernym	04535524	0
02430191	_derivationally_related_form	01081456	1
09070487	_has_part	02896789	0
06845599	_member_of_domain_usage	03588668	1
09678009	_member_of_domain_usage	02682424	0
06295235	_member_of_domain_usage	09212572	1
13041725	_verb_group	05407119	0
02335349	_member_meronym	02338029	1
03586631	_derivationally_related_form	09111168	0
13007770	_hypernym	11592146	1
02062991	_similar_to	13623054	0
07679356	_derivationally_related_form	01337653	1
02632239	_member_of_domain_usage	09397391	0
02331309	_hypernym	02331046	1
09070487	_similar_to	10102369	0
00680346	_hypernym	00680145	1
06349220	_member_of_domain_region	02499434	0
08986066	_instance_hypernym	08691669	1
09194357	_similar_to	02660769	0
11517494	_derivationally_related_form	00073584	1
09717047	_has_part	13529616	0
09067277	_has_part	09373716	1
10102369	_derivationally_related_form	02073041	0
00842692	_derivationally_related_form	01186428	1
09356639	_also_see	09242037	0
00492677	_derivationally_related_form	08615374	1
07803408	_verb_group	01465713	0
13005329	_hypernym	12998815	1
02509197	_verb_group	09313716	0
07653394	_hypernym	07649854	1
02431785	_similar_to	08319198	0
10382825	_derivationally_related_form	03854065	1
02553196	_hypernym	02502357	0
02652668	_hypernym	02552171	1
01466828	_member_of_domain_region	09070487	0
00088725	_derivationally_related_form	01215137	1
10208189	_also_see	04497962	0
02453890	_member_meronym	02456776	1
02509694	_also_see	09144117	0
09400667	_instance_hypernym	09440186	1
07842753	_hypernym	09110229	0
01158572	_derivationally_related_form	13451804	1
02599207	_verb_group	09867154	0
07779747	_hypernym	07775905	1
02535909	_derivationally_related_form	05959954	0
01653026	_hypernym	01639765	1
09682803	_also_see	05273684	0
02358091	_hypernym	02355227	1
02571486	_instance_hypernym	09100982	0
04947628	_hypernym	04947186	1
02471467	_instance_hypernym	14040846	0
09075842	_has_part	09378014	1
07851054	_also_see	02343187	0
08860123	_member_of_domain_region	07450343	1
02632239	_instance_hypernym	03654086	0
00040188	_derivationally_related_form	00256961	1
03021531	_synset_domain_topic_of	05638778	0
02411705	_has_part	02439568	1
01547001	_member_meronym	00918471	0
09044862	_has_part	09059274	1
03093574	_member_of_domain_usage	13623054	0
00991838	_derivationally_related_form	14864360	1
02629410	_member_of_domain_region	02608004	0
02510455	_hypernym	02507649	1
09242037	_member_of_domain_usage	02338592	0
02546075	_derivationally_related_form	10183757	1
02509197	_hypernym	01128071	0
02553196	_member_meronym	02621721	1
04018399	_verb_group	09397391	0
00191517	_derivationally_related_form	13496771	1
01439121	_derivationally_related_form	00627437	0
02400139	_member_meronym	02409702	1
10717921	_member_of_domain_usage	01050896	0
14841267	_derivationally_related_form	02112891	1
03586631	_instance_hypernym	00052146	0
01167981	_derivationally_related_form	08253815	1
14411243	_verb_group	01304121	0
00492677	_derivationally_related_form	04764741	1
01442591	_member_of_domain_usage	02136285	0
02341475	_hypernym	02339376	1
02652979	_derivationally_related_form	04349701	0
10162354	_derivationally_related_form	03497657	1
02356381	_instance_hypernym	01650167	0
02130308	_hypernym	02127808	1
05407119	_also_see	02652979	0
01141938	_derivationally_related_form	02062744	1
02595339	_also_see	03198951	0
07590611	_hypernym	07588947	1
02595339	_has_part	10209731	0
02380009	_derivationally_related_form	10525617	1
09682803	_member_meronym	00223983	0
01888520	_member_meronym	01893535	1
09351647	_member_of_domain_usage	02989685	0
01560369	_derivationally_related_form	00360242	1
14607521	_member_meronym	12048772	0
01648494	_member_meronym	01648620	1
15183802	_has_part	13042814	0
09194357	_has_part	09357847	1
09719430	_instance_hypernym	02458135	0
12967776	_hypernym	11590783	1
10595361	_synset_domain_topic_of	00918471	0
08932568	_has_part	08933621	1
00223983	_hypernym	05345581	0
01445027	_derivationally_related_form	14757547	1
09867154	_instance_hypernym	01227691	0
02457756	_member_meronym	02457945	1
09084196	_member_of_domain_usage	14604959	0
13660178	_derivationally_related_form	00491689	1
13752911	_verb_group	01465713	0
01130607	_derivationally_related_form	04051825	1
09100982	_instance_hypernym	02888000	0
06845599	_member_of_domain_usage	15071684	1
01454856	_instance_hypernym	01164874	0
02602212	_derivationally_related_form	07515974	1
04586932	_similar_to	02658531	0
03497657	_has_part	02902079	1
09478355	_derivationally_related_form	02415577	0
09103943	_has_part	09459557	1
08790953	_member_of_domain_region	03966976	0
00161739	_derivationally_related_form	01696648	1
02653497	_similar_to	09397391	0
08133189	_hypernym	08337324	1
12084746	_member_of_domain_usage	02102605	0
00799537	_derivationally_related_form	02414473	1
08797254	_synset_domain_topic_of	04760771	0
13205482	_member_meronym	13210006	1
04760771	_verb_group	07927197	0
08860123	_member_of_domain_region	04441528	1
01915365	_similar_to	00223854	0
09109444	_has_part	09109882	1
03074922	_instance_hypernym	02720725	0
01305361	_hypernym	02085742	1
03198951	_instance_hypernym	03869222	0
02336011	_hypernym	02329401	1
09229409	_derivationally_related_form	00223983	0
03970363	_hypernym	02896442	1
12972414	_hypernym	13802098	0
03061081	_derivationally_related_form	05996646	1
09478355	_has_part	08800676	0
13486270	_derivationally_related_form	00442267	1
08214272	_member_of_domain_usage	09134999	0
01382818	_derivationally_related_form	01639765	1
09770949	_derivationally_related_form	09124039	0
02673480	_hypernym	02832168	1
09234104	_member_of_domain_usage	02652979	0
08860123	_member_of_domain_region	07635155	1
02447896	_member_of_domain_usage	03928814	0
13006377	_hypernym	11592146	1
09102517	_derivationally_related_form	02431785	0
01075117	_hypernym	00954086	1
00858377	_synset_domain_topic_of	15147850	0
02784732	_derivationally_related_form	01273263	1
08396537	_instance_hypernym	08250635	0
06295235	_member_of_domain_usage	03885028	1
08800676	_member_of_domain_region	02630468	0
00089154	_derivationally_related_form	14283632	1
01446760	_has_part	02558350	0
02907985	_instance_hypernym	04511002	1
02896789	_member_of_domain_usage	06349220	0
15058163	_hypernym	15057744	1
09731906	_similar_to	09114696	0
08910668	_has_part	09237404	1
13048666	_member_of_domain_usage	10641223	0
14276936	_hypernym	14070360	1
09678009	_member_of_domain_usage	01884348	0
08214470	_hypernym	08190754	1
09907196	_derivationally_related_form	00858377	0
13038944	_member_meronym	13046285	1
13048666	_also_see	14752057	0
00366858	_derivationally_related_form	15055633	1
03380134	_member_of_domain_region	01631759	0
08860123	_member_of_domain_region	13359941	1
02535909	_derivationally_related_form	03325769	0
02652979	_member_meronym	02653359	1
08095647	_verb_group	09192973	0
13029946	_member_meronym	13030157	1
01320513	_member_of_domain_region	03909835	0
09114696	_has_part	09418484	1
12084746	_derivationally_related_form	08726463	0
03914919	_derivationally_related_form	01543731	1
00431005	_instance_hypernym	04648207	0
09109444	_has_part	09441725	1
02582591	_member_of_domain_region	01466828	0
05410646	_hypernym	05407119	1
13875185	_synset_domain_topic_of	00088713	0
13063269	_hypernym	12992868	1
06310945	_similar_to	12048772	0
03928814	_hypernym	03614007	1
02124623	_member_of_domain_usage	02369012	0
02483915	_member_meronym	02484473	1
06147873	_also_see	12063414	0
02068206	_hypernym	02066707	1
01438720	_member_meronym	09168707	0
02654425	_hypernym	02652668	1
02338592	_similar_to	03324928	0
06845599	_member_of_domain_usage	03554131	1
07913081	_has_part	01631759	0
00483656	_derivationally_related_form	06863751	1
04349701	_member_of_domain_usage	09478355	0
13063046	_hypernym	11594676	1
09772746	_has_part	01453330	0
00604617	_derivationally_related_form	04718563	1
08028148	_member_of_domain_region	01303582	0
06295235	_member_of_domain_usage	04323819	1
09122968	_hypernym	00459114	0
01144550	_derivationally_related_form	02443484	1
09692624	_instance_hypernym	01883920	0
09049599	_has_part	09103943	1
04242704	_verb_group	01084180	0
13003522	_hypernym	12998815	1
09693372	_member_meronym	06195698	0
14974264	_derivationally_related_form	01268457	1
12978381	_instance_hypernym	04760771	0
08860123	_member_of_domain_region	07889814	1
09807754	_also_see	02967626	0
02355477	_hypernym	02355227	1
01282466	_similar_to	09134999	0
09060768	_has_part	09326467	1
03093574	_has_part	01444164	0
06510977	_derivationally_related_form	02896789	1
09397391	_has_part	00088713	0
04248851	_derivationally_related_form	01480770	1
05345581	_hypernym	08579487	0
01758308	_derivationally_related_form	01173813	1
08122141	_similar_to	09332976	0
14705718	_derivationally_related_form	01354006	1
01883920	_synset_domain_topic_of	03976268	0
09044862	_member_of_domain_region	08303692	1
01164874	_member_of_domain_usage	01304121	0
12992464	_member_meronym	11592146	1
14672224	_synset_domain_topic_of	01320513	0
03747746	_hypernym	03771443	1
02343187	_verb_group	10641223	0
13031956	_hypernym	11592146	1
10113362	_hypernym	02408217	0
01320513	_derivationally_related_form	10587227	1
02599207	_member_meronym	03233423	0
02485451	_derivationally_related_form	01164874	1
09155986	_instance_hypernym	09114696	0
01193099	_derivationally_related_form	00840630	1
02553196	_member_meronym	09144117	0
13210006	_hypernym	13167078	1
08028148	_verb_group	13505987	0
03550533	_hypernym	02718469	1
08122141	_has_part	09313716	0
02590237	_member_meronym	02592244	1
02595569	_member_of_domain_usage	07623933	0
02373093	_member_meronym	02373601	1
09089782	_similar_to	13623054	0
12982103	_hypernym	11590783	1
09959258	_derivationally_related_form	09142674	0
04353410	_hypernym	03828465	1
12977565	_member_of_domain_usage	14672224	0
02072355	_member_meronym	02072493	1
12968658	_derivationally_related_form	09229409	0
09711132	_hypernym	09710164	1
09201301	_synset_domain_topic_of	09201301	0
01290435	_instance_hypernym	01075117	1
09701603	_member_of_domain_usage	02612393	0
09250165	_instance_hypernym	09453008	1
04438742	_similar_to	04955160	0
02156063	_derivationally_related_form	13773361	1
10215623	_derivationally_related_form	02068206	0
09114696	_has_part	09228619	1
01543731	_verb_group	03198951	0
01284444	_instance_hypernym	00223983	1
02632239	_has_part	14607521	0
09044862	_has_part	09089139	1
09157163	_derivationally_related_form	09719430	0
02380980	_hypernym	01766952	1
00223854	_member_of_domain_usage	12048772	0
02553196	_member_meronym	02618244	1
00201058	_similar_to	04648207	0
12996225	_member_meronym	13065902	1
07678193	_derivationally_related_form	02595339	0
06367373	_derivationally_related_form	01635176	1
02632239	_also_see	08726463	0
13068434	_hypernym	13066129	1
08764561	_verb_group	01084180	0
02325211	_member_meronym	02325366	1
02629410	_member_of_domain_usage	01890860	0
02554235	_derivationally_related_form	10663315	1
12048772	_similar_to	04419315	0
02574651	_member_meronym	02574910	1
12977565	_similar_to	08404895	0
06295235	_member_of_domain_usage	09269972	1
02575325	_member_of_domain_region	01883920	0
01546660	_member_meronym	01547459	1
02652979	_member_of_domain_usage	15147850	0
00288486	_derivationally_related_form	01928730	1
07842753	_synset_domain_topic_of	02343187	0
09048880	_has_part	09092497	1
10659393	_instance_hypernym	02477890	0
06295235	_member_of_domain_usage	01042764	1
10490421	_verb_group	08095647	0
00719705	_derivationally_related_form	02461063	1
02398854	_hypernym	09194357	0
02590910	_derivationally_related_form	10788852	1
09545324	_verb_group	13003254	0
00964105	_instance_hypernym	00962129	1
01885367	_instance_hypernym	03222959	0
09141526	_has_part	09388121	1
00431005	_member_of_domain_usage	07703889	0
10792335	_derivationally_related_form	01778017	1
07803992	_synset_domain_topic_of	09351647	0
02597367	_hypernym	02594250	1
09242037	_hypernym	00019128	0
02346315	_member_meronym	02346823	1
03966976	_hypernym	03976268	0
00201058	_derivationally_related_form	01972131	1
08319198	_derivationally_related_form	12968658	0
09152944	_has_part	09153710	1
12041446	_similar_to	08028148	0
02564403	_hypernym	02562315	1
13802098	_hypernym	02444103	0
13030157	_member_meronym	13030438	1
09772746	_derivationally_related_form	09678009	0
15165289	_has_part	15169136	1
01457082	_synset_domain_topic_of	13040303	0
02133704	_hypernym	02131653	1
08256968	_derivationally_related_form	08797254	0
09044862	_has_part	09075842	1
09168707	_similar_to	09229409	0
00962722	_derivationally_related_form	02583780	1
02641608	_similar_to	10102369	0
02072159	_derivationally_related_form	00914343	1
10472799	_synset_domain_topic_of	12963140	0
08932568	_has_part	08933940	1
09959258	_hypernym	02346627	0
10075529	_derivationally_related_form	06371413	1
02630052	_hypernym	02136285	0
01883513	_hypernym	01874434	1
03976268	_similar_to	03151500	0
05010801	_derivationally_related_form	02675458	1
08800676	_has_part	02102605	0
01649948	_member_meronym	01650167	1
04473432	_verb_group	01282466	0
09138935	_has_part	09320985	1
04221994	_member_of_domain_region	08726463	0
09237076	_has_part	09405169	1
10595361	_member_meronym	12977565	0
02688623	_derivationally_related_form	07802417	1
01293650	_also_see	00126721	0
04236001	_derivationally_related_form	02701445	1
09114696	_also_see	03976268	0
03200357	_hypernym	03895866	1
08396537	_member_of_domain_region	02062991	0
03718056	_hypernym	03214670	1
03928814	_member_of_domain_usage	02661317	0
01644104	_hypernym	01626134	1
03663433	_also_see	01844859	0
09044862	_has_part	09078231	1
04603872	_hypernym	02645304	0
00751389	_derivationally_related_form	00848466	1
09058071	_also_see	09292751	0
09219078	_instance_hypernym	09403734	1
02630281	_member_meronym	13040303	0
02546744	_member_meronym	02546873	1
09472597	_member_meronym	10550090	0
05043973	_derivationally_related_form	02112029	1
09907196	_member_of_domain_usage	09229409	0
01649948	_member_meronym	01652163	1
10472799	_member_meronym	02458135	0
09078231	_derivationally_related_form	02738760	1
13505987	_hypernym	00025654	0
02989893	_hypernym	02996840	1
14040846	_also_see	01285305	0
08860123	_member_of_domain_usage	10548227	1
09085441	_has_part	09154178	0
