# Supplementary material
Source: ML conference proceedings conference paper supplement (https://proceedings.neurips.cc/paper_files/paper/2021/hash/0fd600c953cde8121262e322ef09f70e-Abstract.html)
Supplement: Supplementary file 1 [file 0fd600c953cde8121262e322ef09f70e-Supplemental.zip › Supplementary_Material_Paper_8745/data/GraIL-BM_WN18RR_v3/test/test-random-sample/test6.txt]

02521241	_member_meronym	02521916	1
09370383	_also_see	13025197	0
02341974	_hypernym	02339376	1
07851054	_has_part	02509694	0
03109350	_instance_hypernym	04511002	1
04473432	_also_see	14672224	0
00053609	_derivationally_related_form	00426958	1
09408540	_member_of_domain_usage	02996249	0
01631759	_hypernym	01626134	1
02535909	_similar_to	10113362	0
08766988	_member_of_domain_region	09877443	1
02659808	_synset_domain_topic_of	02356381	0
01215137	_derivationally_related_form	06547832	1
02595339	_has_part	10489944	0
02923510	_derivationally_related_form	06234825	1
07913081	_has_part	00215683	0
08897065	_has_part	09168020	1
13042814	_member_of_domain_region	02751782	0
00014742	_hypernym	00014405	1
03663433	_member_of_domain_usage	10485440	0
00211108	_derivationally_related_form	13460568	1
09313716	_synset_domain_topic_of	10102369	0
02354781	_hypernym	02353861	1
09288946	_member_meronym	07573241	0
14894140	_hypernym	14727670	1
08782976	_member_of_domain_region	00374668	0
02441723	_member_meronym	02442845	1
02797021	_also_see	04015204	0
00963283	_derivationally_related_form	06790042	1
00918471	_member_of_domain_region	00585810	0
02832818	_derivationally_related_form	02720201	1
02652979	_member_meronym	02444103	0
01153305	_derivationally_related_form	00369194	1
02448318	_member_meronym	02437825	0
02601589	_member_meronym	02601921	1
01294791	_synset_domain_topic_of	08505573	0
12043248	_member_meronym	12043444	1
13066631	_member_of_domain_usage	09370383	0
01269360	_instance_hypernym	00223983	1
01453188	_has_part	08549480	0
00702226	_derivationally_related_form	04438304	1
14607521	_synset_domain_topic_of	02952109	0
02399000	_derivationally_related_form	01174555	1
15187077	_member_of_domain_usage	09701603	0
09044862	_has_part	09110422	1
02613960	_synset_domain_topic_of	02444103	0
02453890	_member_meronym	02457586	1
01449857	_member_meronym	02390101	0
01292727	_hypernym	01292534	1
13003254	_member_of_domain_usage	02595702	0
02528534	_member_meronym	02540255	1
03192347	_member_of_domain_region	06295235	0
02583139	_derivationally_related_form	00962129	1
09801102	_instance_hypernym	09288946	0
02927512	_derivationally_related_form	09044862	1
13044541	_derivationally_related_form	02354621	0
00492677	_also_see	02111684	1
02934168	_also_see	10311661	0
02593863	_member_meronym	02595902	1
01279120	_member_of_domain_usage	02364221	0
00210738	_derivationally_related_form	13077033	1
09452395	_synset_domain_topic_of	01282466	0
09044862	_member_of_domain_region	08122009	1
02632239	_derivationally_related_form	14607521	0
03299648	_hypernym	03214670	1
12967281	_has_part	04018399	0
04300080	_derivationally_related_form	01594362	1
01440949	_member_of_domain_usage	09125203	0
09401474	_instance_hypernym	09403734	1
10113362	_member_of_domain_region	03970363	0
09052652	_member_meronym	10802283	1
01291674	_member_of_domain_usage	02341108	0
02398854	_derivationally_related_form	10271677	1
15169421	_hypernym	10215623	0
06778102	_derivationally_related_form	00853633	1
10208189	_verb_group	12978381	0
03829085	_hypernym	02718811	1
09192973	_instance_hypernym	04438742	0
01478300	_member_meronym	01478511	1
08787466	_verb_group	08936303	0
12982723	_hypernym	11592146	1
02369012	_synset_domain_topic_of	03222959	0
01454856	_hypernym	02552171	1
08785958	_has_part	08851034	0
02870092	_derivationally_related_form	06413889	1
02363818	_similar_to	02637046	0
04186848	_derivationally_related_form	01560369	1
01144550	_member_of_domain_usage	12926480	0
06845599	_member_of_domain_usage	02705651	1
09111955	_hypernym	12926480	0
01262936	_derivationally_related_form	07738353	1
05638778	_member_of_domain_usage	02456147	0
08564307	_has_part	09109444	1
01084180	_also_see	09772746	0
01042764	_hypernym	01041968	1
02541139	_instance_hypernym	08765623	0
08860123	_member_of_domain_region	04240576	1
01295918	_member_of_domain_usage	15055633	0
09169801	_instance_hypernym	08505573	1
02499434	_derivationally_related_form	02471467	0
07450343	_derivationally_related_form	00855295	1
01942177	_member_of_domain_usage	02620033	0
12972818	_hypernym	11594676	1
01543731	_member_of_domain_region	15183802	0
14607521	_derivationally_related_form	00264875	1
07618871	_similar_to	01889520	0
15155220	_has_part	15227846	1
09418484	_also_see	09085441	0
09131654	_has_part	09244972	1
09131428	_member_of_domain_region	14487731	0
05588174	_derivationally_related_form	02884456	1
02660769	_derivationally_related_form	04221994	0
09714120	_derivationally_related_form	08953324	1
02356381	_similar_to	13752911	0
09141526	_has_part	09145083	1
02608004	_instance_hypernym	02629410	0
01639369	_member_meronym	01642671	1
09082540	_has_part	07803408	0
00626800	_also_see	00625393	1
02343187	_hypernym	08936303	0
06845599	_member_of_domain_usage	04006727	1
02073041	_member_of_domain_usage	07703889	0
08381820	_hypernym	08381636	1
07883384	_member_of_domain_region	12975982	0
07556637	_derivationally_related_form	01167188	1
02281485	_verb_group	02499434	0
00854150	_derivationally_related_form	10221312	1
01320513	_also_see	08557482	0
08136260	_hypernym	08348815	1
01457082	_derivationally_related_form	02398463	0
10181990	_hypernym	10024119	1
08765623	_member_of_domain_usage	02625418	0
08860123	_member_of_domain_region	02463990	1
09229409	_derivationally_related_form	15298507	0
06845599	_member_of_domain_usage	03771066	1
09678009	_member_of_domain_usage	01645278	0
06621447	_derivationally_related_form	02797021	1
02535909	_instance_hypernym	02411427	0
12992464	_member_meronym	12975207	1
01883920	_similar_to	00252710	0
09682291	_derivationally_related_form	02923510	1
02563497	_derivationally_related_form	02424695	0
02424085	_hypernym	02419796	1
07722485	_member_of_domain_usage	01874784	0
09119277	_has_part	09370383	1
02637046	_derivationally_related_form	02458356	0
08860123	_member_of_domain_region	07722485	1
01319874	_member_of_domain_usage	09719430	0
14487731	_derivationally_related_form	00492706	1
15055633	_also_see	04115456	0
04762355	_derivationally_related_form	00625393	1
14487731	_instance_hypernym	09100982	0
13016457	_member_meronym	13001743	1
13533470	_synset_domain_topic_of	09736633	0
01303582	_instance_hypernym	00962722	1
07851054	_hypernym	14411243	0
02536165	_has_part	07796165	1
07883384	_similar_to	07653394	0
02601344	_has_part	07784367	1
01273263	_hypernym	02458356	0
08416652	_hypernym	08251877	1
09083390	_has_part	02367993	0
00963283	_derivationally_related_form	00963241	1
02355477	_also_see	01274909	0
02176747	_hypernym	02176261	1
02529111	_hypernym	12964572	0
06214580	_derivationally_related_form	10619176	1
09134999	_instance_hypernym	03074922	0
07689217	_hypernym	07689003	1
15147850	_similar_to	09084196	0
12970379	_member_meronym	12970560	1
08319198	_has_part	01475421	0
10244913	_hypernym	09770949	1
01634092	_member_meronym	09243209	0
08780881	_member_of_domain_region	07036862	1
02174461	_instance_hypernym	02581957	0
02066450	_member_meronym	02068735	1
02513742	_synset_domain_topic_of	08936303	0
09117351	_has_part	09123809	1
10659393	_member_of_domain_usage	01547001	0
04352070	_hypernym	02716205	1
03352961	_instance_hypernym	03352961	0
13007417	_hypernym	12998815	1
00126721	_has_part	02612393	0
03854065	_hypernym	04586932	1
09731906	_similar_to	04535524	0
13002433	_member_meronym	13003522	1
04648207	_member_of_domain_region	02483224	0
02655523	_hypernym	02652668	1
12972414	_member_of_domain_region	09084196	0
01245813	_derivationally_related_form	01078050	1
13505987	_hypernym	01245637	0
13077295	_derivationally_related_form	00210738	1
01883920	_member_meronym	04535524	0
08615638	_derivationally_related_form	01934427	1
02134084	_has_part	06481156	0
08860123	_member_of_domain_region	07696527	1
09692624	_has_part	10595361	0
09078231	_member_of_domain_region	06938493	1
09124039	_member_of_domain_usage	09867154	0
09048880	_has_part	09147964	1
08774546	_has_part	02328270	0
08365855	_derivationally_related_form	09945603	1
04955160	_member_of_domain_region	04947628	0
08505573	_hypernym	07941945	1
02553196	_similar_to	09693372	0
01523823	_derivationally_related_form	01244593	1
08764561	_has_part	00088713	0
00366858	_derivationally_related_form	13572436	1
02483224	_member_of_domain_region	06195698	0
01273016	_hypernym	01531742	1
08811982	_member_of_domain_usage	02623170	0
14994328	_derivationally_related_form	00266586	1
15146004	_member_meronym	02390101	0
09134386	_has_part	09192708	1
04443918	_synset_domain_topic_of	03918297	0
02353844	_derivationally_related_form	03427296	1
02431785	_derivationally_related_form	07913081	0
12992464	_member_meronym	12992868	1
10550090	_also_see	10215623	0
01953810	_derivationally_related_form	04473432	1
02630281	_member_of_domain_usage	13875185	0
09071690	_has_part	09074431	1
02582591	_similar_to	04648207	0
02635013	_member_meronym	02635154	1
00233614	_has_part	14894140	0
09117351	_member_of_domain_region	01294127	1
03222959	_has_part	06310945	0
02416104	_hypernym	02414578	1
13533470	_derivationally_related_form	01128071	0
15147850	_has_part	15146004	1
09348460	_instance_hypernym	02331479	0
02456962	_hypernym	02453611	1
00025654	_instance_hypernym	00190999	0
13023292	_member_meronym	13024012	1
01293167	_member_meronym	13533470	0
02470451	_member_meronym	02483915	1
02398463	_has_part	02398854	0
02601589	_member_meronym	02601767	1
00088713	_similar_to	12967281	0
09150448	_instance_hypernym	08672738	1
04443918	_verb_group	03769967	0
06845599	_member_of_domain_usage	03748456	1
07792470	_derivationally_related_form	02616572	0
03599761	_derivationally_related_form	02461063	1
02062991	_has_part	09332976	0
02623170	_member_meronym	02623868	1
04349701	_member_of_domain_region	01646528	0
08894456	_has_part	09430771	1
02389346	_instance_hypernym	07634901	0
09416076	_hypernym	00019128	1
02156063	_derivationally_related_form	13074084	0
00963283	_derivationally_related_form	04879658	1
02499434	_verb_group	08256968	0
02131418	_member_meronym	02133902	1
09498497	_derivationally_related_form	01291674	0
02509197	_hypernym	02507649	1
01440949	_member_of_domain_usage	00858377	0
01448291	_hypernym	01446589	1
02509197	_instance_hypernym	08095647	0
14894140	_derivationally_related_form	02192383	1
02415577	_similar_to	01291674	0
06295235	_member_of_domain_usage	03443912	1
07649463	_synset_domain_topic_of	09545324	0
09139380	_instance_hypernym	08665504	1
08790953	_member_of_domain_usage	01474283	0
02602405	_hypernym	02552171	1
01475421	_has_part	02652979	0
03457686	_hypernym	03461385	1
02331175	_verb_group	03192347	0
02484975	_hypernym	02484473	1
02447896	_instance_hypernym	00651954	0
02449921	_member_meronym	02450034	1
07803992	_instance_hypernym	02595339	0
13024967	_member_meronym	13025647	1
06767777	_has_part	06883073	0
06845599	_member_of_domain_usage	14753808	1
09648743	_member_of_domain_region	13319512	0
02112891	_similar_to	02111684	1
08800676	_similar_to	02653497	0
00624263	_derivationally_related_form	06372095	1
13041725	_member_meronym	01050896	0
01642671	_member_meronym	01643092	1
02423465	_member_of_domain_region	07913081	0
13052931	_hypernym	13049953	1
00513401	_member_of_domain_region	02471467	0
08953151	_has_part	08953324	1
03098140	_similar_to	02457408	0
02797021	_derivationally_related_form	06593803	1
00842692	_verb_group	09134999	0
00902932	_derivationally_related_form	06630627	1
06630017	_hypernym	08028148	0
09886807	_hypernym	09700492	1
07450549	_derivationally_related_form	03021531	0
02548689	_hypernym	02552171	1
00283911	_has_part	02631238	0
13516176	_derivationally_related_form	00210738	1
10641223	_derivationally_related_form	00089657	0
07803408	_hypernym	07803545	1
09155986	_member_of_domain_region	00485711	0
02400139	_member_meronym	02423787	1
02389346	_verb_group	10069645	0
06845599	_member_of_domain_usage	03818843	1
02343487	_verb_group	09930876	0
08860123	_member_of_domain_region	08547300	1
03928814	_derivationally_related_form	04648207	0
02064154	_member_meronym	02064608	1
09772746	_derivationally_related_form	10485440	0
08174398	_member_meronym	09044862	1
09332976	_similar_to	14604959	0
02007417	_derivationally_related_form	00281132	1
01446760	_member_meronym	03151500	0
02465414	_derivationally_related_form	01186428	1
07703889	_hypernym	09356639	0
08999482	_member_of_domain_region	09327077	1
09772746	_instance_hypernym	13040303	0
08860123	_member_of_domain_region	13752172	1
00223983	_member_of_domain_region	05273684	0
02396427	_hypernym	02395003	1
07803408	_hypernym	08787695	0
02395244	_member_meronym	02396427	1
01277755	_synset_domain_topic_of	02393300	0
01552956	_member_meronym	01553142	1
02134084	_verb_group	01278232	0
04112752	_derivationally_related_form	00103317	1
02660769	_member_meronym	02354621	0
08014860	_instance_hypernym	08392137	1
03325769	_also_see	09313716	0
02011810	_derivationally_related_form	01778568	1
01631759	_also_see	09233284	0
06960298	_derivationally_related_form	02957823	1
00918471	_member_meronym	04018399	0
02658944	_member_meronym	02659176	1
02571486	_hypernym	09343422	0
00853633	_derivationally_related_form	00431005	1
02448318	_member_of_domain_usage	04305323	0
13010219	_hypernym	11590783	1
06369829	_derivationally_related_form	02456147	0
12060546	_hypernym	12041446	1
03612134	_instance_hypernym	14599168	0
02329093	_member_meronym	02329401	1
14299336	_verb_group	10595361	0
02535909	_member_meronym	02536864	1
14299336	_hypernym	08726463	0
02354950	_member_meronym	02355711	1
12082593	_instance_hypernym	01890718	0
02400139	_member_meronym	02407959	1
13802098	_verb_group	06369829	0
10082146	_derivationally_related_form	00991838	1
03470222	_member_of_domain_region	09288946	0
08723006	_member_of_domain_region	05915584	1
01349493	_hypernym	09397391	0
09721244	_derivationally_related_form	08961402	1
01446760	_has_part	02540670	0
06295235	_member_of_domain_usage	07140348	1
08122141	_similar_to	06369829	0
02660769	_member_meronym	02661765	1
03966976	_synset_domain_topic_of	01086945	0
02366702	_member_meronym	02366825	1
02630468	_member_of_domain_usage	02398463	0
01244593	_derivationally_related_form	00038365	1
08811982	_verb_group	12041446	0
09095023	_has_part	09095751	1
08804487	_verb_group	08082236	0
04051825	_derivationally_related_form	01130607	1
02369012	_member_of_domain_region	01454856	0
02672859	_derivationally_related_form	13529616	1
01475421	_synset_domain_topic_of	01137696	0
14883206	_derivationally_related_form	00443670	1
12979129	_member_of_domain_usage	09268927	0
09095751	_has_part	03009477	1
01137696	_instance_hypernym	08339454	0
00902932	_hypernym	00897241	1
02720725	_has_part	07635155	0
12998349	_member_meronym	13016457	1
12977565	_member_meronym	05949937	0
03568653	_hypernym	03828465	1
09155986	_member_of_domain_region	02558350	0
08723006	_has_part	09327881	1
09144117	_synset_domain_topic_of	02457408	0
09051235	_has_part	09075842	1
02616572	_member_of_domain_region	09023321	0
08860123	_member_of_domain_region	08555333	1
01634092	_similar_to	09243209	0
00159899	_derivationally_related_form	00880227	1
07883384	_also_see	02499700	0
12963796	_member_meronym	12965209	1
01449586	_derivationally_related_form	03976268	0
01604251	_derivationally_related_form	00299680	1
02630468	_member_of_domain_usage	01084180	0
13011856	_member_meronym	13012030	1
10460033	_similar_to	03962525	0
02716866	_hypernym	02716205	1
04018399	_synset_domain_topic_of	01084180	0
08766988	_has_part	08775784	1
02629410	_also_see	03186005	0
00491689	_derivationally_related_form	09440186	1
02354621	_member_of_domain_region	02354621	0
09095023	_has_part	09306031	1
02134084	_member_of_domain_usage	09348460	0
01471070	_member_meronym	01626134	1
12062227	_verb_group	01295918	0
00897241	_derivationally_related_form	06630017	1
02456147	_similar_to	08122141	0
12979630	_hypernym	11592146	1
00495808	_instance_hypernym	02967626	0
01542207	_verb_group	01541579	1
04115456	_derivationally_related_form	12078596	0
01503061	_has_part	01896031	1
01439121	_instance_hypernym	01646528	0
02640857	_hypernym	02640242	1
01449857	_has_part	06295235	0
14487731	_derivationally_related_form	00493259	1
06366581	_has_part	08785958	0
02074915	_member_meronym	02083038	1
02658531	_instance_hypernym	13076181	0
01645278	_hypernym	01626600	1
02121234	_has_part	12063414	0
13065215	_member_meronym	13065514	1
10102369	_derivationally_related_form	02499434	0
00230172	_derivationally_related_form	02156546	1
01285305	_instance_hypernym	02571486	0
08801678	_has_part	08804962	1
02896789	_member_of_domain_usage	09070487	0
02534734	_has_part	07795751	1
01086945	_instance_hypernym	01876180	0
02117900	_hypernym	02117135	1
02637046	_instance_hypernym	02328270	0
04412727	_hypernym	02720201	1
02513742	_synset_domain_topic_of	13030438	0
00853633	_derivationally_related_form	10221312	1
02411427	_verb_group	01650167	0
01015996	_derivationally_related_form	10366779	1
08250635	_member_of_domain_usage	14604959	0
02648313	_hypernym	02647660	1
01547001	_has_part	02530421	0
14996020	_derivationally_related_form	01245637	1
09693372	_has_part	06366581	0
04879658	_derivationally_related_form	00963283	1
09242037	_member_meronym	00513401	0
09075842	_has_part	09076675	1
01277288	_similar_to	03198951	0
02641825	_member_meronym	02646377	1
02456147	_instance_hypernym	07450549	0
15155220	_has_part	15165490	1
05407119	_member_of_domain_usage	01245637	0
14599641	_derivationally_related_form	00264875	1
04947628	_member_of_domain_region	03586631	0
10338094	_derivationally_related_form	02390101	1
12967281	_synset_domain_topic_of	14607521	0
02551824	_member_meronym	02552171	1
08764561	_has_part	00459114	0
06845599	_member_of_domain_usage	04407007	1
07631212	_verb_group	03380134	0
01299735	_has_part	01295918	1
01634092	_derivationally_related_form	12063414	0
01647803	_member_meronym	01648001	1
14705533	_similar_to	07927197	0
08860123	_member_of_domain_region	04314522	1
03769967	_verb_group	02640626	0
08766988	_member_of_domain_region	09222742	1
02156063	_has_part	02156063	0
02136271	_derivationally_related_form	04069276	1
01449586	_verb_group	03519981	0
04010348	_hypernym	02720725	1
13030438	_verb_group	03098140	0
08860123	_member_of_domain_region	08504851	1
00223854	_synset_domain_topic_of	02415577	0
02379753	_derivationally_related_form	00212205	1
10311661	_member_of_domain_region	02967626	0
04733204	_derivationally_related_form	02262542	1
00233614	_verb_group	01883920	0
13060689	_member_meronym	13060912	1
07450549	_instance_hypernym	06369829	0
04473432	_derivationally_related_form	01953810	1
02423465	_instance_hypernym	14487184	0
07229747	_hypernym	07229530	1
15169421	_has_part	04221994	0
08780881	_has_part	08783286	1
10055847	_derivationally_related_form	09288946	0
14686913	_derivationally_related_form	00442267	1
09051726	_has_part	02174461	0
13054211	_member_meronym	13055009	1
07703889	_synset_domain_topic_of	02609169	0
12039743	_member_meronym	12045352	1
02393300	_hypernym	07703889	0
01915131	_derivationally_related_form	02898711	1
00458754	_member_of_domain_region	02616572	0
08305942	_hypernym	08168978	1
00052146	_member_meronym	09144117	0
08860123	_member_of_domain_region	03702719	1
09192973	_member_of_domain_region	08936303	0
07673397	_hypernym	07672135	1
01644900	_also_see	02328270	0
03519578	_hypernym	03519981	1
01890860	_also_see	03534890	0
01640383	_member_meronym	01640567	1
09481285	_derivationally_related_form	02606590	0
02641608	_member_meronym	02651846	1
00215683	_member_of_domain_usage	00223983	0
01465994	_member_meronym	01467986	1
00991838	_member_of_domain_region	07678193	0
03467517	_hypernym	04338517	1
01873310	_member_of_domain_usage	01466828	0
13030852	_hypernym	13028611	1
08256968	_instance_hypernym	04648207	0
02412440	_derivationally_related_form	00058265	1
00223854	_similar_to	02137549	0
08174398	_member_meronym	08780881	1
08787695	_similar_to	02448318	0
02854739	_hypernym	04508489	1
03198951	_synset_domain_topic_of	10485440	0
02389346	_verb_group	02389592	1
13066129	_member_of_domain_usage	09233284	0
14807929	_hypernym	05407119	1
03757925	_member_of_domain_region	01449586	0
12985236	_hypernym	11592146	1
03586631	_verb_group	02513742	0
14859622	_hypernym	14961512	1
09418484	_has_part	01440949	0
02505809	_member_meronym	02505998	1
07803408	_hypernym	02967626	0
06871384	_derivationally_related_form	01050896	1
03198951	_derivationally_related_form	13533470	0
13016457	_member_meronym	13232515	1
01873310	_derivationally_related_form	02571810	0
02659808	_hypernym	02658079	1
02477890	_member_of_domain_region	02068206	0
09070793	_has_part	02956500	1
03928814	_synset_domain_topic_of	02411427	0
00432839	_derivationally_related_form	14489113	1
02608004	_synset_domain_topic_of	07803992	0
09368224	_derivationally_related_form	08641113	1
09348460	_instance_hypernym	02581957	0
00680485	_derivationally_related_form	06211078	1
07792470	_similar_to	02351870	0
02340186	_hypernym	02339922	1
02625418	_verb_group	13456715	0
02175958	_derivationally_related_form	04989657	1
02499434	_also_see	06349220	0
00086835	_derivationally_related_form	00824054	1
14411243	_verb_group	00052146	0
13000372	_member_meronym	13005568	1
07649463	_instance_hypernym	02509197	0
09117351	_has_part	09192973	1
02721538	_member_of_domain_region	13026146	0
09761068	_derivationally_related_form	02470685	1
00233614	_similar_to	01086945	0
02399000	_hypernym	02394477	1
00495808	_has_part	07803408	0
13753585	_hypernym	13745420	1
08800676	_has_part	09122968	0
10621514	_derivationally_related_form	00849294	1
02967626	_hypernym	02156063	0
09095023	_member_of_domain_region	01283935	1
12062227	_member_of_domain_usage	04053995	0
08860123	_member_of_domain_region	09351547	1
03654086	_synset_domain_topic_of	09064594	0
00772813	_derivationally_related_form	00963283	1
00299680	_also_see	08579487	0
09284015	_derivationally_related_form	01567888	1
02081282	_similar_to	01137696	0
02071294	_hypernym	02068974	1
02389346	_also_see	09244972	0
07622261	_derivationally_related_form	01265740	1
00329819	_member_of_domain_usage	00329819	0
08095647	_member_meronym	08096474	1
13026146	_member_of_domain_usage	00294190	0
00410406	_derivationally_related_form	09738708	1
01213614	_member_meronym	10476671	0
02549533	_member_meronym	02549796	1
03380134	_member_of_domain_usage	02621721	0
06845599	_member_of_domain_usage	14753414	1
01194238	_hypernym	15055633	0
06695862	_derivationally_related_form	00880227	1
00089657	_member_of_domain_region	13030438	0
00883635	_hypernym	00883226	1
03251766	_similar_to	02281485	0
02649218	_hypernym	02648625	1
00089657	_has_part	13030438	0
01645634	_hypernym	01626134	1
03970363	_member_of_domain_region	02355477	0
14836468	_hypernym	14732946	1
06929742	_derivationally_related_form	09023321	0
09709001	_hypernym	09708405	1
02509197	_member_of_domain_usage	08935212	0
08554440	_hypernym	08553535	1
00855295	_member_of_domain_usage	09194357	0
13077033	_hypernym	12992868	1
08504594	_member_meronym	09356639	0
13043516	_hypernym	11590783	1
00981369	_hypernym	09682803	0
13575433	_derivationally_related_form	00458754	1
08082236	_synset_domain_topic_of	01844859	0
01398941	_derivationally_related_form	04049405	1
02366825	_instance_hypernym	13533470	0
02528534	_member_meronym	02541431	1
13529616	_member_meronym	09313716	0
08801678	_member_of_domain_region	06964247	1
09945603	_synset_domain_topic_of	02896789	0
08368308	_derivationally_related_form	02875499	1
09701603	_hypernym	13066129	0
02425086	_hypernym	02419796	1
02625418	_has_part	02967626	0
01640383	_member_meronym	01640846	1
09233284	_member_meronym	08349548	0
08563627	_has_part	09057311	1
07752264	_has_part	08122141	0
08801099	_member_meronym	09696124	1
04947628	_instance_hypernym	09058071	0
01190840	_derivationally_related_form	07891726	1
08774546	_derivationally_related_form	01896031	0
09301249	_instance_hypernym	09241247	1
02081282	_also_see	01213614	0
01883212	_member_meronym	01883513	1
14607521	_derivationally_related_form	10550090	0
09071690	_has_part	09378014	1
12054902	_has_part	01743531	0
08342039	_hypernym	08339454	1
03813834	_hypernym	12073007	0
04353016	_hypernym	04352070	1
14411243	_synset_domain_topic_of	08851034	0
13070003	_hypernym	11590783	1
09701603	_also_see	02612393	0
02607630	_member_meronym	02609466	1
02751782	_member_of_domain_region	07450549	0
13039870	_member_meronym	13040108	1
01279120	_member_meronym	13024967	0
02535349	_member_meronym	02535537	1
02354621	_hypernym	02637046	0
00105778	_derivationally_related_form	09930876	1
02174461	_verb_group	12072210	0
09682803	_derivationally_related_form	08095647	1
00800121	_derivationally_related_form	01653975	0
01890860	_hypernym	01889520	1
02509694	_verb_group	07752264	0
02936020	_derivationally_related_form	06321702	1
01928390	_similar_to	08404895	0
15169248	_hypernym	15228378	1
07634901	_member_of_domain_usage	02631238	0
03933529	_derivationally_related_form	02331175	1
00052146	_similar_to	02062991	0
10272171	_hypernym	09886010	1
03093184	_derivationally_related_form	03644378	0
14599168	_hypernym	14739360	1
09801102	_synset_domain_topic_of	02368280	0
13060451	_member_meronym	13062112	1
02281485	_derivationally_related_form	00651954	0
00252710	_derivationally_related_form	15147850	1
02601921	_member_of_domain_usage	02485451	0
02521241	_member_meronym	02525543	1
02896789	_has_part	09356639	0
10146927	_derivationally_related_form	00899597	1
14299336	_member_of_domain_region	03663433	0
05951969	_derivationally_related_form	10306279	1
13030438	_synset_domain_topic_of	09058071	0
03315644	_derivationally_related_form	01271189	1
07649463	_derivationally_related_form	04438742	0
02435853	_hypernym	02399000	1
15170786	_has_part	08789605	0
06845599	_member_of_domain_usage	03295357	1
10659393	_synset_domain_topic_of	08800676	0
04764741	_derivationally_related_form	00485711	1
10472799	_hypernym	00329819	0
08723006	_member_of_domain_region	08321469	1
01304121	_verb_group	03093574	0
09052314	_instance_hypernym	09044862	1
12061104	_also_see	00125633	0
12083339	_member_meronym	12083591	1
10224098	_member_of_domain_usage	02535909	0
09060768	_has_part	09358096	1
05345581	_hypernym	01303582	0
09044862	_has_part	09067277	1
01743531	_has_part	03918297	0
06214744	_derivationally_related_form	00408852	1
02571486	_hypernym	10102369	0
13037124	_hypernym	11592146	1
02354621	_member_of_domain_region	10215623	0
00713250	_derivationally_related_form	01266895	1
00585810	_similar_to	12975608	0
06845599	_member_of_domain_usage	14747168	1
01440949	_verb_group	03691459	0
08801678	_member_of_domain_region	08541609	1
13875185	_member_meronym	00223854	0
13298935	_hypernym	13298701	1
14487184	_verb_group	15298507	0
02409202	_hypernym	02407959	1
02658531	_similar_to	13076181	0
08860123	_member_of_domain_region	06699225	1
12975982	_member_of_domain_region	09111955	0
00105778	_derivationally_related_form	00427580	1
01644900	_similar_to	03918297	0
07858595	_derivationally_related_form	02195470	1
01882125	_member_of_domain_usage	13066631	0
13015229	_hypernym	11592146	1
13042814	_verb_group	09084196	0
08174398	_member_meronym	09039411	1
10412910	_member_of_domain_usage	04728376	0
00419137	_derivationally_related_form	07443210	1
02652979	_instance_hypernym	02612393	0
06845599	_member_of_domain_usage	03155334	1
12968658	_member_meronym	07913081	0
05716744	_derivationally_related_form	02196690	1
15171008	_has_part	10311661	0
02420789	_derivationally_related_form	00719705	1
10069645	_member_meronym	02609169	0
01468238	_hypernym	01466257	1
14599168	_similar_to	15200314	0
00575970	_derivationally_related_form	15055633	1
05345581	_similar_to	13881512	0
09232165	_instance_hypernym	09475292	1
00252710	_derivationally_related_form	00991838	0
08124971	_has_part	08125722	1
01635343	_has_part	02641608	0
12998349	_member_meronym	13074084	1
08404895	_instance_hypernym	08214272	0
08641113	_derivationally_related_form	10352299	1
09076982	_instance_hypernym	02503313	0
06201908	_derivationally_related_form	00680346	1
00089657	_hypernym	09091398	0
00880227	_derivationally_related_form	06695579	1
09268927	_also_see	01915365	0
08984788	_has_part	09453566	1
00038687	_instance_hypernym	03470222	0
06845599	_member_of_domain_usage	04006953	1
02665282	_verb_group	00025654	0
02066707	_hypernym	02062744	1
01874784	_has_part	04987620	0
08929922	_member_of_domain_region	13753274	1
01324799	_instance_hypernym	01646528	0
01126846	_hypernym	01127411	1
03813834	_member_of_domain_region	01896031	0
06413889	_derivationally_related_form	07009946	1
14040846	_synset_domain_topic_of	00513401	0
12968408	_member_meronym	12970379	1
04299699	_synset_domain_topic_of	08339454	0
09127461	_instance_hypernym	09399592	1
02394822	_derivationally_related_form	10069645	0
00883226	_derivationally_related_form	07230089	1
07851054	_member_of_domain_region	14752057	0
00135285	_derivationally_related_form	06372095	1
03970363	_member_of_domain_usage	02174461	0
10490421	_hypernym	09841188	1
13456715	_similar_to	01278232	0
04051068	_hypernym	02673637	1
09719430	_similar_to	09453288	0
02340930	_hypernym	02339376	1
02483224	_verb_group	00019128	0
08929922	_member_of_domain_region	06964901	1
02415577	_member_of_domain_usage	07803408	0
02593863	_member_meronym	02596888	1
02424695	_hypernym	07653394	0
06845599	_member_of_domain_usage	04476633	1
01696648	_instance_hypernym	07913081	0
09119277	_has_part	04604009	1
00842692	_member_meronym	02575325	0
08674970	_derivationally_related_form	02468965	1
04993882	_synset_domain_topic_of	04441282	0
00105554	_derivationally_related_form	00431005	1
09244972	_similar_to	12061104	0
09038990	_has_part	09719430	1
02355477	_member_of_domain_usage	03325769	0
09243405	_instance_hypernym	09215664	1
00223854	_instance_hypernym	10485440	0
15159583	_derivationally_related_form	00734927	1
09343422	_has_part	02621721	0
02633677	_hypernym	02632989	1
09058071	_also_see	09157021	0
00485711	_derivationally_related_form	04764741	1
07800487	_hypernym	09125203	0
01896031	_has_part	01897991	1
02471467	_also_see	04603872	0
01696135	_derivationally_related_form	04694809	1
02952109	_also_see	00855295	0
03670622	_hypernym	02716866	1
02888000	_member_of_domain_region	02411427	0
09087599	_has_part	09368479	1
03093574	_similar_to	08851034	0
08149781	_hypernym	08081668	1
02352390	_derivationally_related_form	03970363	0
09260466	_hypernym	09416076	1
00918471	_member_of_domain_region	10550090	0
13024763	_member_meronym	13024967	1
00827379	_instance_hypernym	00038687	0
02534352	_member_meronym	02535349	1
09134999	_derivationally_related_form	07678193	0
01891438	_member_meronym	01891633	1
08404895	_derivationally_related_form	02608004	0
03612814	_hypernym	03990474	1
09498497	_synset_domain_topic_of	10470779	0
09044862	_has_part	09111366	1
09332976	_member_of_domain_region	01293167	0
03662016	_hypernym	03681148	1
07792470	_also_see	02411705	0
02396796	_hypernym	02395003	1
02431785	_also_see	01696648	0
09082540	_has_part	09084483	1
09682803	_hypernym	12048231	0
10318892	_derivationally_related_form	01743531	1
09348460	_instance_hypernym	02529111	0
12978969	_hypernym	11590783	1
08095647	_member_meronym	01453188	0
06845599	_member_of_domain_usage	04443588	1
09023321	_instance_hypernym	02609169	0
02989475	_hypernym	02996840	1
02351870	_hypernym	07883384	0
06344461	_hypernym	06343971	1
01293650	_member_of_domain_region	02477890	0
01874928	_hypernym	01874434	1
15183802	_similar_to	07450549	0
15228378	_hypernym	15129927	1
09093472	_instance_hypernym	04497962	0
10352299	_derivationally_related_form	08641113	1
02575325	_similar_to	01319874	0
02068735	_member_meronym	02069569	1
13753740	_synset_domain_topic_of	03869222	0
02324045	_has_part	02158739	1
02499434	_also_see	10113362	0
02356108	_member_meronym	02355477	1
02896789	_instance_hypernym	09702134	0
03362393	_hypernym	02715941	1
01446760	_synset_domain_topic_of	10489944	0
05681117	_has_part	05768553	1
09292751	_hypernym	08256968	0
07427337	_derivationally_related_form	00223500	1
01844859	_verb_group	01885367	0
10582154	_derivationally_related_form	02540670	1
13044541	_instance_hypernym	12072210	0
09078231	_member_of_domain_region	02581957	1
12975608	_member_meronym	03222959	0
02507337	_member_meronym	02509694	1
02499700	_similar_to	12062227	0
10268299	_derivationally_related_form	02614387	1
13753740	_also_see	03222959	0
07443210	_derivationally_related_form	00441212	1
13265904	_has_part	13044541	0
08780881	_member_of_domain_region	09542697	1
02363818	_hypernym	00795161	0
02015168	_derivationally_related_form	00057306	1
01885367	_member_of_domain_region	09478355	0
09039411	_member_of_domain_region	06340047	1
01650167	_also_see	09945603	0
02430191	_derivationally_related_form	01081456	1
10472799	_member_meronym	03151500	0
06845599	_member_of_domain_usage	03588668	1
02174461	_instance_hypernym	02073041	0
06295235	_member_of_domain_usage	09212572	1
10641223	_member_of_domain_usage	00855295	0
02335349	_member_meronym	02338029	1
09051726	_member_of_domain_usage	08769645	0
13007770	_hypernym	11592146	1
09268927	_instance_hypernym	09122968	0
07679356	_derivationally_related_form	01337653	1
00842692	_verb_group	06263609	0
02331309	_hypernym	02331046	1
01304121	_derivationally_related_form	01293167	0
00680346	_hypernym	00680145	1
05638778	_member_of_domain_region	00356367	0
08986066	_instance_hypernym	08691669	1
01465713	_has_part	00201058	0
11517494	_derivationally_related_form	00073584	1
02343772	_also_see	10595361	0
09067277	_has_part	09373716	1
01164874	_member_of_domain_region	02509694	0
00842692	_derivationally_related_form	01186428	1
02062991	_derivationally_related_form	02369012	0
00492677	_derivationally_related_form	08615374	1
08579487	_derivationally_related_form	02623170	0
13005329	_hypernym	12998815	1
09144117	_member_of_domain_usage	07649463	0
07653394	_hypernym	07649854	1
02354621	_has_part	09472597	0
10382825	_derivationally_related_form	03854065	1
12062227	_instance_hypernym	01137696	0
02652668	_hypernym	02552171	1
06349220	_hypernym	00513401	0
00088725	_derivationally_related_form	01215137	1
13005329	_member_of_domain_region	08504594	0
02453890	_member_meronym	02456776	1
01884348	_instance_hypernym	01457082	0
09400667	_instance_hypernym	09440186	1
04603872	_verb_group	04760771	0
01158572	_derivationally_related_form	13451804	1
13752911	_similar_to	02659808	0
07779747	_hypernym	07775905	1
12063414	_derivationally_related_form	01245637	0
01653026	_hypernym	01639765	1
00201058	_similar_to	01889520	0
02358091	_hypernym	02355227	1
02629410	_derivationally_related_form	02934168	0
04947628	_hypernym	04947186	1
06369829	_hypernym	00052146	0
09075842	_has_part	09378014	1
01650167	_synset_domain_topic_of	01277755	0
08860123	_member_of_domain_region	07450343	1
02346627	_instance_hypernym	13003254	0
00040188	_derivationally_related_form	00256961	1
01320513	_has_part	08136260	0
02411705	_has_part	02439568	1
02535909	_verb_group	08504594	0
09044862	_has_part	09059274	1
03352961	_derivationally_related_form	12963140	0
00991838	_derivationally_related_form	14864360	1
13066129	_also_see	09154178	0
02510455	_hypernym	02507649	1
02503313	_hypernym	12978381	0
02546075	_derivationally_related_form	10183757	1
09089782	_derivationally_related_form	09332976	0
02553196	_member_meronym	02621721	1
03233423	_member_of_domain_region	09770949	0
00191517	_derivationally_related_form	13496771	1
07634901	_derivationally_related_form	12926480	0
02400139	_member_meronym	02409702	1
02415577	_member_meronym	00855295	0
14841267	_derivationally_related_form	02112891	1
01213614	_also_see	09111955	0
01167981	_derivationally_related_form	08253815	1
01241594	_also_see	10102369	0
00492677	_derivationally_related_form	04764741	1
10102369	_derivationally_related_form	12082593	0
02341475	_hypernym	02339376	1
05273684	_derivationally_related_form	09233284	0
10162354	_derivationally_related_form	03497657	1
09702134	_similar_to	04760771	0
02130308	_hypernym	02127808	1
06195698	_has_part	10102369	0
01141938	_derivationally_related_form	02062744	1
09192973	_synset_domain_topic_of	02513742	0
07590611	_hypernym	07588947	1
09125203	_derivationally_related_form	02621721	0
02380009	_derivationally_related_form	10525617	1
02645304	_instance_hypernym	02281485	0
01888520	_member_meronym	01893535	1
13753740	_similar_to	03918297	0
01560369	_derivationally_related_form	00360242	1
04603872	_instance_hypernym	08504594	0
01648494	_member_meronym	01648620	1
14599168	_member_of_domain_usage	02415577	0
09194357	_has_part	09357847	1
10641223	_derivationally_related_form	06310945	0
12967776	_hypernym	11590783	1
06369829	_member_of_domain_region	02136285	0
08932568	_has_part	08933621	1
12968658	_synset_domain_topic_of	02665282	0
01445027	_derivationally_related_form	14757547	1
02136285	_similar_to	02509197	0
02457756	_member_meronym	02457945	1
09313716	_similar_to	02650928	0
13660178	_derivationally_related_form	00491689	1
02599207	_similar_to	12972414	0
01130607	_derivationally_related_form	04051825	1
13753740	_also_see	04418644	0
06845599	_member_of_domain_usage	15071684	1
03663433	_member_of_domain_usage	02630468	0
02602212	_derivationally_related_form	07515974	1
02377480	_verb_group	00223854	0
03497657	_has_part	02902079	1
02653497	_member_of_domain_usage	02682424	0
09103943	_has_part	09459557	1
09678009	_also_see	10485440	0
00161739	_derivationally_related_form	01696648	1
09168707	_similar_to	12968658	0
08133189	_hypernym	08337324	1
13030438	_hypernym	13030438	0
00799537	_derivationally_related_form	02414473	1
08082236	_verb_group	03654086	0
13205482	_member_meronym	13210006	1
01696648	_also_see	02612393	0
08860123	_member_of_domain_region	04441528	1
08804487	_similar_to	02398463	0
09109444	_has_part	09109882	1
09064594	_instance_hypernym	12975982	0
01305361	_hypernym	02085742	1
00419375	_has_part	00856847	0
02336011	_hypernym	02329401	1
03661861	_member_meronym	02431785	0
03970363	_hypernym	02896442	1
02645304	_derivationally_related_form	08797254	0
03061081	_derivationally_related_form	05996646	1
00495808	_member_meronym	07573241	0
13486270	_derivationally_related_form	00442267	1
02558350	_has_part	01449586	0
01382818	_derivationally_related_form	01639765	1
01896031	_derivationally_related_form	02134084	0
02673480	_hypernym	02832168	1
02124623	_verb_group	04242704	0
08860123	_member_of_domain_region	07635155	1
02444103	_hypernym	05345581	0
13006377	_hypernym	11592146	1
03325769	_synset_domain_topic_of	02281485	0
01075117	_hypernym	00954086	1
02952109	_derivationally_related_form	01324799	0
02784732	_derivationally_related_form	01273263	1
00458754	_verb_group	03612378	0
06295235	_member_of_domain_usage	03885028	1
09064594	_verb_group	10659393	0
00089154	_derivationally_related_form	14283632	1
09408540	_similar_to	04115456	0
02907985	_instance_hypernym	04511002	1
08726463	_member_meronym	01915365	0
15058163	_hypernym	15057744	1
02637046	_derivationally_related_form	15165490	0
08910668	_has_part	09237404	1
08404895	_member_of_domain_usage	10595361	0
14276936	_hypernym	14070360	1
01442591	_member_meronym	09066948	0
08214470	_hypernym	08190754	1
09111955	_member_of_domain_region	12062227	0
13038944	_member_meronym	13046285	1
02423465	_also_see	12968658	0
00366858	_derivationally_related_form	15055633	1
09545324	_verb_group	08787695	0
08860123	_member_of_domain_region	13359941	1
02631238	_verb_group	02563497	0
02652979	_member_meronym	02653359	1
07927197	_hypernym	01873310	0
13029946	_member_meronym	13030157	1
08789605	_also_see	03612378	0
09114696	_has_part	09418484	1
08579487	_member_meronym	02623170	0
03914919	_derivationally_related_form	01543731	1
03186005	_member_of_domain_region	01086945	0
09109444	_has_part	09441725	1
13076181	_member_of_domain_region	03074922	0
05410646	_hypernym	05407119	1
06481156	_member_of_domain_region	03093184	0
13063269	_hypernym	12992868	1
02601767	_member_of_domain_region	03233423	0
03928814	_hypernym	03614007	1
09244972	_has_part	01874784	0
02483915	_member_meronym	02484473	1
08122141	_derivationally_related_form	01453188	0
02068206	_hypernym	02066707	1
02571486	_has_part	02503313	0
02654425	_hypernym	02652668	1
02124623	_has_part	12058822	0
06845599	_member_of_domain_usage	03554131	1
02535909	_member_of_domain_usage	09313716	0
00483656	_derivationally_related_form	06863751	1
02896789	_similar_to	01635343	0
13063046	_hypernym	11594676	1
01453188	_instance_hypernym	09111168	0
00604617	_derivationally_related_form	04718563	1
15147850	_hypernym	07913081	0
06295235	_member_of_domain_usage	04323819	1
08136260	_member_of_domain_region	14757547	0
01144550	_derivationally_related_form	02443484	1
02156063	_member_meronym	12054902	0
09049599	_has_part	09103943	1
02896789	_has_part	01889520	0
13003522	_hypernym	12998815	1
02623170	_instance_hypernym	01227691	0
14974264	_derivationally_related_form	01268457	1
02720725	_verb_group	13030852	0
08860123	_member_of_domain_region	07889814	1
02423465	_member_meronym	06630017	0
02355477	_hypernym	02355227	1
02342109	_derivationally_related_form	02631238	0
09060768	_has_part	09326467	1
09332976	_member_of_domain_region	13048666	0
06510977	_derivationally_related_form	02896789	1
10550090	_member_of_domain_usage	02630052	0
04248851	_derivationally_related_form	01480770	1
02367993	_member_of_domain_usage	04760771	0
01758308	_derivationally_related_form	01173813	1
09076982	_member_meronym	13005329	0
14705718	_derivationally_related_form	01354006	1
08935212	_synset_domain_topic_of	08505573	0
09044862	_member_of_domain_region	08303692	1
13060451	_instance_hypernym	07722485	0
12992464	_member_meronym	11592146	1
09273447	_hypernym	06310945	0
03747746	_hypernym	03771443	1
04993882	_has_part	04349701	0
13031956	_hypernym	11592146	1
03650173	_member_meronym	15200314	0
01320513	_derivationally_related_form	10587227	1
09157163	_synset_domain_topic_of	02989685	0
02485451	_derivationally_related_form	01164874	1
09288946	_synset_domain_topic_of	08787695	0
01193099	_derivationally_related_form	00840630	1
13066631	_synset_domain_topic_of	00125633	0
13210006	_hypernym	13167078	1
02616572	_synset_domain_topic_of	01653975	0
03550533	_hypernym	02718469	1
02641608	_verb_group	02483224	0
02590237	_member_meronym	02592244	1
02124623	_also_see	00918471	0
02373093	_member_meronym	02373601	1
09356639	_derivationally_related_form	03324928	0
12982103	_hypernym	11590783	1
13246662	_member_of_domain_region	03192347	0
04353410	_hypernym	03828465	1
09083390	_similar_to	08143486	0
02072355	_member_meronym	02072493	1
01474283	_derivationally_related_form	02575325	0
09711132	_hypernym	09710164	1
09083390	_instance_hypernym	00513401	0
01290435	_instance_hypernym	01075117	1
10224098	_hypernym	00513401	0
09250165	_instance_hypernym	09453008	1
02102605	_hypernym	04993882	0
02156063	_derivationally_related_form	13773361	1
01444164	_instance_hypernym	09736633	0
09114696	_has_part	09228619	1
10113362	_verb_group	08504594	0
01284444	_instance_hypernym	00223983	1
09545324	_verb_group	03192347	0
09044862	_has_part	09089139	1
01646528	_instance_hypernym	02477890	0
02380980	_hypernym	01766952	1
09064594	_instance_hypernym	02415577	0
02553196	_member_meronym	02618244	1
08790953	_synset_domain_topic_of	10595361	0
12996225	_member_meronym	13065902	1
00374668	_member_of_domain_usage	08404895	0
06367373	_derivationally_related_form	01635176	1
00052146	_also_see	09693372	0
13068434	_hypernym	13066129	1
02082056	_member_meronym	02477890	0
02325211	_member_meronym	02325366	1
10113362	_similar_to	05959954	0
02554235	_derivationally_related_form	10663315	1
07635155	_synset_domain_topic_of	05525100	0
02574651	_member_meronym	02574910	1
09397391	_has_part	04242704	0
06295235	_member_of_domain_usage	09269972	1
06767777	_instance_hypernym	01821634	0
01546660	_member_meronym	01547459	1
02630052	_has_part	03198951	0
00288486	_derivationally_related_form	01928730	1
01889520	_member_of_domain_usage	09292751	0
09048880	_has_part	09092497	1
10198437	_similar_to	10198437	0
06295235	_member_of_domain_usage	01042764	1
09051726	_derivationally_related_form	13032115	0
00719705	_derivationally_related_form	02461063	1
07703889	_instance_hypernym	02586865	0
02590910	_derivationally_related_form	10788852	1
03612378	_has_part	07703889	0
00964105	_instance_hypernym	00962129	1
02989685	_member_of_domain_usage	09719430	0
09141526	_has_part	09388121	1
07842753	_member_of_domain_usage	00356367	0
10792335	_derivationally_related_form	01778017	1
12048772	_hypernym	03918297	0
02597367	_hypernym	02594250	1
09114696	_member_of_domain_region	14894140	0
02346315	_member_meronym	02346823	1
02352390	_also_see	03970363	0
00201058	_derivationally_related_form	01972131	1
03663433	_member_of_domain_usage	09772746	0
09152944	_has_part	09153710	1
04299699	_also_see	02477890	0
02564403	_hypernym	02562315	1
10069645	_verb_group	09398217	0
13030157	_member_meronym	13030438	1
00981369	_member_meronym	01475421	0
15165289	_has_part	15169136	1
00827379	_derivationally_related_form	13044778	0
02133704	_hypernym	02131653	1
01282466	_has_part	04586932	0
09044862	_has_part	09075842	1
10717921	_similar_to	09168707	0
00962722	_derivationally_related_form	02583780	1
00299680	_member_of_domain_region	02612393	0
02072159	_derivationally_related_form	00914343	1
01282466	_also_see	08214272	0
08932568	_has_part	08933940	1
09356639	_member_meronym	01465713	0
10075529	_derivationally_related_form	06371413	1
13881512	_derivationally_related_form	04449796	0
01883513	_hypernym	01874434	1
06369829	_synset_domain_topic_of	02431785	0
05010801	_derivationally_related_form	02675458	1
02354621	_has_part	00088713	0
01649948	_member_meronym	01650167	1
12041446	_synset_domain_topic_of	05407119	0
09138935	_has_part	09320985	1
04018399	_member_of_domain_region	08804487	0
09237076	_has_part	09405169	1
02499700	_similar_to	03937437	0
02688623	_derivationally_related_form	07802417	1
01465713	_derivationally_related_form	02411427	0
04236001	_derivationally_related_form	02701445	1
09959258	_has_part	14411243	0
03200357	_hypernym	03895866	1
03922412	_member_of_domain_usage	02346627	0
03718056	_hypernym	03214670	1
00858377	_derivationally_related_form	01227691	0
01644104	_hypernym	01626134	1
04419315	_verb_group	00223854	0
09044862	_has_part	09078231	1
01137696	_has_part	08557482	0
00751389	_derivationally_related_form	00848466	1
02665282	_member_meronym	03380134	0
09219078	_instance_hypernym	09403734	1
01474283	_derivationally_related_form	01282466	0
02546744	_member_meronym	02546873	1
10311661	_similar_to	02580991	0
05043973	_derivationally_related_form	02112029	1
09095023	_also_see	08349548	0
01649948	_member_meronym	01652163	1
04535524	_member_of_domain_usage	09452395	0
09078231	_derivationally_related_form	02738760	1
12968658	_member_of_domain_region	01438720	0
02989893	_hypernym	02996840	1
08935212	_verb_group	07752264	0
08860123	_member_of_domain_usage	10548227	1
01646528	_hypernym	01646528	0
