# Supplementary material
Source: ML conference proceedings conference paper supplement (https://proceedings.neurips.cc/paper_files/paper/2021/hash/0fd600c953cde8121262e322ef09f70e-Abstract.html)
Supplement: Supplementary file 1 [file 0fd600c953cde8121262e322ef09f70e-Supplemental.zip › Supplementary_Material_Paper_8745/data/GraIL-BM_WN18RR_v3/test/test-random-sample/test7.txt]

02521241	_member_meronym	02521916	1
14672224	_has_part	02658531	0
02341974	_hypernym	02339376	1
03612134	_derivationally_related_form	02448318	0
03109350	_instance_hypernym	04511002	1
06195698	_has_part	08504594	0
00053609	_derivationally_related_form	00426958	1
09682803	_has_part	06630017	0
01631759	_hypernym	01626134	1
02530421	_derivationally_related_form	02630052	0
08766988	_member_of_domain_region	09877443	1
09702134	_instance_hypernym	08256968	0
01215137	_derivationally_related_form	06547832	1
12063414	_synset_domain_topic_of	06630017	0
02923510	_derivationally_related_form	06234825	1
01126335	_member_of_domain_usage	12061104	0
08897065	_has_part	09168020	1
01890860	_derivationally_related_form	09807754	0
00014742	_hypernym	00014405	1
06366581	_also_see	08012765	0
00211108	_derivationally_related_form	13460568	1
01653975	_instance_hypernym	02721538	0
02354781	_hypernym	02353861	1
02136285	_similar_to	02652979	0
14894140	_hypernym	14727670	1
00126721	_has_part	10384214	0
02441723	_member_meronym	02442845	1
01890718	_member_of_domain_region	12982723	0
00963283	_derivationally_related_form	06790042	1
02509197	_derivationally_related_form	03922412	0
02832818	_derivationally_related_form	02720201	1
13042814	_member_of_domain_usage	15183802	0
01153305	_derivationally_related_form	00369194	1
03650173	_instance_hypernym	09051726	0
02601589	_member_meronym	02601921	1
07667326	_has_part	05525100	0
12043248	_member_meronym	12043444	1
10595361	_synset_domain_topic_of	07803992	0
01269360	_instance_hypernym	00223983	1
02582591	_instance_hypernym	01635343	0
00702226	_derivationally_related_form	04438304	1
01438720	_member_of_domain_usage	15187077	0
02399000	_derivationally_related_form	01174555	1
15200314	_member_of_domain_usage	02458356	0
09044862	_has_part	09110422	1
02540670	_similar_to	03198951	0
02453890	_member_meronym	02457586	1
09194357	_similar_to	09234104	0
01292727	_hypernym	01292534	1
08787695	_instance_hypernym	09648743	0
02528534	_member_meronym	02540255	1
02665282	_similar_to	12972414	0
02583139	_derivationally_related_form	00962129	1
02354621	_verb_group	09194357	0
02927512	_derivationally_related_form	09044862	1
02483224	_member_of_domain_region	09458791	0
00492677	_also_see	02111684	1
07450549	_member_of_domain_usage	03098140	0
02593863	_member_meronym	02595902	1
10102369	_has_part	02535909	0
00210738	_derivationally_related_form	13077033	1
10224098	_has_part	07066459	0
09044862	_member_of_domain_region	08122009	1
03970363	_similar_to	09717047	0
03299648	_hypernym	03214670	1
13319512	_instance_hypernym	14599168	0
04300080	_derivationally_related_form	01594362	1
09145851	_has_part	00294190	0
09401474	_instance_hypernym	09403734	1
09102517	_hypernym	06147873	0
09052652	_member_meronym	10802283	1
09192973	_similar_to	02751782	0
02398854	_derivationally_related_form	10271677	1
07883384	_hypernym	09023321	0
06778102	_derivationally_related_form	00853633	1
09343422	_hypernym	07631212	0
03829085	_hypernym	02718811	1
01271189	_member_of_domain_usage	09154178	0
01478300	_member_meronym	01478511	1
12972414	_member_meronym	02082056	0
12982723	_hypernym	11592146	1
10485440	_instance_hypernym	10641223	0
01454856	_hypernym	02552171	1
08505573	_member_meronym	13048666	0
02870092	_derivationally_related_form	06413889	1
00201058	_similar_to	13529616	0
04186848	_derivationally_related_form	01560369	1
09801102	_similar_to	02331175	0
06845599	_member_of_domain_usage	02705651	1
13044778	_has_part	10470779	0
01262936	_derivationally_related_form	07738353	1
09398217	_hypernym	02981024	0
08564307	_has_part	09109444	1
04018399	_member_of_domain_region	03654086	0
01042764	_hypernym	01041968	1
02310007	_instance_hypernym	08766988	0
08860123	_member_of_domain_region	04240576	1
07667326	_synset_domain_topic_of	07635155	0
09169801	_instance_hypernym	08505573	1
09144117	_verb_group	02509694	0
07450343	_derivationally_related_form	00855295	1
15155891	_member_of_domain_region	03928814	0
12972818	_hypernym	11594676	1
02592244	_derivationally_related_form	00702226	0
14607521	_derivationally_related_form	00264875	1
02483224	_similar_to	09082540	0
15155220	_has_part	15227846	1
01648001	_member_of_domain_usage	15200314	0
09131654	_has_part	09244972	1
03325769	_also_see	02888000	0
05588174	_derivationally_related_form	02884456	1
04586932	_synset_domain_topic_of	14894140	0
09714120	_derivationally_related_form	08953324	1
06776783	_similar_to	02608004	0
09141526	_has_part	09145083	1
07450549	_synset_domain_topic_of	06195698	0
01639369	_member_meronym	01642671	1
02398854	_similar_to	04349701	0
00626800	_also_see	00625393	1
13005329	_member_of_domain_usage	04497962	0
06845599	_member_of_domain_usage	04006727	1
01953810	_has_part	00702226	0
08381820	_hypernym	08381636	1
12061104	_instance_hypernym	09370383	0
07556637	_derivationally_related_form	01167188	1
09023321	_similar_to	03120029	0
00854150	_derivationally_related_form	10221312	1
13875185	_verb_group	02137549	0
08136260	_hypernym	08348815	1
01743531	_member_of_domain_region	01644900	0
10181990	_hypernym	10024119	1
09111168	_member_of_domain_usage	01821634	0
08860123	_member_of_domain_region	02463990	1
08772551	_synset_domain_topic_of	01628450	0
06845599	_member_of_domain_usage	03771066	1
01873310	_synset_domain_topic_of	13752911	0
06621447	_derivationally_related_form	02797021	1
08723006	_verb_group	01628450	0
12992464	_member_meronym	12975207	1
05411571	_member_meronym	06295235	0
09682291	_derivationally_related_form	02923510	1
02649082	_hypernym	02892948	0
02424085	_hypernym	02419796	1
09348460	_hypernym	09935233	0
09119277	_has_part	09370383	1
09154178	_member_of_domain_usage	01042764	0
08860123	_member_of_domain_region	07722485	1
14752057	_verb_group	06366581	0
14487731	_derivationally_related_form	00492706	1
00759944	_member_of_domain_region	12054902	0
04762355	_derivationally_related_form	00625393	1
02390101	_similar_to	02967626	0
13016457	_member_meronym	13001743	1
12968658	_instance_hypernym	05345581	0
01303582	_instance_hypernym	00962722	1
12063414	_member_meronym	14487184	0
02536165	_has_part	07796165	1
02343487	_verb_group	09398217	0
02601344	_has_part	07784367	1
00954086	_verb_group	01453330	0
08416652	_hypernym	08251877	1
02363818	_derivationally_related_form	03813834	0
00963283	_derivationally_related_form	00963241	1
02892948	_verb_group	02494538	0
02176747	_hypernym	02176261	1
09142674	_member_of_domain_region	02553196	0
06214580	_derivationally_related_form	10619176	1
09472597	_synset_domain_topic_of	03198951	0
07689217	_hypernym	07689003	1
09682803	_member_meronym	04449796	0
12970379	_member_meronym	12970560	1
09192973	_derivationally_related_form	06767777	0
10244913	_hypernym	09770949	1
12977296	_hypernym	12977296	0
08780881	_member_of_domain_region	07036862	1
04419315	_member_meronym	03198951	0
02066450	_member_meronym	02068735	1
03198951	_member_meronym	02369012	0
09117351	_has_part	09123809	1
01883920	_similar_to	02601921	0
04352070	_hypernym	02716205	1
10485440	_hypernym	04441282	0
13007417	_hypernym	12998815	1
03928814	_member_of_domain_usage	09717047	0
03854065	_hypernym	04586932	1
14040846	_instance_hypernym	10224098	0
13002433	_member_meronym	13003522	1
12073007	_hypernym	01449857	0
02655523	_hypernym	02652668	1
01194238	_member_meronym	01442591	0
01245813	_derivationally_related_form	01078050	1
14411243	_member_meronym	02751782	0
13077295	_derivationally_related_form	00210738	1
02650928	_similar_to	06964247	0
08615638	_derivationally_related_form	01934427	1
13048666	_member_of_domain_region	06767777	0
08860123	_member_of_domain_region	07696527	1
10412910	_similar_to	02073041	0
09078231	_member_of_domain_region	06938493	1
10113362	_derivationally_related_form	01274909	0
09048880	_has_part	09147964	1
03612134	_has_part	02368280	0
08365855	_derivationally_related_form	09945603	1
15071684	_hypernym	00431005	0
08505573	_hypernym	07941945	1
01295918	_verb_group	01653975	0
01523823	_derivationally_related_form	01244593	1
09292751	_has_part	02623445	0
00366858	_derivationally_related_form	13572436	1
00089657	_also_see	13042814	0
01273016	_hypernym	01531742	1
12041446	_verb_group	06630017	0
14994328	_derivationally_related_form	00266586	1
01293650	_hypernym	03380134	0
09134386	_has_part	09192708	1
09157021	_derivationally_related_form	15155891	0
02353844	_derivationally_related_form	03427296	1
12979129	_similar_to	02369012	0
12992464	_member_meronym	12992868	1
04053995	_also_see	01890718	0
01953810	_derivationally_related_form	04473432	1
08404895	_member_of_domain_usage	01890860	0
09071690	_has_part	09074431	1
01466828	_synset_domain_topic_of	02281485	0
02635013	_member_meronym	02635154	1
02351870	_similar_to	03612378	0
09117351	_member_of_domain_region	01294127	1
07573241	_member_meronym	09393605	0
02416104	_hypernym	02414578	1
02456147	_derivationally_related_form	03586631	0
15147850	_has_part	15146004	1
06481156	_synset_domain_topic_of	13032115	0
02456962	_hypernym	02453611	1
02629410	_member_meronym	15171008	0
13023292	_member_meronym	13024012	1
01324799	_derivationally_related_form	08557482	0
02470451	_member_meronym	02483915	1
06321702	_member_of_domain_usage	13802098	0
02601589	_member_meronym	02601767	1
01319874	_member_of_domain_region	01928390	0
09150448	_instance_hypernym	08672738	1
03769967	_member_meronym	13043264	0
06845599	_member_of_domain_usage	03748456	1
03519981	_has_part	09807754	0
03599761	_derivationally_related_form	02461063	1
02502357	_also_see	02456147	0
02623170	_member_meronym	02623868	1
00795161	_instance_hypernym	02640626	0
08894456	_has_part	09430771	1
02509694	_has_part	12977296	0
09416076	_hypernym	00019128	1
03470222	_similar_to	09051726	0
00963283	_derivationally_related_form	04879658	1
09907196	_hypernym	01440949	0
02131418	_member_meronym	02133902	1
02648456	_member_meronym	02574271	0
02509197	_hypernym	02507649	1
02349980	_member_of_domain_region	00458754	0
01448291	_hypernym	01446589	1
02368280	_has_part	01743531	0
14894140	_derivationally_related_form	02192383	1
02343772	_has_part	10641223	0
06295235	_member_of_domain_usage	03443912	1
09343422	_hypernym	01126846	0
09139380	_instance_hypernym	08665504	1
01086945	_hypernym	00233614	0
02602405	_hypernym	02552171	1
13025197	_hypernym	04134339	0
03457686	_hypernym	03461385	1
01550953	_derivationally_related_form	08557482	0
02484975	_hypernym	02484473	1
06366581	_member_of_domain_region	03586631	0
02449921	_member_meronym	02450034	1
13752911	_also_see	09082540	0
13024967	_member_meronym	13025647	1
01442591	_member_meronym	03120029	0
06845599	_member_of_domain_usage	14753808	1
10198437	_has_part	01245637	0
02112891	_similar_to	02111684	1
02631238	_member_of_domain_region	01213614	0
00624263	_derivationally_related_form	06372095	1
13753740	_similar_to	08764561	0
01642671	_member_meronym	01643092	1
06369829	_similar_to	00190999	0
13052931	_hypernym	13049953	1
02338592	_instance_hypernym	03928814	0
08953151	_has_part	08953324	1
02331175	_verb_group	02331479	0
02797021	_derivationally_related_form	06593803	1
00855295	_instance_hypernym	09397391	0
00902932	_derivationally_related_form	06630627	1
15298507	_synset_domain_topic_of	05407119	0
09886807	_hypernym	09700492	1
09498497	_similar_to	13044541	0
02548689	_hypernym	02552171	1
09102517	_synset_domain_topic_of	02601767	0
13516176	_derivationally_related_form	00210738	1
15169421	_also_see	01645278	0
07803408	_hypernym	07803545	1
01274909	_similar_to	04577293	0
02400139	_member_meronym	02423787	1
02530421	_member_of_domain_usage	00585810	0
06845599	_member_of_domain_usage	03818843	1
05385363	_member_meronym	00918471	0
08860123	_member_of_domain_region	08547300	1
09201301	_synset_domain_topic_of	02627292	0
02064154	_member_meronym	02064608	1
02541139	_member_of_domain_usage	02341108	0
08174398	_member_meronym	09044862	1
10659393	_synset_domain_topic_of	10382825	0
02007417	_derivationally_related_form	00281132	1
02631238	_similar_to	13066631	0
02465414	_derivationally_related_form	01186428	1
13044778	_has_part	02967626	0
08999482	_member_of_domain_region	09327077	1
01648620	_synset_domain_topic_of	02654256	0
08860123	_member_of_domain_region	13752172	1
00215683	_also_see	01227691	0
02396427	_hypernym	02395003	1
09194357	_instance_hypernym	15169421	0
02395244	_member_meronym	02396427	1
00025654	_hypernym	08729626	0
01552956	_member_meronym	01553142	1
02477890	_synset_domain_topic_of	08764561	0
04112752	_derivationally_related_form	00103317	1
08764561	_also_see	01915365	0
08014860	_instance_hypernym	08392137	1
10224098	_also_see	02571810	0
02011810	_derivationally_related_form	01778568	1
09093472	_member_meronym	15071684	0
06960298	_derivationally_related_form	02957823	1
01550953	_has_part	03612378	0
02658944	_member_meronym	02659176	1
01084180	_derivationally_related_form	01457082	0
00853633	_derivationally_related_form	00431005	1
13802098	_instance_hypernym	15147850	0
13010219	_hypernym	11590783	1
02630052	_member_of_domain_region	03962525	0
12060546	_hypernym	12041446	1
01438720	_verb_group	02599207	0
02329093	_member_meronym	02329401	1
09093472	_member_of_domain_usage	02338592	0
02535909	_member_meronym	02536864	1
02751782	_synset_domain_topic_of	02595702	0
02354950	_member_meronym	02355711	1
10102369	_derivationally_related_form	00513401	0
02400139	_member_meronym	02407959	1
02595569	_has_part	00485711	0
10082146	_derivationally_related_form	00991838	1
00299680	_synset_domain_topic_of	02601767	0
08723006	_member_of_domain_region	05915584	1
06630017	_hypernym	00419375	0
09721244	_derivationally_related_form	08961402	1
12063414	_synset_domain_topic_of	00038687	0
06295235	_member_of_domain_usage	07140348	1
00088713	_also_see	04221994	0
02660769	_member_meronym	02661765	1
09292751	_member_meronym	00619183	0
02366702	_member_meronym	02366825	1
00855295	_synset_domain_topic_of	08764561	0
01244593	_derivationally_related_form	00038365	1
01293650	_member_of_domain_usage	07631212	0
09095023	_has_part	09095751	1
03663433	_instance_hypernym	01645278	0
04051825	_derivationally_related_form	01130607	1
09064594	_synset_domain_topic_of	00800121	0
02672859	_derivationally_related_form	13529616	1
14411243	_hypernym	09877443	0
14883206	_derivationally_related_form	00443670	1
02062991	_member_of_domain_usage	05638778	0
09095751	_has_part	03009477	1
05525100	_hypernym	01446760	0
00902932	_hypernym	00897241	1
01294791	_hypernym	08785958	0
12998349	_member_meronym	13016457	1
01645093	_member_meronym	13003254	0
03568653	_hypernym	03828465	1
10208189	_also_see	02356381	0
08723006	_has_part	09327881	1
09134999	_has_part	09157163	0
09051235	_has_part	09075842	1
02892948	_member_of_domain_region	02369012	0
08860123	_member_of_domain_region	08555333	1
04305323	_also_see	02390101	0
00159899	_derivationally_related_form	00880227	1
02608004	_verb_group	07667326	0
12963796	_member_meronym	12965209	1
09453288	_also_see	06776783	0
01604251	_derivationally_related_form	00299680	1
02575325	_has_part	10489944	0
13011856	_member_meronym	13012030	1
01548301	_hypernym	07703889	0
02716866	_hypernym	02716205	1
02595702	_also_see	07649463	0
08766988	_has_part	08775784	1
09168707	_similar_to	09095023	0
00491689	_derivationally_related_form	09440186	1
02530421	_synset_domain_topic_of	13875185	0
09095023	_has_part	09306031	1
02349980	_member_of_domain_usage	01241594	0
01471070	_member_meronym	01626134	1
02362721	_has_part	01648620	0
00897241	_derivationally_related_form	06630017	1
10244913	_derivationally_related_form	06245084	0
12979630	_hypernym	11592146	1
09935233	_also_see	03192347	0
01542207	_verb_group	01541579	1
15169136	_member_of_domain_usage	01442591	0
01503061	_has_part	01896031	1
02364221	_hypernym	08774546	0
02640857	_hypernym	02640242	1
04577293	_member_of_domain_region	02471467	0
14487731	_derivationally_related_form	00493259	1
08339454	_also_see	03691459	0
02074915	_member_meronym	02083038	1
02485451	_synset_domain_topic_of	09351647	0
01645278	_hypernym	01626600	1
01084180	_instance_hypernym	03663433	0
13065215	_member_meronym	13065514	1
02133902	_has_part	07667326	0
00230172	_derivationally_related_form	02156546	1
02355477	_member_of_domain_usage	08256968	0
08801678	_has_part	08804962	1
04178329	_synset_domain_topic_of	03074922	0
02534734	_has_part	07795751	1
04535524	_also_see	02575325	0
02117900	_hypernym	02117135	1
03757925	_member_of_domain_region	06880664	0
04412727	_hypernym	02720201	1
13024012	_derivationally_related_form	12979478	0
00853633	_derivationally_related_form	10221312	1
01465713	_hypernym	13752911	0
01015996	_derivationally_related_form	10366779	1
14705533	_verb_group	09945603	0
02648313	_hypernym	02647660	1
15298507	_has_part	13881512	0
14996020	_derivationally_related_form	01245637	1
08570758	_synset_domain_topic_of	03966976	0
04879658	_derivationally_related_form	00963283	1
03093184	_hypernym	02134084	0
09075842	_has_part	09076675	1
02596381	_member_of_domain_usage	01042764	0
02641825	_member_meronym	02646377	1
08723006	_member_of_domain_region	02062744	0
15155220	_has_part	15165490	1
02310007	_hypernym	01398212	0
14599641	_derivationally_related_form	00264875	1
03519981	_member_of_domain_usage	01474283	0
10338094	_derivationally_related_form	02390101	1
06862202	_similar_to	04606014	0
02551824	_member_meronym	02552171	1
05978623	_synset_domain_topic_of	01953810	0
06845599	_member_of_domain_usage	04407007	1
01653975	_verb_group	07883384	0
01299735	_has_part	01295918	1
06263609	_member_of_domain_region	00329819	0
01647803	_member_meronym	01648001	1
12963140	_similar_to	02485451	0
08860123	_member_of_domain_region	04314522	1
02156063	_similar_to	04015204	0
08766988	_member_of_domain_region	09222742	1
13802098	_verb_group	02596381	0
02136271	_derivationally_related_form	04069276	1
07842753	_also_see	06767777	0
04010348	_hypernym	02720725	1
02596381	_member_of_domain_region	13650921	0
08860123	_member_of_domain_region	08504851	1
02509694	_verb_group	06369829	0
02379753	_derivationally_related_form	00212205	1
01634092	_derivationally_related_form	10470779	0
04733204	_derivationally_related_form	02262542	1
02448318	_member_of_domain_region	15200314	0
13060689	_member_meronym	13060912	1
02989178	_member_of_domain_region	00294190	0
04473432	_derivationally_related_form	01953810	1
09085441	_also_see	13041725	0
07229747	_hypernym	07229530	1
09867154	_similar_to	09095023	0
08780881	_has_part	08783286	1
13076181	_similar_to	04535524	0
14686913	_derivationally_related_form	00442267	1
06366581	_member_of_domain_usage	01645093	0
13054211	_member_meronym	13055009	1
09807754	_member_of_domain_region	02608004	0
12039743	_member_meronym	12045352	1
14607521	_verb_group	01349493	0
01915131	_derivationally_related_form	02898711	1
09144117	_also_see	03198951	0
08305942	_hypernym	08168978	1
07667326	_verb_group	08214272	0
08860123	_member_of_domain_region	03702719	1
12982723	_similar_to	01874784	0
07673397	_hypernym	07672135	1
13003254	_member_meronym	01821634	0
03519578	_hypernym	03519981	1
03612378	_has_part	15017121	0
01640383	_member_meronym	01640567	1
12063414	_has_part	01279120	0
02641608	_member_meronym	02651846	1
13042814	_similar_to	01304121	0
01465994	_member_meronym	01467986	1
03918297	_similar_to	09273447	0
03467517	_hypernym	04338517	1
02444103	_member_of_domain_region	09418484	0
13030852	_hypernym	13028611	1
07851054	_member_of_domain_usage	02457408	0
02412440	_derivationally_related_form	00058265	1
01844859	_member_of_domain_usage	04018399	0
08174398	_member_meronym	08780881	1
13064678	_derivationally_related_form	03151500	0
02854739	_hypernym	04508489	1
01137696	_hypernym	12926480	0
02389346	_verb_group	02389592	1
02896789	_member_of_domain_usage	08143486	0
14807929	_hypernym	05407119	1
04299699	_has_part	02620033	0
12985236	_hypernym	11592146	1
02996249	_instance_hypernym	01548301	0
14859622	_hypernym	14961512	1
09089782	_hypernym	09142674	0
02505809	_member_meronym	02505998	1
14040846	_has_part	02571810	0
06871384	_derivationally_related_form	01050896	1
10460033	_member_of_domain_usage	09678009	0
13016457	_member_meronym	13232515	1
01320513	_instance_hypernym	12926480	0
02659808	_hypernym	02658079	1
02369012	_also_see	00052146	0
09070793	_has_part	02956500	1
01324799	_also_see	04987620	0
00432839	_derivationally_related_form	14489113	1
01543731	_has_part	10490421	0
09368224	_derivationally_related_form	08641113	1
09393605	_member_of_domain_usage	02623445	0
00680485	_derivationally_related_form	06211078	1
10382825	_member_meronym	02398854	0
02340186	_hypernym	02339922	1
02595569	_synset_domain_topic_of	10311661	0
02175958	_derivationally_related_form	04989657	1
09682803	_has_part	09368224	0
00086835	_derivationally_related_form	00824054	1
01442591	_synset_domain_topic_of	02648456	0
13000372	_member_meronym	13005568	1
03093574	_has_part	00089657	0
09117351	_has_part	09192973	1
06147873	_similar_to	03233423	0
09761068	_derivationally_related_form	02470685	1
01547001	_also_see	01884348	0
02399000	_hypernym	02394477	1
13529616	_also_see	02483224	0
13753585	_hypernym	13745420	1
07667326	_hypernym	10595361	0
10621514	_derivationally_related_form	00849294	1
10476671	_derivationally_related_form	01890718	0
09095023	_member_of_domain_region	01283935	1
10595361	_member_meronym	07775905	0
08860123	_member_of_domain_region	09351547	1
07649463	_member_of_domain_usage	09192973	0
00772813	_derivationally_related_form	00963283	1
09143017	_verb_group	02437825	0
09284015	_derivationally_related_form	01567888	1
02068206	_verb_group	01084180	0
02071294	_hypernym	02068974	1
12972966	_instance_hypernym	02354621	0
07622261	_derivationally_related_form	01265740	1
04648207	_also_see	02661317	0
08095647	_member_meronym	08096474	1
02121234	_member_of_domain_usage	06966825	0
00410406	_derivationally_related_form	09738708	1
06880664	_instance_hypernym	02540670	0
02549533	_member_meronym	02549796	1
10489944	_also_see	03151500	0
06845599	_member_of_domain_usage	14753414	1
09408540	_member_of_domain_usage	02989178	0
06695862	_derivationally_related_form	00880227	1
03093574	_member_meronym	13030438	0
00883635	_hypernym	00883226	1
13623054	_also_see	03922412	0
02649218	_hypernym	02648625	1
09142674	_also_see	02062991	0
01645634	_hypernym	01626134	1
02062991	_synset_domain_topic_of	14752057	0
14836468	_hypernym	14732946	1
02625418	_member_of_domain_usage	01896031	0
09709001	_hypernym	09708405	1
09203217	_member_of_domain_usage	02062744	0
08554440	_hypernym	08553535	1
08505573	_hypernym	02513742	0
13077033	_hypernym	12992868	1
04603872	_hypernym	02582591	0
13043516	_hypernym	11590783	1
13650921	_also_see	09292751	0
13575433	_derivationally_related_form	00458754	1
00482180	_derivationally_related_form	06321702	0
01398941	_derivationally_related_form	04049405	1
02989178	_member_of_domain_region	01144550	0
02528534	_member_meronym	02541431	1
01453330	_synset_domain_topic_of	09222742	0
08801678	_member_of_domain_region	06964247	1
02362569	_member_of_domain_usage	00085626	0
08368308	_derivationally_related_form	02875499	1
04577293	_member_of_domain_region	14487731	0
02425086	_hypernym	02419796	1
04535524	_member_meronym	14672224	0
01640383	_member_meronym	01640846	1
03918297	_hypernym	08787695	0
08563627	_has_part	09057311	1
14040660	_member_of_domain_usage	02608004	0
08801099	_member_meronym	09696124	1
08348815	_member_of_domain_usage	02411705	0
01190840	_derivationally_related_form	07891726	1
09770949	_verb_group	00215683	0
09301249	_instance_hypernym	09241247	1
10209731	_member_of_domain_region	01282466	0
01883212	_member_meronym	01883513	1
03352961	_has_part	04586932	0
09071690	_has_part	09378014	1
08789605	_also_see	09023321	0
08342039	_hypernym	08339454	1
03962525	_also_see	00459114	0
04353016	_hypernym	04352070	1
00651954	_has_part	09070487	0
13070003	_hypernym	11590783	1
02623445	_synset_domain_topic_of	01648620	0
02607630	_member_meronym	02609466	1
08557482	_synset_domain_topic_of	03809939	0
13039870	_member_meronym	13040108	1
09051726	_verb_group	12964572	0
02535349	_member_meronym	02535537	1
13456715	_also_see	01896031	0
00105778	_derivationally_related_form	09930876	1
09243209	_member_of_domain_region	02415577	0
09682803	_derivationally_related_form	08095647	1
07573241	_similar_to	02415435	0
01890860	_hypernym	01889520	1
13802098	_similar_to	04443257	0
02936020	_derivationally_related_form	06321702	1
15159819	_also_see	10215623	0
15169248	_hypernym	15228378	1
10641223	_has_part	08549480	0
03933529	_derivationally_related_form	02331175	1
03198951	_has_part	14752057	0
10272171	_hypernym	09886010	1
04449796	_similar_to	03233423	0
14599168	_hypernym	14739360	1
13533470	_derivationally_related_form	01164874	0
13060451	_member_meronym	13062112	1
04946877	_similar_to	02499700	0
00252710	_derivationally_related_form	15147850	1
00038687	_similar_to	02121234	0
02521241	_member_meronym	02525543	1
00038687	_hypernym	00759944	0
10146927	_derivationally_related_form	00899597	1
01084180	_member_meronym	09678009	0
05951969	_derivationally_related_form	10306279	1
09693372	_also_see	06366581	0
03315644	_derivationally_related_form	01271189	1
14604959	_has_part	13048666	0
02435853	_hypernym	02399000	1
09545324	_member_of_domain_region	02509694	0
06845599	_member_of_domain_usage	03295357	1
09095023	_has_part	08028148	0
04764741	_derivationally_related_form	00485711	1
08404895	_member_meronym	02133902	0
08723006	_member_of_domain_region	08321469	1
08250635	_member_of_domain_usage	02553196	0
09052314	_instance_hypernym	09044862	1
07623933	_member_meronym	00485711	0
12083339	_member_meronym	12083591	1
02896789	_synset_domain_topic_of	07927197	0
09060768	_has_part	09358096	1
09150448	_verb_group	02649082	0
09044862	_has_part	09067277	1
02031622	_member_of_domain_region	05273684	0
06214744	_derivationally_related_form	00408852	1
09095023	_has_part	09095023	0
13037124	_hypernym	11592146	1
04443918	_member_of_domain_usage	02368280	0
00713250	_derivationally_related_form	01266895	1
08143486	_synset_domain_topic_of	02367993	0
06845599	_member_of_domain_usage	14747168	1
02394822	_hypernym	02351870	0
08801678	_member_of_domain_region	08541609	1
02592244	_hypernym	06263609	0
13298935	_hypernym	13298701	1
02133902	_verb_group	13030852	0
02409202	_hypernym	02407959	1
02336011	_derivationally_related_form	02623170	0
08860123	_member_of_domain_region	06699225	1
02553196	_member_of_domain_region	10641223	0
00105778	_derivationally_related_form	00427580	1
13802098	_instance_hypernym	02310007	0
07858595	_derivationally_related_form	02195470	1
02458356	_member_of_domain_usage	09092352	0
13015229	_hypernym	11592146	1
01672607	_similar_to	06321702	0
08174398	_member_meronym	09039411	1
02366825	_also_see	06883073	0
00419137	_derivationally_related_form	07443210	1
09242037	_synset_domain_topic_of	09702134	0
06845599	_member_of_domain_usage	03155334	1
01349493	_has_part	02660769	0
05716744	_derivationally_related_form	02196690	1
01645278	_synset_domain_topic_of	09194357	0
02420789	_derivationally_related_form	00719705	1
10160624	_hypernym	09155986	0
01468238	_hypernym	01466257	1
01213614	_member_of_domain_usage	13066631	0
00575970	_derivationally_related_form	15055633	1
09157163	_similar_to	02595569	0
09232165	_instance_hypernym	09475292	1
08221348	_has_part	02369012	0
08124971	_has_part	08125722	1
00329819	_has_part	01883920	0
12998349	_member_meronym	13074084	1
02660769	_similar_to	00088713	0
08641113	_derivationally_related_form	10352299	1
04015204	_similar_to	02581957	0
06201908	_derivationally_related_form	00680346	1
09356080	_also_see	03186005	0
00880227	_derivationally_related_form	06695579	1
13752911	_instance_hypernym	07618871	0
08984788	_has_part	09453566	1
12078596	_has_part	02724966	0
06845599	_member_of_domain_usage	04006953	1
08095647	_member_meronym	04438742	0
02066707	_hypernym	02062744	1
03198951	_derivationally_related_form	13064678	0
08929922	_member_of_domain_region	13753274	1
06373991	_verb_group	00923321	0
01126846	_hypernym	01127411	1
09142674	_derivationally_related_form	02366825	0
06413889	_derivationally_related_form	07009946	1
02533209	_hypernym	02650928	0
12968408	_member_meronym	12970379	1
04299699	_similar_to	01475421	0
09127461	_instance_hypernym	09399592	1
06349220	_member_meronym	09076982	0
00883226	_derivationally_related_form	07230089	1
09142674	_synset_domain_topic_of	09111168	0
00135285	_derivationally_related_form	06372095	1
01320513	_hypernym	02967626	0
10490421	_hypernym	09841188	1
13061704	_has_part	09244972	0
04051068	_hypernym	02673637	1
09092352	_member_of_domain_usage	02549989	0
02340930	_hypernym	02339376	1
01137696	_member_of_domain_region	01126335	0
08929922	_member_of_domain_region	06964901	1
02448318	_derivationally_related_form	02581957	0
02593863	_member_meronym	02596888	1
00085626	_has_part	02576223	0
06845599	_member_of_domain_usage	04476633	1
09064594	_has_part	01646528	0
09119277	_has_part	04604009	1
02369012	_instance_hypernym	01844859	0
08674970	_derivationally_related_form	02468965	1
00619183	_synset_domain_topic_of	02362569	0
00105554	_derivationally_related_form	00431005	1
09393605	_member_of_domain_region	03472796	0
09038990	_has_part	09719430	1
09867154	_verb_group	10384214	0
09243405	_instance_hypernym	09215664	1
08797254	_verb_group	02586865	0
15159583	_derivationally_related_form	00734927	1
04987620	_derivationally_related_form	02349980	0
02633677	_hypernym	02632989	1
08765623	_also_see	02437825	0
00485711	_derivationally_related_form	04764741	1
08570758	_has_part	09452395	0
01896031	_has_part	01897991	1
00356367	_also_see	13030438	0
01696135	_derivationally_related_form	04694809	1
02601767	_also_see	05407119	0
03670622	_hypernym	02716866	1
01896031	_derivationally_related_form	03192347	0
09087599	_has_part	09368479	1
09144117	_also_see	01164874	0
08149781	_hypernym	08081668	1
09458791	_hypernym	08256968	0
09260466	_hypernym	09416076	1
15170786	_has_part	03937437	0
13024763	_member_meronym	13024967	1
09159003	_member_meronym	01337653	0
02534352	_member_meronym	02535349	1
02574271	_member_of_domain_region	15170786	0
01891438	_member_meronym	01891633	1
10641223	_member_of_domain_usage	13875185	0
03612814	_hypernym	03990474	1
01442591	_instance_hypernym	04946877	0
09044862	_has_part	09111366	1
02494538	_also_see	02892948	0
03662016	_hypernym	03681148	1
08549480	_hypernym	03198951	0
02396796	_hypernym	02395003	1
03586631	_member_meronym	01543731	0
09082540	_has_part	09084483	1
09243209	_member_of_domain_usage	12072210	0
10318892	_derivationally_related_form	01743531	1
13030438	_member_of_domain_usage	10490421	0
12978969	_hypernym	11590783	1
01227691	_derivationally_related_form	05407119	0
06845599	_member_of_domain_usage	04443588	1
08790953	_member_of_domain_usage	04178329	0
02989475	_hypernym	02996840	1
01873310	_member_of_domain_usage	04603872	0
06344461	_hypernym	06343971	1
05949937	_also_see	02458135	0
01874928	_hypernym	01874434	1
01277755	_member_meronym	09058071	0
15228378	_hypernym	15129927	1
01890718	_derivationally_related_form	04946877	0
10352299	_derivationally_related_form	08641113	1
15159819	_synset_domain_topic_of	01885367	0
02068735	_member_meronym	02069569	1
02073041	_synset_domain_topic_of	04648207	0
02324045	_has_part	02158739	1
09877443	_instance_hypernym	09091398	0
02356108	_member_meronym	02355477	1
04603872	_hypernym	08256968	0
03362393	_hypernym	02715941	1
03769967	_member_of_domain_region	12072210	0
05681117	_has_part	05768553	1
09132778	_member_meronym	01324799	0
07427337	_derivationally_related_form	00223500	1
12061104	_verb_group	08136260	0
10582154	_derivationally_related_form	02540670	1
02446352	_member_of_domain_usage	09326467	0
09078231	_member_of_domain_region	02581957	1
02564130	_member_of_domain_usage	09159003	0
02507337	_member_meronym	02509694	1
10550090	_also_see	12979129	0
10268299	_derivationally_related_form	02614387	1
14894140	_similar_to	03151500	0
07443210	_derivationally_related_form	00441212	1
06630017	_verb_group	01245637	0
08780881	_member_of_domain_region	09542697	1
09134999	_member_of_domain_usage	05949937	0
02015168	_derivationally_related_form	00057306	1
13005329	_member_meronym	02483224	0
09039411	_member_of_domain_region	06340047	1
10055847	_also_see	08769645	0
02430191	_derivationally_related_form	01081456	1
02562315	_has_part	01453330	0
06845599	_member_of_domain_usage	03588668	1
02081282	_derivationally_related_form	00294190	0
06295235	_member_of_domain_usage	09212572	1
01547001	_also_see	03198951	0
02335349	_member_meronym	02338029	1
04497962	_instance_hypernym	07066459	0
13007770	_hypernym	11592146	1
09292751	_verb_group	04879658	0
07679356	_derivationally_related_form	01337653	1
08769645	_hypernym	03470222	0
02331309	_hypernym	02331046	1
02630052	_synset_domain_topic_of	13040303	0
00680346	_hypernym	00680145	1
01293167	_member_meronym	04107984	0
08986066	_instance_hypernym	08691669	1
02989685	_instance_hypernym	07678193	0
11517494	_derivationally_related_form	00073584	1
01543731	_has_part	13010219	0
09067277	_has_part	09373716	1
04443918	_member_of_domain_region	08787695	0
00842692	_derivationally_related_form	01186428	1
00495808	_has_part	09545324	0
00492677	_derivationally_related_form	08615374	1
14040846	_derivationally_related_form	00651954	0
13005329	_hypernym	12998815	1
09719430	_also_see	09692624	0
07653394	_hypernym	07649854	1
14411243	_has_part	08122141	0
10382825	_derivationally_related_form	03854065	1
02630052	_member_of_domain_region	02102605	0
02652668	_hypernym	02552171	1
02133902	_similar_to	12963140	0
00088725	_derivationally_related_form	01215137	1
08723006	_similar_to	09134386	0
02453890	_member_meronym	02456776	1
01443537	_verb_group	02631238	0
09400667	_instance_hypernym	09440186	1
02007417	_member_of_domain_usage	09408540	0
01158572	_derivationally_related_form	13451804	1
08557482	_synset_domain_topic_of	10102369	0
07779747	_hypernym	07775905	1
10055847	_also_see	01278232	0
01653026	_hypernym	01639765	1
08082236	_derivationally_related_form	09772746	0
02358091	_hypernym	02355227	1
04015204	_synset_domain_topic_of	02331175	0
04947628	_hypernym	04947186	1
00795161	_also_see	13044778	0
09075842	_has_part	09378014	1
06147873	_member_of_domain_region	02621721	0
08860123	_member_of_domain_region	07450343	1
12084746	_member_meronym	10641223	0
00040188	_derivationally_related_form	00256961	1
13048666	_also_see	13030438	0
02411705	_has_part	02439568	1
00089657	_instance_hypernym	13003254	0
09044862	_has_part	09059274	1
02601921	_verb_group	01928390	0
00991838	_derivationally_related_form	14864360	1
02408217	_member_meronym	04648207	0
02510455	_hypernym	02507649	1
08726463	_member_meronym	00088713	0
02546075	_derivationally_related_form	10183757	1
02331175	_member_meronym	10055847	0
02553196	_member_meronym	02621721	1
01874784	_has_part	12082593	0
00191517	_derivationally_related_form	13496771	1
02134084	_member_of_domain_region	02390101	0
02400139	_member_meronym	02409702	1
03997980	_also_see	02456275	0
14841267	_derivationally_related_form	02112891	1
04418644	_has_part	02630052	0
01167981	_derivationally_related_form	08253815	1
01474283	_verb_group	09114696	0
00492677	_derivationally_related_form	04764741	1
02411427	_similar_to	10113362	0
02341475	_hypernym	02339376	1
06263609	_member_of_domain_usage	08340153	0
10162354	_derivationally_related_form	03497657	1
12979478	_verb_group	07573241	0
02130308	_hypernym	02127808	1
02630468	_member_of_domain_region	02630281	0
01141938	_derivationally_related_form	02062744	1
09244972	_derivationally_related_form	15055633	0
07590611	_hypernym	07588947	1
04438742	_hypernym	07842753	0
02380009	_derivationally_related_form	10525617	1
00458754	_instance_hypernym	01144550	0
01888520	_member_meronym	01893535	1
07066459	_synset_domain_topic_of	09343422	0
01560369	_derivationally_related_form	00360242	1
02369012	_hypernym	02137549	0
01648494	_member_meronym	01648620	1
02631238	_similar_to	01320513	0
09194357	_has_part	09357847	1
01278232	_member_of_domain_region	13319512	0
12967776	_hypernym	11590783	1
02031622	_derivationally_related_form	07800487	0
08932568	_has_part	08933621	1
13076181	_instance_hypernym	02720725	0
01445027	_derivationally_related_form	14757547	1
08579487	_also_see	02620033	0
02457756	_member_meronym	02457945	1
03093184	_verb_group	09545324	0
13660178	_derivationally_related_form	00491689	1
09273447	_hypernym	00223854	0
01130607	_derivationally_related_form	04051825	1
02411705	_also_see	12926480	0
06845599	_member_of_domain_usage	15071684	1
08256968	_similar_to	13752911	0
02602212	_derivationally_related_form	07515974	1
02562315	_instance_hypernym	02066450	0
03497657	_has_part	02902079	1
02457408	_synset_domain_topic_of	08936303	0
09103943	_has_part	09459557	1
02457586	_member_meronym	08553280	0
00161739	_derivationally_related_form	01696648	1
02346627	_member_of_domain_usage	08936303	0
08133189	_hypernym	08337324	1
08726463	_has_part	03869222	0
00799537	_derivationally_related_form	02414473	1
01282466	_has_part	09134999	0
13205482	_member_meronym	13210006	1
00052146	_verb_group	09089782	0
08860123	_member_of_domain_region	04441528	1
04760771	_member_of_domain_usage	09313716	0
09109444	_has_part	09109882	1
00981369	_member_meronym	08729283	0
01305361	_hypernym	02085742	1
10208189	_derivationally_related_form	00431005	0
02336011	_hypernym	02329401	1
09288946	_also_see	12964572	0
03970363	_hypernym	02896442	1
15298507	_has_part	02082056	0
03061081	_derivationally_related_form	05996646	1
08256968	_has_part	02338592	0
13486270	_derivationally_related_form	00442267	1
09124039	_hypernym	01438720	0
01382818	_derivationally_related_form	01639765	1
13030852	_also_see	08404895	0
02673480	_hypernym	02832168	1
03093184	_has_part	13265904	0
08860123	_member_of_domain_region	07635155	1
02369012	_member_meronym	04418644	0
13006377	_hypernym	11592146	1
02654256	_synset_domain_topic_of	09143017	0
01075117	_hypernym	00954086	1
02456275	_instance_hypernym	02446352	0
02784732	_derivationally_related_form	01273263	1
08122141	_member_of_domain_usage	09877443	0
06295235	_member_of_domain_usage	03885028	1
04115456	_member_meronym	13061704	0
00089154	_derivationally_related_form	14283632	1
12063414	_member_of_domain_region	08811982	0
02907985	_instance_hypernym	04511002	1
02062991	_hypernym	03098140	0
15058163	_hypernym	15057744	1
07703889	_instance_hypernym	06929742	0
08910668	_has_part	09237404	1
02665282	_instance_hypernym	00025654	0
14276936	_hypernym	14070360	1
01294791	_member_of_domain_usage	05638778	0
08214470	_hypernym	08190754	1
07066459	_member_of_domain_usage	02281485	0
13038944	_member_meronym	13046285	1
03691459	_verb_group	07800487	0
00366858	_derivationally_related_form	15055633	1
01137696	_member_meronym	09368224	0
08860123	_member_of_domain_region	13359941	1
08782976	_instance_hypernym	07635155	0
02652979	_member_meronym	02653359	1
01645278	_has_part	10550090	0
13029946	_member_meronym	13030157	1
02068206	_synset_domain_topic_of	02398463	0
09114696	_has_part	09418484	1
09930876	_synset_domain_topic_of	03769967	0
03914919	_derivationally_related_form	01543731	1
13041725	_instance_hypernym	10198437	0
09109444	_has_part	09441725	1
02721538	_synset_domain_topic_of	09481285	0
05410646	_hypernym	05407119	1
02549989	_member_of_domain_region	02362721	0
13063269	_hypernym	12992868	1
13298011	_member_of_domain_usage	01453330	0
03928814	_hypernym	03614007	1
00485711	_member_meronym	06263609	0
02483915	_member_meronym	02484473	1
02509694	_instance_hypernym	09111168	0
02068206	_hypernym	02066707	1
01466828	_synset_domain_topic_of	10412910	0
02654425	_hypernym	02652668	1
01439121	_member_meronym	02652979	0
06845599	_member_of_domain_usage	03554131	1
06862202	_member_of_domain_region	02654256	0
00483656	_derivationally_related_form	06863751	1
02751782	_has_part	02509197	0
13063046	_hypernym	11594676	1
01285305	_similar_to	12978381	0
00604617	_derivationally_related_form	04718563	1
03192347	_similar_to	01273263	0
06295235	_member_of_domain_usage	04323819	1
09086070	_verb_group	02564130	0
01144550	_derivationally_related_form	02443484	1
12926480	_member_of_domain_region	08789605	0
09049599	_has_part	09103943	1
02934168	_synset_domain_topic_of	09155986	0
13003522	_hypernym	12998815	1
10079893	_instance_hypernym	03918297	0
14974264	_derivationally_related_form	01268457	1
02485451	_synset_domain_topic_of	02989685	0
08860123	_member_of_domain_region	07889814	1
14757547	_hypernym	01442591	0
02355477	_hypernym	02355227	1
09125203	_member_of_domain_region	09124039	0
09060768	_has_part	09326467	1
02989178	_instance_hypernym	02228901	0
06510977	_derivationally_related_form	02896789	1
00052146	_hypernym	03021531	0
04248851	_derivationally_related_form	01480770	1
06258228	_derivationally_related_form	02310007	0
01758308	_derivationally_related_form	01173813	1
02530421	_verb_group	08800676	0
14705718	_derivationally_related_form	01354006	1
00223854	_member_of_domain_region	02652979	0
09044862	_member_of_domain_region	08303692	1
09168707	_member_of_domain_region	00025654	0
12992464	_member_meronym	11592146	1
12061104	_synset_domain_topic_of	01213614	0
03747746	_hypernym	03771443	1
01821634	_similar_to	08396537	0
13031956	_hypernym	11592146	1
03198951	_has_part	03198951	0
01320513	_derivationally_related_form	10587227	1
13064678	_member_of_domain_region	02934168	0
02485451	_derivationally_related_form	01164874	1
07450549	_derivationally_related_form	06366581	0
01193099	_derivationally_related_form	00840630	1
02031622	_synset_domain_topic_of	02621721	0
13210006	_hypernym	13167078	1
09243209	_member_meronym	02363818	0
03550533	_hypernym	02718469	1
03472796	_member_of_domain_region	05978623	0
02590237	_member_meronym	02592244	1
01449586	_verb_group	02458135	0
02373093	_member_meronym	02373601	1
01889520	_has_part	02586865	0
12982103	_hypernym	11590783	1
01457082	_instance_hypernym	02477890	0
04353410	_hypernym	03828465	1
10131815	_synset_domain_topic_of	01648620	0
02072355	_member_meronym	02072493	1
13043264	_member_meronym	02625418	0
09711132	_hypernym	09710164	1
01874784	_member_meronym	13061704	0
01290435	_instance_hypernym	01075117	1
01646528	_verb_group	03918297	0
09250165	_instance_hypernym	09453008	1
03093574	_also_see	06862202	0
02156063	_derivationally_related_form	13773361	1
05385363	_instance_hypernym	01453330	0
09114696	_has_part	09228619	1
02641608	_synset_domain_topic_of	09702134	0
01284444	_instance_hypernym	00223983	1
00245289	_member_of_domain_usage	01398212	0
09044862	_has_part	09089139	1
02632239	_also_see	02952109	0
02380980	_hypernym	01766952	1
03352961	_has_part	01086945	0
02553196	_member_meronym	02618244	1
02124623	_instance_hypernym	12058822	0
12996225	_member_meronym	13065902	1
00223854	_member_of_domain_usage	01453330	0
06367373	_derivationally_related_form	01635176	1
03093184	_member_meronym	08774546	0
13068434	_hypernym	13066129	1
01890718	_member_of_domain_region	04341133	0
02325211	_member_meronym	02325366	1
00329819	_derivationally_related_form	14040660	0
02554235	_derivationally_related_form	10663315	1
09288946	_similar_to	02364221	0
02574651	_member_meronym	02574910	1
13265904	_also_see	01278232	0
06295235	_member_of_domain_usage	09269972	1
02415577	_hypernym	02448318	0
01546660	_member_meronym	01547459	1
01268112	_member_meronym	08764561	0
00288486	_derivationally_related_form	01928730	1
13753740	_member_of_domain_region	02630468	0
09048880	_has_part	09092497	1
00485711	_derivationally_related_form	00991838	0
06295235	_member_of_domain_usage	01042764	1
02369012	_has_part	13298011	0
00719705	_derivationally_related_form	02461063	1
01385920	_member_of_domain_usage	00125633	0
02590910	_derivationally_related_form	10788852	1
02310007	_similar_to	00482180	0
00964105	_instance_hypernym	00962129	1
01271189	_instance_hypernym	09701603	0
09141526	_has_part	09388121	1
01304121	_member_of_domain_usage	01645093	0
10792335	_derivationally_related_form	01778017	1
02934168	_instance_hypernym	02629410	0
02597367	_hypernym	02594250	1
08348815	_derivationally_related_form	01324799	0
02346315	_member_meronym	02346823	1
02616572	_similar_to	00125633	0
00201058	_derivationally_related_form	01972131	1
02631238	_has_part	02631238	0
09152944	_has_part	09153710	1
02751782	_instance_hypernym	07752264	0
02564403	_hypernym	02562315	1
15165490	_hypernym	02640626	0
13030157	_member_meronym	13030438	1
09867154	_has_part	03233423	0
15165289	_has_part	15169136	1
02342109	_instance_hypernym	10476671	0
02133704	_hypernym	02131653	1
02437825	_similar_to	13024967	0
09044862	_has_part	09075842	1
01443537	_derivationally_related_form	15017121	0
00962722	_derivationally_related_form	02583780	1
00458754	_hypernym	02389346	0
02072159	_derivationally_related_form	00914343	1
01213614	_similar_to	08789605	0
08932568	_has_part	08933940	1
10641223	_also_see	08785958	0
10075529	_derivationally_related_form	06371413	1
00233614	_verb_group	02580991	0
01883513	_hypernym	01874434	1
02349980	_similar_to	03120029	0
05010801	_derivationally_related_form	02675458	1
06258228	_has_part	08723006	0
01649948	_member_meronym	01650167	1
02650928	_member_of_domain_region	01282711	0
09138935	_has_part	09320985	1
01385920	_member_of_domain_region	04053995	0
09237076	_has_part	09405169	1
01282466	_instance_hypernym	07623933	0
02688623	_derivationally_related_form	07802417	1
03644378	_derivationally_related_form	02341108	0
04236001	_derivationally_related_form	02701445	1
02477890	_synset_domain_topic_of	08339454	0
03200357	_hypernym	03895866	1
02630052	_also_see	09772746	0
03718056	_hypernym	03214670	1
08549480	_also_see	08012765	0
01644104	_hypernym	01626134	1
14894140	_has_part	07623933	0
09044862	_has_part	09078231	1
14705533	_similar_to	02571486	0
00751389	_derivationally_related_form	00848466	1
02310007	_also_see	06321702	0
09219078	_instance_hypernym	09403734	1
13044778	_member_of_domain_usage	03769967	0
02546744	_member_meronym	02546873	1
03997980	_has_part	02546873	0
05043973	_derivationally_related_form	02112029	1
00201058	_also_see	03251766	0
01649948	_member_meronym	01652163	1
02415577	_member_of_domain_region	09064594	0
09078231	_derivationally_related_form	02738760	1
09051726	_similar_to	04015204	0
02989893	_hypernym	02996840	1
10595361	_verb_group	01324799	0
08860123	_member_of_domain_usage	10548227	1
02967626	_member_meronym	09452395	0
