# Supplementary material
Source: ML conference proceedings conference paper supplement (https://proceedings.neurips.cc/paper_files/paper/2021/hash/0fd600c953cde8121262e322ef09f70e-Abstract.html)
Supplement: Supplementary file 1 [file 0fd600c953cde8121262e322ef09f70e-Supplemental.zip › Supplementary_Material_Paper_8745/data/GraIL-BM_WN18RR_v3/test/test-random-sample/test8.txt]

02521241	_member_meronym	02521916	1
02007417	_also_see	07703889	0
02341974	_hypernym	02339376	1
03691459	_member_meronym	02621721	0
03109350	_instance_hypernym	04511002	1
04946877	_hypernym	04987620	0
00053609	_derivationally_related_form	00426958	1
03661861	_has_part	09229409	0
01631759	_hypernym	01626134	1
13875185	_similar_to	02652979	0
08766988	_member_of_domain_region	09877443	1
02458356	_derivationally_related_form	09648743	0
01215137	_derivationally_related_form	06547832	1
01635343	_similar_to	09343422	0
02923510	_derivationally_related_form	06234825	1
02408217	_member_of_domain_region	00651954	0
08897065	_has_part	09168020	1
07667326	_derivationally_related_form	00374668	0
00014742	_hypernym	00014405	1
01635343	_member_of_domain_usage	05614657	0
00211108	_derivationally_related_form	13460568	1
02062744	_similar_to	06373991	0
02354781	_hypernym	02353861	1
02503313	_member_meronym	02449921	0
14894140	_hypernym	14727670	1
02620033	_instance_hypernym	01440949	0
02441723	_member_meronym	02442845	1
02631238	_derivationally_related_form	02351870	0
00963283	_derivationally_related_form	06790042	1
01277288	_derivationally_related_form	13950812	0
02832818	_derivationally_related_form	02720201	1
09408540	_hypernym	07883384	0
01153305	_derivationally_related_form	00369194	1
13650921	_similar_to	09086070	0
02601589	_member_meronym	02601921	1
07678193	_member_of_domain_usage	03966976	0
12043248	_member_meronym	12043444	1
07803992	_hypernym	02558350	0
01269360	_instance_hypernym	00223983	1
14487731	_member_of_domain_usage	10208189	0
00702226	_derivationally_related_form	04438304	1
02380009	_member_of_domain_usage	02133704	0
02399000	_derivationally_related_form	01174555	1
08726463	_instance_hypernym	13753740	0
09044862	_has_part	09110422	1
00215683	_derivationally_related_form	00215683	0
02453890	_member_meronym	02457586	1
09356639	_verb_group	02661317	0
01292727	_hypernym	01292534	1
00245289	_synset_domain_topic_of	13024012	0
02528534	_member_meronym	02540255	1
09452395	_derivationally_related_form	00991838	0
02583139	_derivationally_related_form	00962129	1
01466828	_verb_group	02411427	0
02927512	_derivationally_related_form	09044862	1
00375021	_instance_hypernym	02574489	0
00492677	_also_see	02111684	1
02362569	_instance_hypernym	08877382	0
02593863	_member_meronym	02595902	1
02362721	_hypernym	01672607	0
00210738	_derivationally_related_form	13077033	1
03937437	_instance_hypernym	02411705	0
09044862	_member_of_domain_region	08122009	1
07803992	_member_of_domain_usage	09155986	0
03299648	_hypernym	03214670	1
10382825	_similar_to	02137549	0
04300080	_derivationally_related_form	01594362	1
01303582	_also_see	12063414	0
09401474	_instance_hypernym	09403734	1
01293650	_hypernym	01631759	0
09052652	_member_meronym	10802283	1
14757547	_verb_group	04946877	0
02398854	_derivationally_related_form	10271677	1
08787466	_similar_to	02502357	0
06778102	_derivationally_related_form	00853633	1
01672607	_member_of_domain_region	02596381	0
03829085	_hypernym	02718811	1
03869222	_member_meronym	02124623	0
01478300	_member_meronym	01478511	1
09959258	_member_of_domain_region	00089657	0
12982723	_hypernym	11592146	1
12062227	_member_of_domain_usage	01548301	0
01454856	_hypernym	02552171	1
01547001	_synset_domain_topic_of	15159819	0
02870092	_derivationally_related_form	06413889	1
02630468	_member_of_domain_usage	00223854	0
04186848	_derivationally_related_form	01560369	1
07791274	_synset_domain_topic_of	01648620	0
06845599	_member_of_domain_usage	02705651	1
02648456	_hypernym	10476671	0
01262936	_derivationally_related_form	07738353	1
03093184	_member_meronym	12054902	0
08564307	_has_part	09109444	1
09058071	_derivationally_related_form	10224098	0
01042764	_hypernym	01041968	1
09452395	_similar_to	07635155	0
08860123	_member_of_domain_region	04240576	1
12061104	_member_of_domain_usage	00458754	0
09169801	_instance_hypernym	08505573	1
02589955	_also_see	08785958	0
07450343	_derivationally_related_form	00855295	1
04473432	_verb_group	04178329	0
12972818	_hypernym	11594676	1
01294791	_also_see	01453188	0
14607521	_derivationally_related_form	00264875	1
02637046	_member_of_domain_usage	01896031	0
15155220	_has_part	15227846	1
02499434	_has_part	09131428	0
09131654	_has_part	09244972	1
08877807	_member_of_domain_usage	01630284	0
05588174	_derivationally_related_form	02884456	1
14599168	_synset_domain_topic_of	02396427	0
09714120	_derivationally_related_form	08953324	1
02724966	_has_part	08348815	0
09141526	_has_part	09145083	1
09168020	_member_meronym	02592244	0
01639369	_member_meronym	01642671	1
07667326	_also_see	07678193	0
00626800	_also_see	00625393	1
02068206	_member_of_domain_region	10382825	0
06845599	_member_of_domain_usage	04006727	1
08790953	_verb_group	01890860	0
08381820	_hypernym	08381636	1
09233284	_derivationally_related_form	07800487	0
07556637	_derivationally_related_form	01167188	1
04443918	_synset_domain_topic_of	02368280	0
00854150	_derivationally_related_form	10221312	1
10717921	_instance_hypernym	12048231	0
08136260	_hypernym	08348815	1
01883920	_synset_domain_topic_of	14040660	0
10181990	_hypernym	10024119	1
02706373	_member_of_domain_region	12977795	0
08860123	_member_of_domain_region	02463990	1
03881534	_also_see	15160418	0
06845599	_member_of_domain_usage	03771066	1
10215623	_member_of_domain_region	15169421	0
06621447	_derivationally_related_form	02797021	1
08012765	_also_see	13623054	0
12992464	_member_meronym	12975207	1
09243209	_member_of_domain_region	13456715	0
09682291	_derivationally_related_form	02923510	1
02356381	_similar_to	07066459	0
02424085	_hypernym	02419796	1
06349220	_instance_hypernym	12978381	0
09119277	_has_part	09370383	1
10208189	_verb_group	02356381	0
08860123	_member_of_domain_region	07722485	1
01465713	_synset_domain_topic_of	12978381	0
14487731	_derivationally_related_form	00492706	1
02354621	_derivationally_related_form	04993882	0
04762355	_derivationally_related_form	00625393	1
02650928	_synset_domain_topic_of	02494538	0
13016457	_member_meronym	13001743	1
00019128	_member_meronym	01285305	0
01303582	_instance_hypernym	00962722	1
03198951	_member_of_domain_region	01439121	0
02536165	_has_part	07796165	1
02751782	_member_of_domain_usage	02343187	0
02601344	_has_part	07784367	1
09201301	_instance_hypernym	08404895	0
08416652	_hypernym	08251877	1
13881512	_member_of_domain_region	08729626	0
00963283	_derivationally_related_form	00963241	1
01385920	_instance_hypernym	12926480	0
02176747	_hypernym	02176261	1
02228901	_member_meronym	02499700	0
06214580	_derivationally_related_form	10619176	1
08082236	_member_meronym	01646528	0
07689217	_hypernym	07689003	1
08493493	_member_of_domain_region	00954086	0
12970379	_member_meronym	12970560	1
01631759	_member_of_domain_region	02620033	0
10244913	_hypernym	09770949	1
08557482	_verb_group	02389346	0
08780881	_member_of_domain_region	07036862	1
04728376	_member_of_domain_region	14487731	0
02066450	_member_meronym	02068735	1
02606590	_instance_hypernym	08557482	0
09117351	_has_part	09123809	1
02592607	_member_of_domain_usage	02623445	0
04352070	_hypernym	02716205	1
02661317	_instance_hypernym	10113362	0
13007417	_hypernym	12998815	1
09095023	_instance_hypernym	03661861	0
03854065	_hypernym	04586932	1
14604959	_instance_hypernym	14411243	0
13002433	_member_meronym	13003522	1
14752057	_similar_to	02369012	0
02655523	_hypernym	02652668	1
07635155	_member_of_domain_usage	09452395	0
01245813	_derivationally_related_form	01078050	1
08493493	_has_part	09386422	0
13077295	_derivationally_related_form	00210738	1
02613960	_similar_to	09124039	0
08615638	_derivationally_related_form	01934427	1
10102369	_derivationally_related_form	09458791	0
08860123	_member_of_domain_region	07696527	1
01126846	_hypernym	09343422	0
09078231	_member_of_domain_region	06938493	1
02620033	_has_part	09418484	0
09048880	_has_part	09147964	1
10244913	_verb_group	01398212	0
08365855	_derivationally_related_form	09945603	1
02031622	_instance_hypernym	09907196	0
08505573	_hypernym	07941945	1
01876180	_hypernym	09201301	0
01523823	_derivationally_related_form	01244593	1
01942177	_member_of_domain_region	01050896	0
00366858	_derivationally_related_form	13572436	1
13533470	_synset_domain_topic_of	09058071	0
01273016	_hypernym	01531742	1
00294190	_hypernym	03224032	0
14994328	_derivationally_related_form	00266586	1
05385363	_verb_group	05385363	0
09134386	_has_part	09192708	1
02477890	_member_of_domain_region	13041725	0
02353844	_derivationally_related_form	03427296	1
00627437	_verb_group	12975608	0
12992464	_member_meronym	12992868	1
02362721	_derivationally_related_form	08766988	0
01953810	_derivationally_related_form	04473432	1
08122141	_similar_to	13030438	0
09071690	_has_part	09074431	1
02432511	_member_of_domain_usage	09807754	0
02635013	_member_meronym	02635154	1
00827379	_verb_group	01279120	0
09117351	_member_of_domain_region	01294127	1
01398212	_member_of_domain_region	08337324	0
02416104	_hypernym	02414578	1
06344461	_member_of_domain_region	02619738	0
15147850	_has_part	15146004	1
06195698	_instance_hypernym	09192973	0
02456962	_hypernym	02453611	1
09348460	_synset_domain_topic_of	03612134	0
13023292	_member_meronym	13024012	1
15146004	_has_part	06295235	0
02470451	_member_meronym	02483915	1
12977296	_derivationally_related_form	09089782	0
02601589	_member_meronym	02601767	1
07678193	_member_of_domain_usage	00252710	0
09150448	_instance_hypernym	08672738	1
02661317	_hypernym	01274909	0
06845599	_member_of_domain_usage	03748456	1
13030438	_instance_hypernym	07842753	0
03599761	_derivationally_related_form	02461063	1
04993882	_member_of_domain_region	01646528	0
02623170	_member_meronym	02623868	1
01696648	_has_part	12041446	0
08894456	_has_part	09430771	1
04134339	_member_of_domain_region	04053995	0
09416076	_hypernym	00019128	1
02720725	_verb_group	02595339	0
00963283	_derivationally_related_form	04879658	1
14599168	_also_see	02396427	0
02131418	_member_meronym	02133902	1
02477890	_synset_domain_topic_of	10659393	0
02509197	_hypernym	02507649	1
15160418	_synset_domain_topic_of	15273955	0
01448291	_hypernym	01446589	1
08785958	_has_part	07752264	0
14894140	_derivationally_related_form	02192383	1
02540670	_verb_group	04586932	0
06295235	_member_of_domain_usage	03443912	1
01646528	_derivationally_related_form	02124623	0
09139380	_instance_hypernym	08665504	1
09326467	_has_part	03093574	0
02602405	_hypernym	02552171	1
10717921	_also_see	07913081	0
03457686	_hypernym	03461385	1
02661317	_member_of_domain_usage	05959954	0
02484975	_hypernym	02484473	1
08697827	_similar_to	09371816	0
02449921	_member_meronym	02450034	1
13802098	_instance_hypernym	02458356	0
13024967	_member_meronym	13025647	1
02563497	_also_see	09370383	0
06845599	_member_of_domain_usage	14753808	1
01015996	_has_part	08404895	0
02112891	_similar_to	02111684	1
00245289	_member_of_domain_usage	09203217	0
00624263	_derivationally_related_form	06372095	1
14487731	_instance_hypernym	01465713	0
01642671	_member_meronym	01643092	1
02343187	_derivationally_related_form	01293167	0
13052931	_hypernym	13049953	1
09458791	_has_part	10412910	0
08953151	_has_part	08953324	1
01635343	_hypernym	02133704	0
02797021	_derivationally_related_form	06593803	1
01277288	_synset_domain_topic_of	07667326	0
00902932	_derivationally_related_form	06630627	1
13042814	_member_meronym	13042814	0
09886807	_hypernym	09700492	1
09292751	_member_of_domain_usage	13298011	0
02548689	_hypernym	02552171	1
05525100	_member_of_domain_usage	10472799	0
13516176	_derivationally_related_form	00210738	1
01646528	_verb_group	01885367	0
07803408	_hypernym	07803545	1
02608004	_member_meronym	02629410	0
02400139	_member_meronym	02423787	1
01634092	_has_part	14599168	0
06845599	_member_of_domain_usage	03818843	1
07803408	_verb_group	13024967	0
08860123	_member_of_domain_region	08547300	1
13529616	_hypernym	00019128	0
02064154	_member_meronym	02064608	1
00283911	_member_of_domain_region	01882125	0
08174398	_member_meronym	09044862	1
04018399	_member_of_domain_usage	12979129	0
02007417	_derivationally_related_form	00281132	1
07703889	_member_of_domain_usage	04987620	0
02465414	_derivationally_related_form	01186428	1
04349701	_also_see	00855295	0
08999482	_member_of_domain_region	09327077	1
02601767	_has_part	08028148	0
08860123	_member_of_domain_region	13752172	1
01890860	_has_part	02485451	0
02396427	_hypernym	02395003	1
09801102	_synset_domain_topic_of	13246662	0
02395244	_member_meronym	02396427	1
12977565	_synset_domain_topic_of	00485711	0
01552956	_member_meronym	01553142	1
09098721	_hypernym	01889074	0
04112752	_derivationally_related_form	00103317	1
02619738	_member_of_domain_usage	02380009	0
08014860	_instance_hypernym	08392137	1
02457586	_hypernym	08877382	0
02011810	_derivationally_related_form	01778568	1
02608004	_member_meronym	00991838	0
06960298	_derivationally_related_form	02957823	1
07649463	_member_of_domain_usage	01444164	0
02658944	_member_meronym	02659176	1
04134339	_also_see	00294190	0
00853633	_derivationally_related_form	00431005	1
08877382	_member_meronym	08772551	0
13010219	_hypernym	11590783	1
14040660	_hypernym	09692624	0
12060546	_hypernym	12041446	1
08028148	_similar_to	08579487	0
02329093	_member_meronym	02329401	1
00495808	_synset_domain_topic_of	15165490	0
02535909	_member_meronym	02536864	1
03352961	_verb_group	14672224	0
02354950	_member_meronym	02355711	1
09736633	_member_of_domain_region	09084196	0
02400139	_member_meronym	02407959	1
01319874	_synset_domain_topic_of	06880664	0
10082146	_derivationally_related_form	00991838	1
12977795	_member_meronym	11875691	0
08723006	_member_of_domain_region	05915584	1
12058822	_member_of_domain_usage	04221994	0
09721244	_derivationally_related_form	08961402	1
09122968	_also_see	00088713	0
06295235	_member_of_domain_usage	07140348	1
02281485	_also_see	00513401	0
02660769	_member_meronym	02661765	1
01438720	_has_part	12977795	0
02366702	_member_meronym	02366825	1
02362721	_member_of_domain_region	02564130	0
01244593	_derivationally_related_form	00038365	1
08557482	_derivationally_related_form	14757547	0
09095023	_has_part	09095751	1
01466828	_member_meronym	08504594	0
04051825	_derivationally_related_form	01130607	1
13226698	_synset_domain_topic_of	01173826	0
02672859	_derivationally_related_form	13529616	1
01287431	_hypernym	02437825	0
14883206	_derivationally_related_form	00443670	1
01290435	_verb_group	02369012	0
09095751	_has_part	03009477	1
12977565	_member_meronym	02458135	0
00902932	_hypernym	00897241	1
02456147	_synset_domain_topic_of	01821634	0
12998349	_member_meronym	13016457	1
02534734	_verb_group	02352390	0
03568653	_hypernym	03828465	1
09398217	_verb_group	01137696	0
08723006	_has_part	09327881	1
09807754	_derivationally_related_form	00329819	0
09051235	_has_part	09075842	1
00485711	_similar_to	09201301	0
08860123	_member_of_domain_region	08555333	1
05236029	_member_of_domain_usage	01137696	0
00159899	_derivationally_related_form	00880227	1
09134386	_similar_to	02062744	0
12963796	_member_meronym	12965209	1
02981024	_hypernym	02331479	0
01604251	_derivationally_related_form	00299680	1
01294791	_synset_domain_topic_of	13623054	0
13011856	_member_meronym	13012030	1
04221994	_instance_hypernym	12975608	0
02716866	_hypernym	02716205	1
02659808	_also_see	12978381	0
08766988	_has_part	08775784	1
09143017	_member_of_domain_region	06344461	0
00491689	_derivationally_related_form	09440186	1
02652979	_member_of_domain_usage	00459114	0
09095023	_has_part	09306031	1
02499434	_verb_group	03928814	0
01471070	_member_meronym	01626134	1
02390101	_similar_to	12063414	0
00897241	_derivationally_related_form	06630017	1
08337324	_synset_domain_topic_of	01628450	0
12979630	_hypernym	11592146	1
02426634	_hypernym	02832168	0
01542207	_verb_group	01541579	1
03093184	_derivationally_related_form	09717047	0
01503061	_has_part	01896031	1
02661317	_hypernym	09070487	0
02640857	_hypernym	02640242	1
08563180	_instance_hypernym	02564130	0
14487731	_derivationally_related_form	00493259	1
10198437	_member_meronym	03233423	0
02074915	_member_meronym	02083038	1
03186005	_instance_hypernym	02458135	0
01645278	_hypernym	01626600	1
08729626	_has_part	05273684	0
13065215	_member_meronym	13065514	1
08337324	_similar_to	10131815	0
00230172	_derivationally_related_form	02156546	1
03962525	_hypernym	00223854	0
08801678	_has_part	08804962	1
03962525	_member_meronym	14299336	0
02534734	_has_part	07795751	1
01278232	_synset_domain_topic_of	09498497	0
02117900	_hypernym	02117135	1
02331175	_synset_domain_topic_of	01291674	0
04412727	_hypernym	02720201	1
03074922	_derivationally_related_form	09719430	0
00853633	_derivationally_related_form	10221312	1
08769645	_member_of_domain_usage	02341108	0
01015996	_derivationally_related_form	10366779	1
13881512	_derivationally_related_form	01293650	0
02648313	_hypernym	02647660	1
01446283	_similar_to	14732946	0
14996020	_derivationally_related_form	01245637	1
02529111	_instance_hypernym	02156063	0
04879658	_derivationally_related_form	00963283	1
02797021	_member_of_domain_usage	06481156	0
09075842	_has_part	09076675	1
02261642	_synset_domain_topic_of	14746048	0
02641825	_member_meronym	02646377	1
01881857	_member_meronym	00856847	0
15155220	_has_part	15165490	1
03644378	_member_of_domain_usage	02364221	0
14599641	_derivationally_related_form	00264875	1
05959954	_derivationally_related_form	08256968	0
10338094	_derivationally_related_form	02390101	1
02581957	_verb_group	01279120	0
02551824	_member_meronym	02552171	1
05236029	_also_see	14757547	0
06845599	_member_of_domain_usage	04407007	1
09393605	_similar_to	07573241	0
01299735	_has_part	01295918	1
13048666	_has_part	15183802	0
01647803	_member_meronym	01648001	1
03074922	_member_of_domain_usage	02485451	0
08860123	_member_of_domain_region	04314522	1
01881857	_member_of_domain_region	07800487	0
08766988	_member_of_domain_region	09222742	1
09368224	_derivationally_related_form	02599207	0
02136271	_derivationally_related_form	04069276	1
04299699	_also_see	09154178	0
04010348	_hypernym	02720725	1
08095647	_member_of_domain_region	08095647	0
08860123	_member_of_domain_region	08504851	1
02437825	_member_of_domain_region	01628450	0
02379753	_derivationally_related_form	00212205	1
06369829	_has_part	07842753	0
04733204	_derivationally_related_form	02262542	1
13044778	_member_of_domain_region	01273263	0
13060689	_member_meronym	13060912	1
01042764	_has_part	09292751	0
04473432	_derivationally_related_form	01953810	1
02596381	_synset_domain_topic_of	04606014	0
07229747	_hypernym	07229530	1
01881857	_member_meronym	09102517	0
08780881	_has_part	08783286	1
03192347	_verb_group	03769967	0
14686913	_derivationally_related_form	00442267	1
10069645	_has_part	04115456	0
13054211	_member_meronym	13055009	1
13074084	_instance_hypernym	10055847	0
12039743	_member_meronym	12045352	1
02423022	_instance_hypernym	01630284	0
01915131	_derivationally_related_form	02898711	1
02535909	_also_see	14705533	0
08305942	_hypernym	08168978	1
13066129	_verb_group	01050896	0
08860123	_member_of_domain_region	03702719	1
10160624	_instance_hypernym	02934168	0
07673397	_hypernym	07672135	1
01475421	_similar_to	09701603	0
03519578	_hypernym	03519981	1
15155891	_synset_domain_topic_of	15071684	0
01640383	_member_meronym	01640567	1
02362569	_member_of_domain_usage	02649082	0
02641608	_member_meronym	02651846	1
07752264	_instance_hypernym	03093574	0
01465994	_member_meronym	01467986	1
07775905	_also_see	13040303	0
03467517	_hypernym	04338517	1
01442591	_similar_to	09111168	0
13030852	_hypernym	13028611	1
04497962	_member_of_domain_region	07618871	0
02412440	_derivationally_related_form	00058265	1
10550090	_synset_domain_topic_of	03222959	0
08174398	_member_meronym	08780881	1
10131815	_instance_hypernym	02650928	0
02854739	_hypernym	04508489	1
02580991	_verb_group	03198951	0
02389346	_verb_group	02389592	1
00619183	_also_see	09393605	0
14807929	_hypernym	05407119	1
01942177	_instance_hypernym	05345581	0
12985236	_hypernym	11592146	1
09351647	_has_part	02989685	0
14859622	_hypernym	14961512	1
15169421	_also_see	07380144	0
02505809	_member_meronym	02505998	1
13005329	_member_meronym	01465713	0
06871384	_derivationally_related_form	01050896	1
02888000	_synset_domain_topic_of	02408217	0
13016457	_member_meronym	13232515	1
00201058	_has_part	04728376	0
02659808	_hypernym	02658079	1
02349980	_member_of_domain_region	00125633	0
09070793	_has_part	02956500	1
08563180	_verb_group	02458356	0
00432839	_derivationally_related_form	14489113	1
01634092	_member_meronym	01449857	0
09368224	_derivationally_related_form	08641113	1
01885367	_also_see	07775905	0
00680485	_derivationally_related_form	06211078	1
02529515	_also_see	02832168	0
02340186	_hypernym	02339922	1
06349220	_instance_hypernym	02356381	0
02175958	_derivationally_related_form	04989657	1
15155891	_verb_group	03324928	0
00086835	_derivationally_related_form	00824054	1
09102517	_instance_hypernym	00190999	0
13000372	_member_meronym	13005568	1
09935233	_derivationally_related_form	02437825	0
09117351	_has_part	09192973	1
08404895	_member_of_domain_usage	02485451	0
09761068	_derivationally_related_form	02470685	1
03976268	_member_of_domain_usage	04535524	0
02399000	_hypernym	02394477	1
04242704	_similar_to	03962525	0
13753585	_hypernym	13745420	1
01453330	_member_of_domain_region	10244913	0
10621514	_derivationally_related_form	00849294	1
01480880	_similar_to	08935212	0
09095023	_member_of_domain_region	01283935	1
03654086	_member_meronym	04018399	0
08860123	_member_of_domain_region	09351547	1
02751782	_member_of_domain_usage	13030438	0
00772813	_derivationally_related_form	00963283	1
01890718	_also_see	02394822	0
09284015	_derivationally_related_form	01567888	1
08570758	_also_see	10311661	0
02071294	_hypernym	02068974	1
09177385	_instance_hypernym	03755545	0
07622261	_derivationally_related_form	01265740	1
02448318	_synset_domain_topic_of	02328270	0
08095647	_member_meronym	08096474	1
13066631	_derivationally_related_form	08348815	0
00410406	_derivationally_related_form	09738708	1
09222742	_synset_domain_topic_of	08553280	0
02549533	_member_meronym	02549796	1
05638778	_instance_hypernym	09877443	0
06845599	_member_of_domain_usage	14753414	1
04987620	_similar_to	12982723	0
06695862	_derivationally_related_form	00880227	1
05236029	_synset_domain_topic_of	15169136	0
00883635	_hypernym	00883226	1
02661317	_similar_to	08504594	0
02649218	_hypernym	02648625	1
04603872	_member_of_domain_region	03324928	0
01645634	_hypernym	01626134	1
02613960	_instance_hypernym	08349548	0
14836468	_hypernym	14732946	1
03586631	_verb_group	13623054	0
09709001	_hypernym	09708405	1
07927197	_has_part	04577293	0
08554440	_hypernym	08553535	1
02595569	_instance_hypernym	03966976	0
13077033	_hypernym	12992868	1
07613671	_instance_hypernym	13802098	0
13043516	_hypernym	11590783	1
02687992	_verb_group	13802098	0
13575433	_derivationally_related_form	00458754	1
02546873	_member_meronym	09203217	0
01398941	_derivationally_related_form	04049405	1
02659808	_derivationally_related_form	02499434	0
02528534	_member_meronym	02541431	1
12063414	_member_of_domain_region	02458356	0
08801678	_member_of_domain_region	06964247	1
00651954	_similar_to	02535909	0
08368308	_derivationally_related_form	02875499	1
04229107	_member_of_domain_region	08404895	0
02425086	_hypernym	02419796	1
11409059	_also_see	01438720	0
01640383	_member_meronym	01640846	1
02343187	_similar_to	01821634	0
08563627	_has_part	09057311	1
02509694	_also_see	02136285	0
08801099	_member_meronym	09696124	1
14599168	_has_part	03650173	0
01190840	_derivationally_related_form	07891726	1
09122968	_hypernym	01844859	0
09301249	_instance_hypernym	09241247	1
12082593	_hypernym	01442591	0
01883212	_member_meronym	01883513	1
08563180	_instance_hypernym	00923321	0
09071690	_has_part	09378014	1
02652979	_member_of_domain_usage	09682803	0
08342039	_hypernym	08339454	1
09098721	_member_of_domain_region	14732946	0
04353016	_hypernym	04352070	1
02133704	_member_of_domain_usage	02261642	0
13070003	_hypernym	11590783	1
00858377	_member_of_domain_usage	09418484	0
02607630	_member_meronym	02609466	1
03757925	_instance_hypernym	07667326	0
13039870	_member_meronym	13040108	1
15155891	_derivationally_related_form	13752911	0
02535349	_member_meronym	02535537	1
01896031	_member_meronym	01634092	0
00105778	_derivationally_related_form	09930876	1
01440949	_verb_group	02621721	0
09682803	_derivationally_related_form	08095647	1
07927197	_member_meronym	01635343	0
01890860	_hypernym	01889520	1
04443257	_member_of_domain_region	09134386	0
02936020	_derivationally_related_form	06321702	1
00085626	_instance_hypernym	08766988	0
15169248	_hypernym	15228378	1
01442591	_member_meronym	01126335	0
03933529	_derivationally_related_form	02331175	1
00089657	_member_of_domain_region	05638778	0
10272171	_hypernym	09886010	1
02535909	_instance_hypernym	01277755	0
14599168	_hypernym	14739360	1
13039553	_has_part	09714120	0
13060451	_member_meronym	13062112	1
02967626	_synset_domain_topic_of	02934168	0
00252710	_derivationally_related_form	15147850	1
01294791	_similar_to	06883073	0
02521241	_member_meronym	02525543	1
07613671	_has_part	01629276	0
10146927	_derivationally_related_form	00899597	1
00459114	_synset_domain_topic_of	03222959	0
05951969	_derivationally_related_form	10306279	1
09124039	_verb_group	05407119	0
03315644	_derivationally_related_form	01271189	1
02595339	_member_of_domain_region	09692624	0
02435853	_hypernym	02399000	1
06776783	_synset_domain_topic_of	02540670	0
06845599	_member_of_domain_usage	03295357	1
03962525	_member_of_domain_usage	02630052	0
04764741	_derivationally_related_form	00485711	1
09192973	_also_see	06369829	0
08723006	_member_of_domain_region	08321469	1
01295918	_instance_hypernym	01874784	0
09052314	_instance_hypernym	09044862	1
08339454	_has_part	14487184	0
12083339	_member_meronym	12083591	1
14411243	_member_meronym	13042814	0
09060768	_has_part	09358096	1
09545324	_member_of_domain_region	07573241	0
09044862	_has_part	09067277	1
13024012	_derivationally_related_form	02062744	0
06214744	_derivationally_related_form	00408852	1
09356080	_verb_group	02458135	0
13037124	_hypernym	11592146	1
05385363	_hypernym	01844859	0
00713250	_derivationally_related_form	01266895	1
10102369	_also_see	01443537	0
06845599	_member_of_domain_usage	14747168	1
01883920	_member_of_domain_region	02608004	0
08801678	_member_of_domain_region	08541609	1
01644900	_hypernym	13074084	0
13298935	_hypernym	13298701	1
13005329	_member_of_domain_usage	02281485	0
02409202	_hypernym	02407959	1
09151516	_member_of_domain_usage	01042764	0
08860123	_member_of_domain_region	06699225	1
09234104	_derivationally_related_form	02952109	0
00105778	_derivationally_related_form	00427580	1
04577293	_instance_hypernym	10224098	0
07858595	_derivationally_related_form	02195470	1
12963140	_member_of_domain_region	13076181	0
13015229	_hypernym	11592146	1
15171008	_similar_to	09114696	0
08174398	_member_meronym	09039411	1
02031622	_instance_hypernym	15298507	0
00419137	_derivationally_related_form	07443210	1
02687992	_member_meronym	09458791	0
06845599	_member_of_domain_usage	03155334	1
01942177	_also_see	10198437	0
05716744	_derivationally_related_form	02196690	1
09098721	_synset_domain_topic_of	01173826	0
02420789	_derivationally_related_form	00719705	1
02619738	_also_see	02502514	0
01468238	_hypernym	01466257	1
02564130	_verb_group	09151516	0
00575970	_derivationally_related_form	15055633	1
00211396	_synset_domain_topic_of	10610465	0
09232165	_instance_hypernym	09475292	1
08787466	_instance_hypernym	04947628	0
08124971	_has_part	08125722	1
02328270	_verb_group	04443918	0
12998349	_member_meronym	13074084	1
01628450	_has_part	01337653	0
08641113	_derivationally_related_form	10352299	1
12063414	_member_of_domain_usage	07800487	0
06201908	_derivationally_related_form	00680346	1
08785958	_synset_domain_topic_of	06366581	0
00880227	_derivationally_related_form	06695579	1
09714120	_member_meronym	09714120	0
08984788	_has_part	09453566	1
08082236	_member_of_domain_usage	00855295	0
06845599	_member_of_domain_usage	04006953	1
09123809	_member_of_domain_region	05959954	0
02066707	_hypernym	02062744	1
09222742	_instance_hypernym	00854150	0
08929922	_member_of_domain_region	13753274	1
01050896	_also_see	09701603	0
01126846	_hypernym	01127411	1
02621721	_verb_group	02620033	0
06413889	_derivationally_related_form	07009946	1
09326467	_member_of_domain_region	09292751	0
12968408	_member_meronym	12970379	1
01873310	_member_meronym	01466828	0
09127461	_instance_hypernym	09399592	1
02592607	_member_meronym	08221348	0
00883226	_derivationally_related_form	07230089	1
01634092	_hypernym	08303275	0
00135285	_derivationally_related_form	06372095	1
03352961	_member_of_domain_usage	09351647	0
10490421	_hypernym	09841188	1
07573241	_synset_domain_topic_of	00038687	0
04051068	_hypernym	02673637	1
01443126	_has_part	13802098	0
02340930	_hypernym	02339376	1
09453288	_instance_hypernym	06263609	0
08929922	_member_of_domain_region	06964901	1
00223854	_instance_hypernym	10641223	0
02593863	_member_meronym	02596888	1
09313716	_member_meronym	14752057	0
06845599	_member_of_domain_usage	04476633	1
10079893	_instance_hypernym	00495808	0
09119277	_has_part	04604009	1
12061104	_synset_domain_topic_of	00458754	0
08674970	_derivationally_related_form	02468965	1
13064678	_synset_domain_topic_of	10613387	0
00105554	_derivationally_related_form	00431005	1
09268927	_hypernym	02369012	0
09038990	_has_part	09719430	1
08396537	_member_of_domain_usage	09192973	0
09243405	_instance_hypernym	09215664	1
03661861	_member_of_domain_usage	00856847	0
15159583	_derivationally_related_form	00734927	1
01884348	_hypernym	00627437	0
02633677	_hypernym	02632989	1
00854150	_also_see	00619183	0
00485711	_derivationally_related_form	04764741	1
03966976	_synset_domain_topic_of	01876180	0
01896031	_has_part	01897991	1
02356381	_hypernym	02888000	0
01696135	_derivationally_related_form	04694809	1
01743531	_also_see	02331479	0
03670622	_hypernym	02716866	1
02609169	_member_of_domain_region	01295918	0
09087599	_has_part	09368479	1
09397391	_similar_to	10485440	0
08149781	_hypernym	08081668	1
09083390	_hypernym	09458791	0
09260466	_hypernym	09416076	1
02631238	_similar_to	04341133	0
13024763	_member_meronym	13024967	1
09343422	_also_see	08504594	0
02534352	_member_meronym	02535349	1
09693372	_verb_group	01128071	0
01891438	_member_meronym	01891633	1
03644378	_instance_hypernym	10470779	0
03612814	_hypernym	03990474	1
10489944	_also_see	09219078	0
09044862	_has_part	09111366	1
02136285	_member_of_domain_region	09053019	0
03662016	_hypernym	03681148	1
01282466	_instance_hypernym	03909835	0
02396796	_hypernym	02395003	1
04473432	_derivationally_related_form	09356080	0
09082540	_has_part	09084483	1
01635343	_synset_domain_topic_of	10311661	0
10318892	_derivationally_related_form	01743531	1
15273955	_synset_domain_topic_of	13497135	0
12978969	_hypernym	11590783	1
14672224	_member_of_domain_region	10311661	0
06845599	_member_of_domain_usage	04443588	1
12978381	_instance_hypernym	07066459	0
02989475	_hypernym	02996840	1
05949937	_member_of_domain_region	10160624	0
06344461	_hypernym	06343971	1
09801102	_verb_group	01279120	0
01874928	_hypernym	01874434	1
09365730	_has_part	15160418	0
15228378	_hypernym	15129927	1
02640626	_member_meronym	02981024	0
10352299	_derivationally_related_form	08641113	1
13319512	_synset_domain_topic_of	01896031	0
02068735	_member_meronym	02069569	1
13752911	_instance_hypernym	04603872	0
02324045	_has_part	02158739	1
02121234	_member_of_domain_usage	03769967	0
02356108	_member_meronym	02355477	1
02625418	_derivationally_related_form	01291674	0
03362393	_hypernym	02715941	1
02331175	_member_meronym	02331479	0
05681117	_has_part	05768553	1
09368224	_synset_domain_topic_of	13505987	0
07427337	_derivationally_related_form	00223500	1
02328270	_derivationally_related_form	02390101	0
10582154	_derivationally_related_form	02540670	1
09343422	_member_meronym	02888000	0
09078231	_member_of_domain_region	02581957	1
09365730	_has_part	09807754	0
02507337	_member_meronym	02509694	1
09102517	_also_see	02623170	0
10268299	_derivationally_related_form	02614387	1
09132778	_also_see	01324799	0
07443210	_derivationally_related_form	00441212	1
13529616	_member_of_domain_region	01650167	0
08780881	_member_of_domain_region	09542697	1
09131428	_verb_group	10113362	0
02015168	_derivationally_related_form	00057306	1
13048666	_hypernym	03093574	0
09039411	_member_of_domain_region	06340047	1
00827379	_similar_to	02448318	0
02430191	_derivationally_related_form	01081456	1
03757925	_similar_to	03186005	0
06845599	_member_of_domain_usage	03588668	1
12082593	_member_meronym	10102369	0
06295235	_member_of_domain_usage	09212572	1
14607521	_hypernym	12979129	0
02335349	_member_meronym	02338029	1
04586932	_instance_hypernym	10489944	0
13007770	_hypernym	11592146	1
13265904	_member_of_domain_region	02625418	0
07679356	_derivationally_related_form	01337653	1
08557482	_also_see	13066631	0
02331309	_hypernym	02331046	1
02367993	_instance_hypernym	02888000	0
00680346	_hypernym	00680145	1
01285305	_instance_hypernym	06349220	0
08986066	_instance_hypernym	08691669	1
01285305	_synset_domain_topic_of	02896789	0
11517494	_derivationally_related_form	00073584	1
12972629	_member_meronym	02380009	0
09067277	_has_part	09373716	1
03757925	_member_of_domain_region	07667326	0
00842692	_derivationally_related_form	01186428	1
13753740	_member_meronym	09122968	0
00492677	_derivationally_related_form	08615374	1
10641223	_synset_domain_topic_of	01164874	0
13005329	_hypernym	12998815	1
10550090	_hypernym	04349701	0
07653394	_hypernym	07649854	1
01349493	_synset_domain_topic_of	10595361	0
10382825	_derivationally_related_form	03854065	1
09091398	_has_part	01454856	0
02652668	_hypernym	02552171	1
01696648	_hypernym	05407119	0
00088725	_derivationally_related_form	01215137	1
12073007	_verb_group	13265904	0
02453890	_member_meronym	02456776	1
01444164	_synset_domain_topic_of	02419515	0
09400667	_instance_hypernym	09440186	1
06263609	_hypernym	03997980	0
01158572	_derivationally_related_form	13451804	1
15273955	_instance_hypernym	02641379	0
07779747	_hypernym	07775905	1
01385920	_has_part	01548301	0
01653026	_hypernym	01639765	1
06964247	_instance_hypernym	09222742	0
02358091	_hypernym	02355227	1
01465713	_also_see	09082540	0
04947628	_hypernym	04947186	1
06295235	_similar_to	13074084	0
09075842	_has_part	09378014	1
02458135	_member_meronym	03670456	0
08860123	_member_of_domain_region	07450343	1
02102605	_instance_hypernym	00088713	0
00040188	_derivationally_related_form	00256961	1
09145851	_member_of_domain_usage	01882125	0
02411705	_has_part	02439568	1
01337653	_member_of_domain_usage	10244913	0
09044862	_has_part	09059274	1
08764561	_instance_hypernym	00088713	0
00991838	_derivationally_related_form	14864360	1
07803408	_instance_hypernym	00019128	0
02510455	_hypernym	02507649	1
13010219	_also_see	06767777	0
02546075	_derivationally_related_form	10183757	1
02082056	_member_meronym	03691459	0
02553196	_member_meronym	02621721	1
09134999	_hypernym	03976268	0
00191517	_derivationally_related_form	13496771	1
03769967	_also_see	04305323	0
02400139	_member_meronym	02409702	1
15298507	_member_of_domain_region	13298011	0
14841267	_derivationally_related_form	02112891	1
01876180	_verb_group	07623933	0
01167981	_derivationally_related_form	08253815	1
09714120	_member_meronym	08813807	0
00492677	_derivationally_related_form	04764741	1
02641608	_also_see	02355477	0
02341475	_hypernym	02339376	1
13026146	_verb_group	02499700	0
10162354	_derivationally_related_form	03497657	1
09770949	_member_of_domain_usage	09168707	0
02130308	_hypernym	02127808	1
01885367	_member_of_domain_region	00088713	0
01141938	_derivationally_related_form	02062744	1
03380134	_has_part	05273684	0
07590611	_hypernym	07588947	1
01873310	_also_see	02281485	0
02380009	_derivationally_related_form	10525617	1
09879297	_derivationally_related_form	01635343	0
01888520	_member_meronym	01893535	1
10131815	_has_part	09129926	0
01560369	_derivationally_related_form	00360242	1
02369012	_verb_group	03962525	0
01648494	_member_meronym	01648620	1
02031622	_synset_domain_topic_of	02652979	0
09194357	_has_part	09357847	1
06630017	_derivationally_related_form	09368224	0
12967776	_hypernym	11590783	1
00619183	_member_of_domain_usage	01337653	0
08932568	_has_part	08933621	1
09879297	_instance_hypernym	01173826	0
01445027	_derivationally_related_form	14757547	1
10224098	_similar_to	00431005	0
02457756	_member_meronym	02457945	1
08729626	_also_see	09368224	0
13660178	_derivationally_related_form	00491689	1
07842753	_derivationally_related_form	03198951	0
01130607	_derivationally_related_form	04051825	1
13529616	_instance_hypernym	02586865	0
06845599	_member_of_domain_usage	15071684	1
09326467	_synset_domain_topic_of	13393427	0
02602212	_derivationally_related_form	07515974	1
10717921	_similar_to	01245637	0
03497657	_has_part	02902079	1
01635343	_member_of_domain_usage	08143486	0
09103943	_has_part	09459557	1
01628450	_has_part	02362569	0
00161739	_derivationally_related_form	01696648	1
07927197	_instance_hypernym	01274909	0
08133189	_hypernym	08337324	1
01449586	_synset_domain_topic_of	06776783	0
00799537	_derivationally_related_form	02414473	1
08697827	_also_see	04205318	0
13205482	_member_meronym	13210006	1
06630017	_hypernym	09233284	0
08860123	_member_of_domain_region	04441528	1
05614657	_also_see	08813807	0
09109444	_has_part	09109882	1
08772551	_hypernym	02446352	0
01305361	_hypernym	02085742	1
10055847	_member_meronym	03813834	0
02336011	_hypernym	02329401	1
09801102	_has_part	02354621	0
03970363	_hypernym	02896442	1
13076181	_similar_to	14894140	0
03061081	_derivationally_related_form	05996646	1
04586932	_instance_hypernym	01086945	0
13486270	_derivationally_related_form	00442267	1
02596381	_synset_domain_topic_of	02576223	0
01382818	_derivationally_related_form	01639765	1
06862202	_synset_domain_topic_of	02549989	0
02673480	_hypernym	02832168	1
09082540	_member_meronym	09070487	0
08860123	_member_of_domain_region	07635155	1
09288946	_derivationally_related_form	03612134	0
13006377	_hypernym	11592146	1
02509197	_derivationally_related_form	02346627	0
01075117	_hypernym	00954086	1
00294190	_member_of_domain_usage	08348815	0
02784732	_derivationally_related_form	01273263	1
15183802	_also_see	02062991	0
06295235	_member_of_domain_usage	03885028	1
13796779	_also_see	01629276	0
00089154	_derivationally_related_form	14283632	1
09058071	_also_see	09313716	0
02907985	_instance_hypernym	04511002	1
03718581	_instance_hypernym	02546873	0
15058163	_hypernym	15057744	1
03922412	_member_of_domain_region	06767777	0
08910668	_has_part	09237404	1
02612393	_instance_hypernym	09368224	0
14276936	_hypernym	14070360	1
13319512	_instance_hypernym	01291674	0
08214470	_hypernym	08190754	1
08790953	_synset_domain_topic_of	03534890	0
13038944	_member_meronym	13046285	1
12975982	_instance_hypernym	01890718	0
00366858	_derivationally_related_form	15055633	1
00375021	_instance_hypernym	01274171	0
08860123	_member_of_domain_region	13359941	1
13066129	_synset_domain_topic_of	01440949	0
02652979	_member_meronym	02653359	1
08797254	_synset_domain_topic_of	09343422	0
13029946	_member_meronym	13030157	1
08782976	_also_see	01086945	0
09114696	_has_part	09418484	1
04305323	_member_of_domain_region	02967626	0
03914919	_derivationally_related_form	01543731	1
05385363	_member_of_domain_region	02068206	0
09109444	_has_part	09441725	1
09098721	_verb_group	13497135	0
05410646	_hypernym	05407119	1
03644378	_synset_domain_topic_of	02364221	0
13063269	_hypernym	12992868	1
00375021	_member_of_domain_usage	01549314	0
03928814	_hypernym	03614007	1
07703889	_also_see	01654957	0
02483915	_member_meronym	02484473	1
09326467	_member_meronym	02446352	0
02068206	_hypernym	02066707	1
12058822	_similar_to	03654086	0
02654425	_hypernym	02652668	1
02437825	_member_of_domain_usage	09326467	0
06845599	_member_of_domain_usage	03554131	1
05385363	_similar_to	08800676	0
00483656	_derivationally_related_form	06863751	1
02423022	_member_of_domain_usage	09177385	0
13063046	_hypernym	11594676	1
06321702	_has_part	02456275	0
00604617	_derivationally_related_form	04718563	1
01164874	_hypernym	02136285	0
06295235	_member_of_domain_usage	04323819	1
02343487	_member_meronym	00495808	0
01144550	_derivationally_related_form	02443484	1
09959258	_member_of_domain_region	01454856	0
09049599	_has_part	09103943	1
02564130	_verb_group	01042764	0
13003522	_hypernym	12998815	1
10079893	_member_of_domain_region	15165490	0
14974264	_derivationally_related_form	01268457	1
10224098	_member_of_domain_region	02393300	0
08860123	_member_of_domain_region	07889814	1
02559232	_derivationally_related_form	09158268	0
02355477	_hypernym	02355227	1
09083390	_member_meronym	03325769	0
09060768	_has_part	09326467	1
13753740	_has_part	07380144	0
06510977	_derivationally_related_form	02896789	1
08221348	_hypernym	02362569	0
04248851	_derivationally_related_form	01480770	1
02592244	_member_meronym	13298011	0
01758308	_derivationally_related_form	01173813	1
08396537	_verb_group	01128071	0
14705718	_derivationally_related_form	01354006	1
00052146	_member_of_domain_usage	08789605	0
09044862	_member_of_domain_region	08303692	1
10595361	_synset_domain_topic_of	04535524	0
12992464	_member_meronym	11592146	1
02415435	_verb_group	03718581	0
03747746	_hypernym	03771443	1
03586631	_member_of_domain_region	02369012	0
13031956	_hypernym	11592146	1
03093574	_member_meronym	08221348	0
01320513	_derivationally_related_form	10587227	1
06630017	_synset_domain_topic_of	06369829	0
02485451	_derivationally_related_form	01164874	1
01449857	_member_meronym	00038687	0
01193099	_derivationally_related_form	00840630	1
10470779	_has_part	09288946	0
13210006	_hypernym	13167078	1
01282711	_hypernym	08337324	0
03550533	_hypernym	02718469	1
02398463	_verb_group	01844859	0
02590237	_member_meronym	02592244	1
03661861	_has_part	01050896	0
02373093	_member_meronym	02373601	1
09371816	_derivationally_related_form	02423022	0
12982103	_hypernym	11590783	1
08349548	_member_of_domain_usage	13881512	0
04353410	_hypernym	03828465	1
03909835	_hypernym	03966976	0
02072355	_member_meronym	02072493	1
02346627	_hypernym	00356367	0
09711132	_hypernym	09710164	1
07634901	_similar_to	01295918	0
01290435	_instance_hypernym	01075117	1
06295235	_verb_group	03918297	0
09250165	_instance_hypernym	09453008	1
02627292	_derivationally_related_form	02608004	0
02156063	_derivationally_related_form	13773361	1
02447896	_has_part	02582591	0
09114696	_has_part	09228619	1
01453188	_member_of_domain_usage	09091398	0
01284444	_instance_hypernym	00223983	1
00089657	_hypernym	06366581	0
09044862	_has_part	09089139	1
12982723	_member_of_domain_usage	00125633	0
02380980	_hypernym	01766952	1
09048127	_derivationally_related_form	02331479	0
02553196	_member_meronym	02618244	1
03093184	_has_part	13456715	0
12996225	_member_meronym	13065902	1
02449921	_member_of_domain_region	02133704	0
06367373	_derivationally_related_form	01635176	1
05959954	_verb_group	10744164	0
13068434	_hypernym	13066129	1
01446760	_has_part	00252710	0
02325211	_member_meronym	02325366	1
03074922	_member_of_domain_usage	02629410	0
02554235	_derivationally_related_form	10663315	1
12058822	_synset_domain_topic_of	02137549	0
02574651	_member_meronym	02574910	1
09478355	_similar_to	03198951	0
06295235	_member_of_domain_usage	09269972	1
06263609	_member_of_domain_usage	00991838	0
01546660	_member_meronym	01547459	1
09155986	_derivationally_related_form	14040660	0
00288486	_derivationally_related_form	01928730	1
13030852	_member_of_domain_region	12977565	0
09048880	_has_part	09092497	1
02892948	_has_part	02546873	0
06295235	_member_of_domain_usage	01042764	1
09111955	_member_of_domain_region	07722485	0
00719705	_derivationally_related_form	02461063	1
15155891	_member_of_domain_usage	02582591	0
02590910	_derivationally_related_form	10788852	1
08797254	_also_see	09343422	0
00964105	_instance_hypernym	00962129	1
01324799	_synset_domain_topic_of	10659393	0
09141526	_has_part	09388121	1
09719430	_hypernym	09134999	0
10792335	_derivationally_related_form	01778017	1
02331479	_member_of_domain_usage	09545324	0
02597367	_hypernym	02594250	1
09731906	_member_meronym	02595569	0
02346315	_member_meronym	02346823	1
00800121	_also_see	02606590	0
00201058	_derivationally_related_form	01972131	1
07775905	_has_part	02632239	0
09152944	_has_part	09153710	1
01915365	_member_of_domain_region	10460033	0
02564403	_hypernym	02562315	1
03654086	_member_meronym	04993882	0
13030157	_member_meronym	13030438	1
02411427	_has_part	10412910	0
15165289	_has_part	15169136	1
09157163	_instance_hypernym	00991838	0
02133704	_hypernym	02131653	1
09124039	_verb_group	00419375	0
09044862	_has_part	09075842	1
01295918	_has_part	09111955	0
00962722	_derivationally_related_form	02583780	1
02629410	_hypernym	03186005	0
02072159	_derivationally_related_form	00914343	1
13497135	_hypernym	10613387	0
08932568	_has_part	08933940	1
09076982	_instance_hypernym	02619738	0
10075529	_derivationally_related_form	06371413	1
08787466	_verb_group	13533470	0
01883513	_hypernym	01874434	1
02797021	_similar_to	00795161	0
05010801	_derivationally_related_form	02675458	1
09398217	_has_part	04341133	0
01649948	_member_meronym	01650167	1
04443918	_verb_group	09243209	0
09138935	_has_part	09320985	1
00252710	_also_see	01890860	0
09237076	_has_part	09405169	1
15155891	_instance_hypernym	02499434	0
02688623	_derivationally_related_form	07802417	1
12041446	_has_part	09039260	0
04236001	_derivationally_related_form	02701445	1
09682803	_member_meronym	02601767	0
03200357	_hypernym	03895866	1
08877807	_derivationally_related_form	03224032	0
03718056	_hypernym	03214670	1
06929742	_also_see	02563497	0
01644104	_hypernym	01626134	1
09867154	_also_see	09095023	0
09044862	_has_part	09078231	1
09801102	_derivationally_related_form	01273263	0
00751389	_derivationally_related_form	00848466	1
09397391	_derivationally_related_form	12048772	0
09219078	_instance_hypernym	09403734	1
02648456	_verb_group	09244972	0
02546744	_member_meronym	02546873	1
13226698	_has_part	02832168	0
05043973	_derivationally_related_form	02112029	1
13030852	_member_of_domain_usage	02967626	0
01649948	_member_meronym	01652163	1
09157021	_verb_group	13529616	0
09078231	_derivationally_related_form	02738760	1
02630052	_member_meronym	02102605	0
02989893	_hypernym	02996840	1
01896031	_member_of_domain_usage	02448318	0
08860123	_member_of_domain_usage	10548227	1
02650928	_derivationally_related_form	12979478	0
