# Supplementary material
Source: ML conference proceedings conference paper supplement (https://proceedings.neurips.cc/paper_files/paper/2021/hash/0fd600c953cde8121262e322ef09f70e-Abstract.html)
Supplement: Supplementary file 1 [file 0fd600c953cde8121262e322ef09f70e-Supplemental.zip › Supplementary_Material_Paper_8745/data/GraIL-BM_WN18RR_v3/test/test-random-sample/test9.txt]

02521241	_member_meronym	02521916	1
01241594	_member_of_domain_usage	00125633	0
02341974	_hypernym	02339376	1
13387209	_also_see	03867515	0
03109350	_instance_hypernym	04511002	1
02356381	_member_of_domain_usage	09945603	0
00053609	_derivationally_related_form	00426958	1
02073041	_member_of_domain_region	03970363	0
01631759	_hypernym	01626134	1
08221348	_has_part	02458356	0
08766988	_member_of_domain_region	09877443	1
01442591	_has_part	01653975	0
01215137	_derivationally_related_form	06547832	1
03325769	_hypernym	02888000	0
02923510	_derivationally_related_form	06234825	1
09122968	_similar_to	10659393	0
08897065	_has_part	09168020	1
04947628	_similar_to	09545324	0
00014742	_hypernym	00014405	1
02650928	_synset_domain_topic_of	01304121	0
00211108	_derivationally_related_form	13460568	1
02601921	_also_see	01446760	0
02354781	_hypernym	02353861	1
02066450	_derivationally_related_form	02654256	0
14894140	_hypernym	14727670	1
09264116	_member_meronym	01475648	0
02441723	_member_meronym	02442845	1
03192347	_instance_hypernym	08772551	0
00963283	_derivationally_related_form	06790042	1
08349548	_member_meronym	07913081	0
02832818	_derivationally_related_form	02720201	1
02562315	_instance_hypernym	03997980	0
01153305	_derivationally_related_form	00369194	1
03922412	_derivationally_related_form	13003254	0
02601589	_member_meronym	02601921	1
02483224	_hypernym	09945603	0
12043248	_member_meronym	12043444	1
02341108	_verb_group	08769645	0
01269360	_instance_hypernym	00223983	1
02514575	_hypernym	09692624	0
00702226	_derivationally_related_form	04438304	1
06963951	_synset_domain_topic_of	01889074	0
02399000	_derivationally_related_form	01174555	1
12063414	_similar_to	06147873	0
09044862	_has_part	09110422	1
01480880	_member_of_domain_region	13048666	0
02453890	_member_meronym	02457586	1
01645466	_derivationally_related_form	02410509	0
01292727	_hypernym	01292534	1
15146004	_has_part	07573241	0
02528534	_member_meronym	02540255	1
08570758	_similar_to	02133902	0
02583139	_derivationally_related_form	00962129	1
14599168	_also_see	01291674	0
02927512	_derivationally_related_form	09044862	1
02062744	_also_see	02369012	0
00492677	_also_see	02111684	1
02981024	_member_of_domain_region	07573241	0
02593863	_member_meronym	02595902	1
02174461	_instance_hypernym	06349220	0
00210738	_derivationally_related_form	13077033	1
03098140	_member_of_domain_region	01454856	0
09044862	_member_of_domain_region	08122009	1
08697827	_member_of_domain_usage	12977795	0
03299648	_hypernym	03214670	1
01465713	_similar_to	03928814	0
04300080	_derivationally_related_form	01594362	1
01324799	_member_meronym	02652979	0
09401474	_instance_hypernym	09403734	1
09084483	_has_part	04606014	0
09052652	_member_meronym	10802283	1
02134084	_similar_to	01278232	0
02398854	_derivationally_related_form	10271677	1
01241594	_similar_to	02706373	0
06778102	_derivationally_related_form	00853633	1
08790953	_instance_hypernym	09155986	0
03829085	_hypernym	02718811	1
12041446	_hypernym	09701603	0
01478300	_member_meronym	01478511	1
11409059	_member_of_domain_usage	01889074	0
12982723	_hypernym	11592146	1
13298011	_synset_domain_topic_of	02564130	0
01454856	_hypernym	02552171	1
02394822	_similar_to	04341133	0
02870092	_derivationally_related_form	06413889	1
02341108	_member_of_domain_usage	13024967	0
04186848	_derivationally_related_form	01560369	1
13802098	_verb_group	02641379	0
06845599	_member_of_domain_usage	02705651	1
00651954	_hypernym	01650167	0
01262936	_derivationally_related_form	07738353	1
13044778	_similar_to	03813834	0
08564307	_has_part	09109444	1
02362721	_similar_to	04443257	0
01042764	_hypernym	01041968	1
05273684	_verb_group	09368224	0
08860123	_member_of_domain_region	04240576	1
10659393	_has_part	01439121	0
09169801	_instance_hypernym	08505573	1
02444103	_member_of_domain_usage	00858377	0
07450343	_derivationally_related_form	00855295	1
02363818	_member_meronym	02328270	0
12972818	_hypernym	11594676	1
02441326	_derivationally_related_form	05615147	0
14607521	_derivationally_related_form	00264875	1
12977795	_member_of_domain_usage	05959954	0
15155220	_has_part	15227846	1
06310945	_derivationally_related_form	02124623	0
09131654	_has_part	09244972	1
09292751	_member_of_domain_region	01042764	0
05588174	_derivationally_related_form	02884456	1
02632239	_verb_group	04349701	0
09714120	_derivationally_related_form	08953324	1
09702134	_also_see	01277755	0
09141526	_has_part	09145083	1
10744164	_member_of_domain_region	13039553	0
01639369	_member_meronym	01642671	1
09719430	_also_see	03519981	0
00626800	_also_see	00625393	1
09397391	_synset_domain_topic_of	01324799	0
06845599	_member_of_domain_usage	04006727	1
03614007	_has_part	08944818	0
08381820	_hypernym	08381636	1
01084180	_derivationally_related_form	01844859	0
07556637	_derivationally_related_form	01167188	1
09201301	_member_meronym	09692624	0
00854150	_derivationally_related_form	10221312	1
13010219	_member_meronym	15183802	0
08136260	_hypernym	08348815	1
09157021	_also_see	02355477	0
10181990	_hypernym	10024119	1
07927197	_member_of_domain_usage	02367993	0
08860123	_member_of_domain_region	02463990	1
01320513	_synset_domain_topic_of	02608004	0
06845599	_member_of_domain_usage	03771066	1
12058822	_member_meronym	03962525	0
06621447	_derivationally_related_form	02797021	1
03691459	_member_of_domain_usage	09867154	0
12992464	_member_meronym	12975207	1
03093184	_also_see	03324928	0
09682291	_derivationally_related_form	02923510	1
02503313	_similar_to	09356639	0
02424085	_hypernym	02419796	1
01164874	_has_part	04107984	0
09119277	_has_part	09370383	1
02665282	_member_of_domain_region	12972414	0
08860123	_member_of_domain_region	07722485	1
01635343	_member_meronym	09100982	0
14487731	_derivationally_related_form	00492706	1
07803992	_derivationally_related_form	14672224	0
04762355	_derivationally_related_form	00625393	1
04107984	_member_of_domain_region	13533470	0
13016457	_member_meronym	13001743	1
12982723	_instance_hypernym	01654957	0
01303582	_instance_hypernym	00962722	1
02369012	_member_of_domain_region	15183802	0
02536165	_has_part	07796165	1
10595361	_member_meronym	01319874	0
02601344	_has_part	07784367	1
07842753	_member_of_domain_region	00089657	0
08416652	_hypernym	08251877	1
02888000	_verb_group	02073041	0
00963283	_derivationally_related_form	00963241	1
05385363	_member_meronym	04993882	0
02176747	_hypernym	02176261	1
02650928	_has_part	09089782	0
06214580	_derivationally_related_form	10619176	1
13556377	_instance_hypernym	06845599	0
07689217	_hypernym	07689003	1
07653394	_member_of_domain_usage	02342109	0
12970379	_member_meronym	12970560	1
01274171	_hypernym	03296759	0
10244913	_hypernym	09770949	1
09222742	_derivationally_related_form	02650928	0
08780881	_member_of_domain_region	07036862	1
08800676	_instance_hypernym	00585810	0
02066450	_member_meronym	02068735	1
01446760	_verb_group	00252710	0
09117351	_has_part	09123809	1
02351870	_instance_hypernym	02648456	0
04352070	_hypernym	02716205	1
13529616	_derivationally_related_form	01466828	0
13007417	_hypernym	12998815	1
09731906	_member_of_domain_usage	09114696	0
03854065	_hypernym	04586932	1
09229409	_member_of_domain_region	00858377	0
13002433	_member_meronym	13003522	1
09292751	_member_meronym	01466828	0
02655523	_hypernym	02652668	1
13024967	_hypernym	03470222	0
01245813	_derivationally_related_form	01078050	1
12062227	_similar_to	02648456	0
13077295	_derivationally_related_form	00210738	1
02062991	_has_part	02369012	0
08615638	_derivationally_related_form	01934427	1
15171008	_member_of_domain_region	10595361	0
08860123	_member_of_domain_region	07696527	1
09545324	_instance_hypernym	01274171	0
09078231	_member_of_domain_region	06938493	1
09418484	_similar_to	02599207	0
09048880	_has_part	09147964	1
00019128	_derivationally_related_form	04760771	0
08365855	_derivationally_related_form	09945603	1
03093184	_also_see	02364221	0
08505573	_hypernym	07941945	1
01915365	_member_of_domain_region	09268927	0
01523823	_derivationally_related_form	01244593	1
03296759	_derivationally_related_form	09177385	0
00366858	_derivationally_related_form	13572436	1
10142537	_has_part	02423022	0
01273016	_hypernym	01531742	1
05385363	_hypernym	02952109	0
14994328	_derivationally_related_form	00266586	1
01642671	_hypernym	02595569	0
09134386	_has_part	09192708	1
01874784	_synset_domain_topic_of	01385920	0
02353844	_derivationally_related_form	03427296	1
07803408	_has_part	02192383	0
12992464	_member_meronym	12992868	1
06966825	_member_of_domain_region	02156063	0
01953810	_derivationally_related_form	04473432	1
09452395	_member_of_domain_region	01446760	0
09071690	_has_part	09074431	1
02389346	_instance_hypernym	01194238	0
02635013	_member_meronym	02635154	1
02411705	_member_meronym	08136260	0
09117351	_member_of_domain_region	01294127	1
00457228	_instance_hypernym	12983404	0
02416104	_hypernym	02414578	1
01303582	_verb_group	09095023	0
15147850	_has_part	15146004	1
02398463	_synset_domain_topic_of	02137549	0
02456962	_hypernym	02453611	1
09365443	_instance_hypernym	01630284	0
13023292	_member_meronym	13024012	1
09731906	_hypernym	08214272	0
02470451	_member_meronym	02483915	1
02507337	_hypernym	02514575	0
02601589	_member_meronym	02601767	1
01883920	_synset_domain_topic_of	00374668	0
09150448	_instance_hypernym	08672738	1
08729626	_hypernym	09039260	0
06845599	_member_of_domain_usage	03748456	1
09313716	_member_of_domain_region	04760771	0
03599761	_derivationally_related_form	02461063	1
02419515	_instance_hypernym	02423022	0
02623170	_member_meronym	02623868	1
13003254	_instance_hypernym	09144117	0
08894456	_has_part	09430771	1
01268112	_derivationally_related_form	08804487	0
09416076	_hypernym	00019128	1
04205318	_hypernym	09076982	0
00963283	_derivationally_related_form	04879658	1
08396537	_has_part	02136285	0
02131418	_member_meronym	02133902	1
06883073	_member_of_domain_region	01294791	0
02509197	_hypernym	02507649	1
02721538	_member_of_domain_usage	01874784	0
01448291	_hypernym	01446589	1
01890718	_has_part	01442591	0
14894140	_derivationally_related_form	02192383	1
02419515	_synset_domain_topic_of	13226698	0
06295235	_member_of_domain_usage	03443912	1
07913081	_instance_hypernym	07913081	0
09139380	_instance_hypernym	08665504	1
15147850	_member_of_domain_region	00223983	0
02602405	_hypernym	02552171	1
02529111	_similar_to	04443918	0
03457686	_hypernym	03461385	1
01303582	_member_of_domain_region	09039260	0
02484975	_hypernym	02484473	1
03922412	_member_of_domain_usage	13533470	0
02449921	_member_meronym	02450034	1
02363818	_similar_to	00827379	0
13024967	_member_meronym	13025647	1
04205318	_member_of_domain_usage	03069752	0
06845599	_member_of_domain_usage	14753808	1
15169136	_similar_to	02563497	0
02112891	_similar_to	02111684	1
08640111	_derivationally_related_form	06845599	0
00624263	_derivationally_related_form	06372095	1
09945603	_member_of_domain_usage	04497962	0
01642671	_member_meronym	01643092	1
02896789	_also_see	13529616	0
13052931	_hypernym	13049953	1
01241594	_derivationally_related_form	01630284	0
08953151	_has_part	08953324	1
00513401	_hypernym	09343422	0
02797021	_derivationally_related_form	06593803	1
02359204	_member_of_domain_usage	08896645	0
00902932	_derivationally_related_form	06630627	1
04987620	_derivationally_related_form	01653975	0
09886807	_hypernym	09700492	1
03868044	_also_see	10641301	0
02548689	_hypernym	02552171	1
15196746	_member_of_domain_region	01082290	0
13516176	_derivationally_related_form	00210738	1
09770949	_hypernym	01293650	0
07803408	_hypernym	07803545	1
02156063	_member_meronym	02328270	0
02400139	_member_meronym	02423787	1
02967626	_verb_group	04178329	0
06845599	_member_of_domain_usage	03818843	1
02133161	_verb_group	06218459	0
08860123	_member_of_domain_region	08547300	1
01648001	_member_of_domain_region	00795161	0
02064154	_member_meronym	02064608	1
03654086	_hypernym	02415577	0
08174398	_member_meronym	09044862	1
12967504	_synset_domain_topic_of	01082290	0
02007417	_derivationally_related_form	00281132	1
02720725	_verb_group	02627292	0
02465414	_derivationally_related_form	01186428	1
07703889	_hypernym	01295918	0
08999482	_member_of_domain_region	09327077	1
02328270	_instance_hypernym	04015204	0
08860123	_member_of_domain_region	13752172	1
08600992	_member_meronym	08600992	0
02396427	_hypernym	02395003	1
02534734	_has_part	03970363	0
02395244	_member_meronym	02396427	1
02661317	_member_of_domain_usage	00513401	0
01552956	_member_meronym	01553142	1
08877382	_derivationally_related_form	01672607	0
04112752	_derivationally_related_form	00103317	1
08787695	_member_of_domain_region	06966825	0
08014860	_instance_hypernym	08392137	1
02595702	_member_of_domain_region	02457408	0
02011810	_derivationally_related_form	01778568	1
08122141	_has_part	02136285	0
06960298	_derivationally_related_form	02957823	1
13005329	_instance_hypernym	00431005	0
02658944	_member_meronym	02659176	1
14894140	_instance_hypernym	10595361	0
00853633	_derivationally_related_form	00431005	1
15165490	_has_part	09801102	0
13010219	_hypernym	11590783	1
10641223	_member_meronym	08095647	0
12060546	_hypernym	12041446	1
04015204	_derivationally_related_form	13246662	0
02329093	_member_meronym	02329401	1
12977565	_member_meronym	01320513	0
02535909	_member_meronym	02536864	1
01675190	_member_of_domain_region	08941208	0
02354950	_member_meronym	02355711	1
13393427	_also_see	04879658	0
02400139	_member_meronym	02407959	1
00088713	_also_see	01324799	0
10082146	_derivationally_related_form	00991838	1
13030438	_member_of_domain_region	03586631	0
08723006	_member_of_domain_region	05915584	1
00431005	_derivationally_related_form	09356639	0
09721244	_derivationally_related_form	08961402	1
09368224	_synset_domain_topic_of	00223983	0
06295235	_member_of_domain_usage	07140348	1
09151516	_synset_domain_topic_of	06263609	0
02660769	_member_meronym	02661765	1
04586932	_instance_hypernym	01277288	0
02366702	_member_meronym	02366825	1
06321702	_verb_group	10244913	0
01244593	_derivationally_related_form	00038365	1
10311661	_synset_domain_topic_of	02720725	0
09095023	_has_part	09095751	1
07791274	_has_part	01042764	0
04051825	_derivationally_related_form	01130607	1
02630052	_synset_domain_topic_of	02137549	0
02672859	_derivationally_related_form	13529616	1
06964247	_member_of_domain_usage	08337324	0
14883206	_derivationally_related_form	00443670	1
02595339	_has_part	02595569	0
09095751	_has_part	03009477	1
06883073	_member_of_domain_usage	02509197	0
00902932	_hypernym	00897241	1
07781207	_synset_domain_topic_of	07140348	0
12998349	_member_meronym	13016457	1
09393605	_member_of_domain_usage	00245289	0
03568653	_hypernym	03828465	1
07667326	_has_part	14040660	0
08723006	_has_part	09327881	1
07066459	_verb_group	02192383	0
09051235	_has_part	09075842	1
01446760	_has_part	02595569	0
08860123	_member_of_domain_region	08555333	1
07631212	_verb_group	09125203	0
00159899	_derivationally_related_form	00880227	1
02601767	_hypernym	13041725	0
12963796	_member_meronym	12965209	1
01137696	_also_see	00981369	0
01604251	_derivationally_related_form	00299680	1
02341108	_verb_group	02341108	0
13011856	_member_meronym	13012030	1
03120029	_synset_domain_topic_of	04987620	0
02716866	_hypernym	02716205	1
14411243	_also_see	14604959	0
08766988	_has_part	08775784	1
00299680	_has_part	09233284	0
00491689	_derivationally_related_form	09440186	1
09053019	_verb_group	02502357	0
09095023	_has_part	09306031	1
09093472	_derivationally_related_form	09242037	0
01471070	_member_meronym	01626134	1
02595569	_member_of_domain_usage	02934168	0
00897241	_derivationally_related_form	06630017	1
12078954	_similar_to	09084483	0
12979630	_hypernym	11592146	1
03868044	_derivationally_related_form	01443998	0
01542207	_verb_group	01541579	1
10641223	_synset_domain_topic_of	02530421	0
01503061	_has_part	01896031	1
04073669	_member_of_domain_usage	09884133	0
02640857	_hypernym	02640242	1
09714120	_verb_group	08640111	0
14487731	_derivationally_related_form	00493259	1
09129926	_member_meronym	13650921	0
02074915	_member_meronym	02083038	1
09770949	_derivationally_related_form	08349548	0
01645278	_hypernym	01626600	1
09123809	_synset_domain_topic_of	12972629	0
13065215	_member_meronym	13065514	1
00190682	_synset_domain_topic_of	05615147	0
00230172	_derivationally_related_form	02156546	1
09082540	_derivationally_related_form	14040846	0
08801678	_has_part	08804962	1
08579487	_derivationally_related_form	01137696	0
02534734	_has_part	07795751	1
02630281	_member_of_domain_region	03222959	0
02117900	_hypernym	02117135	1
02480153	_also_see	00482180	0
04412727	_hypernym	02720201	1
06366581	_instance_hypernym	02136285	0
00853633	_derivationally_related_form	10221312	1
01268112	_also_see	09064594	0
01015996	_derivationally_related_form	10366779	1
06964247	_synset_domain_topic_of	00245289	0
02648313	_hypernym	02647660	1
09159003	_has_part	09326467	0
14996020	_derivationally_related_form	01245637	1
01465713	_member_of_domain_region	15071684	0
04879658	_derivationally_related_form	00963283	1
05273684	_member_meronym	02652979	0
09075842	_has_part	09076675	1
13044541	_derivationally_related_form	02981024	0
02641825	_member_meronym	02646377	1
02437825	_derivationally_related_form	04601159	0
15155220	_has_part	15165490	1
05959954	_verb_group	02192383	0
14599641	_derivationally_related_form	00264875	1
12054902	_has_part	04015204	0
10338094	_derivationally_related_form	02390101	1
08553280	_instance_hypernym	09134386	0
02551824	_member_meronym	02552171	1
13529616	_member_of_domain_region	08797254	0
06845599	_member_of_domain_usage	04407007	1
00795161	_member_meronym	02625418	0
01299735	_has_part	01295918	1
02790012	_has_part	07140348	0
01647803	_member_meronym	01648001	1
08640111	_similar_to	01178415	0
08860123	_member_of_domain_region	04314522	1
04946877	_synset_domain_topic_of	02394822	0
08766988	_member_of_domain_region	09222742	1
01457082	_hypernym	03222959	0
02136271	_derivationally_related_form	04069276	1
02367993	_member_of_domain_usage	07927197	0
04010348	_hypernym	02720725	1
02540670	_instance_hypernym	01320513	0
08860123	_member_of_domain_region	08504851	1
09719430	_derivationally_related_form	06776783	0
02379753	_derivationally_related_form	00212205	1
02082056	_has_part	01137696	0
04733204	_derivationally_related_form	02262542	1
08766988	_derivationally_related_form	00954086	0
13060689	_member_meronym	13060912	1
09150448	_member_meronym	02650928	0
04473432	_derivationally_related_form	01953810	1
04955160	_member_meronym	08787466	0
07229747	_hypernym	07229530	1
02592607	_derivationally_related_form	09151516	0
08780881	_has_part	08783286	1
08804487	_also_see	02530421	0
14686913	_derivationally_related_form	00442267	1
02458517	_member_of_domain_usage	08936647	0
13054211	_member_meronym	13055009	1
14605132	_similar_to	12078954	0
12039743	_member_meronym	12045352	1
03937437	_hypernym	01213614	0
01915131	_derivationally_related_form	02898711	1
12983404	_has_part	08677801	0
08305942	_hypernym	08168978	1
02062991	_member_meronym	08785958	0
08860123	_member_of_domain_region	03702719	1
12977565	_member_of_domain_usage	12977565	0
07673397	_hypernym	07672135	1
02133161	_similar_to	06960566	0
03519578	_hypernym	03519981	1
01194238	_derivationally_related_form	12982723	0
01640383	_member_meronym	01640567	1
06373991	_derivationally_related_form	06263609	0
02641608	_member_meronym	02651846	1
02549989	_verb_group	09134386	0
01465994	_member_meronym	01467986	1
14877585	_also_see	04347519	0
03467517	_hypernym	04338517	1
09143017	_similar_to	07613671	0
13030852	_hypernym	13028611	1
02892948	_also_see	01287431	0
02412440	_derivationally_related_form	00058265	1
09076982	_synset_domain_topic_of	07803408	0
08174398	_member_meronym	08780881	1
02545153	_also_see	09075170	0
02854739	_hypernym	04508489	1
10472799	_member_of_domain_region	02580991	0
02389346	_verb_group	02389592	1
02595569	_member_of_domain_usage	01446760	0
14807929	_hypernym	05407119	1
02432511	_verb_group	02832168	0
12985236	_hypernym	11592146	1
04993882	_hypernym	04418644	0
14859622	_hypernym	14961512	1
03880323	_hypernym	01082290	0
02505809	_member_meronym	02505998	1
08764561	_synset_domain_topic_of	01646528	0
06871384	_derivationally_related_form	01050896	1
13387209	_synset_domain_topic_of	02429123	0
13016457	_member_meronym	13232515	1
08896645	_also_see	02359204	0
02659808	_hypernym	02658079	1
13359941	_instance_hypernym	01630284	0
09070793	_has_part	02956500	1
00294190	_hypernym	07784810	0
00432839	_derivationally_related_form	14489113	1
02751782	_synset_domain_topic_of	00089657	0
09368224	_derivationally_related_form	08641113	1
02121234	_similar_to	02331175	0
00680485	_derivationally_related_form	06211078	1
03093184	_similar_to	13319512	0
02340186	_hypernym	02339922	1
02174461	_synset_domain_topic_of	02981024	0
02175958	_derivationally_related_form	04989657	1
13456715	_member_meronym	02640626	0
00086835	_derivationally_related_form	00824054	1
02336011	_has_part	00981369	0
13000372	_member_meronym	13005568	1
02261642	_instance_hypernym	13064678	0
09117351	_has_part	09192973	1
09039260	_instance_hypernym	01631759	0
09761068	_derivationally_related_form	02470685	1
00085626	_member_of_domain_region	08553280	0
02399000	_hypernym	02394477	1
01631759	_member_meronym	00126721	0
13753585	_hypernym	13745420	1
08570758	_hypernym	07623933	0
10621514	_derivationally_related_form	00849294	1
08549480	_member_of_domain_region	07752264	0
09095023	_member_of_domain_region	01283935	1
00211396	_derivationally_related_form	15160418	0
08860123	_member_of_domain_region	09351547	1
02331479	_also_see	01889074	0
00772813	_derivationally_related_form	00963283	1
02447896	_similar_to	09058071	0
09284015	_derivationally_related_form	01567888	1
04760771	_member_meronym	09076982	0
02071294	_hypernym	02068974	1
09332976	_instance_hypernym	13623054	0
07622261	_derivationally_related_form	01265740	1
09154178	_member_meronym	05345581	0
08095647	_member_meronym	08096474	1
09268927	_has_part	09268927	0
00410406	_derivationally_related_form	09738708	1
02499700	_verb_group	07792470	0
02549533	_member_meronym	02549796	1
09123809	_hypernym	13039553	0
06845599	_member_of_domain_usage	14753414	1
12979478	_also_see	01337653	0
06695862	_derivationally_related_form	00880227	1
09111168	_member_meronym	08396537	0
00883635	_hypernym	00883226	1
00088713	_derivationally_related_form	12048772	0
02649218	_hypernym	02648625	1
00856847	_member_of_domain_region	09418484	0
01645634	_hypernym	01626134	1
01439121	_instance_hypernym	08082236	0
14836468	_hypernym	14732946	1
02471467	_derivationally_related_form	01873310	0
09709001	_hypernym	09708405	1
09867154	_similar_to	01245637	0
08554440	_hypernym	08553535	1
02137549	_member_of_domain_usage	02415577	0
13077033	_hypernym	12992868	1
02635310	_also_see	01630284	0
13043516	_hypernym	11590783	1
12977296	_member_of_domain_usage	01480880	0
13575433	_derivationally_related_form	00458754	1
02892948	_verb_group	00482180	0
01398941	_derivationally_related_form	04049405	1
08348815	_also_see	01144550	0
02528534	_member_meronym	02541431	1
07722485	_member_of_domain_usage	00125633	0
08801678	_member_of_domain_region	06964247	1
02411705	_member_meronym	02389346	0
08368308	_derivationally_related_form	02875499	1
01465713	_member_meronym	13752911	0
02425086	_hypernym	02419796	1
08813264	_member_of_domain_region	01324799	0
01640383	_member_meronym	01640846	1
09930876	_member_meronym	02390101	0
08563627	_has_part	09057311	1
02650928	_verb_group	08553280	0
08801099	_member_meronym	09696124	1
02574489	_member_of_domain_usage	12984802	0
01190840	_derivationally_related_form	07891726	1
03663433	_member_of_domain_region	02343772	0
09301249	_instance_hypernym	09241247	1
02609169	_member_of_domain_usage	13012030	0
01883212	_member_meronym	01883513	1
07653394	_has_part	12061104	0
09071690	_has_part	09378014	1
00495808	_member_of_domain_usage	02448318	0
08342039	_hypernym	08339454	1
09398217	_hypernym	02648456	0
04353016	_hypernym	04352070	1
12968658	_hypernym	12983404	0
13070003	_hypernym	11590783	1
02653497	_derivationally_related_form	02124623	0
02607630	_member_meronym	02609466	1
12977565	_also_see	01474283	0
13039870	_member_meronym	13040108	1
02635310	_instance_hypernym	02419515	0
02535349	_member_meronym	02535537	1
02411705	_member_of_domain_region	09244972	0
00105778	_derivationally_related_form	09930876	1
09085441	_hypernym	13066129	0
09682803	_derivationally_related_form	08095647	1
08640111	_member_of_domain_usage	02790012	0
01890860	_hypernym	01889520	1
02595339	_has_part	00374668	0
02936020	_derivationally_related_form	06321702	1
07703889	_verb_group	09370383	0
15169248	_hypernym	15228378	1
01241594	_hypernym	01274171	0
03933529	_derivationally_related_form	02331175	1
09478355	_synset_domain_topic_of	01915365	0
10272171	_hypernym	09886010	1
09907196	_member_of_domain_usage	02613960	0
14599168	_hypernym	14739360	1
02641608	_verb_group	10102369	0
13060451	_member_meronym	13062112	1
00759944	_member_meronym	09398217	0
00252710	_derivationally_related_form	15147850	1
10209731	_member_of_domain_region	07635155	0
02521241	_member_meronym	02525543	1
00842692	_synset_domain_topic_of	01876180	0
10146927	_derivationally_related_form	00899597	1
02415577	_also_see	08774546	0
05951969	_derivationally_related_form	10306279	1
02419515	_member_meronym	15160418	0
03315644	_derivationally_related_form	01271189	1
09143017	_instance_hypernym	02480153	0
02435853	_hypernym	02399000	1
06295235	_member_of_domain_usage	01644900	0
06845599	_member_of_domain_usage	03295357	1
02629410	_instance_hypernym	06263609	0
04764741	_derivationally_related_form	00485711	1
15146004	_synset_domain_topic_of	02174461	0
08723006	_member_of_domain_region	08321469	1
11875691	_member_of_domain_region	01645466	0
09052314	_instance_hypernym	09044862	1
09701603	_similar_to	03036469	0
12083339	_member_meronym	12083591	1
00759944	_derivationally_related_form	03470222	0
09060768	_has_part	09358096	1
09124039	_has_part	13802098	0
09044862	_has_part	09067277	1
02423465	_member_meronym	09867154	0
06214744	_derivationally_related_form	00408852	1
12984802	_derivationally_related_form	02439568	0
13037124	_hypernym	11592146	1
09084196	_instance_hypernym	08319198	0
00713250	_derivationally_related_form	01266895	1
01303582	_member_of_domain_usage	01227691	0
06845599	_member_of_domain_usage	14747168	1
10470779	_has_part	06295235	0
08801678	_member_of_domain_region	08541609	1
03198951	_verb_group	02650928	0
13298935	_hypernym	13298701	1
08250635	_hypernym	07649463	0
02409202	_hypernym	02407959	1
02342109	_member_of_domain_usage	00283911	0
08860123	_member_of_domain_region	06699225	1
08877807	_verb_group	10610465	0
00105778	_derivationally_related_form	00427580	1
07842753	_has_part	01293167	0
07858595	_derivationally_related_form	02195470	1
01465713	_member_meronym	02641608	0
13015229	_hypernym	11592146	1
08765623	_verb_group	04443918	0
08174398	_member_meronym	09039411	1
02415577	_member_of_domain_region	06481156	0
00419137	_derivationally_related_form	07443210	1
02562315	_instance_hypernym	04443257	0
06845599	_member_of_domain_usage	03155334	1
05525100	_has_part	03909835	0
05716744	_derivationally_related_form	02196690	1
02031622	_verb_group	05407119	0
02420789	_derivationally_related_form	00719705	1
02652979	_synset_domain_topic_of	03380134	0
01468238	_hypernym	01466257	1
10384214	_instance_hypernym	09229409	0
00575970	_derivationally_related_form	15055633	1
02797021	_instance_hypernym	13044778	0
09232165	_instance_hypernym	09475292	1
01295918	_hypernym	07722485	0
08124971	_has_part	08125722	1
04879658	_derivationally_related_form	02549989	0
12998349	_member_meronym	13074084	1
02328270	_hypernym	02328270	0
08641113	_derivationally_related_form	10352299	1
13042814	_also_see	01164874	0
06201908	_derivationally_related_form	00680346	1
09098721	_derivationally_related_form	01642671	0
00880227	_derivationally_related_form	06695579	1
10198437	_derivationally_related_form	09039260	0
08984788	_has_part	09453566	1
04347519	_synset_domain_topic_of	00132385	0
06845599	_member_of_domain_usage	04006953	1
00918471	_member_of_domain_usage	09234104	0
02066707	_hypernym	02062744	1
03661861	_instance_hypernym	09701603	0
08929922	_member_of_domain_region	13753274	1
09144117	_instance_hypernym	08787466	0
01126846	_hypernym	01127411	1
09877443	_also_see	07450549	0
06413889	_derivationally_related_form	07009946	1
13048666	_derivationally_related_form	12977296	0
12968408	_member_meronym	12970379	1
13881512	_also_see	00419375	0
09127461	_instance_hypernym	09399592	1
09397391	_instance_hypernym	12975608	0
00883226	_derivationally_related_form	07230089	1
09076982	_derivationally_related_form	08877807	0
00135285	_derivationally_related_form	06372095	1
02580991	_member_of_domain_region	09155986	0
10490421	_hypernym	09841188	1
09192973	_verb_group	09693372	0
04051068	_hypernym	02673637	1
07703889	_derivationally_related_form	09100982	0
02340930	_hypernym	02339376	1
04443918	_member_of_domain_usage	08787695	0
08929922	_member_of_domain_region	06964901	1
02687992	_member_meronym	02635310	0
02593863	_member_meronym	02596888	1
14599168	_verb_group	12073007	0
06845599	_member_of_domain_usage	04476633	1
02574271	_has_part	02228901	0
09119277	_has_part	04604009	1
08809749	_similar_to	02062744	0
08674970	_derivationally_related_form	02468965	1
09498497	_member_of_domain_usage	01291674	0
00105554	_derivationally_related_form	00431005	1
08785958	_hypernym	07649463	0
09038990	_has_part	09719430	1
02228901	_derivationally_related_form	03937437	0
09243405	_instance_hypernym	09215664	1
09200874	_derivationally_related_form	04495051	0
15159583	_derivationally_related_form	00734927	1
02398854	_member_of_domain_usage	12979129	0
02633677	_hypernym	02632989	1
03718581	_has_part	02415435	0
00485711	_derivationally_related_form	04764741	1
13032115	_has_part	02341108	0
01896031	_has_part	01897991	1
09368224	_derivationally_related_form	08729283	0
01696135	_derivationally_related_form	04694809	1
10069645	_also_see	02989178	0
03670622	_hypernym	02716866	1
03074922	_instance_hypernym	07667326	0
09087599	_has_part	09368479	1
07803408	_member_of_domain_usage	13043264	0
08149781	_hypernym	08081668	1
01278232	_member_meronym	00827379	0
09260466	_hypernym	09416076	1
09243209	_similar_to	08303275	0
13024763	_member_meronym	13024967	1
00627437	_member_of_domain_usage	06310945	0
02534352	_member_meronym	02535349	1
13005329	_member_of_domain_usage	09292751	0
01891438	_member_meronym	01891633	1
01291674	_synset_domain_topic_of	02396427	0
03612814	_hypernym	03990474	1
02363818	_has_part	09648743	0
09044862	_has_part	09111366	1
01271189	_similar_to	01696648	0
03662016	_hypernym	03681148	1
01646528	_similar_to	04018399	0
02396796	_hypernym	02395003	1
07791274	_similar_to	08221348	0
09082540	_has_part	09084483	1
13752911	_verb_group	09717047	0
10318892	_derivationally_related_form	01743531	1
06263609	_synset_domain_topic_of	09168020	0
12978969	_hypernym	11590783	1
15170786	_member_of_domain_usage	00800121	0
06845599	_member_of_domain_usage	04443588	1
08764561	_hypernym	01439121	0
02989475	_hypernym	02996840	1
03868044	_member_of_domain_region	03880323	0
06344461	_hypernym	06343971	1
02601767	_has_part	10621514	0
01874928	_hypernym	01874434	1
05731568	_verb_group	02586543	0
15228378	_hypernym	15129927	1
01654957	_similar_to	12975982	0
10352299	_derivationally_related_form	08641113	1
09930876	_also_see	00495808	0
02068735	_member_meronym	02069569	1
00223983	_synset_domain_topic_of	08729283	0
02324045	_has_part	02158739	1
08811982	_similar_to	13066129	0
02356108	_member_meronym	02355477	1
01126335	_instance_hypernym	07883384	0
03362393	_hypernym	02715941	1
08790953	_verb_group	01086945	0
05681117	_has_part	05768553	1
12072210	_hypernym	09935233	0
07427337	_derivationally_related_form	00223500	1
09053019	_derivationally_related_form	09058071	0
10582154	_derivationally_related_form	02540670	1
13802098	_verb_group	10717921	0
09078231	_member_of_domain_region	02581957	1
02952109	_derivationally_related_form	03222959	0
02507337	_member_meronym	02509694	1
01650167	_verb_group	01274909	0
10268299	_derivationally_related_form	02614387	1
02459915	_hypernym	04495051	0
07443210	_derivationally_related_form	00441212	1
06966825	_derivationally_related_form	13032115	0
08780881	_member_of_domain_region	09542697	1
07623933	_verb_group	03966976	0
02015168	_derivationally_related_form	00057306	1
01874784	_instance_hypernym	09064594	0
09039411	_member_of_domain_region	06340047	1
13039553	_member_of_domain_region	03953416	0
02430191	_derivationally_related_form	01081456	1
02007417	_similar_to	02342109	0
06845599	_member_of_domain_usage	03588668	1
06767777	_has_part	09111168	0
06295235	_member_of_domain_usage	09212572	1
02632239	_member_meronym	09472597	0
02335349	_member_meronym	02338029	1
01337653	_also_see	08877382	0
13007770	_hypernym	11592146	1
02502514	_similar_to	14746048	0
07679356	_derivationally_related_form	01337653	1
02438452	_instance_hypernym	12967504	0
02331309	_hypernym	02331046	1
01086945	_instance_hypernym	02601921	0
00680346	_hypernym	00680145	1
00190999	_synset_domain_topic_of	01303582	0
08986066	_instance_hypernym	08691669	1
09064594	_verb_group	00459114	0
11517494	_derivationally_related_form	00073584	1
14607521	_member_of_domain_usage	00223854	0
09067277	_has_part	09373716	1
13064678	_synset_domain_topic_of	01630284	0
00842692	_derivationally_related_form	01186428	1
08782976	_has_part	03757925	0
00492677	_derivationally_related_form	08615374	1
06295235	_member_meronym	13265904	0
13005329	_hypernym	12998815	1
09089782	_synset_domain_topic_of	09192973	0
07653394	_hypernym	07649854	1
09123809	_hypernym	01443126	0
10382825	_derivationally_related_form	03854065	1
03718581	_member_of_domain_region	09326467	0
02652668	_hypernym	02552171	1
04441282	_member_of_domain_region	01915365	0
00088725	_derivationally_related_form	01215137	1
09452395	_synset_domain_topic_of	02934168	0
02453890	_member_meronym	02456776	1
01164874	_has_part	06366581	0
09400667	_instance_hypernym	09440186	1
02390101	_instance_hypernym	09348460	0
01158572	_derivationally_related_form	13451804	1
04683136	_derivationally_related_form	07140348	0
07779747	_hypernym	07775905	1
01126846	_synset_domain_topic_of	02471467	0
01653026	_hypernym	01639765	1
02073041	_derivationally_related_form	09702134	0
02358091	_hypernym	02355227	1
01042764	_verb_group	08221348	0
04947628	_hypernym	04947186	1
08250635	_verb_group	02366825	0
09075842	_has_part	09378014	1
03472796	_also_see	09086070	0
08860123	_member_of_domain_region	07450343	1
10659393	_instance_hypernym	04242704	0
00040188	_derivationally_related_form	00256961	1
08396537	_member_meronym	00052146	0
02411705	_has_part	02439568	1
02549989	_verb_group	02533209	0
09044862	_has_part	09059274	1
09129926	_has_part	01453330	0
00991838	_derivationally_related_form	14864360	1
15147850	_member_of_domain_usage	02599207	0
02510455	_hypernym	02507649	1
09131428	_member_meronym	00019128	0
02546075	_derivationally_related_form	10183757	1
00294190	_member_of_domain_usage	06344461	0
02553196	_member_meronym	02621721	1
14411243	_member_of_domain_region	08785958	0
00191517	_derivationally_related_form	13496771	1
03296759	_member_of_domain_usage	08040762	0
02400139	_member_meronym	02409702	1
13060451	_instance_hypernym	00125633	0
14841267	_derivationally_related_form	02112891	1
09111168	_verb_group	13030438	0
01167981	_derivationally_related_form	08253815	1
02623445	_derivationally_related_form	06245084	0
00492677	_derivationally_related_form	04764741	1
05949937	_hypernym	03186005	0
02341475	_hypernym	02339376	1
02124623	_similar_to	12048772	0
10162354	_derivationally_related_form	03497657	1
13802098	_verb_group	04606014	0
02130308	_hypernym	02127808	1
01293167	_synset_domain_topic_of	01304121	0
01141938	_derivationally_related_form	02062744	1
07800487	_member_of_domain_usage	04449796	0
07590611	_hypernym	07588947	1
08941208	_instance_hypernym	04495051	0
02380009	_derivationally_related_form	10525617	1
09084196	_member_meronym	01227691	0
01888520	_member_meronym	01893535	1
13505987	_instance_hypernym	10384214	0
01560369	_derivationally_related_form	00360242	1
12977795	_derivationally_related_form	02434541	0
01648494	_member_meronym	01648620	1
01440949	_synset_domain_topic_of	02623170	0
09194357	_has_part	09357847	1
02346627	_derivationally_related_form	10641223	0
12967776	_hypernym	11590783	1
09408540	_verb_group	01194238	0
08932568	_has_part	08933621	1
09452395	_has_part	09453288	0
01445027	_derivationally_related_form	14757547	1
02369012	_derivationally_related_form	00223854	0
02457756	_member_meronym	02457945	1
07623933	_hypernym	10489944	0
13660178	_derivationally_related_form	00491689	1
02480153	_verb_group	01398212	0
01130607	_derivationally_related_form	04051825	1
09086070	_instance_hypernym	00482180	0
06845599	_member_of_domain_usage	15071684	1
02606590	_member_of_domain_region	15169136	0
02602212	_derivationally_related_form	07515974	1
08214272	_member_meronym	03976268	0
03497657	_has_part	02902079	1
10384214	_also_see	02431785	0
09103943	_has_part	09459557	1
00492706	_member_meronym	08813807	0
00161739	_derivationally_related_form	01696648	1
13025197	_member_of_domain_usage	10102369	0
08133189	_hypernym	08337324	1
09168020	_has_part	05978623	0
00799537	_derivationally_related_form	02414473	1
01896031	_instance_hypernym	10470779	0
13205482	_member_meronym	13210006	1
08895771	_derivationally_related_form	02429123	0
08860123	_member_of_domain_region	04441528	1
01291674	_hypernym	03470222	0
09109444	_has_part	09109882	1
07913081	_has_part	02431785	0
01305361	_hypernym	02085742	1
09110229	_derivationally_related_form	09545324	0
02336011	_hypernym	02329401	1
03198951	_member_meronym	01319874	0
03970363	_hypernym	02896442	1
02558350	_synset_domain_topic_of	03976268	0
03061081	_derivationally_related_form	05996646	1
09453288	_derivationally_related_form	10489944	0
13486270	_derivationally_related_form	00442267	1
01446760	_derivationally_related_form	01675190	0
01382818	_derivationally_related_form	01639765	1
06880664	_hypernym	02629410	0
02673480	_hypernym	02832168	1
02619738	_similar_to	09076982	0
08860123	_member_of_domain_region	07635155	1
02586865	_synset_domain_topic_of	13752911	0
13006377	_hypernym	11592146	1
02509694	_member_of_domain_region	03586631	0
01075117	_hypernym	00954086	1
10744164	_member_of_domain_usage	13497135	0
02784732	_derivationally_related_form	01273263	1
00088713	_synset_domain_topic_of	04349701	0
06295235	_member_of_domain_usage	03885028	1
02448318	_verb_group	13265904	0
00089154	_derivationally_related_form	14283632	1
00038687	_member_of_domain_usage	09051726	0
02907985	_instance_hypernym	04511002	1
04299699	_hypernym	13041725	0
15058163	_hypernym	15057744	1
02423465	_hypernym	09102517	0
08910668	_has_part	09237404	1
14411243	_also_see	01454856	0
14276936	_hypernym	14070360	1
04053995	_member_of_domain_region	15169136	0
08214470	_hypernym	08190754	1
03093574	_has_part	02346627	0
13038944	_member_meronym	13046285	1
01042764	_synset_domain_topic_of	09151516	0
00366858	_derivationally_related_form	15055633	1
02081282	_member_of_domain_usage	04134339	0
08860123	_member_of_domain_region	13359941	1
02477890	_synset_domain_topic_of	09268927	0
02652979	_member_meronym	02653359	1
15187077	_derivationally_related_form	01293650	0
13029946	_member_meronym	13030157	1
01173826	_hypernym	03069752	0
09114696	_has_part	09418484	1
13026146	_verb_group	01320513	0
03914919	_derivationally_related_form	01543731	1
01672607	_instance_hypernym	09154178	0
09109444	_has_part	09441725	1
01645466	_synset_domain_topic_of	01645466	0
05410646	_hypernym	05407119	1
09076982	_derivationally_related_form	01126846	0
13063269	_hypernym	12992868	1
09770949	_instance_hypernym	02444103	0
03928814	_hypernym	03614007	1
07635155	_derivationally_related_form	07803992	0
02483915	_member_meronym	02484473	1
01547001	_verb_group	00627437	0
02068206	_hypernym	02066707	1
02509197	_verb_group	01164874	0
02654425	_hypernym	02652668	1
02434541	_has_part	02706373	0
06845599	_member_of_domain_usage	03554131	1
02563497	_member_of_domain_region	04441528	0
00483656	_derivationally_related_form	06863751	1
02562315	_similar_to	12979478	0
13063046	_hypernym	11594676	1
02411705	_has_part	00294190	0
00604617	_derivationally_related_form	04718563	1
00052146	_similar_to	06195698	0
06295235	_member_of_domain_usage	04323819	1
02509197	_member_of_domain_region	01453188	0
01144550	_derivationally_related_form	02443484	1
02892948	_instance_hypernym	13298011	0
09049599	_has_part	09103943	1
09157163	_member_meronym	04473432	0
13003522	_hypernym	12998815	1
01648001	_synset_domain_topic_of	13032115	0
14974264	_derivationally_related_form	01268457	1
13796779	_instance_hypernym	03953416	0
08860123	_member_of_domain_region	07889814	1
08337324	_hypernym	01628450	0
02355477	_hypernym	02355227	1
10224098	_similar_to	02411427	0
09060768	_has_part	09326467	1
01474283	_similar_to	03909835	0
06510977	_derivationally_related_form	02896789	1
01675190	_member_of_domain_usage	14911057	0
04248851	_derivationally_related_form	01480770	1
02458135	_also_see	02606194	0
01758308	_derivationally_related_form	01173813	1
02432511	_synset_domain_topic_of	09158268	0
14705718	_derivationally_related_form	01354006	1
13505987	_verb_group	02082056	0
09044862	_member_of_domain_region	08303692	1
10690421	_derivationally_related_form	14605132	0
12992464	_member_meronym	11592146	1
01889074	_member_of_domain_usage	02449921	0
03747746	_hypernym	03771443	1
02629410	_member_of_domain_usage	09201301	0
13031956	_hypernym	11592146	1
10113362	_also_see	02356381	0
01320513	_derivationally_related_form	10587227	1
01629276	_also_see	13039553	0
02485451	_derivationally_related_form	01164874	1
02398463	_synset_domain_topic_of	05385363	0
01193099	_derivationally_related_form	00840630	1
06845599	_synset_domain_topic_of	09714120	0
13210006	_hypernym	13167078	1
03953416	_has_part	02410509	0
03550533	_hypernym	02718469	1
13024012	_member_meronym	01628450	0
02590237	_member_meronym	02592244	1
01654957	_member_meronym	07792470	0
02373093	_member_meronym	02373601	1
10621514	_instance_hypernym	14487184	0
12982103	_hypernym	11590783	1
08677801	_derivationally_related_form	08600992	0
04353410	_hypernym	03828465	1
09702134	_member_meronym	02503313	0
02072355	_member_meronym	02072493	1
04955160	_member_meronym	07450549	0
09711132	_hypernym	09710164	1
02424695	_also_see	01443537	0
01290435	_instance_hypernym	01075117	1
00252710	_also_see	02608004	0
09250165	_instance_hypernym	09453008	1
04018399	_member_meronym	02530421	0
02156063	_derivationally_related_form	13773361	1
01881857	_member_of_domain_region	13041725	0
09114696	_has_part	09228619	1
01743531	_member_of_domain_usage	03650173	0
01284444	_instance_hypernym	00223983	1
01444164	_member_of_domain_region	02589955	0
09044862	_has_part	09089139	1
02007417	_similar_to	15055633	0
02380980	_hypernym	01766952	1
01475648	_synset_domain_topic_of	07886849	0
02553196	_member_meronym	02618244	1
08785958	_member_meronym	01444164	0
12996225	_member_meronym	13065902	1
13005329	_also_see	02174461	0
06367373	_derivationally_related_form	01635176	1
04115456	_instance_hypernym	01144550	0
13068434	_hypernym	13066129	1
02790012	_verb_group	02458517	0
02325211	_member_meronym	02325366	1
08774546	_member_of_domain_usage	06481156	0
02554235	_derivationally_related_form	10663315	1
02133161	_also_see	08944818	0
02574651	_member_meronym	02574910	1
09124039	_member_of_domain_usage	02652979	0
06295235	_member_of_domain_usage	09269972	1
09397391	_member_of_domain_usage	09064594	0
01546660	_member_meronym	01547459	1
08941208	_member_of_domain_region	07140348	0
00288486	_derivationally_related_form	01928730	1
09095023	_similar_to	15187077	0
09048880	_has_part	09092497	1
01675190	_instance_hypernym	00457228	0
06295235	_member_of_domain_usage	01042764	1
02631238	_instance_hypernym	09023321	0
00719705	_derivationally_related_form	02461063	1
09701603	_similar_to	04606014	0
02590910	_derivationally_related_form	10788852	1
14040846	_member_of_domain_region	02338592	0
00964105	_instance_hypernym	00962129	1
02576223	_instance_hypernym	02494538	0
09141526	_has_part	09388121	1
01082290	_verb_group	09477890	0
10792335	_derivationally_related_form	01778017	1
13043264	_member_of_domain_usage	13456715	0
02597367	_hypernym	02594250	1
07800487	_also_see	12972414	0
02346315	_member_meronym	02346823	1
15057744	_also_see	07027458	0
00201058	_derivationally_related_form	01972131	1
02503313	_member_of_domain_region	01274909	0
09152944	_has_part	09153710	1
00954086	_member_of_domain_usage	00954086	0
02564403	_hypernym	02562315	1
01137696	_derivationally_related_form	12062227	0
13030157	_member_meronym	13030438	1
10215623	_verb_group	09678009	0
15165289	_has_part	15169136	1
04242704	_hypernym	09772746	0
02133704	_hypernym	02131653	1
02509197	_has_part	15183802	0
09044862	_has_part	09075842	1
10470779	_also_see	05411571	0
00962722	_derivationally_related_form	02583780	1
02724966	_similar_to	12975982	0
02072159	_derivationally_related_form	00914343	1
09326467	_has_part	02062744	0
08932568	_has_part	08933940	1
09194357	_has_part	15159819	0
10075529	_derivationally_related_form	06371413	1
02133902	_member_of_domain_usage	02627292	0
01883513	_hypernym	01874434	1
01287431	_member_meronym	02649082	0
05010801	_derivationally_related_form	02675458	1
13265904	_synset_domain_topic_of	02640626	0
01649948	_member_meronym	01650167	1
14299336	_member_of_domain_usage	12967281	0
09138935	_has_part	09320985	1
15170786	_member_meronym	01126335	0
09237076	_has_part	09405169	1
01475421	_also_see	00025654	0
02688623	_derivationally_related_form	07802417	1
15169136	_synset_domain_topic_of	10476671	0
04236001	_derivationally_related_form	02701445	1
07927197	_verb_group	06195698	0
03200357	_hypernym	03895866	1
00019128	_synset_domain_topic_of	01465713	0
03718056	_hypernym	03214670	1
01928390	_member_of_domain_region	04473432	0
01644104	_hypernym	01626134	1
07027458	_derivationally_related_form	09135447	0
09044862	_has_part	09078231	1
02136285	_derivationally_related_form	09089782	0
00751389	_derivationally_related_form	00848466	1
01548301	_verb_group	14757547	0
09219078	_instance_hypernym	09403734	1
09273447	_member_of_domain_region	09678009	0
02546744	_member_meronym	02546873	1
09048127	_hypernym	06963951	0
05043973	_derivationally_related_form	02112029	1
02641608	_also_see	00019128	0
01649948	_member_meronym	01652163	1
03021531	_synset_domain_topic_of	03198951	0
09078231	_derivationally_related_form	02738760	1
00702226	_member_of_domain_region	06258228	0
02989893	_hypernym	02996840	1
01277288	_instance_hypernym	09114696	0
08860123	_member_of_domain_usage	10548227	1
08404895	_has_part	01474283	0
