# Supplementary material
Source: ML conference proceedings conference paper supplement (https://proceedings.neurips.cc/paper_files/paper/2021/hash/0fd600c953cde8121262e322ef09f70e-Abstract.html)
Supplement: Supplementary file 1 [file 0fd600c953cde8121262e322ef09f70e-Supplemental.zip › Supplementary_Material_Paper_8745/data/GraIL-BM_WN18RR_v3/train/train.txt]

08182716	_derivationally_related_form	02064131
06193727	_hypernym	06193203
01518047	_derivationally_related_form	10734568
12290116	_member_meronym	12292655
07180183	_hypernym	07175241
05259240	_derivationally_related_form	00039488
02215001	_derivationally_related_form	10785695
07926127	_hypernym	07901587
03513627	_hypernym	03264542
00084230	_derivationally_related_form	03740161
02709367	_has_part	04184095
03682487	_derivationally_related_form	01348174
03033362	_has_part	04211001
00726300	_hypernym	00670261
11754188	_member_meronym	11758628
01072949	_derivationally_related_form	00557588
01236164	_hypernym	01206218
07355887	_derivationally_related_form	00152887
12821736	_hypernym	11744859
14006945	_derivationally_related_form	00040325
00742320	_derivationally_related_form	06252138
00672433	_derivationally_related_form	10066732
02410393	_also_see	00986027
12501745	_member_meronym	12556030
02958343	_has_part	04105438
07246582	_derivationally_related_form	00875394
10474645	_hypernym	10045713
13810615	_hypernym	13809207
09815790	_hypernym	09632518
00392960	_derivationally_related_form	05071556
03892891	_hypernym	00002684
01019524	_derivationally_related_form	01747374
05896733	_hypernym	05893653
00931852	_derivationally_related_form	06601327
13907415	_derivationally_related_form	02035919
02087745	_hypernym	01850315
01586791	_member_meronym	01586941
01076488	_derivationally_related_form	00908099
14541044	_hypernym	00007347
12808227	_member_meronym	12874231
02285359	_member_meronym	02286271
12602850	_hypernym	11567411
01411085	_derivationally_related_form	10684146
01782519	_derivationally_related_form	04828255
02461723	_derivationally_related_form	06756407
14363483	_derivationally_related_form	01551679
07226545	_derivationally_related_form	00884317
04588365	_hypernym	03848729
03087366	_derivationally_related_form	00244625
01239619	_also_see	01240308
01494310	_also_see	02494356
07475364	_hypernym	07291312
02196344	_hypernym	02188699
08572467	_hypernym	08573472
05563266	_has_part	05577190
11705921	_hypernym	11571907
01769930	_hypernym	01762525
06712325	_derivationally_related_form	00828374
02387034	_derivationally_related_form	10722575
00410247	_derivationally_related_form	01834304
10168012	_hypernym	10524413
04004210	_hypernym	03084420
01353226	_derivationally_related_form	02081946
07354731	_derivationally_related_form	01100145
00948206	_derivationally_related_form	00171852
00376400	_derivationally_related_form	01298931
02159271	_member_meronym	02188065
01543936	_hypernym	01542786
12618942	_member_meronym	12787565
02521410	_hypernym	00776059
02648253	_derivationally_related_form	01018366
02058756	_derivationally_related_form	09993252
01410363	_derivationally_related_form	04750764
07369604	_derivationally_related_form	00299580
02609764	_derivationally_related_form	08566707
02497062	_derivationally_related_form	13996061
00923793	_derivationally_related_form	03975232
05138208	_hypernym	04723816
11911591	_member_meronym	11992340
00479076	_hypernym	00463246
00809465	_derivationally_related_form	10388924
02520509	_derivationally_related_form	02940509
12593826	_hypernym	11556857
08287844	_hypernym	07966140
01711749	_hypernym	01711445
14416089	_derivationally_related_form	02144835
08223263	_hypernym	08180190
01524885	_member_meronym	01600480
05675905	_hypernym	05804793
02311060	_hypernym	00015388
00786458	_derivationally_related_form	10068234
05788149	_hypernym	05770664
01586850	_derivationally_related_form	02875013
01085098	_derivationally_related_form	02295208
00717208	_derivationally_related_form	06753800
10379758	_derivationally_related_form	02424652
10524223	_derivationally_related_form	00694068
01786879	_hypernym	01342529
00579712	_derivationally_related_form	10669991
01803003	_hypernym	01789514
01522276	_derivationally_related_form	10781984
02401661	_member_meronym	02402010
12593122	_has_part	12593341
09777353	_derivationally_related_form	02607909
06716234	_derivationally_related_form	00849080
05630409	_hypernym	05629682
00433115	_also_see	00430191
01203715	_derivationally_related_form	10470460
01161635	_derivationally_related_form	14562324
02413480	_derivationally_related_form	09767197
12557995	_hypernym	12556307
00869931	_derivationally_related_form	03337140
03659809	_derivationally_related_form	01593254
00651991	_derivationally_related_form	04748836
10060352	_derivationally_related_form	08056231
07490713	_derivationally_related_form	01800349
00607780	_derivationally_related_form	05761918
00654625	_derivationally_related_form	05732756
00065070	_derivationally_related_form	10595647
01085237	_synset_domain_topic_of	00523513
00365647	_verb_group	00365188
00969506	_hypernym	00973056
01731031	_hypernym	01729431
01276970	_derivationally_related_form	03832405
02519183	_hypernym	02518161
01771966	_member_meronym	01772222
02511551	_hypernym	00697589
15256915	_has_part	15257829
05310351	_hypernym	05470189
01955984	_verb_group	02102398
11803475	_hypernym	08103777
05827253	_derivationally_related_form	01646866
08236621	_hypernym	08236438
02274299	_derivationally_related_form	00789534
08473482	_derivationally_related_form	10720964
09964805	_hypernym	10053808
00335988	_derivationally_related_form	01884383
10253995	_derivationally_related_form	00594374
02427726	_hypernym	02386388
07414922	_derivationally_related_form	02248465
00519056	_hypernym	00105333
07344663	_derivationally_related_form	07352190
01804414	_derivationally_related_form	09931640
03150795	_synset_domain_topic_of	06128570
02407338	_derivationally_related_form	00788973
02206270	_hypernym	02159955
10323182	_derivationally_related_form	08402442
10461424	_derivationally_related_form	00747418
00262792	_also_see	00065791
14574846	_derivationally_related_form	00906735
01690703	_hypernym	01656813
14997012	_hypernym	15046900
00798245	_derivationally_related_form	02589576
00954311	_synset_domain_topic_of	08199025
01194483	_derivationally_related_form	04660536
02503803	_derivationally_related_form	00206302
00980779	_derivationally_related_form	01506157
02909006	_derivationally_related_form	00815801
00049003	_derivationally_related_form	01720660
00591858	_hypernym	00586262
00249679	_hypernym	00126264
10670668	_derivationally_related_form	00806314
00480751	_hypernym	02339413
00431447	_derivationally_related_form	04701460
00644583	_derivationally_related_form	05772667
06766190	_derivationally_related_form	01020005
00976653	_derivationally_related_form	09773962
05734559	_derivationally_related_form	00740053
05148699	_hypernym	04723816
02098325	_also_see	00639356
06277280	_has_part	06277803
00494907	_also_see	00150202
01549905	_derivationally_related_form	04691178
00315986	_has_part	00319176
06722186	_hypernym	06598915
13983304	_derivationally_related_form	00291873
01166351	_derivationally_related_form	00838367
14361664	_derivationally_related_form	01891817
07269916	_synset_domain_topic_of	06128570
14436438	_hypernym	14436029
02572119	_derivationally_related_form	09955015
00428270	_hypernym	06157326
02381397	_hypernym	02406585
01503952	_derivationally_related_form	07963087
01098869	_derivationally_related_form	01156438
04933544	_derivationally_related_form	02620587
00164152	_derivationally_related_form	02396205
01511706	_derivationally_related_form	00045250
07205573	_hypernym	07204401
10717589	_derivationally_related_form	01206849
01647867	_hypernym	01647672
00420477	_derivationally_related_form	02585489
01451842	_derivationally_related_form	00302394
02469274	_derivationally_related_form	09385137
00072012	_derivationally_related_form	13533886
06404582	_derivationally_related_form	00996485
09272468	_hypernym	09190918
05480794	_has_part	05491612
07180570	_derivationally_related_form	01705257
01456463	_hypernym	01552519
00535452	_derivationally_related_form	13864965
05658226	_derivationally_related_form	02194495
02384686	_verb_group	01469770
07073447	_member_of_domain_usage	02527085
02679012	_derivationally_related_form	00065575
01727490	_hypernym	01724459
07951464	_derivationally_related_form	01656788
01163620	_derivationally_related_form	10319796
02756098	_derivationally_related_form	00044149
04576211	_has_part	02889425
13988663	_derivationally_related_form	01149494
00883297	_derivationally_related_form	00603298
13111174	_hypernym	13109733
02169891	_also_see	02189714
07197021	_derivationally_related_form	00669970
07045353	_hypernym	07044917
14407536	_derivationally_related_form	00776988
01507143	_derivationally_related_form	00454624
04068441	_derivationally_related_form	00474762
02277448	_synset_domain_topic_of	00766234
00485609	_derivationally_related_form	07417043
10742546	_derivationally_related_form	02405390
04313220	_synset_domain_topic_of	03791235
01011031	_derivationally_related_form	06732350
01517662	_hypernym	01223182
12618942	_member_meronym	12806270
01732172	_synset_domain_topic_of	06157326
09939313	_derivationally_related_form	01091427
09911570	_derivationally_related_form	01037303
02593001	_derivationally_related_form	00753685
00731222	_derivationally_related_form	10323182
00835903	_derivationally_related_form	07434102
01912893	_derivationally_related_form	00283568
01057759	_hypernym	01057200
00162632	_derivationally_related_form	00634472
10731244	_hypernym	09631129
13530408	_derivationally_related_form	00239321
02390287	_hypernym	01844431
01775592	_hypernym	01759182
01363482	_hypernym	01332730
12216628	_hypernym	13112664
00047945	_derivationally_related_form	02728440
01022906	_derivationally_related_form	05913275
02506361	_derivationally_related_form	00765193
00155143	_derivationally_related_form	00364260
09415938	_derivationally_related_form	02066939
04980008	_derivationally_related_form	02124748
02226013	_hypernym	02339413
00439958	_derivationally_related_form	05061345
01006421	_hypernym	00987071
10490699	_derivationally_related_form	00954608
00367976	_derivationally_related_form	02060141
09972157	_derivationally_related_form	01753596
09140148	_has_part	09141119
01134522	_derivationally_related_form	09811852
02081178	_hypernym	02049696
08592656	_derivationally_related_form	00730301
00488770	_derivationally_related_form	04526241
12581381	_member_meronym	12593826
00854904	_derivationally_related_form	10100761
00115036	_derivationally_related_form	01454810
04895246	_derivationally_related_form	02464693
00273319	_derivationally_related_form	02579447
12506614	_member_meronym	12506784
00781652	_hypernym	02296726
07369604	_derivationally_related_form	00300537
02189714	_hypernym	02169891
02005948	_derivationally_related_form	00048374
04821802	_derivationally_related_form	00896555
11665781	_member_meronym	12090041
02413140	_derivationally_related_form	10554455
00314782	_hypernym	00150287
02116118	_derivationally_related_form	05827684
04105438	_hypernym	04014297
07800091	_hypernym	00021265
01146576	_derivationally_related_form	02495038
01918803	_derivationally_related_form	10022645
01186810	_synset_domain_topic_of	08441203
02253154	_derivationally_related_form	01120448
02120451	_derivationally_related_form	02465693
00992041	_derivationally_related_form	06876309
01323958	_verb_group	01325536
13437181	_derivationally_related_form	01478603
11465017	_derivationally_related_form	01902783
01705494	_derivationally_related_form	07037465
00158185	_derivationally_related_form	02536329
05070849	_hypernym	05064037
05850624	_hypernym	05849789
00701877	_hypernym	00701040
11953339	_has_part	07731767
02384858	_derivationally_related_form	01086103
01548718	_derivationally_related_form	06389230
00752335	_derivationally_related_form	10317007
00409211	_derivationally_related_form	01510827
02610628	_derivationally_related_form	15267536
00077419	_derivationally_related_form	02210855
02483267	_verb_group	02484208
00101191	_derivationally_related_form	01724459
10695555	_derivationally_related_form	01803380
02550868	_hypernym	02551144
01671039	_derivationally_related_form	03625355
04781755	_derivationally_related_form	01460421
10561320	_hypernym	09631463
01620854	_derivationally_related_form	07291794
02727039	_derivationally_related_form	08628921
02062670	_also_see	00889831
00629738	_derivationally_related_form	05786372
10269458	_derivationally_related_form	01177118
12760722	_member_meronym	12760875
07505047	_derivationally_related_form	01822936
01303547	_derivationally_related_form	00696882
10340312	_derivationally_related_form	05718935
08521816	_derivationally_related_form	00329831
00994076	_derivationally_related_form	00614489
00941990	_hypernym	00740577
00197772	_derivationally_related_form	00162688
00780148	_derivationally_related_form	02573127
02130524	_derivationally_related_form	10633450
12093088	_hypernym	11567411
02079170	_member_meronym	02080022
01188725	_hypernym	02604760
01004550	_hypernym	01000214
14371913	_hypernym	14299637
02123672	_hypernym	02123903
02001461	_derivationally_related_form	00320486
00902424	_hypernym	00903385
01411630	_derivationally_related_form	04372171
02179279	_also_see	01222360
06552814	_hypernym	06479665
02460619	_derivationally_related_form	10700201
00464962	_also_see	01926376
04820258	_derivationally_related_form	00939857
12778605	_hypernym	12205694
00285889	_derivationally_related_form	00490722
02387034	_verb_group	02553697
01170052	_derivationally_related_form	07885223
00772189	_derivationally_related_form	14379829
00829761	_hypernym	00829107
01632897	_derivationally_related_form	00105479
01372189	_hypernym	01511706
01143040	_derivationally_related_form	00406243
12804216	_member_meronym	12804352
00616153	_derivationally_related_form	05706629
11911591	_member_meronym	11977125
03128583	_derivationally_related_form	03051540
01115916	_derivationally_related_form	03328076
03065685	_derivationally_related_form	14854262
01802219	_derivationally_related_form	07042735
11803475	_member_meronym	11573660
01279978	_derivationally_related_form	05172596
04837931	_hypernym	04837232
07028373	_derivationally_related_form	01706756
00947719	_derivationally_related_form	01161290
10426749	_derivationally_related_form	00620554
10165448	_derivationally_related_form	02171039
09935434	_derivationally_related_form	02371684
01163847	_derivationally_related_form	03949442
02551602	_derivationally_related_form	10553805
02460199	_derivationally_related_form	13248393
02660147	_derivationally_related_form	03600977
02395115	_also_see	01073822
01894649	_derivationally_related_form	09990415
00240571	_hypernym	00151689
09857852	_hypernym	00007846
02153709	_derivationally_related_form	10575787
13872211	_derivationally_related_form	01551195
00364260	_derivationally_related_form	00158222
01721754	_hypernym	01721556
07286905	_derivationally_related_form	00917772
01182709	_derivationally_related_form	13777344
08491027	_derivationally_related_form	00990812
11502102	_derivationally_related_form	02758033
01578341	_member_meronym	01578575
02565687	_derivationally_related_form	00745005
00387897	_derivationally_related_form	01259005
10151570	_derivationally_related_form	01931768
00684480	_also_see	00550282
00375071	_derivationally_related_form	00236999
07187996	_hypernym	07187773
15266911	_derivationally_related_form	02735418
00197419	_hypernym	00197772
00698572	_derivationally_related_form	05982152
05273822	_has_part	05284851
05217168	_derivationally_related_form	02897524
02107248	_derivationally_related_form	05299178
06742932	_derivationally_related_form	00828374
13877918	_derivationally_related_form	00362128
02171039	_derivationally_related_form	00882159
10395390	_hypernym	00007846
04835028	_hypernym	04616059
01573627	_hypernym	01571904
07539511	_hypernym	07538965
00994076	_derivationally_related_form	06355894
06548498	_synset_domain_topic_of	08441203
01516534	_hypernym	01899262
02384275	_hypernym	02384041
05860200	_derivationally_related_form	01734502
10554455	_derivationally_related_form	02412939
09851876	_derivationally_related_form	01155687
08403225	_derivationally_related_form	10323182
02415831	_derivationally_related_form	00582868
00917300	_derivationally_related_form	06782680
05053688	_derivationally_related_form	01754421
12740196	_member_meronym	12751823
10526927	_derivationally_related_form	01952898
09952163	_hypernym	09624559
10293332	_hypernym	10412055
04858785	_hypernym	04858455
02466134	_derivationally_related_form	10592595
00275607	_hypernym	01463963
06304671	_hypernym	06284225
01082606	_derivationally_related_form	13924659
11856981	_member_meronym	11857528
13118569	_derivationally_related_form	13112664
00390906	_derivationally_related_form	01511380
13793776	_derivationally_related_form	02677332
02466496	_hypernym	02557199
00835903	_derivationally_related_form	00751529
09927305	_derivationally_related_form	01532589
00686447	_derivationally_related_form	14412725
04679738	_derivationally_related_form	00929362
10009671	_derivationally_related_form	00532115
12900148	_member_meronym	12902021
02035337	_also_see	01131043
02274516	_member_meronym	02278704
02689299	_derivationally_related_form	05088324
01370590	_also_see	01227137
01560511	_hypernym	01507175
02796412	_hypernym	02796623
04954683	_hypernym	04953954
00596807	_derivationally_related_form	10468962
12794135	_hypernym	12793015
09854510	_derivationally_related_form	02385634
13877918	_hypernym	13907415
00601043	_derivationally_related_form	05700087
00280853	_derivationally_related_form	02053941
12394861	_hypernym	11567411
00041188	_hypernym	00037396
00065639	_hypernym	02108026
07073447	_member_of_domain_usage	14950300
09758643	_derivationally_related_form	00845299
05682950	_derivationally_related_form	02678438
00235435	_derivationally_related_form	02379528
10575787	_derivationally_related_form	02153709
02227362	_hypernym	02228031
01705494	_derivationally_related_form	09947232
12892226	_member_meronym	12914048
01628449	_derivationally_related_form	10355449
00558371	_derivationally_related_form	00282050
00082308	_derivationally_related_form	03075768
06711855	_derivationally_related_form	00823669
00973077	_synset_domain_topic_of	08199025
10707233	_derivationally_related_form	00661091
00681429	_derivationally_related_form	00033615
03346455	_has_part	03719343
00020926	_derivationally_related_form	07491286
02274516	_member_meronym	02275921
13962166	_hypernym	13961642
00306426	_derivationally_related_form	01845720
10403876	_synset_domain_topic_of	02691156
01088923	_derivationally_related_form	00586262
09756637	_derivationally_related_form	05958208
00597385	_derivationally_related_form	05641959
01122149	_derivationally_related_form	02267060
00503237	_has_part	00166355
00754118	_hypernym	00752954
02009433	_derivationally_related_form	00053097
01981699	_derivationally_related_form	00988028
01806505	_derivationally_related_form	14407536
00965871	_derivationally_related_form	00686890
09999135	_derivationally_related_form	00848169
09206985	_derivationally_related_form	01921964
10577284	_derivationally_related_form	02242464
14966667	_hypernym	14938907
00780575	_similar_to	00779374
06593099	_derivationally_related_form	00590924
01355326	_hypernym	01342269
02576921	_derivationally_related_form	10076957
05402091	_derivationally_related_form	00457998
00044353	_derivationally_related_form	14482620
01563005	_hypernym	01557774
03967942	_derivationally_related_form	01478002
13282550	_derivationally_related_form	02253456
02528380	_derivationally_related_form	14477877
00236999	_derivationally_related_form	07413899
04980656	_derivationally_related_form	01053144
01067362	_hypernym	01066163
12591351	_hypernym	12582231
04802403	_derivationally_related_form	00632438
12346448	_hypernym	11567411
01279978	_also_see	02164402
01932973	_also_see	01115349
05432948	_hypernym	05432736
00161243	_derivationally_related_form	00676450
10467179	_hypernym	10164747
00864159	_derivationally_related_form	07233214
09837824	_derivationally_related_form	02343056
00285889	_derivationally_related_form	01912709
08102555	_hypernym	07992450
01931768	_hypernym	02441022
10655169	_derivationally_related_form	01612084
00372013	_hypernym	00363260
10196965	_derivationally_related_form	05152696
10345804	_derivationally_related_form	00953216
00365446	_derivationally_related_form	00357680
01751353	_similar_to	01749320
04914133	_hypernym	04912732
01513430	_hypernym	00173338
14889479	_derivationally_related_form	00239614
02080291	_member_meronym	02080415
07140978	_derivationally_related_form	00773432
02651424	_derivationally_related_form	01054227
05051896	_derivationally_related_form	00317888
06998748	_derivationally_related_form	09812338
07486628	_derivationally_related_form	01805684
01067816	_hypernym	00983824
05937524	_hypernym	05937112
06155567	_hypernym	06153846
07093759	_derivationally_related_form	01702514
13960117	_derivationally_related_form	00625774
07212424	_derivationally_related_form	01009240
01031256	_derivationally_related_form	10282920
00444519	_derivationally_related_form	05085572
00632627	_derivationally_related_form	05772356
01711965	_hypernym	01000214
05395548	_derivationally_related_form	04519153
01346003	_derivationally_related_form	00338641
13570574	_derivationally_related_form	00256507
00828237	_derivationally_related_form	00047945
02446651	_derivationally_related_form	00514871
02417504	_derivationally_related_form	10197967
09917593	_hypernym	09622049
10694258	_derivationally_related_form	00604811
01232738	_derivationally_related_form	10297983
05953416	_hypernym	05952979
10180580	_derivationally_related_form	01116585
01058574	_derivationally_related_form	06410776
07296428	_derivationally_related_form	00109660
02055649	_derivationally_related_form	00330160
14289942	_hypernym	14289590
07338114	_hypernym	07339329
01843689	_derivationally_related_form	10757193
00076563	_derivationally_related_form	00599835
02547586	_derivationally_related_form	09608709
00041899	_derivationally_related_form	02210855
00330160	_derivationally_related_form	00438178
00093327	_hypernym	00387310
01363648	_derivationally_related_form	03691128
01844048	_derivationally_related_form	10757193
06468951	_derivationally_related_form	01008437
01732172	_derivationally_related_form	10212780
12595801	_member_meronym	12595964
10387712	_derivationally_related_form	02339413
00248977	_derivationally_related_form	00205885
00927711	_hypernym	00927430
00926156	_derivationally_related_form	13512238
01930117	_derivationally_related_form	03242713
07099271	_derivationally_related_form	01964367
00792991	_derivationally_related_form	13951984
00627013	_derivationally_related_form	01150370
01256157	_hypernym	01552519
11923016	_hypernym	11579418
02245765	_hypernym	02376958
13911151	_derivationally_related_form	01604696
01596761	_hypernym	01504437
01359432	_verb_group	01212230
05373924	_hypernym	05418717
00052500	_has_part	00281752
02680814	_derivationally_related_form	01022483
01454810	_derivationally_related_form	10492202
00318035	_hypernym	00317207
12906334	_hypernym	11579418
01760143	_hypernym	01759326
01580050	_also_see	00903668
01309701	_derivationally_related_form	03996416
00243918	_hypernym	00199130
00251013	_derivationally_related_form	02741960
10553805	_hypernym	09608709
01845720	_hypernym	01843055
00311809	_hypernym	00306426
05822746	_derivationally_related_form	01018928
01570403	_derivationally_related_form	06793426
09140148	_member_of_domain_region	01294502
00021939	_hypernym	00003553
00561036	_derivationally_related_form	04714440
10403876	_synset_domain_topic_of	02958343
01644522	_derivationally_related_form	00159177
01835496	_also_see	02073714
07371293	_derivationally_related_form	02135048
10349243	_derivationally_related_form	02557199
05781800	_derivationally_related_form	00643473
04806804	_derivationally_related_form	02584981
02202509	_hypernym	01759182
01089878	_hypernym	02428924
00786458	_derivationally_related_form	07197021
02487573	_hypernym	02486932
00555138	_derivationally_related_form	02550516
10515194	_hypernym	09615465
00317888	_hypernym	00317700
01613463	_also_see	01125429
00636574	_derivationally_related_form	05774129
02415573	_derivationally_related_form	10442417
06661562	_hypernym	06660942
10311021	_hypernym	09629752
06892016	_derivationally_related_form	01719302
01056554	_hypernym	00941990
04526964	_hypernym	03183080
00548173	_derivationally_related_form	02382087
06468123	_derivationally_related_form	00244625
12322887	_member_meronym	12348774
11910835	_hypernym	08103777
01003570	_hypernym	00996969
02568999	_derivationally_related_form	00367552
01519727	_derivationally_related_form	02889035
00325110	_derivationally_related_form	01921964
02671421	_derivationally_related_form	02653706
02038357	_also_see	01909978
04682462	_derivationally_related_form	00510364
02872333	_hypernym	04099175
14051494	_hypernym	14034177
00795720	_derivationally_related_form	01638368
09998101	_derivationally_related_form	02573275
09962966	_hypernym	10476086
02706046	_derivationally_related_form	10603528
02308741	_hypernym	02199590
00244416	_derivationally_related_form	06468123
01688256	_derivationally_related_form	05766984
00107943	_verb_group	00107739
06998748	_hypernym	06873252
01055073	_derivationally_related_form	04980008
00715239	_derivationally_related_form	05916739
12892226	_member_meronym	12904720
12581381	_member_meronym	12582231
00468236	_verb_group	00468583
00921300	_derivationally_related_form	07262579
07518663	_derivationally_related_form	01803003
05074374	_hypernym	05072663
02408965	_hypernym	01158872
04348184	_hypernym	04552696
00101779	_derivationally_related_form	00836149
00467717	_derivationally_related_form	00999245
02308741	_derivationally_related_form	01089778
14449126	_derivationally_related_form	01188725
01524885	_member_meronym	01597194
02640440	_derivationally_related_form	05699434
12758639	_hypernym	11562747
07310507	_hypernym	07309781
01130169	_derivationally_related_form	02851099
00049636	_derivationally_related_form	02018524
14427239	_hypernym	14425974
13152742	_has_part	08373244
13262663	_derivationally_related_form	02344568
12778926	_member_meronym	12779233
00169806	_derivationally_related_form	09609871
01123598	_hypernym	01080366
13959931	_derivationally_related_form	00927578
09984298	_derivationally_related_form	00591622
00086809	_derivationally_related_form	10523519
04657876	_hypernym	04623612
05827253	_derivationally_related_form	01759326
01435380	_derivationally_related_form	06260121
10716389	_hypernym	10379758
00985106	_hypernym	00984609
02626604	_hypernym	00381601
02530861	_derivationally_related_form	07544647
07109847	_derivationally_related_form	00745187
02276527	_member_meronym	02277268
01806505	_derivationally_related_form	04687333
01921964	_also_see	01978576
07285403	_derivationally_related_form	00121046
01577635	_derivationally_related_form	00442847
05651680	_derivationally_related_form	00632627
02965300	_hypernym	04194289
02741357	_verb_group	02079933
01405044	_derivationally_related_form	00125629
07150644	_hypernym	07148192
00205046	_derivationally_related_form	00261029
02513740	_also_see	01549291
07486922	_derivationally_related_form	01828405
00947128	_derivationally_related_form	01158872
00509377	_derivationally_related_form	00184117
04983848	_derivationally_related_form	01501113
01292885	_derivationally_related_form	09900981
01298931	_derivationally_related_form	09873604
12329899	_member_meronym	12332718
02578510	_derivationally_related_form	07450651
13367070	_derivationally_related_form	02329733
03485997	_derivationally_related_form	01224001
02401661	_member_meronym	02402175
04952944	_hypernym	04952242
00312553	_hypernym	00306426
01782519	_also_see	02513740
00017222	_derivationally_related_form	11531090
02305245	_hypernym	01759182
01139830	_derivationally_related_form	02444662
02515341	_derivationally_related_form	05017458
04544979	_derivationally_related_form	01882170
07157273	_member_of_domain_usage	10153155
00620752	_derivationally_related_form	02406916
02712443	_derivationally_related_form	01257145
00672277	_hypernym	00698855
02456031	_derivationally_related_form	10150071
09424489	_derivationally_related_form	01183573
09682122	_hypernym	09681351
10185148	_derivationally_related_form	01826723
07342049	_hypernym	07296190
10741590	_hypernym	00007846
03320046	_hypernym	03183080
07325190	_derivationally_related_form	00345761
01250335	_derivationally_related_form	02482425
01825671	_also_see	00834198
10264219	_hypernym	00007846
13152742	_derivationally_related_form	00282790
02806261	_derivationally_related_form	00665886
06158346	_hypernym	06153846
00162167	_hypernym	00161225
01835496	_also_see	01921964
01501347	_hypernym	01500873
02416278	_verb_group	02416751
01135795	_derivationally_related_form	02593354
02159271	_member_meronym	02261883
02517169	_derivationally_related_form	02150948
06511560	_hypernym	06470073
02559180	_similar_to	02559862
01830946	_derivationally_related_form	01886756
02091410	_derivationally_related_form	06645039
05892096	_derivationally_related_form	00917300
08278924	_hypernym	08276720
10706812	_derivationally_related_form	05989479
03294833	_hypernym	03563967
01169317	_hypernym	01080366
05714161	_hypernym	05713737
13489037	_derivationally_related_form	00245457
02741960	_hypernym	02604760
04983848	_derivationally_related_form	01502195
06252743	_hypernym	06252138
00558371	_hypernym	00205885
00633443	_derivationally_related_form	05779712
01378556	_derivationally_related_form	05088324
02932019	_hypernym	03079741
02478059	_hypernym	02477334
02119659	_derivationally_related_form	14333136
02001858	_derivationally_related_form	05826914
06503724	_hypernym	06502378
13950440	_derivationally_related_form	02669477
01509079	_derivationally_related_form	10435988
08639776	_hypernym	08497294
05726596	_derivationally_related_form	00404642
02695895	_derivationally_related_form	00155487
00672433	_also_see	00672017
00348008	_derivationally_related_form	01884577
02742638	_hypernym	02693319
06508816	_hypernym	06647206
01768969	_derivationally_related_form	02636811
07829412	_derivationally_related_form	01364357
11564258	_hypernym	11562747
11733769	_member_meronym	11733904
00987071	_derivationally_related_form	07201804
00866702	_derivationally_related_form	01039925
02332999	_derivationally_related_form	10681557
02244956	_synset_domain_topic_of	01090446
10251779	_derivationally_related_form	00602255
10280130	_derivationally_related_form	00597634
00373278	_hypernym	00373130
12823164	_member_meronym	12823859
05397468	_hypernym	05263850
02076999	_hypernym	02015598
13860281	_hypernym	13783038
02587084	_derivationally_related_form	10011902
00658052	_derivationally_related_form	14429608
00621627	_derivationally_related_form	02371811
03722007	_hypernym	04608567
09786922	_hypernym	09882007
02565728	_hypernym	01429349
07331013	_derivationally_related_form	00478830
02388950	_derivationally_related_form	01232412
02661252	_derivationally_related_form	10419047
02560767	_hypernym	02367363
01636397	_hypernym	01631534
04555897	_hypernym	04437953
03803911	_derivationally_related_form	00622384
05821775	_hypernym	05820620
00021766	_also_see	00631391
14333433	_derivationally_related_form	00071178
02289061	_hypernym	01762525
12793284	_hypernym	12793015
10123711	_derivationally_related_form	15153787
10597505	_derivationally_related_form	01039330
10707233	_derivationally_related_form	00081725
01080064	_hypernym	01158872
10118844	_hypernym	00007846
00745187	_derivationally_related_form	07109847
02510337	_derivationally_related_form	05641959
07334490	_derivationally_related_form	00479391
02164402	_also_see	01497736
01093085	_derivationally_related_form	00161225
02407338	_hypernym	02530167
00022686	_derivationally_related_form	02309341
00506658	_hypernym	00430140
07445265	_hypernym	07311115
09858299	_derivationally_related_form	02241767
01184625	_derivationally_related_form	13366311
13286801	_synset_domain_topic_of	08441203
02123298	_derivationally_related_form	05722868
11703386	_member_meronym	11707668
06729499	_hypernym	06725877
05068080	_derivationally_related_form	02038791
00397760	_hypernym	00394610
07204911	_derivationally_related_form	02473431
01563005	_derivationally_related_form	08648322
00076114	_derivationally_related_form	07540081
08472890	_has_part	08233056
04935528	_derivationally_related_form	00052672
00359492	_hypernym	00386915
09944022	_hypernym	10307234
08550076	_derivationally_related_form	01310660
01194938	_derivationally_related_form	05268965
01524885	_member_meronym	01602353
00365188	_derivationally_related_form	00375071
09871095	_hypernym	09870208
00990655	_derivationally_related_form	09769345
12260208	_hypernym	11564734
07369604	_derivationally_related_form	00482893
00115500	_derivationally_related_form	01453256
02470175	_derivationally_related_form	01081628
02690384	_hypernym	02620587
01420928	_derivationally_related_form	10608803
05748285	_derivationally_related_form	00650353
01543817	_hypernym	01507175
04661151	_derivationally_related_form	00812580
01465218	_verb_group	01465365
12533190	_hypernym	12205694
01472807	_hypernym	00276373
03177349	_hypernym	03315023
00119524	_hypernym	00252019
02727825	_hypernym	03294048
07959269	_hypernym	07951464
00545501	_derivationally_related_form	01729431
02047263	_derivationally_related_form	02995998
00430191	_derivationally_related_form	04823866
12556307	_hypernym	11747468
00870453	_derivationally_related_form	01385170
01220885	_verb_group	01356750
00738747	_derivationally_related_form	07120524
10776339	_derivationally_related_form	01045419
00100551	_hypernym	02407987
00614057	_derivationally_related_form	07534108
07150850	_hypernym	07150644
14441825	_hypernym	13920835
10450303	_derivationally_related_form	13840719
14940100	_derivationally_related_form	00443984
01517662	_verb_group	01518047
00043195	_derivationally_related_form	02154508
05060189	_derivationally_related_form	00459498
02343056	_derivationally_related_form	08420278
02125223	_derivationally_related_form	05598147
00645771	_hypernym	00644583
10044879	_hypernym	10605985
01681940	_hypernym	01676755
00125126	_derivationally_related_form	01392237
01658188	_hypernym	01653873
02289845	_hypernym	01762525
04161981	_derivationally_related_form	01543998
00996102	_derivationally_related_form	10513120
03903424	_derivationally_related_form	01935476
06532330	_hypernym	06479665
02056971	_also_see	02056466
01190948	_derivationally_related_form	05829782
06999436	_derivationally_related_form	01686956
12219495	_hypernym	11567411
14475405	_hypernym	14473222
04620216	_hypernym	04616059
07157273	_member_of_domain_usage	05218119
10461747	_hypernym	10461424
05840188	_derivationally_related_form	02699141
02034300	_derivationally_related_form	00350380
00835903	_derivationally_related_form	06756407
00294884	_hypernym	00224901
01659248	_derivationally_related_form	00237078
07139700	_hypernym	06252138
09898346	_derivationally_related_form	01693727
00606006	_hypernym	00586262
14322699	_hypernym	14299637
02068413	_derivationally_related_form	07436100
01850315	_derivationally_related_form	00280586
11719468	_member_meronym	11738378
05128519	_hypernym	05123416
02123672	_also_see	02126022
08308497	_member_meronym	09953965
07184391	_hypernym	07183151
02983097	_derivationally_related_form	14046202
07991364	_derivationally_related_form	02023600
01588493	_verb_group	00508032
00665886	_derivationally_related_form	06650431
10443170	_hypernym	10707804
07525555	_derivationally_related_form	00733454
00953216	_derivationally_related_form	07221094
02055649	_derivationally_related_form	05058140
13855627	_hypernym	13854649
00192613	_derivationally_related_form	02269143
13295657	_derivationally_related_form	02208903
10136959	_derivationally_related_form	01146793
13780719	_derivationally_related_form	10235549
02505141	_hypernym	02504562
04782116	_derivationally_related_form	01587077
00162632	_derivationally_related_form	00763399
00235368	_hypernym	00441445
01129201	_verb_group	02687916
00779374	_derivationally_related_form	04702688
11827169	_hypernym	11565040
01577093	_derivationally_related_form	03204306
13969700	_derivationally_related_form	01765392
01189427	_hypernym	01196037
06495328	_derivationally_related_form	00794981
02130524	_derivationally_related_form	00877127
00082081	_derivationally_related_form	01207609
10608803	_hypernym	10178216
00942234	_derivationally_related_form	01256157
05154908	_derivationally_related_form	02547586
04499660	_hypernym	02735688
10279018	_derivationally_related_form	01623967
02091885	_hypernym	01835496
02728784	_hypernym	02727883
06806469	_derivationally_related_form	00836236
13904843	_derivationally_related_form	01559055
01500873	_derivationally_related_form	10629020
00133668	_hypernym	01173038
02033295	_derivationally_related_form	08681222
04598965	_hypernym	04426788
01024190	_derivationally_related_form	06333653
07963711	_derivationally_related_form	00193486
00344125	_also_see	00583990
05652396	_hypernym	05651971
08568978	_hypernym	08630039
13259917	_hypernym	13254985
02868326	_derivationally_related_form	05749619
02627934	_derivationally_related_form	09367991
01941093	_verb_group	01847845
01350971	_verb_group	01350699
02208903	_derivationally_related_form	10520804
01807314	_derivationally_related_form	07548366
00758972	_derivationally_related_form	01787106
01180351	_derivationally_related_form	03206908
04878861	_derivationally_related_form	00959731
06171040	_derivationally_related_form	10264437
00958334	_derivationally_related_form	01018630
05829480	_hypernym	05827684
04359589	_derivationally_related_form	01217043
07414566	_derivationally_related_form	00433232
06791372	_derivationally_related_form	00924612
06738281	_hypernym	06722453
00242808	_hypernym	00199130
05895723	_hypernym	05893653
08050678	_has_part	08164585
02294436	_hypernym	02199590
14018567	_derivationally_related_form	01190494
00657604	_hypernym	00658082
10419630	_hypernym	10716005
05766247	_derivationally_related_form	00938247
03386011	_derivationally_related_form	01606205
01785971	_derivationally_related_form	07516354
01088923	_derivationally_related_form	08624385
00663353	_hypernym	00664483
05093890	_hypernym	04916342
04055861	_synset_domain_topic_of	00314469
04384016	_has_part	03536568
00425905	_hypernym	00419644
08107499	_member_meronym	08108972
10787470	_derivationally_related_form	01484987
05216365	_has_part	05263850
00741272	_hypernym	00740712
10603528	_hypernym	09614047
00105479	_hypernym	00104539
00593613	_derivationally_related_form	10067968
00049197	_hypernym	00047945
01078783	_derivationally_related_form	04838210
00482893	_derivationally_related_form	07369604
01478423	_hypernym	01478002
01194483	_derivationally_related_form	02170427
01076046	_derivationally_related_form	01859221
00258695	_derivationally_related_form	01254013
02710294	_derivationally_related_form	00636574
01561143	_derivationally_related_form	07301543
02244956	_hypernym	02245765
12391477	_member_meronym	12404314
01215168	_derivationally_related_form	02556817
08482271	_derivationally_related_form	01935233
00865387	_verb_group	00814458
13928668	_derivationally_related_form	00040962
02036339	_derivationally_related_form	13864965
03050026	_hypernym	03122748
01082454	_synset_domain_topic_of	00471613
02208537	_derivationally_related_form	06523132
12760722	_hypernym	11567411
01343918	_also_see	00921014
01298931	_derivationally_related_form	00376400
10270878	_derivationally_related_form	01805684
05058140	_derivationally_related_form	02055649
05565696	_hypernym	05221895
14313154	_derivationally_related_form	00459498
11923016	_member_meronym	11923174
00445169	_derivationally_related_form	15046900
00004475	_derivationally_related_form	02614181
07436100	_hypernym	07407777
04618781	_derivationally_related_form	00007846
00360757	_derivationally_related_form	00641252
12662654	_hypernym	11579418
02391193	_derivationally_related_form	00605023
07161429	_derivationally_related_form	00875394
10395073	_derivationally_related_form	01432601
09873604	_derivationally_related_form	00334996
00209943	_derivationally_related_form	00352826
00860620	_derivationally_related_form	04684358
07460104	_derivationally_related_form	01086103
01640550	_verb_group	01753596
01649999	_hypernym	01645601
02080022	_hypernym	01864707
12902297	_member_meronym	12902662
01632411	_derivationally_related_form	00940709
10090498	_derivationally_related_form	02285629
02280132	_derivationally_related_form	00819274
07997703	_member_meronym	08103457
03195485	_derivationally_related_form	02652494
12816508	_hypernym	12205694
01002740	_derivationally_related_form	00908133
02128286	_derivationally_related_form	10786033
01612084	_derivationally_related_form	10655169
10171567	_derivationally_related_form	02028722
00470701	_verb_group	00471058
09609871	_derivationally_related_form	00126264
14440137	_hypernym	14439447
00898804	_derivationally_related_form	01697406
00621627	_hypernym	00620752
05774129	_derivationally_related_form	00111129
01424456	_derivationally_related_form	00854000
06887726	_hypernym	00033020
00875246	_hypernym	00874067
04096848	_hypernym	02796623
00625427	_hypernym	00621627
02678438	_derivationally_related_form	05832264
00230033	_hypernym	00205885
03405265	_derivationally_related_form	02336483
00296585	_hypernym	07951464
06410391	_derivationally_related_form	00855512
04161981	_derivationally_related_form	02334302
02582450	_derivationally_related_form	10266848
03545150	_derivationally_related_form	02459173
01970646	_synset_domain_topic_of	06095022
07123012	_hypernym	07120524
01187810	_hypernym	01181475
01158596	_derivationally_related_form	07884567
01363648	_derivationally_related_form	00712225
00101609	_derivationally_related_form	01205961
01023259	_derivationally_related_form	06613056
01074498	_derivationally_related_form	01476483
02652494	_hypernym	02649830
07157273	_member_of_domain_usage	00784934
02122164	_derivationally_related_form	14331873
05737153	_derivationally_related_form	01112364
00807461	_derivationally_related_form	10018021
05054863	_hypernym	05051249
00004605	_derivationally_related_form	14842091
05200169	_hypernym	04723816
12344996	_hypernym	11562747
02395782	_derivationally_related_form	15265518
01426153	_verb_group	01426397
00153961	_derivationally_related_form	00667224
00310666	_hypernym	00306426
02727883	_verb_group	02244956
12581381	_member_meronym	12590842
00815173	_hypernym	00803617
02447542	_derivationally_related_form	08060193
00243918	_derivationally_related_form	01664172
02447793	_hypernym	00891936
02500619	_derivationally_related_form	10752480
04213626	_hypernym	04362025
04928903	_derivationally_related_form	01687569
10342543	_derivationally_related_form	01044114
12745788	_hypernym	11562747
01653442	_derivationally_related_form	08060446
00604576	_hypernym	00607114
10253995	_hypernym	10451263
01552519	_also_see	01309701
01569566	_derivationally_related_form	00240938
10401829	_derivationally_related_form	01082606
01265475	_derivationally_related_form	01812068
02360448	_also_see	02103481
01061017	_derivationally_related_form	00318735
01173660	_derivationally_related_form	01152040
06619065	_derivationally_related_form	02148788
02367363	_derivationally_related_form	00037396
11758799	_hypernym	13104059
01551195	_derivationally_related_form	04693900
02487718	_derivationally_related_form	06373747
02401809	_derivationally_related_form	00206927
02232190	_derivationally_related_form	00315986
01632411	_derivationally_related_form	05633385
02282506	_derivationally_related_form	00811355
11734872	_hypernym	11571907
09190918	_derivationally_related_form	14007546
00939452	_hypernym	00927261
02073714	_hypernym	02075462
01074650	_derivationally_related_form	10112591
03104594	_derivationally_related_form	01742886
00386676	_derivationally_related_form	02030158
00562398	_derivationally_related_form	01147060
12391477	_member_meronym	12391745
01981036	_derivationally_related_form	09334396
00365471	_derivationally_related_form	00365188
01456463	_derivationally_related_form	04250026
05640184	_derivationally_related_form	01097031
00739662	_derivationally_related_form	03018802
01988080	_derivationally_related_form	05083328
01548193	_also_see	01226240
07168623	_hypernym	07168131
00295701	_derivationally_related_form	01845720
02406585	_derivationally_related_form	10671736
01318660	_hypernym	00015388
01377571	_derivationally_related_form	00988320
01676313	_member_meronym	01680137
11911591	_member_meronym	12015076
12090318	_member_meronym	12094786
13996571	_derivationally_related_form	02424128
00851239	_hypernym	00794079
00032823	_hypernym	00031921
09636339	_hypernym	09636106
00135504	_hypernym	00134780
02159271	_member_meronym	02232408
07988857	_derivationally_related_form	01293389
00264776	_derivationally_related_form	09614047
10673946	_hypernym	09882007
00398704	_derivationally_related_form	00382635
13489037	_derivationally_related_form	00252019
02308741	_derivationally_related_form	00090779
01773549	_hypernym	01772222
06561942	_derivationally_related_form	00869931
05721500	_derivationally_related_form	02106006
01582645	_derivationally_related_form	00263813
00114871	_derivationally_related_form	01454810
01549291	_also_see	01131043
00083124	_hypernym	00082714
01544692	_hypernym	01494310
00387310	_derivationally_related_form	07447022
05155821	_hypernym	05154517
00258857	_derivationally_related_form	07420770
14854581	_derivationally_related_form	00841986
01161017	_hypernym	01160342
02958343	_has_part	02911158
12280487	_member_meronym	12286372
02367363	_derivationally_related_form	00165942
09178999	_derivationally_related_form	00636888
04650201	_derivationally_related_form	01264336
00741685	_derivationally_related_form	00809654
01580644	_hypernym	01507175
01176897	_hypernym	01182709
01258852	_derivationally_related_form	00799798
00161243	_hypernym	00037396
02294436	_derivationally_related_form	10017794
01640550	_derivationally_related_form	03178782
10597234	_derivationally_related_form	02464866
02464132	_derivationally_related_form	00741272
03540595	_has_part	04549919
01017987	_derivationally_related_form	01995549
01674850	_member_meronym	01675225
01215392	_derivationally_related_form	00806502
01282142	_verb_group	01540693
01860795	_derivationally_related_form	01063697
14855724	_hypernym	14853947
02123672	_derivationally_related_form	04980008
02386012	_derivationally_related_form	08227214
11420139	_hypernym	11490638
00873603	_derivationally_related_form	05035961
05978812	_derivationally_related_form	00383275
01086572	_hypernym	01086081
00695523	_derivationally_related_form	02706816
01230710	_derivationally_related_form	07252378
00583246	_hypernym	00582388
13960464	_derivationally_related_form	02461723
02654416	_hypernym	02655135
01591490	_hypernym	01504437
01380638	_also_see	01976089
00838367	_hypernym	00838098
07313241	_derivationally_related_form	00365188
03876519	_derivationally_related_form	01684899
02556817	_hypernym	02556126
10541229	_hypernym	00007846
01477806	_derivationally_related_form	05008943
02064745	_also_see	01410363
00999787	_derivationally_related_form	00922867
02382948	_hypernym	02374451
00627013	_hypernym	00626188
02903204	_hypernym	03736970
03709644	_derivationally_related_form	01031256
05675130	_derivationally_related_form	00570590
07573696	_has_part	07580053
00583990	_also_see	02519555
01096497	_derivationally_related_form	01033458
01774136	_derivationally_related_form	07546465
06100778	_hypernym	06090869
08280124	_derivationally_related_form	02599939
12313005	_hypernym	08103777
01744611	_derivationally_related_form	10794014
00039021	_derivationally_related_form	02376958
00474492	_derivationally_related_form	10514784
01222666	_hypernym	01222477
05982152	_derivationally_related_form	00708980
06694796	_derivationally_related_form	00956687
10252075	_hypernym	10180178
01734502	_derivationally_related_form	01018630
01070102	_derivationally_related_form	09610660
00827638	_derivationally_related_form	01347678
11447851	_derivationally_related_form	01902783
00224901	_hypernym	00126264
10056103	_derivationally_related_form	00164816
01657254	_derivationally_related_form	00379754
01675963	_derivationally_related_form	00262596
00372013	_derivationally_related_form	02230056
10028765	_derivationally_related_form	01098706
02504131	_also_see	00583990
01136614	_derivationally_related_form	02746365
08236438	_derivationally_related_form	02449011
10787470	_hypernym	09619168
05568767	_hypernym	05474346
00357275	_derivationally_related_form	01592669
12535820	_member_meronym	12536040
12286372	_hypernym	11564734
01538498	_hypernym	01507175
01811736	_derivationally_related_form	14405225
09988703	_derivationally_related_form	02011685
02431320	_derivationally_related_form	10580030
00939857	_derivationally_related_form	07232655
10099375	_derivationally_related_form	02600255
00336260	_derivationally_related_form	04692908
08572467	_derivationally_related_form	02729023
06418693	_hypernym	06417598
00797878	_hypernym	00795720
01529036	_member_meronym	01535310
13878112	_derivationally_related_form	02048891
05845140	_derivationally_related_form	01654628
02635659	_derivationally_related_form	11410625
00251013	_derivationally_related_form	00035758
03206718	_hypernym	02756098
00525446	_derivationally_related_form	01027859
01629403	_hypernym	01617192
01702514	_derivationally_related_form	10444194
04494204	_has_part	03960950
06425065	_derivationally_related_form	00235918
00746718	_hypernym	00753428
01033189	_hypernym	00939277
00896497	_hypernym	01012073
00199309	_derivationally_related_form	05849284
02280845	_hypernym	01762525
04362025	_hypernym	00021939
00981544	_hypernym	00941990
00059019	_derivationally_related_form	15226214
02471327	_derivationally_related_form	10059162
05121418	_hypernym	05107765
06717170	_member_of_domain_usage	09715521
01133876	_also_see	01372049
01775535	_derivationally_related_form	01459422
00048129	_derivationally_related_form	00640828
00598954	_derivationally_related_form	05808218
02064745	_derivationally_related_form	04748836
02005948	_derivationally_related_form	09810166
06522501	_hypernym	06520944
01104624	_derivationally_related_form	09998101
01517515	_derivationally_related_form	00335814
01934554	_derivationally_related_form	13960117
15233778	_synset_domain_topic_of	00523513
04026053	_derivationally_related_form	00475183
00664110	_derivationally_related_form	00084230
04231693	_hypernym	03100490
03005769	_hypernym	03051540
01600191	_hypernym	01423285
00334996	_derivationally_related_form	09873604
01968569	_derivationally_related_form	07445480
01206849	_derivationally_related_form	10717589
01981436	_hypernym	02005948
00317888	_derivationally_related_form	01018366
00290740	_hypernym	00441445
03916470	_hypernym	03916031
00164152	_hypernym	00163779
05040275	_derivationally_related_form	02324397
01770501	_hypernym	01767949
01369758	_also_see	01566185
04348359	_derivationally_related_form	02472693
07570720	_derivationally_related_form	01204191
01633343	_derivationally_related_form	10383816
09627906	_derivationally_related_form	02210119
07111047	_derivationally_related_form	00952182
01505254	_derivationally_related_form	04019696
00406365	_derivationally_related_form	01580467
02454312	_derivationally_related_form	10451590
02506361	_derivationally_related_form	07520612
00092293	_hypernym	00203866
04626705	_derivationally_related_form	00988287
00343249	_derivationally_related_form	02046755
00380083	_derivationally_related_form	00184117
00730538	_hypernym	00730247
08440630	_derivationally_related_form	10011902
03916470	_derivationally_related_form	00043480
02179279	_derivationally_related_form	04867130
02028994	_hypernym	02030158
04871374	_derivationally_related_form	01222360
01080691	_verb_group	01079480
01212230	_also_see	01392237
02851099	_hypernym	04014297
10700201	_derivationally_related_form	01054335
02747709	_derivationally_related_form	05051896
01613463	_also_see	01475282
09629752	_derivationally_related_form	02102002
01785971	_derivationally_related_form	14036539
01775164	_derivationally_related_form	09622302
00105479	_derivationally_related_form	01507143
00678282	_hypernym	00704690
12213635	_member_meronym	12214245
11942366	_hypernym	11579418
02388403	_derivationally_related_form	04921900
06289250	_hypernym	06286395
02530861	_also_see	00853776
05058140	_derivationally_related_form	02055975
00594836	_derivationally_related_form	10014939
10115082	_derivationally_related_form	02075049
00363260	_hypernym	00351485
01459422	_also_see	01246579
03641706	_hypernym	03357376
12213635	_member_meronym	12215373
01428853	_derivationally_related_form	07976936
00445467	_hypernym	00140123
12260021	_hypernym	11534677
02274253	_also_see	02559180
06467445	_derivationally_related_form	02752695
14002279	_derivationally_related_form	01602318
06608143	_hypernym	06607339
00774107	_synset_domain_topic_of	08441203
06539178	_synset_domain_topic_of	08441203
06505517	_hypernym	06502378
10776339	_derivationally_related_form	01048939
11466043	_hypernym	11452218
00732960	_also_see	01459422
02077656	_verb_group	01433294
05928118	_derivationally_related_form	01635432
02155248	_derivationally_related_form	02103481
06717170	_member_of_domain_usage	09645091
08574314	_hypernym	08630985
00620554	_synset_domain_topic_of	00903559
02505358	_verb_group	01516534
00557813	_derivationally_related_form	11512818
00357680	_derivationally_related_form	00366275
07135734	_derivationally_related_form	00941990
01325774	_verb_group	01325536
07326557	_derivationally_related_form	00770437
05718935	_derivationally_related_form	10340312
09469285	_synset_domain_topic_of	01326291
03279153	_hypernym	03800933
09385911	_hypernym	00002452
08624385	_hypernym	08621598
00138599	_derivationally_related_form	01425709
04692908	_derivationally_related_form	00336260
09643670	_hypernym	10787470
14379703	_derivationally_related_form	00621058
00213694	_derivationally_related_form	01097743
04148054	_has_part	02848216
07345166	_derivationally_related_form	01878063
00116376	_derivationally_related_form	01455184
11750508	_hypernym	12495146
02461314	_derivationally_related_form	05186306
01803936	_hypernym	02376958
09854510	_derivationally_related_form	01591621
07947958	_hypernym	07942152
10444194	_derivationally_related_form	01702514
00685683	_derivationally_related_form	00203342
00876665	_derivationally_related_form	07143137
01740608	_synset_domain_topic_of	00916464
00698855	_derivationally_related_form	10225219
12216382	_hypernym	11567411
11715207	_member_meronym	11715430
00414179	_derivationally_related_form	01165043
01118449	_verb_group	01119169
02067889	_derivationally_related_form	07407272
03139749	_derivationally_related_form	00159880
05090441	_derivationally_related_form	00240293
01753788	_derivationally_related_form	00240184
02636811	_derivationally_related_form	01772222
01940403	_derivationally_related_form	10096217
02225959	_hypernym	01342529
01884383	_derivationally_related_form	00335988
00858781	_derivationally_related_form	09913329
02545272	_derivationally_related_form	00796315
12549976	_member_meronym	12550210
10494935	_derivationally_related_form	02000868
00043902	_derivationally_related_form	01405044
05726596	_derivationally_related_form	00480969
04055861	_hypernym	03670849
12003407	_hypernym	11579418
01494310	_also_see	01489465
10375690	_hypernym	09867956
02270473	_hypernym	01762525
01612053	_also_see	01123148
02418205	_derivationally_related_form	05769471
02259241	_derivationally_related_form	01109687
12902021	_hypernym	12900462
01489332	_derivationally_related_form	00123234
00290276	_hypernym	00279835
12574866	_hypernym	13112664
01345109	_derivationally_related_form	01074694
06784639	_derivationally_related_form	01831308
00649481	_hypernym	00789138
05195362	_derivationally_related_form	00765649
10458111	_derivationally_related_form	00733044
00963570	_derivationally_related_form	10630188
02419773	_derivationally_related_form	00621476
00003553	_derivationally_related_form	00050693
09278537	_derivationally_related_form	00335366
04484160	_hypernym	02681518
06740644	_derivationally_related_form	00895304
00584367	_derivationally_related_form	02407987
02003601	_hypernym	02001858
09900981	_derivationally_related_form	01293389
00449295	_derivationally_related_form	01086103
00951781	_hypernym	00948206
00806049	_derivationally_related_form	03056010
10412055	_derivationally_related_form	01904930
01627965	_derivationally_related_form	04780605
02313250	_derivationally_related_form	01150200
01684899	_hypernym	01685313
04021798	_hypernym	03736970
09879744	_derivationally_related_form	00013172
01017987	_derivationally_related_form	00781000
00643250	_derivationally_related_form	05624700
09765278	_derivationally_related_form	01719921
00564857	_derivationally_related_form	13905792
01022008	_hypernym	01017987
01780919	_member_meronym	01781071
01018928	_derivationally_related_form	06755568
00779360	_derivationally_related_form	10524973
13118707	_hypernym	13112664
00503164	_derivationally_related_form	05827684
15140892	_derivationally_related_form	10261041
10400998	_derivationally_related_form	06780309
03122748	_derivationally_related_form	01332730
00855933	_hypernym	00845909
00872886	_derivationally_related_form	09775663
10670668	_derivationally_related_form	02453889
00612114	_derivationally_related_form	00146572
01647229	_derivationally_related_form	00237078
00630380	_derivationally_related_form	05785508
05644727	_derivationally_related_form	02357228
06201042	_derivationally_related_form	00864159
01250335	_hypernym	00220522
05941423	_derivationally_related_form	00683280
08550076	_derivationally_related_form	01313923
05656537	_derivationally_related_form	02129289
00458276	_hypernym	00126264
02162947	_hypernym	02133435
04685195	_derivationally_related_form	00532886
11412727	_hypernym	11410625
00890100	_verb_group	00890590
10105085	_derivationally_related_form	01654271
10201535	_derivationally_related_form	02576921
01512259	_derivationally_related_form	00567044
00348312	_derivationally_related_form	01909397
00077645	_also_see	00251809
10409752	_derivationally_related_form	02249741
01166926	_hypernym	01080366
00545557	_verb_group	00402130
01739814	_derivationally_related_form	09779790
00973056	_derivationally_related_form	06619428
01061017	_hypernym	00740577
14503665	_derivationally_related_form	02662076
01453256	_derivationally_related_form	00115500
14575180	_derivationally_related_form	00436668
00830448	_synset_domain_topic_of	06080522
01665932	_hypernym	01662784
01517662	_derivationally_related_form	10734568
00065791	_also_see	00249721
03278248	_hypernym	03294048
12806455	_member_meronym	12807409
01628449	_derivationally_related_form	07325190
14503665	_hypernym	14501726
06063588	_derivationally_related_form	01169194
01229631	_derivationally_related_form	14526182
11804082	_member_meronym	11827169
01074694	_hypernym	01074498
01428853	_derivationally_related_form	00847340
00144850	_hypernym	00109660
07532440	_hypernym	00026192
00575741	_derivationally_related_form	02407987
02560164	_hypernym	02506546
01768402	_hypernym	08103777
00209546	_derivationally_related_form	00795863
01689752	_derivationally_related_form	05064037
05706629	_hypernym	05706228
14451911	_hypernym	13920835
01884577	_derivationally_related_form	05069199
09849598	_hypernym	09622302
00831191	_has_part	00836788
02252931	_derivationally_related_form	01120448
00647929	_hypernym	00644583
00033615	_derivationally_related_form	02645007
02449847	_derivationally_related_form	00373130
01989669	_derivationally_related_form	04861486
13999206	_hypernym	13998576
00014549	_derivationally_related_form	10484526
10335931	_hypernym	09629752
14395018	_derivationally_related_form	02074092
01662118	_derivationally_related_form	07331013
01627965	_derivationally_related_form	04780958
05827684	_derivationally_related_form	00770437
01578821	_hypernym	00173338
00439343	_derivationally_related_form	02670186
08008335	_member_meronym	08400965
01549291	_also_see	02513740
08523483	_hypernym	08497294
01439745	_derivationally_related_form	00138956
01276361	_derivationally_related_form	06799897
03244388	_derivationally_related_form	02057656
03872495	_hypernym	03873064
02198332	_hypernym	01759182
02212825	_derivationally_related_form	10003283
02607909	_derivationally_related_form	10373801
01131043	_also_see	02037272
01249724	_also_see	01254013
00915722	_hypernym	00913705
00453935	_derivationally_related_form	01140794
01134522	_derivationally_related_form	02950256
00999245	_derivationally_related_form	01589497
00119568	_hypernym	00045250
06398401	_hypernym	06392001
01654628	_derivationally_related_form	00923995
05022457	_hypernym	05021884
00368847	_derivationally_related_form	00612114
11498040	_hypernym	11458624
01161017	_derivationally_related_form	00824292
09792237	_derivationally_related_form	05217168
05563266	_has_part	05577410
13875970	_hypernym	13865483
00838816	_derivationally_related_form	01174973
02334867	_derivationally_related_form	02738031
02752567	_derivationally_related_form	05061345
01097960	_derivationally_related_form	01156438
02685665	_also_see	02690093
03384535	_derivationally_related_form	01659248
12307611	_member_meronym	12307756
11927901	_member_meronym	11929477
05299178	_derivationally_related_form	02107248
07363883	_derivationally_related_form	01989873
00646542	_derivationally_related_form	06469694
01182293	_derivationally_related_form	01072780
01235137	_derivationally_related_form	02344060
13275495	_derivationally_related_form	02301502
00151689	_derivationally_related_form	07355887
02167571	_derivationally_related_form	00984609
08890097	_has_part	08881674
10762064	_hypernym	10412055
05250659	_derivationally_related_form	01435380
12255934	_member_meronym	12256112
07248507	_derivationally_related_form	00976365
10409011	_hypernym	10453357
00650353	_derivationally_related_form	05748285
00235110	_verb_group	00318326
07197021	_derivationally_related_form	00786458
15255804	_has_part	15256245
00418903	_derivationally_related_form	02574205
11414608	_hypernym	11410625
00972621	_derivationally_related_form	01119169
01209678	_derivationally_related_form	04946553
02154508	_derivationally_related_form	00151497
08556491	_hypernym	08630985
01425511	_hypernym	01424456
00472230	_derivationally_related_form	07331013
01530846	_hypernym	01507175
00081072	_synset_domain_topic_of	00612160
07805254	_hypernym	07800091
02087745	_derivationally_related_form	01173660
02198532	_hypernym	02188699
01663169	_member_meronym	01664862
00212808	_derivationally_related_form	02316304
12823859	_hypernym	13100677
00632438	_also_see	00023383
00185104	_derivationally_related_form	00482473
01562584	_member_meronym	01566082
00820352	_verb_group	00820611
01456771	_derivationally_related_form	07351031
01760944	_derivationally_related_form	00802318
08647616	_synset_domain_topic_of	07006119
06733939	_derivationally_related_form	00954422
00926472	_derivationally_related_form	00868910
00204943	_hypernym	00204439
12398682	_member_meronym	12401122
10216403	_hypernym	10478960
05200169	_derivationally_related_form	00001740
08890097	_has_part	08893223
05832264	_derivationally_related_form	01765908
02746365	_hypernym	02738031
00403092	_derivationally_related_form	00258857
02513740	_similar_to	02515214
01803380	_derivationally_related_form	10695555
05663671	_synset_domain_topic_of	01124794
00045646	_derivationally_related_form	01097960
06185748	_derivationally_related_form	02478059
02448185	_derivationally_related_form	08008335
04424418	_hypernym	00001740
04838210	_hypernym	04837232
06717170	_member_of_domain_usage	09680657
11412727	_derivationally_related_form	00123170
13860281	_derivationally_related_form	02634808
02505358	_hypernym	02504562
07291312	_derivationally_related_form	01620854
00918820	_hypernym	00915722
07516354	_derivationally_related_form	01787106
09622745	_derivationally_related_form	01426397
01651444	_derivationally_related_form	08008335
01384439	_derivationally_related_form	01014066
13864763	_hypernym	00027807
00909573	_derivationally_related_form	10561861
01254253	_hypernym	01016832
01797730	_derivationally_related_form	07305234
09476521	_hypernym	09190918
02589245	_hypernym	02376958
10172793	_derivationally_related_form	07495551
09941383	_hypernym	09623038
01279978	_also_see	00902652
01215392	_derivationally_related_form	00803815
00158185	_derivationally_related_form	01803936
00941974	_derivationally_related_form	01310660
11665781	_member_meronym	12723835
10509605	_hypernym	00007846
03322940	_hypernym	03699975
12823164	_hypernym	11562747
00150287	_derivationally_related_form	09957614
00146138	_verb_group	02626604
00977301	_derivationally_related_form	01123887
11083656	_instance_hypernym	10483890
13555446	_derivationally_related_form	02736778
07201804	_derivationally_related_form	00989084
01254013	_derivationally_related_form	14286549
07969695	_derivationally_related_form	13812607
03104594	_derivationally_related_form	01693881
12309403	_hypernym	11567411
09810364	_derivationally_related_form	02275365
02502536	_derivationally_related_form	01248191
00536304	_hypernym	00126264
02049190	_hypernym	01907258
01127215	_derivationally_related_form	04096848
12946088	_member_meronym	12946578
04714440	_hypernym	04731497
00550282	_derivationally_related_form	00634472
00414627	_verb_group	00414409
15203229	_has_part	15299225
01222360	_derivationally_related_form	04868748
05267548	_hypernym	05267345
00532607	_derivationally_related_form	00932624
04596852	_hypernym	03051540
02958343	_has_part	03327841
01848465	_verb_group	00613393
02973017	_hypernym	04359335
07191279	_derivationally_related_form	00754942
01794363	_hypernym	01794668
02539788	_derivationally_related_form	01129532
05755156	_derivationally_related_form	00604576
10461747	_derivationally_related_form	00776523
06715786	_hypernym	06714976
07412668	_derivationally_related_form	02766390
02733122	_derivationally_related_form	10466918
09903639	_derivationally_related_form	00682928
04850117	_derivationally_related_form	00956131
02001858	_derivationally_related_form	10494935
05601357	_hypernym	05600637
14324274	_derivationally_related_form	02121511
08663354	_hypernym	08510666
13445296	_derivationally_related_form	02047263
00658052	_derivationally_related_form	14428160
12025507	_hypernym	11672400
12299165	_hypernym	11562747
05978812	_derivationally_related_form	10625860
05846932	_synset_domain_topic_of	06000644
01594611	_hypernym	01507175
00583990	_also_see	02291843
00503982	_derivationally_related_form	04746842
00266253	_derivationally_related_form	00208210
05402091	_derivationally_related_form	00458276
01900150	_hypernym	05470189
07233863	_derivationally_related_form	00864910
02611002	_hypernym	02610845
10553627	_derivationally_related_form	02357228
06542267	_hypernym	06539770
02355596	_hypernym	01111816
02290153	_hypernym	01762525
00490722	_hypernym	00489837
00877127	_hypernym	00876874
02304648	_hypernym	02205272
01462468	_derivationally_related_form	02850732
04723816	_hypernym	00024264
02314275	_derivationally_related_form	01150200
00949288	_derivationally_related_form	01417451
01158690	_derivationally_related_form	00468236
10467395	_derivationally_related_form	00596807
01673668	_member_meronym	01691782
00666886	_derivationally_related_form	00075515
07557165	_hypernym	07570720
02301502	_hypernym	02251743
01236164	_derivationally_related_form	10178216
03540595	_has_part	03541091
05021884	_hypernym	05009170
02513268	_hypernym	02400037
12220247	_hypernym	11567411
02636132	_derivationally_related_form	13793504
00751529	_hypernym	00751145
02553697	_hypernym	00253761
07829412	_derivationally_related_form	00535844
02466670	_derivationally_related_form	08163273
00368592	_derivationally_related_form	00968211
00661824	_verb_group	00662182
00336539	_derivationally_related_form	09243769
06891022	_derivationally_related_form	00989602
00314469	_derivationally_related_form	02909006
01543817	_member_meronym	01543936
01654271	_derivationally_related_form	03318438
03002351	_derivationally_related_form	07570720
06762711	_derivationally_related_form	01033189
00761713	_derivationally_related_form	07148192
06417598	_hypernym	06410904
10039391	_hypernym	10599354
02150948	_derivationally_related_form	00880662
01221790	_hypernym	01221611
05761918	_derivationally_related_form	02620724
07174433	_derivationally_related_form	00624801
10706812	_derivationally_related_form	05952979
04904851	_hypernym	04904664
00632627	_derivationally_related_form	05651680
10273064	_derivationally_related_form	01099592
12532886	_hypernym	12205694
01181295	_verb_group	01180351
00246217	_also_see	01139623
00950431	_derivationally_related_form	05822746
11736216	_hypernym	11571907
06210363	_hypernym	06196284
00841628	_derivationally_related_form	01191838
00749767	_derivationally_related_form	02537407
05211044	_derivationally_related_form	10191943
03089014	_hypernym	03895293
01588172	_also_see	01226240
12913352	_hypernym	11579418
02079389	_hypernym	02076196
07242104	_derivationally_related_form	00775156
04694441	_derivationally_related_form	00509958
04701460	_derivationally_related_form	00431447
06163751	_derivationally_related_form	10269785
06717170	_member_of_domain_usage	09642917
01023820	_derivationally_related_form	02438535
10742005	_hypernym	10741821
07090721	_hypernym	07089751
06206800	_derivationally_related_form	02457233
00719734	_hypernym	00670261
02029492	_verb_group	01377571
00749767	_hypernym	00749574
01556671	_hypernym	01504437
02889035	_hypernym	04484160
00318735	_derivationally_related_form	01061017
02522319	_verb_group	02523521
00619869	_derivationally_related_form	05895723
03736970	_hypernym	03738472
00208797	_hypernym	00206927
00348746	_derivationally_related_form	07290905
00168588	_derivationally_related_form	01047937
03624134	_derivationally_related_form	01231652
00065639	_derivationally_related_form	10595647
00751944	_derivationally_related_form	00834259
11911591	_member_meronym	11976715
02406916	_hypernym	02407338
10466198	_derivationally_related_form	02219940
01368192	_also_see	00364479
02405390	_verb_group	01308381
02435867	_derivationally_related_form	00242583
09614684	_derivationally_related_form	01130169
01158872	_derivationally_related_form	10741590
01649999	_verb_group	01771390
02744651	_derivationally_related_form	03499142
04590746	_hypernym	03736970
00673766	_hypernym	00672433
02271137	_derivationally_related_form	10216106
05737153	_derivationally_related_form	00657550
00165178	_derivationally_related_form	02395395
05760202	_hypernym	05701944
00976487	_derivationally_related_form	10482220
04898208	_derivationally_related_form	09923673
10703905	_derivationally_related_form	01014821
05500992	_has_part	05605192
05219724	_hypernym	05217168
01538928	_derivationally_related_form	04694441
00598056	_hypernym	00586262
01256600	_hypernym	01552519
01797347	_derivationally_related_form	07534430
00470084	_derivationally_related_form	00233386
09831962	_hypernym	00007846
02087745	_derivationally_related_form	00571609
09822955	_hypernym	09761403
01414916	_derivationally_related_form	00133668
01349493	_hypernym	01609287
00776732	_derivationally_related_form	02292535
02210855	_derivationally_related_form	00077419
03790512	_has_part	03616763
01037650	_derivationally_related_form	07137129
05822612	_hypernym	05821775
07494363	_derivationally_related_form	01792567
01252566	_derivationally_related_form	00414627
00428404	_derivationally_related_form	04820258
01982866	_hypernym	01974062
02376542	_hypernym	01321854
00143204	_derivationally_related_form	07441619
00949619	_derivationally_related_form	02809692
04712735	_hypernym	04731497
00671190	_hypernym	00671351
01941093	_derivationally_related_form	00815801
03101156	_derivationally_related_form	01664172
00897746	_hypernym	00897564
07326880	_hypernym	07326557
11911591	_member_meronym	11971600
01204191	_derivationally_related_form	01057759
01589217	_also_see	01227137
10003283	_derivationally_related_form	00816556
05840188	_hypernym	05839024
02125223	_also_see	02125460
01578341	_member_meronym	01578821
05658226	_derivationally_related_form	02191546
10043643	_hypernym	10619642
01556178	_derivationally_related_form	02157557
01613463	_also_see	02451951
01542567	_member_meronym	01543817
01662118	_derivationally_related_form	10008716
02276902	_hypernym	02274822
01904930	_hypernym	01835496
05696425	_derivationally_related_form	02257767
01930117	_derivationally_related_form	03789946
07209965	_derivationally_related_form	00910973
14458593	_hypernym	00024720
02199999	_member_meronym	02201758
11692952	_hypernym	11534677
02059916	_hypernym	01835496
00702601	_hypernym	00701040
07160116	_hypernym	07159791
10200531	_derivationally_related_form	02346136
04680285	_hypernym	03178782
00228535	_derivationally_related_form	02352019
00906735	_derivationally_related_form	15224692
07561112	_derivationally_related_form	01190012
12550968	_hypernym	11585340
10409634	_derivationally_related_form	02251743
02094569	_derivationally_related_form	11498203
01489989	_hypernym	00452512
01039330	_derivationally_related_form	06876144
01085237	_hypernym	00672277
13961642	_derivationally_related_form	10261041
00034115	_derivationally_related_form	06691989
02446164	_derivationally_related_form	10632576
00803325	_derivationally_related_form	06691083
10443170	_derivationally_related_form	02345048
01992503	_hypernym	01835496
13873502	_has_part	13874384
01171644	_derivationally_related_form	01146918
02339413	_derivationally_related_form	01157138
10028765	_derivationally_related_form	01097500
06381869	_derivationally_related_form	01702514
04802629	_derivationally_related_form	00617748
06773976	_derivationally_related_form	01647867
01106808	_derivationally_related_form	02244956
00803617	_hypernym	00407535
06398401	_derivationally_related_form	02609764
02506546	_derivationally_related_form	01129920
01246579	_also_see	01740892
10434725	_derivationally_related_form	01642437
14480420	_hypernym	14479615
07215377	_hypernym	07213395
01798782	_hypernym	01792567
12099803	_hypernym	11567411
02589245	_derivationally_related_form	09958724
10553627	_derivationally_related_form	02225492
00789906	_derivationally_related_form	02274299
00039488	_hypernym	00038849
07238694	_derivationally_related_form	00989201
00565302	_synset_domain_topic_of	00523513
07342049	_derivationally_related_form	01734502
10760340	_derivationally_related_form	02400760
00908672	_derivationally_related_form	04780958
01042531	_derivationally_related_form	07211752
01597737	_hypernym	01597336
00884317	_derivationally_related_form	05950733
11415842	_derivationally_related_form	01752884
02053941	_verb_group	01849746
04060647	_hypernym	04176528
10212780	_hypernym	00007846
01734502	_derivationally_related_form	05860200
00800940	_hypernym	00798245
00966718	_hypernym	00403092
10752480	_derivationally_related_form	02500619
01018366	_derivationally_related_form	00317888
02919414	_derivationally_related_form	01487008
00643250	_also_see	01865197
03065424	_derivationally_related_form	01523986
01940403	_derivationally_related_form	02190166
00093327	_derivationally_related_form	00068333
01104624	_derivationally_related_form	00752954
02230247	_hypernym	02229055
12914048	_hypernym	11579418
02270404	_hypernym	02238085
02670186	_derivationally_related_form	00173159
01924882	_derivationally_related_form	00289388
00201407	_derivationally_related_form	06722186
01125693	_synset_domain_topic_of	08441203
02760622	_verb_group	02762468
00747135	_derivationally_related_form	06539770
07413899	_derivationally_related_form	00237511
02584097	_derivationally_related_form	10006842
12318378	_hypernym	13110915
00468791	_derivationally_related_form	00346296
01588493	_derivationally_related_form	07202579
02207206	_derivationally_related_form	00079018
00054628	_hypernym	01617192
01711445	_derivationally_related_form	06893885
02216710	_hypernym	02219094
02544348	_derivationally_related_form	09606009
02314275	_derivationally_related_form	06540863
06742426	_derivationally_related_form	00955601
07412092	_hypernym	07283608
13262663	_derivationally_related_form	02345048
02462602	_hypernym	05220461
00655779	_also_see	00650577
13954253	_hypernym	00024720
02710673	_also_see	02703952
01627355	_derivationally_related_form	01867295
09821253	_derivationally_related_form	01120069
12570126	_member_meronym	12570394
00616361	_hypernym	00616153
02123672	_derivationally_related_form	00882961
01506157	_derivationally_related_form	00170156
02420232	_derivationally_related_form	10078806
00612114	_derivationally_related_form	02032634
02011685	_derivationally_related_form	09993252
00258854	_derivationally_related_form	00384620
10737431	_hypernym	00007846
00306314	_derivationally_related_form	05202497
01711071	_derivationally_related_form	07494363
00696700	_hypernym	02165543
07883860	_derivationally_related_form	02001858
09998907	_hypernym	09812338
00704690	_derivationally_related_form	10438172
00886978	_derivationally_related_form	01041111
00344040	_derivationally_related_form	01345109
07123870	_derivationally_related_form	01054186
00813044	_hypernym	00813978
01849746	_verb_group	02053941
00059019	_verb_group	00059376
00258854	_derivationally_related_form	00199912
13582013	_derivationally_related_form	00946755
01196037	_derivationally_related_form	04882622
00240131	_derivationally_related_form	00351638
02487718	_derivationally_related_form	07417043
00745005	_hypernym	00732746
01466978	_derivationally_related_form	08565701
15153787	_derivationally_related_form	00249679
09804806	_derivationally_related_form	06144081
10072708	_hypernym	00007846
05797177	_hypernym	05770926
13140535	_member_meronym	13140699
00765213	_derivationally_related_form	01151407
01994442	_derivationally_related_form	00053913
04164989	_hypernym	03892891
01494310	_also_see	01981036
01792567	_hypernym	01790020
01027508	_derivationally_related_form	06539770
01762525	_hypernym	08108972
10029068	_derivationally_related_form	01690294
09730533	_hypernym	09686536
08590172	_hypernym	08589801
06791372	_derivationally_related_form	01039330
03648219	_hypernym	04580298
07157273	_member_of_domain_usage	06609909
02158846	_hypernym	02157557
00331655	_derivationally_related_form	01883344
06878071	_derivationally_related_form	00029025
10174695	_hypernym	09730533
00908099	_derivationally_related_form	01076488
01068773	_hypernym	01069578
00213343	_hypernym	01108753
10200531	_hypernym	10103485
10276045	_derivationally_related_form	01258828
00387897	_derivationally_related_form	01276970
11723655	_member_meronym	11723770
05760202	_derivationally_related_form	00611802
05514905	_has_part	05517406
02415831	_hypernym	02413480
01986367	_member_meronym	01987938
02274482	_derivationally_related_form	00085432
02290956	_derivationally_related_form	10191613
01354673	_derivationally_related_form	13792692
08651247	_hypernym	08673395
01191158	_synset_domain_topic_of	08441203
01931768	_derivationally_related_form	10151570
05666700	_derivationally_related_form	01722980
[truncated: 23,901 more rows]
