# Supplementary material
Source: ML conference proceedings conference paper supplement (https://proceedings.neurips.cc/paper_files/paper/2021/hash/0fd600c953cde8121262e322ef09f70e-Abstract.html)
Supplement: Supplementary file 1 [file 0fd600c953cde8121262e322ef09f70e-Supplemental.zip › Supplementary_Material_Paper_8745/data/GraIL-BM_WN18RR_v3/train/valid.txt]

12501745	_member_meronym	12552081
00230746	_hypernym	00156601
01679178	_hypernym	01657723
06726939	_hypernym	06726158
04711435	_hypernym	04709253
07491708	_derivationally_related_form	01820302
14526182	_derivationally_related_form	01229631
00263947	_derivationally_related_form	00510364
01310660	_derivationally_related_form	09304750
02706816	_derivationally_related_form	00695523
11955398	_hypernym	11579418
01348174	_derivationally_related_form	03682487
02439732	_derivationally_related_form	01144876
00428000	_derivationally_related_form	02490877
02687251	_derivationally_related_form	13875970
11911591	_member_meronym	11949707
02964389	_hypernym	03748886
00156101	_also_see	00712419
00233335	_hypernym	02510337
01885239	_derivationally_related_form	07348545
07020895	_derivationally_related_form	10339966
03768346	_hypernym	03302121
01170243	_derivationally_related_form	14049711
00771632	_hypernym	00770437
04640927	_hypernym	04623612
00262596	_derivationally_related_form	01675963
12594324	_has_part	12594533
00749574	_hypernym	00732746
02109678	_also_see	00727564
02102484	_also_see	00190115
07105475	_member_of_domain_usage	15294745
09902954	_hypernym	00007846
04202417	_derivationally_related_form	02325968
02405390	_derivationally_related_form	00197419
00255710	_derivationally_related_form	02742842
13650045	_hypernym	13603305
09615807	_hypernym	00007846
04872531	_derivationally_related_form	01309991
01426153	_derivationally_related_form	00854000
00856193	_derivationally_related_form	01430633
03490884	_hypernym	04359589
01321002	_derivationally_related_form	04250026
09943239	_hypernym	09942970
04737934	_derivationally_related_form	00356648
12262327	_member_meronym	12263738
02667900	_hypernym	02657219
11480698	_hypernym	11419404
01921204	_hypernym	01904930
00737188	_derivationally_related_form	01595596
01506157	_derivationally_related_form	00961001
10448983	_derivationally_related_form	00752335
00961586	_derivationally_related_form	06762711
10197967	_hypernym	09626031
02651424	_derivationally_related_form	03195485
01579868	_member_meronym	01581041
01431987	_hypernym	01226215
12265266	_hypernym	11573173
11839297	_hypernym	11573660
02861509	_derivationally_related_form	01521912
02394662	_derivationally_related_form	10005280
05309725	_has_part	05309591
02345048	_derivationally_related_form	00777439
05194578	_derivationally_related_form	00747418
01142519	_derivationally_related_form	01435380
02549847	_hypernym	02549581
04372171	_derivationally_related_form	01411630
08008017	_derivationally_related_form	01487008
02309341	_derivationally_related_form	00503164
14459422	_derivationally_related_form	10415230
00282050	_derivationally_related_form	01992503
00938419	_derivationally_related_form	01582645
00407090	_hypernym	00404403
00876665	_derivationally_related_form	07142566
00201722	_derivationally_related_form	00945205
00595146	_hypernym	00586262
01827535	_also_see	01824751
07121361	_hypernym	07120524
06715638	_derivationally_related_form	00852922
07339329	_derivationally_related_form	02569790
02191773	_hypernym	02190166
02958343	_has_part	03518631
02438861	_derivationally_related_form	01134479
05600637	_has_part	05599617
05838176	_hypernym	05837957
00803815	_derivationally_related_form	01215392
00204439	_derivationally_related_form	02584097
12818346	_hypernym	13109733
04812268	_hypernym	04723816
01190012	_derivationally_related_form	10012377
01003249	_verb_group	01002740
01170962	_derivationally_related_form	01092366
00382109	_hypernym	00381680
05240850	_hypernym	05239808
00248659	_derivationally_related_form	00282050
00532607	_derivationally_related_form	00002684
00417001	_derivationally_related_form	00044673
09609232	_derivationally_related_form	13353607
00752298	_derivationally_related_form	02576921
01740608	_derivationally_related_form	00918820
06742426	_hypernym	07170753
00278551	_derivationally_related_form	04952242
02278704	_member_meronym	02278839
02192992	_derivationally_related_form	00882702
00243373	_hypernym	07453195
00663160	_synset_domain_topic_of	07073447
05757049	_derivationally_related_form	00602255
01708676	_verb_group	01894649
00710005	_derivationally_related_form	01008801
02325968	_derivationally_related_form	04202417
10678472	_hypernym	10525134
11665781	_member_meronym	11567411
00615887	_derivationally_related_form	00994076
01169194	_derivationally_related_form	00671351
00224901	_derivationally_related_form	09476521
03721797	_hypernym	00021939
11964269	_hypernym	11579418
02556817	_derivationally_related_form	07248060
02199590	_hypernym	02220461
05418717	_hypernym	05417975
00904548	_derivationally_related_form	04807971
06013741	_synset_domain_topic_of	06000644
05767733	_derivationally_related_form	01636397
03294833	_derivationally_related_form	01548718
00632627	_hypernym	00628491
13162297	_hypernym	09257949
00770437	_derivationally_related_form	00007347
00193130	_derivationally_related_form	13985818
01498498	_hypernym	01494310
05872982	_hypernym	05835747
00684480	_derivationally_related_form	00701877
01340439	_derivationally_related_form	10080337
00068617	_derivationally_related_form	10511239
06516595	_hypernym	06472025
00413876	_derivationally_related_form	00027167
09629065	_derivationally_related_form	05946687
14004572	_derivationally_related_form	01891249
11947079	_hypernym	11579418
02027411	_derivationally_related_form	07959943
05685030	_derivationally_related_form	00621734
02137907	_hypernym	02137710
00682230	_hypernym	00672433
10468962	_hypernym	10469346
01115162	_derivationally_related_form	02244956
05837957	_derivationally_related_form	00648977
00158804	_derivationally_related_form	01014990
06797169	_derivationally_related_form	00921300
00504019	_hypernym	00503715
00036762	_hypernym	00035189
01754576	_hypernym	01698271
05044822	_hypernym	05044673
12821257	_hypernym	11744859
05916739	_hypernym	05833840
02263027	_derivationally_related_form	13270038
00772189	_derivationally_related_form	09997404
00689673	_derivationally_related_form	13273550
00740053	_derivationally_related_form	05734559
00164579	_synset_domain_topic_of	06128570
02519991	_derivationally_related_form	13341756
00380083	_derivationally_related_form	01418667
04564698	_hypernym	00021939
02729023	_derivationally_related_form	10162991
08427453	_synset_domain_topic_of	08199025
00952841	_verb_group	00937208
13273550	_synset_domain_topic_of	13308999
00664276	_derivationally_related_form	00154233
10149867	_derivationally_related_form	02494356
02059462	_derivationally_related_form	10502576
00359903	_derivationally_related_form	00429060
02334302	_derivationally_related_form	08647616
00321486	_derivationally_related_form	03873064
00004258	_hypernym	00003553
04758452	_hypernym	04756887
05776212	_hypernym	05775407
08617963	_derivationally_related_form	02693168
11929027	_hypernym	13118707
01662274	_hypernym	01342529
10442232	_derivationally_related_form	01921204
03055809	_derivationally_related_form	00612612
09957156	_derivationally_related_form	06216160
02225492	_derivationally_related_form	10553627
06650701	_derivationally_related_form	00872886
03643907	_derivationally_related_form	01398032
06726158	_derivationally_related_form	00965871
07491286	_derivationally_related_form	01806505
02387486	_derivationally_related_form	00883297
01328513	_hypernym	01296462
00006484	_has_part	05445668
10682380	_derivationally_related_form	01011031
01637633	_derivationally_related_form	05769726
04870340	_hypernym	04868748
01368863	_hypernym	01368597
02501278	_derivationally_related_form	01187810
01659248	_derivationally_related_form	04677514
05044822	_derivationally_related_form	02406585
00264529	_hypernym	00264366
07332691	_derivationally_related_form	00470701
12778219	_hypernym	13109733
00331655	_derivationally_related_form	02012344
10225219	_hypernym	09769636
07051975	_derivationally_related_form	10277912
01822936	_also_see	02550296
09810166	_derivationally_related_form	02005948
10012484	_derivationally_related_form	07561112
01841079	_derivationally_related_form	07311115
07087777	_hypernym	07070429
01097031	_derivationally_related_form	10622053
01148283	_hypernym	01127623
01467370	_derivationally_related_form	02875013
04677514	_hypernym	04673965
00470386	_derivationally_related_form	00951781
00781000	_hypernym	00962447
02001858	_derivationally_related_form	00320486
11911591	_member_meronym	11956208
02200509	_hypernym	02311060
00944924	_hypernym	00634472
10475297	_derivationally_related_form	01747945
04852750	_derivationally_related_form	02513740
06764244	_hypernym	06763273
00799798	_derivationally_related_form	00232863
06794666	_derivationally_related_form	02508245
10722575	_derivationally_related_form	00833702
02399331	_hypernym	02391803
06170498	_derivationally_related_form	10380672
00884317	_derivationally_related_form	10482054
01990281	_derivationally_related_form	08660339
00910135	_derivationally_related_form	10018021
00310386	_hypernym	00230746
02669081	_hypernym	02673965
00638981	_also_see	02099019
02472223	_derivationally_related_form	06481320
10482054	_hypernym	09610660
06389230	_hypernym	05128519
00996448	_also_see	00075515
01170243	_also_see	02037708
07361128	_hypernym	07283608
02297409	_derivationally_related_form	14449405
00198631	_derivationally_related_form	00679389
12391745	_member_meronym	12394861
01689411	_hypernym	01674464
01311103	_derivationally_related_form	03996416
02226183	_hypernym	02159955
01220885	_derivationally_related_form	14420464
02314658	_hypernym	02314275
01843689	_hypernym	01843055
02571251	_derivationally_related_form	10213652
12307756	_hypernym	13112664
01977155	_derivationally_related_form	05677952
01445932	_derivationally_related_form	00838816
01277649	_hypernym	01552519
04577769	_has_part	03643907
10635275	_derivationally_related_form	02301502
00073343	_hypernym	00072989
05532944	_hypernym	05328867
00761713	_hypernym	00813978
00070965	_hypernym	00066216
10682380	_hypernym	09610660
01416871	_derivationally_related_form	10608803
00062806	_derivationally_related_form	02526085
00990812	_derivationally_related_form	09769345
00896688	_synset_domain_topic_of	08199025
00726300	_verb_group	00726784
00996969	_derivationally_related_form	02704349
01426077	_synset_domain_topic_of	06043075
01912893	_derivationally_related_form	04544979
00388210	_derivationally_related_form	00338071
02273545	_member_meronym	02293135
02818832	_has_part	03731164
14498404	_derivationally_related_form	00492706
00134780	_derivationally_related_form	01414626
00996485	_derivationally_related_form	10597234
00843468	_derivationally_related_form	06561942
10468962	_derivationally_related_form	00813790
01170052	_derivationally_related_form	00843128
07289956	_has_part	07307477
00998399	_hypernym	01000214
00717208	_hypernym	00716531
01266491	_derivationally_related_form	00861560
10640620	_hypernym	10235549
02151966	_derivationally_related_form	10770059
01186810	_derivationally_related_form	02582450
07487695	_derivationally_related_form	01762283
00276883	_hypernym	01463963
07545161	_hypernym	07544647
04650201	_derivationally_related_form	10191943
14493426	_derivationally_related_form	00172732
01387786	_derivationally_related_form	00356790
07507742	_derivationally_related_form	01799794
00894221	_derivationally_related_form	06626446
04882622	_hypernym	04881829
11960540	_hypernym	11579418
02311387	_derivationally_related_form	10032524
02545045	_hypernym	02367363
01112584	_verb_group	00669970
02806261	_derivationally_related_form	01202728
12660009	_member_meronym	12663554
00844254	_derivationally_related_form	01762283
07251779	_derivationally_related_form	00858781
11921200	_hypernym	11579418
01259951	_derivationally_related_form	11445564
06780678	_derivationally_related_form	01693727
12779437	_member_meronym	12779851
02440523	_hypernym	05225602
01803380	_derivationally_related_form	00425905
01688771	_derivationally_related_form	10455619
00282076	_hypernym	00126264
10724372	_derivationally_related_form	02393086
10180178	_hypernym	10389398
02128653	_derivationally_related_form	00879759
02727039	_verb_group	02685951
00240184	_derivationally_related_form	01642437
02125223	_derivationally_related_form	04980008
01755627	_derivationally_related_form	05054863
02023992	_derivationally_related_form	03420559
10401829	_hypernym	09816771
05054863	_derivationally_related_form	01755627
02471327	_derivationally_related_form	00050037
04992570	_derivationally_related_form	02192570
10077593	_derivationally_related_form	01828736
07365193	_derivationally_related_form	02523521
04435870	_hypernym	03183080
00497705	_derivationally_related_form	13496517
02386675	_derivationally_related_form	07453638
00119873	_derivationally_related_form	02987454
05854150	_hypernym	05835747
01449974	_derivationally_related_form	00318735
13313733	_hypernym	00351638
09833997	_derivationally_related_form	02583545
01775535	_hypernym	01775164
04631700	_derivationally_related_form	02278939
12539074	_hypernym	13100677
09879744	_hypernym	10202363
04059701	_hypernym	04213626
00983824	_derivationally_related_form	10743675
02472693	_derivationally_related_form	04348359
01580077	_hypernym	01578575
02513269	_also_see	01548193
00172710	_hypernym	00044150
01131473	_derivationally_related_form	01147451
00151497	_derivationally_related_form	02154508
02489456	_hypernym	02382087
06469694	_derivationally_related_form	01006421
05718254	_hypernym	05712076
05785508	_derivationally_related_form	02418872
01474513	_derivationally_related_form	02443049
14586769	_derivationally_related_form	01603303
13343526	_derivationally_related_form	02545272
02290461	_derivationally_related_form	05142641
00691516	_verb_group	00971015
05577190	_hypernym	05221895
04620558	_hypernym	04620216
02554922	_hypernym	02556126
10450303	_derivationally_related_form	00611972
10656488	_derivationally_related_form	03120454
00630026	_hypernym	00628491
00452293	_derivationally_related_form	01144657
05003090	_hypernym	05002822
02518813	_hypernym	01429349
00909363	_derivationally_related_form	07532440
05703429	_derivationally_related_form	02169352
00121678	_derivationally_related_form	05789808
14036203	_hypernym	14023997
00250259	_derivationally_related_form	01738774
01680264	_hypernym	01676755
01136614	_derivationally_related_form	09811852
00230276	_hypernym	00230033
00887463	_derivationally_related_form	01206553
07445896	_derivationally_related_form	02082690
08109624	_synset_domain_topic_of	06037666
09626589	_derivationally_related_form	02106506
09994943	_hypernym	00007846
06278136	_hypernym	07109019
01030820	_derivationally_related_form	00525446
00884011	_derivationally_related_form	07226545
03546340	_derivationally_related_form	02459173
03873064	_derivationally_related_form	01526956
00976653	_derivationally_related_form	07248801
09781504	_hypernym	09610660
00050652	_derivationally_related_form	03051540
02343056	_derivationally_related_form	09837824
02435867	_derivationally_related_form	08233056
02520509	_derivationally_related_form	00095121
02741960	_derivationally_related_form	00251013
06593099	_hypernym	06591442
00556193	_derivationally_related_form	00509377
00356790	_derivationally_related_form	01387786
02766687	_hypernym	02767308
08399586	_hypernym	08398773
10706812	_synset_domain_topic_of	00933420
10042300	_derivationally_related_form	01166351
01264050	_derivationally_related_form	00877083
00043411	_synset_domain_topic_of	06095022
08198137	_hypernym	08208016
06740183	_derivationally_related_form	00896803
00192836	_derivationally_related_form	09402704
00625774	_derivationally_related_form	13960117
13860281	_derivationally_related_form	00930599
00795863	_derivationally_related_form	00209546
04649051	_derivationally_related_form	01264336
05658826	_hypernym	05658603
12554242	_member_meronym	12554526
09843602	_derivationally_related_form	00035603
07246742	_hypernym	06252138
14018567	_derivationally_related_form	00088532
01792567	_derivationally_related_form	14322699
01664172	_derivationally_related_form	00243918
03290771	_derivationally_related_form	02016523
01691057	_hypernym	01582645
01921964	_derivationally_related_form	13102409
01552519	_derivationally_related_form	03154073
14853947	_hypernym	14856263
01251128	_similar_to	01252566
00440786	_hypernym	00439958
14083790	_synset_domain_topic_of	06055946
01122194	_derivationally_related_form	01168569
01510827	_hypernym	01850315
04153751	_derivationally_related_form	01353169
07157273	_member_of_domain_usage	06611147
04620558	_derivationally_related_form	01229631
12501745	_member_meronym	12538603
00810598	_hypernym	00809465
07175575	_derivationally_related_form	00804139
00905852	_derivationally_related_form	06741305
01028748	_verb_group	00971015
00376400	_derivationally_related_form	01369758
12090318	_member_meronym	12096223
00100253	_hypernym	06157326
06647206	_derivationally_related_form	00612042
11937965	_hypernym	11579418
07148192	_hypernym	07140659
01594978	_derivationally_related_form	00358290
10742005	_derivationally_related_form	10741821
01649999	_verb_group	01767949
02051694	_hypernym	01835496
06610332	_derivationally_related_form	01037650
02493260	_derivationally_related_form	00511041
15274863	_hypernym	15113229
00782527	_derivationally_related_form	05695232
14456435	_derivationally_related_form	00457998
01866192	_derivationally_related_form	07441619
01219075	_derivationally_related_form	00692907
05625465	_hypernym	05624700
00709205	_hypernym	00658082
01889610	_derivationally_related_form	00347652
04050410	_hypernym	04451818
07988857	_derivationally_related_form	01292885
00489837	_derivationally_related_form	00996969
00462092	_derivationally_related_form	01079604
00789138	_derivationally_related_form	00633864
15140405	_derivationally_related_form	10261041
04016240	_derivationally_related_form	01560731
02244956	_derivationally_related_form	01110274
02671880	_derivationally_related_form	02080577
02697120	_derivationally_related_form	14541852
09893191	_hypernym	09943239
13989051	_derivationally_related_form	01364008
02049696	_derivationally_related_form	07310642
01191755	_derivationally_related_form	01085237
10001647	_derivationally_related_form	00754942
02554422	_derivationally_related_form	07251984
08287586	_hypernym	07965085
07536074	_hypernym	07535670
03791235	_has_part	03432129
00662182	_hypernym	00664483
00920336	_verb_group	00918872
00433232	_derivationally_related_form	07370410
05767733	_derivationally_related_form	01635432
00895304	_derivationally_related_form	10677713
10779775	_derivationally_related_form	01552219
10313580	_derivationally_related_form	06077648
00261029	_hypernym	00248977
01171183	_derivationally_related_form	07901587
12281788	_hypernym	12281241
00411009	_derivationally_related_form	06226057
00637259	_derivationally_related_form	00868910
05563266	_derivationally_related_form	01906322
00522068	_derivationally_related_form	07073447
00760402	_derivationally_related_form	00033020
00169458	_hypernym	00046534
01144657	_derivationally_related_form	10193026
01177118	_hypernym	01165043
08164585	_derivationally_related_form	02432530
12015525	_hypernym	12205694
10412055	_derivationally_related_form	01912893
00456596	_derivationally_related_form	05696020
04714440	_derivationally_related_form	00561036
00053913	_derivationally_related_form	01994442
02454312	_hypernym	00647929
01061489	_also_see	00727564
02991122	_derivationally_related_form	09812338
02390949	_derivationally_related_form	07453638
00704690	_derivationally_related_form	05898568
02028722	_derivationally_related_form	13933841
01163620	_derivationally_related_form	00922327
08233056	_derivationally_related_form	02435867
12006081	_hypernym	11579418
00909573	_derivationally_related_form	10148305
05919866	_derivationally_related_form	00955148
07167415	_derivationally_related_form	02148788
01654628	_derivationally_related_form	09878275
05984584	_derivationally_related_form	00596644
00880662	_derivationally_related_form	02150948
11698895	_member_meronym	11699071
03391770	_hypernym	04361095
05003090	_derivationally_related_form	01904930
00714944	_hypernym	00935005
00285889	_derivationally_related_form	02091410
02517169	_similar_to	02515341
01807882	_derivationally_related_form	04687333
00545501	_derivationally_related_form	01731031
05068461	_hypernym	05074774
07142365	_derivationally_related_form	00813044
02273545	_member_meronym	02291024
01237167	_derivationally_related_form	01118449
01747945	_hypernym	01691057
11804082	_member_meronym	11827775
00611433	_hypernym	00609953
01507143	_also_see	01304716
01384439	_hypernym	02304982
13867641	_derivationally_related_form	02033295
02400037	_hypernym	02397637
02117333	_hypernym	02116118
02527431	_hypernym	02526085
01336159	_hypernym	01332730
01529036	_member_meronym	01533780
15277730	_derivationally_related_form	02066939
02274516	_hypernym	01759182
00678282	_derivationally_related_form	01144355
00270215	_derivationally_related_form	01230283
12740196	_member_meronym	12745788
01654628	_hypernym	01617192
01070892	_synset_domain_topic_of	06136258
02227487	_hypernym	02227741
00802946	_derivationally_related_form	01762839
04836683	_derivationally_related_form	02406916
09855630	_synset_domain_topic_of	06037666
01526956	_derivationally_related_form	03872495
07212424	_hypernym	07212190
03359755	_hypernym	04145056
00383952	_hypernym	01066163
05075602	_derivationally_related_form	01711749
09178999	_derivationally_related_form	00634472
05555917	_derivationally_related_form	00257535
00955601	_derivationally_related_form	00371487
13758745	_derivationally_related_form	02291708
10093908	_derivationally_related_form	00300537
00722232	_derivationally_related_form	05704266
01558883	_derivationally_related_form	13904843
04839676	_hypernym	04854389
01531998	_hypernym	00356258
01632411	_derivationally_related_form	06732013
01551871	_verb_group	01684337
04728786	_hypernym	04723816
00004475	_has_part	00006484
09944022	_derivationally_related_form	08324514
01930482	_hypernym	01912159
02084252	_derivationally_related_form	00555138
05763412	_hypernym	05762998
00094460	_derivationally_related_form	00041899
10212780	_derivationally_related_form	01686132
07449862	_derivationally_related_form	01186208
05051896	_hypernym	05051249
01222884	_also_see	02466111
00633443	_derivationally_related_form	10634316
02027612	_derivationally_related_form	08182379
00009147	_derivationally_related_form	01318660
04391838	_derivationally_related_form	00998399
00065070	_hypernym	02604760
00232542	_derivationally_related_form	08436759
02279819	_member_meronym	02279972
00779601	_derivationally_related_form	15274074
01951480	_also_see	02402825
00736216	_derivationally_related_form	00634276
05051896	_derivationally_related_form	00781000
07495551	_derivationally_related_form	01794363
01580050	_derivationally_related_form	14450691
00616153	_derivationally_related_form	04665813
00954422	_also_see	02193194
06373747	_derivationally_related_form	02526934
01414916	_hypernym	01400044
06470073	_hypernym	06362953
07160296	_hypernym	07160116
01991472	_hypernym	01989873
00388065	_hypernym	00126264
13458571	_hypernym	00029677
02037090	_derivationally_related_form	04051549
00043480	_derivationally_related_form	03916470
00366275	_derivationally_related_form	00357680
00374224	_derivationally_related_form	00227165
01224517	_derivationally_related_form	00851933
01292885	_derivationally_related_form	07985223
03931044	_derivationally_related_form	01635432
00407535	_hypernym	00030358
12263738	_hypernym	12262553
13547199	_derivationally_related_form	00474492
10580030	_derivationally_related_form	02431320
00616153	_derivationally_related_form	10351625
02151625	_hypernym	05297523
14889479	_derivationally_related_form	00273963
06003682	_hypernym	06000644
01518924	_hypernym	01223182
00521478	_derivationally_related_form	11505546
01578821	_member_meronym	01579578
00855512	_hypernym	00670261
00610374	_derivationally_related_form	05762998
01478002	_derivationally_related_form	02853218
00666510	_derivationally_related_form	06470073
02045043	_derivationally_related_form	00342028
10292316	_derivationally_related_form	01621555
00095329	_derivationally_related_form	02250625
00630026	_derivationally_related_form	06158346
00660971	_derivationally_related_form	00874806
09993901	_derivationally_related_form	02418205
00663160	_derivationally_related_form	09761403
01871979	_derivationally_related_form	11498203
10143725	_derivationally_related_form	02255462
01965464	_derivationally_related_form	00428270
00125126	_hypernym	00124880
02467662	_derivationally_related_form	00385791
02418421	_verb_group	02418686
00727564	_similar_to	00728826
00240293	_hypernym	00153263
02812482	_derivationally_related_form	08552138
00632236	_derivationally_related_form	05892096
03343560	_hypernym	03346455
01457206	_derivationally_related_form	00357275
03244388	_derivationally_related_form	01930482
02666239	_derivationally_related_form	04748836
01578341	_member_meronym	01579868
04666837	_derivationally_related_form	01475831
10592397	_derivationally_related_form	02466134
01020936	_hypernym	01019524
04530566	_hypernym	03125870
08152657	_hypernym	00031264
02219940	_derivationally_related_form	10466198
00378664	_derivationally_related_form	04694090
01533120	_derivationally_related_form	05118251
11834148	_member_meronym	11834272
01215392	_hypernym	01212519
08513718	_derivationally_related_form	02333689
01247804	_derivationally_related_form	10691600
00158996	_derivationally_related_form	10195261
03706653	_hypernym	03744840
03277771	_hypernym	03183080
01321002	_derivationally_related_form	10487182
14578471	_derivationally_related_form	02766328
01054335	_derivationally_related_form	10523519
00418615	_hypernym	00418025
02758753	_hypernym	02671421
02008396	_hypernym	02009433
07504111	_derivationally_related_form	01808374
00443984	_hypernym	00140123
01149470	_verb_group	01080064
09824361	_hypernym	09617867
01810447	_derivationally_related_form	07517737
02939919	_derivationally_related_form	07440979
12555069	_hypernym	11585340
00976487	_derivationally_related_form	07248507
00417001	_hypernym	00126264
13791389	_derivationally_related_form	02568884
01981436	_derivationally_related_form	09334396
14437552	_hypernym	14436875
07342049	_derivationally_related_form	02595662
03094503	_hypernym	03575240
01076488	_hypernym	01073995
10768903	_derivationally_related_form	01535246
11410625	_derivationally_related_form	02560767
00332154	_derivationally_related_form	14997012
03265032	_hypernym	03154073
02193496	_hypernym	01762525
07805254	_derivationally_related_form	00331082
00073828	_derivationally_related_form	00617748
07176243	_derivationally_related_form	02316649
07969695	_member_meronym	10308275
06877078	_hypernym	06876309
10486349	_hypernym	09608709
02326355	_hypernym	01315613
13489037	_derivationally_related_form	00094460
01636397	_derivationally_related_form	05625465
00744443	_derivationally_related_form	00069879
02472293	_has_part	05217168
13279262	_derivationally_related_form	02253456
09770472	_hypernym	10162991
05602132	_hypernym	05289861
10058411	_derivationally_related_form	01190948
01755504	_hypernym	01653013
02693168	_derivationally_related_form	08617963
02394445	_derivationally_related_form	10005280
00908351	_derivationally_related_form	01129532
15280497	_derivationally_related_form	01929254
00940842	_hypernym	00927261
05736593	_derivationally_related_form	00695761
02043665	_derivationally_related_form	07250339
00827638	_hypernym	00817680
06763681	_derivationally_related_form	01705257
00135311	_derivationally_related_form	01229976
07335243	_derivationally_related_form	01161635
00442063	_hypernym	00503164
01149480	_hypernym	01148614
01516534	_verb_group	01646300
01064560	_derivationally_related_form	14407536
05651399	_hypernym	05650329
01254013	_hypernym	01254324
00158804	_hypernym	00156601
05566504	_derivationally_related_form	00924431
00397953	_derivationally_related_form	02468261
00818553	_hypernym	00817311
02500902	_hypernym	00788564
10565302	_hypernym	10067968
10599806	_derivationally_related_form	01704236
00896803	_derivationally_related_form	05823054
00728826	_similar_to	00727564
07310642	_derivationally_related_form	02049696
00616153	_derivationally_related_form	00418615
06763681	_derivationally_related_form	01024190
00732746	_derivationally_related_form	02517202
08420278	_derivationally_related_form	02343056
10046527	_hypernym	00007846
10426749	_derivationally_related_form	00903559
12005500	_member_meronym	12005656
00911048	_derivationally_related_form	01654628
11999455	_hypernym	11579418
00511212	_derivationally_related_form	02493260
04928903	_hypernym	04916342
12823164	_member_meronym	12824909
07486229	_derivationally_related_form	01825237
01991472	_derivationally_related_form	07364115
04039041	_hypernym	03576215
02199999	_member_meronym	02201252
00353782	_hypernym	00351638
00056930	_derivationally_related_form	07320302
01449974	_derivationally_related_form	00315986
00158222	_derivationally_related_form	00364260
00395333	_derivationally_related_form	00471711
00375071	_hypernym	00374063
01701311	_hypernym	01698271
00082870	_hypernym	00077419
00658052	_derivationally_related_form	01003729
02068413	_derivationally_related_form	04287351
02175578	_derivationally_related_form	07397761
03195485	_derivationally_related_form	02459173
01492052	_derivationally_related_form	14419164
12591523	_hypernym	11556857
01017738	_derivationally_related_form	14547369
01051331	_derivationally_related_form	00413876
01414626	_derivationally_related_form	00134780
02538765	_derivationally_related_form	06661562
10060621	_derivationally_related_form	07419599
00384620	_derivationally_related_form	00095971
00009492	_hypernym	00009147
00741478	_derivationally_related_form	02463704
10214637	_hypernym	09614315
01039925	_derivationally_related_form	00475819
01097500	_derivationally_related_form	10512201
00161225	_hypernym	00162688
02658283	_derivationally_related_form	00141806
01009871	_hypernym	01008378
10771392	_hypernym	09629752
00858568	_hypernym	00860292
02295208	_derivationally_related_form	10401639
12756286	_hypernym	11562747
01811736	_hypernym	01761706
01014731	_derivationally_related_form	02304982
10717196	_hypernym	10299700
00933154	_also_see	02500884
00884946	_derivationally_related_form	07227772
10482220	_derivationally_related_form	00976653
07214994	_derivationally_related_form	00841986
12792638	_member_meronym	12793886
10206887	_derivationally_related_form	02390470
01640207	_hypernym	01617192
01716227	_derivationally_related_form	04995211
01566490	_hypernym	00388635
12950501	_hypernym	11579418
02408965	_derivationally_related_form	00044150
00913065	_also_see	00912048
00644066	_derivationally_related_form	05774129
07246582	_derivationally_related_form	00771961
00940842	_derivationally_related_form	01632411
03573282	_derivationally_related_form	00187526
02200686	_derivationally_related_form	01086081
00200397	_derivationally_related_form	10513120
13892897	_derivationally_related_form	02037090
09608002	_derivationally_related_form	02486932
00145218	_derivationally_related_form	01291069
00079018	_derivationally_related_form	02207206
00382635	_hypernym	00126264
02067689	_derivationally_related_form	00329227
06609503	_derivationally_related_form	01036804
10468559	_derivationally_related_form	00596807
09755398	_derivationally_related_form	08440630
07524760	_hypernym	07523905
00075021	_hypernym	00064889
00442063	_derivationally_related_form	04631700
00973056	_derivationally_related_form	06251781
01311103	_derivationally_related_form	10012989
01215902	_hypernym	00407535
00386715	_hypernym	00126264
02330247	_synset_domain_topic_of	00610738
02852173	_hypernym	03665366
08000304	_synset_domain_topic_of	06000644
00320486	_derivationally_related_form	02001461
11701903	_hypernym	11564258
00214951	_derivationally_related_form	00277376
02388950	_derivationally_related_form	10619492
00939857	_derivationally_related_form	07171206
02555434	_derivationally_related_form	05154908
01849746	_hypernym	01849221
00945853	_derivationally_related_form	06481320
01693727	_hypernym	01690294
00419289	_derivationally_related_form	14498096
09759069	_derivationally_related_form	02669885
00731222	_derivationally_related_form	00750532
00071178	_derivationally_related_form	04456276
01786402	_member_meronym	01786646
00064479	_derivationally_related_form	05160796
01078783	_derivationally_related_form	01169744
01501113	_derivationally_related_form	05718556
01602318	_derivationally_related_form	02152212
01151407	_derivationally_related_form	01765392
04632157	_derivationally_related_form	00193130
10517826	_derivationally_related_form	02511551
02600255	_hypernym	00010435
02608347	_derivationally_related_form	07325190
01945516	_derivationally_related_form	00313806
02537407	_derivationally_related_form	00749767
00757080	_derivationally_related_form	02565687
01235258	_hypernym	01234729
01212882	_hypernym	01212519
01540697	_hypernym	01507175
03146846	_hypernym	03322940
00654885	_derivationally_related_form	00082081
00005041	_hypernym	00001740
00715868	_also_see	02629390
00794981	_derivationally_related_form	01144355
02519148	_hypernym	02517442
12592351	_hypernym	11556857
00510189	_derivationally_related_form	02491383
04100174	_hypernym	03563967
01074694	_derivationally_related_form	01147060
01168961	_hypernym	01168569
02166460	_derivationally_related_form	00644503
02619924	_hypernym	01108148
10722385	_derivationally_related_form	02387034
00708538	_derivationally_related_form	05982152
00360932	_hypernym	00146138
01921204	_derivationally_related_form	10731848
02528380	_derivationally_related_form	07319652
04811995	_hypernym	04728786
11911591	_member_meronym	11921949
13754293	_derivationally_related_form	00153263
00958880	_also_see	02464693
01410223	_derivationally_related_form	04337740
01963942	_derivationally_related_form	09869171
03536568	_hypernym	04294426
01435380	_derivationally_related_form	06259898
10264437	_derivationally_related_form	06172789
01014990	_derivationally_related_form	00158804
02074092	_derivationally_related_form	14395018
00072012	_verb_group	00072586
03691128	_derivationally_related_form	01363648
00740712	_derivationally_related_form	00810729
04681387	_derivationally_related_form	01275762
01096497	_derivationally_related_form	00720565
08578706	_hypernym	08620061
05240211	_hypernym	08657249
00891936	_derivationally_related_form	06685456
02259829	_derivationally_related_form	07149836
09879744	_derivationally_related_form	02527651
00192613	_hypernym	00037396
07272545	_derivationally_related_form	01356750
00295697	_derivationally_related_form	03451473
02099829	_hypernym	01835496
02295208	_hypernym	02210855
02464693	_derivationally_related_form	05943066
12348127	_member_meronym	12348294
01328705	_derivationally_related_form	00371846
00751529	_derivationally_related_form	00835903
10042690	_hypernym	10617193
01806505	_derivationally_related_form	14407899
10005721	_hypernym	09777353
10241300	_derivationally_related_form	02419773
13934900	_hypernym	13927383
02541302	_also_see	01017738
02035919	_derivationally_related_form	13869327
10743675	_derivationally_related_form	00983824
06514093	_synset_domain_topic_of	06155567
01139194	_hypernym	01138670
01637982	_derivationally_related_form	07214432
10000007	_hypernym	00007846
02408281	_verb_group	01930874
00523513	_derivationally_related_form	01883716
00921014	_also_see	02131072
01021128	_derivationally_related_form	05820620
01993352	_derivationally_related_form	00733483
02833576	_derivationally_related_form	01884577
14363483	_hypernym	14299637
02203362	_derivationally_related_form	13244109
01239064	_derivationally_related_form	02375131
10011902	_derivationally_related_form	02587084
10387712	_hypernym	10120816
01162376	_hypernym	01160342
12575089	_hypernym	11585340
00364479	_derivationally_related_form	04631298
07518663	_hypernym	07518261
00457998	_derivationally_related_form	14456435
04629604	_derivationally_related_form	01257612
02274482	_derivationally_related_form	01145015
13810323	_hypernym	13809207
01112584	_hypernym	01112364
01172441	_hypernym	01170962
01673668	_member_meronym	01689226
01211699	_hypernym	01210737
00150287	_derivationally_related_form	07369604
00795008	_derivationally_related_form	02659763
02229867	_hypernym	01762525
00278403	_hypernym	00277376
02675067	_derivationally_related_form	00549472
01236795	_derivationally_related_form	07389569
00420477	_synset_domain_topic_of	05946687
11555413	_hypernym	08107499
02304982	_hypernym	02281093
01704452	_derivationally_related_form	10794014
01848355	_derivationally_related_form	04817923
00168910	_derivationally_related_form	01047338
01002740	_derivationally_related_form	00907919
02663340	_derivationally_related_form	06650431
03511426	_hypernym	08511241
02466670	_derivationally_related_form	01125693
01602353	_hypernym	01504437
10298912	_derivationally_related_form	02447001
00786458	_derivationally_related_form	01006675
02333225	_derivationally_related_form	14452294
01573483	_member_meronym	01573627
01889129	_derivationally_related_form	14004572
03490884	_derivationally_related_form	01481360
01350971	_derivationally_related_form	07351031
01236164	_derivationally_related_form	00125629
01684663	_derivationally_related_form	03875218
14289590	_derivationally_related_form	00373766
00932636	_derivationally_related_form	05920791
02261883	_member_meronym	02262324
08223263	_derivationally_related_form	02346895
06734467	_synset_domain_topic_of	08441203
08651247	_derivationally_related_form	02333689
01214746	_derivationally_related_form	00858781
01524885	_member_meronym	01556671
01813499	_derivationally_related_form	07527352
15236475	_hypernym	15113229
00567044	_derivationally_related_form	01509584
02742232	_derivationally_related_form	03242713
08009834	_hypernym	08008335
07447022	_hypernym	07351612
01279631	_derivationally_related_form	13537894
12543455	_hypernym	12542910
02188065	_member_meronym	02195403
02507736	_derivationally_related_form	14446878
10201535	_derivationally_related_form	01721754
07330828	_derivationally_related_form	00470701
00695300	_hypernym	00694990
06807198	_derivationally_related_form	00948853
13869327	_derivationally_related_form	02033137
01790020	_hypernym	01759326
02565728	_member_meronym	02567960
13085864	_derivationally_related_form	01741446
00641252	_hypernym	00637259
00204585	_derivationally_related_form	00068333
00097504	_derivationally_related_form	01712704
05978812	_derivationally_related_form	02910789
02272549	_derivationally_related_form	00088481
05768415	_derivationally_related_form	01635432
10402285	_derivationally_related_form	00397953
00661213	_derivationally_related_form	05748786
01462005	_derivationally_related_form	09786922
00167278	_synset_domain_topic_of	00503237
07233214	_hypernym	07232988
01378556	_derivationally_related_form	07445896
00613973	_derivationally_related_form	10705615
00932798	_derivationally_related_form	07173959
00249501	_hypernym	00250259
06761099	_hypernym	06758225
02255268	_derivationally_related_form	01086572
02338386	_hypernym	02327200
13548105	_derivationally_related_form	00474762
00367685	_hypernym	00467451
07356676	_derivationally_related_form	00153263
00510189	_hypernym	00509846
12779437	_hypernym	11567411
04576971	_hypernym	03736970
00599329	_derivationally_related_form	10325243
00101779	_derivationally_related_form	10776339
12322887	_member_meronym	12346179
02697950	_derivationally_related_form	05849284
02632567	_derivationally_related_form	10766025
06743362	_hypernym	06738281
00508192	_also_see	00561036
03921209	_has_part	03247620
01096497	_derivationally_related_form	10372373
02018524	_hypernym	02016523
01564144	_derivationally_related_form	14562324
09821253	_derivationally_related_form	00862683
00945853	_derivationally_related_form	01011166
00065791	_derivationally_related_form	00796315
02508078	_derivationally_related_form	14440137
01845720	_derivationally_related_form	00295701
00332445	_derivationally_related_form	14997012
10044879	_derivationally_related_form	00592102
02305929	_hypernym	02305407
12501745	_member_meronym	12520661
00248368	_derivationally_related_form	02191766
12213635	_member_meronym	12216382
05117660	_derivationally_related_form	01531375
00796315	_derivationally_related_form	02545272
00826509	_derivationally_related_form	06374587
00744758	_hypernym	00732746
01679433	_derivationally_related_form	04484160
12329899	_member_meronym	12330751
00218045	_derivationally_related_form	01656458
00301187	_derivationally_related_form	00926472
00211110	_derivationally_related_form	00484166
15224293	_derivationally_related_form	00235368
02495922	_also_see	00931555
14458593	_derivationally_related_form	00865958
00980453	_hypernym	00943837
02194078	_hypernym	01762525
02910789	_derivationally_related_form	05978812
06634376	_derivationally_related_form	00831651
01930117	_derivationally_related_form	00307631
02320374	_derivationally_related_form	13306870
07996689	_hypernym	07951464
13523661	_derivationally_related_form	03002351
04821451	_hypernym	04820258
10178216	_hypernym	10335931
01112584	_derivationally_related_form	07197021
00596807	_derivationally_related_form	10468559
02576349	_derivationally_related_form	10100761
01631830	_derivationally_related_form	00894738
11981314	_hypernym	11579418
07488340	_hypernym	07487955
02539788	_derivationally_related_form	04922113
00233335	_derivationally_related_form	08512259
01774426	_derivationally_related_form	09756961
01467370	_derivationally_related_form	08512736
01275762	_derivationally_related_form	13905405
06741305	_hypernym	06740644
01663169	_hypernym	01656813
02130524	_also_see	00877083
02198021	_hypernym	01762525
00025034	_derivationally_related_form	00255710
00240938	_hypernym	00235435
01105639	_hypernym	01101913
00343334	_derivationally_related_form	07342049
01430111	_also_see	01943406
02372326	_derivationally_related_form	00040152
00794079	_derivationally_related_form	09184975
05367341	_hypernym	05418717
00419644	_hypernym	00418025
14563564	_derivationally_related_form	02513740
02883344	_hypernym	03094503
01771535	_derivationally_related_form	07285403
04316646	_has_part	04226322
02080934	_hypernym	01864707
00043195	_derivationally_related_form	02285629
01447632	_derivationally_related_form	00112312
01229976	_derivationally_related_form	04007664
01659248	_derivationally_related_form	00925207
01014821	_derivationally_related_form	06736405
02034986	_derivationally_related_form	14213328
01439190	_also_see	01998793
11728350	_member_meronym	11728530
09821253	_derivationally_related_form	01119169
05650820	_derivationally_related_form	00963570
02523953	_derivationally_related_form	00065575
01529036	_member_meronym	01532107
01216004	_hypernym	01216670
00570590	_derivationally_related_form	05675130
12581381	_member_meronym	12584559
00435492	_derivationally_related_form	05683582
00410247	_derivationally_related_form	02561332
01711071	_also_see	01160031
10707804	_derivationally_related_form	02321757
01537409	_derivationally_related_form	05244934
07473441	_hypernym	07319103
03250588	_derivationally_related_form	01386433
02458747	_derivationally_related_form	05800998
00338071	_derivationally_related_form	09285254
01765392	_derivationally_related_form	13969700
00647542	_derivationally_related_form	06710546
00614057	_hypernym	00613683
07508232	_derivationally_related_form	01790020
00668099	_verb_group	01794668
00672277	_derivationally_related_form	00874067
00316768	_hypernym	00429060
01871979	_derivationally_related_form	00112312
03624134	_has_part	13902482
01180701	_derivationally_related_form	15101854
07452841	_derivationally_related_form	00611481
11820323	_member_meronym	11820463
00990249	_hypernym	00989201
01591490	_member_meronym	01591697
01481360	_hypernym	01340439
02531625	_derivationally_related_form	10068234
02323286	_hypernym	02327200
00623151	_derivationally_related_form	05766247
00826509	_derivationally_related_form	06710546
10623354	_derivationally_related_form	00782057
00884011	_derivationally_related_form	10482054
02441022	_derivationally_related_form	05196375
00359614	_hypernym	00359238
10757193	_hypernym	09629752
10487182	_derivationally_related_form	01321002
01041111	_hypernym	01206153
05186306	_derivationally_related_form	10672908
03916470	_derivationally_related_form	02126382
09411430	_has_part	09274500
00213694	_derivationally_related_form	02303331
00807461	_derivationally_related_form	01177033
00290579	_derivationally_related_form	02521816
05832745	_derivationally_related_form	00750532
01621555	_derivationally_related_form	10284064
05715283	_derivationally_related_form	02191546
02461723	_also_see	01116380
02077656	_also_see	01981036
01158872	_derivationally_related_form	05148699
01579410	_hypernym	01578575
00394813	_derivationally_related_form	00380083
00237511	_hypernym	00146138
02712243	_derivationally_related_form	00410247
04617562	_has_part	04616059
01252425	_derivationally_related_form	04694441
07157273	_member_of_domain_usage	09863339
13769317	_derivationally_related_form	01312371
01882170	_derivationally_related_form	04544979
07252378	_derivationally_related_form	00765649
02588099	_also_see	02037272
00061290	_derivationally_related_form	01955127
01012360	_derivationally_related_form	00656576
03270165	_has_part	07262704
01735308	_derivationally_related_form	03257586
02717102	_derivationally_related_form	00318735
07988857	_hypernym	07970406
12581381	_member_meronym	12594746
02171039	_hypernym	00722232
03318438	_derivationally_related_form	01654271
00503982	_also_see	00889831
14289590	_hypernym	14285662
00048129	_derivationally_related_form	02679788
14889479	_hypernym	14865800
01898282	_derivationally_related_form	01935395
00425090	_derivationally_related_form	02567519
12582231	_hypernym	13104059
01571578	_member_meronym	01572174
00017222	_hypernym	00004475
00293916	_hypernym	00283127
03133538	_hypernym	04381994
10195261	_derivationally_related_form	00020671
01556671	_member_meronym	01557185
04692157	_derivationally_related_form	00263044
10214062	_hypernym	10213652
07523286	_hypernym	07522729
01315333	_hypernym	01315613
04944048	_hypernym	04942869
02542795	_derivationally_related_form	04906273
13285714	_derivationally_related_form	00081072
00830761	_derivationally_related_form	10252547
00591622	_hypernym	00586262
04687333	_derivationally_related_form	02376277
01524885	_member_meronym	01598432
01755627	_also_see	02291843
01087197	_derivationally_related_form	03420559
07199565	_derivationally_related_form	00815686
01539063	_derivationally_related_form	10034201
05257737	_derivationally_related_form	01223616
00451370	_hypernym	00523513
09605289	_derivationally_related_form	14425103
01433294	_hypernym	01435380
02419773	_derivationally_related_form	10700105
01762528	_hypernym	01770501
01931768	_derivationally_related_form	01144876
01765908	_derivationally_related_form	05832264
01452918	_derivationally_related_form	00115500
03544360	_has_part	03984381
02296153	_verb_group	02235842
10008716	_derivationally_related_form	01619929
02397637	_hypernym	02391803
02291024	_member_meronym	02291220
01051331	_derivationally_related_form	01496630
10383237	_derivationally_related_form	01463963
05008943	_derivationally_related_form	01477806
02449847	_verb_group	02236624
01606205	_derivationally_related_form	03386011
02290998	_also_see	00583239
00617748	_derivationally_related_form	04802629
00205349	_derivationally_related_form	02237338
03489162	_has_part	03485997
05780885	_hypernym	05774614
00361192	_derivationally_related_form	02215001
02806261	_derivationally_related_form	02679530
00543233	_synset_domain_topic_of	07020895
12501745	_member_meronym	12520223
02038357	_derivationally_related_form	05069199
05603160	_hypernym	05601758
12667179	_member_meronym	12667406
01385170	_derivationally_related_form	07373803
09437454	_hypernym	09287968
00270215	_hypernym	01380638
05827684	_hypernym	05816287
01039330	_hypernym	00740577
07439570	_derivationally_related_form	00454868
04713428	_derivationally_related_form	02657219
01138911	_hypernym	01138523
02108377	_hypernym	00109660
05216365	_has_part	05329215
02329883	_hypernym	02339413
00616857	_derivationally_related_form	05706629
00704690	_derivationally_related_form	01144133
01121690	_derivationally_related_form	02284951
02260362	_derivationally_related_form	01091905
01772960	_derivationally_related_form	14037011
01280958	_derivationally_related_form	03127024
00406612	_derivationally_related_form	00564695
07185325	_hypernym	07160883
10691600	_hypernym	00007846
02385634	_derivationally_related_form	00586262
07447022	_derivationally_related_form	00387310
05194874	_derivationally_related_form	01821132
00086297	_synset_domain_topic_of	08441203
00766234	_synset_domain_topic_of	06539178
07546465	_hypernym	07480068
13812607	_hypernym	00031921
13929588	_derivationally_related_form	09945905
13712428	_hypernym	13603305
00931467	_derivationally_related_form	05922949
00280853	_hypernym	00279835
08049401	_derivationally_related_form	02470175
05685538	_hypernym	05685363
03623556	_has_part	02848216
11972569	_hypernym	11579418
01980328	_hypernym	01759182
02595662	_derivationally_related_form	01964367
02050132	_also_see	01912159
01131043	_also_see	01549291
05922949	_hypernym	05919866
10009276	_hypernym	10448983
01686132	_derivationally_related_form	10212780
00208497	_hypernym	00208836
00357275	_derivationally_related_form	01592456
09622049	_hypernym	00007846
02543181	_derivationally_related_form	01179707
04704346	_hypernym	04703424
07168623	_derivationally_related_form	00747135
00250181	_derivationally_related_form	13512238
01129532	_derivationally_related_form	02539788
02465693	_derivationally_related_form	02123424
02845576	_hypernym	08566028
01027859	_has_part	00541479
01467370	_hypernym	01205696
00162632	_derivationally_related_form	00699815
00194969	_derivationally_related_form	02661252
04717139	_derivationally_related_form	02679012
01591621	_derivationally_related_form	06793426
10578762	_derivationally_related_form	01437254
07409592	_derivationally_related_form	01206218
10596689	_derivationally_related_form	00310201
00544549	_hypernym	00126264
00238867	_derivationally_related_form	13530408
01563005	_derivationally_related_form	09429387
00877083	_derivationally_related_form	01264050
04828255	_derivationally_related_form	01782519
09779790	_hypernym	10078806
02519991	_also_see	02672540
02559180	_also_see	01611067
01933900	_derivationally_related_form	02947212
00493460	_also_see	02109678
06212839	_derivationally_related_form	10197392
01144657	_derivationally_related_form	00622584
10631941	_hypernym	09617867
00861929	_derivationally_related_form	06691684
03633091	_has_part	03485997
04263760	_hypernym	03183080
05808218	_hypernym	05807306
03318438	_derivationally_related_form	00838043
02329733	_verb_group	02329578
00321956	_hypernym	00320852
11977125	_hypernym	11579418
04337974	_derivationally_related_form	01517662
01001689	_also_see	01865197
06740919	_derivationally_related_form	00894738
13467916	_hypernym	13518963
05611302	_hypernym	00023271
01186208	_verb_group	01185981
01929467	_derivationally_related_form	07398659
00596807	_derivationally_related_form	02984104
12265900	_member_meronym	12266217
10197525	_hypernym	10599354
09848489	_derivationally_related_form	00683280
01769789	_member_meronym	01769930
00732552	_derivationally_related_form	01002956
02506555	_also_see	02064745
02008066	_derivationally_related_form	13653902
03283827	_derivationally_related_form	02767308
02700455	_hypernym	02700104
01628449	_derivationally_related_form	07323922
12090702	_hypernym	11567411
05237755	_hypernym	09257949
02272549	_derivationally_related_form	09802641
09868270	_hypernym	09855630
00841986	_derivationally_related_form	10091012
15183428	_hypernym	15157225
01431230	_derivationally_related_form	00854393
10174695	_derivationally_related_form	08891595
06601327	_derivationally_related_form	00932324
00508032	_also_see	00234725
12212810	_member_meronym	12322887
05714161	_derivationally_related_form	02125641
12090318	_hypernym	11562747
10644469	_derivationally_related_form	01503404
00006484	_has_part	05432948
00153263	_derivationally_related_form	00363260
08069878	_hypernym	08419984
00525446	_derivationally_related_form	01030820
11989636	_member_meronym	11989869
01996735	_derivationally_related_form	00290579
07370125	_derivationally_related_form	02016523
01680137	_hypernym	01657723
14535431	_derivationally_related_form	00215800
12821505	_hypernym	12205694
00763901	_also_see	01222360
00929718	_derivationally_related_form	01698271
12591897	_member_meronym	12592058
02288473	_member_meronym	02290521
11911591	_member_meronym	11964688
02958343	_has_part	03530910
03932670	_hypernym	03309808
01844431	_derivationally_related_form	01066542
04293119	_derivationally_related_form	01593937
05785885	_hypernym	05785508
00399393	_derivationally_related_form	00996102
13969243	_derivationally_related_form	00482473
01336587	_also_see	00439588
10019406	_derivationally_related_form	01977080
00684480	_also_see	00655779
01190948	_derivationally_related_form	07491038
09943541	_synset_domain_topic_of	08199025
00672433	_also_see	00673766
11512650	_hypernym	11512818
15268094	_hypernym	15113229
12892226	_member_meronym	12907287
02079170	_member_meronym	02080586
02539788	_derivationally_related_form	13813765
12581381	_member_meronym	12588156
04693900	_hypernym	04692157
01629000	_derivationally_related_form	00922144
00253270	_derivationally_related_form	00475183
05085572	_derivationally_related_form	00444519
08008335	_derivationally_related_form	02448185
07885223	_hypernym	07578363
04051549	_derivationally_related_form	02334595
05984936	_derivationally_related_form	00159880
03365592	_hypernym	03536348
00935940	_derivationally_related_form	10029269
04361095	_hypernym	04341686
00854420	_hypernym	00834009
01283746	_derivationally_related_form	08008017
13537894	_derivationally_related_form	01551195
00131018	_derivationally_related_form	08626080
01790020	_derivationally_related_form	14403282
01479333	_derivationally_related_form	02853449
02490877	_derivationally_related_form	07450651
01705257	_derivationally_related_form	07180570
01150370	_derivationally_related_form	10773394
01576506	_member_meronym	01576695
00043195	_derivationally_related_form	00721437
00787218	_derivationally_related_form	02530167
06709998	_derivationally_related_form	00823669
00366275	_hypernym	00140123
02281093	_derivationally_related_form	13367070
11714618	_member_meronym	11715207
02169891	_hypernym	02106506
01448100	_verb_group	02103162
07411160	_hypernym	07351612
06556692	_hypernym	06552984
01259005	_derivationally_related_form	04692908
04007894	_derivationally_related_form	01621555
02660147	_hypernym	02659763
00252990	_hypernym	00252019
01270199	_verb_group	01535246
01586541	_member_meronym	01587713
05683582	_derivationally_related_form	00621734
04858785	_derivationally_related_form	02545045
00143885	_hypernym	00635850
00243918	_derivationally_related_form	01665638
02441022	_derivationally_related_form	09941571
00403783	_hypernym	00403092
03777283	_derivationally_related_form	01743784
03579538	_hypernym	03221720
01743784	_derivationally_related_form	03777283
01524885	_member_meronym	01526635
10690849	_hypernym	10716005
12514324	_hypernym	11585340
14619225	_derivationally_related_form	00330144
02015598	_derivationally_related_form	03303965
00144445	_derivationally_related_form	02120140
07520112	_derivationally_related_form	01888946
05264247	_hypernym	05264081
03287178	_derivationally_related_form	01622795
10216106	_derivationally_related_form	02271137
00285557	_derivationally_related_form	01928838
02645007	_derivationally_related_form	04353803
01891249	_hypernym	01831531
10126177	_derivationally_related_form	01627355
00947128	_derivationally_related_form	01165043
10391653	_derivationally_related_form	01684663
02034828	_also_see	01129977
03600977	_hypernym	03605915
05921123	_derivationally_related_form	02378183
00159880	_derivationally_related_form	01128984
02739861	_derivationally_related_form	14500567
01015244	_derivationally_related_form	10703905
12501745	_member_meronym	12512947
08890097	_has_part	08954057
05774129	_derivationally_related_form	00636574
05610008	_hypernym	05249636
07311115	_derivationally_related_form	01841079
02279442	_hypernym	01759182
01038666	_derivationally_related_form	07134850
00229026	_verb_group	00229280
12660796	_hypernym	11579418
06286395	_derivationally_related_form	00980453
02154508	_derivationally_related_form	05818741
09632274	_hypernym	00007846
05919866	_hypernym	05833840
14449405	_derivationally_related_form	01188725
02846322	_derivationally_related_form	07561112
02646931	_derivationally_related_form	14441825
00262792	_also_see	01989669
01452255	_hypernym	01449974
02544348	_derivationally_related_form	00802238
07832902	_hypernym	07829412
08436759	_derivationally_related_form	02598211
02393401	_derivationally_related_form	04818284
00737973	_derivationally_related_form	01619929
00182406	_derivationally_related_form	00363788
00620532	_derivationally_related_form	14500567
10523519	_derivationally_related_form	02650552
00414179	_hypernym	00413239
13550318	_hypernym	13526110
07333649	_derivationally_related_form	02014165
10090498	_derivationally_related_form	02154508
05051896	_derivationally_related_form	00118523
01003729	_derivationally_related_form	00658052
00033615	_derivationally_related_form	00681429
00730499	_derivationally_related_form	05748786
00345761	_derivationally_related_form	10355449
02701210	_derivationally_related_form	02964634
10593115	_derivationally_related_form	01137138
02368336	_also_see	02395115
01152670	_verb_group	01152214
10503452	_hypernym	00007846
01588493	_derivationally_related_form	07270179
11911591	_member_meronym	11980577
05003590	_derivationally_related_form	02748927
00937208	_derivationally_related_form	10206173
12344996	_member_meronym	12345136
00783042	_derivationally_related_form	05695232
10298647	_hypernym	10054657
01524885	_member_meronym	01529036
02516594	_derivationally_related_form	09758643
01158872	_derivationally_related_form	00947128
05714161	_derivationally_related_form	02125223
07186661	_hypernym	07186148
00644066	_derivationally_related_form	10687231
10437852	_synset_domain_topic_of	08441203
11911591	_member_meronym	11970429
12660009	_member_meronym	12667179
11822557	_member_meronym	11822849
07251984	_hypernym	06691442
01054335	_derivationally_related_form	10700201
06740183	_derivationally_related_form	00896141
10012484	_derivationally_related_form	01070187
01562584	_member_meronym	01564630
08111419	_synset_domain_topic_of	06037666
00158185	_derivationally_related_form	02600490
13594585	_hypernym	13582013
00190115	_also_see	02102484
02091885	_derivationally_related_form	00285557
01719921	_verb_group	02744977
01704953	_hypernym	01698271
10516692	_hypernym	00007846
02428924	_hypernym	02376958
02460199	_derivationally_related_form	10520804
01195867	_hypernym	01184814
04694441	_derivationally_related_form	01531998
06539770	_derivationally_related_form	00747135
12776946	_hypernym	11562747
00139908	_derivationally_related_form	07884567
00869596	_derivationally_related_form	09612291
01835496	_derivationally_related_form	10335931
00636461	_derivationally_related_form	02531625
10431330	_hypernym	09917593
07284554	_hypernym	07283608
12318164	_member_meronym	12318378
12213485	_hypernym	11534677
00608502	_derivationally_related_form	01374582
01346978	_verb_group	01345109
10000007	_derivationally_related_form	00074038
06749729	_derivationally_related_form	10312287
01753596	_hypernym	01640207
05238282	_has_part	05243879
02199712	_member_meronym	02199999
01572174	_member_meronym	01572328
01776546	_hypernym	01759182
02986348	_hypernym	02965300
02049190	_derivationally_related_form	00342755
00205349	_derivationally_related_form	00796976
01170052	_derivationally_related_form	07881800
10724699	_derivationally_related_form	02012344
02203362	_derivationally_related_form	10529231
05166805	_derivationally_related_form	01817500
00417397	_hypernym	00812526
10709529	_hypernym	00007846
10335801	_derivationally_related_form	00941990
09949946	_hypernym	10475297
04880573	_hypernym	04723816
05564590	_has_part	05576194
00804002	_derivationally_related_form	13416345
11911591	_member_meronym	11962500
09999135	_hypernym	10009671
03234306	_derivationally_related_form	01582645
01800422	_derivationally_related_form	06716796
01485158	_derivationally_related_form	08008017
00823436	_hypernym	00804802
01950798	_derivationally_related_form	10590339
01058574	_derivationally_related_form	06762711
00363493	_derivationally_related_form	15271008
00027167	_derivationally_related_form	02333689
10541229	_derivationally_related_form	00599234
02062212	_derivationally_related_form	00105479
01635432	_derivationally_related_form	05936381
10210648	_hypernym	10631941
01793177	_derivationally_related_form	01224031
00745637	_derivationally_related_form	02513740
02208903	_also_see	02209499
09622745	_hypernym	10024362
04623612	_hypernym	04623113
14413644	_hypernym	13937554
01604696	_hypernym	01340439
06759349	_hypernym	06758225
00519056	_derivationally_related_form	09229709
01054335	_derivationally_related_form	02648639
06495328	_hypernym	06481320
03386011	_hypernym	03171356
03313602	_hypernym	03398467
01283208	_hypernym	01332730
01221611	_hypernym	01220984
02551144	_hypernym	02551832
05708432	_derivationally_related_form	00591519
00555648	_derivationally_related_form	02055649
02430580	_derivationally_related_form	14416845
06183899	_hypernym	05661996
00595146	_derivationally_related_form	10298647
00668805	_hypernym	00668099
07507098	_hypernym	07506569
03242713	_derivationally_related_form	01930117
11971783	_hypernym	11669921
07372959	_hypernym	07305234
00170156	_derivationally_related_form	04781349
14292090	_derivationally_related_form	00108303
02037472	_hypernym	02037090
10036266	_hypernym	00007846
00114871	_derivationally_related_form	01453433
01201574	_derivationally_related_form	07579399
01952898	_derivationally_related_form	01264050
08656590	_synset_domain_topic_of	08191701
04645943	_derivationally_related_form	02640440
02970408	_hypernym	02773037
02107588	_derivationally_related_form	06750154
07538965	_derivationally_related_form	00589624
00330457	_derivationally_related_form	00438178
05832264	_hypernym	05829480
05216365	_has_part	05462057
01032368	_hypernym	01032040
01643464	_derivationally_related_form	00935940
01637633	_also_see	01634142
01198307	_hypernym	01181902
00952182	_derivationally_related_form	10743675
11849271	_has_part	11849467
10047459	_derivationally_related_form	07508806
00512877	_hypernym	00126264
00344040	_derivationally_related_form	01346978
06740919	_derivationally_related_form	01631830
02372605	_hypernym	02367363
12096395	_hypernym	13121544
09930464	_derivationally_related_form	02426395
15267536	_derivationally_related_form	00484166
09851165	_hypernym	00007846
02234087	_derivationally_related_form	01083645
00044149	_derivationally_related_form	02756098
00378664	_verb_group	00378042
02743547	_derivationally_related_form	02991122
00713818	_hypernym	00713167
00846509	_derivationally_related_form	06719579
01066163	_derivationally_related_form	00459776
00336260	_hypernym	00109660
00759694	_derivationally_related_form	10702781
00042541	_derivationally_related_form	00056930
02382087	_derivationally_related_form	01033458
00644503	_derivationally_related_form	02166460
01619929	_derivationally_related_form	10008716
13285714	_hypernym	13285176
10435988	_hypernym	09835506
01206153	_hypernym	01202904
12392385	_hypernym	11567411
13783038	_synset_domain_topic_of	06163751
02583545	_derivationally_related_form	09833997
00719231	_derivationally_related_form	14412725
00908133	_derivationally_related_form	01002740
01591835	_derivationally_related_form	06793426
00457770	_hypernym	00146138
14386590	_hypernym	14083790
10339966	_derivationally_related_form	05718935
00574218	_synset_domain_topic_of	06037666
01849288	_also_see	02393401
07439570	_derivationally_related_form	02068413
05704266	_derivationally_related_form	00722232
14414715	_derivationally_related_form	00494269
01150981	_derivationally_related_form	09769345
00643250	_also_see	01686439
02384940	_derivationally_related_form	07186661
01205696	_derivationally_related_form	14419510
02610628	_hypernym	02609764
02739861	_derivationally_related_form	05953416
08183398	_derivationally_related_form	01524298
13151820	_hypernym	11567411
10498046	_derivationally_related_form	01888511
07409592	_hypernym	07339329
00047945	_derivationally_related_form	03419014
05790572	_hypernym	05788149
11732052	_hypernym	12205694
10100761	_derivationally_related_form	02576349
00248026	_derivationally_related_form	13489037
00378361	_verb_group	00378042
05178715	_hypernym	05174653
10557854	_derivationally_related_form	00604694
13149039	_member_meronym	13149296
01362736	_hypernym	01264283
05289297	_hypernym	05289601
12770068	_hypernym	11562747
12280886	_member_meronym	12283542
00467717	_derivationally_related_form	13373214
01740608	_derivationally_related_form	03146846
01860107	_derivationally_related_form	00945205
06505517	_synset_domain_topic_of	08441203
11692952	_member_meronym	11714618
07417043	_derivationally_related_form	02487718
00721437	_verb_group	01637982
00388065	_hypernym	00387657
08463647	_derivationally_related_form	01031256
13140535	_hypernym	11534677
07990377	_synset_domain_topic_of	06070929
00285557	_derivationally_related_form	02091689
00035189	_derivationally_related_form	01640855
05074374	_derivationally_related_form	01030022
10409011	_derivationally_related_form	02317970
10245639	_hypernym	10180178
01224744	_derivationally_related_form	00830448
00874806	_hypernym	00874067
00796047	_derivationally_related_form	07006119
00258857	_hypernym	00126264
05803379	_hypernym	05802185
01711965	_derivationally_related_form	06262567
01816431	_derivationally_related_form	13986679
00845909	_hypernym	00826509
03110322	_derivationally_related_form	00002325
01073995	_hypernym	00030358
00261972	_derivationally_related_form	00532886
00948071	_derivationally_related_form	00634586
02513740	_also_see	01782519
00908909	_hypernym	00908492
00956131	_derivationally_related_form	04850117
09931640	_derivationally_related_form	01804414
00355955	_derivationally_related_form	13467916
00002573	_verb_group	00001740
00854000	_derivationally_related_form	01425511
05202497	_derivationally_related_form	00306314
01621555	_derivationally_related_form	10292316
12505032	_hypernym	11585340
02537407	_derivationally_related_form	10206173
02504562	_derivationally_related_form	10461424
00658052	_derivationally_related_form	01009871
00896803	_derivationally_related_form	01241767
05238282	_derivationally_related_form	01309478
01997862	_derivationally_related_form	09993252
01914947	_hypernym	02050132
07367812	_hypernym	07283608
05715150	_hypernym	05714894
13580723	_derivationally_related_form	01193721
12317763	_member_meronym	12317919
04446521	_hypernym	03969259
05808218	_derivationally_related_form	01637982
01601234	_verb_group	01432601
07155081	_hypernym	07109196
00229026	_verb_group	00475183
01925338	_hypernym	01904930
01113068	_derivationally_related_form	02260362
05896059	_derivationally_related_form	01635432
02331262	_also_see	01865197
11719468	_member_meronym	11732309
00633864	_derivationally_related_form	00789138
10140783	_derivationally_related_form	00658052
01441510	_hypernym	01227675
13774404	_derivationally_related_form	00453424
10162991	_hypernym	09623038
03491178	_derivationally_related_form	01481360
01012712	_hypernym	01012360
07453195	_derivationally_related_form	02384275
11988774	_hypernym	11579418
03141702	_hypernym	03183080
02033295	_derivationally_related_form	13867641
04937043	_hypernym	04936846
00235918	_derivationally_related_form	13582013
00344259	_hypernym	00331950
01767163	_verb_group	01765908
03623556	_has_part	03974215
13855828	_hypernym	13854649
01230350	_derivationally_related_form	01173965
02573127	_hypernym	02574516
02743727	_derivationally_related_form	00329227
06783768	_hypernym	06599788
02742232	_derivationally_related_form	00307631
14317720	_derivationally_related_form	00256507
00420712	_derivationally_related_form	02424128
01698271	_verb_group	01744611
01612295	_hypernym	01494310
01560636	_hypernym	01557185
05108947	_derivationally_related_form	00153263
00548173	_derivationally_related_form	01096497
00876665	_derivationally_related_form	09953965
00890100	_derivationally_related_form	10760763
12303349	_hypernym	11567411
07545415	_hypernym	07544647
09280380	_hypernym	09274500
00938247	_hypernym	00939277
05650329	_hypernym	05616246
03398467	_hypernym	04213626
07521674	_derivationally_related_form	01782432
01206553	_derivationally_related_form	00887463
07246582	_derivationally_related_form	00930806
02345048	_derivationally_related_form	13262663
00067274	_hypernym	00066191
00915722	_derivationally_related_form	01741446
01097960	_derivationally_related_form	01230283
03209910	_derivationally_related_form	03706653
01537409	_derivationally_related_form	00072261
00918580	_derivationally_related_form	00506658
00091311	_also_see	00804695
01567275	_derivationally_related_form	01052853
02170427	_hypernym	02169891
07495327	_derivationally_related_form	00065070
01640550	_derivationally_related_form	09972157
00307631	_derivationally_related_form	02742232
01600657	_hypernym	01525720
14445226	_derivationally_related_form	00388635
00246217	_derivationally_related_form	00803394
14854262	_derivationally_related_form	03065685
01674717	_hypernym	01673891
02496498	_hypernym	02497062
12949955	_member_meronym	12950126
02327200	_derivationally_related_form	01057200
04815321	_derivationally_related_form	00851103
00838524	_verb_group	00838043
03397532	_derivationally_related_form	01387301
01156115	_hypernym	01155687
11445564	_derivationally_related_form	00009492
01797051	_derivationally_related_form	10335246
04472726	_has_part	02715229
01753788	_derivationally_related_form	00237869
11726925	_member_meronym	11727091
00137313	_hypernym	00126264
01430952	_hypernym	02116118
02283324	_hypernym	02202384
01478002	_hypernym	01476483
00483181	_derivationally_related_form	13969243
05634219	_derivationally_related_form	01635056
12505563	_hypernym	11585340
02169352	_derivationally_related_form	00879759
14050143	_derivationally_related_form	00022686
08560952	_derivationally_related_form	02150948
07354731	_derivationally_related_form	01111028
01640207	_derivationally_related_form	07328942
14285662	_derivationally_related_form	00090186
02150510	_derivationally_related_form	10633450
02461314	_verb_group	02462580
00394813	_derivationally_related_form	07882497
05219561	_hypernym	05217168
01930117	_hypernym	01835496
02151966	_derivationally_related_form	03688943
01894649	_hypernym	01831531
01640855	_derivationally_related_form	03017922
10307234	_hypernym	09816771
02743020	_hypernym	02604760
00922144	_derivationally_related_form	01628197
02258617	_derivationally_related_form	07443761
07238694	_has_part	06396930
00553823	_hypernym	00333829
00486018	_derivationally_related_form	01127379
14451349	_hypernym	14451020
08672562	_derivationally_related_form	00413876
07123012	_derivationally_related_form	01048939
05816287	_hypernym	00023271
09442838	_derivationally_related_form	02801349
01946408	_synset_domain_topic_of	02858304
00274283	_derivationally_related_form	13552270
05547508	_has_part	05301072
01572510	_hypernym	01557774
04782878	_derivationally_related_form	00644839
12751402	_hypernym	11562747
01231652	_hypernym	00069879
06783598	_derivationally_related_form	00672433
00272448	_derivationally_related_form	02579447
10280674	_hypernym	10415638
08160276	_hypernym	00031264
00351963	_hypernym	00352826
12280886	_member_meronym	12282737
00277569	_derivationally_related_form	01976220
01321456	_derivationally_related_form	14425103
01424456	_derivationally_related_form	10191001
01789514	_derivationally_related_form	10209246
12391477	_member_meronym	12396255
11754188	_member_meronym	11761007
14332085	_derivationally_related_form	02123424
02492198	_derivationally_related_form	00429048
00348008	_derivationally_related_form	01924882
04756887	_derivationally_related_form	00337404
00646738	_derivationally_related_form	10680609
00276601	_derivationally_related_form	04904996
02607455	_derivationally_related_form	09559201
02947212	_derivationally_related_form	02336015
01329141	_derivationally_related_form	02713594
00428270	_derivationally_related_form	01965464
02834778	_has_part	03796605
00327683	_derivationally_related_form	01973125
09641226	_hypernym	10453357
10757193	_derivationally_related_form	02619424
09862345	_derivationally_related_form	02656763
01048912	_derivationally_related_form	02146790
15237567	_derivationally_related_form	02677332
11841529	_member_meronym	11842204
13354985	_has_part	13408980
12740196	_member_meronym	12750306
03526198	_hypernym	03848729
02003725	_derivationally_related_form	00233335
05762998	_hypernym	05760202
07379223	_derivationally_related_form	01893771
01092366	_derivationally_related_form	09939313
01086103	_derivationally_related_form	07458453
15271008	_derivationally_related_form	02535716
01995549	_verb_group	02679899
10277912	_derivationally_related_form	07051975
01904930	_derivationally_related_form	10412055
01217780	_derivationally_related_form	13907415
02518178	_member_meronym	02518324
06651577	_derivationally_related_form	02439732
06353934	_derivationally_related_form	00994076
07272172	_derivationally_related_form	01029852
05684440	_derivationally_related_form	01764171
02670186	_derivationally_related_form	00439343
01163620	_derivationally_related_form	03768346
02263788	_derivationally_related_form	13774404
11717820	_member_meronym	11718096
02234087	_derivationally_related_form	00164579
00017222	_derivationally_related_form	01567275
01631072	_derivationally_related_form	00269963
12398682	_member_meronym	12399784
02324397	_derivationally_related_form	05040275
01732172	_hypernym	01712704
01184058	_hypernym	01182709
10731848	_derivationally_related_form	01921204
08478482	_hypernym	08058098
01328513	_derivationally_related_form	02728763
11845557	_hypernym	11842204
10741821	_derivationally_related_form	01999798
00912001	_hypernym	00911048
02147109	_derivationally_related_form	01049685
07193958	_derivationally_related_form	00786816
00284798	_derivationally_related_form	01904930
00910973	_derivationally_related_form	07209965
05388805	_has_part	05395286
11665781	_member_meronym	12808751
01642924	_derivationally_related_form	10046527
00785962	_derivationally_related_form	00633864
12532168	_has_part	07729485
02221454	_synset_domain_topic_of	08441203
01987938	_hypernym	01759182
01676313	_member_meronym	01679837
00081072	_derivationally_related_form	00694990
00477941	_derivationally_related_form	04692157
02003601	_derivationally_related_form	00622584
08647616	_derivationally_related_form	01543998
12322887	_member_meronym	12341126
13930385	_derivationally_related_form	02538086
05718254	_derivationally_related_form	02180529
01700934	_synset_domain_topic_of	00929718
04194289	_has_part	04188368
00759551	_derivationally_related_form	01765392
00532886	_hypernym	00126264
00443984	_derivationally_related_form	14480420
07215568	_hypernym	07215377
09774266	_hypernym	09824361
03709206	_hypernym	04147495
01123148	_derivationally_related_form	05142180
01240979	_hypernym	00215314
00075618	_hypernym	00070965
01929254	_hypernym	01904930
03154446	_hypernym	04451818
02760622	_derivationally_related_form	00472992
13783038	_hypernym	00031921
01754421	_also_see	02290998
12262327	_member_meronym	12262553
00215314	_derivationally_related_form	00355955
00641252	_synset_domain_topic_of	06004067
02492198	_derivationally_related_form	09616922
11910835	_member_meronym	12659730
14531392	_synset_domain_topic_of	06060845
09906538	_hypernym	09614684
00835609	_also_see	01827535
13486838	_hypernym	13518963
00622384	_derivationally_related_form	01266152
10388924	_synset_domain_topic_of	08441203
01027263	_derivationally_related_form	04659090
00168237	_hypernym	00165942
10646942	_derivationally_related_form	01925338
00456740	_derivationally_related_form	07369604
00492410	_derivationally_related_form	00276813
03139045	_derivationally_related_form	08440630
02222318	_derivationally_related_form	00105164
02335828	_derivationally_related_form	05112609
01097960	_hypernym	00792471
01564144	_derivationally_related_form	00737973
01226240	_also_see	01222360
02448185	_derivationally_related_form	00237078
01967792	_derivationally_related_form	00277569
01921204	_derivationally_related_form	00289175
00139729	_derivationally_related_form	07884567
03011521	_hypernym	02857023
01629000	_hypernym	01621555
05818741	_derivationally_related_form	02118933
00896141	_derivationally_related_form	09798534
10502046	_derivationally_related_form	01083044
06559365	_synset_domain_topic_of	08441203
00941990	_derivationally_related_form	05301908
02208903	_hypernym	02199590
01014066	_derivationally_related_form	02304982
07133701	_derivationally_related_form	00964694
08512259	_derivationally_related_form	02710673
02116980	_hypernym	02116118
02237338	_derivationally_related_form	06634095
01322221	_derivationally_related_form	14427239
12507236	_hypernym	11585340
02582042	_derivationally_related_form	10672192
00766418	_derivationally_related_form	07245125
07003119	_derivationally_related_form	01643464
04836683	_derivationally_related_form	00765977
05171045	_derivationally_related_form	00055539
00812526	_derivationally_related_form	01574292
01934554	_also_see	01116380
00302394	_derivationally_related_form	01847845
02677332	_derivationally_related_form	15237567
01009637	_derivationally_related_form	02478936
00868910	_hypernym	01023820
08398036	_synset_domain_topic_of	08199025
00654625	_derivationally_related_form	01012712
01541261	_hypernym	01507175
02958343	_has_part	03696065
05687338	_derivationally_related_form	02507736
00781912	_derivationally_related_form	02277448
00602255	_derivationally_related_form	05757049
00506672	_hypernym	00205046
00293916	_derivationally_related_form	02092309
00012267	_verb_group	02355596
00804802	_derivationally_related_form	07180787
10100761	_hypernym	10599354
00749991	_derivationally_related_form	02537812
01049266	_derivationally_related_form	02158896
05718254	_derivationally_related_form	02179518
13291189	_derivationally_related_form	02717831
01037498	_hypernym	00941990
10076957	_derivationally_related_form	00835903
00853195	_hypernym	00851933
05737153	_derivationally_related_form	00658052
03791235	_has_part	03401721
14856263	_hypernym	14580897
05538215	_hypernym	05538016
10673451	_derivationally_related_form	00875394
02950256	_hypernym	02746365
08060694	_hypernym	08061042
10480253	_hypernym	09605289
00380424	_hypernym	00138508
01724459	_verb_group	01725051
01031256	_derivationally_related_form	03709644
00637259	_derivationally_related_form	13331634
[truncated: 1,097 more rows]
