# Supplementary material
Source: ML conference proceedings conference paper supplement (https://proceedings.neurips.cc/paper_files/paper/2021/hash/0fd600c953cde8121262e322ef09f70e-Abstract.html)
Supplement: Supplementary file 1 [file 0fd600c953cde8121262e322ef09f70e-Supplemental.zip › Supplementary_Material_Paper_8745/data/GraIL-BM_WN18RR_v4/test/test-fact.txt]

00365647	_derivationally_related_form	07313241
02641957	_hypernym	02641463
03931044	_derivationally_related_form	02861617
13573666	_hypernym	13575433
10155849	_derivationally_related_form	05256862
00971463	_derivationally_related_form	00222472
04281375	_hypernym	04014297
00317888	_derivationally_related_form	01018366
02100709	_derivationally_related_form	10227266
00311338	_derivationally_related_form	00218208
01019524	_derivationally_related_form	01693881
01954852	_hypernym	01953810
00405079	_derivationally_related_form	00140393
01053144	_derivationally_related_form	05714894
01002740	_derivationally_related_form	00907919
04336034	_derivationally_related_form	00220869
03497657	_derivationally_related_form	02363128
05064037	_hypernym	05062748
06262567	_derivationally_related_form	01711965
08620061	_hypernym	00027167
00139908	_synset_domain_topic_of	00243918
10695555	_derivationally_related_form	01803380
00300537	_derivationally_related_form	10093908
10261388	_derivationally_related_form	01950502
15273626	_derivationally_related_form	00015498
00748011	_hypernym	00747029
00153961	_derivationally_related_form	00665886
01124794	_derivationally_related_form	02442205
00775156	_derivationally_related_form	07184149
02995998	_derivationally_related_form	02047263
13864763	_derivationally_related_form	02047807
01177703	_derivationally_related_form	02521816
02828648	_derivationally_related_form	00811171
04353803	_derivationally_related_form	00949288
06589574	_has_part	06258031
02454649	_hypernym	02454312
02567147	_derivationally_related_form	01170813
00828779	_derivationally_related_form	04997472
02833576	_derivationally_related_form	01884577
00600370	_derivationally_related_form	05700087
01203715	_derivationally_related_form	10470460
01665638	_derivationally_related_form	09963320
02045043	_verb_group	02045790
04586421	_derivationally_related_form	01522276
02159117	_hypernym	02153959
02958126	_derivationally_related_form	06946497
14064644	_hypernym	14064408
03194812	_hypernym	03851341
01798452	_derivationally_related_form	14376188
00458754	_derivationally_related_form	13575433
02523784	_verb_group	02523521
00702226	_derivationally_related_form	04438304
07255299	_hypernym	07255174
01790383	_derivationally_related_form	04904996
02156546	_derivationally_related_form	10746346
06883073	_hypernym	06882561
01126856	_derivationally_related_form	02427916
14425974	_derivationally_related_form	01493897
00557588	_derivationally_related_form	01080064
01051956	_derivationally_related_form	10034785
00356790	_derivationally_related_form	01389329
04780958	_derivationally_related_form	00908672
02748927	_derivationally_related_form	02681518
13887509	_hypernym	13910384
01363482	_derivationally_related_form	00717208
07620327	_hypernym	07612632
00891936	_derivationally_related_form	10149527
10380672	_derivationally_related_form	07072698
01036804	_derivationally_related_form	06608143
00368302	_derivationally_related_form	02043190
02577877	_derivationally_related_form	05695232
01168569	_derivationally_related_form	01122194
07143137	_derivationally_related_form	00876442
00308370	_derivationally_related_form	01843055
01904293	_derivationally_related_form	11527967
01460029	_derivationally_related_form	01254051
00043683	_hypernym	00044149
13777764	_hypernym	05074774
10213180	_derivationally_related_form	00808855
14706026	_derivationally_related_form	00261533
01076046	_derivationally_related_form	00362348
05905348	_hypernym	05902545
10492202	_derivationally_related_form	01454636
13464204	_derivationally_related_form	00208497
14477667	_hypernym	14477342
02001858	_derivationally_related_form	07883860
01061481	_derivationally_related_form	00943363
02047650	_derivationally_related_form	13878112
05694791	_derivationally_related_form	01807529
15046900	_derivationally_related_form	00445169
02028994	_derivationally_related_form	05088324
02237024	_derivationally_related_form	14875077
01015104	_hypernym	01014821
00627410	_derivationally_related_form	04761517
04081281	_hypernym	02913152
02400037	_derivationally_related_form	07500414
01097960	_derivationally_related_form	00045646
01582645	_derivationally_related_form	00263813
02671279	_verb_group	02502536
01821266	_derivationally_related_form	14481929
00605310	_hypernym	00605086
01643464	_derivationally_related_form	10029068
10214062	_derivationally_related_form	01993352
02702120	_hypernym	01116585
02124106	_also_see	02126022
05088056	_derivationally_related_form	00968211
13877918	_derivationally_related_form	00362128
01701311	_derivationally_related_form	06376154
05513807	_has_part	05514905
08612786	_derivationally_related_form	01582645
03845360	_derivationally_related_form	14966667
07223170	_derivationally_related_form	01041954
00173764	_also_see	01452593
01385170	_derivationally_related_form	07373803
10003283	_derivationally_related_form	02212825
08554440	_hypernym	08553535
02812482	_derivationally_related_form	08493064
00795008	_derivationally_related_form	00047317
03872495	_derivationally_related_form	01526956
01660640	_derivationally_related_form	03792334
14543552	_derivationally_related_form	01036319
04836074	_derivationally_related_form	00884778
10155849	_derivationally_related_form	07066659
07181935	_derivationally_related_form	00869126
01140794	_derivationally_related_form	02512053
00432839	_derivationally_related_form	13556509
08046759	_instance_hypernym	08392137
08691669	_hypernym	08524735
07254594	_derivationally_related_form	02379198
14562683	_hypernym	14561618
04530566	_has_part	04544805
10690849	_derivationally_related_form	00850501
01268457	_derivationally_related_form	14974264
01189224	_derivationally_related_form	07561112
01840238	_synset_domain_topic_of	00300441
00436879	_hypernym	00437125
14562324	_derivationally_related_form	01566490
00566322	_derivationally_related_form	10787470
10380672	_derivationally_related_form	00828901
14515463	_derivationally_related_form	02225492
04096066	_derivationally_related_form	01952750
02958343	_has_part	03327841
06893885	_derivationally_related_form	01711445
06056923	_hypernym	06055946
02701445	_derivationally_related_form	04236001
02025009	_derivationally_related_form	08274565
13898315	_hypernym	13897996
01646941	_also_see	01640850
00946105	_derivationally_related_form	05817845
02045790	_derivationally_related_form	02939919
00085432	_hypernym	00088481
10229498	_derivationally_related_form	02202928
02020413	_derivationally_related_form	14452616
00854420	_derivationally_related_form	00752431
00746232	_derivationally_related_form	02568065
15101854	_derivationally_related_form	01180701
00897564	_derivationally_related_form	09769345
13424183	_derivationally_related_form	02765464
01111816	_derivationally_related_form	00043902
00321486	_derivationally_related_form	03873064
02537407	_derivationally_related_form	10206173
01475831	_also_see	01483324
01273814	_hypernym	01356370
09349648	_derivationally_related_form	01882814
04446521	_has_part	04447861
01215694	_hypernym	02339413
07557165	_hypernym	07570720
02487573	_derivationally_related_form	10757193
00797878	_derivationally_related_form	02373336
01907258	_also_see	00897564
07007945	_derivationally_related_form	01716882
10544748	_hypernym	10008716
10014939	_hypernym	09770949
01896031	_derivationally_related_form	01392080
00796976	_verb_group	02237338
02079525	_derivationally_related_form	04493505
02669885	_hypernym	03297735
07881800	_hypernym	00021265
03626115	_derivationally_related_form	01531265
01986367	_derivationally_related_form	07361416
00218045	_derivationally_related_form	01661804
01039330	_derivationally_related_form	06791372
00643197	_derivationally_related_form	00704305
10435988	_derivationally_related_form	02048891
00545501	_derivationally_related_form	01704236
02313250	_derivationally_related_form	01150200
02466670	_derivationally_related_form	08163273
06387980	_has_part	06397903
01778568	_derivationally_related_form	02011810
01672014	_derivationally_related_form	03624966
01929254	_derivationally_related_form	15280497
03424630	_hypernym	03579982
03461385	_derivationally_related_form	02326198
02748927	_derivationally_related_form	04683814
04802629	_derivationally_related_form	00617748
11473138	_hypernym	11480698
02575723	_derivationally_related_form	00752954
02103162	_verb_group	01448100
00216174	_derivationally_related_form	02402825
03246454	_derivationally_related_form	01985923
02443049	_derivationally_related_form	10388732
07420770	_derivationally_related_form	00258857
05765901	_derivationally_related_form	02723733
07163988	_derivationally_related_form	00930806
01930117	_derivationally_related_form	03789946
04463679	_hypernym	02788689
01664172	_verb_group	01755504
02088627	_derivationally_related_form	07380144
02141973	_derivationally_related_form	04789274
07231294	_derivationally_related_form	00868591
02357228	_hypernym	02267060
00657550	_derivationally_related_form	00874977
01437888	_derivationally_related_form	08463063
01323958	_derivationally_related_form	10231087
13860548	_hypernym	13854649
03322099	_derivationally_related_form	02420232
01480149	_verb_group	01480469
02091165	_derivationally_related_form	00285889
10700517	_hypernym	10523519
06399995	_derivationally_related_form	02469443
03002351	_derivationally_related_form	06135915
01100145	_derivationally_related_form	10782940
01350971	_derivationally_related_form	07351031
01489722	_derivationally_related_form	14425974
02501738	_derivationally_related_form	00206927
00730301	_derivationally_related_form	08592656
00952841	_derivationally_related_form	07135734
08279298	_derivationally_related_form	09759069
00663160	_synset_domain_topic_of	07073447
08463647	_hypernym	08463063
01251928	_derivationally_related_form	04694441
05103946	_derivationally_related_form	01382086
00331655	_derivationally_related_form	01893988
02958017	_derivationally_related_form	08860123
00317700	_hypernym	00153263
05924920	_hypernym	05923696
00101191	_derivationally_related_form	01726172
00697062	_derivationally_related_form	09822955
00735936	_hypernym	00732746
10018021	_derivationally_related_form	00807461
02058994	_derivationally_related_form	15282696
02291708	_hypernym	02289295
03119510	_hypernym	03736970
01160729	_derivationally_related_form	01416193
01687569	_derivationally_related_form	07066659
08523483	_derivationally_related_form	00329831
00695523	_also_see	02451951
09941964	_hypernym	10317007
01169704	_verb_group	01186428
09938672	_derivationally_related_form	14984973
02706816	_hypernym	01116585
00439343	_derivationally_related_form	00330160
03802973	_hypernym	02676261
09962789	_derivationally_related_form	02077656
11197099	_instance_hypernym	10423225
01539633	_derivationally_related_form	14598079
14513259	_hypernym	13934596
06787037	_hypernym	06786629
02159427	_derivationally_related_form	10562749
01173826	_derivationally_related_form	01082153
07503430	_derivationally_related_form	01774426
00235368	_derivationally_related_form	15224293
04930307	_derivationally_related_form	00300537
03708036	_derivationally_related_form	00998399
01846658	_hypernym	01846916
02945161	_derivationally_related_form	02653996
00717208	_derivationally_related_form	01363482
00471196	_derivationally_related_form	07334490
00219012	_derivationally_related_form	14890659
14417146	_derivationally_related_form	00483801
02240881	_derivationally_related_form	10575787
00483466	_derivationally_related_form	13898315
01452255	_derivationally_related_form	10162507
03065685	_derivationally_related_form	14854262
10087736	_hypernym	10266848
01918183	_derivationally_related_form	00284101
00066901	_derivationally_related_form	02523521
10140783	_derivationally_related_form	00658052
08366202	_derivationally_related_form	00298041
03519981	_hypernym	04096066
00105778	_derivationally_related_form	09930876
08062623	_derivationally_related_form	01745722
00052672	_derivationally_related_form	04935528
07191777	_derivationally_related_form	00777931
09927089	_derivationally_related_form	01533442
03532672	_hypernym	03736970
00044353	_derivationally_related_form	14481929
08647616	_synset_domain_topic_of	02691156
00263044	_derivationally_related_form	14463826
02742468	_derivationally_related_form	01859586
02577586	_hypernym	02575082
01765908	_derivationally_related_form	05832264
00876665	_derivationally_related_form	09953965
05244934	_hypernym	04682462
15237567	_derivationally_related_form	02677332
00216174	_derivationally_related_form	02422026
02958126	_derivationally_related_form	06950528
02924116	_derivationally_related_form	01950128
07458453	_derivationally_related_form	01086103
09965134	_derivationally_related_form	01038538
00928077	_derivationally_related_form	00709625
00850501	_derivationally_related_form	07123870
07460104	_hypernym	07458453
01149480	_derivationally_related_form	00235368
08274923	_derivationally_related_form	02599939
01912709	_hypernym	01912159
00384620	_derivationally_related_form	00258854
05704266	_derivationally_related_form	00601043
05923696	_derivationally_related_form	00624967
02913152	_has_part	03579538
00471711	_derivationally_related_form	00395333
00512843	_hypernym	00511817
00774344	_derivationally_related_form	07150138
00092293	_derivationally_related_form	14561618
14543552	_derivationally_related_form	02697120
00788184	_derivationally_related_form	07193958
04842515	_derivationally_related_form	01793177
00634586	_hypernym	00633864
00064479	_derivationally_related_form	05155821
02175578	_derivationally_related_form	04555897
13482330	_derivationally_related_form	02743727
09845999	_derivationally_related_form	04683814
00380159	_derivationally_related_form	07444668
14561618	_derivationally_related_form	00208497
08683548	_hypernym	08574314
01227137	_derivationally_related_form	04873550
00180837	_derivationally_related_form	00251013
01587077	_derivationally_related_form	04780755
10565302	_derivationally_related_form	00697062
08337324	_hypernym	08077292
04188368	_hypernym	03670849
02098458	_verb_group	01505254
09811852	_derivationally_related_form	02950256
01137138	_verb_group	01134781
04216963	_has_part	03309465
05683582	_hypernym	05669934
01654271	_derivationally_related_form	10201535
02482425	_derivationally_related_form	00222248
10641551	_derivationally_related_form	00796976
14429608	_derivationally_related_form	00658052
01209135	_verb_group	01123887
00208497	_derivationally_related_form	14561618
01533442	_verb_group	01532434
01244410	_also_see	02510879
01233027	_hypernym	01410223
00259177	_hypernym	00258854
02188699	_has_part	02152212
00335988	_derivationally_related_form	00009631
02237338	_derivationally_related_form	06634239
10506762	_hypernym	10622053
01161635	_derivationally_related_form	07335243
00335653	_derivationally_related_form	00386715
01219993	_derivationally_related_form	01266945
00215683	_derivationally_related_form	02402409
10338707	_derivationally_related_form	01327301
02196690	_derivationally_related_form	14607521
00786458	_derivationally_related_form	10703692
02250625	_derivationally_related_form	13282550
10020890	_hypernym	10305802
02126382	_derivationally_related_form	03916031
02480923	_hypernym	00795863
01020936	_hypernym	01019524
07333649	_hypernym	07355491
00264529	_derivationally_related_form	00220869
00072012	_derivationally_related_form	13533886
01405044	_hypernym	01511706
01037650	_derivationally_related_form	06610332
01073822	_derivationally_related_form	07813107
04105438	_hypernym	04014297
06210363	_derivationally_related_form	02611373
00368847	_derivationally_related_form	00612114
04490091	_has_part	04294614
05636048	_hypernym	05638987
04226322	_hypernym	02887209
02043982	_derivationally_related_form	08612049
10044879	_derivationally_related_form	00592102
15145586	_derivationally_related_form	09827683
00406243	_derivationally_related_form	14031108
13855627	_derivationally_related_form	02666882
00999787	_derivationally_related_form	00922867
02033805	_hypernym	01907258
00962634	_similar_to	00963283
00814850	_derivationally_related_form	10510546
10037385	_derivationally_related_form	01190494
07410207	_hypernym	07338681
01675963	_verb_group	02749247
10491309	_hypernym	10480253
10451590	_hypernym	10207831
05068080	_derivationally_related_form	02038791
10712835	_derivationally_related_form	06651577
01158690	_derivationally_related_form	00467717
08879197	_instance_hypernym	08524735
01253665	_hypernym	00231887
01955984	_verb_group	02742232
00877345	_derivationally_related_form	00645939
02761834	_has_part	03537412
00257770	_hypernym	00255214
00884011	_derivationally_related_form	10482054
11527967	_derivationally_related_form	01904293
01325536	_verb_group	01323958
00240938	_derivationally_related_form	02384041
04620558	_derivationally_related_form	01229631
07889510	_hypernym	07886849
14489113	_derivationally_related_form	00432839
00113818	_derivationally_related_form	00758972
01125693	_derivationally_related_form	02466670
03427296	_has_part	03521076
13556509	_hypernym	13464204
02667228	_hypernym	02666882
01537409	_derivationally_related_form	00072261
02141973	_derivationally_related_form	06890846
01168468	_derivationally_related_form	00838367
14110411	_derivationally_related_form	00443384
05798569	_hypernym	05924920
00869596	_derivationally_related_form	09612291
13934900	_derivationally_related_form	02673134
01398941	_hypernym	01398212
05068461	_derivationally_related_form	02037090
00968211	_derivationally_related_form	05088324
01136614	_derivationally_related_form	02746365
02464342	_hypernym	02463704
02077656	_also_see	01973125
02632353	_derivationally_related_form	14449405
09994119	_hypernym	09993901
11466043	_derivationally_related_form	00372665
00793271	_derivationally_related_form	01157850
10036266	_derivationally_related_form	01165043
02068413	_derivationally_related_form	07436100
04490091	_derivationally_related_form	01954341
02586619	_derivationally_related_form	10541229
07884567	_hypernym	07881800
07365849	_derivationally_related_form	01859586
05696020	_derivationally_related_form	00456740
01846320	_derivationally_related_form	00312784
01859586	_hypernym	01859221
00407633	_derivationally_related_form	03793186
07375635	_derivationally_related_form	02014553
07142566	_hypernym	07140659
05196582	_derivationally_related_form	02539334
01912159	_derivationally_related_form	00296946
01726172	_verb_group	01725051
00434374	_verb_group	00358431
02052675	_hypernym	02052476
06376154	_hypernym	07092158
07123870	_derivationally_related_form	01053771
02700867	_verb_group	02701210
01201429	_derivationally_related_form	02431320
03525454	_derivationally_related_form	01217043
03233905	_derivationally_related_form	01995211
07196682	_hypernym	06285090
01674717	_derivationally_related_form	03965907
00152018	_derivationally_related_form	01026095
07220773	_has_part	06396930
06490887	_hypernym	06481320
00978549	_derivationally_related_form	07128692
00297062	_hypernym	00295701
07475364	_derivationally_related_form	02473688
13650045	_has_part	13649791
07472929	_derivationally_related_form	01094086
00601783	_derivationally_related_form	07183151
01606205	_hypernym	01587062
10597234	_derivationally_related_form	02409941
05651971	_derivationally_related_form	00272391
01227137	_also_see	01222884
01244410	_also_see	01460421
01877355	_hypernym	01876530
00973056	_derivationally_related_form	04472726
01049685	_derivationally_related_form	02148369
11498040	_derivationally_related_form	01505254
01169067	_hypernym	01168468
04412901	_hypernym	04306080
02653996	_derivationally_related_form	04411264
01935476	_derivationally_related_form	02834778
08513163	_hypernym	08552138
10527334	_derivationally_related_form	00963283
00403401	_derivationally_related_form	11495041
02133435	_derivationally_related_form	04674715
10287213	_derivationally_related_form	01475831
06595351	_has_part	06258228
04304375	_hypernym	03273061
10221312	_derivationally_related_form	00853633
01448100	_also_see	01592456
13754293	_derivationally_related_form	00153263
08617963	_derivationally_related_form	02693168
02691156	_has_part	03295928
02194495	_hypernym	02194286
02727039	_derivationally_related_form	05125377
13575433	_derivationally_related_form	03000447
01155687	_derivationally_related_form	00506658
00869126	_derivationally_related_form	07183151
02742232	_derivationally_related_form	03244388
06843520	_derivationally_related_form	01589363
00276813	_derivationally_related_form	01531998
05716744	_hypernym	05715283
00050037	_derivationally_related_form	02471327
15282696	_derivationally_related_form	02058994
07561112	_hypernym	07560652
02818832	_derivationally_related_form	02337066
10467395	_derivationally_related_form	02984104
06811625	_derivationally_related_form	00931852
02593354	_derivationally_related_form	10478960
01036804	_derivationally_related_form	07137129
06730780	_derivationally_related_form	00843468
03949442	_derivationally_related_form	01163847
08647616	_synset_domain_topic_of	07006119
00814458	_verb_group	00865387
04125853	_hypernym	02827606
02517202	_derivationally_related_form	00732746
01456771	_derivationally_related_form	07351031
01189604	_hypernym	01196037
08628921	_derivationally_related_form	02727039
05960464	_hypernym	05943300
04811126	_derivationally_related_form	02480923
13381734	_derivationally_related_form	02311260
02532595	_derivationally_related_form	00639556
01163779	_hypernym	01161161
02515080	_hypernym	02514187
01350699	_verb_group	01349130
00330457	_derivationally_related_form	00439343
00796588	_derivationally_related_form	13935227
00567044	_derivationally_related_form	01512259
00371846	_derivationally_related_form	01329026
02190188	_verb_group	00461493
01582645	_derivationally_related_form	00938419
02272549	_derivationally_related_form	00088481
01233027	_derivationally_related_form	00125436
06876309	_hypernym	06873252
06216160	_derivationally_related_form	09957156
03422589	_hypernym	04494204
00291873	_derivationally_related_form	05018103
01180351	_verb_group	01181295
00199912	_hypernym	00199659
00205349	_derivationally_related_form	00796976
02748927	_derivationally_related_form	05003590
09975425	_derivationally_related_form	05638063
01564144	_derivationally_related_form	00217773
05718254	_derivationally_related_form	02135048
02165543	_hypernym	02131279
03282933	_hypernym	03816849
00150287	_derivationally_related_form	13427078
02471690	_derivationally_related_form	06507041
02568065	_derivationally_related_form	00746587
01144876	_hypernym	01133281
01453433	_derivationally_related_form	00114871
02700455	_verb_group	02659763
02995998	_derivationally_related_form	01458973
00754424	_derivationally_related_form	02574516
13421832	_derivationally_related_form	00724029
05513807	_has_part	05524615
03777283	_derivationally_related_form	01743784
11466043	_derivationally_related_form	02333358
07813107	_hypernym	07809368
02817650	_derivationally_related_form	01418179
00891936	_derivationally_related_form	06686174
14416845	_hypernym	14373582
07290278	_hypernym	07289956
02992070	_derivationally_related_form	14513259
02689299	_derivationally_related_form	00367976
00995119	_derivationally_related_form	05160796
03793186	_derivationally_related_form	00407633
01194418	_derivationally_related_form	10186774
02459633	_derivationally_related_form	03259505
01387301	_derivationally_related_form	03965907
01704236	_derivationally_related_form	00545501
01105186	_derivationally_related_form	07120524
00998399	_derivationally_related_form	00910203
07512465	_derivationally_related_form	02105990
04468005	_member_meronym	02959942
14704966	_derivationally_related_form	01332205
02397460	_derivationally_related_form	15291498
01026095	_derivationally_related_form	06885083
02741357	_hypernym	02741149
01327301	_derivationally_related_form	00223720
05079638	_hypernym	05074774
00146572	_derivationally_related_form	00612114
02593354	_derivationally_related_form	01135795
08893223	_instance_hypernym	09203827
02027411	_derivationally_related_form	07959943
10206173	_derivationally_related_form	00819508
00437125	_derivationally_related_form	00195569
00401783	_derivationally_related_form	00024814
00336539	_derivationally_related_form	09243769
01250335	_derivationally_related_form	02482425
07622061	_has_part	07622261
00953923	_hypernym	00953216
01112584	_verb_group	00669970
02693319	_hypernym	02690708
00978549	_derivationally_related_form	07131854
01224744	_derivationally_related_form	10378412
15129927	_derivationally_related_form	00297906
04561734	_hypernym	03309808
09625401	_derivationally_related_form	02496816
00858849	_derivationally_related_form	00016380
08877208	_instance_hypernym	08633957
01223182	_hypernym	00140967
01845720	_derivationally_related_form	10771392
00217014	_derivationally_related_form	01619929
07410207	_derivationally_related_form	00335923
03051540	_derivationally_related_form	00047945
02672859	_derivationally_related_form	13529616
02274482	_derivationally_related_form	00085432
04101701	_hypernym	04574999
05513529	_hypernym	05509146
01363482	_derivationally_related_form	03875218
00309115	_derivationally_related_form	01915365
09757944	_derivationally_related_form	01196037
01233347	_derivationally_related_form	04515129
01150467	_derivationally_related_form	00172732
02742322	_hypernym	03051540
00203649	_hypernym	00203342
14562324	_derivationally_related_form	01161635
02593001	_hypernym	02575082
10051975	_derivationally_related_form	00416135
10492202	_derivationally_related_form	01453433
00463246	_has_part	00556313
07433145	_derivationally_related_form	02047650
01946408	_derivationally_related_form	00351334
02225911	_hypernym	02339413
06619065	_derivationally_related_form	02148788
10674130	_derivationally_related_form	02534492
06778102	_derivationally_related_form	00853958
07254836	_derivationally_related_form	02227487
02017937	_hypernym	02053941
00809654	_derivationally_related_form	10022759
00123234	_derivationally_related_form	01134238
07486229	_derivationally_related_form	01825237
02579447	_derivationally_related_form	10257647
00535452	_derivationally_related_form	05070032
02632567	_hypernym	02632353
10569744	_derivationally_related_form	00599472
14607521	_derivationally_related_form	02196690
09960688	_derivationally_related_form	00888786
06677302	_hypernym	06359877
03665366	_derivationally_related_form	00291873
09847010	_derivationally_related_form	02317970
00395797	_derivationally_related_form	00449692
08399586	_derivationally_related_form	02727039
10645854	_derivationally_related_form	01918803
00051761	_hypernym	00047945
02384275	_derivationally_related_form	07453195
04500060	_derivationally_related_form	02089420
00782057	_derivationally_related_form	10623354
06201136	_derivationally_related_form	10402086
08612049	_hypernym	08616311
08397255	_derivationally_related_form	01097031
01069980	_derivationally_related_form	01189604
02384686	_derivationally_related_form	10150940
14578104	_derivationally_related_form	02751597
00759657	_derivationally_related_form	07168131
08057633	_derivationally_related_form	01449974
01091427	_derivationally_related_form	09773245
02836035	_has_part	04283378
01739814	_derivationally_related_form	10078806
04359335	_hypernym	03736970
07183151	_hypernym	07181935
01070187	_derivationally_related_form	01189224
01083645	_derivationally_related_form	02228698
07891726	_hypernym	07884567
00978173	_derivationally_related_form	06726158
01843055	_derivationally_related_form	10596689
07176243	_derivationally_related_form	02316649
00060201	_derivationally_related_form	02075049
07255174	_hypernym	07205573
01094086	_derivationally_related_form	09889691
13480541	_derivationally_related_form	00451838
02000868	_derivationally_related_form	10100124
02406585	_derivationally_related_form	01010458
01580928	_derivationally_related_form	04493505
02517768	_member_meronym	02518488
01469770	_derivationally_related_form	07186148
02537407	_hypernym	02575082
10562283	_derivationally_related_form	01275762
06767777	_derivationally_related_form	00853958
01486312	_derivationally_related_form	02974697
06508816	_derivationally_related_form	01001643
01779165	_also_see	01785748
02487573	_derivationally_related_form	09887850
15266265	_hypernym	15291498
01238640	_hypernym	01410223
01350699	_hypernym	01223182
09790278	_hypernym	10488016
07961480	_derivationally_related_form	01484714
01101753	_derivationally_related_form	02454649
00271946	_derivationally_related_form	01159025
01128655	_hypernym	01128390
00276068	_hypernym	00275843
10203949	_hypernym	10307234
02334867	_derivationally_related_form	02738031
02278830	_hypernym	02289295
04574999	_derivationally_related_form	01935476
08524130	_hypernym	08523483
01027508	_derivationally_related_form	06539770
01886407	_also_see	02360448
04994413	_hypernym	04992163
04161981	_derivationally_related_form	02701962
06520944	_derivationally_related_form	00888786
01486312	_hypernym	01587062
01963942	_derivationally_related_form	09869171
00205543	_derivationally_related_form	00614057
07487955	_hypernym	07484265
09448361	_has_part	09349648
02741960	_derivationally_related_form	00251013
00910203	_derivationally_related_form	00998399
01628302	_derivationally_related_form	01793177
00470084	_derivationally_related_form	00231567
00954271	_derivationally_related_form	07221094
01158181	_derivationally_related_form	10479561
03427296	_has_part	03682487
00692907	_derivationally_related_form	01219075
00867231	_derivationally_related_form	06791372
01844859	_synset_domain_topic_of	00300441
07679356	_derivationally_related_form	01337653
06220616	_derivationally_related_form	10618848
01849746	_derivationally_related_form	05046471
00206927	_derivationally_related_form	02501738
07255027	_derivationally_related_form	00804476
00646833	_hypernym	00634276
09354511	_hypernym	08523483
02353844	_synset_domain_topic_of	00610738
00955987	_derivationally_related_form	01116585
00368302	_derivationally_related_form	00270005
02460619	_derivationally_related_form	06522501
08463647	_derivationally_related_form	01031256
08552138	_derivationally_related_form	02812482
06502378	_hypernym	06647206
02418205	_derivationally_related_form	09993901
14562142	_derivationally_related_form	00388635
00056188	_derivationally_related_form	13485408
05716577	_derivationally_related_form	02337667
04099969	_has_part	04098513
03875218	_hypernym	03058107
05812038	_derivationally_related_form	02676496
01163779	_derivationally_related_form	10069427
08890097	_has_part	08891889
01097960	_derivationally_related_form	01156438
07305234	_derivationally_related_form	01797730
00095502	_derivationally_related_form	02421374
00877327	_hypernym	00789138
04530566	_has_part	04554211
00064479	_derivationally_related_form	05160796
01485839	_derivationally_related_form	02774152
05750163	_derivationally_related_form	10155849
05162455	_derivationally_related_form	00233335
00263044	_derivationally_related_form	14464203
01539633	_synset_domain_topic_of	06084469
03817647	_hypernym	04596852
00023383	_also_see	00632438
07365193	_hypernym	07365024
07184149	_derivationally_related_form	00774344
00320852	_derivationally_related_form	02502536
00597265	_hypernym	00596807
10433164	_synset_domain_topic_of	02686568
01112584	_derivationally_related_form	00794367
00828082	_derivationally_related_form	00048633
02730471	_hypernym	02133435
00956405	_derivationally_related_form	00373544
02764765	_derivationally_related_form	07411645
00514871	_derivationally_related_form	02446651
01920932	_derivationally_related_form	00288970
00312932	_derivationally_related_form	01846320
01803003	_derivationally_related_form	07519040
02462580	_derivationally_related_form	00182213
00690501	_hypernym	00671351
03302938	_has_part	04218564
00138508	_derivationally_related_form	00346693
02149302	_derivationally_related_form	14574846
00901799	_derivationally_related_form	06397903
00512749	_derivationally_related_form	02468864
00358431	_derivationally_related_form	13962498
00989602	_derivationally_related_form	07071483
02075049	_hypernym	02009433
15152817	_derivationally_related_form	09605289
00536304	_similar_to	00535452
00218208	_hypernym	00217014
05696020	_derivationally_related_form	00456596
01474550	_derivationally_related_form	00212808
09814660	_derivationally_related_form	01011031
02806261	_derivationally_related_form	01202728
00894552	_derivationally_related_form	00606335
00234892	_derivationally_related_form	00138508
02421921	_hypernym	02421374
04080454	_derivationally_related_form	02175958
10013242	_derivationally_related_form	01167981
04989657	_derivationally_related_form	02009280
00593108	_derivationally_related_form	10474645
00524530	_derivationally_related_form	00386392
00257770	_derivationally_related_form	00037919
07308889	_derivationally_related_form	02155493
07129202	_derivationally_related_form	01054186
00952182	_hypernym	00978549
00483801	_derivationally_related_form	14417146
01217780	_derivationally_related_form	00406800
01675963	_derivationally_related_form	03579355
01979901	_derivationally_related_form	00052500
00870453	_derivationally_related_form	01385170
01686956	_derivationally_related_form	03931044
00747135	_derivationally_related_form	09824135
07578363	_has_part	07578879
00323856	_synset_domain_topic_of	00243918
04956594	_derivationally_related_form	09938672
06207561	_derivationally_related_form	01778568
00990249	_hypernym	00989201
02542280	_derivationally_related_form	01203676
01415807	_derivationally_related_form	01160729
01224517	_hypernym	01224031
01143838	_verb_group	02092309
07269916	_derivationally_related_form	02851550
00512843	_derivationally_related_form	00854150
07129202	_hypernym	07128946
00282076	_derivationally_related_form	04695176
00611972	_derivationally_related_form	10450303
02388143	_hypernym	02382948
02764765	_hypernym	02763740
01300437	_derivationally_related_form	03879116
00752493	_also_see	02486693
05036394	_derivationally_related_form	00290302
00413876	_derivationally_related_form	10583387
01852701	_derivationally_related_form	08521816
01959294	_also_see	02371718
07445896	_derivationally_related_form	02689299
14818238	_hypernym	14806838
13573666	_derivationally_related_form	00459114
02582042	_derivationally_related_form	06556692
00949974	_derivationally_related_form	00122106
01955984	_hypernym	01841079
10646325	_derivationally_related_form	08440630
04574999	_derivationally_related_form	01887020
00263947	_derivationally_related_form	00510364
13877918	_hypernym	13907415
11465017	_derivationally_related_form	01902783
04837931	_derivationally_related_form	01352067
10468559	_derivationally_related_form	02984104
06522501	_derivationally_related_form	02460619
02958343	_has_part	04294614
00414179	_hypernym	00413239
01542207	_derivationally_related_form	15049594
01680132	_derivationally_related_form	01896031
02829696	_derivationally_related_form	02033137
10216106	_derivationally_related_form	02271137
02502916	_derivationally_related_form	05790572
04188368	_synset_domain_topic_of	00314469
01167780	_derivationally_related_form	03200357
02269894	_hypernym	01143838
01128655	_derivationally_related_form	00579712
01535246	_derivationally_related_form	00255710
01234345	_derivationally_related_form	00421535
14541852	_derivationally_related_form	01036319
03701391	_hypernym	02760429
04952242	_derivationally_related_form	00278551
00036178	_verb_group	00036362
01593254	_derivationally_related_form	03659292
02153709	_derivationally_related_form	00945401
07500414	_derivationally_related_form	02400037
09448361	_derivationally_related_form	09415938
00796315	_derivationally_related_form	00065791
13344071	_hypernym	13329641
00788766	_hypernym	00786195
01639105	_derivationally_related_form	09935233
06843520	_derivationally_related_form	01589056
09892831	_derivationally_related_form	02447001
00073343	_derivationally_related_form	10000007
03061505	_hypernym	03079741
00946105	_derivationally_related_form	06482401
14479615	_synset_domain_topic_of	06084469
01526521	_hypernym	01525720
00341695	_derivationally_related_form	01506583
01168569	_derivationally_related_form	01072262
06181584	_hypernym	06172789
02686568	_has_part	02932019
07368256	_derivationally_related_form	00363493
14374432	_synset_domain_topic_of	06055946
09827683	_hypernym	09918248
08871007	_has_part	08881674
09867956	_hypernym	10054657
01233993	_derivationally_related_form	10538272
00311338	_derivationally_related_form	07331013
00338071	_derivationally_related_form	07409121
00074038	_derivationally_related_form	10000007
04213626	_hypernym	04362025
01037910	_derivationally_related_form	00512522
00796392	_derivationally_related_form	06542047
13857486	_hypernym	13854649
01881180	_derivationally_related_form	10660729
05913275	_derivationally_related_form	01426077
00052043	_hypernym	00047945
01688771	_derivationally_related_form	00900957
02544348	_derivationally_related_form	10072708
10502576	_derivationally_related_form	02059462
07127006	_derivationally_related_form	00031820
02227487	_derivationally_related_form	07254594
15184170	_hypernym	15183802
01904293	_verb_group	01874568
01955984	_derivationally_related_form	10403876
09889941	_hypernym	10744164
14292090	_derivationally_related_form	00336260
02828648	_hypernym	03519981
01128071	_derivationally_related_form	04051825
10298912	_derivationally_related_form	00595146
13757249	_derivationally_related_form	01919711
10369955	_derivationally_related_form	01126360
00730301	_derivationally_related_form	08512736
00189565	_derivationally_related_form	02525312
02079933	_derivationally_related_form	11512818
02058794	_also_see	02523275
00470084	_derivationally_related_form	00233386
06778102	_derivationally_related_form	10224098
00617989	_derivationally_related_form	01233993
01354006	_derivationally_related_form	04159354
13417410	_hypernym	13416345
02991122	_derivationally_related_form	02743547
01016778	_derivationally_related_form	09814660
01912159	_derivationally_related_form	10727016
05064037	_derivationally_related_form	01689752
01826723	_derivationally_related_form	14038993
00747757	_derivationally_related_form	01352067
01248191	_derivationally_related_form	02502536
10678472	_hypernym	10525134
08253815	_derivationally_related_form	01167981
00046534	_derivationally_related_form	00828237
06767777	_derivationally_related_form	01058880
02518990	_hypernym	01432517
00161739	_derivationally_related_form	01696648
06624161	_has_part	07012534
14455206	_derivationally_related_form	01088749
00274941	_derivationally_related_form	00281101
14490110	_derivationally_related_form	02348182
01414288	_derivationally_related_form	00133338
10180580	_derivationally_related_form	01116585
02744977	_derivationally_related_form	06892016
06615561	_derivationally_related_form	01505254
02066939	_derivationally_related_form	07405893
05913275	_derivationally_related_form	01022906
02559199	_derivationally_related_form	10008716
14574846	_derivationally_related_form	00864159
10570019	_derivationally_related_form	00599472
04473432	_has_part	03671473
10792856	_hypernym	10241300
01236795	_hypernym	01236164
01350699	_derivationally_related_form	00404726
08543081	_hypernym	08523483
05981230	_derivationally_related_form	00708980
02733122	_verb_group	02202928
00788184	_derivationally_related_form	07193184
04175380	_hypernym	04381994
06554981	_derivationally_related_form	02273293
02544348	_derivationally_related_form	14541852
00281101	_derivationally_related_form	00274941
01362736	_derivationally_related_form	00717208
01000214	_derivationally_related_form	10516874
00695523	_derivationally_related_form	01179707
00433232	_hypernym	00156601
06275634	_hypernym	06253690
00036362	_derivationally_related_form	00255710
02064131	_derivationally_related_form	08182716
00852506	_hypernym	00851933
02228698	_derivationally_related_form	01083645
02774630	_hypernym	02974697
10682380	_derivationally_related_form	01011031
00775831	_derivationally_related_form	00202284
01421622	_derivationally_related_form	03573282
00768778	_derivationally_related_form	10775379
03401721	_hypernym	03294048
10182499	_derivationally_related_form	08078020
01097500	_derivationally_related_form	01157850
10012815	_derivationally_related_form	00650016
00850192	_derivationally_related_form	10561320
00095971	_derivationally_related_form	00384620
02136271	_synset_domain_topic_of	06094774
14539960	_hypernym	14539268
00046109	_derivationally_related_form	00299580
00828779	_also_see	01716227
02355596	_hypernym	01111816
00754731	_hypernym	00752764
00748515	_derivationally_related_form	01172275
01158596	_derivationally_related_form	14708720
01392080	_derivationally_related_form	01896031
00331655	_derivationally_related_form	01864634
00650016	_derivationally_related_form	05748054
02970685	_has_part	04162706
10008716	_derivationally_related_form	00388635
04692157	_derivationally_related_form	00263044
13416345	_derivationally_related_form	02262139
06790042	_hypernym	06789411
07354731	_derivationally_related_form	01111028
01457954	_derivationally_related_form	13534274
14868243	_hypernym	14580897
02531625	_derivationally_related_form	00636461
01785971	_derivationally_related_form	00758972
02531422	_also_see	01076793
10191192	_hypernym	10557854
02984104	_derivationally_related_form	10467395
07129202	_derivationally_related_form	01055404
02120458	_derivationally_related_form	04648207
08954057	_instance_hypernym	09203827
08161068	_hypernym	08160276
01532589	_derivationally_related_form	09927089
00386392	_also_see	00404202
00550117	_derivationally_related_form	00196084
01029500	_derivationally_related_form	06343520
07407777	_derivationally_related_form	01377032
09773245	_derivationally_related_form	13980288
08890097	_has_part	08892971
02126022	_hypernym	02125641
06542047	_derivationally_related_form	00796392
04718563	_derivationally_related_form	00604617
01038666	_derivationally_related_form	10757193
01882814	_derivationally_related_form	09409203
06313651	_hypernym	06312966
06960566	_hypernym	06960298
01719921	_derivationally_related_form	00548326
00755745	_derivationally_related_form	05892651
05071556	_derivationally_related_form	00392960
02528380	_derivationally_related_form	07319652
14493426	_derivationally_related_form	02314275
13575433	_hypernym	13446390
00567291	_derivationally_related_form	14704465
02632567	_derivationally_related_form	14493426
02673134	_verb_group	02743020
00209546	_derivationally_related_form	02473431
00759694	_derivationally_related_form	10702781
07520612	_derivationally_related_form	01781983
02317970	_derivationally_related_form	14493716
01675963	_derivationally_related_form	04683814
10757193	_derivationally_related_form	02619424
02541302	_derivationally_related_form	07950418
00136800	_derivationally_related_form	13446197
04335435	_hypernym	04170037
03519981	_has_part	04466386
07186828	_hypernym	07185325
01437888	_derivationally_related_form	03709644
00948071	_derivationally_related_form	09904057
02575723	_derivationally_related_form	10022759
07540602	_derivationally_related_form	01798936
02030424	_derivationally_related_form	07331759
05895723	_hypernym	05893653
02545045	_derivationally_related_form	04858785
10523519	_hypernym	09620078
01693881	_derivationally_related_form	03257586
01380122	_derivationally_related_form	05088324
00089027	_hypernym	00088481
00458754	_verb_group	00458471
00347652	_derivationally_related_form	01889610
04928416	_derivationally_related_form	01646941
00043902	_hypernym	00036762
14441825	_derivationally_related_form	02646931
01927447	_hypernym	01926311
01301410	_derivationally_related_form	03525252
01235859	_derivationally_related_form	05079638
03061674	_hypernym	04161358
01864865	_derivationally_related_form	07339098
02784732	_derivationally_related_form	01273263
03876519	_hypernym	03453809
03150232	_derivationally_related_form	01223616
00870453	_hypernym	00869583
02567147	_derivationally_related_form	13980845
00107943	_derivationally_related_form	14292090
07073447	_hypernym	07069948
01606574	_derivationally_related_form	05068080
00852506	_derivationally_related_form	09965134
01809655	_also_see	02047807
02046755	_derivationally_related_form	00342755
07066659	_derivationally_related_form	10155849
01054399	_derivationally_related_form	07129202
00403466	_hypernym	00403092
00565302	_hypernym	00556313
00338071	_derivationally_related_form	13993517
02893338	_derivationally_related_form	06702458
02269894	_derivationally_related_form	00945916
00311663	_also_see	01899360
06558088	_derivationally_related_form	00795863
00167934	_derivationally_related_form	00261405
00107943	_verb_group	00108303
00281132	_hypernym	00280853
00255710	_derivationally_related_form	01535246
14989820	_derivationally_related_form	00287258
03340723	_hypernym	03851341
01935476	_derivationally_related_form	04574999
05748786	_derivationally_related_form	02666882
00731789	_hypernym	00464321
09483738	_hypernym	05625465
09954479	_derivationally_related_form	00818553
00853633	_derivationally_related_form	10221312
07071483	_hypernym	07066659
00325502	_derivationally_related_form	01921772
00384620	_derivationally_related_form	00261405
04566257	_has_part	04565375
03151077	_hypernym	02851099
04990877	_derivationally_related_form	01454636
15287830	_derivationally_related_form	00343771
10208287	_derivationally_related_form	00788184
00927430	_derivationally_related_form	06651577
05959954	_hypernym	05943300
02021532	_verb_group	02020590
00540235	_hypernym	00153263
00953216	_derivationally_related_form	06397307
01263018	_derivationally_related_form	00477941
01719302	_derivationally_related_form	09765278
06696483	_derivationally_related_form	02546075
14485064	_hypernym	14483917
00814850	_derivationally_related_form	07200813
04842515	_derivationally_related_form	01587077
07964495	_synset_domain_topic_of	06148148
14706026	_hypernym	14705533
00259894	_derivationally_related_form	02250625
13258362	_derivationally_related_form	02278830
02423762	_hypernym	02422663
09925592	_derivationally_related_form	02275365
05060189	_derivationally_related_form	01270175
09225146	_synset_domain_topic_of	09411430
01013040	_derivationally_related_form	06684572
04391838	_derivationally_related_form	00999270
01184625	_derivationally_related_form	13366311
13996061	_derivationally_related_form	02421374
00490722	_derivationally_related_form	00285557
01239619	_hypernym	01236164
00336260	_verb_group	00336539
03137228	_derivationally_related_form	01912159
01966861	_derivationally_related_form	00120010
10224098	_derivationally_related_form	00853633
02758753	_hypernym	02671421
02388950	_derivationally_related_form	01232412
10599806	_derivationally_related_form	07110615
00329227	_derivationally_related_form	02067689
05658226	_hypernym	05653848
01884577	_derivationally_related_form	05069199
02679142	_derivationally_related_form	00949288
08253640	_derivationally_related_form	01186208
08630985	_hypernym	00027167
00329831	_derivationally_related_form	08521816
01640850	_also_see	00666058
02464342	_derivationally_related_form	10608385
00295697	_derivationally_related_form	03451473
10635460	_hypernym	10479561
00104539	_derivationally_related_form	01508368
05123416	_derivationally_related_form	02685951
00814850	_hypernym	00757544
08274565	_derivationally_related_form	02025009
02584097	_hypernym	02075462
04446521	_derivationally_related_form	00074038
10174695	_derivationally_related_form	08891595
13282550	_derivationally_related_form	02249741
10176111	_derivationally_related_form	01881180
01002740	_synset_domain_topic_of	06613686
06489659	_hypernym	06481320
05658603	_derivationally_related_form	02123672
10294602	_derivationally_related_form	05639832
02038357	_also_see	01590007
01322854	_derivationally_related_form	09884133
01270199	_derivationally_related_form	03648219
00169458	_verb_group	00550117
05820170	_derivationally_related_form	02677097
02689299	_derivationally_related_form	05088324
03057075	_derivationally_related_form	06789411
02675458	_derivationally_related_form	05010801
13447361	_synset_domain_topic_of	06084469
01719921	_derivationally_related_form	09840050
13408980	_hypernym	04747899
05010627	_hypernym	05009170
01279978	_derivationally_related_form	14436438
01167981	_derivationally_related_form	08253815
01593763	_derivationally_related_form	01173660
01533442	_derivationally_related_form	09927089
01533442	_verb_group	01532589
13905792	_derivationally_related_form	01277784
01144657	_verb_group	01143838
00505802	_hypernym	00299580
02730568	_derivationally_related_form	02339413
10178216	_derivationally_related_form	01405044
00310666	_derivationally_related_form	10718131
01930874	_synset_domain_topic_of	00298497
02047807	_derivationally_related_form	05070849
01826723	_derivationally_related_form	07511733
01020117	_synset_domain_topic_of	06277280
07642471	_hypernym	07597145
05003590	_derivationally_related_form	02748927
13878112	_derivationally_related_form	02046755
01475282	_also_see	01613463
06663940	_derivationally_related_form	00747135
02497400	_derivationally_related_form	00787832
00343249	_hypernym	00342028
10492202	_derivationally_related_form	01452918
05636402	_derivationally_related_form	10693459
01881180	_derivationally_related_form	09468237
00843128	_derivationally_related_form	01170052
06509210	_hypernym	06508816
08078020	_derivationally_related_form	10182499
02208903	_derivationally_related_form	15274863
08381820	_hypernym	08381636
14429985	_derivationally_related_form	00660102
01358023	_hypernym	00182406
01719921	_verb_group	01719302
04532106	_derivationally_related_form	00052043
01613463	_also_see	02451951
00433232	_derivationally_related_form	05068918
04366116	_has_part	04198797
02590910	_derivationally_related_form	10789118
07311661	_derivationally_related_form	02644050
01233027	_derivationally_related_form	07388987
13712592	_hypernym	13603305
00844994	_hypernym	00845523
04531098	_hypernym	03094503
00937208	_verb_group	00952841
05161150	_derivationally_related_form	00177186
01512259	_derivationally_related_form	00298497
05896733	_hypernym	05893653
00477941	_derivationally_related_form	04692157
02326695	_also_see	02451951
04795545	_hypernym	04794751
03364340	_derivationally_related_form	01904293
07375214	_derivationally_related_form	00144694
01951480	_derivationally_related_form	00121166
04848262	_derivationally_related_form	01826723
14561618	_derivationally_related_form	00092293
07386370	_hypernym	07371293
03082807	_has_part	03156405
00810557	_derivationally_related_form	00740712
06285090	_hypernym	07013736
10402086	_derivationally_related_form	06201136
01814396	_derivationally_related_form	04166553
01387786	_derivationally_related_form	00356790
01224517	_derivationally_related_form	00852922
09944022	_derivationally_related_form	08324514
00592795	_derivationally_related_form	10140314
15122231	_derivationally_related_form	00297906
00207728	_derivationally_related_form	14440623
01566490	_derivationally_related_form	00217773
05515287	_synset_domain_topic_of	01471682
00336539	_verb_group	00336260
02559199	_hypernym	02558951
08546183	_hypernym	08630039
15227846	_derivationally_related_form	02743112
01288052	_derivationally_related_form	03330947
00312553	_hypernym	00306426
10030277	_derivationally_related_form	01701311
00932324	_derivationally_related_form	06876144
10513120	_derivationally_related_form	01700934
09847727	_derivationally_related_form	01778990
00403149	_derivationally_related_form	11495041
07738353	_derivationally_related_form	01262936
01103614	_derivationally_related_form	01745722
00424869	_derivationally_related_form	07412092
00984609	_derivationally_related_form	02167571
10596899	_derivationally_related_form	01039330
03259505	_has_part	02821627
07884567	_hypernym	03248958
01332205	_hypernym	01296462
02708711	_hypernym	03574816
09225146	_synset_domain_topic_of	09376198
01686956	_derivationally_related_form	00900726
00867231	_hypernym	00992041
02215001	_derivationally_related_form	10785695
02517442	_hypernym	01428580
09701603	_hypernym	09701148
07881800	_derivationally_related_form	01170052
03541696	_derivationally_related_form	02652494
01149470	_derivationally_related_form	00430140
05925366	_hypernym	05923696
15256915	_synset_domain_topic_of	00455599
00468583	_verb_group	00468236
00750890	_hypernym	00749574
01098452	_derivationally_related_form	10512562
00212808	_derivationally_related_form	01474550
07556637	_derivationally_related_form	01167188
00976508	_also_see	01270175
00388635	_derivationally_related_form	10008716
15203229	_derivationally_related_form	02387910
03624966	_derivationally_related_form	01671039
13875571	_derivationally_related_form	01523986
02067889	_derivationally_related_form	14856263
00882961	_derivationally_related_form	02123672
07884567	_derivationally_related_form	01190494
09307300	_derivationally_related_form	00657016
10276045	_derivationally_related_form	01258828
01258828	_hypernym	01258302
00425905	_derivationally_related_form	00851933
00667942	_hypernym	00667424
06647206	_derivationally_related_form	01000214
00591519	_hypernym	00591115
10702781	_derivationally_related_form	00759694
01166926	_derivationally_related_form	01118081
00842989	_derivationally_related_form	09762385
03612814	_derivationally_related_form	00328128
00796976	_derivationally_related_form	00076341
02007417	_derivationally_related_form	00019131
06210363	_derivationally_related_form	02702120
11449907	_derivationally_related_form	00506040
00969137	_derivationally_related_form	04137444
00734927	_derivationally_related_form	15159819
01859221	_derivationally_related_form	01076046
00204439	_derivationally_related_form	02584097
00449295	_derivationally_related_form	00395797
06371267	_hypernym	06369829
00908099	_derivationally_related_form	05689249
10702781	_hypernym	10503452
09775663	_derivationally_related_form	00591236
14012667	_derivationally_related_form	02417504
06778102	_derivationally_related_form	00853633
09826074	_derivationally_related_form	01153486
01765178	_hypernym	01764800
15159819	_hypernym	15155220
01690294	_verb_group	01582645
00779374	_also_see	01837744
01798452	_hypernym	01797730
02991463	_derivationally_related_form	08337324
01612295	_verb_group	01524298
00144694	_hypernym	00144850
00217773	_derivationally_related_form	01566490
00945916	_hypernym	00945401
02852173	_hypernym	03665366
07458453	_hypernym	07456188
02685365	_hypernym	02773037
13905572	_derivationally_related_form	01985524
06947032	_derivationally_related_form	03003344
02611373	_derivationally_related_form	06210363
01918803	_derivationally_related_form	10645854
13497135	_derivationally_related_form	00156601
04447028	_hypernym	02881193
01364184	_synset_domain_topic_of	00243918
10769459	_hypernym	10479561
07376937	_derivationally_related_form	02175578
13910384	_hypernym	00027167
00285889	_derivationally_related_form	00490722
01180701	_hypernym	01180351
10789118	_derivationally_related_form	02590910
05069199	_derivationally_related_form	02037090
02677332	_derivationally_related_form	13793776
01696648	_derivationally_related_form	00161739
01533442	_derivationally_related_form	00251013
00611143	_derivationally_related_form	10249950
02717362	_derivationally_related_form	04123567
01606736	_derivationally_related_form	00814458
00048656	_derivationally_related_form	02006834
04767805	_hypernym	04767347
10224098	_derivationally_related_form	00105554
04995531	_hypernym	04995211
01087197	_derivationally_related_form	05635624
05088324	_derivationally_related_form	01376245
02679530	_derivationally_related_form	01216191
00363493	_derivationally_related_form	07368256
00276601	_derivationally_related_form	04904996
09906848	_derivationally_related_form	00590148
02527651	_derivationally_related_form	09879744
05625879	_hypernym	05625465
01133825	_derivationally_related_form	00123234
00897746	_verb_group	00784342
00435688	_verb_group	00125078
01503268	_derivationally_related_form	04463679
01475831	_derivationally_related_form	04666837
00608978	_derivationally_related_form	00073828
00798717	_derivationally_related_form	00205079
00596807	_derivationally_related_form	10467395
02839200	_hypernym	03546340
00930806	_derivationally_related_form	05916306
02377938	_derivationally_related_form	08236621
00274707	_derivationally_related_form	00282076
00365188	_derivationally_related_form	00375071
00492410	_derivationally_related_form	10451858
03282060	_hypernym	03792048
02583545	_hypernym	02543181
05123760	_hypernym	05123416
01163779	_derivationally_related_form	02483267
13342987	_hypernym	13342692
11495041	_derivationally_related_form	00403401
04898208	_derivationally_related_form	09923673
10012484	_derivationally_related_form	13523661
03419014	_has_part	04236377
10113362	_hypernym	10253995
00864159	_derivationally_related_form	06709692
07389569	_derivationally_related_form	02178866
01837744	_also_see	00779374
02478584	_derivationally_related_form	00231887
01848465	_verb_group	00613393
00443384	_verb_group	00443116
06716796	_derivationally_related_form	01800422
09217230	_hypernym	09287968
00755745	_derivationally_related_form	05944958
05798569	_derivationally_related_form	00663160
00273445	_derivationally_related_form	00947923
04531098	_has_part	02798574
10785695	_derivationally_related_form	02213690
00591519	_derivationally_related_form	01744111
02471327	_derivationally_related_form	10512201
00989602	_derivationally_related_form	06891022
10468559	_derivationally_related_form	15266265
00205543	_hypernym	00205079
01405044	_derivationally_related_form	00125629
04838210	_hypernym	04837232
00247792	_derivationally_related_form	00323856
00978369	_derivationally_related_form	07132415
00487874	_hypernym	00483935
02241767	_derivationally_related_form	09858299
03907654	_hypernym	03574555
07007945	_derivationally_related_form	01719921
00072989	_hypernym	00104868
14036539	_derivationally_related_form	00113818
06413889	_derivationally_related_form	02870092
03859958	_derivationally_related_form	02339413
00049197	_hypernym	00047945
02175578	_derivationally_related_form	07397955
08428019	_derivationally_related_form	02521816
14868243	_derivationally_related_form	00261533
11450566	_derivationally_related_form	00505802
01819554	_hypernym	01819147
02288295	_derivationally_related_form	13259917
01919391	_derivationally_related_form	00290579
07551052	_derivationally_related_form	00859604
00052500	_has_part	00281752
00335988	_derivationally_related_form	01884383
09283623	_derivationally_related_form	01913849
10760340	_hypernym	09923673
04248607	_hypernym	03925226
00050652	_derivationally_related_form	02539359
13259917	_derivationally_related_form	02288295
08310949	_hypernym	08077292
00945853	_hypernym	00946105
01253665	_derivationally_related_form	00799798
00407848	_derivationally_related_form	03953743
14818238	_derivationally_related_form	01657828
03654826	_hypernym	04359589
02462580	_verb_group	02461314
14687513	_hypernym	14875077
00735389	_hypernym	00734927
00869931	_hypernym	00842989
14010927	_derivationally_related_form	01859586
04267577	_hypernym	03976657
02653996	_derivationally_related_form	09889941
01468576	_derivationally_related_form	02972533
04216634	_hypernym	04332243
00595146	_derivationally_related_form	10280130
