# Supplementary material
Source: ML conference proceedings conference paper supplement (https://proceedings.neurips.cc/paper_files/paper/2021/hash/0fd600c953cde8121262e322ef09f70e-Abstract.html)
Supplement: Supplementary file 1 [file 0fd600c953cde8121262e322ef09f70e-Supplemental.zip › Supplementary_Material_Paper_8745/data/GraIL-BM_WN18RR_v4/test/test-graph.txt]

06729864	_derivationally_related_form	02275365
01568630	_derivationally_related_form	01079604
03156405	_hypernym	03003730
01166351	_verb_group	01168468
10599806	_derivationally_related_form	01067816
03881534	_hypernym	03141065
03138344	_hypernym	03659292
00043902	_derivationally_related_form	01405044
09612131	_derivationally_related_form	00869596
02693319	_derivationally_related_form	08573472
03386011	_derivationally_related_form	02023992
09927089	_hypernym	10241300
07020895	_derivationally_related_form	10339966
02049190	_hypernym	01907258
00937208	_derivationally_related_form	10692696
01606205	_derivationally_related_form	03385557
03145843	_has_part	03315805
02492362	_derivationally_related_form	00429048
07959016	_derivationally_related_form	02378183
05916306	_derivationally_related_form	00930806
00755447	_hypernym	00752764
01133281	_derivationally_related_form	02443049
10718131	_derivationally_related_form	01845229
02711114	_derivationally_related_form	03285912
00953216	_derivationally_related_form	07222823
01484392	_hypernym	00144850
00752493	_also_see	01469770
13523661	_derivationally_related_form	03002351
03141065	_hypernym	02958343
14361664	_hypernym	14360459
01317723	_derivationally_related_form	10575787
01532589	_verb_group	02741960
00716531	_hypernym	00632236
10070711	_derivationally_related_form	02141973
01410223	_derivationally_related_form	00125629
02848523	_hypernym	04110955
01406684	_derivationally_related_form	09334396
07186148	_derivationally_related_form	01469770
09287968	_synset_domain_topic_of	06115701
04565375	_derivationally_related_form	02334867
00082870	_derivationally_related_form	02381726
13858604	_hypernym	13854649
07255401	_hypernym	07255174
06542047	_derivationally_related_form	02493666
01235463	_derivationally_related_form	01153947
00916706	_derivationally_related_form	04736757
08558488	_derivationally_related_form	10472799
02700867	_derivationally_related_form	03094503
13446197	_derivationally_related_form	00136800
01354006	_derivationally_related_form	14705718
02379198	_derivationally_related_form	00205079
02431320	_derivationally_related_form	01201429
01123887	_derivationally_related_form	00977301
08524735	_has_part	08571139
01711445	_derivationally_related_form	00521562
00616153	_derivationally_related_form	10351625
00015806	_hypernym	00014742
00088532	_derivationally_related_form	14018567
10718131	_derivationally_related_form	00310666
10176679	_hypernym	10241300
04552696	_hypernym	03764276
04576971	_hypernym	03736970
08008017	_derivationally_related_form	01482449
01589224	_derivationally_related_form	13911872
02180797	_also_see	01934554
03024746	_derivationally_related_form	01570562
13948136	_hypernym	13945919
00323856	_derivationally_related_form	07588947
02384858	_derivationally_related_form	01086103
13321495	_hypernym	13320168
01072262	_derivationally_related_form	01168569
02611373	_also_see	01116585
06722186	_derivationally_related_form	00201407
05036394	_derivationally_related_form	00227165
00854904	_derivationally_related_form	09921409
02834778	_has_part	03903424
03032811	_derivationally_related_form	01858910
10695450	_hypernym	09991530
09961999	_derivationally_related_form	07133701
01875295	_verb_group	01876028
09847727	_derivationally_related_form	02613275
06561942	_hypernym	06559365
00259177	_derivationally_related_form	00199912
01711445	_derivationally_related_form	04296562
02838014	_hypernym	08511241
09376198	_hypernym	09225146
01437254	_derivationally_related_form	00121166
05527216	_has_part	05526175
15274441	_derivationally_related_form	00156276
07517550	_derivationally_related_form	01789270
01884577	_derivationally_related_form	09213828
01156115	_derivationally_related_form	00430140
01003729	_derivationally_related_form	01614079
14543231	_hypernym	14541044
02022486	_hypernym	02087156
10645611	_hypernym	10676877
00548326	_derivationally_related_form	02744977
07319652	_hypernym	07317764
09826204	_derivationally_related_form	05635188
05623628	_derivationally_related_form	02527085
02275365	_derivationally_related_form	06729864
15169873	_has_part	15170504
02237338	_derivationally_related_form	06634095
04334599	_hypernym	04426618
07890068	_hypernym	07889510
01004072	_derivationally_related_form	02032415
01049685	_derivationally_related_form	02147603
10003283	_hypernym	09615465
01882814	_derivationally_related_form	00284409
05623628	_derivationally_related_form	02741149
04953954	_derivationally_related_form	01119421
01123887	_verb_group	01209135
00047945	_derivationally_related_form	10033082
02463990	_derivationally_related_form	10564800
06277280	_has_part	06278136
02208537	_derivationally_related_form	10700201
06732350	_hypernym	06729499
10634075	_hypernym	10118844
00044149	_verb_group	00044797
05046471	_hypernym	05046009
10760340	_derivationally_related_form	02461314
03420559	_derivationally_related_form	01087197
07695965	_hypernym	07712382
01166258	_derivationally_related_form	00161987
02191766	_synset_domain_topic_of	00243918
01264283	_derivationally_related_form	03058107
08890097	_has_part	08954057
02902250	_hypernym	03264136
01958615	_derivationally_related_form	00450335
10285135	_hypernym	09807754
05674584	_hypernym	05669934
02076999	_derivationally_related_form	00116687
02886599	_hypernym	04341414
00282076	_derivationally_related_form	00274707
02361600	_derivationally_related_form	03264136
00044353	_derivationally_related_form	14482620
00804802	_derivationally_related_form	07181546
01484982	_derivationally_related_form	14890659
02846322	_derivationally_related_form	07560903
09605289	_has_part	05219561
07578363	_derivationally_related_form	01181295
06277280	_has_part	06277803
01671039	_derivationally_related_form	03624966
02136271	_derivationally_related_form	02009280
02461314	_also_see	02473688
03210940	_derivationally_related_form	01688771
14464203	_derivationally_related_form	00263044
00958823	_derivationally_related_form	01021579
02191766	_derivationally_related_form	05715864
00350380	_derivationally_related_form	02033805
00222248	_hypernym	00219012
01097031	_derivationally_related_form	05640184
15277730	_hypernym	15286249
02421374	_derivationally_related_form	13996061
01039330	_derivationally_related_form	10597505
02673134	_verb_group	01602318
00395797	_derivationally_related_form	00073343
01719302	_verb_group	01719921
00884466	_has_part	00889472
02159955	_hypernym	01767661
02409941	_hypernym	02409412
13898315	_derivationally_related_form	02371718
00968211	_derivationally_related_form	06254007
00897026	_synset_domain_topic_of	06892775
14738752	_derivationally_related_form	00458471
07396658	_derivationally_related_form	02185373
04384016	_has_part	04530283
02291708	_synset_domain_topic_of	13333237
00115500	_derivationally_related_form	01452918
15287830	_hypernym	15269513
05960464	_derivationally_related_form	00963283
01036319	_derivationally_related_form	14543931
01414288	_derivationally_related_form	07410021
09213828	_derivationally_related_form	02035425
14705718	_derivationally_related_form	01269008
00604930	_derivationally_related_form	10680153
06711855	_derivationally_related_form	00824767
06892016	_derivationally_related_form	01719921
04463273	_hypernym	03234306
00636461	_derivationally_related_form	00786816
04437953	_has_part	04436675
10345015	_hypernym	10142747
08612049	_derivationally_related_form	02043982
02235229	_derivationally_related_form	00213052
02363128	_derivationally_related_form	03497657
02273293	_derivationally_related_form	00085219
07196075	_hypernym	07193958
01989053	_derivationally_related_form	07361416
02045790	_derivationally_related_form	00342028
01950502	_derivationally_related_form	02792552
01451842	_verb_group	01941093
00614057	_derivationally_related_form	07534108
02534492	_derivationally_related_form	10674130
14597158	_derivationally_related_form	01540449
01477538	_derivationally_related_form	02851099
02765464	_derivationally_related_form	00006336
04183329	_hypernym	03094503
00074790	_derivationally_related_form	00013172
09758885	_hypernym	09770949
02001858	_hypernym	02000868
09769345	_derivationally_related_form	00990655
01952750	_derivationally_related_form	08616311
13935227	_derivationally_related_form	00796588
08675967	_hypernym	08574314
01059719	_derivationally_related_form	02338386
13354985	_hypernym	06516595
02586619	_derivationally_related_form	10140314
07375635	_derivationally_related_form	02014165
02542280	_derivationally_related_form	04641153
14012667	_derivationally_related_form	02725067
03451473	_derivationally_related_form	00295697
05696020	_hypernym	05695806
05088324	_derivationally_related_form	02060141
10162507	_derivationally_related_form	01454810
00467717	_derivationally_related_form	13373214
00753685	_derivationally_related_form	02577586
00043683	_verb_group	00046534
01849221	_also_see	01970348
00037919	_derivationally_related_form	00427853
00121166	_derivationally_related_form	01951480
08571139	_hypernym	08523483
05826291	_derivationally_related_form	00667224
07339098	_derivationally_related_form	01864865
15159819	_derivationally_related_form	00734927
00861560	_derivationally_related_form	01266491
04993413	_synset_domain_topic_of	14589223
10479561	_derivationally_related_form	02268351
02339413	_derivationally_related_form	03730153
00834009	_derivationally_related_form	10322391
00718573	_hypernym	00712225
00658052	_derivationally_related_form	01009871
02218635	_derivationally_related_form	13358549
00329831	_derivationally_related_form	02994858
02038357	_also_see	01909397
05822612	_hypernym	05821775
01457954	_derivationally_related_form	13534954
06855207	_derivationally_related_form	01531265
01484392	_derivationally_related_form	02919414
10193026	_derivationally_related_form	01144657
06884790	_hypernym	06883073
00993014	_derivationally_related_form	10801291
02087551	_derivationally_related_form	02003601
14409718	_hypernym	14409489
02992070	_derivationally_related_form	05125377
14442530	_derivationally_related_form	02646931
00926668	_derivationally_related_form	01459896
07896994	_hypernym	07891726
01189427	_hypernym	01196037
10338707	_hypernym	10231087
02007417	_derivationally_related_form	00236581
10467179	_hypernym	10164747
00051511	_hypernym	00047945
10692482	_derivationally_related_form	01195299
14427065	_derivationally_related_form	09917593
00964105	_instance_hypernym	00962129
01643464	_derivationally_related_form	07003119
00953058	_derivationally_related_form	07222823
04995531	_derivationally_related_form	00133417
00462092	_derivationally_related_form	01079604
10037385	_derivationally_related_form	01190277
09942970	_hypernym	10317007
08220714	_hypernym	08077292
01073995	_derivationally_related_form	02451912
11450869	_hypernym	11499284
01945516	_hypernym	01944692
00174379	_also_see	01918984
00467719	_hypernym	00464651
04097866	_derivationally_related_form	00052043
14420464	_derivationally_related_form	01220885
00808182	_derivationally_related_form	00235368
01021579	_derivationally_related_form	00350461
06410904	_has_part	06345131
09993252	_derivationally_related_form	02011685
00708017	_derivationally_related_form	00434374
07205573	_hypernym	07204401
13898315	_derivationally_related_form	00552619
15277730	_derivationally_related_form	02743727
05084201	_hypernym	05083328
01094086	_hypernym	01086103
00841986	_derivationally_related_form	13555775
10720097	_derivationally_related_form	02001858
00908133	_derivationally_related_form	01002740
02124332	_derivationally_related_form	05713737
00036178	_hypernym	00035758
10760340	_derivationally_related_form	02400760
01196802	_hypernym	01168468
05245192	_hypernym	05244934
01054186	_derivationally_related_form	07118747
02033295	_derivationally_related_form	08681222
04650201	_derivationally_related_form	01264336
00219575	_derivationally_related_form	00358431
00663160	_derivationally_related_form	09761403
00622584	_hypernym	00620752
01003049	_derivationally_related_form	03708036
07387509	_derivationally_related_form	02172888
01675963	_derivationally_related_form	00262249
00973056	_derivationally_related_form	06255354
10763383	_derivationally_related_form	01181295
03916470	_hypernym	03916031
00780148	_derivationally_related_form	01104624
02296984	_derivationally_related_form	06791372
02124748	_derivationally_related_form	00882961
02738701	_derivationally_related_form	05072663
01505254	_derivationally_related_form	04019696
00044149	_derivationally_related_form	03859958
00841986	_derivationally_related_form	14854581
06216160	_hypernym	06212839
13827426	_hypernym	05074774
00427397	_derivationally_related_form	00230172
01935476	_derivationally_related_form	00451370
02137132	_also_see	02141973
01637633	_derivationally_related_form	09993901
01085474	_derivationally_related_form	04181228
02430580	_derivationally_related_form	00385501
00830257	_derivationally_related_form	00047745
01988080	_derivationally_related_form	13910384
00956405	_hypernym	00839834
00658052	_derivationally_related_form	01010334
05018103	_derivationally_related_form	00291873
04027023	_hypernym	04372370
02419773	_derivationally_related_form	00620752
05125377	_derivationally_related_form	02992070
00525453	_also_see	01101391
02958343	_hypernym	03791235
01679433	_verb_group	01364184
05524615	_hypernym	05524430
01190012	_derivationally_related_form	07561112
08894456	_derivationally_related_form	03130073
02146790	_derivationally_related_form	01048912
04594489	_derivationally_related_form	02354536
14708720	_hypernym	14940386
00490968	_derivationally_related_form	04438304
07006119	_derivationally_related_form	03005423
05800611	_derivationally_related_form	00788564
07488340	_hypernym	07487955
02725067	_derivationally_related_form	14013005
00121166	_derivationally_related_form	01437254
03859958	_derivationally_related_form	02340360
00236592	_derivationally_related_form	01146039
05018934	_derivationally_related_form	00173764
04098513	_hypernym	04359589
01138911	_derivationally_related_form	00430140
01356750	_derivationally_related_form	04935528
02766687	_derivationally_related_form	07412310
08477634	_derivationally_related_form	14425715
00058743	_derivationally_related_form	02074677
05635188	_derivationally_related_form	01941093
10298912	_derivationally_related_form	00589769
03640660	_hypernym	03899328
13720600	_hypernym	13716084
04229195	_hypernym	03900509
07066659	_synset_domain_topic_of	07020895
08620763	_hypernym	08620061
01134479	_derivationally_related_form	02438861
05058580	_hypernym	05044528
03257586	_hypernym	02727825
06428976	_hypernym	06428792
01016002	_hypernym	01016778
00371264	_derivationally_related_form	11466043
13344804	_hypernym	13344071
00276883	_derivationally_related_form	08456993
08873622	_has_part	08874273
06520944	_derivationally_related_form	02409941
10535706	_hypernym	09772029
01229631	_derivationally_related_form	14526182
05800998	_derivationally_related_form	02458747
01155421	_derivationally_related_form	03420559
05826291	_derivationally_related_form	00664788
05938795	_hypernym	05925366
10054657	_derivationally_related_form	02409412
00535452	_similar_to	00536655
04904851	_hypernym	04904664
10404998	_derivationally_related_form	01332205
13740765	_hypernym	13740168
00504019	_derivationally_related_form	00842281
00922867	_derivationally_related_form	05816790
02402825	_hypernym	02404224
00785008	_derivationally_related_form	07196682
01156899	_derivationally_related_form	01087197
08654360	_hypernym	08491826
13450636	_derivationally_related_form	02672859
03471779	_derivationally_related_form	00271520
00601822	_derivationally_related_form	00180770
05125377	_derivationally_related_form	02527085
02460619	_derivationally_related_form	10700201
03432129	_hypernym	03736970
10055566	_derivationally_related_form	05985999
04181228	_derivationally_related_form	01085474
03520811	_derivationally_related_form	01763813
00796047	_derivationally_related_form	07006119
04494204	_has_part	02714315
00669762	_verb_group	02109045
00669762	_derivationally_related_form	01166926
01940403	_derivationally_related_form	00302394
00749991	_derivationally_related_form	02537812
10583387	_derivationally_related_form	08374049
01531265	_derivationally_related_form	03626115
01930482	_verb_group	01930117
02014165	_derivationally_related_form	07375635
00406365	_hypernym	00404403
00306426	_derivationally_related_form	01846916
00187526	_derivationally_related_form	06473381
13761966	_derivationally_related_form	01376245
00156101	_derivationally_related_form	05167237
01010458	_derivationally_related_form	02406585
01986367	_member_meronym	01986538
03817647	_derivationally_related_form	01283208
06539770	_derivationally_related_form	01027508
06210363	_derivationally_related_form	00670991
05695232	_derivationally_related_form	02577877
00788184	_hypernym	00897746
00988287	_derivationally_related_form	07290278
03963294	_derivationally_related_form	01738347
11675842	_hypernym	13087625
00052672	_derivationally_related_form	14702416
06777687	_hypernym	06776138
02194138	_hypernym	02191766
00235110	_verb_group	00318326
02147603	_hypernym	02158587
03792334	_derivationally_related_form	01660640
10070563	_derivationally_related_form	02148788
08652970	_hypernym	08497294
04495843	_derivationally_related_form	01454431
00505802	_derivationally_related_form	04594489
06716234	_derivationally_related_form	00849080
03814906	_has_part	03908831
00963283	_similar_to	00962634
02379198	_derivationally_related_form	07254594
00973056	_derivationally_related_form	06254007
00562935	_hypernym	00562280
03137579	_hypernym	02886599
00793580	_derivationally_related_form	07186148
14578104	_derivationally_related_form	00219012
00295701	_derivationally_related_form	01845720
03132438	_derivationally_related_form	01286290
00388635	_derivationally_related_form	14445226
13342692	_hypernym	13333237
07710616	_has_part	07711471
03328201	_hypernym	03391770
00809654	_derivationally_related_form	00741685
00807461	_hypernym	00807178
02421921	_verb_group	02099829
02984104	_derivationally_related_form	10468559
08286163	_member_meronym	08282696
02463704	_derivationally_related_form	00741478
10562749	_derivationally_related_form	02167571
03211117	_has_part	04054795
13248393	_derivationally_related_form	02208903
01026095	_derivationally_related_form	05763412
07254267	_derivationally_related_form	02367032
05674584	_derivationally_related_form	00407848
00785008	_hypernym	00897746
00815801	_hypernym	00815320
09810364	_derivationally_related_form	02275365
13411157	_derivationally_related_form	00697062
01921772	_hypernym	01923909
13752679	_hypernym	13745420
00590626	_derivationally_related_form	09941571
02091885	_derivationally_related_form	07383823
02718015	_derivationally_related_form	13291189
03508101	_derivationally_related_form	02333358
01098452	_derivationally_related_form	01263711
04692908	_derivationally_related_form	00336539
02964634	_derivationally_related_form	02701210
02070466	_derivationally_related_form	09448361
08008017	_derivationally_related_form	01487008
05710210	_derivationally_related_form	01744111
09977660	_derivationally_related_form	02480923
02807731	_has_part	02808440
00133338	_derivationally_related_form	01238640
05197797	_hypernym	05196582
02192992	_derivationally_related_form	05715283
01263257	_derivationally_related_form	02033295
06629858	_hypernym	06629392
13876371	_derivationally_related_form	02738544
00877327	_derivationally_related_form	05797597
00745499	_derivationally_related_form	06529219
07009421	_derivationally_related_form	00902289
00436404	_derivationally_related_form	00195569
14442530	_hypernym	14441825
01843364	_hypernym	01843055
00386392	_derivationally_related_form	00524530
10381369	_derivationally_related_form	00480969
09307300	_derivationally_related_form	01385920
00506658	_derivationally_related_form	01155687
00858849	_derivationally_related_form	00015303
02089984	_verb_group	01907258
02381397	_hypernym	02383842
00746479	_derivationally_related_form	07330007
01173038	_hypernym	00349369
01406512	_derivationally_related_form	00129089
13423922	_derivationally_related_form	01539063
04939324	_derivationally_related_form	00708017
05750163	_hypernym	05749619
02155493	_derivationally_related_form	05820620
01631072	_derivationally_related_form	00269963
07621618	_hypernym	03169390
02437465	_verb_group	00711932
00542809	_hypernym	01664172
01053920	_derivationally_related_form	02637202
01165290	_hypernym	00273445
04490091	_has_part	04105438
10641223	_hypernym	09917593
00143204	_derivationally_related_form	13875970
07411645	_derivationally_related_form	02159890
02575082	_derivationally_related_form	00754767
05238282	_derivationally_related_form	01309478
02018524	_derivationally_related_form	10213652
02636516	_verb_group	02717102
00075618	_derivationally_related_form	02527651
01052248	_derivationally_related_form	05714466
02208903	_derivationally_related_form	06523132
02543181	_hypernym	00797430
02125409	_derivationally_related_form	02648639
01755504	_verb_group	00276068
07847198	_derivationally_related_form	01418037
08276720	_derivationally_related_form	02792903
13934900	_derivationally_related_form	00136800
07557434	_has_part	07809096
00357275	_derivationally_related_form	01592456
02544348	_derivationally_related_form	10119200
10684630	_derivationally_related_form	00605783
00213052	_hypernym	00212808
02461314	_derivationally_related_form	05186306
07120524	_hypernym	07109847
01522052	_derivationally_related_form	10781984
00667224	_derivationally_related_form	05826291
05798569	_derivationally_related_form	02520997
05070032	_hypernym	05064037
02839200	_derivationally_related_form	02653159
01356370	_hypernym	01296462
13905792	_derivationally_related_form	01278427
00212049	_synset_domain_topic_of	00243918
00632236	_derivationally_related_form	06753800
02043982	_derivationally_related_form	04137444
02530003	_hypernym	02528380
04782116	_hypernym	04779649
03619650	_derivationally_related_form	02341200
00231567	_derivationally_related_form	02544191
10532576	_derivationally_related_form	00018158
00089027	_derivationally_related_form	02272549
02806261	_derivationally_related_form	00665886
00330160	_derivationally_related_form	02055649
02084071	_hypernym	01317541
00858849	_hypernym	00858188
07240549	_derivationally_related_form	00594146
01688771	_derivationally_related_form	00900726
02019716	_hypernym	02016523
00146572	_derivationally_related_form	02032634
10330189	_derivationally_related_form	02269894
02226172	_hypernym	02339413
02694933	_derivationally_related_form	08622950
02999410	_hypernym	03664943
02576921	_derivationally_related_form	10089615
10009276	_hypernym	10448983
01511706	_derivationally_related_form	04011827
00780575	_similar_to	00779374
14739360	_hypernym	14607521
02493260	_derivationally_related_form	10536897
02763740	_derivationally_related_form	11428023
10618848	_derivationally_related_form	00298041
09780828	_derivationally_related_form	02441022
06255354	_derivationally_related_form	00973728
01252601	_derivationally_related_form	04694441
03137228	_hypernym	03899328
02594102	_derivationally_related_form	14483917
00164152	_derivationally_related_form	02396205
01532434	_verb_group	01533442
02484208	_derivationally_related_form	00220522
06891022	_derivationally_related_form	02148788
10272171	_hypernym	09886010
00990249	_derivationally_related_form	07242912
00262743	_hypernym	00262249
00159899	_derivationally_related_form	00880227
02194286	_derivationally_related_form	00882702
00949093	_hypernym	00948853
00753428	_derivationally_related_form	06513366
04359589	_derivationally_related_form	01217043
00458471	_verb_group	00458754
00963241	_derivationally_related_form	00963283
06892016	_hypernym	06891493
00774344	_derivationally_related_form	01176431
02654686	_hypernym	02654416
10070563	_hypernym	10593745
00648224	_derivationally_related_form	10575787
00618267	_hypernym	00618451
01354006	_verb_group	01353405
01017738	_also_see	02274253
04735929	_derivationally_related_form	00916706
02932019	_hypernym	03079741
05525252	_hypernym	05513302
01985524	_derivationally_related_form	13905572
02357228	_derivationally_related_form	10044470
01849746	_hypernym	01849221
01264050	_derivationally_related_form	00877083
03002351	_derivationally_related_form	07570720
13480848	_derivationally_related_form	02356420
06256229	_hypernym	06255777
00430140	_derivationally_related_form	01138911
00854904	_hypernym	00854420
09349648	_hypernym	13867641
02431320	_derivationally_related_form	00386676
00736216	_derivationally_related_form	02708711
05079638	_derivationally_related_form	01233347
02405252	_hypernym	02401809
00456596	_derivationally_related_form	05696020
14204950	_derivationally_related_form	10011074
02985137	_has_part	04152593
00446885	_synset_domain_topic_of	06084469
06999233	_hypernym	06998748
01965156	_derivationally_related_form	05086740
14405931	_derivationally_related_form	01785748
01239619	_derivationally_related_form	07338681
01592774	_verb_group	01592456
02333358	_derivationally_related_form	05016171
04592741	_has_part	04087126
00291873	_derivationally_related_form	11473954
01950502	_synset_domain_topic_of	00815801
09433442	_synset_domain_topic_of	09376198
01840238	_verb_group	01941093
01376245	_derivationally_related_form	13761966
10155849	_hypernym	09974648
02579447	_derivationally_related_form	04850996
02575723	_derivationally_related_form	10463714
01912159	_derivationally_related_form	03137228
01079480	_derivationally_related_form	15256915
04821451	_hypernym	04820258
15272029	_derivationally_related_form	01859586
07221756	_derivationally_related_form	00953216
14854262	_hypernym	14853947
09975425	_derivationally_related_form	01658762
00262596	_hypernym	00262249
06558088	_hypernym	06539502
00753881	_verb_group	00792471
01169194	_derivationally_related_form	00083809
02370806	_has_part	02462828
07397761	_hypernym	07371293
01014821	_derivationally_related_form	10786270
03386011	_hypernym	03171356
02913152	_has_part	03509025
02125409	_derivationally_related_form	01053920
10769459	_derivationally_related_form	01158181
01222884	_also_see	02180797
00797299	_derivationally_related_form	10037385
00798717	_hypernym	00757544
01564144	_derivationally_related_form	00217014
00868591	_hypernym	00793580
01969216	_derivationally_related_form	07445480
13887509	_derivationally_related_form	02044866
05725527	_hypernym	05725378
13254805	_hypernym	13331198
13366311	_derivationally_related_form	01184625
03546340	_derivationally_related_form	02459173
00946755	_derivationally_related_form	06481320
01497736	_also_see	02164402
10248876	_derivationally_related_form	00031820
01432601	_derivationally_related_form	09897696
09702134	_hypernym	09701148
01592072	_derivationally_related_form	00335988
15143276	_derivationally_related_form	02109818
01025913	_derivationally_related_form	04660261
00208797	_derivationally_related_form	02401809
03419014	_has_part	03814112
14526182	_derivationally_related_form	02110552
10224098	_derivationally_related_form	06778102
13720600	_has_part	13720096
01739814	_hypernym	01742726
00384802	_derivationally_related_form	02430580
02190166	_derivationally_related_form	01940403
10380672	_derivationally_related_form	06170498
01076488	_derivationally_related_form	00908099
10193026	_derivationally_related_form	02003601
09779790	_derivationally_related_form	01739814
07009538	_derivationally_related_form	07007945
13998781	_derivationally_related_form	01301410
02525312	_derivationally_related_form	00189565
00804802	_derivationally_related_form	10018021
01689752	_derivationally_related_form	05064037
06177033	_hypernym	06094774
00464894	_hypernym	00464651
02311387	_derivationally_related_form	10032342
00208943	_derivationally_related_form	02405252
10491309	_derivationally_related_form	01745722
05008943	_derivationally_related_form	01484987
01352067	_derivationally_related_form	04837931
02395115	_derivationally_related_form	05658226
01505254	_derivationally_related_form	06615561
02653159	_derivationally_related_form	02839200
14940100	_derivationally_related_form	00444309
02672540	_hypernym	02673134
08612786	_hypernym	08512259
00046534	_derivationally_related_form	10033082
01542207	_derivationally_related_form	00329619
00009631	_verb_group	01891817
06781383	_hypernym	06780882
02587084	_derivationally_related_form	06663940
07290278	_derivationally_related_form	00988287
00882702	_derivationally_related_form	02194495
10564800	_derivationally_related_form	02463990
04865722	_derivationally_related_form	00600370
02887741	_derivationally_related_form	01428853
15152817	_has_part	15153472
07006119	_derivationally_related_form	02813315
06397307	_hypernym	06392001
02156546	_derivationally_related_form	00230172
02829696	_derivationally_related_form	00362128
04248607	_derivationally_related_form	01003249
13960464	_derivationally_related_form	02576921
06841365	_derivationally_related_form	00190023
06767922	_derivationally_related_form	00850192
08873622	_has_part	04460947
04082886	_hypernym	03820950
01309478	_derivationally_related_form	05238282
01756719	_derivationally_related_form	07009946
02449340	_derivationally_related_form	04211528
02717701	_derivationally_related_form	13905572
09927089	_derivationally_related_form	01532589
07859583	_hypernym	07858595
04134339	_hypernym	03964744
01985757	_derivationally_related_form	13905572
07441619	_derivationally_related_form	01866610
02711114	_derivationally_related_form	13998576
01328705	_derivationally_related_form	00379422
00605310	_derivationally_related_form	10118382
02074677	_derivationally_related_form	00060201
06312966	_synset_domain_topic_of	06174404
05728678	_derivationally_related_form	00709625
01224744	_derivationally_related_form	00409211
01935476	_derivationally_related_form	03903424
01087178	_hypernym	01086945
06776138	_derivationally_related_form	10191943
08000304	_hypernym	07999699
14589223	_hypernym	14586258
05896733	_derivationally_related_form	02117649
07411645	_derivationally_related_form	02767760
00515154	_derivationally_related_form	08065937
02903204	_derivationally_related_form	01501184
00711932	_verb_group	02437465
00459296	_derivationally_related_form	00555648
00956250	_derivationally_related_form	05817845
06589574	_has_part	06998748
02275365	_hypernym	00752764
03648066	_hypernym	04602044
02222318	_derivationally_related_form	00091234
03287733	_has_part	03431745
01856626	_derivationally_related_form	01123095
10583387	_derivationally_related_form	08499840
00572489	_derivationally_related_form	01512259
02742842	_derivationally_related_form	00255710
03450516	_derivationally_related_form	00052043
01886407	_also_see	02094755
15255804	_has_part	15256022
14061805	_derivationally_related_form	02541302
02708711	_derivationally_related_form	00736216
00348008	_derivationally_related_form	01924882
05725527	_derivationally_related_form	00371264
05086740	_derivationally_related_form	01963942
00193486	_derivationally_related_form	05870180
00998399	_derivationally_related_form	04391838
00582868	_derivationally_related_form	00600370
01077350	_hypernym	01073995
00903559	_hypernym	00900375
01042725	_derivationally_related_form	02761834
00367976	_derivationally_related_form	02082690
01073822	_derivationally_related_form	15010703
00293141	_derivationally_related_form	04683814
10597505	_derivationally_related_form	01039330
01076793	_also_see	02531422
00325110	_hypernym	00324384
01781983	_hypernym	01780941
14371161	_derivationally_related_form	00594146
10117267	_derivationally_related_form	06778102
03714721	_derivationally_related_form	00452512
06843520	_derivationally_related_form	01589224
02098458	_hypernym	02035919
09444100	_hypernym	09239740
05238282	_has_part	05240211
02984104	_derivationally_related_form	10467179
02033295	_hypernym	01907258
03530910	_derivationally_related_form	01337224
01222884	_also_see	01227137
02635189	_derivationally_related_form	05780885
10575787	_derivationally_related_form	02240881
00195569	_derivationally_related_form	00436404
03876519	_derivationally_related_form	01684899
02755352	_derivationally_related_form	01290422
07436352	_derivationally_related_form	00459498
03471030	_derivationally_related_form	01516290
00850501	_derivationally_related_form	00425905
13754293	_derivationally_related_form	00156601
02672371	_hypernym	03679384
00510364	_derivationally_related_form	04682462
05850823	_derivationally_related_form	01505254
04384016	_has_part	03536568
01161635	_derivationally_related_form	14562324
10162507	_hypernym	09960688
10197967	_hypernym	09626031
00513401	_hypernym	00512843
00140967	_derivationally_related_form	07358060
00321148	_verb_group	00320681
01170052	_derivationally_related_form	07885223
01412548	_hypernym	01398919
01431230	_derivationally_related_form	10237196
10599806	_hypernym	10340312
01800422	_hypernym	01799794
00802238	_derivationally_related_form	02545578
09873604	_hypernym	10498551
01887020	_derivationally_related_form	07441619
00659535	_hypernym	00658052
05514905	_has_part	05525252
02067889	_derivationally_related_form	07407272
04879658	_derivationally_related_form	00963283
07254836	_hypernym	07254594
03259505	_has_part	03319745
07181935	_derivationally_related_form	00775156
06387980	_has_part	06399995
08620763	_derivationally_related_form	01466978
00741478	_derivationally_related_form	02463704
01580928	_derivationally_related_form	05246511
13411157	_hypernym	13405962
00135285	_derivationally_related_form	06880664
04393095	_derivationally_related_form	00999270
02586619	_derivationally_related_form	01124794
02834778	_has_part	03616428
00880227	_derivationally_related_form	06695579
10011902	_hypernym	10541229
10022759	_derivationally_related_form	02575723
00796392	_derivationally_related_form	07255401
00786458	_verb_group	00669970
01917980	_derivationally_related_form	00284101
00843468	_derivationally_related_form	07234230
01115585	_derivationally_related_form	10679998
03473465	_has_part	03473227
08617963	_derivationally_related_form	02021376
09889691	_derivationally_related_form	01094086
00960851	_derivationally_related_form	01115916
00650016	_derivationally_related_form	10012815
02196214	_derivationally_related_form	05717342
00665886	_derivationally_related_form	00154433
05521111	_has_part	05512670
01532589	_verb_group	01533442
02381726	_derivationally_related_form	00082870
00784388	_derivationally_related_form	09858299
10242791	_hypernym	10083823
09889691	_hypernym	10450303
09626238	_derivationally_related_form	00889831
02515080	_derivationally_related_form	09977660
02066304	_hypernym	02064887
04695176	_derivationally_related_form	00281101
02829696	_derivationally_related_form	02033295
09906986	_hypernym	10164747
03813834	_hypernym	04213626
02333358	_derivationally_related_form	05725527
01745722	_derivationally_related_form	06589574
14821043	_hypernym	14580897
01031256	_derivationally_related_form	06796119
02876088	_derivationally_related_form	01903756
04111190	_hypernym	04100174
03548626	_has_part	04087126
00501479	_hypernym	00499066
00136800	_synset_domain_topic_of	06084469
02417504	_derivationally_related_form	10197967
04605726	_derivationally_related_form	01580467
03731164	_hypernym	03872495
02541302	_also_see	01017738
01186428	_derivationally_related_form	10345100
05058140	_derivationally_related_form	02055975
08647616	_derivationally_related_form	02701962
00499066	_hypernym	00455599
10176111	_derivationally_related_form	01920932
09700964	_hypernym	09686536
02534761	_derivationally_related_form	07188685
02519148	_hypernym	02517442
00269963	_derivationally_related_form	00167824
00828559	_derivationally_related_form	00043683
01230283	_derivationally_related_form	01097960
01186428	_derivationally_related_form	01058870
07696527	_hypernym	07695965
10674130	_derivationally_related_form	02534936
00754280	_derivationally_related_form	02288656
09048460	_hypernym	08574314
01945516	_synset_domain_topic_of	00815801
08121867	_hypernym	08119821
01118081	_derivationally_related_form	01166926
05731779	_derivationally_related_form	02025009
00442669	_derivationally_related_form	13451508
00136800	_derivationally_related_form	13934900
00342028	_derivationally_related_form	02045790
00918580	_derivationally_related_form	00506658
01054186	_derivationally_related_form	07384898
05924920	_derivationally_related_form	00467717
00801782	_hypernym	00800930
01958615	_derivationally_related_form	00299217
01166926	_derivationally_related_form	00669762
11447851	_derivationally_related_form	01902783
00504019	_derivationally_related_form	00357275
01711965	_hypernym	01000214
15256915	_has_part	15258450
04565375	_hypernym	03574816
07338681	_derivationally_related_form	01239619
06404582	_derivationally_related_form	00996485
02701445	_hypernym	02732798
07132415	_derivationally_related_form	00978549
08143486	_hypernym	08077292
01821634	_hypernym	01809064
01129201	_verb_group	02687916
05774614	_derivationally_related_form	00944924
01083645	_derivationally_related_form	02469085
02148788	_derivationally_related_form	06888345
00047945	_derivationally_related_form	02742322
01328705	_derivationally_related_form	02671421
05748054	_derivationally_related_form	02193765
07406765	_hypernym	07405893
07167415	_derivationally_related_form	02148788
13903387	_hypernym	13903079
08374049	_member_meronym	09937688
05713737	_derivationally_related_form	02123672
02531625	_derivationally_related_form	00794367
08285896	_hypernym	08278324
00597634	_derivationally_related_form	10280130
01516290	_derivationally_related_form	03471030
02087745	_derivationally_related_form	00571609
00018158	_derivationally_related_form	10532576
01137138	_derivationally_related_form	10593115
02037090	_hypernym	02038357
00824767	_derivationally_related_form	06713930
00756780	_derivationally_related_form	00854904
00012267	_verb_group	02355596
06508816	_derivationally_related_form	00869931
00535452	_similar_to	00535844
03173524	_hypernym	03234306
03916470	_derivationally_related_form	00043480
01979462	_derivationally_related_form	00058337
08895771	_instance_hypernym	08633957
01186428	_derivationally_related_form	00842692
03408054	_has_part	04384016
01179865	_derivationally_related_form	00838367
03316406	_has_part	04203514
15137047	_hypernym	15163005
03264136	_derivationally_related_form	02361600
05016171	_hypernym	05011790
00735389	_derivationally_related_form	15159819
04372370	_derivationally_related_form	01510173
02430580	_derivationally_related_form	14416845
00357680	_derivationally_related_form	00366547
09606009	_derivationally_related_form	02373336
00522537	_hypernym	00521562
00015303	_derivationally_related_form	00858849
02001858	_also_see	02027030
05731779	_hypernym	05728678
01803003	_derivationally_related_form	00425278
09960545	_derivationally_related_form	13885370
00407146	_hypernym	00406243
01123765	_derivationally_related_form	10605848
01913849	_hypernym	01912159
02876088	_derivationally_related_form	05240211
00233335	_derivationally_related_form	13903079
02014165	_derivationally_related_form	00053097
02417504	_derivationally_related_form	10612931
00335988	_derivationally_related_form	01592072
13582013	_derivationally_related_form	00948071
03315644	_hypernym	04014297
08568978	_hypernym	08630039
09851876	_hypernym	10118844
14292090	_derivationally_related_form	00107739
10426749	_derivationally_related_form	01003249
01745536	_derivationally_related_form	07002992
03800933	_derivationally_related_form	10340312
04446521	_hypernym	03969259
01745722	_derivationally_related_form	01103614
00988287	_derivationally_related_form	00899292
00624553	_hypernym	00621627
00468236	_derivationally_related_form	01158690
01137138	_derivationally_related_form	00122954
00306102	_derivationally_related_form	02014165
04694441	_derivationally_related_form	00509958
03051540	_derivationally_related_form	03128583
00053609	_hypernym	00042757
00072012	_derivationally_related_form	14855724
00469651	_hypernym	00468480
00965871	_derivationally_related_form	09795334
14409489	_hypernym	14408086
00468236	_derivationally_related_form	10362428
10768903	_derivationally_related_form	01535246
00203649	_derivationally_related_form	00800930
07944050	_hypernym	07943480
00314272	_also_see	02676496
01884383	_derivationally_related_form	01888264
09867154	_hypernym	09620078
03763727	_hypernym	03679384
01926311	_derivationally_related_form	07460104
00350380	_derivationally_related_form	10544748
14580090	_derivationally_related_form	01118081
04795545	_derivationally_related_form	00485711
05133535	_hypernym	05133287
14513259	_derivationally_related_form	02992070
01881957	_hypernym	01912159
01914947	_verb_group	01926311
10769459	_derivationally_related_form	02268351
03420559	_hypernym	03763403
02117649	_derivationally_related_form	14377617
04127904	_derivationally_related_form	01945516
00369138	_derivationally_related_form	01376245
14452616	_hypernym	14451911
07184391	_hypernym	07183151
07858595	_hypernym	07809368
00620554	_synset_domain_topic_of	00903559
01159776	_hypernym	01158690
00640828	_derivationally_related_form	00048129
05715283	_hypernym	05712076
01896031	_has_part	02468617
01648126	_derivationally_related_form	10645611
07163988	_derivationally_related_form	00927430
01566705	_derivationally_related_form	07410207
01856626	_derivationally_related_form	10314952
00053097	_derivationally_related_form	02014165
01613463	_derivationally_related_form	01179707
03337140	_derivationally_related_form	01001643
02594102	_derivationally_related_form	11418138
14840092	_hypernym	14580897
02019021	_derivationally_related_form	04991511
13282550	_derivationally_related_form	02519991
01987160	_derivationally_related_form	05074774
00383952	_hypernym	01066163
07541053	_derivationally_related_form	01811441
07411645	_derivationally_related_form	02764765
01811441	_derivationally_related_form	05950733
01606736	_derivationally_related_form	00140393
02590340	_derivationally_related_form	08374049
04073669	_derivationally_related_form	01531265
00752335	_derivationally_related_form	10371741
01215694	_derivationally_related_form	03024882
01928608	_synset_domain_topic_of	06084469
00809654	_hypernym	00811375
01793177	_derivationally_related_form	00908672
00251013	_derivationally_related_form	00180837
14691822	_derivationally_related_form	01511706
09869171	_derivationally_related_form	01963942
00669970	_verb_group	01112584
01001857	_derivationally_related_form	13412321
13996300	_derivationally_related_form	02496816
00358431	_verb_group	02109818
07174433	_derivationally_related_form	00618267
00480969	_derivationally_related_form	05726596
02235666	_verb_group	02537407
05513807	_hypernym	05509146
00420132	_derivationally_related_form	00148057
14498096	_derivationally_related_form	00286605
09704630	_derivationally_related_form	08873622
14429608	_hypernym	14429985
00804802	_derivationally_related_form	07181935
01468576	_derivationally_related_form	00206927
03814112	_hypernym	03848729
01252425	_hypernym	01534147
07317764	_derivationally_related_form	02528380
03581125	_hypernym	03605722
03990474	_hypernym	03101986
04435870	_derivationally_related_form	01884577
07365024	_derivationally_related_form	02530003
08553535	_hypernym	08552138
00935940	_derivationally_related_form	10029269
00597385	_verb_group	01224744
02560548	_also_see	00525453
00930599	_hypernym	00943837
10334567	_hypernym	09929298
13617952	_derivationally_related_form	00467717
01661804	_derivationally_related_form	07335097
00843468	_derivationally_related_form	06730780
02347220	_derivationally_related_form	02463205
00512522	_derivationally_related_form	01037910
00125436	_derivationally_related_form	01247804
01721754	_hypernym	01721556
01941093	_derivationally_related_form	09826204
00406243	_derivationally_related_form	05674584
07800091	_derivationally_related_form	01179865
07334490	_derivationally_related_form	00470701
14436438	_derivationally_related_form	01279978
02714974	_derivationally_related_form	08184217
02072159	_hypernym	02069888
01223833	_derivationally_related_form	13877918
07351031	_derivationally_related_form	01350971
00468480	_hypernym	00467719
09843602	_derivationally_related_form	00035603
06481320	_derivationally_related_form	00945853
00252710	_derivationally_related_form	15147850
02575082	_derivationally_related_form	05896733
04055030	_hypernym	03872495
01673472	_hypernym	01672014
01930117	_verb_group	01930482
02517169	_member_meronym	02517442
04904996	_derivationally_related_form	01791973
01711965	_derivationally_related_form	06262567
02513268	_hypernym	02400037
00605783	_derivationally_related_form	10684630
00589769	_derivationally_related_form	09893191
03405725	_hypernym	03405265
13960117	_hypernym	13959931
07377473	_hypernym	07387509
03679384	_hypernym	03546340
01275762	_derivationally_related_form	13905405
01983264	_derivationally_related_form	00324384
00538876	_hypernym	00537682
07396658	_hypernym	07371293
00203753	_hypernym	00203342
02030424	_derivationally_related_form	07332148
03308152	_hypernym	03574816
00669970	_verb_group	00786458
01432601	_hypernym	01449974
02592111	_derivationally_related_form	08227214
02471327	_derivationally_related_form	00050037
01292727	_derivationally_related_form	14842992
00806049	_derivationally_related_form	07176243
02727825	_hypernym	03294048
10533013	_hypernym	09613191
07308889	_derivationally_related_form	02155799
00862225	_derivationally_related_form	10177014
03337140	_hypernym	03842156
08675967	_has_part	08615374
04490091	_hypernym	03791235
13875970	_derivationally_related_form	00143204
01094086	_derivationally_related_form	07472929
01505254	_hypernym	01448100
00946588	_hypernym	00946755
00819508	_derivationally_related_form	07216083
01426397	_derivationally_related_form	00846515
04893358	_hypernym	04892794
01587077	_also_see	01801600
00992331	_derivationally_related_form	00619183
00463246	_has_part	15274305
00375625	_derivationally_related_form	02161922
01136614	_derivationally_related_form	10152083
01934554	_also_see	01116380
01531998	_derivationally_related_form	04682462
13423922	_synset_domain_topic_of	06084469
04928416	_hypernym	04924103
06414727	_hypernym	06414372
05050379	_derivationally_related_form	00666058
10543795	_derivationally_related_form	00459498
03046257	_hypernym	04437953
15287830	_derivationally_related_form	02052675
00798717	_derivationally_related_form	09754541
00438178	_derivationally_related_form	00330160
02087551	_hypernym	02087122
01223182	_derivationally_related_form	13877918
10191943	_derivationally_related_form	06776138
04935528	_hypernym	04935239
05513529	_has_part	05515287
00685683	_derivationally_related_form	00076341
01307609	_derivationally_related_form	05068716
05513529	_has_part	05519085
00114871	_derivationally_related_form	01454810
14854581	_derivationally_related_form	00074038
00718573	_derivationally_related_form	01268112
00355955	_derivationally_related_form	13467916
10683349	_hypernym	09820263
02427916	_hypernym	01027508
02807731	_has_part	04553703
01688771	_derivationally_related_form	10455619
04051825	_derivationally_related_form	01128071
01070892	_hypernym	01068773
01117723	_hypernym	14485064
00318735	_derivationally_related_form	02636516
05238282	_has_part	05245192
06150633	_derivationally_related_form	02217266
02654686	_derivationally_related_form	14452616
00658052	_derivationally_related_form	14429608
00052334	_derivationally_related_form	02087156
06686174	_derivationally_related_form	00890590
01619929	_derivationally_related_form	00217014
01391280	_hypernym	00463778
01853069	_derivationally_related_form	04021798
00839778	_derivationally_related_form	01201856
05967773	_derivationally_related_form	10084635
01591158	_derivationally_related_form	00335988
07302542	_derivationally_related_form	01561143
00878052	_derivationally_related_form	00697062
06667792	_hypernym	06667317
08436562	_derivationally_related_form	01658762
08308497	_member_meronym	09953965
00444519	_derivationally_related_form	05085572
01742886	_derivationally_related_form	09964411
04988258	_hypernym	04987620
00841986	_derivationally_related_form	10007109
10190516	_derivationally_related_form	02259547
00977336	_derivationally_related_form	06746580
01160729	_hypernym	01161161
13321495	_derivationally_related_form	02502536
01398212	_hypernym	14989820
00597957	_derivationally_related_form	10478960
06876144	_hypernym	06876309
04596630	_hypernym	04424218
03244388	_derivationally_related_form	02057656
06715638	_hypernym	06714976
04194289	_derivationally_related_form	01496978
00227165	_hypernym	00156601
02190188	_derivationally_related_form	04982207
02814533	_hypernym	02958343
01190277	_derivationally_related_form	14018567
02384686	_hypernym	00752764
03364340	_derivationally_related_form	01874568
02043665	_derivationally_related_form	07250339
11499284	_derivationally_related_form	02767116
07188685	_hypernym	07186828
00733483	_derivationally_related_form	02018524
00946105	_derivationally_related_form	01011166
00356790	_derivationally_related_form	01387786
02270165	_derivationally_related_form	10330189
03051540	_hypernym	03093574
07711471	_hypernym	07738353
00324231	_derivationally_related_form	00247792
06696025	_hypernym	06695579
01745722	_derivationally_related_form	10491309
01587077	_derivationally_related_form	04842515
06490887	_derivationally_related_form	00946755
00468480	_derivationally_related_form	10101634
00395797	_derivationally_related_form	01488313
10411163	_hypernym	10529965
00338559	_verb_group	00355955
07176243	_derivationally_related_form	00806049
14455700	_hypernym	13959931
00209546	_derivationally_related_form	00795863
02275365	_verb_group	00758333
00226566	_hypernym	00156601
02037090	_derivationally_related_form	05069199
09759069	_derivationally_related_form	08279298
00795008	_derivationally_related_form	02659763
07332148	_derivationally_related_form	02030424
10034906	_hypernym	10378412
00619183	_derivationally_related_form	15159819
05155821	_derivationally_related_form	02513268
02126382	_hypernym	02125641
05514905	_has_part	05517406
13459322	_hypernym	13542947
04638585	_derivationally_related_form	01182293
04384593	_hypernym	03427296
01843904	_hypernym	01843689
00552815	_derivationally_related_form	11444643
04825383	_hypernym	04876053
08559155	_hypernym	08558963
08578706	_hypernym	08620061
00362128	_derivationally_related_form	13877918
04555897	_hypernym	04437953
00990008	_derivationally_related_form	10380672
14806838	_hypernym	14580897
06651577	_derivationally_related_form	10712835
14704465	_derivationally_related_form	01356750
02670683	_hypernym	03903424
02317661	_derivationally_related_form	01150467
02766687	_derivationally_related_form	07412668
09964805	_derivationally_related_form	01747374
02259547	_derivationally_related_form	07150138
02329292	_derivationally_related_form	05246511
14704966	_hypernym	14702416
01849221	_derivationally_related_form	00280853
00926668	_derivationally_related_form	01626420
01522276	_derivationally_related_form	03150232
02576921	_derivationally_related_form	10076957
02687916	_verb_group	01129201
01583656	_synset_domain_topic_of	06004685
06595351	_hypernym	06263369
06262567	_derivationally_related_form	01002740
00558630	_hypernym	00557588
02767956	_hypernym	04161358
10801291	_derivationally_related_form	01691057
02396716	_derivationally_related_form	00164152
00067990	_derivationally_related_form	02558172
00270005	_derivationally_related_form	00368302
05714894	_hypernym	05713737
05006898	_hypernym	05005250
04119892	_hypernym	03137579
00669762	_derivationally_related_form	09852081
07397955	_hypernym	07397761
14540564	_derivationally_related_form	01323958
02389220	_derivationally_related_form	13939353
10787470	_derivationally_related_form	01484987
00285557	_derivationally_related_form	02091689
01510827	_derivationally_related_form	07338114
01542207	_verb_group	02069888
07410207	_derivationally_related_form	01242391
01539063	_derivationally_related_form	13423922
10037080	_derivationally_related_form	00797299
07255401	_derivationally_related_form	00796392
01002740	_derivationally_related_form	06613686
02067689	_derivationally_related_form	00329227
02695895	_derivationally_related_form	08677628
00213353	_hypernym	00212414
02133435	_derivationally_related_form	14526182
01145015	_derivationally_related_form	02274482
01679806	_derivationally_related_form	04484160
02641463	_derivationally_related_form	15272029
00208497	_derivationally_related_form	13464204
10119200	_hypernym	09606009
02675701	_derivationally_related_form	09964411
07226545	_derivationally_related_form	00884011
00849080	_hypernym	02514187
00834009	_derivationally_related_form	06634960
04137444	_hypernym	03294048
00196084	_derivationally_related_form	00121678
00877083	_derivationally_related_form	01264050
07795317	_hypernym	07776866
05244934	_derivationally_related_form	00492410
00133338	_derivationally_related_form	01412548
10454972	_hypernym	09884391
02653996	_derivationally_related_form	01055165
00192613	_derivationally_related_form	02357228
05695232	_derivationally_related_form	00519854
04694809	_hypernym	04694441
04945057	_derivationally_related_form	01826723
01535246	_derivationally_related_form	10768903
10468750	_derivationally_related_form	00596807
10184946	_derivationally_related_form	01826723
01299758	_derivationally_related_form	07331400
00262792	_also_see	00065791
10468962	_derivationally_related_form	02440020
03169390	_derivationally_related_form	02748927
01270175	_also_see	00976508
00618057	_derivationally_related_form	00076563
00978549	_derivationally_related_form	02643446
00751567	_derivationally_related_form	07168131
08871007	_has_part	08879680
10091012	_derivationally_related_form	00819508
02451951	_also_see	01475282
00264875	_derivationally_related_form	13426238
03233905	_has_part	03682487
01190277	_derivationally_related_form	14064644
01151110	_derivationally_related_form	00815644
03265479	_hypernym	02875013
08871007	_instance_hypernym	08696931
06960298	_hypernym	06941644
00877083	_derivationally_related_form	07143137
02463704	_derivationally_related_form	10608385
04209613	_hypernym	02873839
01654271	_derivationally_related_form	10105085
01061017	_derivationally_related_form	00318735
00952182	_derivationally_related_form	10599806
00299217	_hypernym	00295701
13907415	_derivationally_related_form	01217780
00922867	_hypernym	00928015
01864634	_derivationally_related_form	00337210
04990220	_derivationally_related_form	01452593
03287733	_hypernym	03789946
01924882	_derivationally_related_form	00348008
10115082	_derivationally_related_form	02075049
00946755	_hypernym	01026095
00818974	_derivationally_related_form	07191777
04463679	_derivationally_related_form	01954559
00666058	_derivationally_related_form	05050379
11511523	_derivationally_related_form	02766687
01170052	_derivationally_related_form	00839778
02034300	_derivationally_related_form	00350380
01589497	_derivationally_related_form	00999245
00345641	_derivationally_related_form	01522052
01004072	_derivationally_related_form	00612652
01764171	_derivationally_related_form	04904851
07676425	_hypernym	07675627
00746718	_derivationally_related_form	06539770
00746718	_hypernym	00753428
07174433	_derivationally_related_form	00619869
02254258	_hypernym	01021629
01135529	_hypernym	01133281
00298041	_derivationally_related_form	10618848
02539334	_derivationally_related_form	14442530
02887209	_hypernym	04359589
00343771	_derivationally_related_form	15287830
01126360	_derivationally_related_form	10214062
01539063	_also_see	01505254
09773245	_derivationally_related_form	13860548
00375625	_derivationally_related_form	00731789
03003344	_derivationally_related_form	08871007
02639606	_hypernym	02417504
01097500	_derivationally_related_form	10512201
04689198	_derivationally_related_form	00567291
00233386	_hypernym	00231567
10044879	_derivationally_related_form	00200397
05780885	_derivationally_related_form	02634808
01136614	_hypernym	01134781
00885217	_derivationally_related_form	05689801
02443609	_derivationally_related_form	00597265
01426397	_derivationally_related_form	10114550
00747135	_derivationally_related_form	06663940
07187773	_hypernym	07186828
05959954	_derivationally_related_form	03057075
09273291	_derivationally_related_form	02711114
07570720	_derivationally_related_form	01202728
00797878	_hypernym	00795720
01882814	_derivationally_related_form	09349648
13291189	_derivationally_related_form	02543874
06556692	_derivationally_related_form	00791134
00313806	_hypernym	00313647
02512305	_derivationally_related_form	00065184
01328513	_hypernym	01296462
00812977	_hypernym	00812526
01186208	_derivationally_related_form	07578093
02493260	_derivationally_related_form	00511212
07409121	_derivationally_related_form	00338071
08374049	_derivationally_related_form	00415044
02353844	_derivationally_related_form	03427296
05715864	_derivationally_related_form	02194286
07003119	_derivationally_related_form	01690294
01745722	_derivationally_related_form	06678302
06888345	_derivationally_related_form	02148788
10403876	_synset_domain_topic_of	04468005
02512808	_derivationally_related_form	08657249
10286539	_derivationally_related_form	02464132
01897667	_hypernym	01896031
06428792	_hypernym	06427831
00070965	_derivationally_related_form	00617748
10451858	_derivationally_related_form	00492410
08567235	_derivationally_related_form	01467370
02174461	_derivationally_related_form	07380144
04713692	_derivationally_related_form	02662979
00454868	_derivationally_related_form	07439570
10221312	_derivationally_related_form	00105554
07332148	_hypernym	07331759
00375021	_derivationally_related_form	05014099
07642471	_derivationally_related_form	00212414
08512736	_derivationally_related_form	01466978
06220819	_hypernym	06220616
00451370	_derivationally_related_form	01936048
01266945	_derivationally_related_form	01219993
02235666	_hypernym	02235229
02545272	_derivationally_related_form	09606009
05937112	_derivationally_related_form	02723733
01080691	_derivationally_related_form	00556313
01686956	_derivationally_related_form	05766984
01003729	_derivationally_related_form	00657550
07335243	_hypernym	07334490
02944826	_hypernym	03763727
10062996	_hypernym	09993901
00804139	_derivationally_related_form	07175575
01073822	_also_see	02395115
00083124	_derivationally_related_form	02785648
04863074	_hypernym	04861486
00218753	_derivationally_related_form	01656458
07678729	_hypernym	07882497
02202928	_derivationally_related_form	09984298
08681222	_hypernym	08679972
01510173	_derivationally_related_form	04372370
10034201	_derivationally_related_form	01171183
04989657	_hypernym	04987620
01356750	_derivationally_related_form	04689198
02185664	_derivationally_related_form	07379223
02523521	_verb_group	02523784
01317723	_hypernym	02131279
13291189	_derivationally_related_form	02672540
03458552	_hypernym	03274796
06730563	_hypernym	06729499
07577657	_hypernym	07573696
01076046	_derivationally_related_form	01859221
01000214	_derivationally_related_form	13403643
13962498	_derivationally_related_form	00358431
02094755	_also_see	02523275
01263711	_derivationally_related_form	01097500
00218208	_derivationally_related_form	00311338
09884133	_derivationally_related_form	01322854
00436668	_derivationally_related_form	14575180
02314275	_derivationally_related_form	01150200
01424456	_derivationally_related_form	00417397
01904293	_derivationally_related_form	03364340
01918183	_derivationally_related_form	10553235
01484714	_hypernym	01484392
01180351	_derivationally_related_form	07557434
00779248	_derivationally_related_form	02575723
05060783	_derivationally_related_form	00439343
01062555	_derivationally_related_form	00121166
04894964	_derivationally_related_form	02268351
01675963	_derivationally_related_form	00262743
00452512	_derivationally_related_form	00402535
03542860	_hypernym	02821627
00788564	_derivationally_related_form	05800611
15280497	_derivationally_related_form	00490722
04682018	_derivationally_related_form	01695567
09969491	_derivationally_related_form	00948071
02913152	_has_part	04182890
02519494	_derivationally_related_form	05079866
01086103	_derivationally_related_form	07458453
09961739	_derivationally_related_form	00793037
08008017	_derivationally_related_form	01283746
00695523	_derivationally_related_form	02706816
00709625	_derivationally_related_form	00928077
00073343	_hypernym	00072989
05524615	_has_part	05526175
07679356	_hypernym	07566863
02368336	_also_see	02395115
02766390	_derivationally_related_form	13372123
02291708	_derivationally_related_form	04612722
01123415	_synset_domain_topic_of	00464894
06843520	_hypernym	06841365
10565502	_hypernym	10067968
02527651	_derivationally_related_form	01263018
00657728	_derivationally_related_form	10140783
01791973	_derivationally_related_form	04904996
10703692	_derivationally_related_form	00786458
02001858	_derivationally_related_form	05826914
10101634	_hypernym	10439851
04987620	_hypernym	04983122
08428019	_derivationally_related_form	01996735
01859221	_derivationally_related_form	07365849
02995998	_hypernym	02727825
10003283	_derivationally_related_form	02213074
05644727	_derivationally_related_form	10043643
07537259	_derivationally_related_form	01818972
02272549	_derivationally_related_form	00089027
02241107	_derivationally_related_form	09955015
10287213	_hypernym	09624168
04018399	_has_part	02796995
02075462	_derivationally_related_form	10115082
00091234	_hypernym	00091013
02185664	_derivationally_related_form	07397761
05243704	_hypernym	08657249
05259240	_derivationally_related_form	01223616
02701445	_derivationally_related_form	15273626
10334567	_derivationally_related_form	01922895
07073208	_derivationally_related_form	00933403
06874391	_derivationally_related_form	00781303
10722965	_derivationally_related_form	04879658
00134099	_hypernym	01173038
00337210	_synset_domain_topic_of	04194289
01150559	_derivationally_related_form	10470460
00014742	_also_see	01177505
00521209	_derivationally_related_form	02140033
02381571	_hypernym	02381397
00199912	_derivationally_related_form	00095329
05689249	_derivationally_related_form	00908099
02190188	_hypernym	02191106
11517494	_hypernym	11495041
01290422	_derivationally_related_form	02755352
06489190	_hypernym	06481320
05008227	_derivationally_related_form	01476685
00276620	_derivationally_related_form	01534147
01279978	_also_see	02164402
02053941	_hypernym	01849221
01592456	_derivationally_related_form	00357275
00775156	_derivationally_related_form	07242104
14442933	_derivationally_related_form	02586619
00480751	_derivationally_related_form	03789946
01896031	_has_part	01897991
03393017	_hypernym	04018399
00375071	_hypernym	00374063
01798936	_hypernym	02558172
00867357	_hypernym	00863513
00336539	_hypernym	00336718
01217043	_derivationally_related_form	04360501
00594146	_derivationally_related_form	07240549
05766984	_derivationally_related_form	01686956
01637633	_derivationally_related_form	05769471
01415807	_derivationally_related_form	00133338
05264247	_hypernym	05264081
04404412	_hypernym	04400289
02151625	_has_part	02468864
06709692	_derivationally_related_form	00864159
02011810	_derivationally_related_form	06207561
13384557	_hypernym	13372961
01745722	_derivationally_related_form	08062623
02018524	_derivationally_related_form	00049636
02161922	_derivationally_related_form	00375625
07573696	_hypernym	07570720
07612996	_hypernym	07609840
08050678	_member_meronym	08165455
04474035	_derivationally_related_form	01953810
00869596	_derivationally_related_form	09612131
14455700	_derivationally_related_form	02478059
06290637	_hypernym	06286395
00074790	_derivationally_related_form	02566227
02135048	_derivationally_related_form	11480930
02515341	_similar_to	02517169
13466586	_derivationally_related_form	00104868
00270826	_derivationally_related_form	01159025
00369138	_derivationally_related_form	01378123
01410223	_derivationally_related_form	07410021
02035919	_hypernym	00140967
07649854	_hypernym	07555863
02424652	_derivationally_related_form	10379758
01473806	_hypernym	01471682
01037910	_derivationally_related_form	10787197
01582200	_derivationally_related_form	03879116
01165290	_derivationally_related_form	05695232
00371264	_derivationally_related_form	05725527
07550369	_hypernym	07546465
00035758	_derivationally_related_form	03040587
13559409	_derivationally_related_form	00458471
00968211	_derivationally_related_form	00368302
00042757	_derivationally_related_form	02008396
03100897	_synset_domain_topic_of	03316406
13333237	_hypernym	13329641
00463234	_derivationally_related_form	04293258
03764276	_hypernym	04524313
04209239	_hypernym	03151077
01778568	_derivationally_related_form	06207561
01177033	_derivationally_related_form	02521410
06651577	_derivationally_related_form	00873469
00968211	_derivationally_related_form	06619428
04952944	_derivationally_related_form	02162947
04680285	_hypernym	03178782
09861946	_derivationally_related_form	01944692
03790512	_hypernym	03791235
00329619	_derivationally_related_form	02069888
00406243	_derivationally_related_form	14031523
04190747	_derivationally_related_form	01486312
07150138	_derivationally_related_form	02259547
01168468	_verb_group	01166351
00052043	_derivationally_related_form	03051540
00200397	_derivationally_related_form	10044879
04146050	_has_part	03038685
01699700	_derivationally_related_form	06399995
00932324	_derivationally_related_form	06791372
14480772	_derivationally_related_form	00445169
00794367	_hypernym	00786195
00879607	_derivationally_related_form	01843904
05238282	_has_part	05241072
00509607	_derivationally_related_form	04682462
08622950	_derivationally_related_form	02694933
00116687	_derivationally_related_form	02076999
00513401	_derivationally_related_form	02120458
09858299	_hypernym	09977660
06678302	_derivationally_related_form	01747945
07406765	_derivationally_related_form	02070466
11444117	_derivationally_related_form	02109818
01279305	_derivationally_related_form	13905792
02599004	_derivationally_related_form	10062996
01745536	_hypernym	01706129
00978549	_derivationally_related_form	07128946
10478960	_derivationally_related_form	02163301
10330189	_hypernym	09847010
04682462	_hypernym	04680285
01079480	_verb_group	01080064
02237631	_hypernym	02236124
05238036	_derivationally_related_form	01486312
02583780	_hypernym	02583139
02600490	_derivationally_related_form	00158185
07197021	_derivationally_related_form	02531625
02933304	_derivationally_related_form	05524615
01273263	_hypernym	00508032
01138911	_hypernym	01138523
10680153	_derivationally_related_form	02405390
01743784	_derivationally_related_form	03777283
00754873	_also_see	00311663
09203827	_hypernym	09334396
01377032	_derivationally_related_form	07407777
01539063	_derivationally_related_form	09921409
13809920	_derivationally_related_form	00946105
03663433	_hypernym	03841666
00438178	_hypernym	00226566
10249950	_hypernym	10480253
00596807	_derivationally_related_form	00597265
04511002	_hypernym	03297735
00325502	_hypernym	00325110
00877083	_hypernym	00877327
01570562	_derivationally_related_form	03024882
01687401	_derivationally_related_form	06999233
00973056	_derivationally_related_form	06792645
00902652	_also_see	00903449
05008943	_derivationally_related_form	01477806
00087663	_hypernym	00087423
00504019	_hypernym	00503715
13536794	_derivationally_related_form	02838592
14417146	_hypernym	14416845
10786270	_derivationally_related_form	01014821
00605783	_derivationally_related_form	06414727
04316646	_has_part	03296597
00850501	_derivationally_related_form	09593651
00619869	_derivationally_related_form	05893653
00162688	_verb_group	02405390
00031820	_derivationally_related_form	07127006
05800998	_derivationally_related_form	10451590
02973017	_hypernym	04359335
15155220	_has_part	15164957
00453424	_hypernym	00452512
02958343	_has_part	03530910
01586850	_derivationally_related_form	03391301
10467395	_hypernym	10164747
07168131	_derivationally_related_form	00759657
10024119	_hypernym	10582154
02568065	_derivationally_related_form	00746232
10760763	_derivationally_related_form	00664483
03513627	_hypernym	03264542
10660729	_derivationally_related_form	02066304
02125641	_derivationally_related_form	05713737
10002760	_derivationally_related_form	00910135
01781983	_derivationally_related_form	07520612
01963942	_derivationally_related_form	05086740
03673767	_hypernym	04014297
05088324	_derivationally_related_form	02028994
00048129	_derivationally_related_form	00949288
05821775	_derivationally_related_form	01195299
00191980	_derivationally_related_form	01457954
00371264	_derivationally_related_form	03508101
02202133	_derivationally_related_form	10712573
00469637	_derivationally_related_form	14283178
01177505	_hypernym	02061846
02629256	_derivationally_related_form	01079042
02539334	_derivationally_related_form	10388440
00346693	_derivationally_related_form	00386715
14449405	_derivationally_related_form	02632353
07407777	_derivationally_related_form	02066939
07255401	_derivationally_related_form	00795863
09795124	_hypernym	09875786
02418205	_hypernym	02417504
00065791	_derivationally_related_form	04859177
03532672	_derivationally_related_form	01365549
06709692	_derivationally_related_form	00906735
07412310	_derivationally_related_form	02162947
01428853	_derivationally_related_form	10300303
01238358	_hypernym	01236164
01449974	_derivationally_related_form	09897696
13258362	_derivationally_related_form	10481003
00464321	_derivationally_related_form	05077146
01765178	_derivationally_related_form	04903813
04372370	_hypernym	03096960
00173159	_hypernym	00171586
10002760	_derivationally_related_form	02521816
01667607	_hypernym	01675963
01016778	_hypernym	00818974
07313241	_derivationally_related_form	00365188
00787832	_derivationally_related_form	02497400
00102586	_derivationally_related_form	07420770
01037498	_derivationally_related_form	07136940
01884974	_derivationally_related_form	00331655
09929298	_hypernym	09820263
02459173	_derivationally_related_form	03545150
00329819	_hypernym	00329227
00202284	_derivationally_related_form	00775831
01511706	_derivationally_related_form	14691822
07519253	_derivationally_related_form	01780202
13491060	_derivationally_related_form	00443116
07331400	_derivationally_related_form	02029663
01666131	_synset_domain_topic_of	00243918
07168131	_derivationally_related_form	00751567
01190012	_hypernym	01189604
02340360	_hypernym	02339413
09762385	_derivationally_related_form	00842989
04683814	_derivationally_related_form	02748927
01036804	_derivationally_related_form	07136940
07186661	_derivationally_related_form	02384686
00908672	_derivationally_related_form	04780958
00590148	_derivationally_related_form	09906848
04683814	_derivationally_related_form	01675963
04958634	_derivationally_related_form	00404202
13372123	_derivationally_related_form	02766390
06397903	_derivationally_related_form	00901799
02514187	_verb_group	01033527
04520170	_hypernym	04490091
00230172	_derivationally_related_form	02156546
10057714	_derivationally_related_form	03287733
10525134	_derivationally_related_form	01301410
00107739	_verb_group	00107943
09773245	_derivationally_related_form	00775831
00452293	_hypernym	00451866
01265740	_hypernym	01264283
01322221	_hypernym	01321854
04780755	_derivationally_related_form	01587077
00072012	_hypernym	00072989
02529284	_derivationally_related_form	04665813
01657828	_derivationally_related_form	14818238
10478960	_derivationally_related_form	00597957
09941964	_derivationally_related_form	02441022
00948853	_derivationally_related_form	13582013
02599004	_hypernym	02074677
10079399	_hypernym	10176679
10203949	_derivationally_related_form	02384275
01690294	_derivationally_related_form	03234306
02235229	_derivationally_related_form	10679998
09968845	_derivationally_related_form	00591236
01351170	_derivationally_related_form	00392950
06523132	_hypernym	06520944
04982478	_hypernym	04982207
00752954	_derivationally_related_form	01104624
03173524	_derivationally_related_form	01582645
11495041	_derivationally_related_form	00403149
00845523	_derivationally_related_form	02887741
10113362	_derivationally_related_form	03399047
00351406	_hypernym	00350461
04051549	_derivationally_related_form	02334595
00791134	_derivationally_related_form	06556692
15256915	_has_part	15258694
02418686	_derivationally_related_form	00511817
04982478	_derivationally_related_form	02190188
07642182	_hypernym	07628870
01639105	_derivationally_related_form	13388245
03467984	_has_part	02973017
02963821	_has_part	03521076
00878348	_derivationally_related_form	01166926
07560652	_hypernym	00021265
02687992	_has_part	04396466
10178216	_derivationally_related_form	01236164
02405252	_derivationally_related_form	00208943
02033137	_derivationally_related_form	13869327
01063697	_derivationally_related_form	01860795
00154433	_derivationally_related_form	00665886
00261405	_hypernym	00261258
10062996	_derivationally_related_form	01637633
00219575	_hypernym	00219012
00266806	_derivationally_related_form	00260648
03925226	_derivationally_related_form	00903559
02583139	_derivationally_related_form	00962129
00851933	_derivationally_related_form	05734381
00695300	_derivationally_related_form	00022316
00463543	_has_part	00562935
01328705	_hypernym	01296462
00545501	_hypernym	00100253
02421374	_derivationally_related_form	00095502
00442669	_derivationally_related_form	13491060
04157320	_hypernym	03958097
00751887	_derivationally_related_form	09941964
01953810	_derivationally_related_form	04473432
02493666	_derivationally_related_form	06542047
10506915	_derivationally_related_form	00660102
02406585	_derivationally_related_form	10671736
05514410	_has_part	05521111
06696025	_derivationally_related_form	00768778
02381571	_derivationally_related_form	14441825
01657641	_derivationally_related_form	05731779
02410393	_also_see	00986027
00075618	_hypernym	00070965
00206927	_derivationally_related_form	02401809
00320486	_derivationally_related_form	02001461
10669727	_derivationally_related_form	01118081
10782791	_derivationally_related_form	02288295
08276720	_hypernym	08276342
06855207	_derivationally_related_form	01273016
06756680	_derivationally_related_form	00809654
00490722	_derivationally_related_form	15280497
00870453	_derivationally_related_form	00193486
14031108	_derivationally_related_form	01930512
10709529	_derivationally_related_form	01508368
10118382	_derivationally_related_form	01821634
00999270	_derivationally_related_form	04393095
13858604	_derivationally_related_form	00138508
06387980	_has_part	06394865
05125377	_derivationally_related_form	02690384
01264050	_derivationally_related_form	01952898
07333649	_derivationally_related_form	02008396
01328705	_derivationally_related_form	00371846
15164957	_has_part	15165289
00277659	_derivationally_related_form	01009871
08871007	_has_part	08873622
00351334	_derivationally_related_form	00121678
09879744	_derivationally_related_form	00013172
00841580	_derivationally_related_form	07232988
03859495	_hypernym	03051540
00087849	_hypernym	00087663
00136800	_derivationally_related_form	13897996
04789274	_derivationally_related_form	02141973
01186428	_derivationally_related_form	03836062
00407848	_hypernym	00406243
04768028	_derivationally_related_form	02019021
00193486	_derivationally_related_form	07373803
02743020	_derivationally_related_form	02152212
00884466	_has_part	01232246
04194289	_has_part	03412220
00792471	_verb_group	00753881
08114861	_hypernym	08220714
01016316	_derivationally_related_form	06559365
00741685	_hypernym	00740712
14856263	_derivationally_related_form	02067889
00035603	_hypernym	00035758
00158185	_derivationally_related_form	01803936
10596689	_derivationally_related_form	00311809
03079741	_derivationally_related_form	00483801
02537092	_derivationally_related_form	14984973
02632567	_derivationally_related_form	09367991
08324514	_derivationally_related_form	09944022
00047317	_derivationally_related_form	00795008
06651577	_derivationally_related_form	02439732
04335435	_derivationally_related_form	01945183
10645611	_derivationally_related_form	01648126
03573282	_derivationally_related_form	00187526
00795863	_derivationally_related_form	07255401
07338681	_hypernym	07338552
14361664	_derivationally_related_form	01891817
08184600	_derivationally_related_form	02064131
06258228	_hypernym	06258031
06645039	_derivationally_related_form	02091410
13297850	_hypernym	13296899
02147603	_derivationally_related_form	01049475
07123870	_derivationally_related_form	00850501
05519085	_has_part	05518870
00362348	_derivationally_related_form	01076046
07237758	_derivationally_related_form	02636921
05160796	_derivationally_related_form	00064479
01063695	_hypernym	00752764
01876028	_derivationally_related_form	04098513
10007109	_derivationally_related_form	00757856
06277280	_derivationally_related_form	00969506
02413140	_derivationally_related_form	10554455
01356750	_derivationally_related_form	00052672
02030424	_derivationally_related_form	00368592
07237758	_derivationally_related_form	00842989
01021128	_derivationally_related_form	05925366
01126360	_derivationally_related_form	10369955
02491383	_derivationally_related_form	00509846
06359877	_hypernym	06349220
02124106	_hypernym	02124332
06726939	_derivationally_related_form	00861560
00558630	_synset_domain_topic_of	00469651
09273291	_hypernym	13910384
00600370	_derivationally_related_form	04865722
05256862	_derivationally_related_form	10155849
14580090	_derivationally_related_form	00878348
10153155	_hypernym	09867956
01742726	_derivationally_related_form	13454318
00799798	_derivationally_related_form	05789808
08161068	_member_meronym	10760340
07384898	_derivationally_related_form	00862225
13275288	_hypernym	13252973
02615079	_synset_domain_topic_of	06083243
02834778	_derivationally_related_form	09986189
01845720	_verb_group	01846916
10191943	_derivationally_related_form	05211044
00810557	_derivationally_related_form	00204199
03695122	_has_part	03844550
04049405	_hypernym	03057021
02275365	_derivationally_related_form	09925592
13582013	_derivationally_related_form	00946755
05923696	_derivationally_related_form	00692907
00753685	_derivationally_related_form	00854904
02373336	_hypernym	02370806
01153947	_hypernym	01153762
04794751	_derivationally_related_form	01672607
01273814	_derivationally_related_form	06796119
02424652	_derivationally_related_form	01079604
14890659	_derivationally_related_form	00219012
00896688	_hypernym	00896348
13907415	_derivationally_related_form	02035919
10669991	_derivationally_related_form	00659535
04761815	_hypernym	04761517
10244913	_hypernym	09770949
06685456	_hypernym	07227772
04096066	_has_part	02829696
03316406	_has_part	04008385
14574846	_derivationally_related_form	00906735
02544191	_hypernym	02543874
05662532	_derivationally_related_form	02265231
04391838	_derivationally_related_form	01003049
10475297	_derivationally_related_form	01747945
02109045	_verb_group	00669762
03046257	_derivationally_related_form	00490968
05514905	_has_part	05526384
01356750	_derivationally_related_form	14704465
00193486	_hypernym	00182406
02674564	_hypernym	02133435
06548498	_derivationally_related_form	00161225
02766390	_hypernym	02765924
08894456	_instance_hypernym	08558488
10785869	_hypernym	09773245
00996485	_derivationally_related_form	06404582
01449974	_derivationally_related_form	08057633
01497292	_derivationally_related_form	02967626
00877083	_derivationally_related_form	07258664
07111047	_derivationally_related_form	00952182
02914813	_hypernym	14786479
01915131	_hypernym	01912159
08877382	_instance_hypernym	08524735
02006834	_derivationally_related_form	00048656
01270175	_derivationally_related_form	05060189
00872107	_derivationally_related_form	00640828
01540449	_derivationally_related_form	14597158
02148788	_derivationally_related_form	00520257
10618848	_hypernym	10450303
05768806	_derivationally_related_form	01637633
02673134	_hypernym	00456740
02371718	_derivationally_related_form	05064827
00890100	_derivationally_related_form	06686174
07333649	_derivationally_related_form	02014165
09759311	_derivationally_related_form	08279298
00140393	_derivationally_related_form	01606736
07439570	_derivationally_related_form	00455368
07548366	_hypernym	07501545
07128060	_derivationally_related_form	00030010
00186634	_derivationally_related_form	01111816
02420232	_derivationally_related_form	00453731
07181043	_hypernym	07180787
06731186	_hypernym	06730563
02632567	_derivationally_related_form	10766025
00882702	_derivationally_related_form	02194286
04904996	_hypernym	04904664
15160579	_hypernym	15157041
13450636	_synset_domain_topic_of	06055946
02162947	_hypernym	02133435
01949007	_derivationally_related_form	02930766
04370048	_hypernym	03419014
01239619	_also_see	01240308
10078806	_derivationally_related_form	01739814
03401721	_has_part	02962200
01993352	_derivationally_related_form	07429976
00291873	_derivationally_related_form	04951373
00236592	_derivationally_related_form	02003725
09931640	_derivationally_related_form	00594836
10140783	_derivationally_related_form	00657728
02291548	_verb_group	02291258
05769471	_derivationally_related_form	02418205
10387712	_derivationally_related_form	02339413
08319198	_hypernym	08163273
07181935	_derivationally_related_form	00804802
01376245	_derivationally_related_form	05088324
02527085	_derivationally_related_form	05623628
05950733	_derivationally_related_form	01826723
01928838	_derivationally_related_form	00285557
00751145	_derivationally_related_form	02576921
07332148	_derivationally_related_form	02028994
[truncated: 10,334 more rows]
