# Supplementary material
Source: ML conference proceedings conference paper supplement (https://proceedings.neurips.cc/paper_files/paper/2021/hash/0fd600c953cde8121262e322ef09f70e-Abstract.html)
Supplement: Supplementary file 1 [file 0fd600c953cde8121262e322ef09f70e-Supplemental.zip › Supplementary_Material_Paper_8745/data/GraIL-BM_WN18RR_v4/test/test-random-sample/test1.txt]

00365647	_derivationally_related_form	07313241	1
01186428	_similar_to	08167779	0
02641957	_hypernym	02641463	1
10152083	_member_meronym	00799798	0
03931044	_derivationally_related_form	02861617	1
03777126	_derivationally_related_form	04904996	0
13573666	_hypernym	13575433	1
01201856	_synset_domain_topic_of	04951373	0
10155849	_derivationally_related_form	05256862	1
10168012	_similar_to	10469346	0
00971463	_derivationally_related_form	00222472	1
08282696	_synset_domain_topic_of	05706954	0
04281375	_hypernym	04014297	1
04435870	_member_meronym	06791372	0
00317888	_derivationally_related_form	01018366	1
03327841	_also_see	01426077	0
02100709	_derivationally_related_form	10227266	1
01693727	_similar_to	01470225	0
00311338	_derivationally_related_form	00218208	1
00101191	_synset_domain_topic_of	01264283	0
01019524	_derivationally_related_form	01693881	1
01134861	_synset_domain_topic_of	00161987	0
01954852	_hypernym	01953810	1
01169317	_verb_group	08549733	0
00405079	_derivationally_related_form	00140393	1
08877208	_synset_domain_topic_of	04904996	0
01053144	_derivationally_related_form	05714894	1
03350602	_has_part	04530566	0
01002740	_derivationally_related_form	00907919	1
00734927	_hypernym	14708720	0
04336034	_derivationally_related_form	00220869	1
01531998	_instance_hypernym	01168468	0
03497657	_derivationally_related_form	02363128	1
06876144	_derivationally_related_form	08878016	0
05064037	_hypernym	05062748	1
02155248	_also_see	03327841	0
06262567	_derivationally_related_form	01711965	1
00021766	_instance_hypernym	10314952	0
08620061	_hypernym	00027167	1
02593001	_also_see	00730499	0
00139908	_synset_domain_topic_of	00243918	1
01767163	_synset_domain_topic_of	01201856	0
10695555	_derivationally_related_form	01803380	1
02958343	_also_see	00919424	0
00300537	_derivationally_related_form	10093908	1
01767163	_verb_group	00566135	0
10261388	_derivationally_related_form	01950502	1
13372123	_instance_hypernym	00867231	0
15273626	_derivationally_related_form	00015498	1
14597413	_derivationally_related_form	04980656	0
00748011	_hypernym	00747029	1
04904996	_verb_group	15255804	0
00153961	_derivationally_related_form	00665886	1
02465939	_synset_domain_topic_of	00734927	0
01124794	_derivationally_related_form	02442205	1
10502046	_synset_domain_topic_of	01159025	0
00775156	_derivationally_related_form	07184149	1
14360459	_instance_hypernym	00885925	0
02995998	_derivationally_related_form	02047263	1
00956250	_member_meronym	04904996	0
13864763	_derivationally_related_form	02047807	1
00375071	_synset_domain_topic_of	01524359	0
01177703	_derivationally_related_form	02521816	1
00335653	_similar_to	00876442	0
02828648	_derivationally_related_form	00811171	1
04874672	_has_part	01201856	0
04353803	_derivationally_related_form	00949288	1
05042871	_verb_group	15286249	0
06589574	_has_part	06258031	1
00747757	_instance_hypernym	09953965	0
02454649	_hypernym	02454312	1
00870453	_hypernym	00129089	0
02567147	_derivationally_related_form	01170813	1
01201856	_member_meronym	07674749	0
00828779	_derivationally_related_form	04997472	1
00375071	_member_meronym	05042871	0
02833576	_derivationally_related_form	01884577	1
00392950	_verb_group	04689198	0
00600370	_derivationally_related_form	05700087	1
14597413	_instance_hypernym	15286249	0
01203715	_derivationally_related_form	10470460	1
08877208	_also_see	01689379	0
01665638	_derivationally_related_form	09963320	1
01168468	_similar_to	04874672	0
02045043	_verb_group	02045790	1
02466496	_also_see	10548681	0
04586421	_derivationally_related_form	01522276	1
00716531	_synset_domain_topic_of	01298283	0
02159117	_hypernym	02153959	1
05123760	_member_meronym	04592741	0
02958126	_derivationally_related_form	06946497	1
04689198	_has_part	03773035	0
14064644	_hypernym	14064408	1
08553535	_derivationally_related_form	13560417	0
03194812	_hypernym	03851341	1
10168012	_has_part	15286249	0
01798452	_derivationally_related_form	14376188	1
00206927	_also_see	02281485	0
00458754	_derivationally_related_form	13575433	1
05833252	_synset_domain_topic_of	09960688	0
02523784	_verb_group	02523521	1
01470225	_similar_to	04435870	0
00702226	_derivationally_related_form	04438304	1
02193194	_member_meronym	00566135	0
07255299	_hypernym	07255174	1
09953965	_also_see	00375071	0
01790383	_derivationally_related_form	04904996	1
00263044	_hypernym	00799798	0
02156546	_derivationally_related_form	10746346	1
09953965	_derivationally_related_form	05706954	0
06883073	_hypernym	06882561	1
13390857	_has_part	03520811	0
01126856	_derivationally_related_form	02427916	1
05123760	_hypernym	06791372	0
14425974	_derivationally_related_form	01493897	1
00036362	_has_part	01235258	0
00557588	_derivationally_related_form	01080064	1
04874672	_verb_group	01159025	0
01051956	_derivationally_related_form	10034785	1
00867231	_verb_group	04335435	0
00356790	_derivationally_related_form	01389329	1
02643574	_synset_domain_topic_of	13315077	0
04780958	_derivationally_related_form	00908672	1
00335653	_hypernym	02958343	0
02748927	_derivationally_related_form	02681518	1
07193184	_derivationally_related_form	14374432	0
13887509	_hypernym	13910384	1
07674749	_similar_to	00206927	0
01363482	_derivationally_related_form	00717208	1
03457686	_derivationally_related_form	07458453	0
07620327	_hypernym	07612632	1
04530566	_synset_domain_topic_of	10548681	0
00891936	_derivationally_related_form	10149527	1
14374432	_hypernym	10426454	0
10380672	_derivationally_related_form	07072698	1
01531998	_similar_to	00101191	0
01036804	_derivationally_related_form	06608143	1
10152083	_member_meronym	00730499	0
00368302	_derivationally_related_form	02043190	1
10502046	_derivationally_related_form	02193194	0
02577877	_derivationally_related_form	05695232	1
07575510	_hypernym	02702120	0
01168569	_derivationally_related_form	01122194	1
00579712	_similar_to	04337740	0
07143137	_derivationally_related_form	00876442	1
14597413	_also_see	14010148	0
00308370	_derivationally_related_form	01843055	1
08615374	_similar_to	08553535	0
01904293	_derivationally_related_form	11527967	1
09782167	_hypernym	02963821	0
01460029	_derivationally_related_form	01254051	1
00036362	_has_part	04980656	0
00043683	_hypernym	00044149	1
00566135	_similar_to	00786458	0
13777764	_hypernym	05074774	1
10610465	_member_meronym	10216403	0
10213180	_derivationally_related_form	00808855	1
01168468	_member_meronym	07795598	0
14706026	_derivationally_related_form	00261533	1
10502046	_verb_group	04858455	0
01076046	_derivationally_related_form	00362348	1
13390857	_has_part	00036362	0
05905348	_hypernym	05902545	1
00392950	_synset_domain_topic_of	10469346	0
10492202	_derivationally_related_form	01454636	1
15286249	_verb_group	09213828	0
13464204	_derivationally_related_form	00208497	1
00843128	_verb_group	00876442	0
14477667	_hypernym	14477342	1
13560417	_member_meronym	04019101	0
02001858	_derivationally_related_form	07883860	1
00797430	_member_meronym	00663160	0
01061481	_derivationally_related_form	00943363	1
01298283	_synset_domain_topic_of	07795598	0
02047650	_derivationally_related_form	13878112	1
04592741	_instance_hypernym	01679433	0
05694791	_derivationally_related_form	01807529	1
09886010	_hypernym	05042871	0
15046900	_derivationally_related_form	00445169	1
02055649	_verb_group	04951373	0
02028994	_derivationally_related_form	05088324	1
13390857	_instance_hypernym	01667607	0
02237024	_derivationally_related_form	14875077	1
13926932	_member_meronym	02839200	0
01015104	_hypernym	01014821	1
01169317	_verb_group	00876442	0
00627410	_derivationally_related_form	04761517	1
06876144	_similar_to	03520811	0
04081281	_hypernym	02913152	1
00734927	_synset_domain_topic_of	14292090	0
02400037	_derivationally_related_form	07500414	1
10084635	_synset_domain_topic_of	01736822	0
01097960	_derivationally_related_form	00045646	1
02466496	_synset_domain_topic_of	07172756	0
01582645	_derivationally_related_form	00263813	1
05042871	_synset_domain_topic_of	04660261	0
02671279	_verb_group	02502536	1
13752172	_hypernym	02392600	0
01821266	_derivationally_related_form	14481929	1
13560417	_member_meronym	09953965	0
00605310	_hypernym	00605086	1
02992032	_has_part	02409412	0
01643464	_derivationally_related_form	10029068	1
02055649	_derivationally_related_form	00956250	0
10214062	_derivationally_related_form	01993352	1
02465939	_verb_group	10469346	0
02702120	_hypernym	01116585	1
03700963	_instance_hypernym	07193184	0
02124106	_also_see	02126022	1
00385501	_synset_domain_topic_of	10502046	0
05088056	_derivationally_related_form	00968211	1
15163797	_has_part	10548681	0
13877918	_derivationally_related_form	00362128	1
13345286	_hypernym	02015598	0
01701311	_derivationally_related_form	06376154	1
03925226	_similar_to	13372123	0
05513807	_has_part	05514905	1
02409412	_hypernym	03350602	0
08612786	_derivationally_related_form	01582645	1
07520612	_verb_group	03843555	0
03845360	_derivationally_related_form	14966667	1
03350602	_synset_domain_topic_of	10084635	0
07223170	_derivationally_related_form	01041954	1
05706954	_instance_hypernym	08559155	0
00173764	_also_see	01452593	1
13752172	_hypernym	13752172	0
01385170	_derivationally_related_form	07373803	1
07458453	_has_part	04980656	0
10003283	_derivationally_related_form	02212825	1
01186428	_similar_to	04530566	0
08554440	_hypernym	08553535	1
07236077	_member_meronym	10469346	0
02812482	_derivationally_related_form	08493064	1
05706954	_verb_group	15286249	0
00795008	_derivationally_related_form	00047317	1
08615374	_derivationally_related_form	03432129	0
03872495	_derivationally_related_form	01526956	1
00799798	_derivationally_related_form	01841079	0
01660640	_derivationally_related_form	03792334	1
01186428	_member_meronym	04874672	0
14543552	_derivationally_related_form	01036319	1
00870453	_instance_hypernym	02992032	0
04836074	_derivationally_related_form	00884778	1
00335653	_similar_to	00479076	0
10155849	_derivationally_related_form	07066659	1
14010148	_similar_to	09886010	0
07181935	_derivationally_related_form	00869126	1
07795598	_derivationally_related_form	07674749	0
01140794	_derivationally_related_form	02512053	1
01667607	_hypernym	03843555	0
00432839	_derivationally_related_form	13556509	1
00438178	_member_meronym	04019101	0
08046759	_instance_hypernym	08392137	1
10314952	_also_see	01570562	0
08691669	_hypernym	08524735	1
01667607	_also_see	10426454	0
07254594	_derivationally_related_form	02379198	1
02702120	_member_meronym	05042871	0
14562683	_hypernym	14561618	1
02015598	_member_meronym	01159025	0
04530566	_has_part	04544805	1
10216403	_has_part	04951373	0
10690849	_derivationally_related_form	00850501	1
13282550	_member_meronym	04335435	0
01268457	_derivationally_related_form	14974264	1
09953965	_verb_group	04980656	0
01189224	_derivationally_related_form	07561112	1
00392950	_derivationally_related_form	03520811	0
01840238	_synset_domain_topic_of	00300441	1
07458453	_member_meronym	02392600	0
00436879	_hypernym	00437125	1
01169317	_member_meronym	00843128	0
14562324	_derivationally_related_form	01566490	1
00328128	_similar_to	07182485	0
00566322	_derivationally_related_form	10787470	1
00867231	_derivationally_related_form	00824767	0
10380672	_derivationally_related_form	00828901	1
14597413	_instance_hypernym	05706954	0
14515463	_derivationally_related_form	02225492	1
04951373	_has_part	10216403	0
04096066	_derivationally_related_form	01952750	1
02124332	_hypernym	14010148	0
02958343	_has_part	03327841	1
07458453	_also_see	00988287	0
06893885	_derivationally_related_form	01711445	1
09960688	_also_see	02055649	0
06056923	_hypernym	06055946	1
00566135	_member_meronym	00101191	0
02701445	_derivationally_related_form	04236001	1
13423922	_synset_domain_topic_of	10151570	0
02025009	_derivationally_related_form	08274565	1
04874672	_also_see	13282550	0
13898315	_hypernym	13897996	1
07073208	_also_see	01235258	0
01646941	_also_see	01640850	1
00566135	_synset_domain_topic_of	02155248	0
00946105	_derivationally_related_form	05817845	1
02281485	_hypernym	01426077	0
02045790	_derivationally_related_form	02939919	1
00867231	_similar_to	03056010	0
00085432	_hypernym	00088481	1
01689379	_has_part	00854393	0
10229498	_derivationally_related_form	02202928	1
13752172	_member_meronym	00797430	0
02020413	_derivationally_related_form	14452616	1
08559155	_derivationally_related_form	07123870	0
00854420	_derivationally_related_form	00752431	1
10610465	_instance_hypernym	01531998	0
00746232	_derivationally_related_form	02568065	1
14597413	_hypernym	05706954	0
15101854	_derivationally_related_form	01180701	1
08877208	_also_see	01186428	0
00897564	_derivationally_related_form	09769345	1
00392950	_instance_hypernym	03520811	0
13424183	_derivationally_related_form	02765464	1
00956250	_has_part	00350889	0
01111816	_derivationally_related_form	00043902	1
02409412	_also_see	00930599	0
00321486	_derivationally_related_form	03873064	1
01168468	_derivationally_related_form	03961939	0
02537407	_derivationally_related_form	10206173	1
00797430	_verb_group	09953965	0
01475831	_also_see	01483324	1
04689198	_derivationally_related_form	07356676	0
01273814	_hypernym	01356370	1
09953965	_has_part	06791372	0
09349648	_derivationally_related_form	01882814	1
14514039	_similar_to	09886010	0
04446521	_has_part	04447861	1
10712835	_derivationally_related_form	03337140	0
01215694	_hypernym	02339413	1
00479076	_verb_group	05123760	0
07557165	_hypernym	07570720	1
03925226	_instance_hypernym	01531998	0
02487573	_derivationally_related_form	10757193	1
00956250	_member_meronym	02155248	0
00797878	_derivationally_related_form	02373336	1
00101191	_hypernym	00930599	0
01907258	_also_see	00897564	1
00988287	_hypernym	00844298	0
07007945	_derivationally_related_form	01716882	1
00716531	_hypernym	00730499	0
10544748	_hypernym	10008716	1
14374432	_instance_hypernym	01876530	0
10014939	_hypernym	09770949	1
10151570	_instance_hypernym	08549733	0
01896031	_derivationally_related_form	01392080	1
00716531	_member_meronym	02593001	0
00796976	_verb_group	02237338	1
08877208	_verb_group	06613686	0
02079525	_derivationally_related_form	04493505	1
01470225	_hypernym	13752172	0
02669885	_hypernym	03297735	1
15286249	_member_meronym	10712835	0
07881800	_hypernym	00021265	1
10469346	_synset_domain_topic_of	15155220	0
03626115	_derivationally_related_form	01531265	1
08167779	_hypernym	09960688	0
01986367	_derivationally_related_form	07361416	1
04335435	_hypernym	03961939	0
00218045	_derivationally_related_form	01661804	1
02992032	_derivationally_related_form	04335435	0
01039330	_derivationally_related_form	06791372	1
04019101	_has_part	00885925	0
00643197	_derivationally_related_form	00704305	1
09960688	_has_part	01841079	0
10435988	_derivationally_related_form	02048891	1
13345286	_verb_group	05245192	0
00545501	_derivationally_related_form	01704236	1
08282696	_also_see	01235258	0
02313250	_derivationally_related_form	01150200	1
07172756	_similar_to	10502046	0
02466670	_derivationally_related_form	08163273	1
07575510	_instance_hypernym	03700963	0
06387980	_has_part	06397903	1
04592741	_has_part	04019101	0
01778568	_derivationally_related_form	02011810	1
00392950	_derivationally_related_form	03686658	0
01672014	_derivationally_related_form	03624966	1
07182485	_derivationally_related_form	01689379	0
01929254	_derivationally_related_form	15280497	1
02124332	_instance_hypernym	07193184	0
03424630	_hypernym	03579982	1
00199659	_derivationally_related_form	04951373	0
03461385	_derivationally_related_form	02326198	1
05706954	_hypernym	03843555	0
02748927	_derivationally_related_form	04683814	1
00479076	_verb_group	14360459	0
04802629	_derivationally_related_form	00617748	1
00328128	_hypernym	14012667	0
11473138	_hypernym	11480698	1
13255145	_member_meronym	02839200	0
02575723	_derivationally_related_form	00752954	1
08282696	_also_see	04592741	0
02103162	_verb_group	01448100	1
01903756	_derivationally_related_form	06876144	0
00216174	_derivationally_related_form	02402825	1
00797430	_synset_domain_topic_of	00919424	0
03246454	_derivationally_related_form	01985923	1
00350889	_similar_to	01689379	0
02443049	_derivationally_related_form	10388732	1
04874672	_synset_domain_topic_of	02193765	0
07420770	_derivationally_related_form	00258857	1
07356676	_hypernym	02958343	0
05765901	_derivationally_related_form	02723733	1
01903756	_verb_group	09953965	0
07163988	_derivationally_related_form	00930806	1
07172756	_has_part	03042697	0
01930117	_derivationally_related_form	03789946	1
13255145	_hypernym	00161987	0
04463679	_hypernym	02788689	1
13255145	_verb_group	02384275	0
01664172	_verb_group	01755504	1
04337740	_has_part	14010148	0
02088627	_derivationally_related_form	07380144	1
04337740	_derivationally_related_form	15286249	0
02141973	_derivationally_related_form	04789274	1
06791372	_instance_hypernym	01903756	0
07231294	_derivationally_related_form	00868591	1
00854393	_has_part	00867231	0
02357228	_hypernym	02267060	1
08890097	_also_see	00988287	0
00657550	_derivationally_related_form	00874977	1
04660261	_synset_domain_topic_of	03432129	0
01437888	_derivationally_related_form	08463063	1
01134861	_has_part	14597413	0
01323958	_derivationally_related_form	10231087	1
06791372	_verb_group	10168012	0
13860548	_hypernym	13854649	1
04980656	_similar_to	03843555	0
03322099	_derivationally_related_form	02420232	1
10610465	_member_meronym	03457686	0
01480149	_verb_group	01480469	1
02593001	_also_see	04951373	0
02091165	_derivationally_related_form	00285889	1
03457686	_derivationally_related_form	07172756	0
10700517	_hypernym	10523519	1
01348174	_also_see	02466496	0
06399995	_derivationally_related_form	02469443	1
08615374	_verb_group	02963821	0
03002351	_derivationally_related_form	06135915	1
01168468	_similar_to	01767163	0
01100145	_derivationally_related_form	10782940	1
04951373	_member_meronym	07674749	0
01350971	_derivationally_related_form	07351031	1
10426454	_instance_hypernym	00335653	0
01489722	_derivationally_related_form	14425974	1
09782167	_instance_hypernym	02392600	0
02501738	_derivationally_related_form	00206927	1
13372123	_verb_group	04874672	0
00730301	_derivationally_related_form	08592656	1
09782167	_instance_hypernym	08553535	0
00952841	_derivationally_related_form	07135734	1
01524359	_synset_domain_topic_of	00479076	0
08279298	_derivationally_related_form	09759069	1
08615374	_derivationally_related_form	02839200	0
00663160	_synset_domain_topic_of	07073447	1
13390857	_hypernym	02392600	0
08463647	_hypernym	08463063	1
00386715	_has_part	02015598	0
01251928	_derivationally_related_form	04694441	1
10084635	_hypernym	15255804	0
05103946	_derivationally_related_form	01382086	1
14451911	_has_part	00870453	0
00331655	_derivationally_related_form	01893988	1
00919424	_also_see	00161987	0
02958017	_derivationally_related_form	08860123	1
01298283	_instance_hypernym	00350889	0
00317700	_hypernym	00153263	1
14010148	_hypernym	08559155	0
05924920	_hypernym	05923696	1
00375071	_also_see	08549733	0
00101191	_derivationally_related_form	01726172	1
00307631	_synset_domain_topic_of	00206927	0
00697062	_derivationally_related_form	09822955	1
00730499	_hypernym	04858455	0
00735936	_hypernym	00732746	1
01531998	_similar_to	14012667	0
10018021	_derivationally_related_form	00807461	1
00335653	_synset_domain_topic_of	10469346	0
02058994	_derivationally_related_form	15282696	1
10469346	_similar_to	04660261	0
02291708	_hypernym	02289295	1
14451911	_instance_hypernym	01186428	0
03119510	_hypernym	03736970	1
01903756	_hypernym	02839200	0
01160729	_derivationally_related_form	01416193	1
01201856	_derivationally_related_form	10084635	0
01687569	_derivationally_related_form	07066659	1
03056010	_verb_group	00263044	0
08523483	_derivationally_related_form	00329831	1
00375071	_derivationally_related_form	00375071	0
00695523	_also_see	02451951	1
04592741	_synset_domain_topic_of	03700963	0
09941964	_hypernym	10317007	1
06610436	_verb_group	02972533	0
01169704	_verb_group	01186428	1
00479076	_member_meronym	05042871	0
09938672	_derivationally_related_form	14984973	1
00663160	_member_meronym	01169317	0
02706816	_hypernym	01116585	1
13560417	_also_see	00036362	0
00439343	_derivationally_related_form	00330160	1
07073208	_instance_hypernym	13752172	0
03802973	_hypernym	02676261	1
10314952	_hypernym	00101191	0
09962789	_derivationally_related_form	02077656	1
04019101	_synset_domain_topic_of	07458453	0
11197099	_instance_hypernym	10423225	1
00206927	_also_see	03925226	0
01539633	_derivationally_related_form	14598079	1
10151570	_has_part	07575510	0
14513259	_hypernym	13934596	1
03686658	_hypernym	03843555	0
06787037	_hypernym	06786629	1
15163797	_instance_hypernym	00867231	0
02159427	_derivationally_related_form	10562749	1
01524359	_also_see	07458453	0
01173826	_derivationally_related_form	01082153	1
00867231	_member_meronym	08890097	0
07503430	_derivationally_related_form	01774426	1
01524359	_hypernym	02392600	0
00235368	_derivationally_related_form	15224293	1
14514039	_derivationally_related_form	08282696	0
04930307	_derivationally_related_form	00300537	1
02055649	_has_part	01736822	0
03708036	_derivationally_related_form	00998399	1
01186428	_similar_to	00021766	0
01846658	_hypernym	01846916	1
02340360	_derivationally_related_form	07356676	0
02945161	_derivationally_related_form	02653996	1
00479076	_verb_group	14514039	0
00717208	_derivationally_related_form	01363482	1
14292090	_also_see	02124332	0
00471196	_derivationally_related_form	07334490	1
14012667	_member_meronym	08877208	0
00219012	_derivationally_related_form	14890659	1
00797430	_derivationally_related_form	00820801	0
14417146	_derivationally_related_form	00483801	1
00747757	_member_meronym	04689198	0
02240881	_derivationally_related_form	10575787	1
15255804	_also_see	01168468	0
00483466	_derivationally_related_form	13898315	1
02055649	_derivationally_related_form	02155248	0
01452255	_derivationally_related_form	10162507	1
00824767	_has_part	00956250	0
03065685	_derivationally_related_form	14854262	1
08615374	_instance_hypernym	08615374	0
10087736	_hypernym	10266848	1
03042697	_member_meronym	08890097	0
01918183	_derivationally_related_form	00284101	1
00820801	_synset_domain_topic_of	09213828	0
00066901	_derivationally_related_form	02523521	1
04019101	_instance_hypernym	14010148	0
10140783	_derivationally_related_form	00658052	1
13926932	_hypernym	00438178	0
08366202	_derivationally_related_form	00298041	1
00479076	_derivationally_related_form	09415938	0
03519981	_hypernym	04096066	1
00307631	_hypernym	07674749	0
00105778	_derivationally_related_form	09930876	1
13926932	_has_part	00885925	0
08062623	_derivationally_related_form	01745722	1
00885925	_similar_to	00919424	0
00052672	_derivationally_related_form	04935528	1
03520811	_member_meronym	09782167	0
07191777	_derivationally_related_form	00777931	1
02466496	_verb_group	07795598	0
09927089	_derivationally_related_form	01533442	1
00129089	_synset_domain_topic_of	03457686	0
03532672	_hypernym	03736970	1
02015598	_verb_group	00129089	0
00044353	_derivationally_related_form	14481929	1
14451911	_member_meronym	05245192	0
08647616	_synset_domain_topic_of	02691156	1
14708720	_instance_hypernym	07520612	0
00263044	_derivationally_related_form	14463826	1
00930599	_verb_group	01570562	0
02742468	_derivationally_related_form	01859586	1
05042871	_also_see	08549733	0
02577586	_hypernym	02575082	1
01679433	_verb_group	14010148	0
01765908	_derivationally_related_form	05832264	1
09960688	_instance_hypernym	01767163	0
00876665	_derivationally_related_form	09953965	1
00579712	_hypernym	01693727	0
05244934	_hypernym	04682462	1
10168012	_hypernym	10168012	0
15237567	_derivationally_related_form	02677332	1
01876530	_has_part	00843128	0
00216174	_derivationally_related_form	02422026	1
00747757	_also_see	00734927	0
02958126	_derivationally_related_form	06950528	1
02281485	_also_see	15255804	0
02924116	_derivationally_related_form	01950128	1
03520811	_verb_group	02465939	0
07458453	_derivationally_related_form	01086103	1
06791372	_derivationally_related_form	14708720	0
09965134	_derivationally_related_form	01038538	1
02972533	_also_see	00867231	0
00928077	_derivationally_related_form	00709625	1
06613686	_similar_to	03327841	0
00850501	_derivationally_related_form	07123870	1
01693727	_derivationally_related_form	14514039	0
07460104	_hypernym	07458453	1
01877204	_instance_hypernym	01159025	0
01149480	_derivationally_related_form	00235368	1
14514039	_has_part	00479076	0
08274923	_derivationally_related_form	02599939	1
03432129	_synset_domain_topic_of	00335653	0
01912709	_hypernym	01912159	1
03520811	_hypernym	01976841	0
00384620	_derivationally_related_form	00258854	1
10216403	_hypernym	07674749	0
05704266	_derivationally_related_form	00601043	1
02340360	_has_part	08549733	0
05923696	_derivationally_related_form	00624967	1
10469346	_similar_to	00885925	0
02913152	_has_part	03579538	1
10502046	_derivationally_related_form	01298283	0
00471711	_derivationally_related_form	00395333	1
03773035	_instance_hypernym	00734927	0
00512843	_hypernym	00511817	1
04660261	_similar_to	13315077	0
00774344	_derivationally_related_form	07150138	1
03327841	_hypernym	03350602	0
00092293	_derivationally_related_form	14561618	1
01298283	_member_meronym	06613686	0
14543552	_derivationally_related_form	02697120	1
06613686	_hypernym	01264283	0
00788184	_derivationally_related_form	07193958	1
05706954	_derivationally_related_form	09213828	0
04842515	_derivationally_related_form	01793177	1
02643574	_synset_domain_topic_of	08878016	0
00634586	_hypernym	00633864	1
03350602	_verb_group	06610436	0
00064479	_derivationally_related_form	05155821	1
02643574	_verb_group	01470225	0
02175578	_derivationally_related_form	04555897	1
01570562	_hypernym	01689379	0
13482330	_derivationally_related_form	02743727	1
04951373	_synset_domain_topic_of	01348174	0
09845999	_derivationally_related_form	04683814	1
01679433	_member_meronym	08282696	0
00380159	_derivationally_related_form	07444668	1
01531998	_derivationally_related_form	00786458	0
14561618	_derivationally_related_form	00208497	1
07073208	_has_part	14514039	0
08683548	_hypernym	08574314	1
02643574	_has_part	01524359	0
01227137	_derivationally_related_form	04873550	1
00885925	_instance_hypernym	13315077	0
00180837	_derivationally_related_form	00251013	1
03700963	_derivationally_related_form	02465939	0
01587077	_derivationally_related_form	04780755	1
03843555	_hypernym	03337140	0
10565302	_derivationally_related_form	00697062	1
00876442	_derivationally_related_form	08615374	0
08337324	_hypernym	08077292	1
15286249	_also_see	05123760	0
04188368	_hypernym	03670849	1
00566135	_derivationally_related_form	00824767	0
02098458	_verb_group	01505254	1
10712835	_also_see	01693727	0
09811852	_derivationally_related_form	02950256	1
04951373	_verb_group	00824767	0
01137138	_verb_group	01134781	1
08549733	_similar_to	08549733	0
04216963	_has_part	03309465	1
00844298	_member_meronym	02466496	0
05683582	_hypernym	05669934	1
05245192	_instance_hypernym	06518068	0
01654271	_derivationally_related_form	10201535	1
02384275	_derivationally_related_form	04689198	0
02482425	_derivationally_related_form	00222248	1
09415938	_derivationally_related_form	10168012	0
10641551	_derivationally_related_form	00796976	1
15286249	_hypernym	00392950	0
14429608	_derivationally_related_form	00658052	1
01524359	_derivationally_related_form	00036362	0
01209135	_verb_group	01123887	1
02466496	_instance_hypernym	00844298	0
00208497	_derivationally_related_form	14561618	1
01470225	_verb_group	07520612	0
01533442	_verb_group	01532434	1
01169317	_also_see	14708720	0
01244410	_also_see	02510879	1
02091165	_similar_to	04530566	0
01233027	_hypernym	01410223	1
00438178	_verb_group	10168012	0
00259177	_hypernym	00258854	1
08615374	_hypernym	08615374	0
02188699	_has_part	02152212	1
13560417	_hypernym	10426454	0
00335988	_derivationally_related_form	00009631	1
10216403	_similar_to	01298283	0
02237338	_derivationally_related_form	06634239	1
03773035	_similar_to	04592741	0
10506762	_hypernym	10622053	1
02409412	_member_meronym	06613686	0
01161635	_derivationally_related_form	07335243	1
13255145	_derivationally_related_form	04689198	0
00335653	_derivationally_related_form	00386715	1
04435870	_member_meronym	02340360	0
01219993	_derivationally_related_form	01266945	1
06610436	_derivationally_related_form	13345286	0
00215683	_derivationally_related_form	02402409	1
00161987	_derivationally_related_form	01679433	0
10338707	_derivationally_related_form	01327301	1
06610436	_instance_hypernym	06610436	0
02196690	_derivationally_related_form	14607521	1
01767163	_has_part	14451911	0
00786458	_derivationally_related_form	10703692	1
04660261	_verb_group	13315077	0
02250625	_derivationally_related_form	13282550	1
03520811	_similar_to	13390857	0
10020890	_hypernym	10305802	1
00930599	_derivationally_related_form	00350889	0
02126382	_derivationally_related_form	03916031	1
08878016	_member_meronym	13752172	0
02480923	_hypernym	00795863	1
00263044	_also_see	05833252	0
01020936	_hypernym	01019524	1
15163797	_also_see	03327841	0
07333649	_hypernym	07355491	1
02466496	_instance_hypernym	04874672	0
00264529	_derivationally_related_form	00220869	1
01186428	_synset_domain_topic_of	00101191	0
00072012	_derivationally_related_form	13533886	1
00876442	_synset_domain_topic_of	14708720	0
01405044	_hypernym	01511706	1
00988287	_also_see	09960688	0
01037650	_derivationally_related_form	06610332	1
02702120	_derivationally_related_form	13926932	0
01073822	_derivationally_related_form	07813107	1
08167779	_similar_to	07182485	0
04105438	_hypernym	04014297	1
13423922	_derivationally_related_form	00885925	0
06210363	_derivationally_related_form	02611373	1
03432129	_member_meronym	10151570	0
00368847	_derivationally_related_form	00612114	1
10152083	_hypernym	13372123	0
04490091	_has_part	04294614	1
02281485	_similar_to	05245192	0
05636048	_hypernym	05638987	1
01524359	_derivationally_related_form	02958343	0
04226322	_hypernym	02887209	1
03457686	_similar_to	00844298	0
02043982	_derivationally_related_form	08612049	1
01159025	_has_part	01159025	0
10044879	_derivationally_related_form	00592102	1
03457686	_hypernym	00566135	0
15145586	_derivationally_related_form	09827683	1
07172756	_instance_hypernym	00085678	0
00406243	_derivationally_related_form	14031108	1
06613686	_hypernym	05833252	0
13855627	_derivationally_related_form	02666882	1
04980656	_member_meronym	02340360	0
00999787	_derivationally_related_form	00922867	1
02155248	_also_see	02593001	0
02033805	_hypernym	01907258	1
03777126	_synset_domain_topic_of	00328128	0
00962634	_similar_to	00963283	1
01159025	_member_meronym	10216403	0
00814850	_derivationally_related_form	10510546	1
02409412	_also_see	02193765	0
10037385	_derivationally_related_form	01190494	1
05245192	_also_see	07182485	0
07410207	_hypernym	07338681	1
00263044	_similar_to	02155248	0
01675963	_verb_group	02749247	1
00730499	_also_see	14451911	0
10491309	_hypernym	10480253	1
02193765	_synset_domain_topic_of	01736822	0
10451590	_hypernym	10207831	1
03773035	_synset_domain_topic_of	04660261	0
05068080	_derivationally_related_form	02038791	1
09213828	_hypernym	03843555	0
10712835	_derivationally_related_form	06651577	1
00716531	_derivationally_related_form	02593354	0
01158690	_derivationally_related_form	00467717	1
04435870	_has_part	07458453	0
08879197	_instance_hypernym	08524735	1
00227165	_also_see	01264283	0
01253665	_hypernym	00231887	1
00156601	_instance_hypernym	01348174	0
01955984	_verb_group	02742232	1
07458453	_verb_group	02972533	0
00877345	_derivationally_related_form	00645939	1
09415938	_instance_hypernym	01134861	0
02761834	_has_part	03537412	1
09213828	_member_meronym	01169317	0
00257770	_hypernym	00255214	1
08282696	_similar_to	08553535	0
00884011	_derivationally_related_form	10482054	1
01767163	_has_part	02193765	0
11527967	_derivationally_related_form	01904293	1
06876144	_member_meronym	04592741	0
01325536	_verb_group	01323958	1
08559155	_has_part	03520811	0
00240938	_derivationally_related_form	02384041	1
01235258	_also_see	13560417	0
04620558	_derivationally_related_form	01229631	1
07193184	_member_meronym	02384275	0
07889510	_hypernym	07886849	1
04019101	_hypernym	14597413	0
14489113	_derivationally_related_form	00432839	1
10548681	_has_part	13372123	0
00113818	_derivationally_related_form	00758972	1
04689198	_similar_to	08559155	0
01125693	_derivationally_related_form	02466670	1
03432129	_also_see	00375071	0
03427296	_has_part	03521076	1
00867231	_hypernym	06518068	0
13556509	_hypernym	13464204	1
01667607	_verb_group	00479076	0
02667228	_hypernym	02666882	1
01134861	_has_part	14374432	0
01537409	_derivationally_related_form	00072261	1
04858455	_member_meronym	00854393	0
02141973	_derivationally_related_form	06890846	1
08549733	_verb_group	03686658	0
01168468	_derivationally_related_form	00838367	1
01736822	_member_meronym	04530566	0
14110411	_derivationally_related_form	00443384	1
01159025	_instance_hypernym	10084635	0
05798569	_hypernym	05924920	1
08282696	_has_part	01470225	0
00869596	_derivationally_related_form	09612291	1
03432129	_verb_group	10469346	0
13934900	_derivationally_related_form	02673134	1
04592741	_also_see	07193184	0
01398941	_hypernym	01398212	1
03056010	_also_see	06610436	0
05068461	_derivationally_related_form	02037090	1
13345286	_member_meronym	00930599	0
00968211	_derivationally_related_form	05088324	1
07795598	_hypernym	10314952	0
01136614	_derivationally_related_form	02746365	1
04951373	_derivationally_related_form	07458453	0
02464342	_hypernym	02463704	1
09213828	_derivationally_related_form	01693727	0
02077656	_also_see	01973125	1
14708720	_verb_group	10469346	0
02632353	_derivationally_related_form	14449405	1
07172756	_derivationally_related_form	07795598	0
09994119	_hypernym	09993901	1
05042871	_synset_domain_topic_of	02643574	0
11466043	_derivationally_related_form	00372665	1
02384275	_member_meronym	04592741	0
00793271	_derivationally_related_form	01157850	1
02409412	_instance_hypernym	07795598	0
10036266	_derivationally_related_form	01165043	1
05245192	_synset_domain_topic_of	03925226	0
02068413	_derivationally_related_form	07436100	1
13345286	_member_meronym	02593354	0
04490091	_derivationally_related_form	01954341	1
00843128	_similar_to	03700963	0
02586619	_derivationally_related_form	10541229	1
04435870	_member_meronym	13390857	0
07884567	_hypernym	07881800	1
02381571	_similar_to	14514039	0
07365849	_derivationally_related_form	01859586	1
13372123	_instance_hypernym	00385501	0
05696020	_derivationally_related_form	00456740	1
04951373	_also_see	00799798	0
01846320	_derivationally_related_form	00312784	1
04874672	_hypernym	01201856	0
01859586	_hypernym	01859221	1
13423922	_instance_hypernym	13926932	0
00407633	_derivationally_related_form	03793186	1
14292090	_instance_hypernym	01903756	0
07375635	_derivationally_related_form	02014553	1
02992032	_member_meronym	10548681	0
07142566	_hypernym	07140659	1
06613686	_hypernym	01531998	0
05196582	_derivationally_related_form	02539334	1
00843128	_derivationally_related_form	14292090	0
01912159	_derivationally_related_form	00296946	1
00335653	_instance_hypernym	02381571	0
01726172	_verb_group	01725051	1
14012667	_similar_to	03350602	0
00434374	_verb_group	00358431	1
02958343	_verb_group	10426454	0
02052675	_hypernym	02052476	1
03700963	_instance_hypernym	02839200	0
06376154	_hypernym	07092158	1
03327841	_hypernym	13345286	0
07123870	_derivationally_related_form	01053771	1
04530566	_instance_hypernym	07182485	0
02700867	_verb_group	02701210	1
06613686	_verb_group	13282550	0
01201429	_derivationally_related_form	02431320	1
00786458	_synset_domain_topic_of	00930599	0
03525454	_derivationally_related_form	01217043	1
03520811	_member_meronym	02958343	0
03233905	_derivationally_related_form	01995211	1
13315077	_verb_group	02963821	0
07196682	_hypernym	06285090	1
03337140	_member_meronym	01876530	0
01674717	_derivationally_related_form	03965907	1
01841079	_has_part	08167779	0
00152018	_derivationally_related_form	01026095	1
08282696	_similar_to	01235258	0
07220773	_has_part	06396930	1
00579712	_synset_domain_topic_of	09782167	0
06490887	_hypernym	06481320	1
09213828	_synset_domain_topic_of	02958343	0
00978549	_derivationally_related_form	07128692	1
09213828	_similar_to	10712835	0
00297062	_hypernym	00295701	1
13345286	_also_see	00385501	0
07475364	_derivationally_related_form	02473688	1
10712835	_also_see	04689198	0
13650045	_has_part	13649791	1
00870453	_similar_to	10216403	0
07472929	_derivationally_related_form	01094086	1
07172756	_has_part	03042697	0
00601783	_derivationally_related_form	07183151	1
07172756	_synset_domain_topic_of	00385501	0
01606205	_hypernym	01587062	1
02466496	_hypernym	00227165	0
10597234	_derivationally_related_form	02409941	1
01201856	_instance_hypernym	01264283	0
05651971	_derivationally_related_form	00272391	1
01570562	_similar_to	00824767	0
01227137	_also_see	01222884	1
03925226	_similar_to	01186428	0
01244410	_also_see	01460421	1
00206927	_derivationally_related_form	00101191	0
01877355	_hypernym	01876530	1
00227165	_has_part	01201856	0
00973056	_derivationally_related_form	04472726	1
01841079	_synset_domain_topic_of	00844298	0
01049685	_derivationally_related_form	02148369	1
05706954	_instance_hypernym	10151570	0
11498040	_derivationally_related_form	01505254	1
02958343	_instance_hypernym	02643574	0
01169067	_hypernym	01168468	1
01767163	_derivationally_related_form	05833252	0
04412901	_hypernym	04306080	1
00479076	_member_meronym	10168012	0
02653996	_derivationally_related_form	04411264	1
04592741	_derivationally_related_form	03337140	0
01935476	_derivationally_related_form	02834778	1
02155248	_has_part	00854393	0
08513163	_hypernym	08552138	1
03337140	_similar_to	02340360	0
10527334	_derivationally_related_form	00963283	1
04874672	_verb_group	03961939	0
00403401	_derivationally_related_form	11495041	1
01570562	_hypernym	08877208	0
02133435	_derivationally_related_form	04674715	1
10502046	_instance_hypernym	04530566	0
10287213	_derivationally_related_form	01475831	1
13255145	_similar_to	04337740	0
06595351	_has_part	06258228	1
07674749	_also_see	00844298	0
04304375	_hypernym	03273061	1
02992032	_synset_domain_topic_of	15255804	0
10221312	_derivationally_related_form	00853633	1
05706954	_hypernym	10151570	0
01448100	_also_see	01592456	1
01159025	_member_meronym	02466496	0
13754293	_derivationally_related_form	00153263	1
01679433	_hypernym	06876144	0
08617963	_derivationally_related_form	02693168	1
13345286	_member_meronym	03925226	0
02691156	_has_part	03295928	1
00786458	_similar_to	00786458	0
02194495	_hypernym	02194286	1
08559155	_instance_hypernym	00734927	0
02727039	_derivationally_related_form	05125377	1
02378183	_synset_domain_topic_of	00988287	0
13575433	_derivationally_related_form	03000447	1
10469346	_instance_hypernym	00876442	0
01155687	_derivationally_related_form	00506658	1
01976841	_hypernym	00579712	0
00869126	_derivationally_related_form	07183151	1
08167779	_derivationally_related_form	10216403	0
02742232	_derivationally_related_form	03244388	1
14374432	_hypernym	08878016	0
06843520	_derivationally_related_form	01589363	1
04904996	_instance_hypernym	00730499	0
00276813	_derivationally_related_form	01531998	1
00375071	_member_meronym	04689198	0
05716744	_hypernym	05715283	1
14012667	_similar_to	00716531	0
00050037	_derivationally_related_form	02471327	1
02281485	_derivationally_related_form	10084635	0
15282696	_derivationally_related_form	02058994	1
01134861	_member_meronym	07073208	0
07561112	_hypernym	07560652	1
10469346	_derivationally_related_form	09483738	0
02818832	_derivationally_related_form	02337066	1
00375071	_verb_group	09886010	0
10467395	_derivationally_related_form	02984104	1
02193765	_synset_domain_topic_of	14451911	0
06811625	_derivationally_related_form	00931852	1
15155220	_verb_group	05706954	0
02593354	_derivationally_related_form	10478960	1
00392950	_instance_hypernym	05706954	0
01036804	_derivationally_related_form	07137129	1
08890097	_instance_hypernym	14012667	0
06730780	_derivationally_related_form	00843468	1
02702120	_hypernym	00797430	0
03949442	_derivationally_related_form	01163847	1
00799798	_synset_domain_topic_of	01186428	0
08647616	_synset_domain_topic_of	07006119	1
06613686	_hypernym	10084635	0
00814458	_verb_group	00865387	1
02465939	_derivationally_related_form	10712835	0
04125853	_hypernym	02827606	1
00350889	_member_meronym	01426077	0
02517202	_derivationally_related_form	00732746	1
00307631	_member_meronym	04530566	0
01456771	_derivationally_related_form	07351031	1
03686658	_member_meronym	13315077	0
01189604	_hypernym	01196037	1
03520811	_derivationally_related_form	09886010	0
08628921	_derivationally_related_form	02727039	1
01570562	_synset_domain_topic_of	02466496	0
05960464	_hypernym	05943300	1
00129089	_verb_group	10548681	0
04811126	_derivationally_related_form	02480923	1
07193184	_verb_group	07073208	0
13381734	_derivationally_related_form	02311260	1
10216403	_member_meronym	00956250	0
02532595	_derivationally_related_form	00639556	1
02051270	_similar_to	02972533	0
01163779	_hypernym	01161161	1
13282550	_synset_domain_topic_of	01689379	0
02515080	_hypernym	02514187	1
07193184	_instance_hypernym	00747757	0
01350699	_verb_group	01349130	1
10216403	_also_see	04858455	0
00330457	_derivationally_related_form	00439343	1
01470225	_member_meronym	07458453	0
00796588	_derivationally_related_form	13935227	1
00438178	_also_see	07356676	0
00567044	_derivationally_related_form	01512259	1
03042697	_synset_domain_topic_of	09960688	0
00371846	_derivationally_related_form	01329026	1
00747757	_also_see	01524359	0
02190188	_verb_group	00461493	1
10469346	_hypernym	13752172	0
01582645	_derivationally_related_form	00938419	1
14708720	_synset_domain_topic_of	14292090	0
02272549	_derivationally_related_form	00088481	1
13255145	_instance_hypernym	03773035	0
01233027	_derivationally_related_form	00125436	1
01524359	_also_see	01235258	0
06876309	_hypernym	06873252	1
14374432	_similar_to	05123760	0
06216160	_derivationally_related_form	09957156	1
13345286	_member_meronym	01348174	0
03422589	_hypernym	04494204	1
10168012	_synset_domain_topic_of	13560417	0
00291873	_derivationally_related_form	05018103	1
00716531	_synset_domain_topic_of	00199659	0
01180351	_verb_group	01181295	1
01667607	_derivationally_related_form	07520612	0
00199912	_hypernym	00199659	1
14010148	_instance_hypernym	10426454	0
00205349	_derivationally_related_form	00796976	1
03432129	_verb_group	05042871	0
02748927	_derivationally_related_form	05003590	1
01348174	_member_meronym	00930599	0
09975425	_derivationally_related_form	05638063	1
02839200	_verb_group	10426454	0
01564144	_derivationally_related_form	00217773	1
03042697	_similar_to	00307631	0
05718254	_derivationally_related_form	02135048	1
04904996	_instance_hypernym	03925226	0
02165543	_hypernym	02131279	1
08553535	_similar_to	08559155	0
03282933	_hypernym	03816849	1
01264283	_derivationally_related_form	02378183	0
00150287	_derivationally_related_form	13427078	1
08553535	_verb_group	15286249	0
02471690	_derivationally_related_form	06507041	1
01903756	_verb_group	03520811	0
02568065	_derivationally_related_form	00746587	1
01264283	_member_meronym	00988287	0
01144876	_hypernym	01133281	1
03327841	_hypernym	01168468	0
01453433	_derivationally_related_form	00114871	1
00021766	_also_see	06613686	0
02700455	_verb_group	02659763	1
08282696	_similar_to	08549733	0
02995998	_derivationally_related_form	01458973	1
01767163	_synset_domain_topic_of	03350602	0
00754424	_derivationally_related_form	02574516	1
04592741	_synset_domain_topic_of	02124332	0
13421832	_derivationally_related_form	00724029	1
02155248	_instance_hypernym	10314952	0
05513807	_has_part	05524615	1
02839200	_also_see	04689198	0
03777283	_derivationally_related_form	01743784	1
00579712	_synset_domain_topic_of	02392600	0
11466043	_derivationally_related_form	02333358	1
00566135	_derivationally_related_form	04335435	0
07813107	_hypernym	07809368	1
07458453	_derivationally_related_form	08615374	0
02817650	_derivationally_related_form	01418179	1
03056010	_hypernym	00844298	0
00891936	_derivationally_related_form	06686174	1
00968211	_synset_domain_topic_of	00870453	0
14416845	_hypernym	14373582	1
08553535	_verb_group	14360459	0
07290278	_hypernym	07289956	1
01877204	_hypernym	02409412	0
02992070	_derivationally_related_form	14513259	1
14597413	_instance_hypernym	00479076	0
02689299	_derivationally_related_form	00367976	1
08559155	_similar_to	09782167	0
00995119	_derivationally_related_form	05160796	1
04904996	_verb_group	02155248	0
03793186	_derivationally_related_form	00407633	1
09415938	_derivationally_related_form	13926932	0
01194418	_derivationally_related_form	10186774	1
14597413	_has_part	02124332	0
02459633	_derivationally_related_form	03259505	1
01767163	_has_part	01348174	0
01387301	_derivationally_related_form	03965907	1
07356676	_has_part	00335653	0
01704236	_derivationally_related_form	00545501	1
00843128	_synset_domain_topic_of	07236077	0
01105186	_derivationally_related_form	07120524	1
00747757	_also_see	00438178	0
00998399	_derivationally_related_form	00910203	1
03961939	_has_part	02972533	0
07512465	_derivationally_related_form	02105990	1
02643574	_verb_group	09886010	0
04468005	_member_meronym	02959942	1
01767163	_hypernym	02466496	0
14704966	_derivationally_related_form	01332205	1
04337740	_synset_domain_topic_of	00036362	0
02397460	_derivationally_related_form	15291498	1
07674749	_also_see	01168468	0
01026095	_derivationally_related_form	06885083	1
02051270	_also_see	00021766	0
02741357	_hypernym	02741149	1
10502046	_verb_group	00956250	0
01327301	_derivationally_related_form	00223720	1
02958343	_similar_to	03843555	0
05079638	_hypernym	05074774	1
01235258	_derivationally_related_form	01667607	0
00146572	_derivationally_related_form	00612114	1
10314952	_member_meronym	07182485	0
02593354	_derivationally_related_form	01135795	1
03686658	_synset_domain_topic_of	01679433	0
08893223	_instance_hypernym	09203827	1
01348174	_also_see	07458453	0
02027411	_derivationally_related_form	07959943	1
07356676	_similar_to	01693727	0
10206173	_derivationally_related_form	00819508	1
00385501	_derivationally_related_form	02155248	0
00437125	_derivationally_related_form	00195569	1
10216403	_member_meronym	10610465	0
00401783	_derivationally_related_form	00024814	1
03925226	_also_see	07795598	0
00336539	_derivationally_related_form	09243769	1
09886010	_instance_hypernym	00438178	0
01250335	_derivationally_related_form	02482425	1
04660261	_instance_hypernym	01693727	0
07622061	_has_part	07622261	1
01159025	_has_part	02593001	0
00953923	_hypernym	00953216	1
07172756	_verb_group	10610465	0
01112584	_verb_group	00669970	1
00734927	_instance_hypernym	02839200	0
02693319	_hypernym	02690708	1
07520612	_synset_domain_topic_of	02392600	0
00978549	_derivationally_related_form	07131854	1
10712835	_synset_domain_topic_of	13560417	0
01224744	_derivationally_related_form	10378412	1
03457686	_member_meronym	01877204	0
15129927	_derivationally_related_form	00297906	1
02340360	_has_part	14514039	0
04561734	_hypernym	03309808	1
04858455	_derivationally_related_form	05245192	0
09625401	_derivationally_related_form	02496816	1
01876530	_also_see	00843128	0
00858849	_derivationally_related_form	00016380	1
00199659	_instance_hypernym	00386715	0
08877208	_instance_hypernym	08633957	1
04858455	_also_see	00730499	0
01223182	_hypernym	00140967	1
10426454	_member_meronym	00843128	0
01845720	_derivationally_related_form	10771392	1
02055649	_has_part	02992032	0
00217014	_derivationally_related_form	01619929	1
13282550	_has_part	00844298	0
07410207	_derivationally_related_form	00335923	1
03843555	_synset_domain_topic_of	13423922	0
03051540	_derivationally_related_form	00047945	1
14708720	_member_meronym	14514039	0
02672859	_derivationally_related_form	13529616	1
10426454	_derivationally_related_form	03432129	0
02274482	_derivationally_related_form	00085432	1
00156601	_hypernym	02051270	0
04101701	_hypernym	04574999	1
02972533	_synset_domain_topic_of	00956250	0
05513529	_hypernym	05509146	1
07123870	_derivationally_related_form	15286249	0
01363482	_derivationally_related_form	03875218	1
08878016	_derivationally_related_form	01679433	0
00309115	_derivationally_related_form	01915365	1
01426077	_derivationally_related_form	05245192	0
09757944	_derivationally_related_form	01196037	1
00919424	_hypernym	09483738	0
01233347	_derivationally_related_form	04515129	1
10151570	_member_meronym	00392950	0
01150467	_derivationally_related_form	00172732	1
00730499	_has_part	00021766	0
02742322	_hypernym	03051540	1
04689198	_derivationally_related_form	00438178	0
00203649	_hypernym	00203342	1
00479076	_instance_hypernym	04660261	0
14562324	_derivationally_related_form	01161635	1
04874672	_verb_group	02155248	0
02593001	_hypernym	02575082	1
00263044	_hypernym	03777126	0
10051975	_derivationally_related_form	00416135	1
02702120	_instance_hypernym	02643574	0
10492202	_derivationally_related_form	01453433	1
00734927	_verb_group	00885925	0
00463246	_has_part	00556313	1
00870453	_verb_group	07458453	0
07433145	_derivationally_related_form	02047650	1
15155220	_also_see	08878016	0
01946408	_derivationally_related_form	00351334	1
09960688	_also_see	01841079	0
02225911	_hypernym	02339413	1
04904996	_synset_domain_topic_of	01298283	0
06619065	_derivationally_related_form	02148788	1
00824767	_also_see	02409412	0
10674130	_derivationally_related_form	02534492	1
05706954	_similar_to	09213828	0
06778102	_derivationally_related_form	00853958	1
00799798	_hypernym	01736822	0
07254836	_derivationally_related_form	02227487	1
02051270	_instance_hypernym	00129089	0
02017937	_hypernym	02053941	1
14514039	_member_meronym	00820801	0
00809654	_derivationally_related_form	10022759	1
03457686	_derivationally_related_form	00854393	0
00123234	_derivationally_related_form	01134238	1
01767163	_synset_domain_topic_of	02992032	0
07486229	_derivationally_related_form	01825237	1
07123870	_also_see	07520612	0
02579447	_derivationally_related_form	10257647	1
00956250	_similar_to	00968211	0
00535452	_derivationally_related_form	05070032	1
07795598	_instance_hypernym	15163797	0
02632567	_hypernym	02632353	1
02465939	_instance_hypernym	03843555	0
10569744	_derivationally_related_form	00599472	1
07193184	_verb_group	13315077	0
14607521	_derivationally_related_form	02196690	1
08282696	_similar_to	09213828	0
09960688	_derivationally_related_form	00888786	1
00263044	_has_part	06518068	0
06677302	_hypernym	06359877	1
07575510	_verb_group	06876144	0
03665366	_derivationally_related_form	00291873	1
01976841	_synset_domain_topic_of	03337140	0
09847010	_derivationally_related_form	02317970	1
00392950	_member_meronym	02465939	0
00395797	_derivationally_related_form	00449692	1
00085678	_verb_group	01689379	0
08399586	_derivationally_related_form	02727039	1
00930599	_member_meronym	02051270	0
10645854	_derivationally_related_form	01918803	1
10502046	_verb_group	07674749	0
00051761	_hypernym	00047945	1
02384275	_synset_domain_topic_of	14374432	0
02384275	_derivationally_related_form	07453195	1
13752172	_verb_group	05123760	0
04500060	_derivationally_related_form	02089420	1
03777126	_hypernym	15163797	0
00782057	_derivationally_related_form	10623354	1
03056010	_synset_domain_topic_of	01201856	0
06201136	_derivationally_related_form	10402086	1
00579712	_similar_to	15286249	0
08612049	_hypernym	08616311	1
07073208	_member_meronym	04980656	0
08397255	_derivationally_related_form	01097031	1
02466496	_synset_domain_topic_of	10610465	0
01069980	_derivationally_related_form	01189604	1
01159025	_member_meronym	00824767	0
02384686	_derivationally_related_form	10150940	1
07193184	_similar_to	10426454	0
14578104	_derivationally_related_form	02751597	1
00566135	_instance_hypernym	03056010	0
00759657	_derivationally_related_form	07168131	1
04335435	_verb_group	02281485	0
08057633	_derivationally_related_form	01449974	1
00968211	_verb_group	06518068	0
01091427	_derivationally_related_form	09773245	1
02466496	_similar_to	00870453	0
02836035	_has_part	04283378	1
09415938	_similar_to	09886010	0
01739814	_derivationally_related_form	10078806	1
00885925	_synset_domain_topic_of	10469346	0
04359335	_hypernym	03736970	1
02378183	_has_part	02992032	0
07183151	_hypernym	07181935	1
14374432	_instance_hypernym	08553535	0
01070187	_derivationally_related_form	01189224	1
00129089	_also_see	00930599	0
01083645	_derivationally_related_form	02228698	1
08553535	_has_part	01612295	0
07891726	_hypernym	07884567	1
00335653	_derivationally_related_form	10426454	0
00978173	_derivationally_related_form	06726158	1
00843128	_member_meronym	00161987	0
01843055	_derivationally_related_form	10596689	1
04858455	_similar_to	00867231	0
07176243	_derivationally_related_form	02316649	1
14451911	_synset_domain_topic_of	15255804	0
00060201	_derivationally_related_form	02075049	1
02392600	_also_see	07520612	0
07255174	_hypernym	07205573	1
10168012	_member_meronym	14708720	0
01094086	_derivationally_related_form	09889691	1
00385501	_member_meronym	01877204	0
13480541	_derivationally_related_form	00451838	1
13315077	_synset_domain_topic_of	08615374	0
02000868	_derivationally_related_form	10100124	1
14708720	_verb_group	02465939	0
02406585	_derivationally_related_form	01010458	1
08549733	_hypernym	10168012	0
01580928	_derivationally_related_form	04493505	1
10168012	_instance_hypernym	00479076	0
02517768	_member_meronym	02518488	1
04337740	_instance_hypernym	05042871	0
01469770	_derivationally_related_form	07186148	1
10610465	_has_part	02409412	0
02537407	_hypernym	02575082	1
10152083	_similar_to	00085678	0
10562283	_derivationally_related_form	01275762	1
04435870	_has_part	13752172	0
06767777	_derivationally_related_form	00853958	1
06610436	_verb_group	00385501	0
01486312	_derivationally_related_form	02974697	1
03350602	_has_part	15163797	0
06508816	_derivationally_related_form	01001643	1
04530566	_hypernym	00988287	0
01779165	_also_see	01785748	1
15286249	_verb_group	09782167	0
02487573	_derivationally_related_form	09887850	1
02972533	_instance_hypernym	00824767	0
15266265	_hypernym	15291498	1
06613686	_member_meronym	01736822	0
01238640	_hypernym	01410223	1
01134861	_similar_to	03432129	0
01350699	_hypernym	01223182	1
07193184	_similar_to	01693727	0
09790278	_hypernym	10488016	1
05123760	_verb_group	04435870	0
07961480	_derivationally_related_form	01484714	1
15163797	_instance_hypernym	03042697	0
01101753	_derivationally_related_form	02454649	1
00797430	_member_meronym	10426454	0
00271946	_derivationally_related_form	01159025	1
07795598	_derivationally_related_form	01689379	0
01128655	_hypernym	01128390	1
01264283	_verb_group	02409412	0
00276068	_hypernym	00275843	1
00227165	_synset_domain_topic_of	02155248	0
10203949	_hypernym	10307234	1
00579712	_similar_to	07458453	0
02334867	_derivationally_related_form	02738031	1
00799798	_member_meronym	04530566	0
02278830	_hypernym	02289295	1
08878016	_similar_to	09953965	0
04574999	_derivationally_related_form	01935476	1
03457686	_similar_to	00101191	0
08524130	_hypernym	08523483	1
00328128	_member_meronym	01767163	0
01027508	_derivationally_related_form	06539770	1
03337140	_instance_hypernym	00843128	0
01886407	_also_see	02360448	1
02593354	_also_see	01201856	0
04994413	_hypernym	04992163	1
02409412	_hypernym	07172756	0
04161981	_derivationally_related_form	02701962	1
02193194	_derivationally_related_form	13282550	0
06520944	_derivationally_related_form	00888786	1
10548681	_verb_group	02055649	0
01486312	_hypernym	01587062	1
01976841	_verb_group	08878016	0
01963942	_derivationally_related_form	09869171	1
00885925	_also_see	00438178	0
00205543	_derivationally_related_form	00614057	1
04660261	_has_part	01876530	0
07487955	_hypernym	07484265	1
00307631	_instance_hypernym	03457686	0
09448361	_has_part	09349648	1
02963821	_verb_group	03700963	0
02741960	_derivationally_related_form	00251013	1
01134861	_has_part	10151570	0
00910203	_derivationally_related_form	00998399	1
01169317	_has_part	00885925	0
01628302	_derivationally_related_form	01793177	1
07193184	_member_meronym	13423922	0
00470084	_derivationally_related_form	00231567	1
02055649	_member_meronym	15163797	0
00954271	_derivationally_related_form	07221094	1
03350602	_verb_group	02015598	0
01158181	_derivationally_related_form	10479561	1
01876530	_also_see	07193184	0
03427296	_has_part	03682487	1
02466496	_similar_to	14012667	0
00692907	_derivationally_related_form	01219075	1
01976841	_instance_hypernym	02963821	0
00867231	_derivationally_related_form	06791372	1
01877204	_derivationally_related_form	01168468	0
01844859	_synset_domain_topic_of	00300441	1
07193184	_synset_domain_topic_of	07236077	0
07679356	_derivationally_related_form	01337653	1
01876530	_verb_group	02381571	0
06220616	_derivationally_related_form	10618848	1
02340360	_verb_group	06791372	0
01849746	_derivationally_related_form	05046471	1
07458453	_hypernym	00797430	0
00206927	_derivationally_related_form	02501738	1
05245192	_member_meronym	02055649	0
07255027	_derivationally_related_form	00804476	1
01169317	_member_meronym	01903756	0
00646833	_hypernym	00634276	1
10548681	_synset_domain_topic_of	00799798	0
09354511	_hypernym	08523483	1
07795598	_verb_group	00854393	0
02353844	_synset_domain_topic_of	00610738	1
00870453	_synset_domain_topic_of	03925226	0
00955987	_derivationally_related_form	01116585	1
01159025	_derivationally_related_form	08877208	0
00368302	_derivationally_related_form	00270005	1
06876144	_member_meronym	01134861	0
02460619	_derivationally_related_form	06522501	1
02392600	_instance_hypernym	00438178	0
08463647	_derivationally_related_form	01031256	1
01876530	_hypernym	03686658	0
08552138	_derivationally_related_form	02812482	1
03327841	_hypernym	02593001	0
06502378	_hypernym	06647206	1
04592741	_derivationally_related_form	00876442	0
02418205	_derivationally_related_form	09993901	1
13560417	_hypernym	00438178	0
14562142	_derivationally_related_form	00388635	1
00085678	_verb_group	01689379	0
00056188	_derivationally_related_form	13485408	1
07073208	_member_meronym	01667607	0
05716577	_derivationally_related_form	02337667	1
01524359	_derivationally_related_form	14374432	0
04099969	_has_part	04098513	1
01767163	_instance_hypernym	07182485	0
03875218	_hypernym	03058107	1
02378183	_has_part	02593354	0
05812038	_derivationally_related_form	02676496	1
13255145	_synset_domain_topic_of	01903756	0
01163779	_derivationally_related_form	10069427	1
04337740	_verb_group	00885925	0
08890097	_has_part	08891889	1
01612295	_member_meronym	13926932	0
01097960	_derivationally_related_form	01156438	1
02465939	_has_part	10168012	0
07305234	_derivationally_related_form	01797730	1
14597413	_member_meronym	01976841	0
00095502	_derivationally_related_form	02421374	1
03337140	_synset_domain_topic_of	05706954	0
00877327	_hypernym	00789138	1
02409412	_instance_hypernym	00206927	0
04530566	_has_part	04554211	1
01159025	_instance_hypernym	01159025	0
00064479	_derivationally_related_form	05160796	1
01470225	_synset_domain_topic_of	14374432	0
01485839	_derivationally_related_form	02774152	1
08167779	_similar_to	00386715	0
05750163	_derivationally_related_form	10155849	1
00885925	_similar_to	13423922	0
05162455	_derivationally_related_form	00233335	1
02992032	_hypernym	01264283	0
00263044	_derivationally_related_form	14464203	1
13372123	_has_part	13282550	0
01539633	_synset_domain_topic_of	06084469	1
00263044	_has_part	02378183	0
03817647	_hypernym	04596852	1
01736822	_similar_to	10314952	0
00023383	_also_see	00632438	1
06613686	_has_part	10548681	0
07365193	_hypernym	07365024	1
09960688	_instance_hypernym	01877204	0
07184149	_derivationally_related_form	00774344	1
02381571	_similar_to	10712835	0
00320852	_derivationally_related_form	02502536	1
09415938	_verb_group	07073208	0
00597265	_hypernym	00596807	1
06610436	_synset_domain_topic_of	04951373	0
10433164	_synset_domain_topic_of	02686568	1
00870453	_derivationally_related_form	00156601	0
01112584	_derivationally_related_form	00794367	1
10084635	_derivationally_related_form	14451911	0
00828082	_derivationally_related_form	00048633	1
03056010	_hypernym	14012667	0
02730471	_hypernym	02133435	1
01159025	_hypernym	01570562	0
00956405	_derivationally_related_form	00373544	1
02340360	_similar_to	06791372	0
02764765	_derivationally_related_form	07411645	1
06610436	_derivationally_related_form	02992032	0
00514871	_derivationally_related_form	02446651	1
01689379	_member_meronym	04858455	0
01920932	_derivationally_related_form	00288970	1
00956250	_also_see	13372123	0
00312932	_derivationally_related_form	01846320	1
00930599	_instance_hypernym	13282550	0
01803003	_derivationally_related_form	07519040	1
10151570	_derivationally_related_form	10151570	0
02462580	_derivationally_related_form	00182213	1
06610436	_hypernym	02593001	0
00690501	_hypernym	00671351	1
07458453	_also_see	10314952	0
03302938	_has_part	04218564	1
01426077	_derivationally_related_form	13282550	0
00138508	_derivationally_related_form	00346693	1
06791372	_similar_to	07236077	0
02149302	_derivationally_related_form	14574846	1
02643574	_also_see	05706954	0
00901799	_derivationally_related_form	06397903	1
03520811	_synset_domain_topic_of	02465939	0
00512749	_derivationally_related_form	02468864	1
08890097	_hypernym	01689379	0
00358431	_derivationally_related_form	13962498	1
00799798	_has_part	04904996	0
00989602	_derivationally_related_form	07071483	1
01348174	_derivationally_related_form	03961939	0
02075049	_hypernym	02009433	1
01667607	_also_see	15286249	0
15152817	_derivationally_related_form	09605289	1
02958343	_instance_hypernym	09483738	0
00536304	_similar_to	00535452	1
07193184	_hypernym	00820801	0
00218208	_hypernym	00217014	1
04019101	_member_meronym	00885925	0
05696020	_derivationally_related_form	00456596	1
03350602	_has_part	02593354	0
01474550	_derivationally_related_form	00212808	1
07182485	_synset_domain_topic_of	10314952	0
09814660	_derivationally_related_form	01011031	1
08553535	_verb_group	00876442	0
02806261	_derivationally_related_form	01202728	1
00854393	_verb_group	00786458	0
00894552	_derivationally_related_form	00606335	1
01168468	_has_part	02593001	0
00234892	_derivationally_related_form	00138508	1
06791372	_verb_group	00392950	0
02421921	_hypernym	02421374	1
13345286	_verb_group	03327841	0
04080454	_derivationally_related_form	02175958	1
00843128	_instance_hypernym	00876442	0
10013242	_derivationally_related_form	01167981	1
04530566	_has_part	02593354	0
04989657	_derivationally_related_form	02009280	1
00930599	_derivationally_related_form	00101191	0
00593108	_derivationally_related_form	10474645	1
08282696	_instance_hypernym	01667607	0
00524530	_derivationally_related_form	00386392	1
02124332	_has_part	03520811	0
00257770	_derivationally_related_form	00037919	1
03843555	_derivationally_related_form	13255145	0
07308889	_derivationally_related_form	02155493	1
00786458	_member_meronym	01168468	0
07129202	_derivationally_related_form	01054186	1
04689198	_instance_hypernym	09213828	0
00952182	_hypernym	00978549	1
04337740	_similar_to	02958343	0
00483801	_derivationally_related_form	14417146	1
00930599	_verb_group	03925226	0
01217780	_derivationally_related_form	00406800	1
03700963	_derivationally_related_form	13255145	0
01675963	_derivationally_related_form	03579355	1
02972533	_instance_hypernym	13372123	0
01979901	_derivationally_related_form	00052500	1
09953965	_verb_group	03843555	0
00870453	_derivationally_related_form	01385170	1
02963821	_member_meronym	09415938	0
01686956	_derivationally_related_form	03931044	1
10152083	_has_part	00227165	0
00747135	_derivationally_related_form	09824135	1
13255145	_similar_to	01667607	0
07578363	_has_part	07578879	1
07236077	_derivationally_related_form	13390857	0
00323856	_synset_domain_topic_of	00243918	1
10084635	_has_part	03961939	0
04956594	_derivationally_related_form	09938672	1
10151570	_hypernym	00438178	0
06207561	_derivationally_related_form	01778568	1
00988287	_derivationally_related_form	00129089	0
00990249	_hypernym	00989201	1
10548681	_has_part	07674749	0
02542280	_derivationally_related_form	01203676	1
00747757	_has_part	03773035	0
01415807	_derivationally_related_form	01160729	1
08549733	_verb_group	03843555	0
01224517	_hypernym	01224031	1
00328128	_has_part	00307631	0
01143838	_verb_group	02092309	1
00919424	_member_meronym	03520811	0
07269916	_derivationally_related_form	02851550	1
01689379	_verb_group	10084635	0
00512843	_derivationally_related_form	00854150	1
00876442	_instance_hypernym	01612295	0
07129202	_hypernym	07128946	1
15255804	_synset_domain_topic_of	02051270	0
00282076	_derivationally_related_form	04695176	1
00335653	_has_part	00734927	0
00611972	_derivationally_related_form	10450303	1
03042697	_derivationally_related_form	02409412	0
02388143	_hypernym	02382948	1
00786458	_also_see	00968211	0
02764765	_hypernym	02763740	1
06791372	_similar_to	01169317	0
01300437	_derivationally_related_form	03879116	1
00867231	_synset_domain_topic_of	14451911	0
00752493	_also_see	02486693	1
00479076	_derivationally_related_form	10168012	0
05036394	_derivationally_related_form	00290302	1
03777126	_synset_domain_topic_of	00263044	0
00413876	_derivationally_related_form	10583387	1
02593354	_synset_domain_topic_of	00385501	0
01852701	_derivationally_related_form	08521816	1
01667607	_also_see	07123870	0
01959294	_also_see	02371718	1
09782167	_has_part	04980656	0
07445896	_derivationally_related_form	02689299	1
03773035	_hypernym	00335653	0
14818238	_hypernym	14806838	1
13926932	_member_meronym	04019101	0
13573666	_derivationally_related_form	00459114	1
00747757	_hypernym	00335653	0
02582042	_derivationally_related_form	06556692	1
00263044	_similar_to	02193765	0
00949974	_derivationally_related_form	00122106	1
02193765	_verb_group	05245192	0
01955984	_hypernym	01841079	1
00479076	_similar_to	00036362	0
10646325	_derivationally_related_form	08440630	1
15163797	_member_meronym	02281485	0
04574999	_derivationally_related_form	01887020	1
00199659	_synset_domain_topic_of	01689379	0
00263947	_derivationally_related_form	00510364	1
02193765	_has_part	00385501	0
13877918	_hypernym	13907415	1
14360459	_similar_to	03773035	0
11465017	_derivationally_related_form	01902783	1
01348174	_hypernym	03777126	0
04837931	_derivationally_related_form	01352067	1
09886010	_instance_hypernym	08553535	0
10468559	_derivationally_related_form	02984104	1
00101191	_verb_group	00799798	0
06522501	_derivationally_related_form	02460619	1
00797430	_instance_hypernym	04337740	0
02958343	_has_part	04294614	1
06518068	_also_see	04858455	0
00414179	_hypernym	00413239	1
00730499	_derivationally_related_form	02051270	0
01542207	_derivationally_related_form	15049594	1
00956250	_hypernym	01736822	0
01680132	_derivationally_related_form	01896031	1
14514039	_member_meronym	00579712	0
02829696	_derivationally_related_form	02033137	1
02593001	_also_see	01348174	0
10216106	_derivationally_related_form	02271137	1
10314952	_instance_hypernym	02091165	0
02502916	_derivationally_related_form	05790572	1
06876144	_similar_to	00734927	0
04188368	_synset_domain_topic_of	00314469	1
10216403	_derivationally_related_form	09960688	0
01167780	_derivationally_related_form	03200357	1
00930599	_has_part	02055649	0
02269894	_hypernym	01143838	1
00566135	_instance_hypernym	04858455	0
01128655	_derivationally_related_form	00579712	1
07193184	_synset_domain_topic_of	01976841	0
01535246	_derivationally_related_form	00255710	1
01689379	_derivationally_related_form	02378183	0
01234345	_derivationally_related_form	00421535	1
03686658	_member_meronym	09886010	0
14541852	_derivationally_related_form	01036319	1
00579712	_verb_group	03773035	0
03701391	_hypernym	02760429	1
02972533	_similar_to	01570562	0
04952242	_derivationally_related_form	00278551	1
00350889	_hypernym	01298283	0
00036178	_verb_group	00036362	1
08890097	_hypernym	01570562	0
01593254	_derivationally_related_form	03659292	1
03337140	_has_part	06876144	0
02153709	_derivationally_related_form	00945401	1
07073208	_member_meronym	07073208	0
07500414	_derivationally_related_form	02400037	1
01612295	_similar_to	01679433	0
09448361	_derivationally_related_form	09415938	1
13282550	_derivationally_related_form	02055649	0
00796315	_derivationally_related_form	00065791	1
06876144	_has_part	07458453	0
13344071	_hypernym	13329641	1
00199659	_member_meronym	00385501	0
00788766	_hypernym	00786195	1
02384275	_instance_hypernym	13560417	0
01639105	_derivationally_related_form	09935233	1
01524359	_derivationally_related_form	10469346	0
06843520	_derivationally_related_form	01589056	1
00663160	_also_see	05042871	0
09892831	_derivationally_related_form	02447001	1
03042697	_also_see	10314952	0
00073343	_derivationally_related_form	10000007	1
00328128	_verb_group	00263044	0
03061505	_hypernym	03079741	1
00385501	_derivationally_related_form	14012667	0
00946105	_derivationally_related_form	06482401	1
00101191	_synset_domain_topic_of	04951373	0
14479615	_synset_domain_topic_of	06084469	1
01298283	_also_see	03056010	0
01526521	_hypernym	01525720	1
00307631	_hypernym	00227165	0
00341695	_derivationally_related_form	01506583	1
05042871	_instance_hypernym	00876442	0
01168569	_derivationally_related_form	01072262	1
04951373	_similar_to	08167779	0
06181584	_hypernym	06172789	1
02378183	_instance_hypernym	05833252	0
02686568	_has_part	02932019	1
02593354	_also_see	01570562	0
07368256	_derivationally_related_form	00363493	1
06613686	_derivationally_related_form	03350602	0
14374432	_synset_domain_topic_of	06055946	1
01264283	_also_see	02015598	0
09827683	_hypernym	09918248	1
00392950	_member_meronym	00734927	0
08871007	_has_part	08881674	1
02963821	_instance_hypernym	13315077	0
09867956	_hypernym	10054657	1
07182485	_member_meronym	10216403	0
01233993	_derivationally_related_form	10538272	1
02392600	_verb_group	02839200	0
00311338	_derivationally_related_form	07331013	1
02958343	_synset_domain_topic_of	13255145	0
00338071	_derivationally_related_form	07409121	1
10426454	_instance_hypernym	07073208	0
00074038	_derivationally_related_form	10000007	1
03042697	_member_meronym	00350889	0
04213626	_hypernym	04362025	1
05245192	_hypernym	01841079	0
01037910	_derivationally_related_form	00512522	1
02015598	_verb_group	07172756	0
00796392	_derivationally_related_form	06542047	1
10426454	_verb_group	02839200	0
13857486	_hypernym	13854649	1
13255145	_synset_domain_topic_of	00820801	0
01881180	_derivationally_related_form	10660729	1
00199659	_verb_group	00870453	0
05913275	_derivationally_related_form	01426077	1
08878016	_derivationally_related_form	08282696	0
00052043	_hypernym	00047945	1
10314952	_derivationally_related_form	02051270	0
01688771	_derivationally_related_form	00900957	1
00101191	_verb_group	03961939	0
02544348	_derivationally_related_form	10072708	1
00206927	_derivationally_related_form	06610436	0
10502576	_derivationally_related_form	02059462	1
01235258	_instance_hypernym	04435870	0
07127006	_derivationally_related_form	00031820	1
00479076	_synset_domain_topic_of	07520612	0
02227487	_derivationally_related_form	07254594	1
01877204	_derivationally_related_form	00307631	0
15184170	_hypernym	15183802	1
15255804	_derivationally_related_form	02015598	0
01904293	_verb_group	01874568	1
13560417	_has_part	02384275	0
01955984	_derivationally_related_form	10403876	1
01201856	_has_part	00263044	0
09889941	_hypernym	10744164	1
00956250	_instance_hypernym	00716531	0
14292090	_derivationally_related_form	00336260	1
03337140	_instance_hypernym	01134861	0
02828648	_hypernym	03519981	1
00824767	_hypernym	04335435	0
01128071	_derivationally_related_form	04051825	1
04337740	_instance_hypernym	07123870	0
10298912	_derivationally_related_form	00595146	1
00747757	_hypernym	10151570	0
13757249	_derivationally_related_form	01919711	1
09886010	_instance_hypernym	13390857	0
10369955	_derivationally_related_form	01126360	1
02281485	_instance_hypernym	04335435	0
00730301	_derivationally_related_form	08512736	1
02392600	_synset_domain_topic_of	00734927	0
00189565	_derivationally_related_form	02525312	1
07073208	_verb_group	09415938	0
02079933	_derivationally_related_form	11512818	1
01201856	_hypernym	03777126	0
02058794	_also_see	02523275	1
06876144	_derivationally_related_form	02839200	0
00470084	_derivationally_related_form	00233386	1
07123870	_verb_group	09415938	0
06778102	_derivationally_related_form	10224098	1
00438178	_instance_hypernym	05123760	0
00617989	_derivationally_related_form	01233993	1
10712835	_verb_group	07123870	0
01354006	_derivationally_related_form	04159354	1
00206927	_derivationally_related_form	04530566	0
13417410	_hypernym	13416345	1
05123760	_instance_hypernym	07356676	0
02991122	_derivationally_related_form	02743547	1
04874672	_member_meronym	04951373	0
01016778	_derivationally_related_form	09814660	1
10216403	_hypernym	14012667	0
01912159	_derivationally_related_form	10727016	1
10314952	_verb_group	01426077	0
05064037	_derivationally_related_form	01689752	1
15163797	_member_meronym	07172756	0
01826723	_derivationally_related_form	14038993	1
06610436	_synset_domain_topic_of	04335435	0
00747757	_derivationally_related_form	01352067	1
02281485	_member_meronym	06613686	0
01248191	_derivationally_related_form	02502536	1
00479076	_member_meronym	00438178	0
10678472	_hypernym	10525134	1
02409412	_instance_hypernym	00307631	0
08253815	_derivationally_related_form	01167981	1
10152083	_hypernym	02378183	0
00046534	_derivationally_related_form	00828237	1
10314952	_instance_hypernym	10314952	0
06767777	_derivationally_related_form	01058880	1
01298283	_derivationally_related_form	09960688	0
02518990	_hypernym	01432517	1
01841079	_instance_hypernym	00854393	0
00161739	_derivationally_related_form	01696648	1
10712835	_has_part	01235258	0
06624161	_has_part	07012534	1
02593354	_similar_to	03350602	0
14455206	_derivationally_related_form	01088749	1
00335653	_derivationally_related_form	04980656	0
00274941	_derivationally_related_form	00281101	1
00579712	_verb_group	02963821	0
14490110	_derivationally_related_form	02348182	1
04858455	_similar_to	00786458	0
01414288	_derivationally_related_form	00133338	1
03925226	_has_part	01201856	0
10180580	_derivationally_related_form	01116585	1
01767163	_synset_domain_topic_of	14451911	0
02744977	_derivationally_related_form	06892016	1
06876144	_instance_hypernym	04689198	0
06615561	_derivationally_related_form	01505254	1
07795598	_derivationally_related_form	02593354	0
02066939	_derivationally_related_form	07405893	1
10151570	_member_meronym	02124332	0
05913275	_derivationally_related_form	01022906	1
08282696	_has_part	00734927	0
02559199	_derivationally_related_form	10008716	1
02702120	_synset_domain_topic_of	08282696	0
14574846	_derivationally_related_form	00864159	1
04335435	_member_meronym	00129089	0
10570019	_derivationally_related_form	00599472	1
00786458	_hypernym	02193194	0
04473432	_has_part	03671473	1
01186428	_also_see	07172756	0
10792856	_hypernym	10241300	1
03925226	_derivationally_related_form	10216403	0
01236795	_hypernym	01236164	1
09415938	_has_part	10151570	0
01350699	_derivationally_related_form	00404726	1
08890097	_also_see	00350889	0
08543081	_hypernym	08523483	1
14451911	_hypernym	03777126	0
05981230	_derivationally_related_form	00708980	1
04980656	_instance_hypernym	00747757	0
02733122	_verb_group	02202928	1
07520612	_hypernym	00335653	0
00788184	_derivationally_related_form	07193184	1
00843128	_has_part	09483738	0
04175380	_hypernym	04381994	1
01877204	_synset_domain_topic_of	01348174	0
06554981	_derivationally_related_form	02273293	1
05245192	_instance_hypernym	10548681	0
02544348	_derivationally_related_form	14541852	1
08549733	_derivationally_related_form	00663160	0
00281101	_derivationally_related_form	00274941	1
00876442	_member_meronym	10151570	0
01362736	_derivationally_related_form	00717208	1
03520811	_derivationally_related_form	00375071	0
01000214	_derivationally_related_form	10516874	1
00734927	_member_meronym	00438178	0
00695523	_derivationally_related_form	01179707	1
08167779	_synset_domain_topic_of	00968211	0
00433232	_hypernym	00156601	1
10469346	_instance_hypernym	08549733	0
06275634	_hypernym	06253690	1
00566135	_hypernym	06610436	0
00036362	_derivationally_related_form	00255710	1
01159025	_verb_group	02055649	0
02064131	_derivationally_related_form	08182716	1
02839200	_also_see	03773035	0
00852506	_hypernym	00851933	1
02702120	_similar_to	01876530	0
02228698	_derivationally_related_form	01083645	1
00870453	_also_see	15255804	0
02774630	_hypernym	02974697	1
00747757	_instance_hypernym	09953965	0
10682380	_derivationally_related_form	01011031	1
15163797	_member_meronym	13282550	0
00775831	_derivationally_related_form	00202284	1
00885925	_has_part	09782167	0
01421622	_derivationally_related_form	03573282	1
01159025	_similar_to	01877204	0
00768778	_derivationally_related_form	10775379	1
04335435	_similar_to	00844298	0
03401721	_hypernym	03294048	1
07674749	_derivationally_related_form	00199659	0
10182499	_derivationally_related_form	08078020	1
10548681	_derivationally_related_form	01298283	0
01097500	_derivationally_related_form	01157850	1
01876530	_hypernym	00579712	0
10012815	_derivationally_related_form	00650016	1
07172756	_similar_to	02992032	0
00850192	_derivationally_related_form	10561320	1
03042697	_member_meronym	13372123	0
00095971	_derivationally_related_form	00384620	1
08878016	_derivationally_related_form	00392950	0
02136271	_synset_domain_topic_of	06094774	1
02839200	_verb_group	04980656	0
14539960	_hypernym	14539268	1
00843128	_similar_to	04660261	0
00046109	_derivationally_related_form	00299580	1
00085678	_has_part	01841079	0
00828779	_also_see	01716227	1
15163797	_derivationally_related_form	02992032	0
02355596	_hypernym	01111816	1
00930599	_instance_hypernym	00988287	0
00754731	_hypernym	00752764	1
01903756	_member_meronym	01693727	0
00748515	_derivationally_related_form	01172275	1
14012667	_also_see	03925226	0
01158596	_derivationally_related_form	14708720	1
10216403	_member_meronym	01348174	0
01392080	_derivationally_related_form	01896031	1
02643574	_hypernym	04337740	0
00331655	_derivationally_related_form	01864634	1
06518068	_synset_domain_topic_of	02992032	0
00650016	_derivationally_related_form	05748054	1
13282550	_derivationally_related_form	07458453	0
02970685	_has_part	04162706	1
13282550	_similar_to	03961939	0
10008716	_derivationally_related_form	00388635	1
00820801	_has_part	09782167	0
04692157	_derivationally_related_form	00263044	1
02992032	_instance_hypernym	00199659	0
13416345	_derivationally_related_form	02262139	1
04530566	_verb_group	04335435	0
06790042	_hypernym	06789411	1
10084635	_derivationally_related_form	10314952	0
07354731	_derivationally_related_form	01111028	1
00101191	_has_part	00870453	0
01457954	_derivationally_related_form	13534274	1
01470225	_instance_hypernym	02381571	0
14868243	_hypernym	14580897	1
15163797	_hypernym	00263044	0
02531625	_derivationally_related_form	00636461	1
00870453	_verb_group	00199659	0
01785971	_derivationally_related_form	00758972	1
00375071	_has_part	07575510	0
02531422	_also_see	01076793	1
02958343	_derivationally_related_form	04689198	0
10191192	_hypernym	10557854	1
02055649	_synset_domain_topic_of	07182485	0
02984104	_derivationally_related_form	10467395	1
00021766	_synset_domain_topic_of	02378183	0
07129202	_derivationally_related_form	01055404	1
00385501	_verb_group	02015598	0
02120458	_derivationally_related_form	04648207	1
00919424	_has_part	13255145	0
08954057	_instance_hypernym	09203827	1
00335653	_verb_group	00885925	0
08161068	_hypernym	08160276	1
15286249	_member_meronym	02340360	0
01532589	_derivationally_related_form	09927089	1
01524359	_instance_hypernym	10426454	0
00386392	_also_see	00404202	1
01667607	_member_meronym	14292090	0
00550117	_derivationally_related_form	00196084	1
01186428	_has_part	00328128	0
01029500	_derivationally_related_form	06343520	1
04689198	_instance_hypernym	14292090	0
07407777	_derivationally_related_form	01377032	1
00988287	_instance_hypernym	01298283	0
[truncated: 858 more rows]
