# Supplementary material
Source: ML conference proceedings conference paper supplement (https://proceedings.neurips.cc/paper_files/paper/2021/hash/0fd600c953cde8121262e322ef09f70e-Abstract.html)
Supplement: Supplementary file 1 [file 0fd600c953cde8121262e322ef09f70e-Supplemental.zip › Supplementary_Material_Paper_8745/data/GraIL-BM_WN18RR_v4/test/test-random-sample/test6.txt]

00365647	_derivationally_related_form	07313241	1
00312784	_member_meronym	00311338	0
02641957	_hypernym	02641463	1
10753182	_hypernym	01313411	0
03931044	_derivationally_related_form	02861617	1
02044866	_also_see	03032811	0
13573666	_hypernym	13575433	1
02839200	_also_see	01667607	0
10155849	_derivationally_related_form	05256862	1
14538472	_similar_to	06634239	0
00971463	_derivationally_related_form	00222472	1
00328128	_instance_hypernym	03457686	0
04281375	_hypernym	04014297	1
00156601	_similar_to	02193194	0
00317888	_derivationally_related_form	01018366	1
01612295	_has_part	07236077	0
02100709	_derivationally_related_form	10227266	1
00599472	_hypernym	01904293	0
00311338	_derivationally_related_form	00218208	1
13319726	_similar_to	02261888	0
01019524	_derivationally_related_form	01693881	1
00045646	_synset_domain_topic_of	02851099	0
01954852	_hypernym	01953810	1
01169067	_synset_domain_topic_of	02668523	0
00405079	_derivationally_related_form	00140393	1
02749247	_member_meronym	04183329	0
01053144	_derivationally_related_form	05714894	1
01134861	_has_part	00161987	0
01002740	_derivationally_related_form	00907919	1
00667942	_member_meronym	04359335	0
04336034	_derivationally_related_form	00220869	1
10610465	_synset_domain_topic_of	02155248	0
03497657	_derivationally_related_form	02363128	1
10451590	_derivationally_related_form	01844859	0
05064037	_hypernym	05062748	1
07236077	_hypernym	07356676	0
06262567	_derivationally_related_form	01711965	1
06400271	_instance_hypernym	13255145	0
08620061	_hypernym	00027167	1
08877208	_member_meronym	01736822	0
00139908	_synset_domain_topic_of	00243918	1
04019101	_member_meronym	04019101	0
10695555	_derivationally_related_form	01803380	1
01977701	_verb_group	13497135	0
00300537	_derivationally_related_form	10093908	1
14597158	_derivationally_related_form	00581812	0
10261388	_derivationally_related_form	01950502	1
14597413	_member_meronym	09483738	0
15273626	_derivationally_related_form	00015498	1
02377938	_hypernym	13903387	0
00748011	_hypernym	00747029	1
14974264	_derivationally_related_form	07338114	0
00153961	_derivationally_related_form	00665886	1
02384275	_derivationally_related_form	10168012	0
01124794	_derivationally_related_form	02442205	1
03061674	_similar_to	02702830	0
00775156	_derivationally_related_form	07184149	1
05762149	_also_see	01150559	0
02995998	_derivationally_related_form	02047263	1
01024392	_hypernym	10183757	0
13864763	_derivationally_related_form	02047807	1
04359335	_member_meronym	01122601	0
01177703	_derivationally_related_form	02521816	1
00867231	_also_see	01264283	0
02828648	_derivationally_related_form	00811171	1
09782167	_has_part	08549733	0
04353803	_derivationally_related_form	00949288	1
00171586	_instance_hypernym	01743784	0
06589574	_has_part	06258031	1
10467395	_also_see	09790278	0
02454649	_hypernym	02454312	1
02466496	_verb_group	03056010	0
02567147	_derivationally_related_form	01170813	1
01679433	_derivationally_related_form	00375071	0
00828779	_derivationally_related_form	04997472	1
00931721	_instance_hypernym	11499817	0
02833576	_derivationally_related_form	01884577	1
10690849	_has_part	00403401	0
00600370	_derivationally_related_form	05700087	1
02473431	_member_meronym	08167953	0
01203715	_derivationally_related_form	10470460	1
02644234	_verb_group	01204191	0
01665638	_derivationally_related_form	09963320	1
00329227	_has_part	00286605	0
02045043	_verb_group	02045790	1
01135529	_synset_domain_topic_of	01451842	0
04586421	_derivationally_related_form	01522276	1
02473431	_member_meronym	03519981	0
02159117	_hypernym	02153959	1
05768806	_hypernym	02861617	0
02958126	_derivationally_related_form	06946497	1
00438178	_verb_group	00036362	0
14064644	_hypernym	14064408	1
00799798	_member_meronym	03350602	0
03194812	_hypernym	03851341	1
02440020	_instance_hypernym	00700652	0
01798452	_derivationally_related_form	14376188	1
04115456	_member_meronym	10388440	0
00458754	_derivationally_related_form	13575433	1
00392950	_member_meronym	07356676	0
02523784	_verb_group	02523521	1
08578706	_has_part	04183329	0
00702226	_derivationally_related_form	04438304	1
03350602	_hypernym	00988287	0
07255299	_hypernym	07255174	1
13935227	_has_part	01215694	0
01790383	_derivationally_related_form	04904996	1
00730301	_hypernym	02049190	0
02156546	_derivationally_related_form	10746346	1
00931721	_similar_to	02453321	0
06883073	_hypernym	06882561	1
01451842	_also_see	00593108	0
01126856	_derivationally_related_form	02427916	1
10502046	_has_part	00021766	0
14425974	_derivationally_related_form	01493897	1
02465939	_also_see	08559155	0
00557588	_derivationally_related_form	01080064	1
01405044	_verb_group	13342987	0
01051956	_derivationally_related_form	10034785	1
01496978	_also_see	05083328	0
00356790	_derivationally_related_form	01389329	1
00456596	_has_part	08548733	0
04780958	_derivationally_related_form	00908672	1
01907258	_hypernym	02520147	0
02748927	_derivationally_related_form	02681518	1
00747757	_verb_group	07356676	0
13887509	_hypernym	13910384	1
03302938	_member_meronym	02059916	0
01363482	_derivationally_related_form	00717208	1
05044822	_instance_hypernym	01540693	0
07620327	_hypernym	07612632	1
08549733	_also_see	05527216	0
00891936	_derivationally_related_form	10149527	1
01010334	_verb_group	02629256	0
10380672	_derivationally_related_form	07072698	1
06099269	_derivationally_related_form	08322981	0
01036804	_derivationally_related_form	06608143	1
10469346	_instance_hypernym	10168012	0
00368302	_derivationally_related_form	02043190	1
01405044	_has_part	09999795	0
02577877	_derivationally_related_form	05695232	1
02281485	_member_meronym	10502046	0
01168569	_derivationally_related_form	01122194	1
10712835	_member_meronym	01679433	0
07143137	_derivationally_related_form	00876442	1
00208497	_synset_domain_topic_of	03519981	0
00308370	_derivationally_related_form	01843055	1
05527216	_member_meronym	03965907	0
01904293	_derivationally_related_form	11527967	1
13556509	_similar_to	04821451	0
01460029	_derivationally_related_form	01254051	1
03274561	_member_meronym	02629256	0
00043683	_hypernym	00044149	1
09415938	_derivationally_related_form	13926932	0
13777764	_hypernym	05074774	1
02466496	_instance_hypernym	01570562	0
10213180	_derivationally_related_form	00808855	1
02963821	_also_see	10426454	0
14706026	_derivationally_related_form	00261533	1
00579712	_verb_group	01693727	0
01076046	_derivationally_related_form	00362348	1
07313814	_member_meronym	02677718	0
05905348	_hypernym	05902545	1
02536329	_member_meronym	02396205	0
10492202	_derivationally_related_form	01454636	1
01169067	_similar_to	00329227	0
13464204	_derivationally_related_form	00208497	1
00854393	_synset_domain_topic_of	00328128	0
14477667	_hypernym	14477342	1
01159025	_also_see	10548681	0
02001858	_derivationally_related_form	07883860	1
01721556	_has_part	00629257	0
01061481	_derivationally_related_form	00943363	1
07207410	_synset_domain_topic_of	10467395	0
02047650	_derivationally_related_form	13878112	1
01426077	_instance_hypernym	00328128	0
05694791	_derivationally_related_form	01807529	1
14974264	_also_see	01985029	0
15046900	_derivationally_related_form	00445169	1
07351612	_has_part	01721556	0
02028994	_derivationally_related_form	05088324	1
00854393	_member_meronym	02409412	0
02237024	_derivationally_related_form	14875077	1
04008385	_has_part	13983304	0
01015104	_hypernym	01014821	1
03521076	_hypernym	07884567	0
00627410	_derivationally_related_form	04761517	1
10426454	_derivationally_related_form	14538472	0
04081281	_hypernym	02913152	1
07172756	_synset_domain_topic_of	06518068	0
02400037	_derivationally_related_form	07500414	1
08311933	_hypernym	03521076	0
01097960	_derivationally_related_form	00045646	1
03881534	_hypernym	00590148	0
01582645	_derivationally_related_form	00263813	1
13903387	_also_see	02066939	0
02671279	_verb_group	02502536	1
00863433	_has_part	06400271	0
01821266	_derivationally_related_form	14481929	1
08548733	_has_part	08543081	0
00605310	_hypernym	00605086	1
02829696	_synset_domain_topic_of	00045646	0
01643464	_derivationally_related_form	10029068	1
01451842	_also_see	01163847	0
10214062	_derivationally_related_form	01993352	1
07148192	_instance_hypernym	01711445	0
02702120	_hypernym	01116585	1
01903756	_similar_to	14292090	0
02124106	_also_see	02126022	1
00328128	_hypernym	02593354	0
05088056	_derivationally_related_form	00968211	1
00368592	_verb_group	02148109	0
13877918	_derivationally_related_form	00362128	1
10314952	_member_meronym	07182485	0
01701311	_derivationally_related_form	06376154	1
00492677	_synset_domain_topic_of	00365709	0
05513807	_has_part	05514905	1
01679433	_also_see	09810364	0
08612786	_derivationally_related_form	01582645	1
01904293	_also_see	04019101	0
03845360	_derivationally_related_form	14966667	1
00368592	_derivationally_related_form	00286605	0
07223170	_derivationally_related_form	01041954	1
07350192	_synset_domain_topic_of	07351612	0
00173764	_also_see	01452593	1
01168468	_also_see	00867231	0
01385170	_derivationally_related_form	07373803	1
10032342	_similar_to	03330947	0
10003283	_derivationally_related_form	02212825	1
01985029	_derivationally_related_form	13556509	0
08554440	_hypernym	08553535	1
02593354	_hypernym	00844298	0
02812482	_derivationally_related_form	08493064	1
01466978	_also_see	08549733	0
00795008	_derivationally_related_form	00047317	1
00747757	_member_meronym	01976841	0
03872495	_derivationally_related_form	01526956	1
00956250	_hypernym	00854393	0
01660640	_derivationally_related_form	03792334	1
00885925	_synset_domain_topic_of	00734927	0
14543552	_derivationally_related_form	01036319	1
00629257	_synset_domain_topic_of	00164579	0
04836074	_derivationally_related_form	00884778	1
00542809	_verb_group	06516595	0
10155849	_derivationally_related_form	07066659	1
01134861	_has_part	00885925	0
07181935	_derivationally_related_form	00869126	1
03521076	_instance_hypernym	00209546	0
01140794	_derivationally_related_form	02512053	1
07294019	_synset_domain_topic_of	01789270	0
00432839	_derivationally_related_form	13556509	1
10610465	_verb_group	03350602	0
08046759	_instance_hypernym	08392137	1
01105186	_derivationally_related_form	04405540	0
08691669	_hypernym	08524735	1
02686625	_has_part	00542809	0
07254594	_derivationally_related_form	02379198	1
00183505	_has_part	04770911	0
14562683	_hypernym	14561618	1
01688256	_has_part	02784218	0
04530566	_has_part	04544805	1
05728678	_member_meronym	04497005	0
10690849	_derivationally_related_form	00850501	1
08322981	_has_part	06669384	0
01268457	_derivationally_related_form	14974264	1
02784218	_verb_group	02536329	0
01189224	_derivationally_related_form	07561112	1
14560360	_has_part	15163005	0
01840238	_synset_domain_topic_of	00300441	1
13752172	_has_part	01169317	0
00436879	_hypernym	00437125	1
00191980	_hypernym	13298011	0
14562324	_derivationally_related_form	01566490	1
05044822	_member_meronym	02861617	0
00566322	_derivationally_related_form	10787470	1
02124332	_also_see	00335653	0
10380672	_derivationally_related_form	00828901	1
00820801	_member_meronym	01169317	0
14515463	_derivationally_related_form	02225492	1
09213828	_similar_to	14374432	0
04096066	_derivationally_related_form	01952750	1
01010334	_derivationally_related_form	01856626	0
02958343	_has_part	03327841	1
00581812	_also_see	10782791	0
06893885	_derivationally_related_form	01711445	1
00390842	_derivationally_related_form	02536329	0
06056923	_hypernym	06055946	1
00024814	_has_part	06516595	0
02701445	_derivationally_related_form	04236001	1
02409412	_member_meronym	00129089	0
02025009	_derivationally_related_form	08274565	1
01235258	_synset_domain_topic_of	08559155	0
13898315	_hypernym	13897996	1
02422026	_verb_group	06696483	0
01646941	_also_see	01640850	1
03216562	_member_meronym	01149470	0
00946105	_derivationally_related_form	05817845	1
01163847	_verb_group	06778102	0
02045790	_derivationally_related_form	02939919	1
01591158	_also_see	07207273	0
00085432	_hypernym	00088481	1
02974219	_verb_group	02355596	0
10229498	_derivationally_related_form	02202928	1
04441528	_instance_hypernym	00191980	0
02020413	_derivationally_related_form	14452616	1
00748515	_similar_to	06722186	0
00854420	_derivationally_related_form	00752431	1
03925226	_synset_domain_topic_of	01159025	0
00746232	_derivationally_related_form	02568065	1
00884778	_similar_to	04939324	0
15101854	_derivationally_related_form	01180701	1
15163797	_synset_domain_topic_of	01180975	0
00897564	_derivationally_related_form	09769345	1
01470225	_has_part	10712835	0
13424183	_derivationally_related_form	02765464	1
08877208	_derivationally_related_form	08167779	0
01111816	_derivationally_related_form	00043902	1
14597413	_has_part	07193184	0
00321486	_derivationally_related_form	03873064	1
00251013	_also_see	02702830	0
02537407	_derivationally_related_form	10206173	1
02355596	_verb_group	06556692	0
01475831	_also_see	01483324	1
00459114	_verb_group	08618379	0
01273814	_hypernym	01356370	1
14425103	_instance_hypernym	07237758	0
09349648	_derivationally_related_form	01882814	1
00335653	_has_part	07520612	0
04446521	_has_part	04447861	1
10256080	_derivationally_related_form	07377473	0
01215694	_hypernym	02339413	1
03700963	_verb_group	07458453	0
07557165	_hypernym	07570720	1
13889843	_instance_hypernym	02829696	0
02487573	_derivationally_related_form	10757193	1
03521076	_derivationally_related_form	05044822	0
00797878	_derivationally_related_form	02373336	1
01024392	_verb_group	03965907	0
01907258	_also_see	00897564	1
08046759	_instance_hypernym	01918803	0
07007945	_derivationally_related_form	01716882	1
00307631	_instance_hypernym	00307631	0
10544748	_hypernym	10008716	1
07621618	_instance_hypernym	04194289	0
10014939	_hypernym	09770949	1
07237758	_also_see	00752298	0
01896031	_derivationally_related_form	01392080	1
00300537	_synset_domain_topic_of	07237758	0
00796976	_verb_group	02237338	1
04858455	_synset_domain_topic_of	01877204	0
02079525	_derivationally_related_form	04493505	1
02972533	_member_meronym	00799798	0
02669885	_hypernym	03297735	1
02702120	_member_meronym	02686625	0
07881800	_hypernym	00021265	1
07538395	_also_see	00164579	0
03626115	_derivationally_related_form	01531265	1
02270165	_synset_domain_topic_of	00590148	0
01986367	_derivationally_related_form	07361416	1
04162998	_member_meronym	07351612	0
00218045	_derivationally_related_form	01661804	1
10426454	_synset_domain_topic_of	00754956	0
01039330	_derivationally_related_form	06791372	1
02686625	_member_meronym	02672859	0
00643197	_derivationally_related_form	00704305	1
01298283	_hypernym	04951373	0
10435988	_derivationally_related_form	02048891	1
07193184	_has_part	14597413	0
00545501	_derivationally_related_form	01704236	1
08543081	_also_see	02451912	0
02313250	_derivationally_related_form	01150200	1
01671039	_has_part	00863433	0
02466670	_derivationally_related_form	08163273	1
00365709	_has_part	03151077	0
06387980	_has_part	06397903	1
03965907	_member_meronym	01763813	0
01778568	_derivationally_related_form	02011810	1
08511241	_hypernym	01169067	0
01672014	_derivationally_related_form	03624966	1
00251013	_synset_domain_topic_of	01037498	0
01929254	_derivationally_related_form	15280497	1
00167824	_synset_domain_topic_of	01400044	0
03424630	_hypernym	03579982	1
08284481	_verb_group	00286605	0
03461385	_derivationally_related_form	02326198	1
14374432	_member_meronym	01876530	0
02748927	_derivationally_related_form	04683814	1
00712419	_also_see	04564698	0
04802629	_derivationally_related_form	00617748	1
00752298	_similar_to	02688443	0
11473138	_hypernym	11480698	1
08121867	_instance_hypernym	02473431	0
02575723	_derivationally_related_form	00752954	1
02333979	_derivationally_related_form	03142679	0
02103162	_verb_group	01448100	1
04753455	_derivationally_related_form	13298011	0
00216174	_derivationally_related_form	02402825	1
02459173	_hypernym	07412092	0
03246454	_derivationally_related_form	01985923	1
00730499	_hypernym	03330947	0
02443049	_derivationally_related_form	10388732	1
01235258	_has_part	00036362	0
07420770	_derivationally_related_form	00258857	1
02559180	_derivationally_related_form	13935227	0
05765901	_derivationally_related_form	02723733	1
02396205	_member_meronym	03330947	0
07163988	_derivationally_related_form	00930806	1
01400044	_verb_group	00499642	0
01930117	_derivationally_related_form	03789946	1
00085678	_also_see	08877208	0
04463679	_hypernym	02788689	1
02702120	_similar_to	01454246	0
01664172	_verb_group	01755504	1
04951373	_member_meronym	00199659	0
02088627	_derivationally_related_form	07380144	1
01150559	_also_see	10345100	0
02141973	_derivationally_related_form	04789274	1
07621618	_similar_to	00754942	0
07231294	_derivationally_related_form	00868591	1
01517515	_verb_group	00456596	0
02357228	_hypernym	02267060	1
00968211	_verb_group	00867231	0
00657550	_derivationally_related_form	00874977	1
09909760	_also_see	10690421	0
01437888	_derivationally_related_form	08463063	1
07356676	_member_meronym	05726596	0
01323958	_derivationally_related_form	10231087	1
01985029	_has_part	13466586	0
13860548	_hypernym	13854649	1
00438178	_synset_domain_topic_of	15286249	0
03322099	_derivationally_related_form	02420232	1
01252280	_verb_group	07181546	0
01480149	_verb_group	01480469	1
00329227	_member_meronym	14597158	0
02091165	_derivationally_related_form	00285889	1
03337140	_member_meronym	00341548	0
10700517	_hypernym	10523519	1
07678193	_has_part	09810364	0
06399995	_derivationally_related_form	02469443	1
02459173	_hypernym	02773037	0
03002351	_derivationally_related_form	06135915	1
02409412	_also_see	02466496	0
01100145	_derivationally_related_form	10782940	1
14012667	_derivationally_related_form	03056010	0
01350971	_derivationally_related_form	07351031	1
00024814	_has_part	00024814	0
01489722	_derivationally_related_form	14425974	1
13754293	_instance_hypernym	00084371	0
02501738	_derivationally_related_form	00206927	1
10140783	_synset_domain_topic_of	09790278	0
00730301	_derivationally_related_form	08592656	1
03216562	_has_part	14974264	0
00952841	_derivationally_related_form	07135734	1
05044822	_derivationally_related_form	09790278	0
08279298	_derivationally_related_form	09759069	1
06613686	_hypernym	02593001	0
00663160	_synset_domain_topic_of	07073447	1
07351909	_derivationally_related_form	01197338	0
08463647	_hypernym	08463063	1
14560360	_has_part	02629256	0
01251928	_derivationally_related_form	04694441	1
00509958	_has_part	02333979	0
05103946	_derivationally_related_form	01382086	1
00248063	_similar_to	13529616	0
00331655	_derivationally_related_form	01893988	1
01907258	_synset_domain_topic_of	02347220	0
02958017	_derivationally_related_form	08860123	1
10506762	_hypernym	00232386	0
00317700	_hypernym	00153263	1
02377938	_also_see	10397001	0
05924920	_hypernym	05923696	1
09213828	_also_see	04689198	0
00101191	_derivationally_related_form	01726172	1
13255145	_member_meronym	08553535	0
00697062	_derivationally_related_form	09822955	1
01405044	_member_meronym	00313647	0
00735936	_hypernym	00732746	1
10168012	_verb_group	14514039	0
10018021	_derivationally_related_form	00807461	1
00616083	_hypernym	01789270	0
02058994	_derivationally_related_form	15282696	1
13315077	_derivationally_related_form	05706954	0
02291708	_hypernym	02289295	1
14984973	_hypernym	14425103	0
03119510	_hypernym	03736970	1
01313411	_hypernym	14984973	0
01160729	_derivationally_related_form	01416193	1
00667942	_hypernym	03130073	0
01687569	_derivationally_related_form	07066659	1
02702120	_hypernym	01163847	0
08523483	_derivationally_related_form	00329831	1
06950209	_hypernym	01180975	0
00695523	_also_see	02451951	1
01122601	_also_see	00667942	0
09941964	_hypernym	10317007	1
02409412	_member_meronym	05833252	0
01169704	_verb_group	01186428	1
10451590	_similar_to	02148109	0
09938672	_derivationally_related_form	14984973	1
08276342	_member_meronym	02886599	0
02706816	_hypernym	01116585	1
02347220	_similar_to	02353537	0
00439343	_derivationally_related_form	00330160	1
02043501	_instance_hypernym	05042871	0
03802973	_hypernym	02676261	1
09886010	_instance_hypernym	02963821	0
09962789	_derivationally_related_form	02077656	1
09483738	_hypernym	07073208	0
11197099	_instance_hypernym	10423225	1
00716531	_has_part	07172756	0
01539633	_derivationally_related_form	14598079	1
04465933	_derivationally_related_form	03142679	0
14513259	_hypernym	13934596	1
06663940	_instance_hypernym	05657718	0
06787037	_hypernym	06786629	1
01904293	_derivationally_related_form	01400044	0
02159427	_derivationally_related_form	10562749	1
07237758	_has_part	01400044	0
01173826	_derivationally_related_form	01082153	1
09624980	_derivationally_related_form	01037498	0
07503430	_derivationally_related_form	01774426	1
05245775	_has_part	01844859	0
00235368	_derivationally_related_form	15224293	1
00844298	_member_meronym	10216403	0
04930307	_derivationally_related_form	00300537	1
00330160	_similar_to	00208497	0
03708036	_derivationally_related_form	00998399	1
01876530	_verb_group	01976841	0
01846658	_hypernym	01846916	1
02839200	_instance_hypernym	00797430	0
02945161	_derivationally_related_form	02653996	1
07356676	_derivationally_related_form	03337140	0
00717208	_derivationally_related_form	01363482	1
00663160	_instance_hypernym	00392950	0
00471196	_derivationally_related_form	07334490	1
00799798	_also_see	02972533	0
00219012	_derivationally_related_form	14890659	1
00206927	_member_meronym	00350889	0
14417146	_derivationally_related_form	00483801	1
10712835	_similar_to	07236077	0
02240881	_derivationally_related_form	10575787	1
04564698	_similar_to	00429048	0
00483466	_derivationally_related_form	13898315	1
01168468	_instance_hypernym	06610436	0
01452255	_derivationally_related_form	10162507	1
00199659	_has_part	03777126	0
03065685	_derivationally_related_form	14854262	1
01134861	_derivationally_related_form	13926932	0
10087736	_hypernym	10266848	1
00936620	_derivationally_related_form	00208497	0
01918183	_derivationally_related_form	00284101	1
10115082	_derivationally_related_form	00622068	0
00066901	_derivationally_related_form	02523521	1
00514396	_has_part	02261888	0
10140783	_derivationally_related_form	00658052	1
05044528	_derivationally_related_form	13325382	0
08366202	_derivationally_related_form	00298041	1
09619168	_synset_domain_topic_of	06778102	0
03519981	_hypernym	04096066	1
07370125	_similar_to	01985029	0
00105778	_derivationally_related_form	09930876	1
00161739	_also_see	01292727	0
08062623	_derivationally_related_form	01745722	1
00566135	_instance_hypernym	00844298	0
00052672	_derivationally_related_form	04935528	1
00073584	_hypernym	07313814	0
07191777	_derivationally_related_form	00777931	1
05797597	_member_meronym	08618379	0
09927089	_derivationally_related_form	01533442	1
08618379	_also_see	01679433	0
03532672	_hypernym	03736970	1
07351612	_member_meronym	13344804	0
00044353	_derivationally_related_form	14481929	1
01169317	_similar_to	00036362	0
08647616	_synset_domain_topic_of	02691156	1
07182485	_hypernym	00566135	0
00263044	_derivationally_related_form	14463826	1
08322981	_synset_domain_topic_of	00749991	0
02742468	_derivationally_related_form	01859586	1
01517515	_has_part	02536329	0
02577586	_hypernym	02575082	1
01671039	_instance_hypernym	01566185	0
01765908	_derivationally_related_form	05832264	1
05245775	_also_see	00024814	0
00876665	_derivationally_related_form	09953965	1
01612295	_similar_to	09826074	0
05244934	_hypernym	04682462	1
01612295	_synset_domain_topic_of	07538395	0
15237567	_derivationally_related_form	02677332	1
02059916	_also_see	04087126	0
00216174	_derivationally_related_form	02422026	1
01201856	_instance_hypernym	00566135	0
02958126	_derivationally_related_form	06950528	1
01149470	_also_see	10754281	0
02924116	_derivationally_related_form	01950128	1
00514396	_has_part	10152083	0
07458453	_derivationally_related_form	01086103	1
02466496	_synset_domain_topic_of	02193765	0
09965134	_derivationally_related_form	01038538	1
04939324	_verb_group	01024392	0
00928077	_derivationally_related_form	00709625	1
03965907	_verb_group	10397001	0
00850501	_derivationally_related_form	07123870	1
13255145	_hypernym	08046759	0
07460104	_hypernym	07458453	1
01426077	_has_part	00263044	0
01149480	_derivationally_related_form	00235368	1
02559180	_hypernym	08617963	0
08274923	_derivationally_related_form	02599939	1
10753182	_verb_group	02784218	0
01912709	_hypernym	01912159	1
02702830	_member_meronym	01313411	0
00384620	_derivationally_related_form	00258854	1
05044528	_has_part	13809920	0
05704266	_derivationally_related_form	00601043	1
01566185	_derivationally_related_form	03872495	0
05923696	_derivationally_related_form	00624967	1
10451590	_member_meronym	06796119	0
02913152	_has_part	03579538	1
14360459	_has_part	02465939	0
00471711	_derivationally_related_form	00395333	1
03274561	_member_meronym	01415162	0
00512843	_hypernym	00511817	1
03872495	_has_part	10789118	0
00774344	_derivationally_related_form	07150138	1
13926932	_hypernym	08559155	0
00092293	_derivationally_related_form	14561618	1
07795598	_synset_domain_topic_of	02015598	0
14543552	_derivationally_related_form	02697120	1
05160796	_similar_to	02333979	0
00788184	_derivationally_related_form	07193958	1
06518068	_similar_to	07172756	0
04842515	_derivationally_related_form	01793177	1
02353537	_similar_to	01266491	0
00634586	_hypernym	00633864	1
07621618	_derivationally_related_form	15169873	0
00064479	_derivationally_related_form	05155821	1
01197338	_instance_hypernym	01204191	0
02175578	_derivationally_related_form	04555897	1
02281485	_synset_domain_topic_of	00799798	0
13482330	_derivationally_related_form	02743727	1
00747757	_derivationally_related_form	09782167	0
09845999	_derivationally_related_form	04683814	1
02459173	_derivationally_related_form	07313814	0
00380159	_derivationally_related_form	07444668	1
00590148	_member_meronym	00629257	0
14561618	_derivationally_related_form	00208497	1
08633957	_derivationally_related_form	00629257	0
08683548	_hypernym	08574314	1
01048912	_also_see	07307477	0
01227137	_derivationally_related_form	04873550	1
04019101	_instance_hypernym	14374432	0
00180837	_derivationally_related_form	00251013	1
04713692	_derivationally_related_form	05017458	0
01587077	_derivationally_related_form	04780755	1
06796119	_member_meronym	06516595	0
10565302	_derivationally_related_form	00697062	1
02353537	_derivationally_related_form	01809655	0
08337324	_hypernym	08077292	1
03654826	_verb_group	04753455	0
04188368	_hypernym	03670849	1
07071483	_synset_domain_topic_of	06055946	0
02098458	_verb_group	01505254	1
00730499	_hypernym	00129089	0
09811852	_derivationally_related_form	02950256	1
00593108	_synset_domain_topic_of	07459642	0
01137138	_verb_group	01134781	1
09824135	_instance_hypernym	03872495	0
04216963	_has_part	03309465	1
01229071	_member_meronym	02686568	0
05683582	_hypernym	05669934	1
06610436	_similar_to	00085678	0
01654271	_derivationally_related_form	10201535	1
10004804	_instance_hypernym	14574846	0
02482425	_derivationally_related_form	00222248	1
00183505	_derivationally_related_form	07237758	0
10641551	_derivationally_related_form	00796976	1
00888796	_similar_to	01809655	0
14429608	_derivationally_related_form	00658052	1
00350380	_instance_hypernym	07943480	0
01209135	_verb_group	01123887	1
01149470	_instance_hypernym	01859586	0
00208497	_derivationally_related_form	14561618	1
13508651	_similar_to	07518261	0
01533442	_verb_group	01532434	1
05726596	_has_part	03521076	0
01244410	_also_see	02510879	1
00251013	_instance_hypernym	06556692	0
01233027	_hypernym	01410223	1
00782072	_has_part	02672859	0
00259177	_hypernym	00258854	1
10345100	_derivationally_related_form	08121867	0
02188699	_has_part	02152212	1
14012667	_verb_group	00101191	0
00335988	_derivationally_related_form	00009631	1
09048460	_member_meronym	01264283	0
02237338	_derivationally_related_form	06634239	1
01679433	_instance_hypernym	06055946	0
10506762	_hypernym	10622053	1
01215694	_derivationally_related_form	10491309	0
01161635	_derivationally_related_form	07335243	1
09302616	_member_meronym	13344804	0
00335653	_derivationally_related_form	00386715	1
06791372	_similar_to	00392950	0
01219993	_derivationally_related_form	01266945	1
03337140	_also_see	14560360	0
00215683	_derivationally_related_form	02402409	1
14292090	_hypernym	00375071	0
10338707	_derivationally_related_form	01327301	1
02886599	_instance_hypernym	00754942	0
02196690	_derivationally_related_form	14607521	1
02396205	_member_meronym	07148192	0
00786458	_derivationally_related_form	10703692	1
10004804	_has_part	04096066	0
02250625	_derivationally_related_form	13282550	1
03327841	_also_see	00307631	0
10020890	_hypernym	10305802	1
01426077	_member_meronym	00350889	0
02126382	_derivationally_related_form	03916031	1
03661340	_member_meronym	01436518	0
02480923	_hypernym	00795863	1
04951373	_member_meronym	02409412	0
01020936	_hypernym	01019524	1
01612295	_synset_domain_topic_of	09824135	0
07333649	_hypernym	07355491	1
13466586	_derivationally_related_form	00748515	0
00264529	_derivationally_related_form	00220869	1
01451842	_has_part	04465933	0
00072012	_derivationally_related_form	13533886	1
06796119	_synset_domain_topic_of	09619168	0
01405044	_hypernym	01511706	1
10469346	_also_see	09953965	0
01037650	_derivationally_related_form	06610332	1
03457686	_similar_to	01877204	0
01073822	_derivationally_related_form	07813107	1
00300537	_synset_domain_topic_of	06950209	0
04105438	_hypernym	04014297	1
11499817	_has_part	02066939	0
06210363	_derivationally_related_form	02611373	1
14574846	_hypernym	15010703	0
00368847	_derivationally_related_form	00612114	1
06518068	_synset_domain_topic_of	04874672	0
04490091	_has_part	04294614	1
00904878	_member_meronym	02059916	0
05636048	_hypernym	05638987	1
08890097	_derivationally_related_form	00799798	0
04226322	_hypernym	02887209	1
14687513	_derivationally_related_form	07338114	0
02043982	_derivationally_related_form	08612049	1
02155248	_has_part	01689379	0
10044879	_derivationally_related_form	00592102	1
01721556	_similar_to	13298011	0
15145586	_derivationally_related_form	09827683	1
14313154	_similar_to	00300537	0
00406243	_derivationally_related_form	14031108	1
00514396	_synset_domain_topic_of	04322026	0
13855627	_derivationally_related_form	02666882	1
00784388	_also_see	01668421	0
00999787	_derivationally_related_form	00922867	1
07181546	_instance_hypernym	08278169	0
02033805	_hypernym	01907258	1
04472726	_synset_domain_topic_of	03061674	0
00962634	_similar_to	00963283	1
00161987	_instance_hypernym	14360459	0
00814850	_derivationally_related_form	10510546	1
08549733	_member_meronym	10426454	0
10037385	_derivationally_related_form	01190494	1
02763740	_derivationally_related_form	00492677	0
07410207	_hypernym	07338681	1
01451842	_similar_to	13451508	0
01675963	_verb_group	02749247	1
03337140	_also_see	13255145	0
10491309	_hypernym	10480253	1
03109693	_member_meronym	03656484	0
10451590	_hypernym	10207831	1
04322026	_derivationally_related_form	02355596	0
05068080	_derivationally_related_form	02038791	1
02384275	_hypernym	01876530	0
10712835	_derivationally_related_form	06651577	1
01782218	_also_see	07561590	0
01158690	_derivationally_related_form	00467717	1
13282550	_hypernym	00021766	0
08879197	_instance_hypernym	08524735	1
01266491	_synset_domain_topic_of	02702120	0
01253665	_hypernym	00231887	1
05245192	_hypernym	14451911	0
01955984	_verb_group	02742232	1
00313647	_verb_group	00952841	0
00877345	_derivationally_related_form	00645939	1
00164579	_similar_to	00248063	0
02761834	_has_part	03537412	1
06722186	_derivationally_related_form	02377938	0
00257770	_hypernym	00255214	1
01197338	_has_part	04087126	0
00884011	_derivationally_related_form	10482054	1
03424862	_member_meronym	01179865	0
11527967	_derivationally_related_form	01904293	1
00593108	_instance_hypernym	01292727	0
01325536	_verb_group	01323958	1
00566135	_instance_hypernym	10502046	0
00240938	_derivationally_related_form	02384041	1
02686625	_member_meronym	02520147	0
04620558	_derivationally_related_form	01229631	1
10004804	_similar_to	02422026	0
07889510	_hypernym	07886849	1
14586258	_instance_hypernym	05967773	0
14489113	_derivationally_related_form	00432839	1
00863433	_also_see	00248063	0
00113818	_derivationally_related_form	00758972	1
02409412	_has_part	00386715	0
01125693	_derivationally_related_form	02466670	1
00797430	_hypernym	01524359	0
03427296	_has_part	03521076	1
08324514	_derivationally_related_form	00590148	0
13556509	_hypernym	13464204	1
07356676	_verb_group	15228267	0
02667228	_hypernym	02666882	1
13315077	_also_see	04435870	0
01537409	_derivationally_related_form	00072261	1
04008385	_has_part	07181546	0
02141973	_derivationally_related_form	06890846	1
00844298	_verb_group	03457686	0
01168468	_derivationally_related_form	00838367	1
01456771	_also_see	05527216	0
14110411	_derivationally_related_form	00443384	1
10789118	_derivationally_related_form	02686568	0
05798569	_hypernym	05924920	1
07371293	_derivationally_related_form	01789386	0
00869596	_derivationally_related_form	09612291	1
01204191	_also_see	01763813	0
13934900	_derivationally_related_form	02673134	1
06791372	_verb_group	04689198	0
01398941	_hypernym	01398212	1
01037498	_synset_domain_topic_of	08381820	0
05068461	_derivationally_related_form	02037090	1
02702830	_hypernym	01313411	0
00968211	_derivationally_related_form	05088324	1
01201856	_instance_hypernym	00328128	0
01136614	_derivationally_related_form	02746365	1
01033527	_has_part	10782791	0
02464342	_hypernym	02463704	1
10004804	_instance_hypernym	00754956	0
02077656	_also_see	01973125	1
01693727	_hypernym	10426454	0
02632353	_derivationally_related_form	14449405	1
08615374	_member_meronym	00036362	0
09994119	_hypernym	09993901	1
13793776	_member_meronym	08284481	0
11466043	_derivationally_related_form	00372665	1
14597158	_derivationally_related_form	03351262	0
00793271	_derivationally_related_form	01157850	1
02122580	_member_meronym	07943480	0
10036266	_derivationally_related_form	01165043	1
02422026	_also_see	02059916	0
02068413	_derivationally_related_form	07436100	1
02378183	_also_see	09960688	0
04490091	_derivationally_related_form	01954341	1
01789270	_instance_hypernym	00074038	0
02586619	_derivationally_related_form	10541229	1
01904293	_similar_to	00730499	0
07884567	_hypernym	07881800	1
14687513	_verb_group	10004804	0
07365849	_derivationally_related_form	01859586	1
10451590	_also_see	15295416	0
05696020	_derivationally_related_form	00456740	1
02384275	_verb_group	00820801	0
01846320	_derivationally_related_form	00312784	1
06556692	_synset_domain_topic_of	03808564	0
01859586	_hypernym	01859221	1
00312784	_has_part	00311338	0
00407633	_derivationally_related_form	03793186	1
00776059	_member_meronym	04194289	0
07375635	_derivationally_related_form	02014553	1
10207831	_verb_group	01101391	0
07142566	_hypernym	07140659	1
08890097	_instance_hypernym	00385501	0
05196582	_derivationally_related_form	02539334	1
08167779	_similar_to	02409412	0
01912159	_derivationally_related_form	00296946	1
04087126	_synset_domain_topic_of	07181546	0
01726172	_verb_group	01725051	1
04472726	_has_part	02784218	0
00434374	_verb_group	00358431	1
15163797	_instance_hypernym	13282550	0
02052675	_hypernym	02052476	1
01024392	_also_see	14687513	0
06376154	_hypernym	07092158	1
14451911	_has_part	13345286	0
07123870	_derivationally_related_form	01053771	1
00350889	_synset_domain_topic_of	10314952	0
02700867	_verb_group	02701210	1
04689198	_also_see	09953965	0
01201429	_derivationally_related_form	02431320	1
10168012	_synset_domain_topic_of	00479076	0
03525454	_derivationally_related_form	01217043	1
06722186	_has_part	00889229	0
03233905	_derivationally_related_form	01995211	1
00749991	_synset_domain_topic_of	00232386	0
07196682	_hypernym	06285090	1
01470225	_verb_group	05123760	0
01674717	_derivationally_related_form	03965907	1
01135529	_also_see	04100174	0
00152018	_derivationally_related_form	01026095	1
06535222	_synset_domain_topic_of	02641463	0
07220773	_has_part	06396930	1
13372123	_verb_group	15255804	0
06490887	_hypernym	06481320	1
00206927	_verb_group	02051270	0
00978549	_derivationally_related_form	07128692	1
04660261	_hypernym	07356676	0
00297062	_hypernym	00295701	1
01859586	_instance_hypernym	05044528	0
07475364	_derivationally_related_form	02473688	1
10152083	_hypernym	00854393	0
13650045	_has_part	13649791	1
00730499	_member_meronym	08167779	0
07472929	_derivationally_related_form	01094086	1
01215694	_synset_domain_topic_of	04497005	0
00601783	_derivationally_related_form	07183151	1
01186428	_synset_domain_topic_of	04530566	0
01606205	_hypernym	01587062	1
04194289	_hypernym	09810364	0
10597234	_derivationally_related_form	02409941	1
04087126	_hypernym	01859586	0
05651971	_derivationally_related_form	00272391	1
02120458	_also_see	00505802	0
01227137	_also_see	01222884	1
05042871	_hypernym	04194289	0
01244410	_also_see	01460421	1
01134861	_verb_group	01105186	0
01877355	_hypernym	01876530	1
02120458	_derivationally_related_form	00403401	0
00973056	_derivationally_related_form	04472726	1
06518068	_has_part	04530566	0
01049685	_derivationally_related_form	02148369	1
08548733	_verb_group	03907654	0
11498040	_derivationally_related_form	01505254	1
01215694	_has_part	00164579	0
01169067	_hypernym	01168468	1
14012667	_member_meronym	00988287	0
04412901	_hypernym	04306080	1
04939324	_also_see	04939324	0
02653996	_derivationally_related_form	04411264	1
00919424	_hypernym	06876144	0
01935476	_derivationally_related_form	02834778	1
04337740	_member_meronym	05123760	0
08513163	_hypernym	08552138	1
00843128	_similar_to	02773037	0
10527334	_derivationally_related_form	00963283	1
01105186	_verb_group	13529616	0
00403401	_derivationally_related_form	11495041	1
01844859	_also_see	10782791	0
02133435	_derivationally_related_form	04674715	1
07884567	_verb_group	10140783	0
10287213	_derivationally_related_form	01475831	1
07172756	_derivationally_related_form	04874672	0
06595351	_has_part	06258228	1
05554405	_synset_domain_topic_of	07371293	0
04304375	_hypernym	03273061	1
02193765	_derivationally_related_form	15255804	0
10221312	_derivationally_related_form	00853633	1
00074038	_member_meronym	07295629	0
01448100	_also_see	01592456	1
13459322	_has_part	06663940	0
13754293	_derivationally_related_form	00153263	1
00930599	_similar_to	01298283	0
08617963	_derivationally_related_form	02693168	1
02886599	_has_part	07621618	0
02691156	_has_part	03295928	1
02453321	_verb_group	00889229	0
02194495	_hypernym	02194286	1
01566185	_similar_to	00514871	0
02727039	_derivationally_related_form	05125377	1
00792471	_verb_group	09048460	0
13575433	_derivationally_related_form	03000447	1
03773035	_has_part	02340360	0
01155687	_derivationally_related_form	00506658	1
02861617	_hypernym	00074038	0
00869126	_derivationally_related_form	07183151	1
09824135	_instance_hypernym	10491309	0
02742232	_derivationally_related_form	03244388	1
10753182	_has_part	00456596	0
06843520	_derivationally_related_form	01589363	1
03042697	_derivationally_related_form	00263044	0
00276813	_derivationally_related_form	01531998	1
00854393	_member_meronym	04951373	0
05716744	_hypernym	05715283	1
02514187	_synset_domain_topic_of	07169353	0
00050037	_derivationally_related_form	02471327	1
01844859	_similar_to	00867357	0
15282696	_derivationally_related_form	02058994	1
02148109	_hypernym	00867357	0
07561112	_hypernym	07560652	1
00874621	_synset_domain_topic_of	00233386	0
02818832	_derivationally_related_form	02337066	1
00792471	_has_part	13298011	0
10467395	_derivationally_related_form	02984104	1
00599472	_similar_to	01487008	0
06811625	_derivationally_related_form	00931852	1
00930806	_member_meronym	00191980	0
02593354	_derivationally_related_form	10478960	1
04874672	_derivationally_related_form	00199659	0
01036804	_derivationally_related_form	07137129	1
00884778	_has_part	02453321	0
06730780	_derivationally_related_form	00843468	1
00824767	_hypernym	02992032	0
03949442	_derivationally_related_form	01163847	1
06876144	_derivationally_related_form	09213828	0
08647616	_synset_domain_topic_of	07006119	1
00854393	_derivationally_related_form	03350602	0
00814458	_verb_group	00865387	1
00375071	_member_meronym	02340360	0
04125853	_hypernym	02827606	1
00730499	_instance_hypernym	10610465	0
02517202	_derivationally_related_form	00732746	1
02261888	_verb_group	03238131	0
01456771	_derivationally_related_form	07351031	1
02958343	_also_see	01470225	0
01189604	_hypernym	01196037	1
13935227	_derivationally_related_form	13298011	0
08628921	_derivationally_related_form	02727039	1
07459642	_instance_hypernym	07412092	0
05960464	_hypernym	05943300	1
02368787	_also_see	07550369	0
04811126	_derivationally_related_form	02480923	1
00479076	_hypernym	14514039	0
13381734	_derivationally_related_form	02311260	1
01976841	_also_see	08167953	0
02532595	_derivationally_related_form	00639556	1
15163797	_verb_group	06610436	0
01163779	_hypernym	01161161	1
02702120	_instance_hypernym	00509958	0
02515080	_hypernym	02514187	1
10502046	_synset_domain_topic_of	00156601	0
01350699	_verb_group	01349130	1
02120458	_has_part	00776059	0
00330457	_derivationally_related_form	00439343	1
00350380	_derivationally_related_form	02514187	0
00796588	_derivationally_related_form	13935227	1
14010148	_also_see	02465939	0
00567044	_derivationally_related_form	01512259	1
01524359	_instance_hypernym	02839200	0
00371846	_derivationally_related_form	01329026	1
10502046	_member_meronym	15255804	0
02190188	_verb_group	00461493	1
07169353	_derivationally_related_form	00341548	0
01582645	_derivationally_related_form	00938419	1
00514871	_hypernym	00514871	0
02272549	_derivationally_related_form	00088481	1
10402086	_synset_domain_topic_of	06796119	0
01233027	_derivationally_related_form	00125436	1
10419630	_synset_domain_topic_of	01976841	0
06876309	_hypernym	06873252	1
02463141	_has_part	07351612	0
06216160	_derivationally_related_form	09957156	1
00386715	_has_part	02466496	0
03422589	_hypernym	04494204	1
15163797	_verb_group	07182485	0
00291873	_derivationally_related_form	05018103	1
00263044	_hypernym	02593001	0
01180351	_verb_group	01181295	1
04753455	_instance_hypernym	09302616	0
00199912	_hypernym	00199659	1
00171586	_also_see	14574846	0
00205349	_derivationally_related_form	00796976	1
03808564	_derivationally_related_form	13508651	0
02748927	_derivationally_related_form	05003590	1
00459114	_synset_domain_topic_of	00809654	0
09975425	_derivationally_related_form	05638063	1
11499817	_similar_to	06669384	0
01564144	_derivationally_related_form	00217773	1
01876530	_instance_hypernym	07073208	0
05718254	_derivationally_related_form	02135048	1
15286249	_derivationally_related_form	08553535	0
02165543	_hypernym	02131279	1
13255145	_member_meronym	09213828	0
03282933	_hypernym	03816849	1
07350192	_synset_domain_topic_of	01856626	0
00150287	_derivationally_related_form	13427078	1
10397001	_similar_to	00874621	0
02471690	_derivationally_related_form	06507041	1
10168012	_similar_to	08553535	0
02568065	_derivationally_related_form	00746587	1
00956250	_similar_to	15163797	0
01144876	_hypernym	01133281	1
04980656	_hypernym	07236077	0
01453433	_derivationally_related_form	00114871	1
01904293	_instance_hypernym	07518261	0
02700455	_verb_group	02659763	1
01809655	_member_meronym	01135529	0
02995998	_derivationally_related_form	01458973	1
15236338	_similar_to	15171008	0
00754424	_derivationally_related_form	02574516	1
01591158	_verb_group	01566185	0
13421832	_derivationally_related_form	00724029	1
07182485	_also_see	10502046	0
05513807	_has_part	05524615	1
05826291	_member_meronym	01235463	0
03777283	_derivationally_related_form	01743784	1
10548681	_member_meronym	01168468	0
11466043	_derivationally_related_form	02333358	1
00129089	_has_part	02593001	0
07813107	_hypernym	07809368	1
02702830	_has_part	00183505	0
02817650	_derivationally_related_form	01418179	1
13754293	_member_meronym	04441528	0
00891936	_derivationally_related_form	06686174	1
00700652	_instance_hypernym	01688256	0
14416845	_hypernym	14373582	1
02465939	_hypernym	13423922	0
07290278	_hypernym	07289956	1
07356676	_derivationally_related_form	04435870	0
02992070	_derivationally_related_form	14513259	1
03521076	_derivationally_related_form	13342987	0
02689299	_derivationally_related_form	00367976	1
00988287	_has_part	02466496	0
00995119	_derivationally_related_form	05160796	1
02686625	_also_see	05017458	0
03793186	_derivationally_related_form	00407633	1
04821451	_derivationally_related_form	01743784	0
01194418	_derivationally_related_form	10186774	1
00227165	_verb_group	01689379	0
02459633	_derivationally_related_form	03259505	1
01540693	_has_part	07621618	0
01387301	_derivationally_related_form	03965907	1
15255804	_has_part	01841079	0
01704236	_derivationally_related_form	00545501	1
00233386	_hypernym	03965907	0
01105186	_derivationally_related_form	07120524	1
04096066	_synset_domain_topic_of	01197338	0
00998399	_derivationally_related_form	00910203	1
01150559	_derivationally_related_form	07295629	0
07512465	_derivationally_related_form	02105990	1
00084371	_verb_group	02020590	0
04468005	_member_meronym	02959942	1
01436518	_also_see	04111190	0
14704966	_derivationally_related_form	01332205	1
02392600	_similar_to	00797430	0
02397460	_derivationally_related_form	15291498	1
05017458	_verb_group	13809920	0
01026095	_derivationally_related_form	06885083	1
09782167	_instance_hypernym	09483738	0
02741357	_hypernym	02741149	1
01101391	_has_part	02773037	0
01327301	_derivationally_related_form	00223720	1
05527216	_verb_group	06669384	0
05079638	_hypernym	05074774	1
13935227	_verb_group	00514871	0
00146572	_derivationally_related_form	00612114	1
02124332	_verb_group	00863513	0
02593354	_derivationally_related_form	01135795	1
00930599	_member_meronym	02193194	0
08893223	_instance_hypernym	09203827	1
04657876	_derivationally_related_form	01679433	0
02027411	_derivationally_related_form	07959943	1
09873604	_member_meronym	13935227	0
10206173	_derivationally_related_form	00819508	1
01877204	_also_see	07795598	0
00437125	_derivationally_related_form	00195569	1
00084371	_hypernym	08324514	0
00401783	_derivationally_related_form	00024814	1
01693727	_has_part	02963821	0
00336539	_derivationally_related_form	09243769	1
05700087	_similar_to	05826291	0
01250335	_derivationally_related_form	02482425	1
01169067	_hypernym	00843128	0
07622061	_has_part	07622261	1
15255804	_instance_hypernym	00870453	0
00953923	_hypernym	00953216	1
09782167	_also_see	00438178	0
01112584	_verb_group	00669970	1
00782072	_also_see	04435870	0
02693319	_hypernym	02690708	1
00183505	_derivationally_related_form	00311113	0
00978549	_derivationally_related_form	07131854	1
01348174	_derivationally_related_form	07795598	0
01224744	_derivationally_related_form	10378412	1
10152083	_has_part	15163797	0
15129927	_derivationally_related_form	00297906	1
04100174	_derivationally_related_form	02559180	0
04561734	_hypernym	03309808	1
04811126	_hypernym	01079873	0
09625401	_derivationally_related_form	02496816	1
08167953	_verb_group	02212646	0
00858849	_derivationally_related_form	00016380	1
10151570	_derivationally_related_form	01235258	0
08877208	_instance_hypernym	08633957	1
09624980	_instance_hypernym	03907654	0
01223182	_hypernym	00140967	1
08873412	_synset_domain_topic_of	01180975	0
01845720	_derivationally_related_form	10771392	1
08046759	_verb_group	07550369	0
00217014	_derivationally_related_form	01619929	1
04753455	_hypernym	03881534	0
07410207	_derivationally_related_form	00335923	1
01985029	_synset_domain_topic_of	01763813	0
03051540	_derivationally_related_form	00047945	1
08553535	_member_meronym	02839200	0
02672859	_derivationally_related_form	13529616	1
04087126	_also_see	04087126	0
02274482	_derivationally_related_form	00085432	1
01105186	_instance_hypernym	13863771	0
04101701	_hypernym	04574999	1
08553535	_instance_hypernym	04592741	0
05513529	_hypernym	05509146	1
13752172	_instance_hypernym	15286249	0
01363482	_derivationally_related_form	03875218	1
00418615	_synset_domain_topic_of	02124332	0
00309115	_derivationally_related_form	01915365	1
01809655	_verb_group	04435870	0
09757944	_derivationally_related_form	01196037	1
01229071	_verb_group	01105186	0
01233347	_derivationally_related_form	04515129	1
01809655	_verb_group	00888796	0
01150467	_derivationally_related_form	00172732	1
01149470	_also_see	10554455	0
02742322	_hypernym	03051540	1
00206927	_similar_to	10084635	0
00203649	_hypernym	00203342	1
01229071	_also_see	01415162	0
14562324	_derivationally_related_form	01161635	1
02055649	_verb_group	10502046	0
02593001	_hypernym	02575082	1
08121867	_similar_to	04405540	0
10051975	_derivationally_related_form	00416135	1
00384802	_similar_to	00208497	0
10492202	_derivationally_related_form	01453433	1
03424862	_hypernym	01179865	0
00463246	_has_part	00556313	1
10491309	_derivationally_related_form	06663940	0
07433145	_derivationally_related_form	02047650	1
00663160	_similar_to	04592741	0
01946408	_derivationally_related_form	00351334	1
14445226	_instance_hypernym	02644234	0
02225911	_hypernym	02339413	1
01767163	_verb_group	07458453	0
06619065	_derivationally_related_form	02148788	1
04472726	_similar_to	03330947	0
10674130	_derivationally_related_form	02534492	1
05967773	_similar_to	00248063	0
06778102	_derivationally_related_form	00853958	1
07181546	_also_see	10388440	0
07254836	_derivationally_related_form	02227487	1
08167953	_has_part	04194289	0
02017937	_hypernym	02053941	1
02643574	_similar_to	08553535	0
00809654	_derivationally_related_form	10022759	1
01524359	_has_part	01470225	0
00123234	_derivationally_related_form	01134238	1
13373214	_also_see	02043501	0
07486229	_derivationally_related_form	01825237	1
14445226	_verb_group	01583494	0
02579447	_derivationally_related_form	10257647	1
05820170	_member_meronym	13342987	0
00535452	_derivationally_related_form	05070032	1
02473431	_instance_hypernym	04183329	0
02632567	_hypernym	02632353	1
08276342	_derivationally_related_form	02749247	0
10569744	_derivationally_related_form	00599472	1
13508651	_verb_group	07561590	0
14607521	_derivationally_related_form	02196690	1
10207831	_also_see	03351262	0
09960688	_derivationally_related_form	00888786	1
02051270	_synset_domain_topic_of	06518068	0
06677302	_hypernym	06359877	1
00036362	_synset_domain_topic_of	00579712	0
03665366	_derivationally_related_form	00291873	1
01583494	_hypernym	04154152	0
09847010	_derivationally_related_form	02317970	1
10607933	_similar_to	10256080	0
00395797	_derivationally_related_form	00449692	1
02672859	_instance_hypernym	00329227	0
08399586	_derivationally_related_form	02727039	1
00330160	_verb_group	01668421	0
10645854	_derivationally_related_form	01918803	1
04657876	_verb_group	03130073	0
00051761	_hypernym	00047945	1
07520612	_hypernym	10168012	0
02384275	_derivationally_related_form	07453195	1
03808564	_derivationally_related_form	13319726	0
04500060	_derivationally_related_form	02089420	1
07696527	_member_meronym	07459642	0
00782057	_derivationally_related_form	10623354	1
09213828	_instance_hypernym	01976841	0
06201136	_derivationally_related_form	10402086	1
01524359	_verb_group	00375071	0
08612049	_hypernym	08616311	1
06796119	_synset_domain_topic_of	07313814	0
08397255	_derivationally_related_form	01097031	1
10032342	_verb_group	07148192	0
01069980	_derivationally_related_form	01189604	1
00885925	_member_meronym	10168012	0
02384686	_derivationally_related_form	10150940	1
10548681	_synset_domain_topic_of	07458453	0
14578104	_derivationally_related_form	02751597	1
09873604	_also_see	00318735	0
00759657	_derivationally_related_form	07168131	1
01105186	_instance_hypernym	07943480	0
08057633	_derivationally_related_form	01449974	1
07338114	_instance_hypernym	06099269	0
01091427	_derivationally_related_form	09773245	1
00384802	_also_see	02011685	0
02836035	_has_part	04283378	1
02261888	_verb_group	00514396	0
01739814	_derivationally_related_form	10078806	1
01522052	_derivationally_related_form	00208497	0
04359335	_hypernym	03736970	1
03925226	_instance_hypernym	00716531	0
07183151	_hypernym	07181935	1
05713737	_derivationally_related_form	01292727	0
01070187	_derivationally_related_form	01189224	1
00820801	_verb_group	08615374	0
01083645	_derivationally_related_form	02228698	1
10554455	_hypernym	00454868	0
07891726	_hypernym	07884567	1
00300537	_instance_hypernym	03907654	0
00978173	_derivationally_related_form	06726158	1
01689379	_instance_hypernym	02992032	0
01843055	_derivationally_related_form	10596689	1
00776059	_has_part	00952841	0
07176243	_derivationally_related_form	02316649	1
00390842	_derivationally_related_form	00313806	0
00060201	_derivationally_related_form	02075049	1
00581812	_verb_group	02559180	0
07255174	_hypernym	07205573	1
09213828	_derivationally_related_form	03432129	0
01094086	_derivationally_related_form	09889691	1
01079873	_hypernym	04115456	0
13480541	_derivationally_related_form	00451838	1
04435870	_similar_to	00479076	0
02000868	_derivationally_related_form	10100124	1
08284481	_instance_hypernym	00581812	0
02406585	_derivationally_related_form	01010458	1
08878016	_hypernym	04689198	0
01580928	_derivationally_related_form	04493505	1
00754956	_verb_group	06696483	0
02517768	_member_meronym	02518488	1
00843128	_also_see	02829696	0
01469770	_derivationally_related_form	07186148	1
07073208	_instance_hypernym	00392950	0
02537407	_hypernym	02575082	1
01134861	_verb_group	13459322	0
10562283	_derivationally_related_form	01275762	1
08615374	_instance_hypernym	13390857	0
06767777	_derivationally_related_form	00853958	1
02396205	_synset_domain_topic_of	06950209	0
01486312	_derivationally_related_form	02974697	1
10548681	_verb_group	03457686	0
06508816	_derivationally_related_form	01001643	1
00616083	_member_meronym	07356676	0
01779165	_also_see	01785748	1
00298041	_has_part	03965907	0
02487573	_derivationally_related_form	09887850	1
15163797	_has_part	10032342	0
15266265	_hypernym	15291498	1
06516595	_also_see	01266491	0
01238640	_hypernym	01410223	1
14560360	_also_see	04263760	0
01350699	_hypernym	01223182	1
02020590	_hypernym	00230172	0
09790278	_hypernym	10488016	1
03808564	_has_part	02044866	0
07961480	_derivationally_related_form	01484714	1
00024814	_has_part	05554405	0
01101753	_derivationally_related_form	02454649	1
01976841	_hypernym	04405540	0
00271946	_derivationally_related_form	01159025	1
03330947	_also_see	00700652	0
01128655	_hypernym	01128390	1
15228267	_similar_to	07678193	0
00276068	_hypernym	00275843	1
03325769	_also_see	01204191	0
10203949	_hypernym	10307234	1
07169353	_has_part	01415162	0
02334867	_derivationally_related_form	02738031	1
01778568	_derivationally_related_form	02672859	0
02278830	_hypernym	02289295	1
06796119	_also_see	04465933	0
04574999	_derivationally_related_form	01935476	1
07350192	_derivationally_related_form	03274561	0
08524130	_hypernym	08523483	1
00889229	_member_meronym	10426454	0
01027508	_derivationally_related_form	06539770	1
02281485	_instance_hypernym	14451911	0
01886407	_also_see	02360448	1
01522052	_also_see	07356676	0
04994413	_hypernym	04992163	1
09810364	_member_meronym	08121867	0
04161981	_derivationally_related_form	02701962	1
02193194	_verb_group	01531998	0
06520944	_derivationally_related_form	00888786	1
10152083	_verb_group	00824767	0
01486312	_hypernym	01587062	1
00843128	_also_see	02702120	0
01963942	_derivationally_related_form	09869171	1
15010703	_verb_group	02124332	0
00205543	_derivationally_related_form	00614057	1
01496978	_hypernym	10754281	0
07487955	_hypernym	07484265	1
07148192	_synset_domain_topic_of	01517515	0
09448361	_has_part	09349648	1
07207273	_instance_hypernym	04019696	0
02741960	_derivationally_related_form	00251013	1
02773037	_instance_hypernym	02460619	0
00910203	_derivationally_related_form	00998399	1
00776059	_verb_group	05044822	0
01628302	_derivationally_related_form	01793177	1
04980656	_member_meronym	06791372	0
00470084	_derivationally_related_form	00231567	1
13390857	_hypernym	04435870	0
00954271	_derivationally_related_form	07221094	1
07377473	_synset_domain_topic_of	00390842	0
01158181	_derivationally_related_form	10479561	1
10426454	_verb_group	10469346	0
03427296	_has_part	03682487	1
13342987	_hypernym	04183329	0
00692907	_derivationally_related_form	01219075	1
06518068	_has_part	00870453	0
00867231	_derivationally_related_form	06791372	1
07246742	_instance_hypernym	04154152	0
01844859	_synset_domain_topic_of	00300441	1
14574846	_has_part	00884778	0
07679356	_derivationally_related_form	01337653	1
08167953	_derivationally_related_form	07356676	0
06220616	_derivationally_related_form	10618848	1
07338114	_derivationally_related_form	00233386	0
01849746	_derivationally_related_form	05046471	1
07575510	_member_meronym	13390857	0
00206927	_derivationally_related_form	02501738	1
07396658	_instance_hypernym	04605726	0
07255027	_derivationally_related_form	00804476	1
10610465	_verb_group	03056010	0
00646833	_hypernym	00634276	1
01977701	_derivationally_related_form	02784218	0
09354511	_hypernym	08523483	1
05123760	_instance_hypernym	07236077	0
02353844	_synset_domain_topic_of	00610738	1
01168468	_derivationally_related_form	02155248	0
00955987	_derivationally_related_form	01116585	1
01235258	_also_see	02465939	0
00368302	_derivationally_related_form	00270005	1
13372123	_member_meronym	00385501	0
02460619	_derivationally_related_form	06522501	1
02043501	_similar_to	08167953	0
08463647	_derivationally_related_form	01031256	1
04435870	_member_meronym	00843128	0
08552138	_derivationally_related_form	02812482	1
10183757	_has_part	02644234	0
06502378	_hypernym	06647206	1
07039478	_hypernym	02514187	0
02418205	_derivationally_related_form	09993901	1
14708720	_synset_domain_topic_of	10256080	0
14562142	_derivationally_related_form	00388635	1
13889843	_synset_domain_topic_of	00922144	0
00056188	_derivationally_related_form	13485408	1
00298041	_similar_to	00298041	0
05716577	_derivationally_related_form	02337667	1
07351612	_similar_to	00230172	0
04099969	_has_part	04098513	1
04405540	_has_part	00809654	0
03875218	_hypernym	03058107	1
13903387	_member_meronym	07338114	0
05812038	_derivationally_related_form	02676496	1
14574846	_has_part	05527216	0
01163779	_derivationally_related_form	10069427	1
04592741	_verb_group	07458453	0
08890097	_has_part	08891889	1
07371293	_hypernym	01451842	0
01097960	_derivationally_related_form	01156438	1
02011685	_synset_domain_topic_of	10140783	0
07305234	_derivationally_related_form	01797730	1
10152083	_hypernym	10032342	0
00095502	_derivationally_related_form	02421374	1
02124332	_has_part	08282696	0
00877327	_hypernym	00789138	1
10782791	_verb_group	00286605	0
04530566	_has_part	04554211	1
04188064	_also_see	05762149	0
00064479	_derivationally_related_form	05160796	1
05042871	_instance_hypernym	07193184	0
01485839	_derivationally_related_form	02774152	1
08278169	_derivationally_related_form	05826291	0
05750163	_derivationally_related_form	10155849	1
00101191	_also_see	02193765	0
05162455	_derivationally_related_form	00233335	1
02958343	_member_meronym	10168012	0
00263044	_derivationally_related_form	14464203	1
02193194	_member_meronym	03925226	0
01539633	_synset_domain_topic_of	06084469	1
05762149	_similar_to	00384802	0
03817647	_hypernym	04596852	1
09273291	_derivationally_related_form	04848262	0
00023383	_also_see	00632438	1
10491309	_verb_group	01264283	0
07365193	_hypernym	07365024	1
08453464	_synset_domain_topic_of	13935227	0
07184149	_derivationally_related_form	00774344	1
00514871	_synset_domain_topic_of	10789118	0
00320852	_derivationally_related_form	02502536	1
08549733	_hypernym	04087126	0
00597265	_hypernym	00596807	1
03337140	_has_part	08324514	0
10433164	_synset_domain_topic_of	02686568	1
15228267	_hypernym	01232412	0
01112584	_derivationally_related_form	00794367	1
00844298	_member_meronym	02055649	0
00828082	_derivationally_related_form	00048633	1
03519981	_also_see	00776059	0
02730471	_hypernym	02133435	1
00505802	_member_meronym	10419630	0
00956405	_derivationally_related_form	00373544	1
10743675	_verb_group	00312784	0
02764765	_derivationally_related_form	07411645	1
00101191	_synset_domain_topic_of	02015598	0
00514871	_derivationally_related_form	02446651	1
02763740	_derivationally_related_form	02261888	0
01920932	_derivationally_related_form	00288970	1
01451842	_has_part	00073584	0
00312932	_derivationally_related_form	01846320	1
07123870	_has_part	02643574	0
01803003	_derivationally_related_form	07519040	1
02829696	_verb_group	10402086	0
02462580	_derivationally_related_form	00182213	1
01456771	_has_part	10004804	0
00690501	_hypernym	00671351	1
00930806	_derivationally_related_form	02686568	0
03302938	_has_part	04218564	1
05700087	_hypernym	00327824	0
00138508	_derivationally_related_form	00346693	1
02015598	_similar_to	00566135	0
02149302	_derivationally_related_form	14574846	1
02520147	_hypernym	01819147	0
00901799	_derivationally_related_form	06397903	1
00227165	_member_meronym	00930599	0
00512749	_derivationally_related_form	02468864	1
08511241	_similar_to	00045646	0
00358431	_derivationally_related_form	13962498	1
01168468	_also_see	03056010	0
00989602	_derivationally_related_form	07071483	1
02851099	_also_see	08617963	0
02075049	_hypernym	02009433	1
02281485	_also_see	00085678	0
15152817	_derivationally_related_form	09605289	1
02091165	_verb_group	10610465	0
00536304	_similar_to	00535452	1
00298041	_synset_domain_topic_of	10554455	0
00218208	_hypernym	00217014	1
09824135	_hypernym	03881534	0
05696020	_derivationally_related_form	00456596	1
15295416	_synset_domain_topic_of	05554405	0
01474550	_derivationally_related_form	00212808	1
02051270	_derivationally_related_form	01841079	0
09814660	_derivationally_related_form	01011031	1
04592741	_has_part	00392950	0
02806261	_derivationally_related_form	01202728	1
02992032	_derivationally_related_form	02051270	0
00894552	_derivationally_related_form	00606335	1
01101391	_instance_hypernym	05554405	0
00234892	_derivationally_related_form	00138508	1
00797430	_member_meronym	00734927	0
02421921	_hypernym	02421374	1
02384275	_has_part	15286249	0
04080454	_derivationally_related_form	02175958	1
09999795	_also_see	00616083	0
10013242	_derivationally_related_form	01167981	1
02473431	_instance_hypernym	03424862	0
04989657	_derivationally_related_form	02009280	1
11499817	_derivationally_related_form	05527216	0
00593108	_derivationally_related_form	10474645	1
00329227	_instance_hypernym	01135529	0
00524530	_derivationally_related_form	00386392	1
00375071	_member_meronym	03686658	0
00257770	_derivationally_related_form	00037919	1
00870453	_hypernym	07674749	0
07308889	_derivationally_related_form	02155493	1
14514039	_hypernym	14708720	0
07129202	_derivationally_related_form	01054186	1
03656484	_verb_group	10256080	0
00952182	_hypernym	00978549	1
15068436	_member_meronym	07294019	0
00483801	_derivationally_related_form	14417146	1
03325769	_also_see	00748515	0
01217780	_derivationally_related_form	00406800	1
00251013	_hypernym	01517515	0
01675963	_derivationally_related_form	03579355	1
00375071	_similar_to	15155220	0
01979901	_derivationally_related_form	00052500	1
02593001	_verb_group	00716531	0
00870453	_derivationally_related_form	01385170	1
07884567	_verb_group	01789270	0
01686956	_derivationally_related_form	03931044	1
06481156	_synset_domain_topic_of	05044528	0
00747135	_derivationally_related_form	09824135	1
00385501	_instance_hypernym	13282550	0
07578363	_has_part	07578879	1
00164579	_member_meronym	13298011	0
00323856	_synset_domain_topic_of	00243918	1
01181902	_similar_to	07143624	0
04956594	_derivationally_related_form	09938672	1
03777126	_member_meronym	00227165	0
06207561	_derivationally_related_form	01778568	1
07377473	_synset_domain_topic_of	00609236	0
00990249	_hypernym	00989201	1
06669384	_instance_hypernym	09886010	0
02542280	_derivationally_related_form	01203676	1
02044866	_instance_hypernym	00439343	0
01415807	_derivationally_related_form	01160729	1
02020590	_also_see	00792471	0
01224517	_hypernym	01224031	1
01321854	_member_meronym	05044528	0
01143838	_verb_group	02092309	1
02463141	_synset_domain_topic_of	01918803	0
07269916	_derivationally_related_form	02851550	1
07350192	_instance_hypernym	02629256	0
00512843	_derivationally_related_form	00854150	1
00330160	_also_see	06255354	0
07129202	_hypernym	07128946	1
10100761	_hypernym	00248063	0
00282076	_derivationally_related_form	04695176	1
01134861	_has_part	13752172	0
00611972	_derivationally_related_form	10450303	1
02051270	_synset_domain_topic_of	10314952	0
02388143	_hypernym	02382948	1
06255354	_similar_to	07295629	0
02764765	_hypernym	02763740	1
00311113	_also_see	10690421	0
01300437	_derivationally_related_form	03879116	1
07458453	_also_see	08615374	0
00752493	_also_see	02486693	1
10004804	_also_see	14298102	0
05036394	_derivationally_related_form	00290302	1
00844298	_derivationally_related_form	02281485	0
00413876	_derivationally_related_form	10583387	1
09892831	_member_meronym	05726596	0
01852701	_derivationally_related_form	08521816	1
02465939	_has_part	13423922	0
01959294	_also_see	02371718	1
01612295	_hypernym	04405540	0
07445896	_derivationally_related_form	02689299	1
00021766	_derivationally_related_form	00129089	0
14818238	_hypernym	14806838	1
05657718	_instance_hypernym	06400271	0
13573666	_derivationally_related_form	00459114	1
07561590	_verb_group	07377473	0
02582042	_derivationally_related_form	06556692	1
00330160	_hypernym	01540693	0
00949974	_derivationally_related_form	00122106	1
14514039	_instance_hypernym	04660261	0
01955984	_hypernym	01841079	1
00663160	_derivationally_related_form	00375071	0
10646325	_derivationally_related_form	08440630	1
02702120	_has_part	00073584	0
04574999	_derivationally_related_form	01887020	1
05044528	_synset_domain_topic_of	09886010	0
00263947	_derivationally_related_form	00510364	1
02463141	_also_see	01671039	0
13877918	_hypernym	13907415	1
04987620	_verb_group	01466978	0
11465017	_derivationally_related_form	01902783	1
10140783	_also_see	00936620	0
04837931	_derivationally_related_form	01352067	1
00776059	_hypernym	07071483	0
10468559	_derivationally_related_form	02984104	1
03337140	_synset_domain_topic_of	04019696	0
06522501	_derivationally_related_form	02460619	1
04405540	_synset_domain_topic_of	13342987	0
02958343	_has_part	04294614	1
04874672	_has_part	10216403	0
00414179	_hypernym	00413239	1
01965464	_has_part	03216562	0
01542207	_derivationally_related_form	15049594	1
04882622	_derivationally_related_form	10115082	0
01680132	_derivationally_related_form	01896031	1
01400044	_instance_hypernym	14984973	0
02829696	_derivationally_related_form	02033137	1
05083328	_member_meronym	07370125	0
10216106	_derivationally_related_form	02271137	1
07696527	_derivationally_related_form	00843128	0
02502916	_derivationally_related_form	05790572	1
02688443	_hypernym	00167824	0
04188368	_synset_domain_topic_of	00314469	1
02686625	_synset_domain_topic_of	01809655	0
01167780	_derivationally_related_form	03200357	1
01079873	_synset_domain_topic_of	00749991	0
02269894	_hypernym	01143838	1
14298102	_similar_to	06722186	0
01128655	_derivationally_related_form	00579712	1
06556692	_hypernym	08548733	0
01535246	_derivationally_related_form	00255710	1
03777126	_verb_group	03042697	0
01234345	_derivationally_related_form	00421535	1
04876053	_derivationally_related_form	02536329	0
14541852	_derivationally_related_form	01036319	1
05554405	_derivationally_related_form	00161739	0
03701391	_hypernym	02760429	1
01451842	_verb_group	08276720	0
04952242	_derivationally_related_form	00278551	1
09824135	_hypernym	07538395	0
00036178	_verb_group	00036362	1
03327841	_hypernym	01841079	0
01593254	_derivationally_related_form	03659292	1
14483917	_member_meronym	01436518	0
02153709	_derivationally_related_form	00945401	1
05967773	_synset_domain_topic_of	10789118	0
07500414	_derivationally_related_form	02400037	1
02148109	_synset_domain_topic_of	10402086	0
09448361	_derivationally_related_form	09415938	1
00199659	_member_meronym	07795598	0
00796315	_derivationally_related_form	00065791	1
02629256	_hypernym	05728678	0
13344071	_hypernym	13329641	1
05829480	_verb_group	00418615	0
00788766	_hypernym	00786195	1
01201856	_similar_to	06613686	0
01639105	_derivationally_related_form	09935233	1
07307477	_similar_to	01789386	0
06843520	_derivationally_related_form	01589056	1
01037498	_member_meronym	06290637	0
09892831	_derivationally_related_form	02447001	1
02453321	_also_see	04472726	0
00073343	_derivationally_related_form	10000007	1
03773035	_member_meronym	02702120	0
03061505	_hypernym	03079741	1
06791372	_similar_to	08549733	0
00946105	_derivationally_related_form	06482401	1
13754293	_instance_hypernym	10789118	0
14479615	_synset_domain_topic_of	06084469	1
08284481	_member_meronym	00793271	0
01526521	_hypernym	01525720	1
00843128	_has_part	02829696	0
00341695	_derivationally_related_form	01506583	1
02460619	_has_part	07313814	0
01168569	_derivationally_related_form	01072262	1
02212646	_has_part	02043501	0
06181584	_hypernym	06172789	1
00403401	_instance_hypernym	00313647	0
02686568	_has_part	02932019	1
01229071	_similar_to	09302616	0
07368256	_derivationally_related_form	00363493	1
05820170	_has_part	00330160	0
14374432	_synset_domain_topic_of	06055946	1
03925226	_member_meronym	00307631	0
09827683	_hypernym	09918248	1
07071483	_synset_domain_topic_of	10690849	0
08871007	_has_part	08881674	1
07795598	_verb_group	03042697	0
09867956	_hypernym	10054657	1
01693727	_similar_to	05706954	0
01233993	_derivationally_related_form	10538272	1
02686625	_hypernym	00312784	0
00311338	_derivationally_related_form	07331013	1
02702830	_also_see	02536329	0
00338071	_derivationally_related_form	07409121	1
04939324	_instance_hypernym	06696483	0
00074038	_derivationally_related_form	10000007	1
00622068	_verb_group	03881534	0
04213626	_hypernym	04362025	1
07071483	_also_see	00074038	0
01037910	_derivationally_related_form	00512522	1
04605726	_hypernym	04876053	0
00796392	_derivationally_related_form	06542047	1
06400271	_instance_hypernym	04848262	0
13857486	_hypernym	13854649	1
00876442	_member_meronym	09415938	0
01881180	_derivationally_related_form	10660729	1
13983304	_has_part	00749991	0
05913275	_derivationally_related_form	01426077	1
14597158	_hypernym	00542809	0
00052043	_hypernym	00047945	1
04183329	_instance_hypernym	10140783	0
01688771	_derivationally_related_form	00900957	1
07550369	_similar_to	02686568	0
02544348	_derivationally_related_form	10072708	1
00784388	_member_meronym	00845523	0
10502576	_derivationally_related_form	02059462	1
00390842	_instance_hypernym	00752298	0
07127006	_derivationally_related_form	00031820	1
02451912	_verb_group	01400044	0
02227487	_derivationally_related_form	07254594	1
00392950	_instance_hypernym	01235258	0
15184170	_hypernym	15183802	1
07377473	_derivationally_related_form	15272029	0
01904293	_verb_group	01874568	1
02043501	_has_part	04183329	0
01955984	_derivationally_related_form	10403876	1
05245192	_similar_to	01201856	0
09889941	_hypernym	10744164	1
01688256	_verb_group	00499642	0
14292090	_derivationally_related_form	00336260	1
02773037	_verb_group	05160796	0
02828648	_hypernym	03519981	1
13752172	_also_see	07123870	0
01128071	_derivationally_related_form	04051825	1
00616083	_member_meronym	03519981	0
10298912	_derivationally_related_form	00595146	1
01169067	_hypernym	01907258	0
13757249	_derivationally_related_form	01919711	1
06253518	_hypernym	05160796	0
10369955	_derivationally_related_form	01126360	1
00161987	_derivationally_related_form	01903756	0
00730301	_derivationally_related_form	08512736	1
13298011	_verb_group	04162998	0
00189565	_derivationally_related_form	02525312	1
07123870	_hypernym	08553535	0
02079933	_derivationally_related_form	11512818	1
01496978	_similar_to	04154152	0
02058794	_also_see	02523275	1
13255145	_member_meronym	14560360	0
00470084	_derivationally_related_form	00233386	1
05768806	_also_see	00403401	0
06778102	_derivationally_related_form	10224098	1
04441528	_member_meronym	10491309	0
00617989	_derivationally_related_form	01233993	1
14687513	_member_meronym	03325769	0
01354006	_derivationally_related_form	04159354	1
08633957	_also_see	08875547	0
13417410	_hypernym	13416345	1
07884567	_instance_hypernym	15169873	0
02991122	_derivationally_related_form	02743547	1
10397001	_similar_to	04472726	0
01016778	_derivationally_related_form	09814660	1
03708036	_member_meronym	03708036	0
01912159	_derivationally_related_form	10727016	1
08278169	_hypernym	11499817	0
05064037	_derivationally_related_form	01689752	1
00045646	_derivationally_related_form	09619168	0
01826723	_derivationally_related_form	14038993	1
00074038	_verb_group	13342987	0
00747757	_derivationally_related_form	01352067	1
00209546	_derivationally_related_form	00208497	0
01248191	_derivationally_related_form	02502536	1
07294019	_derivationally_related_form	02749247	0
10678472	_hypernym	10525134	1
02851099	_member_meronym	02148109	0
08253815	_derivationally_related_form	01167981	1
13754293	_has_part	00863433	0
00046534	_derivationally_related_form	00828237	1
13497135	_hypernym	14483917	0
06767777	_derivationally_related_form	01058880	1
10502046	_derivationally_related_form	13372123	0
02518990	_hypernym	01432517	1
01540693	_also_see	00936620	0
00161739	_derivationally_related_form	01696648	1
08617963	_also_see	06516595	0
06624161	_has_part	07012534	1
03042697	_member_meronym	14012667	0
14455206	_derivationally_related_form	01088749	1
06253518	_member_meronym	04100174	0
00274941	_derivationally_related_form	00281101	1
05554405	_also_see	00919424	0
14490110	_derivationally_related_form	02348182	1
00663160	_also_see	04592741	0
01414288	_derivationally_related_form	00133338	1
01903756	_hypernym	07520612	0
10180580	_derivationally_related_form	01116585	1
00350380	_instance_hypernym	06663940	0
02744977	_derivationally_related_form	06892016	1
01105186	_instance_hypernym	02270165	0
06615561	_derivationally_related_form	01505254	1
06613686	_similar_to	01689379	0
02066939	_derivationally_related_form	07405893	1
05044528	_hypernym	15010703	0
05913275	_derivationally_related_form	01022906	1
14597158	_has_part	06535222	0
02559199	_derivationally_related_form	10008716	1
00820801	_hypernym	02958343	0
14574846	_derivationally_related_form	00864159	1
01101391	_has_part	00318735	0
10570019	_derivationally_related_form	00599472	1
01079873	_instance_hypernym	00327824	0
04473432	_has_part	03671473	1
04472726	_hypernym	10753182	0
10792856	_hypernym	10241300	1
13903387	_member_meronym	06099269	0
01236795	_hypernym	01236164	1
02465939	_also_see	08878016	0
01350699	_derivationally_related_form	00404726	1
07193184	_has_part	01693727	0
08543081	_hypernym	08523483	1
01466978	_has_part	03965907	0
05981230	_derivationally_related_form	00708980	1
10004804	_synset_domain_topic_of	06481156	0
02733122	_verb_group	02202928	1
06255354	_member_meronym	08121867	0
00788184	_derivationally_related_form	07193184	1
01819147	_also_see	13451508	0
04175380	_hypernym	04381994	1
07674749	_has_part	02992032	0
06554981	_derivationally_related_form	02273293	1
03520811	_verb_group	03337140	0
02544348	_derivationally_related_form	14541852	1
10690421	_similar_to	06950209	0
00281101	_derivationally_related_form	00274941	1
03961939	_derivationally_related_form	02015598	0
01362736	_derivationally_related_form	00717208	1
01415162	_hypernym	02020590	0
01000214	_derivationally_related_form	10516874	1
05762149	_has_part	07071483	0
00695523	_derivationally_related_form	01179707	1
13459322	_has_part	01721556	0
00433232	_hypernym	00156601	1
07575510	_instance_hypernym	07575510	0
06275634	_hypernym	06253690	1
00263044	_similar_to	08167779	0
00036362	_derivationally_related_form	00255710	1
00233386	_member_meronym	10426454	0
02064131	_derivationally_related_form	08182716	1
14360459	_verb_group	13390857	0
00852506	_hypernym	00851933	1
00542809	_derivationally_related_form	05160796	0
02228698	_derivationally_related_form	01083645	1
04497005	_synset_domain_topic_of	09221070	0
02774630	_hypernym	02974697	1
00073584	_instance_hypernym	01451842	0
10682380	_derivationally_related_form	01011031	1
00328128	_instance_hypernym	03350602	0
00775831	_derivationally_related_form	00202284	1
03519981	_instance_hypernym	01789270	0
01421622	_derivationally_related_form	03573282	1
02453321	_has_part	02422026	0
00768778	_derivationally_related_form	10775379	1
00867231	_has_part	03327841	0
03401721	_hypernym	03294048	1
06876144	_instance_hypernym	00885925	0
10182499	_derivationally_related_form	08078020	1
00622068	_member_meronym	14560360	0
01097500	_derivationally_related_form	01157850	1
02051270	_member_meronym	01186428	0
10012815	_derivationally_related_form	00650016	1
08549733	_similar_to	00375071	0
00850192	_derivationally_related_form	10561320	1
05826291	_synset_domain_topic_of	00233386	0
00095971	_derivationally_related_form	00384620	1
05657718	_has_part	02122580	0
02136271	_synset_domain_topic_of	06094774	1
08276720	_derivationally_related_form	00045646	0
14539960	_hypernym	14539268	1
01215694	_has_part	13754293	0
00046109	_derivationally_related_form	00299580	1
02839200	_synset_domain_topic_of	04337740	0
00828779	_also_see	01716227	1
10426454	_similar_to	00874621	0
02355596	_hypernym	01111816	1
02384275	_has_part	05042871	0
00754731	_hypernym	00752764	1
14574846	_hypernym	06722186	0
00748515	_derivationally_related_form	01172275	1
15171008	_synset_domain_topic_of	00952841	0
01158596	_derivationally_related_form	14708720	1
00609236	_hypernym	00311113	0
01392080	_derivationally_related_form	01896031	1
02593354	_verb_group	07458453	0
00331655	_derivationally_related_form	01864634	1
03656484	_instance_hypernym	10152083	0
00650016	_derivationally_related_form	05748054	1
01470225	_also_see	07575510	0
02970685	_has_part	04162706	1
02593354	_instance_hypernym	00328128	0
10008716	_derivationally_related_form	00388635	1
08875547	_also_see	00164579	0
04692157	_derivationally_related_form	00263044	1
02641463	_hypernym	00542809	0
13416345	_derivationally_related_form	02262139	1
04100174	_synset_domain_topic_of	00945853	0
06790042	_hypernym	06789411	1
00843128	_member_meronym	00797430	0
07354731	_derivationally_related_form	01111028	1
03350602	_instance_hypernym	02378183	0
01457954	_derivationally_related_form	13534274	1
02644234	_has_part	01985029	0
14868243	_hypernym	14580897	1
02156532	_hypernym	01229071	0
02531625	_derivationally_related_form	00636461	1
01454246	_also_see	10402086	0
01785971	_derivationally_related_form	00758972	1
10491309	_has_part	01918803	0
02531422	_also_see	01076793	1
07182485	_verb_group	03961939	0
10191192	_hypernym	10557854	1
01298283	_member_meronym	13372123	0
02984104	_derivationally_related_form	10467395	1
00375071	_also_see	01612295	0
07129202	_derivationally_related_form	01055404	1
07412092	_synset_domain_topic_of	14597158	0
02120458	_derivationally_related_form	04648207	1
06696483	_member_meronym	04987620	0
08954057	_instance_hypernym	09203827	1
15010703	_instance_hypernym	05017458	0
08161068	_hypernym	08160276	1
08615374	_instance_hypernym	01524359	0
01532589	_derivationally_related_form	09927089	1
08878016	_has_part	08559155	0
00386392	_also_see	00404202	1
10216403	_verb_group	04530566	0
00550117	_derivationally_related_form	00196084	1
08873412	_member_meronym	00311113	0
01029500	_derivationally_related_form	06343520	1
04718563	_hypernym	00542809	0
07407777	_derivationally_related_form	01377032	1
07182485	_similar_to	00206927	0
[truncated: 858 more rows]
