# Supplementary material
Source: ML conference proceedings conference paper supplement (https://proceedings.neurips.cc/paper_files/paper/2021/hash/0fd600c953cde8121262e322ef09f70e-Abstract.html)
Supplement: Supplementary file 1 [file 0fd600c953cde8121262e322ef09f70e-Supplemental.zip › Supplementary_Material_Paper_8745/data/GraIL-BM_WN18RR_v4/train/train.txt]

02391803	_derivationally_related_form	00165178
05552607	_has_part	05553049
01015244	_derivationally_related_form	06648207
00909363	_derivationally_related_form	07539367
00114095	_derivationally_related_form	01871680
00226618	_derivationally_related_form	04840981
10090498	_derivationally_related_form	02248465
05888929	_derivationally_related_form	10706812
01020005	_derivationally_related_form	10369528
09424489	_hypernym	09190918
10225219	_derivationally_related_form	06161718
05464104	_hypernym	05229622
13968547	_hypernym	00024720
08664443	_derivationally_related_form	01494310
05978159	_derivationally_related_form	01629958
05563770	_hypernym	05560244
01549420	_derivationally_related_form	06428216
09626589	_derivationally_related_form	02154508
00831651	_derivationally_related_form	10786033
06711159	_hypernym	06710546
02298471	_derivationally_related_form	00082081
00911350	_derivationally_related_form	10335246
01261712	_hypernym	00242808
06196584	_hypernym	06193203
13844212	_derivationally_related_form	02724417
02154508	_derivationally_related_form	05808218
05511618	_has_part	05388805
01865197	_derivationally_related_form	05147940
02584981	_also_see	01129977
02466134	_hypernym	02556126
00690614	_derivationally_related_form	06208751
01821423	_derivationally_related_form	05682950
02118933	_derivationally_related_form	05818741
01813499	_derivationally_related_form	05829782
02251743	_also_see	02284803
03575240	_derivationally_related_form	02340543
01222360	_also_see	02318464
02257767	_derivationally_related_form	05696425
01705257	_derivationally_related_form	07180570
01494310	_also_see	02494356
00348746	_derivationally_related_form	00235435
05552607	_has_part	05385161
02387034	_derivationally_related_form	10722385
00261029	_derivationally_related_form	00205046
00032613	_hypernym	00031921
14421139	_derivationally_related_form	00713167
00764902	_derivationally_related_form	01026262
05775407	_derivationally_related_form	00917772
00827730	_derivationally_related_form	01214171
04800359	_hypernym	04723816
00041899	_hypernym	00030358
00070816	_derivationally_related_form	07289014
01156834	_also_see	01197980
01662771	_hypernym	01659248
02657219	_verb_group	02700104
00973077	_hypernym	00952963
06643408	_derivationally_related_form	00820976
05996646	_derivationally_related_form	00599992
06686736	_derivationally_related_form	00803815
02428924	_derivationally_related_form	08310389
01476483	_hypernym	02451370
07528212	_derivationally_related_form	01812324
03894379	_derivationally_related_form	02467662
07176682	_hypernym	07175241
00967625	_derivationally_related_form	08055150
10383816	_derivationally_related_form	00710005
01782432	_derivationally_related_form	10240082
05917477	_derivationally_related_form	01642924
15267536	_derivationally_related_form	02609764
14000403	_derivationally_related_form	09777353
00681429	_derivationally_related_form	00874806
02260085	_derivationally_related_form	01091905
05564590	_has_part	05373790
07348399	_derivationally_related_form	01990281
01041762	_derivationally_related_form	05978623
04320126	_derivationally_related_form	00022686
02023107	_verb_group	02428924
13911151	_hypernym	13870805
08108972	_member_meronym	08110373
11498203	_hypernym	11458624
04321534	_hypernym	03748886
00004227	_hypernym	00001740
00418903	_derivationally_related_form	02574205
01021420	_derivationally_related_form	06511874
05732756	_derivationally_related_form	00654625
05481095	_has_part	05343542
00279835	_derivationally_related_form	01835496
03257343	_derivationally_related_form	01735308
00980453	_derivationally_related_form	00940842
04668819	_hypernym	04616059
02549847	_hypernym	02549581
01666717	_hypernym	01640550
00004605	_hypernym	00105333
05474346	_has_part	05473928
05833840	_derivationally_related_form	01637166
00592883	_derivationally_related_form	14411981
09786922	_derivationally_related_form	01462005
00550282	_derivationally_related_form	04754440
00692329	_derivationally_related_form	00002137
05559908	_hypernym	05225090
01794668	_derivationally_related_form	10296618
02354287	_derivationally_related_form	13911151
02464693	_also_see	01222360
00612160	_derivationally_related_form	00084230
00875394	_hypernym	01010118
00594058	_derivationally_related_form	07554856
10292316	_hypernym	10284064
05761380	_hypernym	05760202
13986679	_derivationally_related_form	01816431
02290956	_derivationally_related_form	05142641
00829107	_derivationally_related_form	01323449
05595083	_synset_domain_topic_of	06057539
01796346	_derivationally_related_form	07528470
01649999	_verb_group	01767949
01008801	_derivationally_related_form	00710005
01346804	_hypernym	00146138
00660971	_hypernym	00681429
00355547	_hypernym	00354884
02938886	_hypernym	03699975
01698271	_synset_domain_topic_of	00929718
09792237	_derivationally_related_form	05217168
01762839	_derivationally_related_form	00802318
10763245	_hypernym	10630188
01080366	_hypernym	00029378
05600637	_has_part	05602548
03674440	_derivationally_related_form	02622234
08107499	_hypernym	07992450
00359614	_derivationally_related_form	01456463
01439190	_verb_group	01082454
06000644	_derivationally_related_form	10301261
00888009	_hypernym	00886281
00082308	_derivationally_related_form	03075768
00141806	_derivationally_related_form	00663353
01326291	_synset_domain_topic_of	00017222
05035961	_derivationally_related_form	00873603
06613056	_derivationally_related_form	01705257
10564224	_derivationally_related_form	02400378
00042311	_hypernym	00030358
01590747	_hypernym	00173338
01133876	_also_see	01372049
05541645	_hypernym	05276860
07324673	_derivationally_related_form	00125841
00838098	_derivationally_related_form	01156834
00510050	_also_see	00839619
01184814	_derivationally_related_form	02372605
00570590	_also_see	00186616
02469914	_hypernym	01886756
00833702	_derivationally_related_form	00893955
03600977	_derivationally_related_form	02660147
01672168	_derivationally_related_form	08434259
02679415	_derivationally_related_form	02324478
01101329	_hypernym	01094725
01549420	_hypernym	01549187
01770802	_hypernym	01767949
01548193	_also_see	02513269
14420954	_hypernym	14418395
00003553	_derivationally_related_form	00367685
01116026	_hypernym	01113068
00831191	_has_part	00835267
00654885	_derivationally_related_form	00082081
00380083	_derivationally_related_form	01462468
05032565	_hypernym	05029706
01439190	_derivationally_related_form	09901143
13365286	_hypernym	13331778
02806907	_derivationally_related_form	05765415
00037457	_synset_domain_topic_of	06060845
03699975	_derivationally_related_form	01623967
10595647	_derivationally_related_form	02121511
14286549	_hypernym	14298815
01783158	_also_see	01781478
02326355	_hypernym	01315613
01156834	_derivationally_related_form	00838098
09862345	_derivationally_related_form	02656763
05388805	_hypernym	05298729
02169352	_derivationally_related_form	00879759
04630689	_derivationally_related_form	00859153
00727791	_derivationally_related_form	06763681
05999797	_hypernym	05996646
02304982	_derivationally_related_form	06593099
07942152	_derivationally_related_form	00451461
02796412	_hypernym	02796623
00583990	_also_see	02504131
01222360	_also_see	02464693
07747455	_hypernym	09429387
01072236	_hypernym	00407535
00697589	_derivationally_related_form	00162632
00947077	_derivationally_related_form	05124057
07373602	_derivationally_related_form	00243124
05432948	_has_part	05434557
05329735	_hypernym	05327767
00923995	_derivationally_related_form	01617192
01782432	_hypernym	01804961
10461424	_hypernym	00007347
01194938	_hypernym	00126264
10191613	_derivationally_related_form	02290956
00360650	_also_see	01548193
00042457	_derivationally_related_form	14006945
01548718	_derivationally_related_form	06428646
05703429	_derivationally_related_form	00732552
01767949	_verb_group	02108791
01827858	_derivationally_related_form	10677713
00164816	_derivationally_related_form	10056103
00484166	_derivationally_related_form	00210518
06757057	_derivationally_related_form	00835294
01458302	_hypernym	05470189
00923995	_derivationally_related_form	01621555
02501278	_derivationally_related_form	01195867
07324673	_derivationally_related_form	00426581
01222360	_also_see	02179279
04831727	_hypernym	04840011
03050026	_hypernym	03122748
05442131	_hypernym	09224911
01156112	_also_see	02533313
10752480	_derivationally_related_form	02574205
07450651	_derivationally_related_form	02490877
00947439	_derivationally_related_form	07230502
10336234	_hypernym	10791221
01384439	_derivationally_related_form	01014066
09798534	_derivationally_related_form	06740919
00779061	_derivationally_related_form	01062817
15003969	_derivationally_related_form	00173338
02549847	_derivationally_related_form	00654885
07325190	_derivationally_related_form	01628449
06782680	_derivationally_related_form	00633443
00586262	_derivationally_related_form	01088923
02245993	_hypernym	02244956
00958896	_hypernym	01080366
10407726	_hypernym	09984659
14842091	_derivationally_related_form	00004227
02207206	_also_see	02323286
05225090	_hypernym	05220461
01797051	_derivationally_related_form	13989280
01590747	_derivationally_related_form	05534333
01639714	_derivationally_related_form	05633385
05034225	_hypernym	05190804
01932973	_derivationally_related_form	13954253
00727791	_hypernym	00726300
01815185	_derivationally_related_form	14445749
09902954	_derivationally_related_form	02490877
03967942	_derivationally_related_form	01422886
01754737	_derivationally_related_form	00359238
03082979	_synset_domain_topic_of	06128570
01015244	_hypernym	00831651
05553288	_hypernym	05225090
00953559	_derivationally_related_form	01092366
13814041	_derivationally_related_form	10332385
03081021	_derivationally_related_form	02621395
00115157	_hypernym	00126264
02560767	_hypernym	02367363
02245993	_derivationally_related_form	01110274
00360143	_derivationally_related_form	01321002
05788149	_derivationally_related_form	00698855
02556126	_derivationally_related_form	02354537
01091905	_hypernym	01090446
00756331	_derivationally_related_form	00837288
00169651	_hypernym	00109660
02432530	_derivationally_related_form	01136519
01364008	_member_meronym	01364162
01815628	_derivationally_related_form	01800349
01651444	_derivationally_related_form	00923995
00377169	_derivationally_related_form	01259691
07252764	_hypernym	06691442
00940412	_derivationally_related_form	01634424
05633385	_derivationally_related_form	01638368
00588998	_hypernym	00586262
01815185	_derivationally_related_form	10518349
02400378	_derivationally_related_form	13558696
01198307	_synset_domain_topic_of	08441203
00290740	_derivationally_related_form	00351638
00941974	_derivationally_related_form	01313923
01292885	_derivationally_related_form	07985223
02257767	_derivationally_related_form	07443761
06782019	_derivationally_related_form	01027668
02376089	_hypernym	01090335
10665698	_derivationally_related_form	00607405
01933900	_derivationally_related_form	01142519
10227985	_synset_domain_topic_of	08441203
07251984	_hypernym	06691442
05318831	_has_part	05324553
00390215	_derivationally_related_form	03161725
01127245	_hypernym	01127019
04748836	_derivationally_related_form	02666239
07496463	_hypernym	07494363
07373602	_derivationally_related_form	00367685
00608808	_derivationally_related_form	05786372
04892084	_hypernym	04616059
02270342	_also_see	00849357
06066555	_derivationally_related_form	09868270
13904843	_derivationally_related_form	01279631
04762355	_derivationally_related_form	00625393
00623151	_verb_group	00690614
03673971	_derivationally_related_form	01285440
01899262	_also_see	01996574
01015244	_derivationally_related_form	10703905
02495922	_also_see	01870889
02284803	_synset_domain_topic_of	00766234
00681429	_derivationally_related_form	03735637
01494310	_also_see	01570403
04620216	_hypernym	04616059
01233397	_derivationally_related_form	02612762
05491612	_hypernym	05474738
05549830	_hypernym	05220461
01494310	_also_see	02578008
05784831	_derivationally_related_form	02166460
02338975	_derivationally_related_form	10681557
15267536	_derivationally_related_form	02610628
06389230	_derivationally_related_form	01548718
01284271	_hypernym	01339505
02304982	_derivationally_related_form	00372013
05558717	_hypernym	05220461
00896141	_hypernym	00896497
00145218	_derivationally_related_form	01069391
01629958	_derivationally_related_form	10280674
01369663	_also_see	00956131
08663354	_hypernym	08510666
00191142	_hypernym	00037396
02410855	_verb_group	02413480
00560893	_derivationally_related_form	00358931
00180413	_derivationally_related_form	00719231
10510339	_derivationally_related_form	00632627
00386915	_derivationally_related_form	01552519
05928513	_derivationally_related_form	00938247
04800359	_derivationally_related_form	01686439
10461747	_derivationally_related_form	02536557
07126734	_derivationally_related_form	01046932
00426581	_hypernym	00422090
01900150	_derivationally_related_form	00212173
00820976	_derivationally_related_form	06643408
05891783	_hypernym	05888929
05559727	_has_part	05570129
02137907	_derivationally_related_form	08510666
05131283	_derivationally_related_form	01974062
00883611	_derivationally_related_form	02258291
05462057	_has_part	05585383
01110274	_hypernym	01106808
10490699	_derivationally_related_form	00954608
09279458	_derivationally_related_form	00918872
02395782	_hypernym	01650610
00643250	_derivationally_related_form	01685313
04812268	_derivationally_related_form	00849357
05600637	_has_part	05602132
13532886	_hypernym	13526110
02729023	_derivationally_related_form	08572467
10162991	_derivationally_related_form	02440244
05535484	_has_part	05536370
05280365	_hypernym	05470189
05434927	_has_part	05442131
13413493	_derivationally_related_form	00695226
05943066	_hypernym	05941423
01507134	_also_see	01372049
08082236	_hypernym	07965085
00630026	_derivationally_related_form	06158346
02230772	_also_see	00742320
01017987	_derivationally_related_form	01995549
00109660	_derivationally_related_form	03005920
02645007	_derivationally_related_form	05121418
11414608	_derivationally_related_form	00701040
00043411	_synset_domain_topic_of	06095022
00359903	_derivationally_related_form	01321002
11412727	_hypernym	11410625
13518963	_derivationally_related_form	00043411
04897762	_hypernym	04616059
02080577	_derivationally_related_form	04792127
00908351	_derivationally_related_form	07252206
02560164	_derivationally_related_form	01127019
01761706	_derivationally_related_form	14037011
01311378	_derivationally_related_form	03302121
07214432	_derivationally_related_form	02128066
04840981	_hypernym	04849241
00941777	_hypernym	00908492
00363260	_hypernym	00351485
01332730	_derivationally_related_form	04151940
04693384	_derivationally_related_form	01279631
01210737	_hypernym	01206218
06763681	_derivationally_related_form	01015866
00888009	_derivationally_related_form	06685198
01275562	_also_see	02500884
00882948	_hypernym	00856824
01241331	_derivationally_related_form	00904690
01545883	_hypernym	02604760
05831939	_derivationally_related_form	01789514
00633443	_derivationally_related_form	06782680
14445379	_hypernym	13920835
04836683	_derivationally_related_form	02406916
06806469	_derivationally_related_form	00836236
05564590	_has_part	05576194
09984659	_hypernym	09612848
05311054	_has_part	05317354
05496990	_has_part	05299927
14311348	_hypernym	14299637
00644503	_hypernym	00635850
00588221	_derivationally_related_form	00532892
01024190	_derivationally_related_form	06766190
01771535	_derivationally_related_form	00026192
05593017	_hypernym	05275651
05545047	_hypernym	05542893
01109467	_derivationally_related_form	02257370
05945642	_derivationally_related_form	00690614
04631067	_derivationally_related_form	01133876
10418841	_derivationally_related_form	00766418
00904690	_derivationally_related_form	09798534
00745637	_hypernym	00745005
01698271	_derivationally_related_form	10794014
05200169	_hypernym	04723816
00875141	_derivationally_related_form	06671637
14322699	_derivationally_related_form	00065070
00368109	_derivationally_related_form	00003553
13989051	_derivationally_related_form	01364008
02460502	_also_see	00631391
07139700	_hypernym	06252138
01685601	_derivationally_related_form	01104637
01059123	_derivationally_related_form	06763681
00109660	_derivationally_related_form	07296428
14485526	_derivationally_related_form	01009240
00055539	_hypernym	00055142
00841628	_derivationally_related_form	01191838
03055809	_derivationally_related_form	00612612
06193203	_hypernym	00023271
01209678	_verb_group	02127613
00987071	_hypernym	01001294
00906367	_synset_domain_topic_of	08441203
00642098	_synset_domain_topic_of	06004067
00116376	_derivationally_related_form	01974062
00327031	_derivationally_related_form	00006484
00355252	_synset_domain_topic_of	00973077
05869584	_has_part	05867413
00964343	_derivationally_related_form	01092366
06193727	_hypernym	06193203
05495172	_has_part	05605192
05075602	_derivationally_related_form	01711749
02293321	_derivationally_related_form	10001058
00280586	_derivationally_related_form	01850315
03269401	_has_part	04413151
09831962	_hypernym	00007846
00712135	_derivationally_related_form	09887034
01260867	_hypernym	00242808
01380638	_derivationally_related_form	01014066
01354673	_derivationally_related_form	03673971
01057200	_derivationally_related_form	02338975
00003553	_derivationally_related_form	02625016
07539367	_derivationally_related_form	00909363
02200686	_derivationally_related_form	10025730
01293389	_derivationally_related_form	07988857
01020005	_derivationally_related_form	05703429
00548802	_derivationally_related_form	00837288
00742320	_hypernym	02231661
00209943	_derivationally_related_form	00352826
07252378	_derivationally_related_form	00765649
00112997	_derivationally_related_form	01231252
07514345	_hypernym	07513508
10160012	_derivationally_related_form	01789514
01209953	_derivationally_related_form	05566504
01904930	_derivationally_related_form	00283568
01311103	_derivationally_related_form	10012989
10721470	_derivationally_related_form	02245993
04254777	_hypernym	03540267
06206800	_hypernym	06193203
13570574	_derivationally_related_form	00256507
10421956	_derivationally_related_form	04833276
00682230	_verb_group	00681429
00240293	_derivationally_related_form	05090441
00148978	_derivationally_related_form	01354673
02440244	_hypernym	02439501
01802219	_derivationally_related_form	01072236
00239910	_hypernym	00235435
00654625	_derivationally_related_form	01016832
00938247	_hypernym	00939277
01082606	_derivationally_related_form	01239064
07450651	_derivationally_related_form	02578510
04849241	_hypernym	04846770
05564590	_has_part	05565696
09629065	_hypernym	09628382
05311054	_derivationally_related_form	02167052
01374582	_derivationally_related_form	00595630
05786372	_hypernym	05785067
05563770	_has_part	05579944
07515790	_derivationally_related_form	01765392
04849241	_derivationally_related_form	01129977
08060446	_derivationally_related_form	01621555
02425913	_derivationally_related_form	00211110
07199565	_derivationally_related_form	00815686
04759849	_derivationally_related_form	00013160
04782878	_derivationally_related_form	00644839
05343718	_hypernym	05333777
06740919	_hypernym	06740644
00034213	_hypernym	00029677
01010118	_hypernym	01009240
00210797	_hypernym	00210518
01557774	_hypernym	00109660
01370590	_also_see	02035337
00205046	_derivationally_related_form	00261029
10162991	_hypernym	09623038
01440801	_derivationally_related_form	13904843
01817500	_derivationally_related_form	05166805
00835903	_derivationally_related_form	06756407
08441203	_hypernym	07951464
09469285	_synset_domain_topic_of	00015388
08063446	_hypernym	08059870
09774783	_derivationally_related_form	00876332
06367373	_derivationally_related_form	00116619
02981759	_derivationally_related_form	00883297
00253761	_verb_group	00171852
01697816	_hypernym	01617192
00482473	_derivationally_related_form	10160412
00055871	_synset_domain_topic_of	00017222
00315986	_derivationally_related_form	01435380
05849284	_derivationally_related_form	02697950
00661824	_verb_group	00662182
10102800	_derivationally_related_form	00054628
01632411	_derivationally_related_form	05633385
06740183	_derivationally_related_form	00896803
02453889	_derivationally_related_form	10677713
06613056	_hypernym	06400510
06389230	_hypernym	05128519
00874806	_hypernym	00874067
02387034	_verb_group	02553697
05314255	_hypernym	05492259
02308741	_derivationally_related_form	10670310
00732552	_derivationally_related_form	01002956
05468849	_has_part	05469032
03722007	_derivationally_related_form	00921738
00140652	_derivationally_related_form	01210737
00127531	_derivationally_related_form	00227507
02179279	_also_see	01222360
08482271	_synset_domain_topic_of	08199025
06037298	_derivationally_related_form	09855630
00661091	_hypernym	00657604
01635176	_hypernym	01629276
02540670	_derivationally_related_form	10583250
05600637	_has_part	05479314
00779601	_derivationally_related_form	15274074
02376429	_derivationally_related_form	01022008
00770437	_derivationally_related_form	00156390
00019792	_derivationally_related_form	09821253
05305614	_hypernym	05297523
07993109	_derivationally_related_form	02665803
01792567	_derivationally_related_form	05830059
04626280	_derivationally_related_form	00853776
02515214	_similar_to	02513740
00258665	_derivationally_related_form	00376400
02413480	_derivationally_related_form	09632518
01894758	_similar_to	01895630
10686313	_derivationally_related_form	01814815
05342214	_hypernym	05333777
00776523	_derivationally_related_form	04687333
00689205	_derivationally_related_form	06782680
00539546	_derivationally_related_form	00156390
00835032	_hypernym	13440063
06671637	_derivationally_related_form	00882948
01041111	_derivationally_related_form	00886978
01661243	_hypernym	01654628
00205885	_derivationally_related_form	02679415
00668099	_verb_group	01794668
04687333	_derivationally_related_form	01806505
00190999	_derivationally_related_form	14841267
02609764	_derivationally_related_form	06398401
05563266	_has_part	05578095
01507134	_also_see	00506299
07296428	_hypernym	07283608
02518161	_derivationally_related_form	04910377
01240210	_hypernym	01239064
00433778	_hypernym	00151689
07251984	_derivationally_related_form	02554922
06763681	_derivationally_related_form	01024190
00879356	_verb_group	01076615
01211699	_hypernym	01210737
04748836	_derivationally_related_form	00651991
05373790	_hypernym	05418717
02261464	_synset_domain_topic_of	01090446
06741099	_synset_domain_topic_of	08441203
00575741	_derivationally_related_form	02407987
01549291	_also_see	02037272
00827730	_derivationally_related_form	09774783
05474346	_hypernym	05475681
02513740	_also_see	01549291
14421139	_hypernym	14418395
00623151	_hypernym	00588888
05503705	_has_part	05380697
00261705	_derivationally_related_form	03932203
13859043	_derivationally_related_form	00126264
00126264	_derivationally_related_form	03005920
07491981	_hypernym	07491708
02586121	_derivationally_related_form	05194043
05217168	_derivationally_related_form	09792237
00022686	_hypernym	00019448
02539788	_derivationally_related_form	01129532
10399299	_derivationally_related_form	00903385
06161718	_derivationally_related_form	10225219
05395548	_hypernym	05395286
04673965	_derivationally_related_form	00422090
00209943	_hypernym	00199130
00142191	_derivationally_related_form	03384535
01261712	_derivationally_related_form	01761120
01439190	_hypernym	01212572
13524925	_hypernym	13455487
13247554	_hypernym	13244109
05548840	_derivationally_related_form	01239359
02294179	_derivationally_related_form	01085098
04693900	_derivationally_related_form	01309143
01647229	_hypernym	01641914
01130169	_hypernym	01128193
02035337	_also_see	01549291
00598954	_derivationally_related_form	05808218
00882948	_derivationally_related_form	06671637
05540121	_has_part	05230603
02589576	_derivationally_related_form	00798245
04687333	_derivationally_related_form	02376277
02106506	_derivationally_related_form	02868326
02251743	_derivationally_related_form	13278375
01999423	_hypernym	01999218
01955508	_hypernym	01950798
01241767	_derivationally_related_form	00896803
00908909	_hypernym	00908492
07938773	_hypernym	00031264
02820210	_hypernym	03050026
01062817	_derivationally_related_form	00779061
01082454	_verb_group	01439190
05600637	_has_part	05313535
00662589	_verb_group	00662182
00584367	_hypernym	00582388
04544979	_derivationally_related_form	01882170
05595083	_derivationally_related_form	02354287
00112312	_derivationally_related_form	01447632
01089483	_derivationally_related_form	10421956
01775535	_derivationally_related_form	01459422
13940456	_derivationally_related_form	02397637
00887463	_derivationally_related_form	01041111
13253612	_hypernym	13253255
05501185	_has_part	05500992
05833840	_derivationally_related_form	00607780
10483890	_derivationally_related_form	01881696
00685638	_derivationally_related_form	04863969
00442267	_derivationally_related_form	14481080
05532795	_hypernym	05328867
05802185	_derivationally_related_form	00637259
00143251	_derivationally_related_form	00230276
00190999	_hypernym	00126264
00043411	_derivationally_related_form	13518963
00071178	_derivationally_related_form	00421437
00186616	_also_see	00570590
00081836	_hypernym	00081572
02367363	_derivationally_related_form	00037396
01974062	_derivationally_related_form	07348399
01474513	_also_see	01612053
02407987	_derivationally_related_form	00575741
00680841	_derivationally_related_form	06196584
05305806	_hypernym	05225090
00061290	_derivationally_related_form	01955127
01649999	_derivationally_related_form	14578471
00803325	_hypernym	00802318
04754440	_derivationally_related_form	00550282
00955148	_hypernym	00928630
00119074	_derivationally_related_form	05748285
02490877	_hypernym	02486932
06733939	_synset_domain_topic_of	08441203
07208338	_hypernym	07160883
00043195	_derivationally_related_form	01637982
01113068	_derivationally_related_form	02242464
05833840	_derivationally_related_form	01636397
08420278	_hypernym	08054721
06740402	_hypernym	06740183
01646866	_derivationally_related_form	09184975
00765977	_derivationally_related_form	04836683
02284951	_derivationally_related_form	13299651
05651399	_derivationally_related_form	00610010
00988028	_derivationally_related_form	01981699
00431552	_hypernym	00426928
14287113	_derivationally_related_form	01322675
10080869	_hypernym	10399491
05651399	_derivationally_related_form	00604576
02257370	_derivationally_related_form	00040152
05784242	_derivationally_related_form	00628491
01886756	_derivationally_related_form	01830946
00918872	_derivationally_related_form	09279458
01035530	_verb_group	00805376
00610010	_derivationally_related_form	05651399
04413151	_hypernym	03093792
00883611	_derivationally_related_form	00240131
02309341	_derivationally_related_form	02116118
00245457	_hypernym	00253761
00050693	_derivationally_related_form	02625016
04637923	_derivationally_related_form	01762839
11083656	_derivationally_related_form	02551602
06136258	_hypernym	05999797
02391803	_hypernym	02475922
10786033	_derivationally_related_form	02128286
04826771	_derivationally_related_form	01781478
02467662	_derivationally_related_form	00784533
01435380	_derivationally_related_form	10724699
01822936	_derivationally_related_form	07505047
05328867	_hypernym	05327767
07326557	_hypernym	07323922
00905399	_hypernym	00903385
11415084	_synset_domain_topic_of	06095022
05849284	_hypernym	05849040
00156625	_derivationally_related_form	02585050
02138659	_derivationally_related_form	04677514
00938247	_derivationally_related_form	07170753
13365698	_derivationally_related_form	02217695
01022008	_derivationally_related_form	02375131
05785067	_derivationally_related_form	00813044
02107248	_hypernym	02106506
01282014	_derivationally_related_form	04729328
00654625	_derivationally_related_form	01012712
00630380	_derivationally_related_form	05785508
05250659	_has_part	05254197
00235435	_hypernym	00199130
14411981	_hypernym	13932421
02343056	_derivationally_related_form	02787772
13489037	_derivationally_related_form	00094460
10407726	_derivationally_related_form	01844431
01640855	_derivationally_related_form	00035189
00719231	_verb_group	00686447
02308741	_hypernym	02199590
02733187	_derivationally_related_form	05395690
02163746	_derivationally_related_form	00880269
01207609	_derivationally_related_form	02555434
05541231	_has_part	05232691
05804491	_hypernym	05803379
05838176	_derivationally_related_form	00699815
00495998	_verb_group	02428487
00662589	_verb_group	00663353
00839619	_also_see	00834198
02036578	_also_see	02513269
01818835	_hypernym	01818235
05634219	_derivationally_related_form	01634142
01621555	_derivationally_related_form	03129123
08310389	_derivationally_related_form	02428924
00494907	_also_see	00150202
05300231	_hypernym	05299178
02037272	_also_see	02513740
00583461	_derivationally_related_form	10631941
01478002	_derivationally_related_form	03967942
02373015	_derivationally_related_form	00575741
00419644	_hypernym	00418025
00654625	_derivationally_related_form	07974025
14286549	_derivationally_related_form	01309143
01133876	_derivationally_related_form	04631067
08063446	_derivationally_related_form	02244956
01781478	_derivationally_related_form	04826771
00841628	_derivationally_related_form	02333225
02609764	_derivationally_related_form	15266911
02150948	_verb_group	02129289
06684383	_hypernym	06598915
02623529	_derivationally_related_form	11665372
01636397	_hypernym	01631534
01046932	_derivationally_related_form	07121361
13367070	_derivationally_related_form	02281093
00431826	_derivationally_related_form	13470491
05461816	_hypernym	05237227
05578442	_derivationally_related_form	02713097
13504173	_synset_domain_topic_of	06128570
05704096	_derivationally_related_form	02170427
00773402	_derivationally_related_form	02567519
02589013	_hypernym	00878636
02171039	_derivationally_related_form	10165448
06694540	_hypernym	06693198
01085098	_derivationally_related_form	02294179
14412882	_derivationally_related_form	01194238
04016240	_hypernym	04016576
07160296	_hypernym	07160116
09184975	_derivationally_related_form	01646866
01506157	_derivationally_related_form	00798245
02554647	_derivationally_related_form	07252378
00237078	_derivationally_related_form	00404642
00900070	_hypernym	00899927
14315192	_hypernym	14299637
00916909	_derivationally_related_form	06782680
01309143	_derivationally_related_form	14286549
02244956	_derivationally_related_form	10474446
02122164	_derivationally_related_form	14331873
00583990	_also_see	02291843
05829782	_derivationally_related_form	01190948
01156112	_derivationally_related_form	04910973
01808626	_hypernym	01808769
08107499	_member_meronym	01333301
00451461	_derivationally_related_form	07942152
10555679	_hypernym	09781504
00562398	_derivationally_related_form	01476483
02448185	_derivationally_related_form	08008335
00123170	_derivationally_related_form	02504131
02338975	_hypernym	02327200
00411020	_hypernym	00109660
05216365	_synset_domain_topic_of	02472293
02507736	_derivationally_related_form	05830059
03247620	_hypernym	14778436
03302121	_derivationally_related_form	01310660
10577284	_derivationally_related_form	02244956
05436752	_hypernym	08459252
00040152	_derivationally_related_form	02257370
02853218	_hypernym	03839993
00887463	_verb_group	02343595
05634219	_derivationally_related_form	01635056
01783158	_derivationally_related_form	05946687
00644839	_derivationally_related_form	00683280
05564590	_has_part	05566504
00923995	_derivationally_related_form	01658188
05289861	_has_part	05459769
05578095	_hypernym	05585665
01878466	_also_see	00631391
01899262	_hypernym	01871979
02530861	_derivationally_related_form	07544647
04946553	_hypernym	04916342
00925873	_verb_group	00402130
10205985	_hypernym	09610660
06806469	_derivationally_related_form	02806907
05311054	_has_part	05320362
02698944	_derivationally_related_form	05217859
10549510	_hypernym	10522759
09476521	_derivationally_related_form	00290740
04202417	_derivationally_related_form	02325968
01871979	_derivationally_related_form	02766534
02260362	_derivationally_related_form	10309896
01870889	_also_see	01865197
00071178	_derivationally_related_form	14324274
06782680	_derivationally_related_form	00927049
00672433	_derivationally_related_form	10150794
08110373	_member_meronym	08101410
08550076	_hypernym	08651247
00157081	_hypernym	00042311
00560893	_hypernym	00126264
02406916	_derivationally_related_form	04836683
02385634	_derivationally_related_form	00586262
02408965	_derivationally_related_form	00044150
00282050	_derivationally_related_form	01995549
07211752	_hypernym	07208708
00637259	_derivationally_related_form	09887034
10789963	_derivationally_related_form	01256600
00660571	_derivationally_related_form	08459252
01181475	_hypernym	01080366
01822936	_hypernym	01821996
00967625	_hypernym	00954608
04616059	_hypernym	00024264
07201804	_derivationally_related_form	00989084
00261029	_derivationally_related_form	00205885
04827652	_hypernym	04850589
05786372	_derivationally_related_form	00739340
05570839	_hypernym	05289297
01865197	_also_see	01001689
02166460	_derivationally_related_form	05784831
00199707	_derivationally_related_form	01667132
05284851	_hypernym	05269901
00137313	_hypernym	00126264
00939035	_derivationally_related_form	06765044
00185104	_hypernym	00044673
05978623	_derivationally_related_form	01629958
00696189	_hypernym	00644583
05297523	_has_part	05493303
01560731	_derivationally_related_form	04016240
05480794	_hypernym	05237227
13961642	_hypernym	13954253
02610628	_derivationally_related_form	00210797
01369663	_derivationally_related_form	04850117
00713167	_derivationally_related_form	13792579
01212519	_derivationally_related_form	00895304
06782680	_derivationally_related_form	00916909
07285403	_derivationally_related_form	00121046
09769636	_hypernym	00007846
01666327	_derivationally_related_form	10584318
04662951	_derivationally_related_form	01194483
05827253	_derivationally_related_form	01759326
05736149	_derivationally_related_form	00660971
00710005	_derivationally_related_form	01008801
08053576	_hypernym	08008335
10756433	_derivationally_related_form	01635432
15145171	_derivationally_related_form	00248026
09608709	_hypernym	10138767
02439501	_hypernym	02436349
01211019	_hypernym	01207609
00907930	_derivationally_related_form	07211752
00972621	_hypernym	00955060
02548710	_derivationally_related_form	10671898
00205046	_hypernym	00146138
01012360	_derivationally_related_form	01089878
00064095	_derivationally_related_form	00354884
01813884	_hypernym	01771535
00648977	_derivationally_related_form	05837957
02603540	_derivationally_related_form	05529286
02730135	_verb_group	02635659
07246036	_hypernym	07245125
03746574	_derivationally_related_form	02749778
09798534	_derivationally_related_form	00896141
01310660	_hypernym	00173338
02607909	_derivationally_related_form	14007546
05704096	_hypernym	05702726
14412725	_hypernym	13932421
01350449	_also_see	01375637
00914632	_derivationally_related_form	01629000
02468793	_derivationally_related_form	13810323
02950154	_derivationally_related_form	01476483
01644050	_derivationally_related_form	00238527
06740919	_derivationally_related_form	01631830
05919866	_derivationally_related_form	00955148
02991302	_derivationally_related_form	02685299
09608002	_derivationally_related_form	02486932
00770437	_derivationally_related_form	01261974
09798534	_hypernym	09774783
00211110	_hypernym	00209943
01977155	_derivationally_related_form	05677952
02102484	_also_see	02103481
00608502	_hypernym	00650353
09614684	_derivationally_related_form	01129876
00949134	_hypernym	00947128
05760202	_derivationally_related_form	00611256
01871979	_derivationally_related_form	11458624
01028748	_derivationally_related_form	07230502
10720453	_derivationally_related_form	02260362
05760202	_derivationally_related_form	00611802
00209943	_derivationally_related_form	00715074
00105333	_derivationally_related_form	01253060
06613056	_derivationally_related_form	01024190
05485314	_hypernym	05329735
00657604	_hypernym	00658082
10776339	_hypernym	09631463
01612053	_also_see	02451113
00240184	_derivationally_related_form	01642437
13929852	_derivationally_related_form	02464693
14841267	_derivationally_related_form	00442267
01643657	_derivationally_related_form	00156390
00610010	_hypernym	00609683
02624263	_derivationally_related_form	00240184
01148283	_also_see	00999817
06511874	_derivationally_related_form	00699626
01069190	_verb_group	01069391
00868910	_derivationally_related_form	00926472
05492259	_hypernym	05225602
05540513	_has_part	05545212
05761918	_hypernym	05651399
02662297	_hypernym	02666239
01354673	_derivationally_related_form	13792692
01098869	_hypernym	00126264
07170753	_derivationally_related_form	00938247
05285623	_hypernym	05286536
13558696	_derivationally_related_form	02400378
02154508	_derivationally_related_form	10090498
05624700	_derivationally_related_form	00643250
00723056	_hypernym	00722232
01769902	_derivationally_related_form	01282014
01013434	_derivationally_related_form	02399331
05534333	_hypernym	05298729
02428924	_derivationally_related_form	01230965
01019372	_derivationally_related_form	00958334
05199869	_hypernym	05199286
01552519	_derivationally_related_form	09985279
02248465	_derivationally_related_form	10090498
02657219	_verb_group	02658283
09901143	_derivationally_related_form	01082454
00583990	_also_see	02519555
00004475	_derivationally_related_form	02614181
00054628	_derivationally_related_form	01323355
00950431	_derivationally_related_form	05785067
05500992	_has_part	05605192
00779601	_derivationally_related_form	10524973
06749881	_derivationally_related_form	00917772
10677713	_hypernym	09774783
05343542	_hypernym	05333777
05216365	_has_part	05462057
00090186	_derivationally_related_form	14285662
01211699	_derivationally_related_form	00140652
05813229	_derivationally_related_form	01775164
01835496	_also_see	01970826
09952163	_derivationally_related_form	01647867
00748282	_hypernym	00740577
01820302	_derivationally_related_form	01072072
01815185	_hypernym	01814815
02566528	_derivationally_related_form	02510446
02432530	_hypernym	02436349
00894738	_derivationally_related_form	01631830
02154508	_derivationally_related_form	00635205
01680756	_hypernym	01686132
04016240	_derivationally_related_form	01560731
05930736	_derivationally_related_form	02712243
01835496	_derivationally_related_form	00279835
07323922	_derivationally_related_form	01628449
01777817	_derivationally_related_form	09771435
01894758	_also_see	01898129
13812607	_derivationally_related_form	10235549
05462315	_has_part	05504532
10240082	_hypernym	00007846
01494310	_also_see	01463963
00713818	_hypernym	00713167
05318606	_synset_domain_topic_of	06057539
07423365	_derivationally_related_form	02626604
00021939	_hypernym	00003553
02684924	_hypernym	02367363
02372605	_hypernym	02367363
09178821	_hypernym	00023773
00958880	_also_see	02464693
01872645	_verb_group	01871979
13941337	_derivationally_related_form	02634265
01871979	_hypernym	01850315
01588493	_derivationally_related_form	07270179
05540513	_has_part	05541231
00634472	_derivationally_related_form	10510339
07975026	_derivationally_related_form	02428924
01621555	_derivationally_related_form	00908492
03563967	_derivationally_related_form	02408965
00880269	_derivationally_related_form	02163746
02294179	_derivationally_related_form	10401639
05808218	_derivationally_related_form	01637982
02734192	_derivationally_related_form	06075527
07042735	_hypernym	07050619
04618781	_derivationally_related_form	00007846
04620216	_has_part	04869569
00165178	_derivationally_related_form	02391803
00163779	_hypernym	00162632
05786184	_derivationally_related_form	00704388
02418872	_derivationally_related_form	05785508
05838176	_derivationally_related_form	00763399
00238527	_derivationally_related_form	01644522
05868477	_derivationally_related_form	00352826
00240131	_derivationally_related_form	00351638
07248801	_derivationally_related_form	00976653
02466134	_derivationally_related_form	10407726
02121511	_derivationally_related_form	10595647
05138488	_derivationally_related_form	00681429
01435380	_derivationally_related_form	03100490
04905188	_hypernym	04616059
07553964	_derivationally_related_form	01821996
01835496	_derivationally_related_form	00283127
05442131	_has_part	05444324
00981083	_derivationally_related_form	06732013
01872645	_derivationally_related_form	00112312
02387486	_derivationally_related_form	00883297
06367373	_hypernym	06364329
02661252	_derivationally_related_form	11415084
00570590	_derivationally_related_form	05675130
02553697	_verb_group	02387034
01126961	_derivationally_related_form	02853218
00368109	_derivationally_related_form	13583724
07048000	_hypernym	07037465
13961642	_derivationally_related_form	02614181
02242464	_derivationally_related_form	01115162
10461747	_derivationally_related_form	00701040
02354287	_synset_domain_topic_of	00607775
00101779	_derivationally_related_form	10776339
02274299	_derivationally_related_form	00789534
00898518	_hypernym	00407535
10369528	_derivationally_related_form	00939035
05818741	_derivationally_related_form	02169352
05568767	_hypernym	05474346
05993844	_hypernym	05989479
07527352	_derivationally_related_form	01813884
06732013	_derivationally_related_form	00981083
02244956	_derivationally_related_form	00079398
00773814	_hypernym	00766234
04630689	_derivationally_related_form	00859325
00739662	_derivationally_related_form	07974025
00905677	_derivationally_related_form	06552639
00588221	_derivationally_related_form	05806623
05908520	_derivationally_related_form	00707956
01824244	_also_see	01825671
08550076	_derivationally_related_form	02143539
00017222	_hypernym	00004475
01238424	_derivationally_related_form	00367685
00991838	_derivationally_related_form	04999741
01621555	_derivationally_related_form	08060446
05563770	_has_part	05593017
04660536	_hypernym	04616059
07212424	_hypernym	07212190
01149494	_also_see	01364008
07514345	_derivationally_related_form	02116118
00199309	_derivationally_related_form	05849284
01796800	_hypernym	01796519
10509161	_derivationally_related_form	13955461
00744758	_derivationally_related_form	00748282
05549830	_has_part	05555688
10150794	_hypernym	00007846
01096454	_derivationally_related_form	00908621
06346681	_hypernym	06346461
14445379	_derivationally_related_form	00082308
09882007	_hypernym	09882716
02255462	_hypernym	02199590
00955060	_hypernym	00407535
00432683	_derivationally_related_form	05111835
00056334	_derivationally_related_form	00849982
00903385	_derivationally_related_form	10399299
01635176	_derivationally_related_form	06367107
07534430	_derivationally_related_form	01797347
09469285	_hypernym	09190918
00908351	_derivationally_related_form	04922113
00770437	_derivationally_related_form	00322457
15140405	_has_part	15144371
07963987	_hypernym	07963711
00896141	_derivationally_related_form	09798534
06013741	_synset_domain_topic_of	06000644
01834304	_also_see	00013160
08107499	_synset_domain_topic_of	06037666
00559102	_derivationally_related_form	11452218
01620854	_derivationally_related_form	06398401
06037666	_derivationally_related_form	02665803
00699815	_derivationally_related_form	05838176
02842445	_derivationally_related_form	06171040
01206553	_hypernym	01206153
01968569	_derivationally_related_form	07370671
01478002	_derivationally_related_form	02796412
05600637	_has_part	05599617
05805475	_hypernym	05804793
05755883	_hypernym	05752544
02346895	_hypernym	00674607
00359238	_hypernym	00358931
02555434	_derivationally_related_form	09608709
01092366	_derivationally_related_form	00964343
14000403	_derivationally_related_form	02541509
09771435	_hypernym	09622302
00690614	_derivationally_related_form	05945642
02210855	_derivationally_related_form	09764201
01002956	_hypernym	00996969
07151892	_hypernym	07151380
00428270	_hypernym	00426928
09777353	_hypernym	10522035
02145543	_verb_group	01478002
02166460	_derivationally_related_form	05822746
14324274	_hypernym	14322699
02504562	_hypernym	02506546
00040962	_derivationally_related_form	13928668
02170427	_derivationally_related_form	05650579
05254197	_hypernym	05220461
01882170	_derivationally_related_form	00284798
00633443	_derivationally_related_form	10634316
02556817	_derivationally_related_form	01215168
01095218	_hypernym	02410855
03129123	_derivationally_related_form	01753788
01668603	_verb_group	01659248
00165942	_derivationally_related_form	00014549
05693919	_derivationally_related_form	02556126
00692329	_derivationally_related_form	05854150
04999741	_hypernym	04999401
05734559	_derivationally_related_form	00726300
13760316	_hypernym	13576355
00116619	_derivationally_related_form	06367373
00637259	_derivationally_related_form	06013741
01835496	_derivationally_related_form	04773596
01213886	_derivationally_related_form	02217695
01071411	_derivationally_related_form	01507134
00876332	_hypernym	00872886
00022686	_derivationally_related_form	05035961
01118449	_derivationally_related_form	00964569
00035189	_hypernym	00037396
00055142	_synset_domain_topic_of	06037666
00815686	_hypernym	01009240
13969700	_derivationally_related_form	01765392
04677514	_derivationally_related_form	02138659
09424489	_derivationally_related_form	01183573
05675130	_derivationally_related_form	00570590
04876985	_derivationally_related_form	00958880
10434725	_derivationally_related_form	01641914
05559256	_derivationally_related_form	00131426
00096343	_derivationally_related_form	02550868
05216365	_synset_domain_topic_of	00015388
01649999	_verb_group	01771390
00670261	_derivationally_related_form	10066732
08164585	_derivationally_related_form	00710005
01127623	_derivationally_related_form	00748282
10592397	_derivationally_related_form	02326355
05142641	_derivationally_related_form	02290956
03385117	_hypernym	05075602
04850589	_derivationally_related_form	01549291
05111835	_derivationally_related_form	00432683
01896478	_derivationally_related_form	01759326
02610628	_hypernym	02609764
03721797	_hypernym	00021939
00603298	_verb_group	00171852
00084230	_derivationally_related_form	03740161
01643657	_derivationally_related_form	13773539
02169352	_derivationally_related_form	05818741
05748285	_derivationally_related_form	00650353
02349212	_hypernym	02230772
00918872	_derivationally_related_form	00162632
02248465	_derivationally_related_form	00043195
02128653	_derivationally_related_form	10633450
01816431	_derivationally_related_form	01072780
02106006	_hypernym	02106506
01567275	_hypernym	01494310
05601198	_derivationally_related_form	02877704
01494310	_also_see	01363648
05563266	_derivationally_related_form	01906322
06549661	_derivationally_related_form	00802946
00894738	_derivationally_related_form	09798534
00278810	_derivationally_related_form	01201089
02872333	_hypernym	04099175
07290905	_hypernym	07283608
00149262	_derivationally_related_form	01344293
01012073	_hypernym	01011725
01462005	_derivationally_related_form	07963987
00900581	_derivationally_related_form	00836236
01619725	_hypernym	01621555
01724459	_hypernym	01619354
01882170	_derivationally_related_form	04544979
10510339	_derivationally_related_form	00772189
07532440	_hypernym	00026192
10665698	_derivationally_related_form	02387486
10296832	_hypernym	10752093
00681429	_derivationally_related_form	09802050
00494907	_derivationally_related_form	00742320
01319874	_derivationally_related_form	13989863
00887463	_derivationally_related_form	10077593
01494310	_also_see	01981036
02055062	_also_see	01781478
07963987	_derivationally_related_form	01462005
06528783	_hypernym	06472025
00171852	_derivationally_related_form	00948206
01627947	_verb_group	00545557
13988663	_derivationally_related_form	01149494
00442267	_derivationally_related_form	13572436
02942769	_derivationally_related_form	13489037
02247977	_derivationally_related_form	00045907
00013160	_also_see	01834304
02286204	_verb_group	01313923
01435380	_hypernym	01850315
02550296	_hypernym	01429349
01548718	_derivationally_related_form	06389230
02553697	_hypernym	00253761
07452348	_hypernym	07450842
13970764	_derivationally_related_form	00294884
01058574	_derivationally_related_form	06762711
05562249	_has_part	05573895
03779370	_derivationally_related_form	01662771
01744611	_verb_group	01698271
01321002	_derivationally_related_form	00359614
02511551	_hypernym	00697589
01904930	_hypernym	01835496
02656763	_derivationally_related_form	03201208
13810323	_derivationally_related_form	02468793
00038849	_derivationally_related_form	07938773
11415084	_derivationally_related_form	02662297
05585665	_hypernym	05225602
01797347	_derivationally_related_form	07535670
00003553	_has_part	04164989
02387486	_derivationally_related_form	00611433
05344514	_hypernym	05333777
05309725	_hypernym	08660339
14007546	_hypernym	14006945
00772189	_derivationally_related_form	14379829
01015244	_synset_domain_topic_of	08441203
07214432	_derivationally_related_form	00598954
10524973	_hypernym	00007846
07199565	_hypernym	07160883
00345761	_derivationally_related_form	00235435
05761559	_hypernym	05760202
10150794	_derivationally_related_form	00631737
04806804	_hypernym	05142180
13773539	_hypernym	13773361
05190804	_hypernym	04723816
10724699	_derivationally_related_form	02220461
00230276	_derivationally_related_form	03377582
00455348	_hypernym	00407535
00940709	_derivationally_related_form	01632411
00199309	_derivationally_related_form	06762380
01113867	_derivationally_related_form	02260770
00634472	_derivationally_related_form	14379829
00631737	_derivationally_related_form	10150794
01198101	_hypernym	01156834
00196485	_hypernym	00191142
02123812	_also_see	02495922
02618149	_verb_group	02614181
00730052	_hypernym	00713167
00081725	_derivationally_related_form	10707233
01292885	_derivationally_related_form	03728811
02161432	_also_see	01275562
05753564	_derivationally_related_form	00603298
09802239	_derivationally_related_form	00681429
10524223	_derivationally_related_form	00694068
01226240	_also_see	01222360
01284461	_derivationally_related_form	10737431
05237227	_hypernym	05220461
03932203	_derivationally_related_form	01590171
05311054	_has_part	05314639
05651680	_derivationally_related_form	00772189
05269901	_has_part	05285623
00664110	_hypernym	00661091
05199869	_derivationally_related_form	00838856
07208708	_derivationally_related_form	00907147
01016832	_derivationally_related_form	00654625
05544575	_hypernym	05542893
10670668	_derivationally_related_form	02453889
01129977	_also_see	01123148
10090020	_hypernym	09609232
01492052	_derivationally_related_form	14419164
01020005	_derivationally_related_form	10309347
13489037	_derivationally_related_form	00252019
07138915	_derivationally_related_form	00689344
00905677	_derivationally_related_form	01249315
07355887	_derivationally_related_form	00441445
00015388	_has_part	05601198
01649999	_hypernym	01645601
09821253	_hypernym	09633969
06687178	_derivationally_related_form	00806502
02735897	_derivationally_related_form	01207609
00378985	_derivationally_related_form	00394813
00772967	_hypernym	01009240
00002684	_hypernym	00001930
10592595	_derivationally_related_form	02466134
10461424	_derivationally_related_form	01350449
10745894	_derivationally_related_form	00681429
06648724	_hypernym	06643408
01732172	_derivationally_related_form	10212780
14000403	_hypernym	00024720
01191838	_hypernym	01191645
00672017	_derivationally_related_form	06528992
02199590	_hypernym	02220461
03485997	_derivationally_related_form	01224001
01295275	_hypernym	01354673
10165448	_derivationally_related_form	02170427
09610660	_derivationally_related_form	01070102
01644050	_hypernym	01627355
05761918	_derivationally_related_form	00611481
06741305	_derivationally_related_form	00893741
00069879	_hypernym	00064643
05313822	_has_part	05314919
00912960	_derivationally_related_form	02157100
01372049	_also_see	01133876
00877127	_hypernym	00876874
02444662	_derivationally_related_form	01139194
07340249	_derivationally_related_form	00069879
00839619	_also_see	00510050
00169806	_derivationally_related_form	07296428
02343595	_derivationally_related_form	00205891
04792357	_hypernym	04792127
02107588	_derivationally_related_form	05776212
02551832	_derivationally_related_form	10553805
02766328	_derivationally_related_form	00070641
06686736	_derivationally_related_form	00882948
02551602	_derivationally_related_form	11083656
01058574	_derivationally_related_form	06765044
05216365	_has_part	05509889
00240184	_derivationally_related_form	01641914
01667132	_hypernym	00126264
09623038	_derivationally_related_form	02440244
02179279	_also_see	02460502
05552607	_hypernym	05220461
00632627	_derivationally_related_form	10510339
00352826	_derivationally_related_form	15266911
08402442	_hypernym	08008335
01974062	_derivationally_related_form	07370671
15265518	_derivationally_related_form	02608347
04485226	_derivationally_related_form	01643657
15109745	_hypernym	00020827
05703429	_derivationally_related_form	02118933
04852750	_hypernym	04852088
04626280	_hypernym	04616059
01090335	_derivationally_related_form	03335030
10773394	_derivationally_related_form	01974062
00224901	_derivationally_related_form	00362355
01865197	_also_see	02331262
01222360	_also_see	01226240
02210855	_verb_group	00522751
01336635	_verb_group	01332730
00637259	_derivationally_related_form	00868910
02887970	_hypernym	03597469
00851239	_derivationally_related_form	01261490
00931040	_derivationally_related_form	00116619
01089778	_hypernym	01086081
04007664	_hypernym	03183080
00064889	_hypernym	00126264
00917772	_derivationally_related_form	07286905
07553964	_derivationally_related_form	01822248
02612762	_hypernym	02655135
02577061	_also_see	01180695
04683453	_derivationally_related_form	00212173
00164345	_hypernym	01083077
00895304	_derivationally_related_form	09614684
07487695	_derivationally_related_form	01762283
00284798	_derivationally_related_form	01882170
02106506	_derivationally_related_form	09626589
10251779	_derivationally_related_form	00602255
01340439	_derivationally_related_form	00147595
10729175	_hypernym	10225219
08419163	_hypernym	08420278
01207951	_verb_group	01332730
00644967	_derivationally_related_form	02400378
15267536	_derivationally_related_form	02426395
00926472	_hypernym	00917772
13962166	_derivationally_related_form	02618149
01647229	_derivationally_related_form	10107303
01016832	_hypernym	01012360
02128286	_hypernym	02150510
05112609	_derivationally_related_form	02335828
00583239	_also_see	00958880
01769843	_derivationally_related_form	02586121
01732172	_hypernym	01712704
00941974	_derivationally_related_form	01310660
08058098	_hypernym	08053576
09465459	_derivationally_related_form	01385458
00489837	_derivationally_related_form	03735637
02530861	_also_see	01074650
05999266	_hypernym	05809192
00123170	_derivationally_related_form	05840650
01627355	_hypernym	01617192
02504131	_derivationally_related_form	04735233
05511286	_hypernym	05237227
00657260	_derivationally_related_form	01012712
00198451	_hypernym	00191142
00940842	_derivationally_related_form	01633343
00844254	_hypernym	13440063
01723690	_synset_domain_topic_of	06157326
03735637	_hypernym	03733925
05305136	_has_part	05240850
05229622	_hypernym	00006484
00242808	_hypernym	00199130
00776523	_hypernym	00766418
01309143	_derivationally_related_form	04693900
01432474	_derivationally_related_form	05302499
05784831	_derivationally_related_form	00813044
01198779	_derivationally_related_form	03571155
00971650	_derivationally_related_form	00874067
01989873	_hypernym	01970826
00387657	_hypernym	00383390
06757891	_hypernym	06756407
00773402	_hypernym	00774107
08406486	_derivationally_related_form	02427103
00781000	_derivationally_related_form	05051896
08624656	_hypernym	08621598
01662771	_derivationally_related_form	03779370
13085864	_derivationally_related_form	01321002
10631941	_derivationally_related_form	00583461
00634906	_hypernym	00588888
00766418	_derivationally_related_form	10418841
00345761	_derivationally_related_form	15265518
10578762	_derivationally_related_form	01435380
00003316	_derivationally_related_form	00836788
02166460	_verb_group	00813044
05273822	_has_part	05546383
01136519	_derivationally_related_form	01651444
00082081	_derivationally_related_form	00654885
00906367	_hypernym	00971650
13969243	_derivationally_related_form	00483181
08103457	_synset_domain_topic_of	06037666
05501485	_hypernym	08434259
01123598	_hypernym	01080366
05544906	_hypernym	05542893
02106006	_derivationally_related_form	02103481
07417043	_derivationally_related_form	00485609
06633692	_hypernym	06628861
01645601	_derivationally_related_form	00322457
10633450	_derivationally_related_form	02128653
10423589	_synset_domain_topic_of	06158346
02486932	_derivationally_related_form	07467846
00071178	_derivationally_related_form	10716005
02563860	_derivationally_related_form	03017922
00190115	_also_see	00570590
09877587	_hypernym	10633450
02869563	_hypernym	04576211
00482473	_derivationally_related_form	00185104
10225219	_derivationally_related_form	00698855
00061290	_derivationally_related_form	01950798
00210518	_derivationally_related_form	00484166
00196485	_derivationally_related_form	02257767
01107932	_hypernym	01106808
08189659	_derivationally_related_form	00368109
01224001	_derivationally_related_form	03485997
01835496	_derivationally_related_form	09629752
10583916	_hypernym	10351874
01974062	_derivationally_related_form	03281145
01323355	_hypernym	01321230
02154508	_derivationally_related_form	00043195
08008335	_derivationally_related_form	01651444
07414740	_hypernym	07283608
05367912	_hypernym	05418717
00835294	_hypernym	00834259
05503705	_hypernym	05264756
01275562	_also_see	02161432
00820976	_derivationally_related_form	06880249
04203705	_has_part	03211789
01640207	_derivationally_related_form	00643250
00283568	_hypernym	00283127
00483181	_derivationally_related_form	13969243
00895304	_derivationally_related_form	01212519
00933566	_hypernym	00126264
02327200	_derivationally_related_form	01057200
00834198	_also_see	02495922
00924825	_derivationally_related_form	01653442
00611481	_derivationally_related_form	07452841
04231693	_hypernym	03100490
00240184	_derivationally_related_form	02348568
00770270	_derivationally_related_form	02566528
01226240	_also_see	01369663
10165448	_derivationally_related_form	02169891
01139194	_derivationally_related_form	02444662
00773402	_derivationally_related_form	01120069
00607775	_hypernym	00606370
00892467	_derivationally_related_form	06628861
01070102	_derivationally_related_form	09610660
03384535	_derivationally_related_form	01659248
00905399	_derivationally_related_form	10399299
01121690	_derivationally_related_form	02284951
05496990	_has_part	05229990
04451473	_hypernym	03740161
00123170	_derivationally_related_form	00191142
01771535	_also_see	01821996
04877421	_derivationally_related_form	00887463
00376400	_derivationally_related_form	01298931
01762528	_derivationally_related_form	01260867
01789514	_derivationally_related_form	00419644
02556817	_derivationally_related_form	10670668
01309143	_hypernym	01555742
14757848	_derivationally_related_form	05277728
13971561	_derivationally_related_form	01765392
00006484	_has_part	05445668
00726300	_derivationally_related_form	05734559
00874067	_derivationally_related_form	00670261
02285629	_derivationally_related_form	10090498
13911151	_derivationally_related_form	02660147
01820901	_derivationally_related_form	01221790
00240184	_derivationally_related_form	01753788
01228877	_derivationally_related_form	00694068
06333653	_derivationally_related_form	01024190
03728811	_derivationally_related_form	02657219
01090335	_derivationally_related_form	01170962
02379528	_derivationally_related_form	07325190
01806505	_derivationally_related_form	04687333
10425946	_derivationally_related_form	06158346
10421956	_derivationally_related_form	01089483
01241767	_derivationally_related_form	00894738
13954253	_derivationally_related_form	02603699
05289057	_hypernym	05267548
02219094	_derivationally_related_form	13365286
01494310	_also_see	02642814
05600637	_has_part	05367341
01828736	_derivationally_related_form	01072072
02323286	_derivationally_related_form	04321534
00422551	_derivationally_related_form	00071178
01668603	_derivationally_related_form	01023820
02796623	_hypernym	03839993
01221790	_derivationally_related_form	01787955
04841358	_derivationally_related_form	00638981
02469274	_derivationally_related_form	00377169
04906273	_derivationally_related_form	01612053
02542795	_derivationally_related_form	04906273
05544725	_hypernym	05542893
10716005	_derivationally_related_form	00071178
07286368	_derivationally_related_form	00871942
02578510	_derivationally_related_form	00516086
00612160	_derivationally_related_form	02760116
05591256	_hypernym	05289861
03533486	_derivationally_related_form	01656788
05540513	_has_part	05541872
13987423	_derivationally_related_form	01148283
00484166	_derivationally_related_form	09930257
07480068	_hypernym	00026192
02448185	_derivationally_related_form	00237078
00113113	_derivationally_related_form	01447257
05301072	_hypernym	05301392
01516071	_derivationally_related_form	02872333
06372095	_derivationally_related_form	10075529
07213395	_hypernym	07160883
02436349	_derivationally_related_form	01474513
07491038	_derivationally_related_form	01190948
05838176	_hypernym	05837957
01205827	_hypernym	01202904
11083656	_derivationally_related_form	00411009
00050693	_hypernym	00050195
01091905	_derivationally_related_form	02728784
01370590	_also_see	02037272
00661824	_derivationally_related_form	09912995
00739662	_derivationally_related_form	01013434
01904930	_derivationally_related_form	10412055
05576573	_derivationally_related_form	02034986
10412055	_hypernym	09629752
14422179	_derivationally_related_form	00205885
02127613	_derivationally_related_form	04946553
01647672	_verb_group	01629000
01552519	_derivationally_related_form	03154073
00212173	_derivationally_related_form	01900150
06551784	_hypernym	06479665
02274299	_hypernym	02207206
06252138	_derivationally_related_form	00742320
01656788	_hypernym	01617192
05502556	_hypernym	05303402
01557614	_derivationally_related_form	00007846
00556193	_derivationally_related_form	00380083
01247647	_derivationally_related_form	00904046
05808218	_derivationally_related_form	02154508
05601198	_hypernym	05225090
00096343	_hypernym	00093483
04546855	_has_part	02734217
01024190	_derivationally_related_form	06333653
02219940	_derivationally_related_form	10466198
01751545	_hypernym	01708676
10584318	_derivationally_related_form	01666327
01321002	_hypernym	00430370
02217695	_derivationally_related_form	13365698
07180570	_derivationally_related_form	01024190
05480794	_has_part	05491612
10045454	_derivationally_related_form	00611433
01096497	_derivationally_related_form	00586262
01725712	_derivationally_related_form	07480896
04733640	_derivationally_related_form	00344125
01309701	_derivationally_related_form	00941974
05256085	_hypernym	05254795
05658826	_synset_domain_topic_of	00015388
00570590	_also_see	00190115
01552519	_hypernym	01556921
13089631	_derivationally_related_form	01440801
01136519	_derivationally_related_form	02448185
01215168	_derivationally_related_form	02453889
02150948	_hypernym	02150510
01127215	_hypernym	01476483
05593654	_hypernym	05470189
14452294	_derivationally_related_form	01191838
01821996	_derivationally_related_form	04829550
01194938	_derivationally_related_form	04999401
00022686	_derivationally_related_form	14050143
00486018	_hypernym	00484166
07291312	_derivationally_related_form	01620854
01348530	_hypernym	01326291
00030358	_derivationally_related_form	01643657
01612053	_also_see	00696518
02210855	_derivationally_related_form	00077419
00607780	_derivationally_related_form	05833840
02413480	_verb_group	02410855
01193721	_derivationally_related_form	13580723
01111016	_also_see	02099019
00896497	_hypernym	01012073
01057759	_hypernym	01057200
05775407	_derivationally_related_form	00926702
05311054	_has_part	05426989
10240082	_derivationally_related_form	00594621
09179776	_hypernym	09178821
01613239	_hypernym	01494310
00763399	_derivationally_related_form	00162632
10369528	_derivationally_related_form	01020005
02154508	_hypernym	02163746
02554922	_hypernym	02556126
00972621	_derivationally_related_form	01119169
02131072	_derivationally_related_form	07487695
00211110	_derivationally_related_form	00484892
05474738	_hypernym	05474346
00655779	_also_see	00900616
01053207	_hypernym	01051331
13989863	_hypernym	13989627
00876874	_derivationally_related_form	02106506
00342980	_verb_group	00252019
10025730	_hypernym	09608709
05276860	_hypernym	05269901
09887034	_derivationally_related_form	00712135
14548343	_derivationally_related_form	00091968
02171039	_derivationally_related_form	00882159
00539546	_hypernym	01628449
09962966	_hypernym	10476086
05032565	_derivationally_related_form	00668099
00906367	_derivationally_related_form	01189282
05237755	_hypernym	09257949
02308741	_derivationally_related_form	00787465
02608823	_verb_group	02608347
00484892	_derivationally_related_form	00211110
01629958	_derivationally_related_form	07160116
03180969	_derivationally_related_form	02106006
02219094	_hypernym	02199590
05194578	_derivationally_related_form	01350449
01120448	_hypernym	01090446
10670668	_derivationally_related_form	00806314
01759326	_hypernym	01617192
01086081	_derivationally_related_form	02199590
00598954	_derivationally_related_form	07214432
04734885	_derivationally_related_form	00583990
05804793	_hypernym	05770664
02609203	_verb_group	00348746
01654628	_derivationally_related_form	10284064
04033995	_hypernym	02820210
01321002	_derivationally_related_form	04250026
01462468	_derivationally_related_form	00380083
08063446	_derivationally_related_form	02245993
13549672	_hypernym	13518963
05999797	_has_part	05993844
00905852	_derivationally_related_form	06741305
02286687	_derivationally_related_form	00043195
09801864	_derivationally_related_form	00588998
02293321	_hypernym	02230772
02766534	_hypernym	04576211
01447632	_derivationally_related_form	00112312
01447632	_hypernym	01871979
00272878	_derivationally_related_form	00192051
05827684	_hypernym	05816287
01721169	_derivationally_related_form	00050195
00996969	_hypernym	00407535
06762380	_derivationally_related_form	00199309
00672277	_derivationally_related_form	00874067
05445668	_hypernym	05297523
00339934	_derivationally_related_form	07314277
04713332	_hypernym	04712735
00926472	_derivationally_related_form	06749881
01156834	_derivationally_related_form	01867502
00829761	_derivationally_related_form	00238527
14419164	_derivationally_related_form	00713167
02170427	_derivationally_related_form	05704096
00827730	_hypernym	00765649
01828736	_derivationally_related_form	10058411
01241331	_hypernym	01247647
07423001	_hypernym	07355887
04761212	_hypernym	04760771
00713167	_derivationally_related_form	00031921
03122748	_derivationally_related_form	01332730
05455912	_hypernym	05430628
07495327	_derivationally_related_form	00065070
00603298	_verb_group	00602805
14006945	_derivationally_related_form	00043411
09633969	_hypernym	09831962
02129289	_verb_group	02150948
10466198	_derivationally_related_form	02219940
06528992	_derivationally_related_form	00672017
02154508	_derivationally_related_form	07214432
07521674	_derivationally_related_form	01782432
07314277	_hypernym	07300960
00429968	_hypernym	00441445
01082454	_derivationally_related_form	09901143
02428487	_verb_group	00495998
01074650	_also_see	01246579
00651991	_hypernym	00956687
00055142	_hypernym	01617192
06748969	_hypernym	06722453
00503164	_derivationally_related_form	05827684
00360650	_also_see	01904845
00151689	_derivationally_related_form	13458571
01127245	_derivationally_related_form	02504562
02656763	_derivationally_related_form	07565259
00156390	_derivationally_related_form	00539546
02389346	_derivationally_related_form	00145218
01123148	_also_see	00227507
02298160	_derivationally_related_form	10577284
00140123	_hypernym	00109660
00672433	_derivationally_related_form	06528783
07150850	_synset_domain_topic_of	08441203
06260121	_derivationally_related_form	01435380
05540513	_has_part	05543917
01292885	_hypernym	01295275
13929852	_derivationally_related_form	02349212
01635056	_derivationally_related_form	05634219
00367685	_derivationally_related_form	07373602
00812580	_derivationally_related_form	07140978
05536370	_has_part	05537576
01590171	_derivationally_related_form	03932203
01310660	_derivationally_related_form	09304750
00069295	_derivationally_related_form	05327767
00927017	_derivationally_related_form	13954253
00380083	_derivationally_related_form	00394813
01259458	_also_see	01256600
05616246	_derivationally_related_form	00001740
00638981	_derivationally_related_form	04841358
00084562	_hypernym	00497705
03201208	_derivationally_related_form	02656763
07510625	_derivationally_related_form	00090186
00784533	_derivationally_related_form	00642098
10756433	_hypernym	09621545
01895630	_similar_to	01894758
02238085	_hypernym	02210855
01282014	_derivationally_related_form	01769902
07325190	_derivationally_related_form	02608347
05804274	_hypernym	05803379
05273822	_has_part	05233420
00883297	_has_part	00728849
05705184	_derivationally_related_form	10631941
01867502	_derivationally_related_form	01157517
04620216	_has_part	04669247
07526757	_hypernym	00026192
07939638	_hypernym	07938773
00633443	_derivationally_related_form	05952979
07138085	_hypernym	06252138
00651991	_derivationally_related_form	07366289
05385534	_hypernym	05298729
01912893	_derivationally_related_form	00284798
01215392	_derivationally_related_form	00806502
00607780	_derivationally_related_form	05761918
00055539	_derivationally_related_form	05171045
02635659	_verb_group	02730135
01604696	_derivationally_related_form	03600977
01120069	_derivationally_related_form	00773402
00056334	_derivationally_related_form	08101410
08164585	_hypernym	07965085
00004605	_derivationally_related_form	01253060
05329215	_has_part	05532795
07177924	_hypernym	06770275
00681429	_verb_group	00682230
05510702	_hypernym	05237227
02733187	_derivationally_related_form	05556943
05854150	_derivationally_related_form	00692329
02735897	_derivationally_related_form	05154908
09614684	_derivationally_related_form	00598215
07409592	_derivationally_related_form	01206218
00043765	_derivationally_related_form	13954818
02219094	_derivationally_related_form	01215902
07532440	_derivationally_related_form	00909363
01023259	_derivationally_related_form	06613056
01459422	_derivationally_related_form	01775164
11458624	_derivationally_related_form	01871979
07324380	_derivationally_related_form	01627355
00904046	_derivationally_related_form	00923321
01463965	_also_see	02533313
00069879	_derivationally_related_form	07313636
02551144	_hypernym	02551832
05535484	_has_part	05537806
05578442	_derivationally_related_form	02713218
09979589	_derivationally_related_form	00826509
00596644	_derivationally_related_form	05984584
01321002	_derivationally_related_form	00360143
00961329	_derivationally_related_form	06762711
10428004	_hypernym	10560637
01834304	_also_see	02123812
00672433	_derivationally_related_form	06783598
02735418	_derivationally_related_form	06398401
05339357	_hypernym	05333777
00806502	_derivationally_related_form	01215392
02608347	_derivationally_related_form	07325190
02547586	_derivationally_related_form	05154908
04713428	_hypernym	04712735
01364008	_derivationally_related_form	13989051
01770802	_also_see	01761120
09848489	_hypernym	10677713
02374914	_also_see	01372049
02728784	_hypernym	02727883
00345761	_verb_group	01070777
10658304	_derivationally_related_form	04321534
01702514	_hypernym	01698271
00394610	_hypernym	00391599
05217168	_derivationally_related_form	02897524
10264219	_hypernym	00007846
06528992	_hypernym	06528783
05473104	_hypernym	05470189
00740053	_derivationally_related_form	05734559
05395548	_derivationally_related_form	04519536
01313923	_verb_group	02286204
02170427	_derivationally_related_form	10165448
02107248	_derivationally_related_form	05299178
01093172	_hypernym	01090335
02232190	_derivationally_related_form	00315986
05496990	_has_part	05228020
05849040	_hypernym	05835747
02464693	_also_see	01996377
01165692	_hypernym	01146576
10483530	_derivationally_related_form	01881696
00959731	_also_see	00583990
00235435	_derivationally_related_form	02379528
02294179	_derivationally_related_form	01084637
00933821	_derivationally_related_form	07214432
01432353	_derivationally_related_form	05301072
06333653	_derivationally_related_form	00652346
01127215	_derivationally_related_form	04096848
06782680	_derivationally_related_form	00631737
02567519	_hypernym	01120069
01222360	_also_see	00763901
00355252	_hypernym	00351638
04096848	_derivationally_related_form	01127215
05692419	_derivationally_related_form	00701040
05989479	_hypernym	05793000
02112891	_similar_to	02111684
10665698	_hypernym	10059162
06063588	_hypernym	06045562
02251743	_derivationally_related_form	13279262
00284798	_derivationally_related_form	01912893
06470073	_derivationally_related_form	00666510
05869857	_derivationally_related_form	00368109
10351281	_hypernym	10284064
00484166	_derivationally_related_form	00211110
00739082	_derivationally_related_form	05770926
05485554	_has_part	05340795
00760956	_derivationally_related_form	09624559
02578510	_derivationally_related_form	07450651
05332225	_hypernym	05269901
01698271	_derivationally_related_form	03906997
01440801	_derivationally_related_form	13089631
00886978	_derivationally_related_form	01041111
00826509	_derivationally_related_form	09979321
02408965	_hypernym	01158872
00079018	_derivationally_related_form	02207206
00933821	_derivationally_related_form	07213395
09633969	_derivationally_related_form	02566528
02291843	_also_see	00583990
09190918	_derivationally_related_form	14007546
01178565	_derivationally_related_form	01057759
01182709	_hypernym	02199590
01478002	_derivationally_related_form	02982790
05433496	_hypernym	05225602
08550076	_derivationally_related_form	01311103
01775535	_derivationally_related_form	07543288
00958880	_also_see	02460502
05790242	_derivationally_related_form	00676450
03247620	_derivationally_related_form	10421470
08081403	_synset_domain_topic_of	00523513
07452348	_derivationally_related_form	00887463
09629752	_derivationally_related_form	01835496
05946687	_hypernym	05941423
05168261	_derivationally_related_form	00655779
00663353	_verb_group	00662589
05773923	_hypernym	05772356
10626867	_derivationally_related_form	00654625
00261029	_hypernym	00248977
00592883	_derivationally_related_form	06628861
02301502	_hypernym	02251743
04080833	_hypernym	02895606
02308741	_derivationally_related_form	01089778
13575869	_hypernym	00033615
07291312	_derivationally_related_form	00351963
02495922	_derivationally_related_form	05148699
06000644	_hypernym	05999797
05481095	_has_part	05495981
03699975	_derivationally_related_form	10279018
05540121	_has_part	05540513
00625393	_derivationally_related_form	04762355
05372428	_hypernym	05418717
01751545	_derivationally_related_form	05578095
10261041	_derivationally_related_form	13961642
01792567	_derivationally_related_form	14322699
10138767	_hypernym	00007846
00661824	_derivationally_related_form	00141806
00094001	_derivationally_related_form	02551602
05320899	_has_part	05318831
02432530	_derivationally_related_form	01008378
07291794	_hypernym	07291312
05789432	_hypernym	05788149
05552607	_has_part	05551711
02635659	_derivationally_related_form	11410625
07357388	_hypernym	07359599
13244109	_hypernym	00032613
09824361	_hypernym	09617867
07150850	_derivationally_related_form	00760956
01118449	_hypernym	02367363
08419562	_hypernym	08420278
00961329	_hypernym	00938247
10794014	_derivationally_related_form	00929718
07535670	_derivationally_related_form	00911562
07452841	_hypernym	07450842
00031921	_derivationally_related_form	00713167
00656576	_derivationally_related_form	00031264
02569130	_also_see	01898129
14451349	_derivationally_related_form	02504562
01310660	_derivationally_related_form	00941974
03740161	_derivationally_related_form	00084230
10717589	_derivationally_related_form	01206218
00918872	_derivationally_related_form	00151497
01364008	_also_see	01149494
05806623	_derivationally_related_form	00588221
00191142	_derivationally_related_form	00126264
01994442	_derivationally_related_form	00053913
02125223	_derivationally_related_form	05598147
03485997	_has_part	04184095
10160412	_hypernym	09624559
02533313	_also_see	01463965
13580415	_derivationally_related_form	02669789
00849788	_hypernym	00849332
00925873	_hypernym	00633443
01932973	_derivationally_related_form	02603699
10256537	_derivationally_related_form	00834259
05474346	_has_part	05236152
01042531	_hypernym	00941990
05315095	_hypernym	05327134
00116376	_hypernym	00045250
07048000	_has_part	07050177
01970646	_synset_domain_topic_of	06095022
00558371	_derivationally_related_form	00282050
06547059	_synset_domain_topic_of	08441203
11567411	_hypernym	08108972
00684480	_also_see	00550282
00926702	_hypernym	00917772
02549847	_derivationally_related_form	09821831
14445379	_derivationally_related_form	00476819
00947128	_hypernym	00407535
00125841	_verb_group	00146138
02121511	_derivationally_related_form	14324274
00941990	_hypernym	00740577
07366289	_derivationally_related_form	00651991
10776339	_derivationally_related_form	00067274
01435380	_derivationally_related_form	00121366
09812338	_hypernym	09614315
00014549	_derivationally_related_form	14004317
09609871	_derivationally_related_form	00169806
02495922	_also_see	02123812
05549830	_has_part	05597594
01640207	_verb_group	01621555
01292885	_derivationally_related_form	07976936
03129123	_hypernym	00021939
00779601	_also_see	00779360
00100543	_derivationally_related_form	01686132
00689344	_derivationally_related_form	05945642
06766190	_hypernym	06765044
05297523	_hypernym	05220461
06613056	_derivationally_related_form	01023259
01754576	_hypernym	01698271
00739662	_derivationally_related_form	07997703
00688377	_derivationally_related_form	05943066
01705257	_hypernym	01698271
00692329	_hypernym	00690614
05549830	_has_part	05549061
01366718	_also_see	01363613
02051694	_hypernym	01835496
05540121	_has_part	05280998
00043195	_derivationally_related_form	02154508
00820976	_hypernym	01015244
01165692	_derivationally_related_form	02348568
00765649	_derivationally_related_form	07139700
01133876	_also_see	01800349
02446164	_derivationally_related_form	10631941
01698271	_verb_group	01744611
02230772	_also_see	02293321
00094240	_derivationally_related_form	00903711
00483146	_derivationally_related_form	01090446
05395690	_hypernym	05298729
01014066	_derivationally_related_form	01384439
07992450	_hypernym	07941170
00940412	_hypernym	00927261
00279835	_derivationally_related_form	01850315
[truncated: 5,940 more rows]
