# Supplementary material
Source: ML conference proceedings conference paper supplement (https://proceedings.neurips.cc/paper_files/paper/2021/hash/0fd600c953cde8121262e322ef09f70e-Abstract.html)
Supplement: Supplementary file 1 [file 0fd600c953cde8121262e322ef09f70e-Supplemental.zip › Supplementary_Material_Paper_8745/data/GraIL-BM_WN18RR_v4/train/valid.txt]

00041899	_derivationally_related_form	00094460
01995549	_derivationally_related_form	00282050
01812324	_derivationally_related_form	07528470
10658304	_derivationally_related_form	13367070
10631941	_derivationally_related_form	05705184
05305136	_hypernym	05300231
05549830	_has_part	05559256
01789514	_derivationally_related_form	07372565
07212424	_derivationally_related_form	01009240
01051331	_derivationally_related_form	01494310
10425946	_hypernym	00007846
11665372	_derivationally_related_form	02623529
00149262	_derivationally_related_form	01284908
00121046	_derivationally_related_form	07285403
00655779	_derivationally_related_form	05168261
00237078	_derivationally_related_form	01659248
01743217	_derivationally_related_form	01796800
00237078	_derivationally_related_form	02448185
00926472	_derivationally_related_form	00868910
01136519	_derivationally_related_form	00710005
05785508	_derivationally_related_form	00704388
07443761	_derivationally_related_form	02257767
10309347	_derivationally_related_form	01024190
10227985	_derivationally_related_form	08441203
02550296	_member_meronym	02550460
00593944	_derivationally_related_form	10225219
07528470	_hypernym	07528212
00802946	_derivationally_related_form	01762839
00368109	_derivationally_related_form	09465459
02730135	_verb_group	00136991
09906538	_hypernym	09614684
02348324	_derivationally_related_form	01165692
00948206	_derivationally_related_form	00171852
02877704	_derivationally_related_form	05600637
03894379	_hypernym	04341686
00611481	_derivationally_related_form	05761918
04623612	_hypernym	04623113
01119169	_derivationally_related_form	00972621
05593871	_hypernym	05585665
01346003	_derivationally_related_form	00338641
00668099	_derivationally_related_form	05032565
02513740	_similar_to	02515214
07497473	_hypernym	00026192
02260362	_derivationally_related_form	01113068
08109624	_synset_domain_topic_of	06037666
05325378	_hypernym	05249636
00681429	_derivationally_related_form	00996969
05785508	_derivationally_related_form	00630380
05564590	_has_part	05344514
00037457	_derivationally_related_form	13440063
01555742	_hypernym	01552519
00065070	_derivationally_related_form	07495327
00628491	_also_see	01634142
01323449	_derivationally_related_form	00831651
00965035	_hypernym	00831651
10637635	_hypernym	10693824
05547508	_has_part	05305136
00006484	_hypernym	00004258
01659248	_derivationally_related_form	03384535
01256417	_hypernym	00407535
04638175	_hypernym	04637923
03377582	_hypernym	04599396
05143690	_derivationally_related_form	00205885
05637558	_hypernym	05616246
01835496	_also_see	01989873
09985279	_derivationally_related_form	01552519
05318606	_hypernym	05426243
01824244	_also_see	00834198
01743217	_derivationally_related_form	01796582
01148283	_also_see	01363613
02451113	_also_see	00696518
05540121	_has_part	05546040
10438172	_derivationally_related_form	01651444
02744651	_derivationally_related_form	09379111
00831651	_derivationally_related_form	01323449
00532607	_hypernym	00126264
01284271	_derivationally_related_form	10737431
00001740	_derivationally_related_form	04250850
01531375	_derivationally_related_form	05117660
04827652	_derivationally_related_form	02037272
02495922	_also_see	00834198
06060845	_hypernym	06045562
07291794	_derivationally_related_form	02735418
00802318	_derivationally_related_form	01762839
00064643	_derivationally_related_form	07495327
00559102	_derivationally_related_form	14050143
05658826	_derivationally_related_form	02125223
01190948	_derivationally_related_form	07491708
02121511	_derivationally_related_form	14285662
02434238	_derivationally_related_form	10383505
00972621	_has_part	00974444
00881649	_hypernym	00877127
02219940	_derivationally_related_form	10407954
10077593	_derivationally_related_form	00887463
10438172	_derivationally_related_form	01632411
02034828	_also_see	01369663
00054628	_derivationally_related_form	10080869
00290740	_hypernym	00441445
05301908	_hypernym	05249636
05471629	_hypernym	05470189
01372049	_also_see	01507134
00282050	_derivationally_related_form	00558371
05337055	_hypernym	05333777
02704349	_derivationally_related_form	00996969
05549830	_has_part	05551318
05818741	_hypernym	05817396
01797051	_hypernym	01797347
00211110	_derivationally_related_form	02610628
02343056	_derivationally_related_form	09837824
10752093	_derivationally_related_form	02574205
00125841	_hypernym	00109660
07150644	_derivationally_related_form	00760956
10380305	_derivationally_related_form	05311054
00638981	_also_see	01372049
05545212	_hypernym	05249636
02372605	_derivationally_related_form	01023820
06693198	_hypernym	06686736
00999817	_also_see	01148283
01309991	_also_see	02179279
02618149	_derivationally_related_form	13962166
01637982	_derivationally_related_form	07214432
00822367	_hypernym	00670261
07251984	_derivationally_related_form	02397637
09476521	_derivationally_related_form	00224901
01074694	_derivationally_related_form	01478002
10706812	_synset_domain_topic_of	00933420
07490713	_hypernym	00026192
05388805	_has_part	05395098
01206153	_derivationally_related_form	00887463
00896803	_derivationally_related_form	05823054
00658082	_derivationally_related_form	00078760
00766418	_derivationally_related_form	01769843
10484526	_derivationally_related_form	00014549
04829550	_derivationally_related_form	01821996
01815185	_derivationally_related_form	00354884
00871942	_derivationally_related_form	06749881
00548802	_derivationally_related_form	01723690
07232421	_hypernym	07160883
05303402	_hypernym	05225602
07139700	_derivationally_related_form	00765649
05313822	_has_part	05315095
02163746	_derivationally_related_form	00881649
03018802	_derivationally_related_form	00654625
10280674	_derivationally_related_form	01629958
05755883	_derivationally_related_form	00607405
02310007	_derivationally_related_form	00089351
01010118	_derivationally_related_form	00686890
00358931	_hypernym	00351638
15267536	_derivationally_related_form	00351963
07467846	_derivationally_related_form	02486932
05984584	_derivationally_related_form	00596644
01113068	_derivationally_related_form	02727883
00484166	_derivationally_related_form	15267536
07974025	_derivationally_related_form	00654625
01015866	_derivationally_related_form	06613056
01629000	_verb_group	01647672
00799383	_verb_group	01994442
01659248	_hypernym	01653013
00976653	_derivationally_related_form	09773962
01253060	_hypernym	00044455
00637259	_derivationally_related_form	13742358
00803815	_derivationally_related_form	01215392
00588221	_derivationally_related_form	05806855
01835496	_also_see	00781000
05543177	_hypernym	05595083
07292694	_derivationally_related_form	02635659
07292694	_derivationally_related_form	02634265
01850315	_derivationally_related_form	00279835
00532892	_derivationally_related_form	00588221
09632518	_derivationally_related_form	02413480
00779360	_derivationally_related_form	10524973
05426989	_hypernym	05426243
01641632	_hypernym	01640855
01906322	_derivationally_related_form	10412055
01744611	_derivationally_related_form	10794014
05154908	_derivationally_related_form	02547586
05838765	_derivationally_related_form	00657260
07048000	_derivationally_related_form	10624310
01439190	_derivationally_related_form	00138956
02344060	_derivationally_related_form	13299651
10694258	_derivationally_related_form	00593732
02391803	_derivationally_related_form	10000787
09976429	_hypernym	00007846
02397637	_derivationally_related_form	07251984
00673766	_derivationally_related_form	05804491
00376400	_derivationally_related_form	01369758
00397953	_derivationally_related_form	02031158
05496990	_hypernym	05462674
00161243	_derivationally_related_form	00679389
01195867	_hypernym	01184814
01097292	_hypernym	00407535
13518963	_hypernym	00029677
00661091	_synset_domain_topic_of	06043075
04849759	_hypernym	04846770
09614684	_derivationally_related_form	00829378
02232190	_derivationally_related_form	00201671
13553916	_derivationally_related_form	00069295
02056880	_also_see	02577061
02895606	_hypernym	03183080
13085864	_derivationally_related_form	01320009
05854150	_derivationally_related_form	00734587
01295275	_derivationally_related_form	00145218
00084562	_derivationally_related_form	03740161
02343374	_hypernym	02245765
09774783	_derivationally_related_form	00827730
05537806	_has_part	05538016
05786372	_derivationally_related_form	00608808
00033020	_derivationally_related_form	01070102
00171852	_verb_group	00253761
01948573	_similar_to	01947266
01279631	_derivationally_related_form	13537894
14315192	_derivationally_related_form	00256507
01093587	_derivationally_related_form	09952163
07543288	_derivationally_related_form	01775164
14562960	_derivationally_related_form	00352826
01931768	_derivationally_related_form	08482271
00805034	_derivationally_related_form	02511551
01549291	_derivationally_related_form	04850589
01364162	_hypernym	01355326
15274074	_hypernym	15271008
00484892	_hypernym	00484166
01202904	_derivationally_related_form	02416278
00611433	_synset_domain_topic_of	00883297
01478002	_derivationally_related_form	01074694
02540670	_hypernym	02547586
01429349	_hypernym	08107499
01644746	_derivationally_related_form	00043765
07539367	_hypernym	07537485
05579944	_derivationally_related_form	01239494
10383816	_derivationally_related_form	01628449
01130169	_derivationally_related_form	09614684
06681551	_derivationally_related_form	00965035
01384439	_hypernym	02304982
03385117	_derivationally_related_form	01659248
05836275	_hypernym	05835747
01633343	_derivationally_related_form	10383816
13526110	_hypernym	00029677
01209953	_hypernym	01206218
01041111	_derivationally_related_form	02386012
00996969	_derivationally_related_form	00681429
05555917	_hypernym	05268965
00879356	_hypernym	00875394
02504562	_derivationally_related_form	05194578
02364448	_derivationally_related_form	01767949
00249780	_derivationally_related_form	02554922
02150510	_derivationally_related_form	10633450
05286536	_hypernym	05267548
00294884	_hypernym	00224901
05138208	_derivationally_related_form	02584981
00094240	_hypernym	00094001
00607405	_derivationally_related_form	10665698
01637982	_hypernym	01633343
02573275	_derivationally_related_form	09998101
05702275	_derivationally_related_form	02170427
05190804	_derivationally_related_form	01825671
01765392	_derivationally_related_form	00759551
01552519	_derivationally_related_form	00386915
10339504	_hypernym	10708454
13576982	_hypernym	00033615
05996646	_derivationally_related_form	00607405
02578235	_derivationally_related_form	00754118
10434725	_derivationally_related_form	01642437
02656763	_derivationally_related_form	09862345
04895246	_derivationally_related_form	02464693
00071178	_derivationally_related_form	00422551
01238424	_hypernym	01237415
00506299	_derivationally_related_form	04829550
02578510	_derivationally_related_form	07450842
06691442	_hypernym	06686736
06552639	_hypernym	06547059
00381680	_hypernym	00378985
06763681	_derivationally_related_form	01059123
06687358	_hypernym	06686736
05869584	_hypernym	05835747
02112891	_derivationally_related_form	13428159
01815628	_derivationally_related_form	07491038
06741305	_hypernym	06740644
06782680	_derivationally_related_form	00921072
04877421	_hypernym	04876985
06684383	_derivationally_related_form	00887463
00482473	_hypernym	00296178
02257370	_hypernym	02220461
00064643	_hypernym	00064889
13532886	_derivationally_related_form	00056930
05529286	_derivationally_related_form	02603540
07293180	_derivationally_related_form	02445509
03932203	_hypernym	03892891
00123170	_derivationally_related_form	13859043
10633450	_hypernym	09626589
02550516	_derivationally_related_form	00555138
00407535	_hypernym	00030358
00672017	_derivationally_related_form	05804274
10335246	_derivationally_related_form	00911350
01206218	_derivationally_related_form	00046522
10768585	_hypernym	00007846
07202579	_hypernym	07201365
05760202	_derivationally_related_form	00607780
00137313	_derivationally_related_form	00157957
00742320	_derivationally_related_form	06252138
00676450	_derivationally_related_form	10431625
09379111	_derivationally_related_form	02744651
02500884	_derivationally_related_form	05141222
02154508	_derivationally_related_form	05703429
07414922	_derivationally_related_form	02023107
14285662	_derivationally_related_form	02121511
00001740	_verb_group	00002573
05578442	_hypernym	05578251
00378985	_hypernym	00376063
02244956	_synset_domain_topic_of	01090446
04723816	_hypernym	00024264
02426395	_derivationally_related_form	00229260
01704953	_derivationally_related_form	06763273
01149138	_derivationally_related_form	10677713
01160031	_also_see	01711071
15144371	_hypernym	15113229
05916739	_derivationally_related_form	00721098
10677713	_derivationally_related_form	01827858
01190948	_derivationally_related_form	05829782
01792567	_derivationally_related_form	07496755
10279018	_derivationally_related_form	01624169
07290905	_derivationally_related_form	00348746
02395782	_derivationally_related_form	15265518
02550868	_derivationally_related_form	00096343
03017922	_derivationally_related_form	01640855
02440244	_derivationally_related_form	01256743
05311054	_has_part	05317960
10438172	_derivationally_related_form	00704690
00151689	_derivationally_related_form	13457378
06687178	_derivationally_related_form	00803815
05216365	_has_part	05546540
00991151	_derivationally_related_form	06479665
01494310	_derivationally_related_form	08623927
05869857	_derivationally_related_form	00367685
00069879	_derivationally_related_form	07340249
10301261	_hypernym	10560637
01072565	_derivationally_related_form	01183573
00446493	_derivationally_related_form	01090335
02103481	_derivationally_related_form	02106006
00142191	_derivationally_related_form	03385117
02471762	_hypernym	02469914
05926676	_hypernym	05809192
00442267	_derivationally_related_form	15055633
01646866	_verb_group	01629958
00252019	_hypernym	00230746
00353782	_hypernym	00351638
02169891	_derivationally_related_form	10165448
09609871	_hypernym	00007846
00442267	_hypernym	00140123
00364479	_derivationally_related_form	07537068
01040707	_derivationally_related_form	06721949
03673971	_derivationally_related_form	01354673
01544692	_also_see	01494310
02037272	_also_see	01370590
00612612	_derivationally_related_form	03055809
02428924	_hypernym	02376958
07495327	_hypernym	07494363
00925207	_hypernym	00924825
00411009	_derivationally_related_form	11083656
02684254	_verb_group	00908621
00921738	_derivationally_related_form	03721797
09887034	_derivationally_related_form	00637259
00763901	_also_see	01222360
00784533	_derivationally_related_form	02031158
02479323	_hypernym	02479990
13913566	_derivationally_related_form	01697027
00893955	_derivationally_related_form	00833702
00081572	_hypernym	00079018
01139194	_hypernym	01138670
02736778	_derivationally_related_form	13555446
01506157	_hypernym	01871979
00760956	_derivationally_related_form	09803429
01123148	_also_see	01129977
00933821	_hypernym	00952524
01649999	_derivationally_related_form	09179776
01686132	_hypernym	01619354
02555434	_derivationally_related_form	09815790
01231252	_derivationally_related_form	04007664
10510339	_derivationally_related_form	00634472
02247977	_verb_group	02285629
00594621	_derivationally_related_form	01374582
05462315	_hypernym	05237227
00607780	_derivationally_related_form	05786372
01026262	_derivationally_related_form	04659287
02219940	_hypernym	02219094
00235435	_derivationally_related_form	01075164
00989084	_hypernym	00987071
06549661	_derivationally_related_form	00802318
07544647	_derivationally_related_form	02530861
05283816	_hypernym	05269901
01311103	_derivationally_related_form	03996416
14004317	_hypernym	00024720
05269901	_has_part	05447599
10428004	_derivationally_related_form	06090869
00838856	_also_see	00834198
00654625	_derivationally_related_form	03018802
00830761	_derivationally_related_form	10630188
00947077	_derivationally_related_form	05692419
05593476	_hypernym	05593017
00161243	_derivationally_related_form	00676450
00159177	_derivationally_related_form	01644522
07245125	_derivationally_related_form	00766418
13457378	_derivationally_related_form	00431826
09901143	_synset_domain_topic_of	00471613
01816431	_derivationally_related_form	09424489
01127795	_derivationally_related_form	08081403
01028082	_hypernym	01027379
00043765	_derivationally_related_form	01644746
01932973	_also_see	00013160
00797697	_hypernym	00717358
00429968	_verb_group	00429060
03485997	_derivationally_related_form	01210737
10486349	_hypernym	09608709
00868910	_derivationally_related_form	00712135
00919513	_hypernym	00916464
07209965	_derivationally_related_form	00907657
01642924	_derivationally_related_form	00834198
02447793	_derivationally_related_form	06687358
02669081	_hypernym	02673965
09837824	_hypernym	10090020
02135389	_derivationally_related_form	00844254
04828925	_hypernym	04723816
05806623	_hypernym	05805475
09802050	_derivationally_related_form	00681429
09800249	_derivationally_related_form	00765213
01686132	_derivationally_related_form	04076846
06075527	_derivationally_related_form	10126424
01955127	_hypernym	01950798
07283608	_hypernym	00029378
02719399	_hypernym	02604760
01762528	_derivationally_related_form	05828102
10143725	_derivationally_related_form	02255462
08008335	_hypernym	07950920
01116026	_similar_to	01115349
00704388	_derivationally_related_form	05785885
05142180	_hypernym	04723816
00632627	_hypernym	00628491
07180570	_hypernym	07160883
01369758	_also_see	00643473
05839024	_derivationally_related_form	00654625
02251743	_derivationally_related_form	10409634
00362467	_derivationally_related_form	04630689
00026192	_derivationally_related_form	01771535
00190999	_derivationally_related_form	13426376
10365514	_derivationally_related_form	01231252
06650070	_hypernym	06634376
05310351	_hypernym	05470189
01666327	_hypernym	01658188
02154312	_derivationally_related_form	00151087
01740892	_also_see	01246579
00064095	_derivationally_related_form	00355547
00043195	_derivationally_related_form	02286687
05290756	_hypernym	05225602
01922763	_also_see	00087152
01209953	_derivationally_related_form	00140900
00923321	_also_see	01319874
01559055	_hypernym	01552519
02505141	_similar_to	02504131
00022686	_derivationally_related_form	01046984
00902424	_hypernym	00903385
05503705	_hypernym	05462674
02245993	_derivationally_related_form	08063446
01474513	_also_see	02451113
01632411	_derivationally_related_form	00923995
10634316	_hypernym	10708454
09784443	_derivationally_related_form	00064095
01494310	_hypernym	01850315
00112312	_derivationally_related_form	01872877
00351638	_hypernym	00351485
09930257	_synset_domain_topic_of	00471613
00732552	_derivationally_related_form	00879759
08436759	_derivationally_related_form	02598211
00760956	_derivationally_related_form	01240432
01110274	_derivationally_related_form	02728784
08434259	_derivationally_related_form	01032840
00989084	_derivationally_related_form	07201804
02550296	_derivationally_related_form	00654885
03879854	_hypernym	04074482
13367593	_derivationally_related_form	02479323
00719231	_hypernym	00717358
00050693	_derivationally_related_form	00528990
05442131	_has_part	05436752
06377442	_has_part	06384708
00006484	_has_part	05434927
01224001	_hypernym	01212572
14317720	_hypernym	14315192
05816287	_hypernym	00023271
01950798	_also_see	01955127
09622302	_hypernym	00007846
01084637	_derivationally_related_form	02294436
01213886	_derivationally_related_form	02556817
01753788	_derivationally_related_form	00237869
05405554	_has_part	05331812
07495327	_derivationally_related_form	00064643
01787955	_derivationally_related_form	05830059
01332730	_derivationally_related_form	02840619
00146138	_hypernym	00109660
07212190	_hypernym	07160883
07528470	_derivationally_related_form	01796346
00198451	_derivationally_related_form	02397637
10518349	_derivationally_related_form	01814815
00506299	_also_see	02374914
02245765	_derivationally_related_form	01106808
10786033	_hypernym	10630188
05230357	_hypernym	05225602
05551318	_synset_domain_topic_of	00015388
05945642	_hypernym	05941423
00201671	_derivationally_related_form	02232190
05888929	_hypernym	05835747
01641632	_derivationally_related_form	00061598
00238527	_derivationally_related_form	01644050
02349212	_derivationally_related_form	04895246
05262185	_hypernym	05261404
00662589	_derivationally_related_form	05825245
00245457	_derivationally_related_form	13489037
00911048	_derivationally_related_form	01654628
01563005	_derivationally_related_form	08648322
05784831	_derivationally_related_form	02130300
00256507	_derivationally_related_form	14315192
05748285	_derivationally_related_form	00119074
02603699	_derivationally_related_form	01932973
10150794	_derivationally_related_form	00636061
00740053	_hypernym	00670261
05373924	_hypernym	05418717
00150202	_also_see	00494907
10162991	_derivationally_related_form	02729023
07357388	_derivationally_related_form	00248659
01118449	_derivationally_related_form	09821253
05908520	_derivationally_related_form	00706975
07248507	_derivationally_related_form	00976365
05302499	_has_part	05304932
05216365	_has_part	05303402
01381357	_derivationally_related_form	10549510
05682950	_derivationally_related_form	00600724
02375131	_hypernym	02367363
07480896	_hypernym	00026192
02037272	_also_see	01549291
14412882	_hypernym	13932421
13904843	_derivationally_related_form	01559055
07272172	_derivationally_related_form	01588493
05943066	_derivationally_related_form	02464693
00844254	_derivationally_related_form	01762283
00011757	_derivationally_related_form	05854150
00770437	_derivationally_related_form	00042311
04076846	_derivationally_related_form	01686132
01088923	_hypernym	01850315
08063446	_derivationally_related_form	08060193
02258291	_hypernym	02257767
13812607	_derivationally_related_form	00031921
10355449	_derivationally_related_form	00345761
01775164	_derivationally_related_form	10077593
00920336	_derivationally_related_form	00141806
00126264	_derivationally_related_form	00199707
00726784	_verb_group	00726300
05829782	_derivationally_related_form	01815628
01456463	_derivationally_related_form	03045074
02621395	_derivationally_related_form	04933544
00803325	_derivationally_related_form	01138670
01621555	_derivationally_related_form	00923995
02548710	_derivationally_related_form	01209220
07289014	_hypernym	07283608
02952275	_synset_domain_topic_of	05946687
01322675	_derivationally_related_form	00388065
02625016	_derivationally_related_form	00003553
01650610	_hypernym	00348746
01932973	_derivationally_related_form	13955461
00590924	_derivationally_related_form	06593099
05331653	_hypernym	05328867
05603160	_derivationally_related_form	01201089
05978623	_hypernym	05978159
01734300	_derivationally_related_form	05301072
07339329	_derivationally_related_form	02569790
00806314	_derivationally_related_form	01212519
14778436	_hypernym	00007347
06733939	_derivationally_related_form	01015244
00030358	_derivationally_related_form	02367363
00940412	_derivationally_related_form	01632411
00631391	_also_see	01878466
00766418	_derivationally_related_form	07245125
00364479	_derivationally_related_form	04631298
09279458	_derivationally_related_form	02154508
00893955	_derivationally_related_form	02387034
01101329	_derivationally_related_form	00975902
09868270	_hypernym	09855630
00040962	_derivationally_related_form	02458103
00380083	_derivationally_related_form	00556193
05267548	_hypernym	05267345
13555446	_derivationally_related_form	00701040
05269901	_derivationally_related_form	05277728
14298815	_hypernym	14285662
01127019	_hypernym	01123598
06384708	_derivationally_related_form	01702514
00826509	_derivationally_related_form	09979589
01552519	_also_see	01554799
01638368	_hypernym	01631534
02215506	_derivationally_related_form	13365698
01215168	_derivationally_related_form	02556817
05677952	_derivationally_related_form	01977155
13367593	_hypernym	13367070
01147060	_derivationally_related_form	00562398
01022008	_derivationally_related_form	02376429
07203126	_derivationally_related_form	01011725
06598915	_hypernym	00033020
10046527	_hypernym	00007846
02501278	_derivationally_related_form	10225219
00765649	_derivationally_related_form	05195362
01127075	_hypernym	01476483
00020827	_hypernym	00001930
14007546	_derivationally_related_form	09190918
00634472	_hypernym	00628491
01776214	_hypernym	01775164
02713097	_hypernym	02887970
09201031	_hypernym	09304465
02128653	_derivationally_related_form	00879759
05329215	_has_part	05387167
10399491	_derivationally_related_form	02539788
01239494	_hypernym	01231252
00931040	_derivationally_related_form	01634424
02490877	_derivationally_related_form	00428000
05547396	_hypernym	08629508
14323683	_derivationally_related_form	02121511
05808218	_derivationally_related_form	00598954
02271544	_also_see	02578235
02513740	_also_see	01131043
15140405	_derivationally_related_form	10261041
01249315	_derivationally_related_form	00905399
00905399	_synset_domain_topic_of	08441203
02460502	_also_see	01222360
15271008	_derivationally_related_form	00779061
14419164	_derivationally_related_form	01492052
01012073	_derivationally_related_form	06732581
09821253	_derivationally_related_form	00347610
01802219	_hypernym	01802494
05565696	_derivationally_related_form	01210737
02554922	_derivationally_related_form	07251984
00603298	_hypernym	00829107
15142167	_derivationally_related_form	00056930
01011725	_derivationally_related_form	07203126
01220636	_derivationally_related_form	03967942
02747709	_derivationally_related_form	01017987
00633443	_derivationally_related_form	05773923
05199286	_hypernym	05190804
13244109	_derivationally_related_form	02203362
01230710	_derivationally_related_form	01261490
02609764	_derivationally_related_form	14562960
04096848	_hypernym	02796623
00503164	_hypernym	00137313
06389553	_derivationally_related_form	01494310
02578510	_derivationally_related_form	09902954
05761559	_derivationally_related_form	00611055
05501711	_hypernym	05501485
00037396	_hypernym	00030358
04897762	_derivationally_related_form	02518161
04110439	_hypernym	02678384
06725877	_hypernym	06722453
01921964	_derivationally_related_form	09206985
02333689	_derivationally_related_form	05075602
00681429	_derivationally_related_form	10066732
01813884	_derivationally_related_form	07529563
05565937	_hypernym	05221895
06078088	_hypernym	06037666
07050619	_hypernym	07048000
05633385	_derivationally_related_form	01632411
01621555	_verb_group	01640207
01922763	_also_see	01740892
00831191	_derivationally_related_form	00779360
10677713	_derivationally_related_form	01149138
10056103	_derivationally_related_form	00164816
00739662	_derivationally_related_form	08239808
01751545	_derivationally_related_form	03511426
09927451	_hypernym	09505153
04850117	_derivationally_related_form	00956131
06532330	_synset_domain_topic_of	08441203
01212519	_derivationally_related_form	02453889
00404642	_derivationally_related_form	01008378
02608823	_derivationally_related_form	00235435
01135952	_synset_domain_topic_of	01094725
00518395	_derivationally_related_form	01208291
05311054	_has_part	05314255
05141222	_hypernym	05138488
00805376	_verb_group	01035530
00040804	_hypernym	00040152
00532607	_derivationally_related_form	03838160
00142191	_derivationally_related_form	04677514
05703429	_derivationally_related_form	02169352
00380083	_derivationally_related_form	00184117
00090186	_derivationally_related_form	07510625
00007846	_hypernym	00007347
02468793	_derivationally_related_form	13583724
00237078	_derivationally_related_form	02432530
07997703	_member_meronym	08103457
01765392	_derivationally_related_form	09952163
02749778	_derivationally_related_form	08053576
08420278	_derivationally_related_form	02310855
13905121	_derivationally_related_form	01555742
13844212	_hypernym	00031921
05563266	_has_part	05352433
09802239	_synset_domain_topic_of	00933420
01198779	_derivationally_related_form	00836788
05675905	_derivationally_related_form	00594621
04946553	_derivationally_related_form	01209678
00719231	_derivationally_related_form	00180413
00003553	_has_part	03892891
01021889	_derivationally_related_form	00668099
05466696	_hypernym	05465567
00588221	_hypernym	00588888
00763399	_derivationally_related_form	07177924
05504532	_hypernym	05462674
01053207	_derivationally_related_form	00924431
05654362	_derivationally_related_form	02163746
00290740	_derivationally_related_form	09476521
10058411	_derivationally_related_form	01190948
00082081	_derivationally_related_form	05154908
00905399	_derivationally_related_form	01249315
05776212	_hypernym	05775407
01059123	_derivationally_related_form	06628861
00243373	_derivationally_related_form	02395782
00342980	_hypernym	00339934
10509605	_hypernym	00007846
05216365	_has_part	05563770
05549830	_has_part	05552607
09224911	_hypernym	00019128
01643657	_derivationally_related_form	04485226
01015866	_hypernym	01015244
02563327	_hypernym	02560164
06428216	_derivationally_related_form	01549187
10568443	_derivationally_related_form	02556817
05786372	_derivationally_related_form	00607780
07974025	_hypernym	07942152
00014549	_derivationally_related_form	10484526
05111835	_hypernym	05109808
00113113	_hypernym	00112312
01332730	_verb_group	01336635
01072072	_hypernym	00407535
02877704	_derivationally_related_form	05479314
03664514	_hypernym	03183080
04933544	_derivationally_related_form	02620587
00849982	_derivationally_related_form	00056334
00955148	_derivationally_related_form	06605897
00611802	_derivationally_related_form	05760202
10671898	_derivationally_related_form	02548710
07544647	_hypernym	00026192
05546540	_has_part	05339357
07214432	_derivationally_related_form	01637982
02513269	_also_see	01781478
05827684	_derivationally_related_form	02116118
13970764	_derivationally_related_form	01765392
01167146	_derivationally_related_form	01612053
01105259	_derivationally_related_form	01950798
01023574	_verb_group	01023259
10743124	_hypernym	10741590
01621555	_derivationally_related_form	05845140
01194483	_derivationally_related_form	04660536
09811712	_hypernym	09610660
07494363	_hypernym	00026192
00053913	_derivationally_related_form	00495998
01368192	_also_see	01364008
02550868	_derivationally_related_form	13247554
00094460	_derivationally_related_form	00041899
00642098	_hypernym	00637259
02154508	_derivationally_related_form	05818741
02625016	_hypernym	02624263
00240131	_derivationally_related_form	00883611
01096497	_derivationally_related_form	01033458
05935060	_derivationally_related_form	00604576
01904930	_derivationally_related_form	00284798
07492516	_hypernym	07490713
08101085	_synset_domain_topic_of	06037666
02578235	_also_see	02271544
00657260	_derivationally_related_form	05838765
02608347	_derivationally_related_form	00235435
01181475	_synset_domain_topic_of	08441203
00772189	_derivationally_related_form	09997404
05670972	_hypernym	05670710
05566504	_hypernym	05566919
05559727	_hypernym	05220461
10001058	_hypernym	00007846
01684337	_verb_group	01551871
02203362	_derivationally_related_form	13244109
00920336	_verb_group	00662589
02743261	_derivationally_related_form	02472293
01082454	_hypernym	01072949
01121690	_derivationally_related_form	02344060
00290740	_derivationally_related_form	00355252
01794668	_hypernym	01771535
02111684	_similar_to	02112891
00235435	_derivationally_related_form	02600948
00482893	_derivationally_related_form	00185104
02616713	_derivationally_related_form	13962360
04321238	_derivationally_related_form	01329239
01211019	_derivationally_related_form	02554922
03005920	_derivationally_related_form	00126264
09608002	_derivationally_related_form	02612762
01205961	_derivationally_related_form	00101609
03748886	_derivationally_related_form	02260362
02656763	_derivationally_related_form	04105893
01072565	_hypernym	00191142
10209246	_derivationally_related_form	01789514
13962166	_derivationally_related_form	02616713
02298160	_derivationally_related_form	01097292
01835496	_also_see	01968569
05546540	_has_part	05588551
07296428	_derivationally_related_form	00109660
01136519	_derivationally_related_form	02432530
10724699	_derivationally_related_form	02012344
00364479	_also_see	01368192
00396703	_derivationally_related_form	00380083
07177924	_derivationally_related_form	00763399
00789906	_hypernym	00789534
04898437	_derivationally_related_form	01878466
00918312	_derivationally_related_form	05775407
10160012	_hypernym	09821253
08550076	_derivationally_related_form	01309701
06054700	_derivationally_related_form	10041195
09608002	_hypernym	10401829
05324553	_hypernym	13864153
01115349	_similar_to	01116026
00991838	_derivationally_related_form	14864360
00715239	_derivationally_related_form	05916739
05946687	_derivationally_related_form	01783158
01435380	_derivationally_related_form	10578762
07452841	_derivationally_related_form	00612612
02506546	_hypernym	00770437
03100490	_derivationally_related_form	01435380
00689344	_derivationally_related_form	07138915
00908621	_verb_group	02684254
10284064	_derivationally_related_form	00142191
01933900	_derivationally_related_form	05250659
05784242	_derivationally_related_form	02166460
04007894	_derivationally_related_form	01621555
00294884	_derivationally_related_form	13970764
08108784	_synset_domain_topic_of	06037666
00958334	_derivationally_related_form	06768901
08357784	_hypernym	08164585
01115349	_also_see	02460502
05692910	_derivationally_related_form	02536557
00185104	_derivationally_related_form	00482473
00064095	_derivationally_related_form	07493280
00516086	_derivationally_related_form	02489748
00101609	_derivationally_related_form	01205961
03879854	_derivationally_related_form	00064095
07553301	_hypernym	00026192
00007846	_has_part	04617562
01741446	_derivationally_related_form	13085864
01261974	_derivationally_related_form	00770437
00886978	_hypernym	00887463
00185104	_derivationally_related_form	00482893
02112891	_derivationally_related_form	14841267
00633265	_derivationally_related_form	10510339
08482271	_derivationally_related_form	01999423
13489037	_derivationally_related_form	00245457
00004605	_derivationally_related_form	14842091
02448185	_derivationally_related_form	08164585
01762283	_hypernym	01761706
01775164	_derivationally_related_form	09622302
02230772	_also_see	02230247
01355326	_hypernym	01342269
04890112	_derivationally_related_form	02569130
01783158	_derivationally_related_form	04826999
01127623	_hypernym	01127019
00763399	_derivationally_related_form	06649567
01825671	_also_see	01824244
01476483	_derivationally_related_form	01074694
00227507	_derivationally_related_form	00127531
04826999	_hypernym	04826771
07140978	_derivationally_related_form	00812580
07553964	_hypernym	07553301
00354884	_derivationally_related_form	01815185
00055539	_derivationally_related_form	00849982
01206153	_hypernym	01202904
01558883	_derivationally_related_form	09437369
07515560	_derivationally_related_form	01922763
01410363	_derivationally_related_form	04748836
00643250	_derivationally_related_form	01628449
01612053	_derivationally_related_form	02542795
11531090	_hypernym	00017222
05003090	_derivationally_related_form	01906823
01628449	_derivationally_related_form	00643250
01968569	_hypernym	01835496
09612848	_derivationally_related_form	01156834
00066025	_hypernym	00066191
05305806	_hypernym	05301392
01229938	_hypernym	01080366
13989627	_derivationally_related_form	01319874
00760956	_derivationally_related_form	01240210
05830059	_derivationally_related_form	01792567
00316594	_derivationally_related_form	01974062
00162632	_hypernym	00161243
11410625	_derivationally_related_form	02635659
00149262	_hypernym	00147862
11414411	_hypernym	11410625
01329239	_derivationally_related_form	04179385
02938886	_derivationally_related_form	00637259
00973077	_synset_domain_topic_of	08199025
10161178	_derivationally_related_form	01789514
01129876	_derivationally_related_form	09614684
00836236	_derivationally_related_form	01981699
09882716	_hypernym	09609232
04683453	_hypernym	04673965
07452699	_derivationally_related_form	02426171
06552984	_hypernym	06479665
13440063	_hypernym	13526110
06367373	_derivationally_related_form	01635176
07325190	_derivationally_related_form	02379528
00654625	_derivationally_related_form	07997703
06768901	_derivationally_related_form	00958334
07285403	_derivationally_related_form	02110220
01042531	_derivationally_related_form	07211752
00874067	_hypernym	00030358
07969695	_derivationally_related_form	03074922
00381601	_hypernym	00109660
06158346	_derivationally_related_form	00630026
05572940	_hypernym	05570839
02373015	_verb_group	02051031
05797177	_hypernym	05770926
02107588	_hypernym	02106506
01017987	_derivationally_related_form	00781000
05301392	_hypernym	05305614
02425913	_derivationally_related_form	00229260
05263850	_hypernym	00019613
00173338	_derivationally_related_form	00053913
02050132	_hypernym	01835496
04760771	_hypernym	04723816
03181293	_derivationally_related_form	02154508
10633450	_derivationally_related_form	02150510
10461424	_derivationally_related_form	00747418
00003356	_similar_to	00003553
00923995	_derivationally_related_form	01632411
01711071	_derivationally_related_form	07494363
05302499	_hypernym	05610008
13532886	_derivationally_related_form	00360932
05311054	_has_part	05319936
01311378	_derivationally_related_form	03996416
01039140	_has_part	00094240
06260121	_derivationally_related_form	01933900
