# Supplementary material
Source: ML conference proceedings conference paper supplement (https://proceedings.neurips.cc/paper_files/paper/2021/hash/0fd600c953cde8121262e322ef09f70e-Abstract.html)
Supplement: Supplementary file 1 [file 0fd600c953cde8121262e322ef09f70e-Supplemental.zip › Supplementary_Material_Paper_8745/data/Hamaguchi-BM_both-3000/test/test-graph.txt]

25982	1	36930
37705	3	5262
34700	4	12631
34700	5	7252
37549	0	15132
37549	2	15904
34191	3	37401
29879	0	37517
10868	6	35870
37220	0	13314
37220	2	5856
37220	2	20062
37220	2	16122
37220	2	31423
17583	0	37706
6328	8	37159
35926	2	29689
3288	5	35719
3288	2	35365
11612	0	35463
19793	0	37044
780	0	37743
37071	0	19905
37071	6	29367
37071	6	25432
37071	6	20077
37071	6	30961
37071	6	22058
37071	6	20578
37071	6	32822
37071	6	611
37071	6	20847
37071	6	16695
37071	6	2961
37071	6	9448
37071	6	12151
37071	6	32080
37071	6	18434
37071	6	7808
37071	6	30986
37071	6	19197
37071	6	12501
37071	6	27671
37071	6	3046
37071	6	34213
37071	6	26595
37071	6	20690
37071	6	14522
37071	6	24500
37071	6	24065
37071	6	6601
37071	6	31728
33700	8	36856
23414	0	37849
16010	0	35278
36356	2	6158
10041	3	36755
27879	0	36232
37133	0	3309
37133	4	30278
37131	8	3191
37131	8	10781
29177	4	36126
35559	3	17542
35559	6	23173
35559	6	12436
31254	4	37963
11755	8	36483
23952	3	37577
14130	3	34662
1260	0	37376
1260	3	36814
30481	1	35560
7006	0	35637
10519	0	37743
30365	2	36226
5323	2	36718
35802	0	8544
35833	0	29243
35833	3	34564
35833	2	7682
35833	2	1859
35833	2	8272
8171	0	34874
29907	0	37958
3655	1	35103
36523	6	561
36523	6	32766
36523	6	18627
36523	6	30824
13093	0	35280
21995	2	35709
7572	0	37337
24638	0	36906
34741	9	25306
34741	9	2644
34741	9	4908
34741	9	11403
34741	9	21626
34741	9	23750
34741	9	28841
34644	6	15454
34644	6	20252
34644	6	26189
34644	6	29467
34644	6	1034
34644	6	26928
34644	6	17061
34644	6	16592
34644	6	18394
34644	6	1108
34644	6	207
36187	3	21721
36187	6	21794
35266	2	11457
35266	2	18305
35266	2	23305
35266	2	19222
35266	2	17696
27687	1	35560
3720	0	36232
3720	3	36328
36027	5	8033
36027	5	24961
30670	0	37698
29413	0	34798
26203	0	35141
5513	0	37408
23285	0	37698
16500	0	35229
29194	8	37642
22425	0	35967
30642	1	35036
9111	5	37819
37621	5	9470
24193	4	35822
34965	10	15646
34965	5	33993
34965	2	21986
34965	5	11912
34965	5	7071
34965	5	1997
34965	5	16716
34965	5	15077
34965	5	15770
34965	5	975
34965	5	13069
34965	5	7678
34965	5	9101
34965	5	14202
34965	5	31602
34965	5	10579
34965	5	16066
34965	5	32787
34965	5	26907
34965	5	6335
34965	5	16113
34965	5	25186
34965	5	21017
34965	5	28624
34965	5	18066
34965	5	22561
34965	5	8859
34965	5	25897
28825	4	36653
30407	8	37159
1929	0	36641
20198	0	35526
16450	0	37571
16450	1	37885
34139	3	36873
37039	5	31800
11708	0	36233
2269	0	36232
36752	2	10922
4417	0	37337
37153	0	956
37153	2	6832
34865	4	17057
6345	8	34653
18593	0	35227
36577	6	2230
36657	3	23997
36657	6	9606
19420	0	35465
10481	0	37640
3734	0	36682
3734	3	35574
18205	0	35147
35490	0	29010
30984	0	37337
10200	5	35208
37050	2	23400
37050	6	34417
37050	6	30150
22362	1	35036
35256	2	20221
35256	2	436
35256	2	18562
35256	2	7791
35256	2	15958
35256	2	8085
35256	2	3014
35256	2	28203
35256	2	28433
35256	2	28153
24552	0	34878
33614	3	37035
3450	0	36784
31864	0	37750
13568	0	37750
117	3	36981
2434	0	37149
21755	1	36922
19503	0	35690
36724	0	32218
36724	2	5592
36471	4	28163
36471	4	22948
36471	2	29545
36471	2	12303
36471	2	33094
36471	2	9567
36471	2	24611
36471	2	11200
37099	2	15013
19363	8	36538
19363	8	36427
19363	4	36416
24682	8	36538
24682	8	36427
24682	4	35849
15308	1	34642
36653	0	30974
36653	4	32566
36653	5	2119
36653	5	27280
36653	5	10833
36653	5	28825
36653	5	29498
36653	5	511
36653	5	31260
17691	0	36052
1857	8	36856
36479	0	28388
37285	8	13721
37285	1	19186
34446	0	35278
34446	3	35462
27458	8	36287
28823	0	37857
28823	3	34942
27198	8	34653
27198	1	35991
16420	0	34591
34552	8	35198
10165	4	35662
11429	0	35390
15895	4	35414
34961	2	6271
37839	9	24105
37839	9	25288
37839	9	18042
37839	9	14294
37839	9	9496
37839	9	18392
37839	9	13081
37839	9	31993
37839	9	22760
37839	9	8318
37839	9	24475
37839	9	7768
37839	9	17529
37839	9	26866
37839	9	24989
37839	9	24677
37839	9	33529
37839	9	27620
37839	9	33569
37839	9	27291
37839	9	31316
37839	9	31322
37839	9	20637
37839	9	2604
37839	9	21324
37839	9	31499
37839	9	34121
37839	9	12769
37839	9	21014
37839	9	26931
37839	9	6435
37839	9	22299
37839	9	15104
37839	9	21285
37839	9	15206
37839	9	21502
37839	9	29141
37839	9	3177
37839	9	2046
37839	2	20650
37839	9	30012
37839	9	31672
37839	9	874
37839	9	14718
37839	9	4221
37839	9	8703
37839	9	16278
37839	9	13537
37839	9	25130
37839	9	17876
37839	9	25795
37839	9	16729
37839	9	29853
37839	9	9335
37839	9	33590
37839	9	23827
37839	9	23478
37839	9	6508
37839	9	12302
37839	9	31344
37839	9	23298
37839	9	9324
37839	9	14242
37839	9	11204
37839	9	21628
37839	9	33242
35835	0	30812
35835	2	31931
35676	0	26000
24220	0	37289
18123	3	35691
37025	3	22050
37025	2	24994
25370	0	35433
7890	0	37376
34848	4	26646
34848	5	17711
34848	5	1684
34848	5	5432
34848	5	10011
34848	5	28802
6627	0	37968
16323	3	35241
36374	6	33189
22177	0	36802
35319	0	17731
35319	4	30792
35598	2	26087
16285	0	36412
2199	3	36076
35105	2	26048
35105	2	2060
35316	2	14553
35316	2	3900
23954	0	34844
23954	3	36720
6605	7	34991
35016	0	24111
35016	2	33204
35016	2	877
37796	6	18846
37796	6	4948
37796	6	29176
1844	0	34687
1844	0	36436
8433	0	34636
35224	5	27513
34731	3	19392
34731	2	22756
34731	2	9646
34731	2	11023
34731	2	18826
34731	2	17111
34731	2	13026
34731	2	2763
34731	2	14439
34731	2	8881
34731	2	9538
34731	2	28048
34731	2	23105
34731	2	24626
34731	2	3678
34731	2	17387
34731	2	23663
34731	2	3964
34731	2	5262
34731	2	26833
34731	2	12603
34731	2	12336
34731	2	3711
34731	2	28655
34731	2	30069
34731	2	16918
34731	2	27495
34731	2	24714
34731	2	31346
34731	2	1942
34731	2	31845
34731	2	34342
34731	2	32255
34731	2	28049
34731	2	17564
34731	2	30174
34731	2	34106
34731	2	367
34731	2	23110
34731	2	6344
37622	6	25679
15955	0	37337
26292	6	36180
37004	0	2290
17152	0	34898
36635	2	4395
36635	2	14385
36635	2	6776
36635	2	22194
3934	0	37252
19055	0	37408
34995	2	22275
34995	2	9021
34995	2	8730
35977	0	31432
35977	5	33943
7709	0	35676
7680	4	36485
20390	1	34941
35893	3	32706
35893	6	14357
35893	6	29200
35893	6	29153
35893	6	27038
35893	6	7714
35893	6	20369
35893	6	3620
35893	6	12695
33816	0	37750
29708	1	35569
25906	8	37323
36391	4	13730
11173	0	37607
35644	2	31110
35644	2	4389
37415	2	20800
37415	2	10143
37415	2	1771
37415	2	18653
37415	2	6392
37415	2	11970
37415	2	28401
37415	2	3391
37415	2	20901
37415	2	21877
37415	2	32109
36591	3	13146
36591	6	19034
35095	0	17849
35095	6	26399
35095	6	7500
35095	6	9334
35095	6	24294
37719	0	20851
37719	2	7640
37719	2	25222
37719	2	18878
37719	2	21389
35377	2	13870
35377	2	16583
35377	2	34358
35377	2	10673
35377	2	12356
35377	2	20622
35377	2	27060
35377	2	23116
35377	2	28184
35377	2	22951
35377	2	4941
35377	2	10488
35377	2	16524
35377	2	13232
35377	2	18933
35377	2	10368
35377	2	14584
35377	2	9355
35377	2	2346
35377	2	6042
35377	2	30601
35377	2	13955
35377	2	2804
35377	2	26061
35377	2	30409
35377	2	21403
35377	2	26211
35377	2	15151
35377	2	16156
35377	2	20558
35377	2	12209
35377	2	27983
35377	2	18306
35377	2	3847
35377	2	30375
35377	2	34157
35377	2	21083
35377	2	27779
35377	2	28088
35377	2	26480
35377	2	31782
35377	2	6006
35377	2	1496
35377	2	30956
35377	2	29357
35377	2	30066
35377	2	30224
23082	1	35036
36501	0	19726
36501	2	21350
36501	2	34056
34345	1	37094
21766	8	35876
23815	0	35782
21136	0	37299
37939	3	5726
37939	6	9900
36997	0	16327
36997	3	4638
29168	0	35605
10319	0	37942
3421	8	36483
37553	2	10919
17698	2	35260
17698	2	37747
25844	2	37312
2994	0	35028
35513	6	12456
36616	0	32921
36616	6	15150
36616	6	14197
2774	3	37225
22560	2	36527
36501	2	32168
9077	0	36708
36348	3	20190
36046	0	8446
36046	2	12044
36046	2	22281
36046	2	27242
35462	6	32380
35462	6	30922
35462	6	10022
35462	6	24553
35462	6	15387
35462	6	16010
35462	6	16987
35462	6	23396
35462	6	26438
35462	6	22510
35462	6	3429
35462	6	4066
35462	6	16756
35462	6	19759
35462	6	22806
35462	6	2534
35462	6	12188
35462	6	15191
35462	6	17478
35462	6	8281
35462	6	12888
35462	6	23687
35462	6	17184
35462	6	26539
35462	6	34446
35462	6	5065
35462	6	8226
35462	6	33080
35462	6	20067
35462	6	6716
35462	6	21135
35462	6	27297
35462	6	30060
35462	6	25784
35462	6	21657
35462	6	14929
35462	6	9429
35462	6	6887
35462	6	18883
35462	6	8908
35462	6	34481
35462	6	13898
35462	6	357
35462	6	11145
35462	6	7575
35462	6	30207
35462	6	13596
35462	6	30540
35462	6	18215
35462	6	20460
35462	6	18787
35462	6	20102
7022	8	36856
96	0	37640
96	3	37084
37375	3	4919
37375	6	13628
1735	0	36719
26427	0	37463
26277	8	34653
26277	1	35991
17407	0	35308
28297	1	35748
6305	0	35282
4325	1	35883
7849	4	36435
32343	8	34653
26304	8	36538
30873	0	35172
30873	1	35883
35353	0	13314
35353	3	18324
35353	2	26643
35353	2	11966
3847	0	35377
32698	0	37044
34854	3	32605
35192	6	13054
36011	6	5970
37681	3	27398
37681	6	28358
37681	6	22683
37681	6	30850
35499	0	24111
35499	9	33986
35499	5	33318
35499	5	24315
35499	5	16411
35499	2	3208
35499	5	3724
35499	5	13200
35499	5	30029
35499	5	31624
35499	2	24026
35499	5	31402
35499	2	31983
35499	5	8502
35499	5	19519
35499	5	6312
35499	5	26169
35499	5	17144
35499	5	34416
35499	2	17254
35499	5	27228
35499	9	2172
35499	9	24354
27020	0	35829
27020	4	35904
29623	0	37276
1817	0	35938
1817	2	36460
1817	2	35527
35314	2	30050
35314	2	26316
35314	2	4380
35314	2	19292
35314	2	25359
35314	2	14721
35314	2	12964
35314	2	13125
35121	6	24547
32284	4	35501
9834	0	37315
37107	2	9208
2961	3	37071
35198	2	30887
35198	2	34552
35198	2	23945
35198	2	12540
35198	2	19444
35198	2	27618
37596	3	10296
2339	0	36849
28198	8	34653
37649	8	18792
37649	5	6218
37649	5	2701
37649	5	22249
37649	5	11940
37649	5	23565
37649	5	30385
37649	5	27878
37649	5	1310
37649	5	25082
36670	8	25573
1011	0	37844
13753	3	37167
13989	0	37519
24589	0	35021
24589	1	35036
21878	3	35816
36061	0	18809
36061	2	31931
36061	2	20493
36061	2	1132
36061	2	8981
36061	2	1385
36061	2	31118
35671	4	4973
9727	0	36791
9727	1	35883
35387	0	27232
27964	8	37526
27964	5	36815
35092	3	24373
35092	6	7408
35092	6	15661
35092	6	19314
35092	6	19800
35092	6	30200
35092	6	8950
16918	0	34731
14283	3	34866
36037	8	13016
15699	8	37918
35692	3	12803
35692	6	26938
36292	6	34494
36292	6	13155
37504	0	7779
37504	2	26237
37504	2	9829
31819	0	35205
35858	5	29455
3275	0	36853
17737	2	35457
5626	0	37290
5626	2	37290
24574	3	35902
21135	0	35278
21135	3	35462
15855	1	35883
854	3	35129
7192	8	37159
35250	2	5332
28619	0	37337
10196	1	37252
34850	0	23467
34570	0	20326
36712	2	17039
36712	2	16235
36712	5	326
34934	0	23658
34934	2	12209
35018	0	34335
35018	4	29725
35018	4	3133
35018	4	7950
35018	2	31294
35687	4	10984
35687	10	12419
35687	10	6906
35687	10	27198
35687	10	31527
35687	5	19237
35687	5	3981
35687	5	14888
35687	6	7643
35687	10	20969
3917	8	35182
3917	3	36047
12653	0	36569
37759	6	562
35981	2	16578
35981	2	28791
12130	2	34974
7282	0	35404
7282	4	37237
26239	0	35280
31735	1	35560
36410	2	18267
36410	2	10492
36410	2	12907
36410	2	2397
36410	2	3235
36410	2	31060
36410	2	28789
36410	2	30090
36410	2	15880
36410	2	21462
36410	2	33374
36410	2	7566
35357	2	28447
35357	2	20874
35357	2	20104
35357	2	16950
35357	2	15288
35357	2	14947
37495	5	26761
37495	2	33292
37495	2	20304
37495	2	33000
37495	2	18462
37495	2	26870
37495	2	26719
37495	2	30799
19199	0	36053
36038	0	22718
36038	3	11665
10242	0	34905
9133	0	37015
34769	2	17272
34769	2	21693
32853	0	37566
37918	2	22843
37918	2	26611
37918	2	24460
37918	2	15415
37918	2	451
37918	2	7549
37918	2	24831
37918	2	9827
37918	2	15518
37918	2	31001
37918	2	13062
37918	2	12579
37918	2	15699
37918	2	9805
37918	2	28736
37918	2	28735
37918	2	1591
37918	2	17391
36898	3	29888
36898	6	19980
8549	8	36538
8549	4	36960
19198	0	37052
23660	1	35036
10670	0	34898
31021	0	37698
31949	4	35313
36518	7	20226
36518	7	32765
36909	4	26002
36909	4	1484
26846	0	35990
21998	3	35474
28820	0	34762
35908	2	16203
35908	2	2746
35908	2	619
30887	8	35198
36512	2	25574
36512	2	15373
36512	2	29904
36512	2	15070
31535	3	37176
35563	3	5214
35563	6	33813
35805	2	25938
35805	2	14472
37754	5	13584
37754	5	23852
37754	5	10048
37754	5	6593
37754	5	30851
37754	5	34346
37754	5	24126
37754	5	30912
34902	0	7803
37010	0	23806
36053	2	30217
36053	2	18376
36053	2	19199
36053	2	26283
36036	0	16846
37167	6	17346
37167	6	8159
37167	6	29283
37167	6	15999
37167	6	3038
37167	6	27213
37167	6	11815
37167	6	22604
37167	6	18516
37167	6	16201
37167	6	17550
37167	6	21548
37167	6	13753
37167	6	7842
37167	6	23899
36957	2	23535
36957	2	20899
36957	2	31555
36957	2	13126
1498	0	34960
20615	0	35717
23597	0	34956
5158	0	35122
37179	2	1504
37179	2	25873
37179	2	3372
35389	2	34526
1452	0	34764
1452	3	35845
31223	0	37463
36994	0	17849
36994	3	26806
9482	0	35852
9482	3	36017
3956	4	35913
15826	0	35096
7393	0	36578
7393	6	34623
31765	0	37743
36403	0	4440
36805	3	29063
36805	6	10523
36805	6	18999
262	0	37463
35008	0	3629
35008	6	31346
36160	0	10415
18072	0	35990
18072	3	35507
18130	0	37743
35317	0	3465
33742	0	36853
35526	2	28373
35526	2	20198
35886	8	15058
35886	8	14949
1506	0	37853
35318	6	14173
35147	0	33860
35147	0	8330
35147	2	6509
35147	2	29377
35147	2	13099
35147	2	26771
35147	2	32869
35147	2	642
35147	2	3002
35147	2	18205
35147	2	30460
35147	2	572
35147	5	6245
34740	2	1388
34740	2	2952
23552	5	37617
13439	0	35676
27418	8	36483
15082	0	35907
15651	0	34898
26521	3	36587
37744	6	5844
24015	8	34653
24015	1	35991
35636	2	5869
34960	2	1498
34960	2	8836
34960	2	34246
34960	2	14614
34960	2	16243
35386	3	21022
35386	6	5422
30675	0	35907
15942	8	37159
34963	0	14947
34963	2	13882
4780	0	37337
37229	2	27373
37229	2	23493
37229	2	7441
37229	2	25110
37229	2	25667
37229	2	22579
35998	8	24414
35998	4	18797
35998	9	25175
35998	9	10350
35998	9	21822
35998	9	26040
35998	9	8981
35998	9	32545
35998	9	27300
35998	9	16773
35998	9	22844
35998	9	32746
35998	9	21366
35998	9	16176
35998	9	33803
35998	9	13738
37562	2	25282
15647	0	37156
18848	0	36719
18848	4	37535
7905	8	37776
36748	2	31195
27231	8	36538
29977	3	36705
14404	0	36765
11583	2	34614
11583	2	35972
36880	0	3506
35238	0	9223
19452	0	36719
9471	0	35245
24041	8	37159
35099	0	4028
35099	9	8491
35099	9	5258
35099	9	2035
35099	9	33593
35099	9	24751
35099	9	29506
35099	9	19644
35099	9	24905
35099	9	28874
35099	9	31035
35099	9	7716
35099	9	8804
35099	9	32066
35099	9	12305
35099	9	15724
35099	9	2118
35099	9	26295
35099	9	12283
35099	9	25175
35099	9	5142
35099	9	29920
35099	9	16029
35099	9	21072
35099	9	20519
35099	9	12134
35099	9	5872
35099	9	12934
35099	9	28330
35099	2	30492
35099	2	18884
35099	2	27848
35099	2	26991
35099	2	30197
35099	9	19335
35099	9	30061
35099	9	15314
35099	9	31766
35099	9	27765
35099	9	19734
35099	9	33000
35099	9	3291
35099	9	19955
35099	9	34233
35099	9	30123
35099	9	21897
35099	9	23903
35099	9	32912
35099	9	23295
35099	9	5577
35099	9	5201
35099	9	5715
35099	9	1344
35099	9	3131
35099	9	13671
35099	9	30129
36488	8	29494
9675	0	37337
20235	0	35782
1522	2	34788
3957	5	37944
34690	6	17490
34690	6	18707
36435	4	23335
36435	5	19116
36435	5	21478
36435	5	13156
36435	5	22346
36435	5	7849
36435	5	14027
35960	2	5789
6681	8	34804
6681	4	37563
36759	2	6900
25076	0	35405
25076	3	36153
34579	0	10637
34579	3	11872
34904	0	11836
34904	9	24936
34904	2	24254
34904	9	5687
34904	9	12420
34904	9	14543
34904	9	518
34904	9	12917
33378	0	35564
35609	3	26213
7643	0	37178
7643	3	35687
4987	0	36719
36207	5	29816
23936	0	37337
26455	0	35205
37891	6	3529
35414	5	30822
35414	5	15895
35414	5	31022
18435	3	35966
1301	0	37750
184	2	35883
36293	0	31091
36293	2	16512
36293	2	17578
36293	2	29571
36293	5	3972
23366	0	36988
34928	3	12364
37241	2	22351
37241	2	9618
13425	0	37089
36843	3	15442
10301	0	36719
36508	0	43
36508	6	1238
36508	6	2164
24961	4	36027
36807	2	11958
36807	2	5239
36807	2	9466
36807	2	34015
36807	2	17352
36653	4	10446
37268	0	13775
34805	0	14019
34805	2	29450
34805	2	21263
37013	6	19172
35913	10	553
35913	10	10860
35913	10	15585
35913	10	3108
35913	5	3956
35913	5	9336
35913	5	32391
35913	5	27926
35913	5	21704
35913	5	22475
35913	5	23047
35913	5	424
35913	5	0
35913	6	21374
15142	1	37021
36128	0	32945
36128	3	13505
36281	5	5525
36281	5	21231
36281	5	30502
36281	5	813
36281	5	29860
36281	5	24363
36281	5	27140
36281	5	10124
36281	5	16973
36281	5	15246
36281	5	25094
36281	5	7811
31344	1	37839
4596	2	36100
34943	5	30947
36734	2	3000
36734	2	8481
36734	2	33912
36734	2	1427
36734	2	5705
36734	2	27069
36734	2	25604
37914	6	6237
34964	3	9689
204	0	36935
23159	8	36538
34632	1	9514
34632	2	9248
34632	2	31113
6222	0	37743
36437	0	14374
36437	3	24965
37760	1	29378
37760	2	12471
35693	3	18583
35693	2	12058
19210	8	36838
34989	6	33840
37579	6	12259
37579	6	19030
35682	0	1214
35682	3	26154
32422	5	35863
16284	0	34898
788	2	37578
3239	0	35770
35544	5	2176
35544	6	31354
19489	8	36538
34642	9	15308
34642	9	23338
34642	9	8909
34642	9	18291
34642	9	29329
34642	9	5438
34642	9	30793
34642	9	34371
34642	9	22998
34642	9	14683
34642	9	6682
34642	9	4683
34642	2	28082
34642	2	18507
34642	2	19693
34642	9	11921
34642	2	22337
34642	2	1334
34642	2	33963
34642	2	11870
34642	2	7694
34642	2	27652
34642	2	32278
34642	2	1200
34642	2	25787
34642	9	3807
34642	9	33237
34642	9	13804
34642	5	27747
34642	9	24078
34642	2	29942
34642	9	14805
34642	9	30083
34642	9	4104
34642	9	21647
34642	9	22191
34642	9	33428
34642	9	28045
30250	0	35605
36486	0	18040
32706	0	37820
32706	3	34748
32706	6	34764
32706	6	35893
9256	0	35518
9256	3	37298
13428	0	37376
13428	3	36814
22141	4	35822
35283	2	21148
35283	2	24120
35283	2	15184
35283	2	24794
6477	0	37849
32102	0	35136
23219	2	35466
23219	2	34754
35940	0	1820
35873	6	29356
11691	1	35560
11691	2	35821
37056	2	13922
37056	2	32526
37056	2	25727
14012	0	35798
37927	0	9017
37927	2	2565
37927	2	22879
37927	2	23931
37927	2	19952
37927	2	12419
37927	2	970
37927	2	16821
37927	2	8841
32629	0	37337
29299	0	34976
36013	9	23265
36013	9	3718
36013	5	6336
36013	2	5814
36013	2	17596
36013	2	13945
36013	2	10722
36013	2	15359
36013	2	10891
36013	2	20155
36013	2	375
36013	2	2243
36013	5	23806
36013	9	31671
36013	9	18550
36013	9	32458
36013	2	26762
36013	2	21821
36013	2	14805
36013	2	21787
36013	9	29263
36013	9	13421
34806	0	6699
34806	2	24893
37077	2	17083
34691	2	16998
5284	0	37244
19051	0	36719
28901	4	35501
8872	0	35278
37369	6	17393
37369	6	9998
35467	2	3355
35467	2	7379
35467	2	17483
35467	2	17976
35467	2	11663
35467	2	4231
35467	2	11440
35467	2	7058
35467	2	551
35467	2	25238
35467	2	22736
35467	2	6153
35467	2	20671
28726	0	37188
28726	2	35965
8247	1	36930
9900	3	37939
7613	1	35560
32728	0	36624
37177	6	3831
1101	0	37743
36259	0	3367
37574	4	30433
19621	0	37472
36334	2	20048
36334	2	22307
36334	2	26370
22212	0	37750
12211	8	36483
12211	4	35407
24521	0	35345
11373	4	37963
26831	0	36936
19854	0	34898
19854	3	35879
17417	0	36719
10298	0	34596
36014	0	11276
36014	2	1284
36014	2	29814
36014	2	28002
36014	2	19504
36014	2	9890
36014	2	18134
35881	2	13158
3530	0	35009
3530	2	37063
25313	0	37376
2659	3	37333
3152	0	37698
8450	3	35474
34416	4	35499
4580	8	35215
33975	0	35022
37702	4	13314
37702	4	12050
37702	4	5855
37702	2	34476
2290	1	37252
2290	2	37004
36268	6	8081
34887	3	16075
9095	1	35569
2573	1	35560
21066	4	35953
2783	8	35876
16496	0	37263
37303	6	21866
36388	6	26310
36388	6	20873
36388	6	23971
36388	6	21488
36388	6	15913
905	0	36719
29594	0	37750
33484	0	36578
30847	0	37376
30847	3	36814
30866	4	37624
6754	0	36719
6754	3	35176
35043	2	10773
35043	2	11822
34676	0	2272
34676	2	13591
36555	0	14054
21842	0	36232
6187	3	34787
37497	0	6722
37497	2	3809
37497	2	13711
37497	2	22788
37497	2	11177
37497	2	33010
2013	0	35742
19980	3	36898
17831	0	37505
33246	0	37743
36427	0	14560
36427	2	10538
36427	2	23040
36427	2	22295
36427	2	19757
36427	2	24064
36427	2	16377
36427	2	798
36427	2	22824
36427	2	18752
36427	2	2820
36427	2	17406
36427	2	14102
36427	2	23480
36427	2	30404
36427	2	21167
36427	2	29735
36427	2	3975
36427	2	14047
36427	2	208
36427	2	32843
36427	2	18083
36427	2	31616
36427	2	26885
36427	2	9464
36427	2	16473
36427	2	29370
36427	2	16121
36427	2	6678
36427	2	32506
36427	2	30155
36427	2	14918
36427	2	5025
36427	2	19363
36427	2	31869
36427	2	18396
36427	2	28636
36427	2	17399
36427	2	3544
36427	2	18489
36427	2	3968
36427	2	9807
36427	2	25482
36427	2	17090
36427	2	18142
36427	2	25363
36427	2	25418
36427	2	29964
36427	2	21152
36427	2	25015
36427	2	853
36427	2	25275
36427	2	19350
36427	2	32111
36427	2	30563
36427	2	25308
36427	2	17118
36427	2	30442
36427	2	29014
36427	2	18904
36427	2	77
36427	2	16140
36427	2	33714
36427	2	33959
36427	2	5358
36427	2	3460
36427	2	30410
36427	2	971
36427	2	4597
36427	2	33227
36427	2	9094
36427	2	24437
36427	2	12718
36427	2	24992
36427	2	25851
36427	2	7883
36427	2	26407
36427	2	7912
36427	2	1266
36427	2	8944
36427	2	20505
36427	2	14499
36427	2	32377
36427	2	8064
36427	2	8375
36427	2	21126
36427	2	26063
36427	2	18166
36427	2	9401
36427	2	25028
36427	2	18941
36427	2	24682
36427	2	24333
36427	2	34144
36427	2	5150
36427	2	18039
36427	2	33471
36427	2	15333
36427	2	28253
36427	2	21650
36427	2	30245
36427	2	26192
36427	2	25826
36427	2	6638
36427	2	587
36427	2	11466
36427	2	33221
36427	2	31588
4459	0	36578
20758	0	37435
28145	0	36232
36122	0	26400
35310	6	13243
35051	0	15157
35051	3	9034
35078	2	3548
943	0	37743
21781	8	37724
32929	0	35812
32929	2	35542
36077	0	5366
36077	1	1321
32439	2	37512
36257	3	10836
36257	6	16874
36257	6	1542
36257	6	20167
36257	6	5063
36257	6	18728
36257	6	16954
34710	6	16661
34710	6	15345
34710	6	20312
34710	6	15089
34710	6	27473
13011	0	36945
32993	0	35028
34714	2	27374
34714	2	22035
34714	2	15884
956	2	37153
31290	4	36118
3393	0	37184
35022	2	12128
35022	2	13851
35022	2	34289
35022	2	20967
35022	2	29224
35022	2	27954
35022	2	33975
35022	2	24752
35022	2	3172
35022	2	20083
35022	2	31877
35022	2	8473
35022	2	1984
15588	0	35676
3174	7	35228
37077	2	10704
37077	2	26247
37077	2	6542
37077	2	25620
36978	2	29429
36978	2	33914
36978	2	25793
36978	2	18016
36978	2	26339
36978	2	17971
36978	2	24379
36978	2	21342
36978	2	7103
37090	2	8784
37090	5	32625
37090	2	21835
37090	5	7897
35761	6	25379
35761	6	11335
35761	6	23720
35761	6	4614
36212	0	6699
36212	2	21257
36212	2	20234
36212	2	443
36212	2	31881
36212	2	26331
19805	0	37315
35006	0	1214
19011	0	35590
33274	0	37743
1384	8	36538
1384	4	35071
4891	0	37639
35388	2	14162
36629	3	31943
29553	0	37935
18468	0	37656
34927	4	25650
34927	4	24355
36266	6	7986
26048	0	35105
37217	2	2184
37217	2	28887
37217	2	24097
21173	5	34689
37853	2	31231
37853	2	7952
37853	2	5658
37853	2	11660
37853	2	1506
37853	2	20405
37853	2	6851
37853	2	11275
5648	2	37343
5648	2	36406
5648	2	35079
8454	0	34636
8683	0	37808
8683	1	35036
35989	0	13996
35989	3	28655
30433	4	37922
30433	5	37574
4934	2	35604
10640	1	35569
24642	2	36346
27696	1	35339
36379	1	5418
36379	1	6232
36379	2	31874
29007	4	36604
18376	0	36053
22794	0	36052
17530	0	36946
36712	2	28840
37302	0	14017
37302	4	19052
37302	2	12421
37302	2	20402
37302	2	27799
37302	2	2748
37302	2	30905
37302	2	19460
37302	2	14392
37302	2	9047
37302	2	25712
37302	2	6492
37302	2	2728
37302	2	1536
37302	2	21234
37302	2	834
37302	2	9837
37302	2	7586
37302	2	4805
37302	2	27992
37302	2	27944
37302	2	26172
37302	5	32640
37302	2	19542
37302	2	27293
37302	2	5224
37302	2	33049
37302	2	30566
37302	2	5475
37302	2	9213
37302	2	13058
37302	2	4877
37302	5	13399
37302	2	17786
37302	5	32667
37302	5	23534
37302	2	1431
37302	2	17286
37302	2	8967
37302	2	9359
37302	2	25636
37302	2	16735
37302	2	29928
5630	0	35136
35415	6	23824
26323	0	37376
26323	3	36814
36982	0	29486
36982	2	29758
36982	2	19965
36982	2	31939
36982	2	29836
15737	0	37078
9011	0	34962
9011	1	35106
34646	6	16085
34646	6	15896
34646	6	27823
34646	6	13390
34646	6	1879
34646	6	17020
34646	6	14195
17512	3	36814
36175	0	19905
36175	6	20936
36491	0	6264
36357	0	8612
22298	0	35770
22298	1	35569
2363	0	37149
34709	2	3246
34709	2	33984
36908	2	18563
36908	2	1739
36908	2	14424
12832	0	36627
34766	4	20982
34766	5	27325
34766	5	22214
34766	5	25913
34766	5	13249
34766	5	32443
34766	5	7764
34766	5	23972
34766	5	10548
34766	5	13191
34766	5	32797
34766	5	34343
34766	5	18156
34766	5	13267
34766	6	4443
10937	4	36675
10937	1	34718
15917	0	36588
18849	0	37305
34157	0	35377
27373	0	37229
35158	2	2858
35158	2	8717
10328	0	35136
37342	0	5966
37342	5	17859
37342	2	7666
37342	2	8072
12701	0	37435
35762	0	31387
9511	3	36040
28677	0	35717
28677	6	37164
24734	8	36538
24734	4	35849
15538	1	35560
36100	2	32901
36100	2	13373
36100	2	32689
36100	2	8948
36100	2	25174
36100	2	13468
36100	2	8141
36100	2	6248
36100	2	23389
36100	2	13272
36100	2	18796
36100	2	15639
36100	2	4365
36100	2	15601
36100	2	14976
36100	2	21149
36100	2	22216
36100	2	30878
36100	2	597
36100	2	9881
27110	0	35780
842	0	35599
36582	2	12015
14718	1	37839
35170	3	8892
35170	6	21770
28322	1	36922
4201	7	34697
4201	1	37584
7563	9	37234
22287	0	37820
22287	3	36478
13432	8	36538
7373	0	34707
27634	8	35904
1080	0	35938
36600	2	12328
15858	0	34874
15858	3	34654
21876	8	36538
21876	4	35391
21740	1	35883
37710	0	18045
37710	2	15525
15921	4	36736
10020	8	36538
37344	2	3901
18144	0	35605
3819	0	34898
9411	0	36001
9411	3	34609
35572	3	1884
35572	6	29311
35572	6	5437
35572	6	16000
25478	0	36719
25478	3	35176
37969	1	20061
10419	8	36548
20586	3	37345
36200	0	20492
36200	6	15516
36200	6	20806
36200	6	8133
36200	6	33890
36200	6	15629
36200	6	13037
10073	2	37351
33181	0	37639
33181	6	35608
25767	0	36449
25767	3	34723
22101	2	37224
20526	2	36686
31391	8	36856
31391	4	36022
12408	0	37698
36951	0	24917
36951	9	5961
36951	9	24662
36951	9	9597
36951	9	31340
36951	9	20925
36951	5	17822
36951	9	10713
36951	9	32643
36951	9	21860
36951	9	4903
36951	9	2770
36951	9	18663
36951	9	5014
36951	9	25710
36951	9	25731
36951	9	16593
36951	9	13364
36951	9	25385
36951	9	16454
36951	9	5575
36951	9	14931
36951	9	15362
36951	9	4766
36951	9	25675
37699	0	5124
36273	2	29590
36273	2	31458
20821	8	36538
1537	0	37036
5590	0	34764
5590	3	35845
37299	2	34230
37299	2	9774
34712	4	2288
34712	2	9515
36638	2	4549
28547	0	36803
36859	0	22085
35623	6	1668
35623	6	4825
35623	6	8873
35623	6	8682
35623	6	33939
35623	6	12930
35623	6	30975
35623	6	3417
35623	6	28448
19578	0	36719
35019	3	7968
35019	6	13960
35019	6	32947
10190	0	37639
37882	0	27059
37882	2	28577
35720	0	6670
35720	2	13112
36572	2	20726
36572	2	6348
1885	1	35560
31402	4	35499
9274	0	36578
4059	4	36396
13471	0	37376
10580	0	35938
10580	2	34665
34809	2	7768
34809	2	22654
34809	2	16896
34809	2	10726
34809	2	12206
34809	2	5253
34809	2	23132
34809	2	20881
34809	2	21380
34809	2	26117
35281	2	4214
35281	2	4051
37184	0	20889
37184	2	7372
37184	2	5154
37184	2	27873
37184	2	31407
37184	2	28400
37184	2	12490
37184	2	27698
37184	2	24443
37184	2	8307
37184	2	21643
37184	2	29551
37184	2	33248
37184	2	27369
37184	2	3393
37184	2	906
37184	2	21934
37184	2	27514
1881	0	37743
35823	6	33662
6027	1	37552
37035	6	6234
37035	6	720
37035	6	5089
37035	6	33614
37035	6	23081
37035	6	9478
37035	6	13146
37035	6	32605
37035	6	19769
37035	6	23593
37035	6	536
37035	6	2399
37035	6	17167
37035	6	15529
37035	6	33999
37035	6	1737
37035	6	24373
22845	0	37640
36253	0	30974
3262	9	36174
27276	9	35866
27276	9	36777
34675	2	15035
27642	0	35185
5932	0	36719
34704	6	4526
34704	6	28521
34704	6	11067
34704	6	27638
25172	3	36457
19622	0	37337
19622	3	37810
11406	2	36939
554	8	37323
20412	0	37376
20412	3	36814
36761	0	5336
36761	4	10653
36761	2	20265
36761	2	7780
36761	5	20814
32859	4	35501
32516	0	34874
32516	6	37977
37367	8	9017
35427	2	2827
35427	2	30099
35427	2	7544
35427	2	155
35427	2	23311
35427	2	11258
35427	2	3642
23703	1	35560
16864	0	35676
35541	2	6985
22129	0	35242
32844	2	36029
35176	6	6754
35176	6	25478
26445	0	35676
26445	1	35569
36308	0	16156
35844	0	17522
35297	2	19195
35297	2	30357
35297	2	122
35012	4	4266
2963	0	34801
2963	3	37903
37185	4	15168
29283	3	37167
36376	5	7668
25933	0	35545
6355	0	36454
[truncated: 36,285 more rows]
