# Supplementary material
Source: ML conference proceedings conference paper supplement (https://proceedings.neurips.cc/paper_files/paper/2021/hash/0fd600c953cde8121262e322ef09f70e-Abstract.html)
Supplement: Supplementary file 1 [file 0fd600c953cde8121262e322ef09f70e-Supplemental.zip › Supplementary_Material_Paper_8745/data/Hamaguchi-BM_both-3000/test/test-random-sample/test0.txt]

37705	0	37801	1
30439	9	32610	0
37549	2	36299	1
5248	9	36403	0
37220	2	36370	1
32234	5	4605	0
35926	0	34619	1
32408	9	35648	0
37071	6	37492	1
28427	6	6240	0
37071	6	37233	1
23518	0	4433	0
37071	2	37824	1
17545	8	37322	0
37071	6	35341	1
30439	9	10955	0
37071	6	34753	1
12188	7	6187	0
37071	6	36560	1
1333	10	36074	0
37071	6	37193	1
5248	0	21802	0
37071	6	36256	1
32408	3	13164	0
37071	6	37306	1
1678	6	10038	0
37131	8	36838	1
30928	4	26230	0
35559	0	34898	1
7683	7	6187	0
35559	6	35364	1
30439	0	30905	0
36523	0	36682	1
9256	7	29835	0
36523	3	35987	1
10335	10	28763	0
34741	9	36177	1
8703	7	32610	0
34644	6	35080	1
8922	1	28427	0
36187	6	36167	1
37322	8	28211	0
36027	0	36802	1
15169	2	10335	0
37621	0	37746	1
6240	1	10182	0
37621	2	36225	1
30027	0	34451	0
34965	5	37568	1
20623	2	36059	0
34965	5	36383	1
12188	4	34770	0
34965	5	36252	1
18623	7	25859	0
37039	4	36609	1
16163	0	32610	0
37153	1	34941	1
34798	9	10669	0
34865	4	36960	1
25407	1	16040	0
36577	3	37165	1
20834	1	33298	0
36657	0	37857	1
1678	8	6240	0
35490	2	35668	1
15169	4	27741	0
35256	2	36742	1
4433	3	28211	0
35256	2	37767	1
15882	0	24489	0
36724	1	37946	1
34588	8	35648	0
36471	0	37257	1
25604	10	36403	0
36471	2	36706	1
17545	3	37630	0
36471	2	36333	1
10182	7	28510	0
37099	0	37780	1
2126	1	26230	0
36653	5	35964	1
34819	2	25	0
36479	4	35942	1
5248	0	34798	0
37285	1	37885	1
4685	7	31334	0
34961	3	34907	1
29835	2	12079	0
37839	9	34648	1
12188	6	23518	0
37025	0	36719	1
37122	6	30027	0
36374	0	35978	1
37322	6	28427	0
36374	3	36697	1
34798	7	34451	0
36374	6	35358	1
32408	9	15934	0
35319	1	37938	1
21808	0	12188	0
35105	0	34743	1
32610	7	32610	0
37796	6	35046	1
2126	6	31334	0
34731	2	36231	1
34679	9	28211	0
34731	2	36911	1
5248	7	24935	0
34731	2	37936	1
28763	3	15198	0
34731	2	36442	1
31334	9	17220	0
34731	2	37383	1
12079	4	10796	0
34731	2	36720	1
27741	6	30928	0
34731	2	35179	1
10796	4	35752	0
37622	0	35717	1
8703	5	31334	0
37004	1	37252	1
30928	5	32408	0
36635	2	34647	1
28427	2	24489	0
34995	2	37811	1
27741	4	30905	0
35977	3	36153	1
31119	2	21802	0
35893	6	37582	1
26230	4	35752	0
35893	6	36458	1
1333	6	12188	0
35893	6	35777	1
16163	4	1678	0
35893	6	35845	1
30905	2	2126	0
35893	6	36987	1
10182	6	12579	0
37360	0	34975	1
25	9	18579	0
36245	0	36640	1
24662	0	10796	0
35644	2	34911	1
27741	0	36074	0
37415	3	37190	1
35707	9	12079	0
36591	0	37698	1
36403	0	30905	0
35095	6	35639	1
36598	3	20623	0
37719	2	34578	1
21802	4	2126	0
35377	2	34856	1
2482	6	7683	0
35377	2	37957	1
4433	2	30439	0
35377	2	35151	1
6187	8	28763	0
35377	2	35540	1
37630	0	30061	0
35377	2	35289	1
12079	4	37630	0
36501	2	37179	1
35707	2	24935	0
37939	2	35006	1
6187	3	20554	0
37553	0	36802	1
15934	0	34798	0
35513	3	35788	1
13201	3	10669	0
36616	3	37088	1
30905	6	15934	0
36348	0	36604	1
32234	9	37630	0
36046	2	37908	1
37322	10	5757	0
35462	3	35393	1
24193	5	10038	0
35462	6	37132	1
2126	2	37322	0
35462	6	34855	1
27741	6	20834	0
35462	6	37500	1
7683	3	5757	0
35462	6	35816	1
15934	1	12188	0
35462	6	35704	1
17545	8	33298	0
35462	6	36457	1
21808	4	10182	0
35462	6	35157	1
36403	6	4685	0
35462	6	35454	1
20834	0	20554	0
35462	6	35746	1
29835	1	34588	0
35462	6	35020	1
30082	1	31119	0
37375	0	35907	1
17220	3	23793	0
35353	2	35014	1
34679	6	20834	0
34854	0	36578	1
23793	3	10669	0
35192	0	37849	1
25859	7	1678	0
36011	0	37408	1
12188	8	30061	0
37681	6	36359	1
10669	6	28763	0
35499	5	37963	1
6768	4	4308	0
35499	9	37498	1
27741	2	5757	0
35314	2	36042	1
12579	5	36403	0
35314	2	35399	1
10669	0	33298	0
35121	3	34842	1
23518	10	17220	0
37107	0	35635	1
5248	4	30439	0
37107	1	34881	1
28763	8	267	0
35198	2	35588	1
32234	3	28763	0
37649	5	34825	1
10796	2	24489	0
35671	4	37152	1
585	6	16163	0
35387	2	36767	1
5248	7	23793	0
35092	6	36862	1
37322	10	10796	0
35092	6	36611	1
20554	10	28763	0
36037	4	37910	1
37630	6	20834	0
36292	0	36232	1
18967	8	29835	0
37504	1	35569	1
24935	3	4605	0
35858	0	35180	1
13164	2	15198	0
35250	0	35147	1
5757	7	36403	0
36712	0	36762	1
35752	0	35752	0
35018	4	36683	1
6187	4	8703	0
35687	6	36443	1
16163	5	13164	0
37759	3	35834	1
35707	8	25859	0
35981	0	35541	1
21061	4	24193	0
36410	0	37415	1
37122	10	30439	0
37638	8	34653	1
32234	5	12079	0
37638	1	35991	1
13164	9	20623	0
36361	0	36719	1
23518	7	30027	0
36361	3	37929	1
29835	6	12188	0
37495	2	37626	1
1333	0	34798	0
37495	2	35512	1
12188	6	30439	0
34769	0	37361	1
36803	3	24193	0
37918	2	35808	1
35752	1	10335	0
36898	0	35857	1
4433	1	34770	0
36909	4	36316	1
21061	5	37122	0
35908	0	37324	1
33737	9	36059	0
36512	2	36046	1
7683	10	12579	0
35563	0	36232	1
36403	9	17220	0
35805	0	36709	1
26230	4	12767	0
37754	8	34879	1
12767	5	267	0
37754	5	36073	1
16040	6	1678	0
37010	2	36103	1
30082	3	15318	0
36053	2	36026	1
28510	0	9256	0
36053	2	37730	1
13164	4	30061	0
37167	0	37640	1
36074	9	12767	0
37167	6	37863	1
34819	9	37630	0
36957	2	37832	1
34770	9	4308	0
36994	6	36897	1
12188	5	8922	0
36403	4	36403	1
36403	3	26230	0
35008	6	34717	1
30439	7	12079	0
36160	4	36182	1
18967	6	24935	0
35526	0	36674	1
34679	6	37122	0
35318	0	36547	1
32234	9	36403	0
35147	2	37880	1
37630	6	18623	0
35147	2	34687	1
28763	3	30439	0
34740	0	37718	1
30905	5	20834	0
37744	3	36981	1
12188	4	21808	0
35636	1	37218	1
4433	6	36074	0
34960	2	37015	1
975	3	8922	0
34960	2	36137	1
35752	9	267	0
34960	2	37734	1
23793	6	5248	0
35998	9	37454	1
267	9	5248	0
36880	1	37798	1
29835	4	8703	0
35238	4	37048	1
20623	1	36403	0
35099	9	36405	1
34451	3	24662	0
35099	9	37844	1
20623	0	21808	0
35099	9	35926	1
8922	8	24489	0
36488	5	35524	1
4105	4	32234	0
34690	3	36414	1
35707	10	34819	0
36435	5	36051	1
21061	1	32408	0
36759	5	35327	1
28763	8	1333	0
34579	2	34847	1
4308	10	10182	0
34904	9	36575	1
7683	6	37630	0
36207	0	37536	1
18579	8	10669	0
37891	0	37147	1
27741	7	23518	0
35414	5	35136	1
8703	2	8922	0
36746	8	36548	1
20554	10	21061	0
36293	5	35757	1
30905	8	7683	0
34928	0	36719	1
13164	6	34770	0
36843	0	36719	1
24489	5	12079	0
36807	0	35465	1
26230	8	20623	0
34805	2	36941	1
15318	5	30928	0
37013	3	37682	1
25604	0	36059	0
35913	4	37563	1
1333	1	10038	0
35913	3	36782	1
24935	2	2126	0
35913	5	36822	1
21808	10	37630	0
35913	5	35982	1
30905	9	21802	0
36281	0	37348	1
32610	8	16040	0
37914	0	35226	1
15882	7	8922	0
34964	6	34860	1
25407	2	6768	0
34632	4	36032	1
32234	10	15882	0
36437	0	35207	1
37630	0	28510	0
35603	0	35405	1
2482	10	36403	0
37760	0	34836	1
24193	5	267	0
35693	2	35518	1
28427	9	31119	0
37542	2	36056	1
12579	10	10182	0
37542	2	37726	1
36598	1	23518	0
37579	0	36682	1
16040	0	24489	0
35682	6	37318	1
27741	6	2126	0
35544	4	37894	1
28427	8	10796	0
35544	6	37433	1
28510	2	12579	0
34642	3	36531	1
32408	3	2482	0
34642	2	35578	1
6768	10	15934	0
34642	9	36162	1
20623	5	32234	0
35283	2	37629	1
20623	4	34819	0
35873	3	37298	1
4433	2	6187	0
37056	2	36001	1
4105	7	36403	0
37056	2	37920	1
32234	6	4433	0
37927	2	35062	1
30905	8	2126	0
36013	9	36780	1
5757	8	15934	0
34691	0	35392	1
36403	4	975	0
37369	6	35640	1
267	8	4308	0
35467	0	36116	1
23793	10	15198	0
35467	2	35303	1
24935	6	30439	0
35467	2	35669	1
37630	5	34770	0
35467	2	35844	1
15882	2	10335	0
37177	0	36682	1
34819	5	25859	0
36334	0	35032	1
34471	2	975	0
36334	2	37778	1
4605	2	36598	0
36014	2	36500	1
12767	8	5248	0
37702	0	37138	1
7683	2	24489	0
36268	0	36682	1
36074	4	26230	0
34887	0	34898	1
5757	4	5757	0
37303	0	37698	1
25604	10	37122	0
37303	3	36127	1
15934	9	18579	0
37271	1	36224	1
34679	6	15198	0
37497	2	37442	1
34588	1	6187	0
37497	2	35484	1
10335	2	21808	0
36427	2	34884	1
15882	3	12079	0
36427	2	34943	1
30905	7	32408	0
36427	2	36667	1
10182	7	25859	0
36427	2	36279	1
7683	7	17220	0
36427	2	37374	1
31334	2	15318	0
36427	2	36015	1
24193	4	4105	0
36427	2	37038	1
34679	3	4605	0
36427	2	37388	1
36403	5	8922	0
35310	0	36682	1
12579	3	35752	0
35078	0	34734	1
36059	3	12767	0
36077	4	36619	1
585	7	24193	0
36257	0	36682	1
28427	10	36059	0
36257	6	34666	1
18967	3	10335	0
36257	6	36899	1
37630	10	23518	0
34710	6	37346	1
30905	8	21061	0
34710	6	36234	1
9256	8	36059	0
34710	6	36054	1
6187	2	37122	0
34714	0	34602	1
6240	4	1333	0
35022	2	34637	1
18579	6	25604	0
35022	2	36454	1
34471	2	15934	0
35022	2	35824	1
2126	5	34588	0
37077	2	35997	1
13201	4	35752	0
36978	2	36692	1
36059	10	6187	0
37090	2	35203	1
15198	4	15882	0
35761	6	35448	1
21808	1	30061	0
36212	3	37808	1
37630	1	7683	0
35388	0	37341	1
1678	6	17220	0
36629	5	37712	1
21061	1	585	0
34927	8	35215	1
13201	5	37630	0
36266	3	34649	1
24935	1	35648	0
37853	2	37082	1
34588	0	10335	0
36379	1	34853	1
33298	2	10335	0
37302	4	34952	1
34819	10	10955	0
37302	2	36949	1
2482	0	15882	0
37302	2	36298	1
30928	2	28510	0
37302	5	36984	1
20554	0	34819	0
37302	5	35423	1
34471	5	26230	0
35415	3	34658	1
16040	3	36803	0
34646	6	36715	1
34471	6	12079	0
36175	6	35663	1
13164	7	2126	0
36908	0	37324	1
34679	9	25859	0
36908	2	36945	1
32408	1	4685	0
34766	3	37646	1
7683	7	36403	0
35158	0	37221	1
8703	6	30905	0
37342	4	36255	1
33737	3	31119	0
36469	0	37463	1
1678	8	37630	0
36582	0	34784	1
34471	0	10669	0
35170	0	35621	1
34588	0	34588	0
34694	1	35748	1
24662	1	8922	0
36600	0	34719	1
25	5	4308	0
37710	2	35164	1
10335	4	28211	0
37344	0	36417	1
28427	3	6240	0
35572	0	36578	1
10038	8	23793	0
35572	6	36810	1
30061	6	6768	0
35572	6	35768	1
23793	4	37322	0
36200	6	34766	1
2126	9	12188	0
36273	0	36103	1
20834	4	10955	0
37515	2	35375	1
34819	8	32408	0
37299	2	37299	1
36074	3	34770	0
34712	0	37971	1
36598	6	585	0
36638	0	36567	1
18967	1	4433	0
36859	4	34656	1
30439	0	35648	0
35623	6	35749	1
4308	2	6187	0
35623	6	37307	1
35707	3	25	0
35019	0	35282	1
10955	4	34588	0
37882	2	35123	1
35707	6	36403	0
35720	2	35747	1
15318	8	36803	0
36572	0	37386	1
23518	4	15198	0
36572	2	34789	1
4308	1	30439	0
34809	2	36210	1
5248	4	23518	0
34809	2	35289	1
20554	8	1678	0
34809	2	37134	1
34819	2	29835	0
34809	2	34700	1
12767	5	32408	0
34809	5	35072	1
34819	0	20623	0
34809	2	35953	1
36598	5	36598	0
35281	0	36905	1
30027	4	10182	0
37184	2	36588	1
10038	10	21061	0
37184	2	37435	1
15198	3	34451	0
35823	0	36232	1
25604	9	29835	0
37035	6	36301	1
4308	2	26230	0
37035	6	36576	1
15198	2	26230	0
37035	6	36626	1
34819	10	31334	0
37035	6	35425	1
17545	1	37122	0
34704	6	36395	1
32610	6	12188	0
36761	4	36135	1
34770	2	36598	0
35427	0	36853	1
23793	3	15882	0
35297	3	36996	1
35752	8	17220	0
35012	4	36686	1
21808	8	12579	0
37185	4	35106	1
30439	7	8703	0
36376	0	35301	1
17545	3	18623	0
36674	0	35833	1
5757	0	4308	0
35852	2	36198	1
32610	8	20554	0
35852	2	37283	1
35752	6	12188	0
35852	2	35299	1
36598	9	18967	0
35852	2	35397	1
13164	7	15934	0
35852	2	36525	1
13164	8	34679	0
35852	2	37079	1
24489	3	34471	0
35852	2	34951	1
36074	4	13164	0
35852	2	36557	1
30928	8	18623	0
35852	2	37031	1
30439	6	28763	0
35852	2	36677	1
34679	2	28211	0
37533	0	36904	1
15198	5	30905	0
35187	2	36800	1
26230	8	10335	0
37200	3	35006	1
4605	2	15169	0
35408	9	36081	1
267	7	29835	0
35408	9	35446	1
15934	2	12468	0
37244	5	35208	1
12468	5	30061	0
35285	2	37091	1
24193	8	30928	0
35290	2	37159	1
6768	7	4308	0
35290	2	35829	1
4433	10	2482	0
35290	2	37642	1
26230	10	37630	0
35742	0	37289	1
10335	10	31334	0
36580	8	35009	1
12579	8	34451	0
35686	3	36804	1
6240	9	6768	0
34636	2	36786	1
585	6	34819	0
36195	2	36407	1
585	3	18967	0
35129	3	36028	1
34770	0	585	0
35101	6	35809	1
7683	4	32234	0
36529	2	37883	1
34471	4	34770	0
36529	2	34797	1
34679	10	33737	0
37810	0	35717	1
20834	10	29835	0
35390	2	36130	1
37630	7	34588	0
35390	2	36985	1
15318	10	8703	0
37783	0	36154	1
30027	9	37122	0
34896	0	35907	1
24935	6	34770	0
34896	3	37491	1
15318	7	36403	0
34942	6	35950	1
24193	6	30439	0
34942	6	36608	1
33298	5	24489	0
36836	0	37640	1
23518	9	15169	0
36836	3	36206	1
27741	4	34471	0
35712	2	35951	1
37322	4	12468	0
35678	4	34965	1
32408	9	4605	0
35678	5	35664	1
12188	9	20554	0
35678	5	35583	1
27741	5	8922	0
37652	4	35461	1
21061	7	16040	0
36765	4	35382	1
10182	4	29835	0
36765	5	35495	1
24935	9	25604	0
34834	5	36077	1
35707	9	30439	0
35918	2	36424	1
34588	4	36059	0
35426	2	37267	1
37630	5	10335	0
36544	2	37033	1
1333	7	1678	0
36866	0	35055	1
36803	9	34471	0
35662	3	36200	1
23518	5	18579	0
35662	10	37684	1
30061	4	585	0
35662	5	36416	1
20623	6	33737	0
35802	0	34905	1
13201	2	17545	0
37928	0	36232	1
13164	2	12767	0
37707	4	36237	1
8703	5	8703	0
36448	0	37480	1
5248	7	25859	0
36290	5	36870	1
24662	3	24489	0
37310	3	36637	1
34798	6	4105	0
35778	5	37092	1
975	9	36403	0
35515	3	37071	1
4308	4	37122	0
37319	2	36106	1
15318	4	31334	0
36132	8	34804	1
10796	10	8703	0
36707	2	34876	1
18579	6	4605	0
35795	0	35990	1
12468	7	32610	0
36380	0	35978	1
37122	9	15934	0
36444	3	37382	1
24662	4	6187	0
36258	0	35860	1
4105	6	23793	0
35839	0	37438	1
29835	8	34770	0
37115	0	36562	1
6240	4	7683	0
37214	4	35380	1
35648	5	16163	0
37214	5	37921	1
33737	8	20554	0
35397	6	37353	1
33737	1	7683	0
37130	1	35883	1
15934	8	1333	0
36453	0	36886	1
30905	0	34451	0
36453	5	37051	1
28510	7	12188	0
34780	0	35247	1
35707	0	1333	0
37203	0	37750	1
32408	5	33298	0
35150	0	37611	1
1333	1	12079	0
36604	0	36528	1
29835	10	5248	0
35591	3	36656	1
28510	10	34819	0
37538	2	37296	1
35707	10	12767	0
34786	8	37724	1
10038	0	12767	0
34786	5	36368	1
17545	9	20623	0
37829	2	37253	1
34798	4	32408	0
37829	2	36936	1
4308	1	10182	0
34707	2	36145	1
35648	0	17220	0
34707	2	36204	1
21061	1	1333	0
37150	0	37743	1
10796	4	34451	0
35137	3	34583	1
12579	9	21802	0
37322	2	37012	1
17220	9	17220	0
36397	2	37769	1
30027	6	30082	0
34951	3	36017	1
18623	10	10038	0
37653	1	34808	1
4308	1	585	0
36569	2	35545	1
10182	1	36803	0
36569	2	36143	1
23518	2	10335	0
37339	0	35907	1
18579	2	30439	0
36328	3	37209	1
10669	4	18623	0
36328	6	34644	1
17545	9	13201	0
36328	6	36850	1
2126	7	1333	0
36328	6	35935	1
20623	4	1678	0
36587	0	34668	1
28427	3	4105	0
36992	0	37487	1
23793	2	12079	0
36347	0	35575	1
8703	4	12767	0
37840	2	36752	1
267	9	10955	0
35921	0	36578	1
4685	6	12767	0
37287	3	36076	1
30027	1	17545	0
34604	5	35855	1
34798	10	36403	0
34604	5	34756	1
1678	9	18967	0
35538	0	37640	1
30928	9	21802	0
34749	2	37312	1
15882	2	6240	0
36280	2	36955	1
23518	0	27741	0
36690	8	34879	1
18967	9	8703	0
36690	5	36073	1
10182	10	12079	0
36690	5	35996	1
9256	8	28763	0
37334	2	34699	1
5757	0	26230	0
36550	5	37240	1
7683	2	34451	0
37057	0	36303	1
18579	9	36598	0
34878	2	37561	1
15198	6	35648	0
36717	6	36967	1
37630	8	25859	0
34875	0	34963	1
25604	9	37322	0
34615	3	37462	1
10796	7	5248	0
34615	6	37076	1
27741	2	6187	0
36381	0	37496	1
34770	7	31119	0
34783	3	37311	1
10955	0	17545	0
34783	6	35598	1
35648	4	30027	0
34783	6	37809	1
34471	9	5248	0
36697	6	36374	1
6187	9	12188	0
36697	6	35961	1
15198	9	15198	0
36499	0	34749	1
8922	10	16163	0
35094	2	37334	1
37122	5	31334	0
37782	2	37551	1
16163	4	6240	0
37782	2	37757	1
27741	0	10182	0
35113	6	36643	1
8922	8	15169	0
36389	0	36465	1
18579	7	34819	0
36389	2	37696	1
16040	1	6240	0
36389	2	37028	1
30439	5	13164	0
34662	3	34726	1
33737	0	28427	0
37174	2	35916	1
36403	2	1678	0
36595	2	34995	1
34588	9	975	0
34734	2	37188	1
2126	2	6240	0
37889	2	37901	1
30027	10	4685	0
35061	2	35930	1
8922	2	15318	0
37427	0	36188	1
35707	2	34770	0
36458	6	37416	1
33298	4	36059	0
36070	0	35852	1
15318	1	35707	0
36426	3	35536	1
18623	4	21808	0
37007	6	36196	1
18579	1	1333	0
35500	4	37152	1
31334	7	18579	0
35361	2	37137	1
12767	7	5248	0
35361	2	37089	1
15882	2	37122	0
35219	5	35585	1
20554	7	5757	0
34633	2	34975	1
18967	8	5248	0
36475	0	36824	1
34471	8	20554	0
36764	3	36797	1
20834	0	4105	0
35028	2	35043	1
37630	8	2482	0
35028	2	36563	1
30027	1	15934	0
35028	2	34640	1
15318	4	34588	0
35803	0	35960	1
16040	6	15934	0
35141	0	35731	1
12579	6	28427	0
35522	2	36929	1
31334	8	5757	0
36495	3	36439	1
20834	8	16163	0
37223	0	36778	1
4433	10	24935	0
36605	5	36285	1
32234	9	30061	0
36605	5	35220	1
6768	9	2126	0
36605	10	37687	1
12079	10	21802	0
37643	3	36966	1
32610	7	31334	0
35798	0	37607	1
4105	4	24935	0
34807	0	36934	1
30082	10	30905	0
37005	0	36896	1
36059	1	13201	0
37437	4	37059	1
24935	4	15318	0
35449	0	36469	1
23518	9	12767	0
36551	0	37709	1
6187	1	8703	0
36551	5	34800	1
30061	4	30928	0
36679	0	37895	1
37322	9	28763	0
36679	0	37720	1
24935	7	17220	0
37659	6	37111	1
20834	10	13164	0
37170	6	36039	1
25	6	10955	0
37627	2	34734	1
8703	5	18579	0
37627	2	35681	1
31119	9	23793	0
37627	2	35684	1
32234	7	34451	0
37046	0	35632	1
7683	8	34819	0
37046	2	37455	1
30082	2	21808	0
37046	2	35142	1
4605	8	20834	0
37046	2	36913	1
28427	0	36403	0
37046	2	36055	1
13164	1	25407	0
37046	2	37330	1
10669	9	34679	0
36368	5	34727	1
20623	4	21808	0
36368	5	36434	1
24489	3	20623	0
36368	5	35184	1
18623	0	31334	0
36368	5	36468	1
13201	9	33737	0
36218	0	36708	1
36403	0	35707	0
36120	2	36233	1
30061	3	2126	0
36120	2	34575	1
28211	5	28211	0
36478	6	36217	1
15198	8	1333	0
35033	3	36028	1
36059	2	36059	0
34596	5	34595	1
4685	7	20834	0
36481	1	37584	1
1678	6	36074	0
36827	3	35845	1
18579	4	30439	0
36082	0	37698	1
13201	1	15198	0
34594	0	35103	1
28510	7	2482	0
34594	9	37576	1
4308	10	28211	0
34594	9	36506	1
34451	9	36598	0
36235	0	37789	1
12079	0	32234	0
37728	5	35739	1
30027	4	10038	0
35445	2	37029	1
35752	7	36803	0
35445	2	35132	1
28763	1	34451	0
37451	0	36493	1
35648	2	21808	0
37084	6	37434	1
2482	7	35648	0
35037	2	37507	1
31119	8	9256	0
37207	2	36622	1
15882	5	10038	0
36096	4	37910	1
30082	9	13201	0
35391	5	35502	1
37122	10	267	0
35391	10	35699	1
32234	10	4105	0
35573	0	35525	1
34588	5	30061	0
36664	0	36803	1
24935	2	4605	0
35548	0	35938	1
23793	1	24489	0
35548	2	36857	1
30439	4	20834	0
35690	0	36312	1
267	0	21061	0
35602	0	36043	1
35707	0	28763	0
36276	0	35197	1
29835	0	21802	0
37072	3	36028	1
26230	7	20834	0
34924	5	37572	1
34679	0	37630	0
36687	6	36680	1
2126	4	15198	0
37735	0	37658	1
36059	0	32234	0
37735	2	35649	1
25	0	25407	0
36999	3	35764	1
8703	3	28427	0
37850	0	36274	1
12079	3	1678	0
37850	2	37666	1
585	4	6187	0
36375	0	35032	1
24193	8	35707	0
36700	3	34748	1
15882	0	29835	0
34752	0	37361	1
30061	6	6187	0
35171	1	35036	1
25859	10	20834	0
37854	0	36429	1
37122	10	26230	0
37854	2	35395	1
12579	8	10335	0
36060	3	37951	1
4308	9	21802	0
37027	3	35153	1
31119	10	12579	0
34813	0	34703	1
34588	9	17545	0
34713	0	37376	1
36598	4	17220	0
35403	0	34764	1
32610	5	18623	0
35403	3	35845	1
10796	4	25604	0
37112	0	36035	1
25407	2	18967	0
37112	4	34601	1
8922	1	34451	0
34840	0	34806	1
34679	7	15882	0
36152	2	36785	1
25604	4	18579	0
36152	5	35252	1
30061	7	10955	0
36959	0	35357	1
34471	3	33298	0
36246	1	35560	1
33298	6	2482	0
37247	4	35846	1
6187	8	1333	0
37329	0	37315	1
6187	1	10335	0
37858	0	36485	1
25	0	35648	0
36114	2	37395	1
12579	7	37322	0
37588	0	37443	1
24489	2	34451	0
35562	4	35831	1
34819	10	20623	0
37545	0	35812	1
23793	0	33737	0
34867	0	36719	1
25859	4	5757	0
36774	2	35260	1
17545	3	15934	0
35404	0	36278	1
1678	3	15318	0
37347	0	37348	1
12188	1	16163	0
35840	0	35713	1
20554	2	4685	0
35840	3	35194	1
18623	6	30082	0
35976	0	36634	1
37322	4	2126	0
36890	1	37094	1
21061	1	13164	0
35848	0	34734	1
34679	1	13164	0
35479	0	35004	1
36403	8	34451	0
36282	5	34816	1
37630	2	16163	0
36002	1	35025	1
10335	9	24662	0
36447	6	35966	1
34770	0	28510	0
34794	2	36658	1
25	6	31334	0
34794	2	36241	1
36059	9	37122	0
37673	0	37665	1
32408	0	20554	0
34839	6	36885	1
1333	10	34770	0
37691	2	36317	1
25	1	2126	0
35948	0	36363	1
29835	0	12079	0
35948	1	35883	1
37322	10	37122	0
34889	0	36590	1
25859	1	15882	0
36124	4	34848	1
13164	0	32610	0
37527	0	37519	1
35648	4	1678	0
35464	0	37738	1
24935	9	10796	0
37793	3	35574	1
6187	1	585	0
37793	6	34726	1
2126	8	6240	0
37946	2	34798	1
10669	6	29835	0
37946	9	35600	1
34798	10	12188	0
37946	9	36658	1
5248	8	16163	0
37946	9	37169	1
15318	3	21061	0
35069	2	36543	1
30928	4	13201	0
35069	2	37139	1
8703	10	35648	0
37646	6	36511	1
23793	8	12079	0
37646	6	35628	1
10796	6	33737	0
35360	0	36260	1
1333	6	37322	0
35769	2	36302	1
34770	3	18579	0
35413	0	36222	1
4605	2	10955	0
35413	2	35398	1
16163	6	8703	0
35362	0	36719	1
32234	0	24662	0
37567	4	35289	1
13164	7	12188	0
36747	0	36014	1
31119	2	16040	0
36118	8	35920	1
34770	9	21808	0
36384	0	35231	1
34819	10	31334	0
34950	0	36044	1
30905	8	18579	0
35956	5	36136	1
18579	6	7683	0
35956	5	37118	1
34770	3	29835	0
35109	0	35278	1
12579	1	25859	0
35109	3	35506	1
37322	5	33298	0
35881	2	37805	1
33737	2	28510	0
37201	8	35865	1
585	10	12579	0
37201	4	35391	1
10955	4	31119	0
36571	0	36853	1
30905	4	32408	0
36571	2	36012	1
10796	9	35752	0
36571	2	35775	1
35648	5	10038	0
35700	4	35106	1
37122	8	4433	0
35700	9	37436	1
10955	2	32610	0
37871	2	36533	1
32234	7	1678	0
37887	5	35970	1
12468	3	37122	0
37887	5	37906	1
12079	10	20554	0
35272	0	35946	1
24489	9	26230	0
35703	1	35883	1
23793	8	4308	0
37196	2	35528	1
16040	0	25859	0
37140	2	36394	1
17545	5	267	0
36723	3	37071	1
13164	9	30082	0
36649	0	35770	1
28427	4	4308	0
37658	2	37735	1
25859	5	34451	0
37642	2	36607	1
1678	1	25604	0
37642	2	36069	1
5757	6	37122	0
34978	6	35891	1
37322	5	12188	0
36873	0	35547	1
2482	0	30061	0
37326	8	35128	1
34451	8	23518	0
37001	4	34823	1
35707	6	2482	0
37421	0	37173	1
15934	6	6187	0
36003	8	36838	1
37630	4	4685	0
37925	9	37815	1
17545	3	8922	0
34918	6	36428	1
28510	0	28427	0
35052	3	34799	1
34679	2	15318	0
37232	0	36509	1
20623	1	36803	0
35254	6	35204	1
25859	7	25604	0
35276	2	36387	1
37630	3	34588	0
34810	0	35717	1
16163	6	13201	0
35680	3	37431	1
35648	10	4685	0
35661	0	37495	1
30027	7	17545	0
34737	2	34939	1
8922	2	29835	0
37843	0	36612	1
34770	2	31119	0
34628	0	37044	1
7683	1	25859	0
35822	4	37563	1
13201	3	37322	0
35822	5	35689	1
35707	10	1678	0
35822	5	34785	1
10038	1	2482	0
37971	0	34864	1
10038	6	12468	0
35127	0	36578	1
18623	5	10796	0
35913	3	37120	1
15169	8	15198	0
36921	1	36930	1
10796	9	16040	0
37125	2	34777	1
37322	10	6187	0
34729	0	36314	1
37322	3	28763	0
36010	0	34764	1
30061	5	30061	0
35366	0	35852	1
26230	7	4605	0
36553	9	34974	1
34679	7	37122	0
36553	9	35546	1
4308	2	17545	0
37058	3	36758	1
30027	6	30928	0
35379	5	35813	1
34471	3	8703	0
36606	0	36341	1
30061	8	10335	0
37440	0	37376	1
13201	5	30439	0
34716	0	37101	1
24489	3	2126	0
36969	0	35226	1
6768	5	31119	0
36969	6	36192	1
26230	6	8922	0
36969	6	34659	1
18623	8	10335	0
34912	3	37585	1
15934	9	25859	0
34955	3	35230	1
2482	8	20554	0
36995	6	35278	1
36803	6	2126	0
35579	0	34898	1
25859	0	34679	0
35356	0	37251	1
1678	7	29835	0
35181	4	36351	1
8703	4	30061	0
36956	5	36191	1
25	9	21808	0
37903	0	37408	1
6768	4	12767	0
36119	2	34660	1
15882	1	10182	0
34946	6	37426	1
20623	7	2126	0
37321	6	36406	1
18623	0	34819	0
37592	6	36756	1
12188	1	33298	0
37237	5	35156	1
21802	1	10182	0
36440	0	35160	1
2126	0	21061	0
35771	0	35473	1
34819	2	6187	0
37279	0	35302	1
36403	5	8922	0
35402	0	36792	1
36803	2	30027	0
36277	4	35722	1
24662	9	23793	0
36277	4	34862	1
36803	6	34588	0
36910	0	36232	1
24662	2	34471	0
36910	3	34981	1
585	3	24193	0
35070	6	37336	1
10796	5	10182	0
35785	6	35771	1
34451	5	30027	0
36411	0	35263	1
12188	9	20554	0
36125	0	36554	1
27741	4	35707	0
36125	2	35162	1
25	0	12579	0
34971	0	37616	1
34451	6	36059	0
34971	2	37053	1
24193	9	20623	0
36925	2	35345	1
33298	10	36403	0
35296	2	37848	1
18579	2	32610	0
36705	0	36682	1
10182	8	18623	0
36092	0	35590	1
9256	4	15882	0
37262	0	35756	1
27741	10	12188	0
36552	3	34981	1
15198	10	6187	0
36307	3	36811	1
28211	1	32610	0
36307	2	35265	1
1333	10	28211	0
36307	2	36915	1
8703	10	37630	0
36307	2	36215	1
5248	4	34588	0
36307	2	36839	1
34798	0	2482	0
36307	2	37669	1
10669	9	26230	0
36409	0	36578	1
12079	7	8922	0
36409	6	35939	1
35752	7	8703	0
36845	2	36213	1
10669	3	32408	0
36648	3	36031	1
585	5	33298	0
36648	6	35716	1
12079	0	18967	0
36648	6	35931	1
35707	6	20623	0
36648	6	37954	1
4605	4	34679	0
37301	0	36601	1
6768	5	34679	0
35724	0	35736	1
1333	4	12079	0
37694	2	37571	1
13201	7	20554	0
36202	5	36333	1
33298	3	28427	0
35665	8	36942	1
975	7	36074	0
36819	4	36819	1
36803	9	1678	0
35232	0	37068	1
4605	4	4685	0
35232	4	36385	1
34451	4	25604	0
34726	3	37793	1
1333	4	6240	0
34739	2	37207	1
12767	1	5248	0
37973	3	36835	1
21802	3	34588	0
37002	3	36814	1
35707	6	37630	0
37635	2	37753	1
1333	1	10335	0
37116	3	37126	1
12079	7	24662	0
37800	3	36275	1
30027	3	12079	0
37800	5	37800	1
25604	10	15169	0
35651	1	35883	1
30905	0	36074	0
35863	0	37349	1
31334	5	1678	0
37892	3	37781	1
16163	2	30027	0
37892	2	37069	1
12188	4	12468	0
37878	2	37697	1
18967	3	5757	0
37239	6	36613	1
28763	9	32234	0
37206	3	35288	1
28427	6	1333	0
35565	3	35047	1
34471	6	24935	0
35565	6	36248	1
4433	9	10182	0
37403	2	35371	1
4308	6	13164	0
37403	2	35172	1
18967	0	20554	0
34962	2	37114	1
6240	4	17220	0
34962	2	36716	1
29835	2	24935	0
37952	2	36566	1
36598	0	10796	0
37952	2	37534	1
30061	9	33737	0
34767	0	35280	1
25407	0	31334	0
37473	2	35631	1
15882	7	10796	0
37473	2	35955	1
15198	8	28510	0
35772	4	36142	1
29835	10	24193	0
36349	4	35948	1
25407	7	28211	0
35814	3	35091	1
36598	2	35648	0
34956	2	36714	1
37122	0	5248	0
36511	5	36112	1
10182	0	8703	0
37245	6	36521	1
17220	6	12079	0
37333	8	35165	1
8703	5	20554	0
37333	5	36689	1
1333	4	34798	0
37168	0	36386	1
25	4	20623	0
37168	1	37584	1
25604	2	2126	0
37459	3	36884	1
37122	5	4605	0
35416	2	36071	1
15882	9	10182	0
36849	2	35826	1
25604	3	24935	0
36763	0	34979	1
32408	5	12767	0
35000	0	37408	1
37630	1	25604	0
37731	0	37463	1
4685	8	12767	0
37731	2	34817	1
12188	3	2126	0
37422	0	35896	1
15169	8	10955	0
37873	0	36351	1
25	6	28510	0
35315	0	34737	1
4433	5	33298	0
36768	0	37904	1
28427	6	34798	0
36446	2	37517	1
24662	2	25407	0
36460	2	36940	1
10335	10	36059	0
37972	3	35241	1
24193	1	15882	0
34910	2	36776	1
267	10	18967	0
35009	2	37526	1
18967	1	17545	0
35009	2	35007	1
18967	8	10669	0
35009	2	37484	1
7683	8	32408	0
35009	2	37063	1
32610	8	17545	0
35009	2	36129	1
16163	7	16163	0
35009	2	36970	1
34819	6	30439	0
35009	2	35673	1
15169	6	8703	0
35009	2	35217	1
10669	7	29835	0
35009	2	35849	1
34770	7	1333	0
36463	1	36922	1
23518	2	28427	0
37749	0	36365	1
26230	4	15318	0
36041	5	37674	1
23518	9	15169	0
36722	0	37376	1
585	3	36403	0
37411	0	34762	1
34819	10	15882	0
37835	0	35717	1
4308	3	10955	0
37835	3	36028	1
9256	0	24935	0
36332	3	36408	1
35648	2	28510	0
36332	2	37470	1
12468	5	10796	0
37628	2	36194	1
37322	3	975	0
37481	4	37313	1
31334	1	20834	0
35483	0	36946	1
20554	6	37630	0
35152	2	37208	1
16163	8	30082	0
35125	0	37140	1
15934	6	13201	0
37381	4	35447	1
15882	1	12579	0
37381	2	36944	1
5248	8	21061	0
36230	5	36772	1
16163	8	4605	0
36230	5	35972	1
23793	5	31119	0
36775	4	35856	1
4433	6	36059	0
36318	0	36335	1
35648	2	36598	0
34684	0	37958	1
18579	4	9256	0
34684	2	37596	1
18623	0	18623	0
34684	2	36149	1
10182	2	25407	0
37165	6	35657	1
34819	7	2482	0
37165	6	36067	1
24193	4	24662	0
37165	6	34977	1
27741	1	20554	0
37468	0	37849	1
25407	9	37322	0
36617	3	35337	1
25407	9	16040	0
36617	2	34820	1
31334	4	25604	0
35058	4	35030	1
1333	0	35752	0
35240	6	37226	1
21808	4	975	0
37117	2	35261	1
5757	7	15169	0
37117	2	34919	1
17220	10	585	0
37171	2	36784	1
15934	4	34798	0
36229	3	36530	1
28763	6	16163	0
36229	6	36344	1
26230	9	7683	0
35448	0	37750	1
36074	9	5248	0
35448	3	35761	1
12188	0	21808	0
36796	0	37014	1
34451	3	15318	0
35799	8	37532	1
267	0	36598	0
35799	8	37960	1
4105	8	24935	0
35359	0	37654	1
20623	4	36059	0
35359	2	37733	1
21061	3	34798	0
35927	3	34724	1
24935	0	4685	0
35036	9	35369	1
6187	9	28763	0
35036	9	35727	1
4308	9	24935	0
35036	9	35235	1
34770	2	30905	0
35036	9	35444	1
36598	1	4308	0
35036	9	35615	1
36403	7	2482	0
35036	9	35089	1
585	8	15169	0
35036	9	34880	1
34798	1	24935	0
35036	9	35952	1
16040	3	30061	0
35036	9	35209	1
33298	9	24662	0
35036	9	35670	1
20623	7	4605	0
35036	9	36140	1
35752	0	28510	0
35036	9	34830	1
36598	2	585	0
35036	9	35368	1
7683	8	13164	0
35036	9	36166	1
6768	6	10796	0
35036	9	37524	1
31119	1	36598	0
35036	9	37688	1
37630	4	35648	0
35036	9	34685	1
16163	5	5757	0
35036	9	34617	1
34588	4	10955	0
35036	9	36620	1
20834	0	8703	0
35036	9	37970	1
21808	4	7683	0
35036	9	35171	1
4308	8	28211	0
35036	9	36020	1
30928	7	24489	0
35036	9	36703	1
34798	2	12468	0
35036	9	36831	1
10182	5	27741	0
35036	9	35842	1
5757	3	28510	0
35036	9	36510	1
10335	0	12468	0
35036	9	37493	1
29835	8	17545	0
35036	9	35903	1
4685	7	10038	0
36304	0	35857	1
15934	2	36074	0
36180	5	36825	1
28763	6	15882	0
36180	5	36236	1
34471	1	15318	0
37171	2	35917	1
37122	9	28211	0
37802	0	36936	1
36074	7	33737	0
35477	0	37032	1
36598	8	24489	0
35477	4	36977	1
15318	2	25604	0
37309	0	35349	1
36598	9	35707	0
35245	0	37142	1
30905	0	15169	0
35055	2	36866	1
25859	10	26230	0
36881	0	36813	1
25407	5	8922	0
35344	6	37916	1
30928	1	1678	0
34593	0	37639	1
4605	4	30082	0
35224	0	37858	1
1333	1	37322	0
35827	4	36514	1
18967	3	12079	0
35827	2	35589	1
20834	0	10335	0
36893	8	37732	1
10182	8	12767	0
36893	4	36918	1
36803	2	20623	0
37392	0	35282	1
975	6	31119	0
37392	6	34942	1
37122	9	34770	0
35566	0	37205	1
21802	4	26230	0
37902	0	37536	1
4105	6	20554	0
35201	2	36725	1
30082	0	33737	0
34744	0	35577	1
15882	6	37630	0
34744	3	36439	1
12767	1	7683	0
36791	2	36086	1
28427	8	34451	0
36791	2	35306	1
37630	5	10955	0
36728	2	36875	1
975	7	4105	0
36728	2	36789	1
34770	3	34679	0
36559	1	36138	1
15318	10	585	0
35789	3	34710	1
26230	4	4685	0
35789	6	36364	1
18579	8	10796	0
37770	0	37820	1
25	7	1333	0
37770	3	37180	1
15934	4	36803	0
37799	0	34804	1
23518	10	4685	0
35763	0	36965	1
30082	7	34471	0
35763	3	35743	1
9256	9	2482	0
37160	4	36675	1
32408	6	34588	0
37407	0	36578	1
25604	8	33737	0
37407	6	37678	1
34588	9	15169	0
35460	0	36126	1
33737	8	15169	0
34871	5	37644	1
25407	0	23518	0
34776	4	35605	1
20623	0	15318	0
36474	4	37624	1
4433	9	6768	0
37566	0	35691	1
37630	3	35648	0
37566	2	35456	1
25	9	30905	0
37566	2	36062	1
28763	8	20554	0
37566	2	37795	1
21061	5	8703	0
35664	10	35312	1
9256	3	36059	0
35664	5	34679	1
34679	6	12079	0
35505	0	36367	1
25	10	29835	0
37505	0	35087	1
16163	3	4605	0
35476	0	36778	1
10182	10	4433	0
35476	2	35634	1
31119	3	24193	0
35476	2	35601	1
4105	8	15169	0
35476	2	34757	1
13201	6	17545	0
36972	3	36345	1
34588	2	25859	0
36972	6	35875	1
15882	8	37630	0
34755	3	35779	1
34819	3	4605	0
37842	1	35569	1
34798	0	12579	0
34650	0	37640	1
24662	7	18967	0
37521	0	36497	1
4433	4	8922	0
37521	3	36031	1
28211	7	23518	0
37521	6	34954	1
30061	3	10669	0
37521	6	37197	1
10669	2	34451	0
37521	6	36185	1
24935	1	36803	0
37521	6	37727	1
36598	0	6768	0
37521	6	35726	1
16040	0	31119	0
35915	5	36117	1
34471	1	20834	0
35311	6	34838	1
24935	0	15934	0
37803	0	34868	1
31334	8	36059	0
35258	6	37026	1
12579	7	267	0
37412	3	35507	1
21802	4	18967	0
35675	3	34980	1
37630	2	36074	0
37453	2	37444	1
21061	3	21802	0
35923	3	36217	1
30928	10	32610	0
35419	0	36399	1
32610	2	12767	0
35455	5	37359	1
24935	7	35648	0
34914	2	36050	1
4433	5	12468	0
37940	6	35957	1
17545	7	31334	0
35992	0	35919	1
23518	7	10669	0
36402	0	37376	1
31334	4	15169	0
37023	5	37847	1
12188	0	12079	0
35711	2	35521	1
12767	7	5757	0
36432	2	36157	1
24489	3	21808	0
37724	2	36466	1
10182	5	12079	0
37724	2	34843	1
18579	2	28763	0
37724	2	36462	1
12079	6	7683	0
37724	2	35791	1
7683	5	7683	0
37724	2	37291	1
20834	8	36403	0
36736	8	34879	1
34798	6	36403	0
36736	5	35597	1
10796	5	35752	0
36736	5	36589	1
33298	1	21061	0
35417	2	34790	1
34798	10	34451	0
37429	3	35119	1
21802	6	32234	0
34833	4	37896	1
33737	3	24935	0
36642	0	34686	1
21808	5	25407	0
36642	4	35205	1
267	3	26230	0
37698	0	34626	1
10038	7	30439	0
37698	2	35191	1
4105	2	31334	0
37698	2	35939	1
28211	2	21808	0
37698	2	35023	1
10038	6	10335	0
37698	2	37146	1
28510	2	12767	0
37698	2	36495	1
17220	10	2126	0
37698	2	36023	1
25407	9	18623	0
37698	2	34735	1
585	1	15318	0
37698	2	35667	1
25604	0	21808	0
37698	2	35166	1
10796	6	12079	0
37698	2	34760	1
12188	4	23793	0
37698	2	35355	1
4685	4	16040	0
37698	2	37637	1
24935	2	4105	0
37698	2	36419	1
15169	0	7683	0
37698	2	37859	1
6187	9	35707	0
37698	2	37543	1
34798	10	18967	0
37698	2	37745	1
16163	9	585	0
37698	2	37537	1
7683	0	34819	0
37698	2	37172	1
28763	9	30027	0
37698	2	37228	1
15169	5	12079	0
37698	2	34623	1
36403	10	4105	0
37698	2	34746	1
5248	2	6187	0
37698	2	35344	1
13201	9	32408	0
37698	2	36082	1
6240	10	34471	0
37698	2	36254	1
31334	9	15934	0
37698	2	35274	1
5248	7	4685	0
37698	2	36549	1
33737	3	21808	0
37698	2	37249	1
34770	4	21802	0
36209	3	36331	1
34451	10	30027	0
[truncated: 698 more rows]
