# Supplementary material
Source: ML conference proceedings conference paper supplement (https://proceedings.neurips.cc/paper_files/paper/2021/hash/0fd600c953cde8121262e322ef09f70e-Abstract.html)
Supplement: Supplementary file 1 [file 0fd600c953cde8121262e322ef09f70e-Supplemental.zip › Supplementary_Material_Paper_8745/data/Hamaguchi-BM_both-3000/test/test-random-sample/test6.txt]

37705	0	37801	1
32859	4	37072	0
37549	2	36299	1
14361	7	29837	0
37220	2	36370	1
4619	9	16284	0
35926	0	34619	1
24391	2	26316	0
37071	6	37492	1
8064	10	30456	0
37071	6	37233	1
35565	1	3310	0
37071	2	37824	1
31323	0	26117	0
37071	6	35341	1
6474	6	2911	0
37071	6	34753	1
13079	10	18312	0
37071	6	36560	1
36991	7	12209	0
37071	6	37193	1
29435	4	29435	0
37071	6	36256	1
33221	1	22947	0
37071	6	37306	1
21548	4	37776	0
37131	8	36838	1
4890	5	20144	0
35559	0	34898	1
11876	10	14361	0
35559	6	35364	1
5928	0	30199	0
36523	0	36682	1
35464	6	7809	0
36523	3	35987	1
33221	3	23980	0
34741	9	36177	1
32300	10	13988	0
34644	6	35080	1
28672	1	26827	0
36187	6	36167	1
34675	1	29435	0
36027	0	36802	1
37839	6	4309	0
37621	0	37746	1
36699	7	4710	0
37621	2	36225	1
19362	7	36561	0
34965	5	37568	1
32123	7	34867	0
34965	5	36383	1
30058	3	30058	0
34965	5	36252	1
9107	1	31843	0
37039	4	36609	1
12782	5	23265	0
37153	1	34941	1
19582	1	9497	0
34865	4	36960	1
33318	2	37603	0
36577	3	37165	1
35565	9	30308	0
36657	0	37857	1
17057	2	22000	0
35490	2	35668	1
34129	2	27990	0
35256	2	36742	1
37405	6	10624	0
35256	2	37767	1
8709	4	17892	0
36724	1	37946	1
8245	8	6568	0
36471	0	37257	1
449	9	28067	0
36471	2	36706	1
33318	7	31323	0
36471	2	36333	1
32859	3	19721	0
37099	0	37780	1
4308	7	34770	0
36653	5	35964	1
31994	4	22786	0
36479	4	35942	1
14570	10	12121	0
37285	1	37885	1
25001	6	11876	0
34961	3	34907	1
17449	8	21431	0
37839	9	34648	1
37083	6	15905	0
37025	0	36719	1
7815	4	15016	0
36374	0	35978	1
12188	10	10955	0
36374	3	36697	1
9256	4	585	0
36374	6	35358	1
34599	10	1431	0
35319	1	37938	1
32526	1	37764	0
35105	0	34743	1
35295	0	17678	0
37796	6	35046	1
20936	8	123	0
34731	2	36231	1
33543	0	31331	0
34731	2	36911	1
18312	6	6463	0
34731	2	37936	1
37113	5	36416	0
34731	2	36442	1
35648	7	10182	0
34731	2	37383	1
14485	6	8916	0
34731	2	36720	1
14022	5	18124	0
34731	2	35179	1
5212	0	31122	0
37622	0	35717	1
36337	6	37191	0
37004	1	37252	1
35295	9	22240	0
36635	2	34647	1
35288	2	10150	0
34995	2	37811	1
25	1	24193	0
35977	3	36153	1
15198	5	12188	0
35893	6	37582	1
34129	3	36337	0
35893	6	36458	1
30129	2	6423	0
35893	6	35777	1
10446	7	26629	0
35893	6	35845	1
5587	10	7168	0
35893	6	36987	1
10277	10	30948	0
37360	0	34975	1
20546	1	31413	0
36245	0	36640	1
19217	1	13956	0
35644	2	34911	1
7618	1	33864	0
37415	3	37190	1
3944	1	6988	0
36591	0	37698	1
13799	6	9863	0
35095	6	35639	1
21045	8	36146	0
37719	2	34578	1
4890	9	34918	0
35377	2	34856	1
19039	3	35893	0
35377	2	37957	1
24863	5	36645	0
35377	2	35151	1
21006	0	35205	0
35377	2	35540	1
37839	3	29837	0
35377	2	35289	1
30850	10	22000	0
36501	2	37179	1
34798	6	13164	0
37939	2	35006	1
6116	6	4845	0
37553	0	36802	1
2	1	8904	0
35513	3	35788	1
10446	3	33543	0
36616	3	37088	1
25271	9	16411	0
36348	0	36604	1
25148	2	2531	0
36046	2	37908	1
21635	8	37768	0
35462	3	35393	1
5847	7	13988	0
35462	6	37132	1
35064	5	12200	0
35462	6	34855	1
33543	1	27661	0
35462	6	37500	1
2969	2	16894	0
35462	6	35816	1
24662	10	267	0
35462	6	35704	1
24402	7	13061	0
35462	6	36457	1
24777	6	6463	0
35462	6	35157	1
20094	0	27997	0
35462	6	35454	1
2531	0	32681	0
35462	6	35746	1
30199	4	36088	0
35462	6	35020	1
1333	7	5886	0
37375	0	35907	1
15252	0	26439	0
35353	2	35014	1
11182	6	32866	0
34854	0	36578	1
7815	7	31172	0
35192	0	37849	1
29068	6	19617	0
36011	0	37408	1
30456	1	10435	0
37681	6	36359	1
36531	3	37623	0
35499	5	37963	1
21135	10	35565	0
35499	9	37498	1
13259	7	29435	0
35314	2	36042	1
17796	8	23980	0
35314	2	35399	1
22070	0	14508	0
35121	3	34842	1
21177	7	16735	0
37107	0	35635	1
26487	5	273	0
37107	1	34881	1
35644	5	20733	0
35198	2	35588	1
394	0	35893	0
37649	5	34825	1
18623	5	5757	0
35671	4	37152	1
975	3	10669	0
35387	2	36767	1
31119	8	23518	0
35092	6	36862	1
31172	10	24777	0
35092	6	36611	1
13987	9	11367	0
36037	4	37910	1
1049	8	648	0
36292	0	36232	1
34471	8	23793	0
37504	1	35569	1
10624	2	34129	0
35858	0	35180	1
4890	7	14361	0
35250	0	35147	1
26629	8	32783	0
36712	0	36762	1
14570	9	31733	0
35018	4	36683	1
13987	8	7726	0
35687	6	36443	1
35464	8	14760	0
37759	3	35834	1
22265	1	18643	0
35981	0	35541	1
15352	6	35893	0
36410	0	37415	1
27990	4	21135	0
37638	8	34653	1
34129	6	29471	0
37638	1	35991	1
10446	6	21376	0
36361	0	36719	1
21376	2	7809	0
36361	3	37929	1
8144	6	35288	0
37495	2	37626	1
23518	6	7683	0
37495	2	35512	1
25859	10	36403	0
34769	0	37361	1
9732	2	27228	0
37918	2	35808	1
35604	9	37839	0
36898	0	35857	1
17024	2	8245	0
36909	4	36316	1
32681	6	24827	0
35908	0	37324	1
17796	0	12651	0
36512	2	36046	1
24886	8	22391	0
35563	0	36232	1
25077	6	31554	0
35805	0	36709	1
15318	1	29835	0
37754	8	34879	1
14374	8	21177	0
37754	5	36073	1
36699	6	28067	0
37010	2	36103	1
30439	1	28510	0
36053	2	36026	1
27060	5	26928	0
36053	2	37730	1
13249	7	13799	0
37167	0	37640	1
15634	7	23794	0
37167	6	37863	1
31532	10	27060	0
36957	2	37832	1
24863	10	34675	0
36994	6	36897	1
13373	4	23976	0
36403	4	36403	1
10542	10	2271	0
35008	6	34717	1
35752	5	17545	0
36160	4	36182	1
11098	7	27594	0
35526	0	36674	1
30905	7	28427	0
35318	0	36547	1
12002	2	25174	0
35147	2	37880	1
15198	10	20834	0
35147	2	34687	1
10059	8	10612	0
34740	0	37718	1
36059	10	5757	0
37744	3	36981	1
37384	3	4106	0
35636	1	37218	1
8857	3	34318	0
34960	2	37015	1
6188	3	99	0
34960	2	36137	1
32859	8	13954	0
34960	2	37734	1
36699	6	2531	0
35998	9	37454	1
9256	5	36403	0
36880	1	37798	1
24827	8	21569	0
35238	4	37048	1
35464	4	5881	0
35099	9	36405	1
19721	6	3190	0
35099	9	37844	1
24193	1	17220	0
35099	9	35926	1
23915	10	5580	0
36488	5	35524	1
3185	10	14991	0
34690	3	36414	1
12545	8	37764	0
36435	5	36051	1
37526	9	22527	0
36759	5	35327	1
36991	3	1995	0
34579	2	34847	1
4106	0	394	0
34904	9	36575	1
30872	0	25908	0
36207	0	37536	1
14012	3	36699	0
37891	0	37147	1
7042	2	1322	0
35414	5	35136	1
36416	8	23980	0
36746	8	36548	1
21061	5	34588	0
36293	5	35757	1
35752	5	15198	0
34928	0	36719	1
22714	6	12200	0
36843	0	36719	1
18381	9	31532	0
36807	0	35465	1
20631	1	35288	0
34805	2	36941	1
23265	3	27661	0
37013	3	37682	1
15268	8	29471	0
35913	4	37563	1
4271	9	35354	0
35913	3	36782	1
35245	10	1620	0
35913	5	36822	1
11367	3	30455	0
35913	5	35982	1
37651	2	32369	0
36281	0	37348	1
24935	8	34451	0
37914	0	35226	1
33318	6	6627	0
34964	6	34860	1
5580	3	27990	0
34632	4	36032	1
37072	5	1995	0
36437	0	35207	1
2482	0	7683	0
35603	0	35405	1
31323	3	4945	0
37760	0	34836	1
9558	9	36146	0
35693	2	35518	1
15169	10	34819	0
37542	2	36056	1
793	8	31565	0
37542	2	37726	1
12512	4	19582	0
37579	0	36682	1
9571	6	24957	0
35682	6	37318	1
4945	9	16284	0
35544	4	37894	1
18907	6	13477	0
35544	6	37433	1
21177	9	20064	0
34642	3	36531	1
2827	2	23507	0
34642	2	35578	1
8916	4	31813	0
34642	9	36162	1
15934	10	24193	0
35283	2	37629	1
2111	2	16361	0
35873	3	37298	1
33318	10	5846	0
37056	2	36001	1
12767	0	30905	0
37056	2	37920	1
4845	3	9732	0
37927	2	35062	1
35754	6	24777	0
36013	9	36780	1
36567	10	7362	0
34691	0	35392	1
8904	3	36074	0
37369	6	35640	1
4605	0	6240	0
35467	0	36116	1
25703	4	30308	0
35467	2	35303	1
19633	1	19633	0
35467	2	35669	1
31994	8	20390	0
35467	2	35844	1
337	8	6581	0
37177	0	36682	1
3464	2	7042	0
36334	0	35032	1
35604	8	17712	0
36334	2	37778	1
22968	0	13799	0
36014	2	36500	1
37723	0	2001	0
37702	0	37138	1
22240	1	34867	0
36268	0	36682	1
6581	5	25271	0
34887	0	34898	1
15882	7	28763	0
37303	0	37698	1
23218	0	2001	0
37303	3	36127	1
35644	10	1997	0
37271	1	36224	1
29292	2	13262	0
37497	2	37442	1
30559	6	28063	0
37497	2	35484	1
31813	7	3257	0
36427	2	34884	1
34798	5	31334	0
36427	2	34943	1
30101	10	11293	0
36427	2	36667	1
3464	6	12002	0
36427	2	36279	1
25908	6	15858	0
36427	2	37374	1
13369	1	31900	0
36427	2	36015	1
5846	5	36645	0
36427	2	37038	1
15352	3	9232	0
36427	2	37388	1
34471	7	6240	0
35310	0	36682	1
4605	8	23518	0
35078	0	34734	1
32300	6	9480	0
36077	4	36619	1
22947	0	19721	0
36257	0	36682	1
18628	6	12421	0
36257	6	34666	1
37825	9	9863	0
36257	6	36899	1
13263	0	23976	0
34710	6	37346	1
35055	10	10706	0
34710	6	36234	1
37969	4	3461	0
34710	6	36054	1
24483	1	6290	0
34714	0	34602	1
19362	7	20546	0
35022	2	34637	1
8709	7	34929	0
35022	2	36454	1
29491	8	3185	0
35022	2	35824	1
10150	6	7003	0
37077	2	35997	1
27060	9	12769	0
36978	2	36692	1
29068	10	19617	0
37090	2	35203	1
30061	5	10335	0
35761	6	35448	1
6081	8	1049	0
36212	3	37808	1
13259	0	34675	0
35388	0	37341	1
10955	7	34588	0
36629	5	37712	1
27020	5	10133	0
34927	8	35215	1
585	8	37122	0
36266	3	34649	1
1673	6	36338	0
37853	2	37082	1
6768	1	6240	0
36379	1	34853	1
19202	0	37072	0
37302	4	34952	1
27590	6	14760	0
37302	2	36949	1
2271	1	15016	0
37302	2	36298	1
16029	3	11973	0
37302	5	36984	1
17892	4	34726	0
37302	5	35423	1
18834	5	23980	0
35415	3	34658	1
18628	7	13549	0
34646	6	36715	1
16870	8	23915	0
36175	6	35663	1
12123	2	7053	0
36908	0	37324	1
6290	4	30308	0
36908	2	36945	1
4752	5	33864	0
34766	3	37646	1
37322	1	975	0
35158	0	37221	1
31334	10	28427	0
37342	4	36255	1
37651	2	9727	0
36469	0	37463	1
37191	8	5857	0
36582	0	34784	1
9706	2	9898	0
35170	0	35621	1
18150	3	29519	0
34694	1	35748	1
18623	8	1678	0
36600	0	34719	1
13477	3	8110	0
37710	2	35164	1
21666	3	26866	0
37344	0	36417	1
37825	3	35897	0
35572	0	36578	1
13201	4	18579	0
35572	6	36810	1
1823	6	27010	0
35572	6	35768	1
37723	6	6568	0
36200	6	34766	1
27997	8	37032	0
36273	0	36103	1
13234	5	31413	0
37515	2	35375	1
35644	8	24360	0
37299	2	37299	1
18967	6	6768	0
34712	0	37971	1
30642	1	37526	0
36638	0	36567	1
34759	4	30129	0
36859	4	34656	1
15934	4	33298	0
35623	6	35749	1
1678	2	20623	0
35623	6	37307	1
29936	2	34867	0
35019	0	35282	1
24886	10	13369	0
37882	2	35123	1
30927	4	1997	0
35720	2	35747	1
20064	1	17008	0
36572	0	37386	1
16029	2	25077	0
36572	2	34789	1
32234	4	24193	0
34809	2	36210	1
7709	5	3918	0
34809	2	35289	1
99	4	8179	0
34809	2	37134	1
1547	9	36110	0
34809	2	34700	1
22391	2	23915	0
34809	5	35072	1
30308	6	27228	0
34809	2	35953	1
23894	10	23510	0
35281	0	36905	1
11973	6	12123	0
37184	2	36588	1
13918	9	36536	0
37184	2	37435	1
9480	10	30455	0
35823	0	36232	1
10133	2	22275	0
37035	6	36301	1
36415	10	9706	0
37035	6	36576	1
35139	6	35055	0
37035	6	36626	1
37776	1	6627	0
37035	6	35425	1
20546	0	11149	0
34704	6	36395	1
36337	4	22265	0
36761	4	36135	1
32866	4	31323	0
35427	0	36853	1
34535	2	36088	0
35297	3	36996	1
13234	2	15858	0
35012	4	36686	1
29435	3	34803	0
37185	4	35106	1
8179	6	2111	0
36376	0	35301	1
35295	4	34759	0
36674	0	35833	1
4309	5	37596	0
35852	2	36198	1
9558	7	7168	0
35852	2	37283	1
19362	5	1102	0
35852	2	35299	1
33298	3	34471	0
35852	2	35397	1
35245	6	33318	0
35852	2	36525	1
37032	2	27997	0
35852	2	37079	1
23218	0	33091	0
35852	2	34951	1
36416	5	10133	0
35852	2	36557	1
4499	9	14485	0
35852	2	37031	1
13987	2	36500	0
35852	2	36677	1
18150	9	13373	0
37533	0	36904	1
2111	4	5432	0
35187	2	36800	1
19875	9	35064	0
37200	3	35006	1
13918	9	29491	0
35408	9	36081	1
13079	3	14365	0
35408	9	35446	1
34451	6	6187	0
37244	5	35208	1
22714	6	30370	0
35285	2	37091	1
34759	4	29971	0
35290	2	37159	1
24402	0	36668	0
35290	2	35829	1
36561	3	19542	0
35290	2	37642	1
16040	0	1333	0
35742	0	37289	1
10612	3	22609	0
36580	8	35009	1
9571	7	5835	0
35686	3	36804	1
33737	9	5757	0
34636	2	36786	1
35963	9	26928	0
36195	2	36407	1
30141	2	33861	0
35129	3	36028	1
12420	1	8064	0
35101	6	35809	1
36337	2	6116	0
36529	2	37883	1
35704	9	24886	0
36529	2	34797	1
34819	1	15882	0
37810	0	35717	1
11829	1	8064	0
35390	2	36130	1
7273	3	29068	0
35390	2	36985	1
36823	4	30455	0
37783	0	36154	1
20535	2	36668	0
34896	0	35907	1
16123	10	34923	0
34896	3	37491	1
7754	6	26866	0
34942	6	35950	1
33298	3	20834	0
34942	6	36608	1
32610	5	10038	0
36836	0	37640	1
20936	5	35897	0
36836	3	36206	1
37032	9	3423	0
35712	2	35951	1
15352	7	24061	0
35678	4	34965	1
37564	4	23153	0
35678	5	35664	1
7570	4	12280	0
35678	5	35583	1
35707	8	21061	0
37652	4	35461	1
36699	10	17796	0
36765	4	35382	1
22174	10	24957	0
36765	5	35495	1
8058	9	7570	0
34834	5	36077	1
18834	4	37534	0
35918	2	36424	1
14374	5	25271	0
35426	2	37267	1
21062	0	27512	0
36544	2	37033	1
23825	0	6423	0
36866	0	35055	1
5757	2	4433	0
35662	3	36200	1
32371	10	28949	0
35662	10	37684	1
18643	9	26629	0
35662	5	36416	1
13817	2	10824	0
35802	0	34905	1
12188	0	21808	0
37928	0	36232	1
1431	6	6988	0
37707	4	36237	1
37348	10	13418	0
36448	0	37480	1
7683	10	36403	0
36290	5	36870	1
29789	6	33543	0
37310	3	36637	1
37101	8	6988	0
35778	5	37092	1
37603	4	11829	0
35515	3	37071	1
28510	6	17220	0
37319	2	36106	1
4499	9	14485	0
36132	8	34804	1
6627	1	29530	0
36707	2	34876	1
449	5	3537	0
35795	0	35990	1
16016	1	30455	0
36380	0	35978	1
2482	2	5757	0
36444	3	37382	1
36991	9	24827	0
36258	0	35860	1
6240	2	30082	0
35839	0	37438	1
25407	9	28427	0
37115	0	36562	1
2595	4	7402	0
37214	4	35380	1
21431	1	9727	0
37214	5	37921	1
19682	0	32369	0
35397	6	37353	1
23507	3	9497	0
37130	1	35883	1
17101	4	24916	0
36453	0	36886	1
14485	9	7618	0
36453	5	37051	1
35604	5	37723	0
34780	0	35247	1
25407	10	6240	0
37203	0	37750	1
13275	9	23394	0
35150	0	37611	1
10706	6	37651	0
36604	0	36528	1
35295	3	31172	0
35591	3	36656	1
36991	0	36991	0
37538	2	37296	1
14991	3	15858	0
34786	8	37724	1
8709	5	34535	0
34786	5	36368	1
10133	8	13589	0
37829	2	37253	1
24193	10	12579	0
37829	2	36936	1
30928	3	37322	0
34707	2	36145	1
7815	4	2271	0
34707	2	36204	1
20733	2	7815	0
37150	0	37743	1
1673	0	394	0
35137	3	34583	1
30872	0	32940	0
37322	2	37012	1
9009	9	29471	0
36397	2	37769	1
27481	9	12568	0
34951	3	36017	1
16123	4	27990	0
37653	1	34808	1
22500	0	648	0
36569	2	35545	1
31331	6	6859	0
36569	2	36143	1
5142	1	30648	0
37339	0	35907	1
8916	8	21666	0
36328	3	37209	1
3537	6	23600	0
36328	6	34644	1
2126	5	34471	0
36328	6	36850	1
19617	8	5847	0
36328	6	35935	1
20631	1	2001	0
36587	0	34668	1
36416	1	1388	0
36992	0	37487	1
24391	5	8849	0
36347	0	35575	1
32859	10	16735	0
37840	2	36752	1
26230	9	12579	0
35921	0	36578	1
18623	2	9256	0
37287	3	36076	1
8245	8	10150	0
34604	5	35855	1
22275	9	22947	0
34604	5	34756	1
29041	9	29782	0
35538	0	37640	1
13410	1	8058	0
34749	2	37312	1
37526	10	37534	0
36280	2	36955	1
27160	4	29782	0
36690	8	34879	1
9706	2	16284	0
36690	5	36073	1
32123	7	35644	0
36690	5	35996	1
22609	7	15858	0
37334	2	34699	1
29971	9	22174	0
36550	5	37240	1
34918	6	26827	0
37057	0	36303	1
25859	2	12188	0
34878	2	37561	1
33543	9	12782	0
36717	6	36967	1
26142	0	36668	0
34875	0	34963	1
19633	4	37768	0
34615	3	37462	1
31994	8	65	0
34615	6	37076	1
35893	5	17024	0
36381	0	37496	1
2259	7	8857	0
34783	3	37311	1
3423	3	6116	0
34783	6	35598	1
30199	9	34867	0
34783	6	37809	1
8144	2	7273	0
36697	6	36374	1
1431	6	19362	0
36697	6	35961	1
30948	10	5142	0
36499	0	34749	1
35754	2	24957	0
35094	2	37334	1
26629	10	10624	0
37782	2	37551	1
15198	7	27741	0
37782	2	37757	1
4433	9	34798	0
35113	6	36643	1
25703	7	33543	0
36389	0	36465	1
13079	6	24916	0
36389	2	37696	1
18907	7	12123	0
36389	2	37028	1
13201	2	10335	0
34662	3	34726	1
32526	8	21177	0
37174	2	35916	1
36991	8	9034	0
36595	2	34995	1
3537	8	30012	0
34734	2	37188	1
15749	9	11149	0
37889	2	37901	1
7003	7	36338	0
35061	2	35930	1
13259	9	27512	0
37427	0	36188	1
23894	0	37083	0
36458	6	37416	1
4499	10	34984	0
36070	0	35852	1
10612	6	1102	0
36426	3	35536	1
34867	4	16361	0
37007	6	36196	1
25703	4	24886	0
35500	4	37152	1
15074	2	9537	0
35361	2	37137	1
15650	3	2969	0
35361	2	37089	1
21006	3	1287	0
35219	5	35585	1
16284	2	10319	0
34633	2	34975	1
30012	1	7441	0
36475	0	36824	1
31554	0	26316	0
36764	3	36797	1
35565	8	6116	0
35028	2	35043	1
4105	2	16163	0
35028	2	36563	1
28211	6	6187	0
35028	2	34640	1
24725	2	22500	0
35803	0	35960	1
1130	4	21376	0
35141	0	35731	1
15352	10	31250	0
35522	2	36929	1
6593	5	17913	0
36495	3	36439	1
12468	4	18579	0
37223	0	36778	1
32371	10	13988	0
36605	5	36285	1
27990	6	8762	0
36605	5	35220	1
4845	9	13275	0
36605	10	37687	1
8058	7	32706	0
37643	3	36966	1
31813	2	18124	0
35798	0	37607	1
7815	1	17892	0
34807	0	36934	1
37191	3	15252	0
37005	0	36896	1
34451	7	23518	0
37437	4	37059	1
37900	3	16050	0
35449	0	36469	1
36531	8	7566	0
36551	0	37709	1
20064	10	12545	0
36551	5	34800	1
17913	2	13234	0
36679	0	37895	1
7372	5	32343	0
36679	0	37720	1
34471	9	18623	0
37659	6	37111	1
9537	8	10824	0
37170	6	36039	1
23112	7	17691	0
37627	2	34734	1
12280	3	12651	0
37627	2	35681	1
32408	8	10335	0
37627	2	35684	1
17355	7	23809	0
37046	0	35632	1
37122	10	13201	0
37046	2	37455	1
11098	7	36210	0
37046	2	35142	1
33893	4	25150	0
37046	2	36913	1
37728	5	7372	0
37046	2	36055	1
36561	0	36567	0
37046	2	37330	1
37825	9	11973	0
36368	5	34727	1
394	10	13988	0
36368	5	36434	1
35470	8	36699	0
36368	5	35184	1
37072	5	12280	0
36368	5	36468	1
14760	8	5341	0
36218	0	36708	1
17008	9	36146	0
36120	2	36233	1
37900	1	31301	0
36120	2	34575	1
10706	6	1431	0
36478	6	36217	1
27060	3	23976	0
35033	3	36028	1
30027	2	26230	0
34596	5	34595	1
7566	9	3944	0
36481	1	37584	1
29440	4	10133	0
36827	3	35845	1
2126	8	37322	0
36082	0	37698	1
15268	10	30308	0
34594	0	35103	1
22070	4	28949	0
34594	9	37576	1
2892	7	31900	0
34594	9	36506	1
6463	7	2271	0
36235	0	37789	1
2259	6	11098	0
37728	5	35739	1
35604	4	36500	0
35445	2	37029	1
65	4	29761	0
35445	2	35132	1
37651	2	25174	0
37451	0	36493	1
36536	5	36531	0
37084	6	37434	1
7905	8	15650	0
35037	2	37507	1
1547	3	5847	0
37207	2	36622	1
34129	4	21376	0
36096	4	37910	1
32859	4	15656	0
35391	5	35502	1
21431	7	35064	0
35391	10	35699	1
4605	4	36074	0
35573	0	35525	1
36823	0	1049	0
36664	0	36803	1
20535	3	36823	0
35548	0	35938	1
33893	4	30850	0
35548	2	36857	1
21135	4	27228	0
35690	0	36312	1
36823	9	19633	0
35602	0	36043	1
37526	3	9558	0
36276	0	35197	1
7905	8	26792	0
37072	3	36028	1
29835	6	28427	0
34924	5	37572	1
4105	3	34798	0
36687	6	36680	1
11149	5	9769	0
37735	0	37658	1
10663	8	5587	0
37735	2	35649	1
1333	3	3918	0
36999	3	35764	1
19202	6	17796	0
37850	0	36274	1
4308	0	34471	0
37850	2	37666	1
20590	4	15074	0
36375	0	35032	1
9898	9	1540	0
36700	3	34748	1
24916	5	30101	0
34752	0	37361	1
35464	5	5881	0
35171	1	35036	1
21376	1	29041	0
37854	0	36429	1
6240	0	24935	0
37854	2	35395	1
4619	2	19582	0
36060	3	37951	1
5846	10	3257	0
37027	3	35153	1
7053	3	32123	0
34813	0	34703	1
7683	3	2126	0
34713	0	37376	1
24916	1	16361	0
35403	0	34764	1
5248	2	30439	0
35403	3	35845	1
13259	1	10319	0
37112	0	36035	1
30012	1	36146	0
37112	4	34601	1
27010	2	34923	0
34840	0	34806	1
21335	2	17796	0
36152	2	36785	1
34867	9	22174	0
36152	5	35252	1
36668	2	13418	0
36959	0	35357	1
23218	3	37384	0
36246	1	35560	1
34770	0	28763	0
37247	4	35846	1
23809	10	26629	0
37329	0	37315	1
65	7	14508	0
37858	0	36485	1
23793	9	10955	0
36114	2	37395	1
22391	7	5197	0
37588	0	37443	1
37768	2	20535	0
35562	4	35831	1
32617	6	21431	0
37545	0	35812	1
17712	8	37619	0
34867	0	36719	1
9537	7	30058	0
36774	2	35260	1
7905	3	4414	0
35404	0	36278	1
2969	2	37072	0
37347	0	37348	1
30058	9	12121	0
35840	0	35713	1
12188	6	2482	0
35840	3	35194	1
36598	6	36598	0
35976	0	36634	1
36210	4	24777	0
36890	1	37094	1
1495	3	18381	0
35848	0	34734	1
27481	2	4499	0
35479	0	35004	1
36337	9	25703	0
36282	5	34816	1
9732	7	11092	0
36002	1	35025	1
20094	9	27997	0
36447	6	35966	1
25908	5	33893	0
34794	2	36658	1
15749	0	10059	0
34794	2	36241	1
32032	9	29292	0
37673	0	37665	1
28510	9	34679	0
34839	6	36885	1
37526	8	7441	0
37691	2	36317	1
31777	8	23507	0
35948	0	36363	1
1997	0	24957	0
35948	1	35883	1
12545	9	1333	0
34889	0	36590	1
6081	3	5847	0
36124	4	34848	1
30455	7	37619	0
37527	0	37519	1
33318	9	10277	0
35464	0	37738	1
22391	0	24886	0
37793	3	35574	1
36415	0	27512	0
37793	6	34726	1
24725	5	2911	0
37946	2	34798	1
36338	7	1049	0
37946	9	35600	1
7152	1	34984	0
37946	9	36658	1
9009	9	5580	0
37946	9	37169	1
21601	7	29292	0
35069	2	36543	1
13275	8	14374	0
35069	2	37139	1
34318	2	16050	0
37646	6	36511	1
12188	5	21808	0
37646	6	35628	1
23112	8	30455	0
35360	0	36260	1
37384	9	20535	0
35769	2	36302	1
5886	7	1632	0
35413	0	36222	1
21045	0	17008	0
35413	2	35398	1
13799	2	25077	0
35362	0	36719	1
23112	5	35604	0
37567	4	35289	1
31532	0	13549	0
36747	0	36014	1
16123	6	14400	0
36118	8	35920	1
1547	7	7726	0
36384	0	35231	1
31733	4	12568	0
34950	0	36044	1
36074	8	33737	0
35956	5	36136	1
123	9	35295	0
35956	5	37118	1
30850	1	14991	0
35109	0	35278	1
22609	2	13263	0
35109	3	35506	1
34798	2	2482	0
35881	2	37805	1
29150	10	10624	0
37201	8	35865	1
15016	10	18312	0
37201	4	35391	1
23560	0	11154	0
36571	0	36853	1
36146	8	12545	0
36571	2	36012	1
35754	1	34535	0
36571	2	35775	1
29041	4	18643	0
35700	4	35106	1
22786	1	20631	0
35700	9	37436	1
34803	5	8916	0
37871	2	36533	1
5881	7	21376	0
37887	5	35970	1
10038	3	20834	0
37887	5	37906	1
6188	9	5835	0
35272	0	35946	1
32617	2	23560	0
35703	1	35883	1
29761	5	11367	0
37196	2	35528	1
24935	10	30082	0
37140	2	36394	1
27020	1	14012	0
36723	3	37071	1
17220	2	23518	0
36649	0	35770	1
15318	2	16163	0
37658	2	37735	1
3634	1	31532	0
37642	2	36607	1
16870	8	9009	0
37642	2	36069	1
13511	4	23794	0
34978	6	35891	1
4106	8	23218	0
36873	0	35547	1
37776	0	30058	0
37326	8	35128	1
33318	0	8916	0
37001	4	34823	1
17220	8	25	0
37421	0	37173	1
13164	2	15169	0
36003	8	36838	1
28510	5	36059	0
37925	9	37815	1
13817	0	12420	0
34918	6	36428	1
8709	5	30101	0
35052	3	34799	1
35897	7	13249	0
37232	0	36509	1
12123	7	33746	0
35254	6	35204	1
13817	2	11182	0
35276	2	36387	1
31900	7	27228	0
34810	0	35717	1
31565	2	26928	0
35680	3	37431	1
22174	1	19257	0
35661	0	37495	1
24193	5	12188	0
34737	2	34939	1
31331	2	23394	0
37843	0	36612	1
13484	4	24916	0
34628	0	37044	1
18124	4	13098	0
35822	4	37563	1
13079	2	31554	0
35822	5	35689	1
28510	10	13164	0
35822	5	34785	1
35648	0	34798	0
37971	0	34864	1
4309	10	19633	0
35127	0	36578	1
17024	0	648	0
35913	3	37120	1
33221	2	23153	0
36921	1	36930	1
10612	1	1495	0
37125	2	34777	1
13098	10	5067	0
34729	0	36314	1
5341	1	34129	0
36010	0	34764	1
35867	9	30851	0
35366	0	35852	1
33221	2	7570	0
36553	9	34974	1
10669	8	35752	0
36553	9	35546	1
24391	10	35897	0
37058	3	36758	1
24061	3	6081	0
35379	5	35813	1
14037	3	35214	0
36606	0	36341	1
25001	2	35893	0
37440	0	37376	1
35754	2	9863	0
34716	0	37101	1
37083	7	1102	0
36969	0	35226	1
5857	4	17355	0
36969	6	36192	1
23112	0	37596	0
36969	6	34659	1
30082	1	12188	0
34912	3	37585	1
31122	10	23809	0
34955	3	35230	1
19617	9	13511	0
36995	6	35278	1
30905	9	12188	0
35579	0	34898	1
12200	8	15858	0
35356	0	37251	1
13418	4	13988	0
35181	4	36351	1
29471	6	11140	0
36956	5	36191	1
15518	5	23231	0
37903	0	37408	1
30027	4	32610	0
36119	2	34660	1
35245	8	7152	0
34946	6	37426	1
12410	4	25174	0
37321	6	36406	1
16163	4	15169	0
37592	6	36756	1
36500	5	29761	0
37237	5	35156	1
32408	10	21808	0
36440	0	35160	1
1130	6	34923	0
35771	0	35473	1
34803	3	30648	0
37279	0	35302	1
35354	10	21335	0
35402	0	36792	1
23112	4	13418	0
36277	4	35722	1
19709	3	2111	0
36277	4	34862	1
7152	2	27527	0
36910	0	36232	1
20094	10	14760	0
36910	3	34981	1
21635	0	9753	0
35070	6	37336	1
27060	3	3634	0
35785	6	35771	1
35867	10	22947	0
36411	0	35263	1
32300	4	32371	0
36125	0	36554	1
12280	1	1388	0
36125	2	35162	1
20546	1	32369	0
34971	0	37616	1
29761	10	37596	0
34971	2	37053	1
21548	0	37776	0
36925	2	35345	1
1388	0	5886	0
35296	2	37848	1
35963	5	34599	0
36705	0	36682	1
2595	5	14508	0
36092	0	35590	1
23828	6	12812	0
37262	0	35756	1
12342	6	3461	0
36552	3	34981	1
7726	4	23218	0
36307	3	36811	1
15074	10	34803	0
36307	2	35265	1
33221	10	8058	0
36307	2	36915	1
11149	1	9889	0
36307	2	36215	1
10955	2	31119	0
36307	2	36839	1
6116	4	26629	0
36307	2	37669	1
10038	0	36598	0
36409	0	36578	1
37630	8	36059	0
36409	6	35939	1
27005	3	35139	0
36845	2	36213	1
37969	4	7362	0
36648	3	36031	1
11007	9	22968	0
36648	6	35716	1
35295	5	7053	0
36648	6	35931	1
7905	5	32032	0
36648	6	37954	1
30439	0	23793	0
37301	0	36601	1
30101	9	24957	0
35724	0	35736	1
25859	2	20623	0
37694	2	37571	1
13079	10	22174	0
36202	5	36333	1
13418	5	9232	0
35665	8	36942	1
29435	9	12999	0
36819	4	36819	1
13477	7	35295	0
35232	0	37068	1
16827	3	4845	0
35232	4	36385	1
17024	5	31250	0
34726	3	37793	1
15268	10	16417	0
34739	2	37207	1
3257	9	28063	0
37973	3	36835	1
33986	9	2111	0
37002	3	36814	1
17354	7	25703	0
37635	2	37753	1
16735	4	20064	0
37116	3	37126	1
16361	2	37825	0
37800	3	36275	1
13369	0	31331	0
37800	5	37800	1
1495	0	23560	0
35651	1	35883	1
36645	0	4499	0
35863	0	37349	1
30905	5	1333	0
37892	3	37781	1
8110	5	12812	0
37892	2	37069	1
35707	4	15882	0
37878	2	37697	1
10319	9	35205	0
37239	6	36613	1
5248	0	585	0
37206	3	35288	1
5110	8	27010	0
35565	3	35047	1
3423	9	37191	0
35565	6	36248	1
24193	7	5757	0
37403	2	35371	1
32369	9	35139	0
37403	2	35172	1
25174	8	3185	0
34962	2	37114	1
26866	0	12420	0
34962	2	36716	1
37405	9	1130	0
37952	2	36566	1
7273	5	19633	0
37952	2	37534	1
5886	4	25271	0
34767	0	35280	1
30141	2	8916	0
37473	2	35631	1
10038	9	29835	0
37473	2	35955	1
35288	9	35288	0
35772	4	36142	1
10669	1	35707	0
36349	4	35948	1
22500	10	19617	0
35814	3	35091	1
22240	4	10542	0
34956	2	36714	1
9480	3	22500	0
36511	5	36112	1
2259	8	36087	0
37245	6	36521	1
16417	0	24483	0
37333	8	35165	1
35754	3	17678	0
37333	5	36689	1
34129	5	5881	0
37168	0	36386	1
14311	8	7570	0
37168	1	37584	1
34867	1	19257	0
37459	3	36884	1
11007	2	30101	0
35416	2	36071	1
7362	8	23976	0
36849	2	35826	1
35704	7	14760	0
36763	0	34979	1
34918	7	17691	0
35000	0	37408	1
33318	9	2834	0
37731	0	37463	1
13418	8	9232	0
37731	2	34817	1
20590	2	26184	0
37422	0	35896	1
32833	0	34599	0
37873	0	36351	1
2892	5	3950	0
35315	0	34737	1
3423	5	22391	0
36768	0	37904	1
6240	3	21061	0
36446	2	37517	1
29041	7	26439	0
36460	2	36940	1
19542	2	25174	0
37972	3	35241	1
33746	3	7053	0
34910	2	36776	1
11829	2	32353	0
35009	2	37526	1
28067	9	4710	0
35009	2	35007	1
9753	3	19617	0
35009	2	37484	1
33861	0	14022	0
35009	2	37063	1
14485	0	29435	0
35009	2	36129	1
13373	4	31532	0
35009	2	36970	1
13061	6	16003	0
35009	2	35673	1
30129	6	13484	0
35009	2	35217	1
25271	8	35470	0
35009	2	35849	1
22786	8	24402	0
36463	1	36922	1
30141	10	27512	0
37749	0	36365	1
30559	6	1620	0
36041	5	37674	1
37072	3	3190	0
36722	0	37376	1
8356	6	30329	0
37411	0	34762	1
1995	0	28067	0
37835	0	35717	1
10796	10	6240	0
37835	3	36028	1
975	4	23793	0
36332	3	36408	1
35752	3	12579	0
36332	2	37470	1
31900	10	24886	0
37628	2	36194	1
4308	1	30439	0
37481	4	37313	1
12342	6	12410	0
35483	0	36946	1
7168	9	22947	0
35152	2	37208	1
24916	10	13249	0
35125	0	37140	1
36074	5	14400	0
37381	4	35447	1
11293	4	30129	0
37381	2	36944	1
21376	4	1130	0
36230	5	36772	1
3310	9	21376	0
36230	5	35972	1
35139	4	14991	0
36775	4	35856	1
36276	6	8857	0
36318	0	36335	1
9497	3	34803	0
34684	0	37958	1
34318	5	6463	0
34684	2	37596	1
5142	7	31323	0
34684	2	36149	1
29292	4	23153	0
37165	6	35657	1
2482	5	24489	0
37165	6	36067	1
36668	9	7726	0
37165	6	34977	1
2126	0	267	0
37468	0	37849	1
27594	6	15016	0
36617	3	35337	1
15634	5	19039	0
36617	2	34820	1
22740	4	2259	0
35058	4	35030	1
16163	6	4685	0
35240	6	37226	1
12468	6	5248	0
37117	2	35261	1
10059	0	22000	0
37117	2	34919	1
35205	3	4697	0
37171	2	36784	1
37900	6	36276	0
36229	3	36530	1
30101	6	35644	0
36229	6	36344	1
12812	1	13079	0
35448	0	37750	1
35644	3	22240	0
35448	3	35761	1
14400	9	20094	0
36796	0	37014	1
21635	3	37839	0
35799	8	37532	1
8099	10	33986	0
35799	8	37960	1
37768	10	6568	0
35359	0	37654	1
23518	1	21061	0
35359	2	37733	1
13263	2	19362	0
35927	3	34724	1
1049	2	20535	0
35036	9	35369	1
6423	9	9727	0
35036	9	35727	1
23394	7	2626	0
35036	9	35235	1
35205	2	32353	0
35036	9	35444	1
10624	1	23265	0
35036	9	35615	1
5587	6	21335	0
35036	9	35089	1
35867	3	29440	0
35036	9	34880	1
29268	9	37348	0
35036	9	35952	1
34798	1	15318	0
35036	9	35209	1
21045	6	25271	0
35036	9	35670	1
31900	9	22533	0
35036	9	36140	1
29835	10	28427	0
35036	9	34830	1
1678	5	4433	0
35036	9	35368	1
29835	1	10182	0
35036	9	36166	1
16417	2	36648	0
35036	9	37524	1
18907	5	27594	0
35036	9	37688	1
5432	4	8849	0
35036	9	34685	1
34675	1	15074	0
35036	9	34617	1
2911	4	5847	0
35036	9	36620	1
8904	1	23945	0
35036	9	37970	1
29471	6	16123	0
35036	9	35171	1
12188	4	18579	0
35036	9	36020	1
4697	0	32866	0
35036	9	36703	1
24916	9	22174	0
35036	9	36831	1
23980	8	9034	0
35036	9	35842	1
18967	9	34588	0
35036	9	36510	1
27020	8	23980	0
35036	9	37493	1
24957	10	99	0
35036	9	35903	1
19039	3	1049	0
36304	0	35857	1
31301	10	17678	0
36180	5	36825	1
35139	5	15905	0
36180	5	36236	1
37322	0	8703	0
37171	2	35917	1
30469	2	35982	0
37802	0	36936	1
1673	6	6081	0
35477	0	37032	1
1333	8	36598	0
35477	4	36977	1
3423	8	10446	0
37309	0	35349	1
12421	0	1495	0
35245	0	37142	1
34819	1	8922	0
35055	2	36866	1
5587	6	1632	0
36881	0	36813	1
21802	10	28211	0
35344	6	37916	1
20590	9	21666	0
34593	0	37639	1
20590	6	30948	0
35224	0	37858	1
1049	0	37596	0
35827	4	36514	1
23825	1	22654	0
35827	2	35589	1
37122	9	12767	0
36893	8	37732	1
29530	7	21062	0
36893	4	36918	1
11140	6	35982	0
37392	0	35282	1
35064	8	13234	0
37392	6	34942	1
12079	4	12468	0
35566	0	37205	1
26928	7	1495	0
37902	0	37536	1
30199	2	13651	0
35201	2	36725	1
19682	5	13263	0
34744	0	35577	1
22240	1	33986	0
34744	3	36439	1
10435	8	34675	0
36791	2	36086	1
4890	5	19633	0
36791	2	35306	1
31813	7	28063	0
36728	2	36875	1
5197	8	8762	0
36728	2	36789	1
7042	3	23510	0
36559	1	36138	1
25077	2	36088	0
35789	3	34710	1
35064	2	15749	0
35789	6	36364	1
36337	3	1130	0
37770	0	37820	1
7273	5	19633	0
37770	3	37180	1
6568	6	2911	0
37799	0	34804	1
12200	4	3461	0
35763	0	36965	1
34918	10	30455	0
35763	3	35743	1
21431	10	12421	0
37160	4	36675	1
7726	6	29268	0
37407	0	36578	1
1620	6	30456	0
37407	6	37678	1
34726	7	26454	0
35460	0	36126	1
29292	7	21177	0
34871	5	37644	1
35288	2	17024	0
34776	4	35605	1
3950	9	22533	0
36474	4	37624	1
9107	0	33543	0
37566	0	35691	1
31323	1	30141	0
37566	2	35456	1
25077	3	9836	0
37566	2	36062	1
23894	8	37101	0
37566	2	37795	1
25859	6	25407	0
35664	10	35312	1
22265	10	22265	0
35664	5	34679	1
37384	7	37384	0
35505	0	36367	1
793	5	37651	0
37505	0	35087	1
13201	5	12079	0
35476	0	36778	1
32300	0	4065	0
35476	2	35634	1
26142	5	19633	0
35476	2	35601	1
37348	10	2001	0
35476	2	34757	1
30469	9	31122	0
36972	3	36345	1
20834	9	30905	0
36972	6	35875	1
25407	6	37322	0
34755	3	35779	1
7809	3	25703	0
37842	1	35569	1
24193	1	36403	0
34650	0	37640	1
17220	7	8703	0
37521	0	36497	1
1997	5	24957	0
37521	3	36031	1
28211	7	32610	0
37521	6	34954	1
37623	1	18381	0
37521	6	37197	1
14311	8	12280	0
37521	6	36185	1
8762	9	6859	0
37521	6	37727	1
24957	6	8179	0
37521	6	35726	1
35139	6	32833	0
35915	5	36117	1
14374	10	35464	0
35311	6	34838	1
30101	3	25077	0
37803	0	34868	1
32617	4	37101	0
35258	6	37026	1
23394	1	7809	0
37412	3	35507	1
449	7	15656	0
35675	3	34980	1
5757	6	10955	0
37453	2	37444	1
15749	5	6593	0
35923	3	36217	1
30439	5	12079	0
35419	0	36399	1
123	8	16361	0
35455	5	37359	1
7570	9	7905	0
34914	2	36050	1
9706	4	23507	0
37940	6	35957	1
20390	9	9753	0
35992	0	35919	1
28525	10	8356	0
36402	0	37376	1
4697	0	32353	0
37023	5	37847	1
11140	0	16870	0
35711	2	35521	1
34679	3	6187	0
36432	2	36157	1
32353	5	35245	0
37724	2	36466	1
5212	5	22265	0
37724	2	34843	1
10706	1	12342	0
37724	2	36462	1
27512	6	1540	0
37724	2	35791	1
12579	6	18623	0
37724	2	37291	1
17691	3	28949	0
36736	8	34879	1
31422	7	34759	0
36736	5	35597	1
29471	10	15891	0
36736	5	36589	1
6188	10	6188	0
35417	2	34790	1
4065	10	35893	0
37429	3	35119	1
11829	3	21006	0
34833	4	37896	1
4845	6	27661	0
36642	0	34686	1
26117	4	30141	0
36642	4	35205	1
7754	1	6230	0
37698	0	34626	1
2482	9	5248	0
37698	2	35191	1
16417	2	27661	0
37698	2	35939	1
26439	0	17355	0
37698	2	35023	1
18967	2	34679	0
37698	2	37146	1
10435	9	21666	0
37698	2	36495	1
5310	3	19202	0
37698	2	36023	1
28949	4	7273	0
37698	2	34735	1
19633	6	19633	0
37698	2	35667	1
1995	3	37534	0
37698	2	35166	1
22527	5	25271	0
37698	2	34760	1
30141	7	34803	0
37698	2	35355	1
21028	5	3944	0
37698	2	37637	1
37348	6	32300	0
37698	2	36419	1
22240	2	9836	0
37698	2	37859	1
15169	2	10038	0
37698	2	37543	1
10133	5	32032	0
37698	2	37745	1
24886	3	23290	0
37698	2	37537	1
7726	10	32371	0
37698	2	37172	1
36415	4	26487	0
37698	2	37228	1
12410	4	32617	0
37698	2	34623	1
12579	9	34798	0
37698	2	34746	1
15318	9	21808	0
37698	2	35344	1
10335	6	23518	0
37698	2	36082	1
9009	5	29782	0
37698	2	36254	1
33091	10	4065	0
37698	2	35274	1
34644	2	6463	0
37698	2	36549	1
14037	7	36531	0
37698	2	37249	1
18312	2	13079	0
36209	3	36331	1
15749	7	11154	0
[truncated: 698 more rows]
