# Supplementary material
Source: ML conference proceedings conference paper supplement (https://proceedings.neurips.cc/paper_files/paper/2021/hash/0fd600c953cde8121262e322ef09f70e-Abstract.html)
Supplement: Supplementary file 1 [file 0fd600c953cde8121262e322ef09f70e-Supplemental.zip › Supplementary_Material_Paper_8745/data/Hamaguchi-BM_both-3000/test/test-random-sample/test8.txt]

37705	0	37801	1
7168	3	25271	0
37549	2	36299	1
2001	3	25837	0
37220	2	36370	1
12307	8	14229	0
35926	0	34619	1
19721	3	30012	0
37071	6	37492	1
26316	8	1063	0
37071	6	37233	1
22240	1	32123	0
37071	2	37824	1
14374	1	14400	0
37071	6	35341	1
29789	4	9009	0
37071	6	34753	1
34396	9	14229	0
37071	6	36560	1
35752	7	4685	0
37071	6	37193	1
5854	2	35202	0
37071	6	36256	1
22740	8	17101	0
37071	6	37306	1
13373	7	11149	0
37131	8	36838	1
2271	9	35897	0
35559	0	34898	1
31777	10	7372	0
35559	6	35364	1
29435	0	35245	0
36523	0	36682	1
11098	2	9571	0
36523	3	35987	1
32610	2	30082	0
34741	9	36177	1
25001	10	36338	0
34644	6	35080	1
34839	8	12180	0
36187	6	36167	1
19682	7	14037	0
36027	0	36802	1
30058	8	13098	0
37621	0	37746	1
9905	10	28062	0
37621	2	36225	1
12651	2	4271	0
34965	5	37568	1
28211	10	8922	0
34965	5	36383	1
34819	7	25407	0
34965	5	36252	1
32247	5	28906	0
37039	4	36609	1
35321	10	18237	0
37153	1	34941	1
31416	0	5909	0
34865	4	36960	1
36704	8	7149	0
36577	3	37165	1
25	8	975	0
36657	0	37857	1
30445	10	15016	0
35490	2	35668	1
30469	4	15252	0
35256	2	36742	1
5314	10	9905	0
35256	2	37767	1
34803	6	30141	0
36724	1	37946	1
24483	0	24483	0
36471	0	37257	1
24662	7	15169	0
36471	2	36706	1
11149	0	11154	0
36471	2	36333	1
36823	9	13418	0
37099	0	37780	1
35205	0	31733	0
36653	5	35964	1
37504	2	18881	0
36479	4	35942	1
32066	10	25856	0
37285	1	37885	1
14361	2	7726	0
34961	3	34907	1
5310	8	14374	0
37839	9	34648	1
24986	3	3833	0
37025	0	36719	1
1547	4	36110	0
36374	0	35978	1
8951	7	18665	0
36374	3	36697	1
3537	8	22275	0
36374	6	35358	1
29360	9	29543	0
35319	1	37938	1
31250	10	37768	0
35105	0	34743	1
24916	1	34759	0
37796	6	35046	1
36909	6	668	0
34731	2	36231	1
31331	4	30308	0
34731	2	36911	1
6463	2	29971	0
34731	2	37936	1
35867	3	1388	0
34731	2	36442	1
34923	2	2892	0
34731	2	37383	1
19617	7	11367	0
34731	2	36720	1
31994	10	24725	0
34731	2	35179	1
18150	2	22609	0
37622	0	35717	1
29761	2	37768	0
37004	1	37252	1
10824	8	27527	0
36635	2	34647	1
18967	9	10796	0
34995	2	37811	1
13956	7	34803	0
35977	3	36153	1
26792	3	37764	0
35893	6	37582	1
22275	8	10133	0
35893	6	36458	1
20478	6	35342	0
35893	6	35777	1
12079	9	21802	0
35893	6	35845	1
25859	9	1333	0
35893	6	36987	1
21028	6	37083	0
37360	0	34975	1
24483	10	33543	0
36245	0	36640	1
7168	6	19721	0
35644	2	34911	1
27481	7	33864	0
37415	3	37190	1
37535	4	28906	0
36591	0	37698	1
34599	3	25150	0
35095	6	35639	1
2	6	27997	0
37719	2	34578	1
4106	3	17691	0
35377	2	34856	1
25271	9	25148	0
35377	2	37957	1
9889	7	22609	0
35377	2	35151	1
30954	8	32247	0
35377	2	35540	1
35064	6	15749	0
35377	2	35289	1
21006	1	35205	0
36501	2	37179	1
2911	7	8356	0
37939	2	35006	1
32138	2	35465	0
37553	0	36802	1
17449	8	25150	0
35513	3	35788	1
32617	4	12421	0
36616	3	37088	1
22609	9	6447	0
36348	0	36604	1
21177	10	35354	0
36046	2	37908	1
22500	7	14361	0
35462	3	35393	1
9706	4	36415	0
35462	6	37132	1
35932	0	22453	0
35462	6	34855	1
35245	0	1620	0
35462	6	37500	1
37768	9	17691	0
35462	6	35816	1
27005	0	29519	0
35462	6	35704	1
12180	9	33788	0
35462	6	36457	1
37764	10	13954	0
35462	6	35157	1
13249	4	31172	0
35462	6	35454	1
6859	7	30469	0
35462	6	35746	1
1502	8	6518	0
35462	6	35020	1
13234	2	21431	0
37375	0	35907	1
9352	7	1349	0
35353	2	35014	1
28062	6	26451	0
34854	0	36578	1
30642	6	32859	0
35192	0	37849	1
15518	2	1823	0
36011	0	37408	1
4710	0	37510	0
37681	6	36359	1
13263	7	1102	0
35499	5	37963	1
15169	4	1678	0
35499	9	37498	1
7402	3	35288	0
35314	2	36042	1
4605	0	30082	0
35314	2	35399	1
22527	2	26981	0
35121	3	34842	1
32617	4	23894	0
37107	0	35635	1
99	6	30199	0
37107	1	34881	1
1620	7	1620	0
35198	2	35588	1
18150	5	10612	0
37649	5	34825	1
8493	2	34839	0
35671	4	37152	1
37623	2	35214	0
35387	2	36767	1
15318	6	8703	0
35092	6	36862	1
267	9	10796	0
35092	6	36611	1
19542	8	29519	0
36037	4	37910	1
24402	7	2001	0
36292	0	36232	1
18881	4	37391	0
37504	1	35569	1
16163	1	32234	0
35858	0	35180	1
11092	2	11092	0
35250	0	35147	1
33861	0	4619	0
36712	0	36762	1
25271	2	11883	0
35018	4	36683	1
13262	6	31607	0
35687	6	36443	1
36337	1	5212	0
37759	3	35834	1
14187	0	37651	0
35981	0	35541	1
30850	9	20290	0
36410	0	37415	1
3537	7	23600	0
37638	8	34653	1
37764	3	6581	0
37638	1	35991	1
37526	2	12280	0
36361	0	36719	1
20936	9	123	0
36361	3	37929	1
37032	7	17355	0
37495	2	37626	1
17291	7	35932	0
37495	2	35512	1
5881	7	14374	0
34769	0	37361	1
26439	5	34129	0
37918	2	35808	1
5909	1	7149	0
36898	0	35857	1
21660	5	13262	0
36909	4	36316	1
8951	7	36470	0
35908	0	37324	1
31331	3	27228	0
36512	2	36046	1
29789	5	9107	0
35563	0	36232	1
7662	4	9352	0
35805	0	36709	1
8099	9	123	0
37754	8	34879	1
585	4	4685	0
37754	5	36073	1
7149	1	37535	0
37010	2	36103	1
36059	5	12079	0
36053	2	36026	1
14361	7	29837	0
36053	2	37730	1
37068	2	17291	0
37167	0	37640	1
19202	2	8058	0
37167	6	37863	1
33986	9	13651	0
36957	2	37832	1
3417	1	16029	0
36994	6	36897	1
30456	5	30559	0
36403	4	36403	1
6240	8	31334	0
35008	6	34717	1
22129	8	37034	0
36160	4	36182	1
4752	6	19217	0
35526	0	36674	1
22500	1	648	0
35318	0	36547	1
12420	8	33864	0
35147	2	37880	1
6230	3	10435	0
35147	2	34687	1
1678	9	34588	0
34740	0	37718	1
32300	5	29268	0
37744	3	36981	1
3020	1	26981	0
35636	1	37218	1
6988	10	23825	0
34960	2	37015	1
6768	6	7683	0
34960	2	36137	1
9009	6	13369	0
34960	2	37734	1
1130	4	9009	0
35998	9	37454	1
33318	10	20590	0
36880	1	37798	1
5846	9	31323	0
35238	4	37048	1
23828	6	5928	0
35099	9	36405	1
22527	2	31607	0
35099	9	37844	1
31607	3	25148	0
35099	9	35926	1
12420	0	6230	0
36488	5	35524	1
15882	4	35648	0
34690	3	36414	1
25	1	16040	0
36435	5	36051	1
22020	9	6518	0
36759	5	35327	1
35288	3	20631	0
34579	2	34847	1
12079	2	10669	0
34904	9	36575	1
1349	0	24	0
36207	0	37536	1
27495	9	8121	0
37891	0	37147	1
31813	7	30559	0
35414	5	35136	1
12121	9	5846	0
36746	8	36548	1
20546	4	22714	0
36293	5	35757	1
21135	10	29041	0
34928	0	36719	1
31554	8	24957	0
36843	0	36719	1
17931	5	29114	0
36807	0	35465	1
36704	0	4230	0
34805	2	36941	1
30370	3	9889	0
37013	3	37682	1
8356	4	1547	0
35913	4	37563	1
36704	0	9586	0
35913	3	36782	1
31413	9	37969	0
35913	5	36822	1
31607	9	449	0
35913	5	35982	1
33298	8	10038	0
36281	0	37348	1
11154	2	31413	0
37914	0	35226	1
17101	6	26454	0
34964	6	34860	1
36110	1	17662	0
34632	4	36032	1
16284	6	30456	0
36437	0	35207	1
9352	5	5909	0
35603	0	35405	1
19039	0	29268	0
37760	0	34836	1
15169	1	5757	0
35693	2	35518	1
31949	0	15848	0
37542	2	36056	1
16827	7	31122	0
37542	2	37726	1
35604	1	23112	0
37579	0	36682	1
22265	5	14400	0
35682	6	37318	1
20936	3	35295	0
35544	4	37894	1
27661	10	23290	0
35544	6	37433	1
15650	6	6285	0
34642	3	36531	1
36531	5	27005	0
34642	2	35578	1
6447	9	12200	0
34642	9	36162	1
35342	1	35321	0
35283	2	37629	1
20514	6	23364	0
35873	3	37298	1
35704	1	5341	0
37056	2	36001	1
1678	9	12079	0
37056	2	37920	1
37122	2	16040	0
37927	2	35062	1
6204	5	24070	0
36013	9	36780	1
11367	8	19633	0
34691	0	35392	1
2892	10	5341	0
37369	6	35640	1
27512	7	1540	0
35467	0	36116	1
11893	6	28262	0
35467	2	35303	1
30905	4	28211	0
35467	2	35669	1
32369	8	30129	0
35467	2	35844	1
32371	5	13061	0
37177	0	36682	1
29543	4	19349	0
36334	0	35032	1
15352	8	37768	0
36334	2	37778	1
20650	8	2540	0
36014	2	36500	1
20623	2	12468	0
37702	0	37138	1
9532	5	37416	0
36268	0	36682	1
3464	3	22654	0
34887	0	34898	1
8762	1	5212	0
37303	0	37698	1
9009	9	31331	0
37303	3	36127	1
5846	0	273	0
37271	1	36224	1
19793	9	37324	0
37497	2	37442	1
34679	2	36074	0
37497	2	35484	1
29114	10	5872	0
36427	2	34884	1
3908	6	20514	0
36427	2	34943	1
9480	6	17712	0
36427	2	36667	1
11876	3	29837	0
36427	2	36279	1
33992	2	33558	0
36427	2	37374	1
24886	2	5197	0
36427	2	36015	1
23202	6	34576	0
36427	2	37038	1
31994	0	29761	0
36427	2	37388	1
30101	1	5835	0
35310	0	36682	1
23980	2	12545	0
35078	0	34734	1
3310	8	35464	0
36077	4	36619	1
32371	2	14361	0
36257	0	36682	1
29519	5	1431	0
36257	6	34666	1
31942	3	18875	0
36257	6	36899	1
35565	6	2892	0
34710	6	37346	1
37348	5	6474	0
34710	6	36234	1
1049	9	1673	0
34710	6	36054	1
20631	2	36823	0
34714	0	34602	1
36113	10	21934	0
35022	2	34637	1
25856	8	13548	0
35022	2	36454	1
25908	2	6423	0
35022	2	35824	1
21006	0	273	0
37077	2	35997	1
31334	9	34819	0
36978	2	36692	1
123	9	22740	0
37090	2	35203	1
36500	1	1547	0
35761	6	35448	1
36567	4	31565	0
36212	3	37808	1
35321	8	29360	0
35388	0	37341	1
6474	0	26827	0
36629	5	37712	1
7726	10	7402	0
34927	8	35215	1
37122	9	10796	0
36266	3	34649	1
1547	3	36668	0
37853	2	37082	1
10680	7	974	0
36379	1	34853	1
28463	7	30101	0
37302	4	34952	1
15790	5	23604	0
37302	2	36949	1
36645	2	273	0
37302	2	36298	1
17678	0	37900	0
37302	5	36984	1
23364	10	35541	0
37302	5	35423	1
22609	10	20546	0
35415	3	34658	1
13954	0	26792	0
34646	6	36715	1
2483	7	21501	0
36175	6	35663	1
2482	9	33298	0
36908	0	37324	1
15016	3	31172	0
36908	2	36945	1
4710	3	5310	0
34766	3	37646	1
26487	1	23584	0
35158	0	37221	1
21135	10	17354	0
37342	4	36255	1
17796	1	36146	0
36469	0	37463	1
15318	0	25859	0
36582	0	34784	1
30370	7	10706	0
35170	0	35621	1
23510	0	27005	0
34694	1	35748	1
4433	2	24935	0
36600	0	34719	1
11149	10	1322	0
37710	2	35164	1
29435	9	6230	0
37344	0	36417	1
3537	5	23980	0
35572	0	36578	1
35055	1	6593	0
35572	6	36810	1
20290	3	32833	0
35572	6	35768	1
32408	2	33298	0
36200	6	34766	1
33513	1	23584	0
36273	0	36103	1
31413	9	18628	0
37515	2	35375	1
20439	6	3908	0
37299	2	37299	1
20094	10	22265	0
34712	0	37971	1
2969	0	31607	0
36638	0	36567	1
14929	8	19109	0
36859	4	34656	1
8144	3	29068	0
35623	6	35749	1
22654	4	34599	0
35623	6	37307	1
6627	9	11829	0
35019	0	35282	1
6518	9	34161	0
37882	2	35123	1
974	10	35009	0
35720	2	35747	1
10150	0	36668	0
36572	0	37386	1
25150	3	3944	0
36572	2	34789	1
22275	7	15656	0
34809	2	36210	1
25150	5	33893	0
34809	2	35289	1
32526	0	11883	0
34809	2	37134	1
24061	7	24061	0
34809	2	34700	1
974	5	33246	0
34809	5	35072	1
9756	0	35805	0
34809	2	35953	1
12280	0	10133	0
35281	0	36905	1
23600	6	21660	0
37184	2	36588	1
5846	2	12568	0
37184	2	37435	1
19542	8	25150	0
35823	0	36232	1
8342	3	2483	0
37035	6	36301	1
34250	7	34250	0
37035	6	36576	1
24489	5	30905	0
37035	6	36626	1
10150	1	2001	0
37035	6	35425	1
31334	8	34471	0
34704	6	36395	1
5580	6	22533	0
36761	4	36135	1
10059	4	23560	0
35427	0	36853	1
35893	5	9232	0
35297	3	36996	1
37768	2	6568	0
35012	4	36686	1
18907	2	34867	0
37185	4	35106	1
17354	4	22533	0
36376	0	35301	1
29150	4	23265	0
36674	0	35833	1
27590	3	24483	0
35852	2	36198	1
33318	8	9706	0
35852	2	37283	1
31607	10	21601	0
35852	2	35299	1
13817	10	13259	0
35852	2	35397	1
35893	9	23112	0
35852	2	36525	1
18381	1	36561	0
35852	2	37079	1
13477	0	8099	0
35852	2	34951	1
5897	2	16333	0
35852	2	36557	1
30370	8	23510	0
35852	2	37031	1
17822	0	31573	0
35852	2	36677	1
36403	6	35648	0
37533	0	36904	1
24	7	33788	0
35187	2	36800	1
5248	1	30027	0
37200	3	35006	1
4271	0	30012	0
35408	9	36081	1
19793	4	11893	0
35408	9	35446	1
13651	7	30199	0
37244	5	35208	1
34644	5	9863	0
35285	2	37091	1
22453	6	23287	0
35290	2	37159	1
17220	1	8922	0
35290	2	35829	1
35867	10	29440	0
35290	2	37642	1
14508	10	4065	0
35742	0	37289	1
36074	4	29789	0
36580	8	35009	1
25908	3	21431	0
35686	3	36804	1
9034	1	29292	0
34636	2	36786	1
5248	4	17545	0
36195	2	36407	1
37839	7	35893	0
35129	3	36028	1
21135	8	27228	0
35101	6	35809	1
24886	1	23265	0
36529	2	37883	1
12209	6	13589	0
36529	2	34797	1
8904	10	29789	0
37810	0	35717	1
15934	10	10955	0
35390	2	36130	1
24662	5	25604	0
35390	2	36985	1
19542	9	1495	0
37783	0	36154	1
8662	10	29543	0
34896	0	35907	1
20834	9	5757	0
34896	3	37491	1
22786	6	2001	0
34942	6	35950	1
27010	10	15518	0
34942	6	36608	1
585	10	1333	0
36836	0	37640	1
17730	4	21635	0
36836	3	36206	1
22500	2	28949	0
35712	2	35951	1
37810	5	895	0
35678	4	34965	1
34396	8	29647	0
35678	5	35664	1
12307	4	12180	0
35678	5	35583	1
36699	8	13410	0
37652	4	35461	1
33001	6	5158	0
36765	4	35382	1
13369	3	37032	0
36765	5	35495	1
16003	8	17024	0
34834	5	36077	1
20936	3	36088	0
35918	2	36424	1
4710	5	37510	0
35426	2	37267	1
5928	1	31172	0
36544	2	37033	1
27481	2	12121	0
36866	0	35055	1
33992	3	37634	0
35662	3	36200	1
21569	10	25271	0
35662	10	37684	1
24483	9	29782	0
35662	5	36416	1
24360	4	24391	0
35802	0	34905	1
29835	10	10669	0
37928	0	36232	1
36403	9	13164	0
37707	4	36237	1
12999	6	13098	0
36448	0	37480	1
11098	3	16361	0
36290	5	36870	1
37068	9	35805	0
37310	3	36637	1
1673	7	9232	0
35778	5	37092	1
9034	8	18834	0
35515	3	37071	1
6859	10	5857	0
37319	2	36106	1
25859	5	25604	0
36132	8	34804	1
35245	8	1540	0
36707	2	34876	1
559	2	16333	0
35795	0	35990	1
23604	7	3908	0
36380	0	35978	1
35648	8	4433	0
36444	3	37382	1
23198	8	36337	0
36258	0	35860	1
26928	5	15905	0
35839	0	37438	1
35965	4	36113	0
37115	0	36562	1
35648	7	4685	0
37214	4	35380	1
16016	10	37384	0
37214	5	37921	1
25407	6	26230	0
35397	6	37353	1
2540	3	15675	0
37130	1	35883	1
32827	9	17822	0
36453	0	36886	1
10706	4	22000	0
36453	5	37051	1
15198	8	6768	0
34780	0	35247	1
9256	9	21061	0
37203	0	37750	1
4605	8	2126	0
35150	0	37611	1
12420	1	3257	0
36604	0	36528	1
35288	7	22500	0
35591	3	36656	1
35963	1	27060	0
37538	2	37296	1
36803	1	34819	0
34786	8	37724	1
15169	1	12079	0
34786	5	36368	1
12188	8	30027	0
37829	2	37253	1
11973	10	8110	0
37829	2	36936	1
6518	9	36470	0
34707	2	36145	1
13373	6	17449	0
34707	2	36204	1
12280	1	35470	0
37150	0	37743	1
35464	1	32783	0
35137	3	34583	1
5872	6	32066	0
37322	2	37012	1
31813	6	4945	0
36397	2	37769	1
4890	5	37768	0
34951	3	36017	1
22626	0	17730	0
37653	1	34808	1
10319	1	12121	0
36569	2	35545	1
19257	5	30445	0
36569	2	36143	1
26316	0	17101	0
37339	0	35907	1
16735	2	24827	0
36328	3	37209	1
23828	10	31422	0
36328	6	34644	1
12391	9	37391	0
36328	6	36850	1
20546	5	27060	0
36328	6	35935	1
29530	7	8064	0
36587	0	34668	1
36028	5	9480	0
36992	0	37487	1
18312	9	19709	0
36347	0	35575	1
4308	1	15882	0
37840	2	36752	1
7709	7	10133	0
35921	0	36578	1
30329	10	11367	0
37287	3	36076	1
5067	2	13956	0
34604	5	35855	1
16411	2	26981	0
34604	5	34756	1
7402	0	394	0
35538	0	37640	1
1547	1	26827	0
34749	2	37312	1
32897	6	17037	0
36280	2	36955	1
2911	8	648	0
36690	8	34879	1
23584	9	34803	0
36690	5	36073	1
29114	0	412	0
36690	5	35996	1
11083	3	12375	0
37334	2	34699	1
5909	2	32247	0
36550	5	37240	1
18150	2	15749	0
37057	0	36303	1
9107	1	9107	0
34878	2	37561	1
12121	4	9706	0
36717	6	36967	1
31607	4	25148	0
34875	0	34963	1
29519	3	9889	0
34615	3	37462	1
23604	10	26217	0
34615	6	37076	1
37171	5	32919	0
36381	0	37496	1
20439	4	12375	0
34783	3	37311	1
12999	4	2834	0
34783	6	35598	1
31994	6	25837	0
34783	6	37809	1
16040	7	12188	0
36697	6	36374	1
1632	1	21569	0
36697	6	35961	1
15352	7	23218	0
36499	0	34749	1
5854	8	20439	0
35094	2	37334	1
11829	6	33861	0
37782	2	37551	1
37651	10	35055	0
37782	2	37757	1
36415	0	26866	0
35113	6	36643	1
7441	10	22275	0
36389	0	36465	1
974	1	35419	0
36389	2	37696	1
18881	4	18881	0
36389	2	37028	1
3464	7	33893	0
34662	3	34726	1
22265	6	22391	0
37174	2	35916	1
24827	0	21660	0
36595	2	34995	1
32919	6	37008	0
34734	2	37188	1
37391	10	37391	0
37889	2	37901	1
16123	0	5881	0
35061	2	35930	1
27242	3	21208	0
37427	0	36188	1
1333	0	12280	0
36458	6	37416	1
22173	8	36704	0
36070	0	35852	1
12468	6	10038	0
36426	3	35536	1
32123	3	13651	0
37007	6	36196	1
20390	0	13418	0
35500	4	37152	1
4710	5	32859	0
35361	2	37137	1
37564	3	7905	0
35361	2	37089	1
13954	5	30642	0
35219	5	35585	1
23794	2	5847	0
34633	2	34975	1
33001	4	33992	0
36475	0	36824	1
15905	1	15749	0
36764	3	36797	1
26928	0	15749	0
35028	2	35043	1
21135	8	27590	0
35028	2	36563	1
30469	10	21376	0
35028	2	34640	1
12410	4	9727	0
35803	0	35960	1
26165	10	26654	0
35141	0	35731	1
4685	6	15169	0
35522	2	36929	1
37034	2	20695	0
36495	3	36439	1
14022	10	26866	0
37223	0	36778	1
29936	2	1997	0
36605	5	36285	1
2483	10	35321	0
36605	5	35220	1
15016	5	16029	0
36605	10	37687	1
31900	8	27990	0
37643	3	36966	1
2	1	27228	0
35798	0	37607	1
12188	0	12468	0
34807	0	36934	1
22275	0	337	0
37005	0	36896	1
33737	3	25407	0
37437	4	37059	1
9586	0	7742	0
35449	0	36469	1
34474	8	34576	0
36551	0	37709	1
20290	6	17057	0
36551	5	34800	1
6568	2	7003	0
36679	0	37895	1
9836	4	37825	0
36679	0	37720	1
7618	10	6627	0
37659	6	37111	1
35064	8	22000	0
37170	6	36039	1
22070	9	35604	0
37627	2	34734	1
10446	1	37191	0
37627	2	35681	1
35707	10	23518	0
37627	2	35684	1
17545	5	17545	0
37046	0	35632	1
20148	1	27495	0
37046	2	37455	1
35893	3	35893	0
37046	2	35142	1
32300	8	32371	0
37046	2	36913	1
36991	0	7168	0
37046	2	36055	1
4271	2	16735	0
37046	2	37330	1
13375	3	24986	0
36368	5	34727	1
24391	1	22740	0
36368	5	36434	1
5886	9	9034	0
36368	5	35184	1
14570	7	21006	0
36368	5	36468	1
15547	0	35202	0
36218	0	36708	1
10612	7	35139	0
36120	2	36233	1
9586	1	37416	0
36120	2	34575	1
16411	7	17796	0
36478	6	36217	1
22533	8	5341	0
35033	3	36028	1
15518	2	3950	0
34596	5	34595	1
9537	1	9898	0
36481	1	37584	1
9863	2	11098	0
36827	3	35845	1
14361	1	13418	0
36082	0	37698	1
37032	0	9009	0
34594	0	35103	1
9497	8	36645	0
34594	9	37576	1
8904	5	37032	0
34594	9	36506	1
18628	6	30129	0
36235	0	37789	1
36561	1	1102	0
37728	5	35739	1
11883	9	30642	0
35445	2	37029	1
36074	2	36648	0
35445	2	35132	1
29971	10	36088	0
37451	0	36493	1
21660	4	7709	0
37084	6	37434	1
10150	4	23218	0
35037	2	37507	1
12568	10	4752	0
37207	2	36622	1
33788	8	34570	0
36096	4	37910	1
11829	10	4697	0
35391	5	35502	1
16894	2	37113	0
35391	10	35699	1
18467	8	35465	0
35573	0	35525	1
30928	1	975	0
36664	0	36803	1
33298	3	13164	0
35548	0	35938	1
31813	2	11829	0
35548	2	36857	1
9753	7	29761	0
35690	0	36312	1
21548	9	9706	0
35602	0	36043	1
1995	4	21177	0
36276	0	35197	1
26117	2	19217	0
37072	3	36028	1
8099	10	3417	0
34924	5	37572	1
21061	9	27741	0
36687	6	36680	1
23287	4	8121	0
37735	0	37658	1
26792	5	6581	0
37735	2	35649	1
37630	8	20439	0
36999	3	35764	1
34675	9	3257	0
37850	0	36274	1
12391	6	31934	0
37850	2	37666	1
35719	10	16361	0
36375	0	35032	1
27242	2	18700	0
36700	3	34748	1
20535	4	6568	0
34752	0	37361	1
1632	7	27020	0
35171	1	35036	1
6474	0	36823	0
37854	0	36429	1
26142	3	20390	0
37854	2	35395	1
7815	3	24957	0
36060	3	37951	1
1547	5	6568	0
37027	3	35153	1
20064	1	1333	0
34813	0	34703	1
15905	7	32369	0
34713	0	37376	1
27590	9	27590	0
35403	0	34764	1
34803	10	5142	0
35403	3	35845	1
6081	9	36668	0
37112	0	36035	1
12420	3	14485	0
37112	4	34601	1
37622	1	1063	0
34840	0	34806	1
37535	9	37535	0
36152	2	36785	1
13799	1	27594	0
36152	5	35252	1
7742	1	22020	0
36959	0	35357	1
29435	1	9898	0
36246	1	35560	1
6859	5	3950	0
37247	4	35846	1
11883	10	7905	0
37329	0	37315	1
15108	9	35009	0
37858	0	36485	1
37637	0	30501	0
36114	2	37395	1
21569	4	29440	0
37588	0	37443	1
14012	4	31607	0
35562	4	35831	1
2834	5	9898	0
37545	0	35812	1
37630	1	21208	0
34867	0	36719	1
6568	5	24061	0
36774	2	35260	1
36470	10	14229	0
35404	0	36278	1
8342	6	23534	0
37347	0	37348	1
33986	1	22968	0
35840	0	35713	1
15650	10	14374	0
35840	3	35194	1
25077	9	30129	0
35976	0	36634	1
12079	0	25	0
36890	1	37094	1
26230	7	4685	0
35848	0	34734	1
6240	1	37322	0
35479	0	35004	1
12767	8	6240	0
36282	5	34816	1
36645	5	36645	0
36002	1	35025	1
37068	4	3833	0
36447	6	35966	1
10612	9	37969	0
34794	2	36658	1
23394	3	23394	0
34794	2	36241	1
35419	8	22129	0
37673	0	37665	1
15268	5	11140	0
34839	6	36885	1
5587	7	8795	0
37691	2	36317	1
26629	5	9732	0
35948	0	36363	1
32610	8	15198	0
35948	1	35883	1
12420	8	27481	0
34889	0	36590	1
32369	2	37083	0
36124	4	34848	1
37619	10	36668	0
37527	0	37519	1
21335	0	14012	0
35464	0	37738	1
5872	8	3833	0
37793	3	35574	1
4499	10	21062	0
37793	6	34726	1
21335	10	23980	0
37946	2	34798	1
24986	7	37068	0
37946	9	35600	1
30012	10	36416	0
37946	9	36658	1
12200	4	12002	0
37946	9	37169	1
6783	8	11893	0
35069	2	36543	1
16361	3	8099	0
35069	2	37139	1
22997	3	8121	0
37646	6	36511	1
28510	7	9256	0
37646	6	35628	1
5314	5	34474	0
35360	0	36260	1
19542	7	19682	0
35769	2	36302	1
36028	3	29761	0
35413	0	36222	1
30905	8	15318	0
35413	2	35398	1
10335	10	34451	0
35362	0	36719	1
14508	2	25837	0
37567	4	35289	1
30061	0	31119	0
36747	0	36014	1
34318	8	33746	0
36118	8	35920	1
17913	1	11149	0
36384	0	35231	1
21376	9	5110	0
34950	0	36044	1
28062	7	412	0
35956	5	36136	1
34644	1	13249	0
35956	5	37118	1
20733	7	11007	0
35109	0	35278	1
22786	4	11876	0
35109	3	35506	1
28211	0	8922	0
35881	2	37805	1
32138	2	32600	0
37201	8	35865	1
3950	1	8904	0
37201	4	35391	1
2595	6	13511	0
36571	0	36853	1
1673	10	17662	0
36571	2	36012	1
37324	10	18881	0
36571	2	35775	1
17101	4	13651	0
35700	4	35106	1
12180	7	26778	0
35700	9	37436	1
8342	7	32827	0
37871	2	36533	1
32681	4	16735	0
37887	5	35970	1
37535	7	31416	0
37887	5	37906	1
7402	1	19039	0
35272	0	35946	1
28063	3	8064	0
35703	1	35883	1
18858	3	26487	0
37196	2	35528	1
34599	8	17449	0
37140	2	36394	1
37326	10	15848	0
36723	3	37071	1
7815	3	24957	0
36649	0	35770	1
30905	7	4685	0
37658	2	37735	1
32827	7	15186	0
37642	2	36607	1
2969	4	7570	0
37642	2	36069	1
779	7	27242	0
34978	6	35891	1
17291	10	35419	0
36873	0	35547	1
31119	9	35648	0
37326	8	35128	1
34539	8	8709	0
37001	4	34823	1
15518	5	29789	0
37421	0	37173	1
37072	10	1995	0
36003	8	36838	1
11182	10	5846	0
37925	9	37815	1
31733	0	6627	0
34918	6	36428	1
8916	7	6627	0
35052	3	34799	1
12767	1	2126	0
37232	0	36509	1
34803	5	1287	0
35254	6	35204	1
36210	0	9836	0
35276	2	36387	1
3190	8	9034	0
34810	0	35717	1
3537	5	35867	0
35680	3	37431	1
37619	3	2595	0
35661	0	37495	1
25538	4	65	0
34737	2	34939	1
23560	2	1495	0
37843	0	36612	1
26184	9	14485	0
34628	0	37044	1
2126	5	12468	0
35822	4	37563	1
9497	3	16284	0
35822	5	35689	1
5909	9	32919	0
35822	5	34785	1
29114	0	18237	0
37971	0	34864	1
11293	4	2259	0
35127	0	36578	1
5248	6	18579	0
35913	3	37120	1
35752	5	12188	0
36921	1	36930	1
31554	4	8857	0
37125	2	34777	1
15547	8	12307	0
34729	0	36314	1
8762	1	4845	0
36010	0	34764	1
35419	5	37504	0
35366	0	35852	1
20554	7	5248	0
36553	9	34974	1
35604	9	37768	0
36553	9	35546	1
1620	9	6230	0
37058	3	36758	1
21569	1	16411	0
35379	5	35813	1
11303	1	22129	0
36606	0	36341	1
24777	7	18312	0
37440	0	37376	1
37630	5	17148	0
34716	0	37101	1
29936	1	123	0
36969	0	35226	1
17024	0	10150	0
36969	6	36192	1
31934	1	32827	0
36969	6	34659	1
29041	4	37032	0
34912	3	37585	1
22129	6	29543	0
34955	3	35230	1
34576	3	5314	0
36995	6	35278	1
37101	1	3634	0
35579	0	34898	1
2483	3	37391	0
35356	0	37251	1
21501	0	21501	0
35181	4	36351	1
17101	5	31172	0
36956	5	36191	1
30642	8	13262	0
37903	0	37408	1
14760	3	5197	0
36119	2	34660	1
18643	1	29471	0
34946	6	37426	1
14231	10	5854	0
37321	6	36406	1
26629	10	24886	0
37592	6	36756	1
6627	7	18124	0
37237	5	35156	1
2827	2	29425	0
36440	0	35160	1
19682	6	22714	0
35771	0	35473	1
28262	4	13375	0
37279	0	35302	1
33001	0	35113	0
35402	0	36792	1
11007	10	34867	0
36277	4	35722	1
3634	8	35055	0
36277	4	34862	1
8356	2	25001	0
36910	0	36232	1
12375	9	36909	0
36910	3	34981	1
35053	2	37768	0
35070	6	37336	1
17008	8	23153	0
35785	6	35771	1
29835	7	17220	0
36411	0	35263	1
35321	2	8024	0
36125	0	36554	1
29536	7	37535	0
36125	2	35162	1
4845	4	11140	0
34971	0	37616	1
30648	1	21062	0
34971	2	37053	1
9107	1	27990	0
36925	2	35345	1
14374	8	16827	0
35296	2	37848	1
6187	6	6768	0
36705	0	36682	1
13061	2	37723	0
36092	0	35590	1
36699	9	26981	0
37262	0	35756	1
8709	0	31422	0
36552	3	34981	1
27590	5	23198	0
36307	3	36811	1
9034	0	16735	0
36307	2	35265	1
6581	7	23153	0
36307	2	36915	1
21501	6	18881	0
36307	2	36215	1
34819	6	24662	0
36307	2	36839	1
25859	3	34798	0
36307	2	37669	1
24827	9	4710	0
36409	0	36578	1
28396	4	20439	0
36409	6	35939	1
36059	0	12079	0
36845	2	36213	1
23534	9	35342	0
36648	3	36031	1
7372	10	9706	0
36648	6	35716	1
12002	2	30850	0
36648	6	35931	1
32247	2	27242	0
36648	6	37954	1
10133	7	15656	0
37301	0	36601	1
16123	4	4845	0
35724	0	35736	1
30905	3	2482	0
37694	2	37571	1
5886	0	29440	0
36202	5	36333	1
29837	8	36110	0
35665	8	36942	1
17730	6	4230	0
36819	4	36819	1
10706	2	1495	0
35232	0	37068	1
35214	8	31532	0
35232	4	36385	1
35214	7	20546	0
34726	3	37793	1
18834	6	30851	0
34739	2	37207	1
9753	4	26827	0
37973	3	36835	1
13259	3	7152	0
37002	3	36814	1
13061	2	36500	0
37635	2	37753	1
10446	5	22533	0
37116	3	37126	1
7149	9	36157	0
37800	3	36275	1
21045	3	37764	0
37800	5	37800	1
26117	6	1602	0
35651	1	35883	1
11140	6	27661	0
35863	0	37349	1
12180	8	28906	0
37892	3	37781	1
35214	6	793	0
37892	2	37069	1
23290	5	30308	0
37878	2	37697	1
37619	4	19633	0
37239	6	36613	1
9863	8	35754	0
37206	3	35288	1
15848	3	31416	0
35565	3	35047	1
14037	6	9727	0
35565	6	36248	1
34451	1	35752	0
37403	2	35371	1
13548	4	29360	0
37403	2	35172	1
26142	1	29761	0
34962	2	37114	1
13817	8	36645	0
34962	2	36716	1
5847	9	2001	0
37952	2	36566	1
28525	2	4106	0
37952	2	37534	1
4105	10	28510	0
34767	0	35280	1
31843	9	5341	0
37473	2	35631	1
30141	6	34803	0
37473	2	35955	1
12391	8	10564	0
35772	4	36142	1
5314	2	35419	0
36349	4	35948	1
23218	10	20144	0
35814	3	35091	1
17291	6	11893	0
34956	2	36714	1
7152	0	21666	0
36511	5	36112	1
18150	6	31532	0
37245	6	36521	1
2531	7	30851	0
37333	8	35165	1
22654	0	6988	0
37333	5	36689	1
15198	7	34471	0
37168	0	36386	1
22129	10	20695	0
37168	1	37584	1
33001	6	35113	0
37459	3	36884	1
30850	6	15749	0
35416	2	36071	1
24402	9	17691	0
36849	2	35826	1
17057	0	32940	0
36763	0	34979	1
1495	5	19875	0
35000	0	37408	1
6474	3	21635	0
37731	0	37463	1
6768	9	33298	0
37731	2	34817	1
6116	7	24886	0
37422	0	35896	1
2969	0	6285	0
37873	0	36351	1
15858	0	12002	0
35315	0	34737	1
37384	2	2595	0
36768	0	37904	1
35752	7	4685	0
36446	2	37517	1
17057	6	22714	0
36460	2	36940	1
15108	3	18467	0
37972	3	35241	1
37810	4	17291	0
34910	2	36776	1
37825	5	36210	0
35009	2	37526	1
34926	4	34839	0
35009	2	35007	1
35342	1	31934	0
35009	2	37484	1
24827	5	2969	0
35009	2	37063	1
31172	8	17892	0
35009	2	36129	1
7742	10	31949	0
35009	2	36970	1
17822	7	11303	0
35009	2	35673	1
12200	1	793	0
35009	2	35217	1
7809	1	32783	0
35009	2	35849	1
7742	8	30954	0
36463	1	36922	1
29835	4	34588	0
37749	0	36365	1
14187	8	11149	0
36041	5	37674	1
35354	10	12280	0
36722	0	37376	1
6627	0	6230	0
37411	0	34762	1
24827	7	29440	0
37835	0	35717	1
7570	2	3020	0
37835	3	36028	1
14374	2	16894	0
36332	3	36408	1
25	6	25604	0
36332	2	37470	1
29536	9	9586	0
37628	2	36194	1
26184	5	23507	0
37481	4	37313	1
10542	9	36087	0
35483	0	36946	1
17037	0	34250	0
35152	2	37208	1
21548	4	30648	0
35125	0	37140	1
13098	0	13259	0
37381	4	35447	1
20478	7	2483	0
37381	2	36944	1
12769	5	3464	0
36230	5	36772	1
37416	4	12180	0
36230	5	35972	1
29761	5	28672	0
36775	4	35856	1
27242	1	11083	0
36318	0	36335	1
7754	2	23584	0
34684	0	37958	1
7709	2	4414	0
34684	2	37596	1
31119	2	36074	0
34684	2	36149	1
9863	4	34929	0
37165	6	35657	1
26928	0	22609	0
37165	6	36067	1
22219	5	32827	0
37165	6	34977	1
8342	2	37034	0
37468	0	37849	1
20514	0	5854	0
36617	3	35337	1
16029	5	22174	0
36617	2	34820	1
7003	5	26827	0
35058	4	35030	1
32783	3	23915	0
35240	6	37226	1
13259	5	32353	0
37117	2	35261	1
27661	10	15891	0
37117	2	34919	1
31843	2	29041	0
37171	2	36784	1
36157	10	5909	0
36229	3	36530	1
18700	10	30954	0
36229	6	36344	1
15675	7	26165	0
35448	0	37750	1
1540	1	9497	0
35448	3	35761	1
14361	7	37619	0
36796	0	37014	1
3461	10	22654	0
35799	8	37532	1
32343	0	29517	0
35799	8	37960	1
4065	6	37348	0
35359	0	37654	1
2892	7	22391	0
35359	2	37733	1
7662	9	1502	0
35927	3	34724	1
34471	6	32234	0
35036	9	35369	1
16735	7	2969	0
35036	9	35727	1
13234	2	12421	0
35036	9	35235	1
9836	2	17101	0
35036	9	35444	1
5886	10	32681	0
35036	9	35615	1
34599	8	12410	0
35036	9	35089	1
14929	0	9905	0
35036	9	34880	1
34770	1	13201	0
35036	9	35952	1
32234	1	36803	0
35036	9	35209	1
37384	9	1049	0
35036	9	35670	1
29425	7	26117	0
35036	9	36140	1
7441	4	35470	0
35036	9	34830	1
9107	5	31843	0
35036	9	35368	1
7273	6	19039	0
35036	9	36166	1
7742	9	29647	0
35036	9	37524	1
20623	6	30905	0
35036	9	37688	1
21006	5	21666	0
35036	9	34685	1
13651	3	6463	0
35036	9	34617	1
35982	4	6290	0
35036	9	36620	1
26316	5	13079	0
35036	9	37970	1
29425	3	7618	0
35036	9	35171	1
23894	7	6423	0
35036	9	36020	1
30642	7	10663	0
35036	9	36703	1
34726	7	34535	0
35036	9	36831	1
8662	9	33246	0
35036	9	35842	1
31301	7	2111	0
35036	9	36510	1
11293	9	36276	0
35036	9	37493	1
35752	3	33298	0
35036	9	35903	1
8762	1	15891	0
36304	0	35857	1
15656	3	37113	0
36180	5	36825	1
1673	7	36668	0
36180	5	36236	1
12545	10	4710	0
37171	2	35917	1
23794	9	35288	0
37802	0	36936	1
30954	0	26778	0
35477	0	37032	1
20514	3	30954	0
35477	4	36977	1
25859	1	4105	0
37309	0	35349	1
2259	10	11098	0
35245	0	37142	1
1322	6	17913	0
35055	2	36866	1
26792	1	21601	0
36881	0	36813	1
4845	7	3423	0
35344	6	37916	1
10277	6	19217	0
34593	0	37639	1
4106	5	23218	0
35224	0	37858	1
9480	2	20144	0
35827	4	36514	1
1620	1	18124	0
35827	2	35589	1
37171	8	32247	0
36893	8	37732	1
10459	4	34129	0
36893	4	36918	1
21501	1	18881	0
37392	0	35282	1
29471	8	14400	0
37392	6	34942	1
16411	8	1333	0
35566	0	37205	1
30012	4	15656	0
37902	0	37536	1
8922	7	4308	0
35201	2	36725	1
11140	6	5110	0
34744	0	35577	1
29971	4	34867	0
34744	3	36439	1
24725	9	36500	0
36791	2	36086	1
5314	6	10564	0
36791	2	35306	1
21934	4	35009	0
36728	2	36875	1
32681	7	18834	0
36728	2	36789	1
27672	3	12391	0
36559	1	36138	1
25604	9	37630	0
35789	3	34710	1
36157	8	29647	0
35789	6	36364	1
7905	10	13954	0
37770	0	37820	1
37083	3	15749	0
37770	3	37180	1
3185	5	19542	0
37799	0	34804	1
13098	10	26866	0
35763	0	36965	1
36561	6	12769	0
35763	3	35743	1
4433	10	36403	0
37160	4	36675	1
27020	6	3190	0
37407	0	36578	1
11083	4	31949	0
37407	6	37678	1
22500	1	20631	0
35460	0	36126	1
24725	5	7273	0
34871	5	37644	1
35754	2	5835	0
34776	4	35605	1
22275	2	449	0
36474	4	37624	1
30872	3	15749	0
37566	0	35691	1
29360	0	23287	0
37566	2	35456	1
15169	7	10038	0
37566	2	36062	1
23364	8	3908	0
37566	2	37795	1
23793	5	4105	0
35664	10	35312	1
1333	7	585	0
35664	5	34679	1
11154	9	36531	0
35505	0	36367	1
10059	10	15749	0
37505	0	35087	1
7372	9	35205	0
35476	0	36778	1
23394	1	29471	0
35476	2	35634	1
21177	5	22947	0
35476	2	35601	1
14570	10	26117	0
35476	2	34757	1
12651	2	1995	0
36972	3	36345	1
9352	8	20650	0
36972	6	35875	1
37391	1	5872	0
34755	3	35779	1
37810	1	20148	0
37842	1	35569	1
30445	0	2271	0
34650	0	37640	1
29440	3	9034	0
37521	0	36497	1
36337	0	34129	0
37521	3	36031	1
32919	7	18700	0
37521	6	34954	1
1063	0	22968	0
37521	6	37197	1
17691	10	22500	0
37521	6	36185	1
32827	8	28062	0
37521	6	37727	1
11876	8	19039	0
37521	6	35726	1
2	7	36074	0
35915	5	36117	1
20094	5	23945	0
35311	6	34838	1
895	10	8662	0
37803	0	34868	1
37391	7	5872	0
35258	6	37026	1
35295	10	123	0
37412	3	35507	1
37535	2	28906	0
35675	3	34980	1
5310	10	21335	0
37453	2	37444	1
14508	8	22500	0
35923	3	36217	1
2111	4	10542	0
35419	0	36399	1
4308	2	35752	0
35455	5	37359	1
8099	5	18312	0
34914	2	36050	1
34675	5	9497	0
37940	6	35957	1
15650	7	32681	0
35992	0	35919	1
19257	1	11007	0
36402	0	37376	1
29647	10	5810	0
37023	5	37847	1
26981	8	12280	0
35711	2	35521	1
6988	8	15858	0
36432	2	36157	1
14991	10	1431	0
37724	2	36466	1
1102	6	6593	0
37724	2	34843	1
24886	3	2892	0
37724	2	36462	1
23560	4	18381	0
37724	2	35791	1
12579	7	27741	0
37724	2	37291	1
3417	2	23828	0
36736	8	34879	1
2111	4	28463	0
36736	5	35597	1
8099	2	13651	0
36736	5	36589	1
34396	5	37934	0
35417	2	34790	1
9532	10	35805	0
37429	3	35119	1
29471	8	6290	0
34833	4	37896	1
23049	5	9034	0
36642	0	34686	1
15905	5	22654	0
36642	4	35205	1
31250	1	37839	0
37698	0	34626	1
17449	7	31532	0
37698	2	35191	1
13418	4	29268	0
37698	2	35939	1
19682	9	1102	0
37698	2	35023	1
23828	3	7815	0
37698	2	37146	1
2834	6	35245	0
37698	2	36495	1
37072	2	7441	0
37698	2	36023	1
15352	9	65	0
37698	2	34735	1
16735	6	15650	0
37698	2	35667	1
36668	2	7273	0
37698	2	35166	1
36415	5	23584	0
37698	2	34760	1
3833	1	25856	0
37698	2	35355	1
10680	5	37324	0
37698	2	37637	1
26792	5	14012	0
37698	2	36419	1
35644	2	7053	0
37698	2	37859	1
36028	3	4325	0
37698	2	37543	1
13956	0	10435	0
37698	2	37745	1
22500	3	37384	0
37698	2	37537	1
36531	3	12342	0
37698	2	37172	1
12420	10	21062	0
37698	2	37228	1
29041	2	27160	0
37698	2	34623	1
32138	10	25856	0
37698	2	34746	1
36567	6	21431	0
37698	2	35344	1
30455	10	36338	0
37698	2	36082	1
36598	1	30061	0
37698	2	36254	1
35214	6	3634	0
37698	2	35274	1
3423	9	26439	0
37698	2	36549	1
24957	10	13651	0
37698	2	37249	1
14187	5	23560	0
36209	3	36331	1
36210	5	34929	0
[truncated: 698 more rows]
