# Supplementary material
Source: ML conference proceedings conference paper supplement (https://proceedings.neurips.cc/paper_files/paper/2021/hash/0fd600c953cde8121262e322ef09f70e-Abstract.html)
Supplement: Supplementary file 1 [file 0fd600c953cde8121262e322ef09f70e-Supplemental.zip › Supplementary_Material_Paper_8745/data/Hamaguchi-BM_both-3000/train/train.txt]

25982	0	11558
24309	0	9016
24309	2	33679
4228	0	17541
4228	2	24995
31000	0	11878
13015	0	5968
34191	0	15535
29879	2	16425
29879	2	33757
29879	2	27458
29879	2	18439
29879	2	5300
10868	3	13710
6012	0	1374
6012	3	16918
17583	3	26628
1582	7	32171
27084	0	10817
27084	3	10509
27084	5	5353
11053	4	3208
11053	4	30377
11053	4	17254
11053	2	2284
6328	4	2531
3288	0	24850
3288	2	5799
3288	2	2495
3288	2	11256
3288	2	16677
3288	2	15728
3288	2	13708
3288	5	15272
3288	2	33229
3288	2	22703
3288	2	1994
3288	2	827
23631	0	245
23631	2	23148
10014	4	32566
10014	5	13903
11612	2	30852
780	3	25277
33700	4	22999
22002	0	20115
22002	3	9026
23414	3	6174
31678	0	27788
31678	3	30995
16010	6	28506
10041	6	21082
10814	0	19436
10814	2	11845
27879	3	2796
27879	6	30092
30678	0	883
30678	2	26456
29177	0	13842
6145	0	33386
31254	0	2515
11755	4	29426
23952	5	26442
4034	0	4099
4034	2	21518
15901	0	3574
15901	2	2164
3253	2	31495
3253	2	20874
3253	2	25783
3253	2	17347
3253	2	1922
3253	2	10848
3253	2	17312
3253	2	27106
3253	2	22271
3253	2	5581
3253	2	15533
3253	2	448
3253	2	6275
3253	2	4025
3253	2	14542
3253	2	24202
3253	2	10897
26889	0	4989
26889	3	22801
16642	0	31300
16642	3	21751
16642	6	14359
16642	6	29005
1514	7	12291
14130	0	14100
1260	6	25508
30481	0	2468
20710	2	26912
30373	0	17862
30373	3	11751
3965	2	21081
3965	2	13449
3965	2	2677
7006	2	703
10519	3	31414
30365	2	6146
30365	2	30428
27499	0	4982
27499	2	12789
27499	2	33690
27499	2	22971
27499	2	1066
8171	3	28555
8171	6	23706
29907	5	19219
3655	0	23273
25607	0	9322
25607	1	24289
10258	3	11302
13093	3	26997
2369	1	32091
22782	8	2209
22782	4	5845
21995	3	26398
21995	2	23842
21995	2	10990
7572	3	8769
24638	4	9319
21500	0	17220
27687	0	2457
7943	0	11449
7943	2	4647
9774	2	20795
3308	0	25379
3308	3	9288
3598	0	15111
3598	2	24989
3598	2	21468
1036	5	13066
1036	5	23676
1036	5	1110
1036	5	1628
1036	5	9542
17067	0	20444
26203	5	3547
26203	2	33955
5513	3	26303
23285	3	2688
29194	4	4911
29194	4	22626
29194	5	20628
14436	0	26591
14436	3	25405
32474	0	12113
32474	0	1435
7624	0	8856
30642	0	28877
9111	0	32149
9111	2	26157
9111	2	6276
9111	2	19598
9111	2	5654
2156	0	3229
2156	0	26700
15165	7	22863
15165	7	11124
28132	0	10263
28132	4	19248
28132	2	21686
28132	2	20109
28132	2	4546
28132	2	1323
20990	0	30351
20990	1	6232
24971	0	11948
12989	0	19340
12989	3	16153
12989	2	13944
12989	2	18445
24193	8	22901
926	0	22024
926	2	2155
926	2	26676
28825	0	30974
17834	0	26984
17834	2	9826
17834	2	5355
17834	2	25483
17834	2	21973
30407	4	3347
1929	5	26448
1587	0	28974
1587	4	30217
34445	0	13419
34445	2	12539
34445	2	8448
34139	0	33631
32740	0	21503
15125	0	32380
15125	3	8226
11708	2	11285
2269	6	28390
4417	3	28277
33186	0	13091
33186	2	31755
8766	0	24230
17907	2	21608
17907	2	24125
20119	0	34495
20119	3	3790
10481	3	9784
18205	2	28229
25261	0	20685
25261	6	33064
25261	9	13923
30984	3	16316
32834	0	20459
32834	1	10801
1601	0	10977
1601	3	6681
10200	2	29103
10200	2	7820
10200	2	30963
10200	2	25763
10200	2	2506
10200	2	15526
10200	5	31889
10200	5	32064
10200	2	9138
11533	0	32744
11533	2	19833
22362	0	5906
24552	3	3819
30885	0	32869
15003	0	21805
15953	0	1535
15953	2	32643
15953	2	3845
33614	6	32385
24717	5	12519
25652	2	4613
3450	2	3953
33868	2	21530
17623	0	16016
17623	5	19298
31864	6	14551
17328	0	10340
13568	6	13101
34225	0	21322
34225	2	10346
14029	0	1504
117	6	31367
25318	0	25657
25318	3	16987
27115	8	14485
27115	4	22356
2434	2	14048
2434	2	27272
21755	7	1137
10128	1	11005
27442	0	20746
7171	2	32519
26894	0	24056
26894	2	24093
33585	0	26645
33585	4	18773
16198	0	3912
15304	0	29353
15308	7	9005
34207	0	7321
15121	0	6077
15121	2	30073
17691	4	25570
17691	2	2352
1857	4	10072
6051	2	11944
34446	6	21892
34446	6	17382
34446	6	32223
18783	0	29312
18783	3	31682
27458	8	29879
28823	6	17071
30376	0	14890
16420	2	3998
34552	8	12837
10165	5	15703
22063	0	2192
22063	5	12661
11429	2	23860
11429	2	26574
15895	0	20723
13266	0	20316
13266	4	21433
34246	0	639
6314	0	21936
5148	0	3704
24220	3	28949
14067	2	17764
14067	2	27000
8860	0	33995
8860	5	11590
8860	2	20512
8860	2	25926
8860	2	17469
8860	2	14484
8860	2	28127
8860	2	12159
8860	2	1516
8860	2	7758
8860	2	9148
7998	0	15483
18123	0	1827
7890	3	24192
7890	6	22242
7890	6	30888
7890	6	28266
7890	6	18339
7890	6	379
7890	6	724
7890	6	3238
7890	6	33791
7890	6	17011
7890	6	11645
7890	6	33691
7890	6	12114
7890	6	9539
27841	0	4681
27841	0	22333
27841	2	17879
27841	2	27097
28888	3	23583
28057	0	14022
16111	0	2515
16111	2	28408
6627	4	21668
6627	4	23504
16323	0	1214
31839	0	8251
31839	2	17707
22177	4	20794
3254	0	13184
3254	2	14651
3105	0	2736
16285	2	26620
21972	1	2081
17290	0	7105
2199	6	32526
21206	0	8480
4419	0	23421
4419	1	20061
22170	8	31094
22170	8	12837
7684	0	15987
7684	2	23724
16571	6	34437
16571	6	19946
8433	2	12617
21684	0	23443
26292	3	28860
26292	6	5518
26292	6	34410
26292	6	17888
26292	6	6031
26292	6	25040
26292	6	30635
26292	6	15088
26292	6	17606
26292	6	2786
25662	0	21804
11405	0	5814
11405	2	24182
11405	2	15044
11405	2	27136
11405	2	8288
17152	3	5604
31273	7	11124
14779	6	19880
3934	2	12281
19055	6	15829
7709	1	25291
7680	0	19519
7680	4	3208
16613	0	30326
17032	0	766
17032	3	10235
2929	0	25315
10501	2	15307
24173	0	4684
24173	2	8012
31871	0	15042
31871	2	14484
31871	2	26266
12359	8	29089
12359	3	4312
20390	0	284
14733	2	9149
17861	0	12146
17861	3	32923
1199	0	24795
33816	3	3717
33856	0	8796
33856	3	11561
33856	6	15636
2775	0	25265
3725	4	18900
3725	3	19577
18687	2	4362
18687	2	14586
18687	2	4709
18687	2	32269
33736	2	29806
33736	2	28533
33736	2	18861
28456	3	7462
19352	0	16352
29708	0	4671
25906	8	24831
5431	0	16100
5431	3	13681
11173	2	17979
32019	0	2443
32019	2	6101
29582	0	3447
27441	0	20006
27441	3	16388
32795	0	33726
23082	0	5906
3731	0	22701
19361	0	10737
19361	3	4538
34345	0	6693
6153	0	2350
6153	2	19206
6153	2	29664
21766	8	8286
1922	0	3253
1922	2	28015
9284	0	10017
23815	2	28848
6823	0	34553
13027	0	27496
25413	0	31159
29168	2	28832
29168	2	19176
3421	4	20806
3421	10	34450
33030	0	4029
9513	0	20405
17698	0	27059
4166	3	9010
27344	2	12277
27344	2	26958
14321	3	4450
8358	3	17452
25844	0	250
25844	2	31443
2994	2	13623
12967	2	15408
816	0	30974
816	4	16573
816	5	6127
816	5	33436
816	5	17173
816	5	32150
816	5	20761
816	5	10570
22560	0	26141
22560	2	22369
22560	2	6656
7899	0	1054
1327	0	30380
1327	3	30847
1450	0	33424
1450	3	25138
9077	4	816
23156	0	1
23156	3	19531
30220	0	4464
31477	0	28616
26815	0	31300
26815	3	21751
26815	6	1149
7022	4	31547
467	0	8528
96	6	2601
26958	0	32491
28607	0	13225
28607	4	18956
28607	2	21388
28607	6	27031
1735	3	10265
26427	2	5871
26427	2	21002
21016	0	28078
21016	3	24977
1785	0	699
25909	3	15729
8068	0	8364
8068	2	23811
8068	2	6686
17407	2	17150
28297	7	11698
31156	0	8457
31156	6	10990
23147	0	10349
6305	3	4830
4325	0	34006
7849	8	15129
3580	0	10244
3580	3	20588
4194	0	7703
4194	2	26882
26304	4	7580
19230	0	34220
19230	3	9828
21416	3	20161
1114	0	33582
1114	5	28305
14930	0	34055
3847	2	4957
32698	4	28013
2710	8	26547
8817	8	31378
6544	8	12837
16790	0	25260
14883	0	25496
14883	3	12266
753	7	26990
2654	0	17336
2654	2	4238
21356	4	21356
29623	4	26396
26234	0	27059
11568	0	2634
32498	0	25742
1817	2	33718
1817	2	6136
1817	2	21037
31756	0	15935
31756	3	1452
32284	0	10350
32184	0	15482
32184	2	9452
9834	2	18895
14788	8	11137
14788	0	20188
14788	6	13315
2961	6	31546
2339	3	11205
30629	2	9105
30629	2	13510
30629	2	5877
30629	2	12011
26935	0	26342
26935	4	12050
17882	3	17798
1011	5	5459
6683	0	27866
15328	0	9064
15328	2	28976
13264	0	29466
7079	0	20325
7079	2	31489
13753	0	17346
13989	3	13629
28466	1	17002
220	0	28790
21878	0	32380
17285	0	11920
17285	4	33697
32176	0	32380
17791	2	9820
23894	0	33207
20345	0	27559
20345	0	12875
27964	5	33635
27964	5	8082
27964	6	5412
16918	3	3094
16918	6	27737
16918	6	6012
16918	6	24157
529	0	18570
529	3	19494
29116	2	25108
25981	7	1125
15699	8	13283
23174	0	17299
13911	8	13704
10297	3	650
17737	0	29243
17737	2	17974
17737	2	2674
17737	2	13800
23516	0	7902
23516	2	7552
33090	0	5240
33090	2	30285
33090	2	20667
24574	0	25397
34212	7	33383
21135	6	23520
20796	0	5221
20796	2	27797
25075	0	4012
25075	2	21311
15855	0	7607
15855	2	15227
28630	0	18202
28630	5	22366
854	0	17565
729	0	23261
34221	7	5164
22494	4	32049
7192	5	19995
26695	4	34438
4854	8	785
4854	3	4226
28619	3	19317
10196	0	6278
10196	2	16232
24478	0	1652
24478	2	1406
9868	0	18443
9868	1	26361
27616	0	23625
27616	2	29547
27616	2	33148
27616	2	17099
27616	2	8898
27616	2	14113
27616	2	20712
27616	2	8979
27616	2	15311
20722	0	14824
33467	8	22532
33467	1	17002
18256	0	21252
18256	3	5180
5074	2	10319
4044	0	14218
4044	3	24715
33645	0	14711
33645	3	15744
17563	1	8136
22327	0	31023
22327	2	31554
22327	2	27429
25066	0	26381
25066	5	31306
28257	0	23386
28257	2	25085
12638	0	25065
27924	0	17986
2985	7	34400
14085	0	6735
2602	0	24878
3917	10	29639
3917	5	19653
3917	6	644
7845	0	8364
7845	9	19246
16081	0	17114
16081	1	4313
12130	0	4123
12130	2	30697
26836	4	1431
26836	5	17786
27266	0	13769
27266	2	16394
26239	3	11507
7979	0	766
7979	3	18433
31735	0	2271
31735	2	32622
31735	2	1860
26569	0	6686
5685	0	9045
5685	2	12793
6108	0	21506
6108	4	14251
10242	4	27593
9075	0	18878
23575	0	25855
23575	5	23575
13645	2	3697
13645	2	10364
622	0	17466
23943	0	7839
29180	2	7016
29180	2	11843
29180	2	23455
29180	2	10986
22592	0	17883
32853	6	8416
15682	0	20058
15682	2	12756
21349	0	4933
8549	4	17057
24008	0	33860
23660	0	26158
23660	1	5855
10670	3	8005
31021	3	16523
31021	6	31285
31021	6	21278
9340	0	15134
24693	0	8792
24693	2	3507
24693	2	29373
24693	2	6195
26953	7	15992
26846	6	9215
20360	0	31859
15145	0	4510
15145	3	29266
21998	0	26083
28820	5	14065
28820	5	5880
28820	5	14095
23662	0	26825
23662	2	4634
3244	0	11219
3244	2	29084
20197	0	25021
13698	8	28398
13698	4	14578
31535	0	29966
171	6	28493
4925	0	33847
16490	0	4124
7613	0	15086
16264	0	5366
16264	1	1321
6347	3	17988
6347	6	10268
6347	6	8590
6347	6	22022
13226	5	18345
5136	0	16687
5136	3	4317
5136	5	20065
2485	0	34258
2485	3	5257
10306	0	1209
28392	8	2108
28392	8	2107
29556	0	26392
29556	3	25062
32222	0	18407
21856	0	19270
32076	0	24520
32076	2	19256
30953	0	20376
4574	2	8692
4574	2	31512
5313	0	4296
5313	1	8332
1498	2	30059
20615	6	867
23597	2	23521
33905	0	29889
33905	2	15520
5158	2	31637
5771	7	10856
1452	6	9684
1452	6	14564
1452	6	3863
1452	6	31756
1452	6	28270
1452	6	9395
2203	0	13516
2203	1	21915
2203	2	30801
31223	3	24823
31223	2	9969
31223	2	16025
31223	2	32303
3522	0	5299
4550	0	16496
34124	0	12016
34124	1	19381
10247	8	1508
10247	4	4474
28147	0	21896
7393	3	21240
7393	6	12247
7393	6	22852
6211	0	32744
31765	3	22681
31765	2	29179
262	2	26847
13751	0	3912
13751	3	14298
13751	5	31439
31990	0	18484
31990	4	26137
21886	0	7408
21886	3	19800
18072	6	25218
18130	3	26425
8899	0	33701
29748	0	8323
29748	0	6826
18185	0	13722
27210	4	9423
27210	5	3327
1506	9	21739
1506	9	609
1506	9	20404
1506	9	5151
1506	5	32410
1506	9	27064
1506	9	34334
1506	9	10820
1506	9	23345
1506	9	19122
1506	9	31105
1506	9	30186
1506	9	1693
1506	9	19318
1506	9	3940
2179	0	26187
2179	3	27146
5177	0	10977
5177	3	30938
23552	4	20982
23552	5	30093
23552	5	16244
8733	0	8480
8733	4	28503
4212	0	9178
4212	3	8115
23262	3	13290
23262	6	8316
23262	6	6871
27418	4	4474
9342	0	21322
15082	3	17684
10996	2	14504
10996	2	10597
18358	0	28333
18358	5	32639
21969	0	10286
21969	3	29350
2222	0	6757
2222	3	4505
15651	3	29048
26521	2	10463
15678	2	29210
15678	2	3479
2606	3	2475
2606	5	3198
12868	0	24134
12868	3	23177
32212	7	16878
30675	6	21771
30675	6	24915
30675	6	25404
30675	6	3223
15942	4	22626
4780	3	33754
22834	0	8796
22834	6	28721
22834	6	34152
22834	6	16290
22834	6	32187
22834	6	16152
17697	0	18015
17697	2	21476
17697	2	19798
17697	2	756
7905	3	25796
31784	0	10142
31784	3	27903
27231	8	8633
30647	0	22032
30647	0	34309
2064	0	15270
2064	2	23920
2062	0	15930
2062	4	3208
2062	5	3508
14404	5	10238
19452	3	22781
14672	0	9090
14672	2	33769
14672	2	1056
8479	0	122
8479	3	23942
16168	0	9239
31665	8	25437
31665	8	28609
1134	0	19514
24041	4	21781
31676	3	15873
31676	6	21271
9675	3	5927
5546	3	29308
20235	2	33563
1522	0	10365
18608	0	7024
18608	4	10466
14511	0	12692
14511	3	24759
25428	0	22767
20939	0	7278
20939	2	24172
20939	2	28140
3957	0	27017
3957	4	25162
3957	4	18088
3957	4	32049
3957	4	28503
3957	5	5985
23735	0	32199
23735	3	215
33039	0	25332
33039	2	9255
30760	0	4210
30760	0	6
18528	0	31958
18528	2	33088
18528	2	29619
6101	0	32019
6681	6	1601
13082	0	15382
23989	0	2622
23989	3	32553
25076	5	17992
25076	2	26027
16897	2	7042
5889	0	3218
5889	2	11817
5889	2	23979
5889	2	33597
5889	2	13522
5889	2	11732
5889	2	8440
3993	0	2739
3993	5	3868
20883	0	27078
20883	3	7100
13754	0	7895
25391	0	16858
25391	2	28878
7643	2	24849
4987	3	29152
20807	7	20893
18065	0	30409
18065	2	9421
24903	3	34435
24903	2	31740
24903	2	6149
24903	2	18928
24903	2	9263
24903	2	29776
29550	0	23975
29550	2	518
16905	0	11495
22574	0	32218
22574	2	26180
26455	3	20596
16151	0	16091
16151	4	16151
11273	2	27334
11273	2	9159
16714	8	16886
18435	0	34363
18435	2	31737
18435	2	7972
1301	3	17280
17788	0	10866
17788	4	14251
184	9	10160
184	2	18931
184	9	31625
184	9	33686
17776	8	19899
17776	4	28338
11516	0	30460
11516	2	31371
11516	2	7227
23366	5	22404
6889	3	9828
17701	0	11409
17701	2	27132
21204	0	30095
21204	0	24761
13425	2	16572
108	0	17554
108	1	2081
10301	3	7884
28882	0	22932
15707	0	7773
15707	2	952
11892	0	19937
9008	0	29357
24961	0	12961
15142	0	17440
13521	7	25613
13521	7	16313
19626	2	24657
19626	2	19838
4596	2	27516
4596	2	1004
31395	0	4501
31395	3	16562
14597	0	2213
14597	3	10315
34421	1	25291
30897	0	30799
30897	0	20672
24085	0	25087
24085	3	12162
14615	0	7024
14251	0	30235
14251	5	6108
14251	5	17788
30574	0	31098
30574	1	5306
19303	0	34503
19303	2	7208
15498	0	23947
15498	3	25695
19627	0	15503
19627	1	18537
19627	2	21292
19627	2	13007
19627	2	31019
31238	8	2773
31238	8	22933
18221	0	6843
18221	2	13520
18221	2	14832
18221	2	23716
23159	4	4122
12761	7	9489
12761	7	25300
6222	3	23559
29651	0	24293
30823	0	11298
27157	0	2213
27157	3	30226
14630	0	350
14630	3	11764
13265	0	10431
13265	3	30464
12308	0	10974
12308	3	29048
12308	5	3585
26432	0	23135
26432	5	5479
26432	5	28762
26432	5	30565
26432	5	25868
26432	2	26751
6161	0	89
30921	0	33631
30921	3	33121
30921	5	29488
19210	8	12604
15973	0	21464
15973	4	12503
516	0	32504
516	2	26450
516	2	26493
29914	0	9452
29914	4	4496
32422	0	22981
17259	0	33077
17259	3	19184
17789	0	28058
17789	1	29175
16284	6	14885
31167	0	12449
32501	0	20233
32501	3	17502
30955	0	13931
18454	0	25832
18454	2	16329
788	0	404
788	2	31710
788	2	4567
788	2	7158
788	2	19577
3239	2	33609
3239	2	29231
3239	2	20620
19489	4	84
27819	0	588
27819	2	27132
17921	0	27131
17921	2	25408
11063	0	6667
11063	2	19115
11063	2	28799
9256	2	29356
13428	6	29303
16815	0	11914
16815	2	7341
33396	0	5742
4090	0	10399
4090	2	9905
22141	8	22901
22141	4	707
21159	0	8951
23183	8	31976
11481	0	8606
11481	1	10458
11481	2	22610
14909	2	28985
23452	0	19238
10644	0	19639
10644	3	29912
19212	0	21133
19212	1	16928
19212	2	32189
6477	3	27368
6477	6	2174
32102	4	7368
23219	2	16299
1752	0	2293
31381	0	5648
31381	3	16131
20433	0	10397
11691	0	2271
11691	5	18092
11691	2	10058
11691	2	27509
32629	3	17619
29299	4	5716
25140	0	29920
25140	0	12059
15180	7	33851
15180	7	25808
15180	7	31370
6459	0	8577
20812	0	33835
8114	0	25570
8114	2	9062
8114	2	12444
8114	2	34416
8114	2	12950
34040	0	27497
34040	4	30278
14009	0	32218
15755	0	1703
19051	3	21171
28901	0	21479
15041	0	835
15041	3	13879
15903	0	28931
34279	0	20100
34279	3	7861
34279	6	33499
34279	6	22492
34279	6	17427
19564	2	18855
28726	4	663
28726	2	7049
31158	0	27061
31158	1	6495
8247	0	12556
2252	0	14128
7428	8	11464
26961	4	4496
26961	3	27183
9900	0	5291
9900	2	2846
9900	2	12980
9900	2	12829
9900	2	32426
9900	2	28895
9900	2	32562
9900	2	34355
9900	2	1145
31932	0	5648
31932	5	27598
21147	0	27440
23142	0	20315
10678	0	27075
1050	0	31759
1101	3	215
3842	0	25832
10591	0	12146
10591	3	21162
19621	6	32703
11965	6	22843
2930	0	11570
2930	2	11730
29959	0	9890
18055	0	21793
22212	3	15673
22212	6	28199
16622	0	702
16622	2	15658
10559	8	12161
10559	4	4502
10572	0	34134
10572	0	8831
5567	0	33830
5567	1	25924
5567	2	28764
5567	2	8212
5567	2	6379
5567	2	12231
5567	2	31619
14181	0	17055
14181	2	32767
4671	0	19805
4671	2	33453
4671	2	29708
21761	0	6891
10234	0	11842
1471	0	3506
1471	2	26658
1471	2	25950
21940	0	1817
26831	5	25756
19854	6	19913
17417	3	19775
22712	0	4708
22712	1	29175
10298	2	28845
34046	2	3106
34046	2	15111
21229	0	18173
8392	8	22771
8392	8	28609
25313	3	24192
25313	6	17748
29515	0	31775
29515	2	13518
24497	0	2904
26456	0	30678
5953	0	14981
16046	0	759
2195	8	15129
2195	4	33127
32085	8	12604
2659	0	10431
27298	0	33748
29704	2	25596
27668	0	30357
27668	3	13778
12625	0	8984
12625	2	31552
3152	3	30519
3152	6	2262
8450	0	26083
34416	0	8114
34416	5	8575
8711	7	22368
4580	4	5655
3225	0	1278
29136	0	28078
29136	3	24977
29365	0	27788
29365	3	30995
23780	0	18177
23780	3	6675
12729	3	24922
12729	2	30848
12729	2	28685
28849	0	34022
28849	2	19367
28849	2	30467
28849	2	28027
28849	2	27820
28849	2	25402
28849	2	14254
28849	2	20393
16831	0	8740
5826	0	28078
5826	3	24977
11931	0	29037
2290	2	24074
2290	2	14873
2290	2	33321
2290	2	24991
2290	2	16585
9095	0	24503
2573	0	15523
21066	0	20895
21066	2	4762
21066	2	14368
21066	5	15457
2783	8	2773
30562	0	33866
3146	0	25952
8390	0	33363
28263	0	24267
28263	2	3783
905	3	21685
29594	6	32598
549	0	5857
30847	6	1327
30866	8	20382
30866	4	30682
30866	5	27471
30866	5	16265
30866	5	32544
30866	5	29645
26318	0	17017
26318	2	20980
32531	0	3912
32531	3	16020
21842	3	20625
21842	6	18790
6187	0	32840
127	0	5314
127	2	6442
33087	0	7471
33087	3	2212
2013	2	26760
2484	2	7015
2484	2	1207
2484	2	31481
26512	2	25823
26512	2	2667
1412	2	31679
1412	2	11488
1412	2	566
1412	5	7531
19980	0	2213
17831	4	26290
22972	0	22006
22972	5	4078
33246	3	15046
250	0	656
250	2	25844
250	2	23348
250	2	23070
29876	0	23916
29876	5	2479
18521	0	2213
18521	3	6059
24210	0	12191
32442	0	646
28145	3	2435
28145	6	23836
22086	3	5535
22086	6	233
3110	0	32166
3110	2	30129
23642	0	9833
23642	3	23803
6616	0	21318
6616	1	21360
24695	0	34095
943	3	20401
21781	4	7654
21781	5	6924
21781	5	24514
21781	5	25407
21781	5	20532
21781	5	21407
21781	5	20956
21781	5	2385
21781	5	24041
21781	5	18372
21781	5	26297
32929	2	26062
32929	2	16647
32929	2	21833
2558	7	9662
26103	0	26841
3229	2	10332
3229	2	28094
3229	2	2156
32439	0	8984
32439	2	10384
32439	2	22032
32439	2	12677
32439	2	6877
32439	2	9120
910	0	4124
3236	0	6248
12736	0	27211
26658	0	1471
26658	4	7318
26127	0	26035
20718	0	19684
20718	2	27624
584	0	20768
13011	3	2603
32993	1	17961
18968	0	24235
18968	3	6782
956	0	1681
31290	8	2209
3393	5	14894
26443	1	26665
17437	0	32707
17437	2	16704
17437	2	12764
17437	9	25973
17437	9	28471
17437	9	16611
17437	9	13108
17437	9	16807
17437	9	26764
17437	9	29726
3694	0	24259
11680	1	31387
11680	2	29905
11680	2	16369
11680	2	26711
11680	2	17826
11680	2	3631
11680	2	8861
23919	0	1808
23919	0	14196
23919	2	19787
16816	0	9073
16816	3	17394
18213	0	16505
18213	3	25374
20002	2	7670
24278	0	574
24314	2	1839
2178	0	24984
2178	3	20047
19805	2	4671
19805	2	17362
17430	0	11878
17430	1	26665
32121	0	8948
6819	0	5965
17273	0	2619
17273	2	8414
6636	0	4508
6636	5	23397
21313	2	18774
19011	2	10082
19011	2	14731
19011	2	24337
19011	2	3722
19011	2	4935
19011	2	27190
33274	3	625
19557	0	5166
4891	3	14752
616	7	2316
5119	8	785
695	0	1214
695	6	18560
29553	2	6756
26048	0	28229
18033	6	23503
21173	0	4195
21173	4	13314
21173	5	28133
1453	0	7555
34013	0	33041
23834	2	27082
23834	2	27855
23834	2	18500
23834	2	34454
7959	0	21826
29909	0	2313
29909	4	33749
11933	4	29523
1906	3	7948
14069	0	19483
14069	0	21106
5648	0	5680
5648	2	17607
5648	2	30393
5648	2	16560
5648	2	9545
5648	2	20013
5648	2	30834
5648	2	26257
5648	2	9385
5648	2	2594
5648	2	31381
5648	2	10209
5648	2	31932
5648	2	18251
5648	2	33931
5648	2	9606
5648	2	24147
5648	2	31830
5648	2	27029
30433	5	1644
4934	2	21027
7288	0	21262
7288	2	26321
25603	0	23677
24642	0	24621
30227	0	25755
30227	2	32463
7390	0	20726
7390	2	12771
7390	2	12371
7390	2	11071
11224	0	11383
11224	2	18113
17679	0	30770
17679	3	34365
30669	0	28967
4326	0	10875
3772	0	34358
11196	3	10075
25620	0	18520
26689	2	31579
29007	0	30832
31002	0	31151
31002	2	17281
5752	0	10263
5752	4	29433
27888	0	1214
27888	6	22178
27888	6	8638
27888	6	29064
27888	6	22500
27888	6	5997
18376	2	28122
10234	0	4815
7445	0	25397
7445	3	5143
797	0	8836
20132	0	22532
20132	2	746
20132	2	21575
59	0	11415
59	4	16554
22794	2	34325
22794	2	14004
4828	0	10067
4828	3	4079
24436	0	24939
26989	0	11675
26989	2	12951
31123	0	23185
18492	0	13314
18492	0	31135
18492	1	3984
18492	2	22358
25832	0	8087
25832	2	18454
25832	2	3842
25832	2	5445
5630	4	3007
1618	0	20322
1618	2	11920
1618	2	7645
1618	2	12518
3873	0	31836
15737	5	3926
28167	0	28741
28167	2	29768
28167	2	27849
28167	2	820
17512	6	21393
8220	0	27059
8220	2	28774
2737	0	11913
2737	4	24582
2737	5	1560
2737	5	16317
2737	5	25014
26990	7	753
17874	6	29612
17874	6	18850
17874	6	16402
24189	0	21464
5444	8	8518
5444	1	7383
24993	2	29750
24993	2	16502
8573	0	9854
8573	4	3377
9710	1	29378
12832	2	19666
12832	2	26917
12832	2	21713
12832	2	5092
20760	0	26700
20760	2	8949
21108	2	18287
21108	2	28968
21108	9	15439
24115	0	6264
24115	4	34032
32464	0	18748
32464	3	19494
29095	0	16839
29095	3	32822
7000	0	25884
7000	2	20256
10848	0	3253
10848	2	21000
10848	2	392
10937	0	4375
15917	4	14456
18849	3	32805
28090	0	8984
28090	5	14784
28090	5	28046
27373	2	24748
27373	2	22479
27373	2	28876
16704	0	17437
10328	4	30737
21486	0	27106
21486	2	17046
12701	2	16852
32314	0	25378
32314	3	1783
18423	0	7419
18423	4	1232
34425	0	18173
34425	2	26046
34425	2	18761
16232	0	31644
11681	7	15331
28353	3	18099
9511	5	118
28677	3	23966
28677	6	14890
28677	6	29070
28677	6	14460
28677	6	20522
28677	6	1122
28677	6	13308
28677	6	30376
28677	6	30115
28677	6	27754
12523	0	16243
12523	2	22314
12523	2	18290
15538	0	12905
15538	2	26558
15538	2	13033
15538	2	12749
15538	2	30152
15538	2	6360
33454	0	4124
29092	0	28386
29092	2	1290
29092	2	20350
29092	2	28753
27110	2	19042
27110	2	4130
27110	2	18040
15860	7	24502
842	3	20587
14718	0	14358
13512	8	24786
3070	0	11526
3070	4	16554
5261	0	19434
5261	4	6935
28787	0	20177
28787	2	20770
2343	0	25671
2343	2	932
22755	0	20341
4813	0	27496
28322	0	9723
11823	0	18807
11823	6	25384
31722	0	17949
7563	0	25756
7563	9	27543
7563	9	23772
7563	9	16625
7563	9	32550
30394	0	27917
13432	4	31547
19686	0	32380
19686	3	8226
6858	0	17731
6858	2	14849
7373	4	29722
27634	1	15748
18386	0	16814
18386	2	8953
3441	0	20729
3441	3	13852
21740	0	26007
15921	8	15129
21408	2	23775
21408	2	15273
21408	2	32885
16364	0	20846
16364	5	31913
16364	5	31202
16364	2	28032
16364	2	3596
16364	2	23637
16364	5	10325
16364	2	24827
10020	4	33890
10020	4	6072
18630	0	8457
18630	3	19387
13181	8	9278
13181	1	33331
18144	3	2399
21363	8	13314
21363	4	21677
22841	0	21464
22841	4	18571
22841	2	23773
22841	2	9811
3819	3	13483
3819	6	24552
32438	2	28796
12272	0	33990
275	0	33137
275	2	13541
275	2	30394
34503	0	6264
34503	2	3104
34503	2	24346
34503	2	19303
17182	0	8984
20586	0	30357
33060	0	34335
33060	2	25296
19272	1	21699
19272	2	6217
19272	2	5107
33649	0	29020
33649	2	7725
33649	2	14599
10073	2	20249
21353	0	7219
21353	3	32941
3410	2	29427
3410	2	1116
33181	6	9220
33181	6	24652
33181	6	33976
22101	0	33131
20526	0	8528
12408	3	23394
20581	0	30357
20581	3	24461
9573	5	7479
9573	6	11688
9069	0	6527
34053	0	8040
33291	2	17266
33291	2	33805
33291	2	25108
33291	2	11924
29362	8	27219
18586	0	33961
18586	9	29786
16805	0	28365
24292	0	8229
20821	4	33890
21831	0	17862
21831	3	10467
15533	0	3253
15533	2	10104
15533	2	14850
1537	2	32868
34156	0	3242
34156	2	1784
25971	0	17589
4629	0	11744
5590	6	841
23454	0	32153
20024	0	15466
12806	2	10689
33068	0	30380
33068	3	7660
28547	3	18671
29731	0	33352
11782	2	256
11782	2	16508
19578	3	11022
3132	0	4440
3132	4	11365
3132	4	12107
31960	0	16914
6497	0	3777
21947	0	5151
31095	3	19747
15975	0	21835
29739	0	19154
8643	7	31630
12196	0	24565
12196	2	24442
12196	2	25435
1885	0	12163
31402	0	30738
9274	3	17167
9274	6	22612
44	0	10152
44	4	9390
14553	0	29824
29587	0	19170
29587	2	31693
18512	2	29507
4059	0	13183
4059	2	24240
13471	6	32981
13471	6	19752
14892	0	17849
14892	3	22982
14892	6	9154
6303	8	1508
6303	4	13113
2323	8	15129
2323	4	34399
10580	2	22455
10580	2	28747
10580	2	20524
27265	0	10030
27265	3	30954
5919	5	11525
5919	5	2161
1881	3	18044
6027	0	19455
7194	0	21688
11024	0	15276
7870	2	27195
22845	3	24307
5107	1	17643
8410	0	30832
8410	4	11442
19275	0	17928
19275	2	10369
19275	2	10095
3262	0	21651
3262	9	26632
27276	0	33810
27276	9	3479
27276	9	3397
27276	9	31817
27276	9	17331
27276	9	27762
27276	9	5735
27276	9	11162
27276	9	6500
27276	9	9338
31846	0	31320
19699	0	30357
19699	3	18192
836	0	28684
836	3	18740
27642	4	31159
5932	3	18820
8252	0	3646
14677	0	29458
14677	5	2377
3697	8	13645
3697	8	7244
25172	0	32380
30092	0	14118
30092	3	27879
11406	0	8473
11406	4	13842
11406	4	33833
11406	4	26699
11406	4	6895
11406	2	17246
11406	2	1608
11406	2	10338
11406	2	29644
22198	0	29942
17413	0	18570
17413	3	19494
25619	2	28792
25619	2	20737
554	8	19931
11711	8	7792
11711	1	17002
20412	6	6646
16566	0	27693
16566	1	19194
32859	0	21479
9598	0	264
9598	0	5298
13022	0	23767
13022	4	7983
18310	0	23247
18310	2	30590
16864	2	32209
22129	3	4758
32844	0	14472
14689	0	21238
14689	1	23905
11365	0	5067
11365	5	3132
28338	8	11137
28338	5	17776
29283	0	17346
17590	0	27622
17590	4	23936
23923	0	11449
23923	1	2206
31490	0	19604
25933	2	12971
32970	2	23669
32970	2	23044
32970	2	6183
6355	4	8712
12505	0	26401
24446	0	28724
23046	0	32921
23046	6	31408
16446	5	24450
16446	5	31988
1334	2	6171
1334	2	16443
1334	5	180
25734	6	7271
15228	0	20424
15228	5	20717
15228	5	21593
24774	0	9550
24774	0	871
3084	0	22731
3084	2	7955
14518	0	30518
14518	2	9314
32424	2	15255
32424	2	18511
26575	0	33707
26575	4	14250
16204	4	1596
19661	0	19905
19661	3	5535
19661	6	12198
26978	0	34430
26978	2	11066
26978	2	12590
8880	0	20662
28423	0	18293
28423	4	26770
10869	0	14524
14521	0	13732
14521	2	15396
14521	2	34300
30430	2	1849
22076	0	30843
22076	2	12278
24989	7	9939
14599	8	33649
11925	0	28847
11925	4	913
11925	4	30420
5098	0	167
5098	2	18589
5098	2	34242
15079	0	4437
23403	8	13704
23403	8	12097
8166	0	26402
8166	2	16853
8166	2	24982
16423	3	26838
15914	3	19109
24578	3	4341
21578	0	24826
21578	2	15596
21578	2	4298
26782	0	29897
13880	0	6618
13880	3	19494
33101	0	6947
33101	5	15845
3213	6	7015
3213	6	1207
3213	6	31481
29994	2	9085
29994	2	19659
29685	2	30257
34172	0	12214
19999	3	7884
26242	0	11853
26242	2	19093
24996	0	18129
32481	0	19415
32481	9	15194
25489	6	30166
6238	0	31318
6238	6	6526
20438	8	28474
20438	4	33890
2550	3	19130
34359	0	10064
23395	0	28447
23395	1	30567
4883	0	21858
4883	2	9914
16762	0	32573
26950	0	9444
26950	2	18311
30071	0	31881
30071	3	1980
16999	0	7384
16999	2	30323
6018	0	15270
[truncated: 69,097 more rows]
