# Supplementary material
Source: ML conference proceedings conference paper supplement (https://proceedings.neurips.cc/paper_files/paper/2021/hash/0fd600c953cde8121262e322ef09f70e-Abstract.html)
Supplement: Supplementary file 1 [file 0fd600c953cde8121262e322ef09f70e-Supplemental.zip › Supplementary_Material_Paper_8745/data/Hamaguchi-BM_both-3000/train/valid.txt]

1036	5	21545
13568	3	4041
1857	4	32892
23815	2	15401
10297	0	30380
31735	2	15253
32853	3	15716
20615	3	32298
23552	3	22382
23552	5	15718
16714	4	18248
184	2	20175
31344	0	8928
3239	2	8941
34416	4	7823
4459	3	22320
19011	2	17007
11933	0	21436
27696	0	12493
2737	5	12290
2606	0	16031
8173	1	7383
3213	6	2484
16762	1	2118
29041	0	13461
20746	2	22708
9509	0	25640
31844	0	2641
20570	2	16518
31126	3	19079
26363	6	13881
11400	0	14688
11542	3	31333
27518	0	16875
14080	0	18012
25279	2	23419
27073	3	22058
1659	0	19628
16359	2	34099
29994	0	13948
15731	2	31437
28721	0	19257
23773	2	26286
32980	3	22382
23252	2	6221
21243	4	2418
23843	8	1745
22637	0	29486
22637	2	556
7903	0	16068
9352	3	23375
25757	4	15766
19722	0	31300
26349	3	3727
26844	2	23220
16033	0	21901
6968	3	4182
18088	5	20632
10019	2	34194
4954	3	17227
22957	4	15045
19344	0	32328
21553	0	24563
33578	2	26822
9883	0	21408
21719	3	19146
13034	0	30946
5181	0	25640
5181	3	20655
19098	0	25636
17274	0	16658
10066	4	12205
7052	3	498
13387	3	1156
30113	3	23643
24611	4	23311
34258	2	5397
6510	2	30485
2695	2	12348
3231	4	27939
22431	0	34166
25725	5	9772
15935	2	17887
10816	0	9223
13531	4	8143
30496	8	22901
18572	0	25863
15521	4	7580
18209	0	5030
8544	5	3883
4645	5	4536
4645	2	33694
17175	2	30165
5968	0	12998
2694	3	30772
11703	2	32440
14035	3	24024
18373	0	25570
1324	3	27627
23128	3	18626
13122	0	30191
4290	0	26497
24110	8	16407
21124	3	24805
6338	0	23029
27681	0	13074
7609	5	1029
425	6	11802
16586	0	15144
19495	0	15935
19185	6	33134
22207	3	26371
11528	3	16000
25181	0	5508
25181	6	18033
29509	9	20638
23033	3	507
22158	2	14800
18331	1	5843
21346	2	33321
31300	2	2759
31300	2	28448
31902	0	13903
18437	0	31628
16906	2	690
1399	3	9196
32837	6	16870
25274	2	29422
20921	0	25008
187	0	18272
27362	0	8446
15569	2	12802
23448	4	19771
18868	5	20688
20826	0	28697
31730	1	31387
32114	6	20253
7757	2	23252
25189	0	1214
43	2	25115
24966	2	20600
21904	0	6496
26737	2	13969
21022	6	1169
21022	6	4227
3984	9	18237
1592	0	10631
10224	9	12360
12837	2	18013
12837	2	785
12837	2	13703
12255	3	24277
7355	2	28830
29888	6	23758
25682	9	25326
6935	5	17163
27382	0	22799
24811	0	16594
24037	6	26598
29482	3	22894
20322	2	14329
30617	5	18332
29895	2	31526
33860	2	4984
29096	5	12873
4331	4	8656
32504	2	21226
30434	0	12871
17260	0	9343
24068	2	8102
15168	8	12155
934	6	16621
26511	6	30597
10885	1	9206
6691	3	33407
5209	5	18914
10674	4	30707
1474	0	20039
26548	0	3984
7359	4	15436
26665	9	21485
19375	2	26326
26868	2	26526
21793	2	30935
23997	6	8086
30725	0	13507
12005	0	32840
8617	2	11511
31450	5	31528
13611	6	26627
14353	2	25352
29982	0	9498
30505	3	7436
14993	9	21785
4207	3	16974
7868	5	27250
10545	9	19819
27183	6	25094
14189	6	3983
25326	1	25682
7353	0	8675
33687	0	12506
13511	3	29698
521	6	9717
30390	4	16456
30035	0	21500
1183	0	20322
10707	6	6525
16842	2	28906
1673	3	17855
6824	6	24680
15361	2	2647
3887	3	4076
25797	5	33601
5282	2	5951
5282	2	1788
9375	5	7517
437	6	25491
9207	6	2500
15335	3	18342
5969	0	16421
30337	0	18799
25475	2	19074
7954	4	5768
31851	0	7384
24850	5	270
24850	5	16999
863	0	20322
34370	6	25789
3204	2	4441
14202	4	22632
22595	4	30682
9028	2	27575
31809	6	14013
31620	0	19063
33612	3	24445
8934	3	17029
840	2	26783
13692	3	17366
21211	6	17177
25947	2	20846
24000	2	9344
9233	2	14928
4731	6	8231
20689	3	23552
10714	2	637
10534	0	1985
3437	2	11353
3593	3	564
27397	2	16273
19079	3	12643
18141	3	26997
6329	0	27415
27380	3	8765
2118	9	16762
27406	3	27183
1774	0	25178
21521	2	2682
3640	3	5950
24255	4	20982
30938	5	33979
27107	8	27893
27107	8	5889
1163	8	12155
5561	3	22982
31694	3	8872
1415	6	8228
1415	6	2281
2242	0	2029
20662	2	21479
4380	5	10816
13423	0	5906
20869	10	25373
900	0	4822
30945	6	2975
30945	6	7675
394	2	26794
26404	2	9832
17982	5	5427
10259	2	15667
32142	2	28941
30671	2	10394
323	0	33886
2133	5	7780
21898	5	30432
9053	2	11506
10418	3	32766
26921	0	4375
31265	6	18049
34286	2	1975
25707	8	28609
4249	6	9702
22532	2	2218
26299	5	16825
31354	0	8255
4358	2	19974
31364	0	5802
23992	4	3208
7172	3	12185
7172	2	4284
7800	2	19750
19411	2	16326
15134	0	23450
28813	0	17472
22247	3	31410
18578	0	4747
3003	6	30427
19156	0	12922
5045	0	1927
21151	6	31055
17321	5	23482
11048	3	28301
33073	2	30399
31266	2	22127
22814	0	16326
8822	2	3701
21162	3	31585
32218	2	19186
22445	2	2396
33363	0	28241
28503	5	700
28503	5	14360
26386	0	24489
1491	6	24061
14195	6	34249
28847	2	28068
133	2	15689
133	2	19483
14116	4	20149
12276	6	27705
33391	2	11657
7534	6	4016
15318	4	3208
6166	2	23220
14270	0	3185
16687	2	6942
25067	2	28111
23643	6	2481
20529	2	3705
7247	0	30643
28180	0	32744
3318	2	24520
7792	2	28466
4830	3	19392
4655	2	7846
24419	3	23248
10047	2	6062
20600	2	19708
31810	2	552
7737	2	1456
32901	0	16533
15587	2	20237
31890	3	1061
21834	2	22618
2499	2	16926
7625	0	21471
25417	2	20793
3937	2	26699
33670	3	23012
28519	0	9040
26231	0	33378
14309	2	10264
15631	2	28660
26273	4	7780
28089	0	25754
13287	2	18139
8364	2	18986
20100	2	17507
24112	6	23800
15249	3	26589
8870	0	30748
8870	2	33706
16930	3	22480
14177	6	25936
4855	4	18127
16417	3	29469
16417	6	9483
31697	2	18105
17845	2	285
3276	5	22152
16774	0	28608
384	0	19232
7939	6	15378
15482	2	34330
27813	5	27952
33134	6	3885
33134	6	12858
95	6	28861
2403	0	7726
12214	0	31836
19048	0	4657
27577	0	10764
27577	2	5490
29808	3	29773
23868	4	31277
30852	1	15658
28828	2	4727
27269	2	14577
14565	0	30218
3342	2	8823
29602	2	27955
17197	9	28298
15270	2	18605
31593	6	3233
17306	0	9716
2081	9	1407
18658	5	25325
26997	6	13672
24693	6	14320
28371	6	4026
17369	2	13063
33041	0	21299
672	0	32179
27367	3	30945
5022	0	8790
5933	6	33893
13233	6	32616
2312	2	29398
32358	4	17321
881	6	6977
20177	2	7106
32582	0	19937
7986	5	7986
26703	0	29287
17854	6	26872
1359	6	9646
10502	3	34484
34132	6	20704
24538	2	230
10209	5	18232
2729	0	22367
2729	2	32247
23799	2	34116
30789	3	14176
13985	2	8625
3208	9	11428
3208	5	22705
3208	9	14561
12521	2	11442
679	6	34190
679	6	26303
7451	0	4532
5482	4	18792
28910	8	12155
8729	3	9660
5857	2	21362
5857	2	12976
32515	4	7580
32186	0	8372
32186	2	34201
10140	6	2003
13998	6	23046
13998	6	8217
32475	4	11662
28983	5	9642
8040	2	16269
8040	2	7350
16057	3	23707
30018	3	28489
17195	2	4721
18571	2	34474
16827	1	31387
9178	2	25419
11853	2	23975
25756	2	25291
1813	5	21964
14302	3	3610
24340	0	31469
12824	6	26834
31715	6	7161
17937	1	19194
26469	9	12817
1517	3	22982
7385	0	30229
28608	6	18803
5214	6	23350
34179	2	4292
34393	5	2250
21480	4	15071
20357	2	3058
6645	2	33780
4496	5	5270
29378	9	10096
5814	3	9722
15996	7	9808
30212	2	30703
21539	10	31376
19041	6	15079
702	2	17017
23806	2	22445
16055	1	24236
10334	3	20046
22901	2	22632
8304	2	33578
34537	2	31450
26841	2	23430
8620	6	12377
1508	2	6678
1508	2	4134
1508	2	6385
33583	6	847
11144	4	28830
7091	4	604
10972	0	8307
12407	4	18810
14569	4	33201
14569	5	20628
20876	0	8389
27210	0	5802
1439	2	4765
4736	3	21019
25932	0	6527
5819	3	7462
10977	2	22007
14775	0	3253
507	6	23033
23966	0	17849
33544	2	11299
16031	2	33172
16031	2	9027
13837	0	26515
16199	9	34201
15096	6	21852
20181	6	22094
28096	3	11073
11409	5	21203
10692	4	24295
938	4	15516
19302	6	7963
13314	2	3288
13314	5	7384
17244	5	1367
17244	5	14915
29800	9	13242
6807	0	30643
4536	1	4645
34339	3	7861
3566	6	24510
33890	5	24046
8606	2	29280
8637	4	29243
18583	6	7238
6254	2	20969
26305	0	8379
20280	6	29444
12484	0	27551
9693	3	9217
23610	9	4533
23610	2	2499
17894	2	4251
5984	3	26422
3713	2	11865
28992	3	30826
13630	2	4730
31777	0	4803
32928	2	10176
32928	2	4446
9508	2	10294
19544	4	18797
22176	3	22094
8457	2	1519
4012	2	18922
13218	3	7761
11555	6	33282
9517	0	21068
13710	6	28972
26381	3	26205
31800	5	31818
8389	2	20876
13889	0	1214
19053	5	31456
1982	2	15318
25224	3	934
32218	2	21972
1967	2	3501
29393	0	34051
2375	0	32744
1896	0	31392
34027	0	1371
34027	2	22627
14592	0	2725
24049	3	32722
14860	0	19721
14860	4	11404
13664	0	702
30996	2	8617
20675	3	4442
17713	0	22821
8539	0	26887
9234	2	5768
19736	2	34376
18195	10	23676
7265	2	16897
3874	0	16031
17163	4	6935
33996	6	22956
7580	5	7085
6	2	21425
15622	3	10189
4656	3	3620
1061	6	14523
33329	0	13314
15617	2	150
8043	0	16031
32225	2	31635
33288	9	16558
23548	6	1531
32380	2	19060
6002	0	14760
811	3	33123
34021	0	13819
17548	3	24373
15439	4	26813
25291	9	24825
25291	9	14829
9400	2	2315
19905	2	30867
12486	2	16750
20434	2	4833
3904	0	26156
27785	2	19700
19111	2	9573
19111	6	33371
28732	0	33382
28732	1	12221
28758	2	26159
25800	6	31292
312	6	28430
25074	2	20457
30831	0	15147
30463	3	33205
4393	4	34369
2396	2	28641
17798	5	18953
21808	5	296
23386	1	31387
29679	1	31287
18203	2	4057
32298	3	26806
22545	0	32440
20046	6	10334
28026	0	70
18051	10	15670
1236	0	1214
22444	3	9066
8330	0	22047
15025	8	14639
18775	4	7580
1630	0	25854
19273	2	8517
14357	6	30440
20766	2	25523
4972	0	2302
7127	5	28779
11093	5	18934
14081	0	28291
7326	2	13302
6737	0	23475
25294	3	21240
5719	2	20444
11717	2	3044
13381	4	7580
33509	2	19847
23167	3	2191
17211	2	286
2025	0	26356
27631	0	16030
13502	3	27183
11507	6	17130
25733	0	865
14561	0	17487
3545	0	23806
2622	0	10929
11098	5	21315
31502	0	29920
30229	4	10994
8014	2	5675
26382	4	14123
24592	0	10260
19395	4	19315
11731	3	12225
9217	6	13223
16531	1	31387
7630	0	1214
31848	4	32985
23612	6	28321
6184	0	12845
17846	5	32207
9688	2	2503
26750	5	20749
11040	2	28987
11040	6	24286
14183	2	27775
20400	0	23754
1706	0	31831
18773	0	28241
20289	4	12034
17371	6	5481
12113	0	14974
28860	6	6825
34316	0	19342
23736	0	18343
14624	4	32869
14624	4	28830
12784	6	18501
18187	2	4525
5860	1	8332
22328	2	1985
10394	2	18172
11844	0	11416
22780	5	7989
14019	2	1445
8615	3	8047
20474	2	927
25753	0	231
34094	2	31803
32597	0	20155
21153	4	260
27932	4	13117
19524	6	14180
14645	6	9965
14645	6	26522
2367	0	29902
33573	2	19860
6715	6	4615
4747	2	18578
16292	0	19948
23233	2	10347
538	0	28790
12722	0	6833
33445	0	32174
4896	0	4143
24312	2	27183
12998	2	4857
4423	9	18143
22004	3	22480
31282	9	28101
31282	5	26084
29900	2	21485
2773	1	165
23905	9	14343
1979	2	16478
18192	3	5077
1610	2	6555
25276	4	28651
9478	6	4951
3006	6	27653
15515	2	20169
29231	2	20894
7268	2	21165
7986	0	21464
29280	0	8606
10028	2	31387
27569	4	12050
27549	3	8335
5430	0	1214
24546	0	23137
30464	8	12353
30163	2	15841
30799	2	1659
501	0	23095
11993	0	21436
19592	2	1539
26589	6	28684
23027	0	30438
30670	6	23860
23060	0	27364
13651	2	25804
19721	0	5857
19721	2	14860
5978	0	1982
656	2	8481
7356	0	26761
2867	0	13258
623	0	31300
17292	2	9087
17292	2	23276
9010	3	16378
26035	2	19224
31432	2	14469
32482	0	2133
1531	3	23548
5845	5	18914
12225	6	7455
12225	6	4723
9440	3	28220
30748	2	851
12925	6	22329
9582	0	16594
6361	3	10190
29952	0	7651
1782	4	28840
7936	6	29670
11185	0	6349
30601	1	26665
29446	2	15848
6992	0	406
8758	3	272
13047	3	34279
17933	0	17036
30788	6	9999
33382	2	18725
31927	0	5566
1411	3	23828
18460	0	26662
18460	4	31882
32533	0	501
26627	3	13611
31629	3	27146
18807	2	17849
18807	2	21151
18807	2	32182
12950	5	14753
6202	4	9398
14948	3	8802
5630	2	7415
13142	3	26589
31884	3	521
12403	0	19721
12403	4	2288
25511	9	7498
7706	3	19177
15918	6	28644
24445	6	8600
13516	2	20160
10037	0	15968
33973	0	15635
12794	6	33361
26330	3	23997
24765	3	9480
22236	0	31028
13605	6	1530
13605	6	25423
27952	0	13842
12221	9	1231
12221	9	24665
5151	5	12645
28747	2	29037
10628	3	18627
16157	2	25118
33108	0	25947
17661	0	32440
1095	6	11835
25935	4	3276
4288	3	7936
8757	2	18155
10568	3	23254
26465	2	22581
18901	3	5655
30391	3	18626
14176	6	30789
20478	3	10131
8644	0	8822
6415	6	21757
6804	4	30217
4572	2	3437
4111	0	33522
11913	2	33310
25242	6	14342
21464	2	20378
21464	2	20091
24035	2	17647
2840	2	31686
22976	0	20322
27350	2	26662
8958	2	29407
33788	3	2788
23858	2	34499
25949	3	30772
2418	5	3801
28974	0	20322
25211	6	2383
23334	0	10152
33455	0	10929
34135	4	19064
34135	2	23384
8657	1	17002
34515	0	4013
23400	0	25274
14180	3	19524
12922	2	33520
5982	0	4109
6673	3	18728
31192	9	19065
21901	2	16033
15535	0	30357
359	0	6699
16971	2	1189
26885	4	15516
2800	3	4897
33018	2	17087
24131	1	6232
20633	0	533
30452	6	5180
23577	0	33860
27504	4	1036
20316	4	21433
5724	8	24672
1173	2	17117
30943	2	22704
14349	0	29458
17036	0	22698
28861	3	95
476	2	19705
1551	0	8567
34554	2	264
8418	3	13594
16431	3	17645
9833	0	20370
5843	9	4810
5843	9	18331
5843	9	20004
33707	2	4029
4746	2	10570
25178	2	33751
25178	2	13013
33751	0	25178
20595	3	9454
21351	2	11900
11199	0	15270
23375	6	33084
2128	0	22289
21985	0	8449
19685	4	1813
13063	0	17369
31909	2	2147
6189	2	26295
26369	3	13666
22295	2	9904
14807	2	28741
11923	6	12622
20167	0	20100
18650	3	4711
29520	4	15766
29139	0	5291
4873	0	7053
8754	3	1884
6687	0	28242
8335	0	1214
8335	6	171
8335	6	14658
28154	5	5797
31865	0	27551
10653	2	30792
16266	0	15270
22815	6	13114
27061	0	4952
16198	3	24061
2875	2	8444
23625	0	21613
23625	2	7771
26881	2	7726
30270	2	9518
7384	2	11556
7384	2	30923
217	3	23966
3246	3	11327
6612	6	30330
22478	0	33573
23031	6	2546
13462	0	25552
89	2	19660
31783	3	3158
16523	6	28312
16523	6	18268
279	2	34134
27794	0	33606
20362	4	7812
20362	1	29175
16349	2	22981
4170	6	4084
16552	5	2401
22892	2	23529
28684	2	31099
17922	2	15846
22085	2	27497
29328	5	30262
29328	2	16505
25118	0	16157
2140	6	15504
12750	0	22821
12750	2	16783
27017	2	18332
32618	5	32900
17893	9	506
7262	4	23335
11311	3	7968
29944	0	32148
11303	2	7505
7055	5	23761
139	2	2341
8379	2	26305
8585	8	12097
10078	0	17292
18272	0	1756
470	2	8775
18337	6	8405
12088	8	16886
23686	2	32541
24701	3	30789
7146	0	1564
14919	2	29579
13323	0	26877
19690	0	20039
25150	4	825
17687	0	15986
13602	3	15642
18173	2	22326
18393	4	30103
18393	4	28639
15641	2	28063
6225	6	1415
2391	4	29696
7108	4	25757
34220	2	6889
3191	2	3861
24292	0	29900
17079	2	27212
13528	0	32891
6847	2	5558
766	2	33078
25336	0	394
17887	2	5644
13868	1	15658
30029	5	1157
23030	3	24002
6148	0	6496
28014	2	23504
33767	4	15481
33767	4	31882
11870	9	24412
15891	3	2308
15891	2	30103
28597	6	4344
6504	2	12284
13129	6	12787
8740	2	19555
15739	0	20322
15289	0	32498
4124	2	31258
33013	3	311
14424	3	21906
1626	4	9245
27651	6	8404
15723	3	3452
32428	0	33297
5240	2	3242
24645	0	16030
25063	2	9205
13212	0	24603
4089	0	18015
1214	2	8335
1214	2	22373
1214	2	318
34516	0	24925
23094	2	21068
10865	0	7343
16478	0	1979
3617	4	3617
4013	2	30029
4013	2	5237
13855	5	10211
7104	4	16504
29632	1	7383
28450	2	22481
27491	0	30832
6722	2	5908
4317	6	6942
30103	5	10226
20039	2	20872
21949	0	34515
26583	2	28725
29507	0	28658
17375	4	13314
2212	6	23763
14639	2	15025
11187	4	15516
11705	2	33285
23911	5	20592
27943	6	15244
18792	4	32044
30554	5	22429
16456	5	10348
30871	3	34254
5638	0	31300
12498	0	12459
3895	2	14041
1609	5	28652
8276	3	16691
31387	9	16531
31387	9	15862
13748	2	8413
13748	5	1893
23697	0	1871
3864	3	22442
3286	0	34179
3286	2	21757
29903	0	18149
483	0	8958
17862	2	10639
33412	2	993
11227	4	3511
30035	0	22687
23528	5	19751
18093	2	19121
7256	2	19510
5818	0	22436
15742	8	29540
1321	9	3567
25717	0	23475
9754	4	3208
22817	2	8187
27423	3	3153
4519	4	34399
32578	2	17091
28453	3	15330
25761	3	15516
33258	3	10826
148	0	21711
11449	2	19426
3578	9	8079
29289	0	19415
25643	2	27809
998	0	32142
23143	0	25346
26635	0	13985
4206	6	12114
32063	2	1539
1762	0	17767
5798	3	22745
20150	5	10141
30969	4	16492
23606	3	11172
2281	3	1415
17471	3	8782
4028	2	29509
21979	0	9278
32869	2	9182
14300	0	6496
16091	0	946
27948	2	2735
3163	0	15891
15231	4	22626
24016	0	114
24016	3	17553
5632	2	27269
30832	2	16037
28633	0	29631
22301	6	7840
17882	4	3960
15540	2	25397
17000	6	13830
24714	3	27037
1036	8	27432
27616	2	29403
20722	1	3208
24693	6	14320
1857	4	32892
29092	2	15624
29994	0	13948
7898	3	27705
164	6	7280
3533	2	33892
9583	0	2641
9692	0	16214
15149	6	32837
7649	2	128
19495	5	13665
4437	2	30864
3158	6	5820
26737	2	33280
30993	0	32692
16269	0	8040
30401	0	5857
13908	2	14426
11766	4	13980
23311	5	24611
5286	3	33502
23148	2	1586
6327	0	30
29686	0	11770
20892	2	2703
30154	0	19381
30233	3	5776
15039	2	27841
13681	2	31203
5067	2	12107
30276	3	23825
2	2	27995
28396	2	20849
23176	0	33069
30970	6	21639
21923	0	15613
4283	2	14082
9289	6	8161
3233	3	31593
23958	3	12913
1023	3	8927
34126	2	30140
23307	2	30532
15257	0	34007
