# Supplementary material
Source: ML conference proceedings conference paper supplement (https://proceedings.neurips.cc/paper_files/paper/2021/hash/0fd600c953cde8121262e322ef09f70e-Abstract.html)
Supplement: Supplementary file 1 [file 0fd600c953cde8121262e322ef09f70e-Supplemental.zip › Supplementary_Material_Paper_8745/data/Hamaguchi-BM_head-1000/test/test-graph.txt]

38095	3	5758
38039	0	16545
38039	2	17401
37887	0	14554
37887	2	6401
37887	2	21953
37887	2	33167
37887	2	17646
37887	2	34396
38056	2	32496
38167	0	21781
38167	6	32151
38167	6	27865
38167	6	21969
38167	6	33896
38167	6	24153
38167	6	22519
38167	6	35926
38167	6	668
38167	6	22820
38167	6	18259
38167	6	3249
38167	6	10330
38167	6	13289
38167	6	35108
38167	6	20172
38167	6	8536
38167	6	33922
38167	6	21006
38167	6	13660
38167	6	30314
38167	6	3344
38167	6	37453
38167	6	29151
38167	6	22647
38167	6	15884
38167	6	5269
38167	6	26837
38167	6	26364
38167	6	7212
38167	6	34728
37852	8	3499
37852	8	11789
37899	3	19191
37899	6	25386
37899	6	13588
38008	0	9338
37948	6	26376
37948	6	614
37948	6	35865
37948	6	20388
37948	6	33741
37922	9	27724
37922	9	2901
37922	9	5366
37922	9	12472
37922	9	23687
37922	9	35403
37922	9	26018
37922	9	31575
37870	6	16904
37870	6	22155
37870	6	28690
37870	6	32260
37870	6	1128
37870	6	29509
37870	6	18655
37870	6	18147
37870	6	20130
37870	6	1207
37870	6	224
38155	0	19163
38155	3	23786
38155	6	23864
4070	3	37858
38097	5	23019
38097	5	8785
38097	5	27342
38064	5	10353
38013	10	17116
38013	5	37209
38013	2	24076
38013	5	13027
38013	5	7721
38013	5	2189
38013	5	18281
38013	5	16484
38013	5	9056
38013	5	17252
38013	5	1061
38013	5	14281
38013	5	8395
38013	5	9950
38013	5	15526
38013	5	34590
38013	5	11569
38013	5	17582
38013	5	35889
38013	5	29485
38013	5	6921
38013	5	17636
38013	5	27593
38013	5	23015
38013	5	31350
38013	5	19773
38013	5	24712
38013	5	9690
38013	5	28374
31557	4	38003
22100	0	37886
38154	0	1763
38154	5	34804
37857	0	7456
37857	0	1042
37857	2	7466
37980	8	8514
37980	4	18650
37973	6	2446
38005	3	26288
38005	6	10504
19926	0	38080
37868	0	31757
38125	0	1561
38125	2	22123
38125	2	479
38125	2	20316
38125	2	8517
38125	2	17461
38125	2	8841
38125	2	3308
38125	2	30895
38125	2	31144
38125	2	30838
26894	0	37984
36797	3	38152
38035	0	35261
38035	2	6124
37923	4	30849
37923	4	25134
37923	2	32342
37923	2	13449
37923	2	36227
37923	2	10462
37923	2	26959
37923	2	12252
38186	2	16414
21187	8	37898
27040	8	37898
16744	1	37869
38003	0	33910
38003	4	35643
38003	5	2325
38003	5	29892
38003	5	11845
38003	5	31557
38003	5	32293
38003	5	559
38003	5	10449
38003	5	34218
37927	0	31098
37916	8	14993
37916	1	20995
37709	3	37859
31555	3	38000
37825	8	38103
11116	4	37955
12500	0	38175
17390	4	38184
38011	2	6849
38136	9	26405
38136	9	22462
38136	9	27705
38136	9	19746
38136	9	15629
38136	9	10382
38136	9	20128
38136	9	14294
38136	9	35013
38136	9	2181
38136	9	24932
38136	9	9090
38136	9	26807
38136	9	8490
38136	9	19177
38136	9	29441
38136	9	27374
38136	9	27034
38136	9	36699
38136	9	30259
38136	9	36747
38136	9	29903
38136	9	34281
38136	9	34288
38136	9	22591
38136	9	2857
38136	9	23357
38136	9	34477
38136	9	37352
38136	9	19610
38136	9	13952
38136	9	33718
38136	9	23012
38136	9	29512
38136	9	7030
38136	9	29006
38136	9	24419
38136	9	16513
38136	9	23313
38136	9	16630
38136	9	23549
38136	9	31900
38136	9	3484
38136	9	2242
38136	2	22604
38136	9	32856
38136	9	34667
38136	9	4422
38136	9	30635
38136	9	953
38136	9	16096
38136	9	4624
38136	9	9516
38136	9	17814
38136	9	14795
38136	9	27532
38136	9	19561
38136	9	28257
38136	9	18297
38136	9	32673
38136	9	10206
38136	9	36770
38136	9	26103
38136	9	25719
38136	9	7109
38136	9	13448
38136	9	34310
38136	9	25519
38136	9	10195
38136	9	15572
38136	9	12256
38136	9	23689
38136	9	36389
38148	3	24145
38148	2	27381
37968	4	29208
37968	5	19380
37968	5	1843
37968	5	5941
37968	5	10942
37968	5	31533
37876	6	36331
38150	0	19400
38150	4	33707
38062	2	28535
38062	2	2259
38124	0	22698
38124	6	20625
38124	6	5414
38124	6	31941
38124	6	11419
9219	0	37864
37918	0	26010
37918	3	21218
37918	2	24928
37918	2	10545
37918	2	12053
37918	2	20602
37918	2	18711
37918	2	14233
37918	2	3029
37918	2	15789
37918	2	9715
37918	2	10429
37918	2	30721
37918	2	25306
37918	2	26974
37918	2	30066
37918	2	4026
37918	2	19019
37918	2	25925
37918	2	4333
37918	2	5758
37918	2	29406
37918	2	13768
37918	2	24392
37918	2	13484
37918	2	4061
37918	2	31382
37918	2	32916
37918	2	18500
37918	2	30120
37918	2	27078
37918	2	30836
37918	2	34313
37918	2	2128
37918	2	34851
37918	2	37591
37918	2	35301
37918	2	36256
37918	2	30722
37918	2	19215
37918	2	33030
37918	2	37335
37918	2	407
37918	2	25311
37918	2	6930
38065	3	24656
38065	6	28127
38138	0	2516
37998	2	4810
37998	2	15732
37998	2	7404
37998	2	24304
38021	2	24394
38021	2	9868
38021	2	9543
38073	0	34405
38073	5	37154
38044	3	35799
38044	6	15698
38044	6	31970
38044	6	31913
38044	6	29632
38044	6	8433
38044	6	22287
38044	6	3967
38044	6	13868
37947	2	34056
37947	2	4803
37991	2	22768
37991	2	11090
37991	2	1936
37991	2	20415
37991	2	6984
37991	2	13089
37991	2	31111
37991	2	3712
37991	2	22880
37991	2	23953
37991	2	35140
37978	3	14369
37978	6	20837
38059	0	19531
38059	6	28930
38059	6	8207
38059	6	10205
38059	6	33416
38059	6	26608
38102	0	22824
38102	2	8356
38102	2	3005
38102	2	27631
38102	2	20661
38102	2	23427
38169	2	15158
38169	2	18138
38169	2	37609
38169	2	11671
38169	2	13504
38169	2	22574
38169	2	29656
38169	2	25319
38169	2	25035
38169	2	30874
38169	2	25137
38169	2	5404
38169	2	11466
38169	2	18076
38169	2	14465
38169	2	20723
38169	2	11337
38169	2	15950
38169	2	10226
38169	2	2580
38169	2	6595
38169	2	33498
38169	2	18880
38169	2	15251
38169	2	3074
38169	2	28549
38169	2	33281
38169	2	23443
38169	2	28712
38169	2	16567
38169	2	17681
38169	2	22498
38169	2	13350
38169	2	30652
38169	2	20036
38169	2	4204
38169	2	33239
38169	2	37391
38169	2	23087
38169	2	30432
38169	2	30766
38169	2	29020
38169	2	34460
38169	2	34784
38169	2	6557
38169	2	1636
38169	2	33891
38169	2	32138
38169	2	32913
38169	2	33080
38169	2	33762
37938	0	21589
37938	2	23386
37938	2	37281
23147	0	37924
38170	3	6265
38170	6	10817
38040	2	11942
37878	0	33845
37878	6	13610
37990	0	36038
37990	6	16566
37990	6	15521
37938	2	35205
37867	3	22092
38106	0	9233
38106	2	13174
38106	2	24400
38106	2	15002
38106	2	29851
37859	6	35440
37859	6	33851
37859	6	10954
37859	6	26895
37859	6	16830
37859	6	17518
37859	6	18577
37859	6	25625
37859	6	28970
37859	6	24654
37859	6	3758
37859	6	12286
37859	6	4450
37859	6	1025
37859	6	18326
37859	6	21624
37859	6	24983
37859	6	2780
37859	6	13328
37859	6	16614
37859	6	19121
37859	6	9048
37859	6	14079
37859	6	25950
37859	6	18790
37859	6	29087
37859	6	37709
37859	6	5546
37859	6	8987
37859	6	36211
37859	6	4908
37859	6	21958
37859	6	7335
37859	6	23146
37859	6	29910
37859	6	34579
37859	6	32906
37859	6	28245
37859	6	23719
37859	6	16324
37859	6	10310
37859	6	7526
37859	6	20667
37859	6	9749
37859	6	37748
37859	6	15191
37859	6	397
37859	6	12186
37859	6	8288
37859	6	33063
37859	6	14858
37859	6	33430
37859	6	19936
37859	6	22388
37859	6	20560
37859	6	21995
37972	3	5378
37972	6	14893
8586	4	37905
38157	0	14554
38157	3	20056
38157	2	29205
38157	2	13085
4204	0	38169
37970	3	35687
38100	6	14263
38006	1	2651
38006	2	34557
38087	6	6519
38084	0	9937
38084	3	30018
38084	6	31065
38084	6	24847
38084	6	33771
37909	5	260
37874	0	26412
37874	9	37202
37874	2	5371
37874	5	36469
37874	5	26631
37874	5	17956
37874	2	3518
37874	5	4074
37874	5	19221
37874	5	14430
37874	5	32873
37874	5	34614
37874	2	26320
37874	5	34374
37874	5	8019
37874	2	35003
37874	5	9295
37874	5	21356
37874	5	6896
37874	5	28668
37874	5	18746
37874	5	37677
37874	2	18872
37874	5	29835
37874	9	2385
37874	9	26674
38147	2	32895
38147	2	28835
38147	2	4794
38147	2	21108
38147	2	27783
38147	2	16099
38147	2	14166
38147	2	14345
38067	0	25857
38067	6	26889
38190	2	10069
3249	3	38167
38103	2	33811
38103	2	37825
38103	2	13108
38103	2	26796
38103	2	26234
38103	2	13701
38103	2	21274
38103	2	30256
38071	8	20565
38071	5	6789
38071	5	2960
38071	5	24364
38071	5	13058
38071	5	6263
38071	5	25815
38071	5	33253
38071	5	30532
38071	5	1427
38071	5	27480
15029	3	37863
38114	0	20583
38114	2	34945
38114	2	22426
38114	2	1232
38114	2	9824
38114	2	1513
38114	2	36622
38114	2	34064
37956	4	5441
38172	0	29839
38057	3	26693
38057	6	8106
38057	6	17132
38057	6	21132
38057	6	21668
38057	6	33056
38057	6	9792
18500	0	37918
38101	8	14223
17173	8	38163
37853	3	3942
37853	6	37764
37853	6	14380
38020	0	8501
38020	2	28745
38020	2	10744
38066	0	30414
38030	5	32248
23146	3	37859
931	3	38070
38123	2	5831
38027	2	18632
38027	2	17766
38027	5	360
38029	0	37583
38029	4	32534
38029	4	3437
38029	4	8697
38029	2	34256
37964	8	261
37964	4	12011
37964	3	15338
37964	10	13569
37964	10	7545
37964	10	21683
37964	10	29803
37964	10	34506
37964	5	21049
37964	5	4354
37964	5	16278
37964	6	8359
37964	10	22959
13822	0	37969
38116	6	615
38077	1	2651
38077	2	18133
38077	2	31522
37894	2	19993
37894	2	11470
37894	2	14102
37894	2	19373
37894	2	2635
37894	2	3547
37894	2	34004
37894	2	31520
37894	2	32937
37894	2	17373
37894	2	23505
37894	2	36532
37894	2	8279
38016	0	32712
38016	5	29331
38016	2	36441
38016	2	22215
38016	2	36125
38016	2	20204
38016	2	29445
38016	2	6073
38016	2	29287
38016	2	33714
21008	0	38110
37934	2	18893
37934	2	23756
38163	2	25023
38163	2	29169
38163	2	26790
38163	2	16861
38163	2	494
38163	2	8261
38163	2	27200
38163	2	10742
38163	2	16977
38163	2	33938
38163	2	14272
38163	2	13744
38163	2	17173
38163	2	10719
38163	2	31465
38163	2	31464
38163	2	1739
38163	2	19024
38104	3	32711
38104	6	21866
34966	4	38146
38074	8	8514
38074	4	19515
38109	4	15832
38109	4	28482
38109	4	1624
38050	2	17730
38050	2	3011
38050	2	676
33811	8	38103
37942	0	32712
37942	2	28018
37942	2	16814
37942	2	32732
37942	2	16477
37902	3	5705
37902	6	37013
38009	2	28416
38009	2	15828
38115	4	10502
38115	5	14846
38115	5	26130
38115	5	10984
38115	5	7203
38115	5	33773
38115	5	37597
38115	5	10527
38115	5	26427
38115	5	33839
38141	0	26081
38110	0	123
38110	2	33073
38110	2	20110
38110	2	21008
38110	2	28798
37863	6	18972
37863	6	8916
37863	6	32061
37863	6	17505
37863	6	3336
37863	6	29820
37863	6	12917
37863	6	24760
37863	6	20266
37863	6	17728
37863	6	19200
37863	6	23600
37863	6	15029
37863	6	8578
37863	6	26183
38122	2	25783
38122	2	22878
38122	2	34537
38122	2	14346
1638	0	38010
38133	0	19531
38133	3	29377
10366	0	38025
4325	4	38051
37890	0	4858
38024	0	3976
38024	6	34313
38145	0	11388
38145	1	26197
37886	2	31083
37886	2	22100
38042	8	16464
38042	8	16344
1648	0	38142
38149	6	15495
38149	6	23660
38080	0	37063
38080	0	9102
38080	2	7110
38080	2	32162
38080	2	28484
38080	2	14314
38080	2	29341
38080	2	35978
38080	2	701
38080	2	3294
38080	2	271
38080	2	22556
38080	2	19926
38080	2	33340
38080	2	625
38080	5	6819
37920	2	1516
37920	2	3238
29066	3	37977
38112	6	6389
37945	0	32819
37945	2	6414
38010	2	1638
38010	2	9665
38010	2	37490
38010	2	15982
38010	2	17774
37888	2	29990
37888	2	25736
37888	2	8141
37888	2	25848
37888	2	27510
37888	2	28115
37888	2	24732
38082	8	26738
38082	4	20570
38082	9	27582
38082	9	11319
38082	9	23895
38082	9	28526
38082	9	9824
38082	9	35619
38082	9	29913
38082	9	18343
38082	9	25024
38082	9	35842
38082	9	23402
38082	9	12972
38082	9	5411
38082	9	17702
38082	9	37003
38082	9	15013
38045	1	24339
38045	2	34146
15752	0	38049
38092	0	3842
38119	0	25712
38119	0	10086
38119	4	18106
38060	0	4407
38060	9	9282
38060	9	5754
38060	9	2231
38060	9	36775
38060	9	27117
38060	9	32301
38060	9	21499
38060	9	27282
38060	9	31611
38060	9	33976
38060	9	8435
38060	9	9629
38060	9	35090
38060	9	13451
38060	9	17200
38060	9	2324
38060	9	28812
38060	9	13429
38060	9	27582
38060	9	5626
38060	9	32748
38060	9	17541
38060	9	23075
38060	9	22453
38060	9	18101
38060	9	13271
38060	9	6417
38060	9	14133
38060	9	31035
38060	2	33375
38060	2	20668
38060	2	30502
38060	2	15953
38060	2	6953
38060	2	29576
38060	2	33053
38060	9	21155
38060	9	32908
38060	9	16752
38060	9	34767
38060	9	30417
38060	9	21597
38060	9	36125
38060	9	3606
38060	9	21838
38060	9	37475
38060	9	32972
38060	9	23976
38060	9	26188
38060	9	36029
38060	9	25516
38060	9	6108
38060	9	5691
38060	9	6253
38060	9	1464
38060	9	3435
38060	9	14940
38060	9	32979
37931	8	32289
37895	6	19133
37895	6	20472
37905	8	21486
37905	4	25562
37905	5	20923
37905	5	23522
37905	5	14381
37905	5	24472
37905	5	8586
37905	5	15331
37905	5	19500
37905	5	37185
38069	0	11794
38069	6	8740
38047	2	7539
37849	0	11631
37849	3	12983
37992	0	12940
37992	9	27315
37992	9	26227
37992	2	26566
37992	9	6222
37992	9	13570
37992	9	15907
37992	9	567
37992	9	14113
37987	6	22266
37930	3	28714
8359	3	37964
38164	4	6642
38164	5	32633
38156	6	3865
38184	0	1561
38184	5	33739
38184	5	17390
38184	5	33961
38089	8	25215
38089	4	367
38089	4	22266
38089	5	11210
37854	0	34037
37854	2	18063
37854	2	15166
37854	2	19232
37854	2	32372
37854	5	4342
37997	3	13512
37997	5	32282
37951	8	35277
38079	3	16890
37940	0	46
37940	6	1350
37940	6	2375
27342	4	38097
38063	2	13077
38063	2	5733
38063	2	10349
38063	2	37233
38063	2	18978
38003	4	11421
37910	0	15054
37952	0	15322
37952	2	32242
37952	2	23287
38143	0	15388
38143	6	20980
38051	8	2761
38051	4	17587
38051	4	16599
38051	10	603
38051	10	11875
38051	10	17050
38051	10	3410
38051	5	4325
38051	5	10207
38051	5	35452
38051	5	22570
38051	5	30583
38051	5	23767
38051	5	24615
38051	5	17165
38051	5	25244
38051	5	466
38051	5	0
38051	6	23410
37848	5	6052
37848	5	23251
37848	5	33386
37848	5	889
37848	5	32682
37848	5	26683
37848	5	29744
37848	5	11071
37848	5	10442
37848	5	18562
37848	5	16673
37848	5	27492
37848	5	8541
34310	1	38136
38161	3	17876
38161	6	6809
38012	3	10594
37862	0	5513
37862	1	10401
37862	2	10116
37862	2	34059
37907	0	15718
37907	3	27346
38117	1	32163
38117	2	13625
38117	2	7861
37965	3	20339
37965	2	13189
38036	2	22883
38046	6	13402
38046	6	20833
37962	0	1323
37962	3	28653
37893	5	2389
37893	6	34321
37869	9	16744
37869	9	25565
37869	9	9750
37869	9	20018
37869	9	32109
37869	9	5949
37869	9	33708
37869	9	22865
37869	9	37625
37869	9	25187
37869	9	16058
37869	9	7299
37869	9	5121
37869	2	30759
37869	2	20255
37869	2	21553
37869	9	13036
37869	2	24462
37869	2	1454
37869	2	37177
37869	2	12981
37869	2	8412
37869	2	7490
37869	2	30293
37869	2	35324
37869	2	1307
37869	2	28248
37869	9	4161
37869	9	36384
37869	9	15087
37869	5	30394
37869	9	26378
37869	2	32773
37869	9	16186
37869	9	32930
37869	9	4491
37869	9	23709
37869	9	18767
37869	9	24301
37869	9	36590
37869	9	30717
35799	6	38044
38134	2	23159
38134	2	26421
38134	2	16607
38134	2	27161
38134	2	12562
38037	0	19163
38037	6	32137
38159	3	3413
38159	2	13654
38159	2	15218
38159	2	35598
38159	2	28180
38166	0	9864
38166	2	2813
38166	2	25061
38166	2	26219
38166	2	21831
38166	2	13569
38166	2	1056
38166	2	18394
38166	2	9670
38090	9	25484
38090	9	4068
38090	5	6922
38090	2	6359
38090	2	19252
38090	2	15241
38090	2	11725
38090	2	16799
38090	2	11909
38090	2	22055
38090	2	415
38090	2	2461
38090	5	26081
38090	9	34666
38090	9	20303
38090	9	35525
38090	2	29332
38090	2	23894
38090	2	16186
38090	2	23856
38090	9	32041
38090	9	14669
38171	0	11852
38171	2	18678
37896	2	18588
5781	0	37892
37966	0	32348
37966	3	25560
37966	6	19026
37966	6	10928
37860	2	3672
37860	2	8074
37860	2	19126
37860	2	19670
37860	2	12754
37860	2	4634
37860	2	12511
37860	2	7707
37860	2	601
37860	2	27649
37860	2	24906
37860	2	6716
37860	2	22628
10817	3	38170
37865	6	4186
37861	2	21938
37861	2	24428
37861	2	28895
38091	0	12333
38091	2	1401
38091	2	32630
38091	2	30672
38091	2	21340
38091	2	10807
38091	2	19847
37677	4	37874
37190	0	38034
38094	4	14554
38094	4	13181
38094	4	6400
38094	2	37742
2516	2	38138
38188	6	8837
37986	3	17595
38001	8	1949
37929	6	23942
13162	0	38151
38017	0	7342
38017	2	4163
38017	2	14982
38017	2	24964
38017	2	12228
38017	2	36135
2206	0	37988
21866	3	38104
37898	0	15924
37898	2	11519
37898	2	25235
37898	2	24415
37898	2	21622
37898	2	23057
37898	2	26363
37898	2	17919
37898	2	872
37898	2	25004
37898	2	5905
37898	2	20520
37898	2	3091
37898	2	19040
37898	2	15419
37898	2	25723
37898	2	33275
37898	2	23182
37898	2	3003
37898	2	32546
37898	2	4345
37898	2	15356
37898	2	37799
37898	2	225
37898	2	35947
37898	2	8650
37898	2	19790
37898	2	34605
37898	2	29461
37898	2	10347
37898	2	18022
37898	2	32155
37898	2	17645
37898	2	7295
37898	2	35576
37898	2	33008
37898	2	16309
37898	2	5502
37898	2	21187
37898	2	34877
37898	2	20132
37898	2	31362
37898	2	19032
37898	2	3880
37898	2	20235
37898	2	31239
37898	2	4337
37898	2	10721
37898	2	27918
37898	2	18685
37898	2	19858
37898	2	27788
37898	2	865
37898	2	27849
37898	2	9612
37898	2	32800
37898	2	23163
37898	2	27404
37898	2	930
37898	2	27690
37898	2	21172
37898	2	35142
37898	2	33456
37898	2	27726
37898	2	18718
37898	2	33319
37898	2	31761
37898	2	20691
37898	2	15060
37898	2	82
37898	2	17664
37898	2	12041
37898	2	36904
37898	2	37173
37898	2	5860
37898	2	3790
37898	2	33282
37898	2	1057
37898	2	5026
37898	2	36371
37898	2	16724
37898	2	9943
37898	2	26766
37898	2	25378
37898	2	13892
37898	2	27378
37898	2	28319
37898	2	8622
37898	2	28939
37898	2	37585
37898	2	8656
37898	2	1380
37898	2	9786
37898	2	22439
37898	2	15857
37898	2	35437
37898	2	8818
37898	2	9153
37898	2	23136
37898	2	28551
37898	2	19882
37898	2	10275
37898	2	11029
37898	2	27420
37898	2	20731
37898	2	27040
37898	2	26651
37898	2	37376
37898	2	32829
37898	2	5635
37898	2	19743
37898	2	36638
37898	2	16771
37898	2	30950
37898	2	23712
37898	2	33103
37898	2	28693
37898	2	28290
37898	2	7252
37898	2	641
37898	2	12538
37898	2	36364
37898	2	34573
38144	3	10849
38144	6	14478
38053	2	3884
38118	0	5869
38118	1	1439
38180	3	11848
38180	6	18452
38180	6	1687
38180	6	22068
38180	6	5544
38180	6	20494
38180	6	18540
37904	0	9984
37904	6	18223
37904	6	16785
37904	6	22224
37904	6	16497
37904	6	30098
37911	2	29991
37911	2	24128
37911	2	17377
1042	2	37857
3715	0	37872
38034	0	6576
38034	2	13263
38034	2	15138
38034	2	37535
38034	2	22957
38034	2	31996
38034	2	30617
38034	2	37190
38034	2	27118
38034	2	3478
38034	2	21975
38034	2	34885
38034	2	9262
38034	2	2173
38171	2	11704
38171	2	36214
38171	2	28756
38171	2	1554
38171	2	7148
38171	2	28066
38129	0	24491
38129	2	32219
38129	2	37122
38129	2	28254
38129	2	19715
38129	2	28861
38129	2	19664
38129	2	26699
38129	2	23378
38129	2	7757
38179	0	8169
38179	2	9603
38179	2	27504
38179	5	35709
38179	2	23909
38179	5	8637
37993	6	27805
37993	6	12397
37993	6	25985
37993	6	20020
37993	6	5043
38165	0	7317
38165	1	2651
38165	2	23280
38165	2	22136
38165	2	21605
38165	2	486
38165	2	34889
38165	2	28853
38189	5	26812
38173	2	15484
37994	3	34959
37996	4	28098
37996	4	26675
38187	0	2151
38187	6	8735
38187	6	15062
28535	0	38062
38142	2	34186
38142	2	8699
38142	2	6192
38142	2	12751
38142	2	1648
38142	2	22327
38142	2	7485
38142	2	12332
9241	0	37864
37882	1	5927
37882	1	6804
37882	2	34882
31754	4	37982
20110	0	38110
38027	2	31574
37928	0	15320
37928	4	20857
37928	2	13571
37928	2	22323
37928	2	30452
37928	2	3013
37928	2	33831
37928	2	32907
37928	2	21293
37928	2	15739
37928	2	9894
37928	2	28164
37928	2	7091
37928	2	2989
37928	2	1681
37928	2	23254
37928	2	27018
37928	2	911
37928	2	10753
37928	2	8299
37928	2	5251
37928	2	30661
37928	2	30604
37928	2	28672
37928	5	35727
37928	2	21382
37928	2	29905
37928	2	5717
37928	2	36177
37928	2	33459
37928	2	5992
37928	2	10074
37928	2	2529
37928	2	14268
37928	2	5334
37928	5	14645
37928	2	19461
37928	5	4352
37928	5	35756
37928	5	25782
37928	2	1567
37928	2	18909
37928	2	9809
37928	2	10230
37928	2	28083
37928	2	18303
37928	2	32756
38185	0	19163
38185	6	26100
37871	0	9937
37871	3	10850
37871	6	17606
37871	6	17391
37871	6	30476
37871	6	14636
37871	6	2055
37871	6	18612
37871	6	15518
38151	0	21781
38151	2	13162
38151	6	22923
38108	2	20317
38108	2	1902
38108	2	15773
37932	8	2068
37932	4	22976
37932	5	29939
37932	5	24324
37932	5	28390
37932	5	14484
37932	5	35509
37932	5	8486
37932	5	26263
37932	5	11532
37932	5	14421
37932	5	35900
37932	5	37592
37932	5	19871
37932	5	14502
37932	6	4862
37391	0	38169
29990	0	37888
38083	2	3135
38083	2	9530
37949	0	6515
37949	5	19542
37949	2	8382
37949	2	8827
37976	2	13138
16096	1	38136
38088	3	9728
38088	6	23837
8068	0	37903
37981	2	13475
37967	4	16910
38099	0	19749
38099	2	16984
37950	2	4266
37906	3	2061
37906	6	32090
37906	6	5948
37906	6	17506
38162	0	22425
38162	6	24949
38162	6	36002
38162	6	16974
38162	6	19515
38162	6	22774
38162	6	8890
38162	6	37097
38162	6	17096
38162	6	14245
38162	6	26713
38120	0	27295
38120	9	6510
38120	9	15124
38120	9	27019
38120	9	10493
38120	9	34306
38120	9	22909
38120	5	19503
38120	9	15080
38120	9	11715
38120	9	35730
38120	9	23936
38120	9	5361
38120	9	3037
38120	9	20425
38120	9	5489
38120	9	28162
38120	9	28185
38120	9	18148
38120	9	14609
38120	9	27811
38120	9	18001
38120	9	6106
38120	9	16326
38120	9	16803
38120	9	5210
38120	9	28123
38191	2	32394
38191	2	34433
38022	0	32712
37924	2	37471
37924	2	10684
37908	4	2513
37908	1	25215
37908	2	10402
37999	2	4978
37999	2	20760
38085	0	24184
37935	0	11794
37935	3	30188
37935	6	1827
37935	6	5273
37935	6	9706
37935	6	9493
37935	6	23291
37935	6	37150
37935	6	14129
37935	6	33911
37935	6	3743
37935	6	31160
38031	3	8717
38031	6	15256
38031	6	36067
38153	0	29654
38153	2	31298
37979	0	7287
37979	2	14330
37971	2	22687
37971	2	6934
34374	4	37874
38183	0	11794
38183	3	22933
38183	6	17023
37954	2	8490
37954	2	24813
37954	2	18476
37954	2	33729
37954	2	11729
37954	2	13347
37954	2	5749
37954	2	25338
37954	2	32774
37954	2	22858
37954	2	23417
37954	2	28614
38132	2	4615
38132	2	4434
37872	0	22867
37872	2	8067
37872	2	5639
37872	2	30527
37872	2	34379
37872	2	31110
37872	2	13647
37872	2	30342
37872	2	26772
37872	2	9078
37872	2	23705
37872	2	32349
37872	2	36395
37872	2	29985
37872	2	3715
37872	2	986
37872	2	24017
37872	2	30139
38015	6	36848
38152	0	11794
38152	6	6806
38152	6	784
38152	6	5572
38152	6	36797
38152	6	25280
38152	6	10362
38152	6	14369
38152	6	35687
38152	6	21635
38152	6	25847
38152	6	586
38152	6	2638
38152	6	18772
38152	6	16988
38152	6	37215
38152	6	1900
38152	6	26693
38178	0	33910
38178	4	10449
37900	0	33845
37900	6	4954
37900	6	31240
37900	6	12104
37900	6	30277
21471	3	38126
38048	0	5836
38048	4	11648
38048	2	22169
38048	2	8503
38048	5	22783
37941	3	16714
37846	2	3098
37846	2	32947
37846	2	8256
37846	2	168
37846	2	25534
37846	2	12314
37846	2	3989
38140	0	26411
38140	2	21004
38140	2	33221
38140	2	132
38026	4	4671
37873	8	36837
37873	4	16586
32061	3	37863
37877	5	8384
38014	2	4567
38014	2	2359
1454	0	37869
38025	0	28839
38025	2	34570
38025	2	14800
38025	2	21574
38025	2	13938
38025	2	27156
38025	2	35927
38025	2	2667
38025	2	35873
38025	2	8746
38025	2	34135
38025	2	5981
38025	2	35097
38025	2	20925
38025	2	10848
38025	2	10366
38025	2	248
38025	2	30029
38025	2	26127
38025	2	21424
38025	2	34116
38025	2	17481
38025	2	9447
38025	2	35991
38025	2	31085
38025	2	34046
38025	2	10279
38025	2	24923
38025	2	16308
38025	2	27051
38025	2	24956
38025	2	24018
38025	2	22669
38025	2	24994
38025	2	32317
38025	2	6228
38025	2	3906
38025	2	21485
38025	2	13902
38025	2	7470
38025	2	22529
38025	2	25052
38025	2	16074
38025	2	72
38025	2	9878
38025	2	34203
38025	2	4536
38025	2	10498
37885	0	3554
37885	2	13231
37885	2	10346
37885	2	22981
37885	2	7498
37885	2	4778
37885	2	3239
37885	2	27232
37885	2	31859
37885	2	15154
37885	2	29376
37885	2	7082
37885	2	8442
37885	2	31105
37885	2	5665
37885	2	3184
37885	2	7973
37885	2	10076
37885	2	34144
37885	2	21274
37885	2	18623
37885	2	2498
37885	2	25247
37885	2	20866
37885	2	30256
38028	3	28241
38098	0	12962
38098	2	12922
37879	0	15388
37879	6	14182
27374	1	38136
38182	0	2970
38182	0	23073
38182	9	6175
38182	9	2608
38182	9	24722
38182	5	14271
38182	5	36399
38182	9	25071
37892	0	30771
38135	2	35564
38135	5	5207
38135	2	32227
38135	2	33182
38135	2	5231
38135	2	37533
38139	0	32388
38139	4	28546
38139	2	10502
38139	2	16427
38139	2	15842
38139	2	29719
38139	2	14033
38139	2	13292
38139	2	12536
37988	3	10976
37988	2	16073
37988	2	35457
37988	2	2206
37975	4	4290
37975	10	13775
37975	5	28425
37963	6	10806
38093	6	16709
37864	2	22681
37864	2	37082
37864	2	9219
37864	2	12191
37864	2	22179
37864	2	9241
38007	0	5337
38007	2	8895
38158	0	12184
38158	2	20547
38070	6	28156
38070	6	931
14079	3	37859
38061	6	7200
37953	0	5691
37953	2	30456
37953	2	28203
38126	6	21471
38126	6	33036
38175	0	29077
38175	5	30218
38175	2	36476
38175	2	32865
38175	2	12500
38175	2	17768
38175	2	37648
38175	2	13226
38175	2	13759
37983	4	28300
38121	6	967
38121	6	23537
38121	6	36566
38121	6	18774
37989	6	31373
38000	6	34386
38000	2	1498
38000	6	31555
38000	6	32549
38000	6	6183
38000	6	10878
38078	6	5628
37961	8	1822
37961	5	18789
38075	0	32681
38146	8	25771
38146	5	22908
38146	5	34966
38146	5	24344
38146	5	14727
38146	5	3859
38146	5	25106
38146	5	23572
38049	0	21493
38049	5	994
38049	5	33581
38049	2	15752
38049	5	18185
38049	2	12175
37959	0	15385
37959	4	6136
38054	2	29735
38054	2	16155
13368	0	37937
37845	0	1980
37845	2	867
37845	2	11791
37845	2	1274
37845	2	18778
37845	2	29773
22266	3	37987
37958	0	19972
37958	6	29037
37958	2	14026
37958	2	33379
37958	2	17513
37955	4	22976
37955	3	23411
37955	10	10607
37955	10	11327
37955	10	34966
37955	10	2657
37955	10	20170
37955	10	36336
37955	10	26255
37955	10	16877
37955	10	36402
37955	10	11392
37955	5	12458
37955	10	9279
37955	10	5190
37955	10	37112
37955	10	16332
37955	10	31662
37955	10	4472
37955	10	10654
37955	10	3627
37955	10	29233
37955	5	20296
37955	5	14728
37955	5	12384
37955	5	11116
37955	5	24596
37955	10	24596
37955	5	16934
37955	5	22731
37955	5	20892
37955	5	15332
37955	5	22248
37955	5	5502
37955	5	36330
37955	5	37316
37955	5	24306
37955	5	32995
37955	5	6844
37955	5	31416
37955	5	26457
37955	5	19584
37955	5	8811
37955	5	2604
37955	5	31961
37955	5	3328
37955	5	6587
37955	5	21102
37955	5	21133
37955	5	5149
37955	5	26152
37955	5	23031
37955	5	3433
37955	5	9421
37955	5	21221
37955	5	33149
37955	6	35738
37955	6	33465
7091	0	37928
38168	6	6235
38168	6	15578
32282	4	37997
16099	0	38147
38105	8	8514
38096	8	261
38096	4	21425
37914	2	27625
37851	2	10882
37851	2	24643
37851	2	13523
37851	2	7352
38111	1	2651
37933	0	25857
37933	6	20071
27118	0	38034
37995	4	20982
37995	5	37360
37995	5	26293
37881	0	28839
37881	6	35067
37881	6	25041
37936	0	12296
37936	2	173
37936	2	24454
6557	0	38169
38023	0	25195
38023	2	34276
38023	2	29700
38023	2	1627
38023	2	18698
38002	3	20167
38002	6	15104
34037	2	37854
37883	3	20372
37883	6	36591
10207	4	38051
37913	5	27059
10545	0	37918
38181	3	16076
38181	2	1606
38113	0	24619
38113	6	28741
38019	4	34880
38019	1	24339
38019	5	8233
37884	8	21486
37884	5	30758
37884	5	11521
37884	5	10445
37884	5	18290
37884	5	10821
37884	5	1617
37884	5	12752
37884	5	8544
37884	5	33687
37884	5	12882
37884	5	21400
37884	5	35960
37884	5	37761
37884	5	13446
37884	5	37802
37884	5	8510
37884	5	1008
37884	5	24187
37884	5	12399
37884	5	17120
37884	5	14276
37884	5	19210
37884	5	2353
37884	5	15198
37884	5	36299
37884	5	37619
37935	6	3025
38177	3	8158
38177	6	27523
37850	0	19243
37850	2	26568
37850	2	31663
37850	2	22260
784	3	38152
37915	4	540
37915	4	7478
37915	4	18106
37915	5	33000
8650	8	37898
37939	3	8158
37939	6	16074
37880	6	33541
37880	6	4670
35091	2	38132
37982	3	17196
37982	2	2410
37982	5	31754
37919	0	23481
37919	2	68
38033	2	17615
38033	2	15681
38033	2	694
38033	2	13832
38033	2	9620
38033	2	28135
38033	2	3572
38033	2	2797
38033	2	3933
38033	2	17163
38033	2	1121
38033	2	25175
38033	2	31294
38033	2	27803
38033	2	21616
38033	2	24694
38033	2	4283
38033	2	7529
38033	2	14951
37944	4	17247
37944	5	20117
37944	5	4031
37944	5	21775
37944	5	4424
38130	2	17812
38130	2	2048
38130	2	6060
38130	2	17305
38130	2	866
38130	2	35760
38130	2	14878
38130	2	35560
38130	2	1114
38130	2	955
38130	2	11711
37889	0	22755
37889	2	1117
37889	2	33605
37903	2	25132
37903	2	1093
37903	2	16297
37903	2	16281
37903	2	5587
37903	2	20371
37903	2	6743
37903	2	8068
37903	2	19255
37856	3	35022
38072	0	15388
38072	6	22614
37937	2	34263
37937	2	11931
37937	2	19766
37937	2	20081
37937	2	34092
37937	2	3585
37937	2	11436
37937	2	18644
37937	2	29469
37937	2	22042
37937	2	37
37937	2	18479
37937	2	5399
37937	2	9780
37937	2	18367
37937	2	9201
37937	2	2325
37937	2	9071
37937	2	17600
37937	2	29892
37937	2	6004
[truncated: 2,352 more rows]
