# Supplementary material
Source: ML conference proceedings conference paper supplement (https://proceedings.neurips.cc/paper_files/paper/2021/hash/0fd600c953cde8121262e322ef09f70e-Abstract.html)
Supplement: Supplementary file 1 [file 0fd600c953cde8121262e322ef09f70e-Supplemental.zip › Supplementary_Material_Paper_8745/data/Hamaguchi-BM_head-1000/test/test-random-sample/test2.txt]

38095	0	14128	1
27532	9	11193	0
38039	2	22462	1
15578	6	37968	0
37887	2	22510	1
10074	4	18500	0
38056	0	9511	1
15739	0	15166	0
38127	3	13973	1
11193	4	27018	0
38167	6	35109	1
30476	9	17646	0
38167	6	4231	1
23357	8	29939	0
38167	2	2258	1
31382	1	6183	0
38167	6	35964	1
27849	7	1401	0
38167	6	16716	1
1401	0	38144	0
38167	6	3746	1
33762	1	29991	0
38167	6	34922	1
38014	5	23357	0
38167	6	31851	1
9421	8	13058	0
38167	6	32596	1
24615	9	16910	0
37852	8	22818	1
31111	8	17615	0
37899	0	19163	1
13759	7	7252	0
37899	6	31269	1
14636	6	19133	0
37948	0	22698	1
37859	7	26188	0
37948	3	5741	1
15062	4	37591	0
37922	9	20029	1
20316	3	13058	0
37870	6	23992	1
37870	9	34281	0
38155	6	34195	1
19380	8	5626	0
38097	0	1561	1
15950	10	14381	0
38064	0	4590	1
27849	4	21975	0
38064	2	20069	1
11761	0	28083	0
38013	5	37773	1
23505	3	5626	0
38013	5	32775	1
37945	4	29939	0
38013	5	3626	1
8517	0	37945	0
38013	5	1149	1
24475	6	34116	0
38154	4	8555	1
17646	8	34281	0
37857	1	28593	1
5626	4	25244	0
37980	4	4031	1
37858	3	2924	0
37973	3	34901	1
34590	7	15419	0
38005	0	18853	1
33056	1	38035	0
37868	2	5531	1
31298	6	38132	0
38125	2	29858	1
24615	1	19163	0
38125	2	16458	1
28319	0	367	0
38035	1	4698	1
2960	1	28083	0
37923	0	23141	1
19133	9	37958	0
37923	2	20374	1
37949	3	6557	0
37923	2	24849	1
24734	10	34146	0
38186	0	11770	1
33456	10	7203	0
38003	5	10453	1
38100	0	37958	0
37927	4	36358	1
4450	9	34556	0
37916	1	2291	1
26127	1	2529	0
38011	3	14473	1
3029	0	3029	0
38136	9	21322	1
13350	5	29445	0
38136	9	20852	1
34573	5	23280	0
38148	0	13357	1
26219	9	29445	0
37968	5	7902	1
18281	5	23505	0
37968	5	6884	1
26631	9	37969	0
37876	0	24619	1
4450	4	27631	0
37876	3	20372	1
11470	4	8517	0
37876	6	21796	1
31239	5	30314	0
38150	1	7157	1
20723	7	8517	0
38062	0	28484	1
38035	5	38035	0
38124	6	5045	1
15654	1	37591	0
37918	2	10660	1
7148	10	37858	0
37918	2	37067	1
32995	10	37209	0
37918	2	2328	1
14381	2	35842	0
37918	2	13192	1
16785	3	3478	0
37918	2	4339	1
15080	10	4810	0
37918	2	32148	1
2242	7	37938	0
37918	2	12356	1
37883	8	25244	0
38065	0	33845	1
8395	2	26188	0
38138	1	27869	1
31111	5	11761	0
37998	2	21319	1
38132	9	29939	0
38021	2	28255	1
18147	3	17615	0
38073	3	1085	1
30314	7	5399	0
38044	6	13983	1
33607	6	33687	0
38044	6	24921	1
31533	5	34146	0
38044	6	7983	1
37352	9	19133	0
38044	6	8035	1
36211	9	15191	0
38044	6	27678	1
19163	8	37991	0
37957	0	12189	1
38143	7	9421	0
38176	0	27409	1
37859	4	14636	0
37947	2	2579	1
34281	2	12202	0
37991	3	4202	1
13058	3	38100	0
37978	0	2187	1
29445	2	30314	0
38059	6	21988	1
37870	4	15256	0
38102	2	30733	1
30476	10	2857	0
38169	2	35626	1
3011	2	33851	0
38169	2	11886	1
37924	3	8837	0
38169	2	33440	1
5378	7	15191	0
38169	2	29028	1
28668	5	13174	0
38169	2	12441	1
3842	2	15739	0
37938	2	11354	1
36402	2	7252	0
38170	2	16844	1
37945	1	13759	0
38040	0	1561	1
24187	4	37958	0
37878	3	7995	1
37960	1	35067	0
37990	3	20648	1
38148	9	3942	0
37867	0	37982	1
37960	7	37949	0
38106	2	25935	1
17595	1	20018	0
37859	3	28915	1
10753	9	2960	0
37859	6	16010	1
24475	7	33741	0
37859	6	33244	1
7148	9	15654	0
37859	6	13936	1
8517	1	17615	0
37859	6	17408	1
21382	9	35842	0
37859	6	24432	1
2857	1	38143	0
37859	6	27278	1
7148	10	37968	0
37859	6	16947	1
31382	3	31298	0
37859	6	33679	1
15218	1	37943	0
37859	6	19763	1
8699	9	19880	0
37859	6	273	1
24187	10	15251	0
37972	0	10406	1
14381	0	37585	0
38157	2	19241	1
37960	1	23481	0
37970	0	20273	1
31239	10	13938	0
38100	0	37750	1
35619	1	34281	0
38100	3	28741	1
8697	2	25534	0
38006	0	6101	1
8517	10	20130	0
38087	0	11511	1
37872	5	38100	0
38084	6	6020	1
26127	5	13350	0
37909	4	38013	1
15256	1	10116	0
37874	5	11888	1
31298	0	37858	0
37874	9	13934	1
10116	4	15654	0
38147	2	24663	1
37391	6	19133	0
38147	2	17122	1
2960	9	38054	0
38067	3	12095	1
36402	8	36476	0
38190	0	19701	1
3942	0	34573	0
38190	1	26197	1
23313	7	12922	0
38103	2	7875	1
34146	1	9421	0
38071	5	26153	1
26127	8	10034	0
37956	4	23063	1
3011	5	37045	0
38172	2	22766	1
31382	8	28319	0
38057	6	37037	1
8486	4	38139	0
38057	6	25026	1
14728	10	28915	0
38101	4	18898	1
34313	10	33922	0
37853	0	15388	1
37870	7	8486	0
38020	1	5453	1
9864	2	14129	0
38066	3	13706	1
12922	3	30527	0
38030	0	5148	1
37968	0	7120	0
38123	0	38080	1
38035	7	8837	0
38027	0	29874	1
13759	7	12922	0
38029	4	1465	1
37883	9	16567	0
37964	6	20194	1
37761	3	6263	0
38116	3	36268	1
1567	1	7203	0
38077	0	26658	1
26188	7	28668	0
37894	0	37991	1
31239	0	11388	0
38068	8	30784	1
8233	3	32913	0
38068	1	10466	1
27849	6	15256	0
37875	0	13357	1
31239	8	3011	0
37875	3	35395	1
6984	9	14636	0
38016	2	21044	1
7148	1	4567	0
38016	2	5410	1
37352	8	38143	0
37934	0	1980	1
37945	0	28812	0
38163	2	26831	1
32995	2	34116	0
38104	0	3248	1
38100	1	19880	0
38074	8	37898	1
25175	4	9984	0
38109	4	24840	1
14129	2	31382	0
38050	0	32609	1
2857	4	8697	0
37942	2	38106	1
27232	5	15166	0
37902	0	15388	1
30314	7	24983	0
38009	0	29841	1
37949	1	32138	0
38115	8	21486	1
31298	3	21293	0
38115	5	19500	1
15654	9	11193	0
38115	5	36456	1
27631	6	3029	0
38141	2	27045	1
33851	7	11909	0
38110	2	5780	1
32979	10	18500	0
38110	2	18767	1
28812	2	24187	0
37863	0	2151	1
1401	9	37591	0
37863	6	37756	1
2960	8	37943	0
38122	2	9387	1
21293	9	36002	0
38133	6	32278	1
21995	2	19026	0
37890	4	37890	1
29991	9	13058	0
38024	6	30836	1
14281	4	38166	0
38145	4	29480	1
49	2	4450	0
37886	0	38014	1
35738	1	14669	0
38149	0	27335	1
32394	8	31085	0
38080	2	33005	1
367	1	27532	0
38080	2	28450	1
38123	6	15256	0
37920	0	32892	1
12202	10	24734	0
38038	4	4620	1
37949	8	9984	0
38112	3	11192	1
33056	0	35905	0
37945	1	13731	1
8697	5	2960	0
38010	2	1715	1
10034	6	15166	0
38010	2	22332	1
12202	10	33221	0
38010	2	14093	1
19024	2	37958	0
38082	9	18574	1
23481	2	15166	0
38045	2	7232	1
19557	8	24615	0
38092	1	30607	1
16785	2	19557	0
38119	4	20615	1
15578	9	13892	0
38060	9	8436	1
3478	2	33056	0
38060	9	14155	1
37858	2	37968	0
38060	9	38056	1
32496	10	17615	0
37931	5	14907	1
23689	9	37945	0
37895	3	6047	1
38065	9	23313	0
37905	5	33214	1
14381	7	11909	0
37905	5	10527	1
38166	8	18106	0
38069	6	22583	1
37391	7	35905	0
38047	5	7683	1
367	1	38139	0
37849	2	33241	1
33922	9	35842	0
37992	9	3754	1
31533	5	36476	0
37992	9	23019	1
29445	7	13350	0
37987	3	18095	1
20472	3	33056	0
38164	0	25712	1
19243	0	36227	0
38156	0	30159	1
8517	0	15218	0
38184	5	24030	1
15062	10	19380	0
38089	4	35754	1
36402	3	23481	0
38089	5	21278	1
4810	6	38139	0
38043	8	22608	1
8233	8	27018	0
37854	5	12745	1
37991	4	2901	0
37997	0	13357	1
3029	8	37677	0
37951	4	22266	1
24734	4	27849	0
38079	0	13357	1
32394	5	8837	0
38063	0	24281	1
24475	1	30314	0
37952	2	22903	1
15166	4	25857	0
38143	3	23432	1
15739	3	36002	0
38051	4	35148	1
1567	0	38014	0
38051	3	32189	1
2385	9	11761	0
38051	5	32216	1
27849	10	27631	0
38051	5	8138	1
1498	1	21221	0
37848	0	6712	1
19133	10	37938	0
38161	0	9937	1
36299	6	38144	0
38012	6	30923	1
7212	3	37960	0
37862	4	26987	1
35440	3	10069	0
37907	0	33491	1
33687	6	30476	0
37926	0	2926	1
24615	8	34188	0
38117	0	14420	1
33762	2	30476	0
37965	2	7814	1
34281	2	28319	0
38036	2	1017	1
20723	3	28812	0
38036	2	14086	1
4810	4	9792	0
38046	0	22698	1
32947	8	38097	0
37962	6	1947	1
33922	4	15218	0
37893	4	28300	1
11470	9	8517	0
37893	6	18557	1
12922	9	33687	0
37869	3	10850	1
5399	9	11388	0
37869	2	19668	1
15062	9	1498	0
37869	9	3495	1
23357	5	23689	0
38134	2	32824	1
34590	8	37859	0
38037	3	11419	1
35440	5	20130	0
38159	2	22225	1
4810	1	35619	0
38159	2	11858	1
28083	5	23660	0
38166	2	16876	1
5572	0	4670	0
38090	9	3896	1
13892	4	36299	0
37896	0	5326	1
5781	7	10069	0
37966	6	7905	1
27018	7	30516	0
37860	0	3445	1
15251	1	7456	0
37860	2	26483	1
33687	8	37969	0
37860	2	17309	1
14281	3	15166	0
37860	2	33929	1
28812	8	37991	0
37865	0	22698	1
9090	8	37761	0
37861	0	28648	1
30617	6	29066	0
37861	2	14122	1
19380	9	37591	0
38091	2	32016	1
38026	8	37677	0
38094	0	37258	1
14281	7	4290	0
38188	0	22698	1
24462	8	19243	0
37986	0	19163	1
27532	8	38144	0
38001	8	2519	1
28668	5	37969	0
37929	0	2187	1
10116	8	29939	0
37929	3	8224	1
14727	3	26188	0
37912	1	15382	1
8486	7	35619	0
38017	2	4384	1
21293	9	37870	0
38017	2	21884	1
30516	10	10116	0
37898	2	2208	1
20668	10	15419	0
37898	2	26039	1
28319	1	6263	0
37898	2	19154	1
22556	1	19163	0
37898	2	2477	1
27018	5	31382	0
37898	2	38074	1
31085	4	11761	0
37898	2	22911	1
12202	10	21293	0
37898	2	30969	1
32394	4	2446	0
37898	2	6859	1
7295	10	32138	0
37898	2	25638	1
8517	7	7252	0
37898	2	20345	1
24324	7	3029	0
37898	2	34275	1
35738	8	18500	0
37898	2	26456	1
16567	5	37858	0
37898	2	6748	1
31085	9	7295	0
37898	2	15327	1
9864	9	15062	0
37898	2	12909	1
5399	0	2446	0
37898	2	34807	1
11909	7	25175	0
37898	2	6755	1
37764	6	5399	0
38144	0	22698	1
10545	10	34882	0
38053	0	123	1
33687	0	28668	0
38118	4	34485	1
31085	7	10607	0
38180	0	22698	1
27631	10	37883	0
38180	6	2438	1
2446	5	36002	0
38180	6	1640	1
11470	0	18500	0
37904	6	4301	1
35905	5	37938	0
37904	6	24797	1
31085	7	33851	0
37904	6	12930	1
37742	2	34263	0
37911	0	2392	1
17401	2	38097	0
38034	2	33093	1
9090	0	9792	0
38034	2	13204	1
6557	5	5399	0
38034	2	8017	1
35905	6	38143	0
38171	2	24634	1
11193	7	15654	0
38129	2	1472	1
38132	6	49	0
38179	2	33484	1
38014	4	6183	0
37993	6	10097	1
12202	5	35619	0
38165	3	21165	1
24983	9	5399	0
38189	4	2297	1
37045	9	37991	0
38173	0	27931	1
4670	2	38166	0
37994	5	21098	1
27631	6	33456	0
37996	8	16990	1
37969	1	38100	0
38187	3	26038	1
14636	7	33149	0
38142	2	34835	1
31111	4	35842	0
37882	1	35623	1
17401	6	13350	0
37928	4	30974	1
4670	5	37949	0
37928	2	18222	1
5626	0	18711	0
37928	2	17742	1
33607	4	29445	0
37928	5	8830	1
2901	4	28241	0
37928	5	24251	1
8486	1	38144	0
38185	3	7258	1
3029	3	34281	0
37871	6	27466	1
37991	6	29066	0
38151	6	15006	1
19243	6	33687	0
38108	0	32609	1
8395	8	28066	0
38108	2	25292	1
28241	3	38054	0
37932	3	23411	1
28066	3	20723	0
38083	0	9008	1
14727	5	34188	0
37949	4	15405	1
35905	1	19163	0
37921	0	32712	1
32913	10	38132	0
37976	0	9628	1
37045	8	37391	0
38088	0	31457	1
31533	3	35619	0
37897	1	29163	1
17595	1	5378	0
37981	0	14344	1
16186	2	15654	0
37967	8	36837	1
24615	4	3135	0
38099	2	16953	1
32979	4	8395	0
37950	0	20176	1
11388	9	33687	0
37906	0	20273	1
13058	5	20071	0
37906	6	34628	1
37391	10	16910	0
37906	6	10305	1
16344	1	32394	0
38162	6	37932	1
11909	4	2385	0
38191	0	27045	1
3135	9	8699	0
38022	2	21814	1
23505	5	18711	0
37924	2	37924	1
6183	7	23481	0
37908	0	14235	1
32394	3	3011	0
37999	0	15592	1
27631	1	21293	0
38085	4	7255	1
15578	8	32913	0
37935	6	7963	1
25857	9	8517	0
37935	6	32597	1
1627	0	12922	0
38031	0	9984	1
3135	8	13350	0
38153	2	28717	1
37742	4	15419	0
37979	2	17362	1
22556	3	25534	0
37971	0	25626	1
7148	5	34281	0
37971	2	12071	1
33056	8	34313	0
38183	6	21524	1
5572	5	16344	0
37954	2	13048	1
30836	0	33741	0
37954	2	12441	1
23280	6	10034	0
37954	2	37255	1
37883	3	38123	0
37954	2	30831	1
37969	0	4068	0
37954	5	19278	1
10545	5	20018	0
37954	2	17507	1
31085	4	11466	0
38132	0	20509	1
18711	0	15256	0
37872	2	10883	1
34146	3	32947	0
37872	2	2027	1
35905	3	37391	0
38015	0	15388	1
11470	3	20723	0
38152	6	29584	1
33687	1	16752	0
38152	6	27365	1
28319	9	10545	0
38152	6	22657	1
37960	4	18147	0
38152	6	36026	1
37591	7	31382	0
38178	5	12562	1
8837	2	25857	0
37900	6	13165	1
24734	0	38132	0
38048	4	8231	1
36002	10	26127	0
37941	6	14107	1
6183	7	38132	0
37846	0	20470	1
14636	9	20339	0
38140	3	32367	1
2529	3	5399	0
38026	4	1468	1
13350	7	33762	0
37873	4	16910	1
19243	9	15218	0
37877	0	9993	1
11466	2	33922	0
38014	0	19816	1
24615	1	8697	0
38025	2	20055	1
23357	10	14263	0
38025	2	30254	1
2960	2	2960	0
38025	2	7663	1
2924	1	37858	0
38025	2	38177	1
2446	2	37209	0
38025	2	34425	1
7212	10	34313	0
38025	2	25392	1
1567	9	30516	0
38025	2	38004	1
16752	7	37969	0
38025	2	3740	1
7456	5	14727	0
38025	2	37164	1
7252	1	38014	0
38025	2	10973	1
1567	3	36299	0
38028	0	15816	1
38166	3	32496	0
38098	2	1554	1
32496	1	15739	0
37879	3	16844	1
11761	4	31239	0
38182	9	3424	1
28291	5	24475	0
38182	9	17171	1
4068	6	15251	0
37892	5	2797	1
38123	4	23481	0
38135	2	25405	1
2901	0	38100	0
38139	2	1822	1
32995	5	8818	0
38139	2	19813	1
37938	1	17401	0
38139	2	18699	1
20723	7	30527	0
37988	0	25538	1
30476	10	19163	0
37975	8	261	1
33149	1	15419	0
37963	3	1568	1
26127	5	26219	0
38093	0	20273	1
28812	8	24187	0
37864	2	15740	1
31941	0	9984	0
38007	2	15289	1
16785	7	33149	0
38158	2	10773	1
7212	10	31239	0
38070	3	24656	1
1627	0	28066	0
38061	6	19800	1
3942	5	37949	0
37953	2	33009	1
33851	0	33687	0
37953	2	2514	1
37761	6	34146	0
38126	0	33845	1
2529	4	29991	0
38175	2	5849	1
38035	3	2446	0
38175	2	30033	1
31941	6	36227	0
37983	8	33946	1
10074	7	32756	0
37983	5	5183	1
38123	3	38144	0
38121	0	24741	1
23481	1	1498	0
37989	0	10406	1
37924	9	32995	0
37989	3	9192	1
14129	6	33221	0
38000	6	12862	1
14669	5	13058	0
38000	6	27384	1
34614	1	37677	0
38078	0	2151	1
11388	6	32394	0
38078	3	31826	1
11466	9	26219	0
37974	2	10437	1
32138	1	24475	0
37961	4	38013	1
7212	9	37960	0
37961	5	19722	1
27532	1	38139	0
37961	5	29057	1
26631	5	3135	0
38075	4	17185	1
35842	2	37960	0
38146	5	608	1
27631	10	17595	0
38049	4	33628	1
37945	10	37391	0
38049	5	14890	1
30617	0	16785	0
37959	5	38118	1
29445	4	4670	0
38054	2	29655	1
33687	4	24615	0
37845	2	34973	1
24983	6	14728	0
37958	2	30065	1
37958	1	4068	0
38086	0	31051	1
2960	8	33607	0
38052	0	12973	1
37045	5	8517	0
37955	3	38162	1
26219	6	35067	0
37955	10	28170	1
37677	4	19026	0
37955	5	27248	1
17595	8	7120	0
38008	0	33272	1
15166	3	23280	0
38168	0	15388	1
37924	2	33922	0
38105	4	17165	1
25857	9	10034	0
38096	4	5937	1
3478	3	30617	0
37914	0	23298	1
13350	10	14636	0
37851	5	15798	1
16332	1	7252	0
37933	3	3792	1
25534	7	34263	0
37995	5	1788	1
14381	5	38148	0
37881	3	38167	1
38139	5	23481	0
37936	2	5834	1
10753	1	7295	0
38128	8	14399	1
8395	0	35905	0
38023	2	26195	1
15950	10	20625	0
38002	0	15210	1
11761	7	2446	0
37883	0	24619	1
9090	2	36476	0
37913	3	6752	1
2529	7	3842	0
38181	0	24539	1
20625	3	31941	0
38113	3	13772	1
36435	5	37968	0
38019	0	25653	1
2901	2	38054	0
37844	0	24989	1
29991	3	34263	0
37884	4	21817	1
19557	0	18500	0
37884	5	7140	1
1567	9	13892	0
38177	6	20845	1
20339	4	12922	0
37850	1	17448	1
20472	2	37742	0
37915	0	22852	1
25534	2	20130	0
37915	5	20617	1
38148	10	22570	0
37939	0	17023	1
31382	5	19026	0
37880	0	25857	1
2960	6	8517	0
38081	0	37613	1
37045	9	37949	0
37982	0	8502	1
33922	10	37209	0
37919	3	32104	1
9090	6	36299	0
38033	2	18457	1
2385	7	23280	0
37944	8	16427	1
37585	6	25175	0
37944	5	34334	1
1567	6	34882	0
38130	2	18424	1
15062	0	32913	0
38130	2	11166	1
28241	1	14669	0
37903	2	20004	1
29445	8	29991	0
37903	2	13047	1
20668	9	32979	0
37856	0	35284	1
17646	10	15578	0
38072	3	2376	1
34313	6	26127	0
37937	2	18261	1
8486	3	15256	0
37889	2	16461	1
13058	3	38143	0
38004	3	8158	1
15256	7	16186	0
38076	1	21440	1
34573	9	5399	0
37969	2	10166	1
31239	9	2385	0
37969	2	8241	1
7295	7	33607	0
37946	0	10406	1
16910	0	6984	0
37858	3	23108	1
19243	0	18147	0
37858	6	37870	1
28083	9	8818	0
37858	6	32241	1
32496	0	32138	0
37858	6	17493	1
24615	6	28066	0
37977	0	4787	1
37872	8	37945	0
38131	0	9187	1
35738	0	30617	0
37866	0	10183	1
27232	1	37943	0
38137	2	15723	1
2857	2	28812	0
38055	0	20273	1
30476	7	37045	0
37917	3	3413	1
24187	1	34188	0
38107	3	25678	1
28668	2	20130	0
37855	5	865	1
37870	6	16186	0
37855	5	9612	1
4810	3	4567	0
37891	0	2151	1
11794	2	15062	0
37925	2	35000	1
33741	7	34313	0
38111	0	27044	1
16752	4	34590	0
37847	2	22910	1
9984	1	32394	0
38018	8	21486	1
19024	7	34263	0
38018	5	36456	1
23481	6	18711	0
38018	5	31693	1
27018	9	37968	0
37943	2	35540	1
14113	10	37938	0
37960	5	23129	1
1627	8	1627	0
37960	5	37185	1
8395	8	13759	0
38160	0	29587	1
31941	1	32496	0
37984	2	16303	1
5399	4	19243	0
37901	3	3051	1
33056	3	19024	0
37985	5	5181	1
7252	2	37883	0
38174	3	24460	1
15739	8	29903	0
38032	6	22918	1
4068	10	9421	0
