# Supplementary material
Source: ML conference proceedings conference paper supplement (https://proceedings.neurips.cc/paper_files/paper/2021/hash/0fd600c953cde8121262e322ef09f70e-Abstract.html)
Supplement: Supplementary file 1 [file 0fd600c953cde8121262e322ef09f70e-Supplemental.zip › Supplementary_Material_Paper_8745/data/Hamaguchi-BM_head-1000/train/train.txt]

28462	0	12640
28462	1	1659
26624	0	9863
26624	2	36865
4631	0	19190
4631	2	27382
33937	0	12989
30831	4	13798
30831	5	7927
14221	0	6517
37428	0	16996
37428	3	9141
32702	0	30405
32702	2	17972
32702	2	36950
32702	2	30083
32702	2	20178
32702	2	5798
11884	3	14981
11884	6	29238
6563	0	1499
6563	3	18500
19238	0	6999
19238	3	29188
1730	7	35208
29684	0	11829
29684	3	11487
29684	5	5855
12088	4	3518
12088	4	33242
12088	4	18872
12088	2	2509
6913	8	1822
6913	4	2777
3603	0	27221
3603	2	6341
3603	2	2735
3603	2	12311
3603	2	18240
3603	5	29145
3603	2	17204
3603	2	14979
3603	5	16701
3603	2	36373
3603	2	24871
3603	2	2184
3603	2	26530
3603	2	903
25891	0	270
25891	2	25357
10945	4	35643
10945	5	15196
12700	0	5390
12700	2	33775
21660	0	37170
850	0	35284
850	3	27693
36887	8	25215
36887	4	25188
24092	0	22010
24092	3	9873
25647	0	37750
25647	3	6739
34672	0	30441
34672	3	33932
17518	0	28839
17518	6	31222
34329	0	3269
34329	2	6721
10975	3	36952
10975	6	23086
11826	0	21266
11826	2	12950
30533	0	15388
30533	3	3065
30533	6	32939
16011	0	3625
16011	4	33136
33582	0	963
33582	2	28992
24861	0	5782
31942	0	15128
31942	4	5847
6707	0	36545
34210	0	2757
34210	4	11888
12852	8	15538
12852	4	32215
26241	3	16316
26241	5	28974
4414	0	4484
4414	2	23567
17396	0	3914
17396	2	2375
3567	2	34473
3567	2	22850
3567	2	28243
3567	2	18973
3567	2	2105
3567	2	11863
3567	2	18936
3567	2	29708
3567	2	24389
3567	2	6112
3567	2	16994
3567	2	491
3567	2	6853
3567	2	4404
3567	2	15906
3567	2	26509
3567	2	11916
29465	0	5463
29465	3	24978
18203	0	34262
18203	3	23817
18203	6	15700
18203	6	31752
1657	7	13437
15450	0	15416
15450	3	4779
1373	0	37437
1373	3	29906
1373	6	27946
33364	0	2708
33364	1	24339
22671	2	29492
33237	0	19547
33237	3	12847
4334	2	23085
4334	2	14703
4334	2	2936
7650	0	7906
7650	2	765
11498	0	35284
11498	3	34386
33229	2	6708
33229	2	24793
33229	2	33304
30124	0	5456
30124	2	13974
30124	2	36876
30124	2	25158
30124	2	1163
5821	2	1492
19816	0	32017
19816	3	37838
19816	2	8399
19816	2	2034
19816	2	9039
19816	5	3538
8929	0	14449
8929	3	31275
8929	6	25970
32735	0	28332
32735	5	21029
4002	0	25492
4002	1	24010
28053	0	10193
28053	1	26602
11222	3	12362
14308	0	9982
14308	3	29582
2605	1	35120
24957	8	2423
24957	4	6390
24085	3	28929
24085	2	24436
24085	2	26119
24085	2	12017
8285	0	23206
8285	3	9585
26989	0	1643
26989	4	10190
23547	0	18833
2837	2	12528
2837	2	20035
2837	2	25527
2837	2	21032
2837	2	19363
30331	0	2697
30331	1	24339
4070	0	15388
8690	0	12520
8690	2	5081
33574	0	2187
32202	0	19105
10684	2	22762
3624	0	27805
3624	3	10157
3939	0	16520
3939	2	27374
3939	2	23511
1130	5	14278
1130	5	25939
1130	5	1209
1130	5	1780
1130	5	10433
18661	0	22372
28704	0	362
28704	5	3883
28704	2	37168
6034	0	11511
6034	3	28820
25504	0	2187
25504	3	2947
18051	0	33514
31962	8	18699
31962	4	5369
31962	4	24783
31962	5	22581
15785	0	29147
15785	3	27834
35542	0	13248
35542	0	1572
8339	0	9686
24561	0	19904
33543	0	31614
33543	1	2651
9961	0	35183
9961	2	28656
9961	2	6854
9961	5	14137
9961	2	21445
9961	2	6188
2367	0	3541
2367	0	29265
16582	7	25045
16582	7	12164
30814	0	11227
30814	4	21061
30814	2	23749
30814	2	22004
30814	2	4975
30814	2	1442
22984	0	33215
22984	1	6804
27353	0	13067
14193	0	21161
14193	3	17676
14193	2	15240
14193	2	20184
26499	8	25085
26499	4	12784
1009	0	24115
1009	2	2366
1009	2	29241
31557	0	33910
19516	0	29569
19516	2	10741
19516	2	5857
19516	2	27919
19516	2	24063
33279	8	1822
33279	4	3664
2113	0	3795
2113	5	28983
1735	0	31720
1735	4	33073
37708	0	14667
37708	2	13700
37708	2	9235
17997	0	9229
17997	1	2291
37371	0	36814
37371	3	15799
35836	0	23550
16535	0	35440
16535	3	8987
12803	0	17680
12803	2	12342
2492	0	15388
2492	6	31100
15723	2	11946
4834	0	23206
4834	3	30977
36328	0	14305
36328	2	34756
9582	0	26542
19593	2	23666
19593	2	26426
6931	8	30784
20350	0	5194
22014	0	37765
22014	3	4143
21247	0	24281
11459	0	2151
11459	3	10694
4086	0	22698
4086	3	21940
19926	2	30922
27673	0	22642
27673	6	36192
27673	9	15219
33920	0	23206
33920	3	17852
35938	0	22387
35938	1	11811
1749	0	12004
1749	3	7298
11153	2	31859
11153	2	8551
11153	2	33898
11153	2	28221
11153	5	2797
11153	2	2748
11153	2	16985
11153	5	34897
11153	5	35088
11153	2	9994
8871	2	25630
8871	6	37678
8871	6	33001
12614	0	35840
12614	2	21704
24492	0	6454
24492	1	2651
26894	3	4173
33809	0	35978
16402	0	23876
17456	0	1680
17456	2	35730
17456	2	4201
36797	6	35445
27081	5	13680
28100	2	5042
3779	0	3900
3779	2	4322
37074	2	23580
19284	0	17526
19284	5	21116
34871	0	25857
34871	6	15915
18953	0	11309
14828	0	25857
14828	6	14316
37465	0	23355
37465	2	11315
15333	0	1646
126	3	11192
126	6	34336
27739	0	28105
27739	3	18577
29717	8	15842
29717	4	24484
2674	0	6576
2674	2	15357
2674	2	29884
23822	7	1237
23822	1	22883
21338	0	3139
12583	0	13357
12583	3	21535
11075	1	12032
30067	0	22710
7831	2	35591
29470	0	26353
29470	2	26393
36764	0	29207
36764	4	20546
21187	8	8514
21187	4	27248
17725	0	4277
16740	0	32134
27040	8	8514
27040	4	5642
16744	7	9850
37447	0	8007
16531	0	6633
16531	2	32920
19357	0	27003
19357	4	28013
19357	2	2587
2032	8	25215
2032	4	11013
6605	2	13062
37709	0	28839
37709	6	23969
37709	6	19014
37709	6	35266
20556	0	32091
20556	3	34677
30083	8	32702
30083	8	31873
31555	0	18853
31555	6	18665
29803	8	30784
29803	1	10466
33240	0	16280
17967	0	11922
17967	2	4373
37825	8	14025
11116	5	17177
24159	0	2406
24159	5	13831
12500	2	26139
12500	2	29127
17390	0	22684
14501	0	22229
14501	4	23475
37490	0	698
8023	0	33728
8023	2	34945
6898	0	24019
7924	0	28480
5633	0	4054
26529	0	25538
26529	3	31691
15377	2	19437
15377	2	29586
9691	0	37211
9691	5	12676
9691	2	22446
9691	2	28404
9691	2	19110
9691	2	15841
9691	2	30809
9691	2	13297
9691	2	1660
9691	2	8480
9691	2	10006
8748	0	16937
19835	0	1997
19835	3	15020
27796	0	10075
8629	0	37437
8629	3	26498
8629	6	24357
8629	6	33812
8629	6	30964
8629	6	20072
8629	6	419
8629	6	788
8629	6	3550
8629	6	36989
8629	6	18601
8629	6	12734
8629	6	36877
8629	6	13249
8629	6	10430
30495	0	5119
30495	0	24457
30495	2	19565
30495	2	29698
31626	3	25837
30731	0	15325
17634	0	2757
17634	2	31118
7241	0	25971
7241	4	23731
7241	4	25748
17859	0	1323
17859	3	14701
34845	0	9017
34845	2	19376
24285	0	1561
24285	4	22761
3568	0	14413
3568	2	16024
29072	0	35284
29072	2	28576
3407	0	2998
17821	0	31955
17821	2	29178
24062	1	2283
18913	0	7759
2413	3	3413
2413	6	35598
2880	2	15917
2880	2	4265
26243	0	16751
26243	3	32148
7217	7	30997
23224	0	9269
269	0	26412
269	2	36346
269	5	7586
269	2	956
4836	0	25655
4836	1	21952
24277	8	34040
24277	8	14025
8401	0	17491
8401	2	25989
18126	6	37700
18126	6	21825
2017	0	28450
2017	0	22556
9219	2	13783
14691	4	14691
14691	5	30138
23747	0	25680
17458	0	23206
28809	3	31596
28809	6	17639
28809	6	6042
28809	6	37669
28809	6	19574
28809	6	6583
28809	6	27433
28809	6	33534
28809	6	16496
28809	6	19265
28809	6	3055
28110	0	23875
12474	0	6359
12474	2	26487
12474	2	16448
12474	2	29740
12474	2	9057
18756	0	19163
18756	3	6137
34231	7	12164
16160	6	21755
4302	0	27869
4302	2	13427
20860	0	11511
20860	6	17318
8428	0	7924
8428	1	27708
8397	0	21356
8397	4	3518
8397	4	6101
18171	0	33188
18624	0	834
18624	3	11197
6744	0	13357
6744	3	17921
3212	0	27735
11479	2	16743
26476	0	5122
26476	2	8763
34879	0	16446
34879	2	15841
34879	2	28777
13507	8	31842
13507	3	4722
22309	0	314
22309	1	28593
16112	2	10007
19544	0	13283
19544	3	36040
1305	0	27162
37016	0	25857
37016	3	4067
37059	0	9619
37059	3	12643
37059	6	17104
3042	0	27677
4075	4	20687
4075	3	21419
20450	2	4774
20450	2	15952
20450	2	5147
20450	2	35315
36927	2	32622
36927	2	31252
36927	2	20642
6830	0	26861
31168	3	8166
21175	0	17890
32516	0	5108
32516	1	5453
28383	8	1949
28383	8	27200
6036	0	3896
6036	4	15003
5939	0	17622
5939	3	14950
12224	0	25764
12224	2	19673
35039	0	2683
35039	2	6660
32385	0	3776
30064	0	21893
30064	3	17931
35898	0	36916
25281	0	6454
25281	1	2651
4082	0	24869
21185	0	11740
21185	3	4966
37595	0	7311
37595	1	13646
6716	0	2584
6716	2	21015
6716	2	32469
23833	8	9054
23833	8	36303
2105	0	3567
2105	2	30685
10152	0	10948
26090	0	24491
26090	2	31582
7457	0	37826
14234	0	30121
27844	0	34108
11196	0	17863
11196	3	5069
31933	0	29077
31933	2	31565
31933	2	20984
11283	0	2336
3748	8	15538
3748	4	22774
3748	10	37713
36157	0	4408
10400	0	22327
19365	0	29654
19365	2	31208
19365	2	28219
4561	3	9856
29959	2	13422
29959	2	29540
15659	3	4869
9132	3	19092
28312	0	277
28312	2	35000
28312	2	34417
3286	0	5022
3286	2	14887
3041	3	9009
14169	2	16852
892	0	33910
892	4	18128
892	5	6687
892	5	36598
892	5	18779
892	5	35184
892	5	22725
892	5	11558
24711	0	28639
24711	2	24499
24711	2	7273
24711	2	24960
8639	0	1151
1447	0	33246
1447	3	33767
1587	0	36586
1587	3	27541
9924	0	11001
9924	4	892
25366	0	1
25366	3	21368
33076	0	4884
34454	0	31341
29386	0	34262
29386	3	23817
29386	6	1250
7667	8	25215
7667	4	34529
511	0	9321
102	0	2151
102	3	13627
102	6	2854
29540	0	35560
31331	0	14458
31331	4	20748
31331	2	23426
31331	6	29624
1898	0	13357
1898	3	11229
28959	0	32712
28959	2	6416
28959	2	22998
23014	0	30754
23014	3	27359
1953	0	760
28386	3	17205
28791	8	30784
28791	1	10466
8823	0	9138
8823	2	26086
8823	2	7303
19041	0	19466
19041	2	18753
31000	7	12793
31000	1	29163
34105	0	9244
34105	6	12017
25355	0	11318
6889	0	9984
6889	3	5279
4735	0	37222
4735	1	17448
8586	8	16540
3920	0	11206
3920	3	22530
35396	8	30784
4593	0	8421
4593	2	29458
28821	8	8514
28821	4	8293
33797	0	2770
33797	1	17448
21040	0	37460
21040	3	10743
23458	3	22062
1213	0	36761
1213	5	31008
16325	0	37280
4204	2	5424
35790	0	37170
35790	4	30683
2969	8	29096
9643	8	34347
7150	8	14025
18362	0	27672
16273	0	27934
16273	3	13410
819	7	29575
2911	0	18961
2911	2	4642
29609	0	19813
29609	4	22153
23392	4	23392
32428	0	20785
32428	4	28927
28740	0	29654
12650	0	2891
35567	0	28198
1986	0	22191
1986	2	36908
1986	2	20203
1986	2	6696
1986	2	23036
1986	2	17220
34757	0	17434
34757	3	1589
35330	0	11319
35330	4	21900
35221	0	16936
35221	2	10334
10750	0	23190
10750	2	20681
16169	8	12178
16169	0	22090
16169	6	14555
3249	6	34528
18673	3	11260
18673	5	18673
2572	0	34657
2572	3	12257
33528	2	9954
33528	2	14766
33528	2	6423
33528	2	13134
30888	8	30784
29517	0	28864
29517	4	13181
22690	8	28016
19568	3	19474
1100	0	14155
1100	5	5973
7300	0	30520
16766	0	9911
16766	2	31722
14499	0	32259
7731	0	22240
7731	2	34467
15029	0	18972
15291	0	4422
15291	3	14894
26934	0	12219
26934	1	2651
31179	1	18592
238	0	31521
23954	0	35440
23954	3	17408
18908	0	13035
18908	4	36883
35213	0	35440
19467	2	10734
10635	0	27513
10635	1	17448
26178	0	36349
22262	0	30190
22262	0	14066
30627	8	2068
30627	5	36819
30627	5	8838
30627	5	36995
30627	6	5919
18500	3	3395
18500	6	30384
18500	6	6563
18500	6	26460
579	0	20324
579	3	21329
31872	2	27507
15616	3	4908
28461	7	1225
17173	8	14520
26752	0	11511
26752	3	13990
26752	6	29520
34824	0	26411
25387	0	18922
15206	8	14975
11261	3	709
19118	0	35202
3590	0	20470
19407	0	32017
19407	2	19667
19407	2	2933
19407	2	24275
19407	2	15083
25760	0	8642
25760	2	8265
6160	0	30257
6160	2	30257
36223	0	5734
36223	2	33143
36223	2	22623
26918	0	27826
26918	3	29275
37452	7	36541
23146	0	28839
23146	6	25766
22763	0	5714
22763	2	30450
27472	0	4390
27472	2	23342
17345	0	8320
17345	1	17448
17345	2	16653
31356	0	19923
31356	5	24496
931	0	19218
794	0	25479
37461	7	5651
24637	4	35071
7852	8	1822
7852	5	21881
29260	4	37701
5306	8	858
5306	3	4629
31344	0	23206
31344	3	21135
11149	0	6856
11149	1	27869
11149	2	17762
26810	0	1807
26810	2	1535
10785	0	20182
10785	1	28886
14431	0	25706
30253	0	25885
30253	2	32344
30253	2	36286
30253	2	18696
30253	2	9736
30253	2	15431
30253	2	22673
30253	2	9822
30253	2	16747
22683	0	16208
35427	0	22241
35427	3	11934
35427	5	35427
36634	8	24681
36634	1	18592
19979	0	23275
19979	3	5669
5556	2	11283
4426	0	15547
4426	3	27079
36829	0	16087
36829	3	17221
35660	0	25920
35660	2	13350
19214	1	8893
24451	0	33962
24451	2	34536
24451	2	30052
27462	0	28907
27462	5	34269
30955	0	25615
30955	2	27483
13806	0	27461
30581	0	19682
3276	7	37659
15398	0	7359
2855	0	27252
4282	8	31137
4282	3	24672
4282	10	32445
4282	5	21509
4282	6	703
8581	0	9138
8581	9	21059
17601	0	18714
17601	1	4723
13266	0	4511
13266	2	12188
13266	2	33602
7965	0	28924
7965	4	6642
29410	4	1567
29410	5	19461
29878	0	15047
29878	2	17938
28747	0	9982
28747	3	12584
8728	0	834
8728	3	20171
34735	0	2494
34735	1	24339
34735	2	35706
34735	2	2035
14782	2	31159
14782	2	22850
14782	2	21997
14782	2	18536
14782	2	16720
14782	2	16342
1000	0	24888
1000	3	12756
29122	0	7303
6220	0	9892
6220	2	13979
6668	0	23553
6668	4	15582
11204	0	33272
11204	4	30228
9922	0	20661
25826	0	28324
25826	5	25826
14913	2	4047
14913	2	11333
9987	0	1715
679	0	19107
26232	0	8575
31946	2	7660
31946	2	12947
31946	2	25693
31946	2	12013
24748	0	19569
35958	0	20991
35958	6	9200
17153	0	21949
17153	2	13935
23385	0	5395
9343	8	8514
9343	4	4031
9343	4	18650
21007	0	1751
26300	0	37063
25922	0	28657
25922	1	2651
25922	1	6400
11668	0	19163
11668	3	8755
33960	0	2187
33960	3	18075
33960	6	34245
33960	6	23306
29704	7	22128
29704	7	35864
10211	0	16547
27057	0	9614
27057	2	3843
27057	2	32158
27057	2	6766
29535	7	17497
29421	0	15210
29421	6	10078
22278	0	34866
16561	0	4935
16561	3	32044
24088	0	28572
24088	3	26603
31552	0	2495
31552	5	15375
31552	5	6427
31552	5	15410
25924	0	29397
25924	2	5064
3557	0	12271
3557	2	31837
22099	0	27411
14969	8	31108
14969	4	15944
34515	0	32803
34515	3	13706
186	6	31209
5385	0	37048
18040	0	4513
8327	0	16494
17797	0	5869
17797	1	1439
6933	3	19685
6933	6	11232
6933	6	9393
6933	6	24112
14459	5	20078
5620	0	18251
5620	3	4727
5620	5	21956
2725	0	37503
2725	3	5753
19166	0	8531
11270	0	1317
31102	8	2314
31102	8	2313
32354	0	28921
32354	3	27458
3386	0	18420
35265	0	20143
23932	0	21085
35102	0	26862
35102	2	21070
33888	0	22294
5003	2	9503
5003	2	34491
5811	0	4706
5811	1	9104
1638	2	32905
22563	0	33845
22563	6	946
25852	0	12171
25852	2	25767
37113	0	32713
37113	2	16979
5644	0	12296
5644	2	34629
6313	7	11871
11354	2	11173
11354	2	1646
11354	2	28344
11354	2	3691
28914	2	37798
1589	0	14374
1589	3	8035
1589	6	10589
1589	6	15928
1589	6	4223
1589	6	34757
1589	6	30968
1589	6	10269
2417	0	14773
2417	1	23996
2417	2	33716
34177	0	32712
34177	3	27192
34177	2	10895
34177	2	17537
34177	2	35350
3858	0	5797
4979	0	18047
37355	0	13139
37355	1	21207
10366	3	8158
11209	8	1650
11209	4	4895
17315	0	33394
30830	0	23975
8090	0	20273
8090	3	23261
8090	6	13389
8090	6	25033
8090	6	11943
6782	0	35840
34766	0	35284
34766	3	24845
34766	2	31945
34627	0	22698
34627	3	31814
34627	6	37645
34627	6	11502
34627	6	20796
292	0	32712
292	2	29422
15027	0	4277
15027	3	15633
15027	5	34412
35010	0	20230
35010	4	28634
23963	0	8106
23963	3	21668
19779	0	15210
19779	3	7809
19779	6	27627
19843	0	35284
19843	3	28957
9737	0	36888
24180	0	3797
36934	0	20470
32559	0	9095
32559	0	7460
19905	0	14994
29816	4	10303
29816	5	3644
1648	9	23805
1648	9	666
1648	9	22326
1648	9	5636
1648	5	35473
1648	9	29660
1648	9	37582
1648	9	11832
1648	9	25572
1648	9	20929
1648	9	34051
1648	9	33042
1648	9	1853
1648	9	21136
1648	9	4308
2393	0	28688
2393	3	29750
5666	0	12004
5666	3	33870
25800	4	22976
25800	5	32940
25800	5	30488
25800	5	17775
14692	0	7924
9546	0	9269
9546	4	31219
4613	0	10038
4613	3	8872
25481	3	14529
25481	6	9087
25481	6	7511
30041	8	15538
30041	4	4895
10213	0	23355
16489	0	10406
16489	3	19350
12023	2	15864
12023	2	11589
20092	0	31038
20092	5	35726
24058	0	11250
24058	3	32131
2437	0	7383
2437	3	4930
17121	0	19163
17121	3	31799
29066	2	11440
17149	2	31982
17149	2	3813
26308	8	30784
26308	1	10466
2859	3	2715
2859	5	3508
14059	0	26435
14059	3	25390
14806	3	23021
14806	6	5931
35255	7	18456
33579	0	10406
33579	6	23838
33579	6	27293
33579	6	27833
33579	6	3534
17441	8	1822
17441	4	24783
28609	0	16342
28609	2	15173
5224	0	23206
5224	3	36947
25014	0	9619
25014	6	31448
25014	6	37384
25014	6	17826
25014	6	35224
25014	6	17675
32769	0	8595
32769	2	27698
17117	0	1820
19364	0	19714
19364	2	23520
19364	2	21666
19364	2	822
20627	0	13357
20627	4	11579
8645	8	32941
8645	3	28258
34786	0	11089
34786	3	30558
29838	8	8514
29838	8	9440
33549	0	24124
33549	0	37556
2266	0	16699
2266	2	26208
2261	0	17429
2261	4	3518
2261	5	3844
32814	3	10997
15752	5	11200
12667	2	14276
12667	2	15198
21284	0	13357
21284	3	24955
16046	0	9939
16046	2	36963
16046	2	1153
9268	0	132
9268	3	26231
10354	0	21727
17694	0	10105
34658	8	27871
34658	8	31334
1234	0	21351
26337	8	1822
26337	4	23849
34670	3	17366
34670	6	23299
10579	0	23206
10579	3	6475
6074	3	32087
22137	0	24491
22137	2	36739
1666	0	11334
1666	2	30866
20365	0	7670
20365	4	11443
15873	0	13865
15873	3	27126
27859	0	24939
22926	0	7959
22926	2	26475
22926	2	30822
4326	0	29606
4326	4	27569
4326	4	19796
4326	4	35071
4326	4	31219
4326	5	4696
4326	5	6534
26001	0	35241
26001	3	232
943	0	1505
943	2	6331
36166	0	27753
36166	2	10123
33669	0	4610
33669	0	6
20279	0	34976
20279	2	36221
20279	2	32424
6660	0	35039
7298	8	14399
7298	4	35148
7298	6	1749
14295	0	16823
26280	0	2875
26280	3	35629
27473	0	2926
27473	3	1085
27473	5	19689
27473	2	28513
18477	2	7689
6436	0	3528
6436	2	12919
6436	2	26270
6436	2	36779
6436	2	14779
6436	2	12827
6436	2	9226
4366	0	3001
4366	5	4230
22860	0	29676
22860	3	7753
15030	0	8635
27817	0	18434
27817	2	31615
36536	0	12619
8359	0	4194
8359	2	27220
5461	0	13357
5461	3	31912
22775	7	22872
26224	0	23206
19772	0	33281
19772	2	10301
27279	3	37698
27279	2	34740
27279	2	6711
27279	2	20717
27279	2	10131
27279	2	32587
32347	0	26266
32347	2	567
18485	0	12570
24726	0	35261
24726	2	28680
28991	0	26411
28991	3	22540
17674	0	17613
17674	4	17674
12330	2	29948
12330	2	10019
18279	8	18466
20173	0	37615
20173	3	22208
20173	2	34737
20173	2	8721
1418	0	25857
1418	3	18903
19463	0	11881
19463	4	15582
200	9	11111
200	2	20720
200	2	17448
200	9	34615
200	9	36872
19450	8	21774
19450	4	31043
12594	0	33340
12594	2	34340
12594	2	7896
25593	0	37129
25593	5	24535
7528	3	10743
19369	0	12478
19369	2	29736
23222	0	32943
23222	0	27128
23132	0	25317
23132	2	24477
23132	2	10516
14674	0	13634
14674	2	18127
114	0	19205
114	1	2283
11265	0	13357
11265	3	8623
31619	0	25117
17181	0	8495
17181	2	1038
13003	0	21815
9854	0	32138
27342	0	14163
16557	0	19079
16557	1	22960
14778	7	28059
14778	7	17849
10578	0	36064
10578	3	14761
21477	2	27012
21477	2	21709
5025	2	12967
5025	2	30141
5025	2	1092
34365	0	4925
34365	3	18117
15964	0	2427
15964	3	11279
30969	5	33881
37682	1	27708
1503	2	3292
1503	2	9270
1503	2	37120
1503	2	1563
1503	2	6242
1503	2	29665
1503	2	28050
33823	0	33714
33823	0	22629
26385	0	27485
26385	3	13300
15983	0	7670
15582	0	33092
15582	5	6668
15582	5	19463
33468	0	34044
33468	1	5804
21121	0	37774
21121	2	7870
16956	0	26236
16956	3	28145
221	0	27633
21478	0	16961
21478	1	20289
21478	2	23320
21478	2	14213
21478	2	33958
34193	8	3040
34193	8	25118
19942	0	7477
19942	2	14777
19942	2	16216
19942	2	25981
25369	8	8514
25369	4	4510
13941	7	10375
13941	7	27718
6793	0	35284
6793	3	25808
32457	0	26607
33740	0	12358
29762	0	2427
29762	3	33083
15999	0	389
15999	3	12861
14500	0	11404
14500	3	33345
13454	0	12001
13454	3	31799
13454	5	3926
28964	0	25341
28964	5	5997
28964	5	31492
28964	5	33458
28964	5	28339
28964	2	29321
6725	0	95
33850	0	36814
33850	3	36258
33850	5	32283
21019	8	13769
21019	8	22818
17476	0	23507
17476	4	13662
35697	0	15388
35697	3	16998
35697	6	37041
565	0	35574
565	2	28986
565	2	29036
32742	0	10334
32742	4	4919
35485	0	25169
35485	5	24541
18877	0	36207
18877	3	20993
19464	0	30732
19464	1	31940
17820	0	19163
17820	6	16275
34117	0	13601
35571	0	22135
35571	3	19145
33890	0	15227
20195	0	28296
20195	2	17865
861	0	445
861	2	34707
861	2	4996
861	2	7817
861	2	18651
861	2	21419
3551	0	5582
3551	2	36792
3551	2	32003
3551	2	22572
21324	8	8514
21324	4	90
30472	0	642
30472	2	29736
19608	0	29735
19608	2	27838
33108	0	29077
12100	0	7284
12100	2	20922
12100	2	31530
15539	0	19744
35799	0	11794
35799	3	16714
35799	6	14374
10124	0	7814
10124	3	11419
10124	2	32137
14677	0	37437
14677	3	29906
14677	6	32082
18388	0	13029
18388	2	8031
36555	0	6283
4475	0	11371
4475	2	10822
24244	8	25085
24244	4	12784
24244	4	770
23172	0	9793
25398	8	34995
12553	0	9411
12553	1	11435
12553	2	24767
16299	2	31732
25689	0	21050
11638	0	21492
11638	3	32740
21021	0	23144
21021	1	18511
21021	2	35227
7075	0	37750
7075	3	29984
7075	6	2387
35132	0	24030
35132	4	8062
25437	2	7785
25437	2	17835
25437	2	21407
1916	0	2520
5710	0	1989
34351	0	6182
34351	3	17655
22359	0	11369
12785	0	2494
12785	1	24339
12785	5	19801
12785	2	10998
12785	2	31587
12785	2	30134
15315	0	830
35713	0	23206
35713	3	19280
32078	0	23914
32078	4	6254
27543	0	32748
27543	0	13190
2519	0	7317
2519	2	26796
2519	2	27268
16602	7	37054
16602	7	28271
16602	7	34339
7055	0	9374
17290	0	854
17290	1	2651
22781	0	37035
8870	0	28013
8870	2	9909
8870	2	13596
8870	2	37677
8870	2	14150
37264	0	30122
37264	4	33136
15312	0	35261
17235	0	1865
20856	0	13357
20856	3	23186
31640	0	23523
31640	4	21900
9705	0	28839
16445	0	912
16445	3	15169
17400	0	31672
37525	0	21993
37525	3	8599
37525	6	36667
37525	6	24635
37525	6	19064
21405	2	20635
31454	0	1851
31454	4	722
31454	2	7696
31454	2	17511
34107	0	29657
34107	1	7094
9013	0	13719
9013	1	1659
2472	0	15448
8127	8	12536
29543	4	4919
29543	3	29788
10817	0	5789
10817	2	3120
10817	2	14182
10817	2	14016
10817	2	35489
10817	2	31633
10817	2	35638
10817	2	37606
10817	2	1246
8327	1	24339
34946	0	6182
34946	5	30233
35823	0	22653
23158	0	30063
25348	0	22228
11676	0	29671
1146	0	34760
1200	0	35284
1200	3	232
17703	0	3686
4198	0	28296
11582	0	13283
11582	3	23176
4461	4	33309
21470	0	6818
21470	6	35796
13084	6	25023
3213	0	12652
3213	2	12825
32795	0	10807
19760	0	23863
24322	0	25857
24322	3	17144
24322	6	30890
18181	0	764
18181	2	17129
11545	8	13299
11545	4	4927
11561	0	37366
11561	0	9659
13352	8	15538
13352	4	14819
26863	0	12482
12436	4	11888
6097	0	37030
6097	1	28401
6097	2	31494
6097	2	8970
6097	2	6969
6097	2	13373
6097	2	34608
15503	0	18648
15503	2	35866
5108	0	21674
5108	2	36618
5108	2	32516
23828	0	7530
11195	0	12946
1609	0	3842
1609	2	29221
1609	2	28429
24024	0	1986
29404	0	11166
29404	5	28213
21728	0	19163
21728	3	3261
21728	6	21789
19053	0	13357
19053	3	21641
24882	0	5146
24882	1	31940
11262	0	23659
11262	2	31579
37271	2	3408
37271	2	16520
23249	0	19890
19849	2	14383
3866	0	261
3866	2	25377
9172	8	24943
9172	8	31334
27733	0	37437
27733	3	26498
27733	6	19419
32310	0	34776
32310	2	14775
26834	0	3186
28992	0	33582
6502	0	16378
17560	0	825
2409	8	16540
2409	4	36264
35114	8	13769
2916	0	11404
2916	3	23204
29911	0	36941
32512	2	28041
30311	0	33221
30311	3	15057
13791	0	9827
13791	2	34534
3458	0	2187
3458	3	33407
3458	6	2485
9237	0	28572
9237	3	26603
37677	0	8870
37677	5	9372
9524	7	24498
5009	8	16990
5009	4	6189
3536	0	1395
31895	0	30754
31895	3	27359
32149	0	30441
32149	3	33932
26052	0	19895
26052	3	7291
13903	3	27300
13903	2	33768
13903	2	31412
31583	0	37243
31583	2	21191
31583	2	33348
31583	2	30698
31583	2	30473
31583	2	27831
31583	2	15585
31583	2	22313
18405	0	9554
6371	0	30754
6371	3	27359
13049	0	31786
2516	1	27869
2516	2	26373
2516	2	16260
2516	2	36473
2516	2	27377
2516	2	18140
9944	0	26842
9944	1	5453
2821	0	16982
2821	1	24339
23068	0	22874
23068	4	17507
23068	2	5206
23068	2	15711
23068	5	16907
3052	8	3040
3052	8	36303
33455	0	37071
18047	0	25520
3452	0	28431
9170	0	36520
13162	0	28839
13162	6	28827
13162	6	22849
13162	6	26262
13162	6	23532
13162	6	17411
30961	0	26579
30961	2	4135
985	0	13357
985	3	23748
37309	0	33635
32398	0	25857
32398	6	35680
599	0	6402
36651	0	20273
33767	0	37437
33767	3	29906
33767	6	1447
33790	8	22300
33790	4	33586
33790	4	32822
33790	5	30096
33790	5	17798
33790	5	35618
33790	5	32451
7380	0	13357
7380	3	2771
16860	2	11781
16860	2	12924
26066	0	2496
26066	2	14853
28838	0	18608
28838	2	22974
20257	0	15363
35604	0	4277
35604	3	17531
23917	0	15388
23917	3	22578
23917	6	20563
6756	0	35944
6756	3	9631
137	0	5812
137	2	7038
36220	0	8176
36220	3	2426
2206	2	29330
2724	2	7659
2724	2	1315
2724	2	34458
29055	2	28287
29055	2	2925
1542	2	34673
1542	2	12561
1542	2	619
1542	5	8243
21866	0	2427
19512	0	16268
19512	4	28807
25159	0	24096
25159	5	4463
36393	0	35284
36393	3	16450
277	0	715
277	2	28312
277	2	25575
277	2	25268
32699	0	26204
32699	5	2719
20271	0	2427
20271	3	6613
26519	0	13331
35508	0	705
4879	0	20273
22722	0	2027
30827	0	15388
30827	3	2675
30827	6	26113
31784	0	28931
24185	3	6062
24185	6	253
3412	0	35203
3412	2	32979
25902	0	10749
25902	3	26077
14564	0	16573
14564	3	9881
7229	0	23349
7229	1	23396
27058	0	37322
1029	0	35284
1029	3	22322
23849	8	16427
23849	4	8370
23849	5	7563
23849	5	26855
23849	5	27836
23849	5	22467
23849	5	23447
23849	5	22945
23849	5	2623
23849	5	26337
23849	5	20106
23849	5	28814
36046	0	833
36046	2	28550
36046	2	29030
36046	2	18208
36046	2	23907
2806	7	10565
28597	0	29415
3541	2	11296
3541	2	30772
3541	2	2367
35505	0	9827
35505	2	11355
35505	2	24124
35505	2	13848
35505	2	7516
35505	2	9971
35505	2	6846
990	0	4513
3548	0	6822
13911	0	29818
29221	0	1609
29221	4	8004
28624	0	28521
22679	0	21543
22679	2	30263
637	0	22732
14217	0	25292
14217	3	2856
36118	0	5022
36118	1	19653
20762	0	26547
20762	3	7411
1042	0	1840
34251	8	2423
34251	4	3446
3715	5	16284
28975	1	29228
19075	0	35800
19075	2	18269
19075	2	13945
19075	9	28453
19075	9	31185
19075	9	18169
19075	9	14326
19075	9	18379
19075	9	29334
19075	9	32535
17054	0	7924
3480	7	31173
4044	0	26571
12772	1	34357
12772	2	32733
12772	2	17911
12772	2	29278
12772	2	19507
12772	2	3978
12772	2	9692
26207	0	1976
26207	0	15520
26207	2	21654
18389	0	9920
18389	3	19027
19934	0	18056
19934	3	27800
21889	2	8386
26590	0	627
26630	2	2011
2391	0	27368
2391	3	21937
21674	0	23190
21674	2	5108
21674	2	18990
19067	0	12989
19067	1	29228
35154	0	9790
7451	0	6514
18894	0	2872
18894	2	9198
7250	0	4933
7250	5	25627
23344	2	20547
16844	0	1323
20810	0	17264
20810	2	11024
20810	2	16110
20810	2	26655
20810	2	4072
20810	2	5398
20810	2	29795
36422	0	35284
36422	3	682
1512	8	8514
1512	4	35754
21398	0	5653
5348	0	37626
5348	3	16132
673	7	2548
5603	8	858
755	0	1323
755	6	20314
32351	0	4689
32351	2	7382
20213	0	35229
28535	0	30922
19736	6	25747
30207	2	2398
30207	2	31625
30207	2	26397
23188	0	4594
23188	4	14554
23188	5	14331
23188	5	30815
1590	0	8268
37231	0	36168
26111	2	29681
26111	2	30509
26111	2	20247
26111	2	37717
8706	0	23899
32737	0	2545
32737	4	36942
13051	4	32319
2088	3	8695
15379	0	21316
15379	0	23113
6182	0	6214
6182	2	19266
6182	2	33262
6182	2	18115
6182	2	10436
6182	2	21902
6182	2	6706
6182	2	33751
6182	2	28768
6182	2	10258
6182	2	2847
6182	2	34351
6182	2	11163
6182	2	34946
6182	2	19974
6182	2	36706
6182	2	5077
6182	2	37142
6182	2	10504
6182	2	26449
6182	2	34836
6182	2	29622
9494	0	21165
9494	1	2651
5742	0	15299
5742	3	31382
33309	4	33025
33309	5	1797
33309	5	4461
5396	2	24372
5396	2	23026
7971	0	23285
7971	2	28843
11634	1	5453
28049	0	25940
26993	0	26969
26993	2	24861
33084	0	28212
33084	2	35530
8087	0	22687
8087	2	13955
8087	2	13519
8087	2	12108
12276	0	12448
12276	2	19825
19343	0	33681
19343	3	37618
33573	0	31713
4736	0	11893
4124	0	37609
12248	3	11017
30340	1	19491
28066	0	20270
29254	2	34563
31754	0	33749
33939	0	34099
33939	2	18904
6293	0	11227
6293	4	32223
[truncated: 106,197 more rows]
