# Supplementary material
Source: ML conference proceedings conference paper supplement (https://proceedings.neurips.cc/paper_files/paper/2021/hash/0fd600c953cde8121262e322ef09f70e-Abstract.html)
Supplement: Supplementary file 1 [file 0fd600c953cde8121262e322ef09f70e-Supplemental.zip › Supplementary_Material_Paper_8745/data/Hamaguchi-BM_head-1000/train/valid.txt]

11884	0	2151
2837	2	19739
1130	5	23597
19593	0	12296
14828	3	4423
2032	4	36005
2413	0	37626
18126	0	25857
18126	3	3792
14691	0	6995
26090	2	16845
11261	0	33246
34735	2	16681
14913	0	26645
35958	3	17192
22563	3	35345
11354	0	21589
25800	3	24512
25800	5	17194
18279	4	19970
200	2	22076
34310	0	9769
30969	8	8514
3551	2	9783
32512	0	32712
37677	4	8554
4879	3	24444
20810	2	18597
13051	0	23478
30340	0	13650
2999	5	13436
2859	0	17543
23448	0	30559
18077	0	18424
2447	0	3269
8931	1	8079
23632	2	26258
3523	0	14374
3523	6	2724
27925	0	15388
27925	3	2376
22366	6	33818
18332	1	2324
31791	0	14716
22710	2	24878
10396	0	28087
34850	0	2898
26450	4	34084
22511	2	18069
4707	3	29906
34072	3	20885
34252	0	24904
28888	6	15172
12467	0	16063
12624	3	34299
30144	0	18453
15392	0	19711
27695	2	25652
29669	3	24153
33393	2	270
4779	0	25857
1814	0	21479
32574	0	22698
32574	3	28345
27689	6	32204
26629	4	22266
29679	2	13978
29679	2	11899
17898	2	37328
5022	2	23578
7818	2	31029
7818	2	20889
7818	2	33086
10898	5	35486
10898	10	29609
36214	1	12032
34254	0	37750
35277	2	25839
32837	0	15244
6940	2	31385
32431	2	4690
17207	2	34411
34334	5	9770
17876	6	8125
23659	2	30472
31448	0	21071
285	0	25541
4015	0	12441
1633	0	28839
12909	8	8514
33482	0	19163
36902	0	11794
26045	2	28802
27749	3	8035
36104	3	24512
25470	2	6792
4698	2	5319
4698	9	4484
4698	9	26536
23411	5	11105
23411	6	14245
13795	0	13949
23264	4	2658
10442	5	3956
24400	3	21439
26120	8	1909
15694	0	28839
25806	5	27409
24795	0	32280
24795	2	607
245	0	21900
8643	0	17584
10223	3	25603
3674	0	35284
11182	6	19163
33764	3	20248
18228	5	14639
28214	4	17247
6642	5	1288
28953	1	17448
21584	0	34262
26299	0	15388
1721	0	10712
10712	2	22259
27419	6	16108
27419	6	9066
28872	3	4077
8237	1	24339
3529	0	33845
29419	2	25438
4512	2	16736
4512	2	36013
6752	0	2151
5450	6	30439
28038	2	6592
3608	1	17448
17545	0	23981
24949	3	31276
11383	0	22698
27501	6	21777
7612	3	4578
19796	5	22586
10951	2	37431
33670	0	13163
4485	2	37271
10992	0	28839
261	2	30035
261	2	21820
261	2	29136
17549	5	7179
29847	3	29906
5420	3	18840
25143	4	16449
21166	0	35380
23607	0	26906
36756	2	29394
11927	3	16945
10800	0	23448
25075	4	31416
22648	2	17925
23784	3	20954
33526	3	13627
14242	0	33880
13654	2	26657
25298	8	16427
33361	2	9161
5670	0	28087
5670	3	22610
2651	9	10983
2651	9	17999
2651	9	14438
2651	9	20112
2651	9	14809
2651	9	23604
22497	3	7166
25245	4	11050
18520	3	4784
18520	6	9733
18520	6	31171
20905	0	28083
18895	0	18219
11007	4	13346
7699	3	544
12900	0	14374
30024	6	37223
29318	0	22687
36114	0	30159
14633	3	1258
25705	6	9037
32961	3	25903
7743	2	2241
33842	2	3828
2187	2	33863
2187	2	15483
2187	2	13300
2187	2	4805
2187	2	9642
2187	2	21197
2187	2	7910
2187	2	10534
2187	2	11495
25520	0	16961
10849	6	37339
10849	6	13764
35754	6	3427
26959	4	25534
37503	2	5903
12962	2	33409
12962	2	3567
12962	2	27818
12962	2	33971
7111	2	33368
15538	2	29792
2954	2	13496
3543	4	30598
24568	0	37400
32294	1	1659
28178	5	10682
17434	2	19573
37361	3	16714
37361	6	35219
350	2	28771
11828	0	10086
14789	4	8900
19904	0	14203
33380	8	25085
20326	0	28334
14322	2	20870
2523	2	1104
16980	4	8293
3182	5	33308
19930	0	5507
36303	2	14539
36303	2	15511
36303	2	37363
9338	5	4247
15062	5	26495
16088	0	7510
25971	2	17682
25697	0	28839
2119	0	24219
5079	5	4964
5079	2	36880
18781	2	33020
19678	2	29436
1751	2	16840
6517	0	14203
14264	2	16802
7879	2	34133
2953	3	33684
35198	4	25562
6667	6	17059
12798	2	35506
31033	2	31968
35079	3	12366
12534	2	16594
15342	0	13670
15342	3	26318
34503	3	25678
20107	0	28013
32142	3	30292
18348	2	12949
18853	2	8101
1443	3	30266
25332	3	20387
25332	6	24857
21535	3	23162
14341	0	33047
4700	0	29040
30069	0	7003
26410	8	17952
23134	3	27173
6924	0	25224
37438	6	29595
36214	2	18706
22883	9	1237
22883	2	35525
22883	9	23305
22883	9	445
30324	0	14286
8322	5	1121
12615	0	13357
468	6	12902
3269	2	33393
3269	2	18659
7290	8	15538
17606	0	25538
18141	0	16560
15634	3	32678
25038	2	25035
25462	6	25869
21330	0	17434
20994	6	36272
16648	6	34535
16648	6	23966
9104	9	26722
12867	0	37437
24317	3	28896
12606	3	17506
27588	0	6029
27588	6	19736
32304	9	22592
7378	8	7722
7378	4	21110
7378	4	33870
24491	2	18760
24491	2	441
8775	2	28441
25228	3	554
24264	2	16181
20063	1	6388
23382	2	36473
9982	2	9880
34262	2	3025
34262	2	31160
14838	3	5450
6023	2	12625
20463	1	2651
34912	0	15196
20175	0	34618
18486	2	750
1527	3	10057
1258	6	20991
35941	0	22698
35941	6	18447
27688	2	32211
22905	0	27395
203	0	19998
30717	0	34908
29978	0	9233
17032	2	13989
25685	4	21637
6101	5	7921
13326	2	35982
20651	5	22645
22796	0	31424
34730	1	34357
874	0	28839
27153	0	6073
35145	6	22157
11502	0	11511
8479	2	25470
27596	0	1323
46	2	27516
27348	2	22544
9760	3	1568
23984	0	7095
29306	2	15266
23021	6	1272
23021	6	4630
4357	9	19959
1740	0	11625
11181	9	13508
12993	0	19163
14025	2	19712
14025	2	858
14025	2	14974
13398	3	26589
8048	2	31563
32711	6	26026
28131	9	27747
9386	2	19711
16450	0	33845
7575	5	18768
256	0	13357
29999	0	24976
422	2	30894
7579	2	7818
11043	0	19163
27180	0	18150
26333	6	29154
34708	8	15538
32275	3	25078
22236	2	15667
15825	3	1085
9843	0	33845
33515	0	28752
33515	5	20064
32720	2	34505
33819	6	28372
37063	2	5458
20551	3	16774
33667	3	28372
31850	5	14064
23108	6	3368
4741	4	9466
35574	2	23246
33311	0	14062
18878	0	10214
26367	2	8858
16586	8	13293
1018	6	18180
11420	3	29906
12367	0	37437
10502	5	23526
10502	5	2036
10502	10	8067
29054	6	33494
31207	0	22698
23101	0	37437
11903	1	10067
2122	0	33845
7309	3	36567
5699	5	20703
11672	4	33613
30745	1	24339
1613	0	21929
11976	4	16976
29098	0	4357
8052	4	16884
29228	9	23529
21201	2	28848
29443	2	29073
28215	0	23206
23863	2	33866
26288	6	8842
4805	3	31973
33632	0	14763
13126	0	35944
9423	2	12589
23261	6	17802
23432	6	30807
8562	1	2651
24016	1	24339
34424	5	34507
14875	6	29186
31521	0	32712
15693	2	27775
10703	0	2151
32956	0	19897
16716	0	28839
32820	0	10384
33389	3	8135
16390	9	23854
4606	3	18563
8606	5	29861
11526	9	21690
29788	6	27492
15512	6	4356
27747	1	28131
8046	0	9486
4504	2	4750
36873	0	13666
14767	3	32505
29910	0	28839
570	6	10625
33259	4	18003
32879	0	23547
1288	0	22236
11708	6	7129
16714	6	28714
29057	10	31504
29057	10	24545
29057	10	8067
18416	2	31645
1832	3	19538
7458	6	27038
34832	8	1822
18027	3	36721
16802	2	2904
4251	3	4460
28259	5	36783
5778	2	6499
5778	2	1956
11418	3	29906
10248	5	8226
480	3	7809
480	6	27928
10068	6	2742
36819	8	14399
16773	3	20075
6518	0	17968
33200	0	20572
27911	2	20879
8701	4	6310
34858	0	8080
27221	5	300
27221	5	18589
941	0	22236
16670	0	3248
22332	2	21069
18095	6	29743
37623	6	28250
3514	2	4859
11712	0	36741
15526	4	24789
24751	4	33586
9875	2	30206
34814	0	4422
34814	6	15316
34609	0	20868
36795	3	26775
9775	3	18621
20634	1	10466
917	2	29353
14962	3	18994
23229	6	18783
28426	2	22819
26291	2	10215
10098	2	16323
30040	1	2382
2068	2	8293
5170	6	8993
34118	3	2614
15647	0	14867
22646	3	25800
11716	2	696
7358	2	8103
21165	2	37498
11514	0	2174
3766	2	12415
7166	6	22497
3935	3	617
30017	2	17808
32355	0	4422
3152	1	1659
20885	3	13812
19857	3	29582
20973	8	2068
18798	5	8779
6576	2	34053
21227	8	22608
6914	0	30038
29997	3	9580
16439	2	30441
2324	9	18332
30028	3	29788
30353	0	20288
6817	0	15388
20322	2	22910
26376	2	23792
1939	0	27585
3740	3	8158
24127	3	25170
23570	2	2941
37753	0	14088
31075	6	6761
3987	3	6500
24010	9	26388
26567	4	22976
21278	8	35277
33870	8	2761
33870	5	37194
33870	5	7378
36768	2	3096
36457	3	4202
3637	1	24339
5422	0	18180
16321	9	29011
26516	2	20809
29709	8	30548
29709	8	6436
1266	8	13293
29923	3	18095
6090	3	25170
865	8	15538
34691	3	9705
7510	4	2926
5319	0	4698
32123	1	2651
16714	6	5360
1545	6	8989
1545	6	2506
2460	0	2225
25503	0	23190
833	0	19202
833	2	19090
4929	4	28300
22618	2	23523
4794	5	11828
12810	0	25857
32204	0	37626
14672	0	6454
22843	10	27799
14908	3	37223
37765	0	13357
980	0	5270
33879	6	3265
33879	6	8392
8030	0	37437
7868	0	14449
435	2	29365
28936	2	10747
19676	5	5936
11223	2	17138
17448	9	31507
17448	9	37599
17448	9	28848
11875	8	30784
35176	0	1690
35176	2	31682
22698	2	29578
22698	2	738
22698	2	23869
22698	2	4228
22698	2	3060
22698	2	28329
22698	2	21454
33575	2	11366
357	0	37092
2342	5	8503
23978	5	33308
9900	2	12581
9900	2	24048
22665	0	19163
11391	3	35865
29503	0	4789
34223	6	19753
37532	2	2164
33694	0	29564
33105	0	11794
18164	8	7722
9770	4	34334
28159	8	31334
4654	6	10608
24681	2	2433
28816	5	18398
17693	2	25354
34321	0	9021
4770	2	21859
34332	0	6344
26283	4	3518
7832	3	13324
7832	2	4691
8527	2	21615
21238	2	17862
23038	0	9937
16547	0	25687
31545	0	19113
16675	2	36713
12814	4	35198
2151	2	14374
2151	2	18853
2151	2	14449
2151	2	12699
2151	2	31360
2151	2	5354
2151	2	36813
2151	2	19748
24362	3	34382
9002	0	19904
20334	0	5188
3295	6	33303
12296	2	7574
20964	0	14119
15979	0	37750
32605	8	25771
5524	0	2110
23162	6	33998
18945	5	25725
12083	3	31004
32517	0	14438
36202	2	33268
34224	2	24228
24993	0	17862
9650	2	4051
23176	3	34569
21808	0	854
35261	2	20995
24582	2	2634
1561	0	9100
1561	2	31359
1561	2	23019
1561	2	9214
1561	2	87
30004	6	28196
14298	0	20273
9405	0	15388
7980	0	2151
36520	0	30937
31219	5	762
31219	5	15702
28912	0	26822
2432	6	29582
8321	0	2971
1631	6	26360
15518	6	37493
31581	2	30743
143	2	17160
143	2	21316
15434	4	22047
31206	4	387
13421	6	30349
36550	2	12748
8246	6	4394
37437	2	13168
37437	2	18829
37437	2	24538
37437	2	7088
37437	2	15295
37437	2	27590
37437	2	25729
16756	4	3518
6730	2	25438
13221	8	36837
15602	0	3492
25653	2	14063
25653	2	26158
11808	0	25857
15410	1	10466
26046	0	14449
18251	0	9982
18251	2	7582
27463	2	30792
13326	2	20595
22283	2	8871
19986	0	7999
28611	0	16592
25903	6	2721
23479	8	18699
16553	0	25857
22900	1	22883
22464	2	4055
7921	0	33545
30870	0	35840
3635	2	26862
8518	2	31179
5279	3	21218
5122	0	10603
5091	2	8582
26743	3	25466
10983	2	6616
22544	2	21568
34815	2	602
8458	2	1593
36015	0	18085
35284	2	20457
35284	2	19218
35284	2	15113
17053	2	22139
21103	0	25857
34898	3	1158
27352	0	14449
23908	2	24775
11089	0	28225
2741	2	18509
15633	0	2151
8340	0	23514
27848	2	22760
15832	5	37127
3051	0	32348
32643	0	34392
1568	3	614
4305	2	29264
36856	3	25203
31237	0	9887
28736	0	36536
15644	2	11228
17098	1	24339
17098	2	31387
24478	3	14397
28785	4	8503
7353	3	16648
30767	0	28211
14525	2	19854
9138	2	20781
14349	2	20693
22010	0	4512
21993	2	19152
28316	1	2382
4534	0	2009
26413	6	26074
16677	3	29144
9703	0	33657
9703	2	36893
18513	3	24621
15499	6	28414
5307	4	19839
33350	0	29932
19878	3	2438
17963	3	32262
17963	6	10367
34694	2	19817
19527	2	315
34301	3	25705
30005	2	26613
36898	3	1568
12807	0	9937
1064	0	33845
3591	5	24258
18344	0	31333
424	0	21042
8685	6	16819
16936	2	37577
24158	5	19947
30466	5	30614
36272	6	4249
36272	6	14048
101	6	31597
14369	0	22698
2642	0	8447
13355	0	34842
20853	0	5093
26135	1	24339
30210	0	11771
30210	2	6008
32624	3	32584
26148	4	34236
33775	1	17129
28623	0	15388
31561	2	5166
29881	2	15943
15929	0	33074
18278	3	29906
3659	2	9651
32406	2	30618
7701	2	7129
18807	9	31001
16699	2	20362
14306	0	2612
34581	6	3545
718	2	27958
18930	0	10624
26411	5	10939
26411	2	1550
26411	9	398
37642	0	15388
2283	9	1536
20420	5	27746
35188	0	22571
35188	0	21727
29582	6	14941
27057	6	15657
31080	6	4405
18999	2	14273
36168	0	23329
12400	3	5741
731	0	35216
16076	6	24539
18813	0	34939
27926	3	5073
29983	3	33879
5682	4	14053
5499	0	9611
6481	6	37100
14466	6	35700
2544	2	32184
35413	4	18945
961	6	7621
22079	2	7760
35663	0	21815
8735	5	8735
2027	2	9803
29268	0	32065
19537	6	29448
7756	2	16918
33864	2	5753
1612	0	15388
1483	6	10545
11480	3	37752
37364	6	22665
26880	2	250
11163	5	19953
2991	0	24497
2991	2	35292
26073	2	37347
33704	3	15498
27947	0	25857
15284	3	5741
15284	2	9432
3518	9	12499
3518	5	24873
3518	9	15925
13682	2	12513
36379	0	1496
4577	0	37750
8932	0	19768
738	6	37425
738	6	28820
8669	1	4698
7255	0	2495
12844	5	6435
8151	0	4960
6000	4	20565
15895	0	20273
35834	0	22698
35529	0	20273
6398	0	1334
31649	8	13293
27865	0	28839
8158	6	31085
8158	6	25052
9542	0	2187
9542	3	10562
6402	2	23398
6402	2	14178
6402	2	23970
35587	4	8293
20831	2	34681
29105	1	24339
35223	0	9149
35223	2	37441
11087	6	2196
8082	0	12686
21281	3	9009
15301	6	25243
15301	6	8977
35543	4	12753
29218	2	2244
31730	5	10541
8792	2	17803
8792	2	8043
15179	0	15388
28834	0	15388
17572	3	25972
26965	0	3248
9984	2	9832
32862	3	31204
18804	2	5160
17025	0	20273
20325	2	17588
20325	2	37740
18400	1	34357
36268	6	13600
24323	2	20852
10038	2	27850
30477	0	5847
9577	8	261
12958	2	26266
28213	2	27708
1982	5	24052
5642	5	26252
15637	3	3957
26659	0	34445
14011	6	29408
29037	2	34011
10905	0	37750
11705	0	11794
14087	0	37437
35645	1	10466
34712	6	7821
19627	1	21003
31429	0	10406
29008	9	14004
1661	3	25170
34039	3	24656
8081	0	33086
5896	1	2651
31333	6	20577
15885	2	13993
5705	6	25577
11166	2	18808
37413	2	4702
37652	5	2470
29569	0	22191
23524	4	16478
19163	2	35538
19163	2	15996
19163	2	11547
19163	2	5598
19163	2	15804
22275	2	3356
28763	2	30656
7262	2	36978
4919	5	5766
37404	4	28300
32163	9	11039
28332	2	8272
5503	0	37750
28839	2	12361
28839	2	30451
28839	2	21958
28839	2	25697
28839	2	21006
28839	2	9585
28839	2	31154
6359	3	10630
17502	7	10722
5232	1	29163
33068	0	34283
33068	2	33609
23590	10	34345
17157	3	8158
20844	6	16486
764	2	18608
20509	2	19981
26081	2	24582
17570	1	26548
11300	3	21936
3060	0	22698
37626	2	16089
25085	2	24789
9073	2	36756
15620	1	10466
36610	2	28924
641	8	8514
37810	2	34424
36175	0	37234
29415	2	25664
9427	6	13525
1650	2	7295
1650	2	4524
1650	2	6976
2686	3	25705
688	3	16714
13905	1	24339
22825	4	28300
25061	4	32605
14374	2	33317
14374	2	633
14374	2	6274
14374	2	15369
475	0	35284
36762	6	924
12185	4	31563
7744	4	661
11999	0	9078
13556	4	20584
9612	8	8514
31601	5	22214
15933	4	36343
15933	5	20575
15933	5	22581
22853	0	9169
29816	0	6344
13357	2	35944
13357	2	24015
13357	2	14648
13357	2	35925
37223	6	12993
1576	2	5209
22080	2	22808
36136	5	3411
5175	3	23017
28410	0	7131
6364	3	8166
12004	2	5958
12004	2	24097
16156	0	3567
35436	0	37750
554	6	25228
26256	0	19531
21080	2	367
32712	2	4194
32712	2	19791
32712	2	3179
26927	5	28682
13934	2	22452
36716	2	12359
17543	2	36314
17543	2	9874
17543	2	11912
15122	0	29060
29906	3	30296
29906	6	34634
29906	6	6878
29906	6	30649
29906	6	19025
29906	6	34197
17726	9	37441
16505	6	23928
22083	6	24194
30774	3	12110
2704	5	8555
12478	5	23221
11691	4	26609
1022	4	16974
22652	0	13357
9631	6	14445
9631	6	21028
21120	6	8710
13280	3	3261
14554	2	3603
14554	5	8080
9864	2	7888
28352	0	2187
18861	5	1491
18861	5	16306
32615	9	14477
5943	0	37750
8219	0	25857
4627	0	33845
7438	0	33545
4964	1	5079
21900	0	13136
37588	3	8599
3906	6	26851
12548	0	37437
37097	5	26342
9411	2	32058
9444	4	32017
29666	0	8262
20339	6	7911
6828	2	22959
28822	0	9158
22184	6	32236
13640	0	30180
10598	3	10080
25867	9	4961
25867	2	2741
19580	2	4656
19459	5	33540
10950	3	10849
6533	3	28954
37234	2	36175
37234	2	34861
37234	2	15865
3248	2	26965
3248	2	11746
3248	2	13157
3248	2	4466
3248	2	36308
3248	2	3511
3248	2	18923
4063	2	12976
31739	3	33743
14895	2	5169
34779	0	5249
36045	2	11129
36045	2	4865
10395	2	11258
30784	2	7183
30784	2	11872
26314	2	12219
26477	0	2174
21385	4	20570
32153	0	21688
36677	5	13405
24284	3	24194
9244	2	1663
9919	1	5453
4390	2	20711
14450	3	8483
2614	6	9125
12637	6	36430
8951	4	35558
21486	2	7563
21486	2	37658
21911	8	2761
26713	5	26342
27874	8	21486
27874	4	10502
22790	6	4760
10405	0	23070
14981	6	31718
28907	3	28706
34804	5	34823
9169	2	22853
15182	0	1323
20858	5	34431
2171	2	16756
27634	3	1018
33216	6	32153
35261	2	24062
2155	2	3837
32178	0	37276
2611	0	35840
2076	0	34362
37248	0	1496
37248	2	24784
15959	0	2986
26345	3	35816
26837	0	28839
16245	0	21583
16245	4	12473
5089	1	24339
14932	0	764
33933	2	9423
22632	3	4861
15553	2	32042
36839	6	4926
19382	0	25000
32189	6	27624
9332	0	29463
10099	2	6310
10903	2	20156
18833	2	21727
21599	2	37634
20827	2	4301
36264	8	21486
12678	2	35824
3126	8	261
19916	10	25939
20615	5	27403
25626	2	20831
7944	2	18477
33628	5	28927
4237	0	17543
18768	4	7575
37212	6	25142
8293	5	7737
6	2	23467
17088	3	11142
5092	3	3967
1158	6	15886
28820	0	22698
36482	0	14554
2186	1	8193
17083	2	163
8795	0	17543
35268	2	34625
1906	5	4215
6508	0	2151
2332	0	3896
36437	9	18113
25796	6	1676
8033	0	20397
27591	0	28839
24339	9	5634
24339	9	16794
24339	9	1883
24339	9	18054
24339	9	21269
24339	9	32038
24339	9	3346
20288	2	15924
20288	2	7800
35440	2	20865
15533	4	11096
13323	8	2761
30984	0	1141
6553	0	16140
9483	0	20273
887	3	36260
24902	0	10406
24902	3	4419
22653	2	5938
5983	0	14429
37241	0	15102
19198	3	26693
16887	4	29384
27708	9	27194
27708	9	16213
10274	2	2547
21781	2	33791
1654	2	25195
13642	2	18319
22360	2	5283
4269	0	28655
30438	2	21560
17382	2	24209
20918	2	10469
20918	6	36530
31461	0	36540
31461	1	13363
31488	2	28658
22987	5	20822
28262	6	34254
344	6	31141
3638	0	28752
27471	2	22385
9316	0	33845
33748	0	16563
33344	3	36347
4808	4	37622
2634	2	31367
19474	5	20744
3948	1	24339
23879	5	327
25615	1	34357
13016	0	2151
32486	1	34248
19924	2	4441
35345	3	29377
24695	0	35506
21936	6	11300
27365	6	10337
30696	0	74
19755	10	17141
23206	2	32462
23206	2	4405
23206	2	32530
23206	2	9982
14772	4	14772
16875	4	36136
1348	0	1323
35417	0	24426
8493	2	30943
29839	0	18291
24581	3	9913
9102	0	24142
16426	8	16009
20548	4	8293
1782	0	28323
21088	2	9310
15698	6	33317
22730	2	27964
5440	0	2532
20470	2	33047
20470	2	29867
7782	5	31510
12130	5	20724
15393	0	30993
8013	2	14541
25631	1	24339
2001	0	23206
7361	0	25716
27712	3	23261
19515	5	24755
19515	10	811
19515	10	7710
6257	2	22372
28325	8	21486
7735	0	15388
12812	2	3342
14628	4	8293
36678	2	21720
32892	0	12296
4419	6	34098
25379	3	2405
18824	2	316
2219	0	28880
30270	0	17542
19414	6	33772
14758	3	29788
12584	6	18730
28188	0	944
28188	1	24339
15925	0	19130
3881	0	26081
2875	0	11954
12135	5	23346
7157	2	15284
34480	0	32748
8514	2	36148
8514	2	34605
8514	2	930
8514	2	32639
8514	2	35397
8514	2	5709
8514	2	12497
8514	2	36364
33086	4	12021
8765	2	6209
34091	3	24672
28908	4	15442
7924	2	9036
7924	2	16937
7924	2	1894
22119	0	7924
37817	3	15338
26937	0	11224
21221	4	21133
12826	0	25857
12826	3	13367
9734	3	2376
1659	9	13813
36667	0	30159
26594	0	20991
6268	0	15388
10080	6	14456
31528	0	2151
18083	1	34357
15648	0	23845
31480	0	22698
8345	0	1323
22174	0	18464
34854	4	36110
25870	6	31024
25033	0	2187
6751	0	14034
26456	8	8514
19528	5	35250
10593	2	2745
2009	2	4926
29320	5	22713
12072	2	31734
12072	6	26599
15505	2	30428
22321	0	26022
1869	0	34837
20546	0	30937
8078	3	10975
22196	4	13158
19001	6	5999
13248	0	16369
31596	6	7459
16376	0	25195
37563	0	21163
35343	0	2151
26002	0	20076
15992	4	35978
15992	4	31563
30991	6	885
30991	6	37066
20682	6	6892
13968	6	9112
13968	6	20248
16976	2	8012
20388	6	17166
30521	0	4512
19908	2	4953
16982	0	20470
6405	1	9104
15802	6	16727
13293	2	21924
24452	2	2174
11366	2	19889
12949	0	12487
31834	0	9984
24954	5	8738
15322	2	1582
9420	3	8799
15574	1	2651
22404	2	1010
28210	0	251
37321	2	34808
35679	0	22055
28121	0	19645
23165	4	290
30589	4	14336
21361	6	15502
16018	6	10891
16018	6	29067
2603	0	32730
36751	2	21734
7334	6	5044
22829	0	36094
5188	2	20334
17828	0	21827
25451	2	11316
588	0	31521
13896	0	7467
36607	0	35211
25797	3	7452
5353	0	4535
28609	2	21484
26627	2	29788
5258	5	18448
31920	2	13593
14203	2	5309
4840	9	19859
24094	3	24621
34242	9	30779
34242	5	28573
32728	2	23529
3040	1	179
26190	9	15681
2168	2	18028
19913	3	5559
23498	6	18704
1760	2	7162
36807	0	1561
16910	5	2143
16910	5	22424
16910	5	17767
27692	4	31378
18557	0	9021
10362	6	5417
14449	2	14351
14449	2	2239
14449	2	15776
14449	2	18248
14449	2	16270
14449	2	3235
3299	6	30294
16973	0	4144
16973	2	22070
10466	9	14073
10466	9	6931
10466	9	31140
10466	9	9960
10466	9	33747
10466	9	34506
10466	9	10834
10466	9	8179
32003	2	22873
7947	2	23180
8735	0	23507
31871	2	22884
12075	6	83
32058	0	9411
10960	2	34357
34485	4	6136
30200	4	13181
30178	3	9107
5940	0	1323
26888	0	25343
33345	8	13501
22208	6	22172
4067	0	10406
118	0	22571
33018	2	17331
23350	3	25204
28222	3	31567
33714	2	1814
10108	2	37542
547	0	25295
13114	0	23478
27447	8	8514
21437	2	1684
29144	6	31411
25221	0	33315
33574	6	26139
25258	0	29980
15388	2	4745
15388	2	14570
15388	2	23890
15388	2	2153
15388	2	22184
15388	2	186
15388	2	34439
15388	2	33363
15388	2	17931
15388	2	9846
30213	0	14449
14919	2	28267
21583	0	6402
21583	2	16245
6527	0	2171
31824	3	11182
715	2	9270
8049	0	29331
3145	0	14493
680	0	34262
18915	2	9935
18915	2	25495
12354	6	28160
9856	3	17920
14557	0	2151
10321	6	28489
28521	2	21034
34405	2	15825
35550	0	2342
24266	4	32712
1676	3	25796
6390	5	20703
17075	3	25678
13367	6	8156
13367	6	5162
10322	3	30913
26947	8	30784
33657	2	928
23533	8	31137
14123	6	24453
10478	0	18150
6949	3	11143
6184	3	29906
32785	0	8367
1950	4	31574
8683	6	32476
12236	0	6935
33498	1	29228
33910	2	10453
32822	8	20565
19191	0	15210
32238	2	17338
7636	0	447
9573	3	302
14256	3	37525
19623	0	18628
16751	2	23564
33702	6	10929
36540	2	20491
34940	0	6096
1541	3	26104
20201	0	29225
20201	4	34890
35607	0	547
5602	4	4648
32822	5	3952
29186	3	14875
34619	3	29750
20581	2	19531
20581	2	23162
20581	2	35219
14150	5	16133
6773	4	10272
16343	3	9626
6164	2	8112
14365	3	29144
34892	3	570
13552	0	21583
13552	4	2513
27952	9	8205
8425	3	20985
34724	0	11511
25500	0	1141
30013	0	20273
13342	6	25359
36342	0	27109
5968	0	14449
30711	8	8514
1465	2	32534
17416	6	31371
18386	0	7261
15210	2	36757
15210	2	23364
15210	2	35689
15210	2	22062
15210	2	6047
15210	2	17764
26775	6	9405
14773	2	22061
10969	0	17471
37188	0	17103
24672	6	2777
11131	0	19163
13980	6	36518
28852	3	26288
9247	4	37249
27132	3	10364
24351	0	33967
11681	8	14399
14868	6	1675
14868	6	27854
19458	0	11511
30614	0	15128
13363	9	1343
13363	9	16376
13363	9	27022
13363	9	5380
10406	2	34098
10406	2	25942
10406	2	12095
34955	4	28300
5636	5	13814
31477	2	31786
34523	3	25972
11621	3	20388
17682	2	27520
36243	0	28426
19325	0	35506
1194	6	12939
28413	4	3591
4697	3	8683
9572	2	19872
11557	3	25472
24804	0	15388
29002	2	24734
20688	3	6189
35653	0	15210
33260	3	20387
29921	2	32431
15498	6	33704
22845	6	27785
22410	3	11078
24539	3	16076
9453	0	9650
7009	6	23824
7435	4	33073
5001	2	3766
22584	3	7809
4498	0	36692
13028	2	36460
29675	0	23595
27653	6	15680
23507	2	22296
23507	2	21983
26331	2	19310
29954	0	15388
3112	2	34682
25163	0	22236
29965	2	29225
9800	2	32196
36986	3	3057
35576	4	25377
26137	2	37769
28428	3	33684
2658	5	4155
8450	8	1822
31720	0	22236
27620	6	2621
20273	2	14298
20273	2	28481
20273	2	26194
20273	2	27102
20273	2	10562
20273	2	4654
25561	0	11100
36620	0	11954
36661	0	37750
37367	4	20869
37367	2	25613
5498	0	20470
9467	1	18592
37787	0	4391
25630	0	27688
15502	3	21361
14119	2	36690
6531	0	4496
35181	0	20991
37103	0	24548
7292	3	20494
34143	0	22362
34143	9	20870
23981	2	17545
16996	0	33221
399	0	7317
18560	2	1295
29461	4	16974
3069	3	5354
36144	2	18682
26432	1	6804
22587	0	583
32885	0	27171
15708	7	5826
33330	6	5669
25829	0	37063
30014	3	8740
30129	4	1130
22229	4	23475
6262	8	27029
1278	2	18717
33876	2	24872
15689	0	32251
18628	0	24866
25552	0	3050
31597	3	101
521	2	21565
25538	2	17606
1698	0	9362
37827	2	294
9202	3	14856
17978	3	19308
10749	0	22288
6388	9	5256
6388	9	20063
6388	9	21891
36894	2	4408
11060	4	17639
2010	2	5314
5187	2	11558
27585	2	36944
27585	2	14219
33762	2	9568
2990	0	36540
36944	0	27585
22539	3	10337
23387	2	13011
12251	0	16699
25603	6	36216
2337	0	24409
24075	0	9236
21544	4	1982
14273	0	18999
13654	2	32854
2817	0	33762
34919	2	2357
29874	0	1290
6759	2	28812
28894	0	15388
28894	3	14934
24415	2	10821
16188	2	31471
13038	6	13788
22068	0	21993
20412	3	5150
32316	4	17247
31898	0	5789
5329	0	7700
9568	3	2061
7304	0	30938
9107	0	1323
9107	6	186
9107	6	16031
30839	5	6339
34872	0	30180
11648	2	33707
17799	0	16699
24994	6	14333
1088	1	10466
29657	0	5418
20845	0	19678
36837	4	23141
17725	3	26360
3153	2	9231
25885	0	23672
25885	2	8493
29457	2	8447
33128	2	10407
30223	2	280
8080	2	12638
8080	2	33852
234	3	26256
3560	3	12389
30840	9	28743
28578	4	30445
7225	6	33192
35395	3	24656
24618	0	36751
25226	6	2792
14717	0	27993
11193	4	24266
21791	0	1561
20714	0	2187
2109	0	18853
95	2	21516
21633	0	33845
34785	3	3464
18075	6	31015
18075	6	19994
10189	2	7885
309	2	37366
30447	0	36789
22280	4	8543
22280	1	31940
17886	2	25169
4565	0	20273
4565	6	4469
18107	5	2640
31372	0	22698
4845	0	14449
28781	0	20273
22349	5	2797
30159	2	27834
30159	2	16183
25076	2	25777
33352	0	15885
14663	6	30991
30351	2	14414
31411	2	34045
5235	0	2151
19609	2	17336
37548	2	15080
19812	3	4202
24184	0	23455
24184	2	30122
32108	5	33120
32108	2	18056
3201	3	29906
27520	0	17682
30792	4	14306
2349	6	16962
2420	0	5453
13926	0	25000
13926	2	18355
30757	0	26411
17165	5	25244
29606	2	20064
35702	5	36014
8035	6	3523
8035	6	3365
19579	9	553
7941	4	25562
36955	0	37626
12373	3	8717
32777	0	35182
12363	2	8212
7703	5	26030
149	2	2574
17252	8	1822
9158	2	28822
9383	8	13231
24673	0	33845
11020	0	18915
28752	2	27403
19998	0	1920
514	2	9594
20070	6	9188
13222	8	18466
25949	2	35615
4432	5	8739
17965	0	3647
22527	3	6314
42	0	37750
27065	3	33704
278	0	36999
7802	0	1711
8510	8	8514
37470	6	10683
16310	2	32382
14565	0	29453
21550	0	21929
27556	4	901
35182	0	1505
19353	0	17490
14864	3	17111
19890	2	24450
20129	4	32951
20129	4	31365
17110	2	30738
29156	3	31952
2958	0	27409
5197	0	15388
14701	3	23678
1822	2	4031
1822	2	13612
1822	2	9870
6797	6	1545
2629	4	32503
14145	0	26010
37786	0	8169
26498	0	1334
21586	6	19294
20080	2	8800
32348	2	16648
32348	2	29643
5281	6	12815
7762	4	28214
24656	6	7119
37460	2	7528
3499	2	4221
26606	0	32728
18674	2	29819
14786	0	36004
7481	2	6087
6282	8	14399
834	2	36209
27758	0	435
3395	6	14128
19573	2	6178
15155	1	17129
28300	5	10926
32873	5	1260
22058	2	26078
25225	3	26294
6710	0	7095
30684	2	25748
25878	2	13015
18969	2	31660
18969	2	34751
36961	4	16935
36961	4	34890
12981	9	26736
17386	3	2540
17386	2	32951
26197	9	10111
31321	6	4756
7105	2	13430
10155	8	25215
14351	0	14449
14351	6	13971
28573	8	1822
31615	8	36303
9554	2	21396
18805	4	33558
17215	0	22236
16721	0	35567
31986	1	2651
4513	2	34216
31457	2	15742
31457	2	21124
7713	3	29906
36139	3	343
24131	0	18820
15773	3	23986
1777	4	10112
19768	2	6739
19768	2	29984
19768	2	26202
19768	2	8164
30292	6	9186
2007	0	28839
22967	0	123
17199	3	3781
33119	3	25705
36178	5	16891
35491	0	36446
5734	2	3554
26997	0	17542
27459	2	10066
9712	0	2187
4004	0	37750
14443	0	26949
14443	2	20029
4474	0	19714
1323	2	9107
1323	2	24503
1323	2	351
37788	0	27304
25294	2	23070
11880	0	8034
29595	3	37438
18028	0	2168
3964	4	3964
4391	2	32873
4391	2	5731
1277	0	14449
15142	5	11165
7758	4	18055
15816	3	3898
32438	1	8079
29755	4	16910
31162	2	24622
30116	0	33749
7342	2	6456
4727	6	7582
35466	0	29727
32951	5	11184
21929	2	22848
24036	0	37787
29138	2	31453
32302	0	31385
19007	4	14554
36632	0	25827
2269	8	2761
2269	4	17587
25215	2	23445
25215	2	33712
2426	6	26033
12219	0	26314
16009	2	16426
12238	4	16974
12800	2	36433
36509	2	10682
8651	2	9220
26198	5	22535
30603	6	16670
3110	0	23481
20565	4	35066
20565	2	28369
33447	5	24566
18003	5	11317
33795	3	37498
6172	0	34262
11794	2	343
11794	2	30967
11794	2	20339
11794	2	11848
[truncated: 246 more rows]
