# Supplementary material
Source: ML conference proceedings conference paper supplement (https://proceedings.neurips.cc/paper_files/paper/2021/hash/0fd600c953cde8121262e322ef09f70e-Abstract.html)
Supplement: Supplementary file 1 [file 0fd600c953cde8121262e322ef09f70e-Supplemental.zip › Supplementary_Material_Paper_8745/data/Hamaguchi-BM_head-5000/test/test-graph.txt]

4446	0	36599
38038	3	5529
37961	0	15925
37961	2	16747
37786	0	14005
37786	2	6153
37786	2	21146
37786	2	31909
37786	2	16983
37786	2	33092
28533	0	38110
11622	4	36553
37125	2	31253
3458	0	37364
12215	0	36870
37706	0	20980
37706	6	30918
37706	6	26792
37706	6	21160
37706	6	32602
37706	6	23250
37706	6	21683
37706	6	34571
37706	6	633
37706	6	21979
37706	6	17582
37706	6	3114
37706	6	9938
37706	6	12781
37706	6	33780
37706	6	19432
37706	6	32628
37706	6	20233
37706	6	13139
37706	6	29143
37706	6	3205
37706	6	36039
37706	6	28020
37706	6	21808
37706	6	15285
37706	6	5062
37706	6	25810
37706	6	25361
37706	6	6940
37706	6	33416
23192	3	36702
33026	0	37098
10553	3	37542
29358	3	36934
23923	0	37177
37732	8	3356
37732	8	11335
36920	3	18482
36920	6	24426
36920	6	13072
12360	8	37415
25243	3	37972
17527	0	37288
14865	3	36459
31968	2	37270
37057	0	8979
37431	6	25370
37431	6	580
37431	6	34512
37431	6	19640
37431	6	32458
13767	0	36774
23185	3	36839
36503	9	26657
36503	9	2785
36503	9	5156
36503	9	11995
36503	9	22798
36503	9	34066
36503	9	25031
36503	9	30366
36452	6	16261
36452	6	21341
36452	6	27586
36452	6	31024
36452	6	1074
36452	6	28364
36452	6	17962
36452	6	17473
36452	6	19394
36452	6	1151
36452	6	215
37256	0	18455
37256	3	22894
37256	6	22969
29160	0	36679
3912	3	37331
37175	5	22163
37175	5	8447
37175	5	26295
32295	0	38036
1076	5	37131
27600	0	36707
24541	0	38036
30738	8	38006
32266	1	36648
37995	5	9961
25491	4	37068
36617	10	16467
36617	5	35808
36617	2	23176
36617	5	12528
36617	5	7432
36617	5	2097
36617	5	17604
36617	5	15868
36617	5	8712
36617	5	16599
36617	5	1010
36617	5	13740
36617	5	8076
36617	5	9570
36617	5	14940
36617	5	33280
36617	5	11124
36617	5	16924
36617	5	34536
36617	5	28340
36617	5	6659
36617	5	16974
36617	5	26534
36617	5	22159
36617	5	30151
36617	5	19046
36617	5	23780
36617	5	9320
36617	5	27283
30349	4	37487
32014	4	37390
21287	0	36904
35961	3	37589
37683	5	33489
37740	0	991
37740	2	7185
36559	8	8186
36559	4	17957
37452	6	2346
37490	6	10104
11017	3	37300
3928	3	36929
19195	0	36711
36883	0	30544
23576	1	36648
36760	0	1494
36760	2	21309
36760	2	450
36760	2	19570
36760	2	8189
36760	2	16807
36760	2	8503
36760	2	3172
36760	2	29712
36760	2	29951
36760	2	29656
25864	0	36567
35414	3	37680
28565	4	37033
22928	1	37621
20555	0	36995
12103	3	36609
37527	0	33928
37527	2	5882
37408	4	29666
37408	4	24185
37408	2	31106
37408	2	12937
37408	2	34860
37408	2	10064
37408	2	25924
37408	2	11782
37718	2	15802
20411	8	37383
16108	0	37518
26001	8	37383
16112	1	36450
37487	0	32616
37487	4	34295
37487	5	2229
37487	5	28732
37487	5	11389
37487	5	30349
37487	5	31057
37487	5	529
37487	5	10051
37487	5	32919
18641	0	37189
37412	0	29906
37820	8	14431
37820	1	20222
36287	3	36869
28921	8	37310
30347	0	38106
30347	3	36597
36398	8	38001
36398	8	36734
10684	4	36977
12022	0	36825
16736	4	36840
36614	2	6589
38095	9	25398
38095	9	21629
38095	9	26638
38095	9	19020
38095	9	15041
38095	9	9988
38095	9	19392
38095	9	13753
38095	9	33690
38095	9	2090
38095	9	23990
38095	9	8741
38095	9	25784
38095	9	8163
38095	9	18469
38095	9	28298
38095	9	26326
38095	9	25995
38095	9	35319
38095	9	29089
38095	9	35364
38095	9	28743
38095	9	32981
38095	9	32987
38095	9	21752
38095	9	2741
38095	9	22487
38095	9	33169
38095	9	35943
38095	9	18887
38095	9	13420
38095	9	32437
38095	9	22156
38095	9	28367
38095	9	6764
38095	9	27882
38095	9	23507
38095	9	15895
38095	9	22444
38095	9	16006
38095	9	22670
38095	9	30679
38095	9	3341
38095	9	2147
38095	2	21765
38095	9	31600
38095	9	33355
38095	9	4251
38095	9	29456
38095	9	906
38095	9	15494
38095	9	4440
38095	9	9149
38095	9	17147
38095	9	14241
38095	9	26474
38095	9	18839
38095	9	27169
38095	9	17618
38095	9	31425
38095	9	35387
38095	9	25113
38095	9	24747
38095	9	6840
38095	9	12936
38095	9	33008
38095	9	24556
38095	9	9810
38095	9	14984
38095	9	11786
38095	9	22800
38095	9	35014
37676	3	23242
37676	2	26333
8298	6	36935
36552	4	28074
36552	5	18663
36552	5	1767
36552	5	5706
36552	5	10522
36552	5	30325
6969	0	38151
37351	6	34959
36795	0	18683
36795	4	32426
3267	0	36878
17154	0	37376
2313	3	37197
36690	2	27435
36690	2	2164
38078	0	21858
38078	6	19869
38078	6	5199
38078	6	30719
38078	6	10978
23371	8	38001
8862	0	36446
36744	5	28975
36495	0	25023
36495	2	23986
36495	2	10145
36495	2	11587
36495	2	19846
36495	2	18013
36495	2	13693
36495	2	2906
36495	2	15198
36495	2	9345
36495	2	10034
36495	2	24350
36495	2	25939
36495	2	28904
36495	2	3868
36495	2	18314
36495	2	24944
36495	2	4166
36495	2	5529
36495	2	28264
36495	2	13242
36495	2	23482
36495	2	12972
36495	2	3903
36495	2	30182
36495	2	31660
36495	2	17813
36495	2	28958
36495	2	26037
36495	2	29654
36495	2	33010
36495	2	2037
36495	2	33533
36495	2	36172
36495	2	33967
36495	2	29541
36495	2	18505
36495	2	31772
36495	2	35927
36495	2	381
36495	2	24355
36495	2	6668
37996	3	23728
37996	6	27044
27698	6	37251
37663	0	2413
37475	2	4618
37475	2	15141
37475	2	7127
37475	2	23398
36632	2	23484
36632	2	9491
36632	2	9175
37144	5	35754
8078	4	37417
37099	3	34447
37099	6	15108
37099	6	30745
37099	6	30692
37099	6	28483
37099	6	8111
37099	6	21467
37099	6	3810
37099	6	13338
35666	0	36514
2919	0	37650
3917	4	37739
6570	0	37080
36966	2	32762
36966	2	4611
37899	2	21927
37899	2	10660
37899	2	1857
37899	2	19666
37899	2	6719
37899	2	12589
37899	2	29919
37899	2	3562
37899	2	22036
37899	2	23057
37899	2	33811
37458	3	13825
37458	6	20069
36678	0	18811
36678	6	27809
36678	6	7894
36678	6	9820
36678	6	32144
36678	6	25596
38042	0	21983
38042	2	8038
38042	2	2885
38042	2	26569
38042	2	19902
38042	2	22554
36817	2	14588
36817	2	17464
36817	2	36190
36817	2	11223
36817	2	12991
36817	2	21736
36817	2	28507
36817	2	24362
36817	2	29691
36817	2	24188
36817	2	5190
36817	2	11024
36817	2	17405
36817	2	13917
36817	2	19961
36817	2	10898
36817	2	15349
36817	2	9840
36817	2	2472
36817	2	6344
36817	2	32223
36817	2	18179
36817	2	14678
36817	2	2949
36817	2	27449
36817	2	32016
36817	2	22567
36817	2	27608
36817	2	15947
36817	2	17017
36817	2	21662
36817	2	12841
36817	2	29472
36817	2	19302
36817	2	4041
36817	2	31977
36817	2	35979
36817	2	22230
36817	2	29259
36817	2	29584
36817	2	27896
36817	2	33470
36817	2	6307
36817	2	1568
36817	2	32597
36817	2	30907
36817	2	31657
36817	2	31822
36817	2	32478
24326	1	36648
37424	0	20794
37424	2	22514
37424	2	35877
22939	8	37090
25101	0	37042
22286	0	37826
38142	3	6019
38142	6	10405
3598	8	37415
37962	2	11481
3150	0	36644
36898	0	32555
36898	6	13092
37469	6	15946
37469	6	14935
2918	3	37789
37424	2	33873
37340	3	21279
37187	0	8875
37187	2	12669
37187	2	23488
37187	2	14440
37187	2	28691
28244	0	37288
36869	6	34100
36869	6	32561
36869	6	10532
36869	6	25865
36869	6	16192
36869	6	16862
36869	6	17887
36869	6	24659
36869	6	27848
36869	6	23726
36869	6	3608
36869	6	11815
36869	6	4278
36869	6	974
36869	6	17647
36869	6	20828
36869	6	24040
36869	6	2665
36869	6	12819
36869	6	15990
36869	6	18414
36869	6	8704
36869	6	13543
36869	6	24967
36869	6	18092
36869	6	27960
36869	6	36287
36869	6	5324
36869	6	8647
36869	6	34845
36869	6	7062
36869	6	22285
36869	6	28750
36869	6	33269
36869	6	31650
36869	6	27158
36869	6	15715
36869	6	9919
36869	6	7243
36869	6	19908
36869	6	9375
36869	6	36323
36869	6	14621
36869	6	372
36869	6	11716
36869	6	7973
36869	6	31805
36869	6	14301
36869	6	32157
36869	6	19205
36869	6	21559
36869	6	19809
36869	6	21184
99	3	37712
37877	3	5168
37877	6	14333
8256	4	37385
36804	0	14005
36804	3	19322
36804	2	28071
36804	2	12585
4041	0	36817
36555	3	34339
36731	6	13722
36610	2	33248
37164	6	6269
6879	8	38001
38024	0	9557
38024	3	28857
38024	6	29874
38024	6	23909
38024	6	32486
36930	5	247
36887	0	25405
36887	9	35801
36887	2	5161
36887	5	35093
36887	5	25616
36887	5	17287
36887	2	3375
36887	5	3916
36887	5	18509
36887	5	13883
36887	5	31617
36887	5	33303
36887	2	25320
36887	5	33070
36887	2	33680
36887	5	8937
36887	5	20572
36887	5	6635
36887	5	27566
36887	5	18048
36887	5	36256
36887	2	18171
36887	5	28676
36887	9	2286
36887	9	25656
1904	2	37403
36792	2	31639
36792	2	27723
36792	2	4602
36792	2	20335
36792	2	26715
36792	2	15497
36792	2	13628
36792	2	13801
36696	0	24877
36696	6	25859
37721	2	9686
3114	3	37706
36734	2	32525
36734	2	36398
36734	2	12608
36734	2	25237
36734	2	13177
36734	2	20491
36734	2	29087
2465	0	37583
38013	8	19814
38013	5	6530
38013	5	2842
38013	5	23455
38013	5	12559
38013	5	6017
38013	5	24838
38013	5	31990
38013	5	29357
38013	5	1364
38013	5	26426
14465	3	37748
25902	1	36648
37194	0	19829
37194	2	33624
37194	2	21596
37194	2	1176
37194	2	9448
37194	2	1448
37194	2	35242
37194	2	32770
36984	4	5225
10229	0	37560
36823	0	28680
36675	3	25673
36675	6	7797
36675	6	16482
36675	6	20356
36675	6	20870
36675	6	31798
36675	6	9417
17813	0	36495
15028	3	36560
37182	8	13683
16523	8	38130
25732	3	37978
37314	3	3787
37314	6	36339
37314	6	13836
37939	0	8174
37939	2	27638
37939	2	10335
37571	0	29241
37084	5	31012
5918	0	37824
5918	2	37824
25887	3	37107
22285	3	36869
884	3	36700
36757	2	5598
5099	3	38089
37520	2	17939
37520	2	17100
37520	5	337
37007	2	10844
13278	0	37516
36639	0	36164
36639	4	31289
36639	4	3295
36639	4	8362
36639	2	32957
36993	4	11547
36993	3	14763
36993	10	13054
36993	10	7262
36993	10	20885
36993	10	28648
36993	10	33198
36993	5	20276
36993	5	4186
36993	5	15671
36993	6	8041
36993	10	22108
14819	0	36542
13293	0	37446
38066	6	581
37148	2	17459
37148	2	30314
7663	0	36833
7663	4	37794
27640	0	36774
37374	2	19259
37374	2	11028
37374	2	13564
37374	2	18656
37374	2	2525
37374	2	3404
37374	2	32710
37374	2	30312
37374	2	31681
37374	2	16720
37374	2	22627
37374	2	35155
37374	2	7964
37936	0	31462
37936	5	28191
37936	2	35066
37936	2	21399
37936	2	34762
37936	2	28301
37936	2	28148
37936	2	32433
20235	0	37190
10767	0	36577
36515	2	18191
36515	2	22865
34603	0	37966
38130	2	24078
38130	2	28038
38130	2	25769
38130	2	16222
38130	2	465
38130	2	7948
38130	2	26156
38130	2	10333
38130	2	16333
38130	2	32644
38130	2	13731
38130	2	13218
38130	2	16523
38130	2	10311
38130	2	30263
38130	2	30262
38130	2	1670
38130	2	18318
37598	6	21063
22513	0	36875
20234	0	37691
25300	0	37600
24941	1	36648
32666	0	38036
33644	4	36791
37145	8	8186
37145	4	18795
37609	4	15236
37609	4	27387
37609	4	1556
37109	2	17065
37109	2	2891
37109	2	641
32525	8	36734
37429	0	31462
37429	2	26937
37429	2	16178
37429	2	31480
37429	2	15861
33207	3	37755
36924	3	5476
36924	6	35621
37059	2	27322
37059	2	15232
38065	5	14289
38065	5	25138
38065	5	10560
38065	5	6932
38065	5	32488
38065	5	36178
38065	5	10127
38065	5	25420
38065	5	32550
37667	0	25092
37190	2	31815
37190	2	19374
37190	2	20235
37190	2	27688
37748	6	18267
37748	6	8576
37748	6	30833
37748	6	16850
37748	6	3197
37748	6	28663
37748	6	12424
37748	6	23826
37748	6	19520
37748	6	17063
37748	6	18491
37748	6	22717
37748	6	14465
37748	6	8249
37748	6	25189
37634	2	24807
37634	2	22034
37634	2	33229
37634	2	13802
1570	0	36612
24872	0	36607
37655	0	18811
37655	3	28235
9972	0	37083
4158	4	37115
7782	3	37901
37371	0	4664
33316	3	37252
36635	0	3819
36635	6	33010
37241	0	10947
37241	1	25201
19052	3	36894
36904	2	29891
36904	2	21287
37096	8	15849
37096	8	15735
1580	0	38104
36794	6	14910
36794	6	22774
36711	0	8752
36711	2	6841
36711	2	30929
36711	2	13773
36711	2	28201
36711	2	34623
36711	2	666
36711	2	3158
36711	2	256
36711	2	21719
36711	2	19195
36711	2	32071
36711	2	591
36711	5	6560
36502	2	1451
36502	2	3104
24824	4	37684
28879	8	37415
27939	3	37457
38055	6	6141
36963	0	31564
36963	2	6166
36612	2	1570
36612	2	9295
36612	2	36075
36612	2	15381
36612	2	17108
37791	2	28829
37791	2	24763
37791	2	7831
37791	2	26453
37791	2	27032
37791	2	23798
24069	0	36514
24069	6	37843
37155	8	25718
37155	4	19819
37155	9	26523
37155	9	10880
37155	9	23000
37155	9	27427
37155	9	9448
37155	9	34272
37155	9	28753
37155	9	17664
37155	9	24079
37155	9	34489
37155	9	22530
37155	9	12476
37155	9	5196
37155	9	17037
37155	9	35611
37155	9	14449
19871	4	37953
37537	1	23431
37537	2	32850
31559	3	37514
15161	0	37549
37591	0	3690
36752	0	24740
36752	0	9703
36752	4	17432
9962	0	36756
36684	0	4236
36684	9	8924
36684	9	5525
36684	9	2136
36684	9	35392
36684	9	26074
36684	9	31065
36684	9	20707
36684	9	26236
36684	9	30401
36684	9	32682
36684	9	8112
36684	9	9259
36684	9	33763
36684	9	12939
36684	9	16548
36684	9	2228
36684	9	27701
36684	9	12917
36684	9	26523
36684	9	5400
36684	9	31496
36684	9	16884
36684	9	22218
36684	9	21621
36684	9	17427
36684	9	12764
36684	9	6169
36684	9	13595
36684	9	29845
36684	2	32105
36684	2	19909
36684	2	29327
36684	2	15352
36684	2	28429
36684	2	31795
36684	9	20379
36684	9	31652
36684	9	16119
36684	9	33453
36684	9	29244
36684	9	20802
36684	9	34762
36684	9	3461
36684	9	21035
36684	9	36061
36684	9	31716
36684	9	23080
36684	9	25193
36684	9	34670
36684	9	24553
36684	9	5867
36684	9	5463
36684	9	6007
36684	9	1400
36684	9	3293
36684	9	14380
36684	9	31722
37418	8	31053
21323	0	37042
36474	6	18426
36474	6	19722
37385	8	20695
37385	4	24598
37385	5	20152
37385	5	22644
37385	5	13837
37385	5	23558
37385	5	8256
37385	5	14756
37385	5	18780
37385	5	35784
36699	0	11340
896	0	37533
37544	2	7256
36424	0	11184
36424	3	12486
36575	0	12447
36575	9	26268
36575	9	25230
36575	2	25555
36575	9	5977
36575	9	13055
36575	9	15308
36575	9	536
36575	9	13575
37888	6	21446
36954	3	27610
8041	3	36993
37265	5	31386
38119	6	3713
36840	0	1494
36840	5	32456
36840	5	16736
36840	5	32667
38031	8	24263
38031	4	343
38031	4	21446
38031	5	10773
37315	0	32743
37315	2	17392
37315	2	14596
37315	2	18520
37315	2	31135
37315	5	4174
36732	0	12001
36732	2	28584
36590	3	12999
36590	5	31046
22271	0	37654
37579	3	16250
37426	0	44
37426	6	1288
37426	6	2277
26295	4	37175
37567	2	12577
37567	2	5504
37567	2	9957
37567	2	35832
37567	2	18273
37487	4	10980
37813	0	14490
36530	0	14747
36530	2	31006
36530	2	22418
37669	0	14810
37669	6	20209
37115	8	2647
37115	4	16929
37115	10	570
37115	10	11418
37115	10	16406
37115	10	3270
37115	5	4158
37115	5	9821
37115	5	34111
37115	5	21732
37115	5	29406
37115	5	22876
37115	5	23689
37115	5	16515
37115	5	24292
37115	5	439
37115	5	0
37115	6	22538
37301	5	5813
37301	5	22386
37301	5	32115
37301	5	844
37301	5	31433
37301	5	25664
37301	5	28592
37301	5	10642
37301	5	17873
37301	5	16044
37301	5	26438
37301	5	8212
33008	1	38095
4825	2	37243
38128	6	6550
36616	3	10191
36442	0	5293
36442	1	10006
36442	2	9731
36442	2	32765
37387	0	15127
37387	3	26299
38067	1	30930
38067	2	13107
36997	3	19593
36997	2	12683
37974	6	12891
37974	6	20065
36991	0	1263
36991	3	27551
34144	5	37086
3408	0	37035
36912	5	2290
36912	6	33018
36450	9	16112
36450	9	24601
36450	9	9376
36450	9	19284
36450	9	30879
36450	9	5714
36450	9	32427
36450	9	22022
36450	9	36204
36450	9	24237
36450	9	15457
36450	9	7026
36450	9	4917
36450	2	29577
36450	2	19509
36450	2	20758
36450	9	12537
36450	2	23549
36450	2	1390
36450	2	35777
36450	2	12484
36450	2	8092
36450	2	7207
36450	2	29122
36450	2	33990
36450	2	1247
36450	2	27161
36450	9	4000
36450	9	35009
36450	9	14519
36450	5	29222
36450	9	25372
36450	2	31521
36450	9	15582
36450	9	31674
36450	9	4315
36450	9	22819
36450	9	18069
36450	9	23395
36450	9	35211
36450	9	29537
34447	3	36506
34447	6	37099
23339	4	37068
36777	2	22298
36777	2	25414
36777	2	15983
36777	2	26117
36777	2	12083
37089	0	18455
37089	6	30906
12297	5	37062
37695	2	14647
37695	2	34253
37695	2	27094
14740	0	37055
38135	0	9487
38135	2	2698
38135	2	24115
38135	2	25222
38135	2	21030
38135	2	13054
38135	2	1005
38135	2	17713
38135	2	9300
37167	9	24521
37167	9	3910
37167	5	6660
37167	2	6111
37167	2	18540
37167	2	14669
37167	2	11274
37167	2	16164
37167	2	11450
37167	2	21242
37167	2	389
37167	2	2360
37167	5	25092
37167	9	33354
37167	9	19557
37167	9	34183
37167	2	28192
37167	2	22999
37167	2	15582
37167	2	22961
37167	9	30813
37167	9	14118
36531	0	7044
36531	2	26222
16637	1	36648
37710	2	17985
36475	2	17897
5550	0	37797
15832	0	37116
37871	0	31112
37871	3	24596
37871	6	18320
37871	6	10509
36872	2	3524
36872	2	7767
36872	2	18419
36872	2	18947
36872	2	12267
36872	2	4449
36872	2	12033
36872	2	7420
36872	2	568
36872	2	26585
36872	2	23966
36872	2	6458
36872	2	21789
30252	0	37763
30252	2	37140
10405	3	38142
38014	0	28522
37756	6	4024
37334	2	21134
37334	2	23516
37334	2	27778
12843	8	37415
12843	4	36834
5857	1	36443
10823	0	36435
37168	0	11861
37168	2	1338
37168	2	31384
37168	2	29492
37168	2	20557
37168	2	10395
37168	2	19118
37093	2	13839
3714	0	36636
3714	2	37701
16902	0	37050
2800	3	37849
3315	0	38036
36256	4	36887
35789	0	36642
38037	4	14005
38037	4	12675
38037	4	6152
38037	2	36318
2413	2	37663
37293	6	8499
36569	3	16936
2929	8	37090
37049	8	1869
17376	0	37808
37832	6	23046
12659	0	37248
37764	0	32356
37937	0	7069
37937	2	4002
37937	2	14420
37937	2	24021
37937	2	11758
37937	2	34772
34853	0	37191
2113	0	37023
21063	3	37598
18792	0	37940
35018	3	38064
37383	0	15325
37383	2	11075
37383	2	24283
37383	2	23503
37383	2	20826
37383	2	22200
37383	2	25360
37383	2	17251
37383	2	829
37383	2	24059
37383	2	5670
37383	2	19770
37383	2	2964
37383	2	18334
37383	2	14837
37383	2	24751
37383	2	32010
37383	2	22320
37383	2	2883
37383	2	31301
37383	2	4177
37383	2	14780
37383	2	36372
37383	2	216
37383	2	34592
37383	2	8319
37383	2	19063
37383	2	33294
37383	2	28317
37383	2	9955
37383	2	17353
37383	2	30922
37383	2	16982
37383	2	7022
37383	2	34232
37383	2	31750
37383	2	15701
37383	2	5283
37383	2	20411
37383	2	33559
37383	2	30163
37383	2	18326
37383	2	3728
37383	2	19490
37383	2	30042
37383	2	10313
37383	2	26844
37383	2	17992
37383	2	19128
37383	2	26719
37383	2	822
37383	2	26777
37383	2	9243
37383	2	31546
37383	2	22302
37383	2	26355
37383	2	883
37383	2	26624
37383	2	20396
37383	2	33813
37383	2	32182
37383	2	26659
37383	2	18020
37383	2	32051
37383	2	30548
37383	2	19931
37383	2	14496
37383	2	80
37383	2	17000
37383	2	11575
37383	2	35516
37383	2	35773
37383	2	5627
37383	2	3639
37383	2	32017
37383	2	1006
37383	2	34997
37383	2	16094
37383	2	9563
37383	2	25746
37383	2	24418
37383	2	13362
37383	2	26330
37383	2	27229
37383	2	8291
37383	2	27817
37383	2	36166
37383	2	8323
37383	2	1317
37383	2	9411
37383	2	21608
37383	2	15261
37383	2	34097
37383	2	8480
37383	2	8800
37383	2	22275
37383	2	27451
37383	2	19152
37383	2	9886
37383	2	10600
37383	2	26370
37383	2	19969
37383	2	26001
37383	2	25634
37383	2	35965
37383	2	31574
37383	2	5408
37383	2	19017
37383	2	35258
37383	2	16137
37383	2	29767
37383	2	22822
37383	2	31845
37383	2	27589
37383	2	27201
37383	2	6980
37383	2	606
37383	2	12059
37383	2	34991
37383	2	33264
34166	0	36970
37223	0	27810
36789	6	13930
36672	2	3732
978	3	37227
22954	8	38043
22954	5	36723
37199	0	5636
37199	1	1375
28087	4	37060
37284	3	11392
37284	6	1618
37284	6	21255
37284	6	5322
37284	6	19744
37284	6	17851
36487	0	9603
36487	6	17547
36487	6	16150
36487	6	21407
36487	6	15880
36487	6	28936
34755	0	36644
36490	2	28830
36490	2	23227
36490	2	16724
991	0	37759
991	2	37740
32952	4	37220
3565	0	37761
27853	1	37082
36642	0	6326
36642	2	12756
36642	2	14568
36642	2	36119
36642	2	22106
36642	2	30768
36642	2	29439
36642	2	35789
36642	2	26075
36642	2	3335
36642	2	21166
36642	2	33567
36642	2	8904
36642	2	2082
37710	2	11255
37710	2	34848
37710	2	27649
37710	2	1487
37710	2	6877
37710	2	26984
37649	2	30984
37649	2	35722
37649	2	27166
37649	2	18990
37649	2	27748
37649	2	18941
37649	2	25679
37649	2	22507
37649	2	7465
25211	0	37865
37716	0	7858
37716	2	9234
37716	2	26449
37716	5	34361
37716	2	23013
37716	5	8306
25578	0	36892
37028	6	26736
37028	6	11925
37028	6	25001
37028	6	19286
37028	6	4842
37267	0	7044
37267	2	22411
37267	2	21322
37267	2	457
37267	2	33571
37267	2	27740
25615	2	37892
18360	1	37082
1447	4	36669
36824	2	14899
37473	3	33637
36589	4	27015
37291	0	2060
37291	6	8400
27435	0	36690
14801	0	37785
38104	2	32888
38104	2	8364
38104	2	5949
38104	2	12264
38104	2	1580
38104	2	21503
38104	2	7203
38104	2	11860
8883	0	36446
9127	1	36648
5182	2	36952
37356	1	5692
37356	1	6545
37356	2	33564
30541	4	37465
19374	0	37190
24027	0	37189
37520	2	30365
5070	3	37973
19493	1	37891
37831	0	14745
37831	4	20088
37831	2	13056
37831	2	21499
37831	2	29279
37831	2	2893
37831	2	32543
37831	2	31651
37831	2	20510
37831	2	15148
37831	2	9515
37831	2	27078
37831	2	6824
37831	2	2870
37831	2	1612
37831	2	22389
37831	2	25979
37831	2	866
37831	2	10343
37831	2	7984
37831	2	5045
37831	2	29481
37831	2	29426
37831	2	27569
37831	5	34378
37831	2	20597
37831	2	28745
37831	2	5488
37831	2	34813
37831	2	32185
37831	2	5756
37831	2	9691
37831	2	2423
37831	2	13727
37831	2	5124
37831	5	14095
37831	2	18742
37831	5	4184
37831	5	34406
37831	5	24806
37831	2	1500
37831	2	18206
37831	2	9434
37831	2	9844
37831	2	27001
37831	2	17624
37831	2	31504
37456	0	23132
37456	4	3164
36841	0	18455
36841	6	25110
1697	0	37166
9480	0	36615
36454	0	9557
36454	6	16946
36454	6	16737
36454	6	29302
36454	6	14086
36454	6	1968
36454	6	17921
36454	6	14933
37248	0	20980
37248	2	12659
37248	6	22077
23506	0	37035
31904	2	38002
31904	2	37333
37608	2	19571
37608	2	1823
37608	2	15182
13486	0	37472
36512	8	1979
36512	5	28779
36512	5	23418
36512	5	27298
36512	5	13936
36512	5	34167
36512	5	8159
36512	5	25265
36512	5	11088
36512	5	13874
36512	5	34547
36512	5	36173
36512	5	19141
36512	5	13954
36512	6	4668
16761	4	37597
19872	0	37833
35979	0	36817
28829	0	37791
36718	2	3005
36718	2	9163
37854	0	6265
37854	5	18822
37854	2	8064
37854	2	8489
23566	1	38115
10003	3	37183
37280	0	29904
37280	2	1344
37280	2	21448
37280	2	30281
873	0	36948
37454	2	12637
15494	1	38095
14214	8	37309
3230	0	36914
5528	0	38152
36725	3	9356
36725	6	22943
29837	1	37621
23495	3	37411
7761	0	36485
37464	2	12963
16695	3	36457
23056	4	36826
37874	4	16267
38040	0	19023
38040	2	16340
16765	4	37532
37855	2	4099
9899	3	36438
36927	3	1973
36927	6	30861
36927	6	5713
36927	6	16851
37261	0	21595
37261	6	18795
37261	6	21933
37261	6	8551
37261	6	35698
37261	6	16449
37261	6	13704
37261	6	25693
22517	0	36955
23297	0	37074
33057	4	37171
13043	0	38036
37630	0	26249
37630	9	6260
37630	9	14555
37630	9	25980
37630	9	10094
37630	9	33004
37630	9	22063
37630	5	18783
37630	9	11264
37630	9	34381
37630	9	23040
37630	9	5151
37630	9	2914
37630	9	19676
37630	9	5270
37630	9	27076
37630	9	27099
37630	9	17474
37630	9	14059
37630	9	26742
37630	9	17332
37630	9	5865
37630	9	15717
37630	9	16168
37630	9	5006
37630	9	27040
37296	2	31154
37296	2	33128
37942	0	31462
1613	0	37681
37826	2	36057
37826	2	10278
36488	4	2410
36488	1	24263
36488	2	10007
37476	2	4778
37476	2	19996
37586	0	23280
36958	0	11340
36958	3	29025
36958	6	1753
36958	6	5066
36958	6	9336
36958	6	9126
36958	6	22422
36958	6	35750
36958	6	13591
36958	6	32617
36958	6	3593
36958	6	29967
36640	3	8382
36640	6	14683
36640	6	34706
38114	0	28505
38114	2	30101
37014	0	7015
37014	2	13788
37448	2	21847
37448	2	6672
33070	4	36887
37286	0	11340
37286	6	16379
6626	4	36473
11125	2	37313
36533	2	8163
36533	2	23878
36533	2	17791
36533	2	32448
36533	2	11278
36533	2	12838
36533	2	5520
36533	2	24380
36533	2	22016
36533	2	22544
36533	2	27512
36775	2	4433
36775	2	4262
37761	0	22024
37761	2	7760
37761	2	5412
37761	2	29352
37761	2	33075
37761	2	29918
37761	2	13128
37761	2	29171
37761	2	25752
37761	2	8731
37761	2	22815
37761	2	31113
37761	2	35020
37761	2	28825
37761	2	3565
37761	2	938
37761	2	23120
37761	2	28976
37069	6	35463
37680	0	11340
37680	6	6547
37680	6	747
37680	6	5347
37680	6	35414
37680	6	24325
37680	6	9968
37680	6	13825
37680	6	34339
37680	6	20838
37680	6	24868
37680	6	553
37680	6	2528
37680	6	18074
37680	6	16344
37680	6	35814
37680	6	1821
37680	6	25673
24080	3	36884
37282	0	32616
37282	4	10051
36483	0	32555
36483	6	4754
36483	6	30043
36483	6	11637
36483	6	29107
20681	3	38085
37546	0	5603
37546	4	11200
37546	2	21354
37546	2	8175
37546	5	21942
36853	2	2971
36853	2	31691
36853	2	7943
36853	2	161
36853	2	24570
36853	2	11842
36853	2	3832
11954	0	36999
36785	0	25404
36785	2	20231
36785	2	31960
36785	2	127
36637	4	4485
3117	0	36529
3117	3	38123
30833	3	37748
37353	5	8066
24291	0	36859
37497	2	4387
37497	2	2262
17324	4	37068
1390	0	36450
37083	0	27726
37083	2	33261
37083	2	14245
37083	2	20779
37083	2	13406
37083	2	26112
37083	2	34572
37083	2	2556
37083	2	34520
37083	2	8410
37083	2	32839
37083	2	5745
37083	2	33770
37083	2	20154
37083	2	10436
37083	2	9972
37083	2	236
37083	2	28867
37083	2	25135
37083	2	20639
37083	2	32821
37083	2	16827
37083	2	9082
37083	2	34634
37083	2	29893
37083	2	32752
37083	2	9890
37083	2	23981
37083	2	15700
37083	2	26011
37083	2	24013
37083	2	23121
37083	2	21829
37083	2	24050
37083	2	31081
37083	2	5983
37083	2	3751
37083	2	20694
37083	2	13372
37083	2	7188
37083	2	21693
37083	2	24106
37083	2	15473
37083	2	70
37083	2	9499
37083	2	32905
37083	2	4356
37083	2	10099
37782	0	3411
37782	2	12724
37782	2	9954
37782	2	22126
37782	2	7215
37782	2	4589
37782	2	26186
37782	2	30641
37782	2	14584
37782	2	28234
37782	2	6815
37782	2	8119
37782	2	29913
37782	2	5438
37782	2	3051
37782	2	7671
37782	2	9693
37782	2	32848
37782	2	20491
37782	2	17931
37782	2	2395
37782	2	24294
37782	2	20097
37782	2	29087
23994	0	37192
15284	0	36978
36729	2	12429
37768	0	14810
37768	6	13644
26326	1	38095
36835	0	2852
36835	0	22216
36835	9	5932
36835	9	2498
36835	9	23790
36835	5	13730
36835	5	35024
36835	9	24125
37797	0	29589
15870	0	36516
36778	2	34220
36778	5	5003
36778	2	30991
36778	2	31923
36778	2	5026
36778	2	36117
36781	0	31150
36781	4	27446
36781	2	15246
36781	2	28567
36781	2	13499
36781	2	12784
36781	2	12057
16758	0	37583
37023	3	10554
37023	2	15472
37023	2	34116
37023	2	2113
37453	4	4123
37453	10	13248
37453	5	27330
35993	0	37521
36992	6	10394
37593	6	16080
36446	2	21841
36446	2	35684
36446	2	8862
36446	2	11721
36446	2	21364
36446	2	8883
36611	0	5127
36611	2	8556
37260	0	11714
37260	2	19796
36700	6	27071
36700	6	884
13543	3	36869
36686	6	6929
37434	0	5463
37434	2	29283
37434	2	27117
17179	1	36648
28700	3	36758
38085	6	20681
38085	6	31778
23740	0	38036
36825	0	27950
36825	5	29052
36825	2	35100
36825	2	31609
36825	2	12022
36825	2	17102
36825	2	36227
36825	2	12719
36825	2	13233
37019	4	27211
38072	6	920
38072	6	22659
38072	6	35189
38072	6	18076
11064	0	37583
15135	0	37646
36574	6	30173
36597	6	33082
36597	2	1434
36597	6	30347
36597	6	31303
36597	6	5940
36597	6	10463
37576	6	5402
24366	4	37068
36989	8	1748
36989	5	18091
31800	3	36457
38015	0	31432
36791	8	24796
36791	5	22062
36791	5	33644
36791	5	23436
36791	5	14174
36791	5	3707
36791	5	24159
36791	5	22691
37549	5	945
37549	5	32302
37549	2	15161
37549	5	17511
37549	2	11705
36546	0	14807
36546	4	5894
37122	2	28583
37122	2	15552
2370	3	38025
12858	0	37842
36852	0	1898
36852	2	824
36852	2	11337
36852	2	1216
36852	2	18080
36852	2	28621
21446	3	37888
37438	6	27912
37438	2	13492
37438	2	32109
37438	2	16857
30240	4	38079
23010	0	37191
36977	10	10203
36977	10	10888
36977	10	33644
36977	10	2546
36977	10	19430
36977	10	25257
36977	10	16237
36977	10	35027
36977	10	10951
36977	5	11981
36977	10	8921
36977	10	4986
36977	10	35712
36977	10	15723
36977	10	30451
36977	10	4299
36977	10	10248
36977	10	3480
36977	10	28098
36977	5	19550
36977	5	14175
36977	5	11912
36977	5	10684
36977	5	23671
36977	10	23671
36977	5	16291
36977	5	21891
36977	5	20122
36977	5	14757
36977	5	21429
36977	5	5283
36977	5	34958
36977	5	35911
36977	5	23400
36977	5	31737
36977	5	6584
36977	5	30214
36977	5	25450
36977	5	18862
36977	5	8473
36977	5	2495
36977	5	30737
36977	5	3190
36977	5	6337
36977	5	20329
36977	5	20357
36977	5	4945
36977	5	25159
36977	5	22175
36977	5	3291
36977	5	9057
36977	5	20442
36977	5	31891
36977	6	34389
36977	6	32191
6824	0	37831
38137	6	5990
38137	6	14990
2523	3	36648
31046	4	36590
15497	0	36792
15034	0	37793
36737	8	8186
38039	4	20640
30052	0	37541
37397	2	26563
37312	2	10466
37312	2	13010
37835	0	24877
37835	6	19336
14474	3	36767
9932	4	37068
26075	0	36642
27654	0	37734
37040	4	20211
37040	5	35951
32608	0	36948
30230	2	37461
10056	0	37367
36899	0	27726
36899	6	33741
36899	6	24095
37840	0	11824
37840	2	166
37840	2	23541
27552	0	37722
21675	4	37736
6307	0	36817
24714	8	37415
[truncated: 17,625 more rows]
