# Supplementary material
Source: ML conference proceedings conference paper supplement (https://proceedings.neurips.cc/paper_files/paper/2021/hash/0fd600c953cde8121262e322ef09f70e-Abstract.html)
Supplement: Supplementary file 1 [file 0fd600c953cde8121262e322ef09f70e-Supplemental.zip › Supplementary_Material_Paper_8745/data/Hamaguchi-BM_head-5000/test/test-random-sample/test0.txt]

38038	0	13590	1
16563	8	5404	0
37961	2	21629	1
10532	2	21083	0
37786	2	21674	1
17320	0	37379	0
37125	0	9144	1
23436	4	31692	0
37706	6	33781	1
8623	3	12999	0
37706	6	4066	1
36869	7	19093	0
37706	2	2163	1
2947	8	13676	0
37706	6	34609	1
7299	6	14609	0
37706	6	16086	1
22047	5	37299	0
37706	6	3596	1
31560	6	1711	0
37706	6	33602	1
13874	6	38049	0
37706	6	30633	1
17082	3	4891	0
37706	6	31350	1
23566	6	37528	0
37732	8	21977	1
37299	2	37601	0
36920	0	18455	1
36869	7	17320	0
36920	6	30072	1
27640	6	28273	0
37431	0	21858	1
32058	0	5404	0
37431	3	5512	1
8623	5	36454	0
36503	9	19295	1
2472	6	13874	0
36452	6	23095	1
5244	2	4891	0
37256	6	32897	1
18567	8	6509	0
37175	0	1494	1
4000	4	16563	0
37995	0	38058	1
31560	6	28273	0
37995	2	19334	1
15689	9	29588	0
36617	5	36348	1
28273	4	31692	0
36617	5	37969	1
32058	9	8281	0
36617	5	3479	1
14609	8	5191	0
36617	5	37281	1
37911	6	31692	0
37683	4	8226	1
25921	3	36702	0
37740	1	27492	1
5124	2	23566	0
36559	4	3873	1
37912	5	21613	0
37452	3	37746	1
343	2	37365	0
37490	0	38106	1
31560	5	6509	0
36883	2	5309	1
5191	8	346	0
36760	2	28698	1
17082	3	18053	0
36760	2	15844	1
21824	6	36972	0
37527	1	38144	1
14609	10	32058	0
37408	0	22280	1
5244	2	4891	0
37408	2	19626	1
11863	6	29226	0
37408	2	23911	1
14298	8	37528	0
37718	0	11318	1
11863	8	1711	0
37487	5	10055	1
19117	8	21083	0
37412	4	34985	1
32058	5	37528	0
37820	1	2195	1
37528	5	38049	0
36614	3	13925	1
27640	2	26281	0
38095	9	20539	1
27897	2	23436	0
38095	9	20083	1
7987	6	35951	0
37676	0	12847	1
37912	1	36869	0
36552	5	7602	1
31904	2	38049	0
36552	5	6623	1
37299	3	5124	0
37351	0	23693	1
14154	2	5404	0
37351	3	37509	1
6509	6	9604	0
37351	6	20995	1
343	9	517	0
36795	1	6886	1
36702	3	18311	0
36690	0	36504	1
36972	9	37692	0
38078	6	4844	1
26281	4	19117	0
36495	2	10254	1
12999	3	15802	0
36495	2	37611	1
22914	4	18311	0
36495	2	38140	1
36516	1	8281	0
36495	2	12686	1
17082	9	29044	0
36495	2	4171	1
27032	9	36972	0
36495	2	30916	1
18053	8	4319	0
36495	2	11884	1
37601	6	8041	0
37996	0	32555	1
517	0	9840	0
37663	1	26796	1
105	1	14609	0
37475	2	20536	1
12999	6	37912	0
36632	2	27167	1
343	9	1094	0
37144	3	1033	1
37379	2	26281	0
37099	6	13451	1
3810	1	3810	0
37099	6	37402	1
31798	6	36702	0
37099	6	7680	1
3339	0	2472	0
37099	6	7730	1
37601	2	12725	0
37099	6	26613	1
9604	4	32058	0
37868	0	11719	1
343	5	14609	0
37278	0	26360	1
37911	10	29588	0
36966	2	36580	1
343	8	31798	0
37899	3	4039	1
15438	3	38049	0
37458	0	38036	1
31560	10	28568	0
36678	6	36965	1
29044	9	18195	0
38042	2	29551	1
36620	1	37379	0
36817	2	34279	1
5404	2	12725	0
36817	2	11428	1
38145	6	29588	0
36817	2	32167	1
9840	2	29760	0
36817	2	27904	1
37912	5	14154	0
36817	2	36780	1
29044	6	4609	0
37424	2	10914	1
21613	8	27897	0
38142	2	16206	1
36972	2	16563	0
37962	0	1494	1
31692	9	19117	0
36898	3	7692	1
3339	8	17690	0
37469	3	37715	1
21083	3	29044	0
37340	0	37465	1
9604	6	14609	0
37187	2	24954	1
15438	9	9840	0
36869	3	27796	1
35951	4	9794	0
36869	6	15409	1
27032	5	5314	0
36869	6	31981	1
36454	0	37299	0
36869	6	13404	1
21824	6	14298	0
36869	6	16754	1
37601	6	14298	0
36869	6	23520	1
5314	3	105	0
36869	6	26232	1
12999	9	14154	0
36869	6	16304	1
12725	2	37912	0
36869	6	32400	1
2472	0	13676	0
36869	6	19036	1
8281	1	2472	0
36869	6	258	1
21613	2	29760	0
37877	0	10011	1
37912	5	36702	0
36804	2	18529	1
1711	0	4319	0
36555	0	19527	1
343	4	343	0
36731	0	36325	1
9604	3	31798	0
36731	3	27635	1
27032	6	1149	0
36610	0	37417	1
9794	4	21613	0
37164	0	11068	1
4000	6	517	0
38024	6	5783	1
1149	6	36702	0
36930	4	36617	1
13874	8	29044	0
36887	5	11430	1
31560	6	29044	0
36887	9	13402	1
36454	10	10923	0
36792	2	23735	1
517	2	9794	0
36792	2	16473	1
5314	5	12725	0
36696	3	11628	1
36869	6	3339	0
37721	0	18977	1
26281	5	17690	0
37721	1	25201	1
2472	3	10578	0
36734	2	7578	1
517	5	12725	0
38013	5	25160	1
22914	7	32058	0
36984	4	22206	1
5404	0	3810	0
36823	2	21925	1
21613	3	31904	0
36675	6	35645	1
27897	6	5124	0
36675	6	24081	1
5244	9	7987	0
37182	4	18196	1
18567	2	17320	0
37314	0	14810	1
4000	3	9604	0
37939	1	5235	1
8623	7	31560	0
37571	3	37755	1
25921	10	4891	0
37084	0	4944	1
29588	1	37911	0
36757	0	36711	1
37601	8	15689	0
37520	0	28714	1
3339	6	10532	0
36639	4	1401	1
7987	4	13874	0
36993	6	19453	1
14298	4	1149	0
38066	3	34899	1
32058	1	9840	0
37148	0	25641	1
4319	3	38145	0
37374	0	37899	1
23436	0	31560	0
38005	8	29602	1
28568	9	37528	0
38005	1	10068	1
29226	2	16563	0
37345	0	12847	1
18567	2	15689	0
37345	3	34059	1
5191	0	17320	0
37936	2	20271	1
18053	1	3810	0
37936	2	5195	1
9604	5	26281	0
36515	0	1898	1
3339	8	38040	0
38130	2	25805	1
28568	7	23566	0
37598	0	3113	1
22914	10	19117	0
37145	8	37383	1
10773	4	14154	0
37609	4	23903	1
29044	4	9840	0
37109	0	31363	1
37365	1	8281	0
37429	2	37187	1
38145	2	17320	0
36924	0	14810	1
36454	10	18195	0
37059	0	28682	1
16563	4	5124	0
38065	8	20695	1
1711	7	343	0
38065	5	18780	1
19093	7	21738	0
38065	5	35081	1
31798	6	18195	0
37667	2	26005	1
4000	2	37814	0
37190	2	5549	1
10578	0	15438	0
37190	2	18069	1
22047	6	31692	0
37748	0	2060	1
22914	6	1711	0
37748	6	36331	1
9794	6	18053	0
37634	2	9024	1
29226	6	2947	0
37655	6	31042	1
18053	0	37379	0
37371	4	37371	1
346	8	32058	0
36635	6	29654	1
5404	10	1149	0
37241	4	28335	1
12986	9	1711	0
36904	0	37497	1
10923	10	3810	0
36794	0	26288	1
9794	7	3339	0
36711	2	31747	1
343	2	17690	0
36711	2	27355	1
12725	10	9794	0
36502	0	31636	1
18053	4	36972	0
37530	4	38081	1
37365	9	11863	0
38055	3	10755	1
105	3	2947	0
36963	1	37784	1
35951	3	21738	0
36612	2	1646	1
5404	6	36620	0
36612	2	37230	1
25921	3	37912	0
36612	2	13556	1
36702	3	36454	0
37155	9	37919	1
9840	7	4891	0
37537	2	6960	1
6509	10	4891	0
37591	1	29429	1
3810	4	15802	0
36752	4	19859	1
9604	5	31904	0
36684	9	8113	1
517	8	11863	0
36684	9	13617	1
1711	3	19117	0
36684	9	37125	1
4319	4	28273	0
37418	5	14347	1
37299	9	14154	0
36474	3	5808	1
11863	3	25921	0
37385	5	31953	1
517	10	17690	0
37385	5	10127	1
8281	10	8623	0
36699	6	21744	1
5244	9	27640	0
37544	5	7397	1
7299	8	4000	0
36424	2	31979	1
38049	8	36516	0
36575	9	3604	1
21083	1	105	0
36575	9	22163	1
38049	8	25921	0
37888	3	37564	1
5576	2	15438	0
37265	0	24740	1
19093	6	8623	0
38119	0	28996	1
5124	1	4319	0
36840	5	23132	1
36471	10	36620	0
38031	4	36669	1
19117	8	3339	0
38031	5	20495	1
6509	5	12986	0
37535	8	21769	1
15689	3	31560	0
37315	5	12259	1
38040	5	11863	0
36590	0	12847	1
22914	6	4891	0
37579	0	12847	1
17320	3	31560	0
37567	0	23375	1
37528	2	5191	0
36530	2	22057	1
36702	4	32058	0
37669	3	38025	1
37365	3	2472	0
37115	4	33818	1
105	6	4000	0
37115	3	30954	1
11863	0	21738	0
37115	5	30981	1
27897	7	31692	0
37115	5	7828	1
21824	4	1149	0
37301	0	6454	1
23436	7	18567	0
38128	0	9557	1
22047	4	37911	0
36616	6	29740	1
3339	6	18311	0
36442	4	25951	1
4319	1	11863	0
37387	0	32217	1
7987	8	7299	0
36953	0	2809	1
38145	3	5404	0
38067	0	13873	1
343	1	27640	0
36997	2	7519	1
32058	7	10923	0
37958	2	37192	1
15689	1	16563	0
37958	2	13549	1
343	8	4000	0
37974	0	21858	1
5404	4	9604	0
36991	6	37836	1
18311	0	14609	0
36912	4	27211	1
36702	8	36972	0
36912	6	17868	1
29588	2	19093	0
36450	3	37436	1
13676	2	13874	0
36450	2	18945	1
346	8	5244	0
36450	9	3352	1
38040	7	37299	0
36777	2	31569	1
15689	1	3810	0
37089	3	10978	1
27640	5	4000	0
37695	2	21408	1
28568	8	5314	0
37695	2	11401	1
22047	1	21738	0
38135	2	16236	1
13874	9	14609	0
37167	9	3742	1
29226	2	10578	0
36475	0	5117	1
5576	2	4609	0
37871	6	7605	1
5314	10	23566	0
36872	0	3303	1
15438	1	36620	0
36872	2	25476	1
21824	4	36454	0
36872	2	16656	1
23566	5	12725	0
36872	2	32635	1
3810	1	5244	0
37756	0	21858	1
12999	9	12999	0
37334	0	27546	1
517	1	15802	0
37334	2	13584	1
29226	9	22914	0
37168	2	30788	1
22047	7	36702	0
38037	0	35856	1
27897	10	9604	0
37293	0	21858	1
38040	7	21824	0
36569	0	18455	1
13676	10	38145	0
37049	8	36531	1
27032	0	9840	0
37832	0	38036	1
36516	2	13874	0
37832	3	7911	1
31560	8	26281	0
37815	1	14804	1
13874	8	37299	0
37937	2	4213	1
3339	9	3810	0
37937	2	21081	1
12999	6	10532	0
37383	2	38053	1
3810	1	12986	0
37383	2	25052	1
18053	9	12725	0
37383	2	18446	1
27640	0	23436	0
37383	2	2374	1
2947	7	10578	0
37383	2	37145	1
9840	4	27897	0
37383	2	22065	1
27640	0	4000	0
37383	2	29784	1
36471	3	31560	0
37383	2	6599	1
5191	5	343	0
37383	2	24671	1
13676	8	18053	0
37383	2	19598	1
9840	9	14154	0
37383	2	32975	1
22914	9	105	0
37383	2	25449	1
17690	5	9794	0
37383	2	6489	1
35951	1	18053	0
37383	2	14752	1
13874	7	1711	0
37383	2	12417	1
4891	6	10532	0
37383	2	33492	1
8623	3	31692	0
37383	2	6496	1
4891	5	38145	0
36789	0	21858	1
5314	4	21738	0
36672	0	36497	1
10578	0	37365	0
37199	4	33177	1
5314	4	21613	0
37284	0	21858	1
37365	3	25921	0
37284	6	2338	1
21738	4	36471	0
37284	6	1572	1
28273	5	8281	0
36487	6	4134	1
36869	6	36620	0
36487	6	23862	1
1711	1	5314	0
36487	6	12437	1
36454	5	22914	0
36490	0	2293	1
12725	10	6509	0
36642	2	31835	1
37912	10	9794	0
36642	2	12698	1
25921	3	13676	0
36642	2	7713	1
3339	0	8041	0
37710	2	23707	1
19117	4	13874	0
37649	2	1408	1
37528	8	31560	0
37716	2	32210	1
27897	7	25921	0
37028	6	36862	1
23436	5	29588	0
37267	3	20389	1
19093	9	9840	0
36824	0	26857	1
17690	2	14609	0
37473	5	20325	1
343	3	343	0
36589	8	16346	1
14609	10	3810	0
37291	3	25051	1
32058	3	31560	0
38104	2	33517	1
12999	7	9604	0
37356	1	34276	1
10773	1	18053	0
37831	4	29789	1
12725	7	12986	0
37831	2	17546	1
17320	4	9794	0
37831	2	17077	1
25921	4	38040	0
37831	5	8492	1
36620	5	36702	0
37831	5	23346	1
18311	1	8623	0
36841	3	6986	1
37814	3	21738	0
36454	6	26412	1
18567	2	9794	0
37248	6	14442	1
36454	0	37379	0
37608	0	31363	1
31560	9	9604	0
37608	2	24337	1
28568	8	36516	0
36512	3	38011	1
9840	8	5244	0
36718	0	8666	1
13874	3	38040	0
37854	4	14826	1
10923	9	37365	0
37407	0	31462	1
14154	1	3339	0
37454	0	9258	1
16563	2	38145	0
36725	0	30255	1
7987	8	5404	0
36480	1	28032	1
15802	10	1711	0
37464	0	13800	1
13874	5	10923	0
37874	8	37467	1
4891	1	7987	0
38040	2	16310	1
38040	5	10578	0
37855	0	19436	1
4609	0	25921	0
36927	0	19527	1
13676	9	12999	0
36927	6	33317	1
23566	10	37692	0
36927	6	9914	1
4891	9	27032	0
37261	6	36512	1
18195	2	38145	0
37296	0	26005	1
1094	3	12999	0
37942	2	21013	1
17690	5	19117	0
37826	2	37826	1
27640	10	21083	0
36488	0	38153	1
37601	0	5191	0
37476	0	15004	1
4000	1	517	0
37586	4	6983	1
10923	0	4319	0
36958	6	7661	1
28568	6	346	0
36958	6	31351	1
343	0	8041	0
36640	0	9603	1
37814	2	31692	0
38114	2	27613	1
2947	0	37299	0
37014	2	16709	1
4609	6	21738	0
37448	0	24660	1
13874	8	8041	0
37448	2	11605	1
19093	4	18567	0
37286	6	20731	1
9840	3	17082	0
36533	2	12549	1
31904	1	38049	0
36533	2	36780	1
5244	2	12999	0
36533	2	35853	1
14609	9	2472	0
36533	2	29649	1
23566	9	18053	0
36533	5	18564	1
4891	4	28273	0
36533	2	16852	1
15438	10	18195	0
36775	0	19759	1
37601	6	7299	0
37761	2	10467	1
14609	6	4000	0
37761	2	1942	1
37528	10	3339	0
37069	0	14810	1
4319	0	38040	0
37680	6	28437	1
5314	5	37299	0
37680	6	26317	1
36454	4	7987	0
37680	6	21817	1
29760	0	28568	0
37680	6	34667	1
36471	0	27640	0
37282	5	12083	1
17320	8	38049	0
36483	6	12661	1
36516	3	12986	0
37546	4	7918	1
5124	7	29588	0
36853	0	19720	1
37814	5	4609	0
36785	3	31130	1
23436	8	38040	0
36637	4	1404	1
37814	3	4000	0
37353	0	9612	1
37911	8	23566	0
37497	0	19088	1
31798	5	8623	0
37083	2	19321	1
29044	0	37528	0
37083	2	29085	1
36972	2	1094	0
37083	2	7377	1
5124	1	37911	0
37083	2	36828	1
5244	9	29044	0
37083	2	33120	1
7987	1	36702	0
37083	2	37711	1
10578	9	17320	0
37083	2	36604	1
10773	2	15802	0
37083	2	3590	1
8281	5	1094	0
37083	2	35764	1
5244	0	29226	0
37083	2	10551	1
19093	0	26281	0
37952	0	15223	1
12725	6	36516	0
36729	2	1487	1
21738	10	5404	0
37768	3	16206	1
9604	2	37528	0
36835	9	3283	1
35951	8	18311	0
36835	9	16521	1
36516	0	38145	0
37797	5	2682	1
21613	3	19093	0
36778	2	24444	1
12986	7	37365	0
36781	2	1748	1
10773	1	4319	0
36781	2	19085	1
29044	9	37299	0
36781	2	38006	1
36972	2	15438	0
37023	0	24574	1
105	0	517	0
37453	8	36636	1
5191	10	13874	0
36992	3	1501	1
18053	0	22914	0
37593	0	19527	1
37299	5	19117	0
36446	2	15149	1
36620	6	17082	0
36611	2	14715	1
17320	5	5124	0
37260	2	10361	1
19093	2	19093	0
36700	3	23728	1
105	7	18567	0
36686	6	19073	1
15438	5	37912	0
37434	2	31751	1
21738	2	15802	0
37434	2	2411	1
37601	1	31798	0
38085	0	32555	1
37379	6	37379	0
36825	2	5616	1
343	6	23436	0
36825	2	28871	1
9794	10	4000	0
37019	8	32652	1
36972	5	5314	0
37019	5	4979	1
17690	2	5314	0
38072	0	23807	1
36471	2	27640	0
36574	0	10011	1
2472	6	38049	0
36574	3	37935	1
21613	4	10773	0
36597	6	12370	1
21613	10	36869	0
36597	6	26336	1
7987	3	2472	0
37576	0	2060	1
5191	1	15438	0
37576	3	30610	1
11863	5	35951	0
37004	2	10041	1
13874	4	14609	0
36989	4	36617	1
23566	2	28568	0
36989	5	36982	1
4319	4	5404	0
36989	5	36938	1
21738	6	38049	0
38015	4	16534	1
37814	10	18567	0
36791	5	574	1
29760	6	1711	0
37549	4	32349	1
23436	4	517	0
37549	5	14330	1
14298	6	38049	0
36546	5	37199	1
21824	0	4609	0
37122	2	28506	1
26281	5	25921	0
36852	2	33650	1
12999	5	17082	0
37438	2	28903	1
10532	4	105	0
37587	0	36660	1
5314	6	35951	0
36671	0	37216	1
18311	7	21083	0
36977	3	37261	1
37601	4	15438	0
36977	10	27084	1
517	0	17320	0
36977	5	26202	1
25921	4	9604	0
37057	0	36577	1
18195	5	29760	0
38137	0	14810	1
18311	8	517	0
36737	4	16515	1
36869	1	36702	0
38039	4	5702	1
37379	3	15689	0
37397	0	22429	1
36620	8	38145	0
37312	5	15207	1
38040	2	2472	0
37835	3	3641	1
31904	9	31904	0
37040	5	1716	1
1094	4	8041	0
36899	3	37706	1
12999	5	26281	0
37840	2	5601	1
4891	3	21083	0
37229	8	13853	1
36471	7	38040	0
37515	2	25199	1
22914	10	9840	0
37052	0	14639	1
18567	3	5191	0
37357	0	23693	1
5404	1	15438	0
37394	3	6493	1
9604	10	22047	0
37285	0	23621	1
5244	7	26281	0
38056	3	37817	1
18195	9	38040	0
37077	0	24684	1
37814	5	10578	0
37725	0	24045	1
9794	7	10923	0
37779	4	21016	1
31692	10	18567	0
37779	5	6870	1
18053	6	38040	0
36828	6	20076	1
21738	7	31798	0
37731	1	16794	1
29044	1	37379	0
37399	0	22010	1
10578	5	37528	0
37399	5	19861	1
3810	1	37912	0
36520	0	16379	1
38049	1	8623	0
37770	0	24877	1
3339	0	22914	0
36712	0	37992	1
5404	3	37299	0
37465	0	37433	1
27897	2	3810	0
36942	3	37489	1
37528	7	37692	0
37955	2	17774	1
18195	6	1149	0
36524	8	38043	1
4000	5	5576	0
36524	5	37349	1
13676	5	36471	0
38091	2	17742	1
10773	6	31904	0
38091	2	10734	1
36972	8	26281	0
36485	2	19270	1
105	5	29044	0
36485	2	12548	1
8041	5	4000	0
37737	0	33950	1
16563	10	5191	0
36705	3	2278	1
12725	5	27032	0
37842	2	17584	1
14154	9	5576	0
36604	3	7847	1
36972	8	4891	0
38016	1	20653	1
4891	5	28568	0
37446	2	9781	1
5314	3	37365	0
37446	2	7928	1
14609	3	5244	0
37852	0	10011	1
22914	8	2947	0
37331	3	37775	1
37814	8	36471	0
37331	6	36452	1
7987	10	7987	0
37331	6	31005	1
37814	2	5124	0
37331	6	16838	1
517	1	5314	0
37457	0	4595	1
4319	2	13676	0
37653	0	8832	1
3810	9	31560	0
37339	0	9798	1
36471	3	21824	0
38096	2	15132	1
1094	10	12725	0
37123	0	19527	1
16563	9	31692	0
37821	3	37197	1
31692	2	37601	0
36738	3	24708	1
37912	8	5576	0
36436	5	822	1
5576	1	346	0
36436	5	9243	1
14298	2	37601	0
36910	0	2060	1
37911	0	12986	0
36507	2	33677	1
27897	3	36516	0
37299	2	22064	1
12725	5	4891	0
37506	8	20695	1
517	0	3339	0
37506	5	35081	1
37692	0	38145	0
37506	5	30481	1
27897	3	9604	0
37850	2	34198	1
31692	7	28273	0
37439	5	22268	1
5124	10	18567	0
37439	5	35784	1
9794	1	21083	0
37697	0	28440	1
9840	3	8041	0
36567	2	15695	1
5124	1	6509	0
37810	3	2928	1
36471	7	17320	0
37886	5	4977	1
10578	2	22047	0
38147	3	23547	1
4000	5	38040	0
37523	6	22072	1
5404	4	9604	0
36566	0	27507	1
15438	10	36516	0
36439	3	22422	1
5314	6	17690	0
36439	6	19880	1
15689	1	22914	0
37358	0	13401	1
37911	0	517	0
36522	3	24596	1
1094	7	36471	0
36522	6	27945	1
21824	5	14154	0
36522	6	2152	1
29588	10	1149	0
37509	6	37351	1
18567	9	19117	0
37509	6	34995	1
346	6	25921	0
37423	0	36507	1
15802	5	14298	0
37631	3	2332	1
18567	8	343	0
36677	2	37850	1
28273	0	28273	0
38071	2	24748	1
1094	6	19093	0
38071	2	36274	1
27640	1	36454	0
36693	6	19584	1
517	5	12986	0
36693	6	15210	1
6509	8	1094	0
37367	0	21733	1
17690	9	17320	0
37367	2	18044	1
21613	2	38040	0
37367	2	13064	1
36620	2	37911	0
36459	3	36493	1
9840	5	21738	0
37753	2	12354	1
28273	2	35951	0
37460	2	36632	1
37814	3	21613	0
36497	2	37763	1
29588	8	8041	0
38118	2	6846	1
37601	8	11863	0
36664	2	32703	1
36702	9	17690	0
37908	0	5664	1
9794	6	10532	0
37402	6	36056	1
14154	3	29044	0
37223	3	4313	1
16563	5	2472	0
37195	0	37083	1
2472	9	22914	0
37382	3	605	1
16563	10	37814	0
37665	6	28346	1
25921	10	5314	0
36476	4	36826	1
17690	8	7987	0
36889	4	22206	1
36702	10	17082	0
36809	2	15412	1
36620	3	2947	0
36809	2	13115	1
38049	5	1094	0
36743	5	32485	1
14298	5	11863	0
36444	2	11719	1
2472	5	21824	0
37410	0	26488	1
14154	6	5314	0
37548	3	37563	1
18195	9	517	0
36644	2	16221	1
15438	1	517	0
36644	2	37444	1
6509	8	4891	0
36644	2	13750	1
10773	0	3810	0
37058	0	896	1
36869	2	16563	0
36707	0	732	1
18311	8	16563	0
36900	2	3852	1
23566	6	517	0
37421	3	37388	1
18053	9	7987	0
37788	0	1474	1
8041	5	27897	0
37466	5	35237	1
10923	4	37814	0
37466	5	14136	1
19117	9	38145	0
37466	10	4360	1
18311	7	4891	0
38007	3	26596	1
38145	9	37365	0
37055	0	24789	1
37814	9	21083	0
37305	0	14639	1
19093	9	36869	0
36532	0	8462	1
37912	8	12986	0
37664	0	19754	1
517	6	32058	0
37913	4	22131	1
9794	7	18053	0
36864	0	37407	1
8281	7	21083	0
37440	0	24854	1
36471	0	16563	0
37440	5	20648	1
21613	8	31904	0
37498	0	13647	1
343	8	5191	0
37498	0	36254	1
14609	8	1094	0
38019	6	26709	1
14298	9	16563	0
37750	6	35059	1
14609	8	3339	0
38048	2	10773	1
37528	9	38049	0
37999	2	36497	1
29588	5	10578	0
37999	2	23508	1
26281	2	1094	0
37999	2	19004	1
27640	3	31904	0
37705	2	23076	1
37692	8	38040	0
37688	0	5293	1
18567	2	37814	0
37688	2	33765	1
18195	3	5124	0
37688	2	32159	1
37299	2	27032	0
37688	2	26545	1
18053	6	29588	0
37688	2	25965	1
15689	4	36702	0
37688	2	35977	1
5244	9	31692	0
37349	5	18363	1
5191	0	17690	0
37349	5	19446	1
5576	10	7987	0
37349	5	32192	1
18053	8	22047	0
37349	5	26238	1
19093	2	5404	0
37268	0	10574	1
343	3	37912	0
37222	2	17016	1
1711	7	36972	0
37222	2	36420	1
4319	8	10923	0
37411	6	5690	1
21738	3	36702	0
36646	3	23728	1
4609	2	18567	0
36435	5	20508	1
10532	3	14154	0
37414	1	15712	1
21824	7	14298	0
37573	3	7730	1
12986	9	31560	0
36618	0	15335	1
37379	4	13676	0
37202	0	38036	1
18053	1	36516	0
36433	0	23113	1
37814	1	21083	0
36433	9	15707	1
2472	10	18311	0
36433	9	14965	1
21613	6	36972	0
37275	0	24897	1
29588	4	4891	0
38045	5	18544	1
18195	3	15438	0
38045	5	37021	1
27640	2	36972	0
38045	5	8705	1
5404	10	21613	0
36861	2	10782	1
1711	0	8041	0
36861	2	16287	1
23436	9	10773	0
37916	0	17220	1
23566	2	13874	0
37712	6	17869	1
8623	4	2947	0
36649	2	17915	1
17320	8	8623	0
36716	5	22200	1
2472	5	16563	0
37773	2	15032	1
31560	0	7987	0
37210	4	18196	1
12999	6	10923	0
36826	5	2883	1
13874	8	18311	0
36826	5	34705	1
22047	8	5314	0
36826	10	19007	1
6509	0	10773	0
36928	0	36903	1
4609	4	14609	0
37494	0	10626	1
18195	9	4000	0
36917	0	21376	1
27032	1	5314	0
36917	2	21988	1
18311	6	10578	0
36995	0	26132	1
1094	4	346	0
36950	0	7858	1
29226	3	5244	0
37297	0	27656	1
37601	7	5314	0
37707	3	23728	1
37379	10	3339	0
36587	5	27014	1
36454	6	9840	0
37504	6	10555	1
346	10	19117	0
38051	0	38017	1
36454	5	10773	0
38051	2	2983	1
346	10	5576	0
37658	3	754	1
38049	3	25921	0
38103	0	28418	1
37528	4	8281	0
38103	2	2072	1
31692	10	31798	0
37352	0	27546	1
346	0	14609	0
37510	3	36506	1
36620	8	5576	0
36726	1	36648	1
517	10	21083	0
38105	0	35344	1
4609	1	5124	0
38105	2	32356	1
23436	10	3810	0
37193	3	38149	1
36972	3	32058	0
37677	3	34466	1
29760	9	21738	0
36537	0	2371	1
17082	1	3339	0
37012	8	38135	1
19117	9	9840	0
36489	0	36024	1
23566	6	4891	0
36832	0	13830	1
18053	1	37299	0
36832	3	7730	1
36702	1	19117	0
37723	0	23731	1
10773	5	14609	0
37723	4	22777	1
38145	7	18311	0
36550	0	36531	1
37528	4	38145	0
36761	2	15969	1
22914	10	3810	0
37239	2	24197	1
4891	0	37911	0
37239	5	30000	1
5124	8	12725	0
37636	0	14228	1
36869	2	29760	0
37279	1	23431	1
8041	6	36516	0
37800	4	9976	1
1149	1	32058	0
37847	0	22328	1
14609	0	346	0
38107	0	37417	1
23566	8	37528	0
37217	2	4182	1
36454	9	8281	0
37976	0	8808	1
36471	0	21824	0
36923	4	25820	1
14298	3	23566	0
37959	0	791	1
15802	1	12986	0
36561	0	12847	1
4000	8	14298	0
37553	2	30011	1
5314	4	8041	0
36833	0	35231	1
38040	5	14609	0
37857	0	6454	1
11863	6	27640	0
37078	0	5329	1
37912	10	8281	0
37078	3	11893	1
36620	7	37299	0
37143	0	3636	1
18311	7	8281	0
37595	1	13127	1
1094	0	10532	0
37080	0	36497	1
14609	8	4319	0
36876	0	18521	1
26281	2	3339	0
37302	5	16105	1
1149	5	15689	0
37157	1	7205	1
36702	0	36869	0
37108	0	7214	1
14154	1	11863	0
37396	6	21392	1
105	8	5191	0
36526	2	8265	1
4891	1	15438	0
36526	2	1087	1
18311	5	37365	0
37362	0	10484	1
10923	5	6509	0
38022	0	24834	1
29760	3	17690	0
36549	6	15215	1
29588	2	4891	0
38029	2	35252	1
38040	8	12999	0
37132	0	37347	1
9794	10	27897	0
37132	1	16794	1
2947	8	17690	0
36568	0	12760	1
1149	1	27032	0
37224	4	36552	1
5576	2	27897	0
37948	0	4251	1
32058	1	1711	0
37948	6	32706	1
5191	1	14298	0
36871	0	15826	1
22914	6	22914	0
36479	3	34007	1
17690	4	14154	0
38077	3	36929	1
8041	1	19093	0
38077	6	36493	1
21613	3	6509	0
38144	2	18398	1
21613	10	1711	0
38144	9	7584	1
18567	0	17690	0
38144	9	8265	1
21824	9	5191	0
38144	9	8635	1
37299	1	22047	0
36667	2	14986	1
18195	1	36516	0
36667	2	26724	1
15689	7	11863	0
38011	6	37428	1
5404	6	28273	0
38011	6	25693	1
7987	1	37379	0
36808	0	30635	1
37814	5	21613	0
37846	2	8320	1
36869	9	8281	0
37034	2	5749	1
7987	3	1149	0
36838	0	21578	1
19117	2	36869	0
36838	2	27803	1
31560	2	21613	0
36810	0	12847	1
35951	0	21613	0
37967	4	36780	1
18311	7	18053	0
37536	0	37168	1
5191	6	10923	0
36652	2	28443	1
36620	5	19117	0
37088	1	23431	1
9794	1	12986	0
37220	8	25879	1
27032	6	4000	0
37360	0	36749	1
21613	0	10773	0
36603	0	16897	1
9794	7	37912	0
37134	5	32870	1
4000	1	37911	0
37134	5	13926	1
18053	8	36454	0
37134	5	10858	1
23566	7	36471	0
36692	0	27726	1
38145	1	18567	0
36692	3	27880	1
38145	4	8041	0
37093	2	36305	1
37692	4	21824	0
37769	8	32652	1
37601	6	37692	0
37769	4	36826	1
13874	2	12725	0
37447	0	19720	1
18195	3	14609	0
37447	2	28216	1
105	10	37365	0
37447	2	34865	1
25921	3	5191	0
36591	4	33064	1
37911	1	23566	0
36998	4	16267	1
36869	0	5244	0
36998	9	36074	1
2472	9	105	0
38109	2	28566	1
21083	4	15438	0
38116	5	3190	1
27640	7	29588	0
38116	5	9057	1
21083	10	5576	0
36768	0	14611	1
37365	6	5404	0
37000	1	16794	1
28568	9	17082	0
37765	2	32448	1
15802	2	9794	0
37734	2	5800	1
17320	0	4000	0
37526	3	37706	1
346	0	7987	0
37485	0	37035	1
2947	7	17690	0
38017	2	38051	1
22047	0	28568	0
38006	2	19550	1
2947	5	13874	0
38006	2	32820	1
37299	6	31692	0
36624	6	32674	1
31692	0	28568	0
37589	0	18922	1
37299	10	36869	0
37377	3	37848	1
37299	8	35951	0
37844	8	25354	1
12999	5	14298	0
37659	4	7083	1
37365	7	5404	0
37905	0	15443	1
5314	4	37379	0
37158	8	21977	1
27640	5	8041	0
38132	2	13926	1
37528	6	15689	0
38133	9	18121	1
7987	8	37299	0
36585	6	8127	1
37365	3	346	0
36658	3	11609	1
36471	3	9794	0
37792	0	3554	1
37299	6	38145	0
36758	6	29963	1
5314	2	38145	0
36770	2	33044	1
517	2	4000	0
36786	3	36869	1
37365	5	25921	0
36534	0	32555	1
10773	5	35951	0
36990	3	26928	1
38040	3	343	0
36975	0	37936	1
25921	4	38049	0
36498	2	25230	1
5404	1	10578	0
38098	0	17292	1
21824	8	9794	0
36441	0	35770	1
36620	7	5124	0
37068	4	33818	1
4891	3	29044	0
37068	5	36994	1
21083	5	6509	0
37068	5	5670	1
37911	4	15438	0
37068	5	36523	1
13676	0	36702	0
37066	1	10068	1
31692	1	5576	0
38153	0	20685	1
36869	7	29226	0
36698	0	19527	1
4319	8	18195	0
37115	3	10863	1
21613	1	15802	0
37620	1	1590	1
5124	6	16563	0
37729	2	36518	1
31692	10	5191	0
36494	0	10309	1
37814	0	36972	0
37163	0	13830	1
15438	6	346	0
36812	0	37083	1
12986	5	28273	0
37442	9	11718	1
27640	7	18567	0
37442	9	615	1
35951	2	37912	0
37698	3	6021	1
15438	4	21738	0
36819	5	7708	1
16563	1	9604	0
37467	0	14874	1
38145	6	346	0
37914	0	36024	1
27640	10	36454	0
36491	0	8588	1
4891	6	37692	0
37639	0	9557	1
29760	10	12986	0
37639	6	30608	1
31904	9	35951	0
37639	6	16023	1
21613	9	14298	0
36581	3	31537	1
3810	6	19117	0
36606	3	23214	1
13676	0	12725	0
37657	6	27726	1
105	2	31798	0
37657	6	37848	1
5124	2	21083	0
36932	0	18455	1
3339	8	9794	0
36805	0	37802	1
19093	1	8623	0
36727	4	30693	1
5124	7	17690	0
37633	5	32915	1
9794	0	21824	0
36499	5	4748	1
23436	7	19117	0
38123	0	11068	1
4319	3	38040	0
37221	2	29605	1
1149	8	27640	0
36601	6	26924	1
346	5	5314	0
37841	6	35326	1
17320	2	11863	0
37979	6	37543	1
2947	10	29226	0
37794	5	36717	1
35951	2	18311	0
37391	0	23149	1
36972	10	4891	0
37036	0	30150	1
517	8	31560	0
37818	0	9615	1
27897	2	36471	0
36831	0	1484	1
37911	0	18053	0
37298	4	14467	1
29760	1	17082	0
37298	4	31988	1
36516	5	7987	0
37610	0	14810	1
29226	10	21824	0
37610	3	29805	1
38145	8	5314	0
36668	6	26852	1
17082	9	37911	0
37044	6	37036	1
13676	9	5244	0
37375	0	36763	1
6509	0	21824	0
37225	0	21774	1
37379	1	31692	0
37225	2	23154	1
14609	8	8281	0
36622	0	37994	1
21824	10	7987	0
36622	2	17612	1
21738	10	27032	0
37623	2	12004	1
29226	1	37379	0
36784	2	27190	1
10532	8	37814	0
37514	0	21858	1
37528	10	5576	0
37209	0	16611	1
5576	10	2472	0
37807	0	19041	1
37365	5	31798	0
37441	3	29805	1
23436	6	2947	0
37320	3	21949	1
9840	3	15438	0
37320	2	27714	1
37814	5	28568	0
37320	2	19776	1
16563	2	37299	0
37320	2	32933	1
105	4	29044	0
37320	2	3790	1
105	1	18311	0
37320	2	33906	1
25921	5	28568	0
37373	0	19527	1
4319	10	21824	0
37373	6	25892	1
17690	5	23566	0
37580	2	35180	1
18195	2	22914	0
37484	3	30512	1
27897	6	105	0
37484	6	721	1
6509	6	5314	0
37484	6	19156	1
1094	6	10923	0
37484	6	14138	1
37911	9	9840	0
37484	6	20474	1
3339	8	26281	0
37829	0	19542	1
36516	7	28273	0
37016	0	21235	1
38049	9	14154	0
38033	2	8872	1
29044	0	5124	0
37262	5	23911	1
17690	6	6509	0
36983	8	19794	1
37911	10	28273	0
37572	4	37572	1
36516	5	18053	0
36750	0	37704	1
7987	6	10578	0
36750	4	1202	1
21738	3	38049	0
36493	3	38077	1
15689	5	23566	0
36501	2	37773	1
16563	4	17320	0
38156	3	3787	1
36620	0	36454	0
37660	3	28746	1
27032	4	37365	0
38002	2	36275	1
343	8	21824	0
37726	3	13142	1
36516	10	38145	0
38080	3	28421	1
10773	5	2472	0
38080	5	38080	1
29588	6	37379	0
36971	1	16794	1
28273	2	5191	0
37086	0	13282	1
14154	0	19117	0
38120	3	18100	1
29226	1	14609	0
38120	2	26669	1
13676	4	3339	0
38113	2	15795	1
36702	4	31904	0
37795	6	8230	1
10578	3	517	0
37772	3	14179	1
18053	4	517	0
36925	3	20791	1
19093	9	36620	0
36925	6	32953	1
38049	6	37601	0
37893	2	5107	1
29044	7	29226	0
37893	2	2655	1
21613	6	18195	0
36615	2	10856	1
105	4	7299	0
36615	2	15099	1
26281	5	5576	0
38148	2	19518	1
37692	7	5124	0
38148	2	33803	1
38049	6	12999	0
36513	0	36774	1
9604	6	36471	0
37926	2	16639	1
18567	1	22047	0
37926	2	5492	1
5191	6	38040	0
37038	4	30581	1
31904	5	14298	0
37341	4	37132	1
28273	4	17082	0
37067	3	29884	1
1094	7	5124	0
36607	2	30911	1
37911	5	3339	0
36746	3	1909	1
10578	6	18195	0
37428	5	21487	1
13676	10	37912	0
37798	6	35388	1
29588	10	7987	0
37849	8	2647	1
38040	8	5191	0
37849	5	10566	1
17082	10	27897	0
37749	0	17140	1
5191	1	27032	0
37749	1	15712	1
29044	0	13676	0
37920	3	10677	1
31560	3	10773	0
36842	2	28253	1
38049	9	19093	0
37583	2	30383	1
29044	5	4609	0
37547	0	2509	1
31560	4	25921	0
36470	0	21245	1
7987	8	37528	0
36634	0	11068	1
21738	8	12999	0
38046	0	31462	1
38049	4	18567	0
38046	2	18409	1
8623	7	27897	0
37906	0	32677	1
5314	7	17320	0
37507	3	37706	1
14298	5	17320	0
38111	0	30693	1
38145	7	25921	0
36793	0	36498	1
15802	8	31904	0
37550	0	29491	1
37692	9	7299	0
37395	2	29233	1
27032	10	17320	0
37403	2	37627	1
2947	5	32058	0
38154	3	14149	1
37692	8	35951	0
37640	3	20397	1
37814	4	26281	0
36579	2	35580	1
1711	4	4319	0
36636	2	1979	1
7299	10	19093	0
36636	2	247	1
36471	3	19093	0
36636	2	33778	1
28568	5	5124	0
36636	2	37701	1
14609	8	21613	0
36636	2	21500	1
4319	5	37365	0
36636	2	8482	1
5404	6	38049	0
36636	2	2998	1
10578	4	4891	0
36636	2	34523	1
1711	7	37528	0
36636	2	5415	1
5404	0	15802	0
37405	1	37621	1
17082	10	38049	0
38062	0	30698	1
19117	8	10532	0
37184	5	8935	1
343	3	13874	0
37525	0	36024	1
10578	1	6509	0
37897	0	2392	1
12725	4	31904	0
36655	5	25470	1
105	3	37692	0
38092	0	32555	1
22914	0	13874	0
38092	3	23728	1
5191	5	11863	0
37333	3	37372	1
37692	7	2472	0
37333	2	20171	1
21824	2	37814	0
36799	3	4248	1
2947	5	36869	0
38000	2	1057	1
27640	8	2947	0
37931	4	31359	1
8281	5	5191	0
36879	0	28844	1
4000	0	15802	0
36715	2	37774	1
12725	1	36972	0
36697	0	37734	1
21738	0	14298	0
37882	4	2852	1
14298	7	38145	0
37882	2	35695	1
1711	7	10578	0
37501	8	37383	1
37601	10	12725	0
37274	5	1467	1
12986	5	5576	0
37274	5	14628	1
27640	7	19093	0
37554	4	5419	1
29044	10	32058	0
37324	0	37335	1
4609	6	25921	0
38030	3	11609	1
28568	3	8041	0
38030	6	7121	1
29044	1	12999	0
36471	0	27242	1
4891	10	37601	0
36471	2	17980	1
13874	2	37911	0
36471	2	37236	1
5244	1	1149	0
37746	6	27984	1
27897	4	36972	0
37746	6	28250	1
15689	10	36516	0
37746	6	11720	1
36516	5	4319	0
37925	0	36325	1
21738	2	36702	0
37470	3	5074	1
4891	10	10578	0
37470	2	9324	1
8623	2	15438	0
36663	4	263	1
4609	0	22914	0
36753	6	31296	1
1094	5	18567	0
37727	2	20940	1
15689	6	37299	0
37727	2	16166	1
517	7	7987	0
37752	2	3746	1
37692	1	37911	0
37273	3	37435	1
2947	2	15438	0
37273	6	17110	1
17320	2	5576	0
36862	0	24877	1
36454	3	28273	0
36862	3	37028	1
2947	9	27897	0
37561	0	35756	1
18567	5	6509	0
37056	8	36131	1
37528	6	36454	0
37056	8	9093	1
27897	7	14154	0
36806	0	27068	1
12986	1	36702	0
36806	2	20338	1
31798	0	37379	0
37126	3	31912	1
9604	9	23566	0
36648	9	5106	1
10773	3	1711	0
36648	9	5337	1
14298	8	1149	0
36648	9	4998	1
2472	7	18567	0
36648	9	9710	1
5404	9	17082	0
36648	9	7589	1
36516	2	22047	0
36648	9	18576	1
37911	7	12986	0
36648	9	29747	1
10923	7	23566	0
36648	9	7804	1
19093	9	17690	0
36648	9	7316	1
36620	7	1149	0
36648	9	14445	1
36471	4	36972	0
36648	9	21511	1
31560	8	21613	0
36648	9	29711	1
21613	0	37912	0
36648	9	503	1
5576	3	38145	0
36648	9	23812	1
343	5	346	0
36648	9	29237	1
27032	2	12725	0
36648	9	38027	1
18053	4	10532	0
36648	9	36472	1
10773	1	36471	0
36648	9	4558	1
25921	0	29588	0
36648	9	8233	1
5191	1	5576	0
36648	9	22755	1
10923	9	36454	0
36648	9	36726	1
8041	0	18567	0
36648	9	12418	1
37365	7	19117	0
36648	9	24148	1
5244	8	14298	0
36648	9	26493	1
7987	5	21824	0
36648	9	811	1
37601	4	36972	0
36648	9	17232	1
37365	1	343	0
36648	9	4239	1
4609	3	32058	0
36648	9	10008	1
31560	2	3339	0
37317	0	3113	1
27032	10	9840	0
37251	5	21966	1
2947	9	29760	0
37251	5	3395	1
9840	0	7987	0
37752	2	32698	1
13676	7	37912	0
38082	0	10734	1
5124	0	37814	0
36874	0	22118	1
5124	9	37911	0
36874	4	35725	1
21083	10	36972	0
37834	0	25507	1
517	10	4000	0
36756	0	31241	1
19093	8	16563	0
36660	2	37587	1
29044	8	7987	0
37592	0	12901	1
5124	10	38145	0
38004	3	6705	1
37912	1	31798	0
36800	6	11398	1
29588	0	4609	0
36432	0	36205	1
12999	0	37528	0
36744	0	38107	1
10532	2	37299	0
37070	4	24009	1
23566	10	31560	0
37070	2	36940	1
36620	3	13874	0
37596	8	38048	1
37299	1	31692	0
37596	4	15236	1
9794	1	37912	0
37885	0	9603	1
8281	6	21613	0
37885	6	36597	1
14154	6	36869	0
36926	0	17722	1
27640	1	4000	0
38122	0	24740	1
14298	1	18195	0
36736	2	30920	1
4609	4	6509	0
36505	0	32478	1
36454	9	27032	0
36505	3	37388	1
28568	9	17320	0
37560	2	14713	1
36471	5	12725	0
37560	2	11977	1
1711	9	36702	0
37529	2	37590	1
6509	8	5314	0
37529	2	30958	1
28568	6	37912	0
37443	1	35124	1
29044	4	5404	0
37045	3	36487	1
3810	4	27640	0
37045	6	1188	1
4000	2	22914	0
38068	0	11340	1
16563	1	5314	0
38068	3	29025	1
22914	0	13676	0
38081	0	13853	1
27032	10	5191	0
38081	5	37530	1
31798	8	38049	0
37029	0	31112	1
5404	0	25921	0
37029	3	37024	1
18311	7	5244	0
37743	4	3672	1
18053	8	1711	0
37896	0	19527	1
27897	6	29226	0
37896	6	4354	1
23566	2	3339	0
36868	0	5614	1
36516	10	18195	0
36563	5	38009	1
29226	4	17082	0
36517	4	27950	1
27032	9	346	0
37870	0	29157	1
18567	1	36471	0
[truncated: 2,862 more rows]
