# Supplementary material
Source: ML conference proceedings conference paper supplement (https://proceedings.neurips.cc/paper_files/paper/2021/hash/0fd600c953cde8121262e322ef09f70e-Abstract.html)
Supplement: Supplementary file 1 [file 0fd600c953cde8121262e322ef09f70e-Supplemental.zip › Supplementary_Material_Paper_8745/data/Hamaguchi-BM_head-5000/test/test-random-sample/test3.txt]

38038	0	13590	1
28045	8	14747	0
37961	2	21629	1
37589	2	26486	0
37786	2	21674	1
36831	1	30294	0
37125	0	9144	1
28273	6	1149	0
37706	6	33781	1
36516	4	1149	0
37706	6	4066	1
5314	7	17320	0
37706	2	2163	1
14780	7	36988	0
37706	6	34609	1
14747	3	28045	0
37706	6	16086	1
21681	6	33027	0
37706	6	3596	1
19407	4	25247	0
37706	6	33602	1
8281	3	29044	0
37706	6	30633	1
34846	5	30070	0
37706	6	31350	1
23339	6	28956	0
37732	8	21977	1
36852	9	8900	0
36920	0	18455	1
2323	4	4025	0
36920	6	30072	1
33317	8	2019	0
37431	0	21858	1
5314	1	15689	0
37431	3	5512	1
31144	7	22370	0
36503	9	19295	1
36861	5	14973	0
36452	6	23095	1
37406	5	16902	0
37256	6	32897	1
24578	0	4300	0
37175	0	1494	1
25596	7	22196	0
37995	0	38058	1
26844	4	18306	0
37995	2	19334	1
18270	5	4372	0
36617	5	36348	1
9037	7	19326	0
36617	5	37969	1
37528	10	4000	0
36617	5	3479	1
11065	1	5324	0
36617	5	37281	1
31798	7	27032	0
37683	4	8226	1
4973	5	6122	0
37740	1	27492	1
28956	0	501	0
36559	4	3873	1
3810	8	13676	0
37452	3	37746	1
9840	9	9840	0
37490	0	38106	1
31239	0	13802	0
36883	2	5309	1
21738	1	22047	0
36760	2	28698	1
25185	1	32876	0
36760	2	15844	1
37866	0	18270	0
37527	1	38144	1
20135	4	2964	0
37408	0	22280	1
25360	7	9037	0
37408	2	19626	1
13434	3	9037	0
37408	2	23911	1
30197	2	31582	0
37718	0	11318	1
22050	7	6169	0
37487	5	10055	1
29152	4	4966	0
37412	4	34985	1
16856	10	7211	0
37820	1	2195	1
19161	0	14002	0
36614	3	13925	1
10134	3	31606	0
38095	9	20539	1
25572	9	13675	0
38095	9	20083	1
6545	7	21681	0
37676	0	12847	1
4891	10	4891	0
36552	5	7602	1
19232	6	6716	0
36552	5	6623	1
33027	6	2725	0
37351	0	23693	1
26486	3	9252	0
37351	3	37509	1
16856	1	1897	0
37351	6	20995	1
36608	2	2725	0
36795	1	6886	1
34730	3	25578	0
36690	0	36504	1
21662	1	32876	0
38078	6	4844	1
8545	10	14604	0
36495	2	10254	1
7987	8	27897	0
36495	2	37611	1
31606	7	27817	0
36495	2	38140	1
21738	7	12986	0
36495	2	12686	1
18804	1	33248	0
36495	2	4171	1
23693	2	26844	0
36495	2	30916	1
37724	0	24398	0
36495	2	11884	1
6920	9	37875	0
37996	0	32555	1
11742	10	25257	0
37663	1	26796	1
27802	10	3197	0
37475	2	20536	1
37786	1	31239	0
36632	2	27167	1
11925	3	19326	0
37144	3	1033	1
25921	1	10923	0
37099	6	13451	1
10887	7	27497	0
37099	6	37402	1
4609	5	13676	0
37099	6	7680	1
32905	10	25484	0
37099	6	7730	1
4319	9	3810	0
37099	6	26613	1
27497	3	4095	0
37868	0	11719	1
20978	7	37589	0
37278	0	26360	1
19326	4	23843	0
36966	2	36580	1
11824	8	18009	0
37899	3	4039	1
10920	3	37004	0
37458	0	38036	1
161	10	7999	0
36678	6	36965	1
14554	4	8900	0
38042	2	29551	1
10813	9	27255	0
36817	2	34279	1
3339	0	25921	0
36817	2	11428	1
27855	2	19426	0
36817	2	32167	1
33027	6	26526	0
36817	2	27904	1
28273	6	37299	0
36817	2	36780	1
10923	1	17082	0
37424	2	10914	1
26764	2	25578	0
38142	2	16206	1
18266	10	20235	0
37962	0	1494	1
24438	4	31989	0
36898	3	7692	1
4319	7	343	0
37469	3	37715	1
11065	5	10134	0
37340	0	37465	1
6920	9	24578	0
37187	2	24954	1
1897	2	37482	0
36869	3	27796	1
14437	2	13190	0
36869	6	15409	1
38145	5	4891	0
36869	6	31981	1
27855	10	26486	0
36869	6	13404	1
36861	0	22050	0
36869	6	16754	1
10923	1	15802	0
36869	6	23520	1
19347	4	38128	0
36869	6	26232	1
15650	6	36632	0
36869	6	16304	1
36552	7	27840	0
36869	6	32400	1
36218	5	33317	0
36869	6	19036	1
1149	4	36869	0
36869	6	258	1
11925	6	2725	0
37877	0	10011	1
33719	4	16793	0
36804	2	18529	1
27802	6	10463	0
36555	0	19527	1
30825	10	26526	0
36731	0	36325	1
31856	8	36861	0
36731	3	27635	1
14298	4	36972	0
36610	0	37417	1
24747	8	19407	0
37164	0	11068	1
34974	1	35921	0
38024	6	5783	1
37004	4	26750	0
36930	4	36617	1
27855	0	501	0
36887	5	11430	1
346	8	38049	0
36887	9	13402	1
22196	0	27855	0
36792	2	23735	1
19052	4	25185	0
36792	2	16473	1
31239	0	21662	0
36696	3	11628	1
13190	8	24556	0
37721	0	18977	1
2524	10	14604	0
37721	1	25201	1
15870	8	1549	0
36734	2	7578	1
20135	4	7275	0
38013	5	25160	1
30294	1	19347	0
36984	4	22206	1
11742	6	4811	0
36823	2	21925	1
31989	0	3897	0
36675	6	35645	1
15075	10	8296	0
36675	6	24081	1
13948	5	4300	0
37182	4	18196	1
36831	4	13485	0
37314	0	14810	1
30825	10	37004	0
37939	1	5235	1
3810	2	1149	0
37571	3	37755	1
37875	9	1549	0
37084	0	4944	1
25572	5	16196	0
36757	0	36711	1
14780	5	17625	0
37520	0	28714	1
37786	8	5495	0
36639	4	1401	1
37050	3	18306	0
36993	6	19453	1
26764	2	37406	0
38066	3	34899	1
27802	7	30387	0
37148	0	25641	1
5093	9	4300	0
37374	0	37899	1
9037	10	1861	0
38005	8	29602	1
288	6	5495	0
38005	1	10068	1
23566	4	15438	0
37345	0	12847	1
10532	0	36471	0
37345	3	34059	1
6141	6	25484	0
37936	2	20271	1
9107	0	37886	0
37936	2	5195	1
36118	8	37482	0
36515	0	1898	1
9252	9	4746	0
38130	2	25805	1
16793	6	29198	0
37598	0	3113	1
14554	9	37873	0
37145	8	37383	1
11782	2	27497	0
37609	4	23903	1
31582	8	31760	0
37109	0	31363	1
14002	3	25742	0
37429	2	37187	1
21613	9	21824	0
36924	0	14810	1
422	5	16022	0
37059	0	28682	1
2947	5	15438	0
38065	8	20695	1
16022	8	10516	0
38065	5	18780	1
14437	2	31283	0
38065	5	35081	1
2019	9	31381	0
37667	2	26005	1
37601	10	26281	0
37190	2	5549	1
27912	9	4025	0
37190	2	18069	1
32905	9	14647	0
37748	0	2060	1
21376	6	5093	0
37748	6	36331	1
3339	6	10923	0
37634	2	9024	1
25596	10	11648	0
37655	6	31042	1
36852	0	15980	0
37371	4	37371	1
9107	4	11065	0
36635	6	29654	1
22050	0	35921	0
37241	4	28335	1
23843	10	33027	0
36904	0	37497	1
16902	10	30552	0
36794	0	26288	1
32876	4	4300	0
36711	2	31747	1
2725	9	35514	0
36711	2	27355	1
15986	2	27255	0
36502	0	31636	1
21824	5	27032	0
37530	4	38081	1
1149	0	1711	0
38055	3	10755	1
22047	6	9794	0
36963	1	37784	1
37601	8	29226	0
36612	2	1646	1
13434	9	36988	0
36612	2	37230	1
10134	1	3349	0
36612	2	13556	1
13591	5	15075	0
37155	9	37919	1
3897	9	16728	0
37537	2	6960	1
10887	10	6101	0
37591	1	29429	1
13948	8	13802	0
36752	4	19859	1
24796	0	15689	0
36684	9	8113	1
2465	10	2465	0
36684	9	13617	1
17017	5	37916	0
36684	9	37125	1
5520	5	10920	0
37418	5	14347	1
22047	0	36454	0
36474	3	5808	1
25596	4	32905	0
37385	5	31953	1
18804	10	13675	0
37385	5	10127	1
38128	10	25360	0
36699	6	21744	1
25572	1	15980	0
37544	5	7397	1
2947	8	1094	0
36424	2	31979	1
15689	10	22370	0
36575	9	3604	1
422	8	36831	0
36575	9	22163	1
21738	4	9840	0
37888	3	37564	1
37555	9	10933	0
37265	0	24740	1
7576	4	31910	0
38119	0	28996	1
16728	6	9313	0
36840	5	23132	1
31910	9	13948	0
38031	4	36669	1
30197	3	14747	0
38031	5	20495	1
10773	1	13779	0
37535	8	21769	1
23693	5	10887	0
37315	5	12259	1
18567	9	15689	0
36590	0	12847	1
26534	6	32876	0
37579	0	12847	1
8966	4	8966	0
37567	0	23375	1
4025	7	16196	0
36530	2	22057	1
34730	10	19081	0
37669	3	38025	1
31239	0	21662	0
37115	4	33818	1
15438	1	14609	0
37115	3	30954	1
37797	7	19161	0
37115	5	30981	1
21824	4	17690	0
37115	5	7828	1
4372	10	10516	0
37301	0	6454	1
6122	5	11824	0
38128	0	9557	1
19407	6	25436	0
36616	6	29740	1
18195	9	13676	0
36442	4	25951	1
5404	5	37365	0
37387	0	32217	1
8041	0	18195	0
36953	0	2809	1
31239	7	27802	0
38067	0	13873	1
19722	7	34897	0
36997	2	7519	1
517	7	22914	0
37958	2	37192	1
14647	3	28525	0
37958	2	13549	1
19081	0	4973	0
37974	0	21858	1
25921	1	36516	0
36991	6	37836	1
4300	6	12439	0
36912	4	27211	1
3820	8	4966	0
36912	6	17868	1
26764	10	14342	0
36450	3	37436	1
18009	7	37406	0
36450	2	18945	1
10887	3	6122	0
36450	9	3352	1
7438	1	30294	0
36777	2	31569	1
5404	3	37528	0
37089	3	10978	1
10773	1	4746	0
37695	2	21408	1
26844	7	6101	0
37695	2	11401	1
12986	2	37299	0
38135	2	16236	1
16373	1	21789	0
37167	9	3742	1
27912	6	5324	0
36475	0	5117	1
31560	1	37528	0
37871	6	7605	1
8768	3	16450	0
36872	0	3303	1
9107	1	3987	0
36872	2	25476	1
23566	3	29226	0
36872	2	16656	1
8119	7	19052	0
36872	2	32635	1
18680	1	23035	0
37756	0	21858	1
38128	4	4123	0
37334	0	27546	1
37911	6	13676	0
37334	2	13584	1
31989	6	25596	0
37168	2	30788	1
18009	4	31606	0
38037	0	35856	1
27032	2	105	0
37293	0	21858	1
31776	8	31606	0
36569	0	18455	1
17082	7	10578	0
37049	8	36531	1
18306	5	24398	0
37832	0	38036	1
37875	5	32876	0
37832	3	7911	1
19676	0	11925	0
37815	1	14804	1
8296	3	13591	0
37937	2	4213	1
38118	7	5324	0
37937	2	21081	1
8281	8	15438	0
37383	2	38053	1
5191	8	36516	0
37383	2	25052	1
30552	1	23881	0
37383	2	18446	1
8281	4	35951	0
37383	2	2374	1
37379	5	15802	0
37383	2	37145	1
6992	6	30197	0
37383	2	22065	1
37382	4	34730	0
37383	2	29784	1
28956	9	37742	0
37383	2	6599	1
27912	5	15980	0
37383	2	24671	1
29588	1	37528	0
37383	2	19598	1
4319	6	6509	0
37383	2	32975	1
31798	7	346	0
37383	2	25449	1
21681	0	36861	0
37383	2	6489	1
27912	2	31582	0
37383	2	14752	1
2556	3	27802	0
37383	2	12417	1
4025	5	14002	0
37383	2	33492	1
14245	2	19918	0
37383	2	6496	1
31560	0	2472	0
36789	0	21858	1
33317	7	14499	0
36672	0	36497	1
24087	1	14245	0
37199	4	33177	1
36632	6	3306	0
37284	0	21858	1
17625	4	36552	0
37284	6	2338	1
37379	1	10773	0
37284	6	1572	1
31910	2	2524	0
36487	6	4134	1
31800	7	22370	0
36487	6	23862	1
30197	0	31381	0
36487	6	12437	1
28568	4	37911	0
36490	0	2293	1
8768	0	21544	0
36642	2	31835	1
4382	9	34897	0
36642	2	12698	1
26764	1	34117	0
36642	2	7713	1
1549	6	32876	0
37710	2	23707	1
31692	2	28568	0
37649	2	1408	1
19161	1	26764	0
37716	2	32210	1
21613	4	38049	0
37028	6	36862	1
23436	1	2472	0
37267	3	20389	1
23693	1	35640	0
36824	0	26857	1
18306	9	15650	0
37473	5	20325	1
3987	5	36218	0
36589	8	16346	1
29122	2	3349	0
37291	3	25051	1
30294	9	2964	0
38104	2	33517	1
32058	4	38040	0
37356	1	34276	1
37797	7	30552	0
37831	4	29789	1
6920	9	6716	0
37831	2	17546	1
2725	7	31800	0
37831	2	17077	1
1094	8	21824	0
37831	5	8492	1
30648	2	37781	0
37831	5	23346	1
36620	0	3339	0
36841	3	6986	1
7438	1	12564	0
36454	6	26412	1
37482	0	27912	0
37248	6	14442	1
3385	8	9037	0
37608	0	31363	1
16856	8	36118	0
37608	2	24337	1
5520	3	2725	0
36512	3	38011	1
25742	5	6122	0
36718	0	8666	1
5576	3	38145	0
37854	4	14826	1
14298	7	4609	0
37407	0	31462	1
13779	7	9252	0
37454	0	9258	1
37601	10	36869	0
36725	0	30255	1
36477	3	37866	0
36480	1	28032	1
38137	0	34035	0
37464	0	13800	1
19081	9	6101	0
37874	8	37467	1
11648	9	32905	0
38040	2	16310	1
10887	4	36632	0
37855	0	19436	1
35951	4	21083	0
36927	0	19527	1
2323	10	15980	0
36927	6	33317	1
3820	6	19676	0
36927	6	9914	1
25484	10	14647	0
37261	6	36512	1
13485	6	31800	0
37296	0	26005	1
28370	1	288	0
37942	2	21013	1
6007	1	2725	0
37826	2	37826	1
161	8	34974	0
36488	0	38153	1
27840	7	4966	0
37476	0	15004	1
37742	7	5495	0
37586	4	6983	1
37555	9	26764	0
36958	6	7661	1
19407	1	6007	0
36958	6	31351	1
36608	0	21789	0
36640	0	9603	1
10773	7	12999	0
38114	2	27613	1
38137	10	30197	0
37014	2	16709	1
26534	4	9252	0
37448	0	24660	1
25436	3	1344	0
37448	2	11605	1
16794	8	37781	0
37286	6	20731	1
501	6	28370	0
36533	2	12549	1
4609	3	26281	0
36533	2	36780	1
9037	5	5520	0
36533	2	35853	1
5324	9	7211	0
36533	2	29649	1
31692	8	29760	0
36533	5	18564	1
21824	8	26281	0
36533	2	16852	1
15022	10	12564	0
36775	0	19759	1
3877	6	4025	0
37761	2	10467	1
9313	9	25484	0
37761	2	1942	1
36972	8	10773	0
37069	0	14810	1
13215	8	1549	0
37680	6	28437	1
24438	7	26486	0
37680	6	26317	1
19052	3	9313	0
37680	6	21817	1
3987	7	25572	0
37680	6	34667	1
4966	0	4372	0
37282	5	12083	1
17844	7	8119	0
36483	6	12661	1
19918	4	28956	0
37546	4	7918	1
14554	2	37797	0
36853	0	19720	1
25185	8	17844	0
36785	3	31130	1
2947	8	18311	0
36637	4	1404	1
8768	1	12775	0
37353	0	9612	1
31283	1	37742	0
37497	0	19088	1
31776	0	3877	0
37083	2	19321	1
31760	5	4095	0
37083	2	29085	1
4746	5	13190	0
37083	2	7377	1
36972	9	13874	0
37083	2	36828	1
1897	10	5324	0
37083	2	33120	1
4891	9	27897	0
37083	2	37711	1
4095	5	4025	0
37083	2	36604	1
3306	4	31582	0
37083	2	3590	1
5314	7	37365	0
37083	2	35764	1
27255	9	14604	0
37083	2	10551	1
30648	7	4447	0
37952	0	15223	1
36864	4	21544	0
36729	2	1487	1
12986	2	25921	0
37768	3	16206	1
36940	9	4746	0
36835	9	3283	1
6545	1	35921	0
36835	9	16521	1
24829	3	1897	0
37797	5	2682	1
21195	7	13675	0
36778	2	24444	1
21681	5	21544	0
36781	2	1748	1
35514	2	16793	0
36781	2	19085	1
13591	7	31283	0
36781	2	38006	1
27610	1	33334	0
37023	0	24574	1
8119	4	14437	0
37453	8	36636	1
3197	3	10463	0
36992	3	1501	1
15980	10	3349	0
37593	0	19527	1
35951	5	11863	0
36446	2	15149	1
21613	7	10773	0
36611	2	14715	1
14499	5	12858	0
37260	2	10361	1
26486	4	13215	0
36700	3	23728	1
13153	5	14780	0
36686	6	19073	1
13802	8	13190	0
37434	2	31751	1
30294	7	7999	0
37434	2	2411	1
27255	0	13802	0
38085	0	32555	1
31560	9	22914	0
36825	2	5616	1
27912	9	30833	0
36825	2	28871	1
21789	6	20135	0
37019	8	32652	1
15980	1	4973	0
37019	5	4979	1
25360	10	31856	0
38072	0	23807	1
37382	7	19722	0
36574	0	10011	1
4000	8	36454	0
36574	3	37935	1
36552	3	31800	0
36597	6	12370	1
1549	7	14685	0
36597	6	26336	1
2472	3	14298	0
37576	0	2060	1
18680	1	11824	0
37576	3	30610	1
34543	10	34543	0
37004	2	10041	1
14780	8	1297	0
36989	4	36617	1
25257	2	31144	0
36989	5	36982	1
31776	3	23035	0
36989	5	36938	1
12986	7	23566	0
38015	4	16534	1
4746	1	21376	0
36791	5	574	1
4382	1	14747	0
37549	4	32349	1
4973	6	31606	0
37549	5	14330	1
28568	1	37601	0
36546	5	37199	1
25596	8	4300	0
37122	2	28506	1
14342	3	15832	0
36852	2	33650	1
19161	2	27497	0
37438	2	28903	1
36861	7	33719	0
37587	0	36660	1
31798	6	1094	0
36671	0	37216	1
44	1	16022	0
36977	3	37261	1
4447	3	10463	0
36977	10	27084	1
37379	5	36454	0
36977	5	26202	1
36988	7	36864	0
37057	0	36577	1
26864	2	13779	0
38137	0	14810	1
37916	9	37742	0
36737	4	16515	1
9604	3	517	0
38039	4	5702	1
36988	9	161	0
37397	0	22429	1
1861	7	29152	0
37312	5	15207	1
3987	10	1897	0
37835	3	3641	1
17082	1	29044	0
37040	5	1716	1
7299	5	38040	0
36899	3	37706	1
21613	9	18195	0
37840	2	5601	1
3987	4	6122	0
37229	8	13853	1
24578	9	26864	0
37515	2	25199	1
14002	7	23881	0
37052	0	14639	1
37866	4	6007	0
37357	0	23693	1
27840	9	18776	0
37394	3	6493	1
2725	0	9037	0
37285	0	23621	1
37382	0	36632	0
38056	3	37817	1
5124	9	31692	0
37077	0	24684	1
26486	5	31989	0
37725	0	24045	1
33334	5	16728	0
37779	4	21016	1
27032	6	17690	0
37779	5	6870	1
7275	8	3820	0
36828	6	20076	1
10773	6	37601	0
37731	1	16794	1
27817	8	27497	0
37399	0	22010	1
19918	0	22370	0
37399	5	19861	1
21376	6	24556	0
36520	0	16379	1
25436	3	22370	0
37770	0	24877	1
29595	6	6007	0
36712	0	37992	1
22047	2	12725	0
37465	0	37433	1
1897	7	13675	0
36942	3	37489	1
6992	1	25578	0
37955	2	17774	1
10578	4	21083	0
36524	8	38043	1
25578	5	31760	0
36524	5	37349	1
14437	5	2556	0
38091	2	17742	1
13874	8	13676	0
38091	2	10734	1
17844	3	13190	0
36485	2	19270	1
33027	5	12564	0
36485	2	12548	1
9107	8	10134	0
37737	0	33950	1
6141	0	27802	0
36705	3	2278	1
6141	7	13190	0
37842	2	17584	1
16563	1	22047	0
36604	3	7847	1
4973	5	37797	0
38016	1	20653	1
6920	10	15075	0
37446	2	9781	1
22050	3	20135	0
37446	2	7928	1
37916	3	15870	0
37852	0	10011	1
9129	8	14245	0
37331	3	37775	1
37299	5	4000	0
37331	6	36452	1
32058	5	8041	0
37331	6	31005	1
4000	5	7299	0
37331	6	16838	1
2524	8	33334	0
37457	0	4595	1
15438	8	36516	0
37653	0	8832	1
29595	10	1344	0
37339	0	9798	1
22370	8	8296	0
38096	2	15132	1
4447	3	15689	0
37123	0	19527	1
5404	6	29226	0
37821	3	37197	1
34974	4	19347	0
36738	3	24708	1
37555	9	6101	0
36436	5	822	1
34897	0	18804	0
36436	5	9243	1
16902	9	10887	0
36910	0	2060	1
10933	5	4382	0
36507	2	33677	1
12439	1	13591	0
37299	2	22064	1
21824	0	21613	0
37506	8	20695	1
14342	8	15650	0
37506	5	35081	1
8041	5	27640	0
37506	5	30481	1
28370	3	37916	0
37850	2	34198	1
19407	7	6169	0
37439	5	22268	1
30833	5	35640	0
37439	5	35784	1
8296	6	31989	0
37697	0	28440	1
31800	5	37896	0
36567	2	15695	1
18804	0	34035	0
37810	3	2928	1
8900	8	14342	0
37886	5	4977	1
19117	10	35951	0
38147	3	23547	1
21083	5	5244	0
37523	6	22072	1
15689	2	13215	0
36566	0	27507	1
35514	1	31800	0
36439	3	22422	1
8041	6	9604	0
36439	6	19880	1
1149	1	29588	0
37358	0	13401	1
16856	6	27912	0
36522	3	24596	1
2472	4	27897	0
36522	6	27945	1
3349	10	31776	0
36522	6	2152	1
10773	9	37299	0
37509	6	37351	1
6141	2	23339	0
37509	6	34995	1
13215	10	10773	0
37423	0	36507	1
37601	10	5404	0
37631	3	2332	1
11648	8	17844	0
36677	2	37850	1
24578	5	9129	0
38071	2	24748	1
29044	1	23436	0
38071	2	36274	1
3877	5	19722	0
36693	6	19584	1
38137	9	3347	0
36693	6	15210	1
9037	5	25257	0
37367	0	21733	1
3877	5	3877	0
37367	2	18044	1
26486	6	37589	0
37367	2	13064	1
3197	7	31283	0
36459	3	36493	1
34974	9	11925	0
37753	2	12354	1
9129	8	6716	0
37460	2	36632	1
8314	1	14342	0
36497	2	37763	1
15870	6	6920	0
38118	2	6846	1
9037	0	1861	0
36664	2	32703	1
11824	5	23881	0
37908	0	5664	1
8545	0	26534	0
37402	6	36056	1
14609	4	14298	0
37223	3	4313	1
37692	1	21083	0
37195	0	37083	1
18053	2	2947	0
37382	3	605	1
6509	4	37911	0
37665	6	28346	1
37797	4	6992	0
36476	4	36826	1
37692	8	15689	0
36889	4	22206	1
30197	0	36852	0
36809	2	15412	1
19918	1	4300	0
36809	2	13115	1
33334	7	12439	0
36743	5	32485	1
30552	6	34035	0
36444	2	11719	1
21083	6	18567	0
37410	0	26488	1
2725	0	1344	0
37548	3	37563	1
10773	10	5124	0
36644	2	16221	1
35951	4	346	0
36644	2	37444	1
9129	9	14685	0
36644	2	13750	1
37896	7	15022	0
37058	0	896	1
19232	1	6920	0
36707	0	732	1
32058	6	346	0
36900	2	3852	1
25921	3	22047	0
37421	3	37388	1
24556	1	8545	0
37788	0	1474	1
31989	6	25596	0
37466	5	35237	1
19407	6	12564	0
37466	5	14136	1
7999	2	8193	0
37466	10	4360	1
13215	4	4300	0
38007	3	26596	1
21599	8	6007	0
37055	0	24789	1
13215	2	24087	0
37305	0	14639	1
30294	0	21681	0
36532	0	8462	1
16563	2	38145	0
37664	0	19754	1
19918	4	9313	0
37913	4	22131	1
5495	10	37875	0
36864	0	37407	1
14002	3	3349	0
37440	0	24854	1
3450	7	20235	0
37440	5	20648	1
24796	9	2556	0
37498	0	13647	1
24747	10	10920	0
37498	0	36254	1
28525	5	28956	0
38019	6	26709	1
27802	8	17017	0
37750	6	35059	1
19918	4	26486	0
38048	2	10773	1
7693	0	30552	0
37999	2	36497	1
22370	8	24747	0
37999	2	23508	1
27855	6	15075	0
37999	2	19004	1
38118	9	18306	0
37705	2	23076	1
24556	2	33334	0
37688	0	5293	1
14499	4	10887	0
37688	2	33765	1
17690	1	37365	0
37688	2	32159	1
37692	2	9840	0
37688	2	26545	1
971	9	28045	0
37688	2	25965	1
14499	7	12858	0
37688	2	35977	1
37365	9	6509	0
37349	5	18363	1
105	9	26281	0
37349	5	19446	1
3897	4	19918	0
37349	5	32192	1
15689	0	38145	0
37349	5	26238	1
4609	0	14609	0
37268	0	10574	1
346	5	5314	0
37222	2	17016	1
37601	6	15438	0
37222	2	36420	1
16747	10	3347	0
37411	6	5690	1
3987	3	31760	0
36646	3	23728	1
37742	5	19545	0
36435	5	20508	1
12439	9	14647	0
37414	1	15712	1
35951	3	14609	0
37573	3	7730	1
28568	1	36471	0
36618	0	15335	1
37814	4	35951	0
37202	0	38036	1
4966	4	21681	0
36433	0	23113	1
31989	4	31989	0
36433	9	15707	1
37379	2	10773	0
36433	9	14965	1
36940	9	11648	0
37275	0	24897	1
38137	9	2019	0
38045	5	18544	1
8768	4	16373	0
38045	5	37021	1
18195	9	36471	0
38045	5	8705	1
23693	0	23693	0
36861	2	10782	1
36516	9	32058	0
36861	2	16287	1
11782	7	10887	0
37916	0	17220	1
12725	3	37365	0
37712	6	17869	1
18311	1	22914	0
36649	2	17915	1
11065	2	31582	0
36716	5	22200	1
36972	7	32058	0
37773	2	15032	1
15650	6	37797	0
37210	4	18196	1
36552	3	31144	0
36826	5	2883	1
501	0	32876	0
36826	5	34705	1
27802	6	36584	0
36826	10	19007	1
10933	9	23881	0
36928	0	36903	1
11648	0	19232	0
37494	0	10626	1
11782	1	19161	0
36917	0	21376	1
14747	3	22799	0
36917	2	21988	1
36620	3	15438	0
36995	0	26132	1
161	2	18270	0
36950	0	7858	1
28568	7	10532	0
37297	0	27656	1
37482	6	31760	0
37707	3	23728	1
14973	2	34974	0
36587	5	27014	1
27640	4	4319	0
37504	6	10555	1
10887	6	19722	0
38051	0	38017	1
31239	5	37786	0
38051	2	2983	1
1711	6	5314	0
37658	3	754	1
1897	1	34897	0
38103	0	28418	1
30387	6	33334	0
38103	2	2072	1
2472	7	10532	0
37352	0	27546	1
8281	8	105	0
37510	3	36506	1
36972	8	22914	0
36726	1	36648	1
37786	2	8545	0
38105	0	35344	1
38137	3	10933	0
38105	2	32356	1
31856	4	15022	0
37193	3	38149	1
3820	4	33027	0
37677	3	34466	1
31800	8	27470	0
36537	0	2371	1
4123	4	13485	0
37012	8	38135	1
17320	6	15438	0
36489	0	36024	1
14685	5	13779	0
36832	0	13830	1
10773	8	1711	0
36832	3	7730	1
6122	5	29122	0
37723	0	23731	1
31800	3	21599	0
37723	4	22777	1
2472	3	13874	0
36550	0	36531	1
19052	1	24087	0
36761	2	15969	1
35640	5	10887	0
37239	2	24197	1
422	8	11742	0
37239	5	30000	1
16022	7	3385	0
37636	0	14228	1
14780	10	33027	0
37279	1	23431	1
3987	9	25742	0
37800	4	9976	1
37589	8	22196	0
37847	0	22328	1
17625	9	12775	0
38107	0	37417	1
26864	10	24087	0
37217	2	4182	1
37528	9	4000	0
37976	0	8808	1
5124	4	346	0
36923	4	25820	1
23436	4	27897	0
37959	0	791	1
17082	7	13874	0
36561	0	12847	1
27032	5	37601	0
37553	2	30011	1
15870	8	17844	0
36833	0	35231	1
25360	2	6169	0
37857	0	6454	1
10773	3	501	0
37078	0	5329	1
28956	10	501	0
37078	3	11893	1
31130	9	16728	0
37143	0	3636	1
8314	7	19081	0
37595	1	13127	1
4095	5	28045	0
37080	0	36497	1
22066	10	15689	0
36876	0	18521	1
15870	7	17017	0
37302	5	16105	1
15870	4	20235	0
37157	1	7205	1
16747	6	20800	0
37108	0	7214	1
8966	7	11742	0
37396	6	21392	1
13591	7	16728	0
36526	2	8265	1
36972	2	37379	0
36526	2	1087	1
6545	4	16793	0
37362	0	10484	1
38040	3	22914	0
38022	0	24834	1
31910	1	10813	0
36549	6	15215	1
22196	9	27802	0
38029	2	35252	1
3820	10	35921	0
37132	0	37347	1
9313	3	23339	0
37132	1	16794	1
29198	3	2725	0
36568	0	12760	1
24829	8	18306	0
37224	4	36552	1
37916	5	3450	0
37948	0	4251	1
27470	6	21544	0
37948	6	32706	1
9604	10	5404	0
36871	0	15826	1
35640	10	27497	0
36479	3	34007	1
12775	0	29152	0
38077	3	36929	1
15689	8	17844	0
38077	6	36493	1
20800	1	19161	0
38144	2	18398	1
37781	10	37916	0
38144	9	7584	1
29122	7	19161	0
38144	9	8265	1
7275	1	22050	0
38144	9	8635	1
23693	2	11824	0
36667	2	14986	1
2947	7	17082	0
36667	2	26724	1
11065	9	33248	0
38011	6	37428	1
25247	3	34846	0
38011	6	25693	1
6920	5	31283	0
36808	0	30635	1
37365	1	29760	0
37846	2	8320	1
32331	0	25360	0
37034	2	5749	1
19052	2	31989	0
36838	0	21578	1
12999	6	36972	0
36838	2	27803	1
971	4	37050	0
36810	0	12847	1
29044	5	1711	0
37967	4	36780	1
343	10	5314	0
37536	0	37168	1
37299	5	36702	0
36652	2	28443	1
4609	0	21083	0
37088	1	23431	1
37601	8	17082	0
37220	8	25879	1
37589	4	26534	0
37360	0	36749	1
37299	6	7299	0
36603	0	16897	1
28943	10	4123	0
37134	5	32870	1
9037	5	29198	0
37134	5	13926	1
8966	3	19676	0
37134	5	10858	1
22799	1	15832	0
36692	0	27726	1
22050	1	12564	0
36692	3	27880	1
19722	1	2323	0
37093	2	36305	1
21083	3	37912	0
37769	8	32652	1
36988	7	10516	0
37769	4	36826	1
14154	0	9794	0
37447	0	19720	1
13434	9	16450	0
37447	2	28216	1
5191	0	5576	0
37447	2	34865	1
31560	5	21083	0
36591	4	33064	1
5093	3	21376	0
36998	4	16267	1
11141	5	29152	0
36998	9	36074	1
37299	8	36516	0
38109	2	28566	1
27255	2	2556	0
38116	5	3190	1
25257	6	8768	0
38116	5	9057	1
37382	5	31381	0
36768	0	14611	1
19161	6	25742	0
37000	1	16794	1
36218	8	37677	0
37765	2	32448	1
422	6	30825	0
37734	2	5800	1
37382	7	31381	0
37526	3	37706	1
8314	6	11065	0
37485	0	37035	1
4025	6	12858	0
38017	2	38051	1
37365	10	22914	0
38006	2	19550	1
14245	0	37742	0
38006	2	32820	1
21824	3	22047	0
36624	6	32674	1
18804	2	37677	0
37589	0	18922	1
5124	6	5576	0
37377	3	37848	1
36218	3	6992	0
37844	8	25354	1
31760	1	34035	0
37659	4	7083	1
16563	10	27897	0
37905	0	15443	1
7987	2	36471	0
37158	8	21977	1
19918	7	24438	0
38132	2	13926	1
2019	3	6101	0
38133	9	18121	1
1897	7	14342	0
36585	6	8127	1
9037	7	1297	0
36658	3	11609	1
34897	0	26844	0
37792	0	3554	1
36118	4	2323	0
36758	6	29963	1
12858	2	37797	0
36770	2	33044	1
34974	0	1861	0
36786	3	36869	1
21613	5	29760	0
36534	0	32555	1
2472	9	17320	0
36990	3	26928	1
24087	8	14437	0
36975	0	37936	1
2947	2	17320	0
36498	2	25230	1
37786	10	5093	0
38098	0	17292	1
31760	4	37873	0
36441	0	35770	1
9794	9	4000	0
37068	4	33818	1
28956	9	25596	0
37068	5	36994	1
37896	4	36477	0
37068	5	5670	1
32905	5	18266	0
37068	5	36523	1
29152	1	3385	0
37066	1	10068	1
24556	3	26486	0
38153	0	20685	1
37050	2	2323	0
36698	0	19527	1
4095	10	37797	0
37115	3	10863	1
2465	10	501	0
37620	1	1590	1
17017	8	27855	0
37729	2	36518	1
10920	10	5520	0
36494	0	10309	1
10923	1	10923	0
37163	0	13830	1
4811	6	8034	0
36812	0	37083	1
37004	1	7438	0
37442	9	11718	1
14245	2	36940	0
37442	9	615	1
22914	4	31560	0
37698	3	6021	1
5324	8	27817	0
36819	5	7708	1
21544	7	26750	0
37467	0	14874	1
27855	8	15075	0
37914	0	36024	1
8193	6	36477	0
36491	0	8588	1
12986	3	346	0
37639	0	9557	1
36422	4	36632	0
37639	6	30608	1
29595	5	17625	0
37639	6	16023	1
16196	5	4973	0
36581	3	31537	1
12858	4	30552	0
36606	3	23214	1
161	0	4123	0
37657	6	27726	1
20978	4	15075	0
37657	6	37848	1
36988	10	8768	0
36932	0	18455	1
27497	7	23881	0
36805	0	37802	1
19326	0	7275	0
36727	4	30693	1
36552	8	33027	0
37633	5	32915	1
33334	7	10813	0
36499	5	4748	1
32876	0	27802	0
38123	0	11068	1
28045	5	37886	0
37221	2	29605	1
37382	4	19161	0
36601	6	26924	1
23339	0	2465	0
37841	6	35326	1
16373	8	30070	0
37979	6	37543	1
32905	0	11648	0
37794	5	36717	1
5324	8	34117	0
37391	0	23149	1
30387	6	14437	0
37036	0	30150	1
25578	10	34117	0
37818	0	9615	1
3877	1	37677	0
36831	0	1484	1
19093	1	4891	0
37298	4	14467	1
32331	1	29152	0
37298	4	31988	1
15986	9	2556	0
37610	0	14810	1
6007	9	7999	0
37610	3	29805	1
30070	8	33637	0
36668	6	26852	1
15689	3	2524	0
37044	6	37036	1
6141	1	37875	0
37375	0	36763	1
16022	3	29198	0
37225	0	21774	1
10923	5	8281	0
37225	2	23154	1
13215	7	2465	0
36622	0	37994	1
13215	5	25596	0
36622	2	17612	1
12775	2	36842	0
37623	2	12004	1
31800	9	27840	0
36784	2	27190	1
44	10	161	0
37514	0	21858	1
19232	7	14604	0
37209	0	16611	1
16563	5	10923	0
37807	0	19041	1
10532	7	28568	0
37441	3	29805	1
6122	2	26844	0
37320	3	21949	1
37406	7	6122	0
37320	2	27714	1
12858	4	18306	0
37320	2	19776	1
11782	10	37478	0
37320	2	32933	1
24796	10	13948	0
37320	2	3790	1
6716	1	17844	0
37320	2	33906	1
16196	6	19722	0
37373	0	19527	1
4966	7	35514	0
37373	6	25892	1
30833	1	1897	0
37580	2	35180	1
2472	2	26281	0
37484	3	30512	1
1297	7	36842	0
37484	6	721	1
28273	4	4000	0
37484	6	19156	1
23035	2	31776	0
37484	6	14138	1
29226	6	27640	0
37484	6	20474	1
29198	3	10516	0
37829	0	19542	1
17320	3	37365	0
37016	0	21235	1
14437	6	17844	0
38033	2	8872	1
31130	1	13948	0
37262	5	23911	1
33637	6	11141	0
36983	8	19794	1
19676	1	9037	0
37572	4	37572	1
27840	4	2725	0
36750	0	37704	1
13779	3	25484	0
36750	4	1202	1
15986	0	2556	0
36493	3	38077	1
27255	6	14604	0
36501	2	37773	1
11782	8	31776	0
38156	3	3787	1
21376	8	13190	0
37660	3	28746	1
12439	10	34035	0
38002	2	36275	1
16022	5	36988	0
37726	3	13142	1
36454	8	13676	0
38080	3	28421	1
9313	6	32876	0
38080	5	38080	1
1297	10	4372	0
36971	1	16794	1
24438	9	8119	0
37086	0	13282	1
24438	9	32876	0
38120	3	18100	1
24556	4	37916	0
38120	2	26669	1
1711	5	12999	0
38113	2	15795	1
27032	4	105	0
37795	6	8230	1
37050	6	3347	0
37772	3	14179	1
31776	0	12858	0
36925	3	20791	1
1344	6	21544	0
36925	6	32953	1
14780	7	16793	0
37893	2	5107	1
30294	3	34974	0
37893	2	2655	1
37050	2	37873	0
36615	2	10856	1
1297	0	8034	0
36615	2	15099	1
25596	7	15986	0
38148	2	19518	1
1861	10	34846	0
38148	2	33803	1
31381	2	2019	0
36513	0	36774	1
9840	7	17690	0
37926	2	16639	1
25360	1	12775	0
37926	2	5492	1
23339	8	25596	0
37038	4	30581	1
16747	2	971	0
37341	4	37132	1
37677	5	37050	0
37067	3	29884	1
37528	5	18567	0
36607	2	30911	1
21789	5	11141	0
36746	3	1909	1
6007	6	37866	0
37428	5	21487	1
36842	4	20135	0
37798	6	35388	1
27897	10	11863	0
37849	8	2647	1
38137	4	37406	0
37849	5	10566	1
13153	0	23843	0
37749	0	17140	1
37677	5	18680	0
37749	1	15712	1
37886	3	37382	0
37920	3	10677	1
6101	9	13675	0
36842	2	28253	1
4382	5	4095	0
37583	2	30383	1
15832	1	13675	0
37547	0	2509	1
26844	8	34035	0
36470	0	21245	1
8545	7	14647	0
36634	0	11068	1
19093	9	37365	0
38046	0	31462	1
25578	10	31760	0
38046	2	18409	1
29595	4	25247	0
37906	0	32677	1
36861	1	14780	0
37507	3	37706	1
36118	2	19722	0
38111	0	30693	1
36869	0	29044	0
36793	0	36498	1
24747	9	25436	0
37550	0	29491	1
1149	5	17320	0
37395	2	29233	1
18195	10	8623	0
37403	2	37627	1
30070	4	14780	0
38154	3	14149	1
18266	4	19918	0
37640	3	20397	1
22050	1	29198	0
36579	2	35580	1
37365	2	16563	0
36636	2	1979	1
31582	1	37886	0
36636	2	247	1
36842	10	34543	0
36636	2	33778	1
4811	7	30294	0
36636	2	37701	1
29198	5	24747	0
36636	2	21500	1
25360	3	13153	0
36636	2	8482	1
35640	5	35640	0
36636	2	2998	1
30552	7	4382	0
36636	2	34523	1
31776	6	36118	0
36636	2	5415	1
31606	10	29122	0
37405	1	37621	1
32876	0	23339	0
38062	0	30698	1
21613	1	36471	0
37184	5	8935	1
37050	2	23693	0
37525	0	36024	1
11065	1	11782	0
37897	0	2392	1
31606	7	4025	0
36655	5	25470	1
31760	2	27912	0
38092	0	32555	1
346	6	27897	0
38092	3	23728	1
13434	2	26526	0
37333	3	37372	1
9840	3	18053	0
37333	2	20171	1
36218	3	23693	0
36799	3	4248	1
6007	7	17625	0
38000	2	1057	1
30833	6	10887	0
37931	4	31359	1
33719	1	12564	0
36879	0	28844	1
5520	2	33027	0
36715	2	37774	1
32331	8	37896	0
36697	0	37734	1
37875	6	25185	0
37882	4	2852	1
34035	4	36632	0
37882	2	35695	1
2472	10	14154	0
37501	8	37383	1
36842	10	8193	0
37274	5	1467	1
31856	6	10516	0
37274	5	14628	1
9037	4	422	0
37554	4	5419	1
21681	10	36861	0
37324	0	37335	1
4025	0	14554	0
38030	3	11609	1
44	5	36552	0
38030	6	7121	1
37781	9	6920	0
36471	0	27242	1
28045	7	34035	0
36471	2	17980	1
16728	1	13802	0
36471	2	37236	1
22050	10	11925	0
37746	6	27984	1
3877	3	36118	0
37746	6	28250	1
13779	4	25185	0
37746	6	11720	1
22799	0	16856	0
37925	0	36325	1
10463	7	2524	0
37470	3	5074	1
4973	8	15980	0
37470	2	9324	1
21738	4	38040	0
36663	4	263	1
37379	10	5576	0
36753	6	31296	1
18567	4	4609	0
37727	2	20940	1
24747	5	10920	0
37727	2	16166	1
4300	3	33334	0
37752	2	3746	1
19117	1	29044	0
37273	3	37435	1
4000	1	9840	0
37273	6	17110	1
3349	4	34035	0
36862	0	24877	1
37379	8	38049	0
36862	3	37028	1
16793	10	31856	0
37561	0	35756	1
16856	10	38118	0
37056	8	36131	1
34730	10	33248	0
37056	8	9093	1
19161	8	37050	0
36806	0	27068	1
36584	6	36940	0
36806	2	20338	1
37873	2	14554	0
37126	3	31912	1
32905	6	19545	0
36648	9	5106	1
25300	9	32876	0
36648	9	5337	1
4447	0	13802	0
36648	9	4998	1
27817	3	36218	0
36648	9	9710	1
37382	7	36118	0
36648	9	7589	1
4746	3	17017	0
36648	9	18576	1
10578	3	38145	0
36648	9	29747	1
32058	10	31904	0
36648	9	7804	1
10134	0	20800	0
36648	9	7316	1
16022	6	35514	0
36648	9	14445	1
343	0	18053	0
36648	9	21511	1
343	7	5576	0
36648	9	29711	1
30552	10	24398	0
36648	9	503	1
14647	9	27255	0
36648	9	23812	1
16747	2	7693	0
36648	9	29237	1
35514	1	25360	0
36648	9	38027	1
37866	0	30294	0
36648	9	36472	1
15802	9	4319	0
36648	9	4558	1
34897	1	23693	0
36648	9	8233	1
1149	10	6509	0
36648	9	22755	1
10923	2	10923	0
36648	9	36726	1
4319	7	37912	0
36648	9	12418	1
31144	8	4966	0
36648	9	24148	1
8193	10	8966	0
36648	9	26493	1
20235	10	28525	0
36648	9	811	1
37896	5	20135	0
36648	9	17232	1
26534	3	7576	0
36648	9	4239	1
8119	6	37875	0
36648	9	10008	1
8966	2	34543	0
37317	0	3113	1
19117	6	21738	0
37251	5	21966	1
38118	6	30552	0
37251	5	3395	1
21376	1	22066	0
37752	2	32698	1
29595	3	8966	0
38082	0	10734	1
37896	6	36477	0
36874	0	22118	1
8314	1	37724	0
36874	4	35725	1
5093	3	24796	0
37834	0	25507	1
29588	1	19117	0
36756	0	31241	1
36940	8	19232	0
36660	2	37587	1
17844	1	27610	0
37592	0	12901	1
18195	0	29588	0
38004	3	6705	1
14298	2	36471	0
36800	6	11398	1
13802	2	25185	0
36432	0	36205	1
28273	2	31560	0
36744	0	38107	1
422	6	1297	0
37070	4	24009	1
6545	8	4123	0
37070	2	36940	1
25257	7	36842	0
37596	8	38048	1
21789	2	19347	0
37596	4	15236	1
5520	5	37866	0
37885	0	9603	1
33317	1	27912	0
37885	6	36597	1
19052	10	31283	0
36926	0	17722	1
8034	9	13485	0
38122	0	24740	1
31776	2	31381	0
36736	2	30920	1
30825	9	17625	0
36505	0	32478	1
4966	1	10516	0
36505	3	37388	1
7816	1	19676	0
37560	2	14713	1
37912	8	12725	0
37560	2	11977	1
20235	1	8545	0
37529	2	37590	1
13434	1	1861	0
37529	2	30958	1
26844	0	22799	0
37443	1	35124	1
44	6	31144	0
37045	3	36487	1
31910	2	36584	0
37045	6	1188	1
27497	6	27817	0
38068	0	11340	1
9129	7	31910	0
38068	3	29025	1
5191	9	5124	0
38081	0	13853	1
13874	7	4609	0
38081	5	37530	1
37365	9	28568	0
37029	0	31112	1
21824	6	7299	0
37029	3	37024	1
35514	3	34846	0
37743	4	3672	1
31582	7	971	0
37896	0	19527	1
20235	7	36940	0
37896	6	4354	1
4382	8	30833	0
36868	0	5614	1
18804	9	37555	0
36563	5	38009	1
6141	7	12439	0
36517	4	27950	1
2947	6	18567	0
37870	0	29157	1
22066	8	27610	0
[truncated: 2,862 more rows]
