# Supplementary material
Source: ML conference proceedings conference paper supplement (https://proceedings.neurips.cc/paper_files/paper/2021/hash/0fd600c953cde8121262e322ef09f70e-Abstract.html)
Supplement: Supplementary file 1 [file 0fd600c953cde8121262e322ef09f70e-Supplemental.zip › Supplementary_Material_Paper_8745/data/Hamaguchi-BM_head-5000/test/test-random-sample/test4.txt]

38038	0	13590	1
16471	7	13162	0
37961	2	21629	1
22066	3	4746	0
37786	2	21674	1
9313	7	11648	0
37125	0	9144	1
31381	6	33317	0
37706	6	33781	1
25921	8	35951	0
37706	6	4066	1
21824	9	13874	0
37706	2	2163	1
36942	8	19358	0
37706	6	34609	1
36516	5	7987	0
37706	6	16086	1
14604	7	19426	0
37706	6	3596	1
15980	1	7211	0
37706	6	33602	1
10134	0	19081	0
37706	6	30633	1
22370	3	12439	0
37706	6	31350	1
19081	1	36422	0
37732	8	21977	1
36620	0	23436	0
36920	0	18455	1
971	9	10887	0
36920	6	30072	1
3339	10	36972	0
37431	0	21858	1
19161	5	11824	0
37431	3	5512	1
6169	0	7438	0
36503	9	19295	1
36852	5	18804	0
36452	6	23095	1
37197	5	19640	0
37256	6	32897	1
4382	9	31760	0
37175	0	1494	1
27640	1	36702	0
37995	0	38058	1
5314	0	23436	0
37995	2	19334	1
11141	7	4372	0
36617	5	36348	1
2947	7	5191	0
36617	5	37969	1
37781	2	26486	0
36617	5	3479	1
17320	8	105	0
36617	5	37281	1
10920	7	30294	0
37683	4	8226	1
27800	2	27664	0
37740	1	27492	1
11742	0	15022	0
36559	4	3873	1
14245	8	12439	0
37452	3	37746	1
37555	7	37050	0
37490	0	38106	1
1711	2	38040	0
36883	2	5309	1
9794	7	8281	0
36760	2	28698	1
20695	8	37502	0
36760	2	15844	1
25300	5	32905	0
37527	1	38144	1
10463	10	24578	0
37408	0	22280	1
35459	1	31480	0
37408	2	19626	1
21195	5	37797	0
37408	2	23911	1
19426	3	37742	0
37718	0	11318	1
27840	0	12775	0
37487	5	10055	1
33054	3	2807	0
37412	4	34985	1
37692	8	28568	0
37820	1	2195	1
17760	8	10747	0
36614	3	13925	1
4025	9	23881	0
38095	9	20539	1
19640	1	37106	0
38095	9	20083	1
4000	7	38040	0
37676	0	12847	1
37502	3	25060	0
36552	5	7602	1
26281	1	17320	0
36552	5	6623	1
4000	9	17320	0
37351	0	23693	1
31910	4	26534	0
37351	3	37509	1
9840	4	7987	0
37351	6	20995	1
36516	7	343	0
36795	1	6886	1
4123	1	161	0
36690	0	36504	1
19358	0	31301	0
38078	6	4844	1
11824	3	23693	0
36495	2	10254	1
3197	6	26864	0
36495	2	37611	1
33637	1	27840	0
36495	2	38140	1
37379	0	21824	0
36495	2	12686	1
7576	7	26864	0
36495	2	4171	1
29226	6	1711	0
36495	2	30916	1
24398	10	10134	0
36495	2	11884	1
15252	7	23632	0
37996	0	32555	1
29226	2	37912	0
37663	1	26796	1
36988	3	2725	0
37475	2	20536	1
1549	1	15870	0
36632	2	27167	1
15476	7	7016	0
37144	3	1033	1
35972	1	15712	0
37099	6	13451	1
31716	0	2229	0
37099	6	37402	1
12437	2	11392	0
37099	6	7680	1
7016	6	18074	0
37099	6	7730	1
36218	1	37873	0
37099	6	26613	1
1009	1	31113	0
37868	0	11719	1
14609	3	5244	0
37278	0	26360	1
28370	7	36940	0
36966	2	36580	1
37596	0	37749	0
37899	3	4039	1
36702	2	9840	0
37458	0	38036	1
422	2	28943	0
36678	6	36965	1
30197	6	25572	0
38042	2	29551	1
4382	9	14342	0
36817	2	34279	1
37382	5	31606	0
36817	2	11428	1
31798	10	36516	0
36817	2	32167	1
30294	6	18270	0
36817	2	27904	1
6169	5	19407	0
36817	2	36780	1
9840	4	31798	0
37424	2	10914	1
161	6	30070	0
38142	2	16206	1
36983	3	31480	0
37962	0	1494	1
6141	2	33334	0
36898	3	7692	1
37724	7	36422	0
37469	3	37715	1
25432	8	14496	0
37340	0	37465	1
343	9	28273	0
37187	2	24954	1
1711	5	17690	0
36869	3	27796	1
19347	9	22050	0
36869	6	15409	1
19426	1	2465	0
36869	6	31981	1
37531	3	11129	0
36869	6	13404	1
36445	9	19358	0
36869	6	16754	1
23436	2	37299	0
36869	6	23520	1
31480	10	12158	0
36869	6	26232	1
11925	1	36552	0
36869	6	16304	1
7299	1	36516	0
36869	6	32400	1
9061	8	37513	0
36869	6	19036	1
27610	9	18266	0
36869	6	258	1
28273	9	12999	0
37877	0	10011	1
37555	5	25572	0
36804	2	18529	1
23566	9	36869	0
36555	0	19527	1
4000	9	36620	0
36731	0	36325	1
38049	8	2472	0
36731	3	27635	1
13190	3	9252	0
36610	0	37417	1
15870	5	4447	0
37164	0	11068	1
15075	1	32876	0
38024	6	5783	1
37589	4	26864	0
36930	4	36617	1
25257	3	19676	0
36887	5	11430	1
35921	4	12775	0
36887	9	13402	1
2229	9	36983	0
36792	2	23735	1
14154	0	9604	0
36792	2	16473	1
9794	9	12725	0
36696	3	11628	1
10532	10	19093	0
37721	0	18977	1
25432	6	12861	0
37721	1	25201	1
2556	5	23339	0
36734	2	7578	1
31239	9	30387	0
38013	5	25160	1
22047	6	12986	0
36984	4	22206	1
12439	7	16728	0
36823	2	21925	1
10910	5	15368	0
36675	6	35645	1
5244	2	27032	0
36675	6	24081	1
4609	2	27032	0
37182	4	18196	1
26750	3	19326	0
37314	0	14810	1
4123	9	16022	0
37939	1	5235	1
31692	7	9604	0
37571	3	37755	1
5324	3	34035	0
37084	0	4944	1
16424	6	12158	0
36757	0	36711	1
19232	6	13591	0
37520	0	28714	1
37873	3	23881	0
36639	4	1401	1
4186	8	37531	0
36993	6	19453	1
23843	4	19326	0
38066	3	34899	1
16424	7	23210	0
37148	0	25641	1
6992	3	27817	0
37374	0	37899	1
36861	4	37866	0
38005	8	29602	1
4025	8	4095	0
38005	1	10068	1
35951	10	31560	0
37345	0	12847	1
22066	0	14685	0
37345	3	34059	1
422	10	21681	0
37936	2	20271	1
34117	5	14554	0
37936	2	5195	1
10923	1	21083	0
36515	0	1898	1
6545	5	16022	0
38130	2	25805	1
36218	0	37050	0
37598	0	3113	1
37873	0	36852	0
37145	8	37383	1
15689	10	1711	0
37609	4	23903	1
1549	3	36940	0
37109	0	31363	1
6920	9	16728	0
37429	2	37187	1
1149	6	36471	0
36924	0	14810	1
4000	9	12986	0
37059	0	28682	1
21789	2	6007	0
38065	8	20695	1
6980	1	3254	0
38065	5	18780	1
18009	2	25578	0
38065	5	35081	1
6101	7	37050	0
37667	2	26005	1
30833	2	4382	0
37190	2	5549	1
27800	9	1009	0
37190	2	18069	1
18804	8	23035	0
37748	0	2060	1
37038	5	6787	0
37748	6	36331	1
37106	5	6787	0
37634	2	9024	1
31144	3	26526	0
37655	6	31042	1
13675	5	11824	0
37371	4	37371	1
887	1	14496	0
36635	6	29654	1
23693	2	34035	0
37241	4	28335	1
29595	10	17625	0
36904	0	37497	1
17320	1	17690	0
36794	0	26288	1
34846	5	12775	0
36711	2	31747	1
16794	9	28370	0
36711	2	27355	1
3254	4	28221	0
36502	0	31636	1
28176	0	15252	0
37530	4	38081	1
6992	3	2019	0
38055	3	10755	1
34730	9	7693	0
36963	1	37784	1
4123	5	36864	0
36612	2	1646	1
12437	10	11129	0
36612	2	37230	1
31606	8	5324	0
36612	2	13556	1
5660	7	1620	0
37155	9	37919	1
36942	7	18074	0
37537	2	6960	1
24087	2	13215	0
37591	1	29429	1
37786	0	31910	0
36752	4	19859	1
21544	10	34846	0
36684	9	8113	1
37875	6	4447	0
36684	9	13617	1
19358	0	23632	0
36684	9	37125	1
30833	2	9107	0
37418	5	14347	1
10920	6	3820	0
36474	3	5808	1
29198	0	1344	0
37385	5	31953	1
26281	2	29226	0
37385	5	10127	1
15802	1	8623	0
36699	6	21744	1
1149	6	14154	0
37544	5	7397	1
24578	9	31130	0
36424	2	31979	1
2472	7	8281	0
36575	9	3604	1
8900	6	10134	0
36575	9	22163	1
15689	9	27032	0
37888	3	37564	1
343	7	29226	0
37265	0	24740	1
32905	3	11648	0
38119	0	28996	1
1026	10	32475	0
36840	5	23132	1
36864	5	36552	0
38031	4	36669	1
25596	4	27802	0
38031	5	20495	1
5093	1	19232	0
37535	8	21769	1
16856	5	9107	0
37315	5	12259	1
27912	7	15980	0
36590	0	12847	1
19081	7	10134	0
37579	0	12847	1
37531	3	36942	0
37567	0	23375	1
14496	7	16118	0
36530	2	22057	1
36584	2	4447	0
37669	3	38025	1
35921	2	19407	0
37115	4	33818	1
29588	10	12986	0
37115	3	30954	1
30825	0	16793	0
37115	5	30981	1
2556	0	24796	0
37115	5	7828	1
2104	2	17797	0
37301	0	6454	1
21083	9	2807	0
38128	0	9557	1
27255	7	3897	0
36616	6	29740	1
34543	4	5520	0
36442	4	25951	1
4319	4	13874	0
37387	0	32217	1
10813	9	21662	0
36953	0	2809	1
23632	1	8458	0
38067	0	13873	1
21613	1	36454	0
36997	2	7519	1
1549	8	17017	0
37958	2	37192	1
37912	8	36972	0
37958	2	13549	1
23339	6	20235	0
37974	0	21858	1
22196	9	19545	0
36991	6	37836	1
35951	3	32058	0
36912	4	27211	1
6509	6	29044	0
36912	6	17868	1
19426	8	27255	0
36450	3	37436	1
1297	5	3385	0
36450	2	18945	1
1026	7	32475	0
36450	9	3352	1
15689	7	31130	0
36777	2	31569	1
25257	7	29198	0
37089	3	10978	1
14496	10	37749	0
37695	2	21408	1
33637	2	21681	0
37695	2	11401	1
971	7	6122	0
38135	2	16236	1
27802	2	18266	0
37167	9	3742	1
12158	3	30306	0
36475	0	5117	1
7693	3	14342	0
37871	6	7605	1
3440	9	9061	0
36872	0	3303	1
38049	2	32058	0
36872	2	25476	1
9794	4	5244	0
36872	2	16656	1
33637	1	37004	0
36872	2	32635	1
7987	8	18567	0
37756	0	21858	1
1009	5	18074	0
37334	0	27546	1
4746	7	19426	0
37334	2	13584	1
20695	6	3063	0
37168	2	30788	1
31463	2	5851	0
38037	0	35856	1
31130	4	15986	0
37293	0	21858	1
31380	1	37531	0
36569	0	18455	1
38065	4	13875	0
37049	8	36531	1
2388	10	31551	0
37832	0	38036	1
13190	4	8545	0
37832	3	7911	1
10134	4	38137	0
37815	1	14804	1
8119	4	13802	0
37937	2	4213	1
37873	4	4095	0
37937	2	21081	1
2323	5	37482	0
37383	2	38053	1
10773	2	8296	0
37383	2	25052	1
4372	1	29595	0
37383	2	18446	1
22370	1	19326	0
37383	2	2374	1
22066	4	4300	0
37383	2	37145	1
22370	6	30070	0
37383	2	22065	1
16728	7	19426	0
37383	2	29784	1
31463	1	3063	0
37383	2	6599	1
29122	6	11782	0
37383	2	24671	1
31381	7	27817	0
37383	2	19598	1
33334	4	31283	0
37383	2	32975	1
22196	6	37875	0
37383	2	25449	1
11742	1	1344	0
37383	2	6489	1
29426	5	21789	0
37383	2	14752	1
37299	3	27897	0
37383	2	12417	1
19347	6	31144	0
37383	2	33492	1
16794	6	19052	0
37383	2	6496	1
37106	0	12158	0
36789	0	21858	1
7576	10	27610	0
36672	0	36497	1
8296	7	12439	0
37199	4	33177	1
28273	10	9840	0
37284	0	21858	1
19326	6	30294	0
37284	6	2338	1
13153	6	16373	0
37284	6	1572	1
15252	3	9061	0
36487	6	4134	1
9794	0	8623	0
36487	6	23862	1
36942	6	33462	0
36487	6	12437	1
8296	4	3197	0
36490	0	2293	1
3897	10	8119	0
36642	2	31835	1
12986	7	37912	0
36642	2	12698	1
7275	5	3385	0
36642	2	7713	1
27640	4	19117	0
37710	2	23707	1
9313	6	3450	0
37649	2	1408	1
8623	2	5191	0
37716	2	32210	1
9486	9	887	0
37028	6	36862	1
4382	8	10134	0
37267	3	20389	1
36118	7	34117	0
36824	0	26857	1
22370	9	29595	0
37473	5	20325	1
26764	9	3987	0
36589	8	16346	1
11782	3	35640	0
37291	3	25051	1
17082	0	7987	0
38104	2	33517	1
30070	3	5520	0
37356	1	34276	1
29588	0	12986	0
37831	4	29789	1
25436	3	35514	0
37831	2	17546	1
37781	2	9129	0
37831	2	17077	1
2807	2	6492	0
37831	5	8492	1
38118	5	10134	0
37831	5	23346	1
18567	5	105	0
36841	3	6986	1
10813	6	17017	0
36454	6	26412	1
17690	1	29588	0
37248	6	14442	1
29226	3	38040	0
37608	0	31363	1
27817	6	4973	0
37608	2	24337	1
15689	3	36972	0
36512	3	38011	1
6169	5	21599	0
36718	0	8666	1
9604	3	5124	0
37854	4	14826	1
14298	9	12986	0
37407	0	31462	1
21681	3	34974	0
37454	0	9258	1
10773	8	2947	0
36725	0	30255	1
25578	5	25578	0
36480	1	28032	1
35640	5	15650	0
37464	0	13800	1
30387	4	18266	0
37874	8	37467	1
31904	8	15689	0
38040	2	16310	1
3306	9	3349	0
37855	0	19436	1
887	8	5851	0
36927	0	19527	1
26486	3	31910	0
36927	6	33317	1
12564	10	25360	0
36927	6	9914	1
3440	4	2104	0
37261	6	36512	1
13874	7	32058	0
37296	0	26005	1
30552	8	26764	0
37942	2	21013	1
31798	6	35951	0
37826	2	37826	1
27497	7	25572	0
36488	0	38153	1
17760	7	5410	0
37476	0	15004	1
37365	6	8623	0
37586	4	6983	1
10923	6	3339	0
36958	6	7661	1
36940	5	9313	0
36958	6	31351	1
22047	7	12986	0
36640	0	9603	1
37911	6	1149	0
38114	2	27613	1
12986	2	12986	0
37014	2	16709	1
343	8	31904	0
37448	0	24660	1
25300	0	10813	0
37448	2	11605	1
19676	4	36477	0
37286	6	20731	1
13190	7	33334	0
36533	2	12549	1
35459	2	37749	0
36533	2	36780	1
19640	0	15514	0
36533	2	35853	1
19358	10	12158	0
36533	2	29649	1
13190	2	25185	0
36533	5	18564	1
30552	2	36118	0
36533	2	16852	1
28176	1	23632	0
36775	0	19759	1
31113	8	33054	0
37761	2	10467	1
36940	8	8119	0
37761	2	1942	1
11742	0	36552	0
37069	0	14810	1
9604	7	19117	0
37680	6	28437	1
36471	2	26281	0
37680	6	26317	1
19347	6	6545	0
37680	6	21817	1
5314	6	29588	0
37680	6	34667	1
11392	6	11129	0
37282	5	12083	1
37601	10	17690	0
36483	6	12661	1
29588	10	8041	0
37546	4	7918	1
32872	6	15368	0
36853	0	19720	1
37406	5	24398	0
36785	3	31130	1
35459	2	28221	0
36637	4	1404	1
16747	10	37478	0
37353	0	9612	1
422	7	4966	0
37497	0	19088	1
13676	0	22047	0
37083	2	19321	1
14496	6	36983	0
37083	2	29085	1
31910	5	4447	0
37083	2	7377	1
25432	9	18074	0
37083	2	36828	1
3987	3	34035	0
37083	2	33120	1
34974	1	26526	0
37083	2	37711	1
3897	9	20235	0
37083	2	36604	1
16563	2	37814	0
37083	2	3590	1
14973	3	36608	0
37083	2	35764	1
7922	0	16471	0
37083	2	10551	1
5404	7	36620	0
37952	0	15223	1
2323	1	36852	0
36729	2	1487	1
12561	7	15712	0
37768	3	16206	1
10920	8	29426	0
36835	9	3283	1
33719	9	3385	0
36835	9	16521	1
5495	1	12439	0
37797	5	2682	1
20695	5	19640	0
36778	2	24444	1
23035	8	10887	0
36781	2	1748	1
3197	4	4746	0
36781	2	19085	1
21376	7	2465	0
36781	2	38006	1
9604	9	37601	0
37023	0	24574	1
7987	1	4000	0
37453	8	36636	1
19117	6	27897	0
36992	3	1501	1
14609	0	18053	0
37593	0	19527	1
27497	6	21195	0
36446	2	15149	1
517	0	13874	0
36611	2	14715	1
10773	6	12999	0
37260	2	10361	1
4319	8	36620	0
36700	3	23728	1
288	9	1549	0
36686	6	19073	1
31144	3	3820	0
37434	2	31751	1
31381	9	31606	0
37434	2	2411	1
10910	6	10313	0
38085	0	32555	1
14002	8	10887	0
36825	2	5616	1
33317	2	37873	0
36825	2	28871	1
7576	8	17017	0
37019	8	32652	1
15870	6	1549	0
37019	5	4979	1
12775	6	29198	0
38072	0	23807	1
5093	5	14685	0
36574	0	10011	1
38137	4	2019	0
36574	3	37935	1
22196	10	24087	0
36597	6	12370	1
6920	2	19545	0
36597	6	26336	1
29121	4	8480	0
37576	0	2060	1
30070	2	38128	0
37576	3	30610	1
31239	10	2524	0
37004	2	10041	1
8966	3	36477	0
36989	4	36617	1
29341	4	32872	0
36989	5	36982	1
29226	9	38145	0
36989	5	36938	1
9313	9	19232	0
38015	4	16534	1
2807	9	35972	0
36791	5	574	1
22799	9	18804	0
37549	4	32349	1
34897	8	18009	0
37549	5	14330	1
27664	7	37531	0
36546	5	37199	1
18195	4	5191	0
37122	2	28506	1
14499	0	3987	0
36852	2	33650	1
22370	8	37589	0
37438	2	28903	1
36864	9	16022	0
37587	0	36660	1
27802	6	37589	0
36671	0	37216	1
28568	5	36471	0
36977	3	37261	1
105	4	29044	0
36977	10	27084	1
16856	0	18306	0
36977	5	26202	1
14342	4	27912	0
37057	0	36577	1
29152	1	10516	0
38137	0	14810	1
11129	0	2388	0
36737	4	16515	1
25572	8	7693	0
38039	4	5702	1
37050	9	18680	0
37397	0	22429	1
19161	3	19722	0
37312	5	15207	1
29044	9	18567	0
37835	3	3641	1
18053	6	346	0
37040	5	1716	1
37410	3	35972	0
36899	3	37706	1
17760	1	25432	0
37840	2	5601	1
37478	3	20800	0
37229	8	13853	1
31380	3	37531	0
37515	2	25199	1
7922	1	10747	0
37052	0	14639	1
29588	1	4609	0
37357	0	23693	1
10578	3	37379	0
37394	3	6493	1
6007	4	26750	0
37285	0	23621	1
18311	6	4319	0
38056	3	37817	1
38040	2	27640	0
37077	0	24684	1
19326	8	25360	0
37725	0	24045	1
15832	9	13675	0
37779	4	21016	1
22066	9	25185	0
37779	5	6870	1
30197	5	37886	0
36828	6	20076	1
38128	9	25360	0
37731	1	16794	1
28221	2	7168	0
37399	0	22010	1
36477	8	161	0
37399	5	19861	1
37502	7	18074	0
36520	0	16379	1
37742	8	37589	0
37770	0	24877	1
4300	3	26486	0
36712	0	37992	1
887	2	23632	0
37465	0	37433	1
37786	6	10463	0
36942	3	37489	1
34730	7	14342	0
37955	2	17774	1
37749	2	37197	0
36524	8	38043	1
33719	3	1297	0
36524	5	37349	1
26486	4	13948	0
38091	2	17742	1
16659	3	15476	0
38091	2	10734	1
14154	6	36516	0
36485	2	19270	1
21376	0	23339	0
36485	2	12548	1
1297	3	31144	0
37737	0	33950	1
33317	10	26764	0
36705	3	2278	1
26526	3	8966	0
37842	2	17584	1
3440	9	12437	0
36604	3	7847	1
20800	7	1897	0
38016	1	20653	1
33027	2	22370	0
37446	2	9781	1
31760	7	12858	0
37446	2	7928	1
13779	9	34035	0
37852	0	10011	1
14780	0	10516	0
37331	3	37775	1
9129	6	13779	0
37331	6	36452	1
105	8	9840	0
37331	6	31005	1
31381	7	37050	0
37331	6	16838	1
3306	6	11824	0
37457	0	4595	1
33462	5	10313	0
37653	0	8832	1
28943	7	13434	0
37339	0	9798	1
5410	1	9061	0
38096	2	15132	1
19676	0	29198	0
37123	0	19527	1
37406	3	23035	0
37821	3	37197	1
6141	6	13591	0
36738	3	24708	1
15075	6	30387	0
36436	5	822	1
10923	3	18195	0
36436	5	9243	1
31239	4	6920	0
36910	0	2060	1
30648	3	501	0
36507	2	33677	1
36972	3	4000	0
37299	2	22064	1
27912	4	15832	0
37506	8	20695	1
37004	9	7816	0
37506	5	35081	1
33027	5	8034	0
37506	5	30481	1
16450	9	1297	0
37850	2	34198	1
2947	5	25921	0
37439	5	22268	1
13591	2	24556	0
37439	5	35784	1
19358	3	15712	0
37697	0	28440	1
887	0	5660	0
36567	2	15695	1
37886	1	26764	0
37810	3	2928	1
7693	1	18680	0
37886	5	4977	1
34846	0	36552	0
38147	3	23547	1
3897	9	37589	0
37523	6	22072	1
37814	2	36620	0
36566	0	27507	1
15980	1	15832	0
36439	3	22422	1
12439	8	9252	0
36439	6	19880	1
27800	5	7922	0
37358	0	13401	1
37482	10	15980	0
36522	3	24596	1
3810	8	36972	0
36522	6	27945	1
36584	9	24087	0
36522	6	2152	1
6920	3	20978	0
37509	6	37351	1
28176	0	2807	0
37509	6	34995	1
12561	5	17760	0
37423	0	36507	1
25572	2	35640	0
37631	3	2332	1
16563	9	36702	0
36677	2	37850	1
25360	6	18270	0
38071	2	24748	1
15689	10	24087	0
38071	2	36274	1
29141	10	31551	0
36693	6	19584	1
26844	4	24829	0
36693	6	15210	1
18009	9	34035	0
37367	0	21733	1
16118	5	5410	0
37367	2	18044	1
19093	0	17320	0
37367	2	13064	1
25742	6	36118	0
36459	3	36493	1
10920	8	26750	0
37753	2	12354	1
37478	2	6122	0
37460	2	36632	1
7693	0	23693	0
36497	2	37763	1
19117	4	18311	0
38118	2	6846	1
18311	9	8041	0
36664	2	32703	1
17690	6	21613	0
37908	0	5664	1
37814	6	11863	0
37402	6	36056	1
31904	6	2472	0
37223	3	4313	1
19052	10	8119	0
37195	0	37083	1
15650	7	25572	0
37382	3	605	1
38128	4	10516	0
37665	6	28346	1
28045	5	38137	0
36476	4	36826	1
13676	2	37814	0
36889	4	22206	1
11742	6	8193	0
36809	2	15412	1
29121	5	1026	0
36809	2	13115	1
105	7	10923	0
36743	5	32485	1
23632	3	31380	0
36444	2	11719	1
14342	9	2019	0
37410	0	26488	1
7576	8	33334	0
37548	3	37563	1
37528	4	18567	0
36644	2	16221	1
29044	2	31692	0
36644	2	37444	1
14554	9	3877	0
36644	2	13750	1
27800	10	13875	0
37058	0	896	1
12564	4	25247	0
36707	0	732	1
4609	5	18311	0
36900	2	3852	1
14747	1	6122	0
37421	3	37388	1
20235	1	30648	0
37788	0	1474	1
28273	9	36972	0
37466	5	35237	1
343	6	21083	0
37466	5	14136	1
21613	0	27897	0
37466	10	4360	1
37596	8	32475	0
38007	3	26596	1
36422	7	23881	0
37055	0	24789	1
36702	2	5244	0
37305	0	14639	1
2472	4	9840	0
36532	0	8462	1
25572	10	24398	0
37664	0	19754	1
25596	5	8119	0
37913	4	22131	1
6440	1	35459	0
36864	0	37407	1
16424	2	21739	0
37440	0	24854	1
1897	2	28045	0
37440	5	20648	1
19426	8	32876	0
37498	0	13647	1
37502	7	10910	0
37498	0	36254	1
37886	6	36632	0
38019	6	26709	1
24398	2	7693	0
37750	6	35059	1
19426	2	13215	0
38048	2	10773	1
36861	6	30294	0
37999	2	36497	1
29122	0	11782	0
37999	2	23508	1
36864	1	33027	0
37999	2	19004	1
14154	3	2472	0
37705	2	23076	1
887	8	2807	0
37688	0	5293	1
14685	6	21662	0
37688	2	33765	1
16196	0	34730	0
37688	2	32159	1
24747	8	31856	0
37688	2	26545	1
15712	0	37513	0
37688	2	25965	1
19426	0	25484	0
37688	2	35977	1
2556	0	24087	0
37349	5	18363	1
10773	7	37589	0
37349	5	19446	1
26864	5	31283	0
37349	5	32192	1
16471	0	11129	0
37349	5	26238	1
13948	10	8545	0
37268	0	10574	1
6545	1	34543	0
37222	2	17016	1
2947	7	37601	0
37222	2	36420	1
21739	9	36574	0
37411	6	5690	1
4973	4	34117	0
36646	3	23728	1
4966	5	30070	0
36435	5	20508	1
3339	6	36516	0
37414	1	15712	1
14973	6	34543	0
37573	3	7730	1
1897	5	37873	0
36618	0	15335	1
12564	0	25360	0
37202	0	38036	1
16196	8	9107	0
36433	0	23113	1
30825	0	10920	0
36433	9	15707	1
14685	2	18266	0
36433	9	14965	1
4609	4	22047	0
37275	0	24897	1
36988	3	7816	0
38045	5	18544	1
23881	7	30552	0
38045	5	37021	1
29426	8	8768	0
38045	5	8705	1
31239	6	11648	0
36861	2	10782	1
37050	4	2323	0
36861	2	16287	1
37589	5	14647	0
37916	0	17220	1
6141	10	37916	0
37712	6	17869	1
3987	8	15980	0
36649	2	17915	1
44	2	30070	0
36716	5	22200	1
5324	2	18009	0
37773	2	15032	1
25572	2	37482	0
37210	4	18196	1
7816	0	3385	0
36826	5	2883	1
10463	4	28525	0
36826	5	34705	1
971	3	34035	0
36826	10	19007	1
29198	1	4123	0
36928	0	36903	1
13779	1	32876	0
37494	0	10626	1
19358	0	887	0
36917	0	21376	1
17320	9	23566	0
36917	2	21988	1
2465	9	13779	0
36995	0	26132	1
26486	7	20235	0
36950	0	7858	1
13874	10	31692	0
37297	0	27656	1
5124	0	29044	0
37707	3	23728	1
4025	2	33317	0
36587	5	27014	1
26844	6	19722	0
37504	6	10555	1
13779	3	2556	0
38051	0	38017	1
20978	0	6141	0
38051	2	2983	1
30833	0	33248	0
37658	3	754	1
16022	10	3820	0
38103	0	28418	1
24747	3	3385	0
38103	2	2072	1
1711	10	14154	0
37352	0	27546	1
15438	10	31798	0
37510	3	36506	1
15650	0	7211	0
36726	1	36648	1
36445	0	37410	0
38105	0	35344	1
5660	8	3254	0
38105	2	32356	1
21789	6	23843	0
37193	3	38149	1
10773	0	18053	0
37677	3	34466	1
28568	4	343	0
36537	0	2371	1
7299	4	3810	0
37012	8	38135	1
23436	2	18311	0
36489	0	36024	1
21376	6	288	0
36832	0	13830	1
15022	6	27470	0
36832	3	7730	1
17082	9	31798	0
37723	0	23731	1
22799	4	11065	0
37723	4	22777	1
161	4	422	0
36550	0	36531	1
34035	4	12439	0
36761	2	15969	1
10920	5	3385	0
37239	2	24197	1
38118	9	24398	0
37239	5	30000	1
13676	8	4891	0
37636	0	14228	1
36983	4	35972	0
37279	1	23431	1
37873	0	16902	0
37800	4	9976	1
11129	0	37513	0
37847	0	22328	1
37528	10	37601	0
38107	0	37417	1
4609	8	23436	0
37217	2	4182	1
34846	8	33719	0
37976	0	8808	1
11925	3	34846	0
36923	4	25820	1
17690	5	27640	0
37959	0	791	1
37555	5	15980	0
36561	0	12847	1
422	10	29595	0
37553	2	30011	1
14298	0	27897	0
36833	0	35231	1
19347	2	27840	0
37857	0	6454	1
6716	6	37589	0
37078	0	5329	1
6492	0	18074	0
37078	3	11893	1
36861	5	11141	0
37143	0	3636	1
36218	3	14499	0
37595	1	13127	1
27497	0	16902	0
37080	0	36497	1
36516	8	17690	0
36876	0	18521	1
25360	3	30825	0
37302	5	16105	1
2323	7	34117	0
37157	1	7205	1
32058	2	23436	0
37108	0	7214	1
36471	5	23436	0
37396	6	21392	1
13485	5	8768	0
36526	2	8265	1
36983	5	29121	0
36526	2	1087	1
14604	8	19545	0
37362	0	10484	1
16118	1	12861	0
38022	0	24834	1
31582	8	34897	0
36549	6	15215	1
12725	8	36471	0
38029	2	35252	1
19117	10	4891	0
37132	0	37347	1
1711	6	37528	0
37132	1	16794	1
21739	1	11756	0
36568	0	12760	1
12986	2	10578	0
37224	4	36552	1
346	7	10532	0
37948	0	4251	1
13162	3	12437	0
37948	6	32706	1
32876	1	21376	0
36871	0	15826	1
14298	6	4000	0
36479	3	34007	1
15368	10	10313	0
38077	3	36929	1
34035	4	37786	0
38077	6	36493	1
24438	4	17844	0
38144	2	18398	1
4447	0	31239	0
38144	9	7584	1
7693	4	13675	0
38144	9	8265	1
4025	8	18009	0
38144	9	8635	1
5851	8	16424	0
36667	2	14986	1
10920	9	2725	0
36667	2	26724	1
19640	7	5851	0
38011	6	37428	1
22370	1	21376	0
38011	6	25693	1
6141	7	15689	0
36808	0	30635	1
3810	1	19093	0
37846	2	8320	1
37814	1	15689	0
37034	2	5749	1
26281	0	9840	0
36838	0	21578	1
10887	9	2019	0
36838	2	27803	1
29588	7	105	0
36810	0	12847	1
11648	1	25185	0
37967	4	36780	1
31606	9	24398	0
37536	0	37168	1
2019	2	31582	0
36652	2	28443	1
105	9	10532	0
37088	1	23431	1
25432	0	13162	0
37220	8	25879	1
16747	4	6122	0
37360	0	36749	1
32905	1	13948	0
36603	0	16897	1
10773	6	9604	0
37134	5	32870	1
5324	5	36218	0
37134	5	13926	1
18804	9	18009	0
37134	5	10858	1
19081	4	13675	0
36692	0	27726	1
37692	4	12725	0
36692	3	27880	1
3820	8	8193	0
37093	2	36305	1
30387	4	14647	0
37769	8	32652	1
2725	8	29198	0
37769	4	36826	1
28525	9	20235	0
37447	0	19720	1
25432	4	37513	0
37447	2	28216	1
11392	4	7922	0
37447	2	34865	1
38040	4	37912	0
36591	4	33064	1
27912	10	33317	0
36998	4	16267	1
4123	9	21681	0
36998	9	36074	1
10313	9	6980	0
38109	2	28566	1
24578	4	9252	0
38116	5	3190	1
36454	3	12999	0
38116	5	9057	1
6169	10	36864	0
36768	0	14611	1
23843	1	30825	0
37000	1	16794	1
4300	4	25185	0
37765	2	32448	1
19545	5	8296	0
37734	2	5800	1
36988	5	27470	0
37526	3	37706	1
37531	6	9486	0
37485	0	37035	1
36552	4	36988	0
38017	2	38051	1
31480	9	28221	0
38006	2	19550	1
5576	0	29044	0
38006	2	32820	1
19358	1	10910	0
36624	6	32674	1
37066	1	37106	0
37589	0	18922	1
29595	10	4811	0
37377	3	37848	1
5576	2	18053	0
37844	8	25354	1
32475	5	19358	0
37659	4	7083	1
37896	1	36831	0
37905	0	15443	1
3897	9	36584	0
37158	8	21977	1
37781	10	10813	0
38132	2	13926	1
17797	3	2229	0
38133	9	18121	1
37038	4	2104	0
36585	6	8127	1
24796	6	9252	0
36658	3	11609	1
19918	1	25484	0
37792	0	3554	1
36454	3	17082	0
36758	6	29963	1
9037	0	29595	0
36770	2	33044	1
17625	0	36552	0
36786	3	36869	1
37066	5	19358	0
36534	0	32555	1
17797	2	32475	0
36990	3	26928	1
37797	0	8314	0
36975	0	37936	1
25432	10	28176	0
36498	2	25230	1
29226	2	23566	0
38098	0	17292	1
23339	8	30387	0
36441	0	35770	1
18804	6	11824	0
37068	4	33818	1
15075	4	288	0
37068	5	36994	1
11925	9	8034	0
37068	5	5670	1
37410	0	6787	0
37068	5	36523	1
19407	8	8193	0
37066	1	10068	1
36471	2	38049	0
38153	0	20685	1
37004	5	4372	0
36698	0	19527	1
37866	6	25436	0
37115	3	10863	1
14973	9	18776	0
37620	1	1590	1
1094	10	12725	0
37729	2	36518	1
8966	5	16450	0
36494	0	10309	1
5576	5	19093	0
37163	0	13830	1
13153	1	34974	0
36812	0	37083	1
18009	3	18804	0
37442	9	11718	1
36574	0	37038	0
37442	9	615	1
3349	1	18306	0
37698	3	6021	1
37482	8	23693	0
36819	5	7708	1
4609	9	10923	0
37467	0	14874	1
8034	7	1344	0
37914	0	36024	1
33462	8	2388	0
36491	0	8588	1
16902	2	25742	0
37639	0	9557	1
8119	5	10773	0
37639	6	30608	1
2524	7	32876	0
37639	6	16023	1
12725	6	36702	0
36581	3	31537	1
12561	7	10910	0
36606	3	23214	1
17760	2	16118	0
37657	6	27726	1
23693	0	18009	0
37657	6	37848	1
15368	7	15252	0
36932	0	18455	1
12986	7	1149	0
36805	0	37802	1
10747	8	17797	0
36727	4	30693	1
21662	10	14604	0
37633	5	32915	1
11648	0	34035	0
36499	5	4748	1
2465	3	22196	0
38123	0	11068	1
7016	9	6492	0
37221	2	29605	1
10887	4	11824	0
36601	6	26924	1
27855	10	24796	0
37841	6	35326	1
10887	10	27817	0
37979	6	37543	1
22370	9	3197	0
37794	5	36717	1
30825	3	5520	0
37391	0	23149	1
38145	3	1711	0
37036	0	30150	1
31239	9	21376	0
37818	0	9615	1
37406	8	24829	0
36831	0	1484	1
37382	8	25742	0
37298	4	14467	1
37050	3	37406	0
37298	4	31988	1
14554	4	33317	0
37610	0	14810	1
11863	10	9840	0
37610	3	29805	1
16373	9	10920	0
36668	6	26852	1
23339	2	21376	0
37044	6	37036	1
19161	5	19161	0
37375	0	36763	1
26750	5	15022	0
37225	0	21774	1
6169	2	36988	0
37225	2	23154	1
5495	3	31283	0
36622	0	37994	1
10313	10	31380	0
36622	2	17612	1
346	8	36620	0
37623	2	12004	1
36477	3	26750	0
36784	2	27190	1
8034	6	36477	0
37514	0	21858	1
14685	8	24578	0
37209	0	16611	1
37502	5	28176	0
37807	0	19041	1
17844	1	24556	0
37441	3	29805	1
18053	8	36972	0
37320	3	21949	1
13215	2	19232	0
37320	2	27714	1
30552	3	19161	0
37320	2	19776	1
35459	7	29341	0
37320	2	32933	1
3254	4	3440	0
37320	2	3790	1
37589	3	19232	0
37320	2	33906	1
13874	2	27640	0
37373	0	19527	1
27802	3	19052	0
37373	6	25892	1
28956	0	1549	0
37580	2	35180	1
29152	7	19676	0
37484	3	30512	1
8034	5	6545	0
37484	6	721	1
2465	1	19052	0
37484	6	19156	1
13676	5	10532	0
37484	6	14138	1
8545	10	31989	0
37484	6	20474	1
11824	6	14499	0
37829	0	19542	1
19161	3	14499	0
37016	0	21235	1
21662	9	37916	0
38033	2	8872	1
34543	9	25247	0
37262	5	23911	1
12725	9	37365	0
36983	8	19794	1
15712	8	8458	0
37572	4	37572	1
14342	1	13675	0
36750	0	37704	1
14604	9	10463	0
36750	4	1202	1
13591	4	3897	0
36493	3	38077	1
1620	7	30306	0
36501	2	37773	1
34897	9	23881	0
38156	3	3787	1
37749	7	19640	0
37660	3	28746	1
37749	9	13875	0
38002	2	36275	1
13675	3	16856	0
37726	3	13142	1
23843	6	7816	0
38080	3	28421	1
35921	10	21681	0
38080	5	38080	1
30648	6	13190	0
36971	1	16794	1
25360	0	4811	0
37086	0	13282	1
34543	9	13153	0
38120	3	18100	1
14604	5	6920	0
38120	2	26669	1
14647	4	27255	0
38113	2	15795	1
21681	10	7999	0
37795	6	8230	1
31692	7	5191	0
37772	3	14179	1
16902	6	16856	0
36925	3	20791	1
33317	6	13675	0
36925	6	32953	1
6101	9	6992	0
37893	2	5107	1
8545	1	36584	0
37893	2	2655	1
21789	10	422	0
36615	2	10856	1
31606	5	11782	0
36615	2	15099	1
37482	6	18306	0
38148	2	19518	1
15712	6	1026	0
38148	2	33803	1
23693	7	36422	0
36513	0	36774	1
422	4	25247	0
37926	2	16639	1
16196	2	4382	0
37926	2	5492	1
9486	9	37596	0
37038	4	30581	1
25436	5	34974	0
37341	4	37132	1
8281	4	19117	0
37067	3	29884	1
19052	2	5495	0
36607	2	30911	1
30197	2	34897	0
36746	3	1909	1
37038	10	31301	0
37428	5	21487	1
19117	9	5124	0
37798	6	35388	1
13434	6	4811	0
37849	8	2647	1
12564	3	12775	0
37849	5	10566	1
37502	5	10313	0
37749	0	17140	1
15712	9	18074	0
37749	1	15712	1
37531	0	9486	0
37920	3	10677	1
24578	6	6141	0
36842	2	28253	1
8034	2	34846	0
37583	2	30383	1
3063	5	28221	0
37547	0	2509	1
36831	2	36842	0
36470	0	21245	1
33248	0	7693	0
36634	0	11068	1
3339	6	21738	0
38046	0	31462	1
13675	1	24398	0
38046	2	18409	1
34897	1	30552	0
37906	0	32677	1
4300	0	19918	0
37507	3	37706	1
8281	1	36471	0
38111	0	30693	1
6122	5	16196	0
36793	0	36498	1
23843	2	8768	0
37550	0	29491	1
37482	9	14342	0
37395	2	29233	1
288	9	1549	0
37403	2	37627	1
37589	5	21376	0
38154	3	14149	1
30070	9	7816	0
37640	3	20397	1
4966	6	11141	0
36579	2	35580	1
31381	7	37482	0
36636	2	1979	1
21544	5	36842	0
36636	2	247	1
19640	1	32475	0
36636	2	33778	1
38118	7	16902	0
36636	2	37701	1
2725	4	13153	0
36636	2	21500	1
35951	10	4609	0
36636	2	8482	1
32876	7	37916	0
36636	2	2998	1
29122	4	16902	0
36636	2	34523	1
36632	0	14499	0
36636	2	5415	1
3440	7	12158	0
37405	1	37621	1
26526	4	14973	0
38062	0	30698	1
13874	5	22914	0
37184	5	8935	1
24087	9	37742	0
37525	0	36024	1
27640	8	27032	0
37897	0	2392	1
33246	3	17797	0
36655	5	25470	1
2323	2	37478	0
38092	0	32555	1
18776	0	34846	0
38092	3	23728	1
31239	6	13802	0
37333	3	37372	1
1861	10	29198	0
37333	2	20171	1
34897	3	2019	0
36799	3	4248	1
20695	1	7016	0
38000	2	1057	1
19347	7	13485	0
37931	4	31359	1
16118	0	33462	0
36879	0	28844	1
36861	8	8768	0
36715	2	37774	1
20800	2	3877	0
36697	0	37734	1
37365	3	15802	0
37882	4	2852	1
36942	8	15476	0
37882	2	35695	1
24747	4	4123	0
37501	8	37383	1
29152	4	8768	0
37274	5	1467	1
3897	9	28370	0
37274	5	14628	1
1512	1	10747	0
37554	4	5419	1
26764	7	20800	0
37324	0	37335	1
4746	3	14437	0
38030	3	11609	1
8623	10	1711	0
38030	6	7121	1
10773	6	36869	0
36471	0	27242	1
21376	7	4300	0
36471	2	17980	1
1620	10	1026	0
36471	2	37236	1
31130	7	22370	0
37746	6	27984	1
37589	6	26486	0
37746	6	28250	1
16659	9	30306	0
37746	6	11720	1
887	3	13875	0
37925	0	36325	1
33054	4	31551	0
37470	3	5074	1
2964	4	12564	0
37470	2	9324	1
1897	8	9107	0
36663	4	263	1
26526	10	3385	0
36753	6	31296	1
10920	8	18776	0
37727	2	20940	1
16747	3	31776	0
37727	2	16166	1
31910	3	10463	0
37752	2	3746	1
29595	3	19676	0
37273	3	37435	1
8623	3	5576	0
37273	6	17110	1
19358	0	31716	0
36862	0	24877	1
18270	2	25247	0
36862	3	37028	1
23566	1	37365	0
37561	0	35756	1
21789	7	12564	0
37056	8	36131	1
31283	8	16728	0
37056	8	9093	1
15832	6	4095	0
36806	0	27068	1
3339	3	31798	0
36806	2	20338	1
35459	8	7922	0
37126	3	31912	1
38128	3	30070	0
36648	9	5106	1
11782	10	36852	0
36648	9	5337	1
22047	4	9840	0
36648	9	4998	1
12158	10	37410	0
36648	9	9710	1
34035	8	21376	0
36648	9	7589	1
1009	3	17797	0
36648	9	18576	1
12858	9	29122	0
36648	9	29747	1
1512	8	11756	0
36648	9	7804	1
288	7	16794	0
36648	9	7316	1
16373	5	36608	0
36648	9	14445	1
25432	0	15368	0
36648	9	21511	1
36942	7	35972	0
36648	9	29711	1
36620	2	37379	0
36648	9	503	1
6545	9	29198	0
36648	9	23812	1
2465	1	16728	0
36648	9	29237	1
30552	9	7211	0
36648	9	38027	1
14604	2	31283	0
36648	9	36472	1
17082	9	15689	0
36648	9	4558	1
21824	10	18567	0
36648	9	8233	1
36852	3	1897	0
36648	9	22755	1
1512	7	25060	0
36648	9	36726	1
37004	3	27470	0
36648	9	12418	1
10813	3	1549	0
36648	9	24148	1
7299	10	15802	0
36648	9	26493	1
37004	10	20135	0
36648	9	811	1
14154	4	11863	0
36648	9	17232	1
5410	2	5851	0
36648	9	4239	1
36477	10	37866	0
36648	9	10008	1
21613	10	37601	0
37317	0	3113	1
11065	1	20800	0
37251	5	21966	1
517	6	25921	0
37251	5	3395	1
31716	3	37066	0
37752	2	32698	1
16424	6	3254	0
38082	0	10734	1
15986	2	23339	0
36874	0	22118	1
4123	2	19326	0
36874	4	35725	1
34730	10	30197	0
37834	0	25507	1
16196	4	37482	0
36756	0	31241	1
9107	4	25572	0
36660	2	37587	1
5324	4	6101	0
37592	0	12901	1
34035	0	37875	0
38004	3	6705	1
31856	0	4372	0
36800	6	11398	1
1009	0	15252	0
36432	0	36205	1
36516	9	32058	0
36744	0	38107	1
2947	2	5576	0
37070	4	24009	1
36972	6	29760	0
37070	2	36940	1
31776	2	6122	0
37596	8	38048	1
37530	8	14496	0
37596	4	15236	1
14245	9	4300	0
37885	0	9603	1
4300	6	22370	0
37885	6	36597	1
21681	5	33027	0
36926	0	17722	1
19081	1	3347	0
38122	0	24740	1
29341	5	37531	0
36736	2	30920	1
37742	6	28956	0
36505	0	32478	1
10933	4	14342	0
36505	3	37388	1
9840	9	29226	0
37560	2	14713	1
31480	10	27800	0
37560	2	11977	1
11756	6	25432	0
37529	2	37590	1
1861	7	4123	0
37529	2	30958	1
19918	1	34035	0
37443	1	35124	1
34974	5	27840	0
37045	3	36487	1
18074	5	17797	0
37045	6	1188	1
2964	4	28943	0
38068	0	11340	1
36983	10	11756	0
38068	3	29025	1
10933	8	3349	0
38081	0	13853	1
34730	7	14002	0
38081	5	37530	1
14298	8	3339	0
37029	0	31112	1
35640	7	25572	0
37029	3	37024	1
23881	10	22799	0
37743	4	3672	1
38065	6	25060	0
37896	0	19527	1
8281	6	4319	0
37896	6	4354	1
14342	1	37873	0
36868	0	5614	1
4186	5	37410	0
36563	5	38009	1
28176	8	37066	0
36517	4	27950	1
1897	6	23881	0
37870	0	29157	1
37786	9	14604	0
[truncated: 2,862 more rows]
