# Supplementary material
Source: ML conference proceedings conference paper supplement (https://proceedings.neurips.cc/paper_files/paper/2021/hash/0fd600c953cde8121262e322ef09f70e-Abstract.html)
Supplement: Supplementary file 1 [file 0fd600c953cde8121262e322ef09f70e-Supplemental.zip › Supplementary_Material_Paper_8745/data/Hamaguchi-BM_head-5000/test/test-random-sample/test5.txt]

38038	0	13590	1
844	4	15169	0
37961	2	21629	1
28943	6	6545	0
37786	2	21674	1
19640	7	27664	0
37125	0	9144	1
11065	3	2019	0
37706	6	33781	1
1512	5	16118	0
37706	6	4066	1
11392	8	30306	0
37706	2	2163	1
37406	1	37406	0
37706	6	34609	1
10920	5	14780	0
37706	6	16086	1
8768	2	3820	0
37706	6	3596	1
21824	6	1149	0
37706	6	33602	1
32475	3	20695	0
37706	6	30633	1
11487	2	2625	0
37706	6	31350	1
24574	9	7554	0
37732	8	21977	1
13153	6	36477	0
36920	0	18455	1
21739	4	36983	0
36920	6	30072	1
36552	8	13434	0
37431	0	21858	1
17017	6	37786	0
37431	3	5512	1
35921	3	26750	0
36503	9	19295	1
12870	1	10933	0
36452	6	23095	1
13779	4	28370	0
37256	6	32897	1
15712	7	37038	0
37175	0	1494	1
20978	5	11648	0
37995	0	38058	1
6440	4	6980	0
37995	2	19334	1
37814	0	31692	0
36617	5	36348	1
44	0	37896	0
36617	5	37969	1
7168	0	36983	0
36617	5	3479	1
31977	0	34590	0
36617	5	37281	1
31800	5	34974	0
37683	4	8226	1
3440	1	31480	0
37740	1	27492	1
25432	10	29141	0
36559	4	3873	1
14499	4	6992	0
37452	3	37746	1
37725	9	21509	0
37490	0	38106	1
2807	5	12861	0
36883	2	5309	1
7211	0	25572	0
36760	2	28698	1
18195	2	36702	0
36760	2	15844	1
34897	0	3987	0
37527	1	38144	1
38118	2	17256	0
37408	0	22280	1
13948	6	13779	0
37408	2	19626	1
1094	1	37365	0
37408	2	23911	1
33317	4	37555	0
37718	0	11318	1
2104	6	37596	0
37487	5	10055	1
422	6	8193	0
37412	4	34985	1
23843	10	36842	0
37820	1	2195	1
10516	5	19326	0
36614	3	13925	1
2883	4	36920	0
38095	9	20539	1
33334	10	5495	0
38095	9	20083	1
4300	0	8296	0
37676	0	12847	1
4319	1	11863	0
36552	5	7602	1
29760	5	343	0
36552	5	6623	1
32186	5	37411	0
37351	0	23693	1
24398	9	11065	0
37351	3	37509	1
7016	6	1026	0
37351	6	20995	1
3063	1	37106	0
36795	1	6886	1
19117	9	7299	0
36690	0	36504	1
29426	4	21544	0
38078	6	4844	1
23693	6	2019	0
36495	2	10254	1
16728	5	16728	0
36495	2	37611	1
12986	10	16563	0
36495	2	38140	1
30648	1	30387	0
36495	2	12686	1
21613	8	37299	0
36495	2	4171	1
32905	7	3197	0
36495	2	30916	1
25596	10	3197	0
36495	2	11884	1
2069	1	20484	0
37996	0	32555	1
6980	0	32872	0
37663	1	26796	1
38149	1	9755	0
37475	2	20536	1
2229	4	1009	0
36632	2	27167	1
4300	3	10813	0
37144	3	1033	1
9313	0	25185	0
37099	6	13451	1
4300	9	36940	0
37099	6	37402	1
36702	10	31904	0
37099	6	7680	1
5324	4	4382	0
37099	6	7730	1
14496	3	13875	0
37099	6	26613	1
14973	5	161	0
37868	0	11719	1
10920	6	36842	0
37278	0	26360	1
30070	8	19676	0
36966	2	36580	1
16373	2	5520	0
37899	3	4039	1
9562	10	8033	0
37458	0	38036	1
24574	8	22481	0
36678	6	36965	1
11756	8	28176	0
38042	2	29551	1
16118	10	11392	0
36817	2	34279	1
36632	3	36632	0
36817	2	11428	1
1861	5	34543	0
36817	2	32167	1
37912	7	27032	0
36817	2	27904	1
22050	5	36831	0
36817	2	36780	1
37478	0	34035	0
37424	2	10914	1
38049	7	7299	0
38142	2	16206	1
6716	4	5495	0
37962	0	1494	1
422	2	4811	0
36898	3	7692	1
14647	2	298	0
37469	3	37715	1
24747	5	3385	0
37340	0	37465	1
8033	2	7554	0
37187	2	24954	1
37866	0	6545	0
36869	3	27796	1
31381	10	16902	0
36869	6	15409	1
32475	9	9061	0
36869	6	31981	1
32186	6	24325	0
36869	6	13404	1
2104	5	37596	0
36869	6	16754	1
36972	1	29588	0
36869	6	23520	1
8193	6	36842	0
36869	6	26232	1
3877	5	38149	0
36869	6	16304	1
8041	10	37912	0
36869	6	32400	1
9635	8	5867	0
36869	6	19036	1
12999	0	26281	0
36869	6	258	1
31113	2	1620	0
37877	0	10011	1
25413	5	3770	0
36804	2	18529	1
22066	7	10773	0
36555	0	19527	1
28221	7	2229	0
36731	0	36325	1
8458	9	14496	0
36731	3	27635	1
12724	6	34928	0
36610	0	37417	1
28176	10	11129	0
37164	0	11068	1
21739	10	15476	0
38024	6	5783	1
37050	8	36920	0
36930	4	36617	1
2465	6	37875	0
36887	5	11430	1
37050	4	2625	0
36887	9	13402	1
36972	9	28568	0
36792	2	23735	1
10578	0	29588	0
36792	2	16473	1
32872	9	11129	0
36696	3	11628	1
37786	8	10463	0
37721	0	18977	1
15252	1	15514	0
37721	1	25201	1
9486	3	37038	0
36734	2	7578	1
12034	2	23441	0
38013	5	25160	1
27640	7	5244	0
36984	4	22206	1
8314	8	25572	0
36823	2	21925	1
4025	7	37724	0
36675	6	35645	1
9562	1	37908	0
36675	6	24081	1
6169	7	15022	0
37182	4	18196	1
37886	1	37873	0
37314	0	14810	1
36454	10	9794	0
37939	1	5235	1
19347	4	16793	0
37571	3	37755	1
31606	9	33248	0
37084	0	4944	1
36842	6	16022	0
36757	0	36711	1
14298	1	38049	0
37520	0	28714	1
8041	9	1094	0
36639	4	1401	1
7299	6	21824	0
36993	6	19453	1
36864	10	1297	0
38066	3	34899	1
36632	4	31606	0
37148	0	25641	1
105	2	22914	0
37374	0	37899	1
19347	4	30294	0
38005	8	29602	1
19426	3	8296	0
38005	1	10068	1
15650	0	24398	0
37345	0	12847	1
8768	8	37866	0
37345	3	34059	1
34897	9	37724	0
37936	2	20271	1
3440	0	27800	0
37936	2	5195	1
18311	3	37911	0
36515	0	1898	1
3339	10	5124	0
38130	2	25805	1
27840	7	33027	0
37598	0	3113	1
9252	7	13190	0
37145	8	37383	1
33462	9	36574	0
37609	4	23903	1
20135	6	7438	0
37109	0	31363	1
14609	3	36471	0
37429	2	37187	1
31692	6	14154	0
36924	0	14810	1
24438	5	26534	0
37059	0	28682	1
37908	9	38118	0
38065	8	20695	1
25596	4	31910	0
38065	5	18780	1
6007	1	33027	0
38065	5	35081	1
16728	0	36940	0
37667	2	26005	1
23436	6	12999	0
37190	2	5549	1
19117	4	15689	0
37190	2	18069	1
16728	2	27255	0
37748	0	2060	1
31283	1	6141	0
37748	6	36331	1
6440	0	2229	0
37634	2	9024	1
31130	0	31989	0
37655	6	31042	1
14611	10	31977	0
37371	4	37371	1
23339	10	13215	0
36635	6	29654	1
30387	3	20978	0
37241	4	28335	1
10058	1	12724	0
36904	0	37497	1
33334	8	4746	0
36794	0	26288	1
37677	3	34117	0
36711	2	31747	1
15252	3	12158	0
36711	2	27355	1
26764	7	11782	0
36502	0	31636	1
11065	0	27817	0
37530	4	38081	1
21509	2	12377	0
38055	3	10755	1
3820	0	36477	0
36963	1	37784	1
36940	8	6716	0
36612	2	1646	1
24249	3	7978	0
36612	2	37230	1
3877	1	36920	0
36612	2	13556	1
33248	8	33248	0
37155	9	37919	1
10920	5	7999	0
37537	2	6960	1
10747	9	8480	0
37591	1	29429	1
14588	3	37475	0
36752	4	19859	1
16450	3	29595	0
36684	9	8113	1
26844	3	31381	0
36684	9	13617	1
8296	2	7576	0
36684	9	37125	1
27610	6	501	0
37418	5	14347	1
27802	3	9129	0
36474	3	5808	1
28221	7	35459	0
37385	5	31953	1
8545	1	24796	0
37385	5	10127	1
10887	9	37886	0
36699	6	21744	1
2388	7	16659	0
37544	5	7397	1
15472	0	14611	0
36424	2	31979	1
37725	2	25225	0
36575	9	3604	1
2524	1	16728	0
36575	9	22163	1
25257	4	36477	0
37888	3	37564	1
14499	4	14342	0
37265	0	24740	1
2465	3	4746	0
38119	0	28996	1
11487	2	37050	0
36840	5	23132	1
6920	0	19545	0
38031	4	36669	1
6716	4	22370	0
38031	5	20495	1
17760	2	33246	0
37535	8	21769	1
4811	2	36861	0
37315	5	12259	1
35459	2	12158	0
36590	0	12847	1
29341	5	31551	0
37579	0	12847	1
29595	0	1297	0
37567	0	23375	1
2229	9	31301	0
36530	2	22057	1
7211	6	8900	0
37669	3	38025	1
10920	1	27470	0
37115	4	33818	1
11487	5	34928	0
37115	3	30954	1
13390	9	20484	0
37115	5	30981	1
12034	4	38089	0
37115	5	7828	1
28176	7	10747	0
37301	0	6454	1
3349	1	14342	0
38128	0	9557	1
35640	0	38118	0
36616	6	29740	1
3897	1	37875	0
36442	4	25951	1
7275	10	7816	0
37387	0	32217	1
13676	7	6509	0
36953	0	2809	1
19722	4	36632	0
38067	0	13873	1
32876	5	25484	0
36997	2	7519	1
30197	4	37478	0
37958	2	37192	1
15121	10	37908	0
37958	2	13549	1
9061	7	25432	0
37974	0	21858	1
29141	1	28176	0
36991	6	37836	1
29044	3	4319	0
36912	4	27211	1
37916	8	15689	0
36912	6	17868	1
34035	4	6992	0
36450	3	37436	1
22799	6	10887	0
36450	2	18945	1
37596	0	887	0
36450	9	3352	1
30507	6	26568	0
36777	2	31569	1
29426	3	19407	0
37089	3	10978	1
5867	10	37770	0
37695	2	21408	1
4447	3	15870	0
37695	2	11401	1
14780	4	422	0
38135	2	16236	1
12443	1	8454	0
37167	9	3742	1
6122	2	37555	0
36475	0	5117	1
36574	0	11392	0
37871	6	7605	1
23436	1	28273	0
36872	0	3303	1
29755	9	32186	0
36872	2	25476	1
8033	6	23035	0
36872	2	16656	1
5660	4	32475	0
36872	2	32635	1
31130	10	11648	0
37756	0	21858	1
11782	1	33248	0
37334	0	27546	1
3349	9	33317	0
37334	2	13584	1
31582	0	19161	0
37168	2	30788	1
31560	7	346	0
38037	0	35856	1
6545	10	1344	0
37293	0	21858	1
24325	9	9755	0
36569	0	18455	1
1693	1	14611	0
37049	8	36531	1
18680	9	31381	0
37832	0	38036	1
13390	1	36920	0
37832	3	7911	1
3339	2	7987	0
37815	1	14804	1
37004	2	1297	0
37937	2	4213	1
31798	4	5124	0
37937	2	21081	1
3877	8	29755	0
37383	2	38053	1
17844	8	24796	0
37383	2	25052	1
25596	0	9252	0
37383	2	18446	1
14298	1	37379	0
37383	2	2374	1
12775	6	44	0
37383	2	37145	1
33317	10	3306	0
37383	2	22065	1
36527	7	18650	0
37383	2	29784	1
25060	4	16118	0
37383	2	6599	1
11742	9	4966	0
37383	2	24671	1
35972	0	13162	0
37383	2	19598	1
5444	10	14647	0
37383	2	32975	1
9313	3	14685	0
37383	2	25449	1
4447	9	28956	0
37383	2	6489	1
25436	9	13485	0
37383	2	14752	1
20235	6	3197	0
37383	2	12417	1
36940	2	34035	0
37383	2	33492	1
12034	10	36717	0
37383	2	6496	1
9313	0	14245	0
36789	0	21858	1
37724	2	14499	0
36672	0	36497	1
6992	8	38137	0
37199	4	33177	1
13875	7	21739	0
37284	0	21858	1
15802	7	37365	0
37284	6	2338	1
7693	2	15980	0
37284	6	1572	1
31798	5	1094	0
36487	6	4134	1
19676	7	13485	0
36487	6	23862	1
12986	3	19093	0
36487	6	12437	1
8900	5	4095	0
36490	0	2293	1
15025	9	34590	0
36642	2	31835	1
23881	3	27912	0
36642	2	12698	1
27664	10	2104	0
36642	2	7713	1
4973	0	37482	0
37710	2	23707	1
33248	3	36218	0
37649	2	1408	1
36879	9	34928	0
37716	2	32210	1
5191	1	8623	0
37028	6	36862	1
5520	7	13153	0
37267	3	20389	1
28370	8	37589	0
36824	0	26857	1
35951	1	21613	0
37473	5	20325	1
33054	5	10747	0
36589	8	16346	1
6007	10	25436	0
37291	3	25051	1
3063	3	20695	0
38104	2	33517	1
37066	3	13875	0
37356	1	34276	1
37273	3	12443	0
37831	4	29789	1
37797	8	16856	0
37831	2	17546	1
5244	2	12725	0
37831	2	17077	1
11742	2	422	0
37831	5	8492	1
29760	7	37912	0
37831	5	23346	1
9037	2	2964	0
36841	3	6986	1
6787	7	37106	0
36454	6	26412	1
2883	9	37273	0
37248	6	14442	1
37886	10	10134	0
37608	0	31363	1
23843	0	11742	0
37608	2	24337	1
6101	4	5324	0
36512	3	38011	1
14611	5	19707	0
36718	0	8666	1
5520	10	13434	0
37854	4	14826	1
161	4	11925	0
37407	0	31462	1
844	8	37411	0
37454	0	9258	1
26864	4	24556	0
36725	0	30255	1
5576	0	13676	0
36480	1	28032	1
19081	6	30197	0
37464	0	13800	1
37596	9	37038	0
37874	8	37467	1
7922	8	27664	0
38040	2	16310	1
15514	8	17760	0
37855	0	19436	1
422	1	33027	0
36927	0	19527	1
34730	4	11824	0
36927	6	33317	1
36942	9	7016	0
36927	6	9914	1
16373	0	10516	0
37261	6	36512	1
2069	9	38118	0
37296	0	26005	1
14437	5	25185	0
37942	2	21013	1
36552	8	36864	0
37826	2	37826	1
37742	7	24438	0
36488	0	38153	1
16373	2	35514	0
37476	0	15004	1
5324	0	24829	0
37586	4	6983	1
34730	10	31381	0
36958	6	7661	1
37197	6	25432	0
36958	6	31351	1
1549	8	20978	0
36640	0	9603	1
25572	4	28045	0
38114	2	27613	1
13153	0	22370	0
37014	2	16709	1
15689	8	29226	0
37448	0	24660	1
21824	7	9604	0
37448	2	11605	1
34035	9	4025	0
37286	6	20731	1
28273	8	23566	0
36533	2	12549	1
18650	6	9562	0
36533	2	36780	1
11863	0	18311	0
36533	2	35853	1
16793	6	4123	0
36533	2	29649	1
26486	2	13190	0
36533	5	18564	1
8296	4	6920	0
36533	2	16852	1
34897	6	14554	0
36775	0	19759	1
29426	10	36552	0
37761	2	10467	1
23386	2	34590	0
37761	2	1942	1
4300	6	17844	0
37069	0	14810	1
30144	8	3877	0
37680	6	28437	1
25596	3	24438	0
37680	6	26317	1
12775	9	33027	0
37680	6	21817	1
6169	5	36477	0
37680	6	34667	1
6141	10	31910	0
37282	5	12083	1
3450	3	14245	0
36483	6	12661	1
6980	0	27664	0
37546	4	7918	1
26568	1	38118	0
36853	0	19720	1
12439	1	14245	0
36785	3	31130	1
7438	7	30825	0
36637	4	1404	1
4123	9	36988	0
37353	0	9612	1
16424	10	35972	0
37497	0	19088	1
1620	0	12437	0
37083	2	19321	1
35640	9	36422	0
37083	2	29085	1
21662	8	4300	0
37083	2	7377	1
13874	10	37528	0
37083	2	36828	1
36942	0	23210	0
37083	2	33120	1
1897	0	31760	0
37083	2	37711	1
15022	8	19347	0
37083	2	36604	1
19918	7	4300	0
37083	2	3590	1
27912	8	31760	0
37083	2	35764	1
27897	3	19093	0
37083	2	10551	1
37532	7	8454	0
37952	0	15223	1
18567	10	17320	0
36729	2	1487	1
21083	7	12561	0
37768	3	16206	1
34897	6	36218	0
36835	9	3283	1
23035	5	6101	0
36835	9	16521	1
4966	3	23843	0
37797	5	2682	1
11648	1	31910	0
36778	2	24444	1
14437	4	9129	0
36781	2	1748	1
36879	9	5444	0
36781	2	19085	1
25572	10	6122	0
36781	2	38006	1
18053	5	9840	0
37023	0	24574	1
15689	9	36869	0
37453	8	36636	1
10887	2	3306	0
36992	3	1501	1
34035	1	4973	0
37593	0	19527	1
19347	4	21599	0
36446	2	15149	1
22914	4	15802	0
36611	2	14715	1
24325	5	29579	0
37260	2	10361	1
25431	4	12561	0
36700	3	23728	1
8033	8	2625	0
36686	6	19073	1
25257	0	29198	0
37434	2	31751	1
38118	4	16856	0
37434	2	2411	1
1711	4	37814	0
38085	0	32555	1
5851	1	19358	0
36825	2	5616	1
34035	7	31910	0
36825	2	28871	1
19161	5	26764	0
37019	8	32652	1
1094	9	10578	0
37019	5	4979	1
2947	5	16563	0
38072	0	23807	1
29595	10	2725	0
36574	0	10011	1
1973	7	9755	0
36574	3	37935	1
35972	10	17760	0
36597	6	12370	1
7987	3	25921	0
36597	6	26336	1
24087	0	15689	0
37576	0	2060	1
13263	3	24325	0
37576	3	30610	1
27610	8	10773	0
37004	2	10041	1
4891	2	26281	0
36989	4	36617	1
12564	7	33027	0
36989	5	36982	1
37528	0	29226	0
36989	5	36938	1
36864	2	23843	0
38015	4	16534	1
16794	1	26486	0
36791	5	574	1
21789	6	21544	0
37549	4	32349	1
2947	4	25921	0
37549	5	14330	1
19531	9	13190	0
36546	5	37199	1
17320	7	5404	0
37122	2	28506	1
29198	9	36861	0
36852	2	33650	1
18306	9	33248	0
37438	2	28903	1
6716	4	37875	0
37587	0	36660	1
30387	9	27802	0
36671	0	37216	1
9635	4	14611	0
36977	3	37261	1
37866	10	21789	0
36977	10	27084	1
9562	6	13390	0
36977	5	26202	1
29588	9	28568	0
37057	0	36577	1
16728	1	21662	0
38137	0	14810	1
35972	9	30306	0
36737	4	16515	1
4095	8	31776	0
38039	4	5702	1
32331	1	10516	0
37397	0	22429	1
8454	10	34369	0
37312	5	15207	1
37916	7	13948	0
37835	3	3641	1
3339	10	5314	0
37040	5	1716	1
25596	6	13802	0
36899	3	37706	1
37475	3	5867	0
37840	2	5601	1
19358	7	28221	0
37229	8	13853	1
26526	5	7816	0
37515	2	25199	1
4891	0	37379	0
37052	0	14639	1
21662	6	32876	0
37357	0	23693	1
19707	0	34590	0
37394	3	6493	1
19676	9	6545	0
37285	0	23621	1
36445	9	2104	0
38056	3	37817	1
37742	10	26534	0
37077	0	24684	1
24829	8	2019	0
37725	0	24045	1
14647	2	27173	0
37779	4	21016	1
5867	10	37770	0
37779	5	6870	1
15476	2	15712	0
36828	6	20076	1
36988	7	30070	0
37731	1	16794	1
16563	9	3810	0
37399	0	22010	1
31239	2	24438	0
37399	5	19861	1
6716	4	19052	0
36520	0	16379	1
31977	10	37273	0
37770	0	24877	1
36869	1	17690	0
36712	0	37992	1
37050	3	12724	0
37465	0	37433	1
12377	2	2883	0
36942	3	37489	1
2556	2	31989	0
37955	2	17774	1
25225	5	3877	0
36524	8	38043	1
32876	0	22148	0
36524	5	37349	1
2019	5	38118	0
38091	2	17742	1
27802	0	6716	0
38091	2	10734	1
10920	1	25257	0
36485	2	19270	1
15025	1	38089	0
36485	2	12548	1
36632	10	25572	0
37737	0	33950	1
19407	7	36988	0
36705	3	2278	1
29198	10	1344	0
37842	2	17584	1
31606	4	3877	0
36604	3	7847	1
36118	10	2019	0
38016	1	20653	1
28956	4	15986	0
37446	2	9781	1
32876	9	30507	0
37446	2	7928	1
7576	6	37916	0
37852	0	10011	1
31798	7	23566	0
37331	3	37775	1
31283	0	10813	0
37331	6	36452	1
36879	2	38149	0
37331	6	31005	1
16794	9	30648	0
37331	6	16838	1
21662	7	6716	0
37457	0	4595	1
34369	10	24815	0
37653	0	8832	1
1512	6	11756	0
37339	0	9798	1
31776	3	2019	0
38096	2	15132	1
6980	8	11392	0
37123	0	19527	1
37273	10	13390	0
37821	3	37197	1
5660	10	887	0
36738	3	24708	1
346	7	36702	0
36436	5	822	1
8966	9	31856	0
36436	5	9243	1
11487	2	23441	0
36910	0	2060	1
12158	5	32872	0
36507	2	33677	1
14647	3	7576	0
37299	2	22064	1
346	1	21738	0
37506	8	20695	1
21599	9	11742	0
37506	5	35081	1
37916	0	14647	0
37506	5	30481	1
22914	8	4609	0
37850	2	34198	1
3349	2	6992	0
37439	5	22268	1
15689	6	15075	0
37439	5	35784	1
37866	7	12775	0
37697	0	28440	1
15650	10	10887	0
36567	2	15695	1
30648	4	15870	0
37810	3	2928	1
36422	2	30197	0
37886	5	4977	1
6141	5	6716	0
38147	3	23547	1
7211	9	25578	0
37523	6	22072	1
23386	0	36920	0
36566	0	27507	1
25921	5	4891	0
36439	3	22422	1
16196	3	14499	0
36439	6	19880	1
25247	5	30294	0
37358	0	13401	1
3385	0	35514	0
36522	3	24596	1
36454	10	29588	0
36522	6	27945	1
3897	6	13802	0
36522	6	2152	1
15025	3	37725	0
37509	6	37351	1
31380	1	2388	0
37509	6	34995	1
8281	6	4891	0
37423	0	36507	1
33246	8	8458	0
37631	3	2332	1
8454	7	25225	0
36677	2	37850	1
4025	1	6101	0
38071	2	24748	1
13591	0	23339	0
38071	2	36274	1
22047	4	3339	0
36693	6	19584	1
31692	10	6509	0
36693	6	15210	1
15870	4	31130	0
37367	0	21733	1
14747	2	36218	0
37367	2	18044	1
26568	3	37439	0
37367	2	13064	1
31144	5	6007	0
36459	3	36493	1
12377	6	298	0
37753	2	12354	1
19676	1	30825	0
37460	2	36632	1
27802	8	4447	0
36497	2	37763	1
10813	10	24556	0
38118	2	6846	1
2883	2	21429	0
36664	2	32703	1
30306	3	5660	0
37908	0	5664	1
33027	2	44	0
37402	6	36056	1
12999	1	37379	0
37223	3	4313	1
29595	5	161	0
37195	0	37083	1
19640	6	3440	0
37382	3	605	1
8193	5	2725	0
37665	6	28346	1
17320	9	35951	0
36476	4	36826	1
36454	3	22047	0
36889	4	22206	1
25060	0	37531	0
36809	2	15412	1
19081	7	27497	0
36809	2	13115	1
24747	9	36864	0
36743	5	32485	1
21083	9	10910	0
36444	2	11719	1
9755	3	386	0
37410	0	26488	1
25060	6	15514	0
37548	3	37563	1
2807	5	37038	0
36644	2	16221	1
15476	6	29341	0
36644	2	37444	1
11065	7	37050	0
36644	2	13750	1
24325	8	8033	0
37058	0	896	1
7987	0	38145	0
36707	0	732	1
37475	8	30507	0
36900	2	3852	1
37038	0	12437	0
37421	3	37388	1
8033	3	12870	0
37788	0	1474	1
22799	2	21195	0
37466	5	35237	1
24796	8	3897	0
37466	5	14136	1
7438	6	22050	0
37466	10	4360	1
29044	2	36454	0
38007	3	26596	1
16424	8	18074	0
37055	0	24789	1
8900	8	16902	0
37305	0	14639	1
9755	0	27457	0
36532	0	8462	1
23436	4	1094	0
37664	0	19754	1
844	10	17256	0
37913	4	22131	1
3385	0	22370	0
36864	0	37407	1
14499	10	13675	0
37440	0	24854	1
18053	1	5244	0
37440	5	20648	1
7299	8	23566	0
37498	0	13647	1
8545	8	26486	0
37498	0	36254	1
8623	8	28568	0
38019	6	26709	1
17256	4	21429	0
37750	6	35059	1
28273	4	12986	0
38048	2	10773	1
33637	8	4811	0
37999	2	36497	1
37475	8	21160	0
37999	2	23508	1
8623	0	35951	0
37999	2	19004	1
36608	9	36608	0
37705	2	23076	1
7438	1	36864	0
37688	0	5293	1
24438	10	37786	0
37688	2	33765	1
8041	9	17082	0
37688	2	32159	1
36454	1	38145	0
37688	2	26545	1
31480	2	23035	0
37688	2	25965	1
21662	0	21376	0
37688	2	35977	1
19407	1	25436	0
37349	5	18363	1
12999	3	9794	0
37349	5	19446	1
2524	10	4447	0
37349	5	32192	1
34117	7	37555	0
37349	5	26238	1
31463	2	9486	0
37268	0	10574	1
18266	8	31283	0
37222	2	17016	1
15802	8	31798	0
37222	2	36420	1
4372	1	36477	0
37411	6	5690	1
6992	1	37677	0
36646	3	23728	1
37478	0	37677	0
36435	5	20508	1
10463	1	36940	0
37414	1	15712	1
15986	1	19232	0
37573	3	7730	1
14609	4	29044	0
36618	0	15335	1
21613	4	36516	0
37202	0	38036	1
9107	6	15832	0
36433	0	23113	1
29044	1	7299	0
36433	9	15707	1
13162	0	18074	0
36433	9	14965	1
12725	4	36702	0
37275	0	24897	1
14298	9	37379	0
38045	5	18544	1
8966	2	19347	0
38045	5	37021	1
22799	3	36422	0
38045	5	8705	1
36940	8	30387	0
36861	2	10782	1
17844	1	31130	0
36861	2	16287	1
20800	3	8314	0
37916	0	17220	1
25257	0	27840	0
37712	6	17869	1
24530	9	21429	0
36649	2	17915	1
15438	10	2947	0
36716	5	22200	1
31760	3	37050	0
37773	2	15032	1
23693	7	18306	0
37210	4	18196	1
15802	1	12986	0
36826	5	2883	1
37050	3	38137	0
36826	5	34705	1
30387	9	36940	0
36826	10	19007	1
31113	7	37530	0
36928	0	36903	1
5867	7	36527	0
37494	0	10626	1
17760	8	38065	0
36917	0	21376	1
32876	5	37781	0
36917	2	21988	1
23632	9	2807	0
36995	0	26132	1
21083	2	9604	0
36950	0	7858	1
22050	9	36608	0
37297	0	27656	1
31582	6	27912	0
37707	3	23728	1
10516	6	36842	0
36587	5	27014	1
3810	6	19117	0
37504	6	10555	1
32186	1	18650	0
38051	0	38017	1
30825	4	16450	0
38051	2	2983	1
15252	8	20695	0
37658	3	754	1
13875	10	37410	0
38103	0	28418	1
3440	4	7168	0
38103	2	2072	1
6101	1	3987	0
37352	0	27546	1
36516	2	37692	0
37510	3	36506	1
30144	9	36855	0
36726	1	36648	1
1711	8	10773	0
38105	0	35344	1
13948	5	11648	0
38105	2	32356	1
21738	5	5576	0
37193	3	38149	1
22481	0	3877	0
37677	3	34466	1
13162	7	9061	0
36537	0	2371	1
13591	0	5093	0
37012	8	38135	1
14298	2	17320	0
36489	0	36024	1
25742	3	34035	0
36832	0	13830	1
32331	0	14973	0
36832	3	7730	1
5576	3	37528	0
37723	0	23731	1
3820	3	33027	0
37723	4	22777	1
9107	3	10134	0
36550	0	36531	1
15689	6	33334	0
36761	2	15969	1
37050	10	18650	0
37239	2	24197	1
7554	6	14647	0
37239	5	30000	1
37724	1	37724	0
37636	0	14228	1
22047	4	2472	0
37279	1	23431	1
19081	6	29122	0
37800	4	9976	1
2069	8	36855	0
37847	0	22328	1
3897	3	31130	0
38107	0	37417	1
38118	5	18650	0
37217	2	4182	1
9252	2	28525	0
37976	0	8808	1
14647	0	2625	0
36923	4	25820	1
24530	10	8033	0
37959	0	791	1
14154	6	17082	0
36561	0	12847	1
36972	8	15802	0
37553	2	30011	1
28956	5	28370	0
36833	0	35231	1
13190	8	37770	0
37857	0	6454	1
37475	7	37532	0
37078	0	5329	1
19052	2	14685	0
37078	3	11893	1
13153	2	36608	0
37143	0	3636	1
15689	6	8623	0
37595	1	13127	1
21160	4	34083	0
37080	0	36497	1
38128	4	35921	0
36876	0	18521	1
10532	1	5404	0
37302	5	16105	1
24556	1	3897	0
37157	1	7205	1
1344	9	33027	0
37108	0	7214	1
12443	9	33624	0
37396	6	21392	1
36586	10	34369	0
36526	2	8265	1
14588	9	4656	0
36526	2	1087	1
2019	1	37406	0
37362	0	10484	1
16196	2	22799	0
38022	0	24834	1
18266	8	30648	0
36549	6	15215	1
38065	7	31380	0
38029	2	35252	1
1026	3	7168	0
37132	0	37347	1
37692	6	36702	0
37132	1	16794	1
37601	9	12986	0
36568	0	12760	1
35951	5	29226	0
37224	4	36552	1
32058	1	4000	0
37948	0	4251	1
18266	8	8296	0
37948	6	32706	1
36972	2	346	0
36871	0	15826	1
22370	9	36864	0
36479	3	34007	1
38145	5	37692	0
38077	3	36929	1
15712	8	20695	0
38077	6	36493	1
23035	5	24325	0
38144	2	18398	1
1344	9	15022	0
38144	9	7584	1
15689	9	24556	0
38144	9	8265	1
32905	0	7576	0
38144	9	8635	1
24815	7	2069	0
36667	2	14986	1
6980	7	36983	0
36667	2	26724	1
37749	7	16471	0
38011	6	37428	1
12439	0	3450	0
38011	6	25693	1
7978	0	38118	0
36808	0	30635	1
23257	1	34928	0
37846	2	8320	1
11487	3	30507	0
37034	2	5749	1
105	5	7299	0
36838	0	21578	1
16747	9	33248	0
36838	2	27803	1
27664	2	13162	0
36810	0	12847	1
5314	4	5314	0
37967	4	36780	1
2883	0	15472	0
37536	0	37168	1
22370	8	26750	0
36652	2	28443	1
11756	10	29141	0
37088	1	23431	1
18266	0	13948	0
37220	8	25879	1
18680	4	4382	0
37360	0	36749	1
24574	3	33624	0
36603	0	16897	1
4186	3	1620	0
37134	5	32870	1
24398	10	4025	0
37134	5	13926	1
34035	0	13190	0
37134	5	10858	1
25257	2	12775	0
36692	0	27726	1
28221	7	16659	0
36692	3	27880	1
29152	3	36552	0
37093	2	36305	1
4609	5	15802	0
37769	8	32652	1
4966	0	422	0
37769	4	36826	1
6716	5	12439	0
37447	0	19720	1
37596	6	36942	0
37447	2	28216	1
37406	10	35640	0
37447	2	34865	1
37502	5	31716	0
36591	4	33064	1
17760	3	2388	0
36998	4	16267	1
32905	4	22196	0
36998	9	36074	1
13215	10	17017	0
38109	2	28566	1
6980	1	29141	0
38116	5	3190	1
3450	2	5495	0
38116	5	9057	1
13485	3	16022	0
36768	0	14611	1
38089	4	12724	0
37000	1	16794	1
5867	1	15169	0
37765	2	32448	1
2625	1	24815	0
37734	2	5800	1
18195	7	13874	0
37526	3	37706	1
37911	2	37814	0
37485	0	37035	1
37873	3	6101	0
38017	2	38051	1
10578	4	27897	0
38006	2	19550	1
19426	8	12439	0
38006	2	32820	1
37912	6	37365	0
36624	6	32674	1
12158	6	5851	0
37589	0	18922	1
34543	0	33637	0
37377	3	37848	1
20800	8	34035	0
37844	8	25354	1
5093	7	21376	0
37659	4	7083	1
15368	8	10313	0
37905	0	15443	1
15438	7	38145	0
37158	8	21977	1
5191	10	38040	0
38132	2	13926	1
21824	4	37912	0
38133	9	18121	1
17625	0	37866	0
36585	6	8127	1
20695	3	32872	0
36658	3	11609	1
12999	7	27640	0
37792	0	3554	1
3306	0	16747	0
36758	6	29963	1
6141	7	31239	0
36770	2	33044	1
37406	0	37478	0
36786	3	36869	1
24249	3	7978	0
36534	0	32555	1
37896	9	23843	0
36990	3	26928	1
7438	0	32331	0
36975	0	37936	1
3254	6	5851	0
36498	2	25230	1
7922	8	2104	0
38098	0	17292	1
12861	0	1026	0
36441	0	35770	1
12437	5	37530	0
37068	4	33818	1
37724	10	3349	0
37068	5	36994	1
36879	0	5699	0
37068	5	5670	1
27255	5	21376	0
37068	5	36523	1
23843	2	25436	0
37066	1	10068	1
37513	2	15514	0
38153	0	20685	1
3197	4	36940	0
36698	0	19527	1
13190	6	13779	0
37115	3	10863	1
5699	9	10058	0
37620	1	1590	1
20135	3	29426	0
37729	2	36518	1
37742	4	27610	0
36494	0	10309	1
22799	6	37406	0
37163	0	13830	1
37038	0	36942	0
36812	0	37083	1
6141	0	9313	0
37442	9	11718	1
6492	4	14496	0
37442	9	615	1
7576	4	30387	0
37698	3	6021	1
5495	6	14437	0
36819	5	7708	1
161	10	1297	0
37467	0	14874	1
21160	4	10058	0
37914	0	36024	1
29044	4	37692	0
36491	0	8588	1
288	1	30648	0
37639	0	9557	1
298	0	24815	0
37639	6	30608	1
16856	10	10933	0
37639	6	16023	1
27840	0	33719	0
36581	3	31537	1
887	5	15476	0
36606	3	23214	1
23566	6	3810	0
37657	6	27726	1
21376	9	19232	0
37657	6	37848	1
33624	10	1693	0
36932	0	18455	1
31380	6	14496	0
36805	0	37802	1
27032	2	36471	0
36727	4	30693	1
37197	9	37513	0
37633	5	32915	1
15689	6	21083	0
36499	5	4748	1
14298	9	28568	0
38123	0	11068	1
36852	6	15980	0
37221	2	29605	1
4966	5	21544	0
36601	6	26924	1
5124	10	13676	0
37841	6	35326	1
18266	10	28525	0
37979	6	37543	1
31716	5	10910	0
37794	5	36717	1
422	10	31856	0
37391	0	23149	1
28370	9	31989	0
37036	0	30150	1
15980	6	31760	0
37818	0	9615	1
19326	2	6169	0
36831	0	1484	1
11392	2	27800	0
37298	4	14467	1
3440	9	21083	0
37298	4	31988	1
12858	10	34035	0
37610	0	14810	1
26864	7	30648	0
37610	3	29805	1
10463	4	2556	0
36668	6	26852	1
14154	7	12986	0
37044	6	37036	1
31381	3	3349	0
37375	0	36763	1
38089	2	16673	0
37225	0	21774	1
2725	1	7999	0
37225	2	23154	1
23035	0	21509	0
36622	0	37994	1
14342	3	18009	0
36622	2	17612	1
16022	2	26526	0
37623	2	12004	1
25247	8	21681	0
36784	2	27190	1
32876	2	28956	0
37514	0	21858	1
23436	10	16563	0
37209	0	16611	1
5324	4	6101	0
37807	0	19041	1
501	10	17017	0
37441	3	29805	1
27032	3	18567	0
37320	3	21949	1
34035	0	36852	0
37320	2	27714	1
14973	2	29426	0
37320	2	19776	1
9794	2	36869	0
37320	2	32933	1
6440	2	6980	0
37320	2	3790	1
5660	5	37106	0
37320	2	33906	1
343	0	36516	0
37373	0	19527	1
844	10	17256	0
37373	6	25892	1
26750	0	36477	0
37580	2	35180	1
2019	9	19722	0
37484	3	30512	1
6980	7	6440	0
37484	6	721	1
22389	0	23257	0
37484	6	19156	1
16022	1	13485	0
37484	6	14138	1
3347	4	19722	0
37484	6	20474	1
36702	6	105	0
37829	0	19542	1
23881	9	18680	0
37016	0	21235	1
36552	9	25360	0
38033	2	8872	1
10134	8	37724	0
37262	5	23911	1
19358	1	6440	0
36983	8	19794	1
9037	5	29595	0
37572	4	37572	1
15689	6	27897	0
36750	0	37704	1
22196	7	501	0
36750	4	1202	1
6545	0	3385	0
36493	3	38077	1
4746	4	19052	0
36501	2	37773	1
18074	6	887	0
38156	3	3787	1
37873	2	14499	0
37660	3	28746	1
36477	5	30825	0
38002	2	36275	1
4656	8	12724	0
37726	3	13142	1
19640	8	37066	0
38080	3	28421	1
3347	1	11782	0
38080	5	38080	1
10933	1	24325	0
36971	1	16794	1
37692	0	15689	0
37086	0	13282	1
27912	8	4973	0
38120	3	18100	1
7999	10	16450	0
38120	2	26669	1
32872	5	31113	0
38113	2	15795	1
33462	8	9486	0
37795	6	8230	1
37050	4	11824	0
37772	3	14179	1
26750	4	19326	0
36925	3	20791	1
20800	5	14002	0
36925	6	32953	1
9313	6	14685	0
37893	2	5107	1
8119	3	2465	0
37893	2	2655	1
19093	0	5191	0
36615	2	10856	1
4891	7	15802	0
36615	2	15099	1
8314	1	36852	0
38148	2	19518	1
14554	4	33317	0
38148	2	33803	1
15252	6	37596	0
36513	0	36774	1
24398	7	14002	0
37926	2	16639	1
14609	3	38040	0
37926	2	5492	1
2556	10	4447	0
37038	4	30581	1
35640	5	19081	0
37341	4	37132	1
11742	9	19676	0
37067	3	29884	1
26534	0	3450	0
36607	2	30911	1
9313	5	25596	0
36746	3	1909	1
6545	6	7999	0
37428	5	21487	1
26534	9	15986	0
37798	6	35388	1
37066	6	27800	0
37849	8	2647	1
15476	7	35459	0
37849	5	10566	1
13948	0	5495	0
37749	0	17140	1
37197	5	1620	0
37749	1	15712	1
31776	7	6122	0
37920	3	10677	1
25247	7	16022	0
36842	2	28253	1
14499	8	12858	0
37583	2	30383	1
24829	2	33248	0
37547	0	2509	1
28176	5	15252	0
36470	0	21245	1
2229	9	5410	0
36634	0	11068	1
22047	9	27897	0
38046	0	31462	1
18053	3	9794	0
38046	2	18409	1
34590	9	22481	0
37906	0	32677	1
14747	8	37406	0
37507	3	37706	1
16022	1	36988	0
38111	0	30693	1
38040	0	8623	0
36793	0	36498	1
8034	1	422	0
37550	0	29491	1
36983	2	1620	0
37395	2	29233	1
24325	2	33624	0
37403	2	37627	1
844	3	14611	0
38154	3	14149	1
14437	1	13591	0
37640	3	20397	1
887	7	30306	0
36579	2	35580	1
25413	10	15121	0
36636	2	1979	1
28956	6	2524	0
36636	2	247	1
8041	3	12725	0
36636	2	33778	1
27457	3	9562	0
36636	2	37701	1
14973	4	19676	0
36636	2	21500	1
31856	6	2725	0
36636	2	8482	1
12443	3	38089	0
36636	2	2998	1
37770	3	37439	0
36636	2	34523	1
19531	7	16673	0
36636	2	5415	1
3306	8	21195	0
37405	1	37621	1
13190	10	36717	0
38062	0	30698	1
25185	7	10463	0
37184	5	8935	1
36608	9	8034	0
37525	0	36024	1
31551	9	7922	0
37897	0	2392	1
11756	9	1512	0
36655	5	25470	1
33317	7	20800	0
38092	0	32555	1
1344	8	11742	0
38092	3	23728	1
22050	10	1344	0
37333	3	37372	1
22389	3	3770	0
37333	2	20171	1
31560	0	14609	0
36799	3	4248	1
27800	9	31301	0
38000	2	1057	1
27817	8	18680	0
37931	4	31359	1
16902	3	30833	0
36879	0	28844	1
9129	1	19232	0
36715	2	37774	1
7576	7	10773	0
36697	0	37734	1
11742	8	21681	0
37882	4	2852	1
2465	0	23339	0
37882	2	35695	1
22799	1	3877	0
37501	8	37383	1
33637	4	25360	0
37274	5	1467	1
10747	9	16118	0
37274	5	14628	1
18270	7	3820	0
37554	4	5419	1
7999	3	3385	0
37324	0	37335	1
10134	8	9107	0
38030	3	11609	1
31856	0	32331	0
38030	6	7121	1
24398	5	22799	0
36471	0	27242	1
28956	10	14245	0
36471	2	17980	1
33719	10	2725	0
36471	2	37236	1
32872	4	17797	0
37746	6	27984	1
14496	0	35972	0
37746	6	28250	1
15514	1	36942	0
37746	6	11720	1
34035	1	14647	0
37925	0	36325	1
37724	5	3306	0
37470	3	5074	1
30197	2	24829	0
37470	2	9324	1
27497	9	7211	0
36663	4	263	1
5851	3	31480	0
36753	6	31296	1
3349	0	3347	0
37727	2	20940	1
10313	3	31551	0
37727	2	16166	1
15802	6	29226	0
37752	2	3746	1
23035	6	18009	0
37273	3	37435	1
10813	9	14437	0
37273	6	17110	1
37513	0	16659	0
36862	0	24877	1
4000	5	4319	0
36862	3	37028	1
10516	6	36842	0
37561	0	35756	1
25185	6	17844	0
37056	8	36131	1
2947	3	36516	0
37056	8	9093	1
19545	8	16728	0
36806	0	27068	1
14604	1	17844	0
36806	2	20338	1
31977	2	10058	0
37126	3	31912	1
24438	9	19918	0
36648	9	5106	1
5520	9	2964	0
36648	9	5337	1
12443	6	24325	0
36648	9	4998	1
22370	3	8966	0
36648	9	9710	1
14588	3	9562	0
36648	9	7589	1
343	3	29044	0
36648	9	18576	1
3385	5	30825	0
36648	9	29747	1
18776	8	36861	0
36648	9	7804	1
29755	10	38089	0
36648	9	7316	1
31113	5	3440	0
36648	9	14445	1
19232	1	8545	0
36648	9	21511	1
31480	5	8454	0
36648	9	29711	1
21509	7	36920	0
36648	9	503	1
31776	3	7693	0
36648	9	23812	1
5191	7	346	0
36648	9	29237	1
15025	8	25413	0
36648	9	38027	1
18074	8	28221	0
36648	9	36472	1
10463	4	31130	0
36648	9	4558	1
13591	9	13948	0
36648	9	8233	1
3440	6	31480	0
36648	9	22755	1
8281	8	3810	0
36648	9	36726	1
37725	0	37847	0
36648	9	12418	1
31144	5	36552	0
36648	9	24148	1
6492	3	10910	0
36648	9	26493	1
2388	1	25431	0
36648	9	811	1
31910	5	24578	0
36648	9	17232	1
34083	0	844	0
36648	9	4239	1
30387	7	30648	0
36648	9	10008	1
37886	5	14499	0
37317	0	3113	1
19117	9	16563	0
37251	5	21966	1
18680	8	4973	0
37251	5	3395	1
34974	8	35921	0
37752	2	32698	1
3820	0	7999	0
38082	0	10734	1
11925	9	19676	0
36874	0	22118	1
8033	5	9635	0
36874	4	35725	1
29755	3	14611	0
37834	0	25507	1
19232	0	36940	0
36756	0	31241	1
37066	4	27800	0
36660	2	37587	1
31480	6	29121	0
37592	0	12901	1
30144	6	36586	0
38004	3	6705	1
12564	0	8193	0
36800	6	11398	1
31480	8	37725	0
36432	0	36205	1
3820	2	25436	0
36744	0	38107	1
4891	7	13874	0
37070	4	24009	1
21544	0	11742	0
37070	2	36940	1
17690	5	15438	0
37596	8	38048	1
4186	7	18074	0
37596	4	15236	1
20978	4	4746	0
37885	0	9603	1
25225	1	844	0
37885	6	36597	1
17844	3	37589	0
36926	0	17722	1
36471	9	23436	0
38122	0	24740	1
37050	8	7978	0
36736	2	30920	1
9107	1	13675	0
36505	0	32478	1
15832	0	4382	0
36505	3	37388	1
29152	9	12775	0
37560	2	14713	1
887	8	28221	0
37560	2	11977	1
33317	3	37797	0
37529	2	37590	1
37781	0	21376	0
37529	2	30958	1
2104	4	1512	0
37443	1	35124	1
7576	2	15689	0
37045	3	36487	1
5851	1	35972	0
37045	6	1188	1
12858	4	13675	0
38068	0	11340	1
8193	8	25436	0
38068	3	29025	1
13779	2	19232	0
38081	0	13853	1
4656	5	18650	0
38081	5	37530	1
24398	9	37886	0
37029	0	31112	1
15986	1	28956	0
37029	3	37024	1
14973	3	8768	0
37743	4	3672	1
31582	10	36422	0
37896	0	19527	1
20695	3	31301	0
37896	6	4354	1
20978	7	12439	0
36868	0	5614	1
36972	3	36454	0
36563	5	38009	1
16728	8	31283	0
36517	4	27950	1
38065	4	8480	0
37870	0	29157	1
23035	9	3877	0
[truncated: 2,862 more rows]
