# Supplementary material
Source: ML conference proceedings conference paper supplement (https://proceedings.neurips.cc/paper_files/paper/2021/hash/0fd600c953cde8121262e322ef09f70e-Abstract.html)
Supplement: Supplementary file 1 [file 0fd600c953cde8121262e322ef09f70e-Supplemental.zip › Supplementary_Material_Paper_8745/data/Hamaguchi-BM_head-5000/test/test-random-sample/test6.txt]

38038	0	13590	1
14499	1	22799	0
37961	2	21629	1
13779	2	12439	0
37786	2	21674	1
1512	7	27664	0
37125	0	9144	1
23035	3	4656	0
37706	6	33781	1
6007	6	1861	0
37706	6	4066	1
4746	8	26864	0
37706	2	2163	1
14002	3	21195	0
37706	6	34609	1
17320	7	10532	0
37706	6	16086	1
25516	10	21564	0
37706	6	3596	1
34897	6	16196	0
37706	6	33602	1
27897	1	36972	0
37706	6	30633	1
6492	1	18074	0
37706	6	31350	1
37781	7	31239	0
37732	8	21977	1
4973	3	15980	0
36920	0	18455	1
13802	2	17844	0
36920	6	30072	1
13485	7	13485	0
37431	0	21858	1
23035	0	20800	0
37431	3	5512	1
844	9	12377	0
36503	9	19295	1
19676	6	21544	0
36452	6	23095	1
27897	9	4319	0
37256	6	32897	1
32331	1	17625	0
37175	0	1494	1
37050	4	5699	0
37995	0	38058	1
12986	9	12986	0
37995	2	19334	1
27470	10	26526	0
36617	5	36348	1
13043	5	2096	0
36617	5	37969	1
19676	1	4811	0
36617	5	3479	1
36920	10	7978	0
36617	5	37281	1
6992	0	25578	0
37683	4	8226	1
7576	1	7576	0
37740	1	27492	1
10134	4	30197	0
36559	4	3873	1
37273	0	37847	0
37452	3	37746	1
6101	4	31776	0
37490	0	38106	1
4447	8	17017	0
36883	2	5309	1
14604	10	31910	0
36760	2	28698	1
21681	3	23843	0
36760	2	15844	1
2388	5	5410	0
37527	1	38144	1
3778	4	18414	0
37408	0	22280	1
37873	7	36422	0
37408	2	19626	1
7554	0	2883	0
37408	2	23911	1
8336	10	34481	0
37718	0	11318	1
6122	1	27497	0
37487	5	10055	1
25484	8	13591	0
37412	4	34985	1
4186	0	2807	0
37820	1	2195	1
7816	9	5520	0
36614	3	13925	1
1711	1	13874	0
38095	9	20539	1
18266	7	15870	0
38095	9	20083	1
30306	10	7922	0
37676	0	12847	1
15961	5	26511	0
36552	5	7602	1
19093	9	8281	0
36552	5	6623	1
343	2	16563	0
37351	0	23693	1
30144	6	22148	0
37351	3	37509	1
36842	0	34846	0
37351	6	20995	1
35093	10	12996	0
36795	1	6886	1
33248	10	10887	0
36690	0	36504	1
3897	1	19232	0
38078	6	4844	1
25484	7	23339	0
36495	2	10254	1
25300	4	3197	0
36495	2	37611	1
8033	8	7978	0
36495	2	38140	1
6122	2	26844	0
36495	2	12686	1
7978	2	37725	0
36495	2	4171	1
16728	0	21662	0
36495	2	30916	1
15980	8	25742	0
36495	2	11884	1
35492	6	34481	0
37996	0	32555	1
31301	9	33246	0
37663	1	26796	1
8900	4	6992	0
37475	2	20536	1
2625	9	14588	0
36632	2	27167	1
21738	7	19117	0
37144	3	1033	1
25882	7	21426	0
37099	6	13451	1
27664	0	11129	0
37099	6	37402	1
21613	10	15438	0
37099	6	7680	1
15832	10	37724	0
37099	6	7730	1
21544	3	10920	0
37099	6	26613	1
21509	2	25413	0
37868	0	11719	1
31904	6	9794	0
37278	0	26360	1
37692	0	10773	0
36966	2	36580	1
8193	2	31856	0
37899	3	4039	1
37912	3	23436	0
37458	0	38036	1
14747	8	13675	0
36678	6	36965	1
10933	6	2019	0
38042	2	29551	1
4966	2	2964	0
36817	2	34279	1
13874	2	19117	0
36817	2	11428	1
38089	10	33664	0
36817	2	32167	1
19232	5	21662	0
36817	2	27904	1
19640	9	21739	0
36817	2	36780	1
21599	5	11742	0
37424	2	10914	1
2360	7	17873	0
38142	2	16206	1
26281	9	4609	0
37962	0	1494	1
2410	0	37915	0
36898	3	7692	1
31301	10	18074	0
37469	3	37715	1
27800	3	37410	0
37340	0	37465	1
36942	9	33462	0
37187	2	24954	1
20291	3	12843	0
36869	3	27796	1
33848	8	11967	0
36869	6	15409	1
21509	2	298	0
36869	6	31981	1
27173	5	23441	0
36869	6	13404	1
25185	8	33334	0
36869	6	16754	1
8768	7	30825	0
36869	6	23520	1
19676	10	5520	0
36869	6	26232	1
31692	3	3339	0
36869	6	16304	1
21195	6	22799	0
36869	6	32400	1
6492	0	13875	0
36869	6	19036	1
25484	4	9252	0
36869	6	258	1
13153	10	15022	0
37877	0	10011	1
18680	6	14002	0
36804	2	18529	1
37886	10	31381	0
36555	0	19527	1
35361	2	37806	0
36731	0	36325	1
31856	2	8034	0
36731	3	27635	1
4186	10	7922	0
36610	0	37417	1
36586	0	7978	0
37164	0	11068	1
37886	3	31760	0
38024	6	5783	1
27497	8	37482	0
36930	4	36617	1
16747	5	37406	0
36887	5	11430	1
31989	2	21662	0
36887	9	13402	1
34543	1	6169	0
36792	2	23735	1
24556	4	19426	0
36792	2	16473	1
36503	6	2870	0
36696	3	11628	1
3440	1	7922	0
37721	0	18977	1
34117	8	19161	0
37721	1	25201	1
11925	8	36831	0
36734	2	7578	1
34928	10	30144	0
38013	5	25160	1
21426	6	25450	0
36984	4	22206	1
298	7	1973	0
36823	2	21925	1
3197	10	16794	0
36675	6	35645	1
161	10	11925	0
36675	6	24081	1
37749	9	11756	0
37182	4	18196	1
35921	10	38128	0
37314	0	14810	1
288	2	26486	0
37939	1	5235	1
11392	4	35972	0
37571	3	37755	1
13779	1	8545	0
37084	0	4944	1
37273	4	8454	0
36757	0	36711	1
13263	2	37908	0
37520	0	28714	1
4000	1	14609	0
36639	4	1401	1
19326	5	31800	0
36993	6	19453	1
27497	0	19722	0
38066	3	34899	1
9313	4	13802	0
37148	0	25641	1
25921	10	21824	0
37374	0	37899	1
36477	7	19347	0
38005	8	29602	1
36588	7	4293	0
38005	1	10068	1
22066	0	4300	0
37345	0	12847	1
23257	6	18650	0
37345	3	34059	1
21681	1	9037	0
37936	2	20271	1
21662	0	14604	0
37936	2	5195	1
2807	10	37530	0
36515	0	1898	1
2069	0	2883	0
38130	2	25805	1
10118	10	15921	0
37598	0	3113	1
7576	4	19052	0
37145	8	37383	1
5495	8	31239	0
37609	4	23903	1
31113	4	31551	0
37109	0	31363	1
14745	10	37732	0
37429	2	37187	1
37589	4	14245	0
36924	0	14810	1
14499	5	26764	0
37059	0	28682	1
21195	7	19161	0
38065	8	20695	1
8281	5	17082	0
38065	5	18780	1
36527	7	33664	0
38065	5	35081	1
37197	3	5410	0
37667	2	26005	1
9486	4	1512	0
37190	2	5549	1
13731	2	26091	0
37190	2	18069	1
35847	6	37898	0
37748	0	2060	1
26844	1	10933	0
37748	6	36331	1
30070	9	4966	0
37634	2	9024	1
26526	9	6007	0
37655	6	31042	1
14154	1	28273	0
37371	4	37371	1
19531	4	20484	0
36635	6	29654	1
14879	5	10579	0
37241	4	28335	1
11925	8	19676	0
36904	0	37497	1
31144	9	10920	0
36794	0	26288	1
13162	1	37531	0
36711	2	31747	1
25431	3	9061	0
36711	2	27355	1
35972	7	2229	0
36502	0	31636	1
31582	8	16856	0
37530	4	38081	1
35847	7	12283	0
38055	3	10755	1
21544	8	37896	0
36963	1	37784	1
30507	6	5867	0
36612	2	1646	1
35847	10	36981	0
36612	2	37230	1
13779	7	19052	0
36612	2	13556	1
21083	9	887	0
37155	9	37919	1
31798	4	105	0
37537	2	6960	1
18804	2	27497	0
37591	1	29429	1
34543	6	35514	0
36752	4	19859	1
2807	3	33054	0
36684	9	8113	1
23946	5	35361	0
36684	9	13617	1
34730	1	36118	0
36684	9	37125	1
25484	9	36940	0
37418	5	14347	1
17844	5	14604	0
36474	3	5808	1
36445	5	37038	0
37385	5	31953	1
34897	9	3347	0
37385	5	10127	1
5576	3	21824	0
36699	6	21744	1
13875	6	10313	0
37544	5	7397	1
37873	10	29122	0
36424	2	31979	1
27255	9	30387	0
36575	9	3604	1
21195	7	3347	0
36575	9	22163	1
13215	2	2556	0
37888	3	37564	1
31760	6	36422	0
37265	0	24740	1
23339	0	6716	0
38119	0	28996	1
37912	7	14609	0
36840	5	23132	1
44	3	21681	0
38031	4	36669	1
22481	10	15025	0
38031	5	20495	1
12775	7	8966	0
37535	8	21769	1
19081	8	14002	0
37315	5	12259	1
1693	8	32186	0
36590	0	12847	1
8900	8	37724	0
37579	0	12847	1
31239	6	27802	0
37567	0	23375	1
37513	9	2807	0
36530	2	22057	1
12986	0	9604	0
37669	3	38025	1
15472	5	23035	0
37115	4	33818	1
31989	3	19232	0
37115	3	30954	1
23632	1	1512	0
37115	5	30981	1
804	1	36588	0
37115	5	7828	1
26946	3	4293	0
37301	0	6454	1
932	6	35361	0
38128	0	9557	1
5932	9	25450	0
36616	6	29740	1
20932	2	25516	0
36442	4	25951	1
10058	2	9562	0
37387	0	32217	1
1297	8	1297	0
36953	0	2809	1
29426	6	36831	0
38067	0	13873	1
20932	8	10579	0
36997	2	7519	1
37677	9	27912	0
37958	2	37192	1
7299	6	29226	0
37958	2	13549	1
13874	4	12999	0
37974	0	21858	1
14002	5	18009	0
36991	6	37836	1
37513	8	17760	0
36912	4	27211	1
15712	7	2388	0
36912	6	17868	1
12064	0	2360	0
36450	3	37436	1
2524	3	27255	0
36450	2	18945	1
15650	2	3306	0
36450	9	3352	1
29152	3	16793	0
36777	2	31569	1
8193	8	16022	0
37089	3	10978	1
27610	9	27610	0
37695	2	21408	1
981	10	25934	0
37695	2	11401	1
31463	4	16659	0
38135	2	16236	1
23210	9	17797	0
37167	9	3742	1
18053	4	31904	0
36475	0	5117	1
19707	4	12377	0
37871	6	7605	1
7999	6	18270	0
36872	0	3303	1
17625	4	36988	0
36872	2	25476	1
9840	3	21613	0
36872	2	16656	1
34730	0	5324	0
36872	2	32635	1
6716	0	13215	0
37756	0	21858	1
15788	8	12843	0
37334	0	27546	1
26844	1	37050	0
37334	2	13584	1
37299	1	15438	0
37168	2	30788	1
16424	6	2104	0
38037	0	35856	1
36516	9	346	0
37293	0	21858	1
26511	3	12764	0
36569	0	18455	1
36988	10	18776	0
37049	8	36531	1
3353	0	13731	0
37832	0	38036	1
5576	1	9604	0
37832	3	7911	1
36584	8	28370	0
37815	1	14804	1
17256	6	5867	0
37937	2	4213	1
15788	7	6877	0
37937	2	21081	1
4891	10	27897	0
37383	2	38053	1
7554	10	4656	0
37383	2	25052	1
6716	8	15870	0
37383	2	18446	1
6092	7	21564	0
37383	2	2374	1
6141	5	28956	0
37383	2	37145	1
37530	9	15368	0
37383	2	22065	1
24555	1	19255	0
37383	2	29784	1
36118	6	16747	0
37383	2	6599	1
37528	5	3810	0
37383	2	24671	1
14745	4	36588	0
37383	2	19598	1
10887	10	30833	0
37383	2	32975	1
10773	9	23436	0
37383	2	25449	1
13779	6	16728	0
37383	2	6489	1
2947	2	38049	0
37383	2	14752	1
29426	5	4811	0
37383	2	12417	1
27817	3	33317	0
37383	2	33492	1
16747	10	7211	0
37383	2	6496	1
37513	9	8458	0
36789	0	21858	1
20800	4	25578	0
36672	0	36497	1
37814	3	29760	0
37199	4	33177	1
9037	8	27470	0
37284	0	21858	1
10773	5	14298	0
37284	6	2338	1
7987	1	37299	0
37284	6	1572	1
27470	10	29152	0
36487	6	4134	1
25934	6	26946	0
36487	6	23862	1
37299	0	3810	0
36487	6	12437	1
38089	6	24530	0
36490	0	2293	1
16373	8	7438	0
36642	2	31835	1
31551	3	887	0
36642	2	12698	1
38049	1	5244	0
36642	2	7713	1
20135	5	15022	0
37710	2	23707	1
33664	7	2625	0
37649	2	1408	1
16513	10	34772	0
37716	2	32210	1
31582	4	11065	0
37028	6	36862	1
18266	1	501	0
37267	3	20389	1
686	6	12764	0
36824	0	26857	1
34543	1	19326	0
37473	5	20325	1
37692	8	25921	0
36589	8	16346	1
31716	4	29121	0
37291	3	25051	1
5444	0	26568	0
38104	2	33517	1
37106	5	15712	0
37356	1	34276	1
26750	1	4372	0
37831	4	29789	1
37866	6	14973	0
37831	2	17546	1
12999	7	31904	0
37831	2	17077	1
31380	3	37513	0
37831	5	8492	1
26534	2	10463	0
37831	5	23346	1
2947	0	36869	0
36841	3	6986	1
4609	2	6509	0
36454	6	26412	1
37410	3	17797	0
37248	6	14442	1
8652	4	25882	0
37608	0	31363	1
37446	1	12843	0
37608	2	24337	1
22047	8	14609	0
36512	3	38011	1
21083	3	37197	0
36718	0	8666	1
26864	9	24438	0
37854	4	14826	1
18650	2	34928	0
37407	0	31462	1
24574	0	32186	0
37454	0	9258	1
37004	5	28943	0
36725	0	30255	1
28221	1	1009	0
36480	1	28032	1
37898	2	17873	0
37464	0	13800	1
27802	7	24578	0
37874	8	37467	1
9840	10	28568	0
38040	2	16310	1
14496	3	37066	0
37855	0	19436	1
16022	1	21599	0
36927	0	19527	1
7438	4	24747	0
36927	6	33317	1
13190	2	14604	0
36927	6	9914	1
28568	0	12725	0
37261	6	36512	1
9794	9	8041	0
37296	0	26005	1
38049	7	19117	0
37942	2	21013	1
35514	5	33637	0
37826	2	37826	1
37446	6	166	0
36488	0	38153	1
25882	5	12064	0
37476	0	15004	1
5191	8	19117	0
37586	4	6983	1
30070	2	9037	0
36958	6	7661	1
15252	7	1009	0
36958	6	31351	1
4609	0	343	0
36640	0	9603	1
11742	1	19676	0
38114	2	27613	1
27840	10	30294	0
37014	2	16709	1
15712	0	33054	0
37448	0	24660	1
25934	7	34599	0
37448	2	11605	1
4891	2	4609	0
37286	6	20731	1
32876	8	29579	0
36533	2	12549	1
23843	0	4123	0
36533	2	36780	1
11742	1	30294	0
36533	2	35853	1
4656	8	16673	0
36533	2	29649	1
24249	10	21429	0
36533	5	18564	1
17625	8	7275	0
36533	2	16852	1
1026	5	15712	0
36775	0	19759	1
2524	5	25596	0
37761	2	10467	1
23946	4	7507	0
37761	2	1942	1
18266	0	13190	0
37069	0	14810	1
386	6	37439	0
37680	6	28437	1
23035	2	10887	0
37680	6	26317	1
1897	7	23035	0
37680	6	21817	1
36632	7	37050	0
37680	6	34667	1
37498	8	166	0
37282	5	12083	1
7275	1	19676	0
36483	6	12661	1
37742	1	19052	0
37546	4	7918	1
14437	7	288	0
36853	0	19720	1
12775	1	13485	0
36785	3	31130	1
10887	2	3306	0
36637	4	1404	1
11065	8	4025	0
37353	0	9612	1
2870	6	4293	0
37497	0	19088	1
33334	2	32905	0
37083	2	19321	1
14604	7	37786	0
37083	2	29085	1
7554	10	31480	0
37083	2	7377	1
20978	2	13190	0
37083	2	36828	1
10313	5	21739	0
37083	2	33120	1
5093	3	31130	0
37083	2	37711	1
37898	6	37498	0
37083	2	36604	1
23210	2	3254	0
37083	2	3590	1
38118	4	1693	0
37083	2	35764	1
1026	7	38065	0
37083	2	10551	1
3197	9	2524	0
37952	0	15223	1
4300	2	15870	0
36729	2	1487	1
37273	5	37475	0
37768	3	16206	1
3987	6	10134	0
36835	9	3283	1
14685	10	17017	0
36835	9	16521	1
21738	7	517	0
37797	5	2682	1
25596	6	3897	0
36778	2	24444	1
37531	3	6492	0
36781	2	1748	1
25360	5	3820	0
36781	2	19085	1
20978	4	28525	0
36781	2	38006	1
12443	6	12724	0
37023	0	24574	1
12000	4	35093	0
37453	8	36636	1
12564	4	36988	0
36992	3	1501	1
6877	3	7211	0
37593	0	19527	1
29426	6	16450	0
36446	2	15149	1
12861	8	15252	0
36611	2	14715	1
23035	0	3349	0
37260	2	10361	1
23210	10	36983	0
36700	3	23728	1
35921	1	29426	0
36686	6	19073	1
8966	0	36842	0
37434	2	31751	1
33269	9	10118	0
37434	2	2411	1
19707	6	11487	0
38085	0	32555	1
15438	1	18311	0
36825	2	5616	1
21509	7	3877	0
36825	2	28871	1
9635	5	29579	0
37019	8	32652	1
38049	5	21738	0
37019	5	4979	1
25582	0	12283	0
38072	0	23807	1
25882	8	35093	0
36574	0	10011	1
37875	3	22066	0
36574	3	37935	1
25582	4	27656	0
36597	6	12370	1
7299	10	10578	0
36597	6	26336	1
17320	7	10773	0
37576	0	2060	1
17797	0	25060	0
37576	3	30610	1
18195	6	29226	0
37004	2	10041	1
36864	3	422	0
36989	4	36617	1
5495	3	27610	0
36989	5	36982	1
37475	2	3770	0
36989	5	36938	1
15514	4	31301	0
38015	4	16534	1
22370	4	2465	0
36791	5	574	1
38145	6	8623	0
37549	4	32349	1
37446	4	1702	0
37549	5	14330	1
2096	8	26511	0
36546	5	37199	1
3820	2	34543	0
37122	2	28506	1
8296	10	37916	0
36852	2	33650	1
501	8	21376	0
37438	2	28903	1
35361	3	2870	0
37587	0	36660	1
7978	5	12377	0
36671	0	37216	1
18567	8	3339	0
36977	3	37261	1
36852	8	31606	0
36977	10	27084	1
34928	7	844	0
36977	5	26202	1
34974	9	20135	0
37057	0	36577	1
346	10	37528	0
38137	0	14810	1
36852	2	33248	0
36737	4	16515	1
8545	10	10773	0
38039	4	5702	1
23436	9	35951	0
37397	0	22429	1
11756	6	37530	0
37312	5	15207	1
36702	8	19093	0
37835	3	3641	1
4447	0	4746	0
37040	5	1716	1
34481	4	14879	0
36899	3	37706	1
37530	3	13162	0
37840	2	5601	1
1620	8	31716	0
37229	8	13853	1
3254	4	31551	0
37515	2	25199	1
35921	10	8034	0
37052	0	14639	1
14609	1	36454	0
37357	0	23693	1
13802	6	18266	0
37394	3	6493	1
14879	0	4000	0
37285	0	23621	1
6545	2	10516	0
38056	3	37817	1
4746	4	28370	0
37077	0	24684	1
26864	4	26534	0
37725	0	24045	1
30825	8	34846	0
37779	4	21016	1
37732	2	2096	0
37779	5	6870	1
34369	10	33664	0
36828	6	20076	1
13675	0	23035	0
37731	1	16794	1
11129	4	30306	0
37399	0	22010	1
15986	2	6920	0
37399	5	19861	1
2870	2	7493	0
36520	0	16379	1
37915	1	31553	0
37770	0	24877	1
13485	8	16450	0
36712	0	37992	1
37781	6	14685	0
37465	0	37433	1
31800	10	36552	0
36942	3	37489	1
34974	9	13485	0
37955	2	17774	1
44	2	8768	0
36524	8	38043	1
5495	6	37742	0
36524	5	37349	1
34928	3	30144	0
38091	2	17742	1
1693	1	32186	0
38091	2	10734	1
15650	2	36852	0
36485	2	19270	1
37875	7	5093	0
36485	2	12548	1
1149	6	5576	0
37737	0	33950	1
12158	7	7016	0
36705	3	2278	1
31716	9	37502	0
37842	2	17584	1
34599	0	31113	0
36604	3	7847	1
4966	0	1297	0
38016	1	20653	1
36584	7	36584	0
37446	2	9781	1
8966	7	36861	0
37446	2	7928	1
31776	8	14747	0
37852	0	10011	1
4811	3	18270	0
37331	3	37775	1
27656	2	3131	0
37331	6	36452	1
14554	5	34035	0
37331	6	31005	1
4000	7	2947	0
37331	6	16838	1
37482	10	14499	0
37457	0	4595	1
30648	4	28370	0
37653	0	8832	1
10747	7	13162	0
37339	0	9798	1
26946	2	3439	0
38096	2	15132	1
31113	2	20279	0
37123	0	19527	1
19426	7	14604	0
37821	3	37197	1
18074	0	21083	0
36738	3	24708	1
1026	5	14496	0
36436	5	822	1
15921	4	34599	0
36436	5	9243	1
37797	4	23035	0
36910	0	2060	1
19347	2	34974	0
36507	2	33677	1
3197	0	14685	0
37299	2	22064	1
24574	0	27457	0
37506	8	20695	1
12986	0	36620	0
37506	5	35081	1
37531	0	10910	0
37506	5	30481	1
14588	8	36879	0
37850	2	34198	1
6992	6	24829	0
37439	5	22268	1
37875	4	15986	0
37439	5	35784	1
37908	5	3770	0
37697	0	28440	1
4966	9	13434	0
36567	2	15695	1
18941	8	36661	0
37810	3	2928	1
24556	3	37786	0
37886	5	4977	1
14496	7	6492	0
38147	3	23547	1
26511	10	2096	0
37523	6	22072	1
16826	4	34772	0
36566	0	27507	1
1711	6	18567	0
36439	3	22422	1
14647	10	31239	0
36439	6	19880	1
20932	6	7507	0
37358	0	13401	1
33664	5	3877	0
36522	3	24596	1
18680	10	33317	0
36522	6	27945	1
33848	2	34481	0
36522	6	2152	1
36527	3	8033	0
37509	6	37351	1
33334	7	10463	0
37509	6	34995	1
5867	3	3877	0
37423	0	36507	1
21739	0	37531	0
37631	3	2332	1
3877	7	22389	0
36677	2	37850	1
13675	3	25742	0
38071	2	24748	1
20135	10	9037	0
38071	2	36274	1
19407	10	31800	0
36693	6	19584	1
501	8	17844	0
36693	6	15210	1
31239	1	5093	0
37367	0	21733	1
10058	1	18650	0
37367	2	18044	1
16826	8	12000	0
37367	2	13064	1
23566	7	23566	0
36459	3	36493	1
37532	2	5867	0
37753	2	12354	1
13802	1	24556	0
37460	2	36632	1
14588	4	37847	0
36497	2	37763	1
12064	1	2360	0
38118	2	6846	1
7438	1	33027	0
36664	2	32703	1
27173	9	37475	0
37908	0	5664	1
15650	8	5324	0
37402	6	36056	1
5576	3	10923	0
37223	3	4313	1
6092	8	23946	0
37195	0	37083	1
15961	2	15961	0
37382	3	605	1
12764	9	25934	0
37665	6	28346	1
5851	3	11392	0
36476	4	36826	1
1512	6	35459	0
36889	4	22206	1
16563	0	26281	0
36809	2	15412	1
27255	0	37916	0
36809	2	13115	1
1009	6	6440	0
36743	5	32485	1
5244	5	17320	0
36444	2	11719	1
6716	5	19545	0
37410	0	26488	1
37886	0	36632	0
37548	3	37563	1
15870	10	20235	0
36644	2	16221	1
3770	6	37273	0
36644	2	37444	1
37912	8	7987	0
36644	2	13750	1
3897	9	3450	0
37058	0	896	1
343	8	3810	0
36707	0	732	1
21738	9	12999	0
36900	2	3852	1
25060	1	25432	0
37421	3	37388	1
12034	8	33649	0
37788	0	1474	1
6545	5	20135	0
37466	5	35237	1
14554	0	3306	0
37466	5	14136	1
13676	10	22047	0
37466	10	4360	1
16563	0	35951	0
38007	3	26596	1
37866	1	36477	0
37055	0	24789	1
3349	5	36218	0
37305	0	14639	1
36981	0	37152	0
36532	0	8462	1
37482	0	24829	0
37664	0	19754	1
24829	7	19081	0
37913	4	22131	1
16794	5	15689	0
36864	0	37407	1
4319	2	8281	0
37440	0	24854	1
16794	6	9129	0
37440	5	20648	1
15476	8	11129	0
37498	0	13647	1
24530	0	12724	0
37498	0	36254	1
7978	8	34928	0
38019	6	26709	1
16794	1	20978	0
37750	6	35059	1
34035	6	29122	0
38048	2	10773	1
8768	5	4372	0
37999	2	36497	1
15438	7	32058	0
37999	2	23508	1
23436	9	15438	0
37999	2	19004	1
4811	7	27470	0
37705	2	23076	1
4746	4	30648	0
37688	0	5293	1
1711	8	21824	0
37688	2	33765	1
4891	2	5244	0
37688	2	32159	1
27817	3	16856	0
37688	2	26545	1
7299	6	12725	0
37688	2	25965	1
14298	2	4891	0
37688	2	35977	1
30833	7	7211	0
37349	5	18363	1
28943	7	161	0
37349	5	19446	1
9755	3	38089	0
37349	5	32192	1
35640	9	25578	0
37349	5	26238	1
24815	5	32186	0
37268	0	10574	1
37916	4	37916	0
37222	2	17016	1
4891	9	36869	0
37222	2	36420	1
31977	5	38149	0
37411	6	5690	1
36588	6	18941	0
36646	3	23728	1
36620	8	6509	0
36435	5	20508	1
11756	6	2104	0
37414	1	15712	1
38040	7	21738	0
37573	3	7730	1
7168	3	14496	0
36618	0	15335	1
37866	3	14973	0
37202	0	38036	1
31910	5	16728	0
36433	0	23113	1
23035	5	4025	0
36433	9	15707	1
887	10	2388	0
36433	9	14965	1
21509	9	29755	0
37275	0	24897	1
36527	2	36855	0
38045	5	18544	1
36717	5	37475	0
38045	5	37021	1
3987	3	22799	0
38045	5	8705	1
12858	1	22799	0
36861	2	10782	1
2388	6	37410	0
36861	2	16287	1
5093	9	27855	0
37916	0	17220	1
15169	2	22389	0
37712	6	17869	1
35459	4	15252	0
36649	2	17915	1
27255	3	22196	0
36716	5	22200	1
18074	7	37410	0
37773	2	15032	1
9604	6	3810	0
37210	4	18196	1
26281	3	12986	0
36826	5	2883	1
9486	8	33246	0
36826	5	34705	1
30507	5	17256	0
36826	10	19007	1
29044	9	8623	0
36928	0	36903	1
24574	6	19531	0
37494	0	10626	1
2725	2	37004	0
36917	0	21376	1
11967	5	23946	0
36917	2	21988	1
24796	7	13948	0
36995	0	26132	1
37197	2	16659	0
36950	0	7858	1
37528	3	8281	0
37297	0	27656	1
23035	6	19081	0
37707	3	23728	1
3254	7	31716	0
36587	5	27014	1
1009	0	6787	0
37504	6	10555	1
27610	3	15075	0
38051	0	38017	1
6787	10	33246	0
38051	2	2983	1
24398	8	24398	0
37658	3	754	1
33624	1	15025	0
38103	0	28418	1
12443	6	24815	0
38103	2	2072	1
13043	5	14696	0
37352	0	27546	1
14604	8	31910	0
37510	3	36506	1
33334	9	4300	0
36726	1	36648	1
12439	7	8296	0
38105	0	35344	1
5324	9	18009	0
38105	2	32356	1
6141	5	19545	0
37193	3	38149	1
36942	0	25060	0
37677	3	34466	1
36527	3	37475	0
36537	0	2371	1
13948	8	10463	0
37012	8	38135	1
38149	0	36527	0
36489	0	36024	1
20135	4	32331	0
36832	0	13830	1
10118	8	35847	0
36832	3	7730	1
1973	3	38149	0
37723	0	23731	1
21739	5	11129	0
37723	4	22777	1
36855	4	25225	0
36550	0	36531	1
5495	7	2556	0
36761	2	15969	1
37050	4	16673	0
37239	2	24197	1
3385	6	36608	0
37239	5	30000	1
33248	1	34897	0
37636	0	14228	1
12861	7	36676	0
37279	1	23431	1
25572	10	23693	0
37800	4	9976	1
36608	0	2964	0
37847	0	22328	1
25225	1	24249	0
38107	0	37417	1
28956	2	6920	0
37217	2	4182	1
10773	3	20235	0
37976	0	8808	1
27656	2	35847	0
36923	4	25820	1
37152	1	12861	0
37959	0	791	1
4973	5	34117	0
36561	0	12847	1
7999	5	30294	0
37553	2	30011	1
4025	3	37478	0
36833	0	35231	1
31113	3	3254	0
37857	0	6454	1
21599	5	36864	0
37078	0	5329	1
25436	10	9037	0
37078	3	11893	1
19545	7	13779	0
37143	0	3636	1
31283	8	26864	0
37595	1	13127	1
7299	8	13676	0
37080	0	36497	1
14002	8	15650	0
36876	0	18521	1
11648	3	13190	0
37302	5	16105	1
19255	7	7493	0
37157	1	7205	1
34117	6	12858	0
37108	0	7214	1
19347	2	18776	0
37396	6	21392	1
4382	8	33248	0
36526	2	8265	1
2410	10	21564	0
36526	2	1087	1
32905	7	28956	0
37362	0	10484	1
20291	7	804	0
38022	0	24834	1
19161	9	14747	0
36549	6	15215	1
33649	10	37532	0
38029	2	35252	1
4123	5	8034	0
37132	0	37347	1
13676	1	29760	0
37132	1	16794	1
13215	10	37786	0
36568	0	12760	1
12561	5	9486	0
37224	4	36552	1
9107	8	23035	0
37948	0	4251	1
3353	1	686	0
37948	6	32706	1
3820	1	19326	0
36871	0	15826	1
13731	4	36503	0
36479	3	34007	1
422	2	22370	0
38077	3	36929	1
10578	2	11863	0
38077	6	36493	1
33848	0	13731	0
38144	2	18398	1
1702	4	34772	0
38144	9	7584	1
11925	9	17625	0
38144	9	8265	1
5851	9	17797	0
38144	9	8635	1
12439	9	4746	0
36667	2	14986	1
38137	8	14499	0
36667	2	26724	1
12996	3	12861	0
38011	6	37428	1
38118	6	26568	0
38011	6	25693	1
31856	2	8193	0
36808	0	30635	1
12283	1	31553	0
37846	2	8320	1
8033	10	12870	0
37034	2	5749	1
13190	4	23386	0
36838	0	21578	1
37749	8	21083	0
36838	2	27803	1
33453	0	37060	0
36810	0	12847	1
19232	5	2465	0
37967	4	36780	1
30294	10	11742	0
37536	0	37168	1
13779	0	2524	0
36652	2	28443	1
23693	9	10887	0
37088	1	23431	1
21376	9	30387	0
37220	8	25879	1
37478	10	14342	0
37360	0	36749	1
13591	0	24796	0
36603	0	16897	1
32950	2	14879	0
37134	5	32870	1
31283	7	9129	0
37134	5	13926	1
7299	9	31692	0
37134	5	10858	1
13676	7	36702	0
36692	0	27726	1
37896	4	5520	0
36692	3	27880	1
13675	1	1897	0
37093	2	36305	1
37365	0	14609	0
37769	8	32652	1
30825	3	23843	0
37769	4	36826	1
4656	8	8033	0
37447	0	19720	1
12564	10	31144	0
37447	2	28216	1
8336	2	3439	0
37447	2	34865	1
19358	0	6980	0
36591	4	33064	1
5191	2	346	0
36998	4	16267	1
23386	0	37532	0
36998	9	36074	1
2524	3	15689	0
38109	2	28566	1
7211	8	35492	0
38116	5	3190	1
21544	0	26526	0
38116	5	9057	1
19255	10	14745	0
36768	0	14611	1
23386	8	12034	0
37000	1	16794	1
30552	3	36118	0
37765	2	32448	1
10118	7	166	0
37734	2	5800	1
10463	1	9252	0
37526	3	37706	1
24578	1	13779	0
37485	0	37035	1
25596	0	3197	0
38017	2	38051	1
15368	7	3063	0
38006	2	19550	1
32950	3	37152	0
38006	2	32820	1
9037	9	29426	0
36624	6	32674	1
15980	10	29122	0
37589	0	18922	1
4000	9	22914	0
37377	3	37848	1
14611	4	12034	0
37844	8	25354	1
3820	5	12564	0
37659	4	7083	1
4973	8	14499	0
37905	0	15443	1
36218	10	14342	0
37158	8	21977	1
28943	4	33027	0
38132	2	13926	1
15689	2	37916	0
38133	9	18121	1
3450	7	13591	0
36585	6	8127	1
19232	6	8545	0
36658	3	11609	1
2465	1	21376	0
37792	0	3554	1
29659	6	24555	0
36758	6	29963	1
12377	5	13190	0
36770	2	33044	1
36218	8	4382	0
36786	3	36869	1
35514	1	16793	0
36534	0	32555	1
16793	0	1344	0
36990	3	26928	1
33848	7	26946	0
36975	0	37936	1
36983	10	11392	0
36498	2	25230	1
13731	8	12000	0
38098	0	17292	1
26864	8	37916	0
36441	0	35770	1
6141	1	37786	0
37068	4	33818	1
422	6	9037	0
37068	5	36994	1
422	7	34846	0
37068	5	5670	1
37482	0	8314	0
37068	5	36523	1
20695	1	31301	0
37066	1	10068	1
9061	6	2104	0
38153	0	20685	1
17082	2	38145	0
36698	0	19527	1
7999	1	37896	0
37115	3	10863	1
8281	8	37912	0
37620	1	1590	1
9794	2	15802	0
37729	2	36518	1
12861	5	21739	0
36494	0	10309	1
298	2	36879	0
37163	0	13830	1
36471	4	12999	0
36812	0	37083	1
35514	1	37866	0
37442	9	11718	1
37886	1	37886	0
37442	9	615	1
14002	5	7211	0
37698	3	6021	1
12048	0	35361	0
36819	5	7708	1
37502	8	9486	0
37467	0	14874	1
37866	2	13485	0
37914	0	36024	1
31301	6	8480	0
36491	0	8588	1
16856	6	27912	0
37639	0	9557	1
20135	10	29426	0
37639	6	30608	1
14696	2	19255	0
37639	6	16023	1
4973	5	11782	0
36581	3	31537	1
14696	3	7493	0
36606	3	23214	1
35361	5	7211	0
37657	6	27726	1
14437	4	28525	0
37657	6	37848	1
31910	7	19232	0
36932	0	18455	1
4319	6	2472	0
36805	0	37802	1
28273	7	23566	0
36727	4	30693	1
8458	2	31113	0
37633	5	32915	1
28943	0	30070	0
36499	5	4748	1
29426	2	17625	0
38123	0	11068	1
37379	2	29760	0
37221	2	29605	1
11742	9	7816	0
36601	6	26924	1
36471	1	36869	0
37841	6	35326	1
11487	3	25225	0
37979	6	37543	1
24578	7	8545	0
37794	5	36717	1
37601	5	15689	0
37391	0	23149	1
37886	9	16856	0
37036	0	30150	1
37365	9	19093	0
37818	0	9615	1
15476	0	11756	0
36831	0	1484	1
35847	6	18941	0
37298	4	14467	1
26526	9	10920	0
37298	4	31988	1
37299	2	18195	0
37610	0	14810	1
15472	6	11487	0
37610	3	29805	1
36608	5	12564	0
36668	6	26852	1
4382	10	24398	0
37044	6	37036	1
37066	9	10910	0
37375	0	36763	1
12377	8	15472	0
37225	0	21774	1
7016	9	1026	0
37225	2	23154	1
5495	4	26486	0
36622	0	37994	1
12564	5	26750	0
36622	2	17612	1
32717	7	3353	0
37623	2	12004	1
32331	2	4966	0
36784	2	27190	1
24574	0	25413	0
37514	0	21858	1
35514	8	21599	0
37209	0	16611	1
10887	1	27817	0
37807	0	19041	1
36552	5	4811	0
37441	3	29805	1
37197	6	29121	0
37320	3	21949	1
15169	10	34928	0
37320	2	27714	1
12443	1	15472	0
37320	2	19776	1
25432	0	7922	0
37320	2	32933	1
23436	4	4891	0
37320	2	3790	1
4447	3	11648	0
37320	2	33906	1
7693	1	19722	0
37373	0	19527	1
4811	1	26750	0
37373	6	25892	1
14437	0	25484	0
37580	2	35180	1
3877	2	28045	0
37484	3	30512	1
30825	9	25247	0
37484	6	721	1
31798	4	16563	0
37484	6	19156	1
33269	9	33453	0
37484	6	14138	1
3131	3	10118	0
37484	6	20474	1
2323	6	24398	0
37829	0	19542	1
37439	10	27457	0
37016	0	21235	1
15650	4	19161	0
38033	2	8872	1
17625	4	4966	0
37262	5	23911	1
2883	3	13390	0
36983	8	19794	1
28045	2	14342	0
37572	4	37572	1
18414	6	15921	0
36750	0	37704	1
28525	8	20978	0
36750	4	1202	1
19358	3	29141	0
36493	3	38077	1
14609	2	37692	0
36501	2	37773	1
31606	3	34035	0
38156	3	3787	1
12443	10	14611	0
37660	3	28746	1
16471	0	6980	0
38002	2	36275	1
37106	8	30306	0
37726	3	13142	1
25484	8	16794	0
38080	3	28421	1
1693	8	12870	0
38080	5	38080	1
10463	6	3897	0
36971	1	16794	1
343	8	31904	0
37086	0	13282	1
33453	0	25882	0
38120	3	18100	1
17797	5	37038	0
38120	2	26669	1
15832	7	36632	0
38113	2	15795	1
6920	5	18266	0
37795	6	8230	1
8545	2	22370	0
37772	3	14179	1
16471	7	5851	0
36925	3	20791	1
12048	8	3131	0
36925	6	32953	1
37439	5	36855	0
37893	2	5107	1
27912	6	38118	0
37893	2	2655	1
24438	2	18266	0
36615	2	10856	1
37725	3	21429	0
36615	2	15099	1
32186	0	12443	0
38148	2	19518	1
36717	8	14611	0
38148	2	33803	1
22914	4	18053	0
36513	0	36774	1
26534	8	31989	0
37926	2	16639	1
10933	6	36920	0
37926	2	5492	1
6141	10	37916	0
37038	4	30581	1
19707	10	37532	0
37341	4	37132	1
29760	1	36620	0
37067	3	29884	1
18195	2	517	0
36607	2	30911	1
5851	4	3063	0
36746	3	1909	1
23566	0	23566	0
37428	5	21487	1
24087	8	17844	0
37798	6	35388	1
30294	4	36608	0
37849	8	2647	1
24530	1	24249	0
37849	5	10566	1
33269	1	16826	0
37749	0	17140	1
19918	3	8545	0
37749	1	15712	1
12870	0	9562	0
37920	3	10677	1
15025	1	9635	0
36842	2	28253	1
16022	6	36477	0
37583	2	30383	1
1702	2	3131	0
37547	0	2509	1
21824	5	517	0
36470	0	21245	1
37908	10	5444	0
36634	0	11068	1
31551	6	30306	0
38046	0	31462	1
29426	8	33719	0
38046	2	18409	1
9129	0	25484	0
37906	0	32677	1
26281	0	36972	0
37507	3	37706	1
2947	3	4000	0
38111	0	30693	1
25060	9	17797	0
36793	0	36498	1
5932	10	24555	0
37550	0	29491	1
6007	10	37896	0
37395	2	29233	1
5520	4	26750	0
37403	2	37627	1
23632	3	37066	0
38154	3	14149	1
23566	7	36620	0
37640	3	20397	1
3439	0	25516	0
36579	2	35580	1
31989	4	22370	0
36636	2	1979	1
36503	7	6877	0
36636	2	247	1
36983	3	25432	0
36636	2	33778	1
13153	10	26750	0
36636	2	37701	1
22148	3	32186	0
36636	2	21500	1
12996	0	20088	0
36636	2	8482	1
14496	0	1009	0
36636	2	2998	1
24530	5	21429	0
36636	2	34523	1
32058	0	5191	0
36636	2	5415	1
4746	8	26864	0
37405	1	37621	1
8454	4	33649	0
38062	0	30698	1
31381	8	16747	0
37184	5	8935	1
26750	4	26526	0
37525	0	36024	1
37770	5	21160	0
37897	0	2392	1
24555	7	166	0
36655	5	25470	1
24578	1	24556	0
38092	0	32555	1
6877	6	166	0
38092	3	23728	1
1009	7	31380	0
37333	3	37372	1
29198	5	37866	0
37333	2	20171	1
5444	5	22148	0
36799	3	4248	1
932	10	25450	0
38000	2	1057	1
10747	9	28176	0
37931	4	31359	1
12064	1	36661	0
36879	0	28844	1
16388	9	16513	0
36715	2	37774	1
19545	9	5495	0
36697	0	37734	1
4000	1	25450	0
37882	4	2852	1
35361	1	166	0
37882	2	35695	1
36842	10	34974	0
37501	8	37383	1
3197	8	13215	0
37274	5	1467	1
12986	10	38040	0
37274	5	14628	1
38089	8	8454	0
37554	4	5419	1
21544	3	3820	0
37324	0	37335	1
8966	8	19407	0
38030	3	11609	1
32872	2	25432	0
38030	6	7121	1
2883	6	9635	0
36471	0	27242	1
25225	4	36530	0
36471	2	17980	1
1715	6	21426	0
36471	2	37236	1
36584	7	2556	0
37746	6	27984	1
8033	5	11487	0
37746	6	28250	1
4966	0	26526	0
37746	6	11720	1
19358	4	30306	0
37925	0	36325	1
11648	6	24556	0
37470	3	5074	1
37365	1	8623	0
37470	2	9324	1
37475	7	38149	0
36663	4	263	1
15832	4	37886	0
36753	6	31296	1
5244	9	17690	0
37727	2	20940	1
27897	10	17690	0
37727	2	16166	1
14647	4	18266	0
37752	2	3746	1
8034	3	10920	0
37273	3	37435	1
13591	5	13591	0
37273	6	17110	1
30825	1	19347	0
36862	0	24877	1
1897	5	5324	0
36862	3	37028	1
25516	7	37806	0
37561	0	35756	1
29595	1	32331	0
37056	8	36131	1
1512	0	23632	0
37056	8	9093	1
6101	6	34117	0
36806	0	27068	1
21160	7	9635	0
36806	2	20338	1
5699	3	37050	0
37126	3	31912	1
3820	7	31856	0
36648	9	5106	1
37502	10	25431	0
36648	9	5337	1
37732	9	686	0
36648	9	4998	1
2870	5	8336	0
36648	9	9710	1
9107	5	15832	0
36648	9	7589	1
10923	5	29588	0
36648	9	18576	1
36988	0	1344	0
36648	9	29747	1
16747	9	15980	0
36648	9	7804	1
31989	2	14437	0
36648	9	7316	1
2625	4	38149	0
36648	9	14445	1
9107	5	36852	0
36648	9	21511	1
23881	6	27817	0
36648	9	29711	1
37677	3	31776	0
36648	9	503	1
13043	0	15961	0
36648	9	23812	1
23881	0	21195	0
36648	9	29237	1
28943	1	36988	0
36648	9	38027	1
12999	10	10923	0
36648	9	36472	1
37530	2	25060	0
36648	9	4558	1
27656	7	17873	0
36648	9	8233	1
26864	2	17844	0
36648	9	22755	1
17844	5	10463	0
36648	9	36726	1
36676	5	12048	0
36648	9	12418	1
6141	6	30387	0
36648	9	24148	1
37382	3	6101	0
36648	9	26493	1
15075	10	30387	0
36648	9	811	1
1702	0	16826	0
36648	9	17232	1
15870	1	9252	0
36648	9	4239	1
37725	1	23257	0
36648	9	10008	1
11925	4	36831	0
37317	0	3113	1
16659	1	25060	0
37251	5	21966	1
10923	10	19117	0
37251	5	3395	1
1711	7	28273	0
37752	2	32698	1
19407	3	37896	0
38082	0	10734	1
36942	5	14496	0
36874	0	22118	1
10134	5	38137	0
36874	4	35725	1
7507	9	932	0
37834	0	25507	1
24574	5	386	0
36756	0	31241	1
36852	6	12858	0
36660	2	37587	1
8034	5	4372	0
37592	0	12901	1
13215	6	17844	0
38004	3	6705	1
27457	4	2883	0
36800	6	11398	1
37886	1	25742	0
36432	0	36205	1
12064	0	2360	0
36744	0	38107	1
686	10	12283	0
37070	4	24009	1
14685	8	37781	0
37070	2	36940	1
36861	1	36861	0
37596	8	38048	1
38065	5	27664	0
37596	4	15236	1
26526	2	25257	0
37885	0	9603	1
16424	10	29141	0
37885	6	36597	1
8652	4	12048	0
36926	0	17722	1
13948	3	26534	0
38122	0	24740	1
7275	2	10516	0
36736	2	30920	1
36471	6	343	0
36505	0	32478	1
21599	2	21599	0
36505	3	37388	1
24438	1	31910	0
37560	2	14713	1
7275	5	14780	0
37560	2	11977	1
13874	6	29226	0
37529	2	37590	1
8454	6	37273	0
37529	2	30958	1
33462	9	37749	0
37443	1	35124	1
2807	6	35459	0
37045	3	36487	1
37732	6	1702	0
37045	6	1188	1
36852	5	27912	0
38068	0	11340	1
31480	4	18074	0
38068	3	29025	1
5660	7	3440	0
38081	0	13853	1
21599	10	11742	0
38081	5	37530	1
19255	9	11967	0
37029	0	31112	1
9794	7	4319	0
37029	3	37024	1
22914	5	38040	0
37743	4	3672	1
7211	7	5932	0
37896	0	19527	1
18567	2	21824	0
37896	6	4354	1
32950	8	13731	0
36868	0	5614	1
29044	0	29226	0
36563	5	38009	1
2104	0	27664	0
36517	4	27950	1
2360	9	7493	0
37870	0	29157	1
28956	8	2524	0
[truncated: 2,862 more rows]
