# Supplementary material
Source: ML conference proceedings conference paper supplement (https://proceedings.neurips.cc/paper_files/paper/2021/hash/0fd600c953cde8121262e322ef09f70e-Abstract.html)
Supplement: Supplementary file 1 [file 0fd600c953cde8121262e322ef09f70e-Supplemental.zip › Supplementary_Material_Paper_8745/data/Hamaguchi-BM_head-5000/test/test-random-sample/test7.txt]

38038	0	13590	1
32905	9	8296	0
37961	2	21629	1
21613	10	27640	0
37786	2	21674	1
18270	2	35514	0
37125	0	9144	1
38149	5	14611	0
37706	6	33781	1
13485	7	29152	0
37706	6	4066	1
6930	2	7875	0
37706	2	2163	1
13390	3	12034	0
37706	6	34609	1
37900	1	38104	0
37706	6	16086	1
37382	6	21195	0
37706	6	3596	1
6980	4	11392	0
37706	6	33602	1
686	3	981	0
37706	6	30633	1
5093	4	33334	0
37706	6	31350	1
36879	7	37050	0
37732	8	21977	1
31606	3	29122	0
36920	0	18455	1
38118	9	2069	0
36920	6	30072	1
29755	6	26568	0
37431	0	21858	1
26864	8	28525	0
37431	3	5512	1
18053	2	14609	0
36503	9	19295	1
10579	6	932	0
36452	6	23095	1
15472	0	12034	0
37256	6	32897	1
21789	2	8768	0
37175	0	1494	1
37379	10	36869	0
37995	0	38058	1
887	0	32872	0
37995	2	19334	1
12439	7	501	0
36617	5	36348	1
26750	8	11141	0
36617	5	37969	1
10813	5	25484	0
36617	5	3479	1
36661	5	34481	0
36617	5	37281	1
14002	8	2019	0
37683	4	8226	1
16388	3	37732	0
37740	1	27492	1
5191	2	8623	0
36559	4	3873	1
36218	2	6992	0
37452	3	37746	1
13215	6	7576	0
37490	0	38106	1
17256	3	13190	0
36883	2	5309	1
31800	9	31144	0
36760	2	28698	1
19358	5	23210	0
36760	2	15844	1
14437	10	22370	0
37527	1	38144	1
36586	8	4656	0
37408	0	22280	1
36708	9	2018	0
37408	2	19626	1
11648	7	8545	0
37408	2	23911	1
10910	10	13162	0
37718	0	11318	1
22163	1	7706	0
37487	5	10055	1
37915	6	166	0
37412	4	34985	1
35492	3	21564	0
37820	1	2195	1
14696	2	37986	0
36614	3	13925	1
29528	6	37317	0
38095	9	20539	1
30734	2	25664	0
38095	9	20083	1
4891	2	37911	0
37676	0	12847	1
4966	8	12775	0
36552	5	7602	1
37197	0	38065	0
36552	5	6623	1
10463	7	19052	0
37351	0	23693	1
18270	4	21789	0
37351	3	37509	1
17797	10	37749	0
37351	6	20995	1
36702	10	21738	0
36795	1	6886	1
2556	4	4746	0
36690	0	36504	1
28273	9	37911	0
38078	6	4844	1
15121	4	33664	0
36495	2	10254	1
19640	6	6787	0
36495	2	37611	1
18804	4	3349	0
36495	2	38140	1
14745	1	37060	0
36495	2	12686	1
32058	0	16563	0
36495	2	4171	1
18311	10	12999	0
36495	2	30916	1
22481	10	37050	0
36495	2	11884	1
36471	4	17082	0
37996	0	32555	1
36940	9	14604	0
37663	1	26796	1
14745	7	37152	0
37475	2	20536	1
25882	3	20088	0
36632	2	27167	1
20088	8	10579	0
37144	3	1033	1
12377	1	10933	0
37099	6	13451	1
36503	6	7211	0
37099	6	37402	1
25934	10	33269	0
37099	6	7680	1
32950	3	1715	0
37099	6	7730	1
34035	7	19161	0
37099	6	26613	1
22370	0	23339	0
37868	0	11719	1
25267	5	1027	0
37278	0	26360	1
25450	0	8652	0
36966	2	36580	1
37482	8	31381	0
37899	3	4039	1
35921	8	8034	0
37458	0	38036	1
22163	9	36599	0
36678	6	36965	1
24325	1	13263	0
38042	2	29551	1
15453	8	5069	0
36817	2	34279	1
1702	6	26946	0
36817	2	11428	1
37011	9	25267	0
36817	2	32167	1
3131	9	37732	0
36817	2	27904	1
28045	2	34035	0
36817	2	36780	1
23441	7	24249	0
37424	2	10914	1
37058	0	11790	0
38142	2	16206	1
25921	6	38145	0
37962	0	1494	1
6440	6	31716	0
36898	3	7692	1
8314	0	18009	0
37469	3	37715	1
21681	0	14973	0
37340	0	37465	1
20088	1	5932	0
37187	2	24954	1
5821	7	18315	0
36869	3	27796	1
20978	4	37875	0
36869	6	15409	1
10578	4	4609	0
36869	6	31981	1
12858	0	19081	0
36869	6	13404	1
2465	3	10773	0
36869	6	16754	1
15438	5	18053	0
36869	6	23520	1
37011	3	36666	0
36869	6	26232	1
21613	9	29760	0
36869	6	16304	1
8480	3	5660	0
36869	6	32400	1
3877	6	6122	0
36869	6	19036	1
2472	9	10578	0
36869	6	258	1
23210	10	32475	0
37877	0	10011	1
16196	3	6122	0
36804	2	18529	1
31144	10	33027	0
36555	0	19527	1
33246	10	37038	0
36731	0	36325	1
6716	10	288	0
36731	3	27635	1
17797	6	14496	0
36610	0	37417	1
37004	7	36608	0
37164	0	11068	1
3439	2	37898	0
38024	6	5783	1
2229	2	7168	0
36930	4	36617	1
34035	1	24087	0
36887	5	11430	1
12775	5	14780	0
36887	9	13402	1
8623	0	14298	0
36792	2	23735	1
31904	1	346	0
36792	2	16473	1
28525	0	14647	0
36696	3	11628	1
9061	5	12158	0
37721	0	18977	1
209	1	21365	0
37721	1	25201	1
10747	6	38065	0
36734	2	7578	1
9486	0	32872	0
38013	5	25160	1
30306	5	1026	0
36984	4	22206	1
32652	7	37673	0
36823	2	21925	1
8545	3	16728	0
36675	6	35645	1
11141	5	16022	0
36675	6	24081	1
686	6	7507	0
37182	4	18196	1
2096	7	6092	0
37314	0	14810	1
37916	0	14245	0
37939	1	5235	1
37875	1	31989	0
37571	3	37755	1
29426	5	19326	0
37084	0	4944	1
19722	3	971	0
36757	0	36711	1
7493	8	36588	0
37520	0	28714	1
24325	9	22148	0
36639	4	1401	1
17256	7	31977	0
36993	6	19453	1
36666	1	4236	0
38066	3	34899	1
27470	9	17625	0
37148	0	25641	1
37732	6	37732	0
37374	0	37899	1
4609	1	38049	0
38005	8	29602	1
4186	10	1026	0
38005	1	10068	1
36842	1	19347	0
37345	0	12847	1
31381	2	27817	0
37345	3	34059	1
4293	2	4293	0
37936	2	20271	1
12861	10	37986	0
37936	2	5195	1
15034	8	37357	0
36515	0	1898	1
6716	2	36666	0
38130	2	25805	1
37589	4	25185	0
37598	0	3113	1
21681	1	33637	0
37145	8	37383	1
2410	2	20291	0
37609	4	23903	1
14864	6	30126	0
37109	0	31363	1
34117	7	31776	0
37429	2	37187	1
1009	1	7168	0
36924	0	14810	1
16373	2	21789	0
37059	0	28682	1
15022	3	17625	0
38065	8	20695	1
10813	2	6141	0
38065	5	18780	1
12443	6	33624	0
38065	5	35081	1
13591	0	24578	0
37667	2	26005	1
633	0	29222	0
37190	2	5549	1
14611	9	34369	0
37190	2	18069	1
16793	8	25257	0
37748	0	2060	1
14864	10	19814	0
37748	6	36331	1
16659	1	20695	0
37634	2	9024	1
28221	10	37749	0
37655	6	31042	1
34543	2	12775	0
37371	4	37371	1
14609	0	29226	0
36635	6	29654	1
1973	5	19707	0
37241	4	28335	1
5851	2	5851	0
36904	0	37497	1
26486	9	15870	0
36794	0	26288	1
11756	8	37513	0
36711	2	31747	1
17797	2	16659	0
36711	2	27355	1
30552	10	26844	0
36502	0	31636	1
31480	2	16659	0
37530	4	38081	1
16793	1	36988	0
38055	3	10755	1
16856	6	26844	0
36963	1	37784	1
5576	0	18567	0
36612	2	1646	1
37677	10	14499	0
36612	2	37230	1
9690	7	21365	0
36612	2	13556	1
8034	3	29198	0
37155	9	37919	1
34846	9	34974	0
37537	2	6960	1
4236	8	19319	0
37591	1	29429	1
16471	10	3254	0
36752	4	19859	1
13802	3	21662	0
36684	9	8113	1
9313	9	27855	0
36684	9	13617	1
26281	7	36516	0
36684	9	37125	1
33334	7	24438	0
37418	5	14347	1
37912	6	9604	0
36474	3	5808	1
11141	6	7275	0
37385	5	31953	1
28221	4	31380	0
37385	5	10127	1
11863	0	38049	0
36699	6	21744	1
7706	8	29817	0
37544	5	7397	1
29226	2	4319	0
36424	2	31979	1
36454	5	1149	0
36575	9	3604	1
33848	7	14879	0
36575	9	22163	1
30375	2	37673	0
37888	3	37564	1
37875	9	18266	0
37265	0	24740	1
3440	8	37596	0
38119	0	28996	1
17873	5	33269	0
36840	5	23132	1
37596	4	12437	0
38031	4	36669	1
37379	10	36620	0
38031	5	20495	1
37066	7	5410	0
37535	8	21769	1
27255	10	16728	0
37315	5	12259	1
8314	3	16902	0
36590	0	12847	1
26534	4	15075	0
37579	0	12847	1
35492	7	6092	0
37567	0	23375	1
4300	0	6920	0
36530	2	22057	1
31144	7	26526	0
37669	3	38025	1
36852	9	37050	0
37115	4	33818	1
8527	9	36708	0
37115	3	30954	1
3770	2	34590	0
37115	5	30981	1
27032	1	22914	0
37115	5	7828	1
27664	9	6440	0
37301	0	6454	1
29122	0	37724	0
38128	0	9557	1
25450	8	20932	0
36616	6	29740	1
6492	10	10313	0
36442	4	25951	1
7493	8	20932	0
37387	0	32217	1
21613	3	9794	0
36953	0	2809	1
4123	1	19326	0
38067	0	13873	1
7693	0	15832	0
36997	2	7519	1
5244	1	18053	0
37958	2	37192	1
8652	8	36588	0
37958	2	13549	1
25450	5	1715	0
37974	0	21858	1
22799	2	37873	0
36991	6	37836	1
27255	2	19232	0
36912	4	27211	1
3778	0	35093	0
36912	6	17868	1
37410	8	16659	0
36450	3	37436	1
5495	0	20235	0
36450	2	18945	1
8966	0	26750	0
36450	9	3352	1
36661	8	33453	0
36777	2	31569	1
36972	6	19117	0
37089	3	10978	1
1693	10	14647	0
37695	2	21408	1
28956	8	31239	0
37695	2	11401	1
33027	8	18776	0
38135	2	16236	1
17760	1	28221	0
37167	9	3742	1
12437	4	32475	0
36475	0	5117	1
36218	9	14554	0
37871	6	7605	1
8119	2	22196	0
36872	0	3303	1
19232	5	15986	0
36872	2	25476	1
37299	1	37299	0
36872	2	16656	1
31034	9	6716	0
36872	2	32635	1
37528	3	15802	0
37756	0	21858	1
17760	5	9061	0
37334	0	27546	1
17625	8	25257	0
37334	2	13584	1
3639	4	30734	0
37168	2	30788	1
29222	2	5164	0
38037	0	35856	1
38089	10	36527	0
37293	0	21858	1
7922	3	7922	0
36569	0	18455	1
8458	2	37197	0
37049	8	36531	1
37011	0	18315	0
37832	0	38036	1
12064	2	12843	0
37832	3	7911	1
161	2	36831	0
37815	1	14804	1
5404	10	5576	0
37937	2	4213	1
36527	10	22389	0
37937	2	21081	1
9252	10	20235	0
37383	2	38053	1
19307	5	18076	0
37383	2	25052	1
23350	3	26922	0
37383	2	18446	1
10910	4	32872	0
37383	2	2374	1
2807	9	887	0
37383	2	37145	1
17873	0	34599	0
37383	2	22065	1
16747	1	10887	0
37383	2	29784	1
4966	2	8034	0
37383	2	6599	1
161	1	1297	0
37383	2	24671	1
11824	7	14342	0
37383	2	19598	1
37502	3	37038	0
37383	2	32975	1
18776	6	23843	0
37383	2	25449	1
28370	0	21662	0
37383	2	6489	1
19307	2	29222	0
37383	2	14752	1
27802	8	37742	0
37383	2	12417	1
31480	2	32876	0
37383	2	33492	1
22481	2	37050	0
37383	2	6496	1
10579	1	23946	0
36789	0	21858	1
14611	0	36527	0
36672	0	36497	1
5124	0	35951	0
37199	4	33177	1
26091	2	17873	0
37284	0	21858	1
5410	6	887	0
37284	6	2338	1
15022	5	6007	0
37284	6	1572	1
29141	10	11392	0
36487	6	4134	1
12439	2	19052	0
36487	6	23862	1
27497	5	37050	0
36487	6	12437	1
21122	5	21002	0
36490	0	2293	1
8652	10	13731	0
36642	2	31835	1
36666	2	36469	0
36642	2	12698	1
1693	2	37273	0
36642	2	7713	1
38065	0	3254	0
37710	2	23707	1
17844	2	26486	0
37649	2	1408	1
7642	7	29817	0
37716	2	32210	1
21426	4	36661	0
37028	6	36862	1
33269	3	24555	0
37267	3	20389	1
15476	2	38065	0
36824	0	26857	1
33498	1	4236	0
37473	5	20325	1
16373	1	4966	0
36589	8	16346	1
8119	10	10463	0
37291	3	25051	1
11392	6	11392	0
38104	2	33517	1
4891	1	5314	0
37356	1	34276	1
15453	1	14746	0
37831	4	29789	1
12986	9	18195	0
37831	2	17546	1
28273	4	15438	0
37831	2	17077	1
36599	0	37011	0
37831	5	8492	1
31301	0	28221	0
37831	5	23346	1
28417	10	633	0
36841	3	6986	1
27800	7	10910	0
36454	6	26412	1
12000	0	23946	0
37248	6	14442	1
25257	0	2964	0
37608	0	31363	1
38118	5	24398	0
37608	2	24337	1
36852	7	971	0
36512	3	38011	1
25432	6	15368	0
36718	0	8666	1
7875	8	26937	0
37854	4	14826	1
23946	8	18941	0
37407	0	31462	1
37050	1	386	0
37454	0	9258	1
18306	2	34035	0
36725	0	30255	1
35847	4	12064	0
36480	1	28032	1
25516	1	26946	0
37464	0	13800	1
38049	0	5124	0
37874	8	37467	1
2964	8	6169	0
38040	2	16310	1
4236	0	36666	0
37855	0	19436	1
37994	3	18414	0
36927	0	19527	1
34772	3	35847	0
36927	6	33317	1
2019	3	34897	0
36927	6	9914	1
25436	0	36861	0
37261	6	36512	1
38040	6	14298	0
37296	0	26005	1
18195	4	4609	0
37942	2	21013	1
15712	8	37531	0
37826	2	37826	1
34543	6	36988	0
36488	0	38153	1
8454	9	24249	0
37476	0	15004	1
10532	10	14609	0
37586	4	6983	1
35459	8	3440	0
36958	6	7661	1
12034	4	10933	0
36958	6	31351	1
14746	2	30375	0
36640	0	9603	1
34590	4	19531	0
38114	2	27613	1
36608	1	36552	0
37014	2	16709	1
34481	7	3439	0
37448	0	24660	1
1702	4	37060	0
37448	2	11605	1
3820	1	22050	0
37286	6	20731	1
31480	0	22389	0
36533	2	12549	1
15034	6	37058	0
36533	2	36780	1
27861	4	18667	0
36533	2	35853	1
33027	9	35921	0
36533	2	29649	1
34730	8	23881	0
36533	5	18564	1
37596	7	32872	0
36533	2	16852	1
24398	1	4095	0
36775	0	19759	1
19722	4	8900	0
37761	2	10467	1
14554	7	34730	0
37761	2	1942	1
32872	2	28176	0
37069	0	14810	1
8458	6	37596	0
37680	6	28437	1
9562	8	24325	0
37680	6	26317	1
11065	10	24829	0
37680	6	21817	1
14298	5	31798	0
37680	6	34667	1
22047	5	31798	0
37282	5	12083	1
14609	5	105	0
36483	6	12661	1
14499	6	30552	0
37546	4	7918	1
19640	7	2388	0
36853	0	19720	1
37357	9	2800	0
36785	3	31130	1
31113	10	5932	0
36637	4	1404	1
36471	10	8041	0
37353	0	9612	1
8454	8	33624	0
37497	0	19088	1
5444	9	37908	0
37083	2	19321	1
20998	8	5210	0
37083	2	29085	1
38145	8	10773	0
37083	2	7377	1
7816	9	16793	0
37083	2	36828	1
7299	7	18567	0
37083	2	33120	1
38052	4	18076	0
37083	2	37711	1
21195	1	31582	0
37083	2	36604	1
1620	1	38065	0
37083	2	3590	1
346	3	18195	0
37083	2	35764	1
13043	2	12048	0
37083	2	10551	1
12963	8	7400	0
37952	0	15223	1
36118	5	26764	0
36729	2	1487	1
2229	5	33462	0
37768	3	16206	1
28221	0	31551	0
36835	9	3283	1
11648	4	17017	0
36835	9	16521	1
19081	1	16196	0
37797	5	2682	1
13731	2	25450	0
36778	2	24444	1
37770	8	298	0
36781	2	1748	1
20135	1	36831	0
36781	2	19085	1
28045	5	25578	0
36781	2	38006	1
13190	8	5699	0
37023	0	24574	1
28568	4	16563	0
37453	8	36636	1
6141	2	10463	0
36992	3	1501	1
25606	1	33453	0
37593	0	19527	1
37866	1	25436	0
36446	2	15149	1
37908	7	16673	0
36611	2	14715	1
28176	7	35972	0
37260	2	10361	1
24530	5	33649	0
36700	3	23728	1
5093	0	13802	0
36686	6	19073	1
33637	0	2725	0
37434	2	31751	1
36218	7	37555	0
37434	2	2411	1
37066	9	3440	0
38085	0	32555	1
24398	1	37797	0
36825	2	5616	1
4609	6	31692	0
36825	2	28871	1
36852	5	27912	0
37019	8	32652	1
37382	1	11782	0
37019	5	4979	1
37273	8	1973	0
38072	0	23807	1
37482	9	34897	0
36574	0	10011	1
26091	9	37915	0
36574	3	37935	1
1094	0	21613	0
36597	6	12370	1
19490	1	19307	0
36597	6	26336	1
33664	1	34928	0
37576	0	2060	1
33248	1	37886	0
37576	3	30610	1
18941	7	166	0
37004	2	10041	1
35921	6	13434	0
36989	4	36617	1
18315	2	4236	0
36989	5	36982	1
19545	0	9129	0
36989	5	36938	1
1620	9	15514	0
38015	4	16534	1
36879	10	21429	0
36791	5	574	1
30825	7	34846	0
37549	4	32349	1
38040	7	36972	0
37549	5	14330	1
32876	10	19426	0
36546	5	37199	1
28568	7	105	0
37122	2	28506	1
31301	10	2229	0
36852	2	33650	1
31606	5	34117	0
37438	2	28903	1
981	6	33269	0
37587	0	36660	1
31553	7	20932	0
36671	0	37216	1
19347	5	1861	0
36977	3	37261	1
4000	7	2947	0
36977	10	27084	1
32331	9	25247	0
36977	5	26202	1
29198	3	20135	0
37057	0	36577	1
30294	9	27470	0
38137	0	14810	1
5164	4	149	0
36737	4	16515	1
37532	8	27457	0
38039	4	5702	1
3778	2	32717	0
37397	0	22429	1
10747	10	36942	0
37312	5	15207	1
5576	3	5191	0
37835	3	3641	1
8527	7	11508	0
37040	5	1716	1
18074	1	3254	0
36899	3	37706	1
12377	0	37475	0
37840	2	5601	1
31798	5	37911	0
37229	8	13853	1
36608	9	29426	0
37515	2	25199	1
21738	9	21738	0
37052	0	14639	1
6716	6	27855	0
37357	0	23693	1
28525	7	37786	0
37394	3	6493	1
12034	6	14588	0
37285	0	23621	1
26091	0	8652	0
38056	3	37817	1
25742	0	28045	0
37077	0	24684	1
4300	8	37875	0
37725	0	24045	1
288	8	2524	0
37779	4	21016	1
27855	8	37916	0
37779	5	6870	1
27497	4	26764	0
36828	6	20076	1
13875	3	4186	0
37731	1	16794	1
37582	6	37749	0
37399	0	22010	1
5244	3	29226	0
37399	5	19861	1
18680	0	11065	0
36520	0	16379	1
9690	1	2256	0
37770	0	24877	1
16659	9	11756	0
36712	0	37992	1
19707	9	18650	0
37465	0	37433	1
12064	3	26946	0
36942	3	37489	1
22047	2	32058	0
37955	2	17774	1
36118	7	26844	0
36524	8	38043	1
19545	6	25185	0
36524	5	37349	1
26764	2	21195	0
38091	2	17742	1
25934	9	36661	0
38091	2	10734	1
37912	9	10923	0
36485	2	19270	1
14685	2	1549	0
36485	2	12548	1
29755	9	31977	0
37737	0	33950	1
32331	5	10516	0
36705	3	2278	1
1344	8	36831	0
37842	2	17584	1
36708	6	36695	0
36604	3	7847	1
15689	4	14685	0
38016	1	20653	1
4609	0	23436	0
37446	2	9781	1
37677	1	12858	0
37446	2	7928	1
8768	8	22050	0
37852	0	10011	1
10579	8	3353	0
37331	3	37775	1
36869	1	19093	0
37331	6	36452	1
38145	7	38145	0
37331	6	31005	1
36684	7	22163	0
37331	6	16838	1
2964	2	16373	0
37457	0	4595	1
32186	0	36586	0
37653	0	8832	1
15438	9	36454	0
37339	0	9798	1
19707	1	7978	0
38096	2	15132	1
37528	10	38040	0
37123	0	19527	1
37532	0	23386	0
37821	3	37197	1
26511	10	10579	0
36738	3	24708	1
9604	0	37299	0
36436	5	822	1
25450	1	14745	0
36436	5	9243	1
28221	4	19358	0
36910	0	2060	1
4746	7	19052	0
36507	2	33677	1
31776	4	8900	0
37299	2	22064	1
36118	10	8314	0
37506	8	20695	1
38089	2	33649	0
37506	5	35081	1
28417	9	9690	0
37506	5	30481	1
16659	2	36574	0
37850	2	34198	1
2229	9	36445	0
37439	5	22268	1
7493	7	10118	0
37439	5	35784	1
12996	10	35847	0
37697	0	28440	1
13676	0	37911	0
36567	2	15695	1
4123	2	4123	0
37810	3	2928	1
36676	6	14696	0
37886	5	4977	1
19161	8	19161	0
38147	3	23547	1
29595	2	16373	0
37523	6	22072	1
25923	9	37900	0
36566	0	27507	1
16728	4	8545	0
36439	3	22422	1
19707	3	24325	0
36439	6	19880	1
32950	0	804	0
37358	0	13401	1
15368	7	12437	0
36522	3	24596	1
7706	1	29222	0
36522	6	27945	1
4000	4	16826	0
36522	6	2152	1
19707	5	10058	0
37509	6	37351	1
33664	8	33649	0
37509	6	34995	1
10910	9	16659	0
37423	0	36507	1
5404	7	35951	0
37631	3	2332	1
14611	3	18650	0
36677	2	37850	1
37299	2	4000	0
38071	2	24748	1
13779	10	5093	0
38071	2	36274	1
7211	1	8900	0
36693	6	19584	1
30197	9	6101	0
36693	6	15210	1
32872	3	36445	0
37367	0	21733	1
22914	6	7299	0
37367	2	18044	1
501	7	13779	0
37367	2	13064	1
10532	8	23436	0
36459	3	36493	1
22148	5	36717	0
37753	2	12354	1
7999	4	30294	0
37460	2	36632	1
18680	7	13675	0
36497	2	37763	1
33664	8	12034	0
38118	2	6846	1
6173	7	21365	0
36664	2	32703	1
20091	2	5821	0
37908	0	5664	1
37886	8	14342	0
37402	6	36056	1
2096	5	37915	0
37223	3	4313	1
4891	10	15689	0
37195	0	37083	1
25225	1	13390	0
37382	3	605	1
9755	1	9755	0
37665	6	28346	1
5244	8	10923	0
36476	4	36826	1
10933	0	4973	0
36889	4	22206	1
10579	2	25450	0
36809	2	15412	1
36981	2	2360	0
36809	2	13115	1
38040	5	31692	0
36743	5	32485	1
30552	5	15650	0
36444	2	11719	1
29595	3	16022	0
37410	0	26488	1
29579	3	298	0
37548	3	37563	1
3197	5	37742	0
36644	2	16221	1
19326	5	18776	0
36644	2	37444	1
6787	7	16471	0
36644	2	13750	1
5495	7	14437	0
37058	0	896	1
21789	8	22050	0
36707	0	732	1
16471	8	19358	0
36900	2	3852	1
19640	4	10313	0
37421	3	37388	1
14002	9	14499	0
37788	0	1474	1
11508	4	21122	0
37466	5	35237	1
33462	2	11756	0
37466	5	14136	1
25516	10	32717	0
37466	10	4360	1
2323	5	3306	0
38007	3	26596	1
29222	10	9690	0
37055	0	24789	1
20291	6	2360	0
37305	0	14639	1
7016	0	19640	0
36532	0	8462	1
633	2	4236	0
37664	0	19754	1
12283	8	12843	0
37913	4	22131	1
18311	4	2472	0
36864	0	37407	1
37601	5	28273	0
37440	0	24854	1
34481	2	37994	0
37440	5	20648	1
36972	3	29226	0
37498	0	13647	1
37994	6	25934	0
37498	0	36254	1
8966	8	25257	0
38019	6	26709	1
28956	5	37786	0
37750	6	35059	1
25596	4	9129	0
38048	2	10773	1
13190	7	9129	0
37999	2	36497	1
3063	6	1620	0
37999	2	23508	1
633	8	7875	0
37999	2	19004	1
11967	9	37915	0
37705	2	23076	1
7576	0	24556	0
37688	0	5293	1
36864	7	29152	0
37688	2	33765	1
32186	2	23386	0
37688	2	32159	1
31553	10	25882	0
37688	2	26545	1
15025	1	13190	0
37688	2	25965	1
30833	7	24829	0
37688	2	35977	1
37596	4	13162	0
37349	5	18363	1
37886	2	37482	0
37349	5	19446	1
7978	9	12724	0
37349	5	32192	1
9061	2	10747	0
37349	5	26238	1
17320	0	1149	0
37268	0	10574	1
13591	7	22370	0
37222	2	17016	1
20279	3	34772	0
37222	2	36420	1
31977	2	30144	0
37411	6	5690	1
22370	1	19918	0
36646	3	23728	1
6920	8	32905	0
36435	5	20508	1
6440	9	1009	0
37414	1	15712	1
1693	0	23386	0
37573	3	7730	1
18074	3	15368	0
36618	0	15335	1
2019	5	30552	0
37202	0	38036	1
36842	8	161	0
36433	0	23113	1
28176	5	31463	0
36433	9	15707	1
36942	4	32475	0
36433	9	14965	1
13043	10	6092	0
37275	0	24897	1
5444	8	29755	0
38045	5	18544	1
30144	6	17256	0
38045	5	37021	1
35093	7	12048	0
38045	5	8705	1
1715	8	35093	0
36861	2	10782	1
12724	0	25413	0
36861	2	16287	1
10747	1	20695	0
37916	0	17220	1
31904	6	18567	0
37712	6	17869	1
13875	10	29121	0
36649	2	17915	1
36940	2	37786	0
36716	5	22200	1
8314	4	25742	0
37773	2	15032	1
5093	2	37781	0
37210	4	18196	1
36661	9	37915	0
36826	5	2883	1
149	8	38104	0
36826	5	34705	1
5093	1	28370	0
36826	10	19007	1
37475	9	8033	0
36928	0	36903	1
10313	2	33462	0
37494	0	10626	1
14747	10	10933	0
36917	0	21376	1
14973	6	6169	0
36917	2	21988	1
20998	1	33042	0
36995	0	26132	1
20695	7	29341	0
36950	0	7858	1
31463	5	31380	0
37297	0	27656	1
386	9	37847	0
37707	3	23728	1
343	6	18311	0
36587	5	27014	1
24438	3	15689	0
37504	6	10555	1
13802	10	19918	0
38051	0	38017	1
37896	7	30294	0
38051	2	2983	1
9252	3	31989	0
37658	3	754	1
37382	8	7211	0
38103	0	28418	1
31904	9	27897	0
38103	2	2072	1
36708	6	37673	0
37352	0	27546	1
4000	8	26091	0
37510	3	36506	1
3987	7	22799	0
36726	1	36648	1
517	7	37911	0
38105	0	35344	1
7642	1	37488	0
38105	2	32356	1
37749	4	2256	0
37193	3	38149	1
25360	2	21789	0
37677	3	34466	1
24398	3	3987	0
36537	0	2371	1
7978	2	29579	0
37012	8	38135	1
24796	4	37781	0
36489	0	36024	1
1026	5	32872	0
36832	0	13830	1
37410	1	15476	0
36832	3	7730	1
3440	7	28221	0
37723	0	23731	1
36503	7	15921	0
37723	4	22777	1
20320	0	2800	0
36550	0	36531	1
8281	1	17690	0
36761	2	15969	1
18195	7	15802	0
37239	2	24197	1
17873	1	16513	0
37239	5	30000	1
5244	6	22914	0
37636	0	14228	1
6643	8	3131	0
37279	1	23431	1
22914	1	4319	0
37800	4	9976	1
14554	3	29122	0
37847	0	22328	1
386	1	15121	0
38107	0	37417	1
37152	3	1702	0
37217	2	4182	1
7978	1	26568	0
37976	0	8808	1
30375	0	38104	0
36923	4	25820	1
36855	0	21429	0
37959	0	791	1
20695	1	31380	0
36561	0	12847	1
33223	1	2256	0
37553	2	30011	1
24574	8	12034	0
36833	0	35231	1
18195	8	35951	0
37857	0	6454	1
5495	0	36584	0
37078	0	5329	1
6260	3	4171	0
37078	3	11893	1
36940	1	13948	0
37143	0	3636	1
14973	8	29426	0
37595	1	13127	1
5576	2	10773	0
37080	0	36497	1
37900	5	36469	0
36876	0	18521	1
8281	5	28273	0
37302	5	16105	1
4447	8	18266	0
37157	1	7205	1
21195	2	27912	0
37108	0	7214	1
32058	3	29588	0
37396	6	21392	1
17873	3	16513	0
36526	2	8265	1
33719	4	8966	0
36526	2	1087	1
21681	5	29426	0
37362	0	10484	1
9313	2	32905	0
38022	0	24834	1
16563	6	10578	0
36549	6	15215	1
14342	9	6122	0
38029	2	35252	1
11742	9	4372	0
37132	0	37347	1
10887	0	30833	0
37132	1	16794	1
38089	4	24249	0
36568	0	12760	1
4372	2	15022	0
37224	4	36552	1
6122	10	15980	0
37948	0	4251	1
8193	8	29198	0
37948	6	32706	1
16728	1	6141	0
36871	0	15826	1
27802	5	15986	0
36479	3	34007	1
3810	10	10578	0
38077	3	36929	1
6787	2	38065	0
38077	6	36493	1
12377	1	21160	0
38144	2	18398	1
37502	2	37596	0
38144	9	7584	1
37749	4	633	0
38144	9	8265	1
23632	10	28176	0
38144	9	8635	1
4447	1	30648	0
36667	2	14986	1
3439	7	686	0
36667	2	26724	1
36983	0	32872	0
38011	6	37428	1
37478	3	3987	0
38011	6	25693	1
15712	1	37513	0
36808	0	30635	1
29152	8	37866	0
37846	2	8320	1
27802	2	6141	0
37034	2	5749	1
25882	0	37732	0
36838	0	21578	1
36676	3	12000	0
36838	2	27803	1
30833	5	19722	0
36810	0	12847	1
1897	2	4382	0
37967	4	36780	1
24249	1	386	0
37536	0	37168	1
10578	10	37365	0
36652	2	28443	1
15980	4	4973	0
37088	1	23431	1
24530	0	16673	0
37220	8	25879	1
20484	8	37273	0
37360	0	36749	1
26534	3	27610	0
36603	0	16897	1
8033	9	31480	0
37134	5	32870	1
31904	5	10773	0
37134	5	13926	1
13874	1	22047	0
37134	5	10858	1
25516	8	36676	0
36692	0	27726	1
33054	5	33054	0
36692	3	27880	1
27186	4	9690	0
37093	2	36305	1
3439	4	14879	0
37769	8	32652	1
3987	1	1897	0
37769	4	36826	1
24530	4	22389	0
37447	0	19720	1
37502	1	5410	0
37447	2	28216	1
25060	1	31551	0
37447	2	34865	1
36764	9	27861	0
36591	4	33064	1
36676	10	20932	0
36998	4	16267	1
10747	7	13162	0
36998	9	36074	1
37916	3	14245	0
38109	2	28566	1
12858	8	3349	0
38116	5	3190	1
33027	8	8193	0
38116	5	9057	1
23693	9	23881	0
36768	0	14611	1
10579	5	15921	0
37000	1	16794	1
33223	1	37058	0
37765	2	32448	1
7400	3	18667	0
37734	2	5800	1
38049	4	10773	0
37526	3	37706	1
25582	8	6643	0
37485	0	37035	1
18414	0	20932	0
38017	2	38051	1
6260	8	23350	0
38006	2	19550	1
7875	7	30126	0
38006	2	32820	1
37749	8	21808	0
36624	6	32674	1
36861	0	16022	0
37589	0	18922	1
8314	4	18804	0
37377	3	37848	1
2807	1	13875	0
37844	8	25354	1
3877	8	27912	0
37659	4	7083	1
16450	1	19347	0
37905	0	15443	1
15980	3	2323	0
37158	8	21977	1
36661	0	20932	0
38132	2	13926	1
26526	4	2725	0
38133	9	18121	1
34599	7	2410	0
36585	6	8127	1
2069	10	37770	0
36658	3	11609	1
23843	2	16793	0
37792	0	3554	1
21789	10	29426	0
36758	6	29963	1
16513	6	4000	0
36770	2	33044	1
1549	7	15986	0
36786	3	36869	1
4891	9	14298	0
36534	0	32555	1
3450	9	24438	0
36990	3	26928	1
166	0	37152	0
36975	0	37936	1
37482	4	24398	0
36498	2	25230	1
29122	9	22799	0
38098	0	17292	1
38149	8	25413	0
36441	0	35770	1
6509	0	37528	0
37068	4	33818	1
27897	1	1149	0
37068	5	36994	1
38089	0	12034	0
37068	5	5670	1
38049	0	5576	0
37068	5	36523	1
6007	7	6007	0
37066	1	10068	1
37589	1	26486	0
38153	0	20685	1
16826	7	33453	0
36698	0	19527	1
26511	3	21426	0
37115	3	10863	1
11487	5	18650	0
37620	1	1590	1
21789	1	36861	0
37729	2	36518	1
12870	10	31480	0
36494	0	10309	1
11756	5	23210	0
37163	0	13830	1
31856	6	38128	0
36812	0	37083	1
34846	4	20135	0
37442	9	11718	1
1026	3	30306	0
37442	9	615	1
11742	8	11742	0
37698	3	6021	1
25606	4	2870	0
36819	5	7708	1
386	8	36879	0
37467	0	14874	1
14864	10	25923	0
37914	0	36024	1
11925	6	6545	0
36491	0	8588	1
37011	5	26922	0
37639	0	9557	1
2870	7	21426	0
37639	6	30608	1
31800	2	8768	0
37639	6	16023	1
37004	6	11141	0
36581	3	31537	1
18667	5	24581	0
36606	3	23214	1
27457	7	38118	0
37657	6	27726	1
37478	4	4095	0
37657	6	37848	1
19232	1	19918	0
36932	0	18455	1
32331	0	31144	0
36805	0	37802	1
23632	10	37410	0
36727	4	30693	1
1897	1	7211	0
37633	5	32915	1
23946	2	18414	0
36499	5	4748	1
23035	5	37050	0
38123	0	11068	1
16902	0	23693	0
37221	2	29605	1
20695	9	11756	0
36601	6	26924	1
10923	5	13874	0
37841	6	35326	1
10058	3	3770	0
37979	6	37543	1
346	2	37692	0
37794	5	36717	1
24796	1	37742	0
37391	0	23149	1
22050	8	11925	0
37036	0	30150	1
11782	8	30197	0
37818	0	9615	1
30375	8	25664	0
36831	0	1484	1
25257	4	22370	0
37298	4	14467	1
36620	9	37299	0
37298	4	31988	1
15870	8	31239	0
37610	0	14810	1
19307	5	7875	0
37610	3	29805	1
25436	3	7438	0
36668	6	26852	1
4000	0	16826	0
37044	6	37036	1
2947	2	9840	0
37375	0	36763	1
13263	7	29755	0
37225	0	21774	1
3450	7	13948	0
37225	2	23154	1
13802	1	10813	0
36622	0	37994	1
12764	9	37994	0
36622	2	17612	1
1009	8	17760	0
37623	2	12004	1
30144	7	8033	0
36784	2	27190	1
22066	3	12439	0
37514	0	21858	1
386	7	386	0
37209	0	16611	1
25882	5	7211	0
37807	0	19041	1
14298	8	517	0
37441	3	29805	1
14611	1	298	0
37320	3	21949	1
7576	4	17844	0
37320	2	27714	1
38118	5	1973	0
37320	2	19776	1
8296	6	19426	0
37320	2	32933	1
37106	0	19358	0
37320	2	3790	1
1344	9	7999	0
37320	2	33906	1
24278	3	20091	0
37373	0	19527	1
14437	1	37875	0
37373	6	25892	1
7642	7	20091	0
37580	2	35180	1
19407	10	25436	0
37484	3	30512	1
11508	6	25664	0
37484	6	721	1
31381	5	10134	0
37484	6	19156	1
37011	6	36708	0
37484	6	14138	1
25060	8	5660	0
37484	6	20474	1
11392	9	27800	0
37829	0	19542	1
5520	9	14780	0
37016	0	21235	1
37528	6	18053	0
38033	2	8872	1
2947	10	27640	0
37262	5	23911	1
12000	7	27656	0
36983	8	19794	1
14594	5	37900	0
37572	4	37572	1
7922	2	13162	0
36750	0	37704	1
21376	2	14647	0
36750	4	1202	1
30833	4	37555	0
36493	3	38077	1
36530	10	12034	0
36501	2	37773	1
12564	2	30294	0
38156	3	3787	1
16196	6	12858	0
37660	3	28746	1
30552	7	3306	0
38002	2	36275	1
37742	2	9129	0
37726	3	13142	1
33248	3	37873	0
38080	3	28421	1
20135	0	36608	0
38080	5	38080	1
3353	1	31553	0
36971	1	16794	1
27802	3	501	0
37086	0	13282	1
14496	4	17760	0
38120	3	18100	1
1297	1	36988	0
38120	2	26669	1
4447	10	15986	0
38113	2	15795	1
22370	7	33334	0
37795	6	8230	1
29755	6	23035	0
37772	3	14179	1
31560	0	23566	0
36925	3	20791	1
14685	3	16794	0
36925	6	32953	1
30294	9	29152	0
37893	2	5107	1
31144	0	29595	0
37893	2	2655	1
17256	6	21429	0
36615	2	10856	1
7999	4	29152	0
36615	2	15099	1
30197	4	971	0
38148	2	19518	1
23566	5	10578	0
38148	2	33803	1
36503	7	14696	0
36513	0	36774	1
25247	5	25257	0
37926	2	16639	1
11913	4	4177	0
37926	2	5492	1
33269	7	2870	0
37038	4	30581	1
38128	8	161	0
37341	4	37132	1
36118	2	37050	0
37067	3	29884	1
14499	0	36852	0
36607	2	30911	1
17873	5	2096	0
36746	3	1909	1
28273	9	8281	0
37428	5	21487	1
29595	4	15022	0
37798	6	35388	1
31239	3	19232	0
37849	8	2647	1
11648	10	37786	0
37849	5	10566	1
981	10	166	0
37749	0	17140	1
37814	3	15802	0
37749	1	15712	1
34035	7	36422	0
37920	3	10677	1
31551	3	5410	0
36842	2	28253	1
20235	6	288	0
37583	2	30383	1
4236	10	20998	0
37547	0	2509	1
15453	2	19307	0
36470	0	21245	1
7706	4	22163	0
36634	0	11068	1
26764	1	3349	0
38046	0	31462	1
23035	2	21195	0
38046	2	18409	1
5314	4	5314	0
37906	0	32677	1
15368	8	25432	0
37507	3	37706	1
22370	2	19326	0
38111	0	30693	1
10910	1	29341	0
36793	0	36498	1
14245	7	11648	0
37550	0	29491	1
37677	5	37406	0
37395	2	29233	1
15022	4	36988	0
37403	2	37627	1
16794	1	24796	0
38154	3	14149	1
23436	6	38145	0
37640	3	20397	1
37050	1	10933	0
36579	2	35580	1
36702	7	5576	0
36636	2	1979	1
14594	10	29528	0
36636	2	247	1
23339	8	15075	0
36636	2	33778	1
33453	5	16826	0
36636	2	37701	1
13434	3	30294	0
36636	2	21500	1
33637	2	4372	0
36636	2	8482	1
30294	7	8193	0
36636	2	2998	1
5495	7	19545	0
36636	2	34523	1
30387	2	4447	0
36636	2	5415	1
686	4	37498	0
37405	1	37621	1
3063	6	25432	0
38062	0	30698	1
31463	5	16118	0
37184	5	8935	1
19232	2	27855	0
37525	0	36024	1
5410	6	37038	0
37897	0	2392	1
4319	5	21738	0
36655	5	25470	1
12963	1	18471	0
38092	0	32555	1
27656	1	27656	0
38092	3	23728	1
31113	9	13043	0
37333	3	37372	1
37582	2	209	0
37333	2	20171	1
30507	5	9755	0
36799	3	4248	1
5244	1	27032	0
38000	2	1057	1
37866	7	27470	0
37931	4	31359	1
15169	6	298	0
36879	0	28844	1
3450	4	37781	0
36715	2	37774	1
932	10	26946	0
36697	0	37734	1
37532	9	36855	0
37882	4	2852	1
23946	9	932	0
37882	2	35695	1
37866	3	22370	0
37501	8	37383	1
19426	7	15986	0
37274	5	1467	1
15075	3	31239	0
37274	5	14628	1
30070	1	36608	0
37554	4	5419	1
13153	0	161	0
37324	0	37335	1
15921	3	6877	0
38030	3	11609	1
18266	4	21376	0
38030	6	7121	1
31760	4	18306	0
36471	0	27242	1
33334	5	20978	0
36471	2	17980	1
37797	5	36852	0
36471	2	37236	1
33248	9	24829	0
37746	6	27984	1
26281	0	11863	0
37746	6	28250	1
15022	0	36988	0
37746	6	11720	1
19232	7	2524	0
37925	0	36325	1
38065	8	11392	0
37470	3	5074	1
15252	7	21083	0
37470	2	9324	1
37379	2	15689	0
36663	4	263	1
35951	3	29760	0
36753	6	31296	1
27470	1	14973	0
37727	2	20940	1
26568	2	14611	0
37727	2	16166	1
10134	10	14342	0
37752	2	3746	1
2556	3	8296	0
37273	3	37435	1
25484	2	25300	0
37273	6	17110	1
9635	0	23441	0
36862	0	24877	1
22370	9	36988	0
36862	3	37028	1
34543	2	36477	0
37561	0	35756	1
11790	3	18076	0
37056	8	36131	1
36764	3	21122	0
37056	8	9093	1
9252	4	14437	0
36806	0	27068	1
26534	1	17844	0
36806	2	20338	1
5404	8	10578	0
37126	3	31912	1
20800	2	8900	0
36648	9	5106	1
23436	8	6509	0
36648	9	5337	1
12861	3	12861	0
36648	9	4998	1
9755	10	17256	0
36648	9	9710	1
5444	4	36586	0
36648	9	7589	1
10813	10	37786	0
36648	9	18576	1
35361	4	25934	0
36648	9	29747	1
24530	0	30144	0
36648	9	7804	1
27897	7	13874	0
36648	9	7316	1
27186	10	633	0
36648	9	14445	1
23210	2	2388	0
36648	9	21511	1
23339	5	2556	0
36648	9	29711	1
37986	9	35093	0
36648	9	503	1
38149	10	2883	0
36648	9	23812	1
35972	7	6440	0
36648	9	29237	1
8336	3	31113	0
36648	9	38027	1
15472	4	23441	0
36648	9	36472	1
12034	9	24325	0
36648	9	4558	1
16826	3	13731	0
36648	9	8233	1
31239	3	9313	0
36648	9	22755	1
21808	6	30375	0
36648	9	36726	1
19814	10	4177	0
36648	9	12418	1
13874	0	17082	0
36648	9	24148	1
27897	6	36869	0
36648	9	26493	1
36471	9	28568	0
36648	9	811	1
14499	0	37886	0
36648	9	17232	1
13731	3	25606	0
36648	9	4239	1
15438	8	36972	0
36648	9	10008	1
37900	1	37011	0
37317	0	3113	1
14879	5	6877	0
37251	5	21966	1
4319	3	7299	0
37251	5	3395	1
2964	10	21681	0
37752	2	32698	1
31463	8	3440	0
38082	0	10734	1
19052	2	5093	0
36874	0	22118	1
22799	0	38137	0
36874	4	35725	1
37411	6	32876	0
37834	0	25507	1
16659	8	25432	0
36756	0	31241	1
7211	9	32950	0
36660	2	37587	1
37908	7	29755	0
37592	0	12901	1
25225	5	37411	0
38004	3	6705	1
24747	3	8034	0
36800	6	11398	1
12000	9	11967	0
36432	0	36205	1
22389	0	4656	0
36744	0	38107	1
19490	2	14594	0
37070	4	24009	1
25572	3	18009	0
37070	2	36940	1
15712	1	12158	0
37596	8	38048	1
26526	6	7816	0
37596	4	15236	1
7493	0	21426	0
37885	0	9603	1
9457	2	2800	0
37885	6	36597	1
36983	2	36983	0
36926	0	17722	1
7816	10	2964	0
38122	0	24740	1
3450	2	37916	0
36736	2	30920	1
5520	8	33719	0
36505	0	32478	1
6173	9	18471	0
36505	3	37388	1
25606	7	33269	0
37560	2	14713	1
37814	6	36471	0
37560	2	11977	1
19707	5	34590	0
37529	2	37590	1
31113	5	33054	0
37529	2	30958	1
24087	2	7576	0
37443	1	35124	1
29659	9	6643	0
37045	3	36487	1
22389	8	37908	0
37045	6	1188	1
6260	4	21365	0
38068	0	11340	1
6101	0	19161	0
38068	3	29025	1
16450	5	36842	0
38081	0	13853	1
31560	7	2947	0
38081	5	37530	1
34928	9	12443	0
37029	0	31112	1
15476	2	8480	0
37029	3	37024	1
8041	7	5314	0
37743	4	3672	1
1027	2	36695	0
37896	0	19527	1
4236	1	36764	0
37896	6	4354	1
23386	1	38149	0
36868	0	5614	1
37749	6	7400	0
36563	5	38009	1
37786	9	23339	0
36517	4	27950	1
26764	10	30833	0
37870	0	29157	1
1702	0	20279	0
[truncated: 2,862 more rows]
