# Supplementary material
Source: ML conference proceedings conference paper supplement (https://proceedings.neurips.cc/paper_files/paper/2021/hash/0fd600c953cde8121262e322ef09f70e-Abstract.html)
Supplement: Supplementary file 1 [file 0fd600c953cde8121262e322ef09f70e-Supplemental.zip › Supplementary_Material_Paper_8745/data/Hamaguchi-BM_head-5000/test/test-random-sample/test8.txt]

38038	0	13590	1
37886	10	14342	0
37961	2	21629	1
17320	7	14609	0
37786	2	21674	1
5324	0	5324	0
37125	0	9144	1
298	2	12034	0
37706	6	33781	1
13875	9	7922	0
37706	6	4066	1
5191	7	36702	0
37706	2	2163	1
31480	5	1512	0
37706	6	34609	1
31553	0	12000	0
37706	6	16086	1
18834	4	37080	0
37706	6	3596	1
5404	9	22914	0
37706	6	33602	1
5096	2	1715	0
37706	6	30633	1
36581	5	31293	0
37706	6	31350	1
15650	2	14499	0
37732	8	21977	1
5526	3	26937	0
36920	0	18455	1
12724	10	16673	0
36920	6	30072	1
30126	7	15453	0
37431	0	21858	1
37004	8	8034	0
37431	3	5512	1
7978	0	298	0
36503	9	19295	1
12861	1	17760	0
36452	6	23095	1
13190	0	33334	0
37256	6	32897	1
1027	0	21002	0
37175	0	1494	1
2256	1	633	0
37995	0	38058	1
21195	3	3987	0
37995	2	19334	1
21738	9	5191	0
36617	5	36348	1
6440	4	21739	0
36617	5	37969	1
25225	5	19707	0
36617	5	3479	1
6173	2	37488	0
36617	5	37281	1
14714	0	5096	0
37683	4	8226	1
2104	6	1620	0
37740	1	27492	1
7816	8	36477	0
36559	4	3873	1
31798	7	11863	0
37452	3	37746	1
3639	1	11790	0
37490	0	38106	1
27855	3	19232	0
36883	2	5309	1
8033	4	34928	0
36760	2	28698	1
14973	3	4811	0
36760	2	15844	1
7875	7	209	0
37527	1	38144	1
11913	5	6716	0
37408	0	22280	1
3810	0	1149	0
37408	2	19626	1
12034	6	37050	0
37408	2	23911	1
36445	0	3254	0
37718	0	11318	1
26864	1	27610	0
37487	5	10055	1
8527	2	7875	0
37412	4	34985	1
10933	8	11782	0
37820	1	2195	1
20998	1	19814	0
36614	3	13925	1
19358	5	32872	0
38095	9	20539	1
5932	3	20291	0
38095	9	20083	1
20932	4	932	0
37676	0	12847	1
36530	3	10933	0
36552	5	7602	1
8034	6	16373	0
36552	5	6623	1
26864	6	37781	0
37351	0	23693	1
7816	7	14973	0
37351	3	37509	1
18009	8	27912	0
37351	6	20995	1
19640	7	30306	0
36795	1	6886	1
36530	0	12443	0
36690	0	36504	1
9449	2	18834	0
38078	6	4844	1
7999	4	22050	0
36495	2	10254	1
7987	0	13874	0
36495	2	37611	1
26922	0	6260	0
36495	2	38140	1
12775	0	13153	0
36495	2	12686	1
6877	3	20291	0
36495	2	4171	1
16563	2	4891	0
36495	2	30916	1
14604	1	31239	0
36495	2	11884	1
19531	1	2069	0
37996	0	32555	1
38104	9	24278	0
37663	1	26796	1
7875	9	33498	0
37475	2	20536	1
29044	9	17320	0
36632	2	27167	1
38040	7	14298	0
37144	3	1033	1
501	8	2556	0
37099	6	13451	1
38128	4	16793	0
37099	6	37402	1
15034	9	16878	0
37099	6	7680	1
13390	9	30144	0
37099	6	7730	1
14516	9	36539	0
37099	6	26613	1
14437	9	30387	0
37868	0	11719	1
5495	2	13591	0
37278	0	26360	1
33054	6	7016	0
36966	2	36580	1
24556	1	15986	0
37899	3	4039	1
37038	1	2229	0
37458	0	38036	1
31551	8	23632	0
36678	6	36965	1
14973	10	25257	0
38042	2	29551	1
14154	6	36972	0
36817	2	34279	1
36574	0	25432	0
36817	2	11428	1
37382	1	14499	0
36817	2	32167	1
24829	10	19161	0
36817	2	27904	1
33053	3	22631	0
36817	2	36780	1
13676	1	29044	0
37424	2	10914	1
13731	3	6643	0
38142	2	16206	1
36632	5	37382	0
37962	0	1494	1
7211	10	20932	0
36898	3	7692	1
37786	5	3197	0
37469	3	37715	1
29122	4	6101	0
37340	0	37465	1
2947	9	23436	0
37187	2	24954	1
18941	5	18941	0
36869	3	27796	1
166	9	7507	0
36869	6	15409	1
36454	8	31560	0
36869	6	31981	1
30070	1	36477	0
36869	6	13404	1
8033	4	12724	0
36869	6	16754	1
35640	5	37555	0
36869	6	23520	1
7576	5	37875	0
36869	6	26232	1
3987	3	16902	0
36869	6	16304	1
13802	2	27255	0
36869	6	32400	1
35361	7	26946	0
36869	6	19036	1
2256	7	9690	0
36869	6	258	1
26750	10	8034	0
37877	0	10011	1
21564	7	12996	0
36804	2	18529	1
6141	1	25484	0
36555	0	19527	1
36879	3	18650	0
36731	0	36325	1
11487	0	34928	0
36731	3	27635	1
9486	9	1512	0
36610	0	37417	1
37004	9	12564	0
37164	0	11068	1
1297	6	8193	0
38024	6	5783	1
3770	3	34369	0
36930	4	36617	1
13591	10	1549	0
36887	5	11430	1
36983	9	21897	0
36887	9	13402	1
8454	6	24325	0
36792	2	23735	1
32872	8	37513	0
36792	2	16473	1
14745	8	34599	0
36696	3	11628	1
2472	8	29226	0
37721	0	18977	1
4609	1	9794	0
37721	1	25201	1
10141	2	2741	0
36734	2	7578	1
36831	0	22050	0
38013	5	25160	1
29152	2	11742	0
36984	4	22206	1
2532	10	10029	0
36823	2	21925	1
18053	9	7299	0
36675	6	35645	1
29760	1	10923	0
36675	6	24081	1
11392	6	37531	0
37182	4	18196	1
27855	10	2465	0
37314	0	14810	1
6092	10	37806	0
37939	1	5235	1
9129	2	19545	0
37571	3	37755	1
21613	3	36702	0
37084	0	4944	1
26091	4	11967	0
36757	0	36711	1
37886	7	27912	0
37520	0	28714	1
34369	2	25413	0
36639	4	1401	1
37749	0	7875	0
36993	6	19453	1
34590	3	386	0
38066	3	34899	1
4447	8	2556	0
37148	0	25641	1
37382	0	26764	0
37374	0	37899	1
13948	5	26486	0
38005	8	29602	1
8454	4	5444	0
38005	1	10068	1
12439	4	26864	0
37345	0	12847	1
12443	6	24325	0
37345	3	34059	1
29226	5	37379	0
37936	2	20271	1
23102	10	26212	0
37936	2	5195	1
4811	3	16793	0
36515	0	1898	1
7162	7	1027	0
38130	2	25805	1
33334	5	28956	0
37598	0	3113	1
18680	10	38137	0
37145	8	37383	1
4171	10	29528	0
37609	4	23903	1
7530	6	9479	0
37109	0	31363	1
37749	6	32872	0
37429	2	37187	1
23946	9	8336	0
36924	0	14810	1
10773	6	2472	0
37059	0	28682	1
10578	10	31798	0
38065	8	20695	1
14496	4	23210	0
38065	5	18780	1
30197	0	18804	0
38065	5	35081	1
36608	0	30070	0
37667	2	26005	1
6980	4	8458	0
37190	2	5549	1
8652	6	3353	0
37190	2	18069	1
31800	1	21599	0
37748	0	2060	1
36869	5	31560	0
37748	6	36331	1
24306	7	19052	0
37634	2	9024	1
14499	9	971	0
37655	6	31042	1
37582	3	36666	0
37371	4	37371	1
12775	0	25257	0
36635	6	29654	1
21662	10	25596	0
37241	4	28335	1
35951	10	36471	0
36904	0	37497	1
19707	0	37050	0
36794	0	26288	1
1697	0	15493	0
36711	2	31747	1
14554	1	1897	0
36711	2	27355	1
15034	5	30126	0
36502	0	31636	1
8480	0	10747	0
37530	4	38081	1
2947	10	15802	0
38055	3	10755	1
31553	5	8336	0
36963	1	37784	1
36608	4	35921	0
36612	2	1646	1
21897	7	18091	0
36612	2	37230	1
20484	1	24574	0
36612	2	13556	1
12034	0	31977	0
37155	9	37919	1
10118	8	20279	0
37537	2	6960	1
25606	5	3353	0
37591	1	29429	1
1094	1	4891	0
36752	4	19859	1
29222	8	7400	0
36684	9	8113	1
31560	7	1094	0
36684	9	13617	1
36477	6	6169	0
36684	9	37125	1
31113	10	804	0
37418	5	14347	1
6877	0	16826	0
36474	3	5808	1
15252	1	35459	0
37385	5	31953	1
29760	1	9840	0
37385	5	10127	1
29528	6	18667	0
36699	6	21744	1
21564	6	6092	0
37544	5	7397	1
13874	0	4609	0
36424	2	31979	1
1702	5	37898	0
36575	9	3604	1
31463	0	5410	0
36575	9	22163	1
33246	2	37749	0
37888	3	37564	1
4449	9	11576	0
37265	0	24740	1
13153	10	36477	0
38119	0	28996	1
36516	7	18195	0
36840	5	23132	1
29760	6	21036	0
38031	4	36669	1
30294	5	36988	0
38031	5	20495	1
37011	10	6930	0
37535	8	21769	1
16747	7	25572	0
37315	5	12259	1
288	1	2556	0
36590	0	12847	1
12564	0	29426	0
37579	0	12847	1
1297	4	36988	0
37567	0	23375	1
633	8	21002	0
36530	2	22057	1
37066	5	11756	0
37669	3	38025	1
3897	3	28525	0
37115	4	33818	1
31381	10	31760	0
37115	3	30954	1
4966	9	1861	0
37115	5	30981	1
24325	1	386	0
37115	5	7828	1
37908	3	36530	0
37301	0	6454	1
36764	6	29528	0
38128	0	9557	1
14746	5	30734	0
36616	6	29740	1
8336	2	21564	0
36442	4	25951	1
3439	9	20279	0
37387	0	32217	1
5244	4	19117	0
36953	0	2809	1
5199	7	8038	0
38067	0	13873	1
36581	8	16174	0
36997	2	7519	1
37317	0	37488	0
37958	2	37192	1
8336	7	37986	0
37958	2	13549	1
14746	4	36684	0
37974	0	21858	1
1973	4	18650	0
36991	6	37836	1
6509	4	8281	0
36912	4	27211	1
3439	9	14745	0
36912	6	17868	1
23881	10	37873	0
36450	3	37436	1
37528	1	37379	0
36450	2	18945	1
18306	2	34897	0
36450	9	3352	1
3440	0	10910	0
36777	2	31569	1
25300	1	19052	0
37089	3	10978	1
33719	3	6169	0
37695	2	21408	1
386	0	30144	0
37695	2	11401	1
15476	9	6787	0
38135	2	16236	1
8458	6	6787	0
37167	9	3742	1
8119	10	18266	0
36475	0	5117	1
14499	10	9107	0
37871	6	7605	1
8281	9	37528	0
36872	0	3303	1
19081	8	31606	0
36872	2	25476	1
5699	10	17256	0
36872	2	16656	1
18834	6	14714	0
36872	2	32635	1
21599	10	8034	0
37756	0	21858	1
36620	5	38040	0
37334	0	27546	1
30825	6	4123	0
37334	2	13584	1
28176	1	31113	0
37168	2	30788	1
36558	10	29760	0
38037	0	35856	1
14696	3	14879	0
37293	0	21858	1
1009	7	17760	0
36569	0	18455	1
21365	8	19814	0
37049	8	36531	1
8041	1	105	0
37832	0	38036	1
33462	10	28221	0
37832	3	7911	1
37781	10	13779	0
37815	1	14804	1
2019	9	37797	0
37937	2	4213	1
10773	6	5495	0
37937	2	21081	1
2465	8	28370	0
37383	2	38053	1
1973	1	21509	0
37383	2	25052	1
10505	8	22816	0
37383	2	18446	1
31301	3	1512	0
37383	2	2374	1
38137	4	21195	0
37383	2	37145	1
6173	6	3857	0
37383	2	22065	1
7211	7	11782	0
37383	2	29784	1
6643	9	33269	0
37383	2	6599	1
18091	10	2741	0
37383	2	24671	1
37749	4	21002	0
37383	2	19598	1
3857	10	25923	0
37383	2	32975	1
33649	8	15025	0
37383	2	25449	1
29222	7	30375	0
37383	2	6489	1
34543	3	161	0
37383	2	14752	1
19676	6	161	0
37383	2	12417	1
25484	4	8545	0
37383	2	33492	1
15476	6	19358	0
37383	2	6496	1
31606	3	29122	0
36789	0	21858	1
37299	3	28568	0
36672	0	36497	1
34772	4	10118	0
37199	4	33177	1
31113	9	9061	0
37284	0	21858	1
18650	3	15169	0
37284	6	2338	1
28417	2	37058	0
37284	6	1572	1
5867	4	36879	0
36487	6	4134	1
37365	0	17320	0
36487	6	23862	1
22914	0	4319	0
36487	6	12437	1
3347	6	14002	0
36490	0	2293	1
37060	1	16826	0
36642	2	31835	1
21599	0	37004	0
36642	2	12698	1
1693	8	21509	0
36642	2	7713	1
34599	4	37806	0
37710	2	23707	1
31130	3	28956	0
37649	2	1408	1
3197	10	37742	0
37716	2	32210	1
31463	1	7168	0
37028	6	36862	1
5867	9	36920	0
37267	3	20389	1
14745	4	11967	0
36824	0	26857	1
36684	4	7706	0
37473	5	20325	1
31692	10	29226	0
36589	8	16346	1
30552	9	9107	0
37291	3	25051	1
37732	6	26091	0
38104	2	33517	1
36469	6	37749	0
37356	1	34276	1
15986	10	13802	0
37831	4	29789	1
25431	6	28221	0
37831	2	17546	1
4000	10	12843	0
37831	2	17077	1
13874	2	29044	0
37831	5	8492	1
2360	7	14696	0
37831	5	23346	1
27855	2	22370	0
36841	3	6986	1
3877	1	15169	0
36454	6	26412	1
28956	9	14647	0
37248	6	14442	1
9604	4	29588	0
37608	0	31363	1
3440	8	37513	0
37608	2	24337	1
27855	4	21376	0
36512	3	38011	1
30070	0	1344	0
36718	0	8666	1
149	4	36666	0
37854	4	14826	1
36684	3	21122	0
37407	0	31462	1
36915	9	19484	0
37454	0	9258	1
18306	4	5324	0
36725	0	30255	1
33317	1	9107	0
36480	1	28032	1
34481	8	37806	0
37464	0	13800	1
16022	10	6169	0
37874	8	37467	1
8296	10	4746	0
38040	2	16310	1
5096	8	12611	0
37855	0	19436	1
10923	3	14298	0
36927	0	19527	1
3820	5	8193	0
36927	6	33317	1
36445	5	36942	0
36927	6	9914	1
17320	2	36620	0
37261	6	36512	1
37797	9	36632	0
37296	0	26005	1
218	4	36463	0
37942	2	21013	1
25616	3	36581	0
37826	2	37826	1
16373	10	12775	0
36488	0	38153	1
36920	7	23386	0
37476	0	15004	1
20484	4	18650	0
37586	4	6983	1
11576	5	9479	0
36958	6	7661	1
17690	9	16563	0
36958	6	31351	1
3810	9	5124	0
36640	0	9603	1
22799	1	25742	0
38114	2	27613	1
37898	8	932	0
37014	2	16709	1
24815	3	3877	0
37448	0	24660	1
20800	7	23693	0
37448	2	11605	1
8314	0	9107	0
37286	6	20731	1
31582	6	33248	0
36533	2	12549	1
37379	0	2947	0
36533	2	36780	1
35847	0	14879	0
36533	2	35853	1
17017	5	36940	0
36533	2	29649	1
21897	9	13139	0
36533	5	18564	1
25582	1	35847	0
36533	2	16852	1
11392	7	13162	0
36775	0	19759	1
26511	8	15921	0
37761	2	10467	1
25257	0	1861	0
37761	2	1942	1
1697	3	33053	0
37069	0	14810	1
10313	1	8480	0
37680	6	28437	1
24796	9	23339	0
37680	6	26317	1
161	2	33637	0
37680	6	21817	1
7987	1	35951	0
37680	6	34667	1
24249	7	10058	0
37282	5	12083	1
19426	5	13802	0
36483	6	12661	1
8545	4	4300	0
37546	4	7918	1
28417	6	4440	0
36853	0	19720	1
14611	1	18650	0
36785	3	31130	1
13390	5	1693	0
36637	4	1404	1
20279	10	7507	0
37353	0	9612	1
15921	0	36503	0
37497	0	19088	1
23632	7	5410	0
37083	2	19321	1
25582	7	29659	0
37083	2	29085	1
22278	4	735	0
37083	2	7377	1
31463	8	30306	0
37083	2	36828	1
3439	8	18941	0
37083	2	33120	1
19117	3	9840	0
37083	2	37711	1
3770	1	2069	0
37083	2	36604	1
10505	7	3083	0
37083	2	3590	1
27186	3	23700	0
37083	2	35764	1
5699	7	24574	0
37083	2	10551	1
28417	10	20320	0
37952	0	15223	1
36717	8	24325	0
36729	2	1487	1
9486	9	3063	0
37768	3	16206	1
33246	6	13875	0
36835	9	3283	1
161	5	2964	0
36835	9	16521	1
12564	0	11925	0
37797	5	2682	1
31760	2	9107	0
36778	2	24444	1
11967	8	7493	0
36781	2	1748	1
22670	3	288	0
36781	2	19085	1
32717	3	32717	0
36781	2	38006	1
36702	8	15802	0
37023	0	24574	1
6492	10	2807	0
37453	8	36636	1
25413	10	10933	0
36992	3	1501	1
37273	6	19531	0
37593	0	19527	1
12843	5	35361	0
36446	2	15149	1
36988	7	7275	0
36611	2	14715	1
11967	1	12064	0
37260	2	10361	1
1620	8	20695	0
36700	3	23728	1
21824	1	29226	0
36686	6	19073	1
37406	9	27497	0
37434	2	31751	1
15252	5	18074	0
37434	2	2411	1
3770	1	34369	0
38085	0	32555	1
29659	0	33453	0
36825	2	5616	1
288	1	11648	0
36825	2	28871	1
7016	6	5660	0
37019	8	32652	1
25300	7	15986	0
37019	5	4979	1
4447	10	14685	0
38072	0	23807	1
19676	7	14780	0
36574	0	10011	1
19426	0	25596	0
36574	3	37935	1
3349	5	28045	0
36597	6	12370	1
6980	9	14496	0
36597	6	26336	1
10933	9	14002	0
37576	0	2060	1
7706	6	149	0
37576	3	30610	1
25300	0	26864	0
37004	2	10041	1
15472	0	24325	0
36989	4	36617	1
6643	10	7211	0
36989	5	36982	1
21789	1	6007	0
36989	5	36938	1
34772	2	6643	0
38015	4	16534	1
37589	7	31910	0
36791	5	574	1
36981	3	35492	0
37549	4	32349	1
14496	9	10313	0
37549	5	14330	1
2069	6	34083	0
36546	5	37199	1
27173	0	33649	0
37122	2	28506	1
26946	4	6092	0
36852	2	33650	1
24530	1	18650	0
37438	2	28903	1
6930	10	21122	0
37587	0	36660	1
37912	0	21824	0
36671	0	37216	1
12775	6	8768	0
36977	3	37261	1
16450	5	16793	0
36977	10	27084	1
30507	8	26568	0
36977	5	26202	1
14245	0	19918	0
37057	0	36577	1
32905	4	20235	0
38137	0	14810	1
517	0	7299	0
36737	4	16515	1
12561	9	37513	0
38039	4	5702	1
29141	0	3254	0
37397	0	22429	1
35514	9	7816	0
37312	5	15207	1
37532	7	36920	0
37835	3	3641	1
19052	5	1202	0
37040	5	1716	1
38128	10	19347	0
36899	3	37706	1
35586	9	36558	0
37840	2	5601	1
19676	6	7999	0
37229	8	13853	1
37482	9	37677	0
37515	2	25199	1
25664	7	5069	0
37052	0	14639	1
33223	8	21808	0
37357	0	23693	1
28568	0	8623	0
37394	3	6493	1
36940	3	13190	0
37285	0	23621	1
33317	7	13675	0
38056	3	37817	1
19484	4	37747	0
37077	0	24684	1
15493	3	15493	0
37725	0	24045	1
844	0	24530	0
37779	4	21016	1
16793	0	25257	0
37779	5	6870	1
31553	7	26946	0
36828	6	20076	1
5324	4	25572	0
37731	1	16794	1
25934	10	13043	0
37399	0	22010	1
29122	3	18680	0
37399	5	19861	1
37488	8	37317	0
36520	0	16379	1
6643	10	20088	0
37770	0	24877	1
3306	9	37478	0
36712	0	37992	1
12963	0	4236	0
37465	0	37433	1
27497	8	4095	0
36942	3	37489	1
37994	2	29659	0
37955	2	17774	1
20091	10	33498	0
36524	8	38043	1
35093	8	25882	0
36524	5	37349	1
7554	6	12443	0
38091	2	17742	1
34974	4	25360	0
38091	2	10734	1
13215	6	13591	0
36485	2	19270	1
1711	8	25921	0
36485	2	12548	1
22984	5	32695	0
37737	0	33950	1
29579	8	2069	0
36705	3	2278	1
22984	1	36716	0
37842	2	17584	1
15368	4	15368	0
36604	3	7847	1
36855	2	13263	0
38016	1	20653	1
4382	2	6122	0
37446	2	9781	1
27497	3	22799	0
37446	2	7928	1
15438	4	37379	0
37852	0	10011	1
30070	4	4372	0
37331	3	37775	1
24249	8	9755	0
37331	6	36452	1
16471	1	37513	0
37331	6	31005	1
32905	4	16794	0
37331	6	16838	1
26946	0	15788	0
37457	0	4595	1
22389	2	3877	0
37653	0	8832	1
14604	2	19232	0
37339	0	9798	1
24829	0	14554	0
38096	2	15132	1
31381	9	25572	0
37123	0	19527	1
15328	9	28352	0
37821	3	37197	1
37038	4	31463	0
36738	3	24708	1
4440	2	27861	0
36436	5	822	1
6169	5	7275	0
36436	5	9243	1
36471	4	37912	0
36910	0	2060	1
6169	5	16022	0
36507	2	33677	1
35640	10	15650	0
37299	2	22064	1
6643	1	13043	0
37506	8	20695	1
13358	8	14516	0
37506	5	35081	1
10813	1	13948	0
37506	5	30481	1
25185	1	24578	0
37850	2	34198	1
7168	3	19358	0
37439	5	22268	1
932	1	37898	0
37439	5	35784	1
37488	10	37357	0
37697	0	28440	1
16450	7	29152	0
36567	2	15695	1
4095	10	37677	0
37810	3	2928	1
1009	1	5410	0
37886	5	4977	1
3254	6	887	0
38147	3	23547	1
12437	0	1026	0
37523	6	22072	1
26844	8	4095	0
36566	0	27507	1
343	10	5191	0
36439	3	22422	1
16174	8	35258	0
36439	6	19880	1
36218	4	31582	0
37358	0	13401	1
30387	10	6716	0
36522	3	24596	1
31034	8	3857	0
36522	6	27945	1
29760	5	3339	0
36522	6	2152	1
6128	8	1697	0
37509	6	37351	1
24747	9	19676	0
37509	6	34995	1
37152	3	13043	0
37423	0	36507	1
4186	0	10747	0
37631	3	2332	1
13875	6	31480	0
36677	2	37850	1
18311	7	5124	0
38071	2	24748	1
31800	9	35514	0
38071	2	36274	1
37786	6	15689	0
36693	6	19584	1
1620	0	2104	0
36693	6	15210	1
23350	3	6716	0
37367	0	21733	1
18764	7	9377	0
37367	2	18044	1
32331	9	29152	0
37367	2	13064	1
2625	8	386	0
36459	3	36493	1
25606	5	25582	0
37753	2	12354	1
33317	0	10887	0
37460	2	36632	1
13215	8	4447	0
36497	2	37763	1
21122	1	37900	0
38118	2	6846	1
12861	1	8336	0
36664	2	32703	1
17690	8	28273	0
37908	0	5664	1
7576	9	13802	0
37402	6	36056	1
36552	1	27470	0
37223	3	4313	1
27800	8	32475	0
37195	0	37083	1
5520	10	8768	0
37382	3	605	1
21599	3	10920	0
37665	6	28346	1
35081	5	36539	0
36476	4	36826	1
16537	3	36539	0
36889	4	22206	1
37692	10	31692	0
36809	2	15412	1
13485	2	32331	0
36809	2	13115	1
27664	8	15368	0
36743	5	32485	1
22631	5	22631	0
36444	2	11719	1
18091	9	22670	0
37410	0	26488	1
16794	10	3197	0
37548	3	37563	1
35081	1	6128	0
36644	2	16221	1
36666	8	37357	0
36644	2	37444	1
31760	9	31606	0
36644	2	13750	1
36869	1	8623	0
37058	0	896	1
7576	4	8545	0
36707	0	732	1
4236	10	21002	0
36900	2	3852	1
5699	7	844	0
37421	3	37388	1
13190	4	30648	0
37788	0	1474	1
30197	4	3347	0
37466	5	35237	1
20695	1	31113	0
37466	5	14136	1
37382	4	24829	0
37466	10	4360	1
6092	9	35361	0
38007	3	26596	1
15832	5	4382	0
37055	0	24789	1
24087	6	3897	0
37305	0	14639	1
36503	2	166	0
36532	0	8462	1
37673	8	18076	0
37664	0	19754	1
14499	0	35640	0
37913	4	22131	1
36503	7	15788	0
36864	0	37407	1
7493	1	16826	0
37440	0	24854	1
33479	3	37651	0
37440	5	20648	1
932	8	20088	0
37498	0	13647	1
37498	6	37446	0
37498	0	36254	1
5404	6	37814	0
38019	6	26709	1
37482	5	37478	0
37750	6	35059	1
166	2	932	0
38048	2	10773	1
36588	7	35492	0
37999	2	36497	1
37900	0	19490	0
37999	2	23508	1
4372	5	30070	0
37999	2	19004	1
20091	9	18667	0
37705	2	23076	1
35921	5	31800	0
37688	0	5293	1
37732	2	33848	0
37688	2	33765	1
22050	8	1861	0
37688	2	32159	1
22631	4	3083	0
37688	2	26545	1
14696	10	12843	0
37688	2	25965	1
15476	2	37197	0
37688	2	35977	1
13874	6	14154	0
37349	5	18363	1
37749	10	23632	0
37349	5	19446	1
13675	2	34730	0
37349	5	32192	1
11487	0	27173	0
37349	5	26238	1
16388	1	25882	0
37268	0	10574	1
15514	1	29341	0
37222	2	17016	1
9690	10	4440	0
37222	2	36420	1
19326	7	30070	0
37411	6	5690	1
288	2	19232	0
36646	3	23728	1
8527	4	4171	0
36435	5	20508	1
18650	0	22481	0
37414	1	15712	1
14002	8	12858	0
37573	3	7730	1
343	9	18053	0
36618	0	15335	1
686	1	31553	0
37202	0	38036	1
38137	10	9107	0
36433	0	23113	1
37446	5	15788	0
36433	9	15707	1
9037	4	8034	0
36433	9	14965	1
19161	0	28045	0
37275	0	24897	1
2256	7	8527	0
38045	5	18544	1
14554	8	19081	0
38045	5	37021	1
18306	7	22799	0
38045	5	8705	1
4656	2	37411	0
36861	2	10782	1
36983	0	22816	0
36861	2	16287	1
38128	3	3385	0
37916	0	17220	1
3778	6	166	0
37712	6	17869	1
31380	2	30306	0
36649	2	17915	1
5526	4	19814	0
36716	5	22200	1
35847	6	36676	0
37773	2	15032	1
18306	5	37478	0
37210	4	18196	1
35586	2	14714	0
36826	5	2883	1
37080	7	9479	0
36826	5	34705	1
19426	3	20235	0
36826	10	19007	1
35586	3	37961	0
36928	0	36903	1
4025	10	4382	0
37494	0	10626	1
38128	3	27470	0
36917	0	21376	1
8545	2	31910	0
36917	2	21988	1
166	7	37060	0
36995	0	26132	1
6992	9	16747	0
36950	0	7858	1
9690	8	20998	0
37297	0	27656	1
35361	2	2870	0
37707	3	23728	1
37080	3	14714	0
36587	5	27014	1
27173	4	31480	0
37504	6	10555	1
13390	2	17256	0
38051	0	38017	1
10313	3	1512	0
38051	2	2983	1
288	7	37747	0
37658	3	754	1
33334	0	2556	0
38103	0	28418	1
10118	4	12843	0
38103	2	2072	1
19814	0	7706	0
37352	0	27546	1
18414	3	4293	0
37510	3	36506	1
30294	2	2964	0
36726	1	36648	1
26864	9	4447	0
38105	0	35344	1
887	7	1620	0
38105	2	32356	1
31553	7	14745	0
37193	3	38149	1
11782	4	38137	0
37677	3	34466	1
9449	8	37547	0
36537	0	2371	1
17760	8	31551	0
37012	8	38135	1
37725	9	37475	0
36489	0	36024	1
9604	0	14154	0
36832	0	13830	1
25360	7	7438	0
36832	3	7730	1
7987	0	5191	0
37723	0	23731	1
13675	6	24398	0
37723	4	22777	1
12861	8	4186	0
36550	0	36531	1
37961	6	17180	0
36761	2	15969	1
12048	3	32950	0
37239	2	24197	1
4000	10	25921	0
37239	5	30000	1
9604	0	37912	0
37636	0	14228	1
8119	4	19426	0
37279	1	23431	1
4449	7	18764	0
37800	4	9976	1
5124	7	38040	0
37847	0	22328	1
22370	4	25484	0
38107	0	37417	1
19490	4	29528	0
37217	2	4182	1
15328	7	30509	0
37976	0	8808	1
19814	5	6260	0
36923	4	25820	1
6716	8	16728	0
37959	0	791	1
30375	0	33223	0
36561	0	12847	1
12158	7	6492	0
37553	2	30011	1
12283	7	37152	0
36833	0	35231	1
36586	6	15025	0
37857	0	6454	1
4300	0	9313	0
37078	0	5329	1
2069	6	37273	0
37078	3	11893	1
24325	2	386	0
37143	0	3636	1
37050	9	5324	0
37595	1	13127	1
1027	0	22163	0
37080	0	36497	1
15022	2	24747	0
36876	0	18521	1
25578	0	3987	0
37302	5	16105	1
22370	5	4447	0
37157	1	7205	1
18076	7	29528	0
37108	0	7214	1
12986	6	37601	0
37396	6	21392	1
33042	3	37011	0
36526	2	8265	1
5069	3	25267	0
36526	2	1087	1
4891	0	5191	0
37362	0	10484	1
35492	6	5932	0
38022	0	24834	1
34369	2	2625	0
36549	6	15215	1
3254	6	19640	0
38029	2	35252	1
13948	8	15075	0
37132	0	37347	1
15034	5	5526	0
37132	1	16794	1
32331	0	14973	0
36568	0	12760	1
27800	2	31301	0
37224	4	36552	1
1149	4	1094	0
37948	0	4251	1
2360	3	31553	0
37948	6	32706	1
12158	6	6787	0
36871	0	15826	1
16878	5	23000	0
36479	3	34007	1
21739	3	15712	0
38077	3	36929	1
24398	0	37050	0
38077	6	36493	1
20932	3	18941	0
38144	2	18398	1
36708	4	12963	0
38144	9	7584	1
37900	0	19490	0
38144	9	8265	1
36118	5	26764	0
38144	9	8635	1
23257	7	1693	0
36667	2	14986	1
35972	7	37531	0
36667	2	26724	1
36983	7	9479	0
38011	6	37428	1
21824	7	5576	0
38011	6	25693	1
9635	3	14611	0
36808	0	30635	1
23843	4	21681	0
37846	2	8320	1
29595	6	36988	0
37034	2	5749	1
11576	8	9377	0
36838	0	21578	1
5199	6	36716	0
36838	2	27803	1
13675	9	37873	0
36810	0	12847	1
16373	4	8034	0
37967	4	36780	1
23946	6	36661	0
37536	0	37168	1
4319	5	5576	0
36652	2	28443	1
37299	10	4609	0
37088	1	23431	1
36942	3	1026	0
37220	8	25879	1
36588	5	25516	0
37360	0	36749	1
21083	2	27032	0
36603	0	16897	1
13591	9	32876	0
37134	5	32870	1
36586	1	21509	0
37134	5	13926	1
37106	4	23210	0
37134	5	10858	1
19358	2	36574	0
36692	0	27726	1
28039	6	26212	0
36692	3	27880	1
36920	2	25413	0
37093	2	36305	1
11141	0	27470	0
37769	8	32652	1
27173	0	38089	0
37769	4	36826	1
37912	2	17320	0
37447	0	19720	1
37502	7	37596	0
37447	2	28216	1
36942	3	25432	0
37447	2	34865	1
18680	2	10134	0
36591	4	33064	1
32695	9	22278	0
36998	4	16267	1
4382	4	14747	0
36998	9	36074	1
28328	2	9457	0
38109	2	28566	1
33334	9	31283	0
38116	5	3190	1
21544	10	34846	0
38116	5	9057	1
21509	2	23386	0
36768	0	14611	1
37530	10	21739	0
37000	1	16794	1
29222	5	2256	0
37765	2	32448	1
16174	3	15986	0
37734	2	5800	1
3857	5	6716	0
37526	3	37706	1
35640	3	26844	0
37485	0	37035	1
9794	6	7299	0
38017	2	38051	1
29141	3	19640	0
38006	2	19550	1
37060	7	29659	0
38006	2	32820	1
38149	3	38089	0
36624	6	32674	1
298	6	10058	0
37589	0	18922	1
30734	7	26922	0
37377	3	37848	1
8034	7	19407	0
37844	8	25354	1
5526	0	19944	0
37659	4	7083	1
3083	3	22631	0
37905	0	15443	1
4891	2	15689	0
37158	8	21977	1
22370	6	44	0
38132	2	13926	1
30197	5	11782	0
38133	9	18121	1
36588	9	3439	0
36585	6	8127	1
31582	8	26764	0
36658	3	11609	1
686	7	16388	0
37792	0	3554	1
16022	3	3385	0
36758	6	29963	1
37582	2	36764	0
36770	2	33044	1
12611	4	15986	0
36786	3	36869	1
23436	5	36454	0
36534	0	32555	1
21613	9	17690	0
36990	3	26928	1
16174	9	33279	0
36975	0	37936	1
26486	8	36940	0
36498	2	25230	1
6545	5	6169	0
38098	0	17292	1
31480	10	5851	0
36441	0	35770	1
14879	8	36503	0
37068	4	33818	1
4319	10	12725	0
37068	5	36994	1
38040	3	5404	0
37068	5	5670	1
3197	6	14685	0
37068	5	36523	1
24581	0	23700	0
37066	1	10068	1
14554	7	30833	0
38153	0	20685	1
35640	1	34117	0
36698	0	19527	1
26864	8	25596	0
37115	3	10863	1
13731	3	12764	0
37620	1	1590	1
4293	3	8336	0
37729	2	36518	1
33498	4	12963	0
36494	0	10309	1
37596	2	13875	0
37163	0	13830	1
30197	5	37797	0
36812	0	37083	1
23254	7	24081	0
37442	9	11718	1
38089	1	32876	0
37442	9	615	1
16728	1	14437	0
37698	3	6021	1
8041	1	31798	0
36819	5	7708	1
23000	0	12963	0
37467	0	14874	1
37502	0	2104	0
37914	0	36024	1
19944	9	23000	0
36491	0	8588	1
7168	2	1620	0
37639	0	9557	1
2104	9	21083	0
37639	6	30608	1
37273	8	1973	0
37639	6	16023	1
13874	2	21083	0
36581	3	31537	1
11863	3	22914	0
36606	3	23214	1
32905	2	37589	0
37657	6	27726	1
15169	1	10058	0
37657	6	37848	1
11863	4	10532	0
36932	0	18455	1
12764	7	18941	0
36805	0	37802	1
4891	0	36869	0
36727	4	30693	1
23441	2	1973	0
37633	5	32915	1
18311	8	1149	0
36499	5	4748	1
36471	8	37651	0
38123	0	11068	1
15493	9	36463	0
37221	2	29605	1
3063	6	13162	0
36601	6	26924	1
19232	5	15870	0
37841	6	35326	1
36666	4	31034	0
37979	6	37543	1
21613	1	31560	0
37794	5	36717	1
4300	10	25484	0
37391	0	23149	1
36869	9	9840	0
37036	0	30150	1
37886	6	30552	0
37818	0	9615	1
11967	2	33269	0
36831	0	1484	1
3439	3	13731	0
37298	4	14467	1
32905	6	4746	0
37298	4	31988	1
3877	4	15832	0
37610	0	14810	1
16174	5	16174	0
37610	3	29805	1
19347	8	23843	0
36668	6	26852	1
32331	4	29152	0
37044	6	37036	1
37379	9	36702	0
37375	0	36763	1
21083	1	22047	0
37225	0	21774	1
27497	3	13675	0
37225	2	23154	1
4811	7	36842	0
36622	0	37994	1
3339	3	18195	0
36622	2	17612	1
38104	5	6260	0
37623	2	12004	1
31480	6	10910	0
36784	2	27190	1
1861	2	37896	0
37514	0	21858	1
37439	5	36586	0
37209	0	16611	1
36676	7	16513	0
37807	0	19041	1
27610	5	22196	0
37441	3	29805	1
34117	8	2019	0
37320	3	21949	1
27656	1	15961	0
37320	2	27714	1
4966	10	10920	0
37320	2	19776	1
27817	3	37886	0
37320	2	32933	1
23288	1	34116	0
37320	2	3790	1
13162	4	31716	0
37320	2	33906	1
7400	1	7875	0
37373	0	19527	1
14594	1	37317	0
37373	6	25892	1
2410	3	33848	0
37580	2	35180	1
29456	4	7530	0
37484	3	30512	1
8314	6	22799	0
37484	6	721	1
33453	6	8652	0
37484	6	19156	1
37814	5	14609	0
37484	6	14138	1
10141	0	735	0
37484	6	20474	1
844	7	11487	0
37829	0	19542	1
36463	6	17180	0
37016	0	21235	1
21789	8	37004	0
38033	2	8872	1
37724	1	7693	0
37262	5	23911	1
36717	0	36530	0
36983	8	19794	1
32331	5	16450	0
37572	4	37572	1
19319	8	6716	0
36750	0	37704	1
25516	2	1715	0
36750	4	1202	1
30144	8	21160	0
36493	3	38077	1
15712	7	7922	0
36501	2	37773	1
29817	10	5821	0
38156	3	3787	1
9252	5	30648	0
37660	3	28746	1
13153	10	34543	0
38002	2	36275	1
21426	3	31113	0
37726	3	13142	1
9037	4	17625	0
38080	3	28421	1
37847	8	3770	0
38080	5	38080	1
36988	9	161	0
36971	1	16794	1
10058	5	17256	0
37086	0	13282	1
8296	2	10773	0
38120	3	18100	1
4171	2	1027	0
38120	2	26669	1
22389	6	17256	0
38113	2	15795	1
20091	3	7706	0
37795	6	8230	1
14437	7	19545	0
37772	3	14179	1
21808	8	11790	0
36925	3	20791	1
34730	1	35640	0
36925	6	32953	1
30825	10	4966	0
37893	2	5107	1
8314	9	14342	0
37893	2	2655	1
25431	4	7922	0
36615	2	10856	1
31560	3	38049	0
36615	2	15099	1
5495	5	15870	0
38148	2	19518	1
501	0	3197	0
38148	2	33803	1
20932	4	37898	0
36513	0	36774	1
35361	6	7211	0
37926	2	16639	1
17082	9	16563	0
37926	2	5492	1
11648	7	2465	0
37038	4	30581	1
20978	1	36940	0
37341	4	37132	1
12858	1	18009	0
37067	3	29884	1
3820	5	3820	0
36607	2	30911	1
13358	8	21897	0
36746	3	1909	1
37439	0	18650	0
37428	5	21487	1
37749	5	28417	0
37798	6	35388	1
12870	4	23035	0
37849	8	2647	1
10773	4	26864	0
37849	5	10566	1
22670	7	24306	0
37749	0	17140	1
1702	2	12861	0
37749	1	15712	1
19676	6	3820	0
37920	3	10677	1
19676	3	27840	0
36842	2	28253	1
13827	10	19052	0
37583	2	30383	1
2741	4	24306	0
37547	0	2509	1
38128	8	422	0
36470	0	21245	1
6716	0	7400	0
36634	0	11068	1
2556	9	27855	0
38046	0	31462	1
105	7	9604	0
38046	2	18409	1
36702	7	29044	0
37906	0	32677	1
686	7	804	0
37507	3	37706	1
18667	1	20091	0
38111	0	30693	1
16794	2	17017	0
36793	0	36498	1
887	1	31551	0
37550	0	29491	1
12725	7	8281	0
37395	2	29233	1
2388	8	5410	0
37403	2	37627	1
14298	4	19117	0
38154	3	14149	1
37446	10	10579	0
37640	3	20397	1
6930	2	29528	0
36579	2	35580	1
12963	9	21002	0
36636	2	1979	1
32695	10	12611	0
36636	2	247	1
7576	8	17844	0
36636	2	33778	1
6260	0	5164	0
36636	2	37701	1
35847	1	37898	0
36636	2	21500	1
37770	1	14647	0
36636	2	8482	1
37786	0	27255	0
36636	2	2998	1
3439	4	12996	0
36636	2	34523	1
11508	0	37900	0
36636	2	5415	1
28039	9	34116	0
37405	1	37621	1
12999	4	19117	0
38062	0	30698	1
32950	1	37994	0
37184	5	8935	1
10118	3	36981	0
37525	0	36024	1
16196	7	37677	0
37897	0	2392	1
23210	0	12861	0
36655	5	25470	1
346	1	38145	0
38092	0	32555	1
10058	2	22389	0
38092	3	23728	1
34481	4	25934	0
37333	3	37372	1
25413	10	3877	0
37333	2	20171	1
13358	0	10141	0
36799	3	4248	1
3063	9	16424	0
38000	2	1057	1
22631	8	22816	0
37931	4	31359	1
21544	3	36831	0
36879	0	28844	1
8623	0	14609	0
36715	2	37774	1
12861	8	16659	0
36697	0	37734	1
22799	5	971	0
37882	4	2852	1
9604	0	18053	0
37882	2	35695	1
10920	6	36861	0
37501	8	37383	1
25882	0	12048	0
37274	5	1467	1
26511	0	35361	0
37274	5	14628	1
5210	1	30734	0
37554	4	5419	1
21083	4	12861	0
37324	0	37335	1
10118	3	13731	0
38030	3	11609	1
14647	5	38089	0
38030	6	7121	1
6092	5	37732	0
36471	0	27242	1
26922	3	3639	0
36471	2	17980	1
13153	4	14973	0
36471	2	37236	1
13190	8	8454	0
37746	6	27984	1
36988	4	31856	0
37746	6	28250	1
25432	9	3440	0
37746	6	11720	1
16563	10	38145	0
37925	0	36325	1
37502	2	23632	0
37470	3	5074	1
1009	8	36983	0
37470	2	9324	1
4447	9	16728	0
36663	4	263	1
8281	7	23436	0
36753	6	31296	1
32876	7	19545	0
37727	2	20940	1
32475	1	10747	0
37727	2	16166	1
5821	1	3857	0
37752	2	3746	1
37900	2	38052	0
37273	3	37435	1
21160	3	38149	0
37273	6	17110	1
13263	4	24249	0
36862	0	24877	1
1063	4	4449	0
36862	3	37028	1
36584	5	5093	0
37561	0	35756	1
8041	3	1711	0
37056	8	36131	1
15022	2	29426	0
37056	8	9093	1
35093	8	35847	0
36806	0	27068	1
14780	2	31856	0
36806	2	20338	1
19545	9	7576	0
37126	3	31912	1
36716	8	19484	0
36648	9	5106	1
34928	10	34590	0
36648	9	5337	1
29121	8	21739	0
36648	9	4998	1
38104	2	18471	0
36648	9	9710	1
3440	10	37530	0
36648	9	7589	1
18311	0	26281	0
36648	9	18576	1
33042	4	38052	0
36648	9	29747	1
14879	9	5932	0
36648	9	7804	1
30144	10	12443	0
36648	9	7316	1
23566	3	23436	0
36648	9	14445	1
36666	0	36684	0
36648	9	21511	1
31800	1	7438	0
36648	9	29711	1
33453	9	15961	0
36648	9	503	1
1094	2	22047	0
36648	9	23812	1
12283	0	12764	0
36648	9	29237	1
17180	7	21897	0
36648	9	38027	1
6092	0	27656	0
36648	9	36472	1
3778	1	8336	0
36648	9	4558	1
37446	9	15788	0
36648	9	8233	1
22370	0	28943	0
36648	9	22755	1
21897	6	27313	0
36648	9	36726	1
36764	1	33498	0
36648	9	12418	1
25450	3	25882	0
36648	9	24148	1
1697	0	37747	0
36648	9	26493	1
30509	4	19052	0
36648	9	811	1
29198	1	36831	0
36648	9	17232	1
32950	3	26511	0
36648	9	4239	1
15075	7	3197	0
36648	9	10008	1
31293	5	36716	0
37317	0	3113	1
22816	1	22487	0
37251	5	21966	1
11925	3	30294	0
37251	5	3395	1
37886	5	10933	0
37752	2	32698	1
32905	6	3897	0
38082	0	10734	1
15075	10	5495	0
36874	0	22118	1
37724	0	37873	0
36874	4	35725	1
25516	2	37446	0
37834	0	25507	1
30197	9	3987	0
36756	0	31241	1
16513	8	29659	0
36660	2	37587	1
24306	3	34297	0
37592	0	12901	1
8193	1	22050	0
38004	3	6705	1
422	8	35514	0
36800	6	11398	1
18074	4	16424	0
36432	0	36205	1
21808	7	38104	0
36744	0	38107	1
7978	4	37725	0
37070	4	24009	1
16174	10	30509	0
37070	2	36940	1
6509	9	23566	0
37596	8	38048	1
11863	10	29588	0
37596	4	15236	1
8545	2	2465	0
37885	0	9603	1
36788	4	25616	0
37885	6	36597	1
29198	9	7438	0
36926	0	17722	1
26864	8	37781	0
38122	0	24740	1
38137	9	4025	0
36736	2	30920	1
1297	8	21681	0
36505	0	32478	1
38118	1	37475	0
36505	3	37388	1
3778	4	12064	0
37560	2	14713	1
386	5	22389	0
37560	2	11977	1
5324	6	27497	0
37529	2	37590	1
25185	2	37875	0
37529	2	30958	1
37547	9	5096	0
37443	1	35124	1
14685	2	8296	0
37045	3	36487	1
4609	2	1711	0
37045	6	1188	1
37673	8	15034	0
38068	0	11340	1
31606	1	3987	0
38068	3	29025	1
31800	1	16373	0
38081	0	13853	1
19944	10	36684	0
38081	5	37530	1
7507	6	981	0
37029	0	31112	1
7226	4	8038	0
37029	3	37024	1
7400	5	7875	0
37743	4	3672	1
28176	8	8458	0
37896	0	19527	1
4449	9	36471	0
37896	6	4354	1
1202	5	29456	0
36868	0	5614	1
32475	7	37410	0
36563	5	38009	1
27610	6	27855	0
36517	4	27950	1
25664	3	23700	0
37870	0	29157	1
32652	1	19814	0
[truncated: 2,862 more rows]
