# Supplementary material
Source: ML conference proceedings conference paper supplement (https://proceedings.neurips.cc/paper_files/paper/2021/hash/0fd600c953cde8121262e322ef09f70e-Abstract.html)
Supplement: Supplementary file 1 [file 0fd600c953cde8121262e322ef09f70e-Supplemental.zip › Supplementary_Material_Paper_8745/data/Hamaguchi-BM_head-5000/train/train.txt]

27367	0	12156
27367	1	1590
25610	0	9486
25610	2	35480
4446	2	26334
32643	0	12492
29649	4	13270
29649	5	7626
13682	0	6267
36015	0	16352
36015	3	8790
31453	0	29233
31453	2	17303
31453	2	35562
31453	2	28921
31453	2	19438
31453	2	5565
11426	3	14419
11426	6	28103
6313	0	1435
6313	3	17813
18526	0	6734
18526	3	28054
1661	7	33876
28533	3	11045
28533	5	5622
11622	4	3375
11622	4	18171
11622	2	2406
6652	8	1748
6652	4	2662
3458	2	6093
3458	2	2621
3458	2	11839
3458	2	17563
3458	5	28014
3458	2	16552
3458	2	14417
3458	5	16072
3458	2	34999
3458	2	23932
3458	2	2093
3458	2	25521
3458	2	858
24910	0	255
24910	2	24399
10525	4	34295
10525	5	14626
12215	2	32490
20863	0	35770
808	0	33950
808	3	26627
35501	8	24263
35501	4	24238
23192	0	21199
24679	0	36325
24679	3	6480
33360	0	29268
33360	3	32638
16862	0	27726
16862	6	30025
33026	2	6463
10553	6	22229
11371	0	20484
11371	2	12456
29358	0	14810
29358	6	31683
15410	0	3478
15410	4	31878
32303	0	916
32303	2	27869
30720	0	14559
30720	4	5614
6449	0	35168
32912	0	2643
32912	4	11430
12360	4	30980
25243	5	27852
4243	0	4309
4243	2	22686
16742	0	3759
16742	2	2277
3423	2	33165
3423	2	22008
3423	2	27156
3423	2	18268
3423	2	2015
3423	2	11406
3423	2	18232
3423	2	28557
3423	2	23479
3423	2	5871
3423	2	16350
3423	2	462
3423	2	6593
3423	2	4233
3423	2	15307
3423	2	25500
3423	2	11456
28321	0	5244
28321	3	24035
17527	3	22924
17527	6	15110
17527	6	30539
1588	7	12925
14865	0	14835
1311	0	36024
1311	3	28746
1311	6	26871
32094	0	2595
32094	1	23431
21831	2	28347
31975	0	18826
31975	3	12356
4167	2	22228
4167	2	14151
4167	2	2819
7364	0	7606
7364	2	729
11055	0	33950
11055	3	33082
31968	2	6450
31968	2	32038
28962	0	5237
28962	2	13442
28962	2	35491
28962	2	24209
28962	2	1108
5588	2	1428
19088	0	30789
19088	3	36411
19088	2	8080
19088	2	1949
19088	2	8695
19088	5	3395
8589	0	13901
8589	3	30078
8589	6	24987
31483	0	27242
31483	5	20256
3844	0	24529
3844	1	23113
26971	0	9808
26971	1	25590
10785	3	11890
13767	3	28435
2496	1	33792
24014	8	2323
24014	4	6142
23185	2	23524
23185	2	25128
23185	2	11552
7970	0	22343
7970	3	9217
25953	0	1575
25953	4	9805
22668	0	18134
2722	2	12049
2722	2	19301
2722	2	24563
2722	2	20259
2722	2	18647
29160	1	23431
3912	0	14810
8355	0	12042
8355	2	4878
30967	0	18398
10278	2	21921
3477	0	26736
3477	3	9772
3784	0	15902
3784	2	26326
3784	2	22633
1076	5	13737
1076	5	24957
1076	5	1153
1076	5	1708
17968	0	21543
27600	5	3731
27600	2	35768
5796	0	11068
5796	3	27709
24541	3	2829
17380	0	32239
30738	4	5159
30738	4	23849
30738	5	21742
15194	0	28016
15194	3	26763
34200	0	12741
34200	0	1505
8022	0	9316
23640	0	19174
32266	0	30404
9581	0	33852
9581	2	27554
9581	2	6594
9581	5	13599
9581	2	20657
9581	2	5945
2269	0	3398
2269	0	28130
15962	7	24099
15962	7	11695
29632	0	10789
29632	4	20288
29632	2	22858
29632	2	21193
29632	2	4775
29632	2	1378
22129	0	31954
22129	1	6545
26305	0	12567
13655	0	20385
13655	3	17012
13655	2	14668
13655	2	19443
25491	8	24138
959	0	23215
959	2	2268
959	2	28106
30349	0	32616
18796	0	28423
18796	2	10332
18796	2	5624
18796	2	26845
18796	2	23163
32014	8	1748
2023	0	3644
2023	5	27861
1666	0	30508
1666	4	31815
36286	0	14116
36286	2	13176
36286	2	8877
17328	0	8872
17328	1	2195
35961	0	35431
34483	0	22671
15916	0	34100
15916	3	8647
12314	0	17016
12314	2	11870
2389	0	14810
2389	6	29908
15132	2	11485
4641	0	22343
4641	3	29792
34956	0	13764
34956	2	33443
9214	0	25531
18871	2	22780
18871	2	25419
6669	8	29602
19603	0	4990
21203	0	36340
21203	3	3983
20466	0	23375
11017	0	2060
3928	0	21858
19195	2	29739
26609	0	21803
26609	6	34828
26609	9	14648
32626	0	22343
32626	3	17185
34583	0	21558
34583	1	11357
1679	0	11540
1679	3	7025
10721	2	30641
10721	2	8222
10721	2	32604
10721	2	27135
10721	5	2682
10721	2	2634
10721	2	16341
10721	5	33579
10721	5	33761
10721	2	9613
8532	2	24664
8532	6	36257
8532	6	31743
12131	0	34487
12131	2	20905
23576	0	6204
25864	3	4012
32523	0	34623
15792	0	22981
16802	0	1611
16802	2	34381
16802	2	4038
35414	6	34105
26040	5	13157
27017	2	4841
3628	0	3746
3628	2	4155
35676	2	22698
18570	0	16870
18570	5	20340
33553	0	24877
33553	6	15316
18248	0	10870
14271	0	24877
14271	6	13775
36051	0	22485
36051	2	10876
14758	0	1578
121	3	10755
121	6	33032
26671	0	27022
26671	3	17887
28565	8	15246
2562	0	6326
2562	2	14781
2562	2	28724
22928	7	1180
12103	0	12847
10646	1	11567
28905	0	21870
7535	2	34246
28326	0	25351
28326	2	25387
35381	0	28073
35381	4	19795
20411	8	8186
20411	4	26202
17060	0	4110
26001	8	8186
26001	4	5415
16112	7	9473
36033	0	7703
15912	0	6380
15912	2	31664
18641	4	26933
18641	2	2479
1947	8	24263
1947	4	10585
6354	2	12563
36287	0	27726
36287	6	23073
36287	6	18309
36287	6	33933
19805	0	30862
19805	3	33365
28921	8	31453
30347	6	17972
28648	8	29602
28648	1	10068
31978	0	15673
17298	0	11462
17298	2	4202
10684	5	16526
23256	0	2307
23256	5	13302
12022	2	25147
12022	2	27998
16736	0	21844
13953	0	21412
13953	4	22599
36075	0	663
7718	0	32447
7718	2	33624
6637	0	23123
7623	0	27385
5406	0	3896
25520	0	24574
25520	3	30479
14799	2	18719
14799	2	28439
9321	0	35810
9321	5	12192
9321	2	21615
9321	2	27311
9321	2	18403
9321	2	15245
9321	2	29627
9321	2	12789
9321	2	1591
9321	2	8153
9321	2	9625
8412	0	16294
19107	0	1915
19107	3	14456
26727	0	9692
8298	0	36024
8298	3	25490
8298	6	32526
8298	6	29780
8298	6	19337
8298	6	393
8298	6	750
8298	6	3407
8298	6	35598
8298	6	17910
8298	6	12248
8298	6	35492
8298	6	12742
8298	6	10035
29320	0	4915
29320	0	23544
29320	2	18843
29320	2	28547
30416	3	24858
29549	0	14750
16972	0	2643
16972	2	29925
6969	4	22840
6969	4	24774
17192	0	1263
17192	3	14149
33527	0	8674
33527	2	18659
23379	0	1494
23379	4	21920
3424	0	13866
3424	2	15423
27945	0	33950
27945	2	27476
17154	2	28046
23162	1	2187
18210	0	7467
2313	6	34253
2764	2	15318
2764	2	4098
25245	0	16118
25245	3	30916
6945	7	29811
22361	0	8911
254	0	25405
254	2	34973
254	5	7301
254	2	909
4643	0	24686
4643	1	21147
23371	8	32746
8082	0	16836
8082	2	25004
17452	6	36278
17452	6	21024
1934	0	27355
1934	0	21719
8862	2	13256
22856	0	24710
16804	0	22343
27698	3	30387
27698	6	5804
27698	6	36248
27698	6	18852
27698	6	6333
27698	6	26383
27698	6	32258
27698	6	15879
27698	6	18551
27698	6	2932
27027	0	22980
11997	0	6111
11997	2	25480
11997	2	15835
11997	2	28588
11997	2	8713
18058	0	18455
18058	3	5895
32932	7	11695
15557	6	20954
4135	0	26796
4135	2	12915
20091	0	11068
20091	6	16665
8106	0	7623
8106	1	26641
8078	0	20572
8078	4	3375
17497	0	31929
17932	0	792
17932	3	10760
6485	0	12847
6485	3	17253
3079	0	26667
11037	2	16111
25469	0	4918
25469	2	8426
33561	0	15833
33561	2	15245
33561	2	27670
12994	8	30626
12994	3	4534
21488	0	295
21488	1	27492
15509	2	9626
18824	0	12776
18824	3	34679
1246	0	26118
35624	0	24877
35624	3	3909
35666	3	12159
35666	6	16456
3917	3	20634
19701	2	4585
19701	2	15351
19701	2	4943
19701	2	33981
35539	2	31376
35539	2	30055
35539	2	19885
29974	3	7855
20399	0	17222
31271	0	4905
31271	1	5235
27291	8	1869
27291	8	26156
5798	0	3742
5798	4	14441
5704	0	16961
5704	3	14389
11754	0	24789
11754	2	18950
33716	0	2571
33716	2	6405
31147	0	3625
28902	0	21090
28902	3	17263
34545	0	35528
24326	0	6204
3924	0	23930
20409	0	11289
20409	3	4766
36176	0	7038
36176	1	13127
6458	0	2476
6458	2	20242
6458	2	31226
22939	8	8710
2015	0	3423
2015	2	29505
9767	0	10527
25101	2	30373
7177	0	36399
13694	0	28959
26772	0	32813
10759	0	17196
10759	3	4867
30711	0	27950
30711	2	30357
30711	2	20213
10844	0	2239
3598	4	21933
3598	10	36291
34793	0	4237
10005	0	21503
18649	0	28505
18649	2	30011
18649	2	27133
4381	3	9479
28799	2	12911
28799	2	28395
15071	3	4675
8781	3	18385
27222	0	262
27222	2	33677
27222	2	33112
3150	2	14327
13631	2	16214
847	0	32616
847	4	17454
847	5	6431
847	5	35219
847	5	18081
847	5	33853
847	5	21885
847	5	11113
23779	0	27537
23779	2	23583
23779	2	7001
23779	2	24017
8308	0	1096
1383	0	31983
1383	3	32482
1520	0	35207
1520	3	26483
9545	0	10574
9545	4	847
24407	0	1
24407	3	20584
31818	0	4689
33147	0	30142
28244	3	22924
28244	6	1193
7381	8	24263
7381	4	33221
482	0	8963
99	0	2060
99	6	2738
28395	0	34217
30132	0	13910
30132	4	19986
30132	2	22553
30132	6	28476
1819	0	12847
1819	3	10791
27837	0	31462
27837	2	6168
27837	2	22142
22158	0	29572
22158	3	26311
1873	0	724
27294	3	16553
27682	8	29602
27682	1	10068
8485	0	8787
8485	2	25097
8485	2	7030
18335	0	18747
18335	2	18055
29814	7	12304
29814	1	28032
32810	0	8886
32810	6	11552
24397	0	10879
6628	0	9603
6628	3	5072
4547	0	35821
4547	1	16794
8256	8	15921
3765	0	10769
3765	3	21694
34060	8	29602
4411	0	8100
4411	2	28314
27710	8	8186
27710	4	7978
32511	0	2655
32511	1	16794
20267	0	36046
20267	3	10334
22582	3	21249
1157	0	35378
1157	5	29821
15716	0	35876
4041	2	5208
34438	0	35770
34438	4	29503
2851	8	27968
9273	8	33043
17682	0	26608
15666	0	26859
15666	3	12899
779	7	28428
2795	0	18256
2795	2	4457
28461	0	19085
28461	4	21339
22520	4	22520
31187	0	20021
31187	4	27807
27634	0	28505
12166	0	2775
34224	0	27112
1904	0	21376
1904	2	35520
1904	2	6439
1904	2	22180
1904	2	16567
33444	0	16780
33444	3	1522
33996	0	10880
33996	4	21097
33889	0	16293
33889	2	9942
10340	0	22328
10340	2	19922
15566	8	11708
15566	0	21277
15566	6	14006
3114	6	33220
17980	3	10821
17980	5	17980
2465	3	11787
32252	2	9574
32252	2	14212
32252	2	6175
32252	2	12633
29705	8	29602
28372	0	27751
28372	4	12675
21850	8	26936
18846	3	18755
1047	0	13617
1047	5	5737
7027	0	29345
16133	0	9532
16133	2	30510
13951	0	31023
7441	0	21422
7441	2	33159
14465	0	18267
14717	0	4251
14717	3	14334
25902	0	11749
29984	1	17901
227	0	30313
23058	0	34100
23058	3	16754
18205	0	12536
18205	4	35497
33881	0	34100
18748	2	10325
10229	1	16794
25184	0	34976
21442	0	29027
21442	0	13531
29449	8	1979
29449	5	35435
29449	5	8500
29449	5	35604
29449	6	5684
17813	3	3255
17813	6	29212
17813	6	6313
17813	6	25453
546	0	19578
546	3	20546
30654	2	26451
27366	7	1169
16523	8	13971
25732	0	11068
25732	6	28375
33507	0	25404
24427	0	18219
14636	8	14413
10822	3	673
18411	0	33870
3445	0	19720
18690	0	30789
18690	2	18944
18690	2	2816
18690	2	23369
18690	2	14515
24786	0	8311
24786	2	7951
34856	0	5505
34856	2	31885
34856	2	21784
25887	0	26755
36038	7	35164
22285	0	27726
22285	6	24791
21922	0	5485
21922	2	29277
26418	0	4219
26418	2	22472
16692	0	8005
16692	1	16794
16692	2	16026
30157	0	19192
30157	5	23580
884	0	18507
756	0	24516
36047	7	5424
23710	4	33745
7556	8	1748
7556	5	21078
28125	4	36279
5099	8	815
30145	0	22343
30145	3	20359
10717	0	6596
10717	1	26796
10717	2	17096
25787	0	1734
25787	2	1470
10373	0	19441
10373	1	27770
13884	0	24735
29084	0	24904
29084	2	31108
29084	2	34915
29084	2	18001
29084	2	9363
29084	2	14848
29084	2	21833
29084	2	9446
29084	2	16115
21843	0	15603
34089	0	21423
34089	3	11473
34089	5	34089
35254	8	23752
35254	1	17901
19246	0	22406
19246	3	5442
4254	0	14959
4254	3	26038
35445	0	15486
35445	3	16568
34312	0	24939
34312	2	12841
18504	1	8554
23538	0	32668
23538	2	33228
23538	2	28890
26409	0	27788
26409	5	32969
29771	0	24649
29771	2	26429
29404	0	18958
3140	7	36238
2739	0	26206
4115	8	29944
4115	3	23743
4115	10	31203
4115	5	20716
4115	6	668
8252	0	8787
8252	9	20286
16942	0	18016
16942	1	4535
12759	0	4334
12759	2	11718
12759	2	32323
28268	4	1500
28268	5	18742
28718	0	14483
28718	2	17270
27640	3	12104
8393	0	792
8393	3	19431
33423	0	2391
33423	1	23431
33423	2	34358
33423	2	1950
14228	2	29966
14228	2	22008
14228	2	21186
14228	2	17847
14228	2	16090
14228	2	15733
951	0	23948
951	3	12269
27993	0	7030
5975	0	9513
5975	2	13447
6412	0	22674
6412	4	14994
10767	4	29062
9543	0	19902
24848	0	27234
24848	5	24848
14353	2	3889
14353	2	10894
9606	0	1646
644	0	18400
25235	0	8246
30724	2	7374
30724	2	12454
30724	2	24723
30724	2	11549
23814	0	18847
34603	6	8844
16503	0	21143
16503	2	13403
8984	8	8186
8984	4	3873
8984	4	17957
24941	0	27555
24941	1	6152
11220	0	18455
11220	3	8419
32666	3	17404
32666	6	32946
32666	6	22437
28553	7	21314
28553	7	34511
9825	0	15927
26016	0	9245
26016	2	3691
26016	2	30925
26016	2	6507
28390	7	16842
28279	0	14639
28279	6	9695
21458	0	33548
15941	0	4737
15941	3	30816
23188	0	27472
23188	3	25591
30344	0	2392
30344	5	14797
30344	5	6179
30344	5	14830
24943	0	28255
24943	2	4863
3414	0	11801
3414	2	30621
21286	0	26362
14407	8	29916
14407	4	15343
33207	0	31548
179	6	30012
5174	0	35656
17370	0	4335
8010	0	15877
17130	0	5636
17130	1	1375
6671	3	18961
6671	6	10793
6671	6	9029
6671	6	23212
13911	5	19343
5394	0	17574
5394	3	4539
5394	5	21150
2612	0	36088
2612	3	5524
18458	0	8203
10831	0	1257
29910	8	2218
29910	8	2217
31118	0	27802
31118	3	26405
3246	0	17738
33932	0	19404
23036	0	20312
33775	0	25832
33775	2	20297
32594	0	21473
4803	2	9136
4803	2	33183
5578	0	4518
5578	1	8754
1570	2	31649
21726	0	32555
21726	6	899
24872	2	24792
35713	0	31463
35713	2	16335
5417	0	11824
5417	2	33318
6065	7	11414
10914	2	10741
10914	2	1578
10914	2	27254
10914	2	3542
27795	2	36371
1522	0	13830
1522	3	7730
1522	6	10186
1522	6	15328
1522	6	4059
1522	6	33444
1522	6	29783
1522	6	9880
2317	0	14219
2317	1	23099
2317	2	32435
32879	0	31462
32879	3	26148
32879	2	10477
32879	2	16880
32879	2	34016
3706	0	5564
4779	0	17376
35946	0	12638
35946	1	20430
9972	3	7847
10772	8	1582
10772	4	4700
16662	0	32122
29648	0	23079
7782	0	19527
7782	6	12878
7782	6	24088
7782	6	11482
6523	0	34487
33452	0	33950
33452	3	23907
33452	2	30723
33316	0	21858
33316	6	36224
33316	6	11059
33316	6	20032
274	0	31462
274	2	28280
14463	0	4110
14463	3	15045
14463	5	33107
33687	0	19485
33687	4	27532
23067	0	7797
23067	3	20870
19052	0	14639
19052	6	26565
19114	0	33950
19114	3	27835
9364	0	35502
23276	0	3646
35546	0	19720
31313	0	8746
31313	0	7179
19175	0	14432
28659	4	9912
28659	5	3497
1580	9	22912
1580	9	631
1580	9	21502
1580	9	5409
1580	5	34132
1580	9	28511
1580	9	36163
1580	9	11376
1580	9	24608
1580	9	20158
1580	9	32757
1580	9	31784
1580	9	1777
1580	9	20360
1580	9	4141
2294	0	27584
2294	3	28598
5439	0	11540
5439	3	32578
24824	5	31684
24824	5	29314
24824	5	17109
14140	0	7623
9178	0	8911
9178	4	30022
4431	0	9656
4431	3	8533
24518	3	13980
24518	6	8739
24518	6	7228
28879	4	4700
9827	0	22485
15873	0	10011
15873	3	18634
11558	2	15267
11558	2	11142
19357	0	29848
19357	5	34377
23158	0	10811
23158	3	30901
2337	0	7107
2337	3	4732
16472	0	18455
16472	3	30585
27939	2	10999
16499	2	30754
16499	2	3662
25308	8	29602
25308	1	10068
2743	3	2602
2743	5	3365
13525	0	25428
13525	3	24430
14251	3	22165
14251	6	5696
33922	7	17773
32300	0	10011
32300	6	22944
32300	6	26247
32300	6	26762
32300	6	3391
16787	8	1748
16787	4	23849
27507	0	15733
27507	2	14603
5020	0	22343
5020	3	35559
24069	6	30246
24069	6	17159
24069	6	33892
24069	6	17011
31517	0	8265
31517	2	26632
16468	0	1746
18648	0	18989
18648	2	22642
18648	2	20868
18648	2	782
19871	0	12847
8314	8	31685
8314	3	27170
33472	0	10659
33472	3	29383
28679	8	8186
28679	8	9075
32271	0	23223
32271	0	36139
2170	0	16070
2170	2	25212
2166	0	16775
2166	4	3375
2166	5	3692
15161	5	10763
12183	2	13735
12183	2	14628
20501	0	12847
20501	3	24012
15445	0	9559
15445	2	35574
15445	2	1098
8910	0	127
8910	3	25234
17029	0	9720
33347	8	26798
33347	8	30135
1177	0	20567
25337	8	1748
25337	4	22954
33358	3	16713
33358	6	22430
10176	0	22343
10176	3	6225
5834	3	30858
21323	2	35356
1597	0	10895
1597	2	29683
19618	0	7384
19618	4	11002
15274	0	13335
15274	3	26083
26787	0	23997
22080	0	7657
22080	2	25468
22080	2	29640
4159	0	28458
4159	4	26510
4159	4	19069
4159	4	33745
4159	4	30022
4159	5	4510
4159	5	6284
25015	0	33908
25015	3	222
896	2	6083
34802	0	26685
34802	2	9738
32390	0	4428
32390	0	6
19533	0	33653
19533	2	34854
19533	2	31183
6405	0	33716
7025	8	13853
7025	4	33818
7025	6	1679
13754	0	16186
25282	0	2759
25282	3	34282
26419	0	2809
26419	3	1033
26419	5	18965
26419	2	27414
17792	2	7403
6188	0	3385
6188	2	12426
6188	2	25272
6188	2	35396
6188	2	14225
6188	2	12338
6188	2	8869
4197	0	2881
4197	5	4065
22018	0	28527
22018	3	7461
14466	0	8304
26748	0	17752
26748	2	30405
35159	0	12136
8041	0	4032
8041	2	26176
5242	0	12847
5242	3	30691
21934	7	22028
25227	0	22343
19045	0	32016
19045	2	9910
26233	3	36276
26233	2	33428
26233	2	6453
26233	2	19956
26233	2	9746
26233	2	31341
31111	0	25268
31111	2	536
17800	0	12090
23793	0	33928
23793	2	27576
27868	0	25404
27868	3	21703
17010	0	16953
17010	4	17010
11858	2	28788
11858	2	9637
17602	8	17781
19433	0	36195
19433	3	21392
19433	2	33425
19433	2	8386
1355	0	24877
1355	3	18200
18744	0	11423
18744	4	14994
192	9	10679
192	2	19959
192	2	16794
192	9	33304
192	9	35487
18731	8	20973
18731	4	29853
12113	0	32071
12113	2	33036
12113	2	7596
24629	0	35729
24629	5	23617
7245	3	10334
22359	0	31687
22359	0	26085
22271	2	23563
22271	2	10116
14123	0	13115
14123	2	17453
111	0	18495
111	1	2187
10826	0	12847
10826	3	8292
30409	0	24170
16530	0	8168
16530	2	987
12505	0	21014
9477	0	30907
26295	0	13625
15937	0	18372
15937	1	22109
14224	7	26977
14224	7	17182
10175	0	34703
10175	3	14208
20687	2	25973
20687	2	20910
4825	2	12472
4825	2	28978
33061	0	4728
33061	3	17443
15363	0	2327
15363	3	10840
29784	5	32588
36261	1	26641
1439	2	3156
1439	2	8912
1439	2	35720
1439	2	1496
1439	2	5996
1439	2	28516
1439	2	26968
32536	0	32433
32536	0	21790
25379	0	26431
25379	3	12792
15382	0	7384
14994	0	31834
14994	5	6412
14994	5	18744
32194	0	32750
32194	1	5571
20345	0	36349
20345	2	7573
16313	0	25239
16313	3	27061
212	0	26571
20688	0	16318
20688	1	19543
20688	2	22451
20688	2	13674
20688	2	32664
32895	8	2917
32895	8	24171
19211	0	7195
19211	2	14223
19211	2	15611
19211	2	24997
24410	8	8186
24410	4	4333
13409	7	9981
13409	7	26651
6534	0	33950
6534	3	24831
31215	0	25595
32457	0	11886
28610	0	2327
28610	3	31825
15398	0	365
15398	3	12369
13952	0	10963
13952	3	32076
12942	0	11537
12942	3	30585
12942	5	3771
27842	0	24383
27842	5	5760
27842	5	30288
27842	5	32184
27842	5	27249
27842	2	28181
6467	0	92
32560	0	35431
32560	3	34889
32560	5	31047
20246	8	13243
20246	8	21977
16822	0	22629
16822	4	13141
34349	0	14810
34349	3	16354
34349	6	35649
534	0	34230
534	2	27863
534	2	27911
31490	0	9942
31490	4	4722
34144	0	24220
18176	0	34841
18176	3	20221
18745	0	29550
18745	1	30718
17153	0	18455
17153	6	15668
32822	0	13085
34227	0	21321
34227	3	18438
32596	0	14655
19454	0	27207
19454	2	17198
818	0	419
818	2	33395
818	2	4796
818	2	7522
818	2	17958
818	2	20634
3408	2	35409
3408	2	30775
3408	2	21734
20541	8	8186
20541	4	87
29299	0	607
29299	2	28584
18885	0	28583
18885	2	26767
31850	0	27950
11633	0	7012
11633	2	20151
11633	2	30322
14951	0	19018
34447	0	11340
34447	6	13830
9739	0	7519
9739	3	10978
9739	2	30906
14126	0	36024
14126	3	28746
14126	6	30853
17707	0	12530
17707	2	7726
35178	0	6036
4302	0	10931
4302	2	10410
23339	8	24138
23339	4	734
22311	0	9418
24437	8	33672
12074	0	9047
12074	1	10994
12074	2	23833
15691	2	30519
24719	0	20277
11191	0	20701
11191	3	31488
20248	0	22283
20248	1	17824
20248	2	33895
6808	0	36325
6808	3	28824
6808	6	2288
33804	0	23132
33804	4	7756
24476	2	7492
24476	2	17168
24476	2	20622
1837	0	2416
5481	0	1907
33047	0	5939
33047	3	16992
21533	0	10929
12297	0	2391
12297	1	23431
12297	2	10571
12297	2	30378
12297	2	28971
34365	0	22343
34365	3	18566
30849	0	23018
30849	4	6008
26485	0	31496
26485	0	12684
15978	7	35661
15978	7	27182
15978	7	33035
6789	0	9012
16637	0	811
21940	0	35643
8531	0	26933
8531	2	9530
8531	2	13080
8531	2	36256
8531	2	13612
35861	0	28960
35861	4	31878
14737	0	33928
16582	0	1787
20087	0	12847
20087	3	22324
30430	0	22645
30430	4	21097
9335	0	27726
15832	3	14599
16746	0	30460
36109	0	21182
36109	3	8269
36109	6	35287
36109	6	23708
36109	6	18357
20620	2	19878
30252	4	686
30252	2	7410
32812	0	28508
32812	1	6827
8670	0	13194
8670	1	1590
2369	0	14863
7818	8	12057
28398	4	4722
28398	3	28635
10405	0	5556
10405	2	2992
10405	2	13644
10405	2	13483
10405	2	34148
10405	2	30423
10405	2	34291
10405	2	36187
10405	2	1189
8010	1	23431
33625	0	5939
33625	5	29067
34471	0	21813
22297	0	28901
24390	0	21411
1092	0	33447
1144	0	33950
1144	3	222
17038	0	3537
4036	0	27207
11135	0	12776
11135	3	22315
4289	4	32043
20680	0	6559
20680	6	34444
12584	6	24078
3080	0	12168
3080	2	12336
31541	0	10395
19033	0	22968
23416	0	24877
23416	3	16494
23416	6	29707
17507	0	728
17507	2	16480
11100	8	12791
11100	4	4729
11116	0	35956
11116	0	9289
25833	0	12004
11962	4	11430
5857	0	35638
5857	2	30290
5857	2	8630
5857	2	6704
5857	2	12863
5857	2	33297
14918	0	17955
14918	2	34513
4905	0	20876
4905	2	35238
4905	2	31271
22934	0	7247
10758	0	12453
1541	0	3690
1541	2	28087
1541	2	27334
23127	0	1904
28262	0	10734
28262	5	27127
20927	0	18455
20927	3	3126
20927	6	20988
18347	0	12847
18347	3	20844
23942	0	4942
23942	1	30718
10823	2	30370
35867	2	3268
35867	2	15902
22384	0	19160
8818	8	24001
8818	8	30135
26665	0	36024
26665	3	25490
26665	6	18702
31074	0	33462
31074	2	14221
25807	0	3053
27869	0	32303
6252	0	15769
2309	8	15921
2309	4	34895
33786	8	13243
2800	0	10963
28751	0	35553
31267	2	26959
29140	0	31960
29140	3	14493
13264	0	9451
13264	2	33226
3315	3	32135
3315	6	2382
8879	0	27472
8879	3	25591
36256	0	8531
36256	5	9010
9157	7	23582
4809	8	16346
4809	4	5946
3393	0	1332
30674	0	29572
30674	3	26311
30917	0	29268
30917	3	32638
25065	0	19165
25065	3	7018
13373	3	26253
13373	2	32483
13373	2	30210
30374	0	35841
30374	2	20415
30374	2	32079
30374	2	29518
30374	2	29300
30374	2	26760
30374	2	14997
30374	2	21491
17724	0	9186
6123	0	29572
6123	3	26311
12550	0	30572
2413	1	26796
2413	2	25367
2413	2	15654
2413	2	35097
2413	2	26329
2413	2	17466
9564	0	25814
9564	1	5235
2706	0	16338
2706	1	23431
22211	0	22030
22211	4	16852
22211	2	5002
22211	2	15120
22211	5	16264
2929	8	2917
32181	0	35674
3309	0	27336
8817	0	35143
12659	0	27726
12659	6	27716
12659	6	22007
12659	6	25264
12659	6	22654
12659	6	16757
29777	0	25568
29777	2	3976
937	0	12847
937	3	22857
31158	0	24877
31158	6	34332
566	0	6154
35271	0	19527
32482	0	36024
32482	3	28746
32482	6	1383
32504	8	21479
32504	4	32307
32504	4	31567
32504	5	28934
32504	5	17131
32504	5	34271
32504	5	31209
7104	0	12847
7104	3	2656
16221	2	11327
16221	2	12431
25078	0	2393
25078	2	14296
27725	0	17917
27725	2	22121
19511	0	14787
34258	0	4110
34258	3	16875
23021	0	14810
23021	3	21739
23021	6	19812
6497	0	34589
6497	3	9261
132	0	5579
132	2	6772
34853	3	2326
2113	2	28190
2611	2	7373
2611	2	1255
2611	2	33151
27929	2	27198
27929	2	2808
1476	2	33361
1476	2	12082
1476	2	585
1476	5	7930
21063	0	2327
18792	4	27696
24210	0	23196
24210	5	4291
35018	0	33950
262	0	679
262	2	27222
262	2	24611
262	2	24314
31450	0	25208
31450	5	2606
19525	0	2327
19525	3	6361
25510	0	12822
4684	0	19527
21882	0	1942
29645	0	14810
29645	3	2563
29645	6	25122
23281	3	5823
23281	6	240
3272	0	33871
3272	2	31722
24921	0	10339
24921	3	25089
14014	0	15953
14014	3	9502
6957	0	22479
6957	1	22524
26018	0	35915
978	0	33950
22954	4	8052
22954	5	25826
22954	5	26765
22954	5	21634
22954	5	22571
22954	5	22094
22954	5	2513
22954	5	25337
22954	5	19370
22954	5	27703
34685	0	791
34685	2	27450
34685	2	27905
34685	2	17532
34685	2	23011
2691	7	10163
27496	0	28273
3398	2	10857
3398	2	29590
3398	2	2269
34163	0	9451
34163	2	10915
34163	2	23223
34163	2	13319
34163	2	7233
34163	2	9591
34163	2	6586
942	0	4335
3405	0	6563
13381	0	28661
28087	0	1541
27522	0	27422
21839	0	20748
21839	2	29093
602	0	21892
13678	0	24337
13678	3	2740
34755	1	18930
19999	0	25536
19999	3	7134
32952	8	2323
3565	5	15677
18368	0	34448
18368	2	17592
18368	2	13413
18368	9	27358
18368	9	29988
18368	9	17495
18368	9	13784
18368	9	17699
18368	9	28194
18368	9	31290
16409	0	7623
3337	7	29978
3886	0	25560
12285	1	33053
12285	2	31481
12285	2	17243
12285	2	28142
12285	2	18787
12285	2	3821
12285	2	9322
25211	0	14934
25211	2	20857
17708	0	9541
17708	3	18321
19203	0	17385
19203	3	26731
21086	2	8068
2292	0	26320
2292	3	21133
20876	0	22328
20876	2	4905
20876	2	18285
18360	0	12492
33824	0	9415
7172	0	6264
18192	0	2756
18192	2	8842
6978	0	4735
6978	5	24661
22474	2	19796
16206	0	1263
20044	0	16611
20044	2	10595
20044	2	15507
20044	2	25638
20044	2	3914
20044	2	5184
20044	2	28642
35047	0	33950
35047	3	647
1447	8	8186
20613	0	5426
5138	0	36205
5138	3	15529
638	7	2442
5377	8	815
719	0	1263
719	6	19568
31115	0	4503
31115	2	7106
19470	0	33897
27435	0	29739
19010	6	24773
29043	2	2299
29043	2	30415
29043	2	25391
22326	0	4412
22326	4	14005
22326	5	13789
22326	5	29633
1523	0	7954
35830	0	34804
25120	2	28531
25120	2	29334
25120	2	19501
25120	2	36295
8371	0	23005
31485	0	2439
31485	4	35554
12552	4	31083
1998	3	8360
14801	0	20533
5939	0	5970
5939	2	18552
5939	2	31999
5939	2	17441
5939	2	10040
5939	2	21099
5939	2	6448
5939	2	32467
5939	2	27661
5939	2	9869
5939	2	2731
5939	2	33047
5939	2	10731
5939	2	33625
5939	2	19241
5939	2	35326
5939	2	4874
5939	2	35742
5939	2	10104
5939	2	25442
5939	2	33518
5939	2	28474
9127	0	20389
5513	0	14724
5513	3	30182
32043	4	31767
32043	5	1725
32043	5	4289
5182	2	22170
7669	0	22416
7669	2	27730
11187	1	5235
26967	0	24958
25956	0	25934
25956	2	23923
31826	0	27126
31826	2	34188
7780	0	21847
7780	2	13423
7780	2	13006
7780	2	11641
11805	0	11972
11805	2	19097
18628	0	32402
18628	3	36198
32294	0	30501
4548	0	11435
3966	0	36190
11778	3	10588
29169	1	18772
26984	0	19524
28119	2	33254
30541	0	32465
32645	0	32804
32645	2	18201
6046	0	10789
6046	4	30988
29367	0	1263
29367	6	23380
29367	6	9080
29367	6	30600
29367	6	23716
29367	6	6298
19374	2	29621
10758	0	5055
7835	0	26755
7835	3	5401
828	0	9295
21218	0	23752
21218	2	772
21218	2	22744
60	0	12008
60	4	17435
24027	2	36153
24027	2	14732
18470	0	28844
5070	0	10580
25744	0	26271
28427	0	12280
28427	2	13613
32775	0	24439
19493	0	14005
19493	0	32788
19493	2	23571
27207	0	8505
27207	2	19454
27207	2	4036
27207	2	5722
27732	0	36024
27732	3	28746
1697	2	12536
1697	2	8043
1697	2	13156
15293	0	31044
15293	2	31323
15293	2	21045
15293	2	33633
15293	2	31406
4071	0	33524
16560	0	35797
16560	5	4124
9480	1	16267
29671	0	30269
29671	2	31333
29671	2	29328
29671	2	851
18450	3	28746
18450	6	22557
8640	0	28505
8640	2	30300
2879	0	12529
2879	4	25896
2879	5	1638
2879	5	17186
2879	5	26354
28428	7	779
18837	6	31176
18837	6	19873
18837	6	17278
25487	0	22629
5721	8	8953
5721	1	7772
19468	0	6581
26331	2	31315
26331	2	17382
26162	0	9053
26162	4	17432
9008	0	10358
9008	4	3547
23506	1	5235
2490	0	6326
31904	0	5329
31904	3	27255
31904	2	3416
31904	2	35799
10212	1	30930
13486	2	20730
13486	2	28352
13486	2	22886
13486	2	5350
21884	0	28130
21884	2	9416
22254	2	19280
22254	2	30502
22254	9	16247
25409	0	6581
25409	4	35852
34189	0	19766
34189	3	20546
30632	0	17732
30632	3	34571
7358	0	27267
7358	2	21345
11406	0	3423
11406	2	22140
11406	2	406
11500	0	4597
11500	4	3672
11500	1	20599
16761	0	10467
19872	3	34555
29586	0	9451
29586	5	15562
29586	5	29538
28829	2	26071
28829	2	23694
28829	2	30403
17592	0	18368
10853	0	23132
10853	4	32366
22652	0	28557
22652	2	17946
13345	0	1942
13345	2	17746
34028	0	26735
34028	3	1871
23566	0	33053
19420	0	7808
19420	4	1282
36265	0	19160
36265	2	27433
36265	2	19780
17096	0	33325
12286	7	16135
29869	3	19080
10003	5	122
30203	0	32555
30203	3	25258
30203	6	15673
30203	6	30605
30203	6	15222
30203	6	21624
30203	6	1166
30203	6	13999
30203	6	31978
30203	6	31708
30203	6	6343
30203	6	29230
13161	0	17108
13161	2	23525
13161	2	19283
26057	8	8186
26057	4	5415
16356	0	13563
16356	1	23431
16356	2	27979
16356	2	13700
16356	2	13394
[truncated: 90,309 more rows]
