# Supplementary material
Source: ML conference proceedings conference paper supplement (https://proceedings.neurips.cc/paper_files/paper/2021/hash/0fd600c953cde8121262e322ef09f70e-Abstract.html)
Supplement: Supplementary file 1 [file 0fd600c953cde8121262e322ef09f70e-Supplemental.zip › Supplementary_Material_Paper_8745/data/Hamaguchi-BM_tail-1000/test/test-graph.txt]

37383	4	13577
37383	5	7800
6804	8	37284
37778	2	31963
841	0	37922
38118	0	21427
38118	6	31622
38118	6	27400
38118	6	21611
38118	6	33339
38118	6	23741
38118	6	22143
38118	6	35341
38118	6	659
38118	6	22436
38118	6	17958
38118	6	3196
38118	6	10166
38118	6	13071
38118	6	34533
38118	6	19842
38118	6	8392
38118	6	33365
38118	6	20665
38118	6	13441
38118	6	29810
38118	6	3290
38118	6	36853
38118	6	28662
38118	6	22267
38118	6	15623
38118	6	5178
38118	6	26384
38118	6	25917
38118	6	7096
38118	6	34159
25213	0	38040
30025	0	38134
33650	4	38167
7531	0	37461
11312	0	37922
37671	0	31491
37671	3	37232
37671	2	8259
37671	2	2004
37671	2	8888
37671	5	3477
28010	9	38142
37302	6	16627
37302	6	21792
37302	6	28211
37302	6	31730
37302	6	1115
37302	6	29015
37302	6	18348
37302	6	17846
37302	6	19798
37302	6	1194
37302	6	217
12824	0	37579
4004	0	38134
14999	5	38149
33017	0	37877
5931	0	37574
25075	0	37877
31436	8	37820
9806	5	38006
37644	10	16832
37644	5	36612
37644	2	23666
37644	5	12814
37644	5	7602
37644	5	2155
37644	5	17979
37644	5	16214
37644	5	8906
37644	5	16963
37644	5	1049
37644	5	14044
37644	5	8255
37644	5	9795
37644	5	15270
37644	5	34023
37644	5	11379
37644	5	17284
37644	5	35302
37644	5	28992
37644	5	6812
37644	5	17336
37644	5	27129
37644	5	22623
37644	5	30828
37644	5	19451
37644	5	24289
37644	5	9534
37644	5	27901
32728	8	37284
17698	1	38079
2445	0	38134
37741	2	11751
21126	8	37381
9585	8	37381
6822	8	37315
20015	0	37943
20901	0	37283
11273	0	37819
4019	0	37666
19599	0	37842
10973	5	37917
38093	2	25197
38093	6	37075
38093	6	32459
21387	0	37786
34301	0	37934
14583	0	37934
122	3	38013
37319	3	21183
20841	8	37381
20841	4	37367
26584	8	37381
22300	5	37815
31034	0	38046
29303	8	37315
29303	1	37844
32434	9	37254
32434	9	37866
37673	0	33173
37673	2	34372
26080	0	37419
7123	0	38170
23869	0	37786
28582	0	37922
2369	3	37944
38058	2	15656
38058	2	4194
25797	3	37714
11587	0	37666
11587	6	37429
1988	0	37361
1988	0	37388
34967	2	37455
34967	2	37393
13791	3	37886
18448	0	37579
4229	0	37368
20518	0	37574
8257	4	37436
6639	0	37713
21941	1	37621
36421	0	37934
31983	1	37387
37341	4	14755
37584	2	22385
37584	2	10912
37584	2	1908
37584	2	20078
37584	2	6872
37584	2	12877
37584	2	30590
37584	2	3651
37584	2	22495
37584	2	23546
37584	2	34565
22750	0	37430
19047	2	37930
27838	2	37444
33160	0	37544
37909	0	9083
37909	2	12959
37909	2	23983
37909	2	29350
592	6	37799
592	6	37927
592	6	37735
100	0	37819
1870	0	37713
28476	0	37628
28310	8	37315
28310	1	37844
18727	0	38055
30481	1	37577
6780	0	38026
4651	1	37727
34816	8	37315
33242	1	37727
25790	2	37708
13826	0	37938
29111	0	37667
1957	2	37424
38056	2	32353
38056	2	28354
38056	2	4709
38056	2	20763
38056	2	27318
38056	2	15838
38056	2	13931
38056	2	14106
14366	0	37934
3196	3	38118
35265	2	37251
30372	8	37315
1087	0	38034
23547	3	37653
10462	1	37727
26302	0	37574
3528	0	37852
19090	2	37272
17055	1	37727
7733	8	37284
10969	1	37368
37523	0	25269
7802	8	37701
7802	10	37889
4211	8	37878
20615	0	37628
37897	0	24465
37897	3	12551
11021	0	37591
9831	0	38052
9193	4	37978
11475	0	37579
33400	0	37877
37830	8	8372
37830	4	19195
37462	7	21765
37462	7	35277
28929	0	37843
1325	0	37628
33952	3	37299
18476	5	37916
37585	0	8387
35847	0	37422
22185	0	37544
37300	2	1622
37300	2	27871
37300	2	3629
1566	3	37690
33618	0	37628
10202	3	37871
7955	0	37534
34197	0	37922
37355	0	4772
34059	0	37666
283	0	37628
24320	1	37561
19457	0	37843
19518	0	37922
36339	0	37852
37842	0	36467
37842	0	8956
37842	2	6999
37842	2	31634
37842	2	14077
37842	2	28850
37842	2	35392
37842	2	692
37842	2	3240
37842	2	263
37842	2	19599
37842	2	32788
37842	2	615
37842	5	6711
25361	5	37800
16219	0	37754
16837	0	37579
25862	8	37315
25862	1	37844
30949	0	37791
38143	3	22628
38143	6	5831
33022	0	37754
17148	8	37284
20286	0	37713
8496	8	37962
12462	2	37271
35304	0	37711
35304	4	37797
20937	0	37713
25890	8	37284
16626	9	37787
16626	2	37821
1283	8	37559
1283	5	38091
1283	5	38114
7178	8	37483
7178	4	37732
27009	0	38161
27009	3	38049
32135	6	37925
5367	0	37713
28448	0	37786
11512	4	37925
1402	0	37934
193	2	37727
33719	2	37774
25770	5	37905
22736	0	38022
11082	0	37713
15652	0	38134
901	5	37426
901	5	37255
38007	0	35476
38007	3	14518
37623	5	33324
37728	2	3238
37728	2	9120
37728	2	36523
37728	2	1541
37728	2	6140
37728	2	29165
37728	2	27582
214	0	37948
6685	0	37922
20678	8	37839
35111	0	38134
17519	0	37579
852	2	37745
11766	9	37910
9964	0	37328
9964	3	37429
14482	2	37285
6964	0	38040
34557	0	37829
24125	0	37579
1728	3	37944
37484	0	7197
37484	2	26345
37484	2	26811
20514	0	37713
35235	0	37590
1187	0	37922
37742	4	32758
23907	0	37934
12234	4	38167
28913	0	37950
21374	0	37579
18738	0	37713
3799	0	37701
2867	3	37457
3400	0	37877
4923	8	37926
2470	1	37368
38177	3	27242
38177	6	8687
9789	1	37387
22674	4	37807
37337	0	28358
37337	0	10445
37337	6	28346
37337	6	22465
37337	6	25816
37337	6	23127
37337	6	17118
976	0	37713
31864	0	37934
36057	0	37534
7260	0	37713
23510	0	38134
35803	0	37922
37381	0	15663
37381	2	11331
37381	2	24809
37381	2	23998
37381	2	21270
37381	2	22664
37381	2	25916
37381	2	17618
37381	2	862
37381	2	24579
37381	2	5806
37381	2	20183
37381	2	3039
37381	2	18726
37381	2	15162
37381	2	25284
37381	2	32725
37381	2	22784
37381	2	2953
37381	2	32014
37381	2	4271
37381	2	15102
37381	2	37193
37381	2	218
37381	2	35362
37381	2	8501
37381	2	19468
37381	2	34037
37381	2	28969
37381	2	10183
37381	2	17724
37381	2	31627
37381	2	17345
37381	2	7175
37381	2	34992
37381	2	32464
37381	2	16041
37381	2	5407
37381	2	20841
37381	2	34307
37381	2	19800
37381	2	30840
37381	2	18718
37381	2	3813
37381	2	19902
37381	2	30718
37381	2	4264
37381	2	10546
37381	2	27452
37381	2	18378
37381	2	19533
37381	2	27323
37381	2	27384
37381	2	32261
37381	2	22766
37381	2	26944
37381	2	921
37381	2	27224
37381	2	20825
37381	2	34567
37381	2	32901
37381	2	21126
37381	2	27261
37381	2	18411
37381	2	32768
37381	2	31236
37381	2	20350
37381	2	80
37381	2	17364
37381	2	11847
37381	2	36308
37381	2	36577
37381	2	5762
37381	2	3723
37381	2	32731
37381	2	1045
37381	2	4940
37381	2	35782
37381	2	16450
37381	2	9788
37381	2	26315
37381	2	24952
37381	2	13669
37381	2	26919
37381	2	27846
37381	2	8473
37381	2	28455
37381	2	36986
37381	2	8507
37381	2	1366
37381	2	9630
37381	2	22066
37381	2	15597
37381	2	34855
37381	2	8669
37381	2	9006
37381	2	22740
37381	2	28077
37381	2	19557
37381	2	10113
37381	2	9585
37381	2	10852
37381	2	26958
37381	2	20389
37381	2	26584
37381	2	26203
37381	2	36777
37381	2	32287
37381	2	5541
37381	2	19421
37381	2	36044
37381	2	16497
37381	2	30432
37381	2	23307
37381	2	32558
37381	2	28214
37381	2	27818
37381	2	7134
37381	2	631
37381	2	12336
37381	2	35775
37381	2	34007
4793	0	37534
22341	0	37604
30311	0	38134
1017	0	37922
23444	8	37902
37946	0	5770
37946	1	1423
25650	0	38026
13982	0	37958
1750	2	37557
1750	2	37784
5479	6	38053
37698	0	1308
35831	0	37922
1491	4	37756
31819	0	38130
19880	0	37832
3497	0	37819
6080	2	37475
9343	0	37999
32758	5	37742
11443	1	37387
31229	4	37556
29769	2	37941
29769	5	37560
6062	0	37829
16849	0	37579
38014	0	31749
38014	2	32037
38014	2	21491
38014	2	34380
38014	2	32118
9703	1	37793
9379	0	37938
9379	3	37487
10445	2	37337
26750	4	37797
24001	1	37387
37441	8	2039
37441	4	22585
37441	5	29436
37441	5	23909
37441	5	27917
37441	5	14242
37441	5	34924
37441	5	8345
37441	5	25817
37441	5	11343
37441	5	14181
37441	5	35314
37441	5	36993
37441	5	19546
37441	5	14260
37441	6	4776
11768	1	37394
17122	0	37540
11109	0	37829
13652	0	37604
30882	0	37544
12758	0	37500
12758	2	37719
12758	2	37649
8136	9	37352
27495	4	37793
23401	1	37727
4106	0	37579
10126	0	37858
27448	0	37713
38172	1	21594
11208	8	37505
22152	3	37480
38105	0	22052
38105	6	24525
38105	6	35415
38105	6	16693
38105	6	19195
38105	6	22391
38105	6	8739
38105	6	20947
38105	6	36500
38105	6	16813
38105	6	14009
27757	3	37405
22087	2	37674
13339	0	37877
9060	0	37628
6018	3	37690
37430	2	36871
37430	2	10510
21070	0	37713
9982	0	37534
1144	6	37970
11380	2	37329
2027	0	37922
27242	6	38177
24600	0	37819
35993	4	37815
3515	9	38066
29777	0	37880
6376	0	37713
30315	0	37544
27115	3	37421
37360	2	7510
28494	1	37387
37689	0	18853
37689	2	28431
31984	8	37565
27939	0	37363
6833	0	37415
37650	2	4488
37650	2	2317
3195	2	37723
3195	2	37346
37808	5	22386
24512	0	37919
24512	0	37561
32755	0	37720
4146	0	38134
17671	0	37819
30705	2	37902
26470	0	37922
18029	2	37648
37890	0	35570
37890	3	13506
24245	0	37877
33298	4	38089
29669	0	37847
22378	8	37839
37382	2	19598
37382	2	4352
37382	2	36650
35591	8	37284
29593	8	37284
9572	0	37666
2428	0	38134
2428	3	37860
14590	0	37500
14590	2	37351
37925	3	32135
37925	6	14606
37668	0	2825
21646	3	37822
37905	0	1020
37905	4	25770
15838	0	38056
2063	0	37786
6888	8	37701
8923	0	37934
1361	1	37727
30410	1	37387
1032	8	37315
1032	1	37844
13316	0	37628
1047	0	37819
37826	0	6732
37826	2	14940
13770	4	38162
37530	8	8372
37530	4	5523
4164	4	38081
4164	1	37561
13567	2	37885
37568	6	19757
37568	6	509
19825	3	37687
15617	0	37628
15451	0	37819
945	6	37762
24264	0	37666
25410	0	37831
25410	6	37855
37678	4	34310
37678	1	23923
37678	5	8094
10974	0	37579
22716	8	37559
22716	5	37271
38156	6	27059
775	0	37666
30402	0	37934
1296	4	37797
8501	8	37381
8058	2	37646
14150	3	37871
33512	0	37544
37556	3	16909
37556	2	2366
37556	5	31229
20461	0	37706
36282	0	37934
27607	2	37917
16453	5	37978
1627	0	37922
6049	0	38023
17062	0	38018
600	0	37296
19010	0	38134
8930	2	37757
37629	6	28749
32298	0	37608
7653	0	37754
8934	0	37500
27997	3	37299
18067	3	37376
16909	0	37843
16909	6	37556
32435	2	37551
12227	3	37986
20947	4	37495
20947	3	38105
20947	5	37707
20947	5	37586
14939	3	37886
28024	2	37444
22221	0	37864
23358	0	37713
31217	8	37505
31217	4	38102
1373	0	37934
1373	3	37665
6486	0	37628
26064	0	37579
34718	0	37666
17722	5	37769
5446	0	38150
26880	8	37559
4752	0	37590
197	0	37544
197	3	37886
7774	0	37713
2737	0	37877
2512	0	37481
2590	0	37544
18220	5	37654
37217	0	37934
34378	0	37993
34378	3	37455
8489	0	37666
106	0	37666
106	6	37418
26033	0	37713
28887	0	37628
37687	6	26041
37687	6	19825
37687	6	36798
37687	6	8516
37687	6	36911
15602	0	37544
980	0	37574
23885	0	37628
20302	0	37534
20302	3	37532
29602	0	37877
30088	2	37701
30166	0	37713
37873	3	16738
27949	0	37819
34988	0	37819
34988	3	37310
14940	0	37826
37422	2	21131
37422	2	35010
37422	2	4434
37422	2	35847
37422	2	26331
37422	2	3106
37422	2	35517
37422	2	10756
37422	2	2112
37422	2	34713
37422	2	14934
37422	2	7892
37422	2	7566
37422	2	25932
37422	2	707
37422	2	7596
37422	2	7000
37422	2	20916
37422	2	16872
16226	0	38134
28577	0	37579
34792	2	37971
36898	1	37844
23146	0	38026
29941	1	37727
37420	0	33899
37420	6	16567
37420	6	26042
12739	3	37871
14509	0	37666
12649	0	37544
5323	8	37483
28934	0	37544
28934	3	37886
27223	0	37666
25754	0	38134
31623	0	38134
38071	0	14173
38071	4	19681
8972	0	38161
17423	4	37270
36666	3	37651
32263	3	37299
32263	2	37274
4936	2	38022
38020	0	36895
30309	0	37880
10722	4	37732
10722	3	37772
38099	0	5269
89	1	38140
13697	0	38040
27684	0	37713
22429	8	37926
3079	3	37299
37263	0	17607
37263	2	23249
37557	0	24377
37557	5	10994
37557	2	11245
8779	0	37934
13102	0	37713
3428	0	37260
20492	0	37534
35298	0	37914
9652	2	37743
34752	0	37713
22256	0	37574
27611	2	38084
24222	0	38134
37317	5	31423
37317	5	29449
37317	5	32901
37317	5	30198
37317	5	11871
37317	5	21186
18789	8	37483
25817	4	37441
29362	0	37934
37438	0	33701
37438	6	33554
6181	1	37727
2910	8	37284
34819	3	37299
17575	0	37938
17575	3	37487
16580	0	37544
13740	0	37819
13740	3	37310
5819	0	37852
29350	0	37909
29350	2	37385
27575	0	37934
12911	0	37579
15465	0	37544
30961	0	37922
37869	4	17789
16999	3	37625
23820	5	37764
23820	5	37937
17230	0	37819
19634	2	37688
4866	2	37605
19293	3	38065
32927	6	37440
10481	8	37315
10481	1	37844
28172	0	37843
17070	8	37716
32732	0	37947
20289	0	37544
5154	0	37666
23018	0	38084
37541	0	16150
24454	2	37679
6134	0	38026
30120	0	37877
27627	8	37483
38005	3	36575
38005	6	28947
28535	0	37574
5883	0	37922
37766	3	32011
38059	0	20244
26323	4	38102
38054	0	32529
14863	0	37844
14863	1	37844
15655	3	37432
8292	0	37786
37695	3	13149
37695	6	16954
30569	0	37442
25917	3	38118
15979	0	37877
4228	0	37579
21944	9	38069
24952	8	37381
15412	4	37891
9868	0	37754
9868	6	37669
13057	0	37835
3277	2	38020
22306	0	37574
29130	0	38134
22575	2	38139
18213	1	37577
25222	0	37265
37694	2	32177
8016	0	37485
8016	5	37790
30262	8	37483
1291	0	37666
37470	0	3216
37470	2	27447
37470	2	6465
37470	2	29897
37470	2	2854
24366	8	37559
3623	0	37579
37240	0	14208
37240	3	35643
37240	6	13573
19520	0	37934
21950	8	37565
21950	4	37793
36969	1	37561
30496	0	37877
22465	3	37337
36065	0	37463
10130	0	37990
13456	0	37877
6396	0	37579
30233	0	38134
30233	3	37860
38070	0	31660
23334	0	37579
9795	4	37644
38019	0	19571
38019	2	1063
38140	0	7640
38140	9	3346
38140	9	4735
38140	9	12754
38140	9	13635
38140	2	17243
38140	2	27005
38140	2	26892
38140	2	36974
38140	2	35895
38140	9	28726
38140	9	35175
38140	9	14690
38140	9	34149
38140	9	18529
38140	9	29384
38140	9	11548
38140	9	35101
38140	9	12631
38140	9	36436
38140	9	35751
38140	9	27074
38140	9	27230
38140	9	11763
38140	9	19850
38140	9	6951
38140	9	22750
38140	9	29104
38140	9	4925
38140	9	14752
38140	9	33277
38140	9	16190
38140	9	25216
38140	9	27030
38140	9	33735
38140	9	32214
38140	9	19410
38140	9	12146
38140	9	33907
38140	9	20554
38140	9	25960
38140	9	89
38140	9	12532
38140	9	17129
38140	9	475
37822	5	7334
37822	5	28238
37822	6	24616
37822	6	16693
37822	6	19195
37822	6	21646
37822	6	33682
37822	6	8739
37822	6	36500
37822	6	28342
37822	6	16813
37822	6	5548
37822	6	10331
29439	0	37951
20796	0	38040
14002	1	37844
7068	1	37844
6402	0	38126
26577	0	37754
32069	0	37934
37344	0	19747
37344	2	25729
16892	0	37461
18907	3	37509
31730	3	37302
26597	0	37544
26597	3	37886
925	0	38026
4168	3	38104
8682	0	38040
7463	0	37754
23983	0	37909
35865	0	38026
430	0	37713
19524	0	37314
20270	6	37876
32733	4	38089
24421	0	37819
36020	0	37300
33279	8	37565
2465	0	37553
37421	0	28358
37421	6	15007
37421	6	27115
37421	6	34809
8949	0	37598
15723	0	37922
33299	0	38040
13451	0	37922
13451	2	37789
13451	2	37987
24005	0	37544
24005	3	37886
35419	8	37559
25367	2	37580
32045	1	37387
26476	0	37544
37820	2	6077
37820	2	13665
37820	2	2079
37820	2	14082
37820	2	31183
37820	2	476
37820	2	4594
37820	2	27941
37820	2	35144
37820	2	11307
37820	2	5790
37820	2	3911
37820	2	29479
37820	2	19255
37820	2	15068
37820	2	6799
37820	2	29419
37820	2	31436
37820	2	25092
37820	2	30499
37820	2	23374
37820	2	22973
18899	0	37544
18899	3	37886
22161	0	38026
32718	0	37922
4097	0	38046
20478	4	38089
6347	0	37626
4063	0	37819
8087	0	37877
27871	0	37300
10721	0	37389
37082	0	37574
16294	0	37666
35470	0	37713
23414	3	37293
37453	0	20198
26489	0	37843
9676	8	37483
9676	4	38089
35932	0	37877
8989	8	37483
8989	4	37732
22180	0	37666
12578	5	38038
31182	0	37713
26385	8	37315
38175	4	28965
38175	2	36198
38175	2	17024
37961	0	6276
38035	6	11642
16604	4	37694
37900	5	35822
10061	0	38134
29731	0	37380
37565	2	25020
3367	1	37727
22719	0	37544
22719	3	37886
11000	6	37843
11000	6	37754
11000	6	37934
11000	6	37260
11000	6	38134
24963	0	38134
24963	3	37792
38171	0	511
38171	3	13984
17926	8	37559
23226	0	37843
10401	3	37860
20350	8	37381
27746	8	37284
8928	0	37819
26160	0	37544
15304	0	37713
11407	0	37535
14768	0	37448
33352	3	37669
13653	0	38100
5868	8	37716
33326	0	37934
14406	5	37538
9644	0	37713
235	1	37561
31172	0	37544
31172	3	37886
9176	0	37491
19647	6	37628
31906	0	37689
37265	0	25566
37265	2	11614
37265	2	15265
37265	2	4901
37265	2	10725
37265	2	9863
37265	2	25222
37265	2	32874
37265	2	9247
37265	2	29845
37265	2	9275
37265	2	17952
37265	2	18814
37265	2	14673
37265	2	12794
37265	2	34221
37265	2	12987
37265	2	5858
37265	2	1879
37265	2	28931
37265	2	1066
37265	2	14929
37265	2	27703
37265	2	32844
37265	2	33761
37265	2	33819
37265	2	5940
37265	2	33614
10248	1	37727
22119	8	37315
22119	1	37844
3673	0	37608
16894	0	37922
26055	0	37305
17271	0	37922
32015	0	37534
15627	0	37934
38041	3	36542
38041	6	558
15167	1	37486
8798	0	37540
37960	0	15158
37960	2	10136
24753	4	38033
9438	0	37754
10568	0	37260
11846	0	37628
38111	3	10829
38111	2	2251
38111	2	31702
38111	2	18884
38111	2	27760
38111	2	20082
38111	2	4937
38029	6	7511
37454	0	18528
37685	0	22807
37685	3	2364
37924	0	25835
37924	4	3458
37924	2	259
37549	3	18574
37549	6	18028
37549	6	32158
37549	6	23190
37549	6	14465
37549	6	27664
35681	0	38134
35681	6	37959
36643	0	37922
15552	0	37540
33606	0	37574
19266	0	37922
17220	0	37579
751	4	37794
1676	0	37628
7002	0	37628
27545	0	37786
3644	0	37666
32558	8	37381
6723	0	37877
3871	0	37819
30692	0	38134
30692	3	37860
27377	0	37934
31119	3	37299
28057	0	38040
16242	0	37754
38150	0	33795
38150	2	5446
38150	5	29359
38150	2	36070
38150	2	5102
38150	2	33200
38150	2	5248
38150	2	34161
38150	2	1912
38150	2	18659
38150	2	14251
5382	2	37809
2185	0	37284
9065	0	38120
15040	0	37867
16948	8	37716
11971	0	37628
8968	1	37727
31437	4	37925
8096	0	38026
24525	3	38105
2592	0	37666
37457	4	22470
37457	3	24093
37457	5	21550
37457	5	772
37457	6	2867
2307	0	37534
11350	6	37550
16847	0	37877
7493	0	37713
3834	0	37922
3246	0	37829
37845	6	29030
37845	6	10287
37845	6	7726
37845	6	11098
25631	0	38050
26308	0	37706
33597	0	37398
37563	0	22657
37563	3	36652
8472	2	37859
14280	0	37534
14280	3	37596
11448	1	37387
34587	0	37922
35780	0	37831
36993	8	37926
36993	4	37441
10017	0	37713
4777	0	37844
4777	1	37844
37696	2	26484
37696	2	3354
37696	2	36739
37696	2	25157
37696	2	14337
37524	0	2383
3301	0	37880
2268	0	37922
37424	0	15226
37469	2	13918
37469	2	547
34181	0	37922
23757	0	38097
7483	0	37934
13738	4	37732
13738	3	37772
10152	1	37844
37701	0	30088
37701	2	19204
37701	6	25282
37701	5	6443
37701	5	7187
37701	2	3799
37701	6	24658
37701	2	2716
37701	2	20736
37701	2	13739
37701	2	916
37701	2	11145
37701	2	6359
37701	2	6262
37701	2	21552
37701	2	6888
37701	2	31435
37701	2	24360
37701	2	15098
37701	2	10830
37701	2	14620
37701	2	21524
37701	2	1071
37701	2	23726
37701	2	31878
37701	2	4322
37701	2	8714
37701	2	7643
37701	2	7802
37701	2	2732
37701	2	10015
37701	2	3885
37701	2	3927
37701	2	22519
37701	2	37103
37701	2	4280
2770	0	37934
15274	2	37777
15274	2	37997
24705	8	37926
34071	0	37754
12194	0	37922
38123	7	6302
36308	8	37381
35608	0	37877
25847	0	38164
37885	0	13567
37885	3	12826
38027	6	31455
16813	3	38105
16813	3	37822
37272	0	19090
37272	3	13821
28398	0	37754
36162	2	38178
18383	0	37500
31341	2	37368
37910	0	16426
37910	1	11766
37776	7	13561
2391	0	37579
23703	0	37877
16518	0	37801
16518	2	38120
8183	8	37559
8183	3	37768
13521	0	37877
23036	0	37544
37293	0	19211
37293	3	22866
37293	6	30991
37293	6	9711
37293	6	26366
37293	6	22449
37293	6	376
37293	6	1719
37293	6	23414
37293	6	13452
37293	6	11389
37293	6	21517
37293	6	9793
37293	6	32062
37293	6	9621
37293	6	11014
37293	2	23733
37293	6	16253
37293	6	31087
37293	6	10491
37293	6	1734
37293	6	22031
37293	6	2092
37405	0	28358
37405	3	2568
37405	6	27757
7415	3	37299
23379	0	37579
32969	0	37819
20754	0	37713
37733	0	32721
7387	4	38126
12850	0	37666
37262	6	2604
20265	0	37579
28506	0	37877
2721	0	37713
24306	0	37388
24874	4	37964
31529	0	37574
9658	3	37413
30761	4	37793
28920	0	37713
16599	0	37706
2606	9	37974
2606	9	38062
2606	9	37708
2606	9	37298
2606	9	37308
2606	9	38174
2606	9	37879
2606	9	37965
12901	3	37918
21506	3	37299
24656	0	37579
11469	0	37713
7154	0	37500
14045	8	37284
37744	2	31527
33748	0	37754
13540	4	37449
7452	0	37706
22808	8	37505
15873	0	37308
15873	6	38070
28011	8	37559
28011	5	37330
35036	8	37839
19380	0	37579
13210	4	37316
12551	0	38040
12551	6	37897
12517	2	37883
33783	8	37315
33783	1	37844
17748	2	37786
37343	0	22349
37799	0	28358
37799	3	592
37991	4	10331
37991	5	32727
37991	5	33272
37991	10	21408
37991	10	2547
2904	0	37500
35643	6	37240
3512	1	37727
28311	0	38043
10830	8	37701
19774	8	37284
31472	2	38142
23017	0	37934
10690	8	37505
10948	0	37713
37972	2	3704
14147	0	37711
28486	8	37315
28486	1	37844
17898	5	37270
30359	0	37713
17680	0	37877
8333	8	37701
35859	0	38159
37495	10	14727
37495	10	33509
37495	10	13413
37495	10	31995
37495	10	14739
37495	10	32268
37495	10	17121
37495	5	19727
37495	2	36751
37495	5	20947
37495	10	22235
37495	10	10655
37495	10	25665
37495	10	3777
37495	10	36934
37495	10	26088
37495	10	24049
37495	10	31848
37495	10	6353
37495	10	22075
37495	10	15816
37495	10	7889
37495	6	11058
37495	6	6128
37495	10	32611
37495	10	33584
29651	0	38127
24349	0	37922
37238	4	15067
35408	0	37544
7292	1	37561
15176	0	37713
26379	6	38096
14219	1	37486
29521	0	37666
28017	0	37922
24826	0	37579
10635	0	38134
31974	0	38040
25959	1	37436
28797	0	37786
26041	0	37831
26041	3	37687
7466	0	37922
26184	4	37275
9296	3	37871
15824	0	37877
21738	0	37713
10311	4	37794
10311	1	37387
31423	4	37317
9088	0	37628
4294	0	38026
31803	4	37891
37913	2	36263
37913	2	36627
3078	0	37934
17699	3	38017
24343	0	37544
24343	3	37886
11720	0	37706
31238	8	37926
22228	3	37299
21982	0	37877
13951	0	37922
6204	0	38134
6204	3	37246
5808	0	38134
12671	2	37628
34886	0	37877
29797	1	37486
37902	0	30705
37902	2	19345
37902	2	15574
37902	2	21456
37902	2	36083
37902	2	44
37902	2	33030
37902	2	15029
37902	2	32162
37902	2	13788
37902	2	9595
37902	2	30855
37902	2	36611
37902	2	35625
37902	2	30054
37902	2	7010
37902	2	16388
37902	2	29938
37902	2	5436
37902	2	13129
37902	2	3006
37902	2	8230
37902	2	1752
37902	2	34706
37902	2	33950
37902	2	24885
37902	2	11302
37902	2	11343
37902	2	16214
37902	2	14497
37902	2	11817
37902	2	35760
37902	2	13546
37902	2	21431
37902	2	7026
37902	2	31200
37902	2	36342
37902	2	23444
10838	5	38091
37995	0	1664
6836	0	37922
19476	0	37922
29871	0	37922
37502	0	12400
37502	4	310
37502	5	36188
37502	5	1783
37502	5	20266
37502	2	31714
3163	0	37877
22947	0	37481
37877	2	24052
37877	2	21882
37877	2	36062
37877	2	15096
37877	2	7344
37877	2	27507
37877	2	35029
37877	2	2218
37877	2	32865
37877	2	567
37877	2	34005
37877	2	24858
37877	2	18831
37877	2	32921
37877	2	20466
37877	2	25232
37877	2	24245
37877	2	6723
37877	2	4199
37877	2	23798
37877	2	25676
37877	2	14562
37877	2	29727
37877	2	8285
37877	2	24382
37877	2	5929
37877	2	7959
37877	2	15661
37877	2	24268
37877	2	8498
37877	2	13456
37877	2	14986
37877	2	9679
37877	2	35385
37877	2	5575
37877	2	27300
37877	2	29602
37877	2	25075
37877	2	3308
37877	2	811
37877	2	35321
37877	2	30578
37877	2	25294
37877	2	34529
37877	2	13339
37877	2	23703
37877	2	30681
37877	2	21871
37877	2	12938
37877	2	25158
37877	2	7552
37877	2	15799
37877	2	30120
37877	2	14830
37877	2	3163
37877	2	28956
37877	2	8087
37877	2	30409
37877	2	16822
37877	2	35221
37877	2	32393
37877	2	34886
37877	2	6237
37877	2	10872
37877	2	33017
37877	2	13521
37877	2	25239
37877	2	21449
37877	2	6619
37877	2	16681
37877	2	17680
37877	2	16726
37877	2	1674
37877	2	15824
37877	2	33210
37877	2	18397
37877	2	22250
37877	2	8095
37877	2	20934
37877	2	2991
37877	2	32091
37877	2	6123
37877	2	1934
37877	2	18071
37877	2	32379
37877	2	17485
37877	2	35608
37877	2	11980
37877	2	33063
37877	2	4614
37877	2	25571
37877	2	31942
37877	2	6768
37877	2	9512
37877	2	28506
37877	2	27921
37877	2	2930
37877	2	34251
37877	2	22162
37877	2	15086
37877	2	24183
37877	2	24690
37877	2	28033
37877	2	7128
37877	2	15979
37877	2	33137
37877	2	20200
37877	2	8697
37877	2	24062
37877	2	19473
37877	2	20538
37877	2	36550
37877	2	1260
37877	2	13267
37877	2	3400
37877	2	32139
37877	2	18886
37877	2	35183
37877	2	12075
37877	2	4390
37877	2	4565
37877	2	18663
37877	2	33764
37877	2	10272
37877	2	20509
37877	2	6317
37877	2	32320
37877	2	21982
37877	2	33208
37877	2	917
37877	2	34332
37877	2	9702
37877	2	33332
37877	2	4900
37877	2	34218
37877	2	28265
37877	2	30156
37877	2	18635
37877	2	31659
37877	2	32271
37877	2	35952
37877	2	15150
37877	2	290
37877	2	2737
37877	2	8534
37877	2	22037
37877	2	29257
37877	2	34165
37877	2	21597
37877	2	15609
37877	2	27867
37877	2	1520
37877	2	35932
37877	2	10099
37877	2	16847
37877	2	32451
37877	2	20787
37877	2	27250
37877	2	21315
37877	2	32511
37877	2	30044
37877	2	34638
37877	2	14969
37877	2	4017
37877	2	15493
37877	2	24427
37877	2	10435
37877	2	19228
37877	2	19791
37877	2	30496
37877	2	33400
37877	2	19667
37342	0	32184
37342	3	22730
1660	3	37299
2732	8	37701
15133	0	37608
7928	0	37934
37766	0	16627
24025	0	38134
22305	0	38134
22449	0	37544
22449	3	37293
29104	1	38140
20732	0	37922
24248	0	37544
23440	2	37892
10435	0	37877
29173	0	37579
37756	8	20736
37756	3	24249
37756	5	25902
37756	5	22432
37756	5	23186
37756	5	1491
37756	5	1413
37756	5	25667
37756	5	10546
37756	5	1440
37756	5	24187
37756	5	25872
37756	5	34828
37756	5	2305
37756	5	27812
37756	5	23041
37756	5	5038
37756	5	12723
37756	5	4734
37756	5	20161
37756	5	26545
37756	5	4857
37756	5	13189
37756	5	11027
37757	0	8930
37757	4	21368
22386	4	37808
3485	0	38134
14574	8	37284
12788	0	37579
19876	1	37727
11642	3	38035
4444	8	37483
37298	0	15748
37298	1	2606
863	6	37603
19576	0	37706
33487	0	38040
8463	0	37713
10504	0	37500
16327	0	37483
35455	2	37288
5306	0	37934
31594	0	37500
25173	4	37434
37179	5	37917
552	2	37334
37410	3	30876
37410	6	18449
9567	8	37284
8942	0	37819
10710	0	37481
37697	3	4076
12472	0	37574
22730	6	37342
25159	0	37993
9914	0	37338
18323	0	37544
8484	0	38134
37295	0	35707
10934	0	38040
36882	0	37922
12760	0	37534
27057	0	38033
37527	6	14272
37630	6	25496
37630	6	1147
35415	3	38105
35415	6	38030
15623	3	38118
7000	0	37422
15282	2	37722
15282	2	38168
15282	2	38116
15282	2	38037
5105	0	37437
20826	0	37544
20826	3	37886
26573	0	37702
34384	0	37975
37385	8	5439
16513	0	37934
34667	2	37992
593	8	37315
593	1	37844
33841	0	37922
37916	8	24789
37916	4	18476
20638	0	37819
30970	0	37819
29942	0	37357
20374	1	37727
13614	0	37713
37428	2	16734
37428	2	6826
37428	2	32472
37428	2	25941
37428	2	30255
37428	2	26023
37428	2	11091
24149	1	37844
11379	4	37644
35827	0	37713
26341	6	38085
29519	0	37843
24214	0	37294
10287	3	37845
5636	0	38046
16977	1	37727
9027	0	37713
36536	1	38079
14402	1	37727
16287	0	37359
26345	8	37484
36530	1	37368
26350	1	37387
23190	3	37549
32228	8	37565
22669	2	37981
30043	1	37621
34576	0	37713
25808	8	37315
25808	1	37844
5171	4	37674
3308	0	37877
17258	2	37791
9330	0	37579
31265	2	37585
5904	0	37934
35738	1	37561
33019	0	37534
34275	0	37922
11163	0	37574
37626	0	31854
37626	1	11838
37626	2	31231
37626	2	13117
37626	2	29352
37626	2	1758
37626	2	6347
37626	2	9428
37626	2	7238
37626	2	18002
37626	2	923
37626	2	16130
37626	2	15032
37626	2	8481
10889	0	37922
17734	0	37369
327	0	38046
4217	0	37922
13454	0	37934
38139	7	10088
757	0	37534
757	3	37256
9201	4	37732
9201	5	38003
31634	0	37842
24031	1	37387
34888	1	37561
37446	0	7502
37446	3	29382
37979	5	10550
37718	3	9900
5096	3	37514
16564	0	37843
3130	8	37559
14272	3	37527
28110	0	37843
2942	0	37666
21908	9	37952
22107	0	37922
24393	0	37419
30462	0	37934
31507	0	37922
21449	0	37877
24831	0	37713
1484	0	37852
14886	0	37544
36673	0	37712
38022	0	4936
38022	2	15474
38022	2	24452
38022	2	20168
38022	2	30161
38022	2	24107
38022	2	22736
38022	2	3422
38022	2	17116
38022	2	32429
38022	2	18894
38022	2	21872
21282	0	37544
7968	4	37269
29042	1	37387
33992	1	37621
38170	2	32962
38170	2	7123
37581	0	15130
37360	0	26854
3885	8	37701
25888	0	37922
28791	0	37699
1972	3	37393
22284	0	37970
22331	0	37579
18472	0	37628
31664	1	37727
24270	0	37786
27204	0	37922
10158	8	37464
37529	0	25672
37529	9	9202
37529	9	11972
37529	9	25985
37529	9	21969
37529	9	15126
33572	0	38134
21847	0	37260
17214	4	38115
12847	8	37315
12847	1	37844
31473	0	37579
6169	0	37666
27952	0	37534
20777	0	37819
3655	0	38134
11974	0	38046
15658	8	37483
21115	3	37362
25560	0	37574
17958	3	38118
8858	0	37534
8491	1	37844
34589	1	37368
19302	0	38155
3354	0	37696
3354	4	37674
18667	0	37574
14041	8	37505
30654	8	37915
37709	2	27711
37709	2	24835
7506	0	38115
37758	0	35432
[truncated: 13,277 more rows]
