# Supplementary material
Source: ML conference proceedings conference paper supplement (https://proceedings.neurips.cc/paper_files/paper/2021/hash/0fd600c953cde8121262e322ef09f70e-Abstract.html)
Supplement: Supplementary file 1 [file 0fd600c953cde8121262e322ef09f70e-Supplemental.zip › Supplementary_Material_Paper_8745/data/Hamaguchi-BM_tail-1000/train/train.txt]

27989	0	12435
27989	1	1635
26176	0	9709
26176	2	36269
4550	0	18873
4550	2	26922
30032	3	5664
33379	0	12779
6769	0	16274
6769	2	17109
13986	0	6413
36828	0	16713
36828	3	8994
32167	0	29899
32167	2	17673
32167	2	36355
32167	2	29580
32167	2	19847
32167	2	5703
11691	3	14735
11691	6	28747
32005	0	14312
32005	2	6297
32005	2	21595
32005	2	32622
32005	2	17346
32005	2	33835
6461	0	1479
6461	3	18196
18920	0	6887
18920	3	28698
1703	7	34631
29184	0	11635
29184	3	11301
29184	5	5757
11890	4	3458
11890	4	32695
11890	4	18564
11890	2	2464
6804	4	2732
3541	0	26765
3541	2	6238
3541	2	2691
3541	2	12110
3541	2	17938
3541	5	28656
3541	2	16917
3541	2	14733
3541	5	16428
3541	2	35784
3541	2	24447
3541	2	2152
3541	2	26081
3541	2	893
25450	0	262
25450	2	24932
10769	4	35057
10769	5	14949
12495	0	5299
12495	2	33220
21307	0	36574
841	3	27227
36291	8	24789
36291	4	24762
23682	0	21651
23682	3	9719
25213	3	6634
34103	0	29934
34103	3	33374
17221	0	28358
17221	6	30700
33768	0	3216
33768	2	6617
10798	3	36357
10798	6	22692
11632	0	20920
11632	2	12741
30025	3	3013
30025	6	32397
15749	0	3563
15749	4	32591
33026	0	954
33026	2	28505
24437	0	5687
8793	8	3440
8793	8	11597
31416	0	14883
31416	4	5750
648	3	18874
648	6	24959
648	6	13369
6604	0	35950
33650	0	2712
12646	8	15282
12646	4	31688
25795	3	16048
25795	5	28491
4337	0	4405
4337	2	23162
17104	0	3847
17104	2	2333
3506	2	33911
3506	2	22466
3506	2	27774
3506	2	18661
3506	2	2076
3506	2	11670
3506	2	18625
3506	2	29207
3506	2	23973
3506	2	6009
3506	2	16711
3506	2	482
3506	2	6744
3506	2	4327
3506	2	15644
3506	2	26061
3506	2	11721
28973	0	5369
28973	3	24554
17902	0	33701
17902	3	23412
17902	6	15446
17902	6	31227
1633	7	13219
15193	0	15159
15193	3	4695
1359	0	36837
1359	3	29403
1359	6	27479
32811	0	2664
32811	1	23923
22290	2	28998
32691	0	19227
32691	3	12641
4261	2	22691
4261	2	14459
4261	2	2886
7531	2	756
11312	3	33825
32683	2	6605
32683	2	24370
32683	2	32753
29621	0	5362
29621	2	13746
29621	2	36280
29621	2	24733
29621	2	1150
5726	2	1472
3168	0	9188
8778	0	14208
8778	3	30753
8778	6	25527
32197	0	27859
32197	5	20688
3938	0	25063
3938	1	23602
26860	6	25929
26860	6	603
26860	6	35278
26860	6	20050
26860	6	33186
27586	0	10031
27586	1	26154
11039	3	12160
14071	0	9827
14071	3	29087
2559	1	34544
24533	8	2379
24533	4	6286
23675	3	28445
23675	2	24018
23675	2	25674
23675	2	11823
8145	0	22807
8145	3	9434
26534	0	1619
26534	4	10028
28010	9	27259
28010	9	2852
28010	9	5275
28010	9	12269
28010	9	23283
28010	9	25574
28010	9	31054
23142	0	18526
12824	3	23381
12824	6	23458
2790	2	12326
2790	2	19705
2790	2	25096
2790	2	20691
2790	2	19045
29827	0	2653
29827	1	23923
4004	3	12918
14999	5	8636
14999	5	26885
8540	0	12318
8540	2	4993
31674	0	18790
10510	2	22380
3562	0	27340
3562	3	9997
3872	0	16250
3872	2	26915
3872	2	23106
1117	5	14041
1117	5	25497
1117	5	1196
1117	5	1755
1117	5	10266
18354	0	22001
28225	0	353
28225	5	3816
28225	2	36572
5931	3	28339
25075	3	2897
17753	0	32957
31436	4	5278
31436	4	24360
31436	5	22202
15527	0	28658
15527	3	27369
34957	0	13030
34957	0	1549
8198	0	9530
24142	0	19578
32986	0	31093
32986	1	2606
9806	0	34607
9806	2	28178
9806	2	6745
9806	2	21094
9806	2	6086
2325	0	3480
2325	0	28774
16311	7	24619
16311	7	11964
30298	0	11044
30298	4	20718
30298	2	23344
30298	2	21644
30298	2	4889
30298	2	1426
27674	5	10189
22593	0	32668
22593	1	6696
26896	0	12854
13957	0	20814
13957	3	17377
13957	2	14992
13957	2	19853
26051	8	24658
26051	4	12578
999	0	23705
999	2	2324
999	2	28750
31036	0	33353
31036	4	22300
19196	0	29074
19196	2	10566
19196	2	5759
19196	2	27453
19196	2	23653
32728	4	3601
2083	0	3727
2083	5	28497
1708	0	31195
1708	4	32528
21737	0	5329
37105	0	14424
37105	2	13481
37105	2	9085
17698	0	9079
36772	0	36219
36772	3	15540
29565	0	1738
29565	5	34235
35248	0	23145
16265	0	34858
16265	3	8837
12597	0	17381
12597	2	12141
2445	6	30579
4749	0	22807
4749	3	30458
35739	0	14068
35739	2	34187
36677	0	7336
36677	0	1030
36677	2	7346
9431	0	26093
21126	8	8372
21126	4	18344
19273	2	23262
19273	2	25979
17647	6	2401
15395	3	25842
15395	6	10333
21655	0	37160
21655	3	4076
11273	3	10520
4019	3	21582
19599	2	30406
607	0	31232
27208	0	22262
27208	6	35605
27208	9	14971
33363	0	22807
33363	3	17551
35353	0	22016
35353	1	11619
1722	0	11810
1722	3	7178
10973	2	31333
10973	2	8406
10973	2	33341
10973	2	27752
10973	2	2703
10973	2	16703
10973	5	34327
10973	5	34514
10973	2	9837
12409	0	35252
12409	2	21350
24073	0	6350
24073	1	2606
21387	2	21760
21387	2	470
21387	2	19983
21387	2	8375
21387	2	17166
21387	2	8691
21387	2	3254
21387	2	30379
21387	2	30622
21387	2	30322
26440	0	2512
26440	3	4106
33254	0	35392
16134	0	23470
17161	0	1655
17161	2	35143
17161	2	4134
36202	3	27242
36202	6	34863
26622	5	13461
27634	2	4956
3712	0	3833
3712	2	4249
36477	2	23175
18965	0	17229
18965	5	20771
34301	6	15654
18641	0	11126
14583	6	14079
36865	0	22954
36865	2	11132
15079	0	1622
122	6	33774
27274	0	27639
27274	3	18272
29216	8	15582
29216	4	24065
2629	0	6474
2629	2	15103
2629	2	29381
23417	7	1224
23417	1	22498
20990	0	3087
10897	1	11838
31624	0	34683
31624	2	6020
29563	0	22329
31475	4	30333
31475	4	24709
31475	2	31810
31475	2	13231
31475	2	35639
31475	2	10292
31475	2	26507
31475	2	12051
7711	2	35007
6445	2	16145
28978	0	25906
28978	2	25946
36170	0	28717
36170	4	20208
20841	8	8372
17426	0	4206
16466	0	31606
26584	8	8372
26584	4	5548
16470	7	9696
16470	1	11766
36847	0	7876
22300	0	33353
22300	4	35057
22300	5	2284
22300	5	29389
22300	5	11652
22300	5	31036
22300	5	31761
22300	5	548
22300	5	33658
16261	0	6532
16261	2	32378
19039	0	26548
19039	4	27546
19039	2	2541
2002	8	24789
2002	4	10836
6503	2	12849
22196	0	30577
8905	8	14746
8905	1	20654
37106	0	28358
37106	3	592
37106	6	23562
37106	6	18700
37106	6	34688
20218	0	31565
20218	3	34108
29580	8	32167
29580	8	31347
31034	3	9573
31034	6	18358
32694	0	16013
17668	0	11727
17668	2	4298
37220	8	13796
37220	8	35265
10937	4	21646
10937	5	16891
23747	0	2362
23747	5	13609
12297	0	7609
12297	2	25694
12297	2	28638
17098	0	22304
17098	4	28448
25794	0	19440
25794	2	6740
14259	0	21863
14259	4	23070
32434	9	25958
32434	9	27239
32434	9	19424
32434	9	15374
32434	9	10218
32434	9	19796
32434	9	14057
32434	9	34438
32434	9	24508
32434	9	8943
32434	9	26356
32434	9	8349
32434	9	18860
32434	9	28949
32434	9	26915
32434	9	26579
32434	9	36106
32434	9	29754
32434	9	36153
32434	9	29400
32434	9	33720
32434	9	33727
32434	9	22211
32434	9	2810
32434	9	22956
32434	9	33915
32434	9	36752
32434	9	19290
32434	9	13725
32434	9	33163
32434	9	22620
32434	9	29018
32434	9	6919
32434	9	28519
32434	9	24002
32434	9	16243
32434	9	22912
32434	9	16358
32434	9	23144
32434	9	31375
32434	9	3426
32434	9	2205
32434	2	22224
32434	9	32314
32434	9	34098
32434	9	4345
32434	9	30123
32434	9	943
32434	9	15835
32434	9	4543
32434	9	9364
32434	9	17513
32434	9	14551
32434	9	27068
32434	9	19241
32434	9	27786
32434	9	17995
32434	9	32138
32434	9	10044
32434	9	36176
32434	9	25658
32434	9	25281
32434	9	6998
32434	9	13230
32434	9	33749
32434	9	25088
32434	9	10033
32434	9	15317
32434	9	12055
32434	9	23285
32434	9	35799
36890	0	689
6789	0	23611
7797	0	28007
5539	0	3988
26080	3	31168
15123	2	19119
15123	2	29090
9535	0	36614
9535	5	12471
9535	2	22073
9535	2	27931
9535	2	18795
9535	2	15581
9535	2	30293
9535	2	13079
9535	2	1636
9535	2	8339
9535	2	9850
8599	0	16659
19510	0	1969
19510	3	14772
36563	3	23733
36563	2	26921
27331	0	9918
8480	0	36837
8480	3	26050
8480	6	23941
8480	6	33257
8480	6	30447
8480	6	19740
8480	6	410
8480	6	779
8480	6	3489
8480	6	36394
8480	6	18296
8480	6	12529
8480	6	36281
8480	6	13031
8480	6	10263
29987	0	5031
29987	0	24039
29987	2	19245
29987	2	29198
31104	3	25397
30217	0	15072
17334	0	2712
17334	2	30597
25723	4	28718
25723	5	19063
25723	5	1815
25723	5	5841
25723	5	10766
25723	5	31012
25723	5	27495
7123	4	23326
7123	4	25309
17558	0	1308
17558	3	14457
15217	6	35742
34274	0	8866
34274	2	19059
23869	4	22379
16784	0	19083
16784	4	33151
3507	0	14173
3507	2	15762
28582	2	28102
3352	0	2948
17520	0	31429
17520	2	28688
23652	1	2244
18603	0	7640
2369	6	35014
32849	2	28061
32849	2	2221
25797	0	16477
7101	7	30478
22825	0	9119
261	0	25965
261	2	35758
261	5	7468
261	2	946
11587	6	20284
11587	6	5322
11587	6	31415
4751	0	25220
4751	1	21594
23862	8	33480
23862	8	13796
8261	0	17196
8261	2	25545
17825	6	37097
17825	6	21468
9069	0	27932
9069	2	13562
14447	4	14447
14447	5	29635
34967	0	25566
34967	3	20873
34967	2	24504
34967	2	10373
34967	2	11858
34967	2	20264
34967	2	18404
34967	2	13998
34967	2	2979
34967	2	15531
34967	2	9558
34967	2	10262
34967	2	30207
34967	2	24882
34967	2	26522
34967	2	29562
34967	2	3962
34967	2	18705
34967	2	25484
34967	2	4260
34967	2	5664
34967	2	28915
34967	2	13548
34967	2	13266
34967	2	3995
34967	2	30860
34967	2	32374
34967	2	18196
34967	2	29617
34967	2	26619
34967	2	33752
34967	2	2098
34967	2	34280
34967	2	36992
34967	2	34722
34967	2	35668
34967	2	30208
34967	2	18898
34967	2	32485
34967	2	36734
34967	2	398
34967	2	24887
34967	2	6821
13791	6	27661
23342	0	25243
17163	0	22807
28328	3	31075
28328	6	17339
28328	6	5938
28328	6	37067
28328	6	19254
28328	6	6481
28328	6	26970
28328	6	32977
28328	6	16226
28328	6	18947
28328	6	3003
27644	0	23469
17954	0	2470
12271	0	6255
12271	2	26039
12271	2	16180
12271	2	29239
12271	2	8907
18448	3	6034
33671	7	11964
22287	2	4725
22287	2	15475
22287	2	7284
22287	2	23889
15898	6	21402
4229	2	13209
20518	6	17028
23517	2	23977
23517	2	9714
23517	2	9392
23517	2	27932
12672	0	33844
12672	5	36558
8288	0	7797
8288	1	27243
8257	0	21007
8257	4	3458
17870	0	32642
18318	0	826
18318	3	11014
6639	3	17620
3159	0	27270
11293	2	16469
26029	0	5034
26029	2	8614
34309	0	16178
34309	2	15581
34309	2	28297
13289	8	31316
13289	3	4638
21941	0	305
31106	3	35210
31106	6	15444
31106	6	31444
31106	6	31387
31106	6	29134
31106	6	8293
31106	6	21919
31106	6	3900
31106	6	13646
15850	2	9851
19224	0	13065
19224	3	35452
1290	0	26705
36421	3	4001
36463	0	9465
36463	3	12438
36463	6	16821
2992	0	27212
4009	4	20346
4009	3	21069
20114	2	4690
20114	2	15691
20114	2	5059
20114	2	34736
36332	2	32086
36332	2	30731
36332	2	20301
30647	3	8030
20828	0	17589
31983	0	5020
27910	8	1920
27910	8	26744
5839	0	17322
5839	3	14704
12023	0	25325
12023	2	19354
34464	0	2638
34464	2	6558
31851	0	3709
19385	2	33496
19385	2	4718
29561	0	21535
29561	3	17630
10708	3	14129
10708	6	20496
9690	0	19211
9690	6	28446
9690	6	8071
9690	6	10043
9690	6	32862
9690	6	26160
35312	0	36320
16153	0	22440
16153	2	8216
16153	2	2955
16153	2	27167
16153	2	20319
16153	2	23024
5229	2	14913
5229	2	17837
5229	2	37008
5229	2	11478
5229	2	13286
5229	2	22194
5229	2	29156
5229	2	24894
5229	2	24609
5229	2	30358
5229	2	24712
5229	2	5313
5229	2	11280
5229	2	17778
5229	2	14224
5229	2	20381
5229	2	11154
5229	2	15689
5229	2	10064
5229	2	2534
5229	2	6493
5229	2	32941
5229	2	18572
5229	2	15004
5229	2	3022
5229	2	28075
5229	2	32730
5229	2	23039
5229	2	28233
5229	2	16296
5229	2	17382
5229	2	22123
5229	2	13133
5229	2	30139
5229	2	19706
5229	2	4136
5229	2	32693
5229	2	36792
5229	2	22693
5229	2	29925
5229	2	30251
5229	2	28533
5229	2	33898
5229	2	34215
5229	2	28621
5229	2	6455
5229	2	1613
5229	2	33334
5229	2	31610
5229	2	32371
5229	2	32535
5229	2	33207
24857	0	6350
24857	1	2606
6008	0	21237
6008	2	22985
6008	2	36679
4016	0	24445
20838	0	11547
20838	3	4881
36995	0	7191
36995	1	13427
6612	0	2538
6612	2	20674
6612	2	31935
23428	8	8903
23428	8	35714
2076	0	3506
2076	2	30172
9992	0	10772
25643	0	24072
25643	2	31061
7337	0	37221
13999	0	29618
23216	3	6162
23216	6	10641
27379	0	33548
11013	0	17562
11013	3	4982
31407	0	28587
31407	2	31044
31407	2	20643
11100	0	2294
3683	8	15282
3683	4	22391
3683	10	37110
35569	0	4331
36958	2	11747
10236	0	21959
19047	0	29155
19047	2	30686
4482	3	9702
29456	2	13204
29456	2	29045
15405	3	4783
8985	3	18777
27838	0	268
27838	2	33855
3232	0	4936
3232	2	14642
33160	6	13391
17665	0	35450
17665	6	16295
17665	6	15265
2991	3	8858
13934	2	16577
882	0	33353
882	4	17827
882	5	6585
882	5	36004
882	5	18470
882	5	34608
882	5	22344
882	5	11369
24288	0	28162
24288	2	24080
24288	2	7153
24288	2	24536
8490	0	1137
1431	0	32698
1431	3	33212
6008	2	34628
1564	0	35991
1564	3	27076
9771	0	10824
9771	4	882
19802	3	21729
24940	0	1
24940	3	21019
32531	0	4798
33891	0	30819
28895	0	33701
28895	3	23412
28895	6	1237
592	6	34858
592	6	33294
592	6	10778
592	6	26441
592	6	16556
592	6	17221
592	6	18272
592	6	25193
592	6	28487
592	6	24232
592	6	3691
592	6	4372
592	6	18023
592	6	21272
592	6	24559
592	6	2735
592	6	13111
592	6	16342
592	6	18807
592	6	8897
592	6	13851
592	6	25508
592	6	18483
592	6	28597
592	6	37106
592	6	5451
592	6	8837
592	6	35624
592	6	4822
592	6	21600
592	6	7215
592	6	22749
592	6	29407
592	6	32363
592	6	27775
592	6	23314
592	6	16056
592	6	10146
592	6	7406
592	6	20325
592	6	9593
592	6	37145
592	6	14944
592	6	388
592	6	11986
592	6	8148
592	6	32518
592	6	14613
592	6	32876
592	6	19611
592	6	22017
592	6	20223
592	6	21636
7547	8	24789
7547	4	33965
502	0	9171
100	3	13408
100	6	2807
29045	0	34976
34469	3	5287
34469	6	14647
30809	0	14217
30809	4	20406
30809	2	23023
30809	6	29125
1870	3	11046
28476	2	6312
28476	2	22606
22622	0	30239
22622	3	26902
1924	0	752
27913	3	16918
8674	0	8991
8674	2	25639
8674	2	7184
18727	2	18446
30481	7	12587
33545	0	9094
33545	6	11823
24930	0	11135
6780	3	5188
4651	0	36625
8438	8	16269
8438	4	1283
3853	0	11023
3853	3	22154
4513	0	8281
4513	2	28966
28340	8	8372
28340	4	8153
33242	0	2725
20699	0	36860
20699	3	10568
23053	3	21700
1200	0	36167
1200	5	30489
16057	0	36678
7583	0	14312
7583	3	19725
7583	2	28715
7583	2	12873
4136	0	5229
4136	2	5333
35202	0	36574
35202	4	30170
2919	8	28606
2502	3	35102
19051	6	14027
25790	1	2606
9488	8	33785
8020	6	6415
7038	8	13796
18059	0	27207
16006	0	27467
16006	3	13192
13826	3	29515
13826	6	30545
13826	6	24423
13826	6	33216
19345	5	253
810	7	29080
23883	0	25965
23883	9	36606
23883	2	5280
23883	5	35878
23883	5	26183
23883	5	17656
23883	2	3458
23883	5	4008
23883	5	18903
23883	5	14190
23883	5	32331
23883	5	34046
23883	2	25873
23883	5	33813
23883	5	7887
23883	2	34428
23883	5	9145
23883	5	21007
23883	5	6787
23883	5	28190
23883	5	18439
23883	5	37074
23883	2	18564
23883	5	29335
23883	9	2342
23883	9	26226
2862	0	18649
2862	2	4561
29111	4	21790
22991	4	22991
31894	0	20444
31894	4	28443
28260	0	29155
12445	0	2842
34983	0	27731
1957	0	21827
1957	2	36312
1957	2	6594
1957	2	22643
1957	2	16933
34188	0	17141
34188	3	1566
14366	6	26435
34751	0	11136
34751	4	21542
34644	0	16658
34644	2	10170
10575	0	22792
10575	2	20340
15907	8	11978
15907	0	21727
15907	6	14313
6447	2	9912
3196	6	33964
35265	2	33256
35265	2	37220
35265	2	26345
35265	2	25786
35265	2	13482
35265	2	20928
35265	2	29751
18366	3	11077
18366	5	18366
2527	0	34088
2527	3	12056
32971	2	9799
32971	2	14523
32971	2	6319
32971	2	12922
37027	8	20228
37027	5	6681
37027	5	2910
37027	5	23948
37027	5	12845
37027	5	6160
37027	5	25376
37027	5	32704
37027	5	30024
37027	5	1411
37027	5	27016
29022	0	28382
29022	4	12966
22310	8	27549
19248	3	19155
1087	5	5872
7181	0	30012
16492	0	9757
16492	2	31197
14257	0	31729
7613	0	21874
7613	2	33905
14782	0	18660
14782	3	36684
15039	0	4345
15039	3	14648
26482	0	12018
26482	1	2606
30658	1	18287
231	0	31000
23547	0	34858
26555	0	20246
26555	2	34372
26555	2	22053
26555	2	1219
26555	2	9669
26555	2	1492
26555	2	36028
26555	2	33504
5438	4	5349
18598	0	12822
18598	4	36287
34636	0	34858
19148	2	10559
10462	0	27049
25732	0	35761
21895	0	29686
21895	0	13838
12306	0	29339
30116	8	2039
30116	5	36224
30116	5	8688
30116	5	36400
30116	6	5820
23595	3	26245
23595	6	7971
23595	6	16847
23595	6	20787
23595	6	21315
23595	6	32511
23595	6	9637
18196	0	34967
18196	3	3340
18196	6	29878
18196	6	6461
18196	6	26012
568	0	19991
568	3	20981
31346	2	27043
15361	3	4822
27988	7	1212
24237	8	13988
16887	8	14278
16887	8	13963
26302	3	13760
26302	6	29025
26698	3	3875
26698	6	37159
26698	6	14140
2031	0	8360
2031	2	28264
2031	2	10569
34254	0	25964
20112	0	29908
24960	0	18612
14868	5	31718
14959	8	14729
11078	3	700
18804	0	34625
19090	0	31491
19090	2	19349
19090	2	2883
19090	2	14836
25321	0	8493
25321	2	8125
6057	0	29752
6057	2	29752
35635	0	5640
35635	2	32598
35635	2	22243
26466	0	27361
26466	3	28784
36852	7	35947
22749	0	28358
22749	3	592
22749	6	25327
22381	0	5620
22381	2	29943
27008	0	4313
27008	2	22941
17055	0	8180
17055	2	16381
30834	0	19596
30834	5	24077
922	0	18900
922	3	7426
785	0	25050
36861	7	5557
24215	4	34497
7733	5	21524
2782	2	5735
28769	4	37098
5215	8	849
5215	3	4548
30822	0	22807
30822	3	20791
10969	0	6747
10969	2	17461
26359	0	1781
26359	2	1515
10609	0	19851
10609	1	28403
29749	0	25444
29749	2	31812
29749	2	35697
29749	2	18390
29749	2	9580
29749	2	15174
29749	2	22292
29749	2	9667
29749	2	16473
22303	0	15944
34845	0	21875
34845	3	11739
34845	5	34845
36323	2	18326
36323	2	17465
36323	5	351
36040	8	24258
36040	1	18287
19654	0	22875
19654	3	5575
5461	2	11100
4349	0	15292
4349	3	26620
36234	0	15826
36234	3	16934
35074	0	25479
35074	2	13133
18897	1	8742
24033	0	33402
24033	2	33972
24033	2	29549
26999	0	28424
26999	5	33708
30438	0	25183
30438	2	27019
13585	0	26998
2593	0	36984
2593	4	32001
2593	4	3380
2593	4	8547
2593	2	33695
7802	4	11817
7802	3	15084
7802	10	13351
7802	10	7427
7802	10	29303
7802	10	33943
7802	5	20706
7802	5	4279
7802	5	16011
7802	6	8219
7802	10	22568
30072	0	19363
3223	7	37057
15142	0	7239
2808	0	26795
4211	3	24249
4211	10	31911
4211	5	21158
4211	6	694
13601	0	10698
20790	6	604
944	1	2606
944	2	17832
944	2	31001
8434	0	8991
8434	9	20716
17302	0	18407
17302	1	4639
13048	0	4432
13048	2	11988
13048	2	33046
7836	0	28440
7836	4	6540
28919	4	1545
28919	5	19143
29375	0	14800
29375	2	17637
28266	0	9827
28266	3	12380
8579	0	826
8579	3	19841
34166	0	2447
34166	1	23923
34166	2	35120
34166	2	2005
33801	2	19666
33801	2	11284
33801	2	13872
33801	2	19056
33801	2	2589
33801	2	3486
33801	2	33444
33801	2	30999
33801	2	32395
33801	2	17081
33801	2	23100
33801	2	35938
33801	2	8139
14538	2	30638
14538	2	22466
14538	2	21638
14538	2	18233
14538	2	16446
14538	2	16074
24449	5	24449
20615	5	28840
20615	2	35851
20615	2	21850
20615	2	35538
20615	2	19871
20615	2	28953
20615	2	5970
20615	2	28796
20615	2	33158
20667	0	35847
28633	0	7184
6118	0	9738
6118	2	13750
6566	0	23148
6566	4	15327
11021	4	29724
9769	0	20319
25387	0	27851
25387	5	25387
14666	2	3981
14666	2	11150
2456	2	18584
2456	2	23351
670	0	18792
25784	0	8428
31420	2	7541
31420	2	12738
31420	2	25256
31420	2	11819
24325	0	19249
35373	0	20650
35373	6	9050
13963	2	24598
13963	2	28679
13963	2	26339
13963	2	16586
13963	2	485
13963	2	8121
13963	2	26744
13963	2	10567
13963	2	16695
13963	2	33380
13963	2	14036
13963	2	13524
13963	2	16887
13963	2	10544
13963	2	30943
13963	2	30942
13963	2	1712
13963	2	18710
3923	3	32176
3923	6	21509
16869	0	21591
16869	2	13711
22984	0	5304
9193	8	8372
9193	4	18344
20666	0	1724
25854	0	36467
25481	0	28179
25481	1	2606
25481	1	6296
11475	3	8606
33400	3	17777
33400	6	33685
33400	6	22905
34392	4	33025
10049	0	16276
26598	0	9460
26598	2	3775
26598	2	31630
26598	2	6658
24834	4	15572
24834	4	28011
24834	4	1601
29040	7	17201
28929	6	9920
21910	0	34296
16290	0	4849
16290	3	31518
23678	0	28098
23678	3	26155
31031	0	2449
31031	5	15121
31031	5	6323
31031	5	15153
25483	0	28906
25483	2	4977
26449	2	17431
26449	2	2961
26449	2	667
3495	0	12071
3495	2	31311
33256	8	35265
21736	0	26950
14723	8	30587
14723	4	15683
1325	2	27551
1325	2	16540
1325	2	32194
1325	2	16207
33952	0	32263
179	6	30687
5294	0	36452
17742	0	4434
8187	0	16224
17496	0	5770
17496	1	1423
6824	3	19365
6824	6	11049
6824	6	9242
6824	6	23702
14218	5	19746
14694	3	5611
14694	6	36418
33349	2	27944
33349	2	15568
18476	4	10331
18476	5	14601
18476	5	25685
18476	5	10807
18476	5	7088
18476	5	33218
18476	5	36996
18476	5	25980
18476	5	33283
5526	0	17948
5526	3	4643
5526	5	21598
2681	0	36903
2681	3	5659
17955	0	25634
11087	0	1302
30581	8	2273
30581	8	2272
35847	2	32528
35847	2	19778
35847	2	20667
35847	2	28317
31822	0	28437
31822	3	26995
3331	0	18117
34687	0	19812
23525	0	20741
34527	0	26408
34527	2	20726
33331	0	21926
4917	2	9352
4917	2	33928
5716	0	4622
5716	1	8958
36684	6	18660
36684	6	8765
36684	6	31535
36684	6	17209
36684	6	3282
36684	6	29320
36684	6	12709
36684	6	24337
36684	6	19933
36684	6	17429
36684	6	18883
36684	6	23195
36684	6	14782
36684	6	8431
36684	6	25737
20219	2	25344
20219	2	22493
20219	2	33973
20219	2	14107
1615	0	35098
1615	2	32362
22185	6	936
25413	0	11971
25413	2	25328
36516	0	32177
36516	2	16697
5550	0	12095
5550	2	34060
6210	7	11678
28431	2	37192
1566	0	14134
1566	6	10416
1566	6	15667
1566	6	4154
1566	6	34188
1566	6	30451
1566	6	10107
2373	0	14529
2373	1	23588
2373	2	33161
33618	3	26735
33618	2	10719
33618	2	17240
33618	2	34771
3791	0	5702
22542	0	19211
22542	3	28886
4893	0	17749
36755	0	12927
36755	1	20862
10202	0	3195
4252	4	901
11026	8	1626
11026	4	4809
17025	0	32840
30314	0	23568
7955	3	22861
7955	6	13171
7955	6	24607
7955	6	11748
6674	0	35252
34197	3	24421
34197	2	31419
34059	3	31288
34059	6	37043
34059	6	11316
34059	6	20455
283	2	28930
18921	0	3910
18921	6	33752
14780	0	4206
14780	3	15378
14780	5	33850
24320	0	11204
34435	0	19897
34435	4	28158
23556	0	7971
23556	3	21315
19457	3	7690
19457	6	27163
19518	3	28474
9581	0	36292
23768	0	3729
32027	0	8949
32027	0	7340
19579	0	14747
5329	2	30562
5329	2	21737
7918	8	6529
7918	8	16194
7918	8	16076
29316	4	10140
29316	5	3581
1624	0	20839
1624	9	23400
1624	9	657
1624	9	21958
1624	9	5542
1624	5	34890
1624	9	29160
1624	9	36983
1624	9	11638
1624	9	25139
1624	9	20587
1624	9	33491
1624	9	32497
1624	9	1825
1624	9	20792
1624	9	4235
7557	6	15239
7557	6	23256
2349	0	28209
2349	3	29249
28009	2	1495
28009	2	3185
5572	0	11810
5572	3	33314
25361	4	22585
25361	5	32398
25361	5	17474
14448	0	7797
9395	0	9119
9395	4	30697
4533	0	9881
4533	3	8721
25052	3	14287
25052	6	8940
25052	6	7391
29538	8	15282
29538	4	4809
10051	0	22954
16219	3	19032
11829	2	15604
11829	2	11398
19760	0	30519
19760	5	35139
23648	0	11067
23648	3	31603
2393	0	7263
2393	3	4844
16837	3	31273
28576	3	19942
28576	2	11254
16865	2	31457
16865	2	3745
32369	6	6285
30949	2	6310
35098	2	1615
35098	2	9510
35098	2	36890
35098	2	15721
35098	2	17473
2812	3	2671
2812	5	3448
13831	0	25988
13831	3	24963
34677	7	18152
33022	6	23433
33022	6	26835
33022	6	27368
33022	6	3473
17148	4	24360
28133	0	16074
28133	2	14926
5133	0	22807
5133	3	36352
15805	2	29487
15805	2	25297
15805	2	8005
15805	2	25408
15805	2	27046
15805	2	27649
15805	2	24309
24589	0	9465
24589	6	30926
24589	6	36785
24589	6	17525
24589	6	34647
24589	6	17376
5652	8	26289
5652	4	20233
5652	9	27118
5652	9	11136
5652	9	23488
5652	9	28053
5652	9	9669
5652	9	35035
5652	9	29410
5652	9	18040
5652	9	24599
5652	9	35254
5652	9	23001
5652	9	12763
5652	9	5319
5652	9	17403
5652	9	36408
5652	9	14764
32231	0	8447
32231	2	27232
16833	0	1793
19046	0	19393
19046	2	23115
19046	2	21313
19046	2	813
20286	4	11389
8496	3	27787
34217	0	10911
34217	3	30050
31644	1	23923
31644	2	33586
29338	8	8372
29338	8	9289
32991	0	23714
32991	0	36956
2227	0	16426
2227	2	25759
2223	0	17136
2223	4	3458
2223	5	3776
32274	3	10820
15494	0	3821
15494	5	11017
12462	2	14951
3909	0	3774
35304	0	9928
35304	5	1296
20937	3	24531
15784	0	9784
15784	2	36368
15784	2	1139
9118	0	128
9118	3	25783
10190	0	21373
17395	0	9946
34089	8	27405
34089	8	30812
1221	0	21002
25890	4	23444
16626	0	4330
16626	9	9132
16626	9	5660
16626	9	2194
16626	9	36180
16626	9	26658
16626	9	31769
16626	9	21148
16626	9	26824
16626	9	31090
16626	9	33416
16626	9	8295
16626	9	9474
16626	9	34516
16626	9	13233
16626	9	16913
16626	9	2283
16626	9	28331
16626	9	13211
16626	9	27118
16626	9	5532
16626	9	32210
16626	9	17244
16626	9	22681
16626	9	22080
16626	9	13053
16626	9	6313
16626	9	13900
16626	9	30516
16626	2	32822
16626	2	20326
16626	2	29994
16626	2	15692
16626	2	29081
16626	2	32508
16626	9	20809
16626	9	32365
16626	9	16478
16626	9	34198
16626	9	29911
16626	9	21245
16626	9	35538
16626	9	3544
16626	9	21481
16626	9	36875
16626	9	32429
16626	9	23569
16626	9	25742
16626	9	35441
16626	9	25085
16626	9	6004
16626	9	5597
16626	9	6150
16626	9	1448
16626	9	3378
16626	9	14693
16626	9	32437
34101	3	17074
34101	6	22898
15286	8	31757
10407	0	22807
10407	3	6371
5971	3	31561
21774	0	24072
21774	2	36145
1642	0	11151
1642	2	30350
20030	0	7550
20030	4	11257
15612	0	13643
15612	3	26667
27394	0	24515
22536	0	7832
22536	2	26028
22536	2	30306
4253	0	29108
4253	4	27104
4253	4	19474
4253	4	34497
4253	4	30697
4253	5	4613
4253	5	6430
25557	0	34663
25557	3	225
9408	6	18819
9408	6	20135
1283	4	25129
1283	5	20581
1283	5	23117
1283	5	14141
1283	5	24053
1283	5	8438
1283	5	15077
7425	0	11602
7425	6	8591
933	0	1484
933	2	6228
35578	0	27288
35578	2	9963
33113	0	4530
33113	0	6
19946	0	34402
19946	2	35633
19946	2	31890
6558	0	34464
7178	6	1722
1505	2	7419
14058	0	16549
25834	0	2828
25834	3	35043
27009	5	19369
27009	2	28040
18173	2	7569
6332	0	3468
6332	2	12711
6332	2	25824
6332	2	36184
6332	2	14535
6332	2	12621
6332	2	9076
30220	0	11440
30220	3	12773
4291	0	2951
4291	5	4161
4855	0	12731
4855	9	26857
4855	9	25779
4855	2	26118
4855	9	6120
4855	9	13352
4855	9	15645
4855	9	556
4855	9	13882
22475	0	29176
22475	3	7635
14783	0	8485
27352	0	18129
27352	2	31094
35942	0	12414
30928	3	28235
8219	0	4127
8219	3	7802
8219	2	26764
5367	3	31386
12835	4	6540
12835	5	32097
22392	7	22487
25776	0	22807
19450	0	32730
19450	2	10138
26821	3	37095
26821	2	34171
26821	2	6608
26821	2	20375
26821	2	9971
26821	2	32055
31815	0	25820
31815	2	556
18181	0	12367
24303	0	34683
24303	2	28202
28504	0	25964
28504	3	22163
17375	0	17313
17375	4	17375
12129	2	29445
12129	2	9862
11649	6	3798
28448	5	33184
28448	5	17098
28448	5	33401
17977	8	18161
19843	0	37013
19843	3	21844
19843	2	34168
19843	2	8571
11512	8	24789
11512	4	358
11512	5	11027
1402	3	18593
19145	0	11688
19145	4	15327
193	9	10932
193	2	20378
193	9	34047
193	9	36276
19132	8	21421
19132	4	30524
12390	0	32788
12390	2	33778
12390	2	7773
33719	0	33477
33719	2	17765
33719	2	18914
33719	2	31838
33719	5	4268
25161	0	36533
25161	5	24115
7408	3	10568
19052	0	12275
19052	2	29235
25770	3	13294
22823	0	32400
22823	0	26669
22736	2	24058
22736	2	10345
6023	8	34699
14430	0	13415
14430	2	17826
8577	3	16614
112	0	18888
112	1	2244
11082	3	8474
31098	0	24691
3643	0	45
3643	6	1336
3643	6	2333
16895	0	8354
16895	2	1026
12793	0	21459
9700	0	31610
26885	0	13928
26885	4	14999
31681	2	12865
31681	2	5639
31681	2	10185
31681	2	36635
31681	2	18666
22300	4	11235
34400	0	14807
32669	0	15069
32669	2	31713
32669	2	22887
15652	6	20639
901	8	2716
901	4	17289
901	4	16327
901	10	593
901	10	11682
901	10	16766
901	10	3355
901	5	4252
901	5	10045
901	5	34870
901	5	30074
901	5	23362
901	5	24195
901	5	24819
901	5	30633
901	5	457
901	5	0
901	6	23009
16286	0	18764
16286	1	22569
14534	7	27592
14534	7	17548
10521	5	5947
10521	5	22851
10521	5	32832
10521	5	879
10521	5	32147
10521	5	26235
10521	5	29243
10521	5	10893
10521	5	10274
10521	5	18258
10521	5	16401
10521	5	27028
10521	5	8396
33749	1	32434
21127	2	26558
21127	2	21355
4939	2	12758
4939	2	29638
4939	2	1079
33804	0	4839
33804	3	17816
15703	0	2383
15703	3	11096
37079	1	27243
[truncated: 94,968 more rows]
