# Supplementary material
Source: ML conference proceedings conference paper supplement (https://proceedings.neurips.cc/paper_files/paper/2021/hash/0fd600c953cde8121262e322ef09f70e-Abstract.html)
Supplement: Supplementary file 1 [file 0fd600c953cde8121262e322ef09f70e-Supplemental.zip › Supplementary_Material_Paper_8745/data/Hamaguchi-BM_tail-5000/test/test-graph.txt]

25428	1	36650
34001	4	12336
34001	5	7063
33450	3	37197
29229	0	37334
10608	6	35378
29082	2	34012
17162	0	37551
36113	0	10561
36113	3	10256
36113	5	5194
34142	4	3099
34142	4	29716
34142	4	16840
34142	2	2211
6155	8	36929
35445	2	29043
3179	5	35201
3179	2	34774
19332	0	36780
753	0	37599
36817	6	28725
36817	6	24891
36817	6	19615
36817	6	30293
36817	6	21554
36817	6	20109
36817	6	32108
36817	6	586
36817	6	20372
36817	6	16288
36817	6	2864
36817	6	9218
36817	6	11872
36817	6	31381
36817	6	17988
36817	6	7613
36817	6	18739
36817	6	12212
36817	6	27077
36817	6	2943
36817	6	33473
36817	6	26037
36817	6	20218
36817	6	14174
36817	6	23967
36817	6	23541
36817	6	6421
36817	6	31033
32964	8	36555
22896	0	37720
15617	0	34664
35967	2	5987
27283	0	35827
36892	0	3200
36892	4	29624
35951	0	5127
36890	8	3082
36890	8	10526
28542	4	35698
30568	4	37856
23428	3	37392
1218	0	37168
1218	3	36499
29823	1	35018
6819	0	35114
10266	0	37599
5165	2	36387
35332	0	28605
35332	3	33823
35332	2	7490
35332	2	1802
35332	2	8065
7965	0	34192
7965	3	34784
29257	0	37847
3543	1	34443
24401	6	34531
24401	6	34919
12788	0	34667
21497	2	35189
7383	0	37121
24106	0	36618
25448	9	37834
33920	6	15082
33920	6	19787
33920	6	25634
33920	6	28826
33920	6	993
33920	6	26362
33920	6	16649
33920	6	16187
33920	6	17947
33920	6	1068
33920	6	194
11642	0	34223
11642	3	34049
34648	2	11188
34648	2	17862
34648	2	22791
34648	2	18764
34648	2	17274
27093	1	35018
3604	0	35827
13620	5	36838
30010	0	37539
28770	0	34106
3199	0	36916
995	5	33883
995	5	35921
5351	0	37203
22771	0	37539
16100	0	34605
28556	8	37473
21912	0	35504
29981	1	34374
8889	2	37340
8889	5	37690
2086	0	35837
37446	5	9238
23662	4	35318
888	0	34606
34295	10	15268
34295	5	33254
34295	2	21488
34295	5	6885
34295	5	16309
34295	5	14710
34295	5	15385
34295	5	934
34295	5	12764
34295	5	7486
34295	5	8880
34295	5	13865
34295	5	30910
34295	5	10323
34295	5	15675
34295	5	32072
34295	5	26342
34295	5	6162
34295	5	15722
34295	5	24651
34295	5	20540
34295	5	28011
34295	5	17635
34295	5	22052
34295	5	8643
34295	5	25345
29745	8	36929
1870	0	36293
16050	0	37385
16050	1	37759
26855	0	36809
26855	5	36769
11438	0	35828
2195	0	35827
36425	2	10661
4282	0	37121
19162	8	36179
19162	8	36051
8687	8	36051
18141	0	34603
19656	0	37745
18957	0	34897
10228	0	37470
3618	0	36347
3618	3	35033
17767	0	34500
24718	0	36253
30317	0	37121
1551	0	33982
9956	5	34581
36788	2	22882
36788	6	33679
36788	6	29500
21849	1	34374
19409	0	36482
3338	0	36460
31166	0	37612
34830	6	12796
109	3	36717
2356	0	36917
21260	1	36639
34942	3	19215
36768	0	20273
5827	2	37552
18903	8	36179
18903	8	36051
18903	4	36032
15806	0	37079
24151	8	36179
24151	8	36051
24151	4	35352
20248	5	35493
1800	8	36555
33708	0	34664
33708	3	34895
28197	0	37727
28197	3	34275
26619	8	33927
26619	1	35531
16021	0	33861
33811	8	34563
23427	0	35225
34276	0	19848
34276	4	20953
29477	9	35896
29477	9	37524
29477	9	35270
29477	9	36134
29477	9	34931
29477	9	34950
29477	9	34943
29477	9	37336
29477	9	37721
29477	9	37054
35334	0	30150
35334	2	31231
35151	0	25445
23688	0	37067
17688	3	35168
24827	0	34846
7691	0	37168
7691	3	34720
7691	6	36192
34165	4	26089
34165	5	17289
34165	5	1634
34165	5	5269
34165	5	9771
34165	5	28179
34165	5	24980
6447	0	37862
15925	0	36109
15925	3	34622
35982	6	32468
21672	0	36482
35066	2	25534
15888	0	36029
16878	0	34843
2125	3	35639
34703	2	14205
34703	2	3782
23430	0	34158
23430	3	36389
6425	7	34321
34354	0	23583
34354	2	32483
34354	2	843
10516	0	36347
10516	6	37080
1787	0	33978
1787	0	36060
34600	5	26921
34027	3	18931
34027	2	22249
34027	2	10758
34027	2	18371
34027	2	16702
34027	2	12723
34027	2	2668
34027	2	14094
34027	2	8664
34027	2	9305
34027	2	27445
34027	2	22597
34027	2	24095
34027	2	3564
34027	2	16969
34027	2	23139
34027	2	3842
34027	2	5105
34027	2	26273
34027	2	12307
34027	2	12054
34027	2	3596
34027	2	28041
34027	2	29420
34027	2	16509
34027	2	26905
34027	2	24182
34027	2	30660
34027	2	1883
34027	2	31147
34027	2	33602
34027	2	31549
34027	2	32402
34027	2	27446
34027	2	17142
34027	2	29524
34027	2	33367
34027	2	356
34027	2	22602
34027	2	6171
12533	3	35576
15563	0	37121
34627	3	28234
34627	6	15725
34627	6	5357
34627	6	33672
34627	6	17463
34627	6	5862
34627	6	24503
34627	6	29973
34627	6	14721
34627	6	17184
34627	6	2688
11136	0	36581
11136	2	36202
16742	0	34223
3813	0	37022
18602	0	37203
34327	2	21767
34327	2	8802
34327	2	8517
34327	2	25374
11507	0	36129
7518	0	35151
7488	4	36117
16207	0	34057
36648	8	28458
36648	3	4178
19921	0	34405
19921	1	34273
28262	6	36057
28262	6	35952
33080	0	37612
27846	3	35583
29063	1	35029
25354	8	37103
36005	4	13406
10906	0	37428
35122	2	30432
35122	2	4256
37211	2	20327
37211	2	9900
37211	2	1716
37211	2	18201
37211	2	6219
37211	2	11693
37211	2	27794
37211	2	3280
37211	2	20423
37211	2	21380
37211	2	31408
8782	6	34472
14655	2	34924
34791	2	13545
34791	2	16179
34791	2	33618
34791	2	10416
34791	2	12071
34791	2	26488
34791	2	22608
34791	2	22347
34791	2	27579
34791	2	22442
34791	2	4794
34791	2	10235
34791	2	16123
34791	2	12924
34791	2	18479
34791	2	10118
34791	2	14237
34791	2	9127
34791	2	2273
34791	2	5873
34791	2	29940
34791	2	13624
34791	2	2705
34791	2	25509
34791	2	29747
34791	2	20924
34791	2	25656
34791	2	14784
34791	2	15765
34791	2	20090
34791	2	11929
34791	2	27384
34791	2	17863
34791	2	3729
34791	2	29714
34791	2	33418
34791	2	20605
34791	2	27185
34791	2	27484
34791	2	25926
34791	2	30795
34791	2	31086
34791	2	26006
34791	2	5837
34791	2	1448
34791	2	30288
34791	2	28714
34791	2	29417
34791	2	29572
22574	1	34374
3615	0	35963
33605	1	36856
21271	8	35384
1864	2	37805
23288	0	35274
20656	0	37081
36734	0	15929
36734	3	4497
28534	0	35071
10071	0	37826
3310	10	37647
17276	2	34640
17276	2	37610
4040	3	34456
25292	2	37094
2895	0	34365
30139	0	35199
22051	2	36160
8856	0	36379
35596	0	8242
35596	2	11769
35596	2	21772
35596	2	26660
34895	6	31673
34895	6	30256
34895	6	9783
34895	6	24020
34895	6	15014
34895	6	15617
34895	6	16578
34895	6	22878
34895	6	25886
34895	6	21999
34895	6	3318
34895	6	3941
34895	6	16347
34895	6	19299
34895	6	22300
34895	6	2451
34895	6	11909
34895	6	14824
34895	6	17058
34895	6	8074
34895	6	12585
34895	6	23162
34895	6	16772
34895	6	25984
34895	6	33708
34895	6	4918
34895	6	8018
34895	6	32361
34895	6	4349
34895	6	19605
34895	6	6530
34895	6	20655
34895	6	26712
34895	6	29410
34895	6	25232
34895	6	21165
34895	6	14570
34895	6	9200
34895	6	6702
34895	6	18427
34895	6	8695
34895	6	33744
34895	6	13569
34895	6	346
34895	6	10878
34895	6	7386
34895	6	29556
34895	6	13276
34895	6	29879
34895	6	17778
34895	6	19992
34895	6	18333
34895	6	19638
6835	8	36555
88	0	37470
1682	0	36388
25875	0	37269
25726	8	33927
25726	1	35531
16989	0	34694
27690	1	35230
22639	0	36900
6133	0	34668
4191	1	35391
31634	8	33927
25753	8	36179
25753	4	35784
30208	0	34532
30208	1	35391
3729	0	34791
31986	0	36780
34873	8	25991
36902	0	24717
37513	3	26810
37513	6	27750
37513	6	22176
37513	6	30185
17543	5	34342
21684	2	34870
21684	5	34316
2567	0	33844
26449	0	35327
26449	4	35417
28978	0	37055
1761	0	35461
1761	2	36084
1761	2	34968
31061	0	35359
34700	2	29400
34700	2	25766
34700	2	4247
34700	2	18831
34700	2	14367
34700	2	12662
34700	2	12820
13048	0	37612
31576	4	34936
9594	0	37098
2864	3	36817
34563	2	30221
34563	2	33811
34563	2	23929
34563	2	23420
34563	2	12247
34563	2	18981
34563	2	27023
37416	3	10050
27592	8	33927
33634	5	36422
26369	4	36044
36328	8	25029
17457	3	34707
970	0	37711
13656	0	37336
24057	0	34359
24057	1	34374
21381	3	35312
24125	2	35892
34695	2	9579
9489	1	35391
19877	0	37526
27366	8	37341
27366	5	36500
21425	3	35057
16509	0	34027
16509	3	35606
34855	0	18121
34855	3	19029
15318	8	34320
35169	3	12503
35169	6	26372
24257	3	36531
1826	0	36162
31121	0	34577
18234	0	37344
3166	0	36550
17315	2	34890
5466	0	37068
5466	2	37068
24043	3	35415
20655	0	34664
20655	3	34895
15468	1	35391
7002	8	36929
28006	0	37121
9952	1	37022
23942	0	36887
34167	0	22945
33829	0	19857
34259	0	23134
34259	2	11929
27650	0	37163
7065	8	34345
7065	3	35746
7065	10	34555
3796	8	34541
3796	3	35597
841	1	34374
11850	2	34301
35657	4	1387
35657	5	17364
25686	0	34667
31040	1	35018
30705	2	34561
34763	2	27838
34763	2	20400
34763	2	19640
34763	2	14588
37304	5	26204
37304	2	32570
37304	2	19836
37304	2	32283
37304	2	26306
37304	2	5386
37304	2	26162
37304	2	30137
35588	0	22211
35588	3	11397
9997	0	34231
8908	0	36751
36015	2	6829
36015	2	11566
36015	2	22934
36015	2	10721
8341	8	36179
8341	4	36686
23136	1	34374
10414	0	34223
30348	0	37539
31249	4	34699
36150	7	19761
36150	7	32051
22552	4	36636
22552	4	34037
26283	0	35529
21500	0	34232
21500	3	34906
35260	5	13730
35260	5	5712
35260	5	13761
30221	8	34563
1186	0	37269
30846	3	36945
34217	5	17900
37616	5	13264
37616	5	23327
37616	5	9805
37616	5	6414
37616	5	30186
37616	5	33606
37616	5	23597
37616	5	30245
34227	0	7608
10060	0	36083
32566	0	34030
35587	0	16434
5155	0	37849
33320	6	36226
33320	6	36344
36683	2	23016
36683	2	20421
36683	2	30866
36683	2	12821
20142	0	35199
5006	0	34466
36948	2	1456
36948	2	25320
36948	2	3260
34800	2	33785
1406	0	34069
1406	3	35346
30538	0	37269
9251	0	35354
9251	3	35561
10002	8	36631
10002	4	34159
15439	0	34440
7207	0	36218
7207	6	33890
31070	0	37599
36018	0	4304
36488	3	28432
36488	6	10270
36488	6	18545
253	0	37269
13428	0	37079
22080	1	34199
17641	0	35529
17641	3	34944
17695	0	37599
34704	0	3353
33007	0	36550
6843	6	33862
34500	0	33123
34500	0	8128
34500	2	6333
34500	2	28736
34500	2	12794
34500	2	26214
34500	2	32152
34500	2	615
34500	2	2903
34500	2	17767
34500	2	29801
34500	2	546
34500	5	6073
5023	0	33982
23032	5	37442
13121	0	35151
26830	4	34159
14715	0	35422
15273	0	34223
23490	8	33927
23490	1	35531
35113	2	5701
34799	3	20545
34799	6	5259
30015	0	35422
15550	8	36929
34293	0	14588
34293	2	13556
4633	0	37121
35535	8	23880
35535	4	18343
35535	9	24641
35535	9	10100
35535	9	21325
35535	9	25488
35535	9	8767
35535	9	31837
35535	9	26715
35535	9	16363
35535	9	22337
35535	9	32033
35535	9	20886
35535	9	15784
35535	9	33067
35535	9	13414
37376	2	24739
15269	0	36928
18392	0	36388
7706	8	37638
28745	1	35018
26649	8	36179
26649	8	37822
11313	2	33881
11313	2	35510
32074	0	37348
32074	4	36491
18988	0	36388
30971	8	34884
23516	8	36929
15081	9	37811
15081	9	36483
15081	2	36803
15081	2	37477
15081	9	34821
9437	0	37121
19770	0	35274
1473	2	34095
20461	2	33989
3836	0	35941
3836	4	36552
3836	5	37829
1150	8	34197
1150	5	34747
1150	5	36813
34475	6	7789
35494	0	1335
35494	2	5627
6497	8	34114
6497	4	37377
24541	0	34812
24541	3	35739
4377	9	34271
36601	0	26504
36601	3	6915
24846	2	35380
32654	0	35024
7453	0	36947
4842	0	36388
11651	5	37141
23412	0	37121
36082	3	33697
36082	2	31045
36082	2	5978
36082	2	18473
36082	2	9038
36082	2	29131
25903	0	34577
35817	0	15700
37766	6	3416
25850	0	36482
17989	3	35502
10448	8	36555
10448	4	34499
10448	4	35612
10448	5	36752
1259	0	37612
172	2	35391
30629	2	35441
22849	0	36723
23406	5	36606
37011	2	21839
37011	2	9384
5436	8	37586
13107	0	36843
10055	0	36388
15325	0	36152
28777	2	35326
14201	0	35827
804	8	34522
804	4	35670
804	5	36090
804	5	34866
14775	1	36756
35700	0	32231
35700	3	13186
9545	5	35487
4454	2	35673
34278	5	30281
36404	2	2901
36404	2	8274
36404	2	33175
36404	2	1383
36404	2	5546
36404	2	26497
36404	2	25060
37789	6	6065
29913	0	35530
191	0	36659
22651	8	36179
22651	4	37464
29581	0	35108
6051	0	37599
14279	3	35477
5990	0	33986
18752	8	36533
34318	6	33102
35160	3	25599
17367	0	33838
15887	0	34223
761	2	37393
3129	0	35259
19024	8	36179
10676	9	36605
10676	2	35697
10676	2	34373
10676	9	37582
10676	9	35859
29598	0	35071
31993	0	37691
31993	3	34044
31993	6	34069
9031	0	34955
9031	3	37080
13110	0	37168
13110	3	36499
36942	0	11633
36942	2	7154
21637	4	35318
13152	2	34900
37368	2	28354
18754	2	37484
6300	0	37720
31401	0	34484
36921	2	15901
35465	0	1765
30695	0	36262
21897	0	34223
11422	1	35018
11422	2	35316
1557	3	35639
37801	0	8798
37801	2	2482
37801	2	22373
37801	2	23407
37801	2	19492
37801	2	12131
37801	2	929
37801	2	16410
37801	2	8625
31917	0	37121
28659	0	34303
17777	2	36581
34116	0	6515
34116	2	23929
34116	2	24359
33300	0	36845
1577	0	37787
35575	0	18503
18598	0	36388
28274	4	34936
8655	0	34664
14674	0	35433
1762	0	36693
1762	3	37093
33540	0	35126
28108	0	36961
8040	1	36650
7422	1	35018
31232	0	36262
32015	0	36270
1061	0	37599
35857	0	3255
37389	4	29772
19157	0	37280
17624	0	34193
21706	0	37612
10305	4	34208
23989	0	34746
11104	4	37856
5407	2	36930
5407	2	36413
13843	0	37387
1424	2	33935
26271	0	36660
19396	0	34223
19396	3	35387
17000	0	36388
35556	0	11010
35556	2	1243
35556	2	29168
35556	2	27400
35556	2	19039
35556	2	9649
35556	2	17699
8186	8	34884
24771	0	37168
24771	3	34720
2571	3	37117
12329	0	34407
35707	6	2188
8246	0	34232
8246	3	34906
4438	8	34590
33943	0	17741
33943	3	6491
37263	3	24385
37263	2	30183
37263	2	28069
35309	0	33283
35309	2	18907
35309	2	29808
35309	2	27424
35309	2	27225
35309	2	24859
35309	2	13916
35309	2	19925
29390	4	36044
2217	1	37022
35865	3	24749
35865	6	7877
8874	1	35029
2489	1	35018
20588	4	35484
2685	8	35384
36002	0	9473
36002	6	25759
36002	6	20399
36002	6	23446
36002	6	21005
36002	6	15523
867	0	36388
33342	0	34805
28949	0	37612
525	0	36652
32757	0	36218
30182	0	37168
30182	3	36499
30201	4	37449
30201	5	36819
6569	0	36388
6569	3	34535
34378	2	10518
34378	2	11546
33964	0	2198
33964	2	13271
36197	0	13718
31822	0	37079
21345	0	35827
6016	3	34094
32368	0	35605
1948	0	35225
32525	0	37599
36051	0	14212
36051	2	10284
36051	2	22531
36051	2	21785
36051	2	19297
36051	2	23540
36051	2	15978
36051	2	770
36051	2	22317
36051	2	18299
36051	2	2721
36051	2	16988
36051	2	13768
36051	2	22958
36051	2	29742
36051	2	20688
36051	2	29090
36051	2	3853
36051	2	13711
36051	2	195
36051	2	32128
36051	2	17652
36051	2	30924
36051	2	26320
36051	2	9233
36051	2	16073
36051	2	28729
36051	2	15731
36051	2	6494
36051	2	29505
36051	2	14559
36051	2	4877
36051	2	18903
36051	2	31171
36051	2	17949
36051	2	28022
36051	2	16981
36051	2	3429
36051	2	18042
36051	2	3846
36051	2	9566
36051	2	24941
36051	2	16678
36051	2	17707
36051	2	24820
36051	2	24876
36051	2	29314
36051	2	20672
36051	2	24478
36051	2	24733
36051	2	18889
36051	2	31410
36051	2	29902
36051	2	19162
36051	2	24765
36051	2	16709
36051	2	29782
36051	2	28382
36051	2	18449
36051	2	70
36051	2	15750
36051	2	32979
36051	2	33224
36051	2	5199
36051	2	3348
36051	2	29748
36051	2	930
36051	2	4455
36051	2	32506
36051	2	8873
36051	2	23901
36051	2	12419
36051	2	24455
36051	2	25300
36051	2	7684
36051	2	25856
36051	2	7715
36051	2	1225
36051	2	8729
36051	2	20036
36051	2	14153
36051	2	31670
36051	2	7861
36051	2	20646
36051	2	17730
36051	2	9171
36051	2	8687
36051	2	24491
36051	2	18487
36051	2	24151
36051	2	23801
36051	2	33406
36051	2	4998
36051	2	17609
36051	2	32745
36051	2	14961
36051	2	27644
36051	2	21159
36051	2	29593
36051	2	25637
36051	2	25273
36051	2	6458
36051	2	561
36051	2	11197
36051	2	32500
36051	2	30898
4323	0	36218
20284	0	37236
27539	0	35827
8920	3	36166
34388	3	8815
904	0	37599
21287	8	37572
32215	0	35306
32215	2	34990
35837	2	10083
35837	2	27490
35837	2	2086
35640	0	5207
35640	1	1280
31732	0	34407
31732	2	37326
34010	6	16255
34010	6	14974
34010	6	19844
34010	6	14722
34010	6	26883
12708	0	36670
32276	0	34365
34013	2	26786
34013	2	21533
34013	2	15496
6667	0	36917
6667	2	36096
15210	0	35151
3065	7	34604
1577	2	35213
1577	2	36479
33180	0	35274
33180	2	37674
33180	2	34687
24800	0	35594
24800	2	36444
35248	6	23192
35248	6	4472
15752	1	34374
19344	0	37098
18558	0	35053
32552	0	37599
1341	8	36179
1341	4	34411
4742	0	37469
667	0	36109
28908	0	37820
18020	0	37487
3136	0	37470
36988	2	2111
36988	2	28259
36988	2	23571
20694	5	33980
34031	2	26508
34031	2	27260
34031	2	33715
26006	0	34791
18901	2	35738
36262	0	5519
36262	2	17185
36262	2	29731
36262	2	16157
36262	2	9312
36262	2	19552
36262	2	30169
36262	2	25704
36262	2	9157
36262	2	2511
36262	2	30695
36262	2	9964
36262	2	31232
36262	2	17811
36262	2	33195
36262	2	9372
36262	2	23617
36262	2	31132
36262	2	26457
8473	0	37677
8473	1	34374
35526	0	13663
35526	3	28041
29772	4	37797
29772	5	37389
10384	1	35029
24110	2	35951
27102	1	34737
35986	1	5255
35986	1	6060
35986	2	31175
28375	4	36242
35368	0	30471
35368	2	16869
27293	0	36109
7259	3	35322
33946	0	11145
33946	4	16151
17108	0	36671
4681	0	36390
37084	4	18599
37084	2	12133
37084	2	19935
37084	2	27205
37084	2	2653
37084	2	30238
37084	2	18996
37084	2	14050
37084	2	8826
37084	2	25164
37084	2	6314
37084	2	2633
37084	2	1487
37084	2	20753
37084	2	805
37084	2	9597
37084	2	7396
37084	2	4658
37084	2	27346
37084	2	25618
37084	5	31929
37084	2	26708
37084	2	5068
37084	2	32331
37084	2	29905
37084	2	5313
37084	2	8989
37084	2	12754
37084	2	4728
37084	5	13082
37084	2	17364
37084	5	31955
37084	5	23015
37084	2	1387
37084	2	16874
37084	2	8752
37084	2	9131
37084	2	25092
37084	2	16326
37084	2	29278
5471	0	34484
15284	0	34223
25772	0	37168
25772	3	36499
1571	2	36920
36718	0	28845
36718	2	29113
36718	2	19506
36718	2	31239
36718	2	29187
15353	0	36825
8793	1	34446
33922	6	15694
33922	6	15508
33922	6	27228
33922	6	13073
33922	6	1820
33922	6	16609
33922	6	13857
17091	3	36499
2642	0	35767
9473	0	34730
9473	2	36002
36122	0	6092
35968	0	8406
21788	0	35259
21788	1	35029
2290	0	36917
34009	2	3998
34009	2	3138
34009	2	33246
12532	2	35253
34071	4	20505
34071	5	26738
34071	5	21708
34071	5	25361
34071	5	12940
34071	5	31736
34071	5	7573
34071	5	23447
34071	5	10293
34071	5	12887
34071	5	32083
34071	5	33603
34071	5	17719
34071	5	12955
34071	6	4307
10678	4	36336
10678	1	34015
15527	0	36229
27486	0	34407
33418	0	34791
10080	0	34484
12402	0	37236
35249	0	30701
35249	1	14750
28061	0	35199
28061	3	34326
28061	6	36936
24201	8	36179
24201	4	35352
34602	0	12603
34602	2	26003
34602	2	12730
34602	2	12449
34602	2	29502
34602	2	6187
35673	2	32188
35673	2	13058
35673	2	8733
35673	2	24640
35673	2	13149
35673	2	7935
35673	2	6076
35673	2	22871
35673	2	12961
35673	2	18342
35673	2	15260
35673	2	4231
35673	2	15222
35673	2	14613
35673	2	20669
35673	2	21710
35673	2	30212
35673	2	571
35673	2	9640
26533	0	35273
26533	2	35200
37054	0	14017
37054	1	29477
28164	0	35277
27713	1	36639
11547	0	36740
4073	7	33997
4073	1	37399
31027	0	34991
7374	9	37002
21777	0	37691
21777	3	36110
13114	8	36179
27039	8	35417
1039	0	35461
13938	2	36593
15471	0	34192
15471	3	33928
21379	8	36179
21379	4	34801
24980	4	34165
24980	4	34446
21245	1	35391
15531	4	36407
9781	8	36179
17709	0	35071
17709	3	34355
3701	0	34223
9182	0	35539
266	2	34786
24937	0	36388
24937	3	34535
37864	1	19600
10168	8	36190
16769	0	34407
20116	3	37128
37537	1	21206
37537	2	6046
37537	2	4957
35791	0	20022
35791	6	32175
35791	6	20333
35791	6	7927
35791	6	18997
35791	6	33153
35791	6	15250
36406	2	19784
35419	6	8995
35419	6	24121
35419	6	33239
25217	0	36070
25217	3	34020
21598	2	36995
20055	2	36353
30704	8	36555
30704	4	35566
12120	0	37539
22586	9	35377
22586	9	35293
37540	0	4973
34909	0	8021
20347	8	36179
8221	0	37269
5431	0	34069
5431	3	35346
37081	2	33490
37081	2	9534
27546	1	36555
26612	2	37029
27937	0	36484
11309	0	37691
11309	3	36946
11309	6	34717
11309	6	37268
19113	0	36388
34357	6	13629
34357	6	32233
2779	0	33990
36358	0	24033
36358	2	23906
36358	2	24894
1828	1	35018
34957	3	16755
34957	6	22104
3934	4	36011
13153	0	37168
1019	0	37691
1019	6	34630
1019	6	35354
6131	8	36631
10324	0	35461
10324	2	33944
34118	2	22144
34118	2	16486
34118	2	10470
34118	2	11926
34118	2	5096
34118	2	22624
34118	2	29293
34118	2	20406
34118	2	20900
34118	2	25564
26682	0	36321
5751	5	33842
8017	2	34492
1822	0	37599
5858	1	37366
24749	0	37691
24749	6	34467
24749	6	35865
24749	6	34865
24749	6	34355
24749	6	37037
24749	6	35057
7672	2	36297
22338	0	37470
32703	4	35493
3154	9	35762
26693	9	35373
26693	9	36453
33963	2	14669
27047	0	34545
5764	0	36388
27542	0	35199
24638	3	36080
19158	0	37121
11137	2	36664
530	8	37103
19944	0	37168
19944	3	36499
36521	0	27099
36521	1	18737
34742	0	20996
31807	0	34192
31807	6	37872
37153	8	8798
8111	3	34044
34840	2	2728
34840	2	29449
34840	2	7356
34840	2	22796
34840	2	10992
34840	2	3531
23176	1	35018
16453	0	35151
34988	2	6798
21625	0	34623
21625	3	34609
32129	2	35577
34535	6	6569
34535	6	24937
25893	0	35151
25893	1	35029
35910	0	15765
35345	0	17101
30001	0	34577
34349	4	4136
2866	0	34109
29064	8	36246
29064	4	37868
36226	0	16928
36226	3	33320
25381	0	34993
34994	2	23145
34994	2	22535
34994	2	6012
6182	0	36077
36889	0	25849
36334	2	4043
36334	2	2078
16046	8	34131
16046	4	35318
36701	0	29860
36701	2	9086
35354	3	1019
35354	2	13221
35354	2	19253
35354	2	12459
35354	2	32109
35354	2	2350
35354	2	32058
35354	2	7795
35354	2	5304
35354	2	31373
35354	2	18663
35354	2	9687
35354	2	9251
35354	2	217
35354	2	23324
35354	2	19117
35354	2	30485
35354	2	15584
35354	2	8432
35354	2	32164
35354	2	27768
35354	2	30422
35354	2	9174
35354	2	22244
35354	2	14558
35354	2	24157
35354	2	21438
35354	2	20237
35354	2	22309
35354	2	28877
35354	2	5533
35354	2	3453
35354	2	19171
35354	2	12429
35354	2	6651
35354	2	20117
35354	2	22364
35354	2	14348
35354	2	8812
35354	2	30561
35354	2	4018
35354	2	9367
5905	2	35331
5905	2	35429
5905	2	35254
15812	0	36257
19199	0	34730
19199	6	36529
37457	5	20328
22257	0	35607
22257	0	34199
36897	2	25629
29769	0	35381
4570	0	35661
3739	0	35827
23704	0	34874
23638	2	34048
16024	0	37470
16024	3	35659
27901	2	35566
27901	2	37572
24047	0	37599
35451	0	6438
35451	3	19029
35225	2	14347
35225	2	31690
35225	2	1948
35225	2	23427
29038	0	35914
22527	6	34033
16353	2	37291
19477	2	34336
19477	2	35431
1089	0	35839
35132	0	5201
35132	2	27595
35132	2	27405
35132	2	20833
12585	0	34664
12585	3	34895
29952	0	36144
37556	0	32313
37556	3	12269
29757	0	34192
29757	3	34784
15912	0	35481
15912	1	34374
31948	0	35801
36538	0	20956
36538	2	24046
36538	2	16059
36538	2	11208
26667	0	34576
22011	0	37539
6891	0	35071
6891	5	37010
30260	4	37767
37650	6	21009
37650	6	32682
37650	6	16757
35218	0	391
35218	2	18966
35218	2	16550
35218	2	24087
35218	2	29251
27582	4	34208
6908	0	35151
10517	0	37121
14488	3	36499
14488	6	37173
26950	0	34505
37488	0	22077
37488	3	3872
29173	1	36074
28420	3	34913
34275	6	30727
34275	2	1330
34275	6	28197
34275	6	29093
34275	6	5488
34275	6	9714
20320	8	36533
22612	8	36179
22612	4	35318
9741	3	34244
34000	2	17766
34000	2	3922
34000	2	33289
16612	0	35151
11648	1	35018
35156	5	16770
36819	4	30201
29551	3	33928
34699	8	23004
34699	5	20446
34699	5	31249
34699	5	13154
34699	5	3410
34699	5	22414
34699	5	21038
20273	0	35151
3437	5	34697
12886	4	36177
8677	0	36347
2179	0	35827
2179	3	37514
15547	1	36182
28672	0	37121
28672	3	35454
28672	2	37429
28672	2	34050
21196	0	34894
13254	0	37143
13254	2	36013
35612	6	13269
20181	2	35501
9824	0	36454
31672	0	35342
28096	8	36631
35629	1	30509
35629	2	15117
35629	2	17508
36348	0	2536
21334	0	35605
22065	0	37658
19647	3	37478
19647	10	35546
19647	5	36247
19647	5	35506
19647	5	36852
19647	5	37782
35094	0	13785
6314	0	37084
2320	3	34374
6722	0	34531
2388	1	35018
2388	2	34712
36606	4	23406
14367	0	34700
13950	0	37003
1851	0	36482
1851	4	35190
22631	0	34664
27214	2	36079
27835	8	36179
24419	0	35201
35675	0	14077
22199	0	36750
37553	4	19118
31044	8	36555
31044	4	35352
14672	1	34374
8098	0	37612
1220	1	35391
9212	8	36555
9212	4	35318
5341	8	33916
25698	0	36903
27625	0	37658
27625	1	35029
750	3	34498
30299	3	36812
29594	0	37360
7707	0	36740
7707	3	34953
25105	2	34418
37559	0	10710
37559	3	4612
21704	8	34794
21704	4	36841
28086	0	34088
8146	0	37312
34951	6	31345
34951	6	22353
27050	0	34466
917	8	33927
917	1	35531
11638	8	37816
12099	0	37269
932	0	37470
36522	0	6092
36522	2	13565
23618	8	34794
5837	0	34791
22926	4	35411
19744	1	36649
23113	8	36555
13912	0	34667
34571	7	33826
12513	0	36239
12513	4	35854
37167	4	4982
3754	4	35773
3754	1	34199
12326	2	37554
36248	6	17908
36248	6	456
30414	0	34302
17972	3	36368
31575	1	35475
9108	8	36179
36068	5	24165
11405	4	37097
10169	1	37811
35655	6	30533
14169	0	37269
3000	2	35258
35856	2	1421
21628	0	37651
21628	2	34454
37830	6	1685
37830	6	8942
14021	0	37470
842	0	36740
842	3	35631
842	6	37413
22029	0	36347
13016	8	35591
13016	8	35384
13016	8	34502
13016	1	36650
23074	0	35515
23074	6	34513
9957	0	34223
36985	5	10286
36985	5	9319
36985	5	16315
36985	5	9663
36985	5	1431
36985	5	11392
36985	5	7618
36985	5	30111
36985	5	11511
36985	5	19094
36985	5	12019
36985	5	33788
36985	5	7591
36985	5	887
36985	5	21585
36985	5	11069
36985	5	15272
36985	5	17137
36985	5	2072
36985	5	32440
36985	5	33626
5817	3	35109
32337	0	35369
9166	0	35359
34807	6	24589
692	0	36347
27617	0	37612
1163	4	36491
28910	0	35402
4310	4	34190
26173	2	35643
7301	2	36329
12859	3	35561
30446	0	35199
37253	0	3099
2096	1	34374
36242	3	15336
36242	2	2122
36242	5	28375
18551	0	35363
33451	0	35108
37605	2	24597
37605	2	15136
37605	2	8118
37605	2	15357
37605	2	22413
37605	2	5571
37605	2	25610
35055	2	58
35291	2	779
32957	0	37612
37350	2	15702
37350	2	14002
37350	2	12367
37350	2	8583
37350	2	25137
37350	2	3150
37350	2	3479
37350	2	15312
37350	2	988
37350	2	22477
37350	2	27961
37350	2	24833
37350	2	19291
37350	2	22036
37350	2	3797
37350	2	6705
37350	2	13361
6592	0	35673
29097	2	34976
34093	5	19441
34093	5	3917
1460	0	37599
35845	2	32041
35845	2	32436
35845	2	23181
37700	2	15879
37700	2	1813
37700	2	15430
37700	2	764
37700	2	31959
37700	2	13295
37700	2	31786
37700	2	844
37700	2	10453
5354	2	35794
23292	2	35753
19987	4	37420
5460	0	35713
15475	0	37699
2205	3	37349
535	0	34915
17242	0	35827
18235	1	35018
8105	2	34343
8105	2	35426
30366	8	36179
30366	4	34801
5354	0	37804
5354	2	37471
34285	6	26118
29345	0	37239
29345	4	35420
27632	0	34531
6931	0	35422
8108	0	37143
14989	8	36555
32846	2	34754
25435	3	36945
5358	2	37672
5358	2	34829
11131	2	34041
11732	0	36109
35891	6	14284
16387	3	35009
15336	0	35529
15336	6	36242
28661	3	36599
27664	1	34844
27664	2	34902
31737	8	36179
31737	4	34801
36421	0	24870
36421	3	20736
35953	2	1378
29478	2	35208
11098	3	35678
11917	0	35028
36330	6	13868
33393	0	37469
11703	0	34618
8852	0	34192
18997	8	37341
18997	4	35143
18997	3	35791
18997	5	37347
18997	5	35175
18997	5	37215
37398	6	13423
13564	3	35576
25460	2	37094
20176	0	36561
20176	3	36786
36172	7	19811
22144	0	34118
21207	0	36388
1760	0	36780
28364	8	36190
28364	4	37786
1301	0	36691
34045	2	32987
34045	2	12672
34045	2	8170
34045	2	33160
34045	2	30444
34045	2	10086
1232	0	37612
1232	3	34309
19210	0	34192
5867	0	37269
23961	1	36650
15105	0	35697
34220	3	28474
23674	0	34223
27110	0	34506
6346	0	35036
34440	0	29115
26476	3	37611
37627	6	6784
35011	0	7347
35011	3	33037
4703	1	36639
36357	5	825
36357	5	31920
36357	5	10889
36357	5	4026
36357	5	20054
36357	5	32185
36357	5	33342
36357	5	26046
36357	5	1282
36357	5	4041
36357	5	10419
36357	5	1648
36357	5	10038
36357	5	10175
36357	5	11786
36357	5	12081
37072	0	808
37072	1	28540
37746	0	25996
18790	2	36900
16614	0	35461
13300	0	34667
37694	3	10680
37694	2	23607
37694	2	20551
37118	2	10141
839	0	35748
7062	6	36331
4913	0	37839
15023	1	36044
36193	5	12137
36193	5	21471
36193	5	26175
36193	5	10890
36193	5	24616
36193	5	4631
36193	5	13584
4285	0	36270
176	0	35199
176	3	35576
7038	0	36388
24736	2	35470
2453	0	37539
27784	8	36555
2254	0	36163
2254	3	34944
34347	3	30801
34347	6	24075
4328	0	35850
33377	0	34192
33377	6	34495
16531	5	35313
33808	0	37612
5457	1	36581
31237	0	37670
31237	3	35106
21039	0	35638
7699	0	36347
36037	2	32578
19170	2	34405
94	0	36347
94	3	36166
94	6	37066
5537	0	37443
4168	0	34158
21122	0	34997
23646	0	36388
19120	0	36693
26247	0	37269
36368	6	23653
36368	6	17972
36368	6	33424
36368	6	33526
35328	4	4773
35328	2	32517
35572	6	24728
12019	8	36179
12019	4	36985
11290	3	35579
21686	0	37269
20916	0	34572
18407	0	36218
18407	3	36216
18407	6	34364
26890	0	37539
37649	0	8411
37649	2	6588
37649	2	26112
37649	2	20270
37649	2	26540
37649	2	1890
37649	2	560
37649	2	21988
[truncated: 38,584 more rows]
