# Supplementary material
Source: ML conference proceedings conference paper supplement (https://proceedings.neurips.cc/paper_files/paper/2021/hash/0fd600c953cde8121262e322ef09f70e-Abstract.html)
Supplement: Supplementary file 1 [file 0fd600c953cde8121262e322ef09f70e-Supplemental.zip › Supplementary_Material_Paper_8745/data/Hamaguchi-BM_tail-5000/test/test-random-sample/test6.txt]

27290	0	37670	1
24831	3	2777	0
6123	2	35896	1
17125	1	15408	0
29082	2	35978	1
29598	10	32220	0
35445	0	33886	1
14117	5	1156	0
36817	6	37300	1
3761	9	20419	0
36817	2	37695	1
32997	4	19319	0
36817	6	34740	1
5928	8	26155	0
36817	6	34052	1
28259	7	34417	0
36817	6	36201	1
24298	0	20360	0
36817	6	36969	1
18504	1	30379	0
36817	6	35855	1
32736	10	20349	0
36817	6	37088	1
31276	8	24831	0
36890	8	36533	1
1479	0	18577	0
576	0	34223	1
12457	9	20223	0
576	6	34772	1
30727	0	27906	0
24401	0	36347	1
8635	4	8635	0
24401	3	35525	1
16223	0	29265	0
25448	9	35764	1
37750	9	3758	0
33920	6	34422	1
13827	1	19255	0
11642	6	35757	1
18577	3	23550	0
13620	0	36482	1
4804	10	37348	0
37446	0	37609	1
37424	8	34587	0
37446	2	35816	1
9366	9	28305	0
34295	5	37381	1
1695	6	35300	0
34295	5	35992	1
15408	7	28101	0
34295	5	35849	1
17554	3	8694	0
26855	4	36251	1
24488	6	15588	0
33314	1	34273	1
11433	9	1695	0
19162	4	36686	1
21999	6	20382	0
8687	4	35100	1
11135	6	34149	0
16004	3	36937	1
13468	3	4044	0
13974	0	37727	1
5611	3	31276	0
539	2	35147	1
28259	3	20331	0
19409	2	36111	1
28767	2	26222	0
19409	2	37628	1
4323	7	26994	0
28727	1	37832	1
96	10	33172	0
28589	0	37030	1
19919	3	17852	0
28589	2	36376	1
3986	7	6151	0
28589	2	35934	1
30727	4	30713	0
5827	0	37646	1
12713	8	15887	0
20248	5	35498	1
26491	1	35392	0
20151	4	35468	1
27929	3	15786	0
8081	1	37759	1
5218	1	36143	0
23427	3	34234	1
14752	10	6245	0
33211	0	36388	1
27463	10	20156	0
35982	0	35515	1
6560	1	32220	0
35982	3	36368	1
11433	3	32004	0
35982	6	34764	1
13973	1	29329	0
15223	1	37823	1
15887	3	37580	0
29857	0	34039	1
37273	10	26259	0
10516	6	34380	1
32997	6	14313	0
34027	2	35825	1
37260	5	36165	0
34027	2	36620	1
28767	0	27929	0
34027	2	36067	1
34802	7	24395	0
34027	2	37176	1
8635	3	19610	0
34027	2	36389	1
15353	2	35392	0
34027	2	34539	1
36870	4	3756	0
12533	0	35199	1
29598	8	27102	0
16284	1	37022	1
19209	3	16470	0
20236	2	33923	1
21115	10	35435	0
34327	2	37678	1
23588	3	16223	0
11507	3	35739	1
15332	4	3743	0
28262	6	37397	1
26976	10	20382	0
28262	6	36081	1
36071	9	31904	0
28262	6	35268	1
16853	2	35195	0
28262	6	35346	1
36922	1	32722	0
28262	6	36724	1
31160	9	22559	0
33440	0	34306	1
25348	2	11039	0
28459	0	36292	1
6690	3	24813	0
35122	2	34238	1
36745	3	36003	0
37211	3	36963	1
15538	10	28706	0
9719	0	37539	1
5342	0	9313	0
8782	6	35116	1
34954	9	24298	0
14655	2	33840	1
24831	1	36745	0
34791	2	34172	1
35272	8	27350	0
34791	2	37846	1
7288	9	17098	0
34791	2	34505	1
3756	0	24647	0
34791	2	34985	1
21636	5	29879	0
34791	2	34675	1
13407	1	14548	0
5421	2	36948	1
2409	4	5623	0
33571	0	36482	1
34099	4	34502	0
30139	3	35283	1
32132	4	36071	0
16019	3	36842	1
29945	7	22025	0
17951	0	36242	1
2777	9	23016	0
35596	2	37784	1
25850	8	11864	0
34895	3	34803	1
25707	2	22869	0
34895	6	36891	1
31266	4	96	0
34895	6	34171	1
4855	7	35788	0
34895	6	37311	1
35532	2	34105	0
34895	6	35312	1
7495	8	20156	0
34895	6	35184	1
4028	3	11135	0
34895	6	36080	1
30727	7	12036	0
34895	6	34512	1
20773	9	22559	0
34895	6	34886	1
33847	3	26769	0
34895	6	35228	1
9975	9	17488	0
34895	6	34358	1
33764	8	911	0
31324	0	35422	1
35187	0	37670	0
6867	2	34351	1
8453	8	1149	0
2244	0	36218	1
24282	5	2260	0
17279	0	37720	1
28763	5	14667	0
17279	3	34513	1
37011	6	34523	0
7270	0	37203	1
9591	6	36486	0
37513	6	35970	1
31163	3	29247	0
17543	4	34295	1
11873	10	8324	0
21684	5	37856	1
37069	6	27102	0
21684	9	37307	1
28706	6	28258	0
34700	2	35592	1
1156	6	20016	0
34700	2	34809	1
3311	4	33104	0
13048	3	34155	1
9715	6	36140	0
5829	0	35112	1
21309	1	37095	0
5829	1	34199	1
13584	0	26994	0
34563	2	35050	1
37657	0	1447	0
33634	5	34134	1
36165	8	9975	0
4906	4	36923	1
25724	7	31266	0
11168	2	36443	1
17311	4	20156	0
21425	6	36561	1
35290	6	36045	0
21425	6	36256	1
5996	2	31491	0
22003	4	37786	1
96	9	33918	0
24257	0	35827	1
26813	6	3123	0
1826	1	35029	1
35770	10	15588	0
18234	3	36945	1
24997	8	3978	0
13506	0	34540	1
20797	2	21588	0
2496	0	34500	1
35195	4	37698	0
32994	0	36436	1
35300	4	20156	0
2324	4	36348	1
32216	10	14667	0
7065	6	36066	1
37507	4	15588	0
18855	3	35333	1
4205	4	34785	0
841	0	34988	1
17375	3	2333	0
30705	0	37211	1
5611	2	32132	0
16688	8	33927	1
18504	7	21309	0
16688	1	35531	1
15641	9	21588	0
22197	0	36388	1
6151	3	35541	0
22197	3	37807	1
37301	7	30379	0
37304	2	37452	1
1281	0	11891	0
37304	2	34947	1
4855	1	36292	0
2204	0	37143	1
34149	7	36045	0
12693	2	35301	1
34831	0	28773	0
3530	0	35363	1
16450	1	19610	0
22552	4	35918	1
25724	7	30379	0
24027	0	37102	1
37151	6	28132	0
1186	2	35596	1
36701	3	8091	0
13351	0	35827	1
26259	1	36179	0
30303	0	36380	1
25545	6	29995	0
37616	8	34197	1
34083	5	4044	0
37616	5	34747	1
19255	7	26131	0
37616	5	35633	1
23369	8	8759	0
16285	2	35677	1
30733	4	36120	0
32566	2	35573	1
36321	10	11817	0
32566	2	37582	1
33673	5	20953	0
33320	0	37470	1
20265	4	11638	0
33320	6	37735	1
7895	8	25027	0
36683	2	37703	1
37072	10	32132	0
20467	6	36602	1
12169	5	12169	0
36018	4	36018	1
17852	8	2402	0
17163	6	34014	1
18616	0	35518	0
22080	4	35773	1
37483	3	20156	0
4808	0	36334	1
9663	2	13827	0
6843	0	36188	1
37342	4	31350	0
34500	2	37755	1
15246	10	25891	0
34500	2	33978	1
20331	3	14201	0
25447	0	37570	1
33673	9	37546	0
29415	3	36717	1
32997	2	9800	0
35113	1	36989	1
9606	6	13463	0
31889	2	36751	1
10174	10	22120	0
31889	2	35713	1
12519	2	9715	0
31889	2	37589	1
5957	2	33863	0
3516	1	37667	1
5772	5	30382	0
32074	4	36784	1
622	10	27463	0
15081	9	36021	1
24647	3	30733	0
15081	9	37711	1
22787	4	27488	0
15081	9	35445	1
16853	0	34018	0
13877	5	34966	1
20656	3	26291	0
8533	3	36030	1
32748	3	33673	0
1150	5	35602	1
17311	1	26994	0
34475	6	36126	1
17350	4	23736	0
1354	5	34718	1
25707	10	34493	0
27456	2	34163	1
28919	2	26131	0
4377	9	36215	1
10526	1	34126	0
4377	9	36838	1
33584	0	35532	0
11651	0	37348	1
35580	8	96	0
37766	0	36914	1
6546	1	5996	0
25850	5	34484	1
2384	4	7691	0
10448	4	34411	1
25174	10	4213	0
18185	8	36190	1
34954	1	37862	0
30629	5	35242	1
1447	2	35119	0
23406	0	36388	1
28413	9	25545	0
5436	4	35612	1
9818	1	34333	0
7775	0	36388	1
34333	1	17004	0
28777	0	34897	1
29945	8	26769	0
29692	2	36666	1
207	10	34549	0
14201	3	37514	1
3311	9	21637	0
804	4	37377	1
28751	3	11378	0
804	3	36458	1
35580	2	13292	0
804	5	36510	1
26769	3	33847	0
804	5	35519	1
13806	10	34290	0
9545	0	37130	1
12713	10	9468	0
37789	0	34601	1
23016	5	14871	0
19219	6	34176	1
911	0	4855	0
29581	4	35582	1
15224	8	33044	0
5379	0	34579	1
28763	0	34294	0
15404	0	34812	1
9781	4	37546	0
16771	0	34149	1
30727	5	31276	0
13422	2	34955	1
25850	8	32107	0
37356	2	35607	1
18635	6	25707	0
37356	2	37575	1
25209	4	28874	0
20851	0	36347	1
21570	10	24298	0
35160	6	37100	1
25505	5	3756	0
6992	4	37767	1
37048	5	9818	0
6992	6	37232	1
911	7	13209	0
10676	3	36167	1
35706	5	28706	0
10676	2	35038	1
22797	6	26976	0
10676	9	35747	1
4830	3	17596	0
13152	2	37457	1
11677	8	22869	0
21897	3	37080	1
24395	3	19209	0
1557	2	35539	1
13407	10	15408	0
1557	2	37796	1
10526	7	96	0
37801	2	34398	1
31571	7	5788	0
17777	9	36456	1
3838	8	34587	0
16993	0	34802	1
4044	7	36771	0
1762	6	35115	1
11873	7	28706	0
30115	0	35691	1
1757	5	11891	0
30115	2	34686	1
9971	8	5623	0
30115	2	35148	1
9025	9	11891	0
30115	2	35345	1
6459	2	15694	0
31201	0	36347	1
5772	7	21999	0
22179	0	34369	1
25209	2	37136	0
22179	2	37645	1
36274	5	18823	0
35556	2	36132	1
35041	0	22787	0
29390	0	36899	1
4213	5	15641	0
35865	0	36347	1
37585	5	32220	0
19174	0	34223	1
30403	10	29352	0
16477	0	37539	1
31577	3	5788	0
16477	3	35699	1
1695	6	19209	0
16451	1	35815	1
7635	7	21115	0
25063	2	37249	1
26625	5	23693	0
25063	2	34915	1
21999	10	7661	0
36051	2	34202	1
23145	2	6320	0
36051	2	34278	1
10476	0	12855	0
36051	2	37347	1
34566	10	5928	0
36051	2	37215	1
1888	8	34802	0
36051	2	36325	1
25408	1	25440	0
36051	2	35877	1
24813	9	37151	0
36051	2	34655	1
10717	5	2260	0
36051	2	37167	1
37424	1	35518	0
36051	2	35730	1
28259	3	5249	0
36051	2	35559	1
20656	0	28874	0
36051	2	36774	1
8563	5	8563	0
8920	0	36347	1
5218	1	25546	0
10951	0	34030	1
22797	4	18616	0
35640	4	36265	1
37273	10	5237	0
11679	0	36347	1
36922	6	10431	0
11679	6	33948	1
13468	1	29352	0
11679	6	36604	1
9025	5	2384	0
34010	6	37129	1
37507	2	37546	0
34010	6	35830	1
35541	2	35564	0
34010	6	35603	1
14786	6	11039	0
34013	0	33868	1
13150	8	17676	0
6667	2	33906	1
11677	6	18828	0
6667	2	36077	1
17877	5	18604	0
6667	2	35319	1
14639	4	33983	0
1577	2	35536	1
12169	0	23857	0
33180	2	36362	1
29343	4	20980	0
24800	2	34569	1
27102	5	37313	0
35248	6	34878	1
37588	3	32748	0
15752	3	37677	1
36528	8	1281	0
7435	4	37763	1
34285	1	7895	0
32177	0	37126	1
33110	3	17125	0
11886	5	37557	1
17554	6	28413	0
27649	8	34590	1
23550	0	1479	0
3136	3	33925	1
37439	0	2402	0
26006	2	34397	1
2737	10	12519	0
26006	2	35672	1
2359	10	28874	0
18901	2	36830	1
37657	0	17004	0
35986	1	34169	1
36003	1	37439	0
37084	4	34286	1
10938	2	7895	0
37084	2	36675	1
18752	6	32997	0
37084	2	35895	1
1156	9	36003	0
37084	5	36720	1
21158	10	8787	0
37084	5	34833	1
18577	3	2359	0
15284	3	33932	1
14548	4	27906	0
33922	6	36385	1
6690	9	25515	0
9473	6	35142	1
37368	1	6844	0
3537	0	37102	1
1888	10	10807	0
3537	2	36670	1
13973	7	25545	0
34071	3	37478	1
7661	3	17004	0
32013	0	36991	1
36396	9	10789	0
8116	4	35854	1
32722	1	6059	0
36098	0	37269	1
30382	0	5966	0
5468	0	34091	1
33110	3	35564	0
25691	0	35089	1
5966	9	25408	0
31761	1	35230	1
19471	4	11531	0
13938	0	34016	1
36003	5	35564	0
24980	8	36246	1
22025	8	33847	0
10457	2	34521	1
9392	5	11638	0
37127	0	36034	1
34785	3	6059	0
17541	0	36218	1
21127	10	19919	0
17541	6	36492	1
35392	0	27906	0
35791	6	34071	1
24298	1	28668	0
11697	0	35677	1
20223	2	8759	0
8221	2	34788	1
20388	7	1438	0
37081	2	37081	1
8447	5	37136	0
27546	0	37866	1
28763	3	37588	0
26612	0	36210	1
3756	10	11638	0
18261	4	33930	1
23445	0	9975	0
11309	6	35233	1
17164	2	18323	0
11309	6	37089	1
8447	4	33863	0
34357	0	34668	1
28426	1	19186	0
18919	2	34470	1
33172	3	24999	0
2779	2	35232	1
17676	5	2465	0
26570	0	37179	1
20797	10	25560	0
26570	2	34096	1
9818	7	35259	0
1019	6	34279	1
5957	9	18577	0
34118	2	35799	1
35788	4	34099	0
34118	2	34675	1
20545	3	19471	0
34118	2	36893	1
35912	3	10476	0
34118	2	34001	1
33172	8	5560	0
34118	5	34412	1
26769	4	17852	0
34118	2	35484	1
5560	4	8981	0
32105	0	36617	1
21405	9	8563	0
8017	2	36229	1
35290	0	25505	0
8017	2	37236	1
17593	6	6560	0
13480	0	35827	1
434	7	14106	0
24749	6	35899	1
2465	4	35912	0
24749	6	36216	1
21197	1	12855	0
24749	6	36273	1
3838	0	10476	0
24749	6	34835	1
34587	10	9818	0
32703	5	34900	1
29352	6	6844	0
27542	6	36010	1
31603	10	19610	0
22435	4	35709	1
21999	7	6103	0
8111	6	37620	1
34502	2	35046	0
34840	0	36550	1
30994	8	26176	0
30001	3	36733	1
34113	10	37546	0
34349	4	36353	1
36412	3	21088	0
29064	4	34446	1
2737	6	1479	0
32781	0	34683	1
32216	2	33941	0
36334	0	35332	1
17738	4	24395	0
35354	2	35789	1
13524	9	13407	0
35354	2	37060	1
37048	3	31577	0
35354	2	34681	1
28258	10	31631	0
35354	2	34807	1
16539	1	7691	0
35354	2	36158	1
5095	6	35249	0
35354	2	36827	1
31962	6	4225	0
35354	2	34285	1
32722	1	21115	0
35354	2	36199	1
8759	1	17852	0
35354	2	36765	1
28763	3	2384	0
35354	2	36339	1
36019	6	11677	0
31400	0	36611	1
17125	6	34728	0
4570	2	36479	1
34113	3	6844	0
23704	9	35645	1
34096	4	33950	0
23704	9	34875	1
14871	2	6080	0
18503	5	34581	1
9781	8	469	0
23638	2	36848	1
11850	9	5951	0
27901	2	36929	1
30075	9	12713	0
27901	2	35327	1
30713	7	30714	0
27901	2	37473	1
34290	4	28259	0
35225	0	37067	1
37095	3	13283	0
30793	8	34345	1
9392	1	13759	0
13419	3	36486	1
34159	7	4225	0
22527	0	36218	1
28101	1	6320	0
25374	2	36461	1
28874	3	32139	0
28442	2	36023	1
24813	6	18752	0
6720	3	35576	1
6601	1	25545	0
15084	6	35302	1
34785	8	37439	0
3284	2	37757	1
34456	8	5946	0
3284	2	34105	1
8123	0	6103	0
12629	0	35199	1
13827	4	21999	0
6891	2	35702	1
20876	1	36120	0
6891	2	36716	1
8782	2	17311	0
30260	8	35375	1
23338	3	26155	0
30260	5	34595	1
35272	7	23357	0
37650	0	35740	1
5095	1	18752	0
25526	0	35422	1
30714	0	29995	0
25526	3	37299	1
207	4	37313	0
34275	6	35478	1
25560	2	4213	0
34275	6	36248	1
32422	2	19343	0
30963	0	37470	1
16033	9	34126	0
30963	3	35795	1
15332	0	36870	0
666	2	35480	1
8091	7	29247	0
35156	4	34295	1
13827	1	29247	0
35156	5	35143	1
20223	1	17596	0
35156	5	35045	1
35804	3	8018	0
3437	4	34795	1
33983	8	21637	0
3437	5	34933	1
17554	2	13407	0
12886	5	35640	1
37546	3	32147	0
32474	2	36047	1
6560	10	32748	0
13254	2	37042	1
18752	7	21127	0
20181	2	36767	1
37072	7	25891	0
36566	0	34392	1
37825	9	9644	0
19647	3	35791	1
24298	8	32082	0
19647	10	37516	1
595	0	13392	0
19647	5	36032	1
3756	8	18604	0
2842	0	34231	1
13509	6	28007	0
25298	0	35827	1
20223	6	10431	0
27835	4	34866	1
37585	7	469	0
37553	4	35833	1
31276	2	27082	0
28571	0	37288	1
5951	7	35160	0
28485	5	36570	1
12266	1	17554	0
8098	3	36291	1
13392	8	8787	0
11396	5	36847	1
28050	8	17738	0
34951	3	36817	1
16764	8	1757	0
27050	2	35680	1
22787	7	34502	0
30525	8	34114	1
31577	4	25408	0
3397	2	34196	1
10439	6	10650	0
733	0	35529	1
9715	1	25348	0
17972	0	35515	1
35187	8	20234	0
36068	3	37175	1
21197	0	35195	0
35856	0	35365	1
13350	3	28811	0
23074	3	37056	1
23590	4	37862	0
31155	0	36206	1
901	4	28874	0
36985	4	34793	1
36617	7	30733	0
34807	6	37135	1
1156	6	31276	0
18432	1	35391	1
13827	2	37461	0
1163	0	36589	1
10650	0	5788	0
1163	5	36791	1
29913	2	6080	0
12859	0	34630	1
29841	4	32220	0
12267	0	37612	1
17738	5	2333	0
6734	0	37436	1
24831	1	17554	0
36242	0	36163	1
20653	8	32107	0
35055	3	36312	1
36887	3	28438	0
37350	2	37076	1
14639	10	36305	0
34093	8	37572	1
13524	0	35160	0
34093	5	35977	1
3311	5	3311	0
37700	2	37024	1
35272	3	35300	0
37700	2	36660	1
10431	10	17852	0
23292	2	35728	1
28438	2	35788	0
29039	0	37599	1
15786	10	2409	0
17242	3	33851	1
37439	7	19319	0
8105	2	36749	1
27463	2	24999	0
5354	2	37631	1
34872	6	96	0
34285	3	35561	1
17852	8	34785	0
29345	1	34117	1
34417	8	20773	0
9711	2	34993	1
13509	2	3758	0
9711	2	35725	1
37670	7	28259	0
22835	0	35422	1
18323	2	22266	0
11732	3	36978	1
20388	3	3243	0
11732	6	33920	1
33983	5	10858	0
11732	6	36544	1
1149	9	16338	0
11732	6	35458	1
28101	8	35160	0
18075	0	33951	1
1281	7	32748	0
26828	0	37295	1
35743	0	11123	0
35953	0	35034	1
32147	10	34159	0
29478	2	36425	1
1757	3	3633	0
24037	0	36218	1
6459	2	28266	0
33393	3	35639	1
35092	10	36396	0
8852	3	37293	1
37862	0	32107	0
18997	5	35357	1
24863	5	21637	0
18997	5	34058	1
7645	3	33983	0
23806	0	37470	1
32738	9	29945	0
34045	2	37094	1
12293	0	14871	0
22155	2	36681	1
34456	5	4830	0
36357	8	34197	1
36887	10	27350	0
36357	5	35633	1
4515	10	29343	0
36357	5	35533	1
15588	8	10717	0
37118	2	34000	1
17125	4	34496	0
36193	5	36813	1
13584	10	34375	0
1558	0	35902	1
26491	1	36013	0
2254	2	37375	1
21637	3	10174	0
33377	3	35015	1
17593	0	29598	0
33808	3	35222	1
33950	2	15353	0
7699	6	36697	1
35249	1	19919	0
19170	0	34293	1
34106	3	37069	0
21122	3	37268	1
27239	8	23590	0
21122	6	36823	1
9715	0	2673	0
26460	0	37305	1
14146	2	15332	0
19120	3	37093	1
34375	5	27350	0
19120	6	35066	1
28763	8	2944	0
19120	6	37676	1
17961	0	4323	0
36368	6	35982	1
26155	2	28751	0
36368	6	35495	1
28751	6	28132	0
18024	0	34045	1
34375	5	26994	0
29848	2	37118	1
24647	10	10258	0
37649	2	37364	1
11891	1	21891	0
37649	2	37619	1
29598	0	16409	0
19305	6	36294	1
21683	7	37151	0
11761	0	36093	1
35571	6	2402	0
11761	2	37534	1
28763	7	17438	0
11761	2	36762	1
13827	7	36701	0
4233	3	34023	1
34076	10	32139	0
31199	2	35435	1
25698	10	25856	0
30795	2	34327	1
2333	2	8981	0
34030	2	36961	1
28101	9	9606	0
31613	2	37776	1
32583	4	12519	0
25617	2	35448	1
6198	6	37273	0
20768	0	35780	1
13209	7	9353	0
36081	6	37214	1
22514	7	30085	0
28404	3	37423	1
6080	1	35858	0
11567	0	35354	1
25545	3	35392	0
1145	3	34979	1
28413	3	31904	0
24732	6	35788	1
5237	3	8782	0
2173	4	34801	1
31276	10	17554	0
23780	4	36923	1
24118	1	34372	0
32160	2	36897	1
5237	1	37313	0
32160	2	36843	1
30075	10	29329	0
25725	5	35046	1
35581	7	29045	0
4208	2	34306	1
35912	1	10599	0
26506	0	36514	1
26131	10	28811	0
36440	3	36471	1
31066	9	15678	0
34365	2	34378	1
29343	7	37698	0
34365	2	36205	1
12880	8	6245	0
34365	2	33914	1
37115	0	37686	0
23956	0	35494	1
23968	0	16033	0
317	0	35214	1
11433	9	280	0
34961	2	36645	1
17877	9	35532	0
36127	3	36063	1
6459	5	18823	0
26981	0	36454	1
34954	3	20185	0
9733	5	35883	1
22120	10	31631	0
9733	5	34596	1
4855	8	1888	0
9733	10	37523	1
34105	1	25027	0
25151	3	36696	1
13759	10	7895	0
736	0	37428	1
32997	3	32997	0
22158	0	35529	1
22514	7	23693	0
19128	0	36658	1
9975	4	30994	0
12121	0	36600	1
15786	9	28767	0
33506	4	36798	1
22787	8	6111	0
4771	0	36098	1
29995	9	28101	0
9700	0	37555	1
36922	3	20349	0
9700	5	34111	1
18635	10	25684	0
5523	0	37770	1
9644	2	6245	0
5523	0	37571	1
16853	7	5772	0
16701	6	36873	1
19098	8	34456	0
24851	6	35589	1
23314	5	25545	0
37586	2	36752	1
3123	9	21211	0
6180	2	34030	1
26879	8	21115	0
6180	2	35158	1
8635	6	35290	0
6180	2	35161	1
6690	3	34566	0
28980	2	34393	1
31276	4	6151	0
14222	0	35108	1
434	6	34831	0
14222	2	37260	1
35571	10	14313	0
14222	2	34494	1
17596	2	31491	0
14222	2	35604	1
19517	1	31845	0
14222	2	37113	1
20185	8	28874	0
35977	5	34024	1
5951	9	34096	0
35977	5	36059	1
6459	8	19255	0
35977	5	34544	1
12266	10	34195	0
35977	5	36097	1
9366	1	24997	0
35808	0	36379	1
32312	4	33104	0
24161	2	35828	1
9025	9	2260	0
24161	2	33836	1
22787	1	911	0
36110	6	35807	1
34523	8	20234	0
15037	3	35576	1
19610	9	3756	0
28789	3	35346	1
32107	7	2409	0
29773	0	36787	1
12855	6	37424	0
35650	0	37539	1
23968	9	2837	0
2097	0	34443	1
29995	2	35392	0
2097	9	37391	1
11873	8	1212	0
2097	9	36139	1
4310	8	35581	0
32689	0	37658	1
6546	3	35580	0
18833	5	34383	1
4225	0	15588	0
18833	5	35221	1
1460	9	31514	0
18833	5	37047	1
30379	3	36321	0
2618	2	36763	1
37698	9	18616	0
2618	2	34479	1
20872	0	23590	0
33519	0	36125	1
25440	9	31577	0
12184	6	37234	1
27906	9	35541	0
246	2	37318	1
35446	1	35187	0
9414	4	37786	1
35374	10	36292	0
34801	5	34938	1
36305	3	37862	0
34801	10	35176	1
20773	4	14786	0
4835	0	34967	1
17488	10	36165	0
26628	0	36484	1
3838	2	23857	0
32254	0	35461	1
25348	10	35187	0
32254	2	36557	1
21431	8	4323	0
2764	0	35914	1
37686	5	12457	0
35069	0	35594	1
2737	8	36486	0
13767	0	34562	1
35912	6	3758	0
18395	3	35576	1
37825	4	18635	0
34251	5	37386	1
17961	5	14847	0
32977	6	36342	1
37011	4	36486	0
37590	0	37489	1
4225	4	34113	0
28923	3	35250	1
35454	1	10174	0
21027	0	35871	1
36992	6	35858	0
21027	2	37496	1
19343	5	7895	0
22201	0	34369	1
6546	9	26131	0
5541	3	34044	1
23016	6	28101	0
31794	0	37143	1
14992	2	24282	0
34529	1	34374	1
35564	0	14117	0
27374	0	36054	1
27239	0	24997	0
27374	2	34805	1
31163	3	35134	0
22024	3	37838	1
30727	10	36013	0
12871	0	34003	1
20349	1	12880	0
23908	8	37801	1
29841	3	33673	0
23295	0	37168	1
30702	2	28874	0
486	0	34069	1
9644	8	6059	0
486	3	35346	1
11135	10	32583	0
12203	0	35586	1
11531	3	29247	0
12203	4	33866	1
3743	3	8635	0
23352	0	34116	1
34099	5	17098	0
9459	2	36459	1
33863	2	35743	0
9459	5	34633	1
17488	2	4830	0
33162	0	34763	1
20388	1	15588	0
13748	1	35018	1
16107	1	29352	0
18504	4	35347	1
28874	6	7645	0
5969	0	37098	1
14201	0	36045	0
37728	0	36117	1
15786	7	15641	0
19924	2	37191	1
36179	4	17438	0
22978	0	37246	1
3761	0	5928	0
35021	4	35330	1
23357	4	37342	0
6119	0	35306	1
25440	4	37657	0
34183	0	36388	1
13642	0	37439	0
33039	2	34640	1
10526	0	29942	0
25842	0	35876	1
2333	2	17311	0
16497	0	37130	1
23357	6	17961	0
755	0	35191	1
5575	8	23369	0
755	3	34557	1
2837	0	96	0
35514	0	36287	1
36887	7	21405	0
33113	1	36856	1
29913	4	35092	0
35351	0	34030	1
21814	6	25174	0
17484	0	34340	1
36041	8	6546	0
35879	5	34122	1
18828	10	32736	0
7266	1	34362	1
29995	10	32132	0
19788	0	34379	1
14117	8	14117	0
1158	6	35502	1
6546	9	25684	0
34102	2	36313	1
26625	3	36143	0
34102	2	35838	1
595	0	9366	0
17973	0	36263	1
19255	7	34587	0
14631	0	37494	1
37115	6	31491	0
19141	6	36588	1
11864	7	595	0
37529	2	35919	1
12822	0	37483	0
35475	0	35974	1
33584	4	36045	0
35475	1	35391	1
21940	6	5788	0
31854	0	36230	1
28767	3	1396	0
19930	4	34165	1
36120	0	12519	0
20815	0	37336	1
4576	0	4576	0
532	0	37595	1
36274	1	32139	0
21184	3	37708	1
1695	3	37301	0
37661	3	35033	1
21197	9	10526	0
37661	6	34023	1
96	0	28438	0
37832	2	34106	1
24488	10	207	0
37832	9	35067	1
5237	7	15200	0
37832	9	36313	1
9025	4	34113	0
37832	9	36939	1
34285	7	20234	0
19281	2	36184	1
32259	0	25174	0
19281	2	36901	1
16539	3	32216	0
37478	6	36143	1
37260	4	22869	0
37478	6	35100	1
20349	8	6690	0
32156	0	35858	1
4627	9	18851	0
7107	2	35900	1
16270	4	37461	0
19496	0	35813	1
36041	6	16853	0
19496	2	34808	1
29841	4	20388	0
6872	0	36388	1
6059	7	33995	0
29293	4	34675	1
24488	6	34549	0
7712	0	35556	1
13973	7	30713	0
34376	2	35905	1
27102	6	16764	0
3033	8	35440	1
28007	6	20980	0
7512	0	34607	1
6151	6	17125	0
6615	0	35595	1
32736	10	6690	0
35487	5	35711	1
20016	3	5611	0
35487	5	36879	1
10650	6	18616	0
31977	0	34664	1
12880	7	23445	0
31977	3	34941	1
35532	7	28259	0
17701	2	37673	1
32736	8	31819	0
1648	8	35375	1
7635	7	9800	0
1648	4	34801	1
21636	6	15018	0
16002	0	36550	1
36071	9	30727	0
16002	2	35557	1
17164	7	8694	0
16002	2	35266	1
21309	9	5560	0
30242	4	34446	1
1281	5	37273	0
30242	9	37241	1
18804	0	12822	0
21042	2	36170	1
34076	6	1212	0
31610	5	35506	1
24395	0	37095	0
31610	5	37782	1
23357	3	15786	0
29980	0	35472	1
32845	9	12713	0
35182	1	35391	1
9800	0	14313	0
18478	2	34969	1
15018	4	37115	0
36903	2	36009	1
10439	9	10439	0
14012	3	36817	1
34566	10	26769	0
9778	0	35259	1
1396	3	4855	0
37489	2	37590	1
30075	2	12266	0
37473	2	36247	1
34294	2	34549	0
37473	2	35628	1
24999	2	35788	0
17143	6	35400	1
13642	5	36165	0
14102	0	34997	1
17676	1	5788	0
18565	8	34477	1
36045	6	16450	0
5735	4	34131	1
36922	0	3761	0
8168	0	36944	1
25856	6	21570	0
15628	8	36533	1
18635	5	19919	0
6361	9	37684	1
33762	6	36045	0
34246	6	36052	1
19076	1	7691	0
15045	3	34107	1
20876	3	17873	0
33358	0	36140	1
24298	7	11340	0
17336	6	34576	1
23736	9	20797	0
34660	2	36000	1
17408	5	4225	0
11114	3	34895	1
20664	9	16853	0
21258	0	35199	1
8453	10	5611	0
19659	3	37229	1
8981	5	17311	0
4899	0	37304	1
9712	2	36870	0
34035	2	34271	1
18800	9	5772	0
16815	0	36257	1
25408	8	29942	0
10667	0	36780	1
12169	2	8123	0
35318	4	37377	1
3123	0	34285	0
35318	5	35167	1
34372	9	23016	0
35318	5	34092	1
469	0	9781	0
23968	1	35531	1
7895	3	31613	0
37866	0	34181	1
22975	3	3373	0
23533	0	36218	1
6111	9	26222	0
804	3	36881	1
4627	5	15200	0
26781	1	36650	1
20388	7	22514	0
1604	2	34084	1
34159	3	6844	0
23306	0	35916	1
35249	1	5095	0
2963	0	34069	1
15198	2	3761	0
15254	0	35354	1
26176	7	12880	0
32245	0	35240	1
5575	5	20016	0
32245	6	35379	1
280	8	35041	0
22301	9	34301	1
19471	3	20980	0
22301	9	34995	1
31571	7	23968	0
24764	3	36433	1
28773	0	8782	0
15267	5	35308	1
31066	9	3917	0
36246	0	35945	1
20545	5	1447	0
25030	0	37168	1
19076	9	37069	0
17007	0	36865	1
1175	9	27488	0
36699	0	34601	1
8123	3	37461	0
36699	6	35783	1
19919	4	28751	0
36699	6	33933	1
35046	4	15786	0
10833	3	37402	1
32748	8	5218	0
21335	3	34608	1
13407	7	23016	0
20469	6	34664	1
25707	8	21636	0
30181	0	34223	1
16764	10	34083	0
34762	0	37021	1
27239	0	32139	0
13086	4	35958	1
37368	2	21088	0
16260	5	35782	1
19574	4	14847	0
31784	5	34235	1
16764	3	26259	0
16857	0	37203	1
36887	9	29045	0
35694	2	33934	1
23445	10	15018	0
8681	6	37224	1
14973	6	25348	0
37412	6	36431	1
31613	5	36045	0
5914	5	34510	1
1156	5	12266	0
13858	0	34516	1
12320	9	24647	0
35261	0	34905	1
6125	10	20388	0
27018	0	34685	1
35119	2	4515	0
32182	0	36466	1
36003	2	15353	0
5293	4	35206	1
3986	5	33110	0
5293	4	34179	1
31066	1	9979	0
33126	0	35827	1
23588	7	5086	0
33126	3	34310	1
12320	7	32422	0
4499	6	37122	1
36486	1	5342	0
35278	6	35261	1
23473	9	22025	0
32812	0	34644	1
35259	4	35259	0
15693	0	36196	1
15018	4	29823	0
15693	2	34519	1
28919	5	36041	0
211	0	37441	1
15	9	33762	0
211	2	36793	1
7661	0	7819	0
22571	2	34746	1
5999	2	19610	0
21563	2	37719	1
4576	9	16270	0
9817	0	36347	1
37072	7	8694	0
17809	0	35053	1
6560	7	28763	0
33374	0	35240	1
37588	10	2944	0
30775	3	34310	1
9975	0	12880	0
35909	3	36493	1
21127	2	34785	0
35909	2	34647	1
21211	4	15992	0
35909	2	36630	1
37150	8	8782	0
35909	2	35805	1
32132	9	34728	0
35909	2	36534	1
30382	4	12408	0
35909	2	37501	1
34076	10	16250	0
5361	0	36218	1
36870	2	31160	0
5361	6	35464	1
29841	7	32748	0
24620	2	35803	1
31266	0	25724	0
36302	3	35579	1
33847	9	33951	0
36302	6	35197	1
35119	10	11531	0
36302	6	35450	1
36771	7	36528	0
36302	6	37843	1
20887	3	26176	0
20686	0	36239	1
31571	0	19471	0
9176	0	35218	1
1175	10	27350	0
10450	2	37385	1
6459	10	32312	0
19875	1	34117	1
18851	5	17438	0
24202	5	35934	1
20382	10	20980	0
7054	8	36667	1
96	4	9663	0
36504	4	36504	1
207	6	22514	0
19383	0	36809	1
36019	7	36165	0
19383	4	35995	1
12822	1	28767	0
34023	3	37661	1
20903	8	11873	0
14798	3	36531	1
20388	5	17438	0
36738	3	36499	1
28101	4	10789	0
3998	2	37615	1
30713	2	30727	0
33282	3	36885	1
5957	3	11340	0
37668	3	35874	1
24298	9	21211	0
37668	5	37668	1
17408	10	26259	0
9144	1	35391	1
14992	10	15218	0
21892	0	37132	1
34496	5	1156	0
6336	3	37648	1
4213	6	32107	0
6336	2	36811	1
20656	10	20653	0
6323	2	37536	1
36305	0	25850	0
24888	6	36258	1
5844	4	32216	0
24869	3	34674	1
23314	3	17164	0
4833	3	34381	1
26976	10	8091	0
4833	6	35845	1
37585	10	1281	0
8163	2	34781	1
36019	10	15018	0
8163	2	34532	1
21683	8	6245	0
17129	2	36877	1
24997	7	3978	0
17129	2	36386	1
36140	10	20773	0
37839	2	36208	1
9591	6	24298	0
37839	2	37346	1
13468	9	35770	0
23323	0	34667	1
35195	1	5086	0
25050	2	35107	1
35300	7	35041	0
25050	2	35486	1
18823	8	24863	0
26066	4	35721	1
25174	3	36274	0
3184	4	35475	1
36143	0	17593	0
32402	3	34435	1
32583	7	7895	0
10864	2	36384	1
21588	5	20185	0
36143	5	35687	1
9971	6	12210	0
37015	6	36149	1
23550	6	35446	0
37117	8	34522	1
33941	6	15218	0
37117	5	36356	1
17350	6	33104	0
24850	0	35998	1
7683	7	8759	0
24850	1	37399	1
19076	9	24282	0
29818	0	34137	1
8563	6	15408	0
10300	3	36587	1
26173	2	8787	0
34823	2	35629	1
15786	8	33863	0
30970	2	35324	1
20653	1	26291	0
36438	0	34308	1
26173	6	17061	0
23276	0	35234	1
4044	1	23693	0
29800	0	37203	1
36992	1	9468	0
27308	0	37269	1
36771	0	10967	0
27308	2	34124	1
11194	5	29995	0
37219	0	35404	1
15992	8	36140	0
9812	3	36817	1
20388	5	469	0
6321	0	35958	1
37820	6	11194	0
25797	0	34035	1
36003	8	22975	0
3440	0	37775	1
3743	2	10258	0
5386	2	37334	1
13584	6	27463	0
36084	2	36665	1
20382	10	5788	0
31657	3	34622	1
37069	8	36528	0
19190	2	36451	1
21127	6	24813	0
34345	2	37341	1
28266	4	35912	0
34345	2	34342	1
8563	6	31904	0
34345	2	37292	1
34149	3	18604	0
34345	2	36805	1
26976	4	37048	0
34345	2	35701	1
19209	6	96	0
34345	2	36700	1
21999	2	18522	0
34345	2	35150	1
29706	8	14049	0
34345	2	34593	1
2944	10	35770	0
34345	2	35352	1
2673	8	26813	0
36092	1	36639	1
31514	3	34523	0
4065	0	35975	1
17164	3	36992	0
15645	5	37506	1
10439	6	23968	0
26656	0	37168	1
13463	3	28101	0
20756	0	34067	1
25546	5	37069	0
23476	5	34679	1
35259	5	34126	0
37707	0	35199	1
29942	8	22385	0
37707	3	35576	1
36870	5	22559	0
35933	3	36025	1
18804	0	6111	0
35933	2	37278	1
5966	10	12169	0
25805	3	37329	1
28668	7	3756	0
37456	2	35786	1
31577	1	14582	0
8195	4	37096	1
36292	5	8563	0
23764	0	36671	1
25684	2	23473	0
34506	2	36979	1
19632	6	24997	0
4531	0	36903	1
14786	0	8880	0
37174	4	34874	1
12737	10	35119	0
37174	2	36669	1
11378	8	34456	0
22386	8	36051	1
27796	1	96	0
35824	5	36449	1
20903	1	15694	0
35824	5	35510	1
20331	1	18577	0
24575	4	35361	1
18577	8	20773	0
20073	0	35935	1
12169	7	19471	0
20921	3	34107	1
33673	1	37368	0
20921	6	34210	1
32845	2	36745	0
2164	0	37847	1
17554	2	5951	0
2164	2	37416	1
28763	7	29841	0
2164	2	35733	1
36528	8	34113	0
36937	6	35138	1
36071	9	20016	0
36937	6	35624	1
17004	3	31577	0
36937	6	34307	1
8453	4	8018	0
29242	0	37720	1
34549	10	3243	0
36264	3	34734	1
6080	0	12266	0
36264	2	34128	1
13463	5	31904	0
4493	4	34367	1
31579	9	30075	0
29965	6	36996	1
35720	1	22514	0
12206	2	34641	1
8583	4	30702	0
12206	2	34245	1
32312	3	37862	0
10130	2	36460	1
33950	10	6151	0
11666	3	36166	1
4855	3	7495	0
11666	6	35948	1
35041	3	1396	0
34878	0	37612	1
21088	1	1438	0
34878	3	35248	1
22120	1	15641	0
33045	0	36750	1
34099	5	6111	0
35293	8	37345	1
4855	3	17738	0
35293	8	37852	1
23968	7	35912	0
15247	0	37485	1
37585	8	15200	0
15247	2	37592	1
37069	6	19767	0
5055	3	34021	1
28266	3	29942	0
34374	9	34779	1
20545	8	28919	0
34374	9	35209	1
26173	1	31066	0
34374	9	34615	1
36396	9	8563	0
34374	9	34872	1
5249	4	13806	0
34374	9	35081	1
31904	5	6320	0
34374	9	34433	1
33950	9	11850	0
34374	9	34198	1
33764	0	34872	0
34374	9	35481	1
33983	0	26173	0
34374	9	34582	1
20656	5	35454	0
34374	9	35149	1
14106	5	21405	0
34374	9	35719	1
12822	8	35374	0
34374	9	34141	1
19767	10	20953	0
34374	9	34778	1
14871	10	7683	0
34374	9	35754	1
20360	4	26171	0
34374	9	37339	1
34587	5	21197	0
34374	9	37528	1
37151	2	32738	0
34374	9	33975	1
9644	1	37115	0
34374	9	33884	1
3917	6	37136	0
34374	9	36266	1
17408	6	3633	0
34374	9	37865	1
28101	7	15408	0
34374	9	34529	1
37115	10	14752	0
34374	9	35564	1
33863	4	3917	0
34374	9	36372	1
36396	4	23314	0
34374	9	36528	1
28305	5	36274	0
34374	9	35343	1
20664	0	19255	0
34374	9	36142	1
36745	4	30714	0
34374	9	37301	1
34285	2	25027	0
34374	9	35424	1
20185	3	25850	0
11716	0	35363	1
23016	3	30410	0
15725	5	36516	1
3743	2	20360	0
15725	5	35832	1
13642	9	28132	0
10130	2	35437	1
13283	0	21405	0
16785	0	36660	1
9468	6	23145	0
4784	0	36766	1
5999	7	35532	0
4784	4	36712	1
12713	2	5951	0
37091	0	34751	1
15224	8	35706	0
19395	0	36906	1
10174	8	37136	0
34392	2	36566	1
13209	4	17375	0
20397	0	36497	1
25174	4	13392	0
16687	3	37503	1
34285	4	20234	0
34744	6	37791	1
2333	9	4855	0
25343	0	37469	1
33764	4	11817	0
34600	0	37728	1
14313	10	23445	0
7143	4	36145	1
34872	2	24395	0
7143	2	35052	1
36292	0	20156	0
36597	8	37586	1
34096	10	5611	0
36597	4	36636	1
35300	2	26222	0
16527	0	34668	1
1156	10	36396	0
16527	6	34275	1
15224	5	32139	0
7010	0	36977	1
27906	6	13407	0
25287	0	37348	1
19319	4	36019	0
19357	2	36395	1
469	1	37546	0
25450	0	35036	1
18577	10	24863	0
25450	3	36063	1
29995	3	36013	0
24579	2	35653	1
24118	7	31579	0
24579	2	34690	1
11123	0	32107	0
16095	2	36575	1
10996	6	22869	0
16095	2	36464	1
34954	4	22120	0
24428	1	35715	1
9781	5	4627	0
15499	3	34010	1
37670	3	11039	0
10505	0	37691	1
34285	0	21570	0
10505	3	36946	1
30085	8	2384	0
37669	0	34114	1
1479	9	3123	0
32379	0	36693	1
12036	9	8453	0
32379	3	35226	1
35581	8	27463	0
16402	4	36336	1
35497	4	32997	0
14466	0	36218	1
37461	2	8123	0
14466	6	37510	1
26176	5	5946	0
8689	8	34794	1
5946	8	4830	0
30113	0	35698	1
18828	9	11677	0
34187	5	37475	1
11625	10	25698	0
12856	4	35071	1
34454	4	20016	0
7561	4	37449	1
35046	1	280	0
18726	0	35168	1
24282	7	35590	0
18726	2	34888	1
23968	5	16853	0
18726	2	35615	1
24647	5	31025	0
18726	2	37664	1
19919	0	31491	0
35143	10	34698	1
16270	4	16270	0
35143	5	33971	1
29942	8	25408	0
28028	0	35976	1
1447	3	20382	0
14523	0	34429	1
30702	3	35454	0
23962	3	34728	1
35041	3	4323	0
13285	0	36454	1
15992	8	14973	0
13285	2	35111	1
23693	0	34106	0
13285	2	35070	1
32082	5	11340	0
13285	2	34056	1
15913	8	12210	0
26816	3	35950	1
4028	8	18604	0
26816	6	35383	1
32583	0	35446	0
25454	3	35272	1
34294	7	20064	0
8382	1	35029	1
18577	1	21211	0
25392	0	37470	1
35788	1	28773	0
37337	0	36130	1
21891	7	4225	0
37337	3	35579	1
2260	8	15588	0
37337	6	34288	1
12210	1	28706	0
37337	6	36973	1
35134	5	13150	0
37337	6	35776	1
13580	7	22869	0
37337	6	37579	1
7635	3	34785	0
37337	6	35210	1
23445	8	21115	0
26163	5	35692	1
11378	2	21127	0
23653	6	34151	1
7895	10	32422	0
8367	0	34184	1
7691	7	22514	0
21536	6	36761	1
13973	0	37580	0
37208	3	34944	1
36617	1	20773	0
2755	3	34309	1
18577	10	32107	0
1807	2	37248	1
4830	4	29945	0
15586	3	35807	1
37750	9	23588	0
6905	0	36017	1
2260	6	28763	0
6597	2	35601	1
27350	3	1175	0
31639	6	35488	1
36045	4	36045	0
21976	0	35439	1
35435	6	7635	0
11764	0	37168	1
30342	6	26176	0
24742	5	37718	1
35259	2	34333	0
30248	2	34959	1
23369	10	36396	0
37572	2	36094	1
36179	10	32748	0
37572	2	34157	1
8563	4	12822	0
37572	2	36088	1
5966	7	19255	0
37572	2	35285	1
37439	0	18752	0
37572	2	37069	1
34954	5	36274	0
36407	8	34197	1
1175	4	35041	0
36407	5	35065	1
8782	2	36887	0
[truncated: 2,620 more rows]
