# Supplementary material
Source: ML conference proceedings conference paper supplement (https://proceedings.neurips.cc/paper_files/paper/2021/hash/0fd600c953cde8121262e322ef09f70e-Abstract.html)
Supplement: Supplementary file 1 [file 0fd600c953cde8121262e322ef09f70e-Supplemental.zip › Supplementary_Material_Paper_8745/data/Hamaguchi-BM_tail-5000/test/test-random-sample/test9.txt]

27290	0	37670	1
14992	5	5218	0
6123	2	35896	1
18823	1	18577	0
29082	2	35978	1
9663	9	10599	0
35445	0	33886	1
25724	3	35041	0
36817	6	37300	1
36870	4	35446	0
36817	2	37695	1
10992	9	35816	0
36817	6	34740	1
25027	3	15992	0
36817	6	34052	1
33229	8	16559	0
36817	6	36201	1
17731	1	6514	0
36817	6	36969	1
5928	7	36165	0
36817	6	35855	1
23016	6	9468	0
36817	6	37088	1
3985	7	26970	0
36890	8	36533	1
11137	0	21165	0
576	0	34223	1
34728	10	36396	0
576	6	34772	1
37507	1	30403	0
24401	0	36347	1
34333	6	10650	0
24401	3	35525	1
36617	1	9313	0
25448	9	35764	1
20887	2	30342	0
33920	6	34422	1
34149	8	36617	0
11642	6	35757	1
11625	6	19343	0
13620	0	36482	1
29329	1	30075	0
37446	0	37609	1
8759	10	26769	0
37446	2	35816	1
2451	5	30075	0
34295	5	37381	1
13292	5	28919	0
34295	5	35992	1
29352	7	28763	0
34295	5	35849	1
19108	5	35311	0
26855	4	36251	1
1175	7	434	0
33314	1	34273	1
37672	4	22416	0
19162	4	36686	1
36019	2	30994	0
8687	4	35100	1
35134	4	13350	0
16004	3	36937	1
2333	8	27929	0
13974	0	37727	1
8563	9	17961	0
539	2	35147	1
5951	9	1149	0
19409	2	36111	1
15260	3	30876	0
19409	2	37628	1
23588	9	23968	0
28727	1	37832	1
28016	8	20953	0
28589	0	37030	1
36331	1	7445	0
28589	2	36376	1
11566	0	11405	0
28589	2	35934	1
622	8	1396	0
5827	0	37646	1
2737	8	13759	0
20248	5	35498	1
883	0	16389	0
20151	4	35468	1
10946	9	22619	0
8081	1	37759	1
28873	4	1392	0
23427	3	34234	1
15200	7	6844	0
33211	0	36388	1
9663	2	7819	0
35982	0	35515	1
30075	9	37580	0
35982	3	36368	1
5339	5	14345	0
35982	6	34764	1
36870	3	30351	0
15223	1	37823	1
34802	9	1396	0
29857	0	34039	1
37368	1	33673	0
10516	6	34380	1
32438	4	35011	0
34027	2	35825	1
37483	1	21431	0
34027	2	36620	1
25488	5	25174	0
34027	2	36067	1
3633	2	6560	0
34027	2	37176	1
33584	9	7895	0
34027	2	36389	1
17893	3	35932	0
34027	2	34539	1
35259	9	10439	0
12533	0	35199	1
7661	0	28266	0
16284	1	37022	1
37348	3	32082	0
20236	2	33923	1
13292	4	16270	0
34327	2	37678	1
15260	0	22295	0
11507	3	35739	1
10174	8	6164	0
28262	6	37397	1
33762	8	20331	0
28262	6	36081	1
15200	3	37368	0
28262	6	35268	1
35770	3	37273	0
28262	6	35346	1
35868	6	17731	0
28262	6	36724	1
31579	9	25545	0
33440	0	34306	1
6979	3	32873	0
28459	0	36292	1
37301	1	30422	0
35122	2	34238	1
16050	6	36016	0
37211	3	36963	1
19343	1	22559	0
9719	0	37539	1
14158	7	36143	0
8782	6	35116	1
28767	9	28767	0
14655	2	33840	1
9366	2	33863	0
34791	2	34172	1
10996	0	36922	0
34791	2	37846	1
37348	2	32107	0
34791	2	34505	1
19076	9	16539	0
34791	2	34985	1
36003	1	20349	0
34791	2	34675	1
26155	0	26879	0
5421	2	36948	1
34549	7	5844	0
33571	0	36482	1
19343	0	34523	0
30139	3	35283	1
6645	6	168	0
16019	3	36842	1
20185	9	10174	0
17951	0	36242	1
36486	0	20265	0
35596	2	37784	1
30876	2	34771	0
34895	3	34803	1
18504	0	2333	0
34895	6	36891	1
901	3	26173	0
34895	6	34171	1
12036	0	6151	0
34895	6	37311	1
37388	8	11405	0
34895	6	35312	1
14117	0	13524	0
34895	6	35184	1
1757	7	1757	0
34895	6	36080	1
33393	4	29717	0
34895	6	34512	1
4213	8	28349	0
34895	6	34886	1
14362	1	25693	0
34895	6	35228	1
24819	2	19971	0
34895	6	34358	1
16458	3	12788	0
31324	0	35422	1
20797	10	35743	0
6867	2	34351	1
20887	0	26155	0
2244	0	36218	1
10992	4	28287	0
17279	0	37720	1
8324	7	20653	0
17279	3	34513	1
333	2	19076	0
7270	0	37203	1
6844	9	36412	0
37513	6	35970	1
31904	10	17554	0
17543	4	34295	1
21159	5	9781	0
21684	5	37856	1
34456	4	25820	0
21684	9	37307	1
4515	8	9818	0
34700	2	35592	1
33983	8	28258	0
34700	2	34809	1
34757	6	5339	0
13048	3	34155	1
1786	6	7973	0
5829	0	35112	1
37095	9	22787	0
5829	1	34199	1
3254	7	24810	0
34563	2	35050	1
23909	6	19601	0
33634	5	34134	1
5996	10	34493	0
4906	4	36923	1
10650	4	31163	0
11168	2	36443	1
15538	5	595	0
21425	6	36561	1
34265	6	32601	0
21425	6	36256	1
10967	3	34106	0
22003	4	37786	1
11135	6	25856	0
24257	0	35827	1
27390	0	34672	0
1826	1	35029	1
19343	3	20773	0
18234	3	36945	1
938	6	35816	0
13506	0	34540	1
9366	2	25488	0
2496	0	34500	1
31160	7	35532	0
32994	0	36436	1
35300	1	27929	0
2324	4	36348	1
1487	8	8563	0
7065	6	36066	1
14485	10	35964	0
18855	3	35333	1
20156	4	21431	0
841	0	34988	1
12737	1	7661	0
30705	0	37211	1
37546	3	31962	0
16688	8	33927	1
13513	1	4512	0
16688	1	35531	1
24810	7	18425	0
22197	0	36388	1
434	0	27929	0
22197	3	37807	1
32997	5	6059	0
37304	2	37452	1
9644	9	23338	0
37304	2	34947	1
33904	9	9764	0
2204	0	37143	1
21127	9	14752	0
12693	2	35301	1
36125	6	5378	0
3530	0	35363	1
14611	4	32581	0
22552	4	35918	1
20876	4	25698	0
24027	0	37102	1
207	10	23693	0
1186	2	35596	1
34802	4	24395	0
13351	0	35827	1
13392	6	17350	0
30303	0	36380	1
35311	8	16458	0
37616	8	34197	1
10967	0	36179	0
37616	5	34747	1
12218	4	21039	0
37616	5	35633	1
18635	2	24813	0
16285	2	35677	1
17311	3	8981	0
32566	2	35573	1
35743	1	19360	0
32566	2	37582	1
26291	2	25209	0
33320	0	37470	1
883	0	29717	0
33320	6	37735	1
16250	7	25560	0
36683	2	37703	1
32581	2	13851	0
20467	6	36602	1
12784	4	30595	0
36018	4	36018	1
5560	5	30422	0
17163	6	34014	1
35581	8	35272	0
22080	4	35773	1
5095	0	8759	0
4808	0	36334	1
31066	3	8787	0
6843	0	36188	1
33762	9	11625	0
34500	2	37755	1
1447	7	18800	0
34500	2	33978	1
34695	1	36331	0
25447	0	37570	1
4044	2	30403	0
29415	3	36717	1
22295	8	2111	0
35113	1	36989	1
24247	4	6514	0
31889	2	36751	1
14582	1	34333	0
31889	2	35713	1
28287	9	30898	0
31889	2	37589	1
36179	6	25546	0
3516	1	37667	1
25546	0	14992	0
32074	4	36784	1
9138	8	35964	0
15081	9	36021	1
30621	6	8751	0
15081	9	37711	1
26994	7	14106	0
15081	9	35445	1
6198	6	36528	0
13877	5	34966	1
1888	1	13584	0
8533	3	36030	1
33847	1	34785	0
1150	5	35602	1
23473	8	36165	0
34475	6	36126	1
23494	8	25338	0
1354	5	34718	1
18616	2	26131	0
27456	2	34163	1
11895	4	20369	0
4377	9	36215	1
24298	3	11039	0
4377	9	36838	1
14158	1	29352	0
11651	0	37348	1
16157	2	6410	0
37766	0	36914	1
13524	7	9819	0
25850	5	34484	1
12031	0	6514	0
10448	4	34411	1
35111	0	34265	0
18185	8	36190	1
25820	6	36922	0
30629	5	35242	1
34587	5	5086	0
23406	0	36388	1
37670	7	9715	0
5436	4	35612	1
16338	5	36992	0
7775	0	36388	1
8583	8	9971	0
28777	0	34897	1
36921	1	1326	0
29692	2	36666	1
16270	9	36041	0
14201	3	37514	1
11864	0	4213	0
804	4	37377	1
32139	7	20872	0
804	3	36458	1
6320	6	35804	0
804	5	36510	1
32722	4	37512	0
804	5	35519	1
28132	4	17852	0
9545	0	37130	1
14146	4	14973	0
37789	0	34601	1
19209	2	31350	0
19219	6	34176	1
2451	7	17125	0
29581	4	35582	1
5966	6	16853	0
5379	0	34579	1
25488	1	5623	0
15404	0	34812	1
28349	0	9971	0
16771	0	34149	1
35334	1	6496	0
13422	2	34955	1
28668	1	13806	0
37356	2	35607	1
15218	9	28016	0
37356	2	37575	1
4830	0	5946	0
20851	0	36347	1
34100	8	23363	0
35160	6	37100	1
29823	7	3761	0
6992	4	37767	1
28132	6	32997	0
6992	6	37232	1
34577	5	34113	0
10676	3	36167	1
5761	3	34640	0
10676	2	35038	1
14786	2	16450	0
10676	9	35747	1
34523	4	13759	0
13152	2	37457	1
36331	7	4512	0
21897	3	37080	1
33951	2	23936	0
1557	2	35539	1
24395	6	36887	0
1557	2	37796	1
3743	8	31603	0
37801	2	34398	1
25545	2	34265	0
17777	9	36456	1
6125	4	35770	0
16993	0	34802	1
4205	7	20419	0
1762	6	35115	1
34332	8	21850	0
30115	0	35691	1
32738	0	31491	0
30115	2	34686	1
8186	1	15992	0
30115	2	35148	1
26976	7	28811	0
30115	2	35345	1
883	2	34648	0
31201	0	36347	1
8839	0	6514	0
22179	0	34369	1
20887	2	26155	0
22179	2	37645	1
30382	10	35259	0
35556	2	36132	1
35119	7	26131	0
29390	0	36899	1
15588	0	37368	0
35865	0	36347	1
6546	3	7635	0
19174	0	34223	1
8727	7	17327	0
16477	0	37539	1
35062	7	12662	0
16477	3	35699	1
1447	8	4515	0
16451	1	35815	1
16539	3	37273	0
25063	2	37249	1
4323	1	7495	0
25063	2	34915	1
23821	4	30910	0
36051	2	34202	1
37657	6	34333	0
36051	2	34278	1
4504	0	23787	0
36051	2	37347	1
20903	4	23736	0
36051	2	37215	1
35373	6	7352	0
36051	2	36325	1
36143	4	10967	0
36051	2	35877	1
30727	6	15353	0
36051	2	34655	1
18604	9	11135	0
36051	2	37167	1
13463	7	15246	0
36051	2	35730	1
37750	2	7699	0
36051	2	35559	1
5844	1	13468	0
36051	2	36774	1
36029	8	14345	0
8920	0	36347	1
17016	3	21725	0
10951	0	34030	1
23736	3	9366	0
35640	4	36265	1
1212	5	30702	0
11679	0	36347	1
36071	4	6080	0
11679	6	33948	1
20223	5	31819	0
11679	6	36604	1
21725	0	16509	0
34010	6	37129	1
19319	1	7635	0
34010	6	35830	1
32147	1	36771	0
34010	6	35603	1
18504	10	37150	0
34013	0	33868	1
37698	6	16223	0
6667	2	33906	1
5844	9	4627	0
6667	2	36077	1
13407	6	32601	0
6667	2	35319	1
35770	6	2944	0
1577	2	35536	1
11864	7	12210	0
33180	2	36362	1
35311	0	30898	0
24800	2	34569	1
3761	7	6245	0
35248	6	34878	1
33983	10	15224	0
15752	3	37677	1
15641	4	34577	0
7435	4	37763	1
11194	6	17554	0
32177	0	37126	1
4213	4	31631	0
11886	5	37557	1
31571	8	16033	0
27649	8	34590	1
36292	3	96	0
3136	3	33925	1
19767	3	17408	0
26006	2	34397	1
9712	3	31603	0
26006	2	35672	1
127	5	34757	0
18901	2	36830	1
18690	9	27470	0
35986	1	34169	1
16250	2	13392	0
37084	4	34286	1
17873	9	33762	0
37084	2	36675	1
34728	1	23016	0
37084	2	35895	1
35439	10	35334	0
37084	5	36720	1
18635	1	36019	0
37084	5	34833	1
35259	0	23588	0
15284	3	33932	1
1980	6	32873	0
33922	6	36385	1
28349	3	11340	0
9473	6	35142	1
23550	5	33584	0
3537	0	37102	1
6496	1	127	0
3537	2	36670	1
35858	9	14548	0
34071	3	37478	1
23787	3	6979	0
32013	0	36991	1
6844	8	17408	0
8116	4	35854	1
21127	8	34785	0
36098	0	37269	1
34672	2	36085	0
5468	0	34091	1
21814	0	23590	0
25691	0	35089	1
28101	3	1156	0
31761	1	35230	1
37011	7	34285	0
13938	0	34016	1
22787	4	8344	0
24980	8	36246	1
30595	4	22527	0
10457	2	34521	1
2384	5	35720	0
37127	0	36034	1
2246	2	11137	0
17541	0	36218	1
1447	5	16853	0
17541	6	36492	1
30876	0	24810	0
35791	6	34071	1
15198	9	18635	0
11697	0	35677	1
25209	9	8583	0
8221	2	34788	1
28305	4	19632	0
37081	2	37081	1
12210	2	21158	0
27546	0	37866	1
10807	1	13209	0
26612	0	36210	1
1438	3	36143	0
18261	4	33930	1
3985	9	33878	0
11309	6	35233	1
20460	6	3985	0
11309	6	37089	1
17676	1	29265	0
34357	0	34668	1
19517	4	35788	0
18919	2	34470	1
7645	0	24863	0
2779	2	35232	1
26786	10	35272	0
26570	0	37179	1
3123	10	25505	0
26570	2	34096	1
32845	10	36992	0
1019	6	34279	1
21935	4	35385	0
34118	2	35799	1
12293	8	36013	0
34118	2	34675	1
5339	3	28873	0
34118	2	36893	1
34954	1	8447	0
34118	2	34001	1
33086	9	33878	0
34118	5	34412	1
35804	4	1156	0
34118	2	35484	1
37151	0	29879	0
32105	0	36617	1
25174	6	12210	0
8017	2	36229	1
10526	6	6459	0
8017	2	37236	1
9800	0	6546	0
13480	0	35827	1
30382	2	35518	0
24749	6	35899	1
4627	4	5	0
24749	6	36216	1
24647	8	34105	0
24749	6	36273	1
5342	4	20876	0
24749	6	34835	1
2673	0	8908	0
32703	5	34900	1
21068	2	168	0
27542	6	36010	1
22025	3	19186	0
22435	4	35709	1
17488	6	26176	0
8111	6	37620	1
14582	2	28811	0
34840	0	36550	1
36071	9	13973	0
30001	3	36733	1
19601	8	3985	0
34349	4	36353	1
23693	5	2260	0
29064	4	34446	1
16539	6	15588	0
32781	0	34683	1
34728	4	5575	0
36334	0	35332	1
31276	7	14871	0
35354	2	35789	1
9490	2	4504	0
35354	2	37060	1
11123	2	17016	0
35354	2	34681	1
35564	2	29913	0
35354	2	34807	1
32422	5	26222	0
35354	2	36158	1
3294	9	12765	0
35354	2	36827	1
7973	3	17893	0
35354	2	34285	1
35187	4	20876	0
35354	2	36199	1
18828	2	11378	0
35354	2	36765	1
1392	0	33845	0
35354	2	36339	1
36013	1	37580	0
31400	0	36611	1
3770	6	22810	0
4570	2	36479	1
33951	0	26155	0
23704	9	35645	1
10431	6	32736	0
23704	9	34875	1
18577	8	21570	0
18503	5	34581	1
1149	8	247	0
23638	2	36848	1
8908	5	18425	0
27901	2	36929	1
26166	5	36624	0
27901	2	35327	1
24488	6	18851	0
27901	2	37473	1
9131	3	35912	0
35225	0	37067	1
9191	10	26131	0
30793	8	34345	1
9663	5	22385	0
13419	3	36486	1
28438	2	2333	0
22527	0	36218	1
4325	1	11274	0
25374	2	36461	1
12218	3	127	0
28442	2	36023	1
9644	8	21636	0
6720	3	35576	1
1438	10	22514	0
15084	6	35302	1
11531	3	8091	0
3284	2	37757	1
16539	10	3633	0
3284	2	34105	1
34149	6	19343	0
12629	0	35199	1
36019	9	3373	0
6891	2	35702	1
14752	9	34456	0
6891	2	36716	1
34285	7	20265	0
30260	8	35375	1
37512	6	5901	0
30260	5	34595	1
36870	7	35446	0
37650	0	35740	1
7973	6	36959	0
25526	0	35422	1
25203	5	13358	0
25526	3	37299	1
3758	0	10650	0
34275	6	35478	1
25698	7	35187	0
34275	6	36248	1
31242	9	14232	0
30963	0	37470	1
34493	7	23338	0
30963	3	35795	1
36922	4	32736	0
666	2	35480	1
1876	1	21159	0
35156	4	34295	1
21115	5	32738	0
35156	5	35143	1
28767	3	37301	0
35156	5	35045	1
2451	4	23314	0
3437	4	34795	1
24819	3	938	0
3437	5	34933	1
33950	4	12293	0
12886	5	35640	1
20953	7	17408	0
32474	2	36047	1
23313	6	26786	0
13254	2	37042	1
5339	1	6979	0
20181	2	36767	1
32122	8	34332	0
36566	0	34392	1
6166	5	36016	0
19647	3	35791	1
622	8	622	0
19647	10	37516	1
30262	5	32722	0
19647	5	36032	1
29841	1	3243	0
2842	0	34231	1
14992	7	15218	0
25298	0	35827	1
24488	5	6125	0
27835	4	34866	1
32004	1	19209	0
37553	4	35833	1
32220	2	13468	0
28571	0	37288	1
33863	3	31066	0
28485	5	36570	1
36331	7	34058	0
8098	3	36291	1
8880	6	20331	0
11396	5	36847	1
13463	6	8453	0
34951	3	36817	1
7250	1	26480	0
27050	2	35680	1
37167	6	23695	0
30525	8	34114	1
16223	10	20980	0
3397	2	34196	1
9663	4	10599	0
733	0	35529	1
32107	9	9979	0
17972	0	35515	1
24298	4	22559	0
36068	3	37175	1
3201	5	28874	0
35856	0	35365	1
7288	6	17375	0
23074	3	37056	1
35571	7	25820	0
31155	0	36206	1
35454	8	12210	0
36985	4	34793	1
21496	0	879	0
34807	6	37135	1
32312	5	7645	0
18432	1	35391	1
21309	0	10807	0
1163	0	36589	1
4205	1	36019	0
1163	5	36791	1
18828	5	29879	0
12859	0	34630	1
11274	3	18690	0
12267	0	37612	1
8186	10	28668	0
6734	0	37436	1
2260	6	26625	0
36242	0	36163	1
14992	1	4627	0
35055	3	36312	1
18828	2	6690	0
37350	2	37076	1
8694	10	31276	0
34093	8	37572	1
35518	9	37698	0
34093	5	35977	1
15332	4	11121	0
37700	2	37024	1
33160	7	24568	0
37700	2	36660	1
20656	4	16250	0
23292	2	35728	1
18504	9	280	0
29039	0	37599	1
37820	7	32845	0
17242	3	33851	1
25923	10	34332	0
8105	2	36749	1
35374	3	17311	0
5354	2	37631	1
19767	5	32748	0
34285	3	35561	1
14639	0	35706	0
29345	1	34117	1
23821	7	2246	0
9711	2	34993	1
22559	7	25856	0
9711	2	35725	1
36122	8	35062	0
22835	0	35422	1
12784	8	168	0
11732	3	36978	1
883	0	35648	0
11732	6	33920	1
6546	1	33951	0
11732	6	36544	1
36992	0	31276	0
11732	6	35458	1
11864	8	33983	0
18075	0	33951	1
32581	4	35648	0
26828	0	37295	1
35541	5	7683	0
35953	0	35034	1
34076	9	33044	0
29478	2	36425	1
8759	10	13463	0
24037	0	36218	1
33904	10	30165	0
33393	3	35639	1
5946	7	6059	0
8852	3	37293	1
11135	10	32422	0
18997	5	35357	1
1487	9	9606	0
18997	5	34058	1
23821	2	11137	0
23806	0	37470	1
25856	9	20360	0
34045	2	37094	1
35446	6	31603	0
22155	2	36681	1
34083	6	33941	0
36357	8	34197	1
6933	7	6166	0
36357	5	35633	1
15260	5	32928	0
36357	5	35533	1
37260	3	15018	0
37118	2	34000	1
13851	7	5802	0
36193	5	36813	1
10476	6	17004	0
1558	0	35902	1
14992	4	8782	0
2254	2	37375	1
901	8	9971	0
33377	3	35015	1
21957	8	36624	0
33808	3	35222	1
12519	9	17364	0
7699	6	36697	1
8018	7	34496	0
19170	0	34293	1
13584	4	26786	0
21122	3	37268	1
9975	10	19186	0
21122	6	36823	1
35518	8	28811	0
26460	0	37305	1
8583	7	32139	0
19120	3	37093	1
21570	4	17364	0
19120	6	35066	1
7683	0	14548	0
19120	6	37676	1
36016	2	28010	0
36368	6	35982	1
34523	5	5249	0
36368	6	35495	1
5772	3	31577	0
18024	0	34045	1
15408	6	18323	0
29848	2	37118	1
19186	4	26155	0
37649	2	37364	1
20545	2	5772	0
37649	2	37619	1
2111	6	6410	0
19305	6	36294	1
23787	5	9781	0
11761	0	36093	1
5802	4	6410	0
11761	2	37534	1
20773	4	28139	0
11761	2	36762	1
37580	6	23016	0
4233	3	34023	1
35581	0	6111	0
31199	2	35435	1
16559	8	21039	0
30795	2	34327	1
34058	7	15177	0
34030	2	36961	1
8018	0	23369	0
31613	2	37776	1
17738	9	34831	0
25617	2	35448	1
27239	8	31631	0
20768	0	35780	1
35912	8	13150	0
36081	6	37214	1
25698	3	12320	0
28404	3	37423	1
25923	6	5378	0
11567	0	35354	1
28811	8	19255	0
1145	3	34979	1
8091	4	18616	0
24732	6	35788	1
20895	6	35057	0
2173	4	34801	1
33995	7	36003	0
23780	4	36923	1
11378	9	20349	0
32160	2	36897	1
207	1	37588	0
32160	2	36843	1
5249	1	18577	0
25725	5	35046	1
10789	7	12293	0
4208	2	34306	1
15177	4	34695	0
26506	0	36514	1
23787	2	33845	0
36440	3	36471	1
34265	7	32223	0
34365	2	34378	1
2260	4	11695	0
34365	2	36205	1
21039	6	33229	0
34365	2	33914	1
15694	6	20653	0
23956	0	35494	1
34372	9	9468	0
317	0	35214	1
32845	7	8453	0
34961	2	36645	1
7635	0	6690	0
36127	3	36063	1
11340	9	20903	0
26981	0	36454	1
15218	5	1281	0
9733	5	35883	1
21725	10	16389	0
9733	5	34596	1
7250	9	25693	0
9733	10	37523	1
11850	7	36745	0
25151	3	36696	1
27529	0	33458	0
736	0	37428	1
12784	2	33393	0
22158	0	35529	1
8635	3	31025	0
19128	0	36658	1
35454	10	18577	0
12121	0	36600	1
2451	6	30713	0
33506	4	36798	1
19186	5	13642	0
4771	0	36098	1
12855	10	2465	0
9700	0	37555	1
34523	9	25505	0
9700	5	34111	1
6459	1	17676	0
5523	0	37770	1
19076	3	25546	0
5523	0	37571	1
33863	3	20656	0
16701	6	36873	1
1149	2	24831	0
24851	6	35589	1
30316	1	19319	0
37586	2	36752	1
35334	6	37577	0
6180	2	34030	1
35046	9	4855	0
6180	2	35158	1
26813	3	33584	0
6180	2	35161	1
34294	3	1757	0
28980	2	34393	1
35334	1	6496	0
14222	0	35108	1
37585	7	29598	0
14222	2	37260	1
5623	0	4804	0
14222	2	34494	1
30085	6	2944	0
14222	2	35604	1
12822	8	24999	0
14222	2	37113	1
36617	3	35532	0
35977	5	34024	1
15694	7	15641	0
35977	5	36059	1
16784	7	34113	0
35977	5	34544	1
33319	10	34265	0
35977	5	36097	1
34999	4	1695	0
35808	0	36379	1
11695	4	24488	0
24161	2	35828	1
15641	6	24997	0
24161	2	33836	1
1005	10	20656	0
36110	6	35807	1
36887	10	34831	0
15037	3	35576	1
17877	0	14786	0
28789	3	35346	1
9764	8	17022	0
29773	0	36787	1
32722	2	23936	0
35650	0	37539	1
7445	10	36122	0
2097	0	34443	1
3311	0	21588	0
2097	9	37391	1
3468	9	31242	0
2097	9	36139	1
13350	5	20382	0
32689	0	37658	1
6048	5	6048	0
18833	5	34383	1
20016	10	7683	0
18833	5	35221	1
13851	2	14058	0
18833	5	37047	1
5218	1	34294	0
2618	2	36763	1
32843	2	6847	0
2618	2	34479	1
28596	6	37167	0
33519	0	36125	1
13665	7	7352	0
12184	6	37234	1
9418	5	3254	0
246	2	37318	1
31160	6	2673	0
9414	4	37786	1
15992	3	7895	0
34801	5	34938	1
6459	5	8787	0
34801	10	35176	1
35057	3	30262	0
4835	0	34967	1
18577	0	34076	0
26628	0	36484	1
14362	4	24568	0
32254	0	35461	1
6496	0	13513	0
32254	2	36557	1
34375	9	8981	0
2764	0	35914	1
34159	2	34106	0
35069	0	35594	1
34999	3	13283	0
13767	0	34562	1
25856	5	31160	0
18395	3	35576	1
2359	4	21637	0
34251	5	37386	1
22796	9	22911	0
32977	6	36342	1
23550	0	1460	0
37590	0	37489	1
23145	5	35392	0
28923	3	35250	1
21725	10	8908	0
21027	0	35871	1
19517	3	31266	0
21027	2	37496	1
21850	7	21903	0
22201	0	34369	1
35134	2	35912	0
5541	3	34044	1
34802	8	34502	0
31794	0	37143	1
34106	8	37588	0
34529	1	34374	1
36179	10	26259	0
27374	0	36054	1
30727	10	30410	0
27374	2	34805	1
30595	4	18425	0
22024	3	37838	1
18616	1	10439	0
12871	0	34003	1
20419	9	34785	0
23908	8	37801	1
20903	7	15538	0
23295	0	37168	1
23357	6	23357	0
486	0	34069	1
37657	0	31796	0
486	3	35346	1
2673	5	1479	0
12203	0	35586	1
33584	8	34290	0
12203	4	33866	1
17004	2	31571	0
23352	0	34116	1
6320	8	37820	0
9459	2	36459	1
28668	2	36045	0
9459	5	34633	1
37698	6	37048	0
33162	0	34763	1
5560	3	1888	0
13748	1	35018	1
34577	5	8727	0
18504	4	35347	1
5844	9	34294	0
5969	0	37098	1
34587	3	9818	0
37728	0	36117	1
35581	7	28773	0
19924	2	37191	1
19209	6	31845	0
22978	0	37246	1
19971	6	25923	0
35021	4	35330	1
34018	5	13509	0
6119	0	35306	1
13524	7	6080	0
34183	0	36388	1
3468	7	22416	0
33039	2	34640	1
17022	1	4325	0
25842	0	35876	1
35111	9	28005	0
16497	0	37130	1
7352	0	23787	0
755	0	35191	1
28005	6	20369	0
755	3	34557	1
12218	4	32873	0
35514	0	36287	1
34372	3	34454	0
33113	1	36856	1
15213	7	27390	0
35351	0	34030	1
32312	2	28258	0
17484	0	34340	1
21115	3	9644	0
35879	5	34122	1
12218	1	16017	0
7266	1	34362	1
21431	0	35041	0
19788	0	34379	1
16017	10	9490	0
1158	6	35502	1
7683	9	33950	0
34102	2	36313	1
35912	2	13150	0
34102	2	35838	1
35812	4	23821	0
17973	0	36263	1
11121	3	34290	0
14631	0	37494	1
37588	7	15588	0
19141	6	36588	1
25545	5	13973	0
37529	2	35919	1
13407	5	32122	0
35475	0	35974	1
7819	1	96	0
35475	1	35391	1
13468	7	28016	0
31854	0	36230	1
20545	2	4515	0
19930	4	34165	1
31654	6	32873	0
20815	0	37336	1
14201	5	11039	0
532	0	37595	1
8727	5	6933	0
21184	3	37708	1
29879	7	17852	0
37661	3	35033	1
7661	0	28919	0
37661	6	34023	1
24247	4	24896	0
37832	2	34106	1
34648	2	24896	0
37832	9	35067	1
36029	10	14345	0
37832	9	36313	1
6844	5	9025	0
37832	9	36939	1
4804	9	31631	0
19281	2	36184	1
20797	1	32107	0
19281	2	36901	1
6080	5	32132	0
37478	6	36143	1
36959	9	37528	0
37478	6	35100	1
1149	1	30714	0
32156	0	35858	1
33044	8	25488	0
7107	2	35900	1
34717	1	28010	0
19496	0	35813	1
911	8	26994	0
19496	2	34808	1
8759	2	19919	0
6872	0	36388	1
23369	7	1156	0
29293	4	34675	1
12218	10	16017	0
7712	0	35556	1
8563	4	23145	0
34376	2	35905	1
33950	9	34496	0
3033	8	35440	1
35374	8	34502	0
7512	0	34607	1
34717	0	17327	0
6615	0	35595	1
34332	1	19971	0
35487	5	35711	1
96	0	1695	0
35487	5	36879	1
16559	4	22416	0
31977	0	34664	1
30058	0	33229	0
31977	3	34941	1
26976	8	31796	0
17701	2	37673	1
26483	6	30910	0
1648	8	35375	1
35276	4	34757	0
1648	4	34801	1
127	9	3730	0
16002	0	36550	1
32748	4	28763	0
16002	2	35557	1
9971	6	36305	0
16002	2	35266	1
34417	10	35532	0
30242	4	34446	1
34285	7	1460	0
30242	9	37241	1
13468	10	34083	0
21042	2	36170	1
469	10	4225	0
31610	5	35506	1
8324	6	35470	0
31610	5	37782	1
1479	4	17364	0
29980	0	35472	1
8123	4	4576	0
35182	1	35391	1
13407	7	34577	0
18478	2	34969	1
11340	5	2409	0
36903	2	36009	1
28287	7	34332	0
14012	3	36817	1
3294	5	37659	0
9778	0	35259	1
37072	5	8453	0
37489	2	37590	1
3985	7	37192	0
37473	2	36247	1
13358	7	36125	0
37473	2	35628	1
35564	9	35564	0
17143	6	35400	1
23473	9	37151	0
14102	0	34997	1
17350	3	24298	0
18565	8	34477	1
30713	2	35564	0
5735	4	34131	1
30910	9	35842	0
8168	0	36944	1
30075	4	6320	0
15628	8	36533	1
7250	9	22940	0
6361	9	37684	1
28266	1	17004	0
34246	6	36052	1
1786	3	16784	0
15045	3	34107	1
21570	8	25348	0
33358	0	36140	1
28016	8	35770	0
17336	6	34576	1
34802	1	1888	0
34660	2	36000	1
9712	10	18577	0
11114	3	34895	1
8694	6	26491	0
21258	0	35199	1
36887	1	4855	0
19659	3	37229	1
9418	3	24810	0
4899	0	37304	1
35041	5	8981	0
34035	2	34271	1
13699	2	1980	0
16815	0	36257	1
32132	2	35858	0
10667	0	36780	1
34106	7	35720	0
35318	4	37377	1
31603	1	17877	0
35318	5	35167	1
18690	9	34889	0
35318	5	34092	1
31025	7	12320	0
23968	1	35531	1
11531	4	4576	0
37866	0	34181	1
12210	2	37348	0
23533	0	36218	1
14667	1	27102	0
804	3	36881	1
24395	9	22787	0
26781	1	36650	1
21158	9	8583	0
1604	2	34084	1
33904	7	29717	0
23306	0	35916	1
4504	0	21722	0
2963	0	34069	1
26709	6	8186	0
15254	0	35354	1
32043	7	36929	0
32245	0	35240	1
33951	0	28132	0
32245	6	35379	1
2384	1	6560	0
22301	9	34301	1
23736	10	32139	0
22301	9	34995	1
23357	6	35272	0
24764	3	36433	1
27350	1	34831	0
15267	5	35308	1
34099	2	4323	0
36246	0	35945	1
35816	6	5378	0
25030	0	37168	1
3730	5	28873	0
17007	0	36865	1
28596	6	36804	0
36699	0	34601	1
28139	10	3743	0
36699	6	35783	1
8447	8	25174	0
36699	6	33933	1
20419	1	9644	0
10833	3	37402	1
35743	2	34954	0
21335	3	34608	1
23314	4	35858	0
20469	6	34664	1
34454	0	8694	0
30181	0	34223	1
33044	1	24863	0
34762	0	37021	1
34113	3	20369	0
13086	4	35958	1
35373	8	8172	0
16260	5	35782	1
21683	1	5928	0
31784	5	34235	1
1479	10	34149	0
16857	0	37203	1
10717	7	1281	0
35694	2	33934	1
2359	6	34076	0
8681	6	37224	1
25724	4	13584	0
37412	6	36431	1
36016	3	23349	0
5914	5	34510	1
31603	4	9392	0
13858	0	34516	1
24568	1	8839	0
35261	0	34905	1
96	6	17831	0
27018	0	34685	1
9781	6	9079	0
32182	0	36466	1
11531	10	34018	0
5293	4	35206	1
9712	10	35532	0
5293	4	34179	1
24298	0	28349	0
33126	0	35827	1
28287	4	34577	0
33126	3	34310	1
20545	0	10476	0
4499	6	37122	1
20876	0	8635	0
35278	6	35261	1
11137	0	12788	0
32812	0	34644	1
33845	8	36921	0
15693	0	36196	1
29823	8	36019	0
15693	2	34519	1
36321	6	30379	0
211	0	37441	1
25174	6	15694	0
211	2	36793	1
25724	4	23313	0
22571	2	34746	1
35195	3	37424	0
21563	2	37719	1
34454	6	13407	0
9817	0	36347	1
35374	3	22787	0
17809	0	35053	1
33878	2	13665	0
33374	0	35240	1
2737	10	11121	0
30775	3	34310	1
13358	6	32438	0
35909	3	36493	1
17364	6	28259	0
35909	2	34647	1
17375	4	32090	0
35909	2	36630	1
9819	0	14548	0
35909	2	35805	1
33983	7	17061	0
35909	2	36534	1
37136	3	25174	0
35909	2	37501	1
9606	5	14871	0
5361	0	36218	1
33845	8	34695	0
5361	6	35464	1
5715	1	15260	0
24620	2	35803	1
14973	3	15332	0
36302	3	35579	1
35134	0	13827	0
36302	6	35197	1
7352	10	29694	0
36302	6	35450	1
37273	7	20953	0
36302	6	37843	1
2111	9	883	0
20686	0	36239	1
14786	5	34285	0
9176	0	35218	1
7691	6	19076	0
10450	2	37385	1
25408	8	25440	0
19875	1	34117	1
14362	0	30595	0
24202	5	35934	1
19884	3	15260	0
7054	8	36667	1
24247	7	23790	0
36504	4	36504	1
8563	8	27929	0
19383	0	36809	1
3123	3	11121	0
19383	4	35995	1
9781	5	31242	0
34023	3	37661	1
37388	5	22940	0
14798	3	36531	1
35522	8	22619	0
36738	3	36499	1
34099	7	34999	0
3998	2	37615	1
28305	3	18577	0
33282	3	36885	1
34195	10	1149	0
37668	3	35874	1
15260	2	35868	0
37668	5	37668	1
28767	1	30422	0
9144	1	35391	1
36486	9	36617	0
21892	0	37132	1
14117	0	34728	0
6336	3	37648	1
35713	0	15332	0
6336	2	36811	1
13209	8	8981	0
6323	2	37536	1
32736	5	20223	0
24888	6	36258	1
18690	5	35868	0
24869	3	34674	1
10599	9	13150	0
4833	3	34381	1
35564	4	34195	0
4833	6	35845	1
1888	1	9353	0
8163	2	34781	1
19884	0	14058	0
8163	2	34532	1
17125	3	33110	0
17129	2	36877	1
12266	8	35541	0
17129	2	36386	1
901	1	7645	0
37839	2	36208	1
3758	3	37750	0
37839	2	37346	1
34771	3	18425	0
23323	0	34667	1
20653	0	31631	0
25050	2	35107	1
32997	3	36922	0
25050	2	35486	1
32873	3	30058	0
26066	4	35721	1
14058	4	4325	0
3184	4	35475	1
17350	5	595	0
32402	3	34435	1
18690	0	23930	0
10864	2	36384	1
6103	8	21940	0
36143	5	35687	1
17893	7	13358	0
37015	6	36149	1
28767	1	30422	0
37117	8	34522	1
11625	9	2673	0
37117	5	36356	1
8727	2	16484	0
24850	0	35998	1
32722	6	20349	0
24850	1	37399	1
37388	3	37388	0
29818	0	34137	1
7288	4	28050	0
10300	3	36587	1
30994	7	30994	0
34823	2	35629	1
28010	10	9907	0
30970	2	35324	1
35743	6	11340	0
36438	0	34308	1
168	5	14058	0
23276	0	35234	1
10717	4	29598	0
29800	0	37203	1
10717	2	19767	0
27308	0	37269	1
12408	6	20980	0
27308	2	34124	1
17593	5	2944	0
37219	0	35404	1
26344	4	1786	0
9812	3	36817	1
17408	7	9781	0
6321	0	35958	1
34106	0	21891	0
25797	0	34035	1
29343	5	37657	0
3440	0	37775	1
23177	1	15886	0
5386	2	37334	1
21197	6	8123	0
36084	2	36665	1
19098	2	21115	0
31657	3	34622	1
11433	5	6111	0
19190	2	36451	1
28767	5	911	0
34345	2	37341	1
36122	8	37604	0
34345	2	34342	1
12519	1	7895	0
34345	2	37292	1
29045	10	17311	0
34345	2	36805	1
15786	3	34099	0
34345	2	35701	1
4213	8	32259	0
34345	2	36700	1
6847	4	35062	0
34345	2	35150	1
20773	1	32422	0
34345	2	34593	1
36305	0	35706	0
34345	2	35352	1
8172	2	5339	0
36092	1	36639	1
14106	6	21309	0
4065	0	35975	1
35497	0	23936	0
15645	5	37506	1
1695	7	13584	0
26656	0	37168	1
15332	1	25348	0
20756	0	34067	1
13851	5	5715	0
23476	5	34679	1
25724	8	36887	0
37707	0	35199	1
29343	4	9131	0
37707	3	35576	1
23693	5	15200	0
35933	3	36025	1
15177	0	7445	0
35933	2	37278	1
37585	5	14992	0
25805	3	37329	1
28596	9	19971	0
37456	2	35786	1
31819	7	37686	0
8195	4	37096	1
13699	2	12218	0
23764	0	36671	1
18828	0	34785	0
34506	2	36979	1
2465	8	12169	0
4531	0	36903	1
21115	0	21636	0
37174	4	34874	1
6560	9	20064	0
37174	2	36669	1
36486	0	10938	0
22386	8	36051	1
20797	7	19360	0
35824	5	36449	1
17488	10	18828	0
35824	5	35510	1
36929	7	5535	0
24575	4	35361	1
12293	7	9606	0
20073	0	35935	1
9451	8	14158	0
20921	3	34107	1
33584	0	26709	0
20921	6	34210	1
19360	1	23590	0
2164	0	37847	1
22559	10	26171	0
2164	2	37416	1
12320	4	9591	0
2164	2	35733	1
34831	7	8782	0
36937	6	35138	1
30410	4	37820	0
36937	6	35624	1
9366	8	26173	0
36937	6	34307	1
11340	0	23590	0
29242	0	37720	1
26176	5	18635	0
36264	3	34734	1
25545	2	21935	0
36264	2	34128	1
13350	10	3838	0
4493	4	34367	1
32748	9	31962	0
29965	6	36996	1
35522	10	34100	0
12206	2	34641	1
3311	9	3978	0
12206	2	34245	1
15786	5	24488	0
10130	2	36460	1
17873	8	31160	0
11666	3	36166	1
1695	2	34999	0
11666	6	35948	1
25209	10	15224	0
34878	0	37612	1
19098	4	32736	0
34878	3	35248	1
31066	7	2359	0
33045	0	36750	1
19098	2	19098	0
35293	8	37345	1
36120	0	21211	0
35293	8	37852	1
21903	3	21850	0
15247	0	37485	1
14345	8	6979	0
15247	2	37592	1
22869	10	11378	0
5055	3	34021	1
35187	4	2673	0
34374	9	34779	1
14786	6	21570	0
34374	9	35209	1
7288	6	21431	0
34374	9	34615	1
23313	9	37301	0
34374	9	34872	1
25856	7	20773	0
34374	9	35081	1
37820	3	8018	0
34374	9	34433	1
21903	5	9907	0
34374	9	34198	1
8839	4	22796	0
34374	9	35481	1
16764	0	25546	0
34374	9	34582	1
11566	7	24568	0
34374	9	35149	1
1438	9	34159	0
34374	9	35719	1
17738	5	30379	0
34374	9	34141	1
31276	8	36013	0
34374	9	34778	1
34058	3	22249	0
34374	9	35754	1
7973	9	32122	0
34374	9	37339	1
20653	2	15913	0
34374	9	37528	1
17311	8	19574	0
34374	9	33975	1
1980	8	13699	0
34374	9	33884	1
18604	8	21570	0
34374	9	36266	1
32843	5	3969	0
34374	9	37865	1
22602	8	10946	0
34374	9	34529	1
16509	5	33160	0
34374	9	35564	1
3311	9	37136	0
34374	9	36372	1
9975	5	37115	0
34374	9	36528	1
32928	5	11405	0
34374	9	35343	1
9366	1	28258	0
34374	9	36142	1
33878	5	34100	0
34374	9	37301	1
35446	3	31160	0
34374	9	35424	1
17738	5	1396	0
11716	0	35363	1
26261	3	33904	0
15725	5	36516	1
8972	10	11274	0
15725	5	35832	1
10717	4	24282	0
10130	2	35437	1
32601	3	16334	0
16785	0	36660	1
35518	4	96	0
4784	0	36766	1
25027	3	20331	0
4784	4	36712	1
34159	9	11891	0
37091	0	34751	1
17286	4	24810	0
19395	0	36906	1
34771	0	35648	0
34392	2	36566	1
37136	3	28349	0
20397	0	36497	1
15887	8	15887	0
16687	3	37503	1
17061	10	11123	0
34744	6	37791	1
11850	5	15887	0
25343	0	37469	1
22940	9	25693	0
34600	0	37728	1
34285	2	1479	0
7143	4	36145	1
5560	7	27796	0
7143	2	35052	1
31514	7	22559	0
36597	8	37586	1
23930	1	18690	0
36597	4	36636	1
36870	10	24298	0
16527	0	34668	1
34096	7	13973	0
16527	6	34275	1
34577	1	24819	0
7010	0	36977	1
23736	0	24863	0
25287	0	37348	1
34126	3	9663	0
19357	2	36395	1
35062	8	4504	0
25450	0	35036	1
469	2	34083	0
25450	3	36063	1
4028	6	9715	0
24579	2	35653	1
36003	3	25707	0
24579	2	34690	1
28132	5	14752	0
16095	2	36575	1
14313	10	21683	0
16095	2	36464	1
33458	4	6645	0
24428	1	35715	1
7635	3	26176	0
15499	3	34010	1
36045	5	13806	0
10505	0	37691	1
24831	3	37072	0
10505	3	36946	1
9006	4	24118	0
37669	0	34114	1
37657	10	36701	0
32379	0	36693	1
23590	4	21637	0
32379	3	35226	1
14201	2	3743	0
16402	4	36336	1
7495	7	28773	0
14466	0	36218	1
3761	9	12457	0
14466	6	37510	1
26625	0	6198	0
8689	8	34794	1
8091	6	12408	0
30113	0	35698	1
31242	7	26970	0
34187	5	37475	1
28706	9	22120	0
12856	4	35071	1
37150	6	622	0
7561	4	37449	1
32312	0	35743	0
18726	0	35168	1
23968	8	3838	0
18726	2	34888	1
11194	3	15246	0
18726	2	35615	1
27350	3	4855	0
18726	2	37664	1
26994	1	8344	0
35143	10	34698	1
3468	0	13513	0
35143	5	33971	1
25174	3	23590	0
28028	0	35976	1
27102	2	32220	0
14523	0	34429	1
17408	1	6125	0
23962	3	34728	1
28259	6	10258	0
13285	0	36454	1
36486	8	2737	0
13285	2	35111	1
1786	9	938	0
13285	2	35070	1
33950	0	11850	0
13285	2	34056	1
6459	1	29247	0
26816	3	35950	1
35788	8	26994	0
26816	6	35383	1
6080	2	6601	0
25454	3	35272	1
14582	7	29343	0
8382	1	35029	1
27350	10	34999	0
25392	0	37470	1
25505	5	35713	0
37337	0	36130	1
34417	4	34105	0
37337	3	35579	1
32090	9	9353	0
37337	6	34288	1
17961	0	23357	0
37337	6	36973	1
35842	10	36125	0
37337	6	35776	1
36013	8	36745	0
37337	6	37579	1
20156	7	8981	0
37337	6	35210	1
24999	6	33764	0
26163	5	35692	1
36771	7	34106	0
23653	6	34151	1
24298	0	20265	0
8367	0	34184	1
19517	4	16470	0
21536	6	36761	1
35290	4	34290	0
37208	3	34944	1
28763	5	16261	0
2755	3	34309	1
36870	1	1460	0
1807	2	37248	1
28596	4	16334	0
15586	3	35807	1
11891	6	469	0
6905	0	36017	1
25413	10	35743	0
6597	2	35601	1
9764	2	11123	0
31639	6	35488	1
34285	0	26171	0
21976	0	35439	1
2333	8	27350	0
11764	0	37168	1
4028	3	15992	0
24742	5	37718	1
22266	3	12266	0
30248	2	34959	1
13665	7	37577	0
37572	2	36094	1
18635	6	35571	0
37572	2	34157	1
26261	6	30595	0
37572	2	36088	1
15198	6	9800	0
37572	2	35285	1
37580	4	8563	0
37572	2	37069	1
10938	4	35446	0
36407	8	34197	1
32722	10	26970	0
36407	5	35065	1
6690	9	34493	0
[truncated: 2,620 more rows]
