# Supplementary material
Source: ML conference proceedings conference paper supplement (https://proceedings.neurips.cc/paper_files/paper/2021/hash/0fd600c953cde8121262e322ef09f70e-Abstract.html)
Supplement: Supplementary file 1 [file 0fd600c953cde8121262e322ef09f70e-Supplemental.zip › Supplementary_Material_Paper_8745/data/Hamaguchi-BM_tail-5000/train/train.txt]

25428	0	11287
23775	0	8797
23775	2	32944
4099	0	17118
4099	2	24458
27290	3	5105
30330	0	11600
6123	0	14765
6123	2	15517
12712	0	5799
33450	0	15159
29229	2	16026
29229	2	33022
29229	2	26870
29229	2	17993
29229	2	5142
10608	3	13387
29082	0	13001
29082	2	5689
29082	2	19599
29082	2	15732
29082	2	30736
5843	0	1331
5843	3	16509
17162	3	26071
1532	7	31470
6155	4	2448
3179	0	24318
3179	2	5635
3179	2	2415
3179	2	10990
3179	2	16271
3179	2	15344
3179	2	13385
3179	5	14903
3179	2	32508
3179	2	22195
3179	2	1932
3179	2	797
23109	0	234
23109	2	22640
9774	4	31857
9774	5	13574
11343	0	4781
11343	2	30187
753	3	24735
32964	4	22490
21503	0	19652
21503	3	8807
22896	3	6003
30984	0	27194
30984	3	30326
15617	6	27896
9800	3	33024
9800	6	20604
10558	0	18973
10558	2	11569
27283	3	2697
27283	6	29442
30017	0	850
30017	2	25904
28542	0	13517
576	3	17119
576	6	22665
576	6	12147
5974	0	32662
30568	0	2434
11483	8	13875
11483	4	28784
23428	5	25890
3910	0	3974
3910	2	21033
15513	0	3461
15513	2	2092
3145	2	30808
3145	2	20400
3145	2	25231
3145	2	16929
3145	2	1864
3145	2	10590
3145	2	16899
3145	2	26529
3145	2	21763
3145	2	5422
3145	2	15157
3145	2	433
3145	2	6102
3145	2	3901
3145	2	14193
3145	2	23671
3145	2	10638
26324	0	4844
26324	3	22294
16237	0	30613
16237	3	21256
16237	6	14018
16237	6	28373
1465	7	12010
13796	0	13766
13796	3	4233
1218	6	24967
29823	0	2388
20239	2	26347
29713	0	17438
29713	3	11479
3843	2	20603
3843	2	13131
3843	2	2587
6819	2	675
10266	3	30727
29706	2	5975
29706	2	22127
29706	2	29767
26908	0	4837
26908	2	12490
26908	2	32955
26908	2	22462
26908	2	1025
2842	0	8336
7965	6	23178
29257	5	18761
3543	0	22759
24401	6	32052
24401	6	18174
24401	6	30161
25064	0	9094
25064	1	23755
10013	3	11036
12788	3	26429
2296	1	31390
22275	8	2134
22275	4	5678
21497	3	25847
21497	2	23316
21497	2	10725
7383	3	8556
24106	4	9091
25448	9	24763
25448	9	2558
25448	9	4758
25448	9	11134
25448	9	21136
25448	9	23223
25448	9	28216
21015	0	16807
11642	6	21298
27093	0	2379
3604	3	11732
13620	5	7831
13620	5	24423
7743	0	11180
7743	2	4506
9534	2	20322
3199	3	9061
3485	0	14744
3485	2	24452
3485	2	20985
995	5	23151
995	5	1581
995	5	9309
16655	0	19976
25648	0	317
25648	5	3432
25648	2	33220
5351	3	25752
22771	3	2598
28556	4	4761
28556	4	22117
28556	5	20157
14091	0	26035
14091	3	24862
31768	0	11834
31768	0	1391
7433	0	8640
29981	0	28251
8889	0	31447
8889	2	25602
8889	2	19133
8889	2	5493
2086	0	26143
14797	7	22357
14797	7	10857
27527	0	10018
27527	4	18789
27527	2	21194
27527	2	19645
27527	2	4407
27527	2	1282
20513	0	29691
20513	1	6060
24434	0	11670
12687	0	18879
12687	3	15762
12687	2	13613
12687	2	17998
23662	8	22395
888	2	2085
888	2	26119
28199	0	30307
28199	4	20248
17409	0	26416
17409	2	9585
17409	2	5196
17409	2	24942
17409	2	21475
29745	4	3236
1870	5	25896
1537	0	28344
1537	4	29565
19733	0	4808
33707	0	13101
33707	2	12246
33707	2	8244
33401	0	32899
33401	3	14102
32027	0	21018
14758	0	31673
14758	3	8018
11438	2	11019
2195	6	27783
4282	3	27669
32465	0	12786
32465	2	31060
33314	0	6638
33314	0	915
33314	2	6648
8553	0	23698
19162	4	16645
17481	2	21118
17481	2	23596
16004	6	2155
13974	3	23471
13974	6	9372
19656	3	3671
10228	3	9544
17767	2	27621
539	0	28378
24718	6	32345
24718	9	13592
30317	3	15918
32120	0	19991
32120	1	10545
1551	3	6497
9956	2	28472
9956	2	7624
9956	2	30295
9956	2	25213
9956	2	2426
9956	2	15150
9956	5	31189
9956	5	31365
9956	2	8913
11264	0	32031
11264	2	19373
21849	0	5738
19409	2	19756
19409	2	422
19409	2	18113
19409	2	7596
19409	2	15566
19409	2	7881
19409	2	2913
19409	2	27597
19409	2	27825
19409	2	27549
24019	0	2254
24019	3	3701
30219	0	32152
14640	0	21309
15561	0	1486
15561	2	31932
15561	2	3727
32883	3	24749
32883	6	31678
24185	5	12228
25108	2	4471
3338	2	3832
33132	2	21046
17201	0	15623
17201	5	18838
31166	6	14203
16912	0	10091
33485	0	20843
33485	2	10097
13695	0	1456
109	6	30681
24776	0	25113
24776	3	16578
26538	8	14140
26538	4	21843
2356	2	13712
2356	2	26689
21260	7	1095
19038	0	2764
9885	1	10740
28727	0	31516
28727	2	5433
28589	4	27559
28589	4	22439
28589	2	28900
28589	2	12022
28589	2	32375
28589	2	9334
28589	2	24080
28589	2	10933
6983	2	31810
26329	0	23531
26329	2	23567
32855	0	26088
32855	4	18320
14933	0	28710
14937	7	8788
14937	1	10676
33467	0	7133
20248	0	30307
20248	4	31857
20248	5	2050
20248	5	26697
20248	5	10576
20248	5	28199
20248	5	28857
20248	5	494
20248	5	30575
14755	0	5908
14755	2	29424
17269	0	24119
17269	4	25026
17269	2	2279
1800	4	9831
5882	2	11665
20151	0	27781
8081	8	13397
8081	1	18729
33708	6	21395
33708	6	16964
33708	6	31521
18329	0	28672
18329	3	30988
26870	8	29229
26870	8	28483
28197	6	16659
29715	0	14534
16021	2	3875
33811	8	12537
9922	4	19647
9922	5	15321
21559	0	2118
21559	5	12366
11159	0	6891
11159	2	23335
11159	2	26020
15507	0	20252
15507	4	25850
23427	2	6098
29477	9	23579
29477	9	24746
29477	9	17611
29477	9	13955
29477	9	9265
29477	9	17945
29477	9	12776
29477	9	31294
29477	9	22253
29477	9	8115
29477	9	17107
29477	9	26303
29477	9	24452
29477	9	24146
29477	9	32800
29477	9	27025
29477	9	32841
29477	9	26706
29477	9	30630
29477	9	30636
29477	9	20166
29477	9	2521
29477	9	20845
29477	9	30812
29477	9	33383
29477	9	12470
29477	9	20537
29477	9	26365
29477	9	6259
29477	9	21789
29477	9	14737
29477	9	20805
29477	9	14838
29477	9	21017
29477	9	28509
29477	9	3068
29477	9	1979
29477	2	20179
29477	9	29361
29477	9	30978
29477	9	840
29477	9	4094
29477	9	8493
29477	9	15881
29477	9	13217
29477	9	24596
29477	9	17451
29477	9	25242
29477	9	16320
29477	9	29204
29477	9	9107
29477	9	32860
29477	9	23301
29477	9	22957
29477	9	6332
29477	9	12021
29477	9	30658
29477	9	22783
29477	9	9096
29477	9	13905
29477	9	10937
29477	9	21138
29477	9	32521
33507	0	612
6142	0	21439
4996	0	3589
23688	3	28321
13732	2	17342
13732	2	26432
8644	0	33256
8644	5	11320
8644	2	20043
8644	2	25373
8644	2	17050
8644	2	14139
8644	2	27522
8644	2	11880
8644	2	1467
8644	2	7567
8644	2	8924
7797	0	15110
17688	0	1771
33211	3	21548
33211	2	24457
7691	6	21735
7691	6	30222
7691	6	27659
7691	6	17895
7691	6	368
7691	6	696
7691	6	3128
7691	6	33056
7691	6	16600
7691	6	11377
7691	6	32956
7691	6	9306
27246	0	4538
27246	0	21822
27246	2	17454
27246	2	26521
28260	3	23061
27454	0	13688
15720	0	2434
15720	2	27800
6447	4	21176
6447	4	22983
31141	0	8044
31141	2	17286
21672	4	20321
15223	0	17309
15223	4	30130
3146	0	12880
3146	2	14300
2999	0	2641
15888	2	26062
21474	1	2013
2125	6	31817
29857	2	25496
29857	2	1991
20726	0	8273
10516	6	18390
10516	6	4801
10516	6	28541
4284	0	22901
4284	1	19600
21666	8	30417
21666	8	12537
7492	0	15594
7492	2	23196
16167	6	33699
16167	6	19486
8230	0	25374
8230	2	12321
12533	6	25132
21192	0	22922
25117	0	21308
16284	0	2217
11136	2	23651
11136	2	14677
11136	2	8082
16742	3	5446
30588	7	10857
20236	2	4260
20236	2	14043
20236	2	6589
20236	2	21690
14423	6	19423
3813	2	12000
18602	6	15442
11507	5	33207
7518	1	24750
7488	0	19054
7488	4	3099
16621	0	739
16621	3	9990
2833	0	24773
10248	2	14936
23643	0	4541
23643	2	7812
31173	0	14675
31173	2	14139
31173	2	25713
28262	3	31993
28262	6	14016
28262	6	26467
28262	6	7523
28262	6	19901
28262	6	3507
28262	6	12396
14379	2	8925
17436	0	11866
17436	3	32209
1157	0	24263
33080	3	3601
33119	0	8582
33119	3	11290
33119	6	15257
2679	0	24722
3609	4	18445
3609	3	19112
18236	2	4228
18236	2	14239
18236	2	4565
18236	2	31563
33002	2	29160
33002	2	27924
33002	2	18406
18891	0	15954
29063	0	4527
25354	8	24299
5267	0	15709
5267	3	13360
10906	2	17551
31319	0	2365
31319	2	5932
28936	0	3335
26853	0	19545
26853	3	15989
9719	3	12840
9719	6	18581
8782	0	17424
8782	6	25848
8782	6	7313
8782	6	9106
8782	6	23759
32081	0	32991
14655	0	20376
14655	2	7450
14655	2	24683
14655	2	18422
14655	2	20909
22574	0	5738
5421	0	19265
5421	2	20871
5421	2	33316
18900	0	10481
18900	3	4400
33605	0	6509
5982	0	2277
5982	2	18748
5982	2	29018
21271	8	8079
1864	0	3145
9057	0	9777
23288	2	28223
6639	0	33812
12724	0	26906
21078	3	5567
21078	6	9659
24871	0	30479
28534	2	28206
28534	2	18719
3310	8	13875
3310	4	20333
32312	0	3905
33571	2	10658
9283	0	19938
17276	0	26487
26755	2	11996
26755	2	26391
13982	3	4314
8154	3	17033
25292	0	239
25292	2	30755
2895	2	13304
30139	6	12167
16019	0	32207
16019	6	14783
16019	6	13860
2678	3	8036
12665	2	15034
787	0	30307
787	4	16169
787	5	5957
787	5	32713
787	5	16761
787	5	31448
787	5	20287
787	5	10315
22051	0	25587
22051	2	21856
22051	2	6475
7700	0	1012
1286	0	29719
1286	3	30182
5421	2	31467
1404	0	32701
1404	3	24604
8856	4	787
17951	3	19725
22648	0	1
22648	3	19066
29568	0	4328
30789	0	28003
26255	0	30613
26255	3	21256
26255	6	1107
6835	4	30858
450	0	8319
88	3	12184
88	6	2518
26391	0	31786
31324	3	4769
31324	6	13309
27995	0	12919
27995	4	18502
27995	2	20908
27995	6	26459
1682	3	10020
25875	2	5703
25875	2	20525
20539	0	27474
20539	3	24440
1730	0	671
25357	3	15345
7865	0	8159
7865	2	23284
7865	2	6502
16989	2	16740
27690	7	11428
30476	0	8253
30476	6	10725
6133	3	4683
4191	0	33267
7653	8	14762
7653	4	1150
3467	0	9999
3467	3	20118
4066	0	7511
4066	2	26318
18772	0	33480
18772	3	9587
20936	3	19698
1073	0	32852
1073	5	27698
14571	0	33315
6867	0	13001
6867	3	17881
6867	2	26086
6867	2	11689
3729	2	4811
31986	4	27411
2244	3	31893
17279	6	12750
8603	8	30692
7270	6	5801
6369	8	12537
14527	0	24955
14527	3	11985
724	7	26422
21684	0	23583
21684	9	33248
21684	5	32595
21684	5	23782
21684	5	16013
21684	2	3099
21684	5	3608
21684	5	12895
21684	5	29378
21684	5	30932
21684	2	23501
21684	5	30715
21684	5	7143
21684	2	31284
21684	5	8293
21684	5	19054
21684	5	6140
21684	5	25614
21684	5	16735
21684	5	33678
21684	2	16840
21684	5	26646
21684	9	2100
21684	9	23823
2567	2	4109
20876	4	20876
28978	4	25845
25680	0	26487
11297	0	2548
31793	0	25193
1761	2	32983
1761	2	5964
1761	2	20559
31061	3	1406
13048	6	24014
31576	0	10100
31483	0	15109
31483	2	9222
9594	2	18440
14432	8	10870
14432	0	19723
14432	6	13002
5829	2	8985
2864	6	30857
2267	0	30970
2267	3	10938
29967	2	8883
29967	2	13191
29967	2	5709
29967	2	11735
33634	8	18338
33634	5	6047
33634	5	2609
33634	5	21741
33634	5	11661
33634	5	23045
33634	5	29723
33634	5	27282
33634	5	1268
33634	5	24547
26369	0	25790
970	5	5297
6499	0	27270
14956	0	8843
14956	2	28346
12953	0	28825
6894	0	19856
6894	2	30802
13430	0	16928
13430	3	33320
13656	3	13310
27856	1	16593
208	0	28167
21381	0	31673
24125	0	18354
24125	2	31231
24125	2	20023
24125	2	1090
24125	2	8767
24125	2	1342
24125	2	30440
4906	4	4827
16873	0	11639
16873	4	32961
31475	0	31673
9489	0	24579
23369	0	32486
19877	0	26964
11168	0	26650
27366	5	32904
27366	5	7878
27366	6	5250
21425	6	7222
21425	6	15282
21425	6	18852
21425	6	19339
21425	6	29549
21425	6	8735
16509	6	27142
16509	6	5843
16509	6	23626
28482	2	24573
13946	3	4349
25427	7	1083
22003	8	12713
15318	8	12693
24257	6	33755
24257	6	12849
1826	2	25684
1826	2	9588
22666	0	16886
13506	5	28814
13581	8	13382
10051	3	622
17315	0	28605
17315	2	17546
17315	2	2584
17315	2	13474
22995	0	7703
22995	2	7364
32371	0	5083
32371	2	29630
32371	2	20197
24043	0	24854
33472	7	32659
20655	6	23000
20323	0	5065
20323	2	27203
24540	0	3888
24540	2	20832
15468	0	7417
15468	2	14859
28017	0	17764
28017	5	21853
823	0	17144
823	3	6720
700	0	22747
33481	7	5012
21982	4	31349
7002	5	19535
2496	2	5174
26138	4	33700
4705	8	758
4705	3	4098
28006	3	18856
9952	0	6104
9952	2	15839
23942	2	1363
9628	0	17996
9628	1	25810
27021	0	23103
27021	2	28902
27021	2	32430
27021	2	16689
27021	2	8683
27021	2	13779
27021	2	20241
27021	2	8765
27021	2	14940
20251	0	14468
32994	2	16628
32994	2	15842
32994	5	315
32741	8	22023
32741	1	16593
17816	0	20774
17816	3	5026
4926	2	10071
3919	0	13882
3919	3	24183
32913	0	14358
32913	3	15360
17141	1	7930
21816	0	30350
21816	2	30865
21816	2	26841
24531	0	25831
24531	5	30619
27650	2	24550
12343	0	24530
2324	0	33595
2324	4	29079
2324	4	3025
2324	4	7749
2324	2	30607
7065	4	10719
7065	10	12131
7065	10	6721
7065	10	26619
7065	10	30838
7065	5	18778
7065	5	3857
7065	5	14532
7065	6	7453
7065	10	20493
27327	0	17558
2886	7	33662
13750	0	6550
2519	0	24346
3796	10	28993
3796	5	19192
3796	6	617
12358	0	9711
18855	6	537
841	2	16174
841	2	28168
7649	0	8159
7649	9	18787
15689	0	16705
15689	1	4179
11850	0	3997
11850	2	30036
7094	0	25842
7094	4	5914
26683	0	13446
26683	2	15994
25686	3	11239
7777	0	739
7777	3	17987
31040	0	2197
31040	2	31910
31040	2	1803
30705	2	17826
30705	2	10239
30705	2	12605
30705	2	2322
30705	2	3125
30705	2	30385
30705	2	28166
30705	2	29440
30705	2	15493
30705	2	20979
30705	2	32650
30705	2	7377
22197	5	22197
18741	0	32566
26015	0	6502
5525	0	8825
5525	2	12494
5939	0	21021
5939	4	13913
9997	4	26997
8854	0	18422
23055	0	25304
23055	5	23055
13325	2	3582
13325	2	10114
2204	2	16859
2204	2	21200
597	0	17047
23418	0	7643
22084	0	17458
32137	0	18726
32137	6	8211
12693	2	22336
12693	2	26053
12693	2	23924
12693	2	15041
12693	2	436
12693	2	7361
12693	2	24299
12693	2	9586
12693	2	15142
12693	2	30331
12693	2	12758
12693	2	12286
12693	2	15318
12693	2	9564
12693	2	28117
12693	2	28116
12693	2	1541
12693	2	16973
3530	3	29238
3530	6	19521
15303	0	19596
15303	2	12457
20870	0	4786
8341	4	16645
18740	0	1553
23483	0	33123
23136	0	25603
23136	1	5688
10414	3	7804
30348	3	16122
30348	6	30599
30348	6	20798
9112	0	14767
24163	0	8579
24163	2	3394
24163	2	28732
24163	2	6024
22552	4	1437
26386	7	15599
26283	6	8991
19892	0	31161
14778	0	4371
14778	3	28627
23138	0	26265
23138	2	4492
24027	2	15811
24027	2	2651
24027	2	594
3134	0	10953
3134	2	28453
19732	0	24484
13377	8	27791
13377	4	14231
1186	2	25031
1186	2	15000
1186	2	29254
1186	2	14703
30846	0	29316
159	6	27883
4776	0	33109
16089	0	3999
7422	0	14719
15868	0	5207
15868	1	1280
6173	3	17560
6173	6	10023
6173	6	8385
6173	6	21521
13351	3	5058
13351	6	33077
30303	2	25386
30303	2	14127
4985	0	16279
4985	3	4183
4985	5	19603
2405	0	33518
2405	3	5100
16285	0	23279
27785	8	2040
27785	8	2039
32566	2	29565
32566	2	17929
32566	2	18741
32566	2	25733
28911	0	25840
28911	3	24527
31520	0	17959
21359	0	18811
31376	0	23988
31376	2	18797
30285	0	19908
4432	2	8482
4432	2	30825
5155	1	8130
33320	6	16928
33320	6	7953
33320	6	15606
33320	6	2935
33320	6	11541
33320	6	22096
33320	6	18067
33320	6	15809
33320	6	17127
33320	6	21063
33320	6	13430
33320	6	7646
33320	6	23374
1450	0	31889
1450	2	29409
20142	6	834
23077	0	10864
23077	2	23001
33168	0	29239
33168	2	15144
5006	2	30943
5610	7	10596
1406	6	9446
1406	6	14216
1406	6	3746
1406	6	31061
1406	6	27662
1406	6	9166
2129	0	13197
2129	1	21418
2129	2	30140
30538	3	24291
30538	2	9730
30538	2	15633
30538	2	31594
3409	0	5141
20467	0	17424
20467	3	26246
4411	0	16096
33386	0	11740
33386	1	18922
3835	4	804
27541	0	21399
7207	3	20760
7207	6	11966
7207	6	22345
6040	0	32031
31070	3	22174
31070	2	28544
253	2	26284
17163	0	3517
17163	6	30660
13428	3	13959
13428	5	30751
22080	0	10164
31291	0	18037
31291	4	25583
21389	0	7222
21389	3	19339
17641	6	24679
17695	3	25873
8684	0	32965
29103	0	8121
29103	0	6642
17748	0	13398
4808	2	27766
4808	2	19733
7173	8	5905
7173	8	14691
7173	8	14590
26631	4	9194
26631	5	3217
1458	0	18901
1458	9	21244
1458	9	584
1458	9	19937
1458	9	4999
1458	5	31703
1458	9	26492
1458	9	33594
1458	9	10564
1458	9	22827
1458	9	18667
1458	9	30427
1458	9	29536
1458	9	1642
1458	9	18857
1458	9	3819
6843	6	13836
2107	0	25632
2107	3	26568
25447	2	1345
25447	2	2855
5023	3	30272
23032	4	20505
23032	5	29443
23032	5	15851
8520	0	8273
8520	4	27893
4084	0	8955
4084	3	7910
22748	3	12977
22748	6	8113
22748	6	6687
26830	8	13875
9114	0	20843
14715	3	17262
10731	2	14158
10731	2	10342
17911	0	27725
17911	5	31928
21471	0	10040
21471	3	28707
2147	0	6572
2147	3	4368
15273	3	28417
25966	3	18075
25966	2	10209
15299	2	28572
15299	2	3367
29415	6	5677
31889	2	1450
31889	2	8620
31889	2	33507
31889	2	14265
31889	2	15850
2523	3	2395
2523	5	3089
12568	0	23605
12568	3	22669
31510	7	16466
30015	6	21276
30015	6	24378
30015	6	24861
30015	6	3114
15550	4	22117
4633	3	33019
14340	2	26785
14340	2	22971
14340	2	7255
14340	2	23072
14340	2	24576
14340	2	25122
14340	2	22070
22327	0	8582
22327	6	28102
22327	6	33413
22327	6	15893
22327	6	31486
22327	6	15760
17275	0	17587
17275	2	20993
17275	2	19337
17275	2	727
18392	4	10333
7706	3	25243
31088	0	9899
31088	3	27307
28745	2	30512
29986	0	21530
29986	0	33569
1996	0	14901
1996	2	23395
1993	0	15539
1993	4	3099
1993	5	3395
29326	3	9817
14061	0	3437
14061	5	9993
3516	0	3393
32074	0	8998
32074	5	1163
18988	3	22274
14320	0	8869
14320	2	33034
14320	2	1014
8272	0	114
8272	3	23417
9239	0	19395
15777	0	9014
30971	8	24896
1092	0	19049
23516	4	21287
15081	0	3904
15081	9	8284
15081	9	5101
15081	9	1968
15081	9	32863
15081	9	24219
15081	9	28864
15081	9	19182
15081	9	24369
15081	9	28248
15081	9	30362
15081	9	7524
15081	9	8590
15081	9	31367
15081	9	12024
15081	9	15340
15081	9	25744
15081	9	12002
15081	9	24641
15081	9	4991
15081	9	29270
15081	9	15637
15081	9	20594
15081	9	20049
15081	9	11854
15081	9	5704
15081	9	12632
15081	9	27722
15081	2	29833
15081	2	18428
15081	2	27253
15081	2	26423
15081	2	29546
15081	9	18874
15081	9	29411
15081	9	14943
15081	9	31071
15081	9	27171
15081	9	19273
15081	9	32283
15081	9	3182
15081	9	33493
15081	9	29472
15081	9	21400
15081	9	23378
15081	9	32199
15081	9	22780
15081	9	5417
15081	9	5044
15081	9	5556
15081	9	1303
15081	9	3023
15081	9	13350
15081	9	29480
30982	3	15486
30982	6	20791
13877	8	28853
9437	3	5759
5387	3	28668
19770	2	32835
1473	0	10115
18156	0	6837
18156	4	10212
14164	0	12393
14164	3	24227
24886	0	22260
20461	0	7090
20461	2	23642
3836	4	17657
3836	4	31349
3836	4	27893
3836	5	5815
23207	0	31497
23207	3	202
8533	6	17069
8533	6	18257
1150	4	22818
1150	5	18661
1150	5	20995
1150	5	12850
1150	5	21834
1150	5	7653
1150	5	13693
32321	0	24789
32321	2	9030
30095	0	4082
30095	0	6
18079	0	31259
18079	2	32369
18079	2	28974
5932	0	31319
6497	6	1551
1354	2	6714
12777	0	15009
23463	0	2539
23463	3	31845
24541	5	17564
24541	2	25475
16487	2	6854
5720	0	3109
5720	2	11543
5720	2	23453
5720	2	32867
5720	2	13203
5720	2	11462
5720	2	8236
27456	0	10381
27456	3	11594
3868	0	2644
3868	5	3751
4377	0	11559
4377	9	24398
4377	2	23720
4377	9	5527
4377	9	12132
4377	9	14194
4377	9	500
4377	9	12615
13431	0	7695
24846	0	16446
28103	3	25658
7453	3	7065
7453	2	24317
4842	3	28520
11651	4	5914
20334	7	20415
17634	0	29747
17634	2	9192
28905	0	23450
28905	2	500
16494	0	11227
22064	0	31516
22064	2	25626
25903	3	20126
11007	2	26746
11007	2	8936
25850	5	30159
25850	5	15507
25850	5	30349
16307	8	16475
17989	0	33623
17989	2	31042
17989	2	7769
1259	3	16868
17366	0	10606
17366	4	13913
172	9	9917
172	2	18476
172	9	30933
172	9	32951
17354	8	19440
17354	4	27730
11248	0	29801
11248	2	30685
11248	2	7037
30629	0	30414
30629	2	16112
30629	2	17157
30629	2	28925
30629	5	3850
22849	5	21888
6704	3	9587
17280	0	11139
17280	2	26555
23406	3	12077
20724	0	29445
20724	0	24229
13107	2	16168
7775	3	15069
100	0	17132
100	1	2013
10055	3	7685
28255	0	22424
3272	0	39
3272	6	1196
3272	6	2092
15325	2	912
11614	0	19477
8791	0	28714
24423	0	12659
24423	4	13620
28777	2	11681
28777	2	5082
28777	2	33276
28777	2	16934
20248	4	10193
31257	0	13452
29692	0	13685
29692	2	28809
29692	2	20784
14201	6	18715
804	4	14810
804	10	529
804	10	10600
804	10	15206
804	10	3002
804	5	3835
804	5	9108
804	5	31685
804	5	27329
804	5	21211
804	5	21963
804	5	22538
804	5	27835
804	5	410
804	5	0
804	6	20894
14775	0	17023
13202	7	25069
13202	7	15915
9545	5	5365
9545	5	20750
9545	5	29842
9545	5	784
9545	5	29211
9545	5	23832
9545	5	26562
9545	5	9881
9545	5	16564
9545	5	14878
9545	5	24559
9545	5	7616
30658	1	29477
19163	2	24127
19163	2	19378
4454	2	26924
4454	2	963
30708	0	4364
30708	3	16159
14249	0	2138
14249	3	10068
33683	1	24750
30230	0	30137
30230	0	20202
23559	0	24552
23559	3	11883
14266	0	6837
19219	3	9450
13913	0	29584
13913	5	5939
13913	5	17366
29913	1	5148
18842	0	33763
18842	2	7018
15124	0	23422
15124	3	25147
19164	0	15129
19164	1	18088
19164	2	20812
19164	2	12704
19164	2	30346
30552	8	2677
30552	8	22425
17783	0	6658
17783	2	13201
17783	2	14476
17783	2	23188
12462	7	9258
12462	7	24758
29581	1	9284
29581	2	9023
29581	2	30435
6051	3	23039
29005	0	23758
30160	0	11032
26580	0	2138
26580	3	29574
14279	0	340
12954	0	10180
12954	3	29805
5379	0	14033
5379	3	24427
12027	0	10710
12027	3	28417
12027	5	3472
25880	0	22627
25880	5	5318
25880	5	28142
25880	5	29904
25880	5	25315
25880	2	26194
30255	0	32899
30255	3	32404
30255	5	28847
16771	1	28737
16771	2	12182
16771	2	7010
13422	3	18131
13422	2	11782
18752	8	12308
15579	0	20981
15579	4	12214
499	0	31797
499	2	25898
499	2	25939
20851	6	11978
20851	6	18577
29264	0	9222
29264	4	4359
31715	0	22471
31715	5	21892
16845	0	32358
16845	3	18728
17367	1	28540
15887	6	14529
30486	0	12159
31795	0	19768
31795	3	17081
30287	0	13600
18007	0	25279
18007	2	15931
761	0	391
761	2	31016
761	2	4426
761	2	6971
761	2	19112
3129	2	32878
3129	2	28593
3129	2	20148
6992	5	2104
6992	6	30668
19024	4	77
27224	0	562
27224	2	26555
10676	9	14937
10676	9	22821
10676	9	8696
10676	9	17849
10676	9	28687
10676	9	5276
10676	9	30131
10676	9	33631
10676	9	22489
10676	9	14331
10676	9	6498
10676	9	4540
10676	2	27478
10676	2	18059
10676	2	19232
10676	9	11640
10676	2	21826
10676	2	1293
10676	2	33228
10676	2	7502
10676	2	27058
10676	2	31570
10676	2	1159
10676	2	25235
10676	9	3689
10676	9	32516
10676	9	13478
10676	5	27152
10676	9	23552
10676	2	29292
10676	9	14448
10676	9	29434
10676	9	3979
10676	9	21157
10676	9	21687
10676	9	27442
17495	0	26554
17495	2	24865
10798	0	6484
10798	2	18660
10798	2	28176
31993	6	28262
9031	2	28713
13110	6	28663
32672	0	5583
3965	0	10149
3965	2	9664
21637	8	22395
21637	4	679
20679	0	8736
22675	8	31277
11212	0	8400
11212	1	10205
11212	2	22102
13152	2	20668
13152	2	23591
13152	2	14817
13152	2	24262
22931	0	18779
10388	0	19177
10388	3	29262
18754	0	20653
18754	1	16519
6300	3	26779
6300	6	2102
31401	4	7182
1698	0	2220
30695	3	15741
21897	6	28713
19965	0	10147
11422	0	2197
11422	5	17660
11422	2	9818
11422	2	26917
1557	2	12206
1557	2	13591
1557	2	31817
1557	2	25178
13679	0	736
31917	3	17197
28659	4	5557
24606	0	29270
24606	0	11783
17777	9	22751
17777	9	3602
17777	5	6163
17777	2	10676
17777	2	17175
17777	2	13614
17777	2	10466
17777	2	14988
17777	2	10631
17777	2	19692
17777	2	364
17777	2	2169
17777	5	23279
17777	9	30977
17777	9	18101
17777	9	31751
17777	2	26205
17777	2	21324
17777	2	14448
17777	2	21293
17777	9	28624
17777	9	13103
14813	7	33114
14813	7	25255
14813	7	30684
6282	0	8371
20338	0	33097
7909	0	25026
7909	2	8841
7909	2	12154
7909	2	33678
7909	2	12648
33300	4	29624
1577	2	16671
16993	2	16589
13676	0	31516
15371	0	1653
18598	3	20692
28274	0	20996
14674	3	13554
1762	6	16975
1762	6	9758
15516	0	28303
30115	2	3243
30115	2	7193
30115	2	17062
30115	2	17548
30115	2	11394
30115	2	4102
30115	2	11171
30115	2	6871
30115	2	527
30115	2	24697
30115	2	22229
30115	2	5982
30115	2	20201
33540	3	7664
33540	6	32770
33540	6	21980
33540	6	17010
19099	2	18400
28108	4	635
28108	2	6861
28108	2	15611
30478	0	26489
30478	1	6317
8040	0	12262
2178	0	13794
7242	8	11195
26394	4	4359
26394	3	26604
9659	0	5133
9659	3	21078
9659	2	2746
9659	2	12678
9659	2	12529
9659	2	31719
9659	2	28268
9659	2	31853
9659	2	33615
9659	2	1103
31232	5	27002
20667	0	26852
22634	0	19847
10421	0	26503
1008	0	31064
31201	6	3713
1061	3	202
3724	0	25279
10336	0	11866
10336	3	20682
19157	6	31990
22179	2	19586
22179	2	21797
22179	2	25819
11688	6	22336
2834	0	11299
2834	2	11460
29309	0	9649
21706	3	15294
21706	6	27593
16216	0	674
16216	2	15280
10305	8	11882
10317	0	33396
10317	0	8615
11931	8	13875
11931	4	13239
5407	0	33092
5407	1	25371
5407	2	28144
5407	2	6206
5407	2	30927
13843	2	32053
4527	0	19344
4527	2	32728
4527	2	29063
21266	0	6706
9989	0	11565
1424	0	3393
1424	2	26101
21442	0	1761
26271	5	25207
19396	6	19453
17000	3	19315
22206	0	4564
22206	1	28540
10052	0	21114
10052	2	28220
33306	2	3000
33306	2	14744
20748	0	17737
17701	2	12852
8186	8	22264
24771	6	17325
28871	0	31079
28871	2	13199
23964	0	2808
25904	0	30017
5784	0	14618
15655	0	730
2121	8	14762
2121	4	32410
31386	8	12308
2571	0	10180
26713	0	33013
29059	2	25052
27074	0	29698
27074	3	13455
12329	2	30863
33678	0	7909
33678	4	21684
33678	5	8369
8500	7	21855
4438	4	5494
3116	0	1237
28504	0	27474
28504	3	24440
28723	0	27194
28723	3	30326
16420	0	8527
33238	0	6667
29390	4	13001
29390	4	5688
29390	2	33738
5661	0	27474
5661	3	24440
11652	0	28406
2217	2	23548
2217	2	14516
2217	2	32598
2217	2	24454
2217	2	16284
2217	2	16180
19174	3	15683
8874	0	23971
2489	0	15147
20588	0	20417
20588	2	4615
20588	2	14026
20588	5	15086
2685	8	2677
29901	0	33130
16096	0	22784
16477	6	21369
3039	0	25399
8184	0	32639
27656	0	23733
27656	2	3666
867	3	21193
28949	6	31885
30182	6	1286
30201	8	19913
30201	4	30021
30201	5	15869
30201	5	31836
30201	5	28999
25768	0	16606
25768	2	20504
31822	3	15627
21345	3	20154
21345	6	18336
6016	0	32125
118	0	5156
118	2	6266
25063	0	6536
25063	2	3691
25063	2	13388
25063	2	22281
25063	2	10910
25063	2	32292
32368	3	2137
1948	2	26203
2404	2	6828
2404	2	1167
2404	2	30794
25958	2	25270
25958	2	2578
1368	2	30985
1368	2	11219
1368	2	541
1368	5	7343
19521	0	2138
19521	3	3530
17406	0	14523
17406	4	25740
22463	0	21506
22463	5	3953
32525	3	14679
239	0	628
239	2	25292
239	2	22830
239	2	22562
29226	0	23391
29226	5	2399
18072	0	2138
18072	3	5890
23679	0	11912
31735	0	619
27539	3	2357
27539	6	23310
28404	0	25851
21583	3	5374
21583	6	222
3004	0	31465
3004	2	29480
23118	0	9593
23118	3	23275
8920	6	12934
6436	0	20839
6436	1	20880
10951	2	3433
24164	0	33355
904	3	19934
21287	4	7463
21287	5	6739
21287	5	23982
21287	5	24864
21287	5	20061
21287	5	20927
21287	5	20480
21287	5	2310
21287	5	23516
21287	5	17925
21287	5	25746
32215	2	25510
32215	2	16242
32215	2	21336
2475	7	9424
25550	0	26279
31732	2	10134
31732	2	21530
31732	2	12381
31732	2	6693
31732	2	8897
872	0	3999
3126	0	6076
12436	0	26632
26101	0	1424
26101	4	7130
25574	0	25483
20247	0	19224
20247	2	27029
11679	3	10579
11679	6	16462
11679	6	1493
11679	6	19704
11679	6	4916
11679	6	18275
11679	6	16546
558	0	20294
12708	3	2520
32276	1	17534
18515	0	23703
18515	3	6595
915	0	1631
915	2	33314
30603	8	2134
30603	4	3033
3282	0	8017
3282	5	14538
25891	1	26108
6667	2	11848
6667	2	13527
6667	2	33550
6667	2	20491
6667	2	27356
6667	2	33238
6667	2	24220
6667	2	3063
6667	2	19621
6667	2	31178
6667	2	8268
6667	2	1923
17020	0	31994
17020	2	16297
17020	2	12465
17020	9	25420
17020	9	27861
17020	9	16205
17020	9	12804
17020	9	16396
17020	9	26207
17020	9	29080
1577	2	10447
1577	2	25694
1577	2	6367
1577	2	25076
33180	2	28787
33180	2	33177
33180	2	17588
33180	2	17544
33180	2	23847
33180	2	20864
33180	2	6918
3579	0	23725
11411	1	30701
11411	2	29255
11411	2	15971
11411	2	26153
11411	2	17401
11411	2	3519
11411	2	8645
23394	0	1752
23394	0	13859
23394	2	19326
16405	0	8851
16405	3	16976
24800	2	8571
24800	5	31913
24800	2	21338
24800	5	7697
17775	0	16105
17775	3	24830
19542	2	7478
23744	0	548
15752	0	6515
15752	2	20778
15752	2	19769
15752	2	19281
15752	2	429
15752	2	31182
15752	2	25780
23781	2	1782
2106	0	24447
2106	3	19585
19344	2	4527
19344	2	16944
7435	5	23944
17013	0	11600
17013	1	26108
31419	0	8733
6634	0	5796
16860	0	2536
16860	2	8209
6456	0	4370
6456	5	22879
20834	2	18321
[truncated: 65,774 more rows]
