# Supplementary material
Source: ML conference proceedings conference paper supplement (https://proceedings.neurips.cc/paper_files/paper/2021/hash/0fd600c953cde8121262e322ef09f70e-Abstract.html)
Supplement: Supplementary file 1 [file 0fd600c953cde8121262e322ef09f70e-Supplemental.zip › Supplementary_Material_Paper_8745/data/rule/GraIL-BM_nell_v3/pattern4/confidence1/test-graph-18.txt]

a	concept:subpartof	b
b	concept:agentcompeteswithagent	a
a	concept:subpartof	b
b	concept:agentcompeteswithagent	c
